# Supplementary material
Source: PubMed Central journal article supplement (PMC9392466)

rs140365013

G/A 6:27523869  
+- het\_P: 0.016 het\_I: 75.7

ngt info p\_value f\_ca(n) f\_co(n) ln(OR) STDerr

PGC\_SCZ wave3 eur only 0 1.00 7.86e-40 0.926(53386) 0.909(77258) 0.21 0.016

PGC\_SCZ afram only - 0.97 0.842 -(6152) 0.974(3918) -0.019 0.093

PGC\_SCZ latino only - 0.99 0.00666 -(1234) 0.977(3090) 0.477 0.176

PGC\_SCZ wave2 only 0 1.00 2.47e-24 0.925(34850) 0.912(44347) 0.207 0.02

PGC\_SCZ wave3 (excl. wave2) 0 0.99 5.86e-17 0.953(39926) 0.933(56676) 0.205 0.024

**PGC\_SCZ wave3 (incl. wave2) 0 1.00 1.2e-39 0.938(74776) 0.921(101023) 0.206 0.016**

Decode - Replication - 1.00 0.0192 0.939(1979) 0.93(142627) 0.195 0.083

**PGC\_SCZ wave3 (incl. wave2 and replication) 0 1.00 6.81e-41 0.938(76755) 0.926(243650) 0.205 0.015**

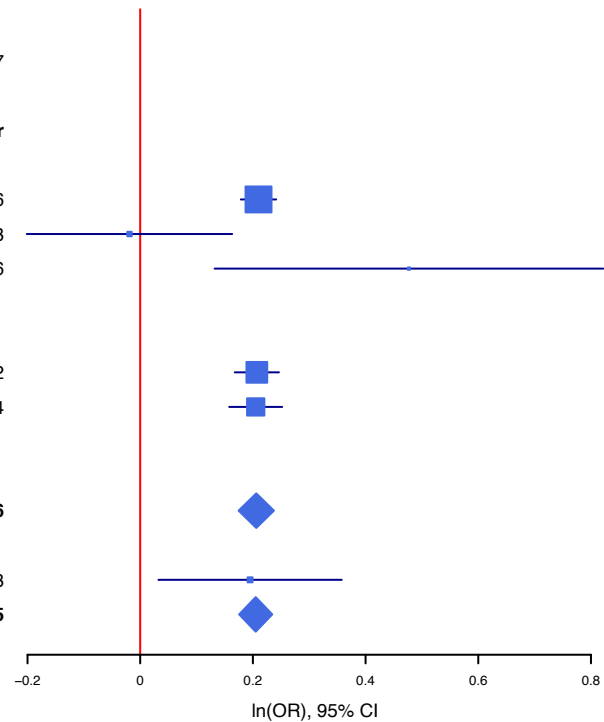

rs58120505                    T/C                    7:2029867  
 +++                    het\_P:                    0.749    het\_I:                    0.0

|                                                    | ngt      | info        | p_value         | f_ca(n)             | f_co(n)              | ln(OR)       | STDerr       |
|----------------------------------------------------|----------|-------------|-----------------|---------------------|----------------------|--------------|--------------|
| PGC_SCZ wave3 eur only                             | 2        | 0.99        | 2.23e-24        | 0.602(53386)        | 0.582(77258)         | 0.09         | 0.009        |
| PGC_SCZ wave3 asn only                             | 0        | 1.00        | 0.000522        | 0.442(14004)        | 0.425(16757)         | 0.059        | 0.017        |
| PGC_SCZ afram only                                 | -        | 0.99        | 0.0914          | -(6152)             | 0.768(3918)          | 0.059        | 0.035        |
| PGC_SCZ latino only                                | -        | 1.03        | 0.0542          | -(1234)             | 0.37(3090)           | 0.098        | 0.051        |
| PGC_SCZ wave2 only                                 | 0        | 1.00        | 2.61e-14        | 0.598(34850)        | 0.587(44347)         | 0.084        | 0.011        |
| PGC_SCZ wave3 (excl. wave2)                        | 2        | 1.00        | 4.73e-15        | 0.55(39926)         | 0.538(56676)         | 0.081        | 0.01         |
| <b>PGC_SCZ wave3 (incl. wave2)</b>                 | <b>2</b> | <b>1.00</b> | <b>6.26e-28</b> | <b>0.569(74776)</b> | <b>0.557(101023)</b> | <b>0.083</b> | <b>0.008</b> |
| Decode – Replication                               | -        | 1.00        | 0.0801          | 0.604(1979)         | 0.58(142627)         | 0.068        | 0.039        |
| <b>PGC_SCZ wave3 (incl. wave2 and replication)</b> | <b>2</b> | <b>1.00</b> | <b>8.72e-29</b> | <b>0.57(76755)</b>  | <b>0.57(243650)</b>  | <b>0.082</b> | <b>0.007</b> |

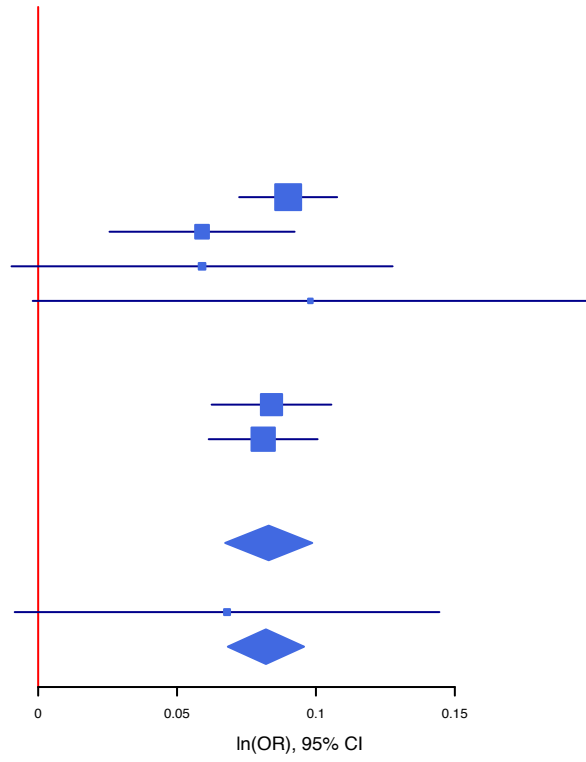

rs12571643

G/A  
---  
10:104520277  
het\_P: 0.015 het\_I: 76.1

|                                                    | ngt      | info        | p_value         | f_ca(n)             | f_co(n)              | ln(OR)       | STDerr       |
|----------------------------------------------------|----------|-------------|-----------------|---------------------|----------------------|--------------|--------------|
| PGC_SCZ wave3 eur only                             | 0        | 1.00        | 4.22e-11        | 0.919(53386)        | 0.912(77258)         | 0.102        | 0.016        |
| PGC_SCZ wave3 asn only                             | 0        | 0.99        | 4.46e-13        | 0.607(14004)        | 0.58(16757)          | 0.126        | 0.017        |
| PGC_SCZ afram only                                 | -        | 0.89        | 0.000188        | -(6152)             | 0.975(3918)          | 0.364        | 0.098        |
| PGC_SCZ latino only                                | -        | 1.01        | 0.613           | -(1234)             | 0.787(3090)          | 0.031        | 0.062        |
| PGC_SCZ wave2 only                                 | 0        | 1.00        | 4.03e-09        | 0.903(34850)        | 0.905(44347)         | 0.111        | 0.019        |
| PGC_SCZ wave3 (excl. wave2)                        | 0        | 0.98        | 4.15e-16        | 0.834(39926)        | 0.829(56676)         | 0.115        | 0.014        |
| <b>PGC_SCZ wave3 (incl. wave2)</b>                 | <b>0</b> | <b>0.99</b> | <b>1.25e-23</b> | <b>0.861(74776)</b> | <b>0.858(101023)</b> | <b>0.113</b> | <b>0.011</b> |
| Decode – Replication                               | -        | 1.00        | 0.00861         | 0.895(1979)         | 0.913(142627)        | 0.171        | 0.065        |
| <b>PGC_SCZ wave3 (incl. wave2 and replication)</b> | <b>0</b> | <b>0.99</b> | <b>4.41e-25</b> | <b>0.862(76755)</b> | <b>0.888(243650)</b> | <b>0.115</b> | <b>0.011</b> |

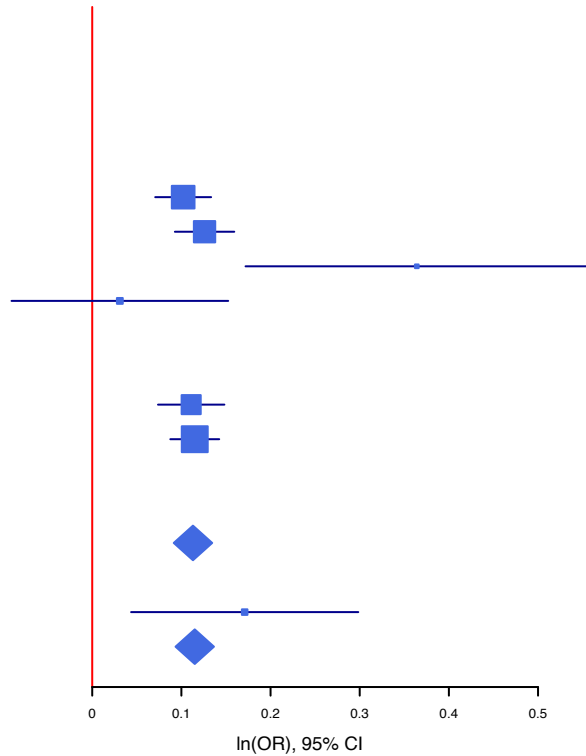

rs4702

G/A

15:91426560

--+

het\_P:

0.237

het\_I:

30.6

|  | ngt | info | p_value | f_ca(n) | f_co(n) | ln(OR) | STDerr |
|--|-----|------|---------|---------|---------|--------|--------|
|--|-----|------|---------|---------|---------|--------|--------|

PGC\_SCZ wave3 eur only

|                        |    |      |          |              |             |       |       |
|------------------------|----|------|----------|--------------|-------------|-------|-------|
| PGC_SCZ wave3 eur only | 53 | 0.95 | 2.79e-21 | 0.461(53386) | 0.44(77258) | 0.084 | 0.009 |
|------------------------|----|------|----------|--------------|-------------|-------|-------|

PGC\_SCZ wave3 asn only

|                        |   |      |         |              |              |       |       |
|------------------------|---|------|---------|--------------|--------------|-------|-------|
| PGC_SCZ wave3 asn only | 7 | 0.79 | 0.00106 | 0.479(14004) | 0.471(16757) | 0.062 | 0.019 |
|------------------------|---|------|---------|--------------|--------------|-------|-------|

PGC\_SCZ afram only

|                    |   |      |        |         |             |       |       |
|--------------------|---|------|--------|---------|-------------|-------|-------|
| PGC_SCZ afram only | - | 0.90 | 0.0395 | -(6152) | 0.123(3918) | 0.099 | 0.048 |
|--------------------|---|------|--------|---------|-------------|-------|-------|

PGC\_SCZ latino only

|                     |   |      |       |         |             |        |       |
|---------------------|---|------|-------|---------|-------------|--------|-------|
| PGC_SCZ latino only | - | 0.73 | 0.771 | -(1234) | 0.413(3090) | -0.017 | 0.059 |
|---------------------|---|------|-------|---------|-------------|--------|-------|

PGC\_SCZ wave2 only

|                    |    |      |          |              |             |       |       |
|--------------------|----|------|----------|--------------|-------------|-------|-------|
| PGC_SCZ wave2 only | 23 | 0.93 | 8.77e-11 | 0.459(34850) | 0.44(44347) | 0.074 | 0.011 |
|--------------------|----|------|----------|--------------|-------------|-------|-------|

PGC\_SCZ wave3 (excl. wave2)

|                             |    |      |          |             |              |       |       |
|-----------------------------|----|------|----------|-------------|--------------|-------|-------|
| PGC_SCZ wave3 (excl. wave2) | 37 | 0.88 | 1.47e-14 | 0.39(39926) | 0.396(56676) | 0.084 | 0.011 |
|-----------------------------|----|------|----------|-------------|--------------|-------|-------|

**PGC\_SCZ wave3 (incl. wave2)**

|                                    |           |             |                 |                     |                      |              |              |
|------------------------------------|-----------|-------------|-----------------|---------------------|----------------------|--------------|--------------|
| <b>PGC_SCZ wave3 (incl. wave2)</b> | <b>60</b> | <b>0.90</b> | <b>1.76e-23</b> | <b>0.417(74776)</b> | <b>0.413(101023)</b> | <b>0.079</b> | <b>0.008</b> |
|------------------------------------|-----------|-------------|-----------------|---------------------|----------------------|--------------|--------------|

Decode - Replication

|                      |   |      |         |             |               |       |       |
|----------------------|---|------|---------|-------------|---------------|-------|-------|
| Decode - Replication | - | 1.00 | 0.00915 | 0.449(1979) | 0.438(142627) | 0.099 | 0.038 |
|----------------------|---|------|---------|-------------|---------------|-------|-------|

**PGC\_SCZ wave3 (incl. wave2 and replication)**

|                                                    |           |             |                 |                     |                      |             |              |
|----------------------------------------------------|-----------|-------------|-----------------|---------------------|----------------------|-------------|--------------|
| <b>PGC_SCZ wave3 (incl. wave2 and replication)</b> | <b>60</b> | <b>0.95</b> | <b>5.67e-25</b> | <b>0.418(76755)</b> | <b>0.427(243650)</b> | <b>0.08</b> | <b>0.008</b> |
|----------------------------------------------------|-----------|-------------|-----------------|---------------------|----------------------|-------------|--------------|

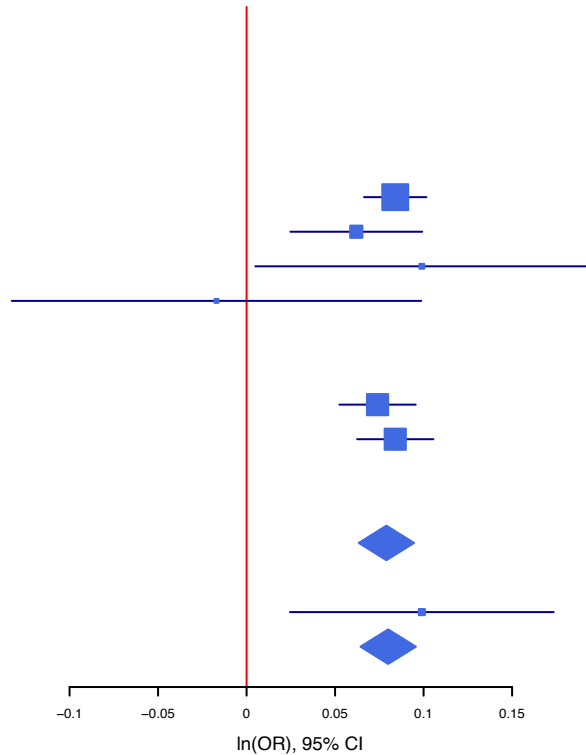

|                                                    | C/T      |             | 12:123669235    |                     | het_P:               | 0.628        | het_I:       | 0.0 |
|----------------------------------------------------|----------|-------------|-----------------|---------------------|----------------------|--------------|--------------|-----|
|                                                    | ngt      | info        | p_value         | f_ca(n)             |                      |              |              |     |
| PGC_SCZ wave3 eur only                             | 0        | 1.00        | 5.71e-14        | 0.269(53386)        | 0.253(77258)         | 0.074        | 0.01         |     |
| PGC_SCZ wave3 asn only                             | 0        | 0.99        | 2.41e-12        | 0.313(14004)        | 0.288(16757)         | 0.13         | 0.018        |     |
| PGC_SCZ afram only                                 | -        | 1.00        | 0.0381          | -(6152)             | 0.78(3918)           | 0.076        | 0.036        |     |
| PGC_SCZ latino only                                | -        | 1.00        | 0.495           | -(1234)             | 0.33(3090)           | 0.036        | 0.053        |     |
| PGC_SCZ wave2 only                                 | 0        | 1.00        | 4.22e-11        | 0.273(34850)        | 0.255(44347)         | 0.081        | 0.012        |     |
| PGC_SCZ wave3 (excl. wave2)                        | 0        | 1.00        | 1.69e-14        | 0.391(39926)        | 0.351(56676)         | 0.087        | 0.011        |     |
| <b>PGC_SCZ wave3 (incl. wave2)</b>                 | <b>0</b> | <b>1.00</b> | <b>6.91e-24</b> | <b>0.345(74776)</b> | <b>0.314(101023)</b> | <b>0.084</b> | <b>0.008</b> |     |
| Decode – Replication                               | -        | 1.00        | 0.212           | 0.289(1979)         | 0.275(142627)        | 0.052        | 0.042        |     |
| <b>PGC_SCZ wave3 (incl. wave2 and replication)</b> | <b>0</b> | <b>1.00</b> | <b>7.26e-24</b> | <b>0.344(76755)</b> | <b>0.293(243650)</b> | <b>0.083</b> | <b>0.008</b> |     |

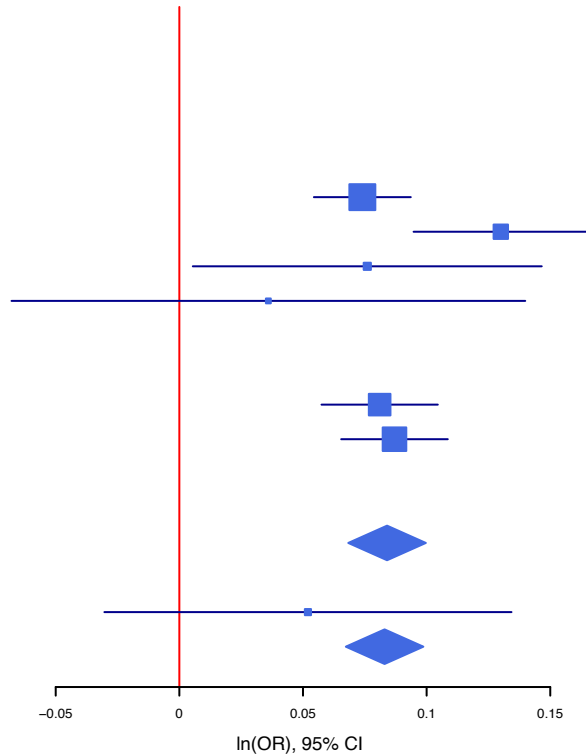

| rs13107325                                         | C/T       |             | 4:103188709     |                     | het_P:               | 0.486         | het_I:       | 0.0 |
|----------------------------------------------------|-----------|-------------|-----------------|---------------------|----------------------|---------------|--------------|-----|
|                                                    | ngt       | info        | p_value         | f_ca(n)             |                      |               |              |     |
| PGC_SCZ wave3 eur only                             | 66        | 0.98        | 2.9e-21         | 0.919(53386)        | 0.933(77258)         | -0.159        | 0.017        |     |
| PGC_SCZ afram only                                 | -         | 0.94        | 0.108           | -(6152)             | 0.984(3918)          | -0.199        | 0.124        |     |
| PGC_SCZ latino only                                | -         | 0.97        | 0.834           | -(1234)             | 0.953(3090)          | -0.024        | 0.116        |     |
| PGC_SCZ wave2 only                                 | 28        | 0.96        | 4.89e-15        | 0.921(34850)        | 0.934(44347)         | -0.172        | 0.022        |     |
| PGC_SCZ wave3 (excl. wave2)                        | 38        | 0.98        | 3.24e-08        | 0.943(39926)        | 0.947(56676)         | -0.138        | 0.025        |     |
| <b>PGC_SCZ wave3 (incl. wave2)</b>                 | <b>66</b> | <b>0.97</b> | <b>1.92e-21</b> | <b>0.931(74776)</b> | <b>0.94(101023)</b>  | <b>-0.157</b> | <b>0.016</b> |     |
| Decode – Replication                               | -         | 1.00        | 0.000861        | 0.926(1979)         | 0.92(142627)         | -0.31         | 0.093        |     |
| <b>PGC_SCZ wave3 (incl. wave2 and replication)</b> | <b>66</b> | <b>0.99</b> | <b>3e-23</b>    | <b>0.931(76755)</b> | <b>0.929(243650)</b> | <b>-0.161</b> | <b>0.016</b> |     |

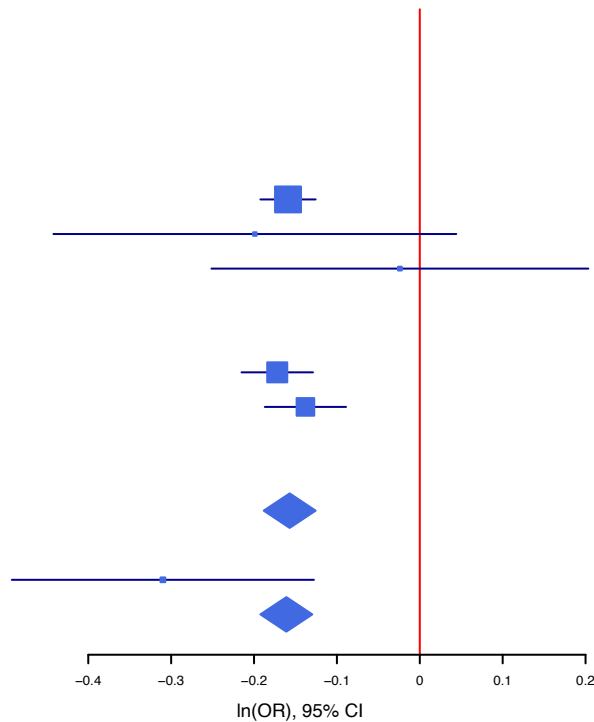

| rs4298967                                          | A/G       |             | 12:2408194      |                     | het_P:               | 0.389        | het_I:       | 0.0 |
|----------------------------------------------------|-----------|-------------|-----------------|---------------------|----------------------|--------------|--------------|-----|
|                                                    | ngt       | info        | p_value         | f_ca(n)             |                      |              |              |     |
| PGC_SCZ wave3 eur only                             | 47        | 0.99        | 3.33e-21        | 0.358(53386)        | 0.341(77258)         | 0.086        | 0.009        |     |
| PGC_SCZ wave3 asn only                             | 4         | 0.88        | 0.0501          | 0.058(14004)        | 0.053(16757)         | 0.078        | 0.04         |     |
| PGC_SCZ afram only                                 | -         | 1.00        | 0.351           | -(6152)             | 0.111(3918)          | 0.044        | 0.047        |     |
| PGC_SCZ latino only                                | -         | 1.00        | 0.669           | -(1234)             | 0.262(3090)          | 0.024        | 0.056        |     |
| PGC_SCZ wave2 only                                 | 17        | 0.98        | 1.59e-17        | 0.346(34850)        | 0.337(44347)         | 0.099        | 0.012        |     |
| PGC_SCZ wave3 (excl. wave2)                        | 34        | 0.97        | 9.65e-07        | 0.219(39926)        | 0.229(56676)         | 0.063        | 0.013        |     |
| <b>PGC_SCZ wave3 (incl. wave2)</b>                 | <b>51</b> | <b>0.97</b> | <b>1.28e-21</b> | <b>0.269(74776)</b> | <b>0.271(101023)</b> | <b>0.083</b> | <b>0.009</b> |     |
| Decode – Replication                               | -         | 1.00        | 0.109           | 0.334(1979)         | 0.338(142627)        | 0.064        | 0.04         |     |
| <b>PGC_SCZ wave3 (incl. wave2 and replication)</b> | <b>51</b> | <b>0.99</b> | <b>2.59e-22</b> | <b>0.27(76755)</b>  | <b>0.308(243650)</b> | <b>0.082</b> | <b>0.008</b> |     |

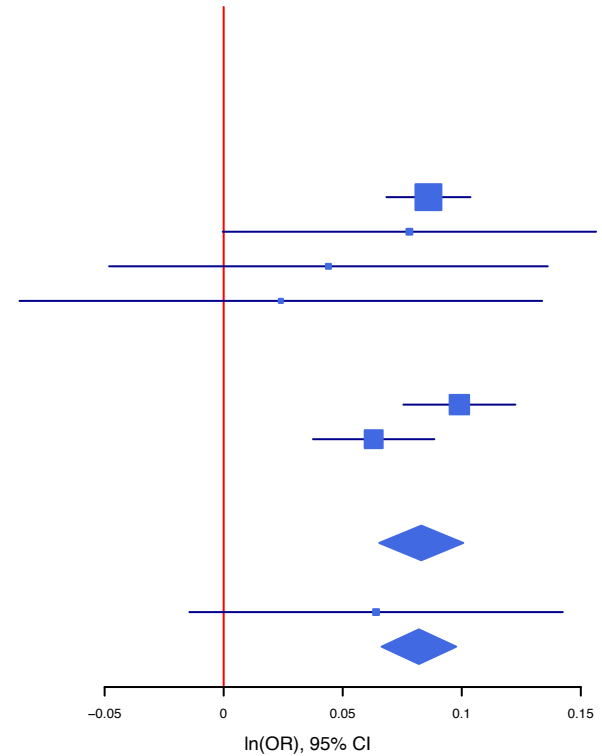

| rs2710323                                          | T/C       |             | 3:52815905      |                   |                      |              |              |
|----------------------------------------------------|-----------|-------------|-----------------|-------------------|----------------------|--------------|--------------|
|                                                    | +++       | het_P:      | 0.393           | het_I:            | 0.0                  |              |              |
|                                                    | ngt       | info        | p_value         | f_ca(n)           | f_co(n)              | ln(OR)       | STDerr       |
| PGC_SCZ wave3 eur only                             | 24        | 0.99        | 1.23e-19        | 0.531(53386)      | 0.51(77258)          | 0.078        | 0.009        |
| PGC_SCZ wave3 asn only                             | 2         | 0.99        | 0.000686        | 0.594(14004)      | 0.588(16757)         | 0.059        | 0.017        |
| PGC_SCZ afram only                                 | -         | 0.99        | 0.27            | -(6152)           | 0.339(3918)          | 0.034        | 0.031        |
| PGC_SCZ latino only                                | -         | 1.00        | 0.377           | -(1234)           | 0.381(3090)          | 0.045        | 0.051        |
| PGC_SCZ wave2 only                                 | 16        | 0.99        | 1.65e-10        | 0.532(34850)      | 0.513(44347)         | 0.07         | 0.011        |
| PGC_SCZ wave3 (excl. wave2)                        | 10        | 0.99        | 5.23e-13        | 0.479(39926)      | 0.482(56676)         | 0.074        | 0.01         |
| <b>PGC_SCZ wave3 (incl. wave2)</b>                 | <b>26</b> | <b>0.99</b> | <b>3.18e-22</b> | <b>0.5(74776)</b> | <b>0.494(101023)</b> | <b>0.072</b> | <b>0.007</b> |
| Decode – Replication                               | -         | 1.00        | 0.568           | 0.494(1979)       | 0.495(142627)        | -0.021       | 0.037        |
| <b>PGC_SCZ wave3 (incl. wave2 and replication)</b> | <b>26</b> | <b>1.00</b> | <b>5.76e-21</b> | <b>0.5(76755)</b> | <b>0.495(243650)</b> | <b>0.068</b> | <b>0.007</b> |

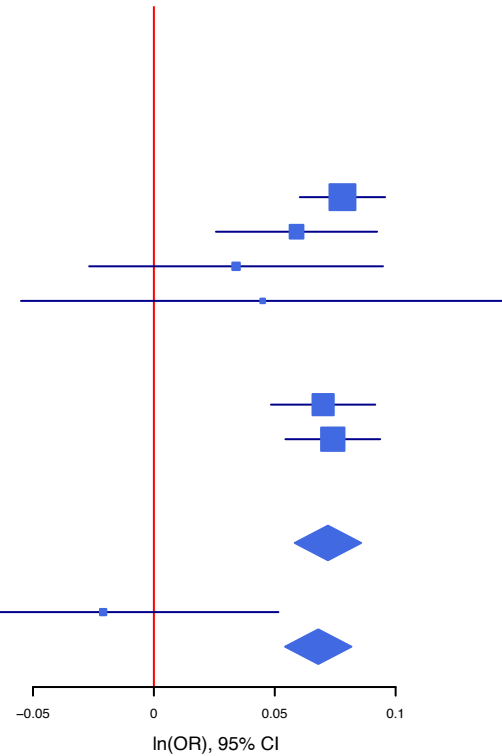



rs2139054                    **A/C**                    **2:58156583**  
 ---                                    het\_P:                    0.186    het\_I:                    40.5

|                                                    | ngt      | info        | p_value         | f_ca(n)             | f_co(n)              | ln(OR)        | STDerr       |
|----------------------------------------------------|----------|-------------|-----------------|---------------------|----------------------|---------------|--------------|
| PGC_SCZ wave3 eur only                             | 0        | 1.00        | 7.94e-15        | 0.385(53386)        | 0.401(77258)         | -0.068        | 0.009        |
| PGC_SCZ wave3 asn only                             | 0        | 0.99        | 1.95e-08        | 0.299(14004)        | 0.323(16757)         | -0.104        | 0.018        |
| PGC_SCZ afram only                                 | -        | 0.99        | 0.593           | -(6152)             | 0.146(3918)          | -0.022        | 0.042        |
| PGC_SCZ latino only                                | -        | 1.01        | 0.922           | -(1234)             | 0.439(3090)          | -0.005        | 0.05         |
| PGC_SCZ wave2 only                                 | 0        | 1.00        | 1.56e-09        | 0.382(34850)        | 0.4(44347)           | -0.067        | 0.011        |
| PGC_SCZ wave3 (excl. wave2)                        | 0        | 1.00        | 1.8e-12         | 0.328(39926)        | 0.351(56676)         | -0.076        | 0.011        |
| <b>PGC_SCZ wave3 (incl. wave2)</b>                 | <b>0</b> | <b>1.00</b> | <b>1.04e-20</b> | <b>0.349(74776)</b> | <b>0.369(101023)</b> | <b>-0.072</b> | <b>0.008</b> |
| Decode – Replication                               | -        | 1.00        | 0.161           | 0.418(1979)         | 0.408(142627)        | -0.054        | 0.039        |
| <b>PGC_SCZ wave3 (incl. wave2 and replication)</b> | <b>0</b> | <b>1.00</b> | <b>5.77e-21</b> | <b>0.351(76755)</b> | <b>0.39(243650)</b>  | <b>-0.071</b> | <b>0.008</b> |

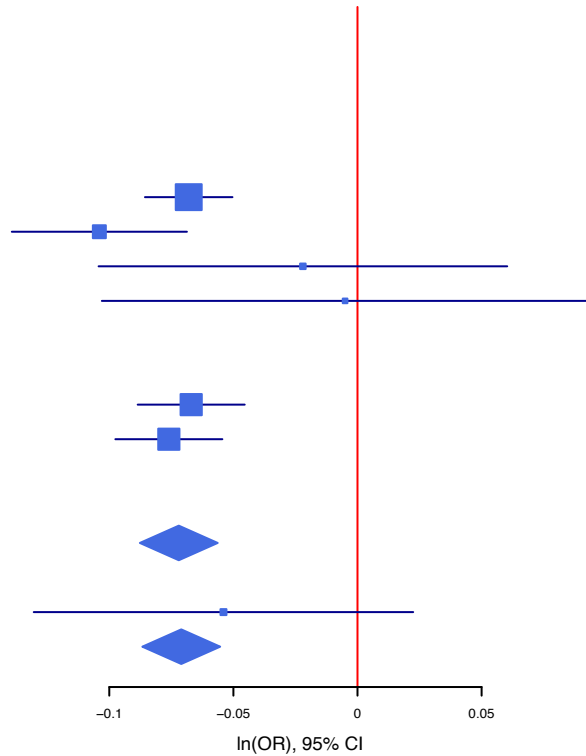

rs4950119                    **A/C**                    **1:98491248**  
 --+                    het\_P:                    0.028    het\_I:                    72.0

|                        | ngt | info | p_value  | f_ca(n)      | f_co(n)      | ln(OR) | STDerr |
|------------------------|-----|------|----------|--------------|--------------|--------|--------|
| PGC_SCZ wave3 eur only | 7   | 1.00 | 8.77e-21 | 0.179(53386) | 0.198(77258) | -0.103 | 0.011  |
| PGC_SCZ wave3 asn only | 0   | 0.98 | 0.379    | 0.062(14004) | 0.065(16757) | -0.031 | 0.035  |
| PGC_SCZ afram only     | -   | 0.98 | 0.529    | -(6152)      | 0.088(3918)  | 0.033  | 0.052  |
| PGC_SCZ latino only    | -   | 0.99 | 0.929    | -(1234)      | 0.082(3090)  | 0.008  | 0.09   |

|                             |   |      |          |              |              |        |       |
|-----------------------------|---|------|----------|--------------|--------------|--------|-------|
| PGC_SCZ wave2 only          | 1 | 1.00 | 5.13e-14 | 0.176(34850) | 0.197(44347) | -0.105 | 0.014 |
| PGC_SCZ wave3 (excl. wave2) | 6 | 0.99 | 1.27e-06 | 0.114(39926) | 0.133(56676) | -0.073 | 0.015 |

**PGC\_SCZ wave3 (incl. wave2)**                    **7**    **1.00**    **8.36e-19**    **0.138(74776)**    **0.157(101023)**    **-0.091**    **0.01**

Decode – Replication                    -    1.00    0.00458    0.219(1979)    0.208(142627)    -0.13    0.046

**PGC\_SCZ wave3 (incl. wave2 and replication)**                    **7**    **1.00**    **1.61e-20**    **0.14(76755)**    **0.185(243650)**    **-0.092**    **0.01**

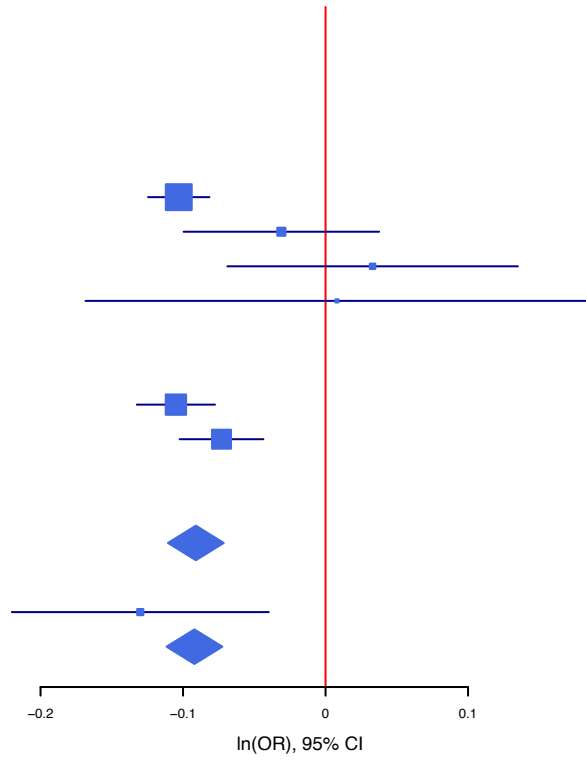

| rs7779548                                          | G/A       |             | 7:137074540     |                     | het_P:               | 0.655        | het_I:       | 0.0 |
|----------------------------------------------------|-----------|-------------|-----------------|---------------------|----------------------|--------------|--------------|-----|
|                                                    | ngt       | info        | p_value         | f_ca(n)             |                      |              |              |     |
| PGC_SCZ wave3 eur only                             | 17        | 1.00        | 3.02e-13        | 0.659(53386)        | 0.644(77258)         | 0.066        | 0.009        |     |
| PGC_SCZ wave3 asn only                             | 1         | 0.97        | 8.58e-07        | 0.699(14004)        | 0.679(16757)         | 0.092        | 0.019        |     |
| PGC_SCZ afram only                                 | -         | 1.01        | 0.331           | -(6152)             | 0.904(3918)          | 0.049        | 0.05         |     |
| PGC_SCZ latino only                                | -         | 1.02        | 0.0298          | -(1234)             | 0.644(3090)          | 0.113        | 0.052        |     |
| PGC_SCZ wave2 only                                 | 14        | 1.00        | 1.9e-07         | 0.657(34850)        | 0.642(44347)         | 0.059        | 0.011        |     |
| PGC_SCZ wave3 (excl. wave2)                        | 4         | 0.99        | 8.22e-14        | 0.716(39926)        | 0.692(56676)         | 0.083        | 0.011        |     |
| <b>PGC_SCZ wave3 (incl. wave2)</b>                 | <b>18</b> | <b>1.00</b> | <b>1.82e-19</b> | <b>0.693(74776)</b> | <b>0.673(101023)</b> | <b>0.071</b> | <b>0.008</b> |     |
| Decode – Replication                               | -         | 1.00        | 0.0943          | 0.667(1979)         | 0.642(142627)        | 0.068        | 0.041        |     |
| <b>PGC_SCZ wave3 (incl. wave2 and replication)</b> | <b>18</b> | <b>1.00</b> | <b>4.38e-20</b> | <b>0.692(76755)</b> | <b>0.656(243650)</b> | <b>0.071</b> | <b>0.008</b> |     |

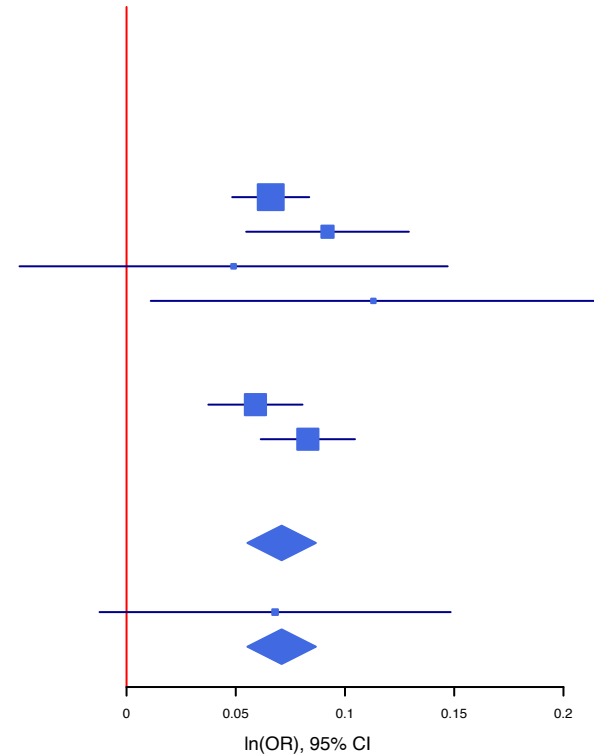

| rs4129585                                          | A/C       |             | 8:143312933     |                     | het_P:               | 0.028        | het_I:       | 72.2 |
|----------------------------------------------------|-----------|-------------|-----------------|---------------------|----------------------|--------------|--------------|------|
|                                                    | ngt       | info        | p_value         | f_ca(n)             |                      |              |              |      |
| PGC_SCZ wave3 eur only                             | 72        | 0.99        | 5.11e-18        | 0.456(53386)        | 0.438(77258)         | 0.075        | 0.009        |      |
| PGC_SCZ wave3 asn only                             | 8         | 0.96        | 0.0356          | 0.289(14004)        | 0.281(16757)         | 0.04         | 0.019        |      |
| PGC_SCZ afram only                                 | -         | 1.03        | 0.251           | -(6152)             | 0.13(3918)           | -0.05        | 0.044        |      |
| PGC_SCZ latino only                                | -         | 1.04        | 0.259           | -(1234)             | 0.287(3090)          | 0.06         | 0.054        |      |
| PGC_SCZ wave2 only                                 | 39        | 0.99        | 2.46e-13        | 0.447(34850)        | 0.433(44347)         | 0.08         | 0.011        |      |
| PGC_SCZ wave3 (excl. wave2)                        | 41        | 1.00        | 2.73e-06        | 0.321(39926)        | 0.335(56676)         | 0.051        | 0.011        |      |
| <b>PGC_SCZ wave3 (incl. wave2)</b>                 | <b>80</b> | <b>1.00</b> | <b>2.51e-17</b> | <b>0.371(74776)</b> | <b>0.373(101023)</b> | <b>0.065</b> | <b>0.008</b> |      |
| Decode – Replication                               | -         | 1.00        | 4.78e-05        | 0.421(1979)         | 0.445(142627)        | 0.154        | 0.038        |      |
| <b>PGC_SCZ wave3 (incl. wave2 and replication)</b> | <b>80</b> | <b>1.00</b> | <b>9.31e-20</b> | <b>0.372(76755)</b> | <b>0.413(243650)</b> | <b>0.069</b> | <b>0.008</b> |      |

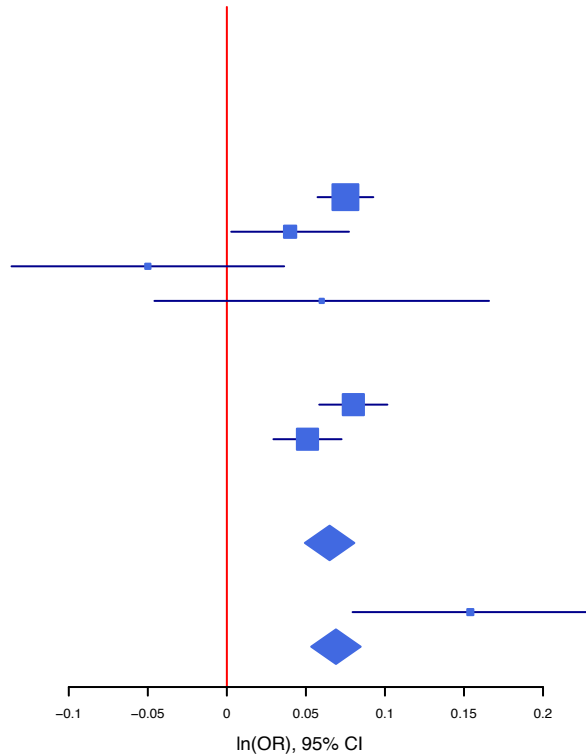

rs2902858                      T/C                      11:46524013  
 ---                                              het\_P:                      0.814    het\_I:                      0.0

|                                                    | ngt       | info        | p_value         | f_ca(n)             | f_co(n)              | ln(OR)        | STDerr      |
|----------------------------------------------------|-----------|-------------|-----------------|---------------------|----------------------|---------------|-------------|
| PGC_SCZ wave3 eur only                             | 18        | 1.00        | 1.08e-13        | 0.822(53386)        | 0.834(77258)         | -0.085        | 0.011       |
| PGC_SCZ wave3 asn only                             | 2         | 1.01        | 0.00175         | 0.933(14004)        | 0.94(16757)          | -0.108        | 0.034       |
| PGC_SCZ afram only                                 | -         | 0.99        | 0.00307         | -(6152)             | 0.634(3918)          | -0.091        | 0.031       |
| PGC_SCZ latino only                                | -         | 1.01        | 0.082           | -(1234)             | 0.898(3090)          | -0.138        | 0.079       |
| PGC_SCZ wave2 only                                 | 17        | 1.00        | 4.53e-11        | 0.828(34850)        | 0.838(44347)         | -0.096        | 0.014       |
| PGC_SCZ wave3 (excl. wave2)                        | 3         | 1.00        | 8.75e-09        | 0.825(39926)        | 0.836(56676)         | -0.081        | 0.014       |
| <b>PGC_SCZ wave3 (incl. wave2)</b>                 | <b>20</b> | <b>1.00</b> | <b>2.69e-18</b> | <b>0.826(74776)</b> | <b>0.837(101023)</b> | <b>-0.088</b> | <b>0.01</b> |
| Decode – Replication                               | -         | 1.00        | 0.0603          | 0.831(1979)         | 0.826(142627)        | -0.092        | 0.049       |
| <b>PGC_SCZ wave3 (incl. wave2 and replication)</b> | <b>20</b> | <b>1.00</b> | <b>4.57e-19</b> | <b>0.826(76755)</b> | <b>0.831(243650)</b> | <b>-0.088</b> | <b>0.01</b> |

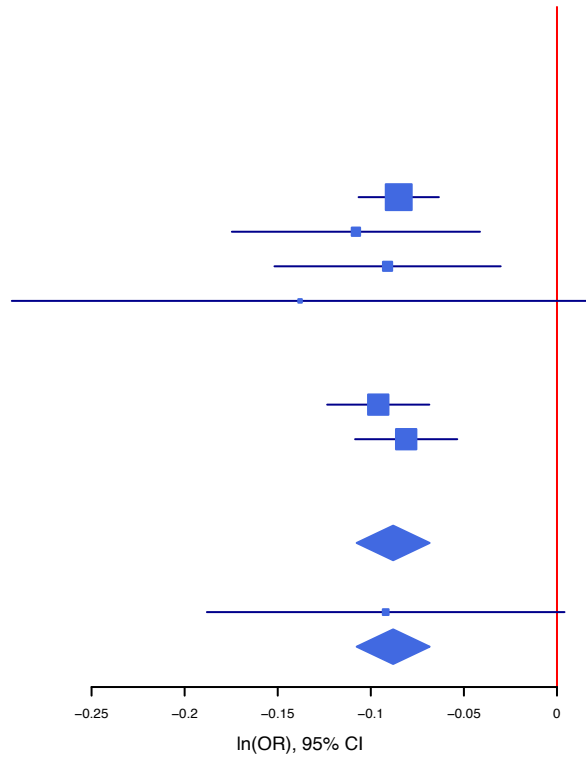

| rs2190873                                          | T/C      |             | 14:72424905     |                     |                      |              |              |
|----------------------------------------------------|----------|-------------|-----------------|---------------------|----------------------|--------------|--------------|
|                                                    | +++      | het_P:      | 0.984           | het_I:              | 0.0                  |              |              |
|                                                    | ngt      | info        | p_value         | f_ca(n)             | f_co(n)              | ln(OR)       | STDerr       |
| PGC_SCZ wave3 eur only                             | 6        | 1.00        | 1.15e-12        | 0.477(53386)        | 0.464(77258)         | 0.061        | 0.009        |
| PGC_SCZ wave3 asn only                             | 0        | 0.97        | 0.000101        | 0.471(14004)        | 0.458(16757)         | 0.067        | 0.017        |
| PGC_SCZ afram only                                 | -        | 0.95        | 0.0332          | -(6152)             | 0.322(3918)          | 0.068        | 0.032        |
| PGC_SCZ latino only                                | -        | 0.98        | 0.233           | -(1234)             | 0.556(3090)          | 0.061        | 0.051        |
| PGC_SCZ wave2 only                                 | 0        | 1.00        | 3.37e-06        | 0.479(34850)        | 0.466(44347)         | 0.051        | 0.011        |
| PGC_SCZ wave3 (excl. wave2)                        | 6        | 0.98        | 4.62e-13        | 0.459(39926)        | 0.453(56676)         | 0.074        | 0.01         |
| <b>PGC_SCZ wave3 (incl. wave2)</b>                 | <b>6</b> | <b>0.99</b> | <b>2.12e-17</b> | <b>0.467(74776)</b> | <b>0.459(101023)</b> | <b>0.063</b> | <b>0.007</b> |
| Decode – Replication                               | -        | 1.00        | 0.00502         | 0.476(1979)         | 0.482(142627)        | 0.106        | 0.038        |
| <b>PGC_SCZ wave3 (incl. wave2 and replication)</b> | <b>6</b> | <b>0.99</b> | <b>6.62e-19</b> | <b>0.467(76755)</b> | <b>0.472(243650)</b> | <b>0.065</b> | <b>0.007</b> |

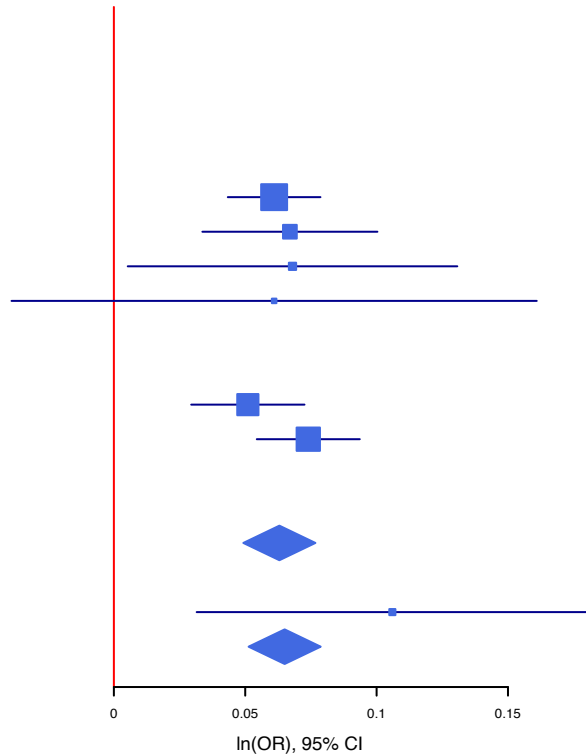

| rs12042444                                         | C/T      |             | 1:73988149      |                     | het_P:               | 0.219        | het_I:       | 34.2 |
|----------------------------------------------------|----------|-------------|-----------------|---------------------|----------------------|--------------|--------------|------|
|                                                    | ngt      | info        | p_value         | f_ca(n)             |                      |              |              |      |
| PGC_SCZ wave3 eur only                             | 0        | 0.99        | 5.51e-17        | 0.407(53386)        | 0.387(77258)         | 0.074        | 0.009        |      |
| PGC_SCZ wave3 asn only                             | 0        | 0.95        | 0.626           | 0.242(14004)        | 0.24(16757)          | 0.01         | 0.02         |      |
| PGC_SCZ afram only                                 | -        | 0.97        | 0.00137         | -(6152)             | 0.545(3918)          | 0.095        | 0.03         |      |
| PGC_SCZ latino only                                | -        | 1.04        | 0.886           | -(1234)             | 0.64(3090)           | -0.007       | 0.051        |      |
| PGC_SCZ wave2 only                                 | 0        | 0.99        | 4.05e-09        | 0.393(34850)        | 0.383(44347)         | 0.066        | 0.011        |      |
| PGC_SCZ wave3 (excl. wave2)                        | 0        | 0.99        | 3.74e-09        | 0.446(39926)        | 0.416(56676)         | 0.063        | 0.011        |      |
| <b>PGC_SCZ wave3 (incl. wave2)</b>                 | <b>0</b> | <b>0.99</b> | <b>8.53e-17</b> | <b>0.425(74776)</b> | <b>0.404(101023)</b> | <b>0.064</b> | <b>0.008</b> |      |
| Decode – Replication                               | -        | 1.00        | 0.000478        | 0.415(1979)         | 0.424(142627)        | 0.134        | 0.038        |      |
| <b>PGC_SCZ wave3 (incl. wave2 and replication)</b> | <b>0</b> | <b>1.00</b> | <b>7e-19</b>    | <b>0.425(76755)</b> | <b>0.415(243650)</b> | <b>0.067</b> | <b>0.008</b> |      |

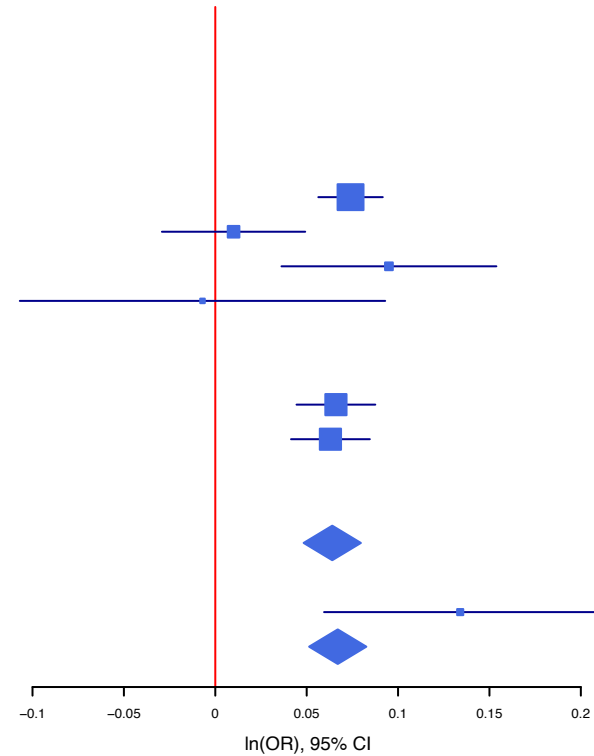

| rs7709645                                          | G/C      |             | 5:60731458      |                     | het_P:               | 0.314         | het_I:       | 13.8 |
|----------------------------------------------------|----------|-------------|-----------------|---------------------|----------------------|---------------|--------------|------|
|                                                    | +++      |             |                 |                     |                      |               |              |      |
|                                                    | ngt      | info        | p_value         | f_ca(n)             | f_co(n)              | ln(OR)        | STDerr       |      |
| PGC_SCZ wave3 eur only                             | 0        | 1.00        | 8.29e-16        | 0.497(53386)        | 0.515(77258)         | -0.069        | 0.009        |      |
| PGC_SCZ wave3 asn only                             | 7        | 0.97        | 0.273           | 0.787(14004)        | 0.791(16757)         | -0.023        | 0.021        |      |
| PGC_SCZ afram only                                 | -        | 1.14        | 0.0744          | -(6152)             | 0.257(3918)          | -0.075        | 0.042        |      |
| PGC_SCZ latino only                                | -        | 0.94        | 0.00629         | -(1234)             | 0.462(3090)          | -0.142        | 0.052        |      |
| PGC_SCZ wave2 only                                 | 0        | 1.00        | 3.8e-12         | 0.514(34850)        | 0.524(44347)         | -0.076        | 0.011        |      |
| PGC_SCZ wave3 (excl. wave2)                        | 7        | 1.00        | 9.49e-07        | 0.507(39926)        | 0.527(56676)         | -0.054        | 0.011        |      |
| <b>PGC_SCZ wave3 (incl. wave2)</b>                 | <b>7</b> | <b>1.00</b> | <b>6.11e-17</b> | <b>0.509(74776)</b> | <b>0.526(101023)</b> | <b>-0.065</b> | <b>0.008</b> |      |
| Decode – Replication                               | -        | 1.00        | 0.000491        | 0.528(1979)         | 0.527(142627)        | -0.131        | 0.038        |      |
| <b>PGC_SCZ wave3 (incl. wave2 and replication)</b> | <b>7</b> | <b>1.00</b> | <b>7.58e-19</b> | <b>0.509(76755)</b> | <b>0.526(243650)</b> | <b>-0.068</b> | <b>0.008</b> |      |

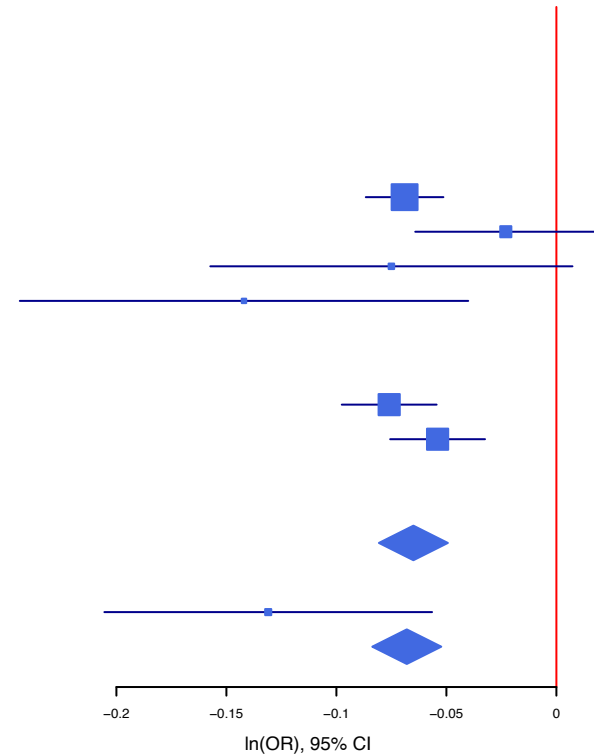



| rs3740400                                          | T/G      | 10:104629465 |                 |                     |                      |              |              |
|----------------------------------------------------|----------|--------------|-----------------|---------------------|----------------------|--------------|--------------|
|                                                    | ++-      | het_P:       | 0.051           | het_I:              | 66.4                 |              |              |
|                                                    | ngt      | info         | p_value         | f_ca(n)             | f_co(n)              | ln(OR)       | STDerr       |
| PGC_SCZ wave3 eur only                             | 1        | 1.00         | 2.31e-12        | 0.643(53386)        | 0.633(77258)         | 0.063        | 0.009        |
| PGC_SCZ wave3 asn only                             | 3        | 0.98         | 2.61e-07        | 0.459(14004)        | 0.434(16757)         | 0.089        | 0.017        |
| PGC_SCZ afram only                                 | -        | 1.00         | 0.781           | -(6152)             | 0.637(3918)          | 0.008        | 0.03         |
| PGC_SCZ latino only                                | -        | 0.99         | 0.788           | -(1234)             | 0.609(3090)          | -0.014       | 0.051        |
| PGC_SCZ wave2 only                                 | 2        | 1.00         | 3.55e-14        | 0.636(34850)        | 0.625(44347)         | 0.085        | 0.011        |
| PGC_SCZ wave3 (excl. wave2)                        | 2        | 0.99         | 2.06e-05        | 0.592(39926)        | 0.589(56676)         | 0.044        | 0.01         |
| <b>PGC_SCZ wave3 (incl. wave2)</b>                 | <b>4</b> | <b>1.00</b>  | <b>1.01e-16</b> | <b>0.609(74776)</b> | <b>0.603(101023)</b> | <b>0.063</b> | <b>0.008</b> |
| Decode – Replication                               | -        | 1.00         | 0.00572         | 0.611(1979)         | 0.63(142627)         | 0.108        | 0.039        |
| <b>PGC_SCZ wave3 (incl. wave2 and replication)</b> | <b>4</b> | <b>1.00</b>  | <b>5.72e-18</b> | <b>0.609(76755)</b> | <b>0.618(243650)</b> | <b>0.064</b> | <b>0.008</b> |

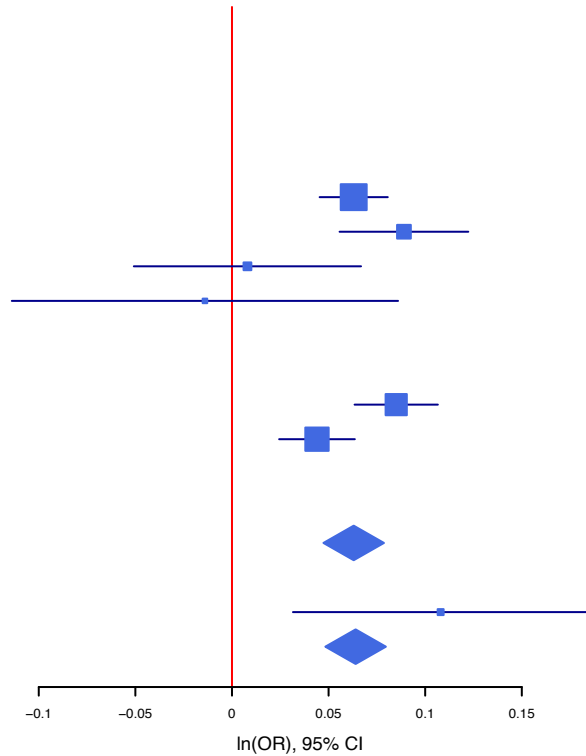

rs71312200                      **A/T**                      **3:180729148**

++-                      het\_P:                      0.399                      het\_I:                      0.0

|                                                    | ngt      | info        | p_value         | f_ca(n)             | f_co(n)              | ln(OR)       | STDerr      |
|----------------------------------------------------|----------|-------------|-----------------|---------------------|----------------------|--------------|-------------|
| PGC_SCZ wave3 eur only                             | 0        | 1.00        | 1.38e-12        | 0.812(53386)        | 0.801(77258)         | 0.077        | 0.011       |
| PGC_SCZ wave3 asn only                             | 0        | 0.97        | 1.01e-06        | 0.872(14004)        | 0.856(16757)         | 0.126        | 0.026       |
| PGC_SCZ afram only                                 | -        | 0.93        | 0.167           | -(6152)             | 0.914(3918)          | 0.074        | 0.054       |
| PGC_SCZ latino only                                | -        | 1.00        | 0.877           | -(1234)             | 0.858(3090)          | -0.011       | 0.07        |
| PGC_SCZ wave2 only                                 | 0        | 0.99        | 5.5e-07         | 0.817(34850)        | 0.805(44347)         | 0.07         | 0.014       |
| PGC_SCZ wave3 (excl. wave2)                        | 0        | 0.98        | 4.8e-12         | 0.853(39926)        | 0.837(56676)         | 0.095        | 0.014       |
| <b>PGC_SCZ wave3 (incl. wave2)</b>                 | <b>0</b> | <b>0.99</b> | <b>2.34e-17</b> | <b>0.839(74776)</b> | <b>0.825(101023)</b> | <b>0.083</b> | <b>0.01</b> |
| Decode – Replication                               | -        | 1.00        | 0.227           | 0.799(1979)         | 0.797(142627)        | 0.058        | 0.048       |
| <b>PGC_SCZ wave3 (incl. wave2 and replication)</b> | <b>0</b> | <b>0.99</b> | <b>9.85e-18</b> | <b>0.838(76755)</b> | <b>0.81(243650)</b>  | <b>0.081</b> | <b>0.01</b> |

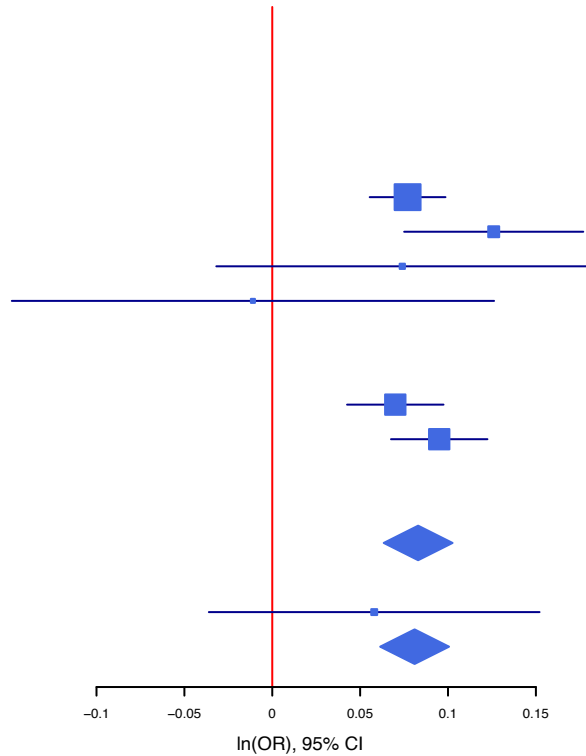

| rs7893279                                          | T/G       |             | 10:18745105     |                     | het_P:               | 0.503        | het_I:       | 0.0 |
|----------------------------------------------------|-----------|-------------|-----------------|---------------------|----------------------|--------------|--------------|-----|
|                                                    | ngt       | info        | p_value         | f_ca(n)             |                      |              |              |     |
| PGC_SCZ wave3 eur only                             | 36        | 1.00        | 6.53e-12        | 0.898(53386)        | 0.887(77258)         | 0.096        | 0.014        |     |
| PGC_SCZ wave3 asn only                             | 5         | 0.96        | 0.0017          | 0.919(14004)        | 0.914(16757)         | 0.099        | 0.032        |     |
| PGC_SCZ afram only                                 | -         | 0.99        | 0.0898          | -(6152)             | 0.943(3918)          | 0.106        | 0.063        |     |
| PGC_SCZ latino only                                | -         | 1.00        | 0.00796         | -(1234)             | 0.819(3090)          | 0.175        | 0.066        |     |
| PGC_SCZ wave2 only                                 | 28        | 1.00        | 5.45e-10        | 0.899(34850)        | 0.887(44347)         | 0.109        | 0.018        |     |
| PGC_SCZ wave3 (excl. wave2)                        | 13        | 0.99        | 1.48e-07        | 0.896(39926)        | 0.891(56676)         | 0.09         | 0.017        |     |
| <b>PGC_SCZ wave3 (incl. wave2)</b>                 | <b>41</b> | <b>0.99</b> | <b>6.54e-16</b> | <b>0.897(74776)</b> | <b>0.89(101023)</b>  | <b>0.1</b>   | <b>0.012</b> |     |
| Decode – Replication                               | -         | 1.00        | 0.00179         | 0.893(1979)         | 0.893(142627)        | 0.191        | 0.061        |     |
| <b>PGC_SCZ wave3 (incl. wave2 and replication)</b> | <b>41</b> | <b>1.00</b> | <b>1.27e-17</b> | <b>0.897(76755)</b> | <b>0.891(243650)</b> | <b>0.103</b> | <b>0.012</b> |     |

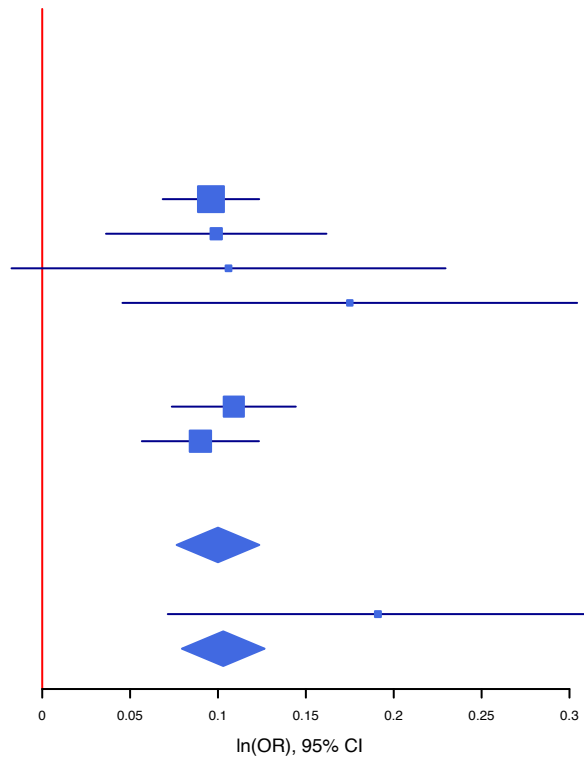

rs778371

A/G 2:233743109  
--- het\_P: 0.211 het\_I: 35.7

|                                                    | ngt      | info        | p_value        | f_ca(n)             | f_co(n)              | ln(OR)        | STDerr       |
|----------------------------------------------------|----------|-------------|----------------|---------------------|----------------------|---------------|--------------|
| PGC_SCZ wave3 eur only                             | 7        | 0.99        | 1.49e-17       | 0.699(53386)        | 0.714(77258)         | -0.081        | 0.01         |
| PGC_SCZ wave3 asn only                             | 0        | 0.95        | 0.469          | 0.884(14004)        | 0.886(16757)         | -0.02         | 0.027        |
| PGC_SCZ afram only                                 | -        | 1.03        | 0.621          | -(6152)             | 0.758(3918)          | -0.017        | 0.034        |
| PGC_SCZ latino only                                | -        | 0.98        | 0.485          | -(1234)             | 0.684(3090)          | -0.038        | 0.054        |
| PGC_SCZ wave2 only                                 | 0        | 1.00        | 6.38e-11       | 0.707(34850)        | 0.715(44347)         | -0.078        | 0.012        |
| PGC_SCZ wave3 (excl. wave2)                        | 7        | 0.99        | 6.39e-07       | 0.751(39926)        | 0.756(56676)         | -0.06         | 0.012        |
| <b>PGC_SCZ wave3 (incl. wave2)</b>                 | <b>7</b> | <b>0.99</b> | <b>2.8e-16</b> | <b>0.734(74776)</b> | <b>0.741(101023)</b> | <b>-0.07</b>  | <b>0.008</b> |
| Decode – Replication                               | -        | 1.00        | 0.0092         | 0.709(1979)         | 0.705(142627)        | -0.107        | 0.041        |
| <b>PGC_SCZ wave3 (incl. wave2 and replication)</b> | <b>7</b> | <b>1.00</b> | <b>1.4e-17</b> | <b>0.733(76755)</b> | <b>0.721(243650)</b> | <b>-0.071</b> | <b>0.008</b> |

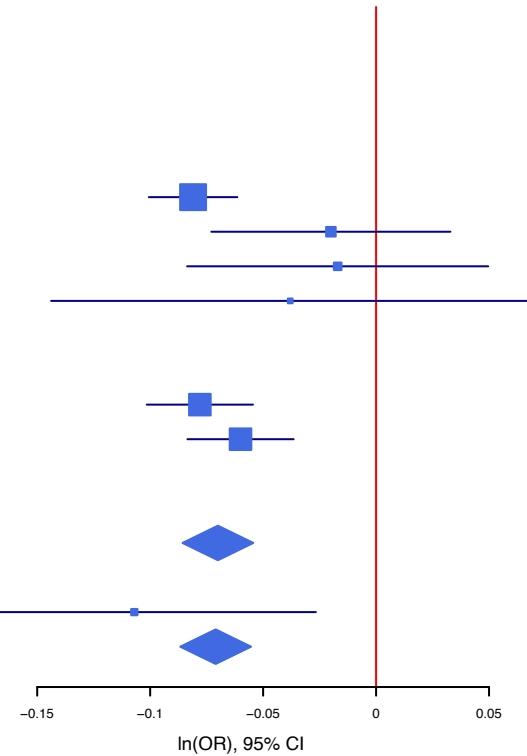

|                                                    | G/A      |             | 11:113370758    |                     | het_P:               | 0.459        | het_I:       | 0.0 |
|----------------------------------------------------|----------|-------------|-----------------|---------------------|----------------------|--------------|--------------|-----|
|                                                    | ngt      | info        | p_value         | f_ca(n)             |                      |              |              |     |
| PGC_SCZ wave3 eur only                             | 0        | 1.00        | 2.95e-14        | 0.659(53386)        | 0.647(77258)         | 0.069        | 0.009        |     |
| PGC_SCZ wave3 asn only                             | 0        | 0.94        | 0.193           | 0.954(14004)        | 0.954(16757)         | 0.058        | 0.045        |     |
| PGC_SCZ afram only                                 | -        | 0.98        | 0.677           | -(6152)             | 0.877(3918)          | 0.019        | 0.045        |     |
| PGC_SCZ latino only                                | -        | 1.02        | 0.0699          | -(1234)             | 0.74(3090)           | 0.103        | 0.057        |     |
| PGC_SCZ wave2 only                                 | 0        | 1.00        | 1.2e-08         | 0.683(34850)        | 0.663(44347)         | 0.066        | 0.012        |     |
| PGC_SCZ wave3 (excl. wave2)                        | 0        | 0.99        | 7.86e-08        | 0.78(39926)         | 0.758(56676)         | 0.069        | 0.013        |     |
| <b>PGC_SCZ wave3 (incl. wave2)</b>                 | <b>0</b> | <b>0.99</b> | <b>5.33e-15</b> | <b>0.741(74776)</b> | <b>0.722(101023)</b> | <b>0.067</b> | <b>0.009</b> |     |
| Decode – Replication                               | -        | 1.00        | 0.00188         | 0.627(1979)         | 0.641(142627)        | 0.123        | 0.04         |     |
| <b>PGC_SCZ wave3 (incl. wave2 and replication)</b> | <b>0</b> | <b>1.00</b> | <b>8.04e-17</b> | <b>0.739(76755)</b> | <b>0.677(243650)</b> | <b>0.07</b>  | <b>0.008</b> |     |

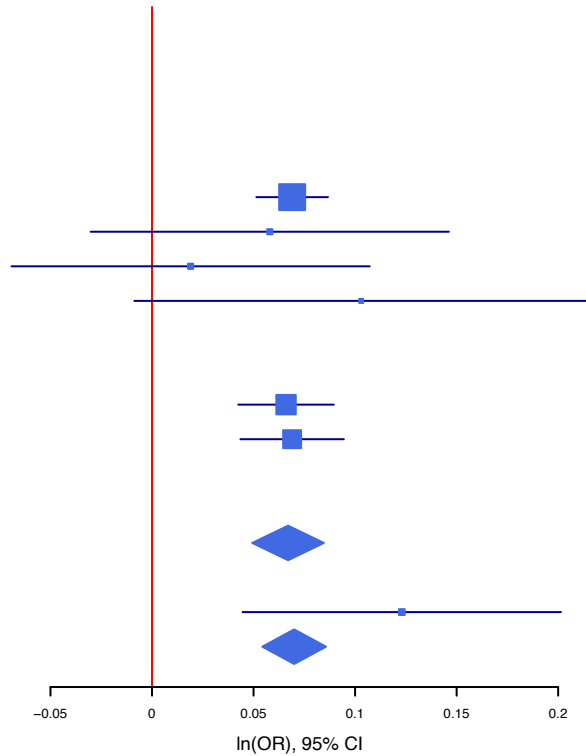

| rs35274762                                         | T/C      |             | 7:86412221      |                     |                      |              |              |
|----------------------------------------------------|----------|-------------|-----------------|---------------------|----------------------|--------------|--------------|
|                                                    | +++      | het_P:      | 0.812           | het_I:              | 0.0                  |              |              |
|                                                    | ngt      | info        | p_value         | f_ca(n)             | f_co(n)              | ln(OR)       | STDerr       |
| PGC_SCZ wave3 eur only                             | 1        | 0.99        | 2.66e-15        | 0.883(53386)        | 0.87(77258)          | 0.105        | 0.013        |
| PGC_SCZ wave3 asn only                             | 0        | 0.95        | 0.0117          | 0.938(14004)        | 0.932(16757)         | 0.09         | 0.036        |
| PGC_SCZ afram only                                 | -        | 0.98        | 0.618           | -(6152)             | 0.975(3918)          | 0.048        | 0.095        |
| PGC_SCZ latino only                                | -        | 0.98        | 0.23            | -(1234)             | 0.947(3090)          | 0.135        | 0.112        |
| PGC_SCZ wave2 only                                 | 0        | 0.99        | 7.73e-11        | 0.885(34850)        | 0.871(44347)         | 0.108        | 0.017        |
| PGC_SCZ wave3 (excl. wave2)                        | 1        | 0.98        | 1.23e-07        | 0.927(39926)        | 0.912(56676)         | 0.095        | 0.018        |
| <b>PGC_SCZ wave3 (incl. wave2)</b>                 | <b>1</b> | <b>0.98</b> | <b>5.91e-17</b> | <b>0.91(74776)</b>  | <b>0.896(101023)</b> | <b>0.102</b> | <b>0.012</b> |
| Decode – Replication                               | -        | 1.00        | 0.664           | 0.869(1979)         | 0.872(142627)        | 0.024        | 0.056        |
| <b>PGC_SCZ wave3 (incl. wave2 and replication)</b> | <b>1</b> | <b>0.99</b> | <b>1.18e-16</b> | <b>0.909(76755)</b> | <b>0.883(243650)</b> | <b>0.099</b> | <b>0.012</b> |

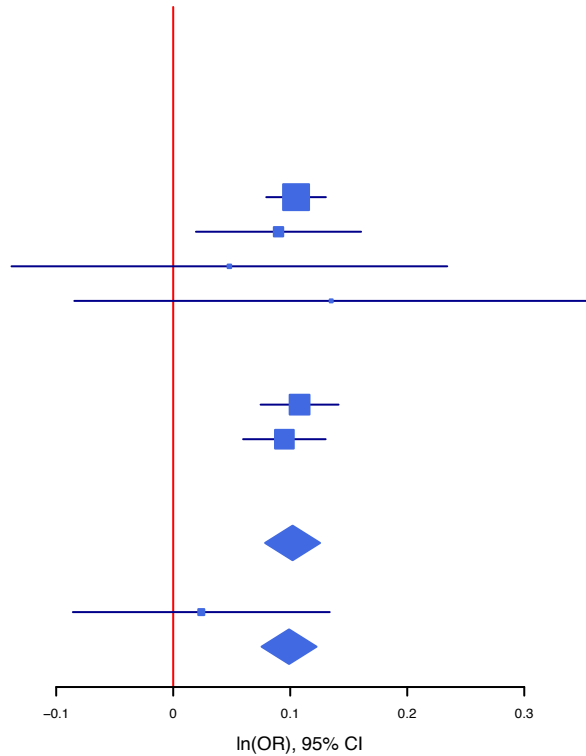

| rs1006945                                          | G/T       |             | 20:37458009     |                     | het_P:               | 0.209        | het_I:       | 36.1 |
|----------------------------------------------------|-----------|-------------|-----------------|---------------------|----------------------|--------------|--------------|------|
|                                                    | ngt       | info        | p_value         | f_ca(n)             |                      |              |              |      |
| PGC_SCZ wave3 eur only                             | 65        | 1.00        | 3.74e-14        | 0.45(53386)         | 0.464(77258)         | -0.065       | 0.009        |      |
| PGC_SCZ wave3 asn only                             | 9         | 0.99        | 0.0643          | 0.424(14004)        | 0.435(16757)         | -0.032       | 0.017        |      |
| PGC_SCZ afram only                                 | -         | 0.98        | 0.0746          | -(6152)             | 0.479(3918)          | -0.052       | 0.029        |      |
| PGC_SCZ latino only                                | -         | 1.00        | 0.00326         | -(1234)             | 0.447(3090)          | -0.147       | 0.05         |      |
| PGC_SCZ wave2 only                                 | 29        | 1.00        | 4.29e-06        | 0.445(34850)        | 0.458(44347)         | -0.05        | 0.011        |      |
| PGC_SCZ wave3 (excl. wave2)                        | 45        | 0.99        | 7.51e-12        | 0.451(39926)        | 0.46(56676)          | -0.069       | 0.01         |      |
| <b>PGC_SCZ wave3 (incl. wave2)</b>                 | <b>74</b> | <b>1.00</b> | <b>3.3e-16</b>  | <b>0.449(74776)</b> | <b>0.46(101023)</b>  | <b>-0.06</b> | <b>0.007</b> |      |
| Decode – Replication                               | -         | 1.00        | 0.12            | 0.454(1979)         | 0.484(142627)        | -0.059       | 0.038        |      |
| <b>PGC_SCZ wave3 (incl. wave2 and replication)</b> | <b>74</b> | <b>1.00</b> | <b>1.35e-16</b> | <b>0.449(76755)</b> | <b>0.474(243650)</b> | <b>-0.06</b> | <b>0.007</b> |      |

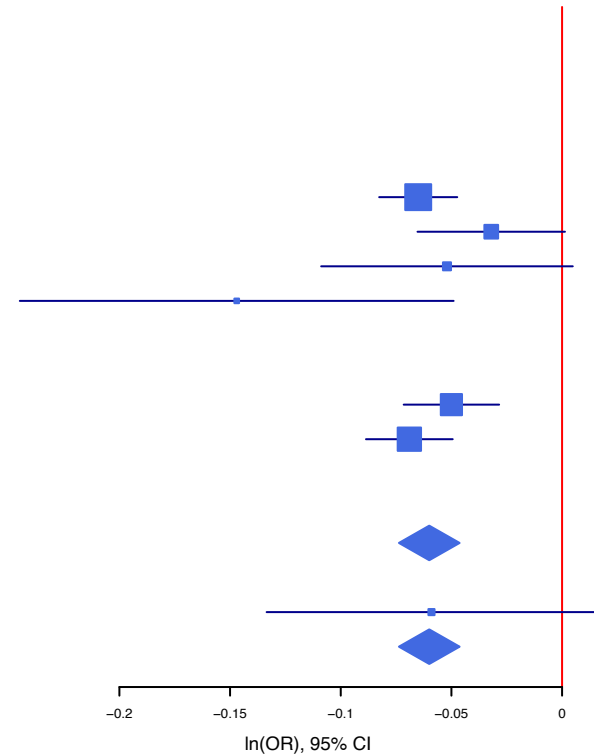

rs3813567                    G/A                    15:78934551  
 +++                    het\_P:                    0.779    het\_I:                    0.0

|                                                    | ngt      | info        | p_value         | f_ca(n)             | f_co(n)              | ln(OR)        | STDerr       |
|----------------------------------------------------|----------|-------------|-----------------|---------------------|----------------------|---------------|--------------|
| PGC_SCZ wave3 eur only                             | 2        | 0.98        | 1.21e-12        | 0.202(53386)        | 0.213(77258)         | -0.076        | 0.011        |
| PGC_SCZ wave3 asn only                             | 0        | 0.88        | 0.00415         | 0.409(14004)        | 0.421(16757)         | -0.053        | 0.018        |
| PGC_SCZ afram only                                 | -        | 1.00        | 0.0803          | -(6152)             | 0.209(3918)          | -0.063        | 0.036        |
| PGC_SCZ latino only                                | -        | 1.02        | 0.0399          | -(1234)             | 0.455(3090)          | -0.105        | 0.051        |
| PGC_SCZ wave2 only                                 | 1        | 0.98        | 2.39e-09        | 0.213(34850)        | 0.221(44347)         | -0.08         | 0.013        |
| PGC_SCZ wave3 (excl. wave2)                        | 1        | 0.97        | 5.81e-08        | 0.3(39926)          | 0.293(56676)         | -0.064        | 0.012        |
| <b>PGC_SCZ wave3 (incl. wave2)</b>                 | <b>2</b> | <b>0.97</b> | <b>1.42e-15</b> | <b>0.266(74776)</b> | <b>0.265(101023)</b> | <b>-0.071</b> | <b>0.009</b> |
| Decode – Replication                               | -        | 1.00        | 0.0159          | 0.23(1979)          | 0.218(142627)        | -0.114        | 0.047        |
| <b>PGC_SCZ wave3 (incl. wave2 and replication)</b> | <b>2</b> | <b>0.99</b> | <b>1.41e-16</b> | <b>0.265(76755)</b> | <b>0.239(243650)</b> | <b>-0.072</b> | <b>0.009</b> |

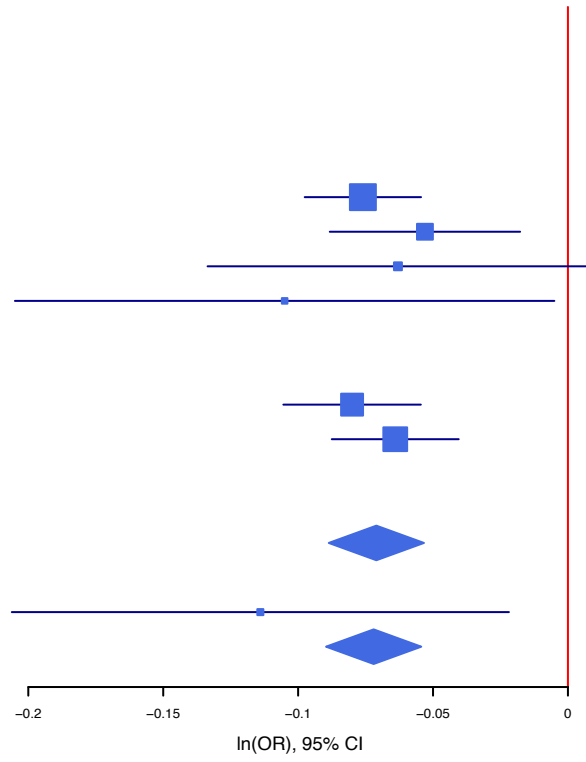



rs4766428 C/T 12:110723245  
 ++- het\_P: 0.087 het\_I: 59.1

|                                                    | ngt       | info        | p_value         | f_ca(n)             | f_co(n)              | ln(OR)        | STDerr       |
|----------------------------------------------------|-----------|-------------|-----------------|---------------------|----------------------|---------------|--------------|
| PGC_SCZ wave3 eur only                             | 33        | 0.94        | 3.93e-17        | 0.539(53386)        | 0.559(77258)         | -0.075        | 0.009        |
| PGC_SCZ wave3 asn only                             | 3         | 0.72        | 0.157           | 0.136(14004)        | 0.147(16757)         | -0.041        | 0.029        |
| PGC_SCZ afram only                                 | -         | 0.98        | 0.181           | -(6152)             | 0.773(3918)          | -0.048        | 0.036        |
| PGC_SCZ latino only                                | -         | 0.99        | 0.463           | -(1234)             | 0.527(3090)          | 0.037         | 0.05         |
| PGC_SCZ wave2 only                                 | 3         | 0.93        | 4.63e-10        | 0.518(34850)        | 0.548(44347)         | -0.071        | 0.011        |
| PGC_SCZ wave3 (excl. wave2)                        | 33        | 0.91        | 3.57e-08        | 0.492(39926)        | 0.496(56676)         | -0.065        | 0.012        |
| <b>PGC_SCZ wave3 (incl. wave2)</b>                 | <b>36</b> | <b>0.92</b> | <b>8.11e-17</b> | <b>0.503(74776)</b> | <b>0.516(101023)</b> | <b>-0.068</b> | <b>0.008</b> |
| Decode – Replication                               | -         | 1.00        | 0.489           | 0.533(1979)         | 0.546(142627)        | -0.026        | 0.038        |
| <b>PGC_SCZ wave3 (incl. wave2 and replication)</b> | <b>36</b> | <b>0.96</b> | <b>1.56e-16</b> | <b>0.504(76755)</b> | <b>0.533(243650)</b> | <b>-0.066</b> | <b>0.008</b> |

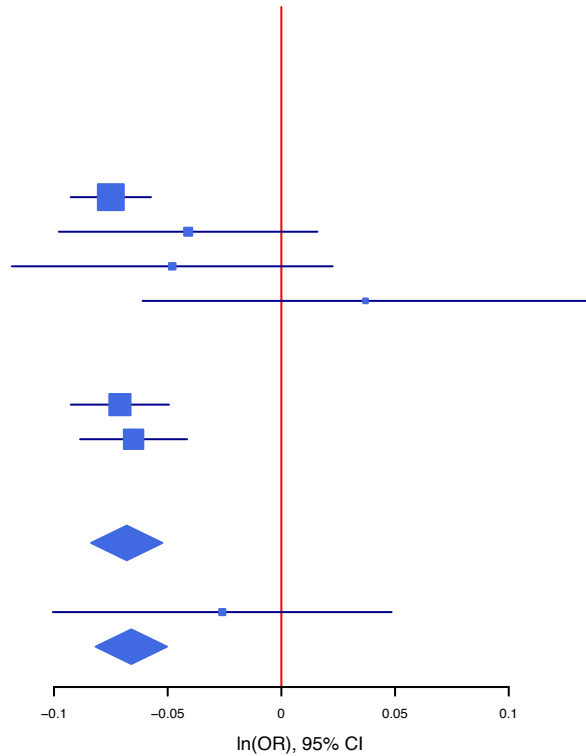

| rs2970610                                          | T/C      |             | 1:44097530      |                     |                      |              |              |
|----------------------------------------------------|----------|-------------|-----------------|---------------------|----------------------|--------------|--------------|
|                                                    | +++      | het_P:      | 0.303           | het_I:              | 16.1                 |              |              |
|                                                    | ngt      | info        | p_value         | f_ca(n)             | f_co(n)              | ln(OR)       | STDerr       |
| PGC_SCZ wave3 eur only                             | 1        | 1.00        | 3.16e-12        | 0.347(53386)        | 0.33(77258)          | 0.063        | 0.009        |
| PGC_SCZ wave3 asn only                             | 0        | 1.01        | 6.07e-06        | 0.311(14004)        | 0.288(16757)         | 0.084        | 0.018        |
| PGC_SCZ afram only                                 | -        | 0.95        | 0.408           | -(6152)             | 0.74(3918)           | 0.029        | 0.035        |
| PGC_SCZ latino only                                | -        | 0.98        | 0.865           | -(1234)             | 0.547(3090)          | 0.009        | 0.05         |
| PGC_SCZ wave2 only                                 | 1        | 1.00        | 1.17e-07        | 0.341(34850)        | 0.326(44347)         | 0.061        | 0.012        |
| PGC_SCZ wave3 (excl. wave2)                        | 0        | 0.99        | 5.54e-10        | 0.459(39926)        | 0.417(56676)         | 0.066        | 0.011        |
| <b>PGC_SCZ wave3 (incl. wave2)</b>                 | <b>1</b> | <b>0.99</b> | <b>2.51e-16</b> | <b>0.412(74776)</b> | <b>0.382(101023)</b> | <b>0.064</b> | <b>0.008</b> |
| Decode – Replication                               | -        | 1.00        | 0.681           | 0.354(1979)         | 0.362(142627)        | 0.017        | 0.041        |
| <b>PGC_SCZ wave3 (incl. wave2 and replication)</b> | <b>1</b> | <b>1.00</b> | <b>4.46e-16</b> | <b>0.411(76755)</b> | <b>0.371(243650)</b> | <b>0.062</b> | <b>0.008</b> |

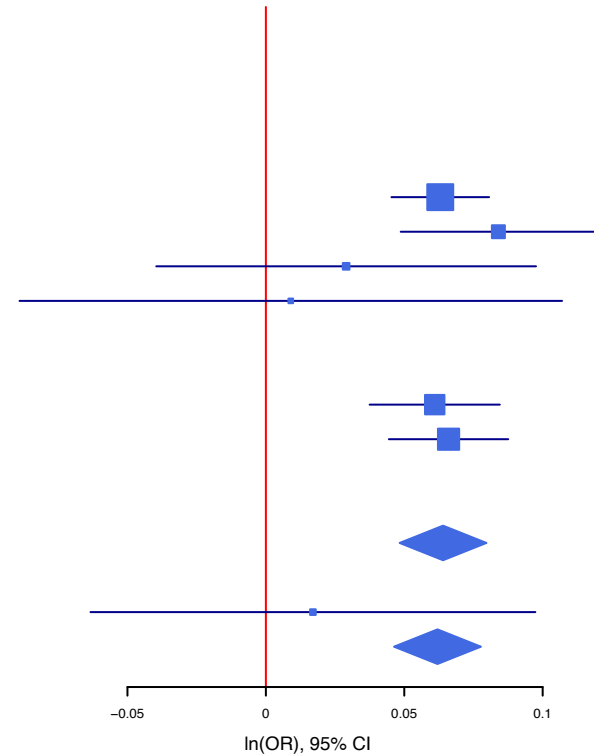

rs11680723

C/G  
 +-  
 2:200810957  
 het\_P: 0.501 het\_I: 0.0

|                                                    | ngt      | info        | p_value         | f_ca(n)             | f_co(n)              | ln(OR)        | STDerr      |
|----------------------------------------------------|----------|-------------|-----------------|---------------------|----------------------|---------------|-------------|
| PGC_SCZ wave3 eur only                             | 1        | 0.99        | 2.05e-14        | 0.816(53386)        | 0.828(77258)         | -0.086        | 0.011       |
| PGC_SCZ wave3 asn only                             | 0        | 0.96        | 0.000873        | 0.845(14004)        | 0.855(16757)         | -0.081        | 0.024       |
| PGC_SCZ afram only                                 | -        | 0.90        | 0.905           | -(6152)             | 0.963(3918)          | 0.01          | 0.083       |
| PGC_SCZ latino only                                | -        | 0.98        | 0.25            | -(1234)             | 0.929(3090)          | -0.11         | 0.096       |
| PGC_SCZ wave2 only                                 | 1        | 1.00        | 5.86e-12        | 0.815(34850)        | 0.827(44347)         | -0.098        | 0.014       |
| PGC_SCZ wave3 (excl. wave2)                        | 0        | 0.96        | 1.04e-06        | 0.876(39926)        | 0.87(56676)          | -0.071        | 0.014       |
| <b>PGC_SCZ wave3 (incl. wave2)</b>                 | <b>1</b> | <b>0.98</b> | <b>1.05e-16</b> | <b>0.852(74776)</b> | <b>0.854(101023)</b> | <b>-0.084</b> | <b>0.01</b> |
| Decode - Replication                               | -        | 1.00        | 0.939           | 0.838(1979)         | 0.835(142627)        | -0.004        | 0.051       |
| <b>PGC_SCZ wave3 (incl. wave2 and replication)</b> | <b>1</b> | <b>0.99</b> | <b>4.71e-16</b> | <b>0.852(76755)</b> | <b>0.844(243650)</b> | <b>-0.081</b> | <b>0.01</b> |

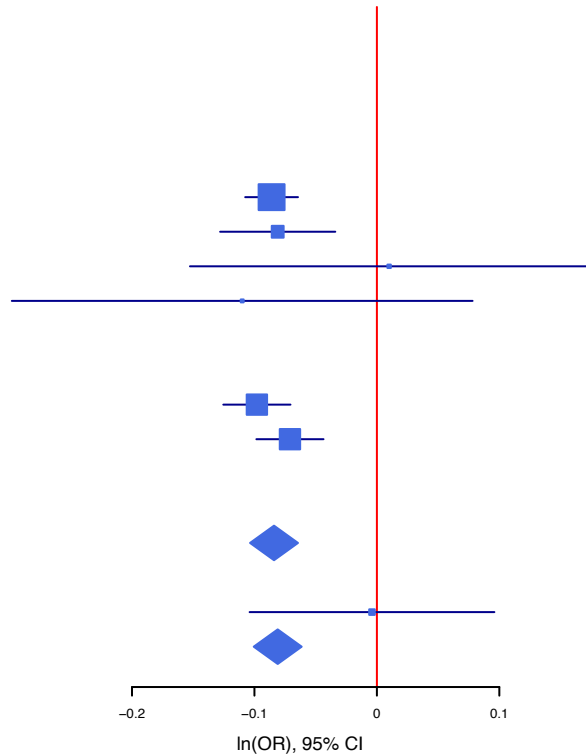

rs55858161 C/T 18:77653508  
 +?? het\_P: 1.0 het\_I: 0.0

|                                                    | ngt      | info        | p_value         | f_ca(n)             | f_co(n)              | ln(OR)        | STDerr       |
|----------------------------------------------------|----------|-------------|-----------------|---------------------|----------------------|---------------|--------------|
| PGC_SCZ wave3 eur only                             | 4        | 0.98        | 1.01e-10        | 0.641(53386)        | 0.652(77258)         | -0.059        | 0.009        |
| PGC_SCZ wave3 asn only                             | 0        | 0.96        | 3e-07           | 0.534(14004)        | 0.556(16757)         | -0.089        | 0.017        |
| PGC_SCZ wave2 only                                 | 0        | 0.98        | 0.001           | 0.639(34850)        | 0.651(44347)         | -0.038        | 0.011        |
| PGC_SCZ wave3 (excl. wave2)                        | 4        | 0.97        | 3.5e-16         | 0.598(39926)        | 0.62(56676)          | -0.093        | 0.011        |
| <b>PGC_SCZ wave3 (incl. wave2)</b>                 | <b>4</b> | <b>0.97</b> | <b>7.55e-16</b> | <b>0.619(74776)</b> | <b>0.635(101023)</b> | <b>-0.065</b> | <b>0.008</b> |
| Decode - Replication                               | -        | 1.00        | 0.273           | 0.671(1979)         | 0.66(142627)         | -0.044        | 0.04         |
| <b>PGC_SCZ wave3 (incl. wave2 and replication)</b> | <b>4</b> | <b>0.99</b> | <b>4.74e-16</b> | <b>0.62(76755)</b>  | <b>0.65(243650)</b>  | <b>-0.064</b> | <b>0.008</b> |

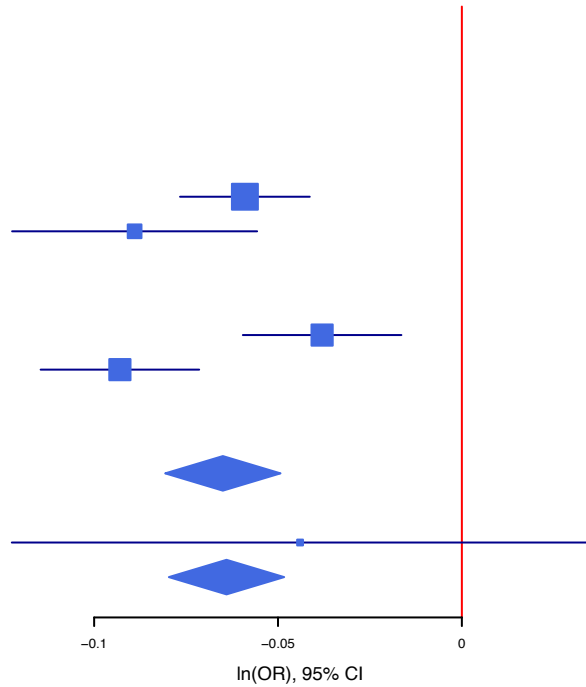

| rs9925915                                          | G/C      |             | 16:29993686     |                     |                      |              |              |
|----------------------------------------------------|----------|-------------|-----------------|---------------------|----------------------|--------------|--------------|
|                                                    | ---      |             | het_P:          | 0.278               | het_I:               | 21.9         |              |
|                                                    | ngt      | info        | p_value         | f_ca(n)             | f_co(n)              | ln(OR)       | STDerr       |
| PGC_SCZ wave3 eur only                             | 0        | 1.00        | 3.4e-14         | 0.57(53386)         | 0.555(77258)         | 0.066        | 0.009        |
| PGC_SCZ wave3 asn only                             | 0        | 1.00        | 0.0603          | 0.618(14004)        | 0.602(16757)         | 0.033        | 0.018        |
| PGC_SCZ afram only                                 | -        | 0.96        | 0.674           | -(6152)             | 0.584(3918)          | 0.013        | 0.03         |
| PGC_SCZ latino only                                | -        | 0.98        | 0.102           | -(1234)             | 0.662(3090)          | 0.087        | 0.053        |
| PGC_SCZ wave2 only                                 | 0        | 1.00        | 3.92e-10        | 0.571(34850)        | 0.554(44347)         | 0.068        | 0.011        |
| PGC_SCZ wave3 (excl. wave2)                        | 0        | 0.99        | 3.9e-06         | 0.603(39926)        | 0.587(56676)         | 0.047        | 0.01         |
| <b>PGC_SCZ wave3 (incl. wave2)</b>                 | <b>0</b> | <b>0.99</b> | <b>2.51e-14</b> | <b>0.59(74776)</b>  | <b>0.574(101023)</b> | <b>0.057</b> | <b>0.008</b> |
| Decode – Replication                               | -        | 1.00        | 0.000666        | 0.563(1979)         | 0.556(142627)        | 0.13         | 0.038        |
| <b>PGC_SCZ wave3 (incl. wave2 and replication)</b> | <b>0</b> | <b>1.00</b> | <b>4.85e-16</b> | <b>0.589(76755)</b> | <b>0.564(243650)</b> | <b>0.06</b>  | <b>0.007</b> |

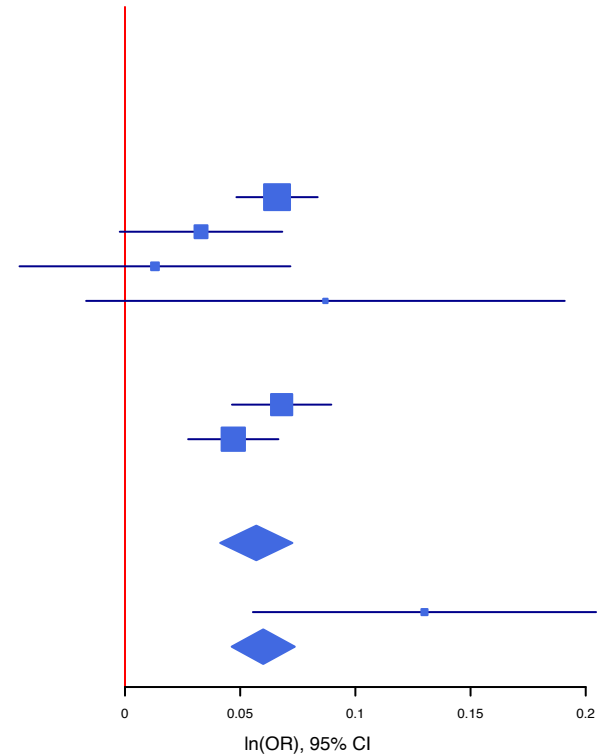

| rs8101499                                          | A/G      |             | 19:19476984     |                     | het_P:               | 0.742        | het_I:       | 0.0 |
|----------------------------------------------------|----------|-------------|-----------------|---------------------|----------------------|--------------|--------------|-----|
|                                                    | ngt      | info        | p_value         | f_ca(n)             |                      |              |              |     |
| PGC_SCZ wave3 eur only                             | 0        | 0.99        | 1.85e-15        | 0.366(53386)        | 0.349(77258)         | 0.072        | 0.009        |     |
| PGC_SCZ wave3 asn only                             | 0        | 0.97        | 0.736           | 0.289(14004)        | 0.289(16757)         | 0.006        | 0.019        |     |
| PGC_SCZ afram only                                 | -        | 0.98        | 0.0249          | -(6152)             | 0.514(3918)          | 0.066        | 0.03         |     |
| PGC_SCZ latino only                                | -        | 0.98        | 0.667           | -(1234)             | 0.428(3090)          | 0.022        | 0.051        |     |
| PGC_SCZ wave2 only                                 | 0        | 0.99        | 1.56e-07        | 0.359(34850)        | 0.345(44347)         | 0.06         | 0.011        |     |
| PGC_SCZ wave3 (excl. wave2)                        | 0        | 0.98        | 2.81e-08        | 0.393(39926)        | 0.375(56676)         | 0.059        | 0.011        |     |
| <b>PGC_SCZ wave3 (incl. wave2)</b>                 | <b>0</b> | <b>0.99</b> | <b>1.77e-14</b> | <b>0.379(74776)</b> | <b>0.363(101023)</b> | <b>0.059</b> | <b>0.008</b> |     |
| Decode – Replication                               | -        | 1.00        | 0.00763         | 0.332(1979)         | 0.326(142627)        | 0.105        | 0.039        |     |
| <b>PGC_SCZ wave3 (incl. wave2 and replication)</b> | <b>0</b> | <b>0.99</b> | <b>7.74e-16</b> | <b>0.378(76755)</b> | <b>0.343(243650)</b> | <b>0.061</b> | <b>0.008</b> |     |

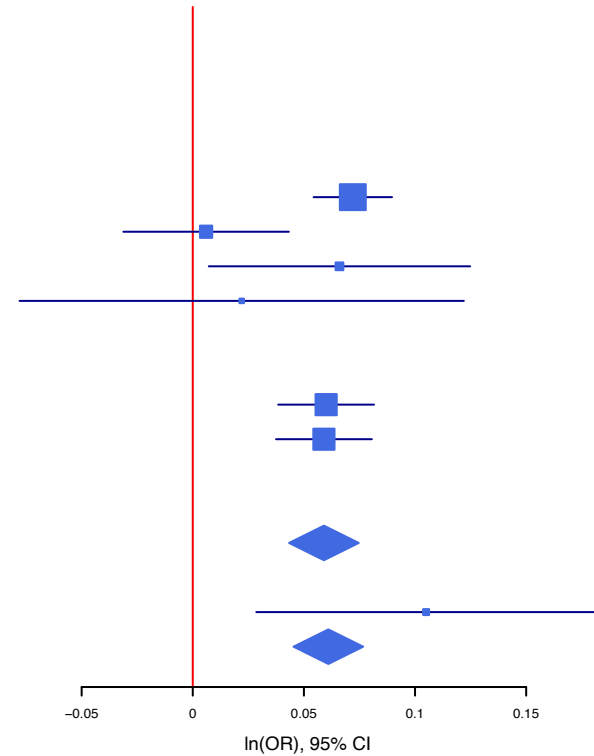

rs12498839                      G/A                      4:176731401  
 +++                      het\_P:                      0.916    het\_I:                      0.0

|                                                    | ngt      | info        | p_value         | f_ca(n)             | f_co(n)              | ln(OR)        | STDerr       |
|----------------------------------------------------|----------|-------------|-----------------|---------------------|----------------------|---------------|--------------|
| PGC_SCZ wave3 eur only                             | 4        | 0.98        | 7.9e-11         | 0.937(53386)        | 0.941(77258)         | -0.119        | 0.018        |
| PGC_SCZ wave3 asn only                             | 0        | 0.94        | 0.000262        | 0.898(14004)        | 0.906(16757)         | -0.106        | 0.029        |
| PGC_SCZ afram only                                 | -        | 0.98        | 0.0548          | -(6152)             | 0.95(3918)           | -0.132        | 0.069        |
| PGC_SCZ latino only                                | -        | 1.01        | 0.0707          | -(1234)             | 0.892(3090)          | -0.144        | 0.08         |
| PGC_SCZ wave2 only                                 | 0        | 0.98        | 1.07e-06        | 0.933(34850)        | 0.939(44347)         | -0.11         | 0.023        |
| PGC_SCZ wave3 (excl. wave2)                        | 4        | 0.98        | 5.13e-10        | 0.922(39926)        | 0.928(56676)         | -0.122        | 0.02         |
| <b>PGC_SCZ wave3 (incl. wave2)</b>                 | <b>4</b> | <b>0.98</b> | <b>3.24e-15</b> | <b>0.927(74776)</b> | <b>0.932(101023)</b> | <b>-0.117</b> | <b>0.015</b> |
| Decode – Replication                               | -        | 1.00        | 0.0816          | 0.957(1979)         | 0.955(142627)        | -0.15         | 0.086        |
| <b>PGC_SCZ wave3 (incl. wave2 and replication)</b> | <b>4</b> | <b>0.99</b> | <b>8.94e-16</b> | <b>0.928(76755)</b> | <b>0.945(243650)</b> | <b>-0.118</b> | <b>0.015</b> |

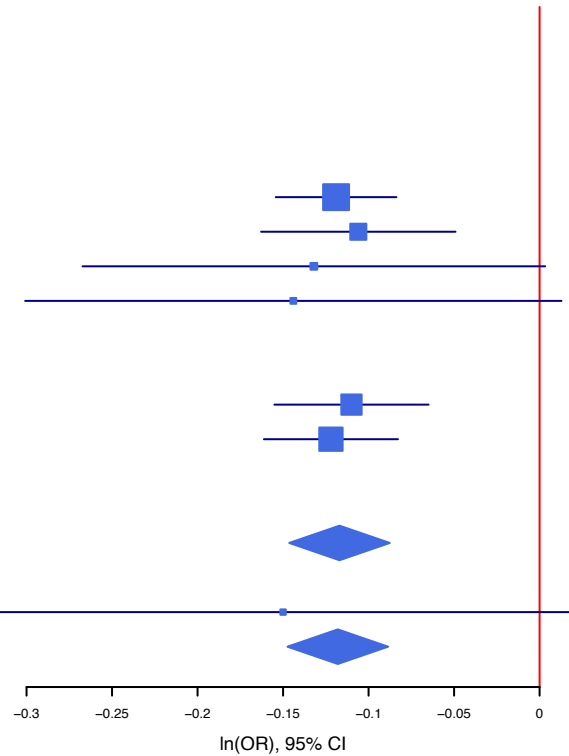

| rs56335113                                         | A/G      |             | 1:30427639      |                     | het_P:               | 0.778        | het_I:       | 0.0 |
|----------------------------------------------------|----------|-------------|-----------------|---------------------|----------------------|--------------|--------------|-----|
|                                                    | ngt      | info        | p_value         | f_ca(n)             |                      |              |              |     |
| PGC_SCZ wave3 eur only                             | 6        | 0.98        | 6.02e-12        | 0.316(53386)        | 0.303(77258)         | 0.065        | 0.009        |     |
| PGC_SCZ wave3 asn only                             | 0        | 0.95        | 0.000105        | 0.3(14004)          | 0.285(16757)         | 0.074        | 0.019        |     |
| PGC_SCZ afram only                                 | -        | 0.97        | 0.409           | -(6152)             | 0.849(3918)          | 0.036        | 0.044        |     |
| PGC_SCZ latino only                                | -        | 0.98        | 0.259           | -(1234)             | 0.482(3090)          | 0.057        | 0.05         |     |
| PGC_SCZ wave2 only                                 | 0        | 0.98        | 5.59e-09        | 0.314(34850)        | 0.299(44347)         | 0.069        | 0.012        |     |
| PGC_SCZ wave3 (excl. wave2)                        | 6        | 0.97        | 4.65e-08        | 0.452(39926)        | 0.41(56676)          | 0.062        | 0.011        |     |
| <b>PGC_SCZ wave3 (incl. wave2)</b>                 | <b>6</b> | <b>0.97</b> | <b>1.06e-15</b> | <b>0.398(74776)</b> | <b>0.368(101023)</b> | <b>0.065</b> | <b>0.008</b> |     |
| Decode – Replication                               | -        | 1.00        | 0.752           | 0.29(1979)          | 0.31(142627)         | 0.013        | 0.043        |     |
| <b>PGC_SCZ wave3 (incl. wave2 and replication)</b> | <b>6</b> | <b>0.99</b> | <b>1.46e-15</b> | <b>0.396(76755)</b> | <b>0.336(243650)</b> | <b>0.064</b> | <b>0.008</b> |     |

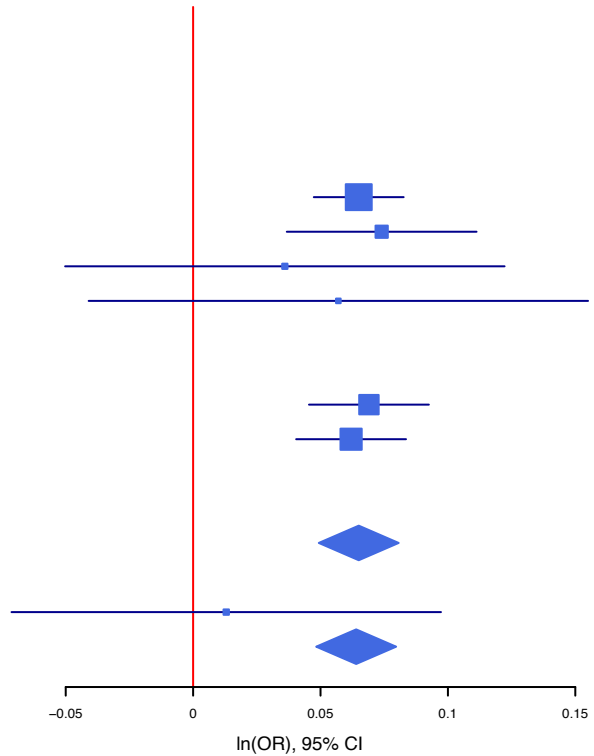



rs12471454

T/C  
---  
het\_P: 0.394 het\_I: 0.0

2:200014483

|                                                    | ngt       | info        | p_value         | f_ca(n)             | f_co(n)              | ln(OR)        | STDerr       |
|----------------------------------------------------|-----------|-------------|-----------------|---------------------|----------------------|---------------|--------------|
| PGC_SCZ wave3 eur only                             | 29        | 1.00        | 1.51e-14        | 0.407(53386)        | 0.42(77258)          | -0.067        | 0.009        |
| PGC_SCZ wave3 asn only                             | 2         | 1.00        | 0.00551         | 0.681(14004)        | 0.691(16757)         | -0.051        | 0.018        |
| PGC_SCZ afram only                                 | -         | 1.00        | 0.262           | -(6152)             | 0.65(3918)           | -0.035        | 0.031        |
| PGC_SCZ latino only                                | -         | 1.03        | 0.789           | -(1234)             | 0.481(3090)          | -0.013        | 0.049        |
| PGC_SCZ wave2 only                                 | 0         | 0.99        | 1.83e-07        | 0.42(34850)         | 0.423(44347)         | -0.058        | 0.011        |
| PGC_SCZ wave3 (excl. wave2)                        | 31        | 1.01        | 5.17e-10        | 0.533(39926)        | 0.526(56676)         | -0.064        | 0.01         |
| <b>PGC_SCZ wave3 (incl. wave2)</b>                 | <b>31</b> | <b>1.00</b> | <b>5.79e-16</b> | <b>0.489(74776)</b> | <b>0.486(101023)</b> | <b>-0.061</b> | <b>0.008</b> |
| Decode – Replication                               | -         | 1.00        | 0.754           | 0.439(1979)         | 0.442(142627)        | -0.012        | 0.039        |
| <b>PGC_SCZ wave3 (incl. wave2 and replication)</b> | <b>31</b> | <b>1.00</b> | <b>1.71e-15</b> | <b>0.488(76755)</b> | <b>0.462(243650)</b> | <b>-0.059</b> | <b>0.008</b> |

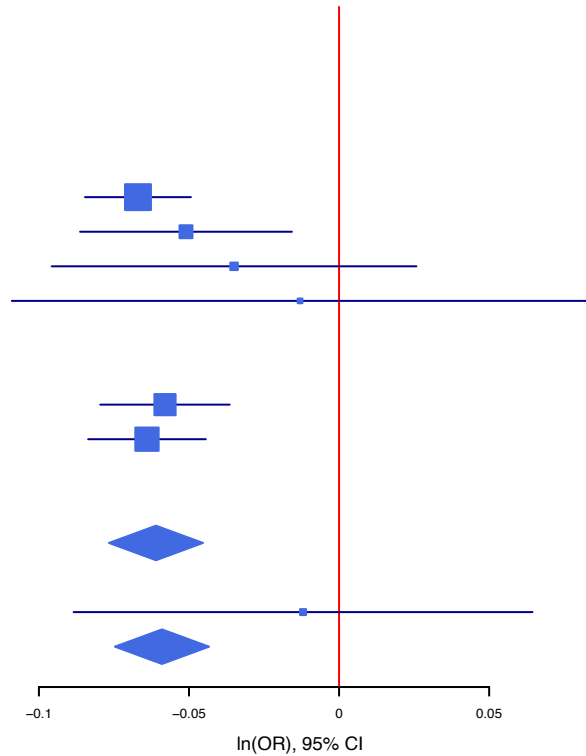

rs11587347

C/G  
---  
1:239198959  
het\_P: 0.938 het\_I: 0.0

|                                                    | ngt       | info        | p_value         | f_ca(n)             | f_co(n)              | ln(OR)        | STDerr       |
|----------------------------------------------------|-----------|-------------|-----------------|---------------------|----------------------|---------------|--------------|
| PGC_SCZ wave3 eur only                             | 24        | 0.95        | 1.53e-12        | 0.895(53386)        | 0.906(77258)         | -0.104        | 0.015        |
| PGC_SCZ wave3 asn only                             | 4         | 0.71        | 0.0318          | 0.943(14004)        | 0.946(16757)         | -0.093        | 0.044        |
| PGC_SCZ afram only                                 | -         | 0.86        | 0.538           | -(6152)             | 0.977(3918)          | -0.065        | 0.106        |
| PGC_SCZ latino only                                | -         | 0.98        | 0.136           | -(1234)             | 0.858(3090)          | -0.107        | 0.072        |
| PGC_SCZ wave2 only                                 | 1         | 0.95        | 1.79e-08        | 0.899(34850)        | 0.908(44347)         | -0.106        | 0.019        |
| PGC_SCZ wave3 (excl. wave2)                        | 27        | 0.89        | 4.6e-07         | 0.913(39926)        | 0.917(56676)         | -0.098        | 0.02         |
| <b>PGC_SCZ wave3 (incl. wave2)</b>                 | <b>28</b> | <b>0.91</b> | <b>4e-14</b>    | <b>0.908(74776)</b> | <b>0.914(101023)</b> | <b>-0.102</b> | <b>0.014</b> |
| Decode – Replication                               | -         | 1.00        | 0.0347          | 0.887(1979)         | 0.903(142627)        | -0.132        | 0.063        |
| <b>PGC_SCZ wave3 (incl. wave2 and replication)</b> | <b>28</b> | <b>0.96</b> | <b>4.08e-15</b> | <b>0.908(76755)</b> | <b>0.908(243650)</b> | <b>-0.104</b> | <b>0.013</b> |

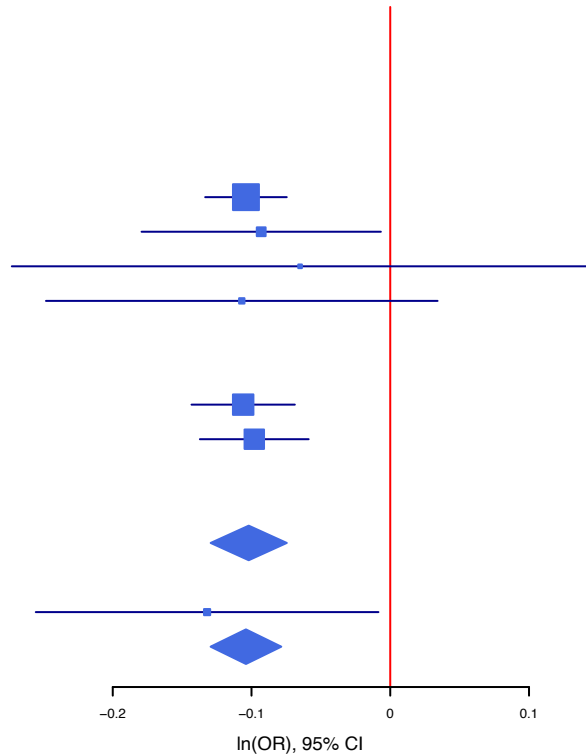

| rs61937595                                         | C/T       |             | 12:57682956     |                     | het_P:               | 0.163       | het_I:       | 44.9 |
|----------------------------------------------------|-----------|-------------|-----------------|---------------------|----------------------|-------------|--------------|------|
|                                                    | +-        |             |                 |                     |                      |             |              |      |
|                                                    | ngt       | info        | p_value         | f_ca(n)             | f_co(n)              | ln(OR)      | STDerr       |      |
| PGC_SCZ wave3 eur only                             | 30        | 0.89        | 1.15e-15        | 0.917(53386)        | 0.908(77258)         | 0.13        | 0.016        |      |
| PGC_SCZ wave3 asn only                             | 0         | 0.34        | 0.641           | 0.95(14004)         | 0.95(16757)          | -0.033      | 0.071        |      |
| PGC_SCZ afram only                                 | -         | 0.98        | 0.525           | -(6152)             | 0.984(3918)          | -0.075      | 0.117        |      |
| PGC_SCZ latino only                                | -         | 0.97        | 0.102           | -(1234)             | 0.977(3090)          | 0.279       | 0.171        |      |
| PGC_SCZ wave2 only                                 | 1         | 0.85        | 2.09e-12        | 0.917(34850)        | 0.905(44347)         | 0.146       | 0.021        |      |
| PGC_SCZ wave3 (excl. wave2)                        | 29        | 0.84        | 0.000289        | 0.95(39926)         | 0.941(56676)         | 0.086       | 0.024        |      |
| <b>PGC_SCZ wave3 (incl. wave2)</b>                 | <b>30</b> | <b>0.84</b> | <b>1.53e-14</b> | <b>0.936(74776)</b> | <b>0.926(101023)</b> | <b>0.12</b> | <b>0.016</b> |      |
| Decode – Replication                               | -         | 1.00        | 0.104           | 0.913(1979)         | 0.91(142627)         | 0.119       | 0.073        |      |
| <b>PGC_SCZ wave3 (incl. wave2 and replication)</b> | <b>30</b> | <b>0.93</b> | <b>4.18e-15</b> | <b>0.936(76755)</b> | <b>0.917(243650)</b> | <b>0.12</b> | <b>0.015</b> |      |

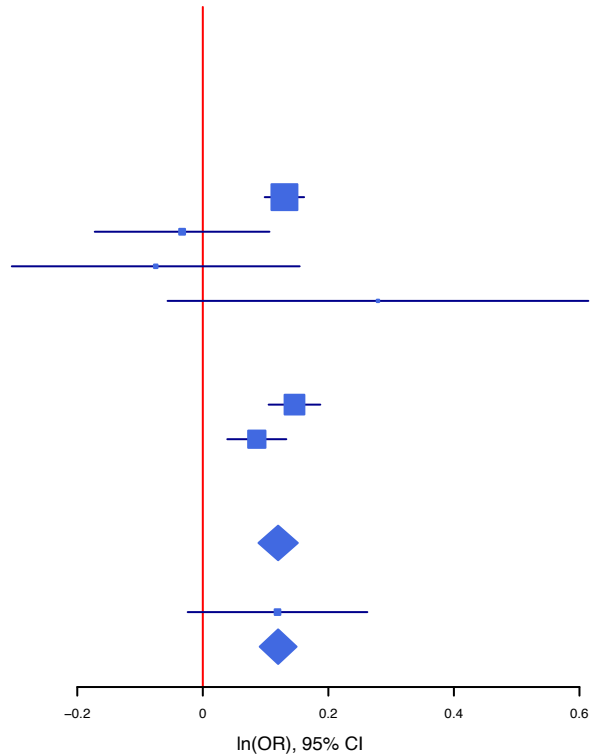

| rs11638554                                         | T/G      |             | 15:85148231     |                     | het_P:               | 0.934        | het_I:       | 0.0 |
|----------------------------------------------------|----------|-------------|-----------------|---------------------|----------------------|--------------|--------------|-----|
|                                                    | ngt      | info        | p_value         | f_ca(n)             |                      |              |              |     |
| PGC_SCZ wave3 eur only                             | 0        | 0.99        | 7.58e-12        | 0.715(53386)        | 0.701(77258)         | 0.065        | 0.01         |     |
| PGC_SCZ wave3 asn only                             | 0        | 0.95        | 0.0143          | 0.859(14004)        | 0.854(16757)         | 0.061        | 0.025        |     |
| PGC_SCZ afram only                                 | -        | 0.96        | 0.234           | -(6152)             | 0.943(3918)          | 0.078        | 0.066        |     |
| PGC_SCZ latino only                                | -        | 0.99        | 0.463           | -(1234)             | 0.798(3090)          | 0.045        | 0.062        |     |
| PGC_SCZ wave2 only                                 | 0        | 0.99        | 2.96e-10        | 0.723(34850)        | 0.703(44347)         | 0.076        | 0.012        |     |
| PGC_SCZ wave3 (excl. wave2)                        | 0        | 0.98        | 4.01e-05        | 0.809(39926)        | 0.786(56676)         | 0.052        | 0.013        |     |
| <b>PGC_SCZ wave3 (incl. wave2)</b>                 | <b>0</b> | <b>0.98</b> | <b>1.68e-13</b> | <b>0.775(74776)</b> | <b>0.754(101023)</b> | <b>0.064</b> | <b>0.009</b> |     |
| Decode – Replication                               | -        | 1.00        | 0.00294         | 0.694(1979)         | 0.708(142627)        | 0.127        | 0.043        |     |
| <b>PGC_SCZ wave3 (incl. wave2 and replication)</b> | <b>0</b> | <b>0.99</b> | <b>4.28e-15</b> | <b>0.773(76755)</b> | <b>0.728(243650)</b> | <b>0.067</b> | <b>0.008</b> |     |

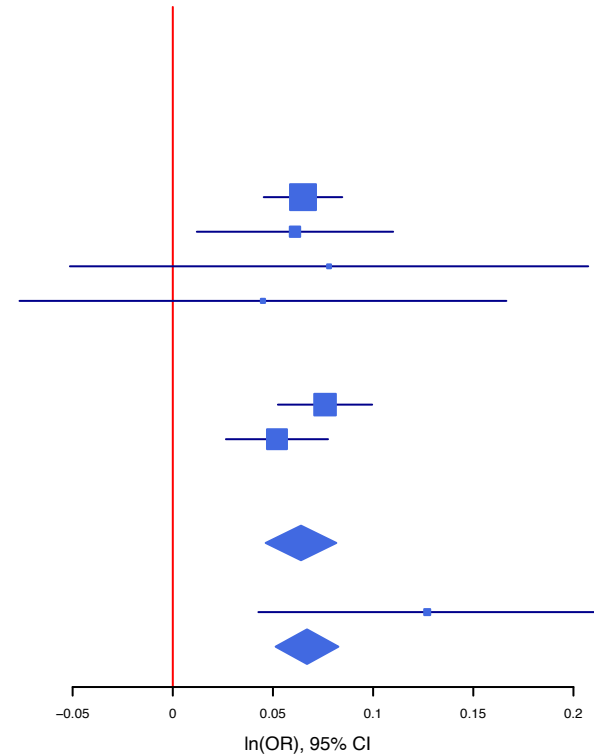

rs10873538                    T/G                    14:104255569  
 ---+                    het\_P:                    0.198    het\_I:                    38.1

|                                                    | ngt      | info        | p_value         | f_ca(n)             | f_co(n)              | ln(OR)        | STDerr       |
|----------------------------------------------------|----------|-------------|-----------------|---------------------|----------------------|---------------|--------------|
| PGC_SCZ wave3 eur only                             | 0        | 0.99        | 3.01e-13        | 0.654(53386)        | 0.666(77258)         | -0.067        | 0.009        |
| PGC_SCZ wave3 asn only                             | 0        | 0.99        | 0.00633         | 0.669(14004)        | 0.677(16757)         | -0.05         | 0.018        |
| PGC_SCZ afram only                                 | -        | 0.98        | 0.695           | -(6152)             | 0.785(3918)          | -0.014        | 0.036        |
| PGC_SCZ latino only                                | -        | 1.01        | 0.915           | -(1234)             | 0.703(3090)          | 0.006         | 0.054        |
| PGC_SCZ wave2 only                                 | 0        | 0.99        | 4.44e-11        | 0.65(34850)         | 0.664(44347)         | -0.076        | 0.012        |
| PGC_SCZ wave3 (excl. wave2)                        | 0        | 0.99        | 3.23e-05        | 0.696(39926)        | 0.693(56676)         | -0.045        | 0.011        |
| <b>PGC_SCZ wave3 (incl. wave2)</b>                 | <b>0</b> | <b>0.99</b> | <b>6.14e-14</b> | <b>0.678(74776)</b> | <b>0.682(101023)</b> | <b>-0.059</b> | <b>0.008</b> |
| Decode – Replication                               | -        | 1.00        | 0.0182          | 0.689(1979)         | 0.696(142627)        | -0.094        | 0.04         |
| <b>PGC_SCZ wave3 (incl. wave2 and replication)</b> | <b>0</b> | <b>1.00</b> | <b>4.7e-15</b>  | <b>0.678(76755)</b> | <b>0.69(243650)</b>  | <b>-0.061</b> | <b>0.008</b> |

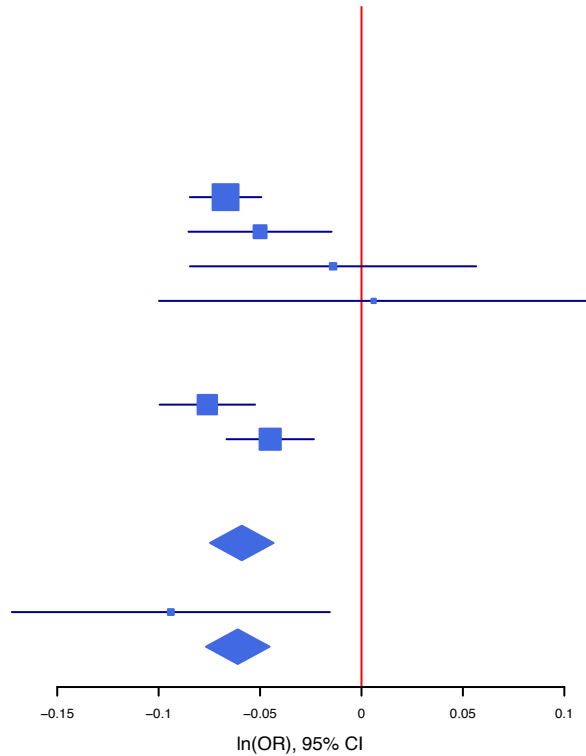

rs732381

A/T 22:40051166  
--- het\_P: 0.206 het\_I: 36.7

|                                                    | ngt       | info        | p_value         | f_ca(n)             | f_co(n)              | ln(OR)        | STDerr       |
|----------------------------------------------------|-----------|-------------|-----------------|---------------------|----------------------|---------------|--------------|
| PGC_SCZ wave3 eur only                             | 12        | 0.98        | 1.29e-10        | 0.686(53386)        | 0.699(77258)         | -0.061        | 0.009        |
| PGC_SCZ wave3 asn only                             | 1         | 0.80        | 0.00805         | 0.079(14004)        | 0.075(16757)         | -0.106        | 0.04         |
| PGC_SCZ afram only                                 | -         | 0.87        | 0.168           | -(6152)             | 0.844(3918)          | -0.061        | 0.044        |
| PGC_SCZ latino only                                | -         | 0.98        | 0.00232         | -(1234)             | 0.5(3090)            | -0.155        | 0.051        |
| PGC_SCZ wave2 only                                 | 11        | 0.97        | 2.33e-09        | 0.649(34850)        | 0.683(44347)         | -0.072        | 0.012        |
| PGC_SCZ wave3 (excl. wave2)                        | 2         | 0.92        | 7.68e-06        | 0.547(39926)        | 0.554(56676)         | -0.058        | 0.013        |
| <b>PGC_SCZ wave3 (incl. wave2)</b>                 | <b>13</b> | <b>0.94</b> | <b>1.17e-13</b> | <b>0.587(74776)</b> | <b>0.604(101023)</b> | <b>-0.066</b> | <b>0.009</b> |
| Decode - Replication                               | -         | 1.00        | 0.00652         | 0.691(1979)         | 0.691(142627)        | -0.113        | 0.042        |
| <b>PGC_SCZ wave3 (incl. wave2 and replication)</b> | <b>13</b> | <b>0.97</b> | <b>6.27e-15</b> | <b>0.589(76755)</b> | <b>0.652(243650)</b> | <b>-0.068</b> | <b>0.009</b> |

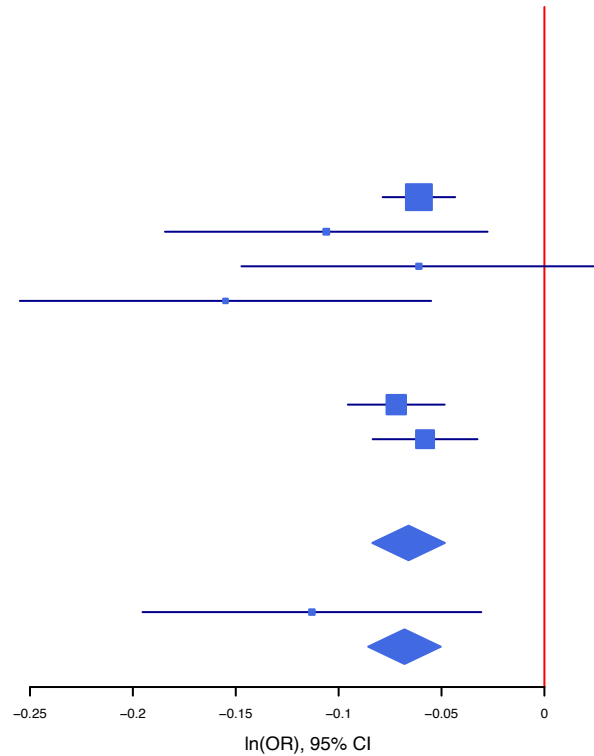

| rs7803571                                          | C/T      |             | 7:110993511     |                    |                      |              |              |
|----------------------------------------------------|----------|-------------|-----------------|--------------------|----------------------|--------------|--------------|
|                                                    | ---      |             | het_P:          | 0.782              | het_I:               | 0.0          |              |
|                                                    | ngt      | info        | p_value         | f_ca(n)            | f_co(n)              | ln(OR)       | STDerr       |
| PGC_SCZ wave3 eur only                             | 6        | 0.99        | 1.27e-12        | 0.634(53386)       | 0.622(77258)         | 0.064        | 0.009        |
| PGC_SCZ wave3 asn only                             | 0        | 0.98        | 0.0155          | 0.491(14004)       | 0.482(16757)         | 0.041        | 0.017        |
| PGC_SCZ afram only                                 | -        | 0.95        | 0.379           | -(6152)            | 0.794(3918)          | 0.033        | 0.037        |
| PGC_SCZ latino only                                | -        | 0.99        | 0.302           | -(1234)            | 0.548(3090)          | 0.052        | 0.05         |
| PGC_SCZ wave2 only                                 | 0        | 0.99        | 3.11e-10        | 0.632(34850)       | 0.62(44347)          | 0.071        | 0.011        |
| PGC_SCZ wave3 (excl. wave2)                        | 6        | 0.98        | 1.1e-05         | 0.613(39926)       | 0.604(56676)         | 0.046        | 0.01         |
| <b>PGC_SCZ wave3 (incl. wave2)</b>                 | <b>6</b> | <b>0.99</b> | <b>4.49e-14</b> | <b>0.62(74776)</b> | <b>0.611(101023)</b> | <b>0.058</b> | <b>0.008</b> |
| Decode – Replication                               | -        | 1.00        | 0.0783          | 0.6(1979)          | 0.583(142627)        | 0.07         | 0.04         |
| <b>PGC_SCZ wave3 (incl. wave2 and replication)</b> | <b>6</b> | <b>0.99</b> | <b>7.59e-15</b> | <b>0.62(76755)</b> | <b>0.595(243650)</b> | <b>0.058</b> | <b>0.008</b> |

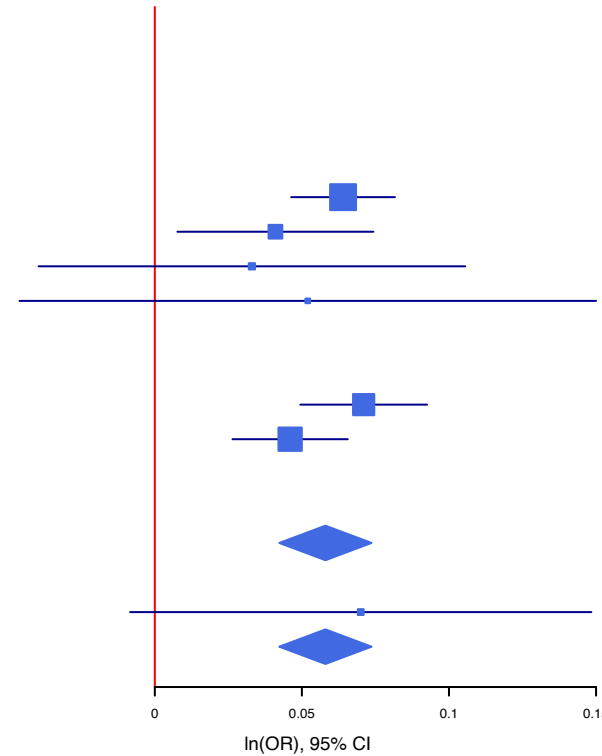

rs10935184

T/C  
3:136153468  
++  
het\_P: 0.184  
het\_I: 41.0

|                                                    | ngt      | info        | p_value         | f_ca(n)             | f_co(n)              | ln(OR)       | STDerr       |
|----------------------------------------------------|----------|-------------|-----------------|---------------------|----------------------|--------------|--------------|
| PGC_SCZ wave3 eur only                             | 2        | 1.00        | 1.61e-10        | 0.593(53386)        | 0.577(77258)         | 0.056        | 0.009        |
| PGC_SCZ wave3 asn only                             | 0        | 0.96        | 3.58e-06        | 0.203(14004)        | 0.185(16757)         | 0.102        | 0.022        |
| PGC_SCZ afram only                                 | -        | 0.97        | 0.997           | -(6152)             | 0.823(3918)          | -0.0         | 0.039        |
| PGC_SCZ latino only                                | -        | 1.06        | 0.0291          | -(1234)             | 0.38(3090)           | 0.11         | 0.051        |
| PGC_SCZ wave2 only                                 | 2        | 1.00        | 4.01e-10        | 0.569(34850)        | 0.561(44347)         | 0.069        | 0.011        |
| PGC_SCZ wave3 (excl. wave2)                        | 0        | 0.99        | 2.7e-06         | 0.511(39926)        | 0.502(56676)         | 0.052        | 0.011        |
| <b>PGC_SCZ wave3 (incl. wave2)</b>                 | <b>2</b> | <b>1.00</b> | <b>7.93e-15</b> | <b>0.534(74776)</b> | <b>0.525(101023)</b> | <b>0.061</b> | <b>0.008</b> |
| Decode – Replication                               | -        | 1.00        | 0.723           | 0.563(1979)         | 0.553(142627)        | 0.014        | 0.038        |
| <b>PGC_SCZ wave3 (incl. wave2 and replication)</b> | <b>2</b> | <b>1.00</b> | <b>1.15e-14</b> | <b>0.535(76755)</b> | <b>0.54(243650)</b>  | <b>0.059</b> | <b>0.008</b> |

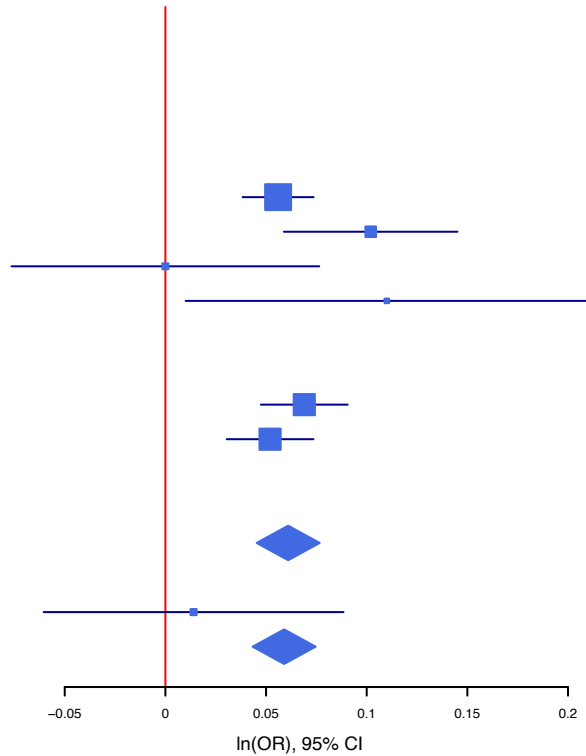



rs10035564

A/G  
+-  
5:45252500  
het\_P: 0.068 het\_I: 62.7

|                                                    | ngt       | info        | p_value        | f_ca(n)             | f_co(n)              | ln(OR)        | STDerr       |
|----------------------------------------------------|-----------|-------------|----------------|---------------------|----------------------|---------------|--------------|
| PGC_SCZ wave3 eur only                             | 8         | 0.97        | 4.38e-13       | 0.65(53386)         | 0.669(77258)         | -0.067        | 0.009        |
| PGC_SCZ wave3 asn only                             | 2         | 0.96        | 0.000825       | 0.487(14004)        | 0.502(16757)         | -0.058        | 0.017        |
| PGC_SCZ afram only                                 | -         | 0.98        | 0.835          | -(6152)             | 0.327(3918)          | 0.007         | 0.032        |
| PGC_SCZ latino only                                | -         | 0.97        | 0.694          | -(1234)             | 0.545(3090)          | -0.02         | 0.051        |
| PGC_SCZ wave2 only                                 | 7         | 0.96        | 1.25e-06       | 0.645(34850)        | 0.665(44347)         | -0.056        | 0.012        |
| PGC_SCZ wave3 (excl. wave2)                        | 3         | 0.98        | 3.45e-09       | 0.526(39926)        | 0.561(56676)         | -0.062        | 0.01         |
| <b>PGC_SCZ wave3 (incl. wave2)</b>                 | <b>10</b> | <b>0.97</b> | <b>1.7e-14</b> | <b>0.573(74776)</b> | <b>0.601(101023)</b> | <b>-0.059</b> | <b>0.008</b> |
| Decode - Replication                               | -         | 1.00        | 0.276          | 0.638(1979)         | 0.661(142627)        | -0.044        | 0.041        |
| <b>PGC_SCZ wave3 (incl. wave2 and replication)</b> | <b>10</b> | <b>0.99</b> | <b>1.4e-14</b> | <b>0.574(76755)</b> | <b>0.634(243650)</b> | <b>-0.059</b> | <b>0.008</b> |

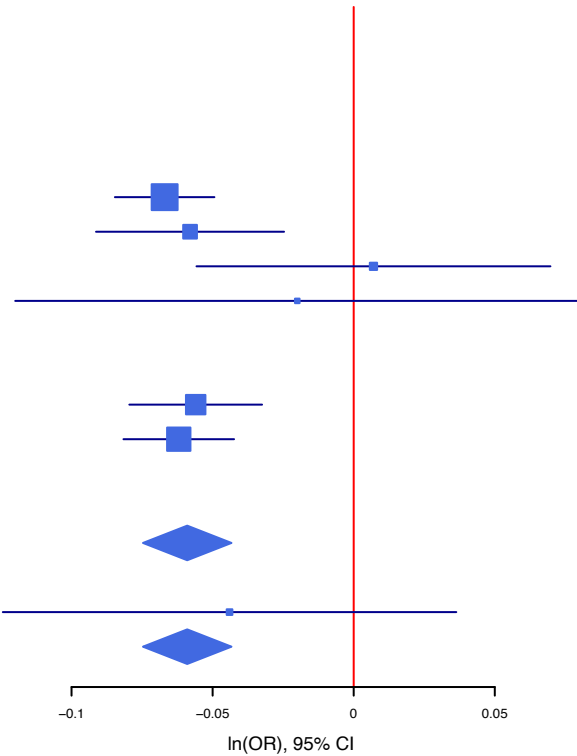

rs7251

C/G 19:50162909  
+++ het\_P: 0.119 het\_I: 53.0

|                                                    | ngt      | info        | p_value         | f_ca(n)             | f_co(n)              | ln(OR)       | STDerr       |
|----------------------------------------------------|----------|-------------|-----------------|---------------------|----------------------|--------------|--------------|
| PGC_SCZ wave3 eur only                             | 1        | 0.97        | 8.29e-12        | 0.682(53386)        | 0.672(77258)         | 0.064        | 0.009        |
| PGC_SCZ wave3 asn only                             | 1        | 0.87        | 0.00137         | 0.664(14004)        | 0.66(16757)          | 0.061        | 0.019        |
| PGC_SCZ afram only                                 | -        | 0.95        | 0.842           | -(6152)             | 0.347(3918)          | 0.006        | 0.032        |
| PGC_SCZ latino only                                | -        | 0.97        | 0.962           | -(1234)             | 0.543(3090)          | 0.002        | 0.051        |
| PGC_SCZ wave2 only                                 | 1        | 0.95        | 6.87e-06        | 0.678(34850)        | 0.673(44347)         | 0.054        | 0.012        |
| PGC_SCZ wave3 (excl. wave2)                        | 1        | 0.95        | 1.04e-08        | 0.586(39926)        | 0.599(56676)         | 0.062        | 0.011        |
| <b>PGC_SCZ wave3 (incl. wave2)</b>                 | <b>2</b> | <b>0.95</b> | <b>3.79e-13</b> | <b>0.622(74776)</b> | <b>0.628(101023)</b> | <b>0.058</b> | <b>0.008</b> |
| Decode – Replication                               | -        | 1.00        | 0.00494         | 0.642(1979)         | 0.667(142627)        | 0.112        | 0.04         |
| <b>PGC_SCZ wave3 (incl. wave2 and replication)</b> | <b>2</b> | <b>0.98</b> | <b>1.53e-14</b> | <b>0.622(76755)</b> | <b>0.649(243650)</b> | <b>0.06</b>  | <b>0.008</b> |

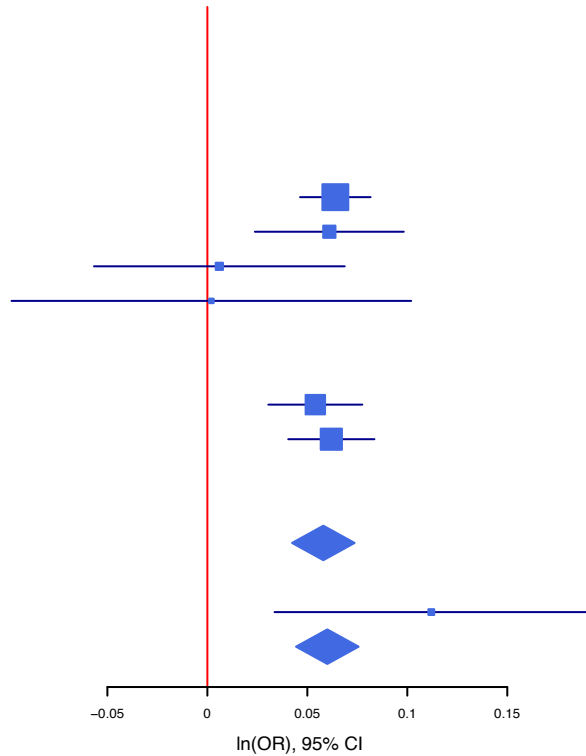

| rs11693094                                         | C/T      |             | 2:185601420     |                     | het_P:               | 0.322        | het_I:       | 11.9 |
|----------------------------------------------------|----------|-------------|-----------------|---------------------|----------------------|--------------|--------------|------|
|                                                    | ngt      | info        | p_value         | f_ca(n)             |                      |              |              |      |
| PGC_SCZ wave3 eur only                             | 1        | 0.98        | 4.29e-10        | 0.556(53386)        | 0.539(77258)         | 0.054        | 0.009        |      |
| PGC_SCZ wave3 asn only                             | 0        | 0.92        | 8.66e-05        | 0.493(14004)        | 0.477(16757)         | 0.069        | 0.018        |      |
| PGC_SCZ afram only                                 | -        | 1.00        | 0.722           | -(6152)             | 0.894(3918)          | -0.017       | 0.049        |      |
| PGC_SCZ latino only                                | -        | 0.99        | 0.261           | -(1234)             | 0.543(3090)          | 0.056        | 0.05         |      |
| PGC_SCZ wave2 only                                 | 0        | 0.98        | 1.2e-09         | 0.554(34850)        | 0.538(44347)         | 0.067        | 0.011        |      |
| PGC_SCZ wave3 (excl. wave2)                        | 1        | 0.97        | 2.18e-05        | 0.605(39926)        | 0.579(56676)         | 0.045        | 0.011        |      |
| <b>PGC_SCZ wave3 (incl. wave2)</b>                 | <b>1</b> | <b>0.98</b> | <b>3.2e-13</b>  | <b>0.585(74776)</b> | <b>0.563(101023)</b> | <b>0.056</b> | <b>0.008</b> |      |
| Decode – Replication                               | -        | 1.00        | 0.0108          | 0.56(1979)          | 0.577(142627)        | 0.097        | 0.038        |      |
| <b>PGC_SCZ wave3 (incl. wave2 and replication)</b> | <b>1</b> | <b>0.99</b> | <b>1.85e-14</b> | <b>0.584(76755)</b> | <b>0.571(243650)</b> | <b>0.057</b> | <b>0.008</b> |      |

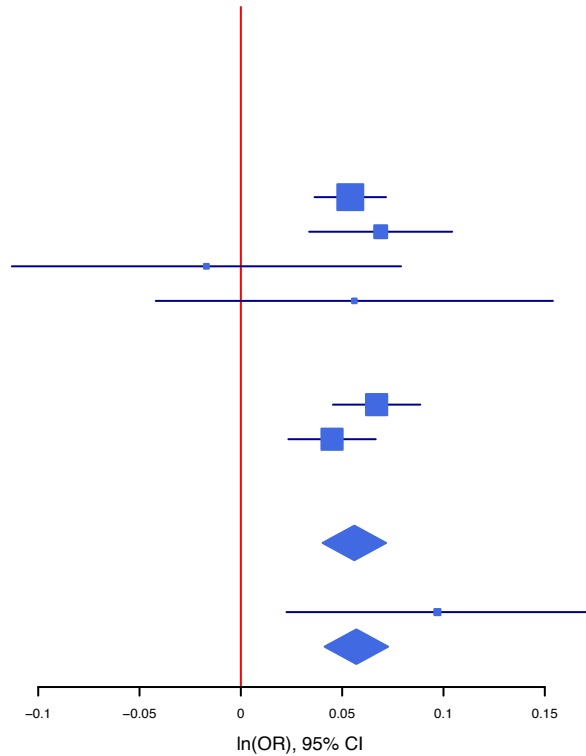

| rs4936215                                          | A/G      |             | 11:133852684    |                     | het_P:               | 0.143        | het_I:      | 48.6 |
|----------------------------------------------------|----------|-------------|-----------------|---------------------|----------------------|--------------|-------------|------|
|                                                    | ++-      |             |                 |                     |                      |              |             |      |
|                                                    | ngt      | info        | p_value         | f_ca(n)             | f_co(n)              | ln(OR)       | STDerr      |      |
| PGC_SCZ wave3 eur only                             | 5        | 0.95        | 1.87e-14        | 0.788(53386)        | 0.769(77258)         | 0.082        | 0.011       |      |
| PGC_SCZ wave3 asn only                             | 1        | 0.82        | 0.029           | 0.955(14004)        | 0.951(16757)         | 0.105        | 0.048       |      |
| PGC_SCZ afram only                                 | -        | 0.95        | 0.987           | -(6152)             | 0.944(3918)          | 0.001        | 0.065       |      |
| PGC_SCZ latino only                                | -        | 0.96        | 0.649           | -(1234)             | 0.867(3090)          | -0.033       | 0.074       |      |
| PGC_SCZ wave2 only                                 | 0        | 0.96        | 1.14e-10        | 0.793(34850)        | 0.769(44347)         | 0.087        | 0.014       |      |
| PGC_SCZ wave3 (excl. wave2)                        | 6        | 0.92        | 1.41e-05        | 0.874(39926)        | 0.852(56676)         | 0.067        | 0.016       |      |
| <b>PGC_SCZ wave3 (incl. wave2)</b>                 | <b>6</b> | <b>0.93</b> | <b>1.11e-14</b> | <b>0.841(74776)</b> | <b>0.82(101023)</b>  | <b>0.079</b> | <b>0.01</b> |      |
| Decode – Replication                               | -        | 1.00        | 0.677           | 0.782(1979)         | 0.779(142627)        | 0.019        | 0.045       |      |
| <b>PGC_SCZ wave3 (incl. wave2 and replication)</b> | <b>6</b> | <b>0.97</b> | <b>2.83e-14</b> | <b>0.84(76755)</b>  | <b>0.798(243650)</b> | <b>0.076</b> | <b>0.01</b> |      |

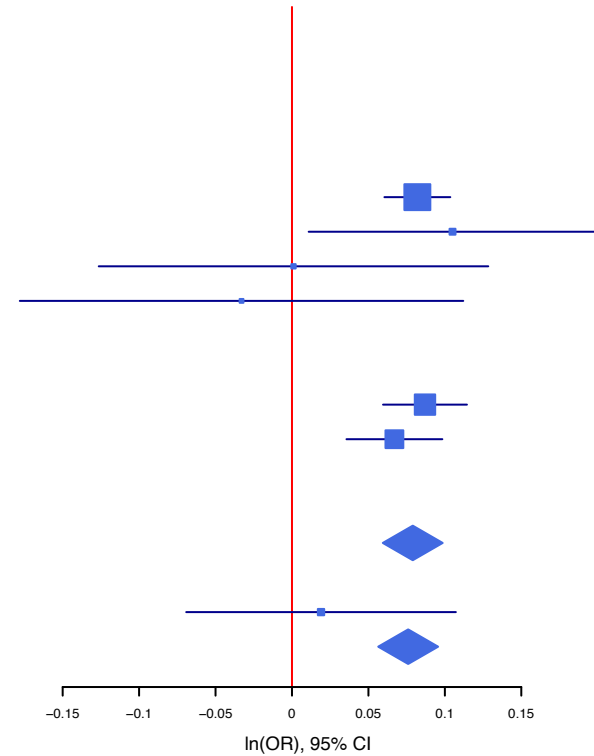

rs12991836

A/C  
---  
het\_P: 0.337 het\_I: 8.2

2:145141541

|                        | ngt | info | p_value  | f_ca(n)      | f_co(n)      | ln(OR) | STDerr |
|------------------------|-----|------|----------|--------------|--------------|--------|--------|
| PGC_SCZ wave3 eur only | 73  | 0.99 | 1.62e-11 | 0.63(53386)  | 0.643(77258) | -0.061 | 0.009  |
| PGC_SCZ wave3 asn only | 10  | 0.96 | 0.00397  | 0.457(14004) | 0.463(16757) | -0.05  | 0.017  |
| PGC_SCZ afram only     | -   | 1.01 | 0.744    | -(6152)      | 0.844(3918)  | -0.013 | 0.04   |
| PGC_SCZ latino only    | -   | 1.00 | 0.915    | -(1234)      | 0.636(3090)  | -0.006 | 0.052  |

|                             |    |      |          |              |              |        |       |
|-----------------------------|----|------|----------|--------------|--------------|--------|-------|
| PGC_SCZ wave2 only          | 39 | 0.99 | 4.45e-07 | 0.62(34850)  | 0.636(44347) | -0.057 | 0.011 |
| PGC_SCZ wave3 (excl. wave2) | 44 | 0.99 | 3.6e-07  | 0.635(39926) | 0.634(56676) | -0.054 | 0.011 |

**PGC\_SCZ wave3 (incl. wave2)**      **83**   **0.99**   **8.19e-13**   **0.629(74776)**   **0.635(101023)**   **-0.056**   **0.008**

Decode – Replication      -   1.00   0.00139   0.632(1979)   0.628(142627)   -0.125   0.039

**PGC\_SCZ wave3 (incl. wave2 and replication)**   **83**   **0.99**   **2.89e-14**   **0.629(76755)**   **0.631(243650)**   **-0.058**   **0.008**

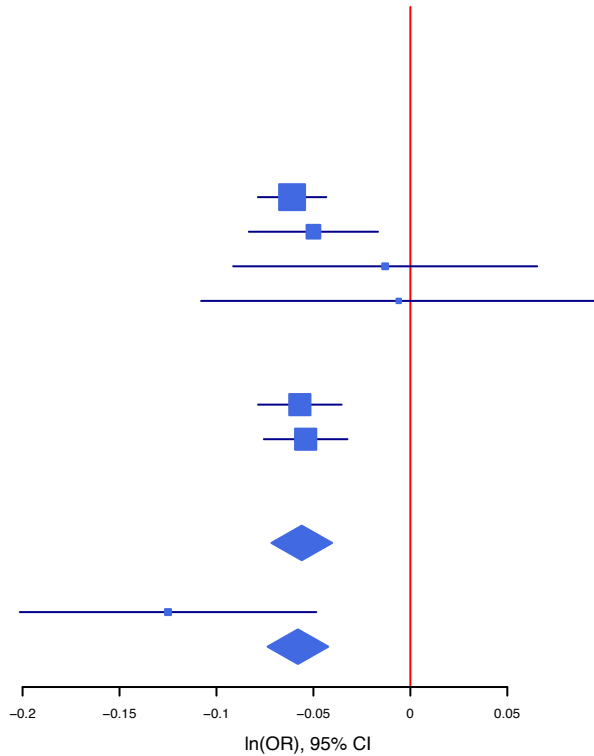

rs62334820

C/T  
++- 4:176855221  
het\_P: 0.161 het\_I: 45.3

|                        | ngt | info | p_value  | f_ca(n)      | f_co(n)      | ln(OR) | STDerr |
|------------------------|-----|------|----------|--------------|--------------|--------|--------|
| PGC_SCZ wave3 eur only | 6   | 0.99 | 2.49e-11 | 0.79(53386)  | 0.799(77258) | -0.071 | 0.011  |
| PGC_SCZ wave3 asn only | 0   | 0.96 | 0.000755 | 0.894(14004) | 0.902(16757) | -0.096 | 0.028  |
| PGC_SCZ afram only     | -   | 0.92 | 0.224    | -(6152)      | 0.934(3918)  | -0.075 | 0.062  |
| PGC_SCZ latino only    | -   | 1.01 | 0.39     | -(1234)      | 0.846(3090)  | 0.059  | 0.069  |

|                             |   |      |          |              |              |        |       |
|-----------------------------|---|------|----------|--------------|--------------|--------|-------|
| PGC_SCZ wave2 only          | 0 | 0.99 | 2.07e-07 | 0.794(34850) | 0.801(44347) | -0.07  | 0.014 |
| PGC_SCZ wave3 (excl. wave2) | 6 | 0.98 | 2.2e-07  | 0.854(39926) | 0.85(56676)  | -0.073 | 0.014 |

**PGC\_SCZ wave3 (incl. wave2)**      **6**   **0.98**   **2.25e-13**   **0.831(74776)**   **0.831(101023)**   **-0.072**   **0.01**

Decode – Replication      -   1.00   0.0555   0.816(1979)   0.808(142627)   -0.089   0.047

**PGC\_SCZ wave3 (incl. wave2 and replication)**      **6**   **0.99**   **4.23e-14**   **0.831(76755)**   **0.818(243650)**   **-0.072**   **0.01**

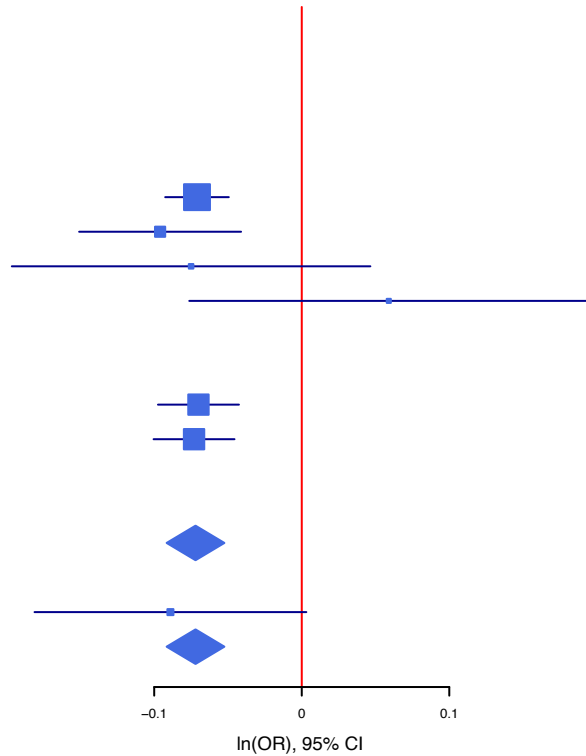

|                                                    | C/T       |             | 11:132573390    |                     | het_P:               | 0.608        | het_I:       | 0.0 |
|----------------------------------------------------|-----------|-------------|-----------------|---------------------|----------------------|--------------|--------------|-----|
|                                                    | ngt       | info        | p_value         | f_ca(n)             |                      |              |              |     |
| PGC_SCZ wave3 eur only                             | 50        | 0.99        | 1.22e-08        | 0.518(53386)        | 0.502(77258)         | 0.049        | 0.009        |     |
| PGC_SCZ wave3 asn only                             | 8         | 0.97        | 1.26e-05        | 0.569(14004)        | 0.552(16757)         | 0.076        | 0.017        |     |
| PGC_SCZ afram only                                 | -         | 0.96        | 0.239           | -(6152)             | 0.525(3918)          | 0.035        | 0.03         |     |
| PGC_SCZ latino only                                | -         | 1.00        | 0.0649          | -(1234)             | 0.421(3090)          | 0.093        | 0.05         |     |
| PGC_SCZ wave2 only                                 | 41        | 1.00        | 0.000208        | 0.521(34850)        | 0.509(44347)         | 0.04         | 0.011        |     |
| PGC_SCZ wave3 (excl. wave2)                        | 17        | 0.98        | 6.16e-11        | 0.511(39926)        | 0.501(56676)         | 0.066        | 0.01         |     |
| <b>PGC_SCZ wave3 (incl. wave2)</b>                 | <b>58</b> | <b>0.99</b> | <b>1.92e-13</b> | <b>0.515(74776)</b> | <b>0.504(101023)</b> | <b>0.054</b> | <b>0.007</b> |     |
| Decode – Replication                               | -         | 1.00        | 0.0661          | 0.524(1979)         | 0.505(142627)        | 0.069        | 0.038        |     |
| <b>PGC_SCZ wave3 (incl. wave2 and replication)</b> | <b>58</b> | <b>0.99</b> | <b>4.64e-14</b> | <b>0.515(76755)</b> | <b>0.505(243650)</b> | <b>0.055</b> | <b>0.007</b> |     |

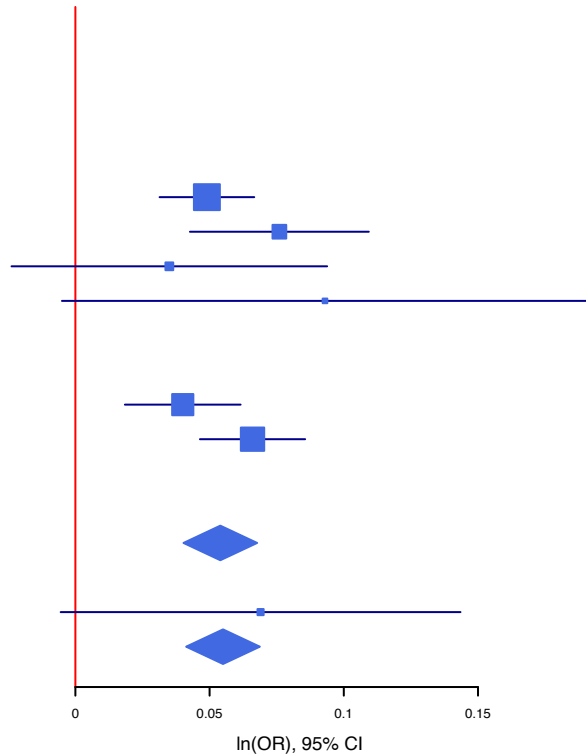

rs16851048                    T/C                    1:177276006  
 ---                    het\_P:                    0.659    het\_I:                    0.0

|                                                    | ngt       | info        | p_value         | f_ca(n)             | f_co(n)              | ln(OR)        | STDerr       |
|----------------------------------------------------|-----------|-------------|-----------------|---------------------|----------------------|---------------|--------------|
| PGC_SCZ wave3 eur only                             | 18        | 0.99        | 4.15e-12        | 0.792(53386)        | 0.805(77258)         | -0.074        | 0.011        |
| PGC_SCZ wave3 asn only                             | 3         | 0.97        | 0.0943          | 0.819(14004)        | 0.826(16757)         | -0.038        | 0.022        |
| PGC_SCZ afram only                                 | -         | 0.99        | 0.0447          | -(6152)             | 0.596(3918)          | -0.06         | 0.03         |
| PGC_SCZ latino only                                | -         | 0.99        | 0.0464          | -(1234)             | 0.791(3090)          | -0.121        | 0.061        |
| PGC_SCZ wave2 only                                 | 12        | 0.99        | 9.19e-08        | 0.796(34850)        | 0.808(44347)         | -0.073        | 0.014        |
| PGC_SCZ wave3 (excl. wave2)                        | 9         | 0.99        | 1.58e-07        | 0.757(39926)        | 0.774(56676)         | -0.064        | 0.012        |
| <b>PGC_SCZ wave3 (incl. wave2)</b>                 | <b>21</b> | <b>0.99</b> | <b>8.28e-14</b> | <b>0.773(74776)</b> | <b>0.788(101023)</b> | <b>-0.068</b> | <b>0.009</b> |
| Decode – Replication                               | -         | 1.00        | 0.303           | 0.777(1979)         | 0.783(142627)        | -0.047        | 0.046        |
| <b>PGC_SCZ wave3 (incl. wave2 and replication)</b> | <b>21</b> | <b>1.00</b> | <b>4.69e-14</b> | <b>0.773(76755)</b> | <b>0.785(243650)</b> | <b>-0.067</b> | <b>0.009</b> |

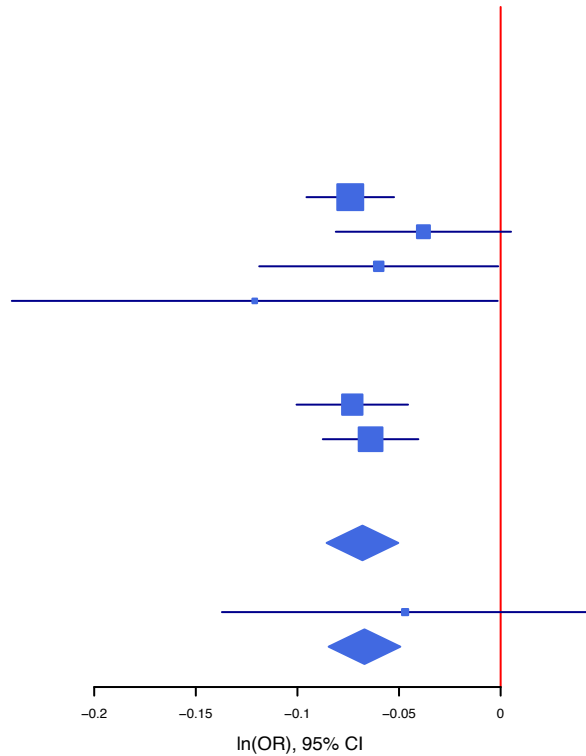



rs17731

G/A

10:3821561

+++

het\_P:

0.049

het\_I:

66.8

|  | ngt | info | p_value | f_ca(n) | f_co(n) | ln(OR) | STDerr |
|--|-----|------|---------|---------|---------|--------|--------|
|--|-----|------|---------|---------|---------|--------|--------|

|                        |    |      |          |             |              |        |       |
|------------------------|----|------|----------|-------------|--------------|--------|-------|
| PGC_SCZ wave3 eur only | 24 | 0.99 | 4.37e-09 | 0.62(53386) | 0.635(77258) | -0.052 | 0.009 |
|------------------------|----|------|----------|-------------|--------------|--------|-------|

|                        |   |      |         |              |             |        |       |
|------------------------|---|------|---------|--------------|-------------|--------|-------|
| PGC_SCZ wave3 asn only | 5 | 1.00 | 8.7e-06 | 0.488(14004) | 0.51(16757) | -0.076 | 0.017 |
|------------------------|---|------|---------|--------------|-------------|--------|-------|

|                    |   |      |       |         |             |        |       |
|--------------------|---|------|-------|---------|-------------|--------|-------|
| PGC_SCZ afram only | - | 1.01 | 0.969 | -(6152) | 0.922(3918) | -0.002 | 0.056 |
|--------------------|---|------|-------|---------|-------------|--------|-------|

|                     |   |      |          |         |             |        |       |
|---------------------|---|------|----------|---------|-------------|--------|-------|
| PGC_SCZ latino only | - | 1.00 | 0.000997 | -(1234) | 0.738(3090) | -0.182 | 0.055 |
|---------------------|---|------|----------|---------|-------------|--------|-------|

|                    |    |      |          |              |              |        |       |
|--------------------|----|------|----------|--------------|--------------|--------|-------|
| PGC_SCZ wave2 only | 23 | 0.99 | 7.41e-05 | 0.614(34850) | 0.634(44347) | -0.044 | 0.011 |
|--------------------|----|------|----------|--------------|--------------|--------|-------|

|                             |   |      |          |              |              |        |       |
|-----------------------------|---|------|----------|--------------|--------------|--------|-------|
| PGC_SCZ wave3 (excl. wave2) | 6 | 0.99 | 2.03e-11 | 0.673(39926) | 0.665(56676) | -0.072 | 0.011 |
|-----------------------------|---|------|----------|--------------|--------------|--------|-------|

|                                    |           |             |                 |                     |                      |               |              |
|------------------------------------|-----------|-------------|-----------------|---------------------|----------------------|---------------|--------------|
| <b>PGC_SCZ wave3 (incl. wave2)</b> | <b>29</b> | <b>0.99</b> | <b>2.94e-14</b> | <b>0.649(74776)</b> | <b>0.653(101023)</b> | <b>-0.059</b> | <b>0.008</b> |
|------------------------------------|-----------|-------------|-----------------|---------------------|----------------------|---------------|--------------|

|                      |   |      |       |             |               |        |       |
|----------------------|---|------|-------|-------------|---------------|--------|-------|
| Decode - Replication | - | 1.00 | 0.853 | 0.611(1979) | 0.646(142627) | -0.007 | 0.039 |
|----------------------|---|------|-------|-------------|---------------|--------|-------|

|                                                    |           |             |                 |                     |                      |               |              |
|----------------------------------------------------|-----------|-------------|-----------------|---------------------|----------------------|---------------|--------------|
| <b>PGC_SCZ wave3 (incl. wave2 and replication)</b> | <b>29</b> | <b>0.99</b> | <b>4.78e-14</b> | <b>0.648(76755)</b> | <b>0.649(243650)</b> | <b>-0.057</b> | <b>0.008</b> |
|----------------------------------------------------|-----------|-------------|-----------------|---------------------|----------------------|---------------|--------------|

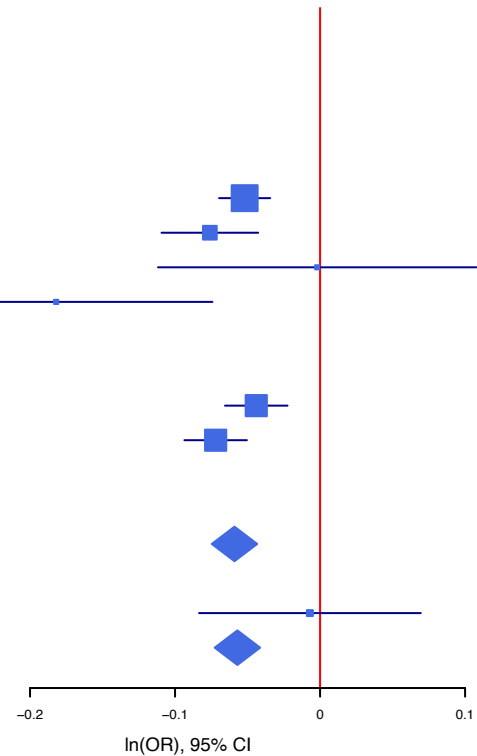

rs72802887                    A/G                    5:152249082  
 +++                    het\_P:                    0.661    het\_I:                    0.0

|                                                    | ngt      | info        | p_value         | f_ca(n)             | f_co(n)              | ln(OR)       | STDerr       |
|----------------------------------------------------|----------|-------------|-----------------|---------------------|----------------------|--------------|--------------|
| PGC_SCZ wave3 eur only                             | 0        | 1.00        | 6.11e-13        | 0.724(53386)        | 0.706(77258)         | 0.069        | 0.01         |
| PGC_SCZ wave3 asn only                             | 0        | 0.84        | 0.0767          | 0.978(14004)        | 0.982(16757)         | -0.127       | 0.072        |
| PGC_SCZ afram only                                 | -        | 0.97        | 0.337           | -(6152)             | 0.944(3918)          | 0.063        | 0.065        |
| PGC_SCZ latino only                                | -        | 1.01        | 0.0555          | -(1234)             | 0.823(3090)          | 0.126        | 0.066        |
| PGC_SCZ wave2 only                                 | 0        | 1.00        | 9.82e-11        | 0.735(34850)        | 0.711(44347)         | 0.079        | 0.012        |
| PGC_SCZ wave3 (excl. wave2)                        | 0        | 0.96        | 0.000545        | 0.84(39926)         | 0.816(56676)         | 0.05         | 0.014        |
| <b>PGC_SCZ wave3 (incl. wave2)</b>                 | <b>0</b> | <b>0.98</b> | <b>8.53e-13</b> | <b>0.797(74776)</b> | <b>0.774(101023)</b> | <b>0.067</b> | <b>0.009</b> |
| Decode – Replication                               | -        | 1.00        | 0.0115          | 0.723(1979)         | 0.718(142627)        | 0.107        | 0.042        |
| <b>PGC_SCZ wave3 (incl. wave2 and replication)</b> | <b>0</b> | <b>0.99</b> | <b>4.82e-14</b> | <b>0.795(76755)</b> | <b>0.743(243650)</b> | <b>0.068</b> | <b>0.009</b> |

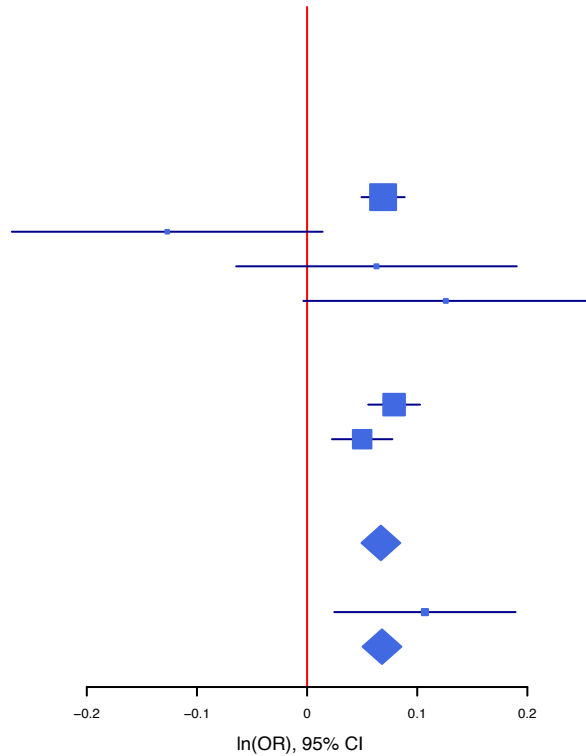

rs73219806

C/A  
+++      8:26279173  
het\_P:      0.014      het\_I:      76.5

|                                                    | ngt      | info        | p_value         | f_ca(n)             | f_co(n)              | ln(OR)        | STDerr       |
|----------------------------------------------------|----------|-------------|-----------------|---------------------|----------------------|---------------|--------------|
| PGC_SCZ wave3 eur only                             | 7        | 0.96        | 2.81e-07        | 0.827(53386)        | 0.837(77258)         | -0.06         | 0.012        |
| PGC_SCZ wave3 asn only                             | 0        | 0.87        | 1.32e-06        | 0.6(14004)          | 0.62(16757)          | -0.09         | 0.019        |
| PGC_SCZ afram only                                 | -        | 0.96        | 0.124           | -(6152)             | 0.736(3918)          | -0.052        | 0.034        |
| PGC_SCZ latino only                                | -        | 0.98        | 7.04e-05        | -(1234)             | 0.82(3090)           | -0.253        | 0.064        |
| PGC_SCZ wave2 only                                 | 1        | 0.96        | 3.18e-08        | 0.815(34850)        | 0.834(44347)         | -0.081        | 0.015        |
| PGC_SCZ wave3 (excl. wave2)                        | 6        | 0.94        | 1.4e-07         | 0.756(39926)        | 0.769(56676)         | -0.065        | 0.012        |
| <b>PGC_SCZ wave3 (incl. wave2)</b>                 | <b>7</b> | <b>0.95</b> | <b>2.71e-14</b> | <b>0.779(74776)</b> | <b>0.794(101023)</b> | <b>-0.071</b> | <b>0.009</b> |
| Decode – Replication                               | -        | 0.85        | 0.749           | 0.832(1979)         | 0.833(142627)        | 0.028         | 0.087        |
| <b>PGC_SCZ wave3 (incl. wave2 and replication)</b> | <b>7</b> | <b>0.95</b> | <b>5.16e-14</b> | <b>0.78(76755)</b>  | <b>0.794(243650)</b> | <b>-0.07</b>  | <b>0.009</b> |

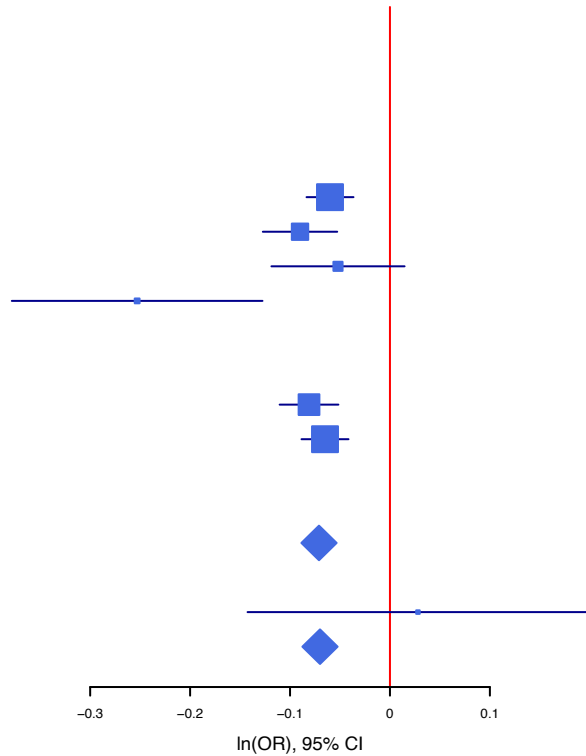

| rs11083369                                         | G/T      |             | 18:27481687     |                     |                      |               |              |
|----------------------------------------------------|----------|-------------|-----------------|---------------------|----------------------|---------------|--------------|
|                                                    | +++      | het_P:      | 0.706           | het_I:              | 0.0                  |               |              |
|                                                    | ngt      | info        | p_value         | f_ca(n)             | f_co(n)              | ln(OR)        | STDerr       |
| PGC_SCZ wave3 eur only                             | 2        | 0.96        | 2.25e-08        | 0.729(53386)        | 0.74(77258)          | -0.056        | 0.01         |
| PGC_SCZ wave3 asn only                             | 1        | 0.95        | 0.000298        | 0.715(14004)        | 0.727(16757)         | -0.07         | 0.019        |
| PGC_SCZ afram only                                 | -        | 0.97        | 0.00606         | -(6152)             | 0.599(3918)          | -0.083        | 0.03         |
| PGC_SCZ latino only                                | -        | 0.98        | 0.145           | -(1234)             | 0.6(3090)            | -0.075        | 0.052        |
| PGC_SCZ wave2 only                                 | 2        | 0.95        | 0.000739        | 0.73(34850)         | 0.739(44347)         | -0.042        | 0.013        |
| PGC_SCZ wave3 (excl. wave2)                        | 1        | 0.97        | 1.61e-11        | 0.674(39926)        | 0.695(56676)         | -0.076        | 0.011        |
| <b>PGC_SCZ wave3 (incl. wave2)</b>                 | <b>3</b> | <b>0.96</b> | <b>3.05e-13</b> | <b>0.696(74776)</b> | <b>0.712(101023)</b> | <b>-0.061</b> | <b>0.008</b> |
| Decode – Replication                               | -        | 1.00        | 0.0776          | 0.737(1979)         | 0.732(142627)        | -0.077        | 0.044        |
| <b>PGC_SCZ wave3 (incl. wave2 and replication)</b> | <b>3</b> | <b>0.98</b> | <b>5.24e-14</b> | <b>0.697(76755)</b> | <b>0.723(243650)</b> | <b>-0.061</b> | <b>0.008</b> |

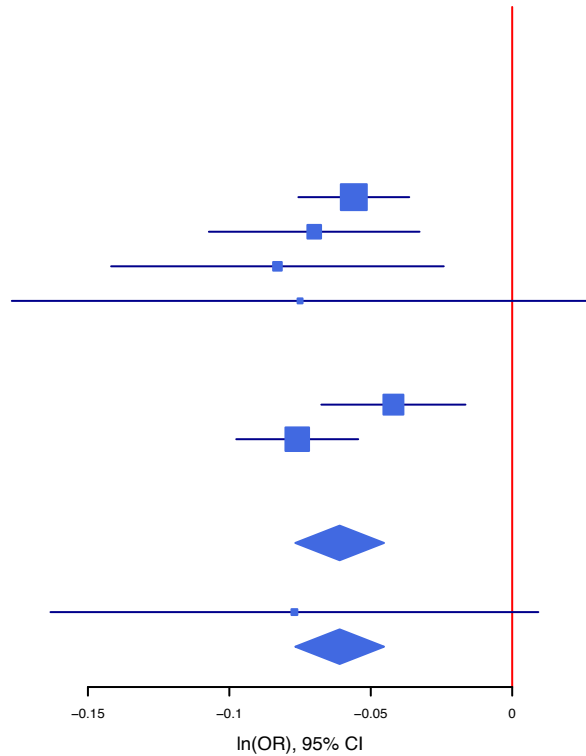

**rs11632947**                      **C/T**                      **15:61852732**  
 +++                      het\_P:                      0.612    het\_I:                      0.0

|                                                    | ngt      | info        | p_value         | f_ca(n)             | f_co(n)              | ln(OR)        | STDerr       |
|----------------------------------------------------|----------|-------------|-----------------|---------------------|----------------------|---------------|--------------|
| PGC_SCZ wave3 eur only                             | 0        | 1.00        | 1.54e-12        | 0.445(53386)        | 0.461(77258)         | -0.061        | 0.009        |
| PGC_SCZ wave3 asn only                             | 0        | 0.99        | 0.0835          | 0.704(14004)        | 0.718(16757)         | -0.032        | 0.019        |
| PGC_SCZ afram only                                 | -        | 1.02        | 0.0573          | -(6152)             | 0.738(3918)          | -0.064        | 0.033        |
| PGC_SCZ latino only                                | -        | 1.02        | 0.897           | -(1234)             | 0.614(3090)          | -0.007        | 0.051        |
| PGC_SCZ wave2 only                                 | 0        | 1.00        | 1.37e-08        | 0.46(34850)         | 0.468(44347)         | -0.062        | 0.011        |
| PGC_SCZ wave3 (excl. wave2)                        | 0        | 1.00        | 2.52e-06        | 0.594(39926)        | 0.582(56676)         | -0.049        | 0.01         |
| <b>PGC_SCZ wave3 (incl. wave2)</b>                 | <b>0</b> | <b>1.00</b> | <b>1.64e-13</b> | <b>0.542(74776)</b> | <b>0.538(101023)</b> | <b>-0.055</b> | <b>0.008</b> |
| Decode – Replication                               | -        | 1.00        | 0.186           | 0.453(1979)         | 0.433(142627)        | -0.051        | 0.039        |
| <b>PGC_SCZ wave3 (incl. wave2 and replication)</b> | <b>0</b> | <b>1.00</b> | <b>6.24e-14</b> | <b>0.54(76755)</b>  | <b>0.48(243650)</b>  | <b>-0.055</b> | <b>0.007</b> |

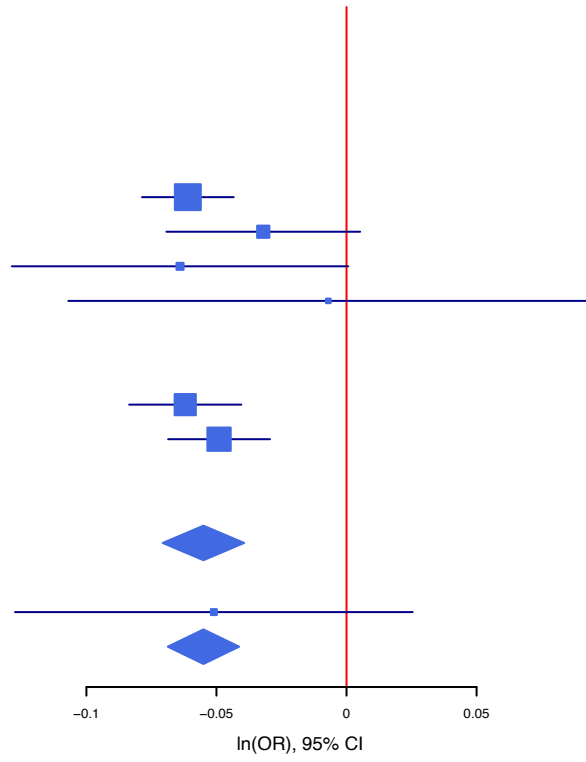

| rs9545047                                          | A/C      |             | 13:79859456     |                     | het_P:               | 0.718        | het_I:       | 0.0 |
|----------------------------------------------------|----------|-------------|-----------------|---------------------|----------------------|--------------|--------------|-----|
|                                                    | ngt      | info        | p_value         | f_ca(n)             |                      |              |              |     |
| PGC_SCZ wave3 eur only                             | 0        | 0.98        | 5.53e-12        | 0.616(53386)        | 0.602(77258)         | 0.061        | 0.009        |     |
| PGC_SCZ wave3 asn only                             | 0        | 0.98        | 0.377           | 0.743(14004)        | 0.739(16757)         | 0.017        | 0.02         |     |
| PGC_SCZ afram only                                 | -        | 0.91        | 0.151           | -(6152)             | 0.913(3918)          | 0.08         | 0.056        |     |
| PGC_SCZ latino only                                | -        | 0.98        | 0.11            | -(1234)             | 0.757(3090)          | 0.094        | 0.059        |     |
| PGC_SCZ wave2 only                                 | 0        | 0.99        | 1.8e-06         | 0.622(34850)        | 0.605(44347)         | 0.053        | 0.011        |     |
| PGC_SCZ wave3 (excl. wave2)                        | 0        | 0.96        | 4.78e-07        | 0.732(39926)        | 0.702(56676)         | 0.057        | 0.011        |     |
| <b>PGC_SCZ wave3 (incl. wave2)</b>                 | <b>0</b> | <b>0.97</b> | <b>4.12e-12</b> | <b>0.689(74776)</b> | <b>0.665(101023)</b> | <b>0.055</b> | <b>0.008</b> |     |
| Decode – Replication                               | -        | 1.00        | 0.00129         | 0.609(1979)         | 0.607(142627)        | 0.125        | 0.039        |     |
| <b>PGC_SCZ wave3 (incl. wave2 and replication)</b> | <b>0</b> | <b>0.99</b> | <b>7.63e-14</b> | <b>0.687(76755)</b> | <b>0.633(243650)</b> | <b>0.058</b> | <b>0.008</b> |     |

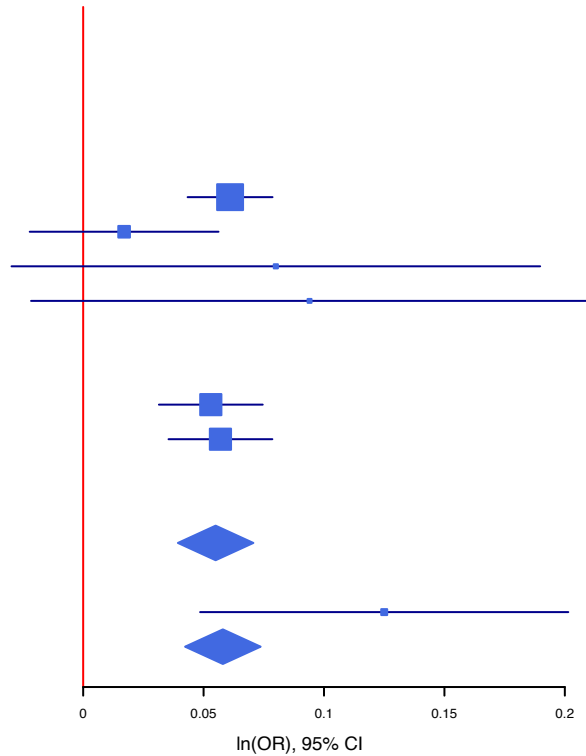

| rs324017                                           | A/C       |             | 12:57487814     |                     | het_P:               | 0.691         | het_I:       | 0.0 |
|----------------------------------------------------|-----------|-------------|-----------------|---------------------|----------------------|---------------|--------------|-----|
|                                                    | ngt       | info        | p_value         | f_ca(n)             |                      |               |              |     |
| PGC_SCZ wave3 eur only                             | 30        | 0.99        | 7.52e-12        | 0.278(53386)        | 0.29(77258)          | -0.066        | 0.01         |     |
| PGC_SCZ wave3 asn only                             | 2         | 0.96        | 0.151           | 0.468(14004)        | 0.474(16757)         | -0.025        | 0.018        |     |
| PGC_SCZ afram only                                 | -         | 1.00        | 0.0155          | -(6152)             | 0.196(3918)          | -0.088        | 0.036        |     |
| PGC_SCZ latino only                                | -         | 1.03        | 0.321           | -(1234)             | 0.298(3090)          | -0.054        | 0.054        |     |
| PGC_SCZ wave2 only                                 | 0         | 0.98        | 1.34e-07        | 0.292(34850)        | 0.3(44347)           | -0.063        | 0.012        |     |
| PGC_SCZ wave3 (excl. wave2)                        | 32        | 0.99        | 1.27e-06        | 0.306(39926)        | 0.314(56676)         | -0.053        | 0.011        |     |
| <b>PGC_SCZ wave3 (incl. wave2)</b>                 | <b>32</b> | <b>0.99</b> | <b>9.12e-13</b> | <b>0.301(74776)</b> | <b>0.309(101023)</b> | <b>-0.058</b> | <b>0.008</b> |     |
| Decode – Replication                               | -         | 1.00        | 0.015           | 0.302(1979)         | 0.284(142627)        | -0.104        | 0.043        |     |
| <b>PGC_SCZ wave3 (incl. wave2 and replication)</b> | <b>32</b> | <b>0.99</b> | <b>8.42e-14</b> | <b>0.301(76755)</b> | <b>0.295(243650)</b> | <b>-0.059</b> | <b>0.008</b> |     |

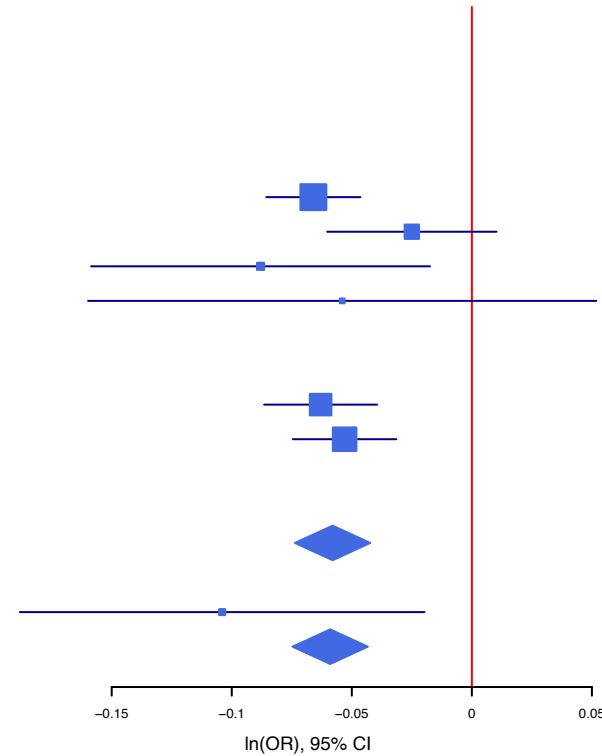

| rs2057884                                          | T/C      |             | 7:104930250     |                     |                      |              |              |
|----------------------------------------------------|----------|-------------|-----------------|---------------------|----------------------|--------------|--------------|
|                                                    | ++-      |             | het_P:          | 0.264               | het_I:               | 25.0         |              |
|                                                    | ngt      | info        | p_value         | f_ca(n)             | f_co(n)              | ln(OR)       | STDerr       |
| PGC_SCZ wave3 eur only                             | 2        | 1.00        | 6.61e-14        | 0.356(53386)        | 0.34(77258)          | 0.068        | 0.009        |
| PGC_SCZ wave3 asn only                             | 1        | 0.98        | 0.175           | 0.373(14004)        | 0.369(16757)         | 0.024        | 0.018        |
| PGC_SCZ afram only                                 | -        | 1.00        | 0.0771          | -(6152)             | 0.565(3918)          | 0.052        | 0.03         |
| PGC_SCZ latino only                                | -        | 1.00        | 0.598           | -(1234)             | 0.331(3090)          | -0.028       | 0.053        |
| PGC_SCZ wave2 only                                 | 2        | 1.00        | 9.3e-10         | 0.353(34850)        | 0.335(44347)         | 0.07         | 0.011        |
| PGC_SCZ wave3 (excl. wave2)                        | 1        | 1.00        | 1.3e-05         | 0.399(39926)        | 0.383(56676)         | 0.045        | 0.01         |
| <b>PGC_SCZ wave3 (incl. wave2)</b>                 | <b>3</b> | <b>1.00</b> | <b>1.49e-13</b> | <b>0.38(74776)</b>  | <b>0.364(101023)</b> | <b>0.056</b> | <b>0.008</b> |
| Decode – Replication                               | -        | 1.00        | 0.353           | 0.339(1979)         | 0.356(142627)        | 0.036        | 0.039        |
| <b>PGC_SCZ wave3 (incl. wave2 and replication)</b> | <b>3</b> | <b>1.00</b> | <b>8.57e-14</b> | <b>0.379(76755)</b> | <b>0.359(243650)</b> | <b>0.056</b> | <b>0.008</b> |

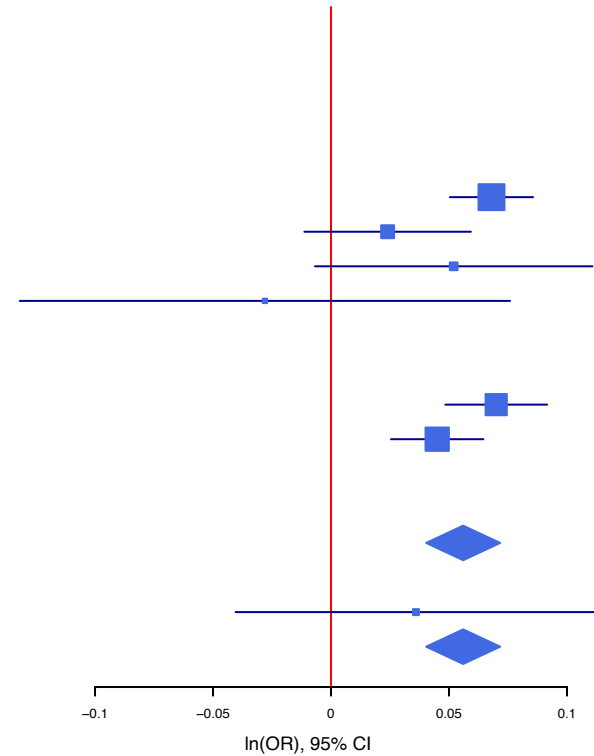



rs9607782                      T/A                      22:41587556  
 +++                      het\_P:                      0.699    het\_I:                      0.0

|                                                    | ngt      | info        | p_value         | f_ca(n)             | f_co(n)              | ln(OR)        | STDerr       |
|----------------------------------------------------|----------|-------------|-----------------|---------------------|----------------------|---------------|--------------|
| PGC_SCZ wave3 eur only                             | 0        | 0.98        | 4.97e-14        | 0.741(53386)        | 0.754(77258)         | -0.076        | 0.01         |
| PGC_SCZ wave3 asn only                             | 0        | 0.85        | 0.414           | 0.933(14004)        | 0.934(16757)         | -0.03         | 0.037        |
| PGC_SCZ afram only                                 | -        | 0.86        | 0.0629          | -(6152)             | 0.805(3918)          | -0.076        | 0.041        |
| PGC_SCZ latino only                                | -        | 0.95        | 0.609           | -(1234)             | 0.436(3090)          | -0.027        | 0.053        |
| PGC_SCZ wave2 only                                 | 0        | 0.98        | 5.32e-12        | 0.748(34850)        | 0.759(44347)         | -0.088        | 0.013        |
| PGC_SCZ wave3 (excl. wave2)                        | 0        | 0.93        | 0.000102        | 0.739(39926)        | 0.754(56676)         | -0.053        | 0.014        |
| <b>PGC_SCZ wave3 (incl. wave2)</b>                 | <b>0</b> | <b>0.95</b> | <b>1.69e-14</b> | <b>0.742(74776)</b> | <b>0.755(101023)</b> | <b>-0.071</b> | <b>0.009</b> |
| Decode – Replication                               | -        | 1.00        | 0.779           | 0.758(1979)         | 0.735(142627)        | 0.012         | 0.043        |
| <b>PGC_SCZ wave3 (incl. wave2 and replication)</b> | <b>0</b> | <b>0.98</b> | <b>1.04e-13</b> | <b>0.742(76755)</b> | <b>0.744(243650)</b> | <b>-0.068</b> | <b>0.009</b> |

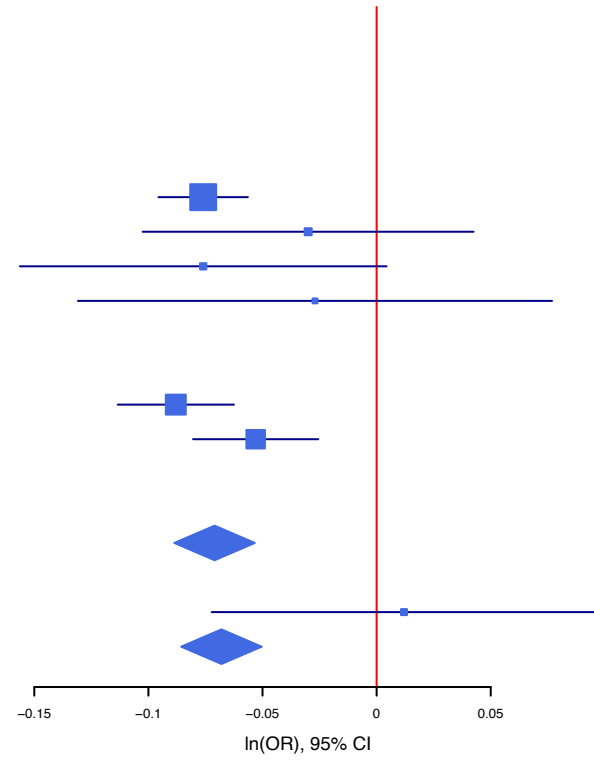

rs9636107                    A/G                    18:53200117  
 ---                    het\_P:                    0.303    het\_I:                    16.3

|                                                    | ngt       | info        | p_value         | f_ca(n)             | f_co(n)              | ln(OR)        | STDerr       |
|----------------------------------------------------|-----------|-------------|-----------------|---------------------|----------------------|---------------|--------------|
| PGC_SCZ wave3 eur only                             | 21        | 1.00        | 5.12e-16        | 0.506(53386)        | 0.529(77258)         | -0.07         | 0.009        |
| PGC_SCZ wave3 asn only                             | 5         | 0.96        | 0.737           | 0.156(14004)        | 0.153(16757)         | 0.008         | 0.024        |
| PGC_SCZ afram only                                 | -         | 1.01        | 0.608           | -(6152)             | 0.504(3918)          | -0.015        | 0.029        |
| PGC_SCZ latino only                                | -         | 1.01        | 0.357           | -(1234)             | 0.487(3090)          | -0.046        | 0.05         |
| PGC_SCZ wave2 only                                 | 20        | 1.00        | 3.18e-13        | 0.488(34850)        | 0.522(44347)         | -0.08         | 0.011        |
| PGC_SCZ wave3 (excl. wave2)                        | 6         | 0.99        | 0.00122         | 0.423(39926)        | 0.434(56676)         | -0.035        | 0.011        |
| <b>PGC_SCZ wave3 (incl. wave2)</b>                 | <b>26</b> | <b>0.99</b> | <b>1.07e-13</b> | <b>0.448(74776)</b> | <b>0.468(101023)</b> | <b>-0.057</b> | <b>0.008</b> |
| Decode – Replication                               | -         | 1.00        | 0.476           | 0.487(1979)         | 0.51(142627)         | -0.027        | 0.038        |
| <b>PGC_SCZ wave3 (incl. wave2 and replication)</b> | <b>26</b> | <b>1.00</b> | <b>1.06e-13</b> | <b>0.449(76755)</b> | <b>0.491(243650)</b> | <b>-0.056</b> | <b>0.008</b> |

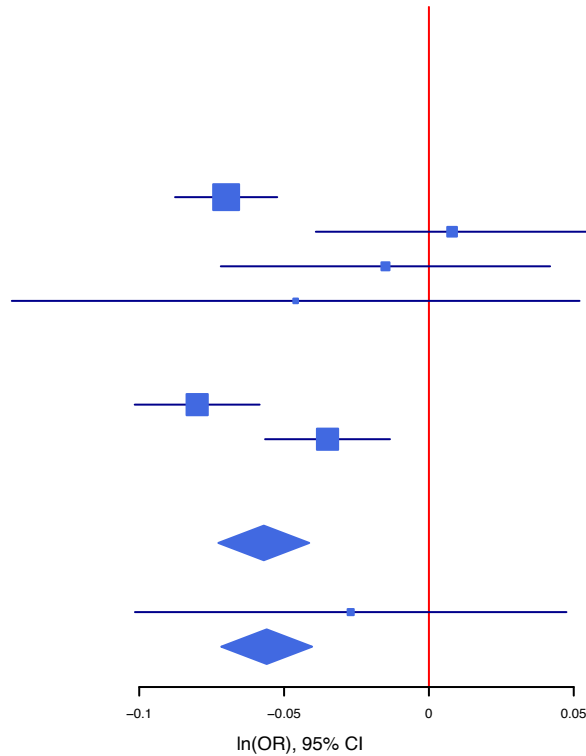

rs12883788 C/T 14:33303540  
 +++ het\_P: 0.998 het\_I: 0.0

|                                                    | ngt      | info        | p_value         | f_ca(n)             | f_co(n)              | ln(OR)        | STDerr       |
|----------------------------------------------------|----------|-------------|-----------------|---------------------|----------------------|---------------|--------------|
| PGC_SCZ wave3 eur only                             | 0        | 0.98        | 1.86e-12        | 0.527(53386)        | 0.542(77258)         | -0.061        | 0.009        |
| PGC_SCZ wave3 asn only                             | 0        | 0.94        | 0.332           | 0.7(14004)          | 0.705(16757)         | -0.019        | 0.02         |
| PGC_SCZ afram only                                 | -        | 1.01        | 0.146           | -(6152)             | 0.806(3918)          | -0.054        | 0.037        |
| PGC_SCZ latino only                                | -        | 0.99        | 0.32            | -(1234)             | 0.637(3090)          | -0.051        | 0.052        |
| PGC_SCZ wave2 only                                 | 0        | 0.99        | 5.11e-07        | 0.538(34850)        | 0.544(44347)         | -0.055        | 0.011        |
| PGC_SCZ wave3 (excl. wave2)                        | 0        | 0.98        | 7.25e-07        | 0.642(39926)        | 0.633(56676)         | -0.053        | 0.011        |
| <b>PGC_SCZ wave3 (incl. wave2)</b>                 | <b>0</b> | <b>0.98</b> | <b>1.3e-12</b>  | <b>0.601(74776)</b> | <b>0.599(101023)</b> | <b>-0.054</b> | <b>0.008</b> |
| Decode – Replication                               | -        | 1.00        | 0.0318          | 0.529(1979)         | 0.526(142627)        | -0.081        | 0.038        |
| <b>PGC_SCZ wave3 (incl. wave2 and replication)</b> | <b>0</b> | <b>0.99</b> | <b>1.21e-13</b> | <b>0.599(76755)</b> | <b>0.559(243650)</b> | <b>-0.055</b> | <b>0.007</b> |

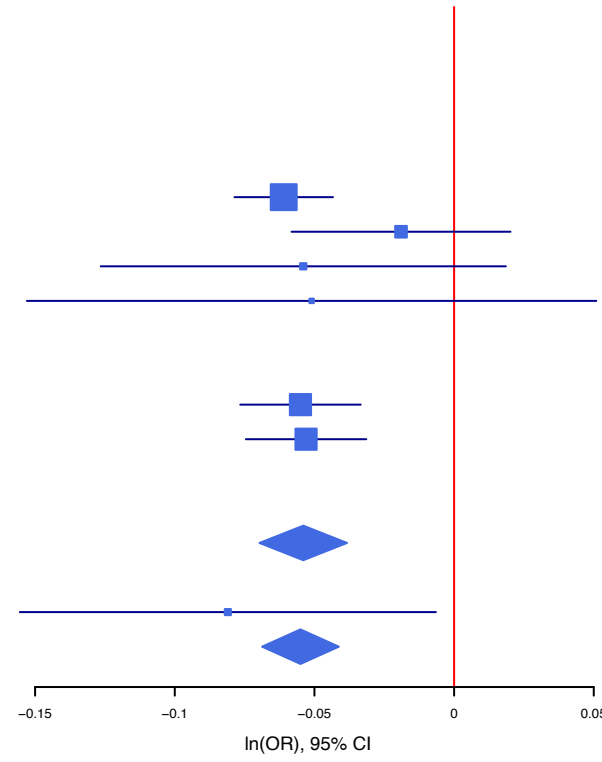

rs74914300

T/G  
-?-  
18:53010348  
het\_P: 0.624 het\_I: 0.0

|                                                    | ngt      | info        | p_value         | f_ca(n)             | f_co(n)              | ln(OR)        | STDerr       |
|----------------------------------------------------|----------|-------------|-----------------|---------------------|----------------------|---------------|--------------|
| PGC_SCZ wave3 eur only                             | 0        | 0.99        | 3.95e-13        | 0.957(53386)        | 0.963(77258)         | -0.16         | 0.022        |
| PGC_SCZ latino only                                | -        | 1.00        | 0.105           | -(1234)             | 0.972(3090)          | -0.231        | 0.142        |
| PGC_SCZ wave2 only                                 | 0        | 0.99        | 1.63e-08        | 0.957(34850)        | 0.963(44347)         | -0.161        | 0.028        |
| PGC_SCZ wave3 (excl. wave2)                        | 0        | 1.00        | 1.48e-06        | 0.961(39926)        | 0.965(56676)         | -0.163        | 0.034        |
| <b>PGC_SCZ wave3 (incl. wave2)</b>                 | <b>0</b> | <b>0.99</b> | <b>1.04e-13</b> | <b>0.959(74776)</b> | <b>0.964(101023)</b> | <b>-0.162</b> | <b>0.022</b> |
| Decode - Replication                               | -        | 1.00        | 0.624           | 0.962(1979)         | 0.96(142627)         | -0.053        | 0.108        |
| <b>PGC_SCZ wave3 (incl. wave2 and replication)</b> | <b>0</b> | <b>1.00</b> | <b>1.35e-13</b> | <b>0.959(76755)</b> | <b>0.962(243650)</b> | <b>-0.157</b> | <b>0.021</b> |

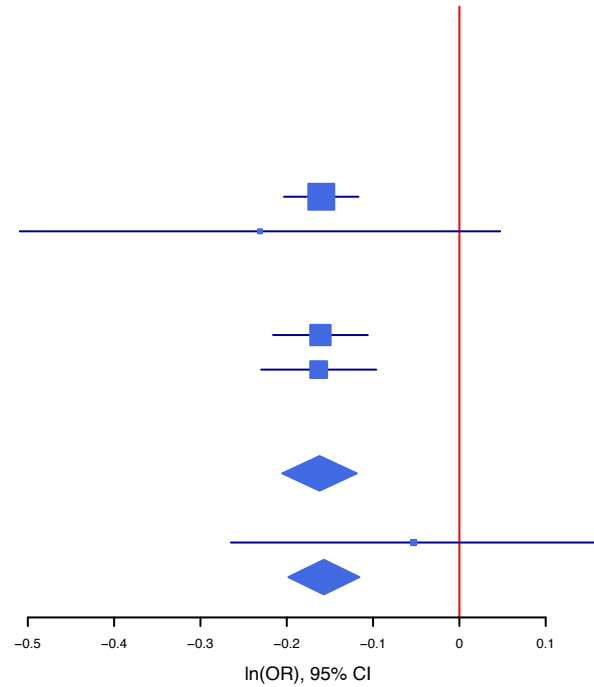

| rs2914983                                          | A/G      |             | 2:198314568     |                     | het_P:               | 0.059        | het_I:       | 64.7 |
|----------------------------------------------------|----------|-------------|-----------------|---------------------|----------------------|--------------|--------------|------|
|                                                    | ++       | +-          |                 |                     |                      |              |              |      |
|                                                    | ngt      | info        | p_value         | f_ca(n)             | f_co(n)              | ln(OR)       | STDerr       |      |
| PGC_SCZ wave3 eur only                             | 0        | 1.00        | 2.44e-13        | 0.334(53386)        | 0.323(77258)         | 0.067        | 0.009        |      |
| PGC_SCZ wave3 asn only                             | 0        | 0.97        | 0.00732         | 0.463(14004)        | 0.46(16757)          | 0.047        | 0.017        |      |
| PGC_SCZ afram only                                 | -        | 0.97        | 0.697           | -(6152)             | 0.168(3918)          | 0.015        | 0.04         |      |
| PGC_SCZ latino only                                | -        | 1.05        | 0.361           | -(1234)             | 0.444(3090)          | -0.047       | 0.051        |      |
| PGC_SCZ wave2 only                                 | 0        | 1.00        | 5.86e-11        | 0.346(34850)        | 0.332(44347)         | 0.075        | 0.012        |      |
| PGC_SCZ wave3 (excl. wave2)                        | 0        | 1.00        | 5.66e-05        | 0.348(39926)        | 0.344(56676)         | 0.044        | 0.011        |      |
| <b>PGC_SCZ wave3 (incl. wave2)</b>                 | <b>0</b> | <b>1.00</b> | <b>9.73e-14</b> | <b>0.348(74776)</b> | <b>0.339(101023)</b> | <b>0.058</b> | <b>0.008</b> |      |
| Decode – Replication                               | -        | 1.00        | 0.799           | 0.284(1979)         | 0.272(142627)        | 0.01         | 0.04         |      |
| <b>PGC_SCZ wave3 (incl. wave2 and replication)</b> | <b>0</b> | <b>1.00</b> | <b>1.37e-13</b> | <b>0.347(76755)</b> | <b>0.302(243650)</b> | <b>0.057</b> | <b>0.008</b> |      |

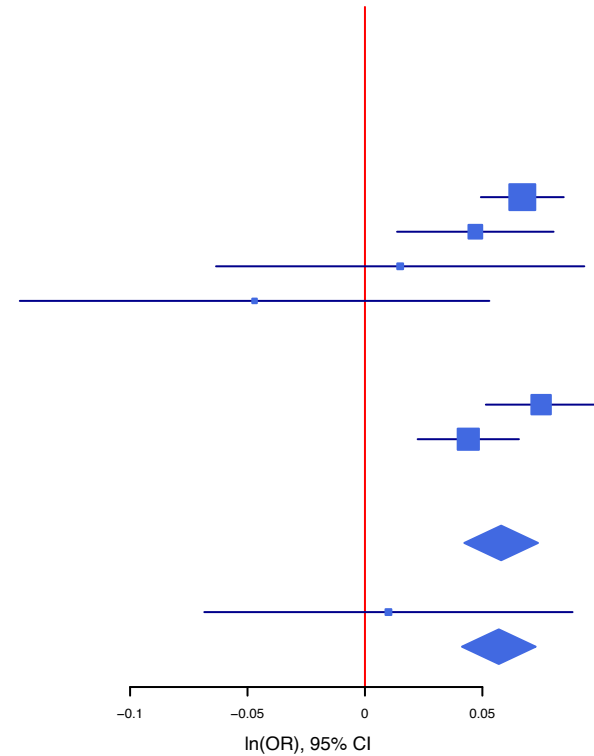

rs140001745

T/C  
+++                    2:201199831  
                          het\_P:            0.948    het\_I:    0.0

|                                                    | ngt      | info        | p_value         | f_ca(n)             | f_co(n)              | ln(OR)       | STDerr       |
|----------------------------------------------------|----------|-------------|-----------------|---------------------|----------------------|--------------|--------------|
| PGC_SCZ wave3 eur only                             | 0        | 0.99        | 0.000372        | 0.957(53386)        | 0.952(77258)         | 0.074        | 0.021        |
| PGC_SCZ wave3 asn only                             | 0        | 0.99        | 1.9e-10         | 0.847(14004)        | 0.829(16757)         | 0.148        | 0.023        |
| PGC_SCZ afram only                                 | -        | 0.97        | 0.192           | -(6152)             | 0.981(3918)          | 0.141        | 0.108        |
| PGC_SCZ latino only                                | -        | 1.05        | 0.0547          | -(1234)             | 0.75(3090)           | 0.114        | 0.059        |
| PGC_SCZ wave2 only                                 | 0        | 0.99        | 4.12e-07        | 0.95(34850)         | 0.949(44347)         | 0.127        | 0.025        |
| PGC_SCZ wave3 (excl. wave2)                        | 0        | 1.00        | 1.14e-07        | 0.896(39926)        | 0.899(56676)         | 0.098        | 0.018        |
| <b>PGC_SCZ wave3 (incl. wave2)</b>                 | <b>0</b> | <b>1.00</b> | <b>3.46e-13</b> | <b>0.918(74776)</b> | <b>0.918(101023)</b> | <b>0.108</b> | <b>0.015</b> |
| Decode – Replication                               | -        | 1.00        | 0.142           | 0.96(1979)          | 0.962(142627)        | 0.131        | 0.089        |
| <b>PGC_SCZ wave3 (incl. wave2 and replication)</b> | <b>0</b> | <b>1.00</b> | <b>1.38e-13</b> | <b>0.919(76755)</b> | <b>0.942(243650)</b> | <b>0.109</b> | <b>0.015</b> |

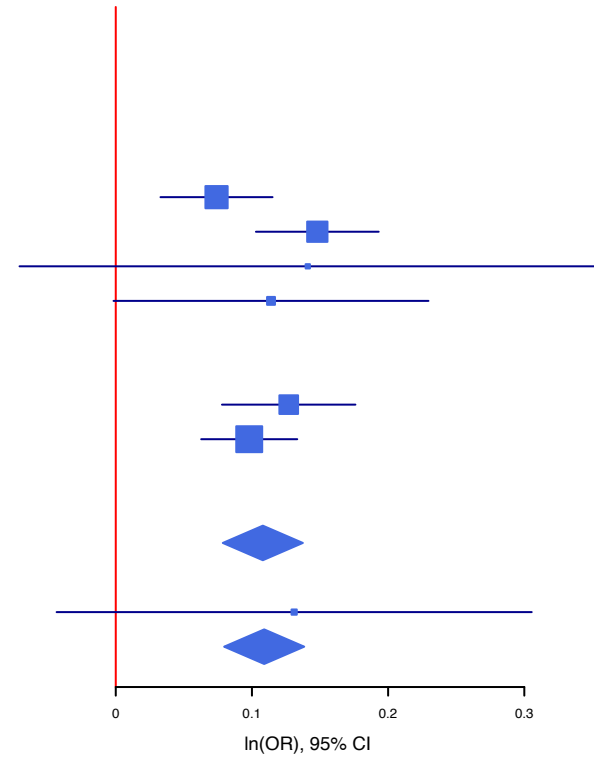

rs12925872                    C/T                    16:13752356  
 +++                    het\_P:                    0.902    het\_I:                    0.0

|                                                    | ngt      | info        | p_value         | f_ca(n)             | f_co(n)              | ln(OR)        | STDerr       |
|----------------------------------------------------|----------|-------------|-----------------|---------------------|----------------------|---------------|--------------|
| PGC_SCZ wave3 eur only                             | 0        | 0.99        | 7.1e-11         | 0.758(53386)        | 0.771(77258)         | -0.066        | 0.01         |
| PGC_SCZ wave3 asn only                             | 0        | 0.99        | 0.00829         | 0.887(14004)        | 0.894(16757)         | -0.072        | 0.027        |
| PGC_SCZ afram only                                 | -        | 1.00        | 0.0401          | -(6152)             | 0.834(3918)          | -0.081        | 0.04         |
| PGC_SCZ latino only                                | -        | 1.00        | 0.463           | -(1234)             | 0.834(3090)          | -0.048        | 0.066        |
| PGC_SCZ wave2 only                                 | 0        | 0.99        | 1.43e-08        | 0.763(34850)        | 0.771(44347)         | -0.073        | 0.013        |
| PGC_SCZ wave3 (excl. wave2)                        | 0        | 0.99        | 2.44e-06        | 0.818(39926)        | 0.818(56676)         | -0.062        | 0.013        |
| <b>PGC_SCZ wave3 (incl. wave2)</b>                 | <b>0</b> | <b>0.99</b> | <b>1.87e-13</b> | <b>0.797(74776)</b> | <b>0.801(101023)</b> | <b>-0.067</b> | <b>0.009</b> |
| Decode – Replication                               | -        | 1.00        | 0.474           | 0.735(1979)         | 0.741(142627)        | -0.033        | 0.046        |
| <b>PGC_SCZ wave3 (incl. wave2 and replication)</b> | <b>0</b> | <b>1.00</b> | <b>1.44e-13</b> | <b>0.796(76755)</b> | <b>0.768(243650)</b> | <b>-0.066</b> | <b>0.009</b> |

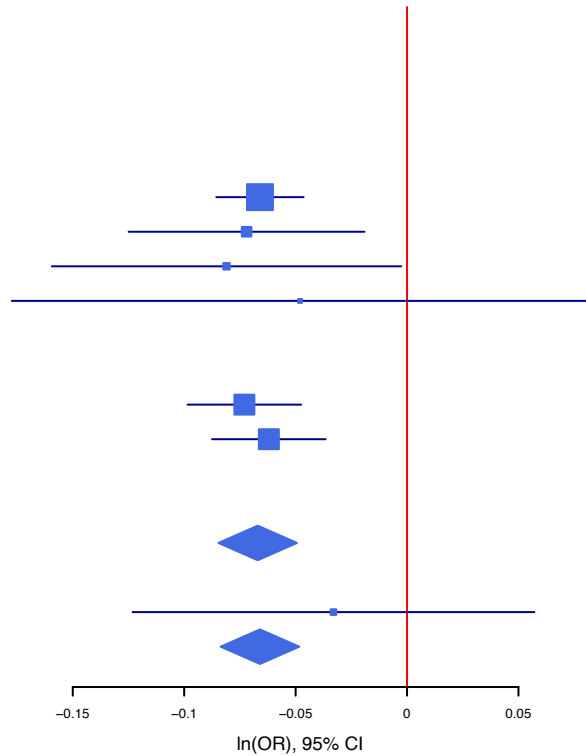

rs68002929                    T/A                    2:146419989  
 +++                    het\_P:                    0.905    het\_I:                    0.0

|                                                    | ngt      | info        | p_value         | f_ca(n)             | f_co(n)              | ln(OR)        | STDerr      |
|----------------------------------------------------|----------|-------------|-----------------|---------------------|----------------------|---------------|-------------|
| PGC_SCZ wave3 eur only                             | 5        | 0.98        | 2.23e-09        | 0.819(53386)        | 0.829(77258)         | -0.068        | 0.011       |
| PGC_SCZ wave3 asn only                             | 0        | 0.96        | 0.00143         | 0.895(14004)        | 0.901(16757)         | -0.091        | 0.028       |
| PGC_SCZ afram only                                 | -        | 0.97        | 0.0168          | -(6152)             | 0.751(3918)          | -0.082        | 0.034       |
| PGC_SCZ latino only                                | -        | 0.97        | 0.238           | -(1234)             | 0.906(3090)          | -0.099        | 0.084       |
| PGC_SCZ wave2 only                                 | 0        | 0.98        | 8.17e-07        | 0.825(34850)        | 0.835(44347)         | -0.071        | 0.014       |
| PGC_SCZ wave3 (excl. wave2)                        | 5        | 0.97        | 1.23e-07        | 0.839(39926)        | 0.842(56676)         | -0.074        | 0.014       |
| <b>PGC_SCZ wave3 (incl. wave2)</b>                 | <b>5</b> | <b>0.98</b> | <b>5.52e-13</b> | <b>0.833(74776)</b> | <b>0.84(101023)</b>  | <b>-0.072</b> | <b>0.01</b> |
| Decode – Replication                               | -        | 1.00        | 0.095           | 0.845(1979)         | 0.819(142627)        | -0.082        | 0.049       |
| <b>PGC_SCZ wave3 (incl. wave2 and replication)</b> | <b>5</b> | <b>0.99</b> | <b>1.75e-13</b> | <b>0.833(76755)</b> | <b>0.828(243650)</b> | <b>-0.073</b> | <b>0.01</b> |

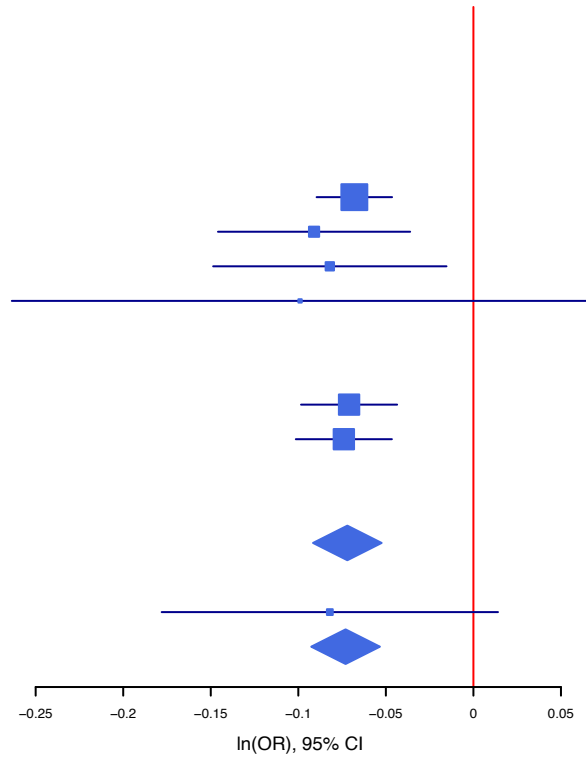



rs7238071                    A/G                    18:77579812  
 ---                    het\_P:                    0.241    het\_I:                    29.6

|                                                    | ngt       | info        | p_value         | f_ca(n)             | f_co(n)              | ln(OR)        | STDerr       |
|----------------------------------------------------|-----------|-------------|-----------------|---------------------|----------------------|---------------|--------------|
| PGC_SCZ wave3 eur only                             | 19        | 0.99        | 1.74e-10        | 0.713(53386)        | 0.726(77258)         | -0.061        | 0.01         |
| PGC_SCZ wave3 asn only                             | 4         | 0.95        | 0.000114        | 0.572(14004)        | 0.589(16757)         | -0.068        | 0.018        |
| PGC_SCZ afram only                                 | -         | 0.97        | 0.901           | -(6152)             | 0.78(3918)           | -0.004        | 0.036        |
| PGC_SCZ latino only                                | -         | 0.99        | 0.557           | -(1234)             | 0.582(3090)          | -0.03         | 0.051        |
| PGC_SCZ wave2 only                                 | 19        | 0.99        | 8.57e-06        | 0.706(34850)        | 0.723(44347)         | -0.054        | 0.012        |
| PGC_SCZ wave3 (excl. wave2)                        | 4         | 0.97        | 6.78e-09        | 0.668(39926)        | 0.682(56676)         | -0.064        | 0.011        |
| <b>PGC_SCZ wave3 (incl. wave2)</b>                 | <b>23</b> | <b>0.98</b> | <b>2.48e-13</b> | <b>0.683(74776)</b> | <b>0.698(101023)</b> | <b>-0.059</b> | <b>0.008</b> |
| Decode – Replication                               | -         | 1.00        | 0.293           | 0.715(1979)         | 0.726(142627)        | -0.044        | 0.041        |
| <b>PGC_SCZ wave3 (incl. wave2 and replication)</b> | <b>23</b> | <b>0.99</b> | <b>1.8e-13</b>  | <b>0.684(76755)</b> | <b>0.714(243650)</b> | <b>-0.058</b> | <b>0.008</b> |

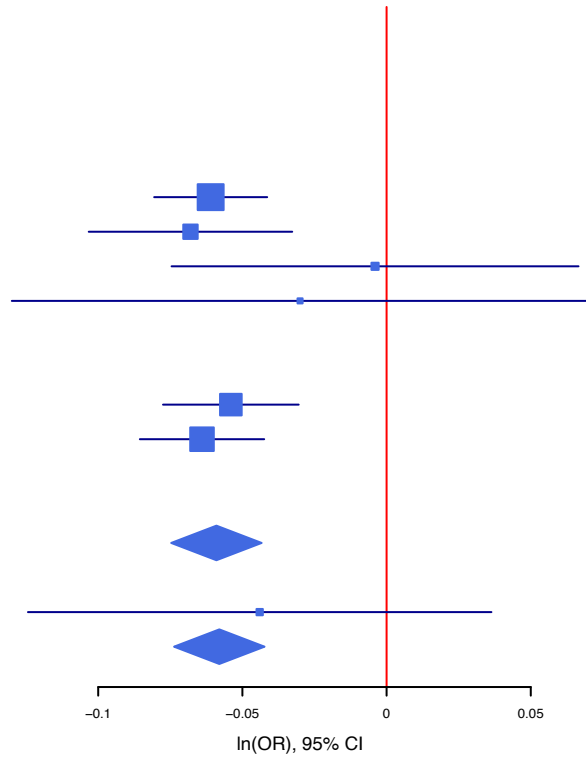

| rs893949                                           | C/T       |             | 11:134296384    |                     | het_P:               | 0.682        | het_I:       | 0.0 |
|----------------------------------------------------|-----------|-------------|-----------------|---------------------|----------------------|--------------|--------------|-----|
|                                                    | ngt       | info        | p_value         | f_ca(n)             |                      |              |              |     |
| PGC_SCZ wave3 eur only                             | 39        | 0.99        | 1.64e-12        | 0.472(53386)        | 0.458(77258)         | 0.061        | 0.009        |     |
| PGC_SCZ wave3 asn only                             | 6         | 0.92        | 0.648           | 0.277(14004)        | 0.274(16757)         | 0.009        | 0.02         |     |
| PGC_SCZ afram only                                 | -         | 0.94        | 0.0476          | -(6152)             | 0.438(3918)          | 0.06         | 0.03         |     |
| PGC_SCZ latino only                                | -         | 1.01        | 0.0617          | -(1234)             | 0.325(3090)          | 0.098        | 0.053        |     |
| PGC_SCZ wave2 only                                 | 29        | 0.99        | 6.94e-06        | 0.459(34850)        | 0.452(44347)         | 0.049        | 0.011        |     |
| PGC_SCZ wave3 (excl. wave2)                        | 16        | 0.97        | 2.34e-08        | 0.394(39926)        | 0.396(56676)         | 0.059        | 0.011        |     |
| <b>PGC_SCZ wave3 (incl. wave2)</b>                 | <b>45</b> | <b>0.98</b> | <b>7.28e-13</b> | <b>0.419(74776)</b> | <b>0.417(101023)</b> | <b>0.054</b> | <b>0.008</b> |     |
| Decode – Replication                               | -         | 1.00        | 0.102           | 0.448(1979)         | 0.465(142627)        | 0.062        | 0.038        |     |
| <b>PGC_SCZ wave3 (incl. wave2 and replication)</b> | <b>45</b> | <b>0.99</b> | <b>2.37e-13</b> | <b>0.42(76755)</b>  | <b>0.443(243650)</b> | <b>0.055</b> | <b>0.008</b> |     |

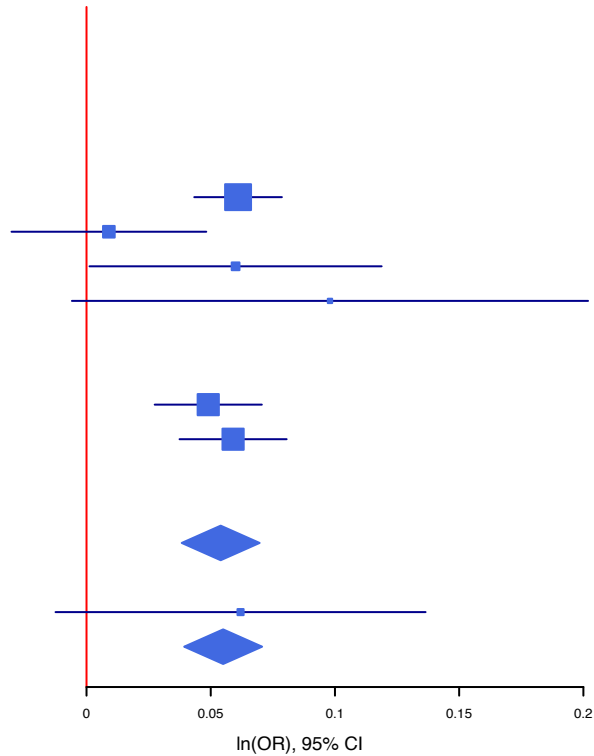

| rs7807720                                          | A/G      |             | 7:110073755     |                     | het_P:               | 0.903        | het_I:       | 0.0 |
|----------------------------------------------------|----------|-------------|-----------------|---------------------|----------------------|--------------|--------------|-----|
|                                                    | ngt      | info        | p_value         | f_ca(n)             |                      |              |              |     |
| PGC_SCZ wave3 eur only                             | 0        | 1.00        | 1.42e-09        | 0.635(53386)        | 0.619(77258)         | 0.054        | 0.009        |     |
| PGC_SCZ wave3 asn only                             | 0        | 0.97        | 0.00409         | 0.822(14004)        | 0.816(16757)         | 0.064        | 0.022        |     |
| PGC_SCZ afram only                                 | -        | 0.97        | 0.088           | -(6152)             | 0.738(3918)          | 0.057        | 0.034        |     |
| PGC_SCZ latino only                                | -        | 1.00        | 0.127           | -(1234)             | 0.626(3090)          | 0.079        | 0.052        |     |
| PGC_SCZ wave2 only                                 | 0        | 1.00        | 1.35e-06        | 0.643(34850)        | 0.619(44347)         | 0.054        | 0.011        |     |
| PGC_SCZ wave3 (excl. wave2)                        | 0        | 0.99        | 2.75e-07        | 0.697(39926)        | 0.684(56676)         | 0.057        | 0.011        |     |
| <b>PGC_SCZ wave3 (incl. wave2)</b>                 | <b>0</b> | <b>0.99</b> | <b>2.06e-12</b> | <b>0.676(74776)</b> | <b>0.659(101023)</b> | <b>0.056</b> | <b>0.008</b> |     |
| Decode – Replication                               | -        | 1.00        | 0.0298          | 0.623(1979)         | 0.58(142627)         | 0.085        | 0.039        |     |
| <b>PGC_SCZ wave3 (incl. wave2 and replication)</b> | <b>0</b> | <b>1.00</b> | <b>3.04e-13</b> | <b>0.675(76755)</b> | <b>0.616(243650)</b> | <b>0.057</b> | <b>0.008</b> |     |

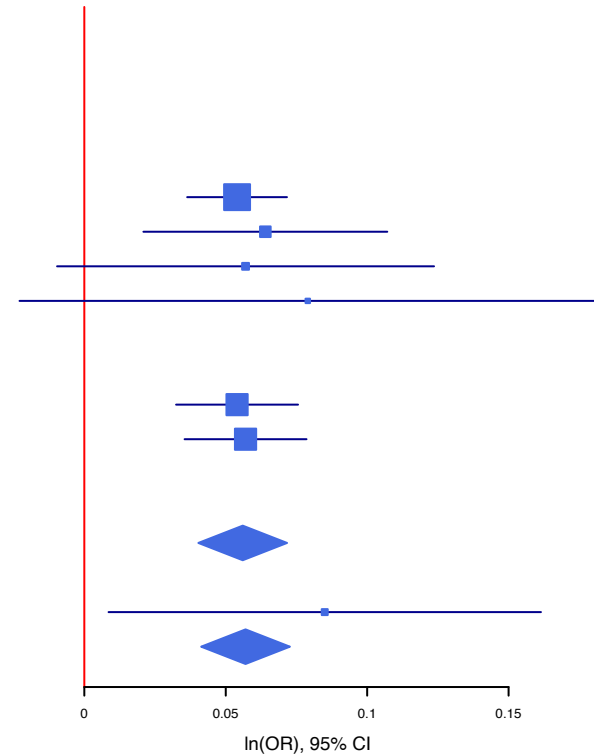

| rs35360904                                         | T/G      |             | 18:52751297     |                     |                      |              |              |
|----------------------------------------------------|----------|-------------|-----------------|---------------------|----------------------|--------------|--------------|
|                                                    | +++      | het_P:      | 0.662           | het_I:              | 0.0                  |              |              |
|                                                    | ngt      | info        | p_value         | f_ca(n)             | f_co(n)              | ln(OR)       | STDerr       |
| PGC_SCZ wave3 eur only                             | 0        | 1.01        | 8.95e-14        | 0.605(53386)        | 0.588(77258)         | 0.065        | 0.009        |
| PGC_SCZ wave3 asn only                             | 0        | 0.98        | 0.532           | 0.406(14004)        | 0.398(16757)         | 0.011        | 0.018        |
| PGC_SCZ afram only                                 | -        | 1.01        | 0.0182          | -(6152)             | 0.652(3918)          | 0.072        | 0.03         |
| PGC_SCZ latino only                                | -        | 1.02        | 0.0664          | -(1234)             | 0.575(3090)          | 0.092        | 0.05         |
| PGC_SCZ wave2 only                                 | 0        | 1.00        | 2e-09           | 0.594(34850)        | 0.584(44347)         | 0.066        | 0.011        |
| PGC_SCZ wave3 (excl. wave2)                        | 0        | 1.01        | 2.87e-06        | 0.564(39926)        | 0.553(56676)         | 0.048        | 0.01         |
| <b>PGC_SCZ wave3 (incl. wave2)</b>                 | <b>0</b> | <b>1.00</b> | <b>5.4e-14</b>  | <b>0.576(74776)</b> | <b>0.565(101023)</b> | <b>0.056</b> | <b>0.008</b> |
| Decode – Replication                               | -        | 1.00        | 0.657           | 0.612(1979)         | 0.613(142627)        | -0.017       | 0.039        |
| <b>PGC_SCZ wave3 (incl. wave2 and replication)</b> | <b>0</b> | <b>1.00</b> | <b>3.53e-13</b> | <b>0.577(76755)</b> | <b>0.592(243650)</b> | <b>0.054</b> | <b>0.007</b> |

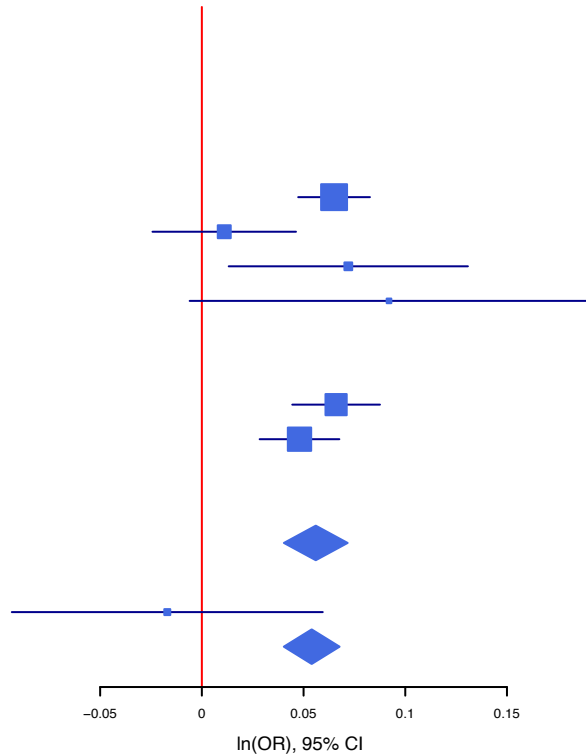

| rs12541                                            | T/C       |             | 11:124623492    |                     |                      |              |              |
|----------------------------------------------------|-----------|-------------|-----------------|---------------------|----------------------|--------------|--------------|
|                                                    | ++        | +-          | het_P:          | 0.17                | het_I:               | 43.5         |              |
|                                                    | ngt       | info        | p_value         | f_ca(n)             | f_co(n)              | ln(OR)       | STDerr       |
| PGC_SCZ wave3 eur only                             | 74        | 1.00        | 1.24e-11        | 0.786(53386)        | 0.771(77258)         | 0.07         | 0.01         |
| PGC_SCZ wave3 asn only                             | 10        | 0.99        | 0.00219         | 0.742(14004)        | 0.735(16757)         | 0.06         | 0.019        |
| PGC_SCZ afram only                                 | -         | 1.00        | 0.261           | -(6152)             | 0.291(3918)          | 0.037        | 0.033        |
| PGC_SCZ latino only                                | -         | 1.00        | 0.453           | -(1234)             | 0.862(3090)          | -0.053       | 0.071        |
| PGC_SCZ wave2 only                                 | 42        | 1.00        | 2.3e-06         | 0.781(34850)        | 0.769(44347)         | 0.061        | 0.013        |
| PGC_SCZ wave3 (excl. wave2)                        | 42        | 1.00        | 2.48e-08        | 0.695(39926)        | 0.705(56676)         | 0.066        | 0.012        |
| <b>PGC_SCZ wave3 (incl. wave2)</b>                 | <b>84</b> | <b>1.00</b> | <b>3.77e-13</b> | <b>0.729(74776)</b> | <b>0.73(101023)</b>  | <b>0.064</b> | <b>0.009</b> |
| Decode – Replication                               | -         | 1.00        | 0.516           | 0.788(1979)         | 0.778(142627)        | 0.031        | 0.047        |
| <b>PGC_SCZ wave3 (incl. wave2 and replication)</b> | <b>84</b> | <b>1.00</b> | <b>3.95e-13</b> | <b>0.73(76755)</b>  | <b>0.757(243650)</b> | <b>0.063</b> | <b>0.009</b> |

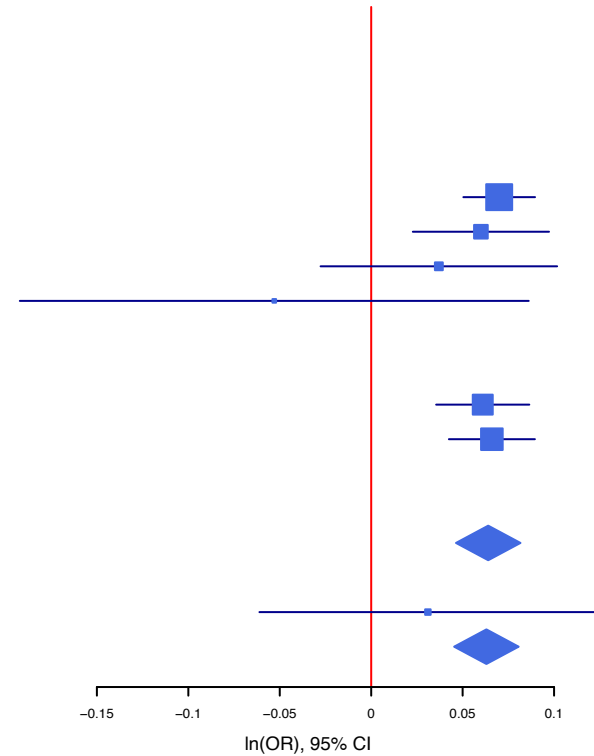

rs4759374                    T/G                    12:123782957  
 -??                    het\_P:                    1.0    het\_I:                    0.0

|                                                    | ngt      | info        | p_value         | f_ca(n)             | f_co(n)              | ln(OR)        | STDerr       |
|----------------------------------------------------|----------|-------------|-----------------|---------------------|----------------------|---------------|--------------|
| PGC_SCZ wave3 eur only                             | 0        | 1.00        | 0.000569        | 0.96(53386)         | 0.964(77258)         | -0.077        | 0.022        |
| PGC_SCZ wave3 asn only                             | 0        | 1.00        | 1.94e-11        | 0.723(14004)        | 0.746(16757)         | -0.129        | 0.019        |
| PGC_SCZ wave2 only                                 | 0        | 1.00        | 0.000189        | 0.949(34850)        | 0.96(44347)          | -0.099        | 0.027        |
| PGC_SCZ wave3 (excl. wave2)                        | 0        | 1.00        | 2.48e-10        | 0.87(39926)         | 0.893(56676)         | -0.11         | 0.017        |
| <b>PGC_SCZ wave3 (incl. wave2)</b>                 | <b>0</b> | <b>1.00</b> | <b>2.33e-13</b> | <b>0.911(74776)</b> | <b>0.925(101023)</b> | <b>-0.107</b> | <b>0.015</b> |
| Decode - Replication                               | -        | 1.00        | 0.855           | 0.951(1979)         | 0.949(142627)        | 0.02          | 0.109        |
| <b>PGC_SCZ wave3 (incl. wave2 and replication)</b> | <b>0</b> | <b>1.00</b> | <b>4.53e-13</b> | <b>0.912(76755)</b> | <b>0.94(243650)</b>  | <b>-0.105</b> | <b>0.014</b> |

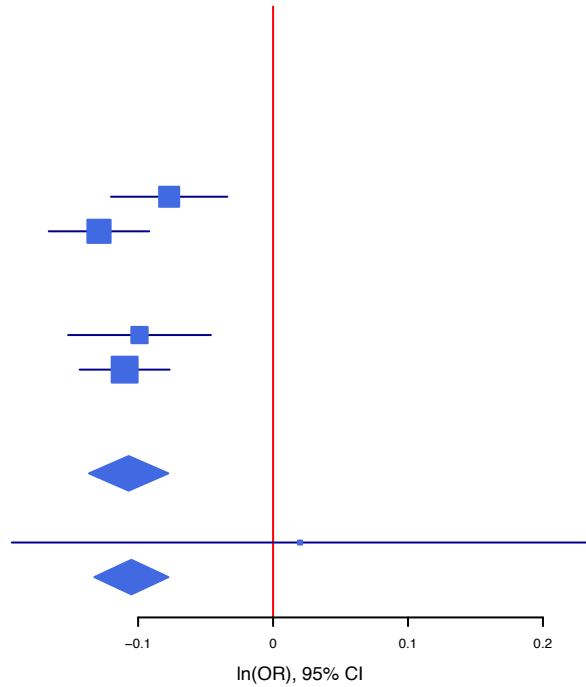

**rs61833239**                      **T/G**                      **1:244010441**  
 ---                                      het\_P:                      0.282    het\_I:                      21.0

|                                                    | ngt       | info        | p_value         | f_ca(n)             | f_co(n)              | ln(OR)        | STDerr       |
|----------------------------------------------------|-----------|-------------|-----------------|---------------------|----------------------|---------------|--------------|
| PGC_SCZ wave3 eur only                             | 17        | 0.78        | 2.8e-12         | 0.806(53386)        | 0.815(77258)         | -0.086        | 0.012        |
| PGC_SCZ wave3 asn only                             | 0         | 0.33        | 0.941           | 0.955(14004)        | 0.954(16757)         | 0.006         | 0.082        |
| PGC_SCZ afram only                                 | -         | 0.67        | 0.355           | -(6152)             | 0.966(3918)          | -0.094        | 0.101        |
| PGC_SCZ latino only                                | -         | 0.66        | 0.0151          | -(1234)             | 0.906(3090)          | -0.247        | 0.102        |
| PGC_SCZ wave2 only                                 | 0         | 0.73        | 1.23e-08        | 0.814(34850)        | 0.818(44347)         | -0.093        | 0.016        |
| PGC_SCZ wave3 (excl. wave2)                        | 17        | 0.70        | 8.89e-06        | 0.886(39926)        | 0.876(56676)         | -0.079        | 0.018        |
| <b>PGC_SCZ wave3 (incl. wave2)</b>                 | <b>17</b> | <b>0.71</b> | <b>5.65e-13</b> | <b>0.855(74776)</b> | <b>0.851(101023)</b> | <b>-0.087</b> | <b>0.012</b> |
| Decode – Replication                               | -         | 0.99        | 0.466           | 0.821(1979)         | 0.816(142627)        | -0.036        | 0.049        |
| <b>PGC_SCZ wave3 (incl. wave2 and replication)</b> | <b>17</b> | <b>0.87</b> | <b>6.39e-13</b> | <b>0.854(76755)</b> | <b>0.832(243650)</b> | <b>-0.084</b> | <b>0.012</b> |

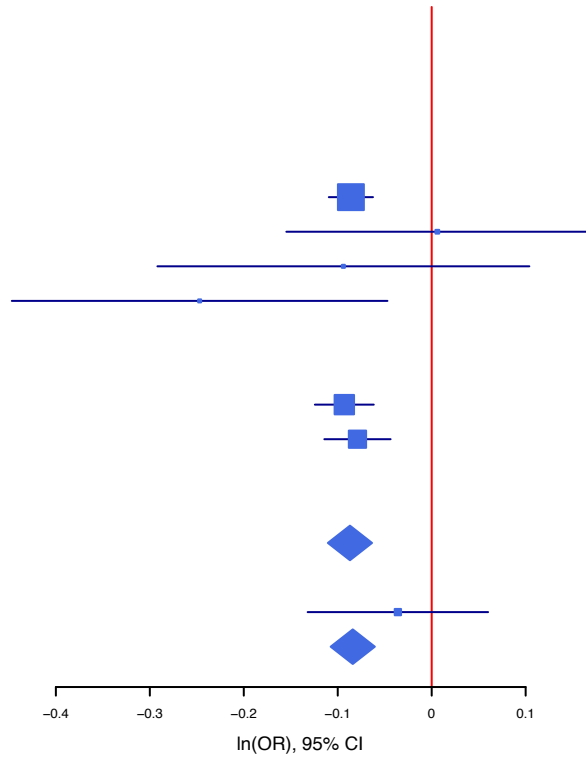

**rs5751191**                      **T/C**                      **22:42370991**  
 --+                                      het\_P:                      0.037    het\_I:                      69.7

|                        | ngt | info | p_value | f_ca(n)      | f_co(n)      | ln(OR) | STDerr |
|------------------------|-----|------|---------|--------------|--------------|--------|--------|
| PGC_SCZ wave3 eur only | 48  | 0.99 | 3e-14   | 0.484(53386) | 0.499(77258) | -0.066 | 0.009  |
| PGC_SCZ wave3 asn only | 6   | 0.98 | 0.601   | 0.163(14004) | 0.16(16757)  | -0.012 | 0.023  |
| PGC_SCZ afram only     | -   | 1.02 | 0.645   | -(6152)      | 0.697(3918)  | 0.015  | 0.032  |
| PGC_SCZ latino only    | -   | 1.02 | 0.857   | -(1234)      | 0.647(3090)  | 0.009  | 0.052  |

|                             |    |      |          |              |              |        |       |
|-----------------------------|----|------|----------|--------------|--------------|--------|-------|
| PGC_SCZ wave2 only          | 14 | 0.98 | 4.04e-09 | 0.466(34850) | 0.491(44347) | -0.065 | 0.011 |
| PGC_SCZ wave3 (excl. wave2) | 40 | 1.00 | 0.000133 | 0.486(39926) | 0.476(56676) | -0.042 | 0.011 |

|                                                    |           |             |                 |                     |                      |               |              |
|----------------------------------------------------|-----------|-------------|-----------------|---------------------|----------------------|---------------|--------------|
| <b>PGC_SCZ wave3 (incl. wave2)</b>                 | <b>54</b> | <b>0.99</b> | <b>6.92e-12</b> | <b>0.478(74776)</b> | <b>0.482(101023)</b> | <b>-0.053</b> | <b>0.008</b> |
| Decode – Replication                               | -         | 1.00        | 0.0182          | 0.495(1979)         | 0.49(142627)         | -0.089        | 0.038        |
| <b>PGC_SCZ wave3 (incl. wave2 and replication)</b> | <b>54</b> | <b>1.00</b> | <b>8.22e-13</b> | <b>0.478(76755)</b> | <b>0.487(243650)</b> | <b>-0.055</b> | <b>0.008</b> |

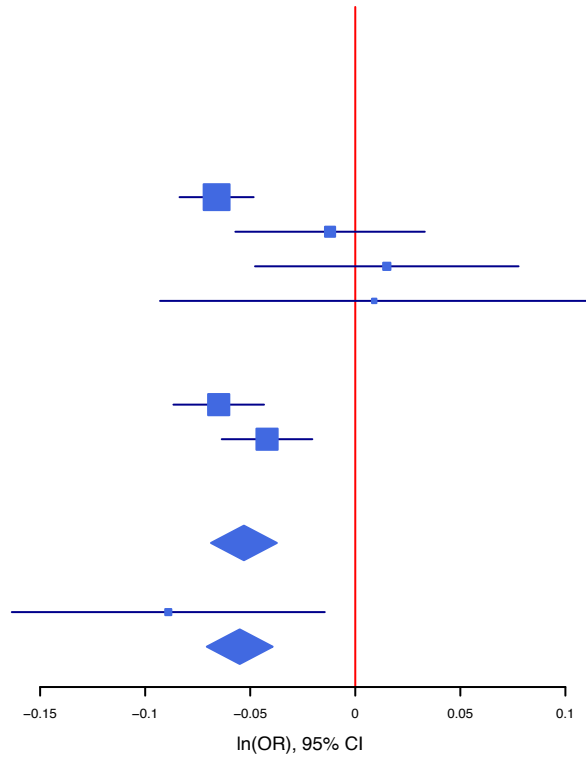



| rs715170                                           | C/T      |             | 18:53795514     |                     | het_P:               | 0.079        | het_I:       | 60.6 |
|----------------------------------------------------|----------|-------------|-----------------|---------------------|----------------------|--------------|--------------|------|
|                                                    | ngt      | info        | p_value         | f_ca(n)             |                      |              |              |      |
| PGC_SCZ wave3 eur only                             | 8        | 0.99        | 1.77e-10        | 0.737(53386)        | 0.723(77258)         | 0.062        | 0.01         |      |
| PGC_SCZ wave3 asn only                             | 0        | 0.94        | 0.000839        | 0.84(14004)         | 0.826(16757)         | 0.079        | 0.024        |      |
| PGC_SCZ afram only                                 | -        | 0.98        | 0.31            | -(6152)             | 0.941(3918)          | -0.065       | 0.064        |      |
| PGC_SCZ latino only                                | -        | 1.02        | 0.919           | -(1234)             | 0.841(3090)          | -0.007       | 0.067        |      |
| PGC_SCZ wave2 only                                 | 1        | 0.99        | 2.87e-07        | 0.74(34850)         | 0.721(44347)         | 0.063        | 0.012        |      |
| PGC_SCZ wave3 (excl. wave2)                        | 7        | 0.98        | 4.28e-06        | 0.822(39926)        | 0.799(56676)         | 0.058        | 0.013        |      |
| <b>PGC_SCZ wave3 (incl. wave2)</b>                 | <b>8</b> | <b>0.98</b> | <b>5.11e-12</b> | <b>0.79(74776)</b>  | <b>0.769(101023)</b> | <b>0.061</b> | <b>0.009</b> |      |
| Decode – Replication                               | -        | 1.00        | 0.0965          | 0.703(1979)         | 0.714(142627)        | 0.073        | 0.044        |      |
| <b>PGC_SCZ wave3 (incl. wave2 and replication)</b> | <b>8</b> | <b>0.99</b> | <b>1.05e-12</b> | <b>0.788(76755)</b> | <b>0.738(243650)</b> | <b>0.061</b> | <b>0.009</b> |      |

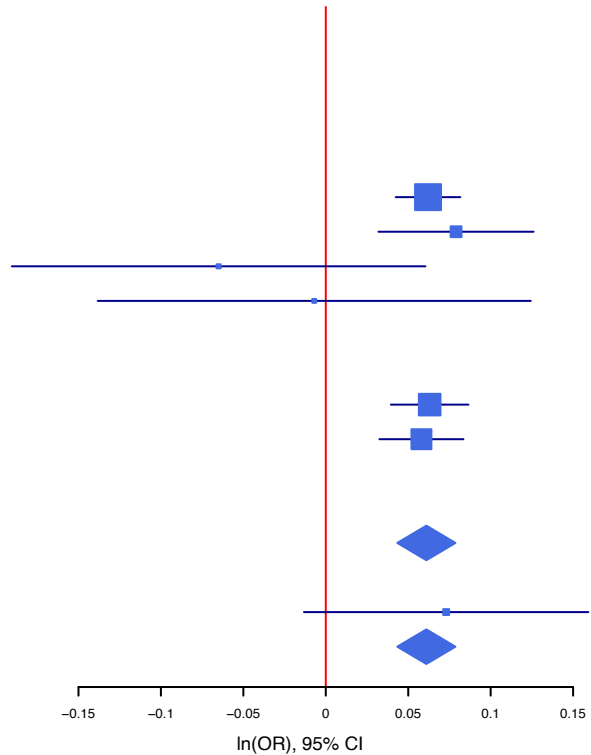

rs177001

A/G  
---  
5:152610561  
het\_P: 0.465 het\_I: 0.0

|                                                    | ngt       | info        | p_value         | f_ca(n)             | f_co(n)              | ln(OR)        | STDerr       |
|----------------------------------------------------|-----------|-------------|-----------------|---------------------|----------------------|---------------|--------------|
| PGC_SCZ wave3 eur only                             | 16        | 1.00        | 5.09e-10        | 0.489(53386)        | 0.506(77258)         | -0.053        | 0.009        |
| PGC_SCZ wave3 asn only                             | 3         | 0.97        | 0.00398         | 0.572(14004)        | 0.583(16757)         | -0.05         | 0.018        |
| PGC_SCZ afram only                                 | -         | 0.97        | 0.862           | -(6152)             | 0.208(3918)          | -0.006        | 0.037        |
| PGC_SCZ latino only                                | -         | 1.02        | 0.424           | -(1234)             | 0.681(3090)          | -0.042        | 0.053        |
| PGC_SCZ wave2 only                                 | 16        | 1.00        | 6.33e-08        | 0.497(34850)        | 0.512(44347)         | -0.058        | 0.011        |
| PGC_SCZ wave3 (excl. wave2)                        | 3         | 0.99        | 2.5e-05         | 0.487(39926)        | 0.502(56676)         | -0.044        | 0.01         |
| <b>PGC_SCZ wave3 (incl. wave2)</b>                 | <b>19</b> | <b>0.99</b> | <b>9.91e-12</b> | <b>0.491(74776)</b> | <b>0.506(101023)</b> | <b>-0.051</b> | <b>0.008</b> |
| Decode – Replication                               | -         | 1.00        | 0.0164          | 0.519(1979)         | 0.514(142627)        | -0.091        | 0.038        |
| <b>PGC_SCZ wave3 (incl. wave2 and replication)</b> | <b>19</b> | <b>1.00</b> | <b>1.16e-12</b> | <b>0.492(76755)</b> | <b>0.51(243650)</b>  | <b>-0.052</b> | <b>0.007</b> |

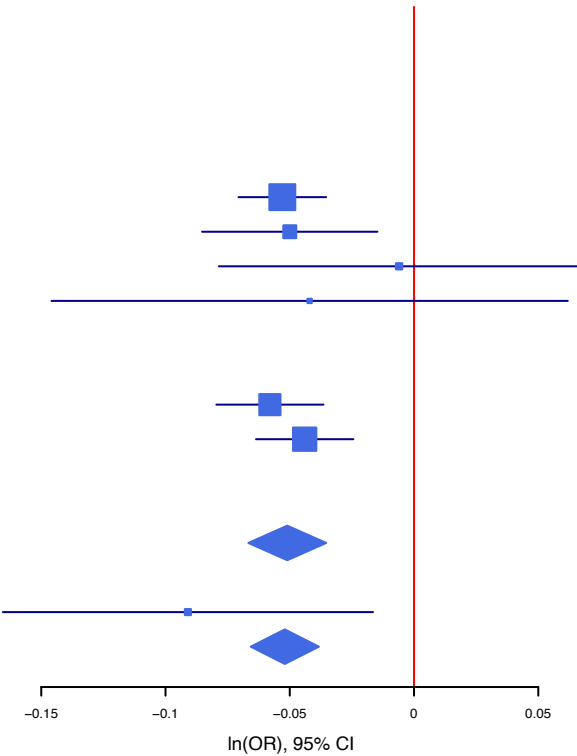

| rs13016542                                         | T/C       |             | 2:145183851     |                     | het_P:               | 0.116        | het_I:       | 53.5 |
|----------------------------------------------------|-----------|-------------|-----------------|---------------------|----------------------|--------------|--------------|------|
|                                                    | ++        | +-          | het_P:          | het_I:              |                      |              |              |      |
|                                                    | ngt       | info        | p_value         | f_ca(n)             | f_co(n)              | ln(OR)       | STDerr       |      |
| PGC_SCZ wave3 eur only                             | 30        | 0.98        | 8.28e-12        | 0.876(53386)        | 0.864(77258)         | 0.088        | 0.013        |      |
| PGC_SCZ wave3 asn only                             | 4         | 0.94        | 0.131           | 0.947(14004)        | 0.945(16757)         | 0.059        | 0.039        |      |
| PGC_SCZ afram only                                 | -         | 0.96        | 0.744           | -(6152)             | 0.959(3918)          | 0.024        | 0.075        |      |
| PGC_SCZ latino only                                | -         | 0.99        | 0.299           | -(1234)             | 0.93(3090)           | -0.098       | 0.094        |      |
| PGC_SCZ wave2 only                                 | 1         | 0.98        | 1.51e-07        | 0.878(34850)        | 0.865(44347)         | 0.086        | 0.016        |      |
| PGC_SCZ wave3 (excl. wave2)                        | 33        | 0.97        | 2.22e-05        | 0.92(39926)         | 0.906(56676)         | 0.075        | 0.018        |      |
| <b>PGC_SCZ wave3 (incl. wave2)</b>                 | <b>34</b> | <b>0.98</b> | <b>1.89e-11</b> | <b>0.904(74776)</b> | <b>0.89(101023)</b>  | <b>0.081</b> | <b>0.012</b> |      |
| Decode – Replication                               | -         | 1.00        | 0.017           | 0.866(1979)         | 0.859(142627)        | 0.13         | 0.054        |      |
| <b>PGC_SCZ wave3 (incl. wave2 and replication)</b> | <b>34</b> | <b>0.99</b> | <b>1.35e-12</b> | <b>0.903(76755)</b> | <b>0.873(243650)</b> | <b>0.083</b> | <b>0.012</b> |      |

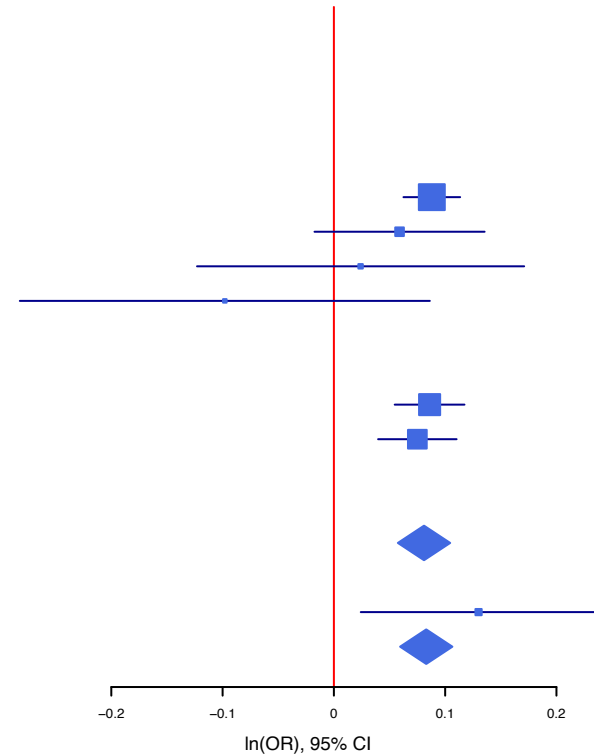

| rs3770752                                          | A/G       |             | 2:37576136      |                     | het_P:              | 0.262        | het_I:       | 25.4 |
|----------------------------------------------------|-----------|-------------|-----------------|---------------------|---------------------|--------------|--------------|------|
|                                                    | ngt       | info        | p_value         | f_ca(n)             |                     |              |              |      |
| PGC_SCZ wave3 eur only                             | 41        | 0.97        | 8.56e-09        | 0.656(53386)        | 0.641(77258)        | 0.053        | 0.009        |      |
| PGC_SCZ wave3 asn only                             | 5         | 0.91        | 0.000232        | 0.859(14004)        | 0.855(16757)        | 0.096        | 0.026        |      |
| PGC_SCZ afram only                                 | -         | 0.93        | 0.316           | -(6152)             | 0.916(3918)         | 0.056        | 0.056        |      |
| PGC_SCZ latino only                                | -         | 1.01        | 0.00877         | -(1234)             | 0.765(3090)         | 0.155        | 0.059        |      |
| PGC_SCZ wave2 only                                 | 12        | 0.96        | 0.000162        | 0.667(34850)        | 0.647(44347)        | 0.044        | 0.012        |      |
| PGC_SCZ wave3 (excl. wave2)                        | 34        | 0.96        | 4.61e-10        | 0.774(39926)        | 0.748(56676)        | 0.076        | 0.012        |      |
| <b>PGC_SCZ wave3 (incl. wave2)</b>                 | <b>46</b> | <b>0.96</b> | <b>1.74e-12</b> | <b>0.732(74776)</b> | <b>0.71(101023)</b> | <b>0.059</b> | <b>0.008</b> |      |
| Decode – Replication                               | -         | 1.00        | 0.382           | 0.635(1979)         | 0.62(142627)        | 0.035        | 0.04         |      |
| <b>PGC_SCZ wave3 (incl. wave2 and replication)</b> | <b>46</b> | <b>0.98</b> | <b>1.36e-12</b> | <b>0.73(76755)</b>  | <b>0.66(243650)</b> | <b>0.058</b> | <b>0.008</b> |      |

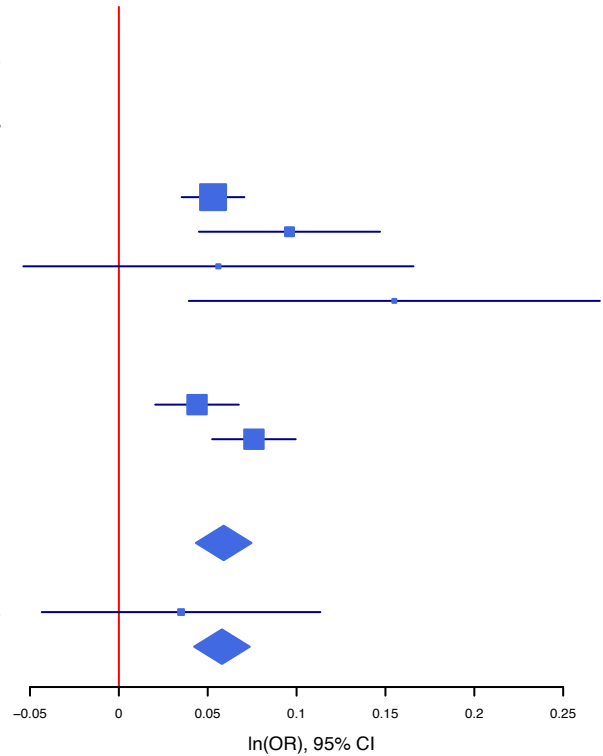

rs73229090 C/A 8:27442127

→→ het\_P: 0.181 het\_I: 41.4

|                                                    | ngt      | info        | p_value         | f_ca(n)             | f_co(n)              | ln(OR)       | STDerr       |
|----------------------------------------------------|----------|-------------|-----------------|---------------------|----------------------|--------------|--------------|
| PGC_SCZ wave3 eur only                             | 7        | 0.96        | 4.34e-13        | 0.897(53386)        | 0.888(77258)         | 0.103        | 0.014        |
| PGC_SCZ afram only                                 | -        | 0.97        | 0.616           | -(6152)             | 0.978(3918)          | -0.051       | 0.102        |
| PGC_SCZ latino only                                | -        | 0.95        | 0.824           | -(1234)             | 0.95(3090)           | -0.025       | 0.114        |
| PGC_SCZ wave2 only                                 | 0        | 0.96        | 1.26e-07        | 0.896(34850)        | 0.887(44347)         | 0.096        | 0.018        |
| PGC_SCZ wave3 (excl. wave2)                        | 7        | 0.96        | 3.6e-06         | 0.932(39926)        | 0.918(56676)         | 0.101        | 0.022        |
| <b>PGC_SCZ wave3 (incl. wave2)</b>                 | <b>7</b> | <b>0.96</b> | <b>2.44e-12</b> | <b>0.913(74776)</b> | <b>0.902(101023)</b> | <b>0.098</b> | <b>0.014</b> |
| Decode – Replication                               | -        | 1.00        | 0.284           | 0.892(1979)         | 0.887(142627)        | 0.069        | 0.064        |
| <b>PGC_SCZ wave3 (incl. wave2 and replication)</b> | <b>7</b> | <b>0.98</b> | <b>1.75e-12</b> | <b>0.913(76755)</b> | <b>0.894(243650)</b> | <b>0.097</b> | <b>0.014</b> |

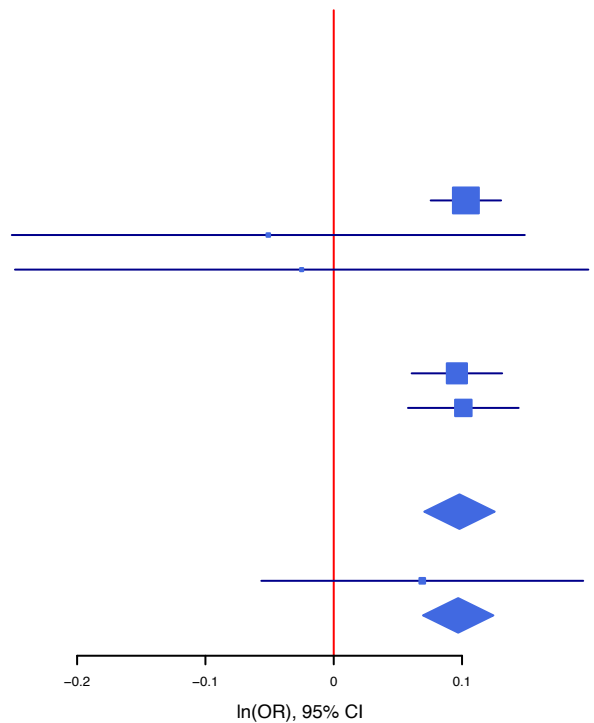

rs2494638                    **G/C**                    **1:2372133**  
 +??                    het\_P:                    1.0    het\_I:                    0.0

|                                                    | ngt      | info        | p_value         | f_ca(n)             | f_co(n)              | ln(OR)        | STDerr      |
|----------------------------------------------------|----------|-------------|-----------------|---------------------|----------------------|---------------|-------------|
| PGC_SCZ wave3 eur only                             | 0        | 0.72        | 2.21e-11        | 0.39(53386)         | 0.402(77258)         | -0.069        | 0.01        |
| PGC_SCZ wave3 asn only                             | 0        | 0.66        | 0.02            | 0.144(14004)        | 0.159(16757)         | -0.071        | 0.031       |
| PGC_SCZ wave2 only                                 | 0        | 0.70        | 2.49e-07        | 0.375(34850)        | 0.395(44347)         | -0.069        | 0.013       |
| PGC_SCZ wave3 (excl. wave2)                        | 0        | 0.72        | 1.2e-06         | 0.3(39926)          | 0.326(56676)         | -0.07         | 0.014       |
| <b>PGC_SCZ wave3 (incl. wave2)</b>                 | <b>0</b> | <b>0.71</b> | <b>1.23e-12</b> | <b>0.339(74776)</b> | <b>0.359(101023)</b> | <b>-0.07</b>  | <b>0.01</b> |
| Decode - Replication                               | -        | 0.84        | 0.785           | 0.447(1979)         | 0.385(142627)        | -0.013        | 0.048       |
| <b>PGC_SCZ wave3 (incl. wave2 and replication)</b> | <b>0</b> | <b>0.79</b> | <b>2.3e-12</b>  | <b>0.342(76755)</b> | <b>0.375(243650)</b> | <b>-0.067</b> | <b>0.01</b> |

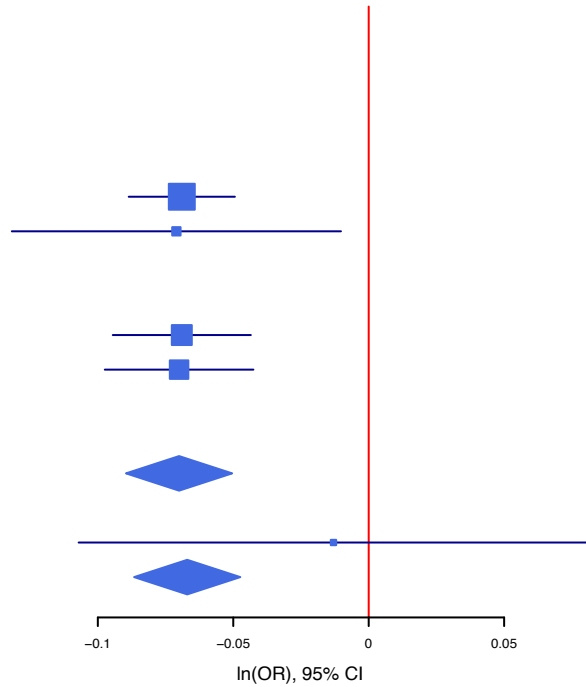

**rs11711948**                      **A/G**                      **3:181188505**  
 +-+                      het\_P:                      0.074    het\_I:    61.6

|                                                    | ngt      | info        | p_value         | f_ca(n)             | f_co(n)              | ln(OR)       | STDerr      |
|----------------------------------------------------|----------|-------------|-----------------|---------------------|----------------------|--------------|-------------|
| PGC_SCZ wave3 eur only                             | 0        | 0.99        | 1.06e-09        | 0.833(53386)        | 0.826(77258)         | 0.07         | 0.012       |
| PGC_SCZ wave3 asn only                             | 0        | 0.96        | 0.000162        | 0.877(14004)        | 0.864(16757)         | 0.099        | 0.026       |
| PGC_SCZ afram only                                 | -        | 0.94        | 0.0412          | -(6152)             | 0.647(3918)          | 0.064        | 0.032       |
| PGC_SCZ latino only                                | -        | 0.97        | 0.315           | -(1234)             | 0.735(3090)          | -0.058       | 0.057       |
| PGC_SCZ wave2 only                                 | 0        | 0.99        | 2.68e-06        | 0.84(34850)         | 0.831(44347)         | 0.069        | 0.015       |
| PGC_SCZ wave3 (excl. wave2)                        | 0        | 0.97        | 1.01e-07        | 0.784(39926)        | 0.79(56676)          | 0.071        | 0.013       |
| <b>PGC_SCZ wave3 (incl. wave2)</b>                 | <b>0</b> | <b>0.98</b> | <b>1.07e-12</b> | <b>0.806(74776)</b> | <b>0.806(101023)</b> | <b>0.07</b>  | <b>0.01</b> |
| Decode – Replication                               | -        | 1.00        | 0.939           | 0.817(1979)         | 0.819(142627)        | 0.004        | 0.049       |
| <b>PGC_SCZ wave3 (incl. wave2 and replication)</b> | <b>0</b> | <b>0.99</b> | <b>2.43e-12</b> | <b>0.806(76755)</b> | <b>0.813(243650)</b> | <b>0.067</b> | <b>0.01</b> |

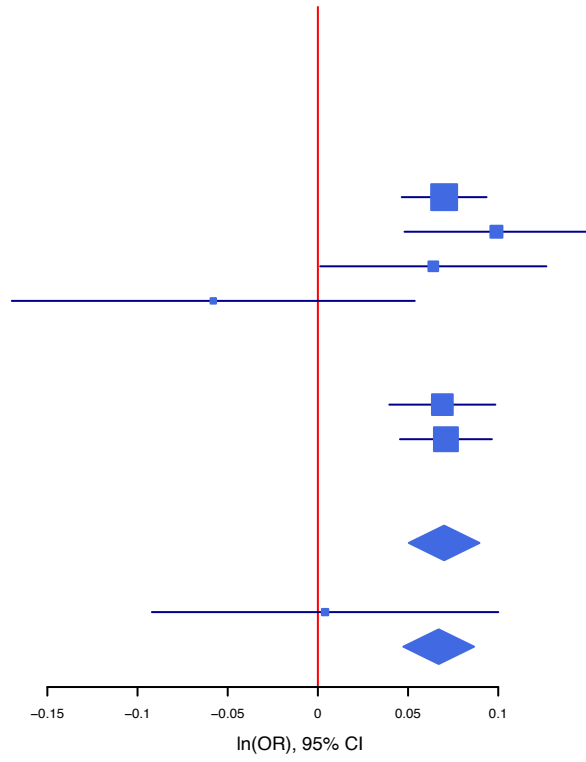

rs4658401                      G/T                      1:243803979  
 +++                                      het\_P:                      0.114    het\_I:                      54.0

|                                                    | ngt      | info        | p_value         | f_ca(n)             | f_co(n)              | ln(OR)        | STDerr       |
|----------------------------------------------------|----------|-------------|-----------------|---------------------|----------------------|---------------|--------------|
| PGC_SCZ wave3 eur only                             | 0        | 1.00        | 5.13e-08        | 0.309(53386)        | 0.318(77258)         | -0.051        | 0.009        |
| PGC_SCZ wave3 asn only                             | 0        | 1.00        | 0.00478         | 0.513(14004)        | 0.523(16757)         | -0.048        | 0.017        |
| PGC_SCZ afram only                                 | -        | 0.99        | 0.0252          | -(6152)             | 0.834(3918)          | -0.094        | 0.042        |
| PGC_SCZ latino only                                | -        | 1.03        | 0.00401         | -(1234)             | 0.442(3090)          | -0.143        | 0.05         |
| PGC_SCZ wave2 only                                 | 0        | 1.00        | 3.16e-06        | 0.318(34850)        | 0.323(44347)         | -0.054        | 0.012        |
| PGC_SCZ wave3 (excl. wave2)                        | 0        | 1.00        | 6.28e-07        | 0.487(39926)        | 0.46(56676)          | -0.053        | 0.011        |
| <b>PGC_SCZ wave3 (incl. wave2)</b>                 | <b>0</b> | <b>1.00</b> | <b>6.97e-12</b> | <b>0.42(74776)</b>  | <b>0.408(101023)</b> | <b>-0.054</b> | <b>0.008</b> |
| Decode – Replication                               | -        | 1.00        | 0.107           | 0.343(1979)         | 0.338(142627)        | -0.064        | 0.04         |
| <b>PGC_SCZ wave3 (incl. wave2 and replication)</b> | <b>0</b> | <b>1.00</b> | <b>2.46e-12</b> | <b>0.418(76755)</b> | <b>0.369(243650)</b> | <b>-0.054</b> | <b>0.008</b> |

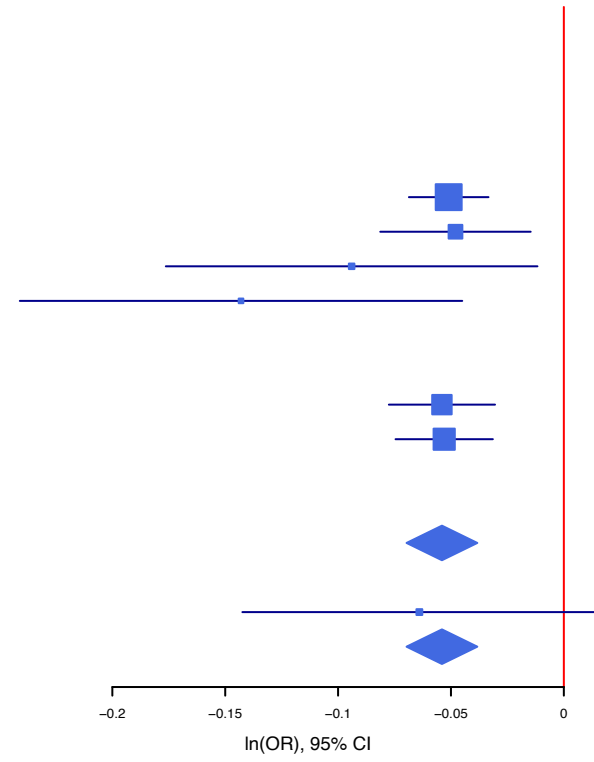



| rs505061                                           | C/A       |             | 9:22767164      |                     | 0.945                | het_I:        | 0.0          |
|----------------------------------------------------|-----------|-------------|-----------------|---------------------|----------------------|---------------|--------------|
|                                                    | +++       | het_P:      |                 |                     |                      |               |              |
|                                                    | ngt       | info        | p_value         | f_ca(n)             | f_co(n)              | ln(OR)        | STDerr       |
| PGC_SCZ wave3 eur only                             | 23        | 1.00        | 5.8e-10         | 0.495(53386)        | 0.512(77258)         | -0.053        | 0.009        |
| PGC_SCZ wave3 asn only                             | 4         | 0.97        | 0.0394          | 0.543(14004)        | 0.555(16757)         | -0.036        | 0.017        |
| PGC_SCZ afram only                                 | -         | 1.00        | 0.0645          | -(6152)             | 0.373(3918)          | -0.056        | 0.03         |
| PGC_SCZ latino only                                | -         | 1.01        | 0.471           | -(1234)             | 0.424(3090)          | -0.036        | 0.05         |
| PGC_SCZ wave2 only                                 | 15        | 0.99        | 5.09e-07        | 0.498(34850)        | 0.512(44347)         | -0.055        | 0.011        |
| PGC_SCZ wave3 (excl. wave2)                        | 12        | 1.00        | 5.31e-06        | 0.467(39926)        | 0.488(56676)         | -0.046        | 0.01         |
| <b>PGC_SCZ wave3 (incl. wave2)</b>                 | <b>27</b> | <b>0.99</b> | <b>1.29e-11</b> | <b>0.479(74776)</b> | <b>0.497(101023)</b> | <b>-0.05</b>  | <b>0.007</b> |
| Decode – Replication                               | -         | 1.00        | 0.054           | 0.482(1979)         | 0.528(142627)        | -0.072        | 0.038        |
| <b>PGC_SCZ wave3 (incl. wave2 and replication)</b> | <b>27</b> | <b>1.00</b> | <b>2.53e-12</b> | <b>0.479(76755)</b> | <b>0.514(243650)</b> | <b>-0.051</b> | <b>0.007</b> |

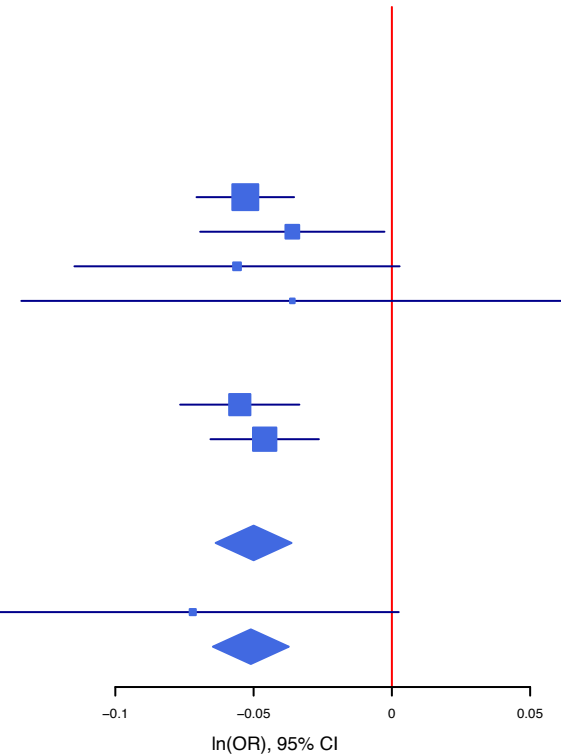

| rs6938026                                          | A/G       |             | 6:43185733      |                     | het_P:               | 0.678        | het_I:       | 0.0 |
|----------------------------------------------------|-----------|-------------|-----------------|---------------------|----------------------|--------------|--------------|-----|
|                                                    | ngt       | info        | p_value         | f_ca(n)             |                      |              |              |     |
| PGC_SCZ wave3 eur only                             | 13        | 0.99        | 8.17e-08        | 0.806(53386)        | 0.799(77258)         | 0.058        | 0.011        |     |
| PGC_SCZ wave3 asn only                             | 4         | 0.97        | 5.48e-05        | 0.619(14004)        | 0.601(16757)         | 0.071        | 0.018        |     |
| PGC_SCZ afram only                                 | -         | 0.96        | 0.0647          | -(6152)             | 0.445(3918)          | 0.056        | 0.03         |     |
| PGC_SCZ latino only                                | -         | 0.99        | 0.892           | -(1234)             | 0.786(3090)          | 0.008        | 0.061        |     |
| PGC_SCZ wave2 only                                 | 12        | 0.99        | 0.000185        | 0.797(34850)        | 0.797(44347)         | 0.051        | 0.014        |     |
| PGC_SCZ wave3 (excl. wave2)                        | 5         | 0.98        | 5.04e-09        | 0.688(39926)        | 0.698(56676)         | 0.067        | 0.012        |     |
| <b>PGC_SCZ wave3 (incl. wave2)</b>                 | <b>17</b> | <b>0.99</b> | <b>7.23e-12</b> | <b>0.73(74776)</b>  | <b>0.736(101023)</b> | <b>0.06</b>  | <b>0.009</b> |     |
| Decode – Replication                               | -         | 1.00        | 0.148           | 0.811(1979)         | 0.827(142627)        | 0.07         | 0.049        |     |
| <b>PGC_SCZ wave3 (incl. wave2 and replication)</b> | <b>17</b> | <b>0.99</b> | <b>2.54e-12</b> | <b>0.732(76755)</b> | <b>0.786(243650)</b> | <b>0.061</b> | <b>0.009</b> |     |

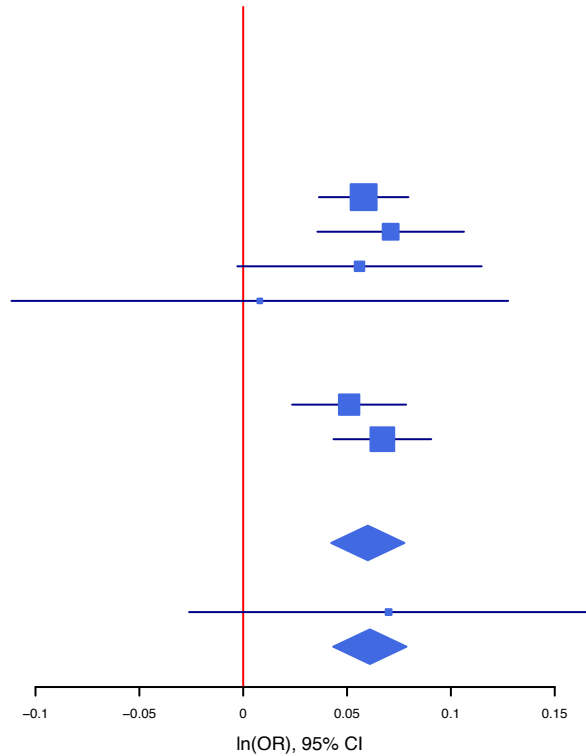

|                                                    | C/T       |             | 17:19142226     |                     | het_P:               | 0.421        | het_I:       | 0.0 |
|----------------------------------------------------|-----------|-------------|-----------------|---------------------|----------------------|--------------|--------------|-----|
|                                                    | ngt       | info        | p_value         | f_ca(n)             |                      |              |              |     |
| PGC_SCZ wave3 eur only                             | 20        | 0.95        | 1.13e-08        | 0.869(53386)        | 0.863(77258)         | 0.075        | 0.013        |     |
| PGC_SCZ wave3 asn only                             | 4         | 0.81        | 6.06e-05        | 0.201(14004)        | 0.187(16757)         | 0.1          | 0.025        |     |
| PGC_SCZ afram only                                 | -         | 0.98        | 0.246           | -(6152)             | 0.199(3918)          | 0.046        | 0.04         |     |
| PGC_SCZ latino only                                | -         | 0.98        | 0.651           | -(1234)             | 0.515(3090)          | 0.024        | 0.052        |     |
| PGC_SCZ wave2 only                                 | 17        | 0.94        | 2.07e-08        | 0.834(34850)        | 0.849(44347)         | 0.093        | 0.017        |     |
| PGC_SCZ wave3 (excl. wave2)                        | 7         | 0.93        | 1.84e-05        | 0.515(39926)        | 0.56(56676)          | 0.062        | 0.014        |     |
| <b>PGC_SCZ wave3 (incl. wave2)</b>                 | <b>24</b> | <b>0.93</b> | <b>4.05e-12</b> | <b>0.64(74776)</b>  | <b>0.671(101023)</b> | <b>0.075</b> | <b>0.011</b> |     |
| Decode – Replication                               | -         | 1.00        | 0.366           | 0.863(1979)         | 0.881(142627)        | 0.05         | 0.056        |     |
| <b>PGC_SCZ wave3 (incl. wave2 and replication)</b> | <b>24</b> | <b>0.97</b> | <b>3.15e-12</b> | <b>0.645(76755)</b> | <b>0.787(243650)</b> | <b>0.075</b> | <b>0.011</b> |     |

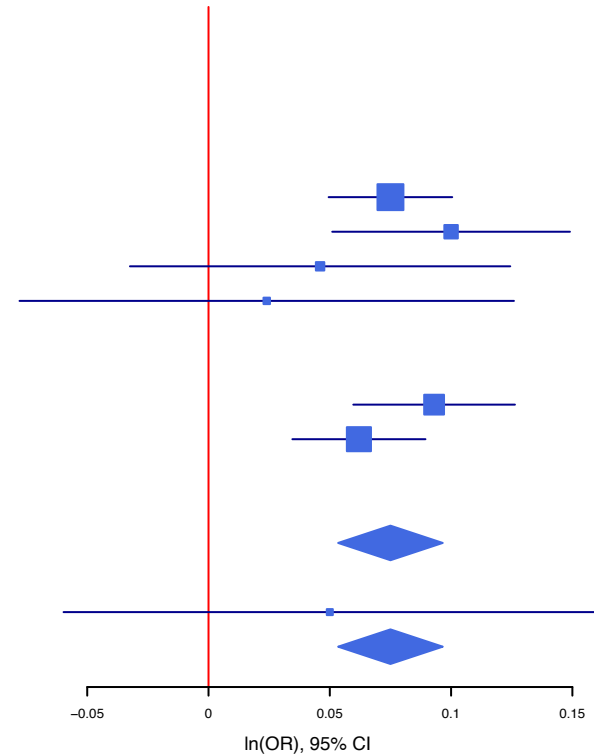

rs4937935                    A/T                    11:134580591  
 ---                    het\_P:                    0.58    het\_I:                    0.0

|                                                    | ngt      | info        | p_value         | f_ca(n)             | f_co(n)              | ln(OR)        | STDerr       |
|----------------------------------------------------|----------|-------------|-----------------|---------------------|----------------------|---------------|--------------|
| PGC_SCZ wave3 eur only                             | 0        | 0.98        | 1.85e-08        | 0.563(53386)        | 0.574(77258)         | -0.049        | 0.009        |
| PGC_SCZ wave3 asn only                             | 4        | 0.95        | 0.000118        | 0.245(14004)        | 0.25(16757)          | -0.079        | 0.02         |
| PGC_SCZ afram only                                 | -        | 0.93        | 0.0196          | -(6152)             | 0.292(3918)          | -0.078        | 0.033        |
| PGC_SCZ latino only                                | -        | 1.01        | 0.799           | -(1234)             | 0.32(3090)           | -0.014        | 0.053        |
| PGC_SCZ wave2 only                                 | 0        | 0.98        | 1.42e-05        | 0.545(34850)        | 0.566(44347)         | -0.048        | 0.011        |
| PGC_SCZ wave3 (excl. wave2)                        | 4        | 0.97        | 2.74e-08        | 0.39(39926)         | 0.422(56676)         | -0.06         | 0.011        |
| <b>PGC_SCZ wave3 (incl. wave2)</b>                 | <b>4</b> | <b>0.97</b> | <b>2.98e-12</b> | <b>0.451(74776)</b> | <b>0.477(101023)</b> | <b>-0.054</b> | <b>0.008</b> |
| Decode – Replication                               | -        | 1.00        | 0.574           | 0.564(1979)         | 0.562(142627)        | -0.022        | 0.038        |
| <b>PGC_SCZ wave3 (incl. wave2 and replication)</b> | <b>4</b> | <b>0.99</b> | <b>4.1e-12</b>  | <b>0.453(76755)</b> | <b>0.524(243650)</b> | <b>-0.053</b> | <b>0.008</b> |

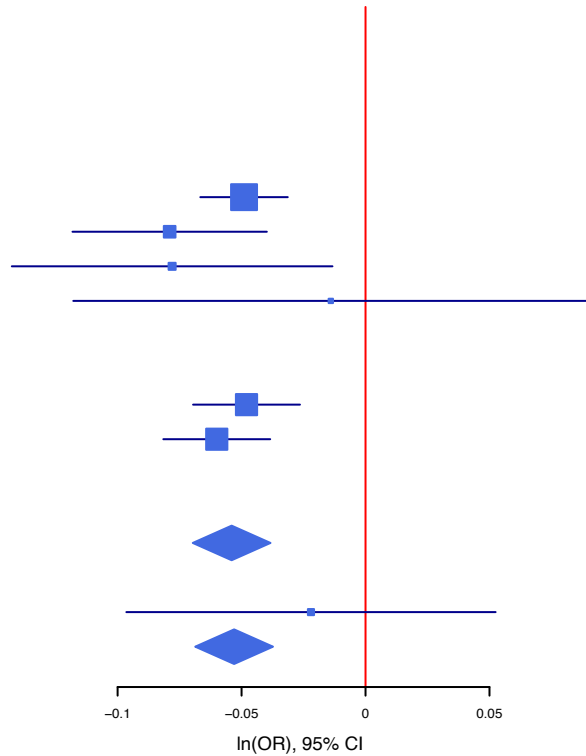

rs79210963

T/C  
---  
7:24717969  
het\_P: 0.787 het\_I: 0.0

|                                                    | ngt      | info        | p_value         | f_ca(n)             | f_co(n)              | ln(OR)        | STDerr       |
|----------------------------------------------------|----------|-------------|-----------------|---------------------|----------------------|---------------|--------------|
| PGC_SCZ wave3 eur only                             | 0        | 0.99        | 4.14e-10        | 0.884(53386)        | 0.892(77258)         | -0.086        | 0.014        |
| PGC_SCZ wave3 asn only                             | 0        | 0.96        | 0.0196          | 0.947(14004)        | 0.95(16757)          | -0.092        | 0.039        |
| PGC_SCZ afram only                                 | -        | 0.90        | 0.699           | -(6152)             | 0.97(3918)           | -0.035        | 0.091        |
| PGC_SCZ latino only                                | -        | 0.99        | 0.406           | -(1234)             | 0.834(3090)          | -0.057        | 0.068        |
| PGC_SCZ wave2 only                                 | 0        | 0.99        | 7.31e-07        | 0.887(34850)        | 0.893(44347)         | -0.086        | 0.017        |
| PGC_SCZ wave3 (excl. wave2)                        | 0        | 0.97        | 6.56e-06        | 0.905(39926)        | 0.908(56676)         | -0.082        | 0.018        |
| <b>PGC_SCZ wave3 (incl. wave2)</b>                 | <b>0</b> | <b>0.98</b> | <b>1.86e-11</b> | <b>0.898(74776)</b> | <b>0.902(101023)</b> | <b>-0.084</b> | <b>0.013</b> |
| Decode - Replication                               | -        | 1.00        | 0.0927          | 0.901(1979)         | 0.892(142627)        | -0.091        | 0.054        |
| <b>PGC_SCZ wave3 (incl. wave2 and replication)</b> | <b>0</b> | <b>0.99</b> | <b>5.31e-12</b> | <b>0.898(76755)</b> | <b>0.896(243650)</b> | <b>-0.085</b> | <b>0.012</b> |

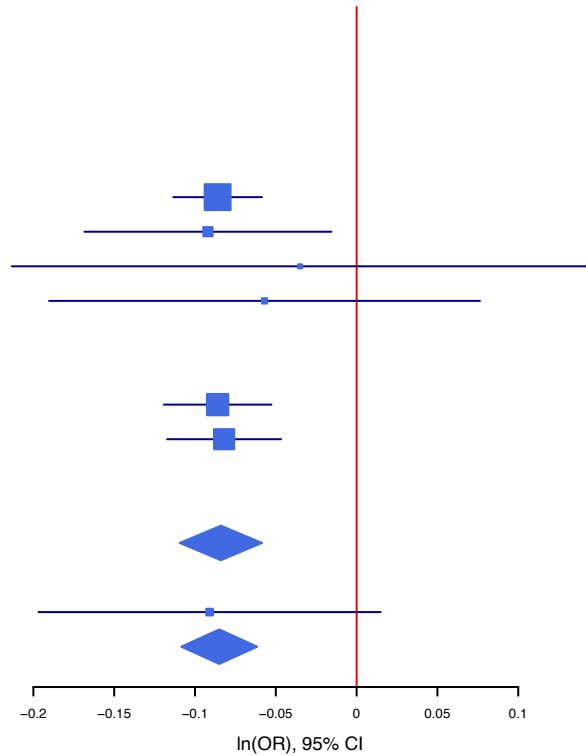

| rs77502336                                         | G/C      |             | 11:123394636    |                     | het_P:               | 0.774         | het_I:       | 0.0 |
|----------------------------------------------------|----------|-------------|-----------------|---------------------|----------------------|---------------|--------------|-----|
|                                                    | ngt      | info        | p_value         | f_ca(n)             |                      |               |              |     |
| PGC_SCZ wave3 eur only                             | 6        | 0.99        | 1.25e-08        | 0.672(53386)        | 0.686(77258)         | -0.053        | 0.009        |     |
| PGC_SCZ wave3 asn only                             | 0        | 0.93        | 0.000642        | 0.572(14004)        | 0.586(16757)         | -0.061        | 0.018        |     |
| PGC_SCZ afram only                                 | -        | 1.01        | 0.344           | -(6152)             | 0.74(3918)           | -0.038        | 0.041        |     |
| PGC_SCZ latino only                                | -        | 0.98        | 0.115           | -(1234)             | 0.689(3090)          | -0.088        | 0.056        |     |
| PGC_SCZ wave2 only                                 | 0        | 0.98        | 9.81e-09        | 0.667(34850)        | 0.687(44347)         | -0.067        | 0.012        |     |
| PGC_SCZ wave3 (excl. wave2)                        | 6        | 0.98        | 6.23e-05        | 0.666(39926)        | 0.67(56676)          | -0.044        | 0.011        |     |
| <b>PGC_SCZ wave3 (incl. wave2)</b>                 | <b>6</b> | <b>0.98</b> | <b>6.94e-12</b> | <b>0.666(74776)</b> | <b>0.677(101023)</b> | <b>-0.055</b> | <b>0.008</b> |     |
| Decode – Replication                               | -        | 1.00        | 0.435           | 0.689(1979)         | 0.7(142627)          | -0.031        | 0.04         |     |
| <b>PGC_SCZ wave3 (incl. wave2 and replication)</b> | <b>6</b> | <b>0.99</b> | <b>7.62e-12</b> | <b>0.666(76755)</b> | <b>0.689(243650)</b> | <b>-0.054</b> | <b>0.008</b> |     |

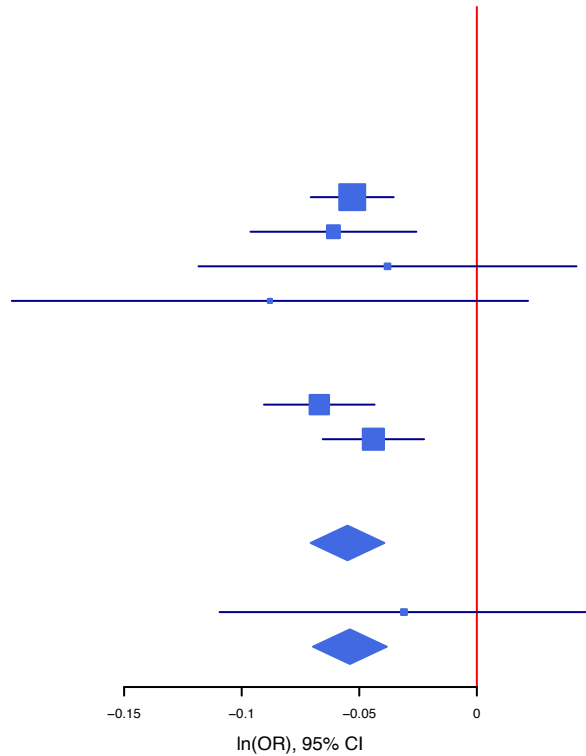

| rs17194490                                         | G/T       |             | 3:2547786       |                     | het_P:               | 0.712         | het_I:       | 0.0 |
|----------------------------------------------------|-----------|-------------|-----------------|---------------------|----------------------|---------------|--------------|-----|
|                                                    | +++       |             |                 |                     |                      |               |              |     |
|                                                    | ngt       | info        | p_value         | f_ca(n)             | f_co(n)              | ln(OR)        | STDerr       |     |
| PGC_SCZ wave3 eur only                             | 21        | 0.98        | 1.8e-11         | 0.827(53386)        | 0.839(77258)         | -0.078        | 0.012        |     |
| PGC_SCZ afram only                                 | -         | 1.00        | 0.726           | -(6152)             | 0.948(3918)          | -0.023        | 0.066        |     |
| PGC_SCZ latino only                                | -         | 1.02        | 0.397           | -(1234)             | 0.91(3090)           | -0.071        | 0.084        |     |
| PGC_SCZ wave2 only                                 | 13        | 0.98        | 3.51e-10        | 0.828(34850)        | 0.842(44347)         | -0.094        | 0.015        |     |
| PGC_SCZ wave3 (excl. wave2)                        | 8         | 0.98        | 0.00242         | 0.883(39926)        | 0.875(56676)         | -0.053        | 0.017        |     |
| <b>PGC_SCZ wave3 (incl. wave2)</b>                 | <b>21</b> | <b>0.98</b> | <b>1.53e-11</b> | <b>0.855(74776)</b> | <b>0.858(101023)</b> | <b>-0.076</b> | <b>0.011</b> |     |
| Decode – Replication                               | -         | 0.99        | 0.298           | 0.82(1979)          | 0.825(142627)        | -0.083        | 0.079        |     |
| <b>PGC_SCZ wave3 (incl. wave2 and replication)</b> | <b>21</b> | <b>0.98</b> | <b>7.92e-12</b> | <b>0.855(76755)</b> | <b>0.858(243650)</b> | <b>-0.077</b> | <b>0.011</b> |     |

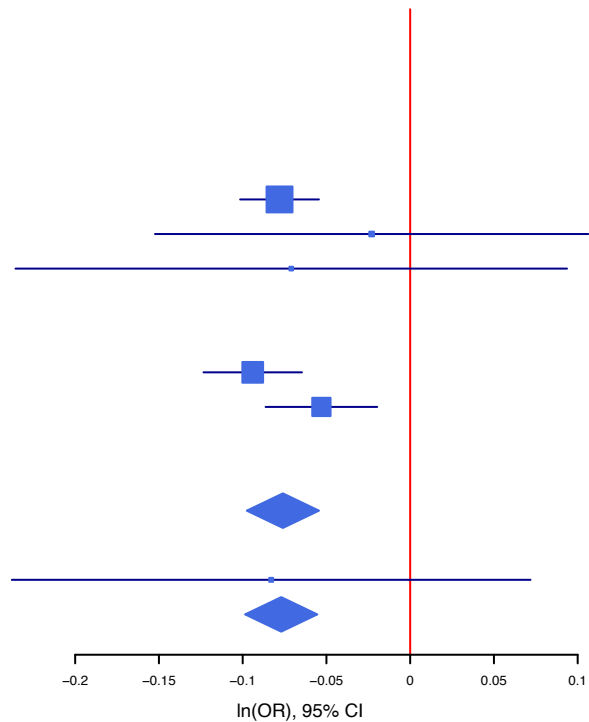

|                                                    | C/T      |             | 4:170322312     |                     |                      |              |              |
|----------------------------------------------------|----------|-------------|-----------------|---------------------|----------------------|--------------|--------------|
|                                                    | ngt      | info        | p_value         | f_ca(n)             | f_co(n)              | ln(OR)       | STDerr       |
|                                                    | ---      |             |                 | het_P:              | 0.208                | het_I:       | 36.4         |
| PGC_SCZ wave3 eur only                             | 0        | 1.00        | 7.03e-09        | 0.472(53386)        | 0.459(77258)         | 0.05         | 0.009        |
| PGC_SCZ wave3 asn only                             | 0        | 0.95        | 0.00169         | 0.274(14004)        | 0.259(16757)         | 0.063        | 0.02         |
| PGC_SCZ afram only                                 | -        | 0.99        | 0.0271          | -(6152)             | 0.567(3918)          | 0.066        | 0.03         |
| PGC_SCZ latino only                                | -        | 1.02        | 0.463           | -(1234)             | 0.33(3090)           | -0.039       | 0.053        |
| PGC_SCZ wave2 only                                 | 0        | 1.00        | 2.78e-07        | 0.461(34850)        | 0.451(44347)         | 0.056        | 0.011        |
| PGC_SCZ wave3 (excl. wave2)                        | 0        | 0.99        | 1.09e-05        | 0.419(39926)        | 0.413(56676)         | 0.046        | 0.01         |
| <b>PGC_SCZ wave3 (incl. wave2)</b>                 | <b>0</b> | <b>0.99</b> | <b>1.43e-11</b> | <b>0.435(74776)</b> | <b>0.428(101023)</b> | <b>0.051</b> | <b>0.008</b> |
| Decode – Replication                               | -        | 1.00        | 0.219           | 0.449(1979)         | 0.454(142627)        | 0.046        | 0.037        |
| <b>PGC_SCZ wave3 (incl. wave2 and replication)</b> | <b>0</b> | <b>1.00</b> | <b>9.05e-12</b> | <b>0.435(76755)</b> | <b>0.442(243650)</b> | <b>0.051</b> | <b>0.007</b> |

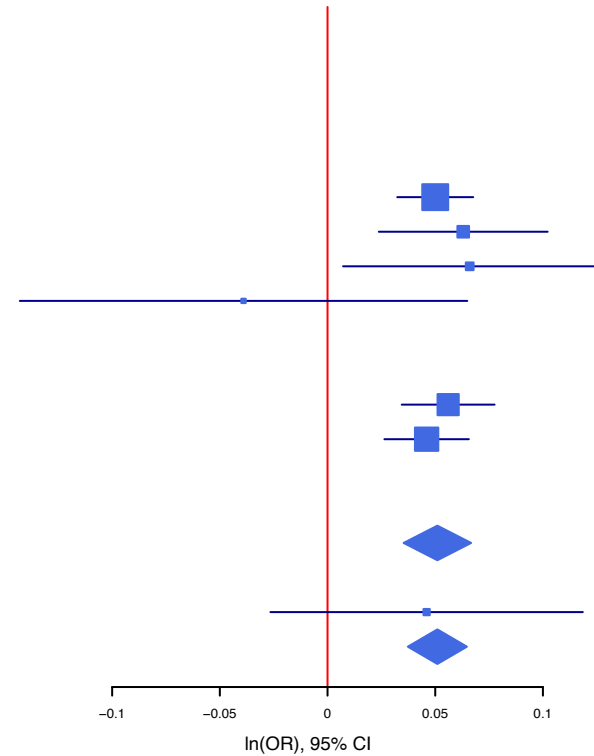



| rs9674103                                          | T/A       |             | 16:9909123      |                     | het_P:               | 0.398         | het_I:       | 0.0 |
|----------------------------------------------------|-----------|-------------|-----------------|---------------------|----------------------|---------------|--------------|-----|
|                                                    | ngt       | info        | p_value         | f_ca(n)             |                      |               |              |     |
| PGC_SCZ wave3 eur only                             | 15        | 0.99        | 7.81e-09        | 0.716(53386)        | 0.729(77258)         | -0.056        | 0.01         |     |
| PGC_SCZ wave3 asn only                             | 4         | 0.94        | 0.0566          | 0.911(14004)        | 0.917(16757)         | -0.06         | 0.032        |     |
| PGC_SCZ afram only                                 | -         | 0.96        | 0.0147          | -(6152)             | 0.623(3918)          | -0.075        | 0.031        |     |
| PGC_SCZ latino only                                | -         | 1.01        | 0.0267          | -(1234)             | 0.783(3090)          | -0.13         | 0.059        |     |
| PGC_SCZ wave2 only                                 | 15        | 1.01        | 3.06e-07        | 0.728(34850)        | 0.734(44347)         | -0.063        | 0.012        |     |
| PGC_SCZ wave3 (excl. wave2)                        | 4         | 0.97        | 8.09e-06        | 0.754(39926)        | 0.762(56676)         | -0.056        | 0.012        |     |
| <b>PGC_SCZ wave3 (incl. wave2)</b>                 | <b>19</b> | <b>0.98</b> | <b>1.13e-11</b> | <b>0.744(74776)</b> | <b>0.752(101023)</b> | <b>-0.059</b> | <b>0.009</b> |     |
| Decode – Replication                               | -         | 1.00        | 0.472           | 0.726(1979)         | 0.717(142627)        | -0.031        | 0.043        |     |
| <b>PGC_SCZ wave3 (incl. wave2 and replication)</b> | <b>19</b> | <b>0.99</b> | <b>9.59e-12</b> | <b>0.744(76755)</b> | <b>0.733(243650)</b> | <b>-0.058</b> | <b>0.008</b> |     |

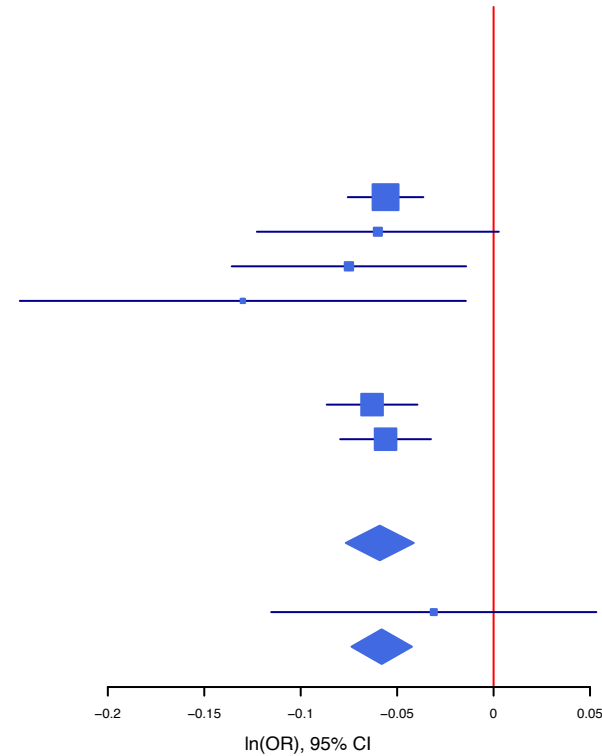

rs2929278 C/T 15:44250313  
 --- het\_P: 0.176 het\_I: 42.5

|                                                    | ngt       | info        | p_value         | f_ca(n)             | f_co(n)              | ln(OR)       | STDerr       |
|----------------------------------------------------|-----------|-------------|-----------------|---------------------|----------------------|--------------|--------------|
| PGC_SCZ wave3 eur only                             | 23        | 0.94        | 2.62e-08        | 0.749(53386)        | 0.741(77258)         | 0.057        | 0.01         |
| PGC_SCZ wave3 asn only                             | 7         | 0.96        | 4.2e-05         | 0.744(14004)        | 0.728(16757)         | 0.08         | 0.02         |
| PGC_SCZ afram only                                 | -         | 0.94        | 0.889           | -(6152)             | 0.26(3918)           | 0.005        | 0.036        |
| PGC_SCZ latino only                                | -         | 0.96        | 0.968           | -(1234)             | 0.661(3090)          | 0.002        | 0.054        |
| PGC_SCZ wave2 only                                 | 2         | 0.94        | 4.23e-05        | 0.753(34850)        | 0.748(44347)         | 0.053        | 0.013        |
| PGC_SCZ wave3 (excl. wave2)                        | 28        | 0.95        | 2.51e-07        | 0.63(39926)         | 0.649(56676)         | 0.06         | 0.012        |
| <b>PGC_SCZ wave3 (incl. wave2)</b>                 | <b>30</b> | <b>0.95</b> | <b>6.01e-11</b> | <b>0.679(74776)</b> | <b>0.687(101023)</b> | <b>0.057</b> | <b>0.009</b> |
| Decode – Replication                               | -         | 1.00        | 0.0418          | 0.738(1979)         | 0.731(142627)        | 0.091        | 0.045        |
| <b>PGC_SCZ wave3 (incl. wave2 and replication)</b> | <b>30</b> | <b>0.97</b> | <b>9.89e-12</b> | <b>0.68(76755)</b>  | <b>0.711(243650)</b> | <b>0.058</b> | <b>0.008</b> |

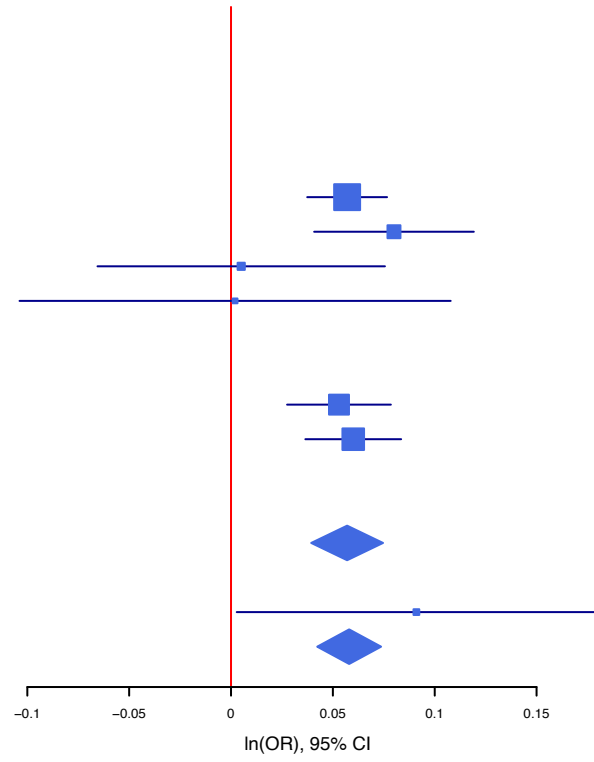

8:4180090\_T\_A

T/A

8:4180090

+??

het\_P:

1.0

het\_I:

0.0

ngt info p\_value f\_ca(n) f\_co(n) ln(OR) STDerr

PGC\_SCZ wave3 eur only 7 0.99 5.07e-10 0.798(53386) 0.806(77258) -0.067 0.011

PGC\_SCZ wave3 asn only 0 0.97 0.00721 0.675(14004) 0.683(16757) -0.05 0.018

PGC\_SCZ wave2 only 7 1.00 7.31e-08 0.79(34850) 0.8(44347) -0.072 0.014

PGC\_SCZ wave3 (excl. wave2) 0 0.98 3.32e-05 0.754(39926) 0.769(56676) -0.054 0.013

**PGC\_SCZ wave3 (incl. wave2) 7 0.99 1.45e-11 0.772(74776) 0.784(101023) -0.063 0.009**

Decode - Replication - 0.98 0.449 0.799(1979) 0.797(142627) -0.057 0.075

**PGC\_SCZ wave3 (incl. wave2 and replication) 7 0.99 1.09e-11 0.772(76755) 0.784(243650) -0.063 0.009**

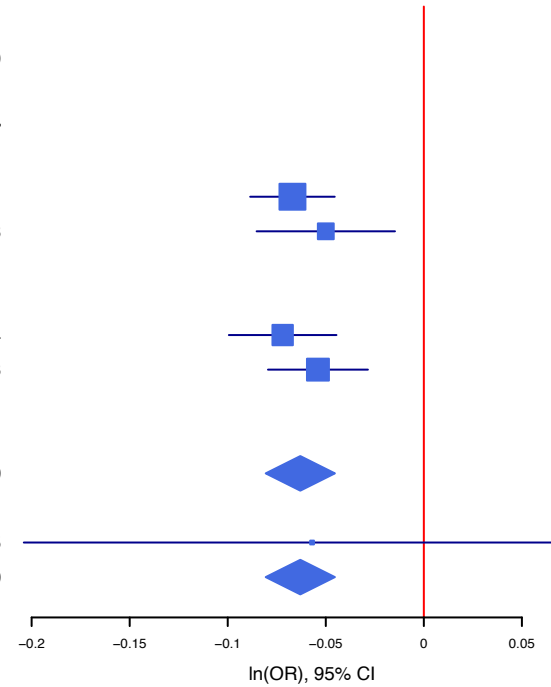

| rs7933981                                          | G/A       |             | 11:113438068    |                     | het_P:               | 0.935        | het_I:       | 0.0 |
|----------------------------------------------------|-----------|-------------|-----------------|---------------------|----------------------|--------------|--------------|-----|
|                                                    | ngt       | info        | p_value         | f_ca(n)             |                      |              |              |     |
| PGC_SCZ wave3 eur only                             | 49        | 1.00        | 1.9e-10         | 0.589(53386)        | 0.578(77258)         | 0.056        | 0.009        |     |
| PGC_SCZ wave3 asn only                             | 7         | 0.98        | 0.51            | 0.73(14004)         | 0.723(16757)         | 0.013        | 0.019        |     |
| PGC_SCZ afram only                                 | -         | 0.99        | 0.16            | -(6152)             | 0.768(3918)          | 0.049        | 0.035        |     |
| PGC_SCZ latino only                                | -         | 1.02        | 0.539           | -(1234)             | 0.547(3090)          | 0.03         | 0.049        |     |
| PGC_SCZ wave2 only                                 | 14        | 1.00        | 4.9e-07         | 0.603(34850)        | 0.59(44347)          | 0.056        | 0.011        |     |
| PGC_SCZ wave3 (excl. wave2)                        | 42        | 1.00        | 0.000121        | 0.643(39926)        | 0.629(56676)         | 0.041        | 0.011        |     |
| <b>PGC_SCZ wave3 (incl. wave2)</b>                 | <b>56</b> | <b>1.00</b> | <b>4.65e-10</b> | <b>0.628(74776)</b> | <b>0.614(101023)</b> | <b>0.048</b> | <b>0.008</b> |     |
| Decode – Replication                               | -         | 1.00        | 0.000607        | 0.583(1979)         | 0.591(142627)        | 0.131        | 0.038        |     |
| <b>PGC_SCZ wave3 (incl. wave2 and replication)</b> | <b>56</b> | <b>1.00</b> | <b>1.13e-11</b> | <b>0.627(76755)</b> | <b>0.602(243650)</b> | <b>0.051</b> | <b>0.008</b> |     |

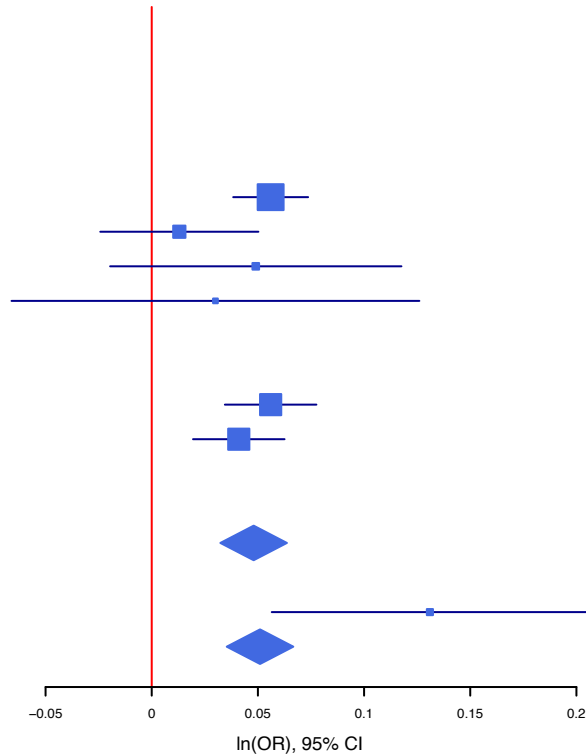

| rs4043663                                          | G/A      |             | 8:89275232      |                     | het_P:               | 0.53         | het_I:       | 0.0 |
|----------------------------------------------------|----------|-------------|-----------------|---------------------|----------------------|--------------|--------------|-----|
|                                                    | ngt      | info        | p_value         | f_ca(n)             |                      |              |              |     |
| PGC_SCZ wave3 eur only                             | 0        | 1.00        | 9.22e-09        | 0.266(53386)        | 0.251(77258)         | 0.056        | 0.01         |     |
| PGC_SCZ wave3 asn only                             | 0        | 0.99        | 0.0185          | 0.132(14004)        | 0.123(16757)         | 0.06         | 0.026        |     |
| PGC_SCZ afram only                                 | -        | 0.98        | 0.128           | -(6152)             | 0.597(3918)          | 0.046        | 0.03         |     |
| PGC_SCZ latino only                                | -        | 0.98        | 0.0338          | -(1234)             | 0.299(3090)          | 0.115        | 0.054        |     |
| PGC_SCZ wave2 only                                 | 0        | 1.01        | 4.49e-06        | 0.256(34850)        | 0.248(44347)         | 0.057        | 0.012        |     |
| PGC_SCZ wave3 (excl. wave2)                        | 0        | 0.99        | 1.59e-06        | 0.31(39926)         | 0.282(56676)         | 0.058        | 0.012        |     |
| <b>PGC_SCZ wave3 (incl. wave2)</b>                 | <b>0</b> | <b>0.99</b> | <b>3.63e-11</b> | <b>0.289(74776)</b> | <b>0.269(101023)</b> | <b>0.058</b> | <b>0.009</b> |     |
| Decode – Replication                               | -        | 1.00        | 0.129           | 0.291(1979)         | 0.26(142627)         | 0.067        | 0.044        |     |
| <b>PGC_SCZ wave3 (incl. wave2 and replication)</b> | <b>0</b> | <b>1.00</b> | <b>1.21e-11</b> | <b>0.289(76755)</b> | <b>0.264(243650)</b> | <b>0.058</b> | <b>0.008</b> |     |

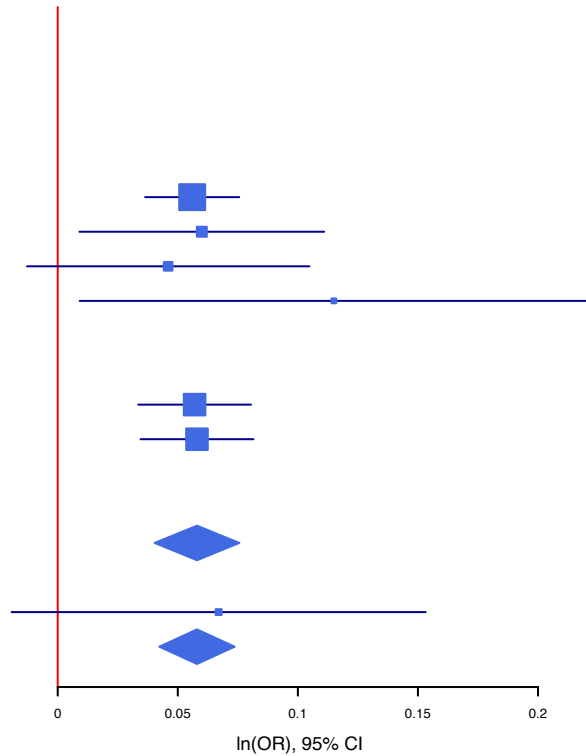

| rs187653                                           | T/C      |             | 5:137882698     |                     |                      |              |              |
|----------------------------------------------------|----------|-------------|-----------------|---------------------|----------------------|--------------|--------------|
|                                                    | ++-      | het_P:      | 0.42            | het_I:              | 0.0                  |              |              |
|                                                    | ngt      | info        | p_value         | f_ca(n)             | f_co(n)              | ln(OR)       | STDerr       |
| PGC_SCZ wave3 eur only                             | 0        | 1.00        | 7.46e-10        | 0.611(53386)        | 0.6(77258)           | 0.054        | 0.009        |
| PGC_SCZ wave3 asn only                             | 0        | 0.95        | 0.0066          | 0.23(14004)         | 0.219(16757)         | 0.058        | 0.021        |
| PGC_SCZ afram only                                 | -        | 1.00        | 0.275           | -(6152)             | 0.254(3918)          | 0.037        | 0.034        |
| PGC_SCZ latino only                                | -        | 1.01        | 0.869           | -(1234)             | 0.608(3090)          | -0.008       | 0.051        |
| PGC_SCZ wave2 only                                 | 0        | 1.00        | 1.15e-06        | 0.593(34850)        | 0.594(44347)         | 0.054        | 0.011        |
| PGC_SCZ wave3 (excl. wave2)                        | 0        | 0.99        | 4.25e-06        | 0.452(39926)        | 0.463(56676)         | 0.05         | 0.011        |
| <b>PGC_SCZ wave3 (incl. wave2)</b>                 | <b>0</b> | <b>0.99</b> | <b>1.73e-11</b> | <b>0.508(74776)</b> | <b>0.513(101023)</b> | <b>0.052</b> | <b>0.008</b> |
| Decode – Replication                               | -        | 0.99        | 0.334           | 0.57(1979)          | 0.558(142627)        | 0.037        | 0.039        |
| <b>PGC_SCZ wave3 (incl. wave2 and replication)</b> | <b>0</b> | <b>0.99</b> | <b>1.23e-11</b> | <b>0.509(76755)</b> | <b>0.538(243650)</b> | <b>0.052</b> | <b>0.008</b> |

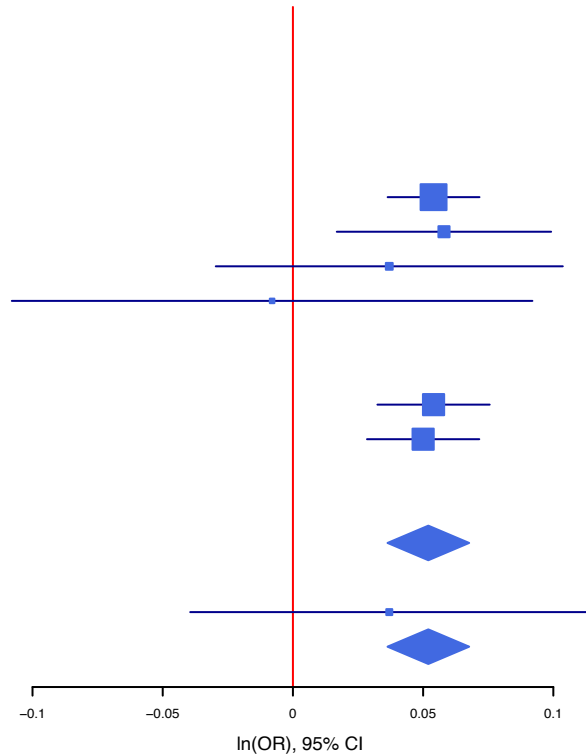

| rs1399551                                          | T/A      |             | 3:80548877      |                     | het_P:               | 0.492         | het_I:       | 0.0 |
|----------------------------------------------------|----------|-------------|-----------------|---------------------|----------------------|---------------|--------------|-----|
|                                                    | ngt      | info        | p_value         | f_ca(n)             |                      |               |              |     |
| PGC_SCZ wave3 eur only                             | 5        | 1.00        | 3.19e-07        | 0.316(53386)        | 0.324(77258)         | -0.047        | 0.009        |     |
| PGC_SCZ wave3 asn only                             | 0        | 0.98        | 0.000112        | 0.144(14004)        | 0.15(16757)          | -0.093        | 0.024        |     |
| PGC_SCZ afram only                                 | -        | 0.94        | 0.117           | -(6152)             | 0.294(3918)          | -0.052        | 0.033        |     |
| PGC_SCZ latino only                                | -        | 0.98        | 0.0338          | -(1234)             | 0.268(3090)          | -0.122        | 0.057        |     |
| PGC_SCZ wave2 only                                 | 0        | 1.00        | 1.88e-05        | 0.309(34850)        | 0.322(44347)         | -0.05         | 0.012        |     |
| PGC_SCZ wave3 (excl. wave2)                        | 5        | 0.98        | 4.73e-07        | 0.262(39926)        | 0.271(56676)         | -0.059        | 0.012        |     |
| <b>PGC_SCZ wave3 (incl. wave2)</b>                 | <b>5</b> | <b>0.99</b> | <b>4.51e-11</b> | <b>0.28(74776)</b>  | <b>0.291(101023)</b> | <b>-0.054</b> | <b>0.008</b> |     |
| Decode – Replication                               | -        | 1.00        | 0.196           | 0.324(1979)         | 0.278(142627)        | -0.051        | 0.04         |     |
| <b>PGC_SCZ wave3 (incl. wave2 and replication)</b> | <b>5</b> | <b>1.00</b> | <b>1.52e-11</b> | <b>0.281(76755)</b> | <b>0.284(243650)</b> | <b>-0.054</b> | <b>0.008</b> |     |

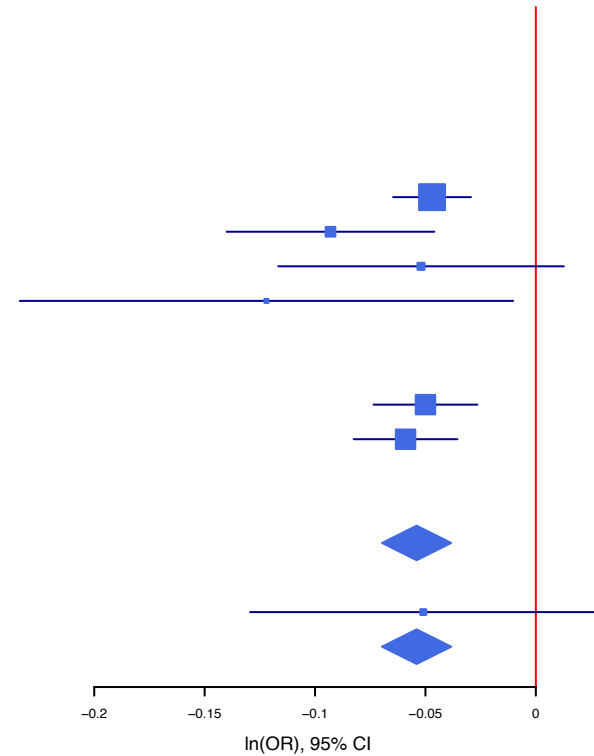

rs56282503

T/C  
---  
15:40566759  
het\_P: 0.939 het\_I: 0.0

|                                                    | ngt      | info        | p_value         | f_ca(n)             | f_co(n)              | ln(OR)        | STDerr       |
|----------------------------------------------------|----------|-------------|-----------------|---------------------|----------------------|---------------|--------------|
| PGC_SCZ wave3 eur only                             | 6        | 0.94        | 7.66e-10        | 0.694(53386)        | 0.706(77258)         | -0.06         | 0.01         |
| PGC_SCZ wave3 asn only                             | 1        | 0.79        | 0.528           | 0.877(14004)        | 0.874(16757)         | -0.019        | 0.029        |
| PGC_SCZ afram only                                 | -        | 0.91        | 0.504           | -(6152)             | 0.935(3918)          | -0.043        | 0.064        |
| PGC_SCZ latino only                                | -        | 0.95        | 0.257           | -(1234)             | 0.819(3090)          | -0.075        | 0.066        |
| PGC_SCZ wave2 only                                 | 0        | 0.93        | 6.01e-09        | 0.704(34850)        | 0.712(44347)         | -0.072        | 0.012        |
| PGC_SCZ wave3 (excl. wave2)                        | 7        | 0.91        | 0.0046          | 0.808(39926)        | 0.794(56676)         | -0.037        | 0.013        |
| <b>PGC_SCZ wave3 (incl. wave2)</b>                 | <b>7</b> | <b>0.92</b> | <b>6.63e-10</b> | <b>0.767(74776)</b> | <b>0.762(101023)</b> | <b>-0.056</b> | <b>0.009</b> |
| Decode - Replication                               | -        | 1.00        | 0.00117         | 0.698(1979)         | 0.696(142627)        | -0.134        | 0.041        |
| <b>PGC_SCZ wave3 (incl. wave2 and replication)</b> | <b>7</b> | <b>0.96</b> | <b>1.6e-11</b>  | <b>0.765(76755)</b> | <b>0.725(243650)</b> | <b>-0.059</b> | <b>0.009</b> |

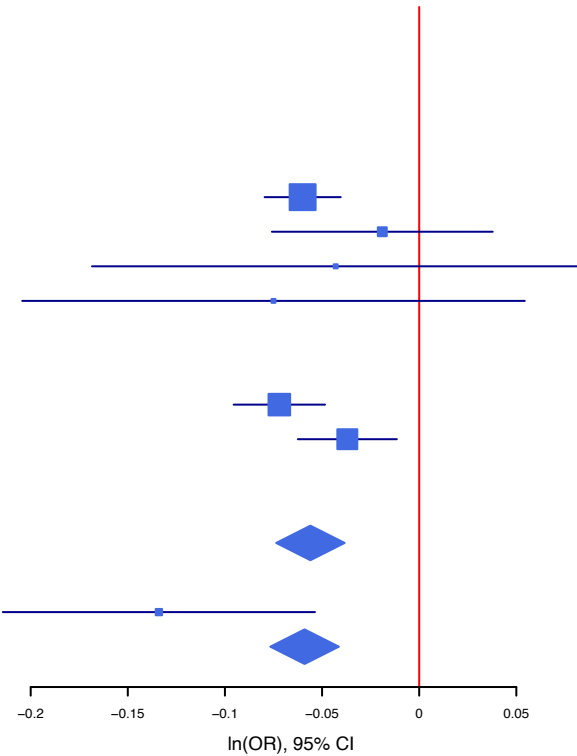



| rs2278515                                          | T/C       |             | 2:201282338     |                     | het_P:               | 0.186        | het_I:       | 40.5 |
|----------------------------------------------------|-----------|-------------|-----------------|---------------------|----------------------|--------------|--------------|------|
|                                                    | ngt       | info        | p_value         | f_ca(n)             |                      |              |              |      |
| PGC_SCZ wave3 eur only                             | 14        | 0.99        | 1.96e-06        | 0.59(53386)         | 0.578(77258)         | 0.042        | 0.009        |      |
| PGC_SCZ wave3 asn only                             | 1         | 0.99        | 3.84e-06        | 0.736(14004)        | 0.721(16757)         | 0.089        | 0.019        |      |
| PGC_SCZ afram only                                 | -         | 1.03        | 0.964           | -(6152)             | 0.852(3918)          | -0.002       | 0.041        |      |
| PGC_SCZ latino only                                | -         | 1.02        | 0.0196          | -(1234)             | 0.523(3090)          | 0.116        | 0.05         |      |
| PGC_SCZ wave2 only                                 | 13        | 1.00        | 5.88e-05        | 0.594(34850)        | 0.578(44347)         | 0.044        | 0.011        |      |
| PGC_SCZ wave3 (excl. wave2)                        | 2         | 1.00        | 4.73e-07        | 0.664(39926)        | 0.645(56676)         | 0.054        | 0.011        |      |
| <b>PGC_SCZ wave3 (incl. wave2)</b>                 | <b>15</b> | <b>1.00</b> | <b>1.78e-10</b> | <b>0.637(74776)</b> | <b>0.62(101023)</b>  | <b>0.05</b>  | <b>0.008</b> |      |
| Decode – Replication                               | -         | 1.00        | 0.0114          | 0.592(1979)         | 0.588(142627)        | 0.098        | 0.039        |      |
| <b>PGC_SCZ wave3 (incl. wave2 and replication)</b> | <b>15</b> | <b>1.00</b> | <b>1.8e-11</b>  | <b>0.636(76755)</b> | <b>0.603(243650)</b> | <b>0.051</b> | <b>0.008</b> |      |

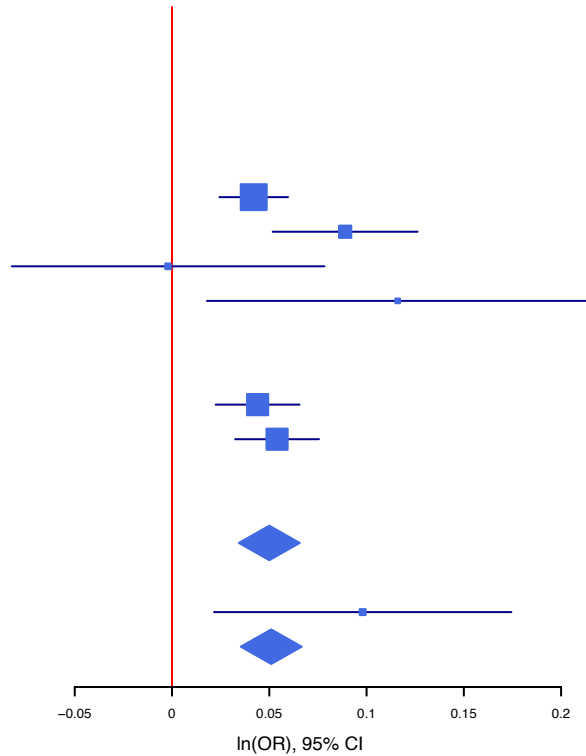

| rs298216                                           | C/G      |             | 8:65293195      |                     | het_P:               | 0.305         | het_I:       | 15.7 |
|----------------------------------------------------|----------|-------------|-----------------|---------------------|----------------------|---------------|--------------|------|
|                                                    | ngt      | info        | p_value         | f_ca(n)             |                      |               |              |      |
| PGC_SCZ wave3 eur only                             | 0        | 0.99        | 0.000144        | 0.098(53386)        | 0.1(77258)           | -0.056        | 0.015        |      |
| PGC_SCZ wave3 asn only                             | 0        | 0.95        | 5.35e-07        | 0.173(14004)        | 0.191(16757)         | -0.114        | 0.023        |      |
| PGC_SCZ afram only                                 | -        | 0.94        | 0.0282          | -(6152)             | 0.147(3918)          | -0.093        | 0.042        |      |
| PGC_SCZ latino only                                | -        | 1.01        | 0.0225          | -(1234)             | 0.081(3090)          | -0.212        | 0.093        |      |
| PGC_SCZ wave2 only                                 | 0        | 0.99        | 0.000929        | 0.097(34850)        | 0.099(44347)         | -0.061        | 0.018        |      |
| PGC_SCZ wave3 (excl. wave2)                        | 0        | 0.97        | 1.07e-08        | 0.124(39926)        | 0.126(56676)         | -0.086        | 0.015        |      |
| <b>PGC_SCZ wave3 (incl. wave2)</b>                 | <b>0</b> | <b>0.98</b> | <b>6.79e-11</b> | <b>0.113(74776)</b> | <b>0.116(101023)</b> | <b>-0.076</b> | <b>0.012</b> |      |
| Decode – Replication                               | -        | 1.00        | 0.123           | 0.115(1979)         | 0.099(142627)        | -0.1          | 0.065        |      |
| <b>PGC_SCZ wave3 (incl. wave2 and replication)</b> | <b>0</b> | <b>0.99</b> | <b>2.09e-11</b> | <b>0.113(76755)</b> | <b>0.106(243650)</b> | <b>-0.077</b> | <b>0.012</b> |      |

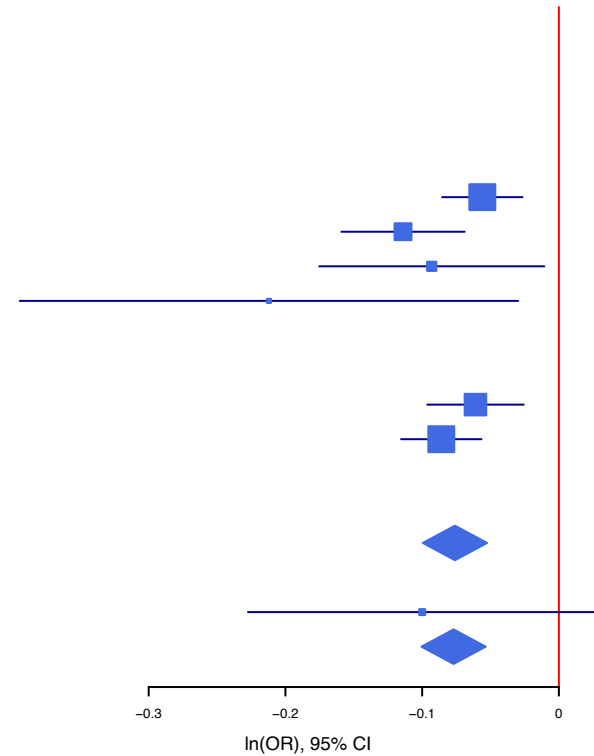

| rs4678552                                          | G/A      |             | 3:36844522      |                     |                      |               |              |
|----------------------------------------------------|----------|-------------|-----------------|---------------------|----------------------|---------------|--------------|
|                                                    | +++      | het_P:      | 0.397           | het_I:              | 0.0                  |               |              |
|                                                    | ngt      | info        | p_value         | f_ca(n)             | f_co(n)              | ln(OR)        | STDerr       |
| PGC_SCZ wave3 eur only                             | 0        | 0.95        | 1.52e-11        | 0.645(53386)        | 0.657(77258)         | -0.062        | 0.009        |
| PGC_SCZ wave3 asn only                             | 0        | 0.87        | 0.331           | 0.944(14004)        | 0.946(16757)         | 0.041         | 0.042        |
| PGC_SCZ afram only                                 | -        | 1.01        | 0.571           | -(6152)             | 0.721(3918)          | -0.018        | 0.032        |
| PGC_SCZ latino only                                | -        | 1.03        | 0.727           | -(1234)             | 0.68(3090)           | -0.018        | 0.052        |
| PGC_SCZ wave2 only                                 | 0        | 0.96        | 2.15e-10        | 0.659(34850)        | 0.664(44347)         | -0.074        | 0.012        |
| PGC_SCZ wave3 (excl. wave2)                        | 0        | 0.95        | 0.0166          | 0.735(39926)        | 0.734(56676)         | -0.03         | 0.012        |
| <b>PGC_SCZ wave3 (incl. wave2)</b>                 | <b>0</b> | <b>0.95</b> | <b>3.19e-10</b> | <b>0.705(74776)</b> | <b>0.707(101023)</b> | <b>-0.054</b> | <b>0.009</b> |
| Decode – Replication                               | -        | 1.00        | 0.00585         | 0.668(1979)         | 0.651(142627)        | -0.11         | 0.04         |
| <b>PGC_SCZ wave3 (incl. wave2 and replication)</b> | <b>0</b> | <b>0.98</b> | <b>2.13e-11</b> | <b>0.704(76755)</b> | <b>0.676(243650)</b> | <b>-0.056</b> | <b>0.008</b> |

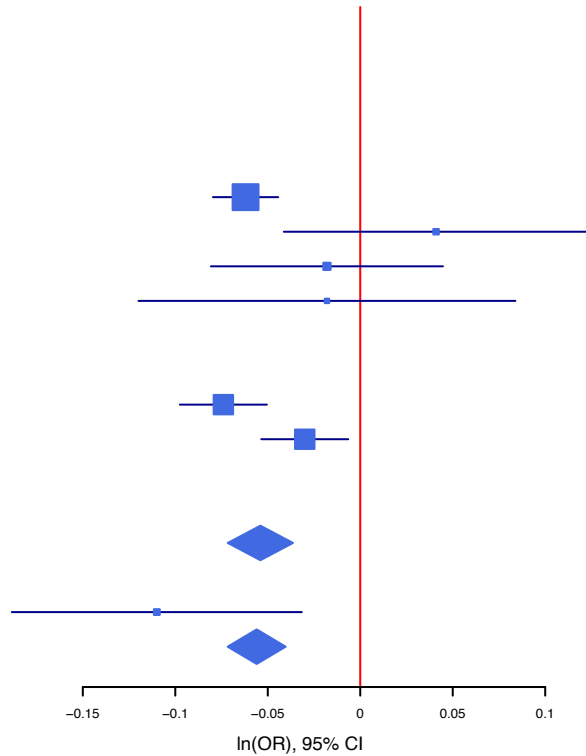

rs7830315                      T/C                      8:65608361  
 ---                                      het\_P:                      0.804    het\_I:                      0.0

|                                                    | ngt       | info        | p_value         | f_ca(n)             | f_co(n)              | ln(OR)        | STDerr       |
|----------------------------------------------------|-----------|-------------|-----------------|---------------------|----------------------|---------------|--------------|
| PGC_SCZ wave3 eur only                             | 49        | 0.99        | 3.08e-08        | 0.478(53386)        | 0.489(77258)         | -0.048        | 0.009        |
| PGC_SCZ wave3 asn only                             | 8         | 0.99        | 0.00387         | 0.539(14004)        | 0.553(16757)         | -0.049        | 0.017        |
| PGC_SCZ afram only                                 | -         | 0.98        | 0.0337          | -(6152)             | 0.714(3918)          | -0.07         | 0.033        |
| PGC_SCZ latino only                                | -         | 1.00        | 0.405           | -(1234)             | 0.509(3090)          | -0.041        | 0.05         |
| PGC_SCZ wave2 only                                 | 13        | 0.99        | 0.00156         | 0.478(34850)        | 0.482(44347)         | -0.034        | 0.011        |
| PGC_SCZ wave3 (excl. wave2)                        | 44        | 0.99        | 1.1e-09         | 0.547(39926)        | 0.545(56676)         | -0.062        | 0.01         |
| <b>PGC_SCZ wave3 (incl. wave2)</b>                 | <b>57</b> | <b>0.99</b> | <b>3.34e-11</b> | <b>0.52(74776)</b>  | <b>0.521(101023)</b> | <b>-0.049</b> | <b>0.007</b> |
| Decode – Replication                               | -         | 1.00        | 0.387           | 0.473(1979)         | 0.492(142627)        | -0.033        | 0.038        |
| <b>PGC_SCZ wave3 (incl. wave2 and replication)</b> | <b>57</b> | <b>1.00</b> | <b>2.44e-11</b> | <b>0.519(76755)</b> | <b>0.505(243650)</b> | <b>-0.048</b> | <b>0.007</b> |

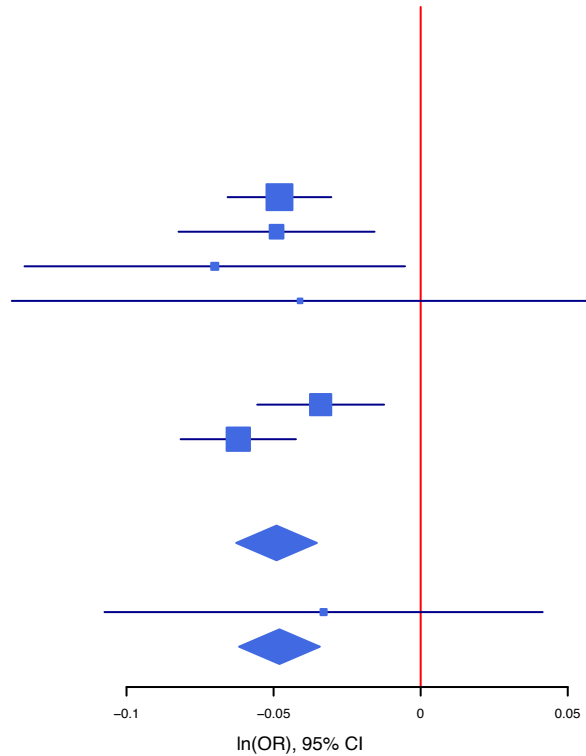

rs11619756

G/A

13:44329004

---

het\_P:

0.029

het\_I:

71.9

ngt info p\_value f\_ca(n) f\_co(n) ln(OR) STDerr

PGC\_SCZ wave3 eur only 27 0.99 8.91e-07 0.454(53386) 0.438(77258) 0.043 0.009

PGC\_SCZ wave3 asn only 6 0.96 0.00092 0.825(14004) 0.817(16757) 0.076 0.023

PGC\_SCZ afram only - 0.99 0.000226 -(6152) 0.887(3918) 0.176 0.048

PGC\_SCZ latino only - 1.00 0.338 -(1234) 0.69(3090) 0.052 0.054

PGC\_SCZ wave2 only 26 1.00 0.00018 0.472(34850) 0.447(44347) 0.041 0.011

PGC\_SCZ wave3 (excl. wave2) 7 0.98 1.12e-07 0.671(39926) 0.628(56676) 0.061 0.011

**PGC\_SCZ wave3 (incl. wave2) 33 0.99 2.04e-10 0.593(74776) 0.558(101023) 0.051 0.008**

Decode - Replication - 1.00 0.025 0.472(1979) 0.462(142627) 0.085 0.038

**PGC\_SCZ wave3 (incl. wave2 and replication) 33 0.99 2.46e-11 0.59(76755) 0.505(243650) 0.052 0.008**

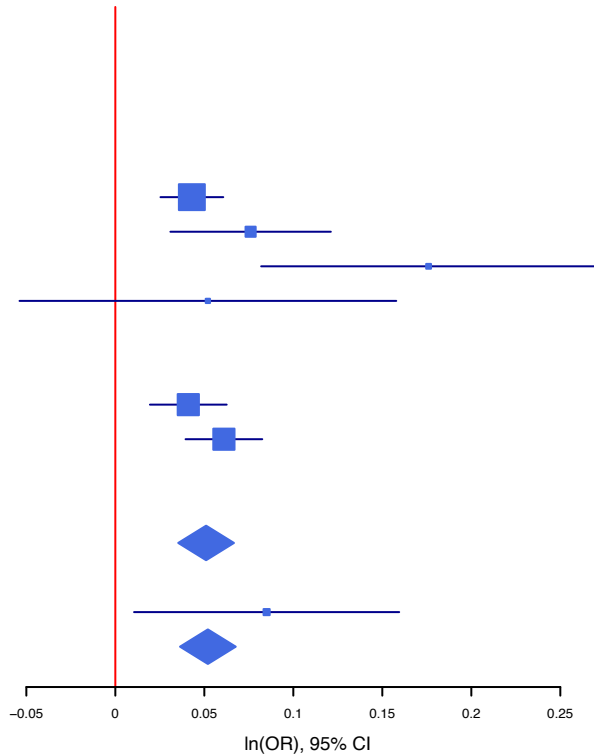

rs1593304                    A/G                    7:131619847  
 ---                    het\_P:                    0.933    het\_I:                    0.0

|                                                    | ngt       | info        | p_value         | f_ca(n)             | f_co(n)              | ln(OR)        | STDerr      |
|----------------------------------------------------|-----------|-------------|-----------------|---------------------|----------------------|---------------|-------------|
| PGC_SCZ wave3 eur only                             | 57        | 0.96        | 7.45e-09        | 0.193(53386)        | 0.199(77258)         | -0.064        | 0.011       |
| PGC_SCZ wave3 asn only                             | 9         | 0.88        | 0.00954         | 0.146(14004)        | 0.152(16757)         | -0.065        | 0.025       |
| PGC_SCZ afram only                                 | -         | 1.03        | 0.206           | -(6152)             | 0.806(3918)          | -0.049        | 0.039       |
| PGC_SCZ latino only                                | -         | 1.02        | 0.322           | -(1234)             | 0.195(3090)          | -0.062        | 0.062       |
| PGC_SCZ wave2 only                                 | 29        | 0.95        | 9.2e-07         | 0.186(34850)        | 0.194(44347)         | -0.07         | 0.014       |
| PGC_SCZ wave3 (excl. wave2)                        | 37        | 0.97        | 1.4e-05         | 0.307(39926)        | 0.282(56676)         | -0.058        | 0.013       |
| <b>PGC_SCZ wave3 (incl. wave2)</b>                 | <b>66</b> | <b>0.96</b> | <b>5.91e-11</b> | <b>0.259(74776)</b> | <b>0.248(101023)</b> | <b>-0.063</b> | <b>0.01</b> |
| Decode – Replication                               | -         | 1.00        | 0.164           | 0.186(1979)         | 0.183(142627)        | -0.067        | 0.048       |
| <b>PGC_SCZ wave3 (incl. wave2 and replication)</b> | <b>66</b> | <b>0.98</b> | <b>2.7e-11</b>  | <b>0.257(76755)</b> | <b>0.212(243650)</b> | <b>-0.063</b> | <b>0.01</b> |

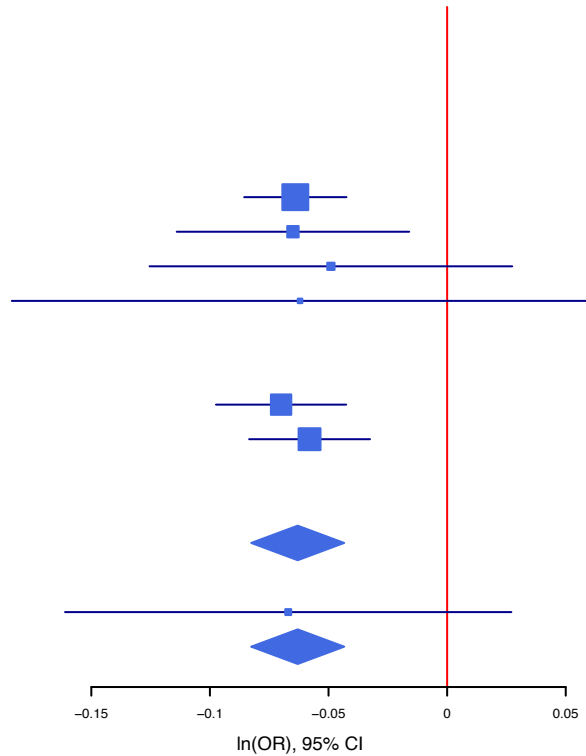

| rs2696466                                          | A/G      |             | 17:44289832     |                     | het_P:               | 0.292        | het_I:       | 18.7 |
|----------------------------------------------------|----------|-------------|-----------------|---------------------|----------------------|--------------|--------------|------|
|                                                    | ++       | +-          | het_P:          | het_I:              |                      |              |              |      |
|                                                    | ngt      | info        | p_value         | f_ca(n)             | f_co(n)              | ln(OR)       | STDerr       |      |
| PGC_SCZ wave3 eur only                             | 0        | 0.92        | 2.64e-11        | 0.61(53386)         | 0.597(77258)         | 0.061        | 0.009        |      |
| PGC_SCZ wave3 asn only                             | 0        | 0.74        | 0.541           | 0.549(14004)        | 0.553(16757)         | 0.012        | 0.02         |      |
| PGC_SCZ afram only                                 | -        | 0.53        | 0.0531          | -(6152)             | 0.61(3918)           | 0.079        | 0.041        |      |
| PGC_SCZ latino only                                | -        | 0.45        | 0.475           | -(1234)             | 0.544(3090)          | -0.053       | 0.074        |      |
| PGC_SCZ wave2 only                                 | 0        | 0.90        | 2.24e-06        | 0.608(34850)        | 0.602(44347)         | 0.055        | 0.012        |      |
| PGC_SCZ wave3 (excl. wave2)                        | 0        | 0.76        | 1.14e-05        | 0.583(39926)        | 0.577(56676)         | 0.049        | 0.011        |      |
| <b>PGC_SCZ wave3 (incl. wave2)</b>                 | <b>0</b> | <b>0.81</b> | <b>1.01e-10</b> | <b>0.593(74776)</b> | <b>0.587(101023)</b> | <b>0.052</b> | <b>0.008</b> |      |
| Decode – Replication                               | -        | 1.00        | 0.095           | 0.602(1979)         | 0.56(142627)         | 0.065        | 0.039        |      |
| <b>PGC_SCZ wave3 (incl. wave2 and replication)</b> | <b>0</b> | <b>0.92</b> | <b>2.72e-11</b> | <b>0.593(76755)</b> | <b>0.572(243650)</b> | <b>0.053</b> | <b>0.008</b> |      |

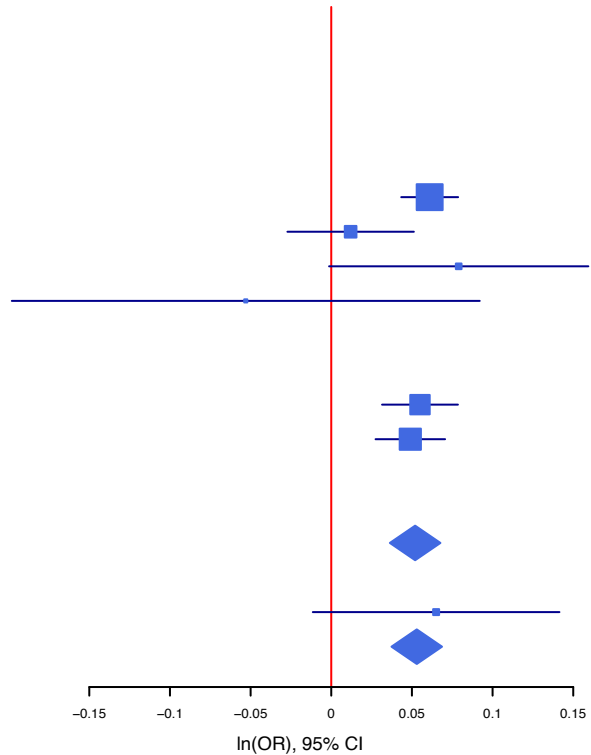

|                                                    | G/A      |             | 3:161777035     |                     | het_P:               | 0.638        | het_I:       | 0.0 |
|----------------------------------------------------|----------|-------------|-----------------|---------------------|----------------------|--------------|--------------|-----|
|                                                    | ngt      | info        | p_value         | f_ca(n)             |                      |              |              |     |
| PGC_SCZ wave3 eur only                             | 0        | 1.00        | 3.9e-06         | 0.641(53386)        | 0.633(77258)         | 0.041        | 0.009        |     |
| PGC_SCZ wave3 asn only                             | 0        | 0.99        | 3.1e-07         | 0.489(14004)        | 0.465(16757)         | 0.087        | 0.017        |     |
| PGC_SCZ afram only                                 | -        | 1.00        | 0.0304          | -(6152)             | 0.811(3918)          | 0.081        | 0.037        |     |
| PGC_SCZ latino only                                | -        | 1.02        | 0.706           | -(1234)             | 0.74(3090)           | 0.021        | 0.056        |     |
| PGC_SCZ wave2 only                                 | 0        | 0.99        | 1.18e-05        | 0.638(34850)        | 0.634(44347)         | 0.05         | 0.011        |     |
| PGC_SCZ wave3 (excl. wave2)                        | 0        | 1.00        | 2.42e-07        | 0.656(39926)        | 0.636(56676)         | 0.054        | 0.01         |     |
| <b>PGC_SCZ wave3 (incl. wave2)</b>                 | <b>0</b> | <b>1.00</b> | <b>1.04e-11</b> | <b>0.649(74776)</b> | <b>0.635(101023)</b> | <b>0.052</b> | <b>0.008</b> |     |
| Decode – Replication                               | -        | 1.00        | 0.979           | 0.641(1979)         | 0.619(142627)        | -0.001       | 0.04         |     |
| <b>PGC_SCZ wave3 (incl. wave2 and replication)</b> | <b>0</b> | <b>1.00</b> | <b>3.21e-11</b> | <b>0.649(76755)</b> | <b>0.626(243650)</b> | <b>0.05</b>  | <b>0.008</b> |     |

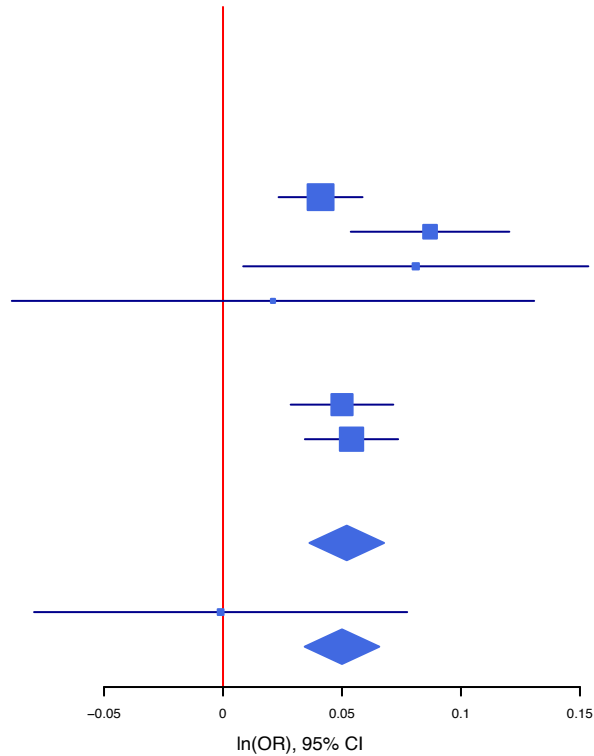



**rs12363019**                      **T/A**                      **11:24374545**  
 +++                                      het\_P:                      0.638    het\_I:                      0.0

|                                                    | ngt      | info        | p_value         | f_ca(n)             | f_co(n)              | ln(OR)        | STDerr       |
|----------------------------------------------------|----------|-------------|-----------------|---------------------|----------------------|---------------|--------------|
| PGC_SCZ wave3 eur only                             | 0        | 0.99        | 4.95e-09        | 0.481(53386)        | 0.492(77258)         | -0.051        | 0.009        |
| PGC_SCZ wave3 asn only                             | 0        | 0.97        | 0.0152          | 0.853(14004)        | 0.86(16757)          | -0.06         | 0.025        |
| PGC_SCZ afram only                                 | -        | 0.98        | 0.0578          | -(6152)             | 0.901(3918)          | -0.099        | 0.052        |
| PGC_SCZ latino only                                | -        | 1.02        | 0.457           | -(1234)             | 0.615(3090)          | -0.037        | 0.05         |
| PGC_SCZ wave2 only                                 | 0        | 0.99        | 6.1e-09         | 0.498(34850)        | 0.499(44347)         | -0.064        | 0.011        |
| PGC_SCZ wave3 (excl. wave2)                        | 0        | 0.99        | 0.000613        | 0.677(39926)        | 0.654(56676)         | -0.04         | 0.012        |
| <b>PGC_SCZ wave3 (incl. wave2)</b>                 | <b>0</b> | <b>0.99</b> | <b>5.91e-11</b> | <b>0.606(74776)</b> | <b>0.595(101023)</b> | <b>-0.052</b> | <b>0.008</b> |
| Decode – Replication                               | -        | 1.00        | 0.304           | 0.492(1979)         | 0.455(142627)        | -0.039        | 0.038        |
| <b>PGC_SCZ wave3 (incl. wave2 and replication)</b> | <b>0</b> | <b>1.00</b> | <b>3.57e-11</b> | <b>0.604(76755)</b> | <b>0.518(243650)</b> | <b>-0.052</b> | <b>0.008</b> |

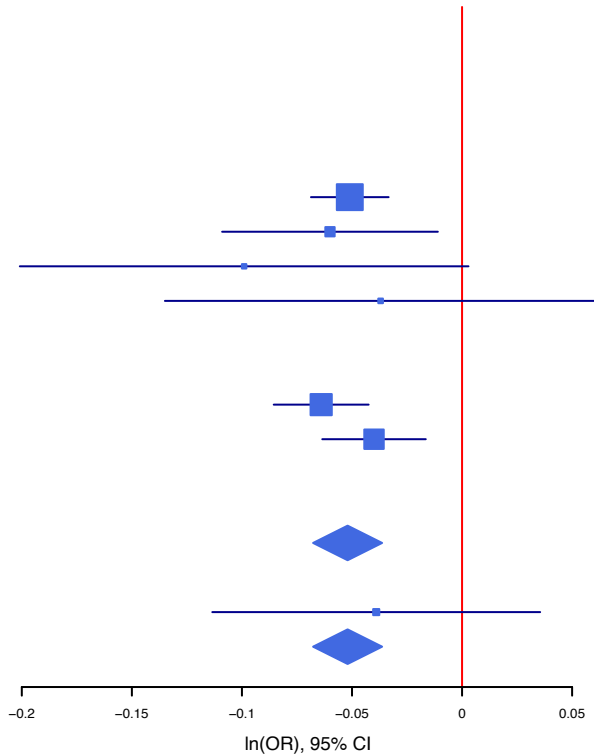

| rs302317                                           | G/A      |             | 12:29921443     |                     | het_P:               | 0.207        | het_I:       | 36.5 |
|----------------------------------------------------|----------|-------------|-----------------|---------------------|----------------------|--------------|--------------|------|
|                                                    | ngt      | info        | p_value         | f_ca(n)             |                      |              |              |      |
| PGC_SCZ wave3 eur only                             | 0        | 1.00        | 9.98e-08        | 0.661(53386)        | 0.646(77258)         | 0.048        | 0.009        |      |
| PGC_SCZ wave3 asn only                             | 1        | 0.98        | 6.43e-05        | 0.748(14004)        | 0.732(16757)         | 0.078        | 0.02         |      |
| PGC_SCZ afram only                                 | -        | 1.01        | 0.192           | -(6152)             | 0.927(3918)          | 0.074        | 0.057        |      |
| PGC_SCZ latino only                                | -        | 1.01        | 0.358           | -(1234)             | 0.831(3090)          | -0.06        | 0.065        |      |
| PGC_SCZ wave2 only                                 | 0        | 1.00        | 3.28e-08        | 0.667(34850)        | 0.649(44347)         | 0.063        | 0.011        |      |
| PGC_SCZ wave3 (excl. wave2)                        | 1        | 0.99        | 0.000293        | 0.767(39926)        | 0.735(56676)         | 0.041        | 0.011        |      |
| <b>PGC_SCZ wave3 (incl. wave2)</b>                 | <b>1</b> | <b>1.00</b> | <b>7.87e-11</b> | <b>0.727(74776)</b> | <b>0.702(101023)</b> | <b>0.052</b> | <b>0.008</b> |      |
| Decode – Replication                               | -        | 1.00        | 0.165           | 0.664(1979)         | 0.647(142627)        | 0.054        | 0.039        |      |
| <b>PGC_SCZ wave3 (incl. wave2 and replication)</b> | <b>1</b> | <b>1.00</b> | <b>3.68e-11</b> | <b>0.726(76755)</b> | <b>0.672(243650)</b> | <b>0.052</b> | <b>0.008</b> |      |

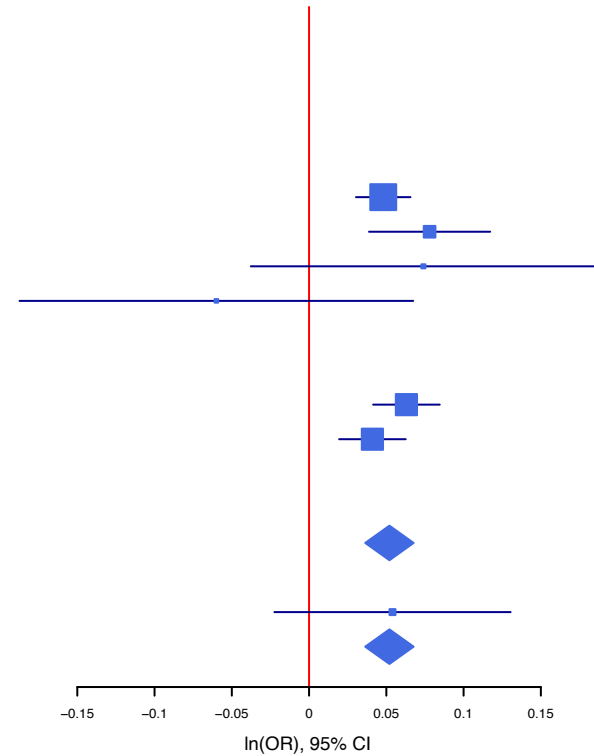

rs72934602

G/A 18:53568458  
--- het\_P: 0.96 het\_I: 0.0

|                                                    | ngt      | info        | p_value         | f_ca(n)             | f_co(n)              | ln(OR)       | STDerr       |
|----------------------------------------------------|----------|-------------|-----------------|---------------------|----------------------|--------------|--------------|
| PGC_SCZ wave3 eur only                             | 6        | 0.98        | 2.34e-10        | 0.927(53386)        | 0.918(77258)         | 0.104        | 0.016        |
| PGC_SCZ afram only                                 | -        | 0.92        | 0.476           | -(6152)             | 0.985(3918)          | 0.09         | 0.126        |
| PGC_SCZ latino only                                | -        | 0.95        | 0.3             | -(1234)             | 0.963(3090)          | 0.139        | 0.134        |
| PGC_SCZ wave2 only                                 | 0        | 0.99        | 6.56e-11        | 0.928(34850)        | 0.918(44347)         | 0.137        | 0.021        |
| PGC_SCZ wave3 (excl. wave2)                        | 6        | 0.95        | 0.0247          | 0.951(39926)        | 0.941(56676)         | 0.056        | 0.025        |
| <b>PGC_SCZ wave3 (incl. wave2)</b>                 | <b>6</b> | <b>0.97</b> | <b>1.13e-10</b> | <b>0.939(74776)</b> | <b>0.929(101023)</b> | <b>0.104</b> | <b>0.016</b> |
| Decode - Replication                               | -        | 1.00        | 0.176           | 0.922(1979)         | 0.914(142627)        | 0.09         | 0.066        |
| <b>PGC_SCZ wave3 (incl. wave2 and replication)</b> | <b>6</b> | <b>0.98</b> | <b>3.94e-11</b> | <b>0.939(76755)</b> | <b>0.92(243650)</b>  | <b>0.103</b> | <b>0.016</b> |

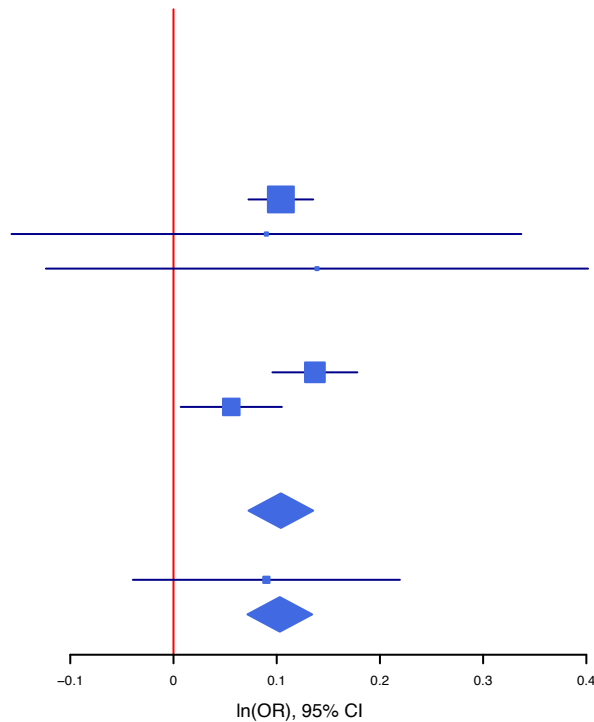

rs11165846 C/G 1:97819667  
 +- het\_P: 0.023 het\_I: 73.6

|                                                    | ngt       | info        | p_value         | f_ca(n)             | f_co(n)              | ln(OR)        | STDerr       |
|----------------------------------------------------|-----------|-------------|-----------------|---------------------|----------------------|---------------|--------------|
| PGC_SCZ wave3 eur only                             | 38        | 1.00        | 9.74e-11        | 0.754(53386)        | 0.765(77258)         | -0.065        | 0.01         |
| PGC_SCZ wave3 asn only                             | 0         | 0.98        | 0.0157          | 0.525(14004)        | 0.531(16757)         | -0.041        | 0.017        |
| PGC_SCZ afram only                                 | -         | 0.98        | 0.325           | -(6152)             | 0.756(3918)          | 0.034         | 0.034        |
| PGC_SCZ latino only                                | -         | 1.01        | 0.063           | -(1234)             | 0.628(3090)          | -0.096        | 0.052        |
| PGC_SCZ wave2 only                                 | 11        | 0.99        | 1.2e-05         | 0.744(34850)        | 0.761(44347)         | -0.055        | 0.013        |
| PGC_SCZ wave3 (excl. wave2)                        | 27        | 1.00        | 9.74e-07        | 0.676(39926)        | 0.691(56676)         | -0.054        | 0.011        |
| <b>PGC_SCZ wave3 (incl. wave2)</b>                 | <b>38</b> | <b>1.00</b> | <b>6.45e-11</b> | <b>0.703(74776)</b> | <b>0.717(101023)</b> | <b>-0.054</b> | <b>0.008</b> |
| Decode - Replication                               | -         | 1.00        | 0.439           | 0.768(1979)         | 0.767(142627)        | -0.054        | 0.07         |
| <b>PGC_SCZ wave3 (incl. wave2 and replication)</b> | <b>38</b> | <b>1.00</b> | <b>4.11e-11</b> | <b>0.704(76755)</b> | <b>0.718(243650)</b> | <b>-0.054</b> | <b>0.008</b> |

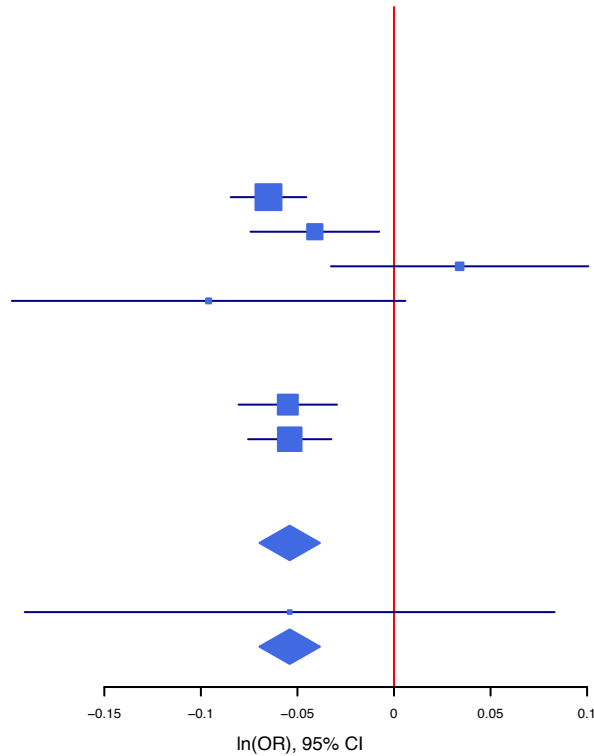

rs12943566                      A/G                      17:2157774  
 ---+                      het\_P:                      0.193    het\_I:                      39.3

|                                                    | ngt      | info        | p_value         | f_ca(n)             | f_co(n)              | ln(OR)        | STDerr       |
|----------------------------------------------------|----------|-------------|-----------------|---------------------|----------------------|---------------|--------------|
| PGC_SCZ wave3 eur only                             | 0        | 0.99        | 5.12e-08        | 0.335(53386)        | 0.347(77258)         | -0.05         | 0.009        |
| PGC_SCZ wave3 asn only                             | 0        | 0.99        | 0.000862        | 0.234(14004)        | 0.25(16757)          | -0.066        | 0.02         |
| PGC_SCZ afram only                                 | -        | 0.97        | 0.419           | -(6152)             | 0.602(3918)          | -0.024        | 0.03         |
| PGC_SCZ latino only                                | -        | 0.97        | 0.517           | -(1234)             | 0.334(3090)          | 0.034         | 0.053        |
| PGC_SCZ wave2 only                                 | 0        | 0.99        | 7.9e-08         | 0.326(34850)        | 0.342(44347)         | -0.062        | 0.012        |
| PGC_SCZ wave3 (excl. wave2)                        | 0        | 0.99        | 0.000644        | 0.367(39926)        | 0.364(56676)         | -0.037        | 0.011        |
| <b>PGC_SCZ wave3 (incl. wave2)</b>                 | <b>0</b> | <b>0.99</b> | <b>7.85e-10</b> | <b>0.351(74776)</b> | <b>0.356(101023)</b> | <b>-0.049</b> | <b>0.008</b> |
| Decode – Replication                               | -        | 1.00        | 0.00507         | 0.35(1979)          | 0.36(142627)         | -0.111        | 0.04         |
| <b>PGC_SCZ wave3 (incl. wave2 and replication)</b> | <b>0</b> | <b>0.99</b> | <b>4.31e-11</b> | <b>0.351(76755)</b> | <b>0.358(243650)</b> | <b>-0.051</b> | <b>0.008</b> |

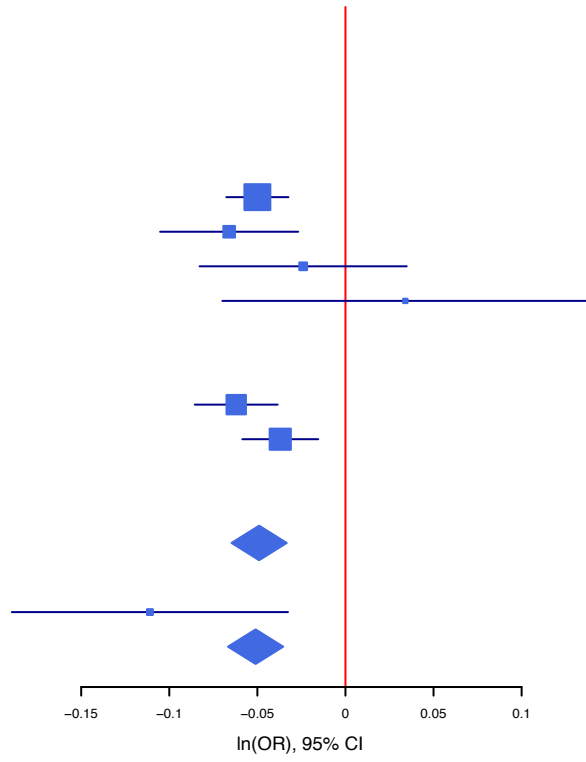

rs10767735                      G/C                      11:28642561  
 ---+                      het\_P:                      0.32    het\_I:                      12.2

|                                                    | ngt      | info        | p_value         | f_ca(n)             | f_co(n)              | ln(OR)      | STDerr       |
|----------------------------------------------------|----------|-------------|-----------------|---------------------|----------------------|-------------|--------------|
| PGC_SCZ wave3 eur only                             | 0        | 0.99        | 7.58e-08        | 0.608(53386)        | 0.598(77258)         | 0.048       | 0.009        |
| PGC_SCZ wave3 asn only                             | 0        | 0.93        | 0.00375         | 0.272(14004)        | 0.255(16757)         | 0.058       | 0.02         |
| PGC_SCZ afram only                                 | -        | 0.96        | 0.00552         | -(6152)             | 0.555(3918)          | 0.083       | 0.03         |
| PGC_SCZ latino only                                | -        | 1.01        | 0.937           | -(1234)             | 0.673(3090)          | -0.004      | 0.053        |
| PGC_SCZ wave2 only                                 | 0        | 0.99        | 0.000275        | 0.59(34850)         | 0.592(44347)         | 0.041       | 0.011        |
| PGC_SCZ wave3 (excl. wave2)                        | 0        | 0.97        | 2.93e-08        | 0.535(39926)        | 0.526(56676)         | 0.06        | 0.011        |
| <b>PGC_SCZ wave3 (incl. wave2)</b>                 | <b>0</b> | <b>0.98</b> | <b>7.15e-11</b> | <b>0.556(74776)</b> | <b>0.551(101023)</b> | <b>0.05</b> | <b>0.008</b> |
| Decode – Replication                               | -        | 1.00        | 0.402           | 0.573(1979)         | 0.603(142627)        | 0.032       | 0.038        |
| <b>PGC_SCZ wave3 (incl. wave2 and replication)</b> | <b>0</b> | <b>0.99</b> | <b>4.66e-11</b> | <b>0.556(76755)</b> | <b>0.58(243650)</b>  | <b>0.05</b> | <b>0.008</b> |

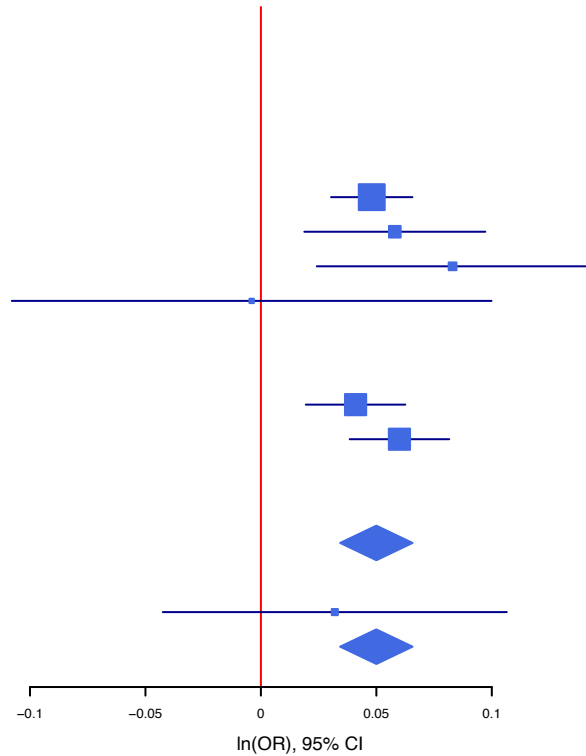

| rs4328688                                          | A/C       |             | 20:37352558     |                     | het_P:               | 0.063        | het_I:      | 63.7 |
|----------------------------------------------------|-----------|-------------|-----------------|---------------------|----------------------|--------------|-------------|------|
|                                                    | ngt       | info        | p_value         | f_ca(n)             |                      |              |             |      |
| PGC_SCZ wave3 eur only                             | 47        | 0.99        | 4.37e-07        | 0.101(53386)        | 0.095(77258)         | 0.074        | 0.015       |      |
| PGC_SCZ wave3 asn only                             | 5         | 0.94        | 0.00395         | 0.476(14004)        | 0.466(16757)         | 0.051        | 0.018       |      |
| PGC_SCZ afram only                                 | -         | 1.02        | 0.029           | -(6152)             | 0.478(3918)          | 0.064        | 0.029       |      |
| PGC_SCZ latino only                                | -         | 1.04        | 0.000388        | -(1234)             | 0.296(3090)          | 0.198        | 0.056       |      |
| PGC_SCZ wave2 only                                 | 15        | 0.98        | 0.000112        | 0.125(34850)        | 0.104(44347)         | 0.069        | 0.018       |      |
| PGC_SCZ wave3 (excl. wave2)                        | 37        | 1.00        | 4.77e-08        | 0.296(39926)        | 0.264(56676)         | 0.069        | 0.013       |      |
| <b>PGC_SCZ wave3 (incl. wave2)</b>                 | <b>52</b> | <b>0.99</b> | <b>2.53e-11</b> | <b>0.229(74776)</b> | <b>0.203(101023)</b> | <b>0.069</b> | <b>0.01</b> |      |
| Decode – Replication                               | -         | 1.00        | 0.973           | 0.103(1979)         | 0.081(142627)        | 0.002        | 0.058       |      |
| <b>PGC_SCZ wave3 (incl. wave2 and replication)</b> | <b>52</b> | <b>1.00</b> | <b>5.91e-11</b> | <b>0.226(76755)</b> | <b>0.135(243650)</b> | <b>0.067</b> | <b>0.01</b> |      |

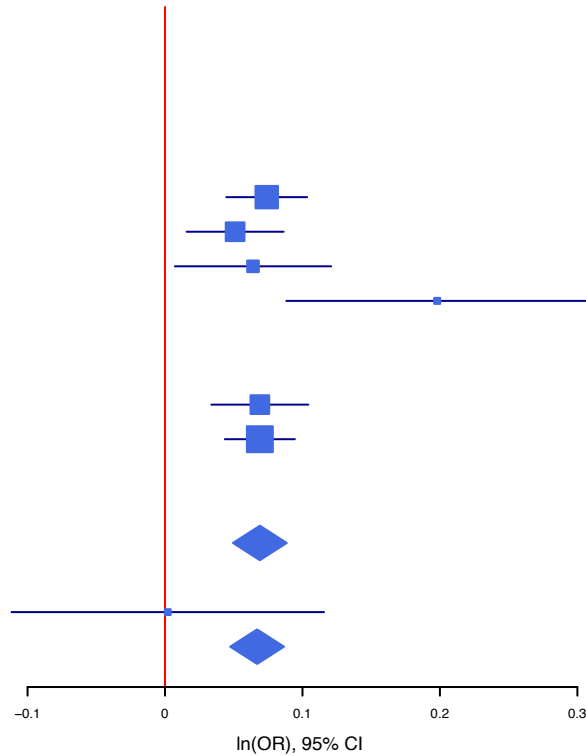

| rs217310                                           | A/T      |             | 6:84364565      |                     | het_P:               | 0.934        | het_I:       | 0.0 |
|----------------------------------------------------|----------|-------------|-----------------|---------------------|----------------------|--------------|--------------|-----|
|                                                    | ngt      | info        | p_value         | f_ca(n)             |                      |              |              |     |
| PGC_SCZ wave3 eur only                             | 0        | 1.00        | 1.17e-08        | 0.583(53386)        | 0.566(77258)         | 0.05         | 0.009        |     |
| PGC_SCZ wave3 asn only                             | 0        | 0.99        | 0.0152          | 0.589(14004)        | 0.578(16757)         | 0.042        | 0.017        |     |
| PGC_SCZ afram only                                 | -        | 0.93        | 0.079           | -(6152)             | 0.748(3918)          | 0.061        | 0.035        |     |
| PGC_SCZ latino only                                | -        | 0.99        | 0.356           | -(1234)             | 0.614(3090)          | 0.048        | 0.052        |     |
| PGC_SCZ wave2 only                                 | 0        | 1.00        | 6.01e-08        | 0.58(34850)         | 0.561(44347)         | 0.06         | 0.011        |     |
| PGC_SCZ wave3 (excl. wave2)                        | 0        | 0.99        | 0.00014         | 0.625(39926)        | 0.606(56676)         | 0.039        | 0.01         |     |
| <b>PGC_SCZ wave3 (incl. wave2)</b>                 | <b>0</b> | <b>0.99</b> | <b>9.93e-11</b> | <b>0.607(74776)</b> | <b>0.589(101023)</b> | <b>0.049</b> | <b>0.008</b> |     |
| Decode – Replication                               | -        | 1.00        | 0.408           | 0.588(1979)         | 0.557(142627)        | 0.031        | 0.038        |     |
| <b>PGC_SCZ wave3 (incl. wave2 and replication)</b> | <b>0</b> | <b>1.00</b> | <b>6.56e-11</b> | <b>0.607(76755)</b> | <b>0.571(243650)</b> | <b>0.048</b> | <b>0.007</b> |     |

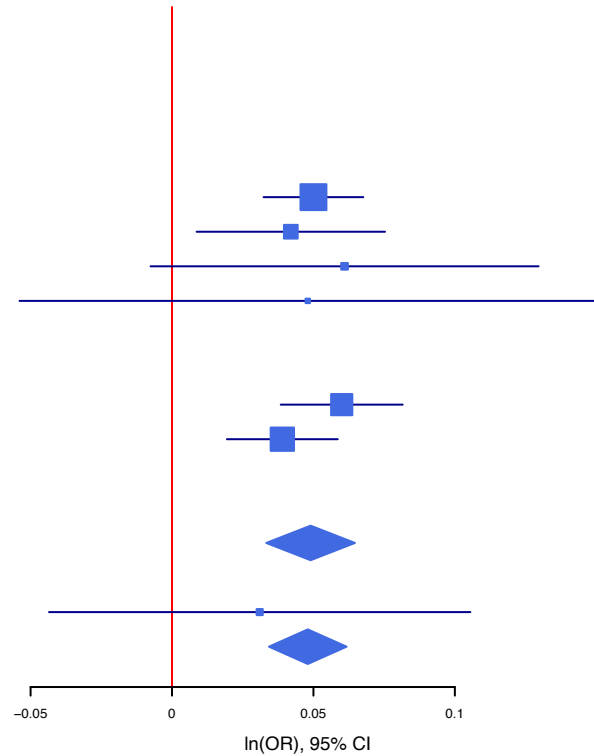



rs6804677                    T/C                    3:17856693  
 ---                    het\_P:                    0.473    het\_I:                    0.0

|                                                    | ngt      | info        | p_value         | f_ca(n)             | f_co(n)              | ln(OR)        | STDerr       |
|----------------------------------------------------|----------|-------------|-----------------|---------------------|----------------------|---------------|--------------|
| PGC_SCZ wave3 eur only                             | 1        | 0.99        | 1.09e-09        | 0.51(53386)         | 0.522(77258)         | -0.053        | 0.009        |
| PGC_SCZ wave3 asn only                             | 0        | 0.77        | 0.345           | 0.057(14004)        | 0.052(16757)         | -0.046        | 0.049        |
| PGC_SCZ afram only                                 | -        | 0.98        | 0.534           | -(6152)             | 0.433(3918)          | -0.018        | 0.03         |
| PGC_SCZ latino only                                | -        | 1.03        | 0.142           | -(1234)             | 0.311(3090)          | -0.079        | 0.054        |
| PGC_SCZ wave2 only                                 | 1        | 1.00        | 2.76e-06        | 0.482(34850)        | 0.508(44347)         | -0.052        | 0.011        |
| PGC_SCZ wave3 (excl. wave2)                        | 0        | 0.95        | 3.49e-05        | 0.356(39926)        | 0.375(56676)         | -0.049        | 0.012        |
| <b>PGC_SCZ wave3 (incl. wave2)</b>                 | <b>1</b> | <b>0.96</b> | <b>3.84e-10</b> | <b>0.405(74776)</b> | <b>0.426(101023)</b> | <b>-0.051</b> | <b>0.008</b> |
| Decode – Replication                               | -        | 1.00        | 0.0446          | 0.539(1979)         | 0.524(142627)        | -0.075        | 0.038        |
| <b>PGC_SCZ wave3 (incl. wave2 and replication)</b> | <b>1</b> | <b>0.98</b> | <b>6.57e-11</b> | <b>0.408(76755)</b> | <b>0.48(243650)</b>  | <b>-0.052</b> | <b>0.008</b> |

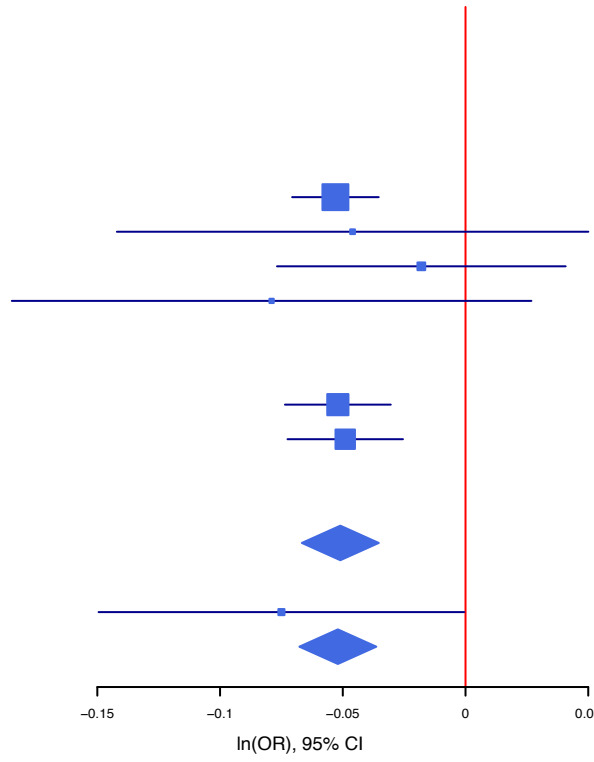

| rs1866862                                          | A/T      |             | 3:168688616     |                     | het_P:               | 0.421         | het_I:       | 0.0 |
|----------------------------------------------------|----------|-------------|-----------------|---------------------|----------------------|---------------|--------------|-----|
|                                                    | ---      |             |                 |                     |                      |               |              |     |
|                                                    | ngt      | info        | p_value         | f_ca(n)             | f_co(n)              | ln(OR)        | STDerr       |     |
| PGC_SCZ wave3 eur only                             | 5        | 0.99        | 2.73e-10        | 0.607(53386)        | 0.62(77258)          | -0.056        | 0.009        |     |
| PGC_SCZ wave3 asn only                             | 0        | 0.97        | 0.345           | 0.688(14004)        | 0.693(16757)         | -0.018        | 0.019        |     |
| PGC_SCZ afram only                                 | -        | 1.00        | 0.215           | -(6152)             | 0.295(3918)          | -0.04         | 0.032        |     |
| PGC_SCZ latino only                                | -        | 0.97        | 0.0257          | -(1234)             | 0.632(3090)          | -0.116        | 0.052        |     |
| PGC_SCZ wave2 only                                 | 0        | 0.99        | 3.17e-06        | 0.611(34850)        | 0.619(44347)         | -0.052        | 0.011        |     |
| PGC_SCZ wave3 (excl. wave2)                        | 5        | 0.98        | 6.16e-06        | 0.569(39926)        | 0.59(56676)          | -0.048        | 0.011        |     |
| <b>PGC_SCZ wave3 (incl. wave2)</b>                 | <b>5</b> | <b>0.99</b> | <b>8.5e-11</b>  | <b>0.585(74776)</b> | <b>0.602(101023)</b> | <b>-0.05</b>  | <b>0.008</b> |     |
| Decode – Replication                               | -        | 1.00        | 0.407           | 0.636(1979)         | 0.634(142627)        | -0.032        | 0.039        |     |
| <b>PGC_SCZ wave3 (incl. wave2 and replication)</b> | <b>5</b> | <b>0.99</b> | <b>7.07e-11</b> | <b>0.586(76755)</b> | <b>0.62(243650)</b>  | <b>-0.049</b> | <b>0.008</b> |     |

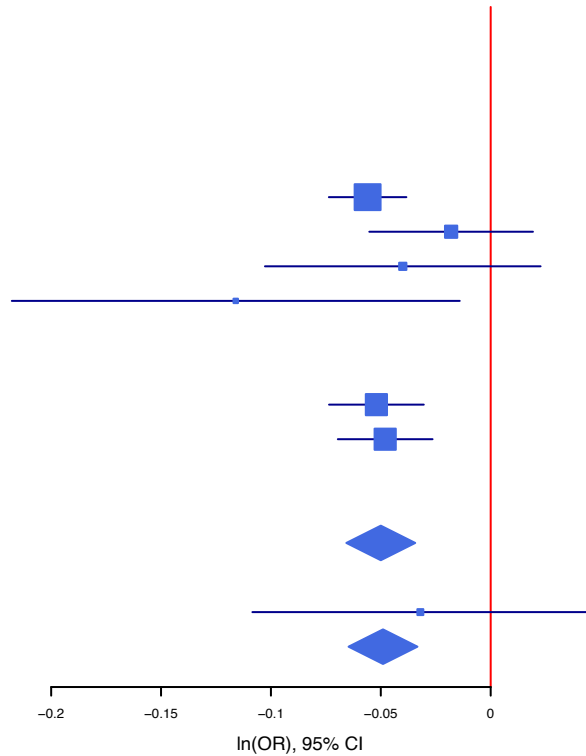

| rs2238304                                          | A/T      |             | 15:89843950     |                     | het_P:               | 0.191        | het_I:       | 39.5 |
|----------------------------------------------------|----------|-------------|-----------------|---------------------|----------------------|--------------|--------------|------|
|                                                    | ++-      |             |                 |                     |                      |              |              |      |
|                                                    | ngt      | info        | p_value         | f_ca(n)             | f_co(n)              | ln(OR)       | STDerr       |      |
| PGC_SCZ wave3 eur only                             | 0        | 0.99        | 5.44e-08        | 0.539(53386)        | 0.528(77258)         | 0.047        | 0.009        |      |
| PGC_SCZ wave3 asn only                             | 0        | 0.96        | 0.000661        | 0.569(14004)        | 0.554(16757)         | 0.059        | 0.018        |      |
| PGC_SCZ afram only                                 | -        | 0.96        | 0.0638          | -(6152)             | 0.205(3918)          | 0.07         | 0.038        |      |
| PGC_SCZ latino only                                | -        | 0.98        | 0.449           | -(1234)             | 0.55(3090)           | -0.038       | 0.05         |      |
| PGC_SCZ wave2 only                                 | 0        | 1.00        | 3.55e-06        | 0.541(34850)        | 0.527(44347)         | 0.05         | 0.011        |      |
| PGC_SCZ wave3 (excl. wave2)                        | 0        | 0.97        | 7.65e-06        | 0.482(39926)        | 0.489(56676)         | 0.047        | 0.01         |      |
| <b>PGC_SCZ wave3 (incl. wave2)</b>                 | <b>0</b> | <b>0.98</b> | <b>1.42e-10</b> | <b>0.505(74776)</b> | <b>0.504(101023)</b> | <b>0.048</b> | <b>0.008</b> |      |
| Decode – Replication                               | -        | 1.00        | 0.18            | 0.512(1979)         | 0.54(142627)         | 0.05         | 0.037        |      |
| <b>PGC_SCZ wave3 (incl. wave2 and replication)</b> | <b>0</b> | <b>0.99</b> | <b>7.63e-11</b> | <b>0.505(76755)</b> | <b>0.524(243650)</b> | <b>0.049</b> | <b>0.007</b> |      |

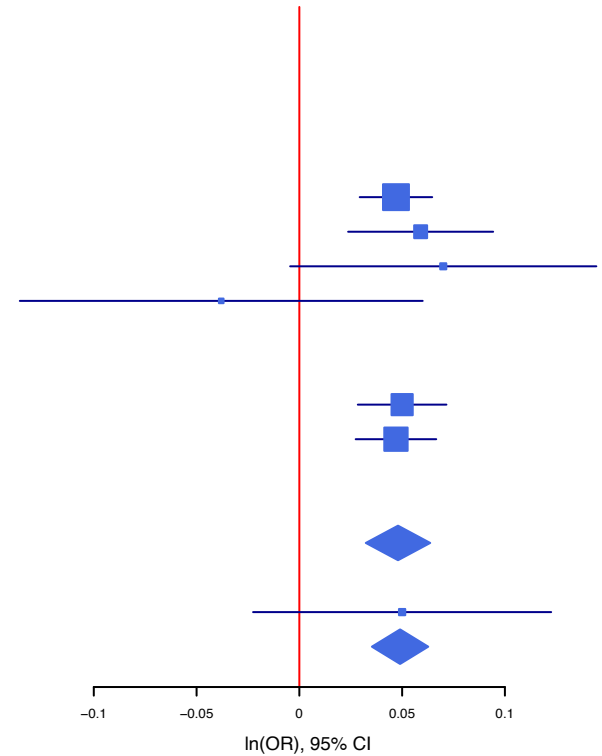

rs11241041

G/T 5:109183341  
+?? het\_P: 1.0 het\_I: 0.0

|                                                    | ngt      | info        | p_value         | f_ca(n)             | f_co(n)              | ln(OR)        | STDerr       |
|----------------------------------------------------|----------|-------------|-----------------|---------------------|----------------------|---------------|--------------|
| PGC_SCZ wave3 eur only                             | 0        | 1.00        | 6.12e-07        | 0.822(53386)        | 0.829(77258)         | -0.057        | 0.011        |
| PGC_SCZ wave3 asn only                             | 0        | 0.95        | 0.000221        | 0.359(14004)        | 0.367(16757)         | -0.068        | 0.018        |
| PGC_SCZ wave2 only                                 | 0        | 1.01        | 1.17e-06        | 0.792(34850)        | 0.816(44347)         | -0.068        | 0.014        |
| PGC_SCZ wave3 (excl. wave2)                        | 0        | 0.98        | 9.08e-05        | 0.655(39926)        | 0.685(56676)         | -0.052        | 0.013        |
| <b>PGC_SCZ wave3 (incl. wave2)</b>                 | <b>0</b> | <b>0.99</b> | <b>5.35e-10</b> | <b>0.726(74776)</b> | <b>0.747(101023)</b> | <b>-0.06</b>  | <b>0.01</b>  |
| Decode - Replication                               | -        | 1.00        | 0.0397          | 0.826(1979)         | 0.857(142627)        | -0.098        | 0.048        |
| <b>PGC_SCZ wave3 (incl. wave2 and replication)</b> | <b>0</b> | <b>1.00</b> | <b>8.48e-11</b> | <b>0.729(76755)</b> | <b>0.814(243650)</b> | <b>-0.061</b> | <b>0.009</b> |

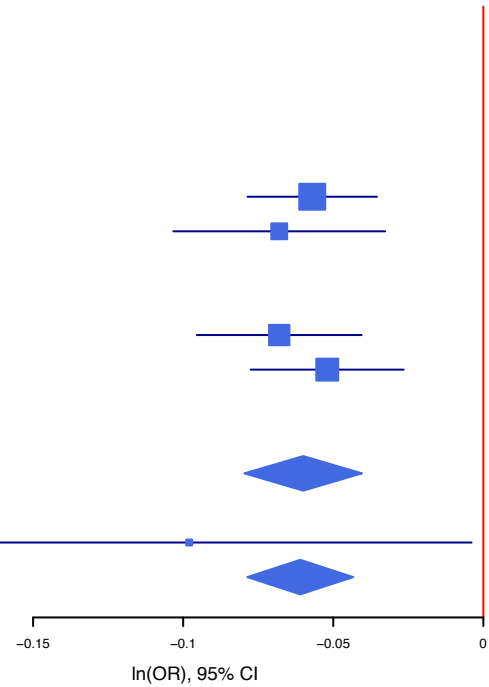

|                                                    | G/A      |             | 13:56928696     |                     | het_P:               | 0.365        | het_I:      | 0.7 |
|----------------------------------------------------|----------|-------------|-----------------|---------------------|----------------------|--------------|-------------|-----|
|                                                    | ngt      | info        | p_value         | f_ca(n)             |                      |              |             |     |
| PGC_SCZ wave3 eur only                             | 0        | 0.98        | 2.84e-07        | 0.82(53386)         | 0.813(77258)         | 0.058        | 0.011       |     |
| PGC_SCZ wave3 asn only                             | 0        | 0.96        | 3.92e-06        | 0.836(14004)        | 0.823(16757)         | 0.106        | 0.023       |     |
| PGC_SCZ afram only                                 | -        | 0.94        | 0.606           | -(6152)             | 0.816(3918)          | 0.02         | 0.039       |     |
| PGC_SCZ latino only                                | -        | 0.98        | 0.842           | -(1234)             | 0.799(3090)          | 0.013        | 0.063       |     |
| PGC_SCZ wave2 only                                 | 0        | 0.99        | 2.89e-05        | 0.823(34850)        | 0.816(44347)         | 0.059        | 0.014       |     |
| PGC_SCZ wave3 (excl. wave2)                        | 0        | 0.97        | 5.89e-07        | 0.817(39926)        | 0.812(56676)         | 0.066        | 0.013       |     |
| <b>PGC_SCZ wave3 (incl. wave2)</b>                 | <b>0</b> | <b>0.98</b> | <b>8.98e-11</b> | <b>0.819(74776)</b> | <b>0.813(101023)</b> | <b>0.063</b> | <b>0.01</b> |     |
| Decode – Replication                               | -        | 1.00        | 0.399           | 0.811(1979)         | 0.81(142627)         | 0.039        | 0.047       |     |
| <b>PGC_SCZ wave3 (incl. wave2 and replication)</b> | <b>0</b> | <b>0.99</b> | <b>8.58e-11</b> | <b>0.819(76755)</b> | <b>0.811(243650)</b> | <b>0.062</b> | <b>0.01</b> |     |

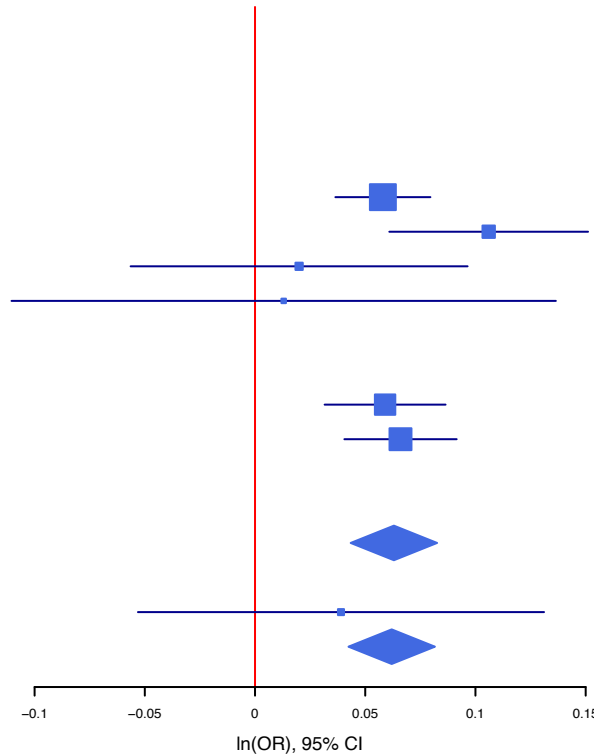

| rs7701188                                          | G/A       |             | 5:88744550      |                     | het_P:               | 0.332        | het_I:       | 9.4 |
|----------------------------------------------------|-----------|-------------|-----------------|---------------------|----------------------|--------------|--------------|-----|
|                                                    | ngt       | info        | p_value         | f_ca(n)             |                      |              |              |     |
| PGC_SCZ wave3 eur only                             | 12        | 0.98        | 3.4e-10         | 0.881(53386)        | 0.87(77258)          | 0.083        | 0.013        |     |
| PGC_SCZ wave3 asn only                             | 4         | 0.92        | 0.561           | 0.974(14004)        | 0.975(16757)         | -0.033       | 0.056        |     |
| PGC_SCZ afram only                                 | -         | 0.98        | 0.0145          | -(6152)             | 0.669(3918)          | 0.077        | 0.032        |     |
| PGC_SCZ latino only                                | -         | 0.99        | 0.484           | -(1234)             | 0.93(3090)           | -0.068       | 0.096        |     |
| PGC_SCZ wave2 only                                 | 12        | 0.97        | 9.31e-07        | 0.886(34850)        | 0.875(44347)         | 0.083        | 0.017        |     |
| PGC_SCZ wave3 (excl. wave2)                        | 4         | 0.97        | 5.06e-05        | 0.87(39926)         | 0.871(56676)         | 0.067        | 0.016        |     |
| <b>PGC_SCZ wave3 (incl. wave2)</b>                 | <b>16</b> | <b>0.97</b> | <b>2.81e-10</b> | <b>0.876(74776)</b> | <b>0.872(101023)</b> | <b>0.075</b> | <b>0.012</b> |     |
| Decode – Replication                               | -         | 1.00        | 0.169           | 0.896(1979)         | 0.891(142627)        | 0.077        | 0.056        |     |
| <b>PGC_SCZ wave3 (incl. wave2 and replication)</b> | <b>16</b> | <b>0.98</b> | <b>9.31e-11</b> | <b>0.876(76755)</b> | <b>0.882(243650)</b> | <b>0.075</b> | <b>0.012</b> |     |

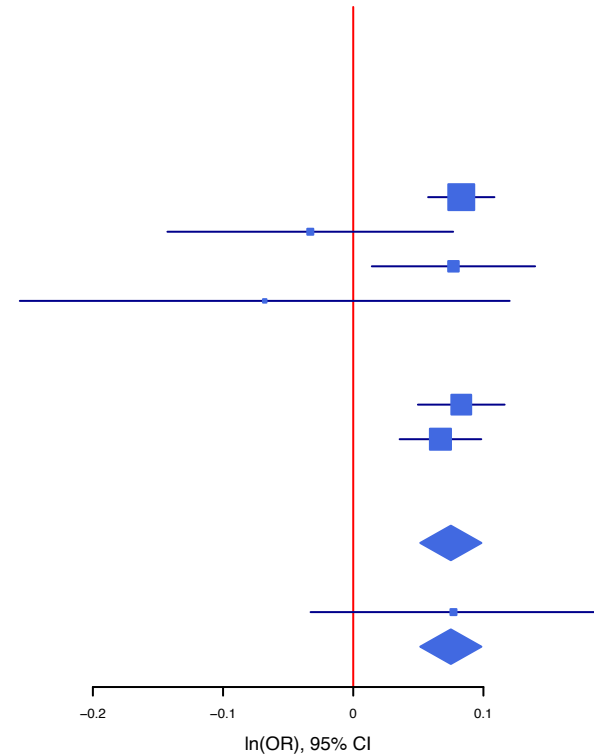

rs13080668

T/C

3:53443354

+-

het\_P:

0.011

het\_I:

77.8

|                                                    | ngt       | info        | p_value         | f_ca(n)             | f_co(n)              | ln(OR)       | STDerr       |
|----------------------------------------------------|-----------|-------------|-----------------|---------------------|----------------------|--------------|--------------|
| PGC_SCZ wave3 eur only                             | 20        | 1.00        | 1.38e-10        | 0.704(53386)        | 0.691(77258)         | 0.06         | 0.009        |
| PGC_SCZ wave3 asn only                             | 4         | 0.99        | 0.0234          | 0.684(14004)        | 0.677(16757)         | 0.042        | 0.018        |
| PGC_SCZ afram only                                 | -         | 0.98        | 0.114           | -(6152)             | 0.889(3918)          | -0.075       | 0.048        |
| PGC_SCZ latino only                                | -         | 0.99        | 0.789           | -(1234)             | 0.55(3090)           | -0.014       | 0.051        |
| PGC_SCZ wave2 only                                 | 20        | 1.00        | 3.74e-05        | 0.698(34850)        | 0.689(44347)         | 0.048        | 0.012        |
| PGC_SCZ wave3 (excl. wave2)                        | 4         | 0.99        | 2.54e-06        | 0.709(39926)        | 0.698(56676)         | 0.053        | 0.011        |
| <b>PGC_SCZ wave3 (incl. wave2)</b>                 | <b>24</b> | <b>0.99</b> | <b>3.19e-10</b> | <b>0.705(74776)</b> | <b>0.695(101023)</b> | <b>0.051</b> | <b>0.008</b> |
| Decode – Replication                               | -         | 1.00        | 0.0992          | 0.688(1979)         | 0.704(142627)        | 0.067        | 0.041        |
| <b>PGC_SCZ wave3 (incl. wave2 and replication)</b> | <b>24</b> | <b>1.00</b> | <b>9.64e-11</b> | <b>0.705(76755)</b> | <b>0.7(243650)</b>   | <b>0.051</b> | <b>0.008</b> |

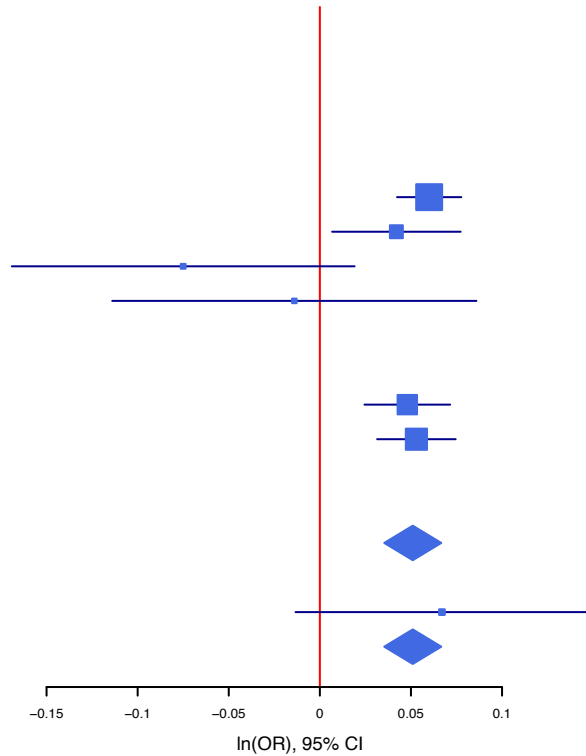

| rs7113199                                          | A/C       |             | 11:134247187    |                     |                      |              |              |
|----------------------------------------------------|-----------|-------------|-----------------|---------------------|----------------------|--------------|--------------|
|                                                    | +++       | het_P:      | 0.176           | het_I:              | 42.5                 |              |              |
|                                                    | ngt       | info        | p_value         | f_ca(n)             | f_co(n)              | ln(OR)       | STDerr       |
| PGC_SCZ wave3 eur only                             | 31        | 0.99        | 2.8e-08         | 0.303(53386)        | 0.296(77258)         | 0.052        | 0.009        |
| PGC_SCZ wave3 asn only                             | 6         | 0.94        | 0.0828          | 0.09(14004)         | 0.084(16757)         | 0.055        | 0.032        |
| PGC_SCZ afram only                                 | -         | 0.98        | 0.654           | -(6152)             | 0.346(3918)          | 0.014        | 0.031        |
| PGC_SCZ latino only                                | -         | 1.00        | 0.0215          | -(1234)             | 0.236(3090)          | 0.133        | 0.058        |
| PGC_SCZ wave2 only                                 | 30        | 0.99        | 3.22e-05        | 0.296(34850)        | 0.296(44347)         | 0.05         | 0.012        |
| PGC_SCZ wave3 (excl. wave2)                        | 7         | 0.98        | 1.6e-05         | 0.247(39926)        | 0.244(56676)         | 0.053        | 0.012        |
| <b>PGC_SCZ wave3 (incl. wave2)</b>                 | <b>37</b> | <b>0.98</b> | <b>1.93e-09</b> | <b>0.266(74776)</b> | <b>0.264(101023)</b> | <b>0.051</b> | <b>0.008</b> |
| Decode – Replication                               | -         | 1.00        | 0.00711         | 0.269(1979)         | 0.265(142627)        | 0.113        | 0.042        |
| <b>PGC_SCZ wave3 (incl. wave2 and replication)</b> | <b>37</b> | <b>0.99</b> | <b>1.12e-10</b> | <b>0.266(76755)</b> | <b>0.264(243650)</b> | <b>0.054</b> | <b>0.008</b> |

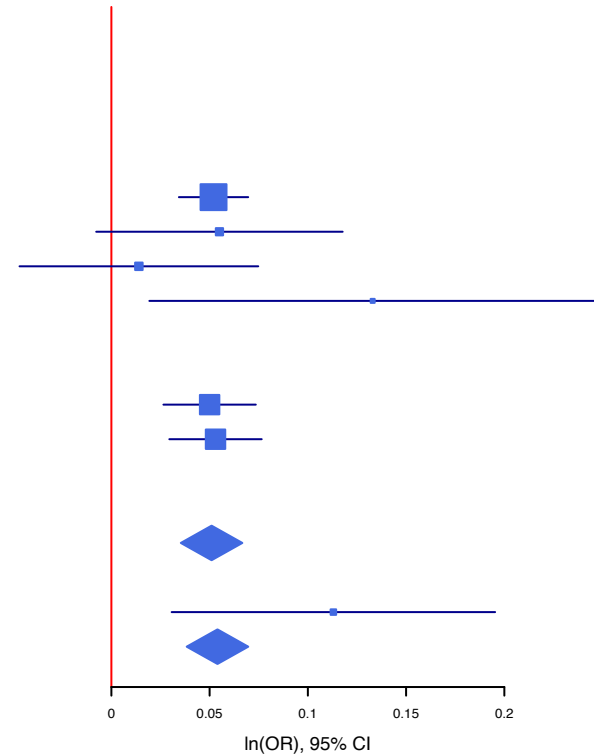



rs4793888                      G/A                      17:55737740  
 ++-                      het\_P:                      0.304    het\_I:                      16.1

|                                                    | ngt      | info        | p_value         | f_ca(n)             | f_co(n)              | ln(OR)        | STDerr       |
|----------------------------------------------------|----------|-------------|-----------------|---------------------|----------------------|---------------|--------------|
| PGC_SCZ wave3 eur only                             | 0        | 0.99        | 9.69e-07        | 0.828(53386)        | 0.835(77258)         | -0.056        | 0.012        |
| PGC_SCZ wave3 asn only                             | 0        | 0.95        | 7.01e-05        | 0.609(14004)        | 0.619(16757)         | -0.072        | 0.018        |
| PGC_SCZ afram only                                 | -        | 0.96        | 0.875           | -(6152)             | 0.918(3918)          | -0.009        | 0.054        |
| PGC_SCZ latino only                                | -        | 1.01        | 0.839           | -(1234)             | 0.73(3090)           | 0.012         | 0.057        |
| PGC_SCZ wave2 only                                 | 0        | 0.99        | 8.41e-05        | 0.813(34850)        | 0.827(44347)         | -0.056        | 0.014        |
| PGC_SCZ wave3 (excl. wave2)                        | 0        | 0.98        | 3.47e-06        | 0.78(39926)         | 0.786(56676)         | -0.059        | 0.013        |
| <b>PGC_SCZ wave3 (incl. wave2)</b>                 | <b>0</b> | <b>0.98</b> | <b>1.12e-09</b> | <b>0.793(74776)</b> | <b>0.802(101023)</b> | <b>-0.057</b> | <b>0.009</b> |
| Decode – Replication                               | -        | 1.00        | 0.0205          | 0.805(1979)         | 0.814(142627)        | -0.11         | 0.047        |
| <b>PGC_SCZ wave3 (incl. wave2 and replication)</b> | <b>0</b> | <b>0.99</b> | <b>1.2e-10</b>  | <b>0.793(76755)</b> | <b>0.809(243650)</b> | <b>-0.059</b> | <b>0.009</b> |

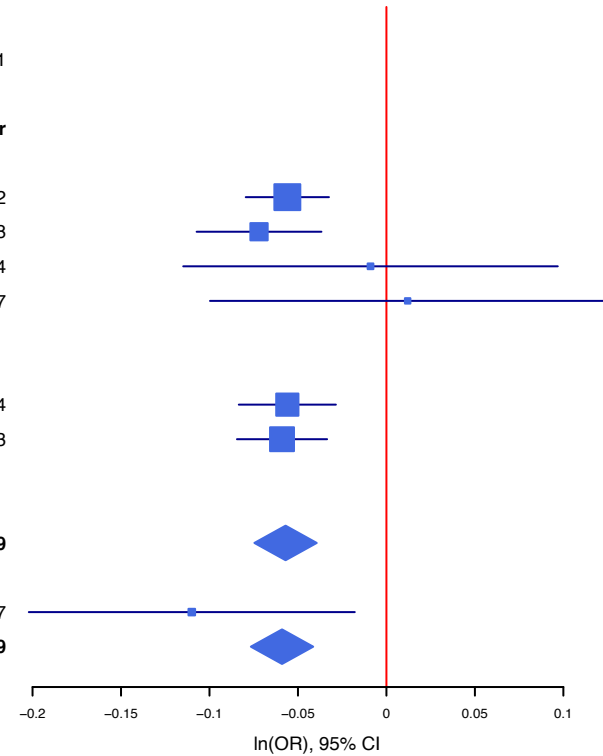

|                                                    | G/A       |             | 2:134840967     |                     | het_P:               | 0.499        | het_I:       | 0.0 |
|----------------------------------------------------|-----------|-------------|-----------------|---------------------|----------------------|--------------|--------------|-----|
|                                                    | ngt       | info        | p_value         | f_ca(n)             |                      |              |              |     |
| PGC_SCZ wave3 eur only                             | 66        | 1.01        | 1.42e-06        | 0.816(53386)        | 0.811(77258)         | 0.053        | 0.011        |     |
| PGC_SCZ wave3 asn only                             | 7         | 0.97        | 8.65e-05        | 0.603(14004)        | 0.587(16757)         | 0.069        | 0.018        |     |
| PGC_SCZ afram only                                 | -         | 1.00        | 0.354           | -(6152)             | 0.53(3918)           | 0.027        | 0.03         |     |
| PGC_SCZ latino only                                | -         | 0.99        | 0.707           | -(1234)             | 0.65(3090)           | 0.02         | 0.053        |     |
| PGC_SCZ wave2 only                                 | 29        | 1.00        | 0.000461        | 0.806(34850)        | 0.808(44347)         | 0.048        | 0.014        |     |
| PGC_SCZ wave3 (excl. wave2)                        | 44        | 0.99        | 4.02e-07        | 0.678(39926)        | 0.694(56676)         | 0.058        | 0.011        |     |
| <b>PGC_SCZ wave3 (incl. wave2)</b>                 | <b>73</b> | <b>1.00</b> | <b>6.71e-10</b> | <b>0.728(74776)</b> | <b>0.738(101023)</b> | <b>0.054</b> | <b>0.009</b> |     |
| Decode – Replication                               | -         | 1.00        | 0.0672          | 0.789(1979)         | 0.801(142627)        | 0.089        | 0.048        |     |
| <b>PGC_SCZ wave3 (incl. wave2 and replication)</b> | <b>73</b> | <b>1.00</b> | <b>1.26e-10</b> | <b>0.729(76755)</b> | <b>0.773(243650)</b> | <b>0.055</b> | <b>0.009</b> |     |

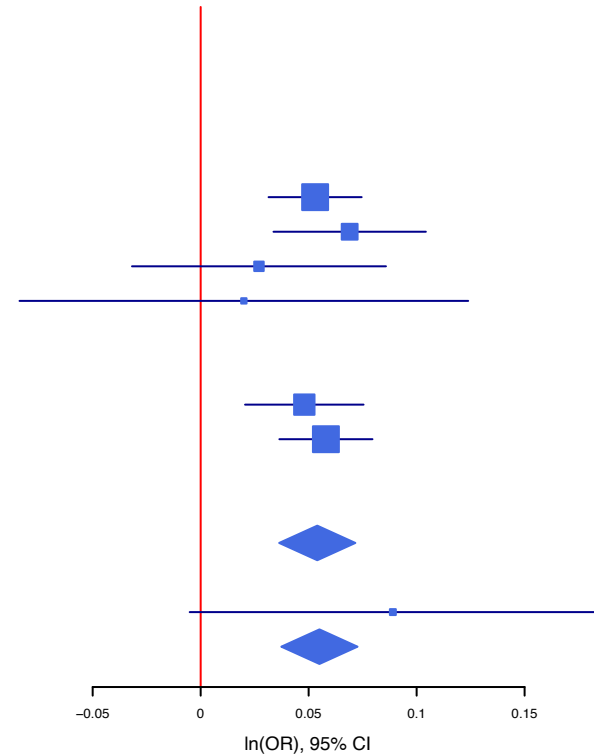

rs35734242                    T/C                    4:706700  
 ---                    het\_P:                    0.003    het\_I:                    82.3

|                                                    | ngt      | info        | p_value         | f_ca(n)             | f_co(n)              | ln(OR)        | STDerr       |
|----------------------------------------------------|----------|-------------|-----------------|---------------------|----------------------|---------------|--------------|
| PGC_SCZ wave3 eur only                             | 1        | 0.95        | 1.37e-08        | 0.562(53386)        | 0.574(77258)         | -0.051        | 0.009        |
| PGC_SCZ wave3 asn only                             | 0        | 0.92        | 0.00835         | 0.542(14004)        | 0.556(16757)         | -0.047        | 0.018        |
| PGC_SCZ afram only                                 | -        | 0.99        | 0.662           | -(6152)             | 0.702(3918)          | -0.014        | 0.032        |
| PGC_SCZ latino only                                | -        | 1.00        | 3.84e-05        | -(1234)             | 0.69(3090)           | -0.219        | 0.053        |
| PGC_SCZ wave2 only                                 | 1        | 0.92        | 0.00127         | 0.562(34850)        | 0.571(44347)         | -0.037        | 0.011        |
| PGC_SCZ wave3 (excl. wave2)                        | 0        | 0.97        | 8.58e-10        | 0.61(39926)         | 0.608(56676)         | -0.064        | 0.01         |
| <b>PGC_SCZ wave3 (incl. wave2)</b>                 | <b>1</b> | <b>0.95</b> | <b>2.24e-11</b> | <b>0.591(74776)</b> | <b>0.594(101023)</b> | <b>-0.051</b> | <b>0.008</b> |
| Decode – Replication                               | -        | 1.00        | 0.518           | 0.571(1979)         | 0.559(142627)        | 0.025         | 0.039        |
| <b>PGC_SCZ wave3 (incl. wave2 and replication)</b> | <b>1</b> | <b>0.98</b> | <b>1.36e-10</b> | <b>0.591(76755)</b> | <b>0.575(243650)</b> | <b>-0.048</b> | <b>0.008</b> |

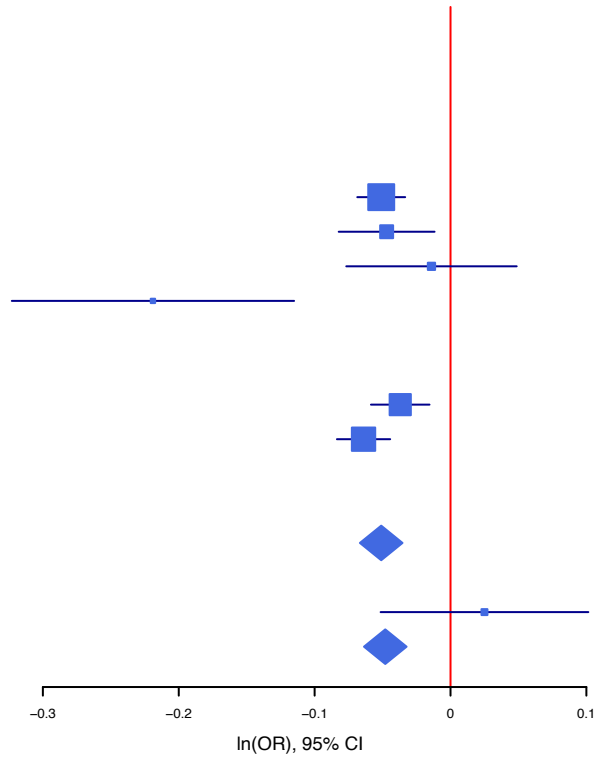

| rs6125656                                          | G/A      |             | 20:48090779     |                     | het_P:               | 0.459         | het_I:      | 0.0 |
|----------------------------------------------------|----------|-------------|-----------------|---------------------|----------------------|---------------|-------------|-----|
|                                                    | ngt      | info        | p_value         | f_ca(n)             |                      |               |             |     |
| PGC_SCZ wave3 eur only                             | 6        | 0.99        | 6.29e-09        | 0.809(53386)        | 0.819(77258)         | -0.064        | 0.011       |     |
| PGC_SCZ wave3 asn only                             | 0        | 0.93        | 0.016           | 0.914(14004)        | 0.919(16757)         | -0.077        | 0.032       |     |
| PGC_SCZ afram only                                 | -        | 0.97        | 0.613           | -(6152)             | 0.85(3918)           | -0.021        | 0.042       |     |
| PGC_SCZ latino only                                | -        | 1.01        | 0.128           | -(1234)             | 0.888(3090)          | -0.116        | 0.076       |     |
| PGC_SCZ wave2 only                                 | 1        | 0.99        | 1.02e-06        | 0.816(34850)        | 0.823(44347)         | -0.069        | 0.014       |     |
| PGC_SCZ wave3 (excl. wave2)                        | 5        | 0.97        | 4.14e-05        | 0.855(39926)        | 0.855(56676)         | -0.059        | 0.014       |     |
| <b>PGC_SCZ wave3 (incl. wave2)</b>                 | <b>6</b> | <b>0.98</b> | <b>2.2e-10</b>  | <b>0.839(74776)</b> | <b>0.843(101023)</b> | <b>-0.064</b> | <b>0.01</b> |     |
| Decode – Replication                               | -        | 1.00        | 0.305           | 0.808(1979)         | 0.808(142627)        | -0.048        | 0.047       |     |
| <b>PGC_SCZ wave3 (incl. wave2 and replication)</b> | <b>6</b> | <b>0.99</b> | <b>1.44e-10</b> | <b>0.838(76755)</b> | <b>0.824(243650)</b> | <b>-0.063</b> | <b>0.01</b> |     |

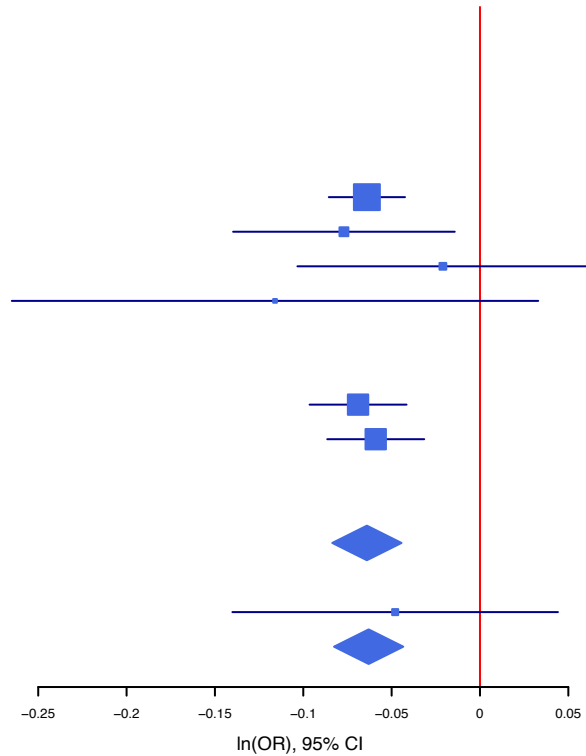

| rs2252865                                          | T/C       |             | 1:8422676       |                     | het_P:               | 0.426        | het_I:       | 0.0 |
|----------------------------------------------------|-----------|-------------|-----------------|---------------------|----------------------|--------------|--------------|-----|
|                                                    | ngt       | info        | p_value         | f_ca(n)             |                      |              |              |     |
| PGC_SCZ wave3 eur only                             | 50        | 1.00        | 2.64e-08        | 0.341(53386)        | 0.334(77258)         | 0.051        | 0.009        |     |
| PGC_SCZ wave3 asn only                             | 7         | 0.94        | 0.00482         | 0.114(14004)        | 0.102(16757)         | 0.084        | 0.03         |     |
| PGC_SCZ afram only                                 | -         | 0.99        | 0.618           | -(6152)             | 0.197(3918)          | 0.018        | 0.037        |     |
| PGC_SCZ latino only                                | -         | 1.04        | 0.0675          | -(1234)             | 0.22(3090)           | 0.106        | 0.058        |     |
| PGC_SCZ wave2 only                                 | 14        | 1.00        | 4.1e-05         | 0.331(34850)        | 0.328(44347)         | 0.048        | 0.012        |     |
| PGC_SCZ wave3 (excl. wave2)                        | 43        | 0.99        | 1.4e-06         | 0.236(39926)        | 0.245(56676)         | 0.059        | 0.012        |     |
| <b>PGC_SCZ wave3 (incl. wave2)</b>                 | <b>57</b> | <b>0.99</b> | <b>2.76e-10</b> | <b>0.273(74776)</b> | <b>0.277(101023)</b> | <b>0.053</b> | <b>0.008</b> |     |
| Decode – Replication                               | -         | 1.00        | 0.231           | 0.298(1979)         | 0.318(142627)        | 0.048        | 0.04         |     |
| <b>PGC_SCZ wave3 (incl. wave2 and replication)</b> | <b>57</b> | <b>1.00</b> | <b>1.47e-10</b> | <b>0.274(76755)</b> | <b>0.3(243650)</b>   | <b>0.053</b> | <b>0.008</b> |     |

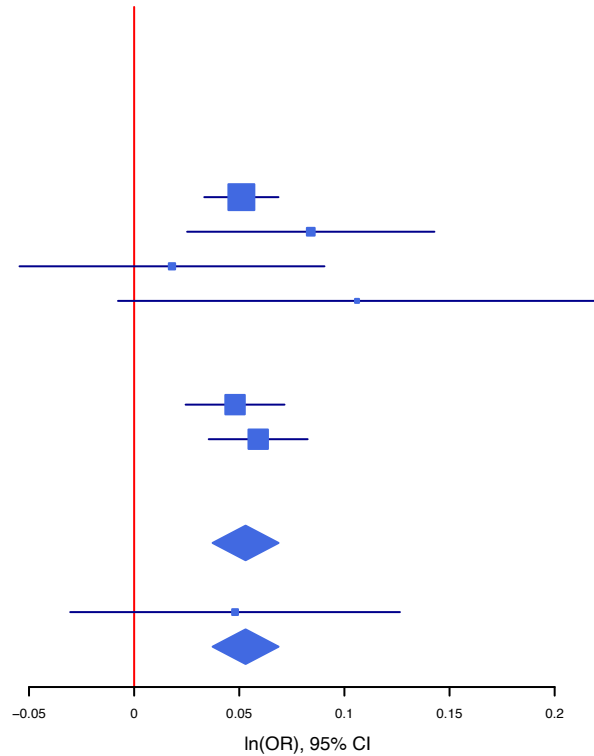

|                                                    | G/C      |             | 14:99733384     |                     | het_P:               | 0.316        | het_I:       | 13.2 |
|----------------------------------------------------|----------|-------------|-----------------|---------------------|----------------------|--------------|--------------|------|
|                                                    | ngt      | info        | p_value         | f_ca(n)             |                      |              |              |      |
| PGC_SCZ wave3 eur only                             | 0        | 0.86        | 2.21e-09        | 0.542(53386)        | 0.525(77258)         | 0.056        | 0.009        |      |
| PGC_SCZ wave3 asn only                             | 0        | 0.58        | 0.212           | 0.888(14004)        | 0.89(16757)          | 0.045        | 0.036        |      |
| PGC_SCZ afram only                                 | -        | 0.89        | 0.0118          | -(6152)             | 0.907(3918)          | 0.139        | 0.055        |      |
| PGC_SCZ latino only                                | -        | 0.84        | 0.477           | -(1234)             | 0.714(3090)          | 0.043        | 0.06         |      |
| PGC_SCZ wave2 only                                 | 0        | 0.85        | 5.57e-09        | 0.559(34850)        | 0.531(44347)         | 0.069        | 0.012        |      |
| PGC_SCZ wave3 (excl. wave2)                        | 0        | 0.80        | 0.00136         | 0.727(39926)        | 0.693(56676)         | 0.042        | 0.013        |      |
| <b>PGC_SCZ wave3 (incl. wave2)</b>                 | <b>0</b> | <b>0.82</b> | <b>9.65e-11</b> | <b>0.661(74776)</b> | <b>0.631(101023)</b> | <b>0.057</b> | <b>0.009</b> |      |
| Decode – Replication                               | -        | 0.99        | 0.707           | 0.542(1979)         | 0.525(142627)        | 0.014        | 0.037        |      |
| <b>PGC_SCZ wave3 (incl. wave2 and replication)</b> | <b>0</b> | <b>0.92</b> | <b>1.79e-10</b> | <b>0.658(76755)</b> | <b>0.573(243650)</b> | <b>0.055</b> | <b>0.009</b> |      |

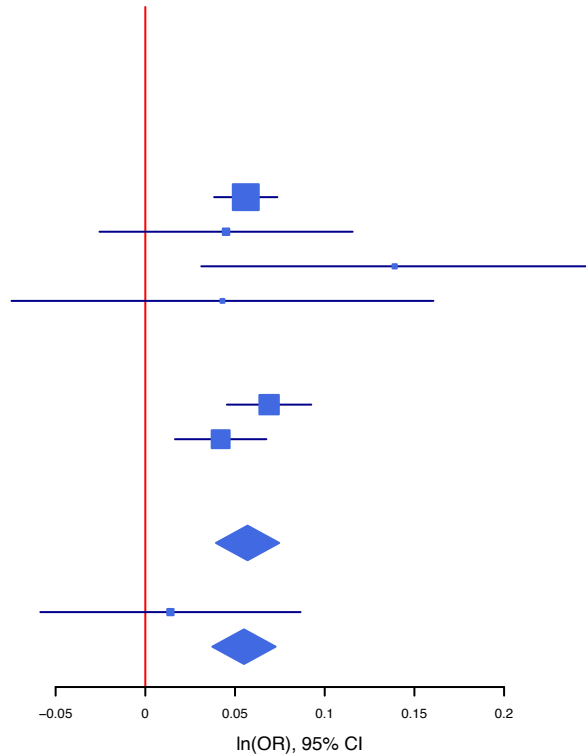

rs72974238

C/A  
---  
het\_P: 0.649 het\_I: 0.0

ngt info p\_value f\_ca(n) f\_co(n) ln(OR) STDerr

PGC\_SCZ wave3 eur only 0 1.00 8.74e-09 0.68(53386) 0.669(77258) 0.053 0.009  
PGC\_SCZ wave3 asn only 0 1.00 0.0106 0.712(14004) 0.698(16757) 0.048 0.019  
PGC\_SCZ afram only - 0.95 0.177 -(6152) 0.87(3918) 0.06 0.045  
PGC\_SCZ latino only - 0.96 0.953 -(1234) 0.66(3090) 0.003 0.053

PGC\_SCZ wave2 only 0 1.00 1.23e-07 0.682(34850) 0.668(44347) 0.061 0.012  
PGC\_SCZ wave3 (excl. wave2) 0 0.98 0.00018 0.72(39926) 0.705(56676) 0.042 0.011

**PGC\_SCZ wave3 (incl. wave2) 0 0.99 1.63e-10 0.705(74776) 0.691(101023) 0.051 0.008**

Decode - Replication - 1.00 0.533 0.649(1979) 0.67(142627) 0.026 0.041

**PGC\_SCZ wave3 (incl. wave2 and replication) 0 1.00 1.82e-10 0.704(76755) 0.679(243650) 0.05 0.008**

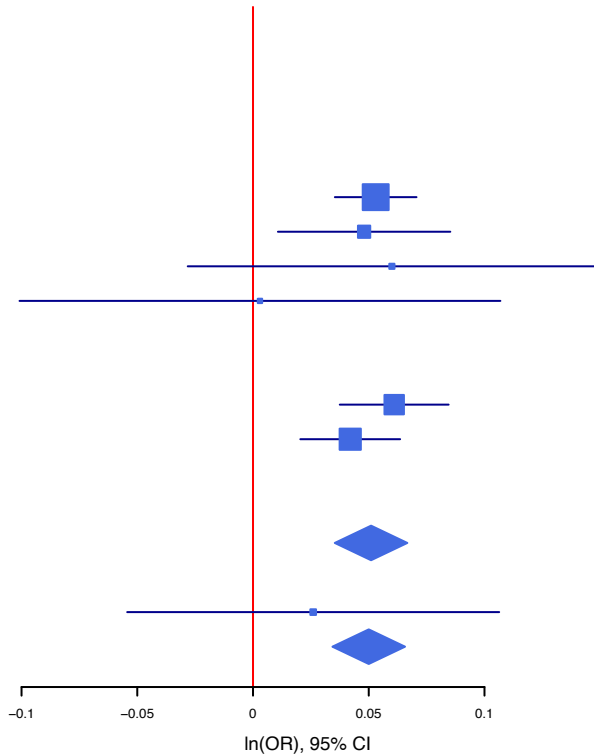

| rs9398171                                          | C/T      |             | 6:108983527     |                     | het_P:               | 0.975        | het_I:       | 0.0 |
|----------------------------------------------------|----------|-------------|-----------------|---------------------|----------------------|--------------|--------------|-----|
|                                                    | ngt      | info        | p_value         | f_ca(n)             |                      |              |              |     |
| PGC_SCZ wave3 eur only                             | 2        | 1.00        | 1.84e-06        | 0.309(53386)        | 0.297(77258)         | 0.045        | 0.009        |     |
| PGC_SCZ wave3 asn only                             | 0        | 0.98        | 8.68e-05        | 0.281(14004)        | 0.269(16757)         | 0.075        | 0.019        |     |
| PGC_SCZ afram only                                 | -        | 0.99        | 0.15            | -(6152)             | 0.759(3918)          | 0.051        | 0.035        |     |
| PGC_SCZ latino only                                | -        | 1.01        | 0.445           | -(1234)             | 0.384(3090)          | 0.039        | 0.051        |     |
| PGC_SCZ wave2 only                                 | 1        | 1.00        | 2.86e-06        | 0.303(34850)        | 0.293(44347)         | 0.056        | 0.012        |     |
| PGC_SCZ wave3 (excl. wave2)                        | 1        | 0.99        | 3.45e-05        | 0.41(39926)         | 0.376(56676)         | 0.046        | 0.011        |     |
| <b>PGC_SCZ wave3 (incl. wave2)</b>                 | <b>2</b> | <b>0.99</b> | <b>4.48e-10</b> | <b>0.368(74776)</b> | <b>0.344(101023)</b> | <b>0.05</b>  | <b>0.008</b> |     |
| Decode – Replication                               | -        | 1.00        | 0.164           | 0.349(1979)         | 0.355(142627)        | 0.06         | 0.043        |     |
| <b>PGC_SCZ wave3 (incl. wave2 and replication)</b> | <b>2</b> | <b>1.00</b> | <b>2.02e-10</b> | <b>0.368(76755)</b> | <b>0.35(243650)</b>  | <b>0.051</b> | <b>0.008</b> |     |

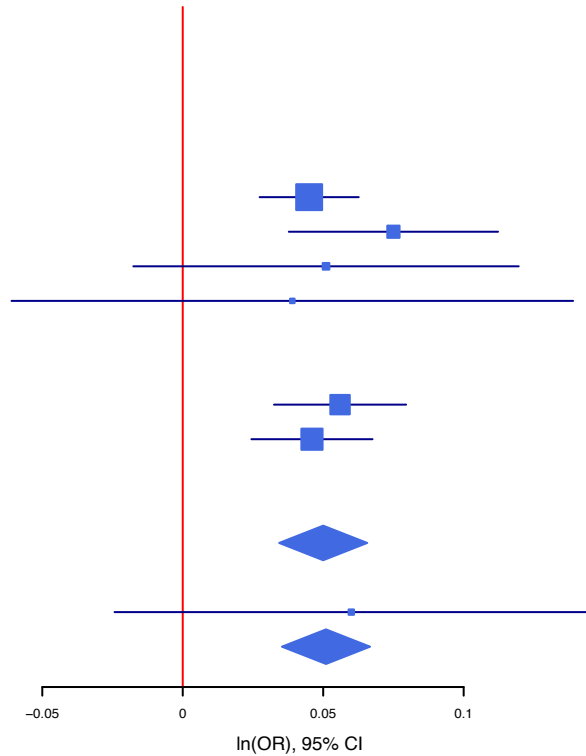



rs12138231                    T/A                    1:150115398  
 +++                    het\_P:                    0.955    het\_I:                    0.0

|                                                    | ngt      | info        | p_value         | f_ca(n)             | f_co(n)              | ln(OR)        | STDerr       |
|----------------------------------------------------|----------|-------------|-----------------|---------------------|----------------------|---------------|--------------|
| PGC_SCZ wave3 eur only                             | 1        | 0.95        | 7.99e-09        | 0.171(53386)        | 0.183(77258)         | -0.067        | 0.012        |
| PGC_SCZ afram only                                 | -        | 0.93        | 0.0386          | -(6152)             | 0.532(3918)          | -0.064        | 0.031        |
| PGC_SCZ latino only                                | -        | 0.95        | 0.601           | -(1234)             | 0.109(3090)          | -0.043        | 0.082        |
| PGC_SCZ wave2 only                                 | 1        | 0.96        | 7.35e-09        | 0.17(34850)         | 0.182(44347)         | -0.086        | 0.015        |
| PGC_SCZ wave3 (excl. wave2)                        | 0        | 0.85        | 0.00435         | 0.221(39926)        | 0.207(56676)         | -0.045        | 0.016        |
| <b>PGC_SCZ wave3 (incl. wave2)</b>                 | <b>1</b> | <b>0.90</b> | <b>7.37e-10</b> | <b>0.196(74776)</b> | <b>0.195(101023)</b> | <b>-0.066</b> | <b>0.011</b> |
| Decode – Replication                               | -        | 1.00        | 0.0886          | 0.17(1979)          | 0.186(142627)        | -0.086        | 0.051        |
| <b>PGC_SCZ wave3 (incl. wave2 and replication)</b> | <b>1</b> | <b>0.95</b> | <b>2.03e-10</b> | <b>0.195(76755)</b> | <b>0.19(243650)</b>  | <b>-0.067</b> | <b>0.011</b> |

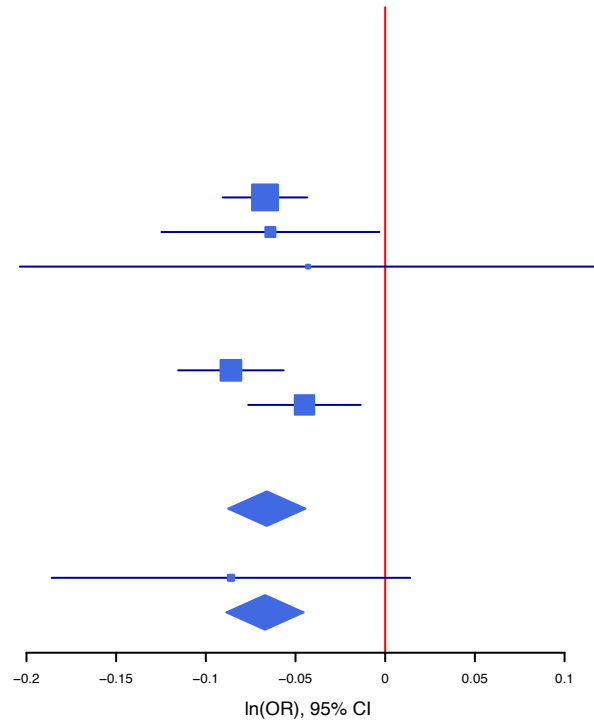

| rs59498392                                         | C/G      |             | 8:38260433      |                     | het_P:               | 0.984        | het_I:       | 0.0 |
|----------------------------------------------------|----------|-------------|-----------------|---------------------|----------------------|--------------|--------------|-----|
|                                                    | ngt      | info        | p_value         | f_ca(n)             |                      |              |              |     |
| PGC_SCZ wave3 eur only                             | 0        | 1.00        | 5.85e-08        | 0.793(53386)        | 0.782(77258)         | 0.057        | 0.011        |     |
| PGC_SCZ wave3 asn only                             | 0        | 0.98        | 0.00209         | 0.705(14004)        | 0.69(16757)          | 0.057        | 0.019        |     |
| PGC_SCZ afram only                                 | -        | 0.95        | 0.139           | -(6152)             | 0.857(3918)          | 0.063        | 0.043        |     |
| PGC_SCZ latino only                                | -        | 0.99        | 0.412           | -(1234)             | 0.782(3090)          | 0.05         | 0.061        |     |
| PGC_SCZ wave2 only                                 | 0        | 1.00        | 1.75e-06        | 0.79(34850)         | 0.783(44347)         | 0.063        | 0.013        |     |
| PGC_SCZ wave3 (excl. wave2)                        | 0        | 0.98        | 1.15e-05        | 0.783(39926)        | 0.771(56676)         | 0.052        | 0.012        |     |
| <b>PGC_SCZ wave3 (incl. wave2)</b>                 | <b>0</b> | <b>0.99</b> | <b>1.1e-10</b>  | <b>0.786(74776)</b> | <b>0.775(101023)</b> | <b>0.057</b> | <b>0.009</b> |     |
| Decode – Replication                               | -        | 1.00        | 0.886           | 0.79(1979)          | 0.763(142627)        | 0.006        | 0.045        |     |
| <b>PGC_SCZ wave3 (incl. wave2 and replication)</b> | <b>0</b> | <b>0.99</b> | <b>2.08e-10</b> | <b>0.786(76755)</b> | <b>0.768(243650)</b> | <b>0.056</b> | <b>0.009</b> |     |

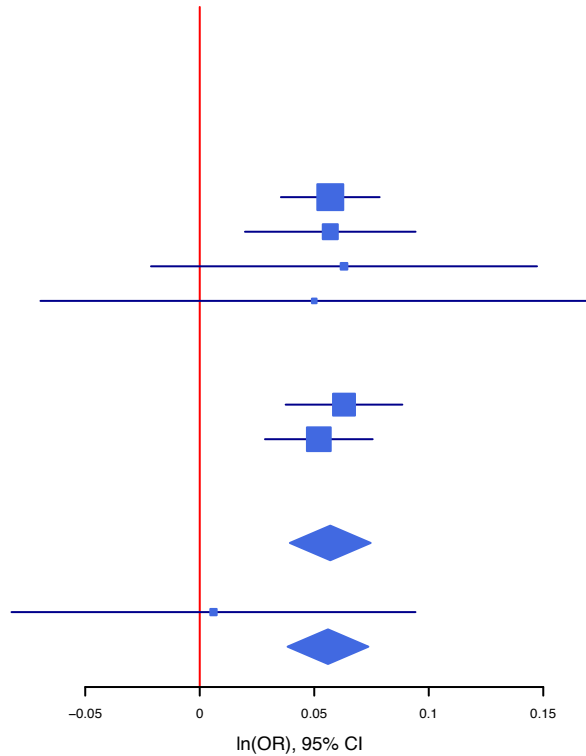

rs12190758                    A/G                    6:93148341  
 ---                    het\_P:                    0.631    het\_I:                    0.0

|                                                    | ngt      | info        | p_value         | f_ca(n)             | f_co(n)              | ln(OR)        | STDerr       |
|----------------------------------------------------|----------|-------------|-----------------|---------------------|----------------------|---------------|--------------|
| PGC_SCZ wave3 eur only                             | 0        | 0.99        | 1.78e-10        | 0.737(53386)        | 0.748(77258)         | -0.063        | 0.01         |
| PGC_SCZ wave3 asn only                             | 0        | 0.80        | 0.193           | 0.972(14004)        | 0.974(16757)         | -0.077        | 0.059        |
| PGC_SCZ afram only                                 | -        | 0.96        | 0.313           | -(6152)             | 0.844(3918)          | -0.042        | 0.041        |
| PGC_SCZ latino only                                | -        | 0.98        | 0.965           | -(1234)             | 0.866(3090)          | -0.003        | 0.072        |
| PGC_SCZ wave2 only                                 | 0        | 0.99        | 2.18e-07        | 0.75(34850)         | 0.753(44347)         | -0.066        | 0.013        |
| PGC_SCZ wave3 (excl. wave2)                        | 0        | 0.94        | 6.94e-05        | 0.837(39926)        | 0.831(56676)         | -0.056        | 0.014        |
| <b>PGC_SCZ wave3 (incl. wave2)</b>                 | <b>0</b> | <b>0.96</b> | <b>6.01e-11</b> | <b>0.803(74776)</b> | <b>0.801(101023)</b> | <b>-0.061</b> | <b>0.009</b> |
| Decode – Replication                               | -        | 1.00        | 0.884           | 0.76(1979)          | 0.75(142627)         | 0.006         | 0.044        |
| <b>PGC_SCZ wave3 (incl. wave2 and replication)</b> | <b>0</b> | <b>0.98</b> | <b>2.17e-10</b> | <b>0.802(76755)</b> | <b>0.773(243650)</b> | <b>-0.058</b> | <b>0.009</b> |

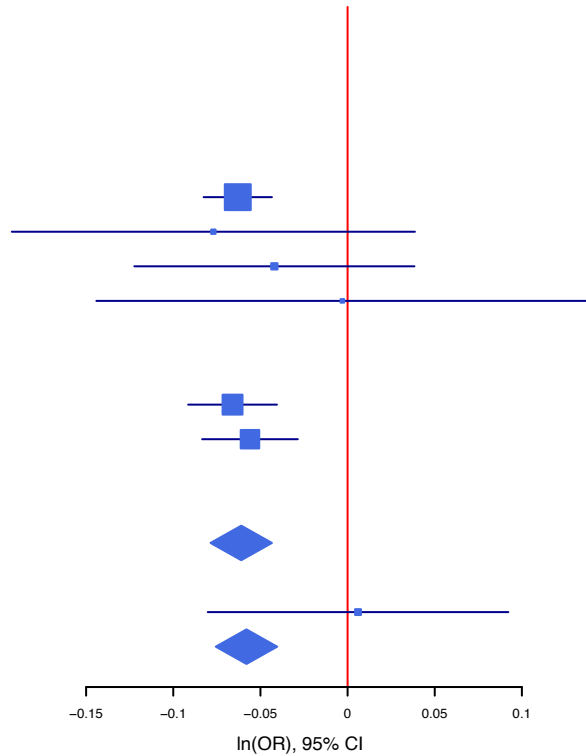

| rs6538539                                          | G/T       |             | 12:95195293     |                     | het_P:               | 0.205        | het_I:       | 36.9 |
|----------------------------------------------------|-----------|-------------|-----------------|---------------------|----------------------|--------------|--------------|------|
|                                                    | ngt       | info        | p_value         | f_ca(n)             |                      |              |              |      |
| PGC_SCZ wave3 eur only                             | 19        | 1.00        | 4.43e-11        | 0.462(53386)        | 0.451(77258)         | 0.057        | 0.009        |      |
| PGC_SCZ wave3 asn only                             | 7         | 0.99        | 0.482           | 0.548(14004)        | 0.544(16757)         | 0.012        | 0.017        |      |
| PGC_SCZ afram only                                 | -         | 0.99        | 0.204           | -(6152)             | 0.473(3918)          | 0.037        | 0.029        |      |
| PGC_SCZ latino only                                | -         | 1.00        | 0.411           | -(1234)             | 0.463(3090)          | -0.041       | 0.05         |      |
| PGC_SCZ wave2 only                                 | 20        | 1.00        | 6.55e-05        | 0.466(34850)        | 0.456(44347)         | 0.043        | 0.011        |      |
| PGC_SCZ wave3 (excl. wave2)                        | 6         | 1.00        | 3.22e-06        | 0.485(39926)        | 0.475(56676)         | 0.047        | 0.01         |      |
| <b>PGC_SCZ wave3 (incl. wave2)</b>                 | <b>26</b> | <b>1.00</b> | <b>9.13e-10</b> | <b>0.477(74776)</b> | <b>0.468(101023)</b> | <b>0.045</b> | <b>0.007</b> |      |
| Decode – Replication                               | -         | 1.00        | 0.08            | 0.435(1979)         | 0.46(142627)         | 0.066        | 0.038        |      |
| <b>PGC_SCZ wave3 (incl. wave2 and replication)</b> | <b>26</b> | <b>1.00</b> | <b>2.66e-10</b> | <b>0.476(76755)</b> | <b>0.463(243650)</b> | <b>0.046</b> | <b>0.007</b> |      |

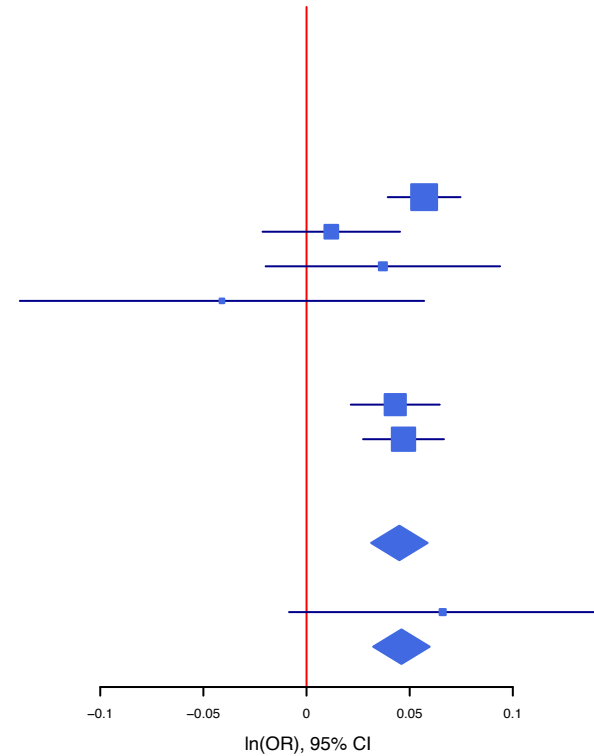

rs1454606 C/T 4:33642614  
 +--+ het\_P: 0.062 het\_I: 64.0

|                                                    | ngt       | info        | p_value        | f_ca(n)             | f_co(n)              | ln(OR)        | STDerr      |
|----------------------------------------------------|-----------|-------------|----------------|---------------------|----------------------|---------------|-------------|
| PGC_SCZ wave3 eur only                             | 59        | 0.94        | 3.46e-06       | 0.867(53386)        | 0.875(77258)         | -0.061        | 0.013       |
| PGC_SCZ wave3 asn only                             | 8         | 0.93        | 7.19e-07       | 0.65(14004)         | 0.668(16757)         | -0.092        | 0.019       |
| PGC_SCZ afram only                                 | -         | 0.88        | 0.758          | -(6152)             | 0.315(3918)          | 0.011         | 0.035       |
| PGC_SCZ latino only                                | -         | 0.94        | 0.675          | -(1234)             | 0.75(3090)           | -0.025        | 0.059       |
| PGC_SCZ wave2 only                                 | 36        | 0.95        | 0.00043        | 0.859(34850)        | 0.872(44347)         | -0.058        | 0.016       |
| PGC_SCZ wave3 (excl. wave2)                        | 31        | 0.92        | 2.33e-07       | 0.683(39926)        | 0.725(56676)         | -0.067        | 0.013       |
| <b>PGC_SCZ wave3 (incl. wave2)</b>                 | <b>67</b> | <b>0.93</b> | <b>5e-10</b>   | <b>0.752(74776)</b> | <b>0.781(101023)</b> | <b>-0.063</b> | <b>0.01</b> |
| Decode – Replication                               | -         | 1.00        | 0.221          | 0.85(1979)          | 0.859(142627)        | -0.063        | 0.051       |
| <b>PGC_SCZ wave3 (incl. wave2 and replication)</b> | <b>67</b> | <b>0.97</b> | <b>2.7e-10</b> | <b>0.754(76755)</b> | <b>0.824(243650)</b> | <b>-0.063</b> | <b>0.01</b> |

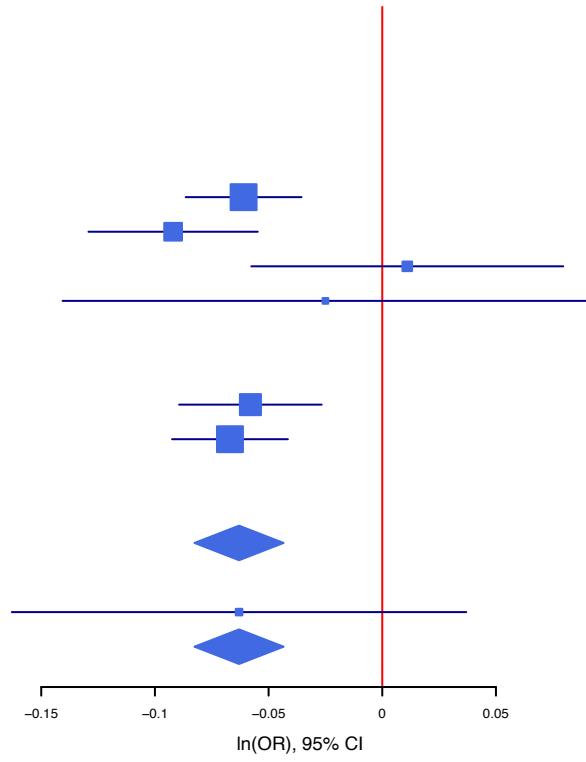

**rs11076631**                      **A/G**                      **16:89877975**  
 ++-                      het\_P:                      0.488    het\_I:                      0.0

|                                                    | ngt      | info        | p_value         | f_ca(n)             | f_co(n)              | ln(OR)       | STDerr       |
|----------------------------------------------------|----------|-------------|-----------------|---------------------|----------------------|--------------|--------------|
| PGC_SCZ wave3 eur only                             | 1        | 0.99        | 1.06e-08        | 0.623(53386)        | 0.611(77258)         | 0.051        | 0.009        |
| PGC_SCZ wave3 asn only                             | 3        | 0.82        | 0.0688          | 0.051(14004)        | 0.043(16757)         | 0.088        | 0.048        |
| PGC_SCZ afram only                                 | -        | 0.94        | 0.0846          | -(6152)             | 0.502(3918)          | 0.052        | 0.03         |
| PGC_SCZ latino only                                | -        | 1.02        | 0.848           | -(1234)             | 0.39(3090)           | -0.01        | 0.051        |
| PGC_SCZ wave2 only                                 | 2        | 0.99        | 1.69e-06        | 0.59(34850)         | 0.597(44347)         | 0.055        | 0.011        |
| PGC_SCZ wave3 (excl. wave2)                        | 2        | 0.95        | 0.000148        | 0.425(39926)        | 0.436(56676)         | 0.046        | 0.012        |
| <b>PGC_SCZ wave3 (incl. wave2)</b>                 | <b>4</b> | <b>0.97</b> | <b>1.33e-09</b> | <b>0.49(74776)</b>  | <b>0.498(101023)</b> | <b>0.051</b> | <b>0.008</b> |
| Decode – Replication                               | -        | 1.00        | 0.0893          | 0.632(1979)         | 0.613(142627)        | 0.067        | 0.04         |
| <b>PGC_SCZ wave3 (incl. wave2 and replication)</b> | <b>4</b> | <b>0.98</b> | <b>2.9e-10</b>  | <b>0.493(76755)</b> | <b>0.561(243650)</b> | <b>0.051</b> | <b>0.008</b> |

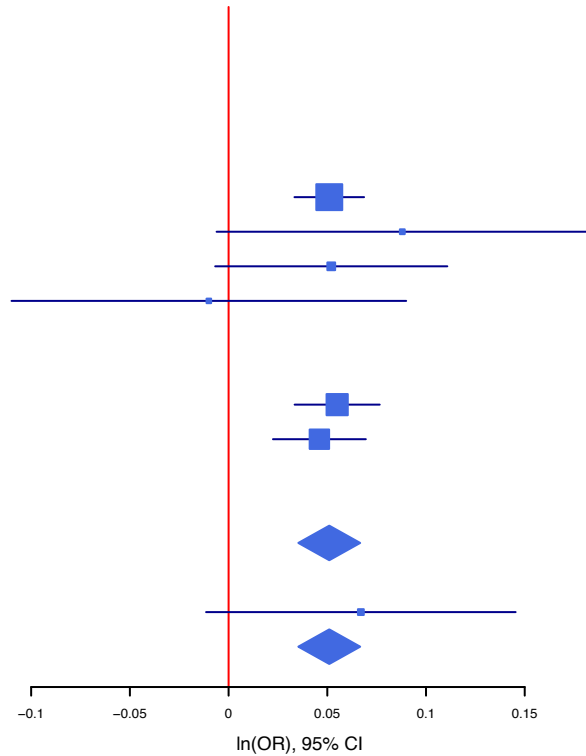

| rs708228                                           | C/T       |             | 11:57585662     |                     |                      |               |              |
|----------------------------------------------------|-----------|-------------|-----------------|---------------------|----------------------|---------------|--------------|
|                                                    | ++        |             | het_P:          | 0.402               | het_I:               | 0.0           |              |
|                                                    | ngt       | info        | p_value         | f_ca(n)             | f_co(n)              | ln(OR)        | STDerr       |
| PGC_SCZ wave3 eur only                             | 31        | 1.00        | 6.56e-09        | 0.661(53386)        | 0.671(77258)         | -0.053        | 0.009        |
| PGC_SCZ wave3 asn only                             | 5         | 0.97        | 0.112           | 0.853(14004)        | 0.863(16757)         | -0.039        | 0.025        |
| PGC_SCZ afram only                                 | -         | 1.00        | 0.845           | -(6152)             | 0.882(3918)          | 0.009         | 0.046        |
| PGC_SCZ latino only                                | -         | 1.02        | 0.717           | -(1234)             | 0.828(3090)          | -0.023        | 0.065        |
| PGC_SCZ wave2 only                                 | 28        | 1.01        | 1.13e-05        | 0.667(34850)        | 0.673(44347)         | -0.05         | 0.012        |
| PGC_SCZ wave3 (excl. wave2)                        | 8         | 0.99        | 0.000105        | 0.784(39926)        | 0.771(56676)         | -0.047        | 0.012        |
| <b>PGC_SCZ wave3 (incl. wave2)</b>                 | <b>36</b> | <b>1.00</b> | <b>3.99e-09</b> | <b>0.738(74776)</b> | <b>0.734(101023)</b> | <b>-0.049</b> | <b>0.008</b> |
| Decode – Replication                               | -         | 1.00        | 0.00797         | 0.71(1979)          | 0.687(142627)        | -0.107        | 0.04         |
| <b>PGC_SCZ wave3 (incl. wave2 and replication)</b> | <b>36</b> | <b>1.00</b> | <b>3.1e-10</b>  | <b>0.737(76755)</b> | <b>0.708(243650)</b> | <b>-0.051</b> | <b>0.008</b> |

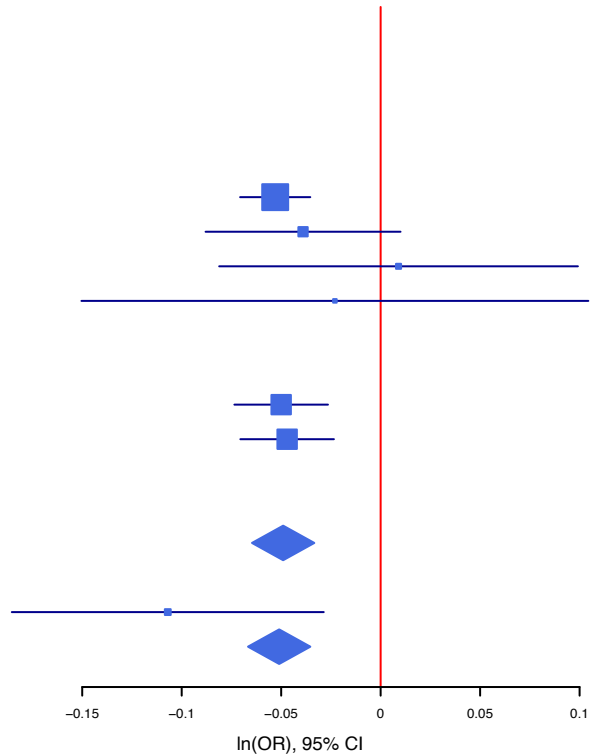

rs61952922                    A/G                    12:122520575  
 ---                    het\_P:                    0.995    het\_I:                    0.0

|                                                    | ngt      | info        | p_value         | f_ca(n)             | f_co(n)              | ln(OR)        | STDerr       |
|----------------------------------------------------|----------|-------------|-----------------|---------------------|----------------------|---------------|--------------|
| PGC_SCZ wave3 eur only                             | 0        | 0.97        | 1.14e-05        | 0.512(53386)        | 0.522(77258)         | -0.038        | 0.009        |
| PGC_SCZ wave3 asn only                             | 0        | 0.93        | 0.000485        | 0.465(14004)        | 0.479(16757)         | -0.061        | 0.018        |
| PGC_SCZ afram only                                 | -        | 0.92        | 0.177           | -(6152)             | 0.47(3918)           | -0.041        | 0.03         |
| PGC_SCZ latino only                                | -        | 0.97        | 0.358           | -(1234)             | 0.572(3090)          | -0.047        | 0.051        |
| PGC_SCZ wave2 only                                 | 0        | 0.97        | 3.24e-05        | 0.511(34850)        | 0.524(44347)         | -0.046        | 0.011        |
| PGC_SCZ wave3 (excl. wave2)                        | 0        | 0.95        | 7.95e-05        | 0.504(39926)        | 0.51(56676)          | -0.04         | 0.01         |
| <b>PGC_SCZ wave3 (incl. wave2)</b>                 | <b>0</b> | <b>0.96</b> | <b>9.7e-09</b>  | <b>0.507(74776)</b> | <b>0.515(101023)</b> | <b>-0.043</b> | <b>0.008</b> |
| Decode – Replication                               | -        | 1.00        | 0.00045         | 0.54(1979)          | 0.555(142627)        | -0.133        | 0.038        |
| <b>PGC_SCZ wave3 (incl. wave2 and replication)</b> | <b>0</b> | <b>0.98</b> | <b>3.13e-10</b> | <b>0.508(76755)</b> | <b>0.537(243650)</b> | <b>-0.046</b> | <b>0.007</b> |

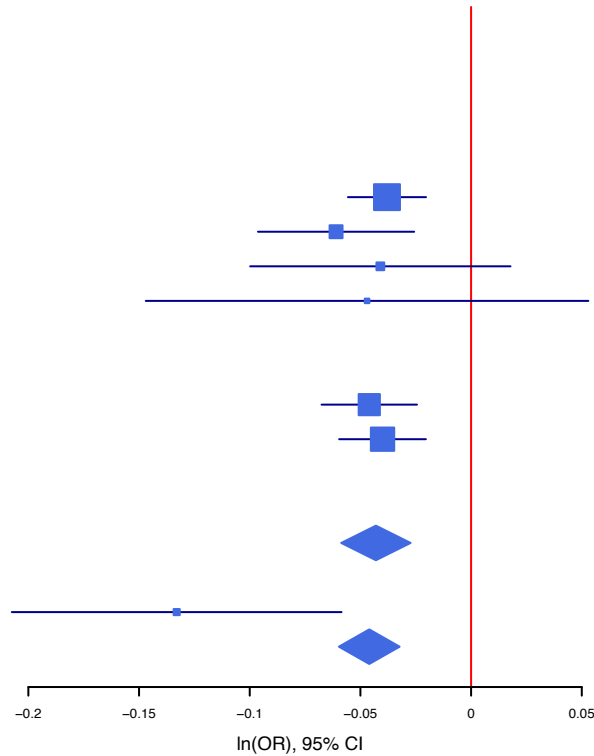



| rs75329315                                         | T/G      |             | 17:1245442      |                     | het_P:               | 0.058        | het_I:       | 65.0 |
|----------------------------------------------------|----------|-------------|-----------------|---------------------|----------------------|--------------|--------------|------|
|                                                    | ++       | +-          | TT              | GG                  |                      |              |              |      |
|                                                    | ngt      | info        | p_value         | f_ca(n)             | f_co(n)              | ln(OR)       | STDerr       |      |
| PGC_SCZ wave3 eur only                             | 0        | 0.98        | 6.94e-05        | 0.926(53386)        | 0.921(77258)         | 0.065        | 0.016        |      |
| PGC_SCZ wave3 asn only                             | 0        | 0.96        | 4.52e-05        | 0.86(14004)         | 0.848(16757)         | 0.1          | 0.025        |      |
| PGC_SCZ afram only                                 | -        | 0.85        | 0.794           | -(6152)             | 0.959(3918)          | -0.021       | 0.08         |      |
| PGC_SCZ latino only                                | -        | 1.03        | 0.00054         | -(1234)             | 0.679(3090)          | 0.19         | 0.055        |      |
| PGC_SCZ wave2 only                                 | 0        | 0.98        | 0.00219         | 0.924(34850)        | 0.92(44347)          | 0.063        | 0.02         |      |
| PGC_SCZ wave3 (excl. wave2)                        | 0        | 0.97        | 6.74e-08        | 0.868(39926)        | 0.873(56676)         | 0.091        | 0.017        |      |
| <b>PGC_SCZ wave3 (incl. wave2)</b>                 | <b>0</b> | <b>0.97</b> | <b>9.38e-10</b> | <b>0.89(74776)</b>  | <b>0.891(101023)</b> | <b>0.08</b>  | <b>0.013</b> |      |
| Decode – Replication                               | -        | 1.00        | 0.152           | 0.921(1979)         | 0.922(142627)        | 0.106        | 0.074        |      |
| <b>PGC_SCZ wave3 (incl. wave2 and replication)</b> | <b>0</b> | <b>0.99</b> | <b>3.26e-10</b> | <b>0.891(76755)</b> | <b>0.908(243650)</b> | <b>0.081</b> | <b>0.013</b> |      |

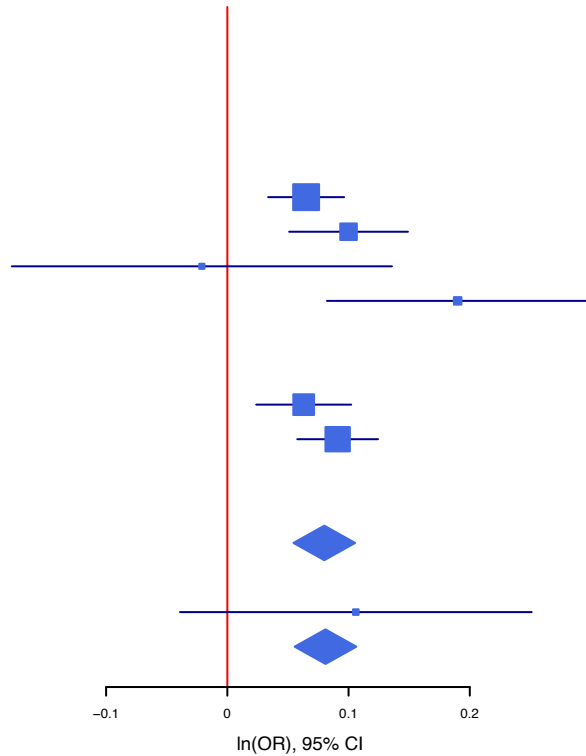

| rs77622099                                         | G/A       |             | 2:58217344      |                     | 0.858                | het_I:        | 0.0          |
|----------------------------------------------------|-----------|-------------|-----------------|---------------------|----------------------|---------------|--------------|
|                                                    | +++       | het_P:      |                 |                     |                      |               |              |
|                                                    | ngt       | info        | p_value         | f_ca(n)             | f_co(n)              | ln(OR)        | STDerr       |
| PGC_SCZ wave3 eur only                             | 29        | 0.98        | 1.43e-08        | 0.905(53386)        | 0.913(77258)         | -0.085        | 0.015        |
| PGC_SCZ wave3 asn only                             | 3         | 0.99        | 0.0219          | 0.971(14004)        | 0.975(16757)         | -0.125        | 0.055        |
| PGC_SCZ afram only                                 | -         | 0.97        | 0.402           | -(6152)             | 0.95(3918)           | -0.057        | 0.069        |
| PGC_SCZ latino only                                | -         | 0.98        | 0.261           | -(1234)             | 0.949(3090)          | -0.124        | 0.11         |
| PGC_SCZ wave2 only                                 | 0         | 0.98        | 2.22e-06        | 0.908(34850)        | 0.914(44347)         | -0.091        | 0.019        |
| PGC_SCZ wave3 (excl. wave2)                        | 32        | 0.98        | 5.53e-05        | 0.937(39926)        | 0.937(56676)         | -0.083        | 0.021        |
| <b>PGC_SCZ wave3 (incl. wave2)</b>                 | <b>32</b> | <b>0.98</b> | <b>5.05e-10</b> | <b>0.926(74776)</b> | <b>0.928(101023)</b> | <b>-0.087</b> | <b>0.014</b> |
| Decode – Replication                               | -         | 1.00        | 0.308           | 0.926(1979)         | 0.92(142627)         | -0.073        | 0.072        |
| <b>PGC_SCZ wave3 (incl. wave2 and replication)</b> | <b>32</b> | <b>0.99</b> | <b>3.26e-10</b> | <b>0.926(76755)</b> | <b>0.923(243650)</b> | <b>-0.087</b> | <b>0.014</b> |

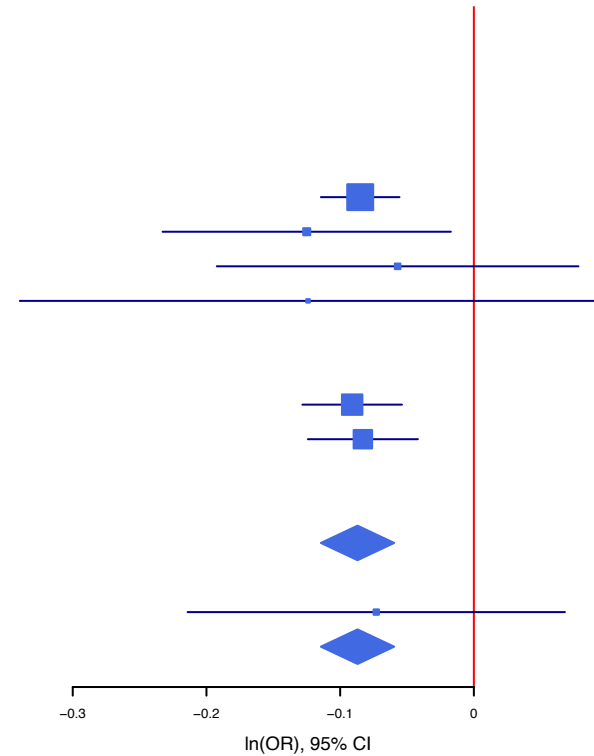

| rs1924378                                          | T/G       |             | 13:38361744     |                     | het_P:               | 0.868        | het_I:       | 0.0 |
|----------------------------------------------------|-----------|-------------|-----------------|---------------------|----------------------|--------------|--------------|-----|
|                                                    | ngt       | info        | p_value         | f_ca(n)             |                      |              |              |     |
| PGC_SCZ wave3 eur only                             | 21        | 0.96        | 1.09e-07        | 0.434(53386)        | 0.424(77258)         | 0.047        | 0.009        |     |
| PGC_SCZ wave3 asn only                             | 4         | 0.86        | 0.0287          | 0.716(14004)        | 0.717(16757)         | 0.045        | 0.021        |     |
| PGC_SCZ afram only                                 | -         | 0.96        | 0.0383          | -(6152)             | 0.488(3918)          | 0.062        | 0.03         |     |
| PGC_SCZ latino only                                | -         | 1.00        | 0.473           | -(1234)             | 0.584(3090)          | 0.036        | 0.051        |     |
| PGC_SCZ wave2 only                                 | 21        | 0.98        | 0.0129          | 0.45(34850)         | 0.434(44347)         | 0.027        | 0.011        |     |
| PGC_SCZ wave3 (excl. wave2)                        | 4         | 0.93        | 8.3e-10         | 0.537(39926)        | 0.521(56676)         | 0.067        | 0.011        |     |
| <b>PGC_SCZ wave3 (incl. wave2)</b>                 | <b>25</b> | <b>0.95</b> | <b>8.02e-10</b> | <b>0.502(74776)</b> | <b>0.487(101023)</b> | <b>0.048</b> | <b>0.008</b> |     |
| Decode – Replication                               | -         | 1.00        | 0.234           | 0.438(1979)         | 0.431(142627)        | 0.046        | 0.038        |     |
| <b>PGC_SCZ wave3 (incl. wave2 and replication)</b> | <b>25</b> | <b>0.98</b> | <b>3.33e-10</b> | <b>0.501(76755)</b> | <b>0.456(243650)</b> | <b>0.047</b> | <b>0.008</b> |     |

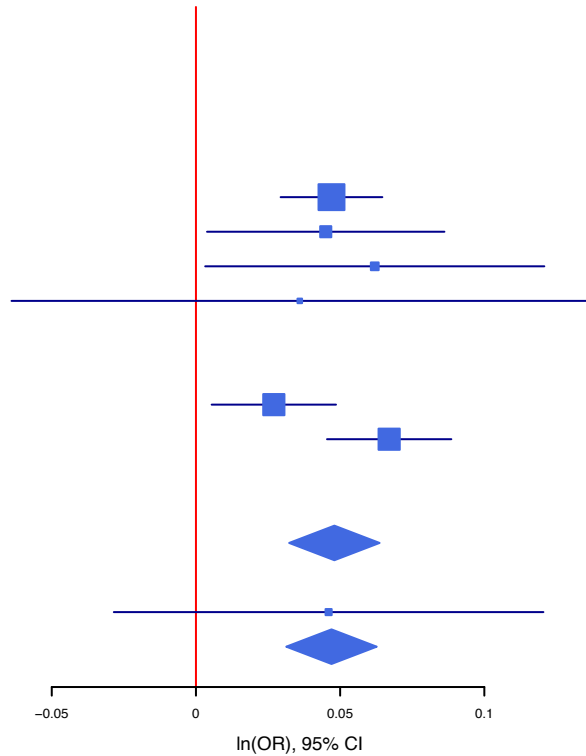

|                                                    | A/G      |             | 8:60698795      |                     | het_P:               | 0.467        | het_I:       | 0.0 |
|----------------------------------------------------|----------|-------------|-----------------|---------------------|----------------------|--------------|--------------|-----|
|                                                    | ngt      | info        | p_value         | f_ca(n)             |                      |              |              |     |
| PGC_SCZ wave3 eur only                             | 0        | 1.00        | 4.12e-10        | 0.414(53386)        | 0.401(77258)         | 0.055        | 0.009        |     |
| PGC_SCZ wave3 asn only                             | 0        | 0.99        | 0.0106          | 0.399(14004)        | 0.39(16757)          | 0.044        | 0.017        |     |
| PGC_SCZ afram only                                 | -        | 0.99        | 0.614           | -(6152)             | 0.188(3918)          | 0.019        | 0.038        |     |
| PGC_SCZ latino only                                | -        | 1.01        | 0.986           | -(1234)             | 0.222(3090)          | -0.001       | 0.06         |     |
| PGC_SCZ wave2 only                                 | 0        | 1.00        | 1.06e-08        | 0.412(34850)        | 0.4(44347)           | 0.063        | 0.011        |     |
| PGC_SCZ wave3 (excl. wave2)                        | 0        | 1.00        | 0.0002          | 0.328(39926)        | 0.34(56676)          | 0.039        | 0.01         |     |
| <b>PGC_SCZ wave3 (incl. wave2)</b>                 | <b>0</b> | <b>1.00</b> | <b>2.71e-11</b> | <b>0.361(74776)</b> | <b>0.363(101023)</b> | <b>0.051</b> | <b>0.008</b> |     |
| Decode – Replication                               | -        | 1.00        | 0.225           | 0.405(1979)         | 0.397(142627)        | -0.046       | 0.038        |     |
| <b>PGC_SCZ wave3 (incl. wave2 and replication)</b> | <b>0</b> | <b>1.00</b> | <b>3.46e-10</b> | <b>0.362(76755)</b> | <b>0.382(243650)</b> | <b>0.047</b> | <b>0.008</b> |     |

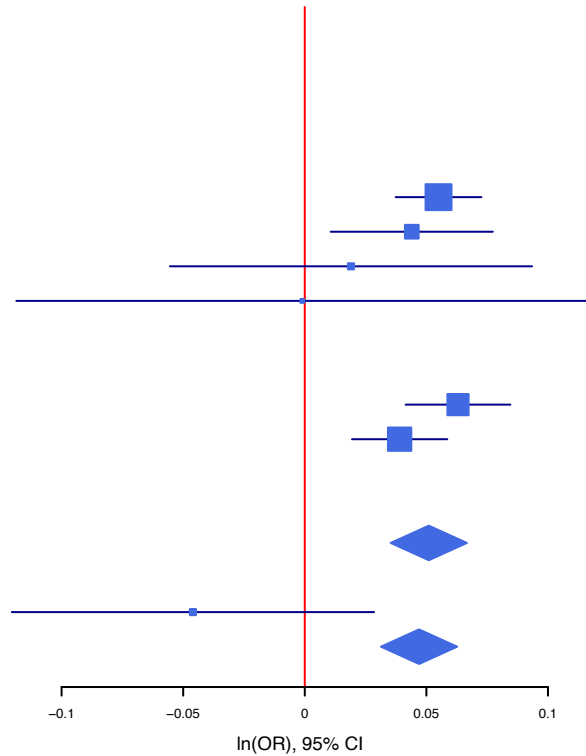

rs2387414                    G/C                    19:51034243  
 +++                    het\_P:                    0.409    het\_I:                    0.0

|                                                    | ngt      | info        | p_value         | f_ca(n)             | f_co(n)              | ln(OR)        | STDerr       |
|----------------------------------------------------|----------|-------------|-----------------|---------------------|----------------------|---------------|--------------|
| PGC_SCZ wave3 eur only                             | 0        | 0.94        | 7.08e-07        | 0.364(53386)        | 0.375(77258)         | -0.045        | 0.009        |
| PGC_SCZ wave3 asn only                             | 0        | 0.88        | 7.45e-05        | 0.718(14004)        | 0.735(16757)         | -0.081        | 0.02         |
| PGC_SCZ afram only                                 | -        | 0.86        | 0.95            | -(6152)             | 0.261(3918)          | -0.002        | 0.036        |
| PGC_SCZ latino only                                | -        | 0.92        | 0.353           | -(1234)             | 0.446(3090)          | -0.049        | 0.053        |
| PGC_SCZ wave2 only                                 | 0        | 0.95        | 0.000173        | 0.386(34850)        | 0.385(44347)         | -0.043        | 0.012        |
| PGC_SCZ wave3 (excl. wave2)                        | 0        | 0.91        | 1.45e-06        | 0.437(39926)        | 0.447(56676)         | -0.054        | 0.011        |
| <b>PGC_SCZ wave3 (incl. wave2)</b>                 | <b>0</b> | <b>0.93</b> | <b>1.4e-09</b>  | <b>0.418(74776)</b> | <b>0.424(101023)</b> | <b>-0.049</b> | <b>0.008</b> |
| Decode – Replication                               | -        | 1.00        | 0.0802          | 0.375(1979)         | 0.411(142627)        | -0.071        | 0.04         |
| <b>PGC_SCZ wave3 (incl. wave2 and replication)</b> | <b>0</b> | <b>0.96</b> | <b>3.78e-10</b> | <b>0.417(76755)</b> | <b>0.417(243650)</b> | <b>-0.05</b>  | <b>0.008</b> |

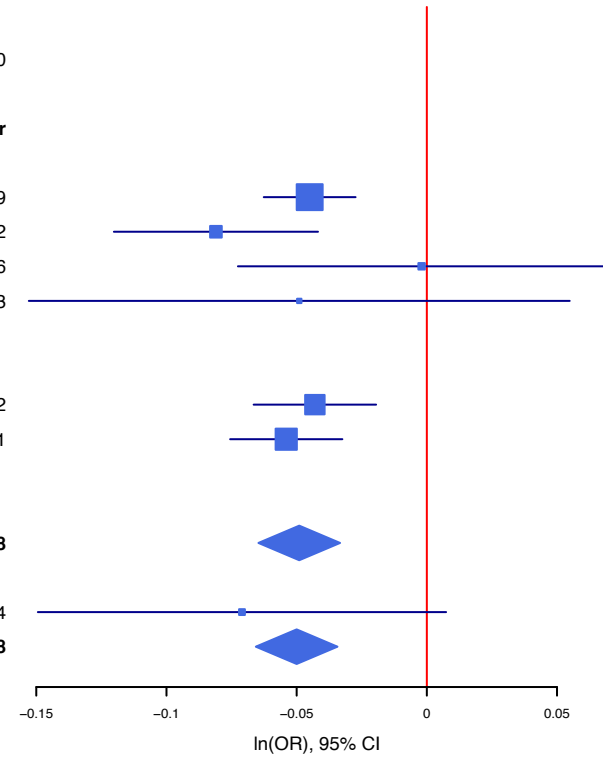

|                                                    | C/G       |             | 1:36373823      |                     | het_P:               | 0.983        | het_I:       | 0.0 |
|----------------------------------------------------|-----------|-------------|-----------------|---------------------|----------------------|--------------|--------------|-----|
|                                                    | ngt       | info        | p_value         | f_ca(n)             |                      |              |              |     |
| PGC_SCZ wave3 eur only                             | 16        | 0.99        | 1.38e-06        | 0.923(53386)        | 0.919(77258)         | 0.078        | 0.016        |     |
| PGC_SCZ wave3 asn only                             | 4         | 0.91        | 0.000603        | 0.389(14004)        | 0.368(16757)         | 0.065        | 0.019        |     |
| PGC_SCZ afram only                                 | -         | 0.99        | 0.102           | -(6152)             | 0.867(3918)          | 0.07         | 0.043        |     |
| PGC_SCZ latino only                                | -         | 1.01        | 0.245           | -(1234)             | 0.639(3090)          | 0.063        | 0.054        |     |
| PGC_SCZ wave2 only                                 | 16        | 0.99        | 0.000181        | 0.892(34850)        | 0.907(44347)         | 0.074        | 0.02         |     |
| PGC_SCZ wave3 (excl. wave2)                        | 4         | 0.98        | 6.31e-07        | 0.736(39926)        | 0.747(56676)         | 0.071        | 0.014        |     |
| <b>PGC_SCZ wave3 (incl. wave2)</b>                 | <b>20</b> | <b>0.98</b> | <b>4.61e-10</b> | <b>0.798(74776)</b> | <b>0.808(101023)</b> | <b>0.072</b> | <b>0.012</b> |     |
| Decode – Replication                               | -         | 1.00        | 0.603           | 0.903(1979)         | 0.914(142627)        | 0.035        | 0.067        |     |
| <b>PGC_SCZ wave3 (incl. wave2 and replication)</b> | <b>20</b> | <b>0.99</b> | <b>3.88e-10</b> | <b>0.8(76755)</b>   | <b>0.867(243650)</b> | <b>0.071</b> | <b>0.011</b> |     |

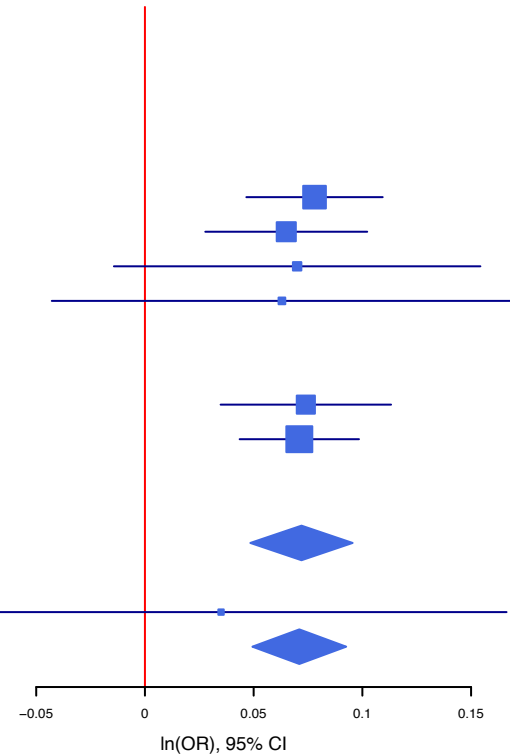

rs10086619

A/G

8:111580570

--+

het\_P:

0.092

het\_I:

58.1

|  | ngt | info | p_value | f_ca(n) | f_co(n) | ln(OR) | STDerr |
|--|-----|------|---------|---------|---------|--------|--------|
|--|-----|------|---------|---------|---------|--------|--------|

PGC\_SCZ wave3 eur only

|    |      |          |              |              |        |       |
|----|------|----------|--------------|--------------|--------|-------|
| 12 | 1.00 | 4.97e-10 | 0.831(53386) | 0.839(77258) | -0.072 | 0.012 |
|----|------|----------|--------------|--------------|--------|-------|

PGC\_SCZ wave3 asn only

|   |      |        |              |              |        |       |
|---|------|--------|--------------|--------------|--------|-------|
| 4 | 1.00 | 0.0174 | 0.845(14004) | 0.851(16757) | -0.056 | 0.024 |
|---|------|--------|--------------|--------------|--------|-------|

PGC\_SCZ afram only

|   |      |       |         |             |        |       |
|---|------|-------|---------|-------------|--------|-------|
| - | 0.95 | 0.731 | -(6152) | 0.647(3918) | -0.011 | 0.031 |
|---|------|-------|---------|-------------|--------|-------|

PGC\_SCZ latino only

|   |      |      |         |             |       |       |
|---|------|------|---------|-------------|-------|-------|
| - | 0.98 | 0.66 | -(1234) | 0.868(3090) | 0.032 | 0.074 |
|---|------|------|---------|-------------|-------|-------|

PGC\_SCZ wave2 only

|    |      |          |              |              |        |       |
|----|------|----------|--------------|--------------|--------|-------|
| 12 | 1.00 | 5.41e-10 | 0.832(34850) | 0.844(44347) | -0.091 | 0.015 |
|----|------|----------|--------------|--------------|--------|-------|

PGC\_SCZ wave3 (excl. wave2)

|   |      |         |              |              |        |       |
|---|------|---------|--------------|--------------|--------|-------|
| 4 | 0.99 | 0.00396 | 0.805(39926) | 0.814(56676) | -0.038 | 0.013 |
|---|------|---------|--------------|--------------|--------|-------|

**PGC\_SCZ wave3 (incl. wave2)**

|           |             |                 |                     |                      |               |             |
|-----------|-------------|-----------------|---------------------|----------------------|---------------|-------------|
| <b>16</b> | <b>0.99</b> | <b>2.97e-10</b> | <b>0.816(74776)</b> | <b>0.826(101023)</b> | <b>-0.062</b> | <b>0.01</b> |
|-----------|-------------|-----------------|---------------------|----------------------|---------------|-------------|

Decode - Replication

|   |      |       |             |               |        |      |
|---|------|-------|-------------|---------------|--------|------|
| - | 1.00 | 0.655 | 0.869(1979) | 0.862(142627) | -0.023 | 0.05 |
|---|------|-------|-------------|---------------|--------|------|

**PGC\_SCZ wave3 (incl. wave2 and replication)**

|           |             |                 |                     |                      |              |             |
|-----------|-------------|-----------------|---------------------|----------------------|--------------|-------------|
| <b>16</b> | <b>1.00</b> | <b>3.96e-10</b> | <b>0.817(76755)</b> | <b>0.846(243650)</b> | <b>-0.06</b> | <b>0.01</b> |
|-----------|-------------|-----------------|---------------------|----------------------|--------------|-------------|

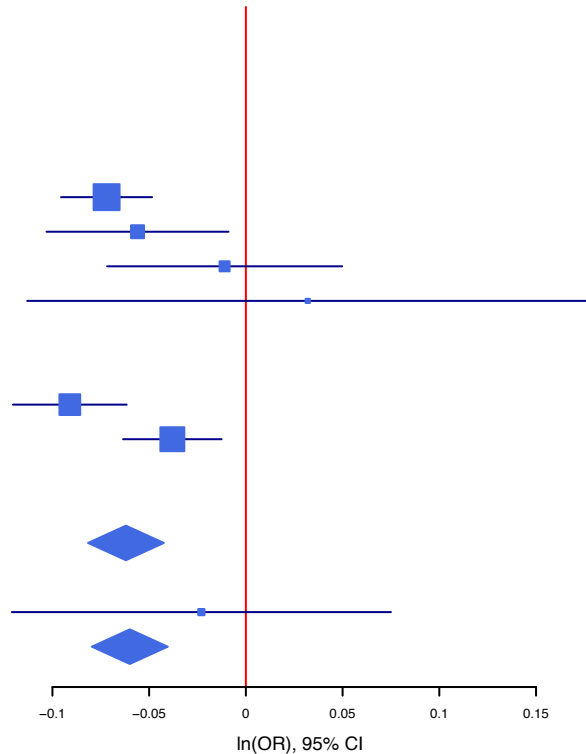

|                                                    | C/T      |             | 1:66324118      |                     | het_P:               | 0.406         | het_I:       | 0.0 |
|----------------------------------------------------|----------|-------------|-----------------|---------------------|----------------------|---------------|--------------|-----|
|                                                    | ngt      | info        | p_value         | f_ca(n)             |                      |               |              |     |
| PGC_SCZ wave3 eur only                             | 0        | 0.99        | 4.71e-08        | 0.427(53386)        | 0.435(77258)         | -0.048        | 0.009        |     |
| PGC_SCZ wave3 asn only                             | 0        | 0.95        | 0.00336         | 0.656(14004)        | 0.669(16757)         | -0.054        | 0.018        |     |
| PGC_SCZ afram only                                 | -        | 0.98        | 0.767           | -(6152)             | 0.509(3918)          | -0.009        | 0.03         |     |
| PGC_SCZ latino only                                | -        | 1.00        | 0.512           | -(1234)             | 0.537(3090)          | -0.033        | 0.05         |     |
| PGC_SCZ wave2 only                                 | 0        | 0.99        | 2.9e-08         | 0.438(34850)        | 0.442(44347)         | -0.061        | 0.011        |     |
| PGC_SCZ wave3 (excl. wave2)                        | 0        | 0.98        | 0.00167         | 0.517(39926)        | 0.512(56676)         | -0.033        | 0.01         |     |
| <b>PGC_SCZ wave3 (incl. wave2)</b>                 | <b>0</b> | <b>0.98</b> | <b>1.17e-09</b> | <b>0.486(74776)</b> | <b>0.485(101023)</b> | <b>-0.046</b> | <b>0.008</b> |     |
| Decode – Replication                               | -        | 1.00        | 0.207           | 0.437(1979)         | 0.42(142627)         | -0.049        | 0.039        |     |
| <b>PGC_SCZ wave3 (incl. wave2 and replication)</b> | <b>0</b> | <b>0.99</b> | <b>4.16e-10</b> | <b>0.485(76755)</b> | <b>0.449(243650)</b> | <b>-0.046</b> | <b>0.007</b> |     |

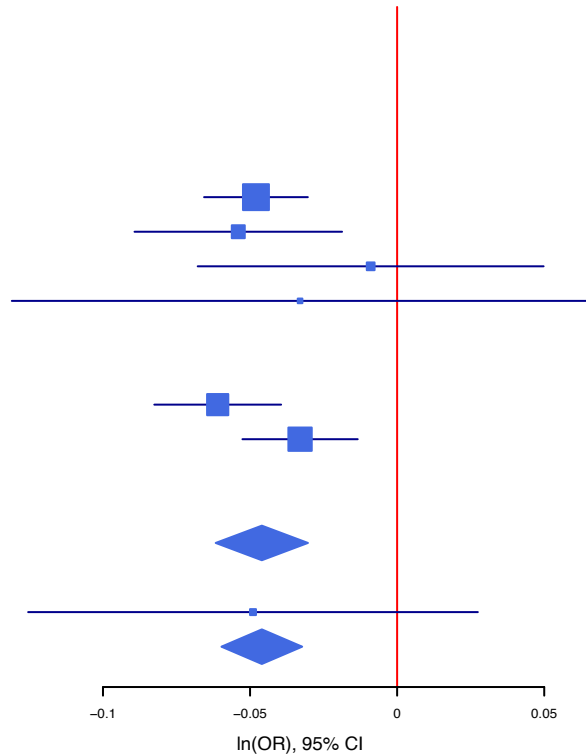



|                                                    | T/C      |             | 14:30017039     |                     | het_P:               | 0.904         | het_I:      | 0.0 |
|----------------------------------------------------|----------|-------------|-----------------|---------------------|----------------------|---------------|-------------|-----|
|                                                    | ngt      | info        | p_value         | f_ca(n)             |                      |               |             |     |
| PGC_SCZ wave3 eur only                             | 1        | 0.98        | 9.97e-10        | 0.778(53386)        | 0.785(77258)         | -0.064        | 0.01        |     |
| PGC_SCZ afram only                                 | -        | 0.95        | 0.381           | -(6152)             | 0.951(3918)          | -0.062        | 0.07        |     |
| PGC_SCZ latino only                                | -        | 0.98        | 0.172           | -(1234)             | 0.857(3090)          | -0.096        | 0.07        |     |
| PGC_SCZ wave2 only                                 | 1        | 0.99        | 2.86e-07        | 0.775(34850)        | 0.784(44347)         | -0.069        | 0.013       |     |
| PGC_SCZ wave3 (excl. wave2)                        | 0        | 0.97        | 0.000176        | 0.848(39926)        | 0.835(56676)         | -0.06         | 0.016       |     |
| <b>PGC_SCZ wave3 (incl. wave2)</b>                 | <b>1</b> | <b>0.98</b> | <b>2.33e-10</b> | <b>0.811(74776)</b> | <b>0.809(101023)</b> | <b>-0.065</b> | <b>0.01</b> |     |
| Decode - Replication                               | -        | 1.00        | 0.725           | 0.799(1979)         | 0.787(142627)        | -0.016        | 0.046       |     |
| <b>PGC_SCZ wave3 (incl. wave2 and replication)</b> | <b>1</b> | <b>0.99</b> | <b>4.25e-10</b> | <b>0.811(76755)</b> | <b>0.797(243650)</b> | <b>-0.063</b> | <b>0.01</b> |     |

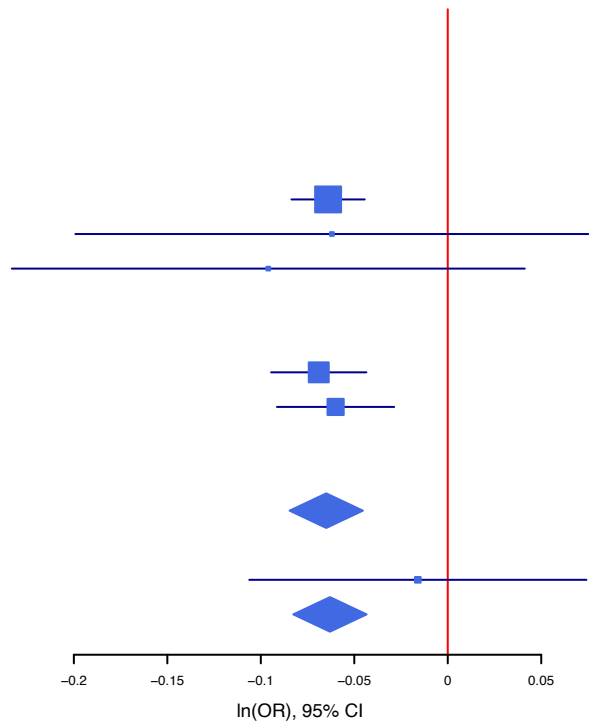

rs115037896

A/G  
+++      5:49545069  
het\_P:      0.389      het\_I:      0.0

|                                                    | ngt      | info        | p_value         | f_ca(n)             | f_co(n)              | ln(OR)       | STDerr       |
|----------------------------------------------------|----------|-------------|-----------------|---------------------|----------------------|--------------|--------------|
| PGC_SCZ wave3 eur only                             | 0        | 0.89        | 1.61e-07        | 0.457(53386)        | 0.445(77258)         | 0.048        | 0.009        |
| PGC_SCZ wave3 asn only                             | 0        | 0.88        | 0.00111         | 0.51(14004)         | 0.496(16757)         | 0.058        | 0.018        |
| PGC_SCZ afram only                                 | -        | 0.55        | 0.797           | -(6152)             | 0.746(3918)          | -0.012       | 0.048        |
| PGC_SCZ latino only                                | -        | 0.77        | 0.172           | -(1234)             | 0.446(3090)          | 0.078        | 0.057        |
| PGC_SCZ wave2 only                                 | 0        | 0.86        | 6.51e-05        | 0.457(34850)        | 0.442(44347)         | 0.047        | 0.012        |
| PGC_SCZ wave3 (excl. wave2)                        | 0        | 0.84        | 2.72e-06        | 0.526(39926)        | 0.504(56676)         | 0.051        | 0.011        |
| <b>PGC_SCZ wave3 (incl. wave2)</b>                 | <b>0</b> | <b>0.85</b> | <b>9.04e-10</b> | <b>0.499(74776)</b> | <b>0.48(101023)</b>  | <b>0.049</b> | <b>0.008</b> |
| Decode – Replication                               | -        | 1.00        | 0.246           | 0.435(1979)         | 0.449(142627)        | 0.044        | 0.038        |
| <b>PGC_SCZ wave3 (incl. wave2 and replication)</b> | <b>0</b> | <b>0.93</b> | <b>4.6e-10</b>  | <b>0.498(76755)</b> | <b>0.463(243650)</b> | <b>0.049</b> | <b>0.008</b> |

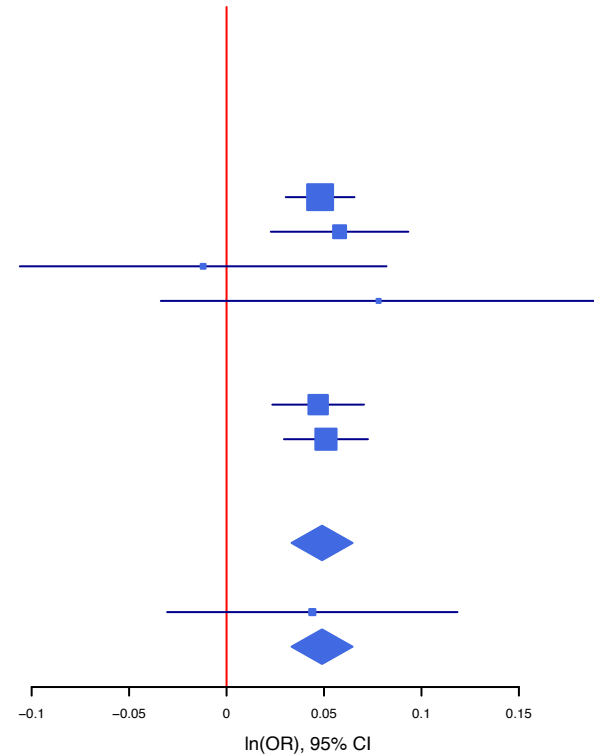

| rs11209828                                         | A/T      |             | 1:72175700      |                     | het_P:               | 0.341        | het_I:       | 7.2 |
|----------------------------------------------------|----------|-------------|-----------------|---------------------|----------------------|--------------|--------------|-----|
|                                                    | ngt      | info        | p_value         | f_ca(n)             |                      |              |              |     |
| PGC_SCZ wave3 eur only                             | 0        | 0.99        | 3.6e-07         | 0.633(53386)        | 0.624(77258)         | 0.045        | 0.009        |     |
| PGC_SCZ wave3 asn only                             | 0        | 0.91        | 0.00266         | 0.421(14004)        | 0.406(16757)         | 0.054        | 0.018        |     |
| PGC_SCZ afram only                                 | -        | 0.95        | 0.368           | -(6152)             | 0.805(3918)          | 0.034        | 0.038        |     |
| PGC_SCZ latino only                                | -        | 0.99        | 0.607           | -(1234)             | 0.492(3090)          | -0.026       | 0.05         |     |
| PGC_SCZ wave2 only                                 | 0        | 0.99        | 6.65e-06        | 0.62(34850)         | 0.617(44347)         | 0.051        | 0.011        |     |
| PGC_SCZ wave3 (excl. wave2)                        | 0        | 0.96        | 0.0002          | 0.592(39926)        | 0.584(56676)         | 0.04         | 0.011        |     |
| <b>PGC_SCZ wave3 (incl. wave2)</b>                 | <b>0</b> | <b>0.97</b> | <b>5.85e-09</b> | <b>0.603(74776)</b> | <b>0.597(101023)</b> | <b>0.045</b> | <b>0.008</b> |     |
| Decode – Replication                               | -        | 1.00        | 0.0106          | 0.616(1979)         | 0.627(142627)        | 0.101        | 0.04         |     |
| <b>PGC_SCZ wave3 (incl. wave2 and replication)</b> | <b>0</b> | <b>0.99</b> | <b>4.81e-10</b> | <b>0.603(76755)</b> | <b>0.614(243650)</b> | <b>0.047</b> | <b>0.008</b> |     |

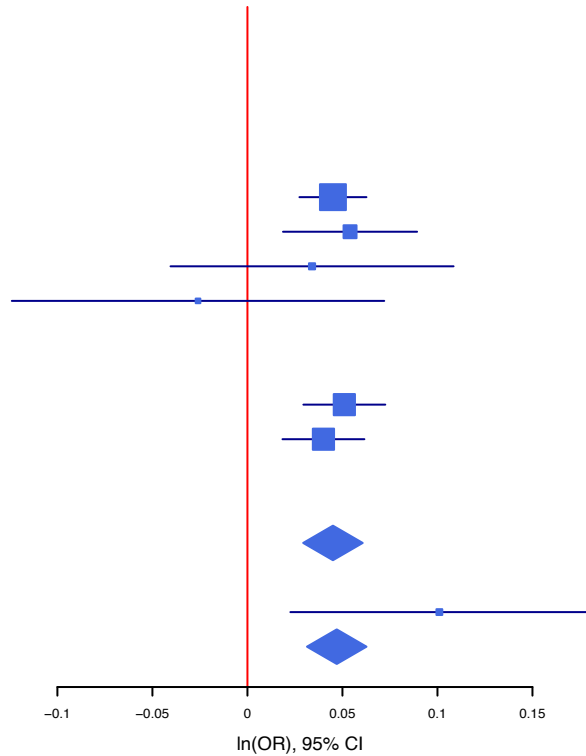

| rs6504163                                          | C/T      |             | 17:61545779     |                     | het_P:               | 0.811         | het_I:       | 0.0 |
|----------------------------------------------------|----------|-------------|-----------------|---------------------|----------------------|---------------|--------------|-----|
|                                                    | ngt      | info        | p_value         | f_ca(n)             |                      |               |              |     |
| PGC_SCZ wave3 eur only                             | 0        | 0.96        | 1.57e-06        | 0.369(53386)        | 0.379(77258)         | -0.044        | 0.009        |     |
| PGC_SCZ wave3 asn only                             | 0        | 0.89        | 0.000105        | 0.343(14004)        | 0.355(16757)         | -0.073        | 0.019        |     |
| PGC_SCZ afram only                                 | -        | 0.91        | 0.687           | -(6152)             | 0.116(3918)          | -0.019        | 0.048        |     |
| PGC_SCZ latino only                                | -        | 0.96        | 0.279           | -(1234)             | 0.275(3090)          | -0.061        | 0.057        |     |
| PGC_SCZ wave2 only                                 | 0        | 0.94        | 0.00136         | 0.371(34850)        | 0.379(44347)         | -0.037        | 0.012        |     |
| PGC_SCZ wave3 (excl. wave2)                        | 0        | 0.94        | 8.18e-08        | 0.292(39926)        | 0.318(56676)         | -0.06         | 0.011        |     |
| <b>PGC_SCZ wave3 (incl. wave2)</b>                 | <b>0</b> | <b>0.94</b> | <b>1.23e-09</b> | <b>0.323(74776)</b> | <b>0.342(101023)</b> | <b>-0.049</b> | <b>0.008</b> |     |
| Decode – Replication                               | -        | 1.00        | 0.182           | 0.377(1979)         | 0.363(142627)        | -0.052        | 0.039        |     |
| <b>PGC_SCZ wave3 (incl. wave2 and replication)</b> | <b>0</b> | <b>0.97</b> | <b>4.98e-10</b> | <b>0.324(76755)</b> | <b>0.354(243650)</b> | <b>-0.049</b> | <b>0.008</b> |     |

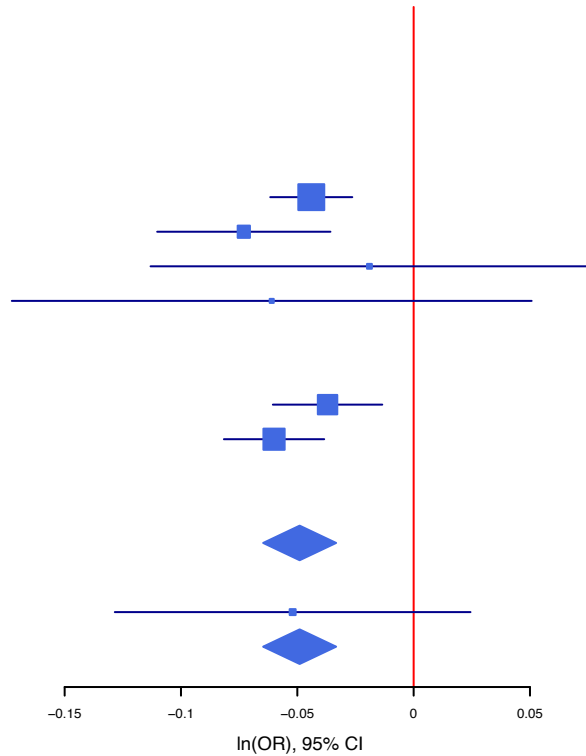

| rs246024                                           | C/T      |             | 5:140333952     |                     | het_P:               | 0.201        | het_I:       | 37.7 |
|----------------------------------------------------|----------|-------------|-----------------|---------------------|----------------------|--------------|--------------|------|
|                                                    | +-       |             |                 |                     |                      |              |              |      |
|                                                    | ngt      | info        | p_value         | f_ca(n)             | f_co(n)              | ln(OR)       | STDerr       |      |
| PGC_SCZ wave3 eur only                             | 0        | 0.99        | 3.61e-08        | 0.498(53386)        | 0.489(77258)         | 0.048        | 0.009        |      |
| PGC_SCZ wave3 asn only                             | 0        | 1.00        | 0.0144          | 0.399(14004)        | 0.387(16757)         | 0.043        | 0.017        |      |
| PGC_SCZ afram only                                 | -        | 0.96        | 0.714           | -(6152)             | 0.304(3918)          | -0.012       | 0.032        |      |
| PGC_SCZ latino only                                | -        | 0.99        | 0.226           | -(1234)             | 0.44(3090)           | 0.061        | 0.05         |      |
| PGC_SCZ wave2 only                                 | 0        | 1.00        | 1.1e-05         | 0.496(34850)        | 0.489(44347)         | 0.048        | 0.011        |      |
| PGC_SCZ wave3 (excl. wave2)                        | 0        | 0.98        | 7.98e-05        | 0.424(39926)        | 0.43(56676)          | 0.04         | 0.01         |      |
| <b>PGC_SCZ wave3 (incl. wave2)</b>                 | <b>0</b> | <b>0.99</b> | <b>3.54e-09</b> | <b>0.452(74776)</b> | <b>0.453(101023)</b> | <b>0.044</b> | <b>0.007</b> |      |
| Decode – Replication                               | -        | 1.00        | 0.0262          | 0.475(1979)         | 0.481(142627)        | 0.086        | 0.039        |      |
| <b>PGC_SCZ wave3 (incl. wave2 and replication)</b> | <b>0</b> | <b>1.00</b> | <b>5.03e-10</b> | <b>0.452(76755)</b> | <b>0.469(243650)</b> | <b>0.045</b> | <b>0.007</b> |      |

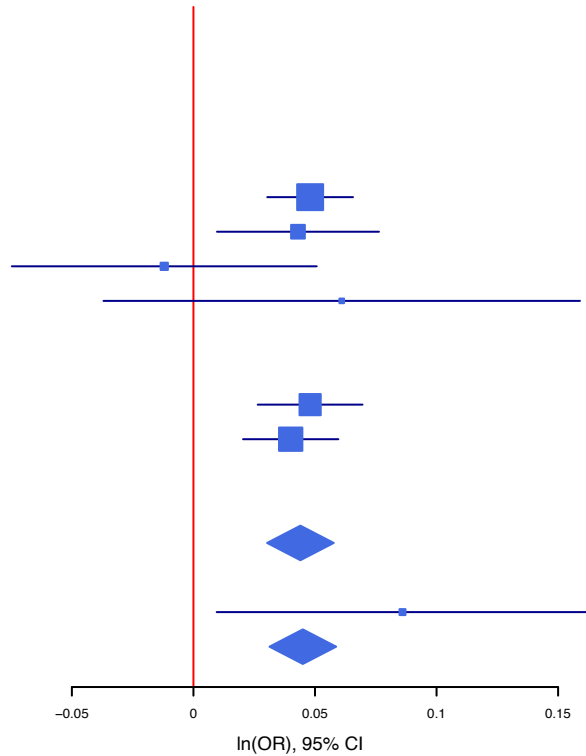

rs167924

A/G  
 --- 3:107379837  
 het\_P: 0.404 het\_I: 0.0

|                                                    | ngt       | info        | p_value         | f_ca(n)             | f_co(n)              | ln(OR)        | STDerr       |
|----------------------------------------------------|-----------|-------------|-----------------|---------------------|----------------------|---------------|--------------|
| PGC_SCZ wave3 eur only                             | 27        | 1.00        | 2.34e-08        | 0.359(53386)        | 0.369(77258)         | -0.05         | 0.009        |
| PGC_SCZ wave3 asn only                             | 4         | 0.82        | 0.271           | 0.038(14004)        | 0.039(16757)         | -0.072        | 0.066        |
| PGC_SCZ afram only                                 | -         | 1.01        | 0.00328         | -(6152)             | 0.701(3918)          | -0.095        | 0.032        |
| PGC_SCZ latino only                                | -         | 1.01        | 0.226           | -(1234)             | 0.299(3090)          | -0.065        | 0.054        |
| PGC_SCZ wave2 only                                 | 24        | 1.00        | 2.14e-05        | 0.338(34850)        | 0.358(44347)         | -0.049        | 0.012        |
| PGC_SCZ wave3 (excl. wave2)                        | 7         | 0.97        | 1.64e-06        | 0.362(39926)        | 0.364(56676)         | -0.06         | 0.012        |
| <b>PGC_SCZ wave3 (incl. wave2)</b>                 | <b>31</b> | <b>0.98</b> | <b>1.84e-10</b> | <b>0.351(74776)</b> | <b>0.36(101023)</b>  | <b>-0.054</b> | <b>0.008</b> |
| Decode – Replication                               | -         | 1.00        | 0.965           | 0.336(1979)         | 0.362(142627)        | 0.002         | 0.04         |
| <b>PGC_SCZ wave3 (incl. wave2 and replication)</b> | <b>31</b> | <b>0.99</b> | <b>5.45e-10</b> | <b>0.351(76755)</b> | <b>0.361(243650)</b> | <b>-0.052</b> | <b>0.008</b> |

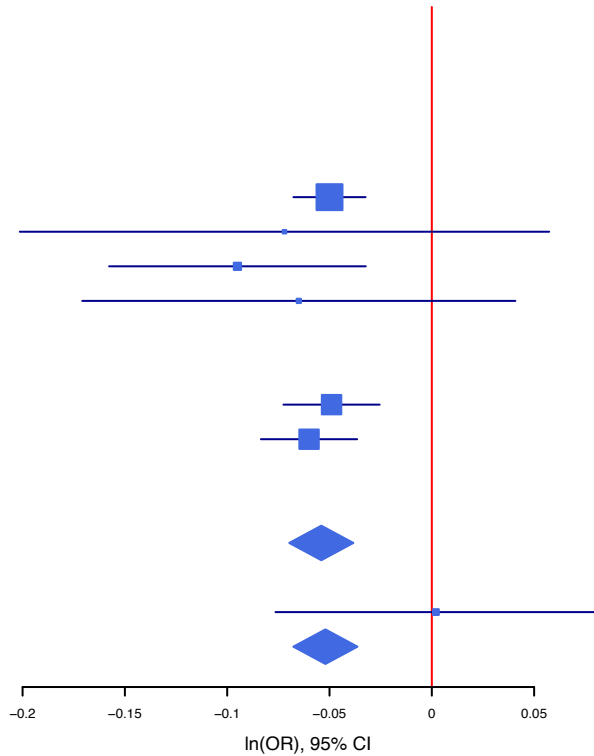

rs72986630 C/T 19:11849736  
 ++- het\_P: 0.42 het\_I: 0.0

|                                                    | ngt       | info        | p_value         | f_ca(n)             | f_co(n)              | ln(OR)        | STDerr       |
|----------------------------------------------------|-----------|-------------|-----------------|---------------------|----------------------|---------------|--------------|
| PGC_SCZ wave3 eur only                             | 30        | 0.87        | 3.59e-10        | 0.926(53386)        | 0.932(77258)         | -0.112        | 0.018        |
| PGC_SCZ wave3 asn only                             | 0         | 0.32        | 0.544           | 0.983(14004)        | 0.982(16757)         | -0.08         | 0.132        |
| PGC_SCZ afram only                                 | -         | 0.78        | 0.94            | -(6152)             | 0.986(3918)          | -0.011        | 0.14         |
| PGC_SCZ latino only                                | -         | 0.83        | 0.724           | -(1234)             | 0.964(3090)          | 0.051         | 0.145        |
| PGC_SCZ wave2 only                                 | 1         | 0.82        | 1.03e-08        | 0.928(34850)        | 0.933(44347)         | -0.134        | 0.023        |
| PGC_SCZ wave3 (excl. wave2)                        | 29        | 0.78        | 0.00446         | 0.957(39926)        | 0.955(56676)         | -0.075        | 0.026        |
| <b>PGC_SCZ wave3 (incl. wave2)</b>                 | <b>30</b> | <b>0.80</b> | <b>6.31e-10</b> | <b>0.945(74776)</b> | <b>0.946(101023)</b> | <b>-0.108</b> | <b>0.017</b> |
| Decode - Replication                               | -         | 0.99        | 0.514           | 0.932(1979)         | 0.941(142627)        | -0.057        | 0.087        |
| <b>PGC_SCZ wave3 (incl. wave2 and replication)</b> | <b>30</b> | <b>0.91</b> | <b>5.53e-10</b> | <b>0.945(76755)</b> | <b>0.943(243650)</b> | <b>-0.106</b> | <b>0.017</b> |

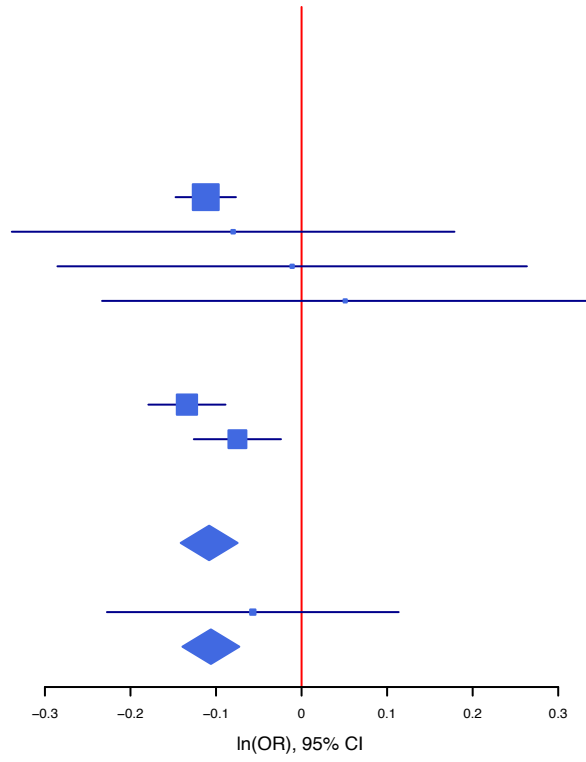

rs7699241 C/T 4:166204489  
 +++ het\_P: 0.711 het\_I: 0.0

|                                                    | ngt      | info        | p_value         | f_ca(n)             | f_co(n)              | ln(OR)        | STDerr       |
|----------------------------------------------------|----------|-------------|-----------------|---------------------|----------------------|---------------|--------------|
| PGC_SCZ wave3 eur only                             | 0        | 0.97        | 2.05e-07        | 0.903(53386)        | 0.909(77258)         | -0.078        | 0.015        |
| PGC_SCZ wave3 asn only                             | 0        | 0.95        | 0.0849          | 0.842(14004)        | 0.843(16757)         | -0.041        | 0.024        |
| PGC_SCZ afram only                                 | -        | 0.93        | 0.00653         | -(6152)             | 0.766(3918)          | -0.098        | 0.036        |
| PGC_SCZ latino only                                | -        | 0.97        | 0.584           | -(1234)             | 0.923(3090)          | -0.051        | 0.094        |
| PGC_SCZ wave2 only                                 | 0        | 0.99        | 0.00324         | 0.902(34850)        | 0.907(44347)         | -0.055        | 0.019        |
| PGC_SCZ wave3 (excl. wave2)                        | 0        | 0.95        | 1.31e-07        | 0.865(39926)        | 0.876(56676)         | -0.082        | 0.016        |
| <b>PGC_SCZ wave3 (incl. wave2)</b>                 | <b>0</b> | <b>0.96</b> | <b>2.76e-09</b> | <b>0.88(74776)</b>  | <b>0.887(101023)</b> | <b>-0.071</b> | <b>0.012</b> |
| Decode – Replication                               | -        | 1.00        | 0.0547          | 0.907(1979)         | 0.911(142627)        | -0.118        | 0.061        |
| <b>PGC_SCZ wave3 (incl. wave2 and replication)</b> | <b>0</b> | <b>0.98</b> | <b>5.7e-10</b>  | <b>0.881(76755)</b> | <b>0.9(243650)</b>   | <b>-0.072</b> | <b>0.012</b> |

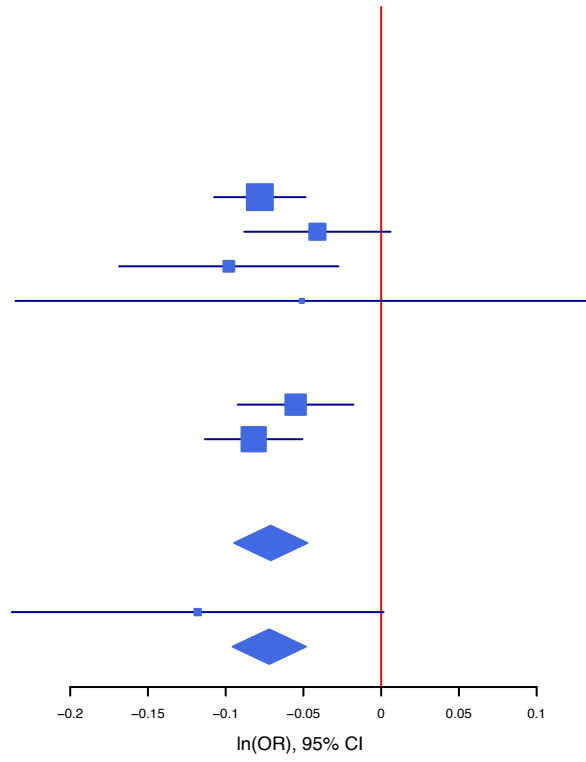



rs62152282

A/T 2:104981749  
-?? het\_P: 1.0 het\_I: 0.0

|                                                    | ngt      | info        | p_value         | f_ca(n)             | f_co(n)              | ln(OR)        | STDerr       |
|----------------------------------------------------|----------|-------------|-----------------|---------------------|----------------------|---------------|--------------|
| PGC_SCZ wave3 eur only                             | 0        | 1.00        | 1.34e-06        | 0.813(53386)        | 0.821(77258)         | -0.054        | 0.011        |
| PGC_SCZ wave3 asn only                             | 0        | 0.97        | 9.58e-05        | 0.612(14004)        | 0.627(16757)         | -0.069        | 0.018        |
| PGC_SCZ wave2 only                                 | 0        | 1.00        | 0.00136         | 0.803(34850)        | 0.816(44347)         | -0.044        | 0.014        |
| PGC_SCZ wave3 (excl. wave2)                        | 0        | 0.99        | 5.21e-08        | 0.738(39926)        | 0.759(56676)         | -0.07         | 0.013        |
| <b>PGC_SCZ wave3 (incl. wave2)</b>                 | <b>0</b> | <b>0.99</b> | <b>6.4e-10</b>  | <b>0.771(74776)</b> | <b>0.786(101023)</b> | <b>-0.058</b> | <b>0.009</b> |
| Decode - Replication                               | -        | 0.99        | 0.627           | 0.844(1979)         | 0.841(142627)        | -0.04         | 0.082        |
| <b>PGC_SCZ wave3 (incl. wave2 and replication)</b> | <b>0</b> | <b>0.99</b> | <b>5.81e-10</b> | <b>0.772(76755)</b> | <b>0.787(243650)</b> | <b>-0.058</b> | <b>0.009</b> |

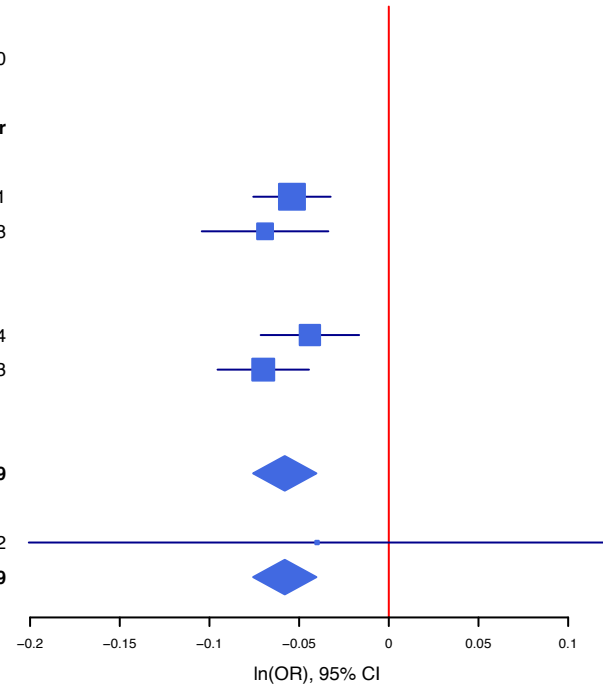

rs39967

T/C

5:57744788

---

het\_P:

0.663

het\_I:

0.0

|  | ngt | info | p_value | f_ca(n) | f_co(n) | ln(OR) | STDerr |
|--|-----|------|---------|---------|---------|--------|--------|
|--|-----|------|---------|---------|---------|--------|--------|

PGC\_SCZ wave3 eur only

|                        |    |      |          |              |              |        |       |
|------------------------|----|------|----------|--------------|--------------|--------|-------|
| PGC_SCZ wave3 eur only | 13 | 0.99 | 4.38e-08 | 0.169(53386) | 0.179(77258) | -0.062 | 0.011 |
|------------------------|----|------|----------|--------------|--------------|--------|-------|

PGC\_SCZ wave3 asn only

|                        |   |      |       |              |              |        |       |
|------------------------|---|------|-------|--------------|--------------|--------|-------|
| PGC_SCZ wave3 asn only | 3 | 0.96 | 0.164 | 0.079(14004) | 0.081(16757) | -0.044 | 0.032 |
|------------------------|---|------|-------|--------------|--------------|--------|-------|

PGC\_SCZ afram only

|                    |   |      |       |         |             |        |      |
|--------------------|---|------|-------|---------|-------------|--------|------|
| PGC_SCZ afram only | - | 1.00 | 0.182 | -(6152) | 0.034(3918) | -0.107 | 0.08 |
|--------------------|---|------|-------|---------|-------------|--------|------|

PGC\_SCZ latino only

|                     |   |      |       |         |             |        |      |
|---------------------|---|------|-------|---------|-------------|--------|------|
| PGC_SCZ latino only | - | 1.01 | 0.949 | -(1234) | 0.107(3090) | -0.005 | 0.08 |
|---------------------|---|------|-------|---------|-------------|--------|------|

PGC\_SCZ wave2 only

|                    |    |      |          |              |              |        |       |
|--------------------|----|------|----------|--------------|--------------|--------|-------|
| PGC_SCZ wave2 only | 13 | 0.99 | 0.000118 | 0.164(34850) | 0.175(44347) | -0.056 | 0.014 |
|--------------------|----|------|----------|--------------|--------------|--------|-------|

PGC\_SCZ wave3 (excl. wave2)

|                             |   |      |          |              |              |        |       |
|-----------------------------|---|------|----------|--------------|--------------|--------|-------|
| PGC_SCZ wave3 (excl. wave2) | 3 | 0.99 | 2.24e-05 | 0.109(39926) | 0.125(56676) | -0.065 | 0.015 |
|-----------------------------|---|------|----------|--------------|--------------|--------|-------|

**PGC\_SCZ wave3 (incl. wave2)**

|                                    |           |             |                 |                     |                      |              |             |
|------------------------------------|-----------|-------------|-----------------|---------------------|----------------------|--------------|-------------|
| <b>PGC_SCZ wave3 (incl. wave2)</b> | <b>16</b> | <b>0.99</b> | <b>1.01e-08</b> | <b>0.131(74776)</b> | <b>0.144(101023)</b> | <b>-0.06</b> | <b>0.01</b> |
|------------------------------------|-----------|-------------|-----------------|---------------------|----------------------|--------------|-------------|

Decode - Replication

|                      |   |      |         |             |               |        |      |
|----------------------|---|------|---------|-------------|---------------|--------|------|
| Decode - Replication | - | 1.00 | 0.00462 | 0.166(1979) | 0.163(142627) | -0.143 | 0.05 |
|----------------------|---|------|---------|-------------|---------------|--------|------|

**PGC\_SCZ wave3 (incl. wave2 and replication)**

|                                                    |           |             |                 |                     |                      |               |             |
|----------------------------------------------------|-----------|-------------|-----------------|---------------------|----------------------|---------------|-------------|
| <b>PGC_SCZ wave3 (incl. wave2 and replication)</b> | <b>16</b> | <b>1.00</b> | <b>6.04e-10</b> | <b>0.132(76755)</b> | <b>0.155(243650)</b> | <b>-0.064</b> | <b>0.01</b> |
|----------------------------------------------------|-----------|-------------|-----------------|---------------------|----------------------|---------------|-------------|

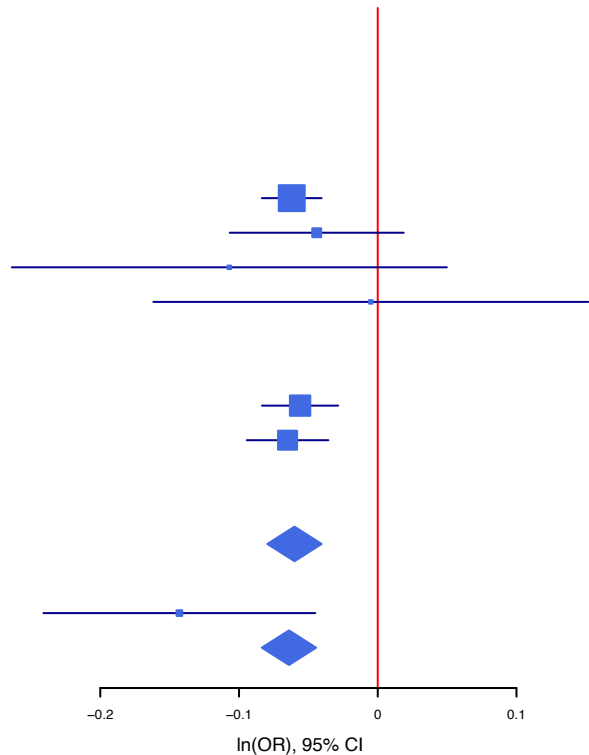

rs815609

A/G

5:153516901

---

het\_P:

0.408

het\_I:

0.0

ngt info p\_value f\_ca(n) f\_co(n) ln(OR) STDerr

PGC\_SCZ wave3 eur only 0 1.00 1.36e-07 0.362(53386) 0.372(77258) -0.047 0.009

PGC\_SCZ wave3 asn only 0 0.91 0.0251 0.934(14004) 0.943(16757) -0.089 0.04

PGC\_SCZ afram only - 0.99 0.0122 -(6152) 0.138(3918) -0.108 0.043

PGC\_SCZ latino only - 1.03 0.321 -(1234) 0.627(3090) -0.051 0.052

PGC\_SCZ wave2 only 0 1.00 6.04e-06 0.393(34850) 0.386(44347) -0.051 0.011

PGC\_SCZ wave3 (excl. wave2) 0 0.98 4.3e-05 0.498(39926) 0.5(56676) -0.051 0.012

**PGC\_SCZ wave3 (incl. wave2) 0 0.99 1.06e-09 0.457(74776) 0.457(101023) -0.051 0.008**

Decode - Replication - 1.00 0.306 0.364(1979) 0.381(142627) -0.041 0.04

**PGC\_SCZ wave3 (incl. wave2 and replication) 0 0.99 6.13e-10 0.455(76755) 0.415(243650) -0.051 0.008**

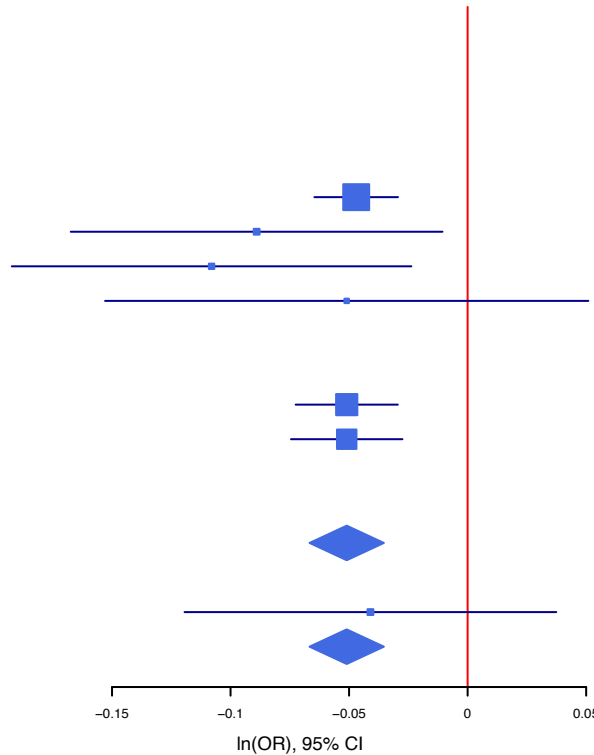

| rs7900775                                          | T/C       |             | 10:106600343    |                     | het_P:               | 0.713        | het_I:       | 0.0 |
|----------------------------------------------------|-----------|-------------|-----------------|---------------------|----------------------|--------------|--------------|-----|
|                                                    | ngt       | info        | p_value         | f_ca(n)             |                      |              |              |     |
| PGC_SCZ wave3 eur only                             | 66        | 1.00        | 3.82e-08        | 0.371(53386)        | 0.359(77258)         | 0.049        | 0.009        |     |
| PGC_SCZ wave3 asn only                             | 9         | 0.99        | 0.683           | 0.148(14004)        | 0.144(16757)         | 0.01         | 0.024        |     |
| PGC_SCZ afram only                                 | -         | 1.00        | 0.0181          | -(6152)             | 0.452(3918)          | 0.069        | 0.029        |     |
| PGC_SCZ latino only                                | -         | 1.04        | 0.404           | -(1234)             | 0.288(3090)          | 0.045        | 0.054        |     |
| PGC_SCZ wave2 only                                 | 29        | 1.00        | 1.1e-05         | 0.358(34850)        | 0.351(44347)         | 0.05         | 0.011        |     |
| PGC_SCZ wave3 (excl. wave2)                        | 46        | 1.01        | 0.000134        | 0.321(39926)        | 0.317(56676)         | 0.043        | 0.011        |     |
| <b>PGC_SCZ wave3 (incl. wave2)</b>                 | <b>75</b> | <b>1.00</b> | <b>7.45e-09</b> | <b>0.336(74776)</b> | <b>0.33(101023)</b>  | <b>0.046</b> | <b>0.008</b> |     |
| Decode – Replication                               | -         | 1.00        | 0.00849         | 0.353(1979)         | 0.354(142627)        | 0.103        | 0.039        |     |
| <b>PGC_SCZ wave3 (incl. wave2 and replication)</b> | <b>75</b> | <b>1.00</b> | <b>6.21e-10</b> | <b>0.336(76755)</b> | <b>0.343(243650)</b> | <b>0.049</b> | <b>0.008</b> |     |

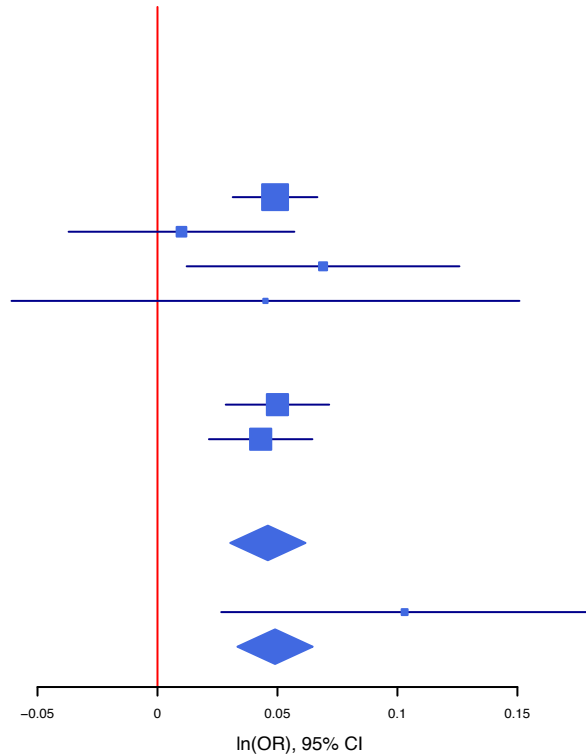

|                                                    | C/T       |             | 1:173580303     |                     | het_P:               | 0.963        | het_I:       | 0.0 |
|----------------------------------------------------|-----------|-------------|-----------------|---------------------|----------------------|--------------|--------------|-----|
|                                                    | ngt       | info        | p_value         | f_ca(n)             |                      |              |              |     |
| PGC_SCZ wave3 eur only                             | 7         | 0.99        | 2.45e-07        | 0.88(53386)         | 0.874(77258)         | 0.068        | 0.013        |     |
| PGC_SCZ wave3 asn only                             | 3         | 0.97        | 0.000847        | 0.75(14004)         | 0.742(16757)         | 0.067        | 0.02         |     |
| PGC_SCZ afram only                                 | -         | 0.96        | 0.414           | -(6152)             | 0.977(3918)          | 0.082        | 0.1          |     |
| PGC_SCZ latino only                                | -         | 0.98        | 0.623           | -(1234)             | 0.923(3090)          | 0.046        | 0.093        |     |
| PGC_SCZ wave2 only                                 | 2         | 0.99        | 0.000124        | 0.873(34850)        | 0.872(44347)         | 0.063        | 0.016        |     |
| PGC_SCZ wave3 (excl. wave2)                        | 8         | 0.98        | 9.55e-07        | 0.879(39926)        | 0.867(56676)         | 0.071        | 0.014        |     |
| <b>PGC_SCZ wave3 (incl. wave2)</b>                 | <b>10</b> | <b>0.98</b> | <b>5.2e-10</b>  | <b>0.876(74776)</b> | <b>0.869(101023)</b> | <b>0.067</b> | <b>0.011</b> |     |
| Decode – Replication                               | -         | 1.00        | 0.613           | 0.872(1979)         | 0.879(142627)        | 0.03         | 0.06         |     |
| <b>PGC_SCZ wave3 (incl. wave2 and replication)</b> | <b>10</b> | <b>0.99</b> | <b>6.26e-10</b> | <b>0.876(76755)</b> | <b>0.874(243650)</b> | <b>0.066</b> | <b>0.011</b> |     |

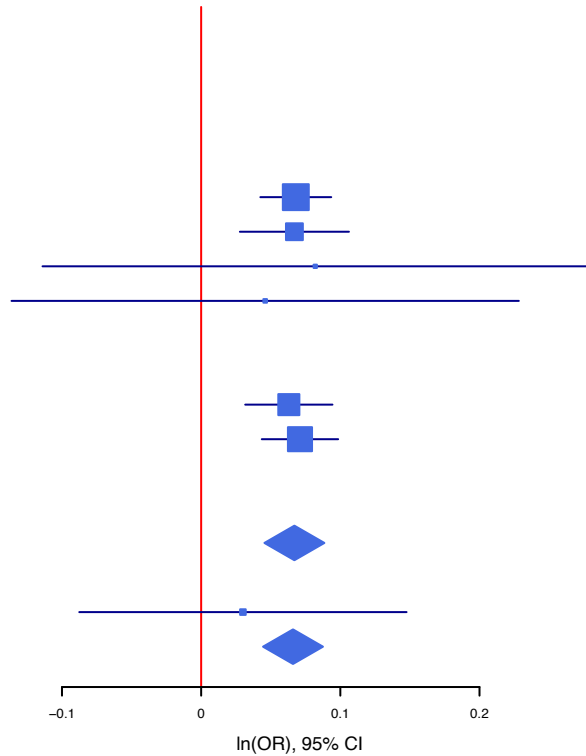

| rs2944821                                          | G/C      |             | 7:71795998      |                     | het_P:               | 0.477        | het_I:       | 0.0 |
|----------------------------------------------------|----------|-------------|-----------------|---------------------|----------------------|--------------|--------------|-----|
|                                                    | ngt      | info        | p_value         | f_ca(n)             |                      |              |              |     |
| PGC_SCZ wave3 eur only                             | 0        | 1.00        | 8.22e-08        | 0.574(53386)        | 0.564(77258)         | 0.047        | 0.009        |     |
| PGC_SCZ wave3 asn only                             | 0        | 0.98        | 0.00636         | 0.756(14004)        | 0.749(16757)         | 0.054        | 0.02         |     |
| PGC_SCZ afram only                                 | -        | 0.95        | 0.0275          | -(6152)             | 0.891(3918)          | 0.108        | 0.049        |     |
| PGC_SCZ latino only                                | -        | 0.98        | 0.333           | -(1234)             | 0.685(3090)          | 0.053        | 0.054        |     |
| PGC_SCZ wave2 only                                 | 0        | 1.00        | 0.00041         | 0.587(34850)        | 0.576(44347)         | 0.039        | 0.011        |     |
| PGC_SCZ wave3 (excl. wave2)                        | 0        | 0.98        | 4.92e-08        | 0.698(39926)        | 0.667(56676)         | 0.06         | 0.011        |     |
| <b>PGC_SCZ wave3 (incl. wave2)</b>                 | <b>0</b> | <b>0.99</b> | <b>2.51e-10</b> | <b>0.654(74776)</b> | <b>0.632(101023)</b> | <b>0.049</b> | <b>0.008</b> |     |
| Decode – Replication                               | -        | 1.00        | 0.922           | 0.523(1979)         | 0.502(142627)        | -0.004       | 0.038        |     |
| <b>PGC_SCZ wave3 (incl. wave2 and replication)</b> | <b>0</b> | <b>1.00</b> | <b>6.31e-10</b> | <b>0.651(76755)</b> | <b>0.56(243650)</b>  | <b>0.047</b> | <b>0.008</b> |     |

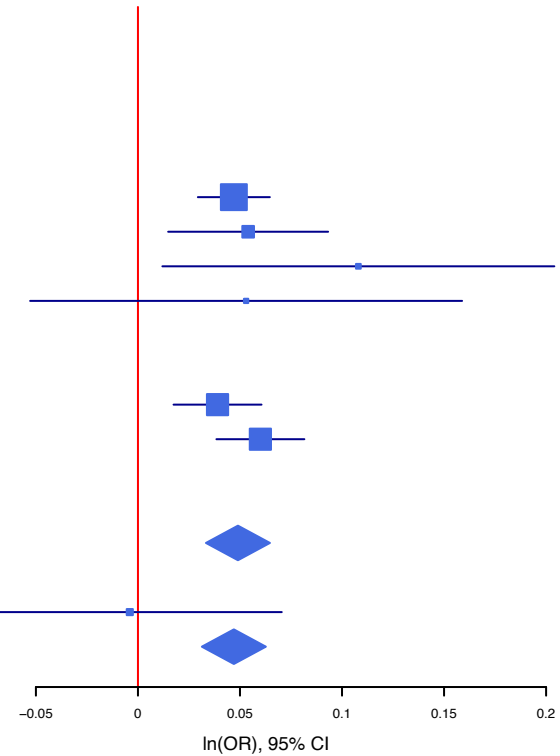

| rs6461561                                          | C/G       |             | 7:21474610      |                     | 0.95                 | het_I:       | 0.0          |
|----------------------------------------------------|-----------|-------------|-----------------|---------------------|----------------------|--------------|--------------|
|                                                    | +++       | het_P:      |                 |                     |                      |              |              |
|                                                    | ngt       | info        | p_value         | f_ca(n)             | f_co(n)              | ln(OR)       | STDerr       |
| PGC_SCZ wave3 eur only                             | 22        | 0.99        | 8.98e-08        | 0.312(53386)        | 0.301(77258)         | 0.05         | 0.009        |
| PGC_SCZ wave3 asn only                             | 4         | 0.93        | 0.00279         | 0.09(14004)         | 0.082(16757)         | 0.096        | 0.032        |
| PGC_SCZ afram only                                 | -         | 0.99        | 0.412           | -(6152)             | 0.113(3918)          | 0.038        | 0.047        |
| PGC_SCZ latino only                                | -         | 1.01        | 0.308           | -(1234)             | 0.262(3090)          | 0.057        | 0.056        |
| PGC_SCZ wave2 only                                 | 17        | 0.99        | 3.43e-06        | 0.302(34850)        | 0.298(44347)         | 0.055        | 0.012        |
| PGC_SCZ wave3 (excl. wave2)                        | 9         | 0.98        | 7.19e-05        | 0.211(39926)        | 0.217(56676)         | 0.051        | 0.013        |
| <b>PGC_SCZ wave3 (incl. wave2)</b>                 | <b>26</b> | <b>0.99</b> | <b>1.22e-09</b> | <b>0.246(74776)</b> | <b>0.248(101023)</b> | <b>0.053</b> | <b>0.009</b> |
| Decode – Replication                               | -         | 1.00        | 0.336           | 0.294(1979)         | 0.312(142627)        | 0.039        | 0.041        |
| <b>PGC_SCZ wave3 (incl. wave2 and replication)</b> | <b>26</b> | <b>0.99</b> | <b>6.8e-10</b>  | <b>0.247(76755)</b> | <b>0.283(243650)</b> | <b>0.052</b> | <b>0.008</b> |

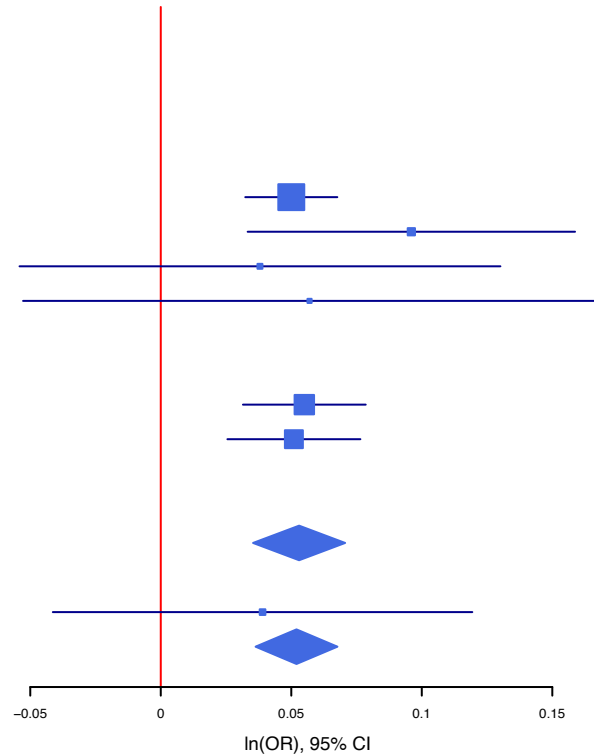

| rs79212538                                         | G/T      |             | 5:151993104     |                    | 0.003                | het_I:        | 88.9         |  |  |
|----------------------------------------------------|----------|-------------|-----------------|--------------------|----------------------|---------------|--------------|--|--|
|                                                    | +?+      |             | het_P:          |                    |                      |               |              |  |  |
|                                                    | ngt      | info        | p_value         | f_ca(n)            | f_co(n)              | ln(OR)        | STDerr       |  |  |
| PGC_SCZ wave3 eur only                             | 5        | 0.98        | 4.33e-08        | 0.95(53386)        | 0.954(77258)         | -0.111        | 0.02         |  |  |
| PGC_SCZ wave3 asn only                             | 0        | 0.67        | 0.218           | 0.985(14004)       | 0.985(16757)         | -0.124        | 0.101        |  |  |
| PGC_SCZ latino only                                | -        | 0.99        | 0.000391        | -(1234)            | 0.988(3090)          | -0.744        | 0.21         |  |  |
| PGC_SCZ wave2 only                                 | 0        | 0.97        | 6.41e-08        | 0.95(34850)        | 0.954(44347)         | -0.139        | 0.026        |  |  |
| PGC_SCZ wave3 (excl. wave2)                        | 5        | 0.92        | 0.00586         | 0.969(39926)       | 0.967(56676)         | -0.086        | 0.031        |  |  |
| <b>PGC_SCZ wave3 (incl. wave2)</b>                 | <b>5</b> | <b>0.94</b> | <b>3.16e-09</b> | <b>0.96(74776)</b> | <b>0.961(101023)</b> | <b>-0.117</b> | <b>0.02</b>  |  |  |
| Decode – Replication                               | -        | 1.00        | 0.0894          | 0.96(1979)         | 0.964(142627)        | -0.134        | 0.079        |  |  |
| <b>PGC_SCZ wave3 (incl. wave2 and replication)</b> | <b>5</b> | <b>0.97</b> | <b>7.3e-10</b>  | <b>0.96(76755)</b> | <b>0.963(243650)</b> | <b>-0.118</b> | <b>0.019</b> |  |  |

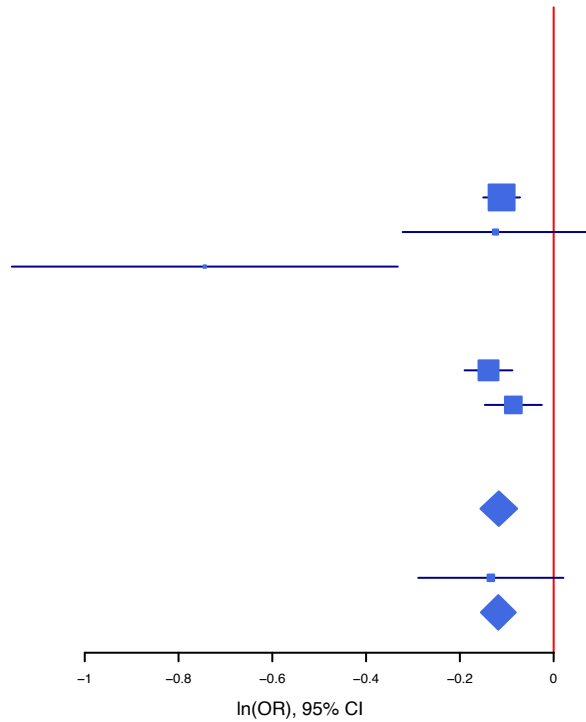



rs16940992                    A/G                    12:111207515  
 +++                    het\_P:                    0.955    het\_I:                    0.0

|                                                    | ngt       | info        | p_value         | f_ca(n)             | f_co(n)              | ln(OR)       | STDerr       |
|----------------------------------------------------|-----------|-------------|-----------------|---------------------|----------------------|--------------|--------------|
| PGC_SCZ wave3 eur only                             | 20        | 0.98        | 2.04e-08        | 0.86(53386)         | 0.854(77258)         | 0.07         | 0.012        |
| PGC_SCZ wave3 asn only                             | 3         | 0.90        | 0.325           | 0.943(14004)        | 0.942(16757)         | 0.038        | 0.038        |
| PGC_SCZ afram only                                 | -         | 0.95        | 0.0122          | -(6152)             | 0.544(3918)          | 0.076        | 0.03         |
| PGC_SCZ latino only                                | -         | 0.97        | 0.351           | -(1234)             | 0.889(3090)          | 0.074        | 0.079        |
| PGC_SCZ wave2 only                                 | 20        | 0.99        | 2.28e-05        | 0.867(34850)        | 0.859(44347)         | 0.067        | 0.016        |
| PGC_SCZ wave3 (excl. wave2)                        | 3         | 0.96        | 4.81e-06        | 0.82(39926)         | 0.83(56676)          | 0.069        | 0.015        |
| <b>PGC_SCZ wave3 (incl. wave2)</b>                 | <b>23</b> | <b>0.97</b> | <b>4.44e-10</b> | <b>0.838(74776)</b> | <b>0.842(101023)</b> | <b>0.068</b> | <b>0.011</b> |
| Decode – Replication                               | -         | 1.00        | 0.804           | 0.831(1979)         | 0.824(142627)        | 0.013        | 0.052        |
| <b>PGC_SCZ wave3 (incl. wave2 and replication)</b> | <b>23</b> | <b>0.99</b> | <b>7.36e-10</b> | <b>0.838(76755)</b> | <b>0.832(243650)</b> | <b>0.066</b> | <b>0.011</b> |

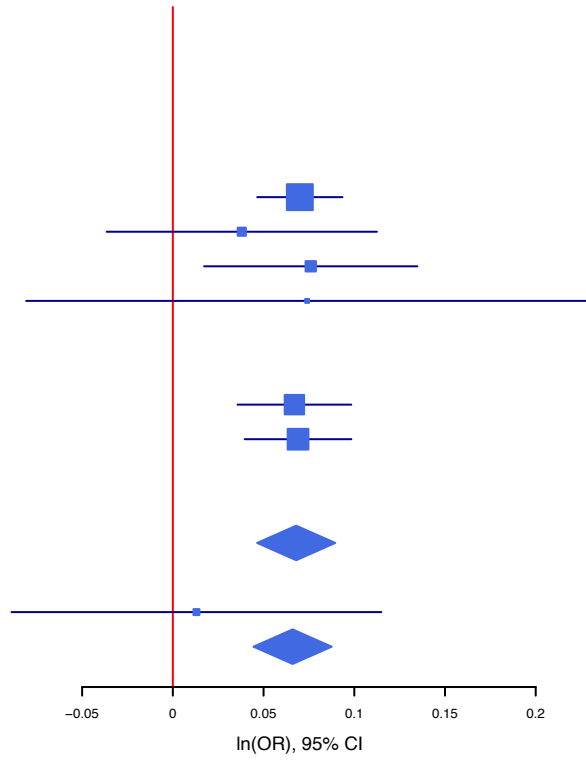

**rs61857878**                      **A/T**                      **10:92789488**  
 +++                      het\_P:                      0.792    het\_I:                      0.0

|                                                    | ngt      | info        | p_value         | f_ca(n)             | f_co(n)              | ln(OR)       | STDerr       |
|----------------------------------------------------|----------|-------------|-----------------|---------------------|----------------------|--------------|--------------|
| PGC_SCZ wave3 eur only                             | 0        | 0.95        | 4.44e-09        | 0.76(53386)         | 0.746(77258)         | 0.06         | 0.01         |
| PGC_SCZ wave3 asn only                             | 0        | 0.84        | 0.14            | 0.936(14004)        | 0.936(16757)         | 0.057        | 0.038        |
| PGC_SCZ afram only                                 | -        | 0.95        | 0.042           | -(6152)             | 0.866(3918)          | 0.089        | 0.044        |
| PGC_SCZ latino only                                | -        | 0.97        | 0.553           | -(1234)             | 0.877(3090)          | 0.045        | 0.076        |
| PGC_SCZ wave2 only                                 | 0        | 0.97        | 2.7e-05         | 0.769(34850)        | 0.753(44347)         | 0.054        | 0.013        |
| PGC_SCZ wave3 (excl. wave2)                        | 0        | 0.92        | 1.17e-06        | 0.844(39926)        | 0.825(56676)         | 0.069        | 0.014        |
| <b>PGC_SCZ wave3 (incl. wave2)</b>                 | <b>0</b> | <b>0.94</b> | <b>1.84e-10</b> | <b>0.814(74776)</b> | <b>0.797(101023)</b> | <b>0.061</b> | <b>0.01</b>  |
| Decode – Replication                               | -        | 1.00        | 0.775           | 0.775(1979)         | 0.761(142627)        | -0.013       | 0.044        |
| <b>PGC_SCZ wave3 (incl. wave2 and replication)</b> | <b>0</b> | <b>0.97</b> | <b>7.37e-10</b> | <b>0.813(76755)</b> | <b>0.777(243650)</b> | <b>0.058</b> | <b>0.009</b> |

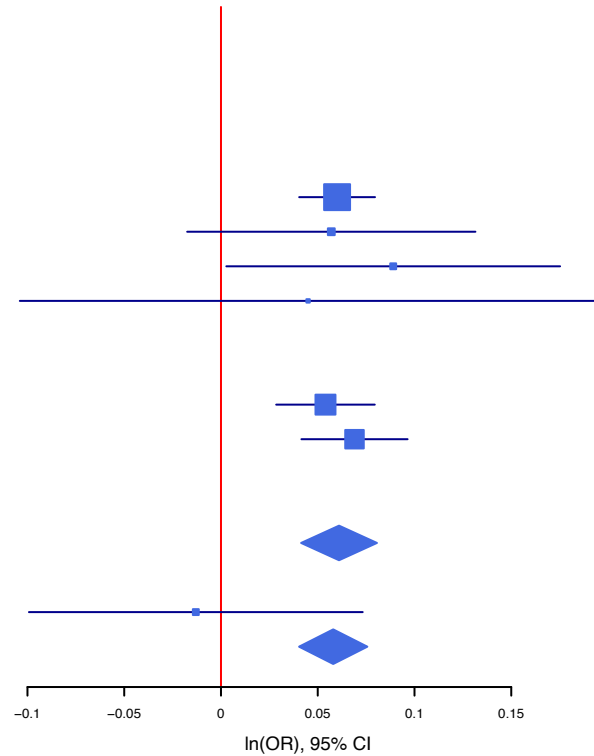

rs13233308

C/T  
---  
7:87244960  
het\_P: 0.003 het\_I: 83.0

|                                                    | ngt       | info        | p_value         | f_ca(n)             | f_co(n)              | ln(OR)       | STDerr       |
|----------------------------------------------------|-----------|-------------|-----------------|---------------------|----------------------|--------------|--------------|
| PGC_SCZ wave3 eur only                             | 50        | 0.99        | 1.75e-08        | 0.526(53386)        | 0.516(77258)         | 0.049        | 0.009        |
| PGC_SCZ wave3 asn only                             | 9         | 0.97        | 0.366           | 0.507(14004)        | 0.504(16757)         | 0.015        | 0.017        |
| PGC_SCZ afram only                                 | -         | 1.02        | 0.464           | -(6152)             | 0.908(3918)          | 0.038        | 0.052        |
| PGC_SCZ latino only                                | -         | 0.98        | 1.79e-05        | -(1234)             | 0.569(3090)          | 0.219        | 0.051        |
| PGC_SCZ wave2 only                                 | 18        | 0.98        | 1.23e-05        | 0.524(34850)        | 0.513(44347)         | 0.048        | 0.011        |
| PGC_SCZ wave3 (excl. wave2)                        | 41        | 1.00        | 2.58e-05        | 0.607(39926)        | 0.582(56676)         | 0.044        | 0.01         |
| <b>PGC_SCZ wave3 (incl. wave2)</b>                 | <b>59</b> | <b>0.99</b> | <b>1.23e-09</b> | <b>0.574(74776)</b> | <b>0.556(101023)</b> | <b>0.046</b> | <b>0.008</b> |
| Decode – Replication                               | -         | 1.00        | 0.429           | 0.498(1979)         | 0.533(142627)        | 0.03         | 0.038        |
| <b>PGC_SCZ wave3 (incl. wave2 and replication)</b> | <b>59</b> | <b>1.00</b> | <b>7.96e-10</b> | <b>0.572(76755)</b> | <b>0.543(243650)</b> | <b>0.045</b> | <b>0.007</b> |

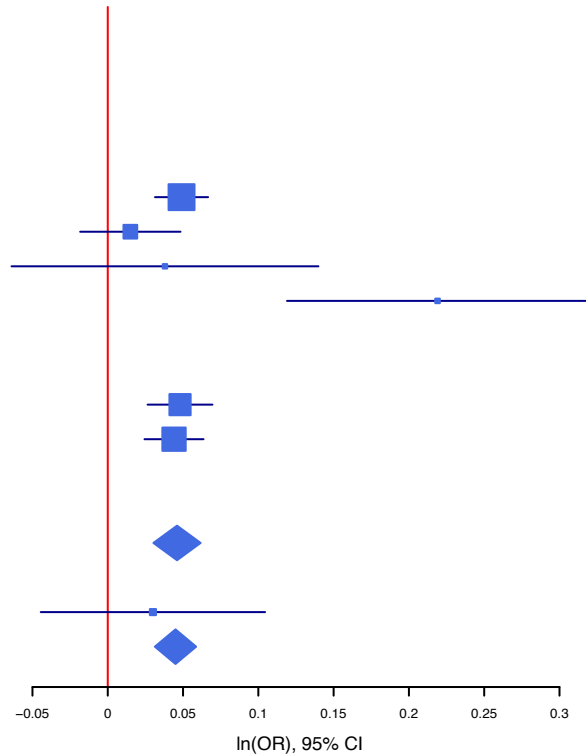

|                                                    | A/T      |             | 21:16439965     |                     | het_P:               | 0.83          | het_I:       | 0.0 |
|----------------------------------------------------|----------|-------------|-----------------|---------------------|----------------------|---------------|--------------|-----|
|                                                    | ---      |             |                 |                     |                      |               |              |     |
|                                                    | ngt      | info        | p_value         | f_ca(n)             | f_co(n)              | ln(OR)        | STDerr       |     |
| PGC_SCZ wave3 eur only                             | 0        | 0.94        | 1.16e-06        | 0.514(53386)        | 0.52(77258)          | -0.043        | 0.009        |     |
| PGC_SCZ wave3 asn only                             | 0        | 0.86        | 0.000259        | 0.594(14004)        | 0.614(16757)         | -0.069        | 0.019        |     |
| PGC_SCZ afram only                                 | -        | 0.98        | 0.331           | -(6152)             | 0.396(3918)          | -0.029        | 0.03         |     |
| PGC_SCZ latino only                                | -        | 1.02        | 0.284           | -(1234)             | 0.537(3090)          | -0.053        | 0.049        |     |
| PGC_SCZ wave2 only                                 | 0        | 0.94        | 1.16e-05        | 0.516(34850)        | 0.523(44347)         | -0.049        | 0.011        |     |
| PGC_SCZ wave3 (excl. wave2)                        | 0        | 0.94        | 2.14e-05        | 0.515(39926)        | 0.524(56676)         | -0.045        | 0.01         |     |
| <b>PGC_SCZ wave3 (incl. wave2)</b>                 | <b>0</b> | <b>0.94</b> | <b>9.48e-10</b> | <b>0.516(74776)</b> | <b>0.524(101023)</b> | <b>-0.047</b> | <b>0.008</b> |     |
| Decode – Replication                               | -        | 1.00        | 0.564           | 0.526(1979)         | 0.529(142627)        | -0.022        | 0.038        |     |
| <b>PGC_SCZ wave3 (incl. wave2 and replication)</b> | <b>0</b> | <b>0.97</b> | <b>8.27e-10</b> | <b>0.516(76755)</b> | <b>0.527(243650)</b> | <b>-0.046</b> | <b>0.008</b> |     |

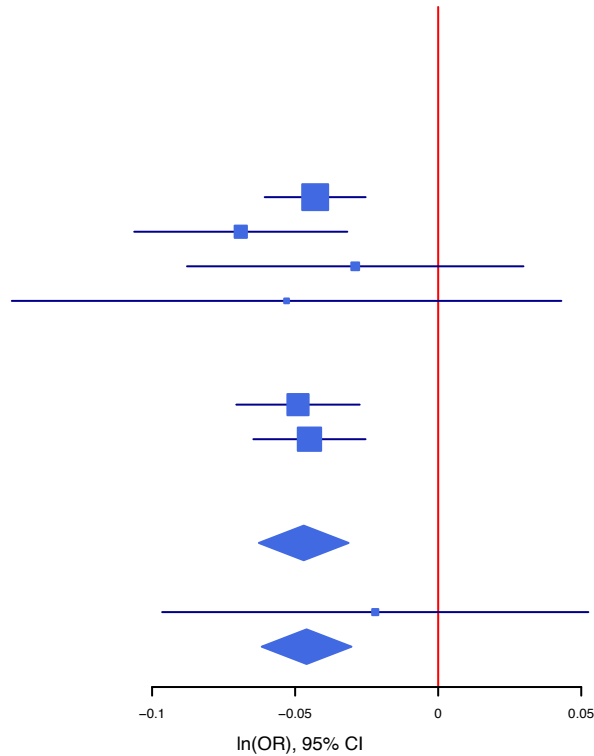

| rs2649999                                          | T/C      |             | 12:121380544    |                     | het_P:               | 0.751        | het_I:       | 0.0 |
|----------------------------------------------------|----------|-------------|-----------------|---------------------|----------------------|--------------|--------------|-----|
|                                                    | ngt      | info        | p_value         | f_ca(n)             |                      |              |              |     |
| PGC_SCZ wave3 eur only                             | 0        | 0.96        | 4.48e-06        | 0.357(53386)        | 0.349(77258)         | 0.042        | 0.009        |     |
| PGC_SCZ wave3 asn only                             | 0        | 0.92        | 1.41e-05        | 0.494(14004)        | 0.475(16757)         | 0.077        | 0.018        |     |
| PGC_SCZ afram only                                 | -        | 0.91        | 0.757           | -(6152)             | 0.127(3918)          | 0.014        | 0.046        |     |
| PGC_SCZ latino only                                | -        | 0.98        | 0.429           | -(1234)             | 0.37(3090)           | 0.041        | 0.052        |     |
| PGC_SCZ wave2 only                                 | 0        | 0.97        | 0.000316        | 0.37(34850)         | 0.36(44347)          | 0.041        | 0.012        |     |
| PGC_SCZ wave3 (excl. wave2)                        | 0        | 0.94        | 6.62e-07        | 0.341(39926)        | 0.342(56676)         | 0.055        | 0.011        |     |
| <b>PGC_SCZ wave3 (incl. wave2)</b>                 | <b>0</b> | <b>0.95</b> | <b>1.45e-09</b> | <b>0.353(74776)</b> | <b>0.349(101023)</b> | <b>0.048</b> | <b>0.008</b> |     |
| Decode – Replication                               | -        | 1.00        | 0.282           | 0.364(1979)         | 0.342(142627)        | 0.047        | 0.043        |     |
| <b>PGC_SCZ wave3 (incl. wave2 and replication)</b> | <b>0</b> | <b>0.98</b> | <b>8.61e-10</b> | <b>0.353(76755)</b> | <b>0.345(243650)</b> | <b>0.048</b> | <b>0.008</b> |     |

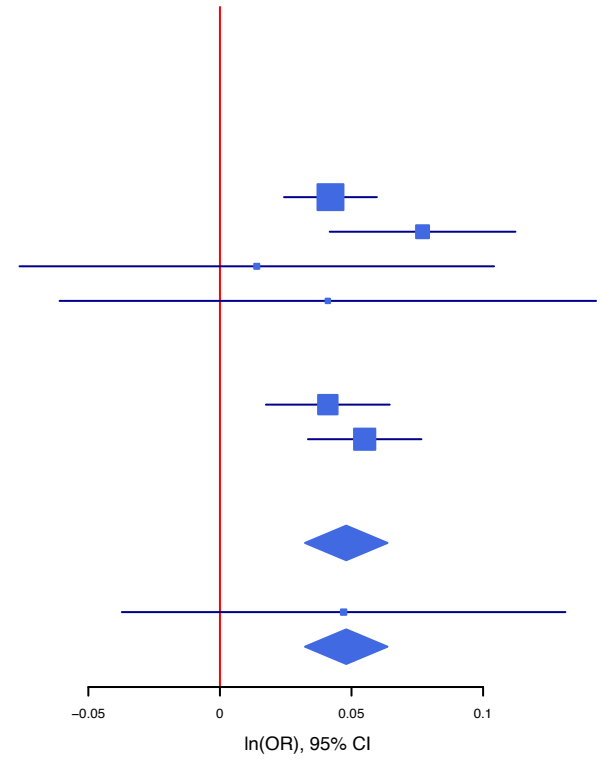

| rs8048039                                          | A/T      |             | 16:4498486      |                     | het_P:               | 0.531        | het_I:       | 0.0 |
|----------------------------------------------------|----------|-------------|-----------------|---------------------|----------------------|--------------|--------------|-----|
|                                                    | ngt      | info        | p_value         | f_ca(n)             |                      |              |              |     |
| PGC_SCZ wave3 eur only                             | 0        | 0.96        | 7.48e-07        | 0.344(53386)        | 0.332(77258)         | 0.046        | 0.009        |     |
| PGC_SCZ wave3 asn only                             | 0        | 0.90        | 0.00123         | 0.361(14004)        | 0.353(16757)         | 0.061        | 0.019        |     |
| PGC_SCZ afram only                                 | -        | 0.88        | 0.0602          | -(6152)             | 0.829(3918)          | 0.08         | 0.043        |     |
| PGC_SCZ latino only                                | -        | 0.91        | 0.0664          | -(1234)             | 0.462(3090)          | 0.096        | 0.052        |     |
| PGC_SCZ wave2 only                                 | 0        | 0.96        | 1.17e-05        | 0.339(34850)        | 0.327(44347)         | 0.052        | 0.012        |     |
| PGC_SCZ wave3 (excl. wave2)                        | 0        | 0.93        | 4.87e-06        | 0.471(39926)        | 0.434(56676)         | 0.051        | 0.011        |     |
| <b>PGC_SCZ wave3 (incl. wave2)</b>                 | <b>0</b> | <b>0.94</b> | <b>1.98e-10</b> | <b>0.419(74776)</b> | <b>0.393(101023)</b> | <b>0.051</b> | <b>0.008</b> |     |
| Decode – Replication                               | -        | 1.00        | 0.723           | 0.338(1979)         | 0.365(142627)        | -0.014       | 0.04         |     |
| <b>PGC_SCZ wave3 (incl. wave2 and replication)</b> | <b>0</b> | <b>0.97</b> | <b>8.89e-10</b> | <b>0.417(76755)</b> | <b>0.378(243650)</b> | <b>0.049</b> | <b>0.008</b> |     |

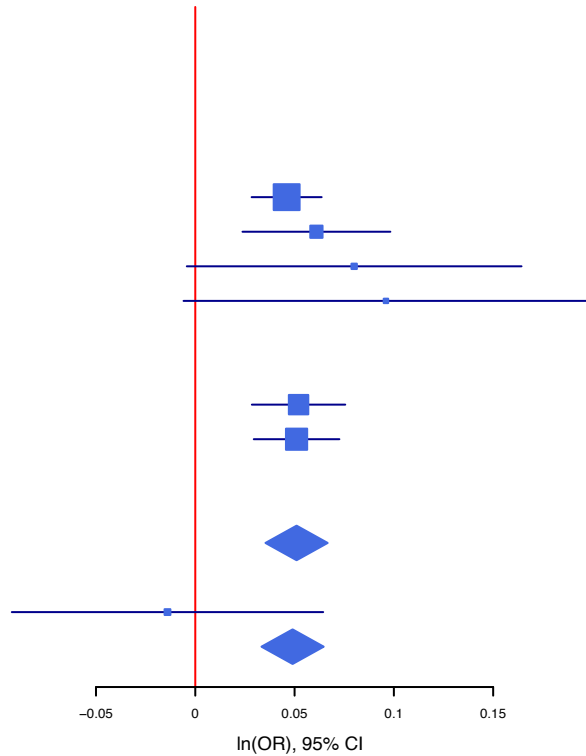

**rs10148671**                      **T/C**                      **14:29469373**  
 ---                                      het\_P:                      0.37    het\_I:                      0.0

|                                                    | <b>ngt</b> | <b>info</b> | <b>p_value</b>  | <b>f_ca(n)</b>      | <b>f_co(n)</b>       | <b>ln(OR)</b> | <b>STDerr</b> |
|----------------------------------------------------|------------|-------------|-----------------|---------------------|----------------------|---------------|---------------|
| PGC_SCZ wave3 eur only                             | 84         | 1.00        | 2.85e-07        | 0.336(53386)        | 0.348(77258)         | -0.047        | 0.009         |
| PGC_SCZ wave3 asn only                             | 12         | 0.98        | 0.0067          | 0.735(14004)        | 0.751(16757)         | -0.054        | 0.02          |
| PGC_SCZ afram only                                 | -          | 1.03        | 0.782           | -(6152)             | 0.733(3918)          | -0.009        | 0.033         |
| PGC_SCZ latino only                                | -          | 1.03        | 0.0752          | -(1234)             | 0.496(3090)          | -0.087        | 0.049         |
| PGC_SCZ wave2 only                                 | 47         | 1.00        | 0.000341        | 0.355(34850)        | 0.353(44347)         | -0.041        | 0.012         |
| PGC_SCZ wave3 (excl. wave2)                        | 49         | 1.00        | 2.15e-06        | 0.538(39926)        | 0.52(56676)          | -0.052        | 0.011         |
| <b>PGC_SCZ wave3 (incl. wave2)</b>                 | <b>96</b>  | <b>1.00</b> | <b>4.14e-09</b> | <b>0.466(74776)</b> | <b>0.456(101023)</b> | <b>-0.047</b> | <b>0.008</b>  |
| Decode – Replication                               | -          | 1.00        | 0.0934          | 0.352(1979)         | 0.369(142627)        | -0.065        | 0.039         |
| <b>PGC_SCZ wave3 (incl. wave2 and replication)</b> | <b>96</b>  | <b>1.00</b> | <b>8.94e-10</b> | <b>0.464(76755)</b> | <b>0.408(243650)</b> | <b>-0.047</b> | <b>0.008</b>  |

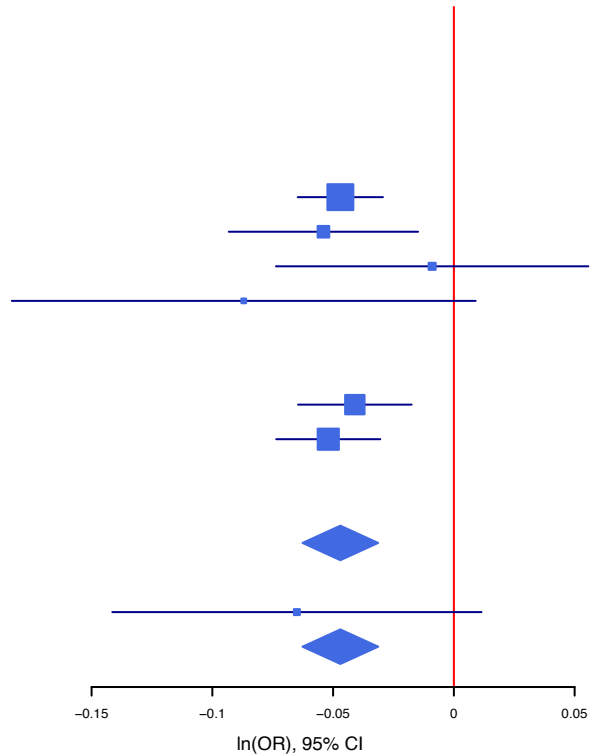

rs28454198                      G/C                      4:80204001  
 ---                                              het\_P:                      0.202    het\_I:                      37.4

|                                                    | ngt      | info        | p_value         | f_ca(n)             | f_co(n)              | ln(OR)       | STDerr       |
|----------------------------------------------------|----------|-------------|-----------------|---------------------|----------------------|--------------|--------------|
| PGC_SCZ wave3 eur only                             | 0        | 1.00        | 1.51e-07        | 0.504(53386)        | 0.492(77258)         | 0.045        | 0.009        |
| PGC_SCZ wave3 asn only                             | 0        | 0.92        | 0.00174         | 0.819(14004)        | 0.814(16757)         | 0.074        | 0.024        |
| PGC_SCZ afram only                                 | -        | 1.00        | 0.687           | -(6152)             | 0.632(3918)          | 0.012        | 0.03         |
| PGC_SCZ latino only                                | -        | 1.02        | 0.0205          | -(1234)             | 0.473(3090)          | 0.114        | 0.049        |
| PGC_SCZ wave2 only                                 | 0        | 1.00        | 9.11e-05        | 0.524(34850)        | 0.506(44347)         | 0.043        | 0.011        |
| PGC_SCZ wave3 (excl. wave2)                        | 0        | 0.98        | 1.2e-06         | 0.592(39926)        | 0.578(56676)         | 0.053        | 0.011        |
| <b>PGC_SCZ wave3 (incl. wave2)</b>                 | <b>0</b> | <b>0.99</b> | <b>5.97e-10</b> | <b>0.565(74776)</b> | <b>0.55(101023)</b>  | <b>0.048</b> | <b>0.008</b> |
| Decode – Replication                               | -        | 1.00        | 0.868           | 0.501(1979)         | 0.508(142627)        | 0.006        | 0.038        |
| <b>PGC_SCZ wave3 (incl. wave2 and replication)</b> | <b>0</b> | <b>0.99</b> | <b>9.56e-10</b> | <b>0.564(76755)</b> | <b>0.527(243650)</b> | <b>0.046</b> | <b>0.008</b> |

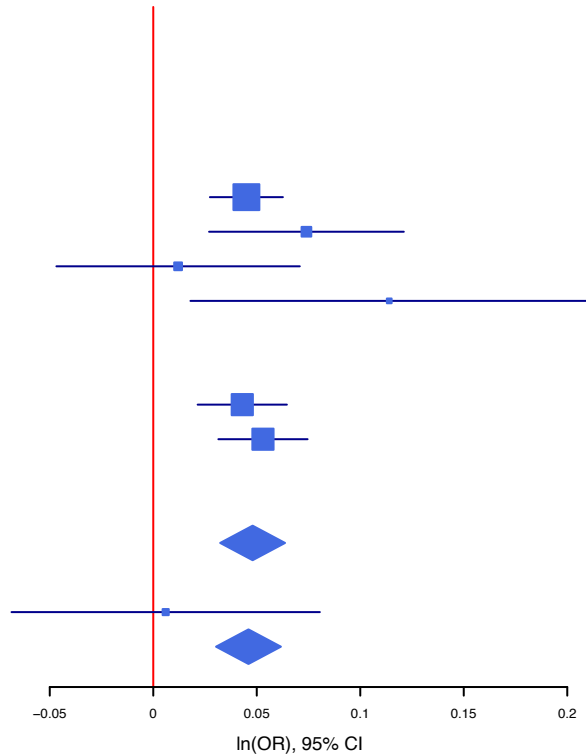



| rs1545660                                          | A/G      |             | 13:54451624     |                     | het_P:               | 0.221        | het_I:       | 33.7 |
|----------------------------------------------------|----------|-------------|-----------------|---------------------|----------------------|--------------|--------------|------|
|                                                    | ngt      | info        | p_value         | f_ca(n)             |                      |              |              |      |
| PGC_SCZ wave3 eur only                             | 0        | 1.00        | 2.39e-06        | 0.218(53386)        | 0.211(77258)         | 0.049        | 0.01         |      |
| PGC_SCZ wave3 asn only                             | 0        | 0.99        | 0.122           | 0.193(14004)        | 0.188(16757)         | 0.034        | 0.022        |      |
| PGC_SCZ afram only                                 | -        | 0.98        | 0.00346         | -(6152)             | 0.643(3918)          | 0.091        | 0.031        |      |
| PGC_SCZ latino only                                | -        | 0.99        | 0.0567          | -(1234)             | 0.22(3090)           | 0.114        | 0.06         |      |
| PGC_SCZ wave2 only                                 | 0        | 1.00        | 0.00119         | 0.216(34850)        | 0.208(44347)         | 0.043        | 0.013        |      |
| PGC_SCZ wave3 (excl. wave2)                        | 0        | 0.99        | 1.12e-06        | 0.298(39926)        | 0.274(56676)         | 0.059        | 0.012        |      |
| <b>PGC_SCZ wave3 (incl. wave2)</b>                 | <b>0</b> | <b>1.00</b> | <b>7.36e-09</b> | <b>0.266(74776)</b> | <b>0.249(101023)</b> | <b>0.052</b> | <b>0.009</b> |      |
| Decode – Replication                               | -        | 1.00        | 0.0249          | 0.215(1979)         | 0.239(142627)        | 0.101        | 0.045        |      |
| <b>PGC_SCZ wave3 (incl. wave2 and replication)</b> | <b>0</b> | <b>1.00</b> | <b>9.82e-10</b> | <b>0.265(76755)</b> | <b>0.244(243650)</b> | <b>0.053</b> | <b>0.009</b> |      |

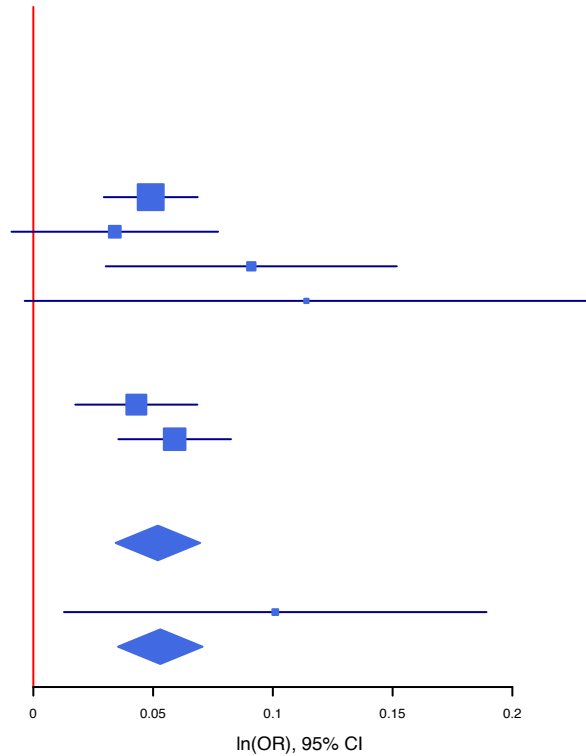

**rs61789527**                      **G/A**                      **1:97146047**  
 ++-                      het\_P:                      0.256    het\_I:                      26.7

|                        | ngt | info | p_value  | f_ca(n)      | f_co(n)      | ln(OR) | STDerr |
|------------------------|-----|------|----------|--------------|--------------|--------|--------|
| PGC_SCZ wave3 eur only | 0   | 1.00 | 4.83e-06 | 0.812(53386) | 0.82(77258)  | -0.051 | 0.011  |
| PGC_SCZ wave3 asn only | 0   | 1.00 | 0.000345 | 0.77(14004)  | 0.784(16757) | -0.073 | 0.02   |
| PGC_SCZ afram only     | -   | 0.99 | 0.0296   | -(6152)      | 0.741(3918)  | -0.073 | 0.034  |
| PGC_SCZ latino only    | -   | 0.98 | 0.43     | -(1234)      | 0.857(3090)  | 0.056  | 0.071  |

|                             |   |      |          |              |              |        |       |
|-----------------------------|---|------|----------|--------------|--------------|--------|-------|
| PGC_SCZ wave2 only          | 0 | 1.00 | 0.000165 | 0.81(34850)  | 0.817(44347) | -0.052 | 0.014 |
| PGC_SCZ wave3 (excl. wave2) | 0 | 0.99 | 3.91e-06 | 0.798(39926) | 0.807(56676) | -0.057 | 0.012 |

**PGC\_SCZ wave3 (incl. wave2)**                      **0**    **1.00**    **2.28e-09**    **0.803(74776)**    **0.81(101023)**    **-0.055**    **0.009**

Decode – Replication                      -    1.00    0.248    0.785(1979)    0.791(142627)    -0.056    0.048

**PGC\_SCZ wave3 (incl. wave2 and replication)**                      **0**    **1.00**    **9.99e-10**    **0.803(76755)**    **0.8(243650)**    **-0.055**    **0.009**

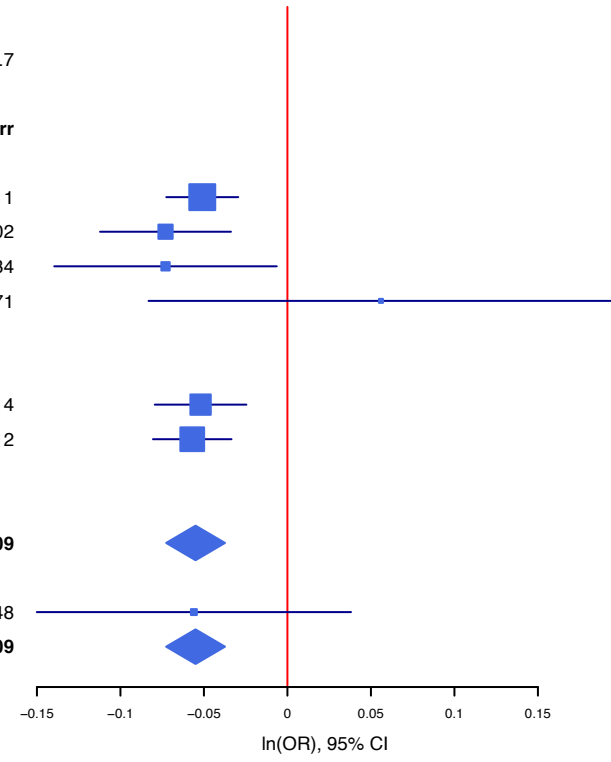

| rs252812                                           | A/G      |             | 5:106735490     |                     | het_P:               | 0.001        | het_I:       | 85.8 |
|----------------------------------------------------|----------|-------------|-----------------|---------------------|----------------------|--------------|--------------|------|
|                                                    | ngt      | info        | p_value         | f_ca(n)             |                      |              |              |      |
| PGC_SCZ wave3 eur only                             | 0        | 1.00        | 5.39e-07        | 0.192(53386)        | 0.181(77258)         | 0.055        | 0.011        |      |
| PGC_SCZ wave3 asn only                             | 0        | 0.96        | 0.00669         | 0.471(14004)        | 0.47(16757)          | 0.047        | 0.018        |      |
| PGC_SCZ afram only                                 | -        | 0.91        | 0.0826          | -(6152)             | 0.07(3918)           | -0.104       | 0.06         |      |
| PGC_SCZ latino only                                | -        | 0.96        | 0.0004          | -(1234)             | 0.194(3090)          | 0.221        | 0.062        |      |
| PGC_SCZ wave2 only                                 | 0        | 1.00        | 2.52e-05        | 0.204(34850)        | 0.185(44347)         | 0.058        | 0.014        |      |
| PGC_SCZ wave3 (excl. wave2)                        | 0        | 0.97        | 5.54e-05        | 0.232(39926)        | 0.232(56676)         | 0.049        | 0.012        |      |
| <b>PGC_SCZ wave3 (incl. wave2)</b>                 | <b>0</b> | <b>0.98</b> | <b>5.77e-09</b> | <b>0.222(74776)</b> | <b>0.213(101023)</b> | <b>0.053</b> | <b>0.009</b> |      |
| Decode – Replication                               | -        | 1.00        | 0.0398          | 0.202(1979)         | 0.188(142627)        | 0.098        | 0.048        |      |
| <b>PGC_SCZ wave3 (incl. wave2 and replication)</b> | <b>0</b> | <b>0.99</b> | <b>1.1e-09</b>  | <b>0.222(76755)</b> | <b>0.199(243650)</b> | <b>0.054</b> | <b>0.009</b> |      |

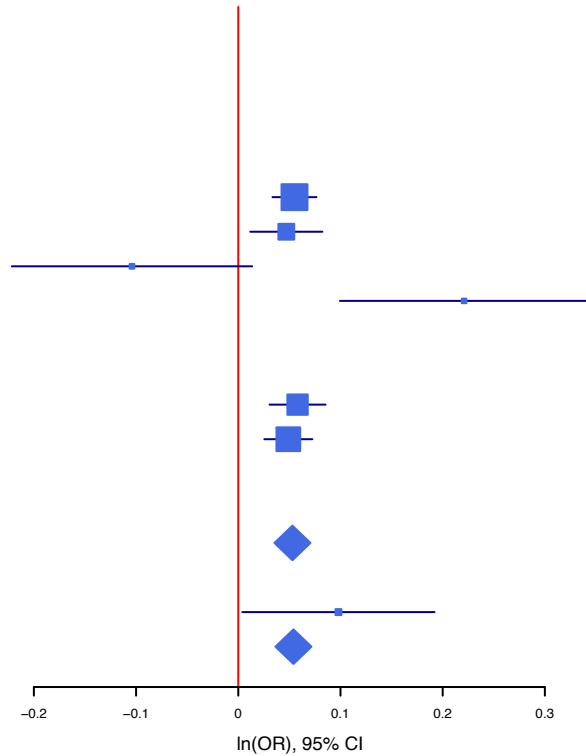

rs6925079                      T/C                      6:64946311  
 ---                                      het\_P:                      0.346    het\_I:                      5.7

|                                                    | ngt      | info        | p_value         | f_ca(n)             | f_co(n)              | ln(OR)        | STDerr       |
|----------------------------------------------------|----------|-------------|-----------------|---------------------|----------------------|---------------|--------------|
| PGC_SCZ wave3 eur only                             | 0        | 0.99        | 3.98e-05        | 0.668(53386)        | 0.674(77258)         | -0.038        | 0.009        |
| PGC_SCZ wave3 asn only                             | 0        | 0.95        | 5.64e-05        | 0.486(14004)        | 0.5(16757)           | -0.07         | 0.018        |
| PGC_SCZ afram only                                 | -        | 0.98        | 0.137           | -(6152)             | 0.619(3918)          | -0.045        | 0.03         |
| PGC_SCZ latino only                                | -        | 1.02        | 0.0192          | -(1234)             | 0.661(3090)          | -0.121        | 0.052        |
| PGC_SCZ wave2 only                                 | 0        | 0.99        | 0.000587        | 0.658(34850)        | 0.671(44347)         | -0.04         | 0.012        |
| PGC_SCZ wave3 (excl. wave2)                        | 0        | 0.98        | 6.43e-07        | 0.616(39926)        | 0.625(56676)         | -0.052        | 0.01         |
| <b>PGC_SCZ wave3 (incl. wave2)</b>                 | <b>0</b> | <b>0.99</b> | <b>1.81e-09</b> | <b>0.632(74776)</b> | <b>0.642(101023)</b> | <b>-0.047</b> | <b>0.008</b> |
| Decode – Replication                               | -        | 1.00        | 0.403           | 0.682(1979)         | 0.695(142627)        | -0.033        | 0.04         |
| <b>PGC_SCZ wave3 (incl. wave2 and replication)</b> | <b>0</b> | <b>0.99</b> | <b>1.14e-09</b> | <b>0.633(76755)</b> | <b>0.671(243650)</b> | <b>-0.046</b> | <b>0.008</b> |

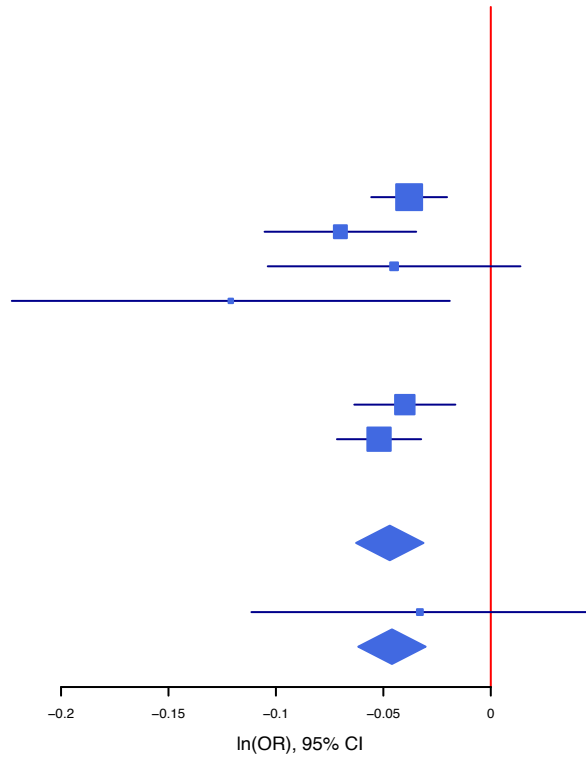

rs10906984                    **A/C**                    **15:83366296**  
 +++                    het\_P:                    0.665    het\_I:                    0.0

|                                                    | ngt       | info        | p_value         | f_ca(n)             | f_co(n)              | ln(OR)       | STDerr       |
|----------------------------------------------------|-----------|-------------|-----------------|---------------------|----------------------|--------------|--------------|
| PGC_SCZ wave3 eur only                             | 40        | 1.00        | 9.1e-11         | 0.38(53386)         | 0.367(77258)         | 0.058        | 0.009        |
| PGC_SCZ wave3 asn only                             | 5         | 0.99        | 0.304           | 0.476(14004)        | 0.47(16757)          | 0.018        | 0.017        |
| PGC_SCZ afram only                                 | -         | 0.94        | 0.233           | -(6152)             | 0.492(3918)          | 0.036        | 0.03         |
| PGC_SCZ latino only                                | -         | 0.98        | 0.0831          | -(1234)             | 0.356(3090)          | 0.09         | 0.052        |
| PGC_SCZ wave2 only                                 | 31        | 1.00        | 1.06e-07        | 0.383(34850)        | 0.367(44347)         | 0.059        | 0.011        |
| PGC_SCZ wave3 (excl. wave2)                        | 14        | 0.98        | 7.66e-05        | 0.421(39926)        | 0.408(56676)         | 0.04         | 0.01         |
| <b>PGC_SCZ wave3 (incl. wave2)</b>                 | <b>45</b> | <b>0.99</b> | <b>8.03e-11</b> | <b>0.406(74776)</b> | <b>0.392(101023)</b> | <b>0.049</b> | <b>0.008</b> |
| Decode – Replication                               | -         | 1.00        | 0.165           | 0.384(1979)         | 0.403(142627)        | -0.055       | 0.04         |
| <b>PGC_SCZ wave3 (incl. wave2 and replication)</b> | <b>45</b> | <b>0.99</b> | <b>1.16e-09</b> | <b>0.406(76755)</b> | <b>0.398(243650)</b> | <b>0.045</b> | <b>0.008</b> |

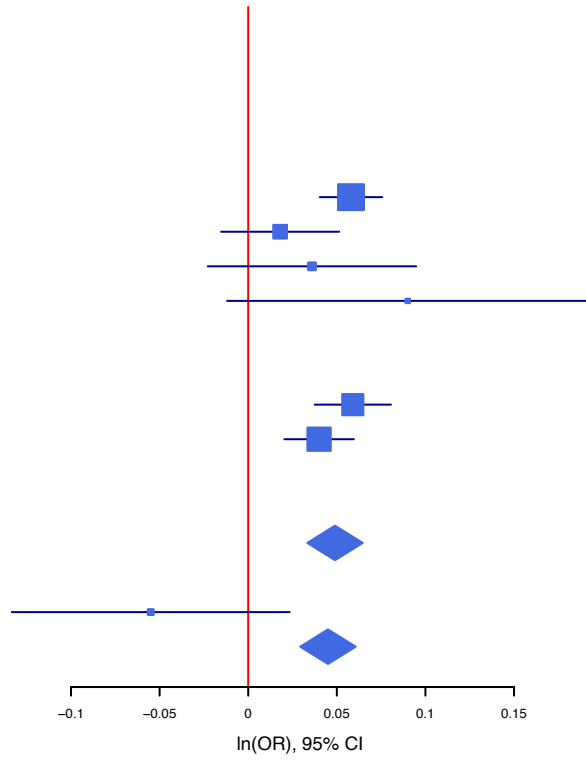

rs10985811

T/C  
---  
9:101070487  
het\_P: 0.652 het\_I: 0.0

|                                                    | ngt       | info        | p_value         | f_ca(n)             | f_co(n)              | ln(OR)        | STDerr       |
|----------------------------------------------------|-----------|-------------|-----------------|---------------------|----------------------|---------------|--------------|
| PGC_SCZ wave3 eur only                             | 23        | 1.00        | 3.61e-08        | 0.832(53386)        | 0.842(77258)         | -0.064        | 0.012        |
| PGC_SCZ wave3 asn only                             | 4         | 0.94        | 0.082           | 0.622(14004)        | 0.625(16757)         | -0.031        | 0.018        |
| PGC_SCZ afram only                                 | -         | 1.00        | 0.0886          | -(6152)             | 0.756(3918)          | -0.058        | 0.034        |
| PGC_SCZ latino only                                | -         | 1.01        | 0.966           | -(1234)             | 0.726(3090)          | -0.002        | 0.056        |
| PGC_SCZ wave2 only                                 | 17        | 1.00        | 2.71e-05        | 0.827(34850)        | 0.843(44347)         | -0.062        | 0.015        |
| PGC_SCZ wave3 (excl. wave2)                        | 10        | 0.99        | 6.27e-05        | 0.745(39926)        | 0.759(56676)         | -0.048        | 0.012        |
| <b>PGC_SCZ wave3 (incl. wave2)</b>                 | <b>27</b> | <b>0.99</b> | <b>9.33e-09</b> | <b>0.777(74776)</b> | <b>0.791(101023)</b> | <b>-0.053</b> | <b>0.009</b> |
| Decode – Replication                               | -         | 1.00        | 0.0128          | 0.841(1979)         | 0.826(142627)        | -0.128        | 0.051        |
| <b>PGC_SCZ wave3 (incl. wave2 and replication)</b> | <b>27</b> | <b>1.00</b> | <b>1.19e-09</b> | <b>0.778(76755)</b> | <b>0.811(243650)</b> | <b>-0.056</b> | <b>0.009</b> |

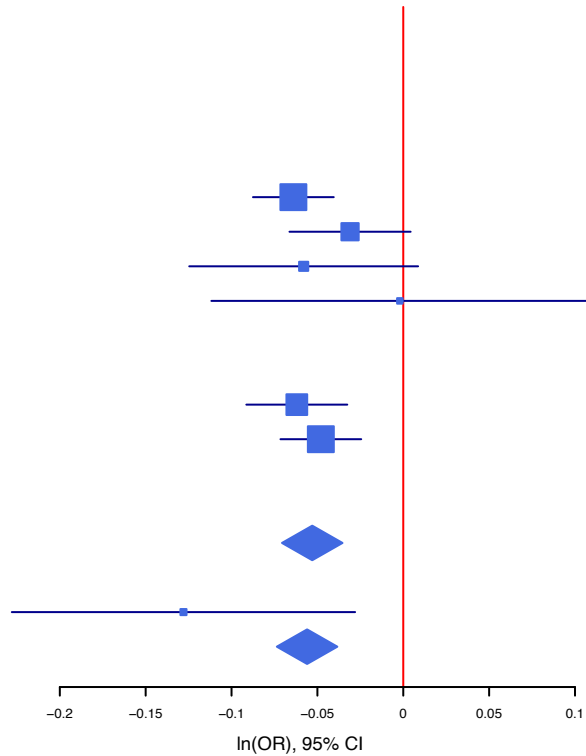

| rs9896486                                          | T/G      |             | 17:1252843      |                     | het_P:               | 0.62         | het_I:       | 0.0 |
|----------------------------------------------------|----------|-------------|-----------------|---------------------|----------------------|--------------|--------------|-----|
|                                                    | ngt      | info        | p_value         | f_ca(n)             |                      |              |              |     |
| PGC_SCZ wave3 eur only                             | 1        | 0.99        | 1.79e-05        | 0.41(53386)         | 0.4(77258)           | 0.038        | 0.009        |     |
| PGC_SCZ wave3 asn only                             | 0        | 0.97        | 1.19e-05        | 0.601(14004)        | 0.584(16757)         | 0.077        | 0.018        |     |
| PGC_SCZ afram only                                 | -        | 0.97        | 0.758           | -(6152)             | 0.204(3918)          | 0.011        | 0.037        |     |
| PGC_SCZ latino only                                | -        | 1.01        | 0.255           | -(1234)             | 0.23(3090)           | 0.066        | 0.058        |     |
| PGC_SCZ wave2 only                                 | 0        | 0.99        | 0.00012         | 0.423(34850)        | 0.403(44347)         | 0.043        | 0.011        |     |
| PGC_SCZ wave3 (excl. wave2)                        | 1        | 0.98        | 1.12e-05        | 0.375(39926)        | 0.387(56676)         | 0.046        | 0.01         |     |
| <b>PGC_SCZ wave3 (incl. wave2)</b>                 | <b>1</b> | <b>0.99</b> | <b>6.25e-09</b> | <b>0.394(74776)</b> | <b>0.393(101023)</b> | <b>0.044</b> | <b>0.008</b> |     |
| Decode – Replication                               | -        | 1.00        | 0.0365          | 0.409(1979)         | 0.406(142627)        | 0.081        | 0.038        |     |
| <b>PGC_SCZ wave3 (incl. wave2 and replication)</b> | <b>1</b> | <b>0.99</b> | <b>1.23e-09</b> | <b>0.394(76755)</b> | <b>0.4(243650)</b>   | <b>0.046</b> | <b>0.008</b> |     |

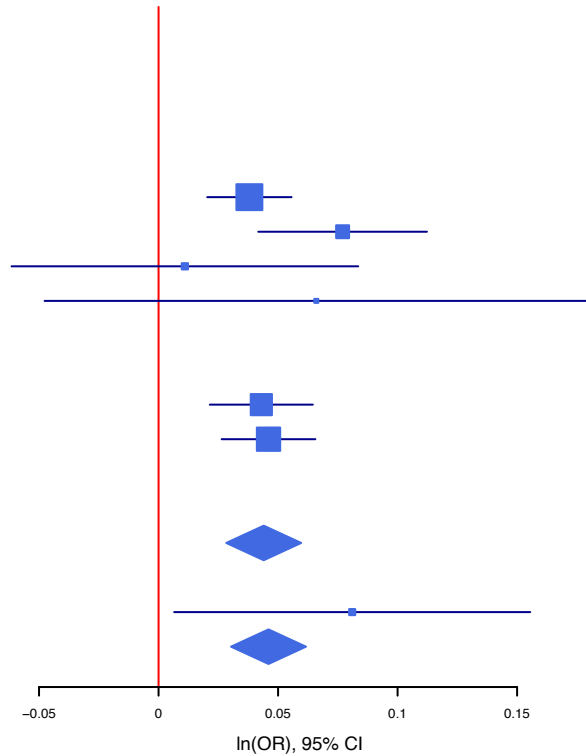

| rs1856507                                          | C/A      |             | 6:73157926      |                     | het_P:               | 0.053        | het_I:       | 66.0 |
|----------------------------------------------------|----------|-------------|-----------------|---------------------|----------------------|--------------|--------------|------|
|                                                    | ngt      | info        | p_value         | f_ca(n)             |                      |              |              |      |
| PGC_SCZ wave3 eur only                             | 0        | 0.98        | 1.56e-10        | 0.635(53386)        | 0.615(77258)         | 0.058        | 0.009        |      |
| PGC_SCZ wave3 asn only                             | 0        | 0.97        | 0.187           | 0.599(14004)        | 0.59(16757)          | 0.023        | 0.018        |      |
| PGC_SCZ afram only                                 | -        | 0.98        | 0.167           | -(6152)             | 0.899(3918)          | -0.069       | 0.05         |      |
| PGC_SCZ latino only                                | -        | 0.99        | 0.82            | -(1234)             | 0.779(3090)          | 0.014        | 0.06         |      |
| PGC_SCZ wave2 only                                 | 0        | 0.99        | 9.5e-07         | 0.625(34850)        | 0.607(44347)         | 0.055        | 0.011        |      |
| PGC_SCZ wave3 (excl. wave2)                        | 0        | 0.97        | 0.000354        | 0.713(39926)        | 0.682(56676)         | 0.039        | 0.011        |      |
| <b>PGC_SCZ wave3 (incl. wave2)</b>                 | <b>0</b> | <b>0.98</b> | <b>2.23e-09</b> | <b>0.678(74776)</b> | <b>0.653(101023)</b> | <b>0.047</b> | <b>0.008</b> |      |
| Decode – Replication                               | -        | 1.00        | 0.327           | 0.629(1979)         | 0.625(142627)        | 0.038        | 0.038        |      |
| <b>PGC_SCZ wave3 (incl. wave2 and replication)</b> | <b>0</b> | <b>0.99</b> | <b>1.24e-09</b> | <b>0.677(76755)</b> | <b>0.638(243650)</b> | <b>0.046</b> | <b>0.008</b> |      |

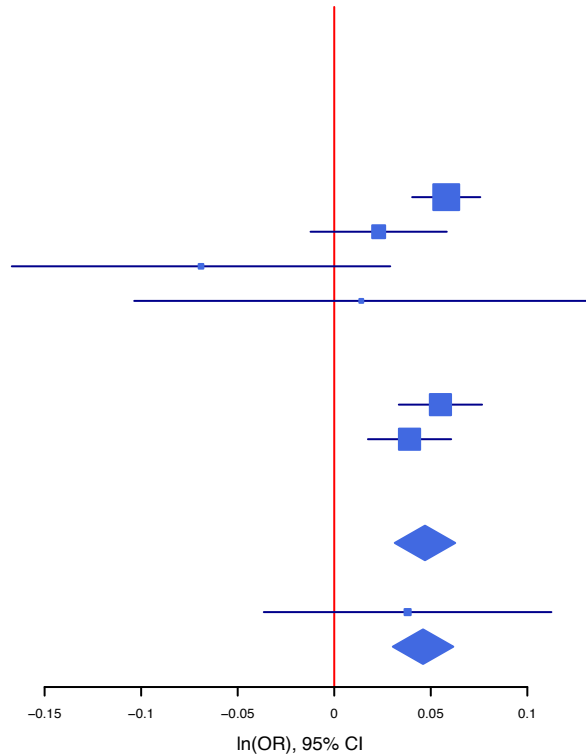



rs2119242                    G/A                    10:21344773  
 +++                    het\_P:                    0.547    het\_I:                    0.0

|                                                    | ngt       | info        | p_value         | f_ca(n)             | f_co(n)              | ln(OR)        | STDerr      |
|----------------------------------------------------|-----------|-------------|-----------------|---------------------|----------------------|---------------|-------------|
| PGC_SCZ wave3 eur only                             | 14        | 0.95        | 4.31e-06        | 0.846(53386)        | 0.854(77258)         | -0.057        | 0.012       |
| PGC_SCZ wave3 asn only                             | 3         | 0.94        | 0.000719        | 0.762(14004)        | 0.768(16757)         | -0.07         | 0.021       |
| PGC_SCZ afram only                                 | -         | 0.91        | 0.318           | -(6152)             | 0.949(3918)          | -0.07         | 0.07        |
| PGC_SCZ latino only                                | -         | 1.00        | 0.0411          | -(1234)             | 0.822(3090)          | -0.131        | 0.064       |
| PGC_SCZ wave2 only                                 | 14        | 0.98        | 0.0018          | 0.841(34850)        | 0.85(44347)          | -0.047        | 0.015       |
| PGC_SCZ wave3 (excl. wave2)                        | 3         | 0.93        | 1.04e-07        | 0.843(39926)        | 0.846(56676)         | -0.075        | 0.014       |
| <b>PGC_SCZ wave3 (incl. wave2)</b>                 | <b>17</b> | <b>0.95</b> | <b>1.77e-09</b> | <b>0.843(74776)</b> | <b>0.848(101023)</b> | <b>-0.062</b> | <b>0.01</b> |
| Decode – Replication                               | -         | 1.00        | 0.47            | 0.838(1979)         | 0.843(142627)        | -0.038        | 0.052       |
| <b>PGC_SCZ wave3 (incl. wave2 and replication)</b> | <b>17</b> | <b>0.98</b> | <b>1.24e-09</b> | <b>0.843(76755)</b> | <b>0.845(243650)</b> | <b>-0.061</b> | <b>0.01</b> |

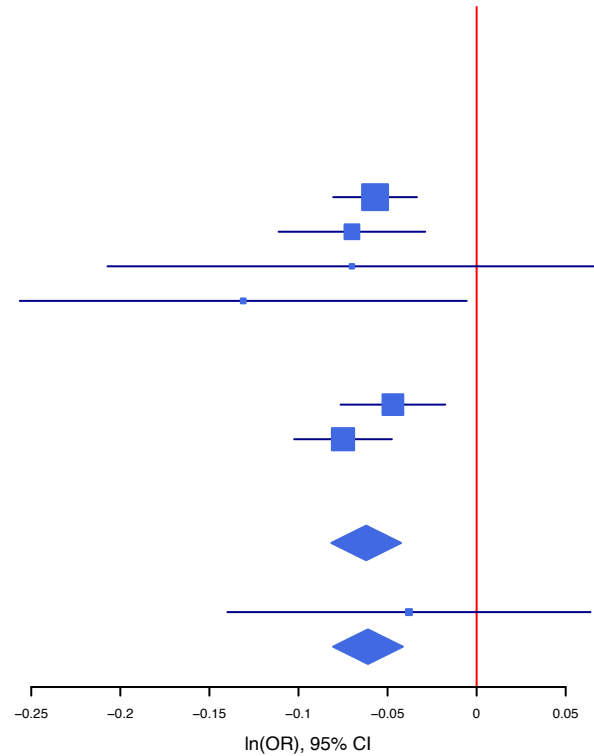

| rs1589726                                          | C/T      |             | 7:79348201      |                     | het_P:               | 0.554        | het_I:       | 0.0 |
|----------------------------------------------------|----------|-------------|-----------------|---------------------|----------------------|--------------|--------------|-----|
|                                                    | ngt      | info        | p_value         | f_ca(n)             |                      |              |              |     |
| PGC_SCZ wave3 eur only                             | 0        | 0.99        | 1.07e-07        | 0.092(53386)        | 0.086(77258)         | 0.081        | 0.015        |     |
| PGC_SCZ wave3 asn only                             | 0        | 0.91        | 0.0356          | 0.088(14004)        | 0.085(16757)         | 0.066        | 0.032        |     |
| PGC_SCZ afram only                                 | -        | 0.97        | 0.0798          | -(6152)             | 0.303(3918)          | 0.057        | 0.032        |     |
| PGC_SCZ latino only                                | -        | 0.97        | 0.895           | -(1234)             | 0.074(3090)          | -0.013       | 0.095        |     |
| PGC_SCZ wave2 only                                 | 0        | 0.99        | 0.0022          | 0.089(34850)        | 0.085(44347)         | 0.059        | 0.019        |     |
| PGC_SCZ wave3 (excl. wave2)                        | 0        | 0.97        | 3.5e-07         | 0.131(39926)        | 0.117(56676)         | 0.083        | 0.016        |     |
| <b>PGC_SCZ wave3 (incl. wave2)</b>                 | <b>0</b> | <b>0.98</b> | <b>4.88e-09</b> | <b>0.115(74776)</b> | <b>0.105(101023)</b> | <b>0.073</b> | <b>0.012</b> |     |
| Decode – Replication                               | -        | 1.00        | 0.0902          | 0.084(1979)         | 0.094(142627)        | 0.112        | 0.066        |     |
| <b>PGC_SCZ wave3 (incl. wave2 and replication)</b> | <b>0</b> | <b>0.99</b> | <b>1.29e-09</b> | <b>0.114(76755)</b> | <b>0.099(243650)</b> | <b>0.075</b> | <b>0.012</b> |     |

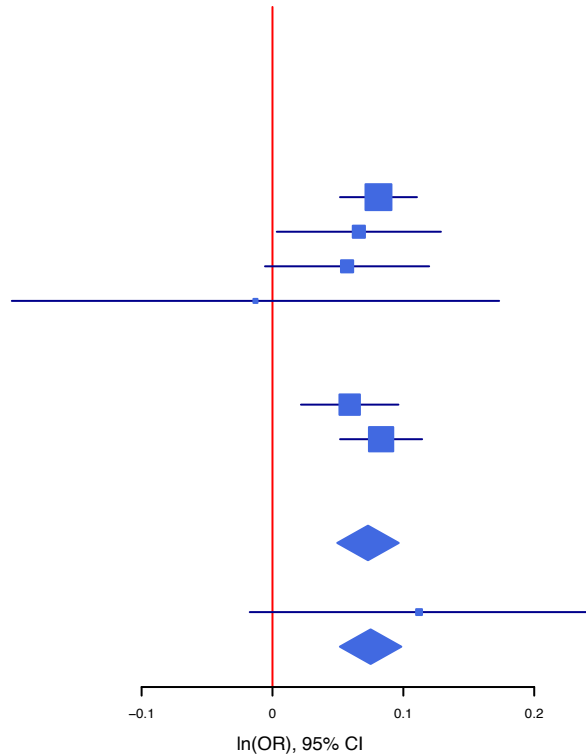

rs578470

T/C

12:50463325

---

het\_P:

0.88

het\_I:

0.0

ngt info p\_value f\_ca(n) f\_co(n) ln(OR) STDerr

PGC\_SCZ wave3 eur only 0 0.98 8.1e-07 0.564(53386) 0.575(77258) -0.043 0.009  
PGC\_SCZ wave3 asn only 0 0.89 0.00478 0.84(14004) 0.852(16757) -0.071 0.025  
PGC\_SCZ afram only - 0.97 0.129 -(6152) 0.672(3918) -0.048 0.032  
PGC\_SCZ latino only - 1.00 0.7 -(1234) 0.645(3090) -0.02 0.052

PGC\_SCZ wave2 only 0 0.99 4.17e-05 0.578(34850) 0.579(44347) -0.045 0.011  
PGC\_SCZ wave3 (excl. wave2) 0 0.96 4.61e-05 0.664(39926) 0.663(56676) -0.046 0.011

**PGC\_SCZ wave3 (incl. wave2) 0 0.97 8.42e-09 0.63(74776) 0.631(101023) -0.046 0.008**

Decode - Replication - 1.00 0.0471 0.564(1979) 0.556(142627) -0.075 0.038

**PGC\_SCZ wave3 (incl. wave2 and replication) 0 0.99 1.29e-09 0.629(76755) 0.589(243650) -0.047 0.008**

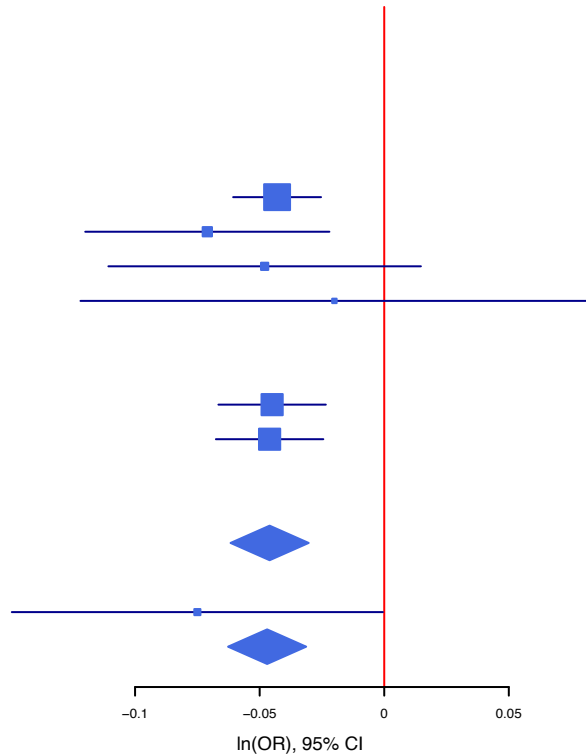

| rs12442456                                         | G/T      |             | 15:78751962     |                     | het_P:               | 0.528        | het_I:       | 0.0 |
|----------------------------------------------------|----------|-------------|-----------------|---------------------|----------------------|--------------|--------------|-----|
|                                                    | ngt      | info        | p_value         | f_ca(n)             |                      |              |              |     |
| PGC_SCZ wave3 eur only                             | 6        | 0.92        | 1.3e-08         | 0.864(53386)        | 0.857(77258)         | 0.074        | 0.013        |     |
| PGC_SCZ wave3 asn only                             | 0        | 0.85        | 0.13            | 0.789(14004)        | 0.787(16757)         | 0.034        | 0.022        |     |
| PGC_SCZ afram only                                 | -        | 0.89        | 0.341           | -(6152)             | 0.917(3918)          | 0.053        | 0.056        |     |
| PGC_SCZ latino only                                | -        | 0.93        | 0.0243          | -(1234)             | 0.675(3090)          | 0.128        | 0.057        |     |
| PGC_SCZ wave2 only                                 | 0        | 0.94        | 7.01e-07        | 0.858(34850)        | 0.851(44347)         | 0.08         | 0.016        |     |
| PGC_SCZ wave3 (excl. wave2)                        | 6        | 0.89        | 0.000206        | 0.821(39926)        | 0.825(56676)         | 0.054        | 0.015        |     |
| <b>PGC_SCZ wave3 (incl. wave2)</b>                 | <b>6</b> | <b>0.91</b> | <b>1.15e-09</b> | <b>0.835(74776)</b> | <b>0.835(101023)</b> | <b>0.066</b> | <b>0.011</b> |     |
| Decode – Replication                               | -        | 1.00        | 0.601           | 0.844(1979)         | 0.863(142627)        | 0.028        | 0.054        |     |
| <b>PGC_SCZ wave3 (incl. wave2 and replication)</b> | <b>6</b> | <b>0.96</b> | <b>1.38e-09</b> | <b>0.835(76755)</b> | <b>0.851(243650)</b> | <b>0.064</b> | <b>0.011</b> |     |

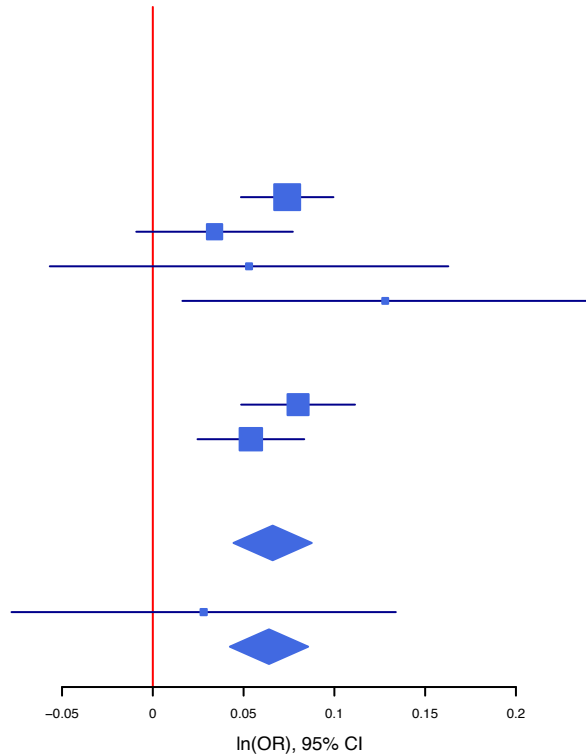

rs72723227

G/A  
---  
5:7245664  
het\_P: 0.369 het\_I: 0.0

|                        | ngt | info | p_value  | f_ca(n)      | f_co(n)      | ln(OR) | STDerr |
|------------------------|-----|------|----------|--------------|--------------|--------|--------|
| PGC_SCZ wave3 eur only | 0   | 0.99 | 2.52e-07 | 0.682(53386) | 0.673(77258) | 0.048  | 0.009  |
| PGC_SCZ wave3 asn only | 0   | 0.97 | 0.0053   | 0.577(14004) | 0.568(16757) | 0.049  | 0.017  |
| PGC_SCZ afram only     | -   | 0.95 | 0.0404   | -(6152)      | 0.922(3918)  | 0.116  | 0.056  |
| PGC_SCZ latino only    | -   | 0.99 | 0.0964   | -(1234)      | 0.716(3090)  | 0.092  | 0.056  |

|                             |   |      |          |              |              |       |       |
|-----------------------------|---|------|----------|--------------|--------------|-------|-------|
| PGC_SCZ wave2 only          | 0 | 0.98 | 0.000315 | 0.676(34850) | 0.673(44347) | 0.042 | 0.012 |
| PGC_SCZ wave3 (excl. wave2) | 0 | 0.98 | 1.8e-07  | 0.713(39926) | 0.693(56676) | 0.057 | 0.011 |

**PGC\_SCZ wave3 (incl. wave2)**      **0**   **0.98**   **3.76e-10**   **0.698(74776)**   **0.685(101023)**   **0.05**   **0.008**

Decode – Replication      -   1.00   0.548   0.668(1979)   0.664(142627)   -0.024   0.04

**PGC\_SCZ wave3 (incl. wave2 and replication)**      **0**   **0.99**   **1.44e-09**   **0.697(76755)**   **0.673(243650)**   **0.048**   **0.008**

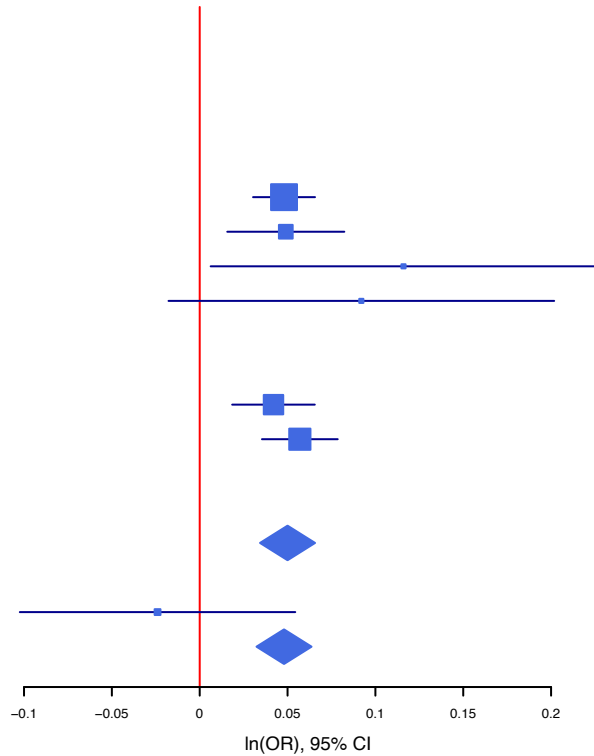



rs62183855                    A/C                    2:172956449  
 +++                    het\_P:                    0.55    het\_I:                    0.0

|                                                    | ngt      | info        | p_value         | f_ca(n)             | f_co(n)              | ln(OR)       | STDerr      |
|----------------------------------------------------|----------|-------------|-----------------|---------------------|----------------------|--------------|-------------|
| PGC_SCZ wave3 eur only                             | 0        | 0.98        | 2.66e-09        | 0.814(53386)        | 0.808(77258)         | 0.066        | 0.011       |
| PGC_SCZ wave3 asn only                             | 0        | 0.90        | 0.706           | 0.921(14004)        | 0.92(16757)          | -0.013       | 0.033       |
| PGC_SCZ afram only                                 | -        | 0.96        | 0.117           | -(6152)             | 0.926(3918)          | 0.089        | 0.057       |
| PGC_SCZ latino only                                | -        | 1.02        | 0.0448          | -(1234)             | 0.743(3090)          | 0.115        | 0.057       |
| PGC_SCZ wave2 only                                 | 0        | 0.97        | 3.45e-05        | 0.823(34850)        | 0.817(44347)         | 0.059        | 0.014       |
| PGC_SCZ wave3 (excl. wave2)                        | 0        | 0.97        | 1.54e-05        | 0.844(39926)        | 0.837(56676)         | 0.063        | 0.014       |
| <b>PGC_SCZ wave3 (incl. wave2)</b>                 | <b>0</b> | <b>0.97</b> | <b>1.97e-09</b> | <b>0.836(74776)</b> | <b>0.829(101023)</b> | <b>0.061</b> | <b>0.01</b> |
| Decode – Replication                               | -        | 1.00        | 0.4             | 0.793(1979)         | 0.8(142627)          | 0.044        | 0.052       |
| <b>PGC_SCZ wave3 (incl. wave2 and replication)</b> | <b>0</b> | <b>0.99</b> | <b>1.64e-09</b> | <b>0.835(76755)</b> | <b>0.813(243650)</b> | <b>0.06</b>  | <b>0.01</b> |

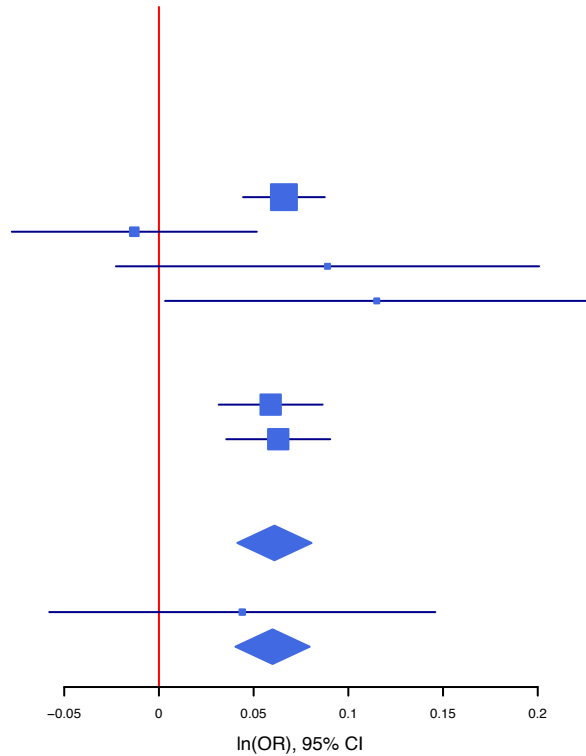

**rs9322058**                      **T/C**                      **6:146736408**  
 +-                      het\_P:                      0.026    het\_I:                      72.5

|                                                    | ngt      | info        | p_value         | f_ca(n)             | f_co(n)              | ln(OR)        | STDerr       |
|----------------------------------------------------|----------|-------------|-----------------|---------------------|----------------------|---------------|--------------|
| PGC_SCZ wave3 eur only                             | 8        | 0.99        | 7.5e-07         | 0.462(53386)        | 0.477(77258)         | -0.043        | 0.009        |
| PGC_SCZ wave3 asn only                             | 1        | 0.96        | 0.00066         | 0.438(14004)        | 0.447(16757)         | -0.06         | 0.018        |
| PGC_SCZ afram only                                 | -        | 0.98        | 0.17            | -(6152)             | 0.12(3918)           | 0.065         | 0.047        |
| PGC_SCZ latino only                                | -        | 1.01        | 0.024           | -(1234)             | 0.548(3090)          | -0.113        | 0.05         |
| PGC_SCZ wave2 only                                 | 7        | 1.00        | 0.00241         | 0.468(34850)        | 0.48(44347)          | -0.033        | 0.011        |
| PGC_SCZ wave3 (excl. wave2)                        | 2        | 0.98        | 1.1e-07         | 0.401(39926)        | 0.425(56676)         | -0.056        | 0.011        |
| <b>PGC_SCZ wave3 (incl. wave2)</b>                 | <b>9</b> | <b>0.99</b> | <b>3.99e-09</b> | <b>0.427(74776)</b> | <b>0.446(101023)</b> | <b>-0.045</b> | <b>0.008</b> |
| Decode - Replication                               | -        | 1.00        | 0.208           | 0.458(1979)         | 0.447(142627)        | -0.047        | 0.037        |
| <b>PGC_SCZ wave3 (incl. wave2 and replication)</b> | <b>9</b> | <b>1.00</b> | <b>1.67e-09</b> | <b>0.428(76755)</b> | <b>0.446(243650)</b> | <b>-0.045</b> | <b>0.007</b> |

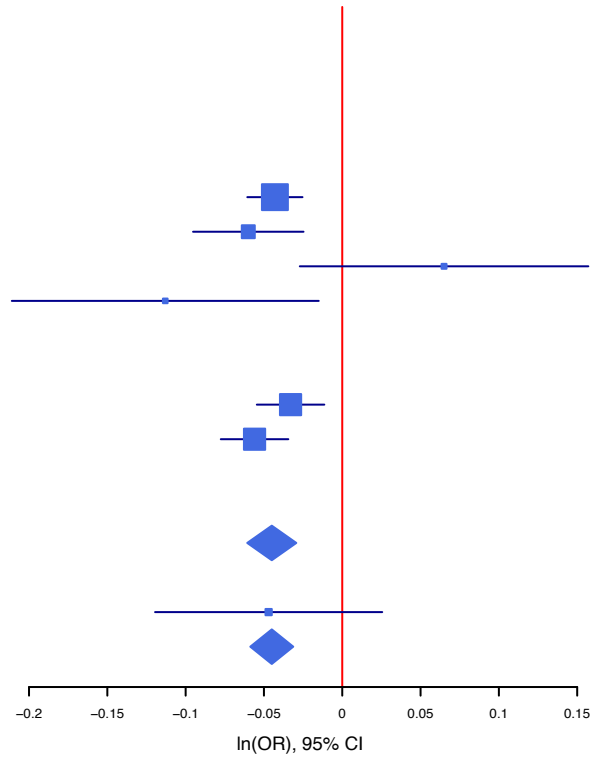



| rs2686386                                          | C/T       |             | 12:121639657    |                     | het_P:               | 0.039        | het_I:       | 69.1 |
|----------------------------------------------------|-----------|-------------|-----------------|---------------------|----------------------|--------------|--------------|------|
|                                                    | +-        |             |                 |                     |                      |              |              |      |
|                                                    | ngt       | info        | p_value         | f_ca(n)             | f_co(n)              | ln(OR)       | STDerr       |      |
| PGC_SCZ wave3 eur only                             | 32        | 0.97        | 8.26e-06        | 0.198(53386)        | 0.189(77258)         | 0.049        | 0.011        |      |
| PGC_SCZ wave3 asn only                             | 5         | 0.92        | 0.000221        | 0.275(14004)        | 0.262(16757)         | 0.073        | 0.02         |      |
| PGC_SCZ afram only                                 | -         | 0.80        | 0.206           | -(6152)             | 0.048(3918)          | -0.096       | 0.076        |      |
| PGC_SCZ latino only                                | -         | 0.90        | 0.014           | -(1234)             | 0.203(3090)          | 0.156        | 0.064        |      |
| PGC_SCZ wave2 only                                 | 5         | 0.96        | 0.000335        | 0.199(34850)        | 0.187(44347)         | 0.05         | 0.014        |      |
| PGC_SCZ wave3 (excl. wave2)                        | 32        | 0.93        | 4.87e-06        | 0.189(39926)        | 0.188(56676)         | 0.059        | 0.013        |      |
| <b>PGC_SCZ wave3 (incl. wave2)</b>                 | <b>37</b> | <b>0.94</b> | <b>6.28e-09</b> | <b>0.193(74776)</b> | <b>0.188(101023)</b> | <b>0.055</b> | <b>0.009</b> |      |
| Decode – Replication                               | -         | 1.00        | 0.103           | 0.189(1979)         | 0.187(142627)        | 0.078        | 0.048        |      |
| <b>PGC_SCZ wave3 (incl. wave2 and replication)</b> | <b>37</b> | <b>0.97</b> | <b>1.71e-09</b> | <b>0.193(76755)</b> | <b>0.187(243650)</b> | <b>0.056</b> | <b>0.009</b> |      |

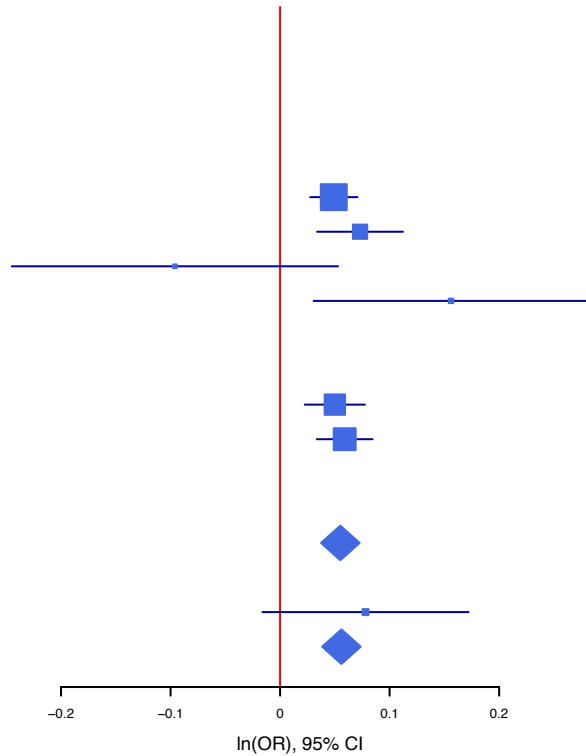

| rs619091                                           | A/T      |             | 11:133884137    |                    | het_P:               | 0.125         | het_I:       | 51.9 |
|----------------------------------------------------|----------|-------------|-----------------|--------------------|----------------------|---------------|--------------|------|
|                                                    | ngt      | info        | p_value         | f_ca(n)            |                      |               |              |      |
| PGC_SCZ wave3 eur only                             | 0        | 0.97        | 6.73e-06        | 0.394(53386)       | 0.403(77258)         | -0.04         | 0.009        |      |
| PGC_SCZ wave3 asn only                             | 0        | 0.93        | 0.000423        | 0.488(14004)       | 0.505(16757)         | -0.062        | 0.018        |      |
| PGC_SCZ afram only                                 | -        | 0.95        | 0.784           | -(6152)            | 0.379(3918)          | -0.008        | 0.031        |      |
| PGC_SCZ latino only                                | -        | 0.99        | 0.0106          | -(1234)            | 0.496(3090)          | -0.129        | 0.05         |      |
| PGC_SCZ wave2 only                                 | 0        | 0.98        | 7.92e-07        | 0.4(34850)         | 0.409(44347)         | -0.055        | 0.011        |      |
| PGC_SCZ wave3 (excl. wave2)                        | 0        | 0.95        | 0.000802        | 0.432(39926)       | 0.433(56676)         | -0.035        | 0.01         |      |
| <b>PGC_SCZ wave3 (incl. wave2)</b>                 | <b>0</b> | <b>0.97</b> | <b>7.04e-09</b> | <b>0.42(74776)</b> | <b>0.424(101023)</b> | <b>-0.044</b> | <b>0.008</b> |      |
| Decode – Replication                               | -        | 1.00        | 0.0552          | 0.398(1979)        | 0.368(142627)        | -0.074        | 0.038        |      |
| <b>PGC_SCZ wave3 (incl. wave2 and replication)</b> | <b>0</b> | <b>0.98</b> | <b>1.78e-09</b> | <b>0.42(76755)</b> | <b>0.393(243650)</b> | <b>-0.045</b> | <b>0.008</b> |      |

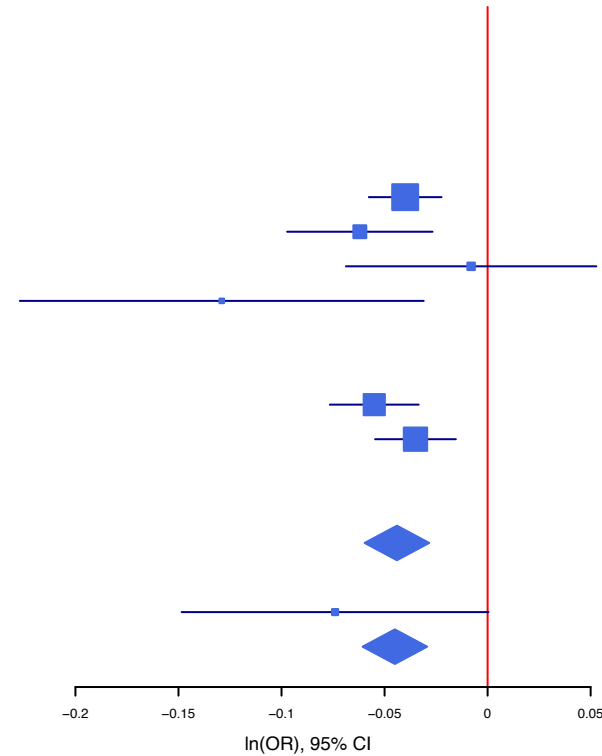

rs11227250 C/T 11:65438345  
 +++ het\_P: 0.963 het\_I: 0.0

|                                                    | ngt      | info        | p_value         | f_ca(n)             | f_co(n)              | ln(OR)        | STDerr       |
|----------------------------------------------------|----------|-------------|-----------------|---------------------|----------------------|---------------|--------------|
| PGC_SCZ wave3 eur only                             | 0        | 1.00        | 3.55e-07        | 0.635(53386)        | 0.643(77258)         | -0.046        | 0.009        |
| PGC_SCZ wave3 asn only                             | 0        | 0.97        | 0.0335          | 0.872(14004)        | 0.877(16757)         | -0.055        | 0.026        |
| PGC_SCZ afram only                                 | -        | 0.97        | 0.485           | -(6152)             | 0.905(3918)          | -0.036        | 0.051        |
| PGC_SCZ latino only                                | -        | 0.96        | 0.551           | -(1234)             | 0.768(3090)          | -0.036        | 0.06         |
| PGC_SCZ wave2 only                                 | 0        | 1.00        | 9.23e-05        | 0.65(34850)         | 0.652(44347)         | -0.044        | 0.011        |
| PGC_SCZ wave3 (excl. wave2)                        | 0        | 0.98        | 6.85e-05        | 0.767(39926)        | 0.751(56676)         | -0.048        | 0.012        |
| <b>PGC_SCZ wave3 (incl. wave2)</b>                 | <b>0</b> | <b>0.99</b> | <b>2.63e-08</b> | <b>0.721(74776)</b> | <b>0.713(101023)</b> | <b>-0.046</b> | <b>0.008</b> |
| Decode – Replication                               | -        | 1.00        | 0.00662         | 0.66(1979)          | 0.647(142627)        | -0.105        | 0.039        |
| <b>PGC_SCZ wave3 (incl. wave2 and replication)</b> | <b>0</b> | <b>0.99</b> | <b>1.83e-09</b> | <b>0.72(76755)</b>  | <b>0.677(243650)</b> | <b>-0.049</b> | <b>0.008</b> |

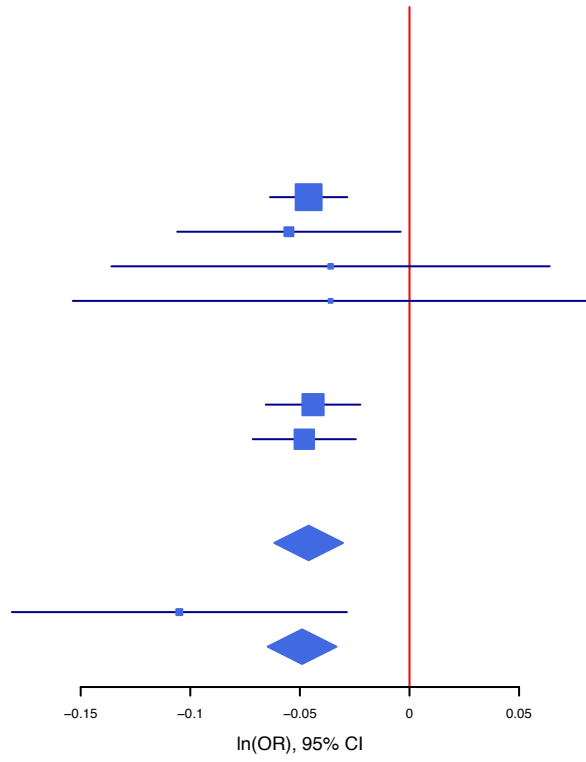

rs220520

T/C

20:37278946

---

het\_P:

0.767

het\_I:

0.0

ngt info p\_value f\_ca(n) f\_co(n) ln(OR) STDerr

PGC\_SCZ wave3 eur only 3 0.99 1.24e-06 0.383(53386) 0.39(77258) -0.043 0.009

PGC\_SCZ wave3 asn only 1 0.97 0.00336 0.395(14004) 0.41(16757) -0.051 0.018

PGC\_SCZ afram only - 1.00 0.77 -(6152) 0.115(3918) -0.014 0.046

PGC\_SCZ latino only - 1.02 0.572 -(1234) 0.395(3090) -0.029 0.05

PGC\_SCZ wave2 only 3 0.99 7.84e-05 0.38(34850) 0.386(44347) -0.044 0.011

PGC\_SCZ wave3 (excl. wave2) 1 0.99 5.62e-05 0.338(39926) 0.357(56676) -0.043 0.011

**PGC\_SCZ wave3 (incl. wave2) 4 0.99 1.52e-08 0.354(74776) 0.367(101023) -0.044 0.008**

Decode - Replication - 1.00 0.0176 0.4(1979) 0.405(142627) -0.093 0.039

**PGC\_SCZ wave3 (incl. wave2 and replication) 4 1.00 1.83e-09 0.355(76755) 0.388(243650) -0.045 0.008**

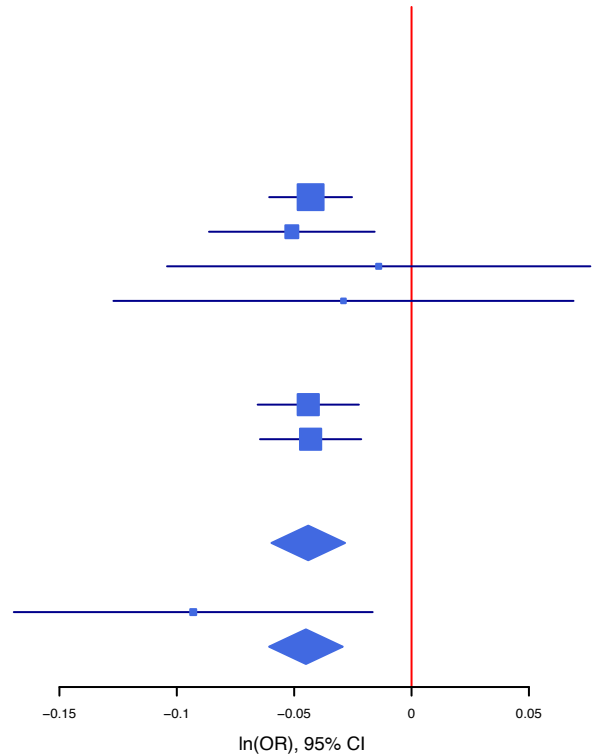

rs117145318

C/A 12:110229434  
+?+ het\_P: 0.931 het\_I: 0.0

|                                                    | ngt      | info        | p_value         | f_ca(n)             | f_co(n)              | ln(OR)        | STDerr       |
|----------------------------------------------------|----------|-------------|-----------------|---------------------|----------------------|---------------|--------------|
| PGC_SCZ wave3 eur only                             | 0        | 0.85        | 3.79e-08        | 0.954(53386)        | 0.957(77258)         | -0.124        | 0.022        |
| PGC_SCZ latino only                                | -        | 0.93        | 0.362           | -(1234)             | 0.973(3090)          | -0.137        | 0.15         |
| PGC_SCZ wave2 only                                 | 0        | 0.85        | 2.91e-05        | 0.954(34850)        | 0.958(44347)         | -0.121        | 0.029        |
| PGC_SCZ wave3 (excl. wave2)                        | 0        | 0.87        | 0.000221        | 0.961(39926)        | 0.961(56676)         | -0.129        | 0.035        |
| <b>PGC_SCZ wave3 (incl. wave2)</b>                 | <b>0</b> | <b>0.86</b> | <b>2.39e-08</b> | <b>0.957(74776)</b> | <b>0.959(101023)</b> | <b>-0.124</b> | <b>0.022</b> |
| Decode - Replication                               | -        | 1.00        | 0.0128          | 0.958(1979)         | 0.961(142627)        | -0.223        | 0.09         |
| <b>PGC_SCZ wave3 (incl. wave2 and replication)</b> | <b>0</b> | <b>0.94</b> | <b>1.91e-09</b> | <b>0.957(76755)</b> | <b>0.96(243650)</b>  | <b>-0.13</b>  | <b>0.022</b> |

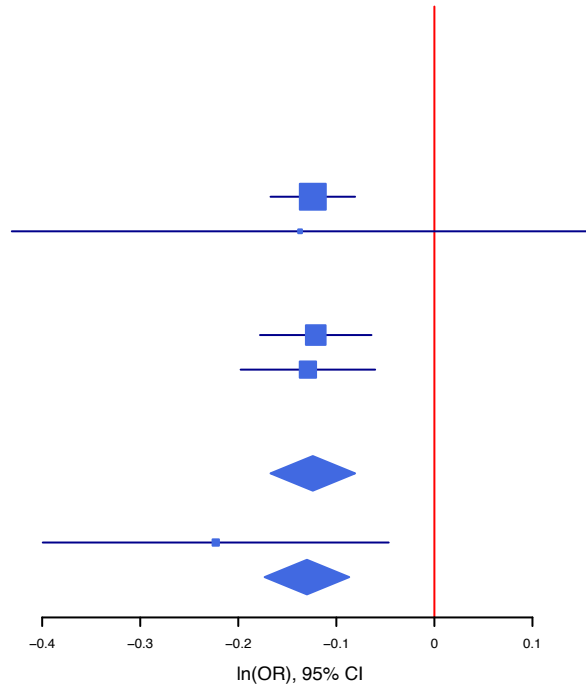

**rs13293831**                      **C/T**                      **9:129665139**  
 +++                                      het\_P:                      0.51    het\_I:                      0.0

|                                                    | ngt      | info        | p_value         | f_ca(n)             | f_co(n)              | ln(OR)        | STDerr      |
|----------------------------------------------------|----------|-------------|-----------------|---------------------|----------------------|---------------|-------------|
| PGC_SCZ wave3 eur only                             | 0        | 0.98        | 1.56e-05        | 0.841(53386)        | 0.851(77258)         | -0.052        | 0.012       |
| PGC_SCZ wave3 asn only                             | 0        | 0.95        | 0.000364        | 0.815(14004)        | 0.833(16757)         | -0.082        | 0.023       |
| PGC_SCZ afram only                                 | -        | 0.88        | 0.76            | -(6152)             | 0.935(3918)          | -0.019        | 0.064       |
| PGC_SCZ latino only                                | -        | 1.00        | 0.0425          | -(1234)             | 0.72(3090)           | -0.114        | 0.056       |
| PGC_SCZ wave2 only                                 | 0        | 0.98        | 0.000225        | 0.843(34850)        | 0.854(44347)         | -0.056        | 0.015       |
| PGC_SCZ wave3 (excl. wave2)                        | 0        | 0.96        | 1.09e-05        | 0.828(39926)        | 0.838(56676)         | -0.062        | 0.014       |
| <b>PGC_SCZ wave3 (incl. wave2)</b>                 | <b>0</b> | <b>0.97</b> | <b>8.73e-09</b> | <b>0.834(74776)</b> | <b>0.844(101023)</b> | <b>-0.059</b> | <b>0.01</b> |
| Decode – Replication                               | -        | 1.00        | 0.0522          | 0.845(1979)         | 0.852(142627)        | -0.102        | 0.053       |
| <b>PGC_SCZ wave3 (incl. wave2 and replication)</b> | <b>0</b> | <b>0.99</b> | <b>1.92e-09</b> | <b>0.834(76755)</b> | <b>0.848(243650)</b> | <b>-0.061</b> | <b>0.01</b> |

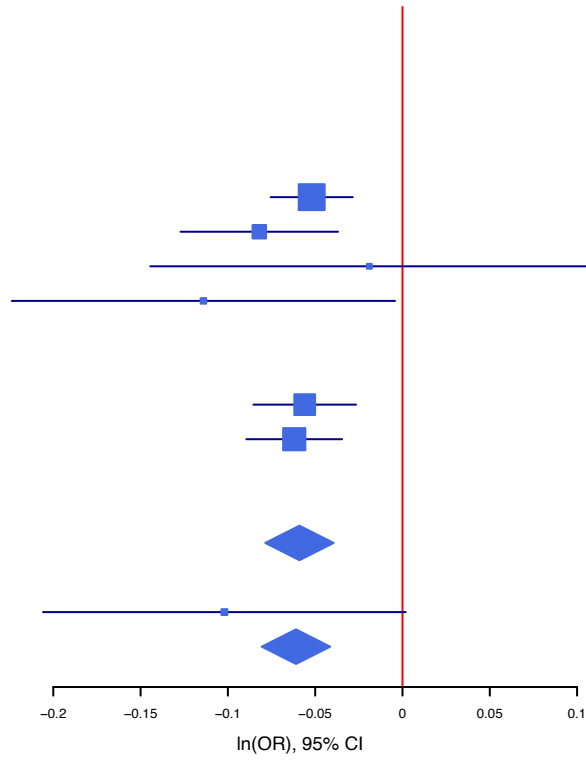

rs72978184                      **G/A**                      **18:77542016**  
 +++                                      het\_P:                      0.747    het\_I:                      0.0

|                                                    | ngt      | info        | p_value         | f_ca(n)             | f_co(n)              | ln(OR)        | STDerr       |
|----------------------------------------------------|----------|-------------|-----------------|---------------------|----------------------|---------------|--------------|
| PGC_SCZ wave3 eur only                             | 1        | 0.84        | 1.73e-08        | 0.904(53386)        | 0.908(77258)         | -0.09         | 0.016        |
| PGC_SCZ afram only                                 | -        | 0.95        | 0.141           | -(6152)             | 0.982(3918)          | -0.172        | 0.117        |
| PGC_SCZ latino only                                | -        | 0.98        | 0.291           | -(1234)             | 0.964(3090)          | -0.136        | 0.129        |
| PGC_SCZ wave2 only                                 | 1        | 0.87        | 6.13e-05        | 0.903(34850)        | 0.907(44347)         | -0.081        | 0.02         |
| PGC_SCZ wave3 (excl. wave2)                        | 0        | 0.81        | 6.37e-06        | 0.946(39926)        | 0.94(56676)          | -0.113        | 0.025        |
| <b>PGC_SCZ wave3 (incl. wave2)</b>                 | <b>1</b> | <b>0.83</b> | <b>2.52e-09</b> | <b>0.927(74776)</b> | <b>0.926(101023)</b> | <b>-0.093</b> | <b>0.016</b> |
| Decode - Replication                               | -        | 1.00        | 0.447           | 0.925(1979)         | 0.915(142627)        | -0.055        | 0.072        |
| <b>PGC_SCZ wave3 (incl. wave2 and replication)</b> | <b>1</b> | <b>0.92</b> | <b>1.97e-09</b> | <b>0.927(76755)</b> | <b>0.92(243650)</b>  | <b>-0.092</b> | <b>0.015</b> |

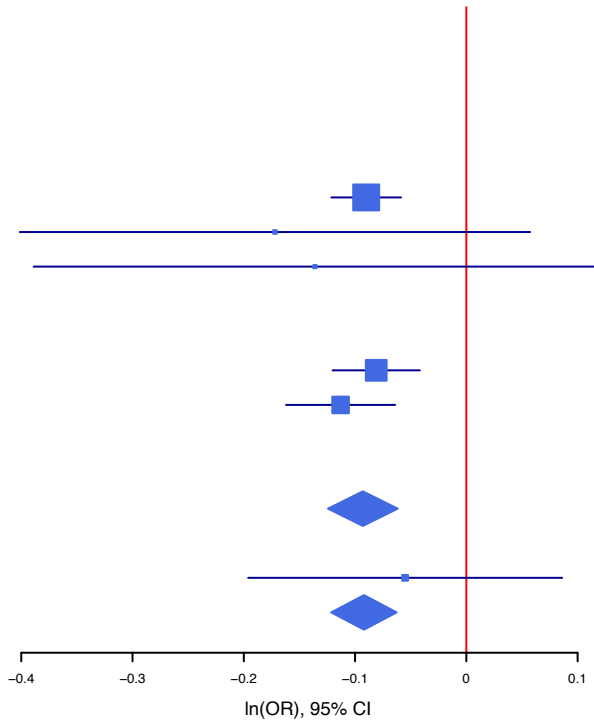

| rs8084351                                          | G/A       |             | 18:50726559     |                     | het_P:               | 0.506         | het_I:       | 0.0 |
|----------------------------------------------------|-----------|-------------|-----------------|---------------------|----------------------|---------------|--------------|-----|
|                                                    | ngt       | info        | p_value         | f_ca(n)             |                      |               |              |     |
| PGC_SCZ wave3 eur only                             | 53        | 1.00        | 2.29e-07        | 0.479(53386)        | 0.488(77258)         | -0.045        | 0.009        |     |
| PGC_SCZ wave3 asn only                             | 9         | 0.98        | 0.127           | 0.962(14004)        | 0.965(16757)         | -0.07         | 0.046        |     |
| PGC_SCZ afram only                                 | -         | 1.00        | 0.0435          | -(6152)             | 0.514(3918)          | -0.059        | 0.029        |     |
| PGC_SCZ latino only                                | -         | 1.01        | 0.0539          | -(1234)             | 0.727(3090)          | -0.107        | 0.056        |     |
| PGC_SCZ wave2 only                                 | 17        | 1.00        | 0.000134        | 0.501(34850)        | 0.497(44347)         | -0.042        | 0.011        |     |
| PGC_SCZ wave3 (excl. wave2)                        | 45        | 1.00        | 4.11e-06        | 0.646(39926)        | 0.635(56676)         | -0.054        | 0.012        |     |
| <b>PGC_SCZ wave3 (incl. wave2)</b>                 | <b>62</b> | <b>1.00</b> | <b>3.18e-09</b> | <b>0.59(74776)</b>  | <b>0.582(101023)</b> | <b>-0.048</b> | <b>0.008</b> |     |
| Decode – Replication                               | -         | 1.00        | 0.291           | 0.523(1979)         | 0.515(142627)        | -0.041        | 0.039        |     |
| <b>PGC_SCZ wave3 (incl. wave2 and replication)</b> | <b>62</b> | <b>1.00</b> | <b>2.06e-09</b> | <b>0.589(76755)</b> | <b>0.545(243650)</b> | <b>-0.048</b> | <b>0.008</b> |     |

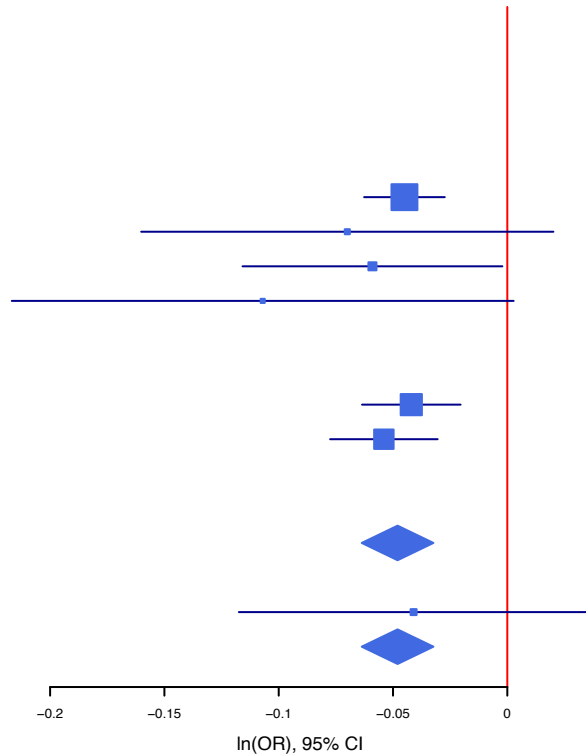



| rs2236989                                          | C/T       |             | 3:50505395      |                     | het_P:               | 0.021        | het_I:       | 74.2 |
|----------------------------------------------------|-----------|-------------|-----------------|---------------------|----------------------|--------------|--------------|------|
|                                                    | +-        |             |                 |                     |                      |              |              |      |
|                                                    | ngt       | info        | p_value         | f_ca(n)             | f_co(n)              | ln(OR)       | STDerr       |      |
| PGC_SCZ wave3 eur only                             | 34        | 0.96        | 4.57e-06        | 0.745(53386)        | 0.736(77258)         | 0.046        | 0.01         |      |
| PGC_SCZ wave3 asn only                             | 6         | 0.94        | 1.14e-06        | 0.775(14004)        | 0.763(16757)         | 0.102        | 0.021        |      |
| PGC_SCZ afram only                                 | -         | 0.96        | 0.0746          | -(6152)             | 0.924(3918)          | -0.102       | 0.057        |      |
| PGC_SCZ latino only                                | -         | 1.00        | 0.85            | -(1234)             | 0.879(3090)          | 0.014        | 0.076        |      |
| PGC_SCZ wave2 only                                 | 27        | 0.97        | 0.00129         | 0.743(34850)        | 0.734(44347)         | 0.04         | 0.012        |      |
| PGC_SCZ wave3 (excl. wave2)                        | 13        | 0.96        | 3.95e-07        | 0.816(39926)        | 0.794(56676)         | 0.064        | 0.013        |      |
| <b>PGC_SCZ wave3 (incl. wave2)</b>                 | <b>40</b> | <b>0.96</b> | <b>4.03e-09</b> | <b>0.787(74776)</b> | <b>0.771(101023)</b> | <b>0.052</b> | <b>0.009</b> |      |
| Decode – Replication                               | -         | 1.00        | 0.298           | 0.722(1979)         | 0.728(142627)        | 0.046        | 0.044        |      |
| <b>PGC_SCZ wave3 (incl. wave2 and replication)</b> | <b>40</b> | <b>0.98</b> | <b>2.13e-09</b> | <b>0.786(76755)</b> | <b>0.747(243650)</b> | <b>0.052</b> | <b>0.009</b> |      |

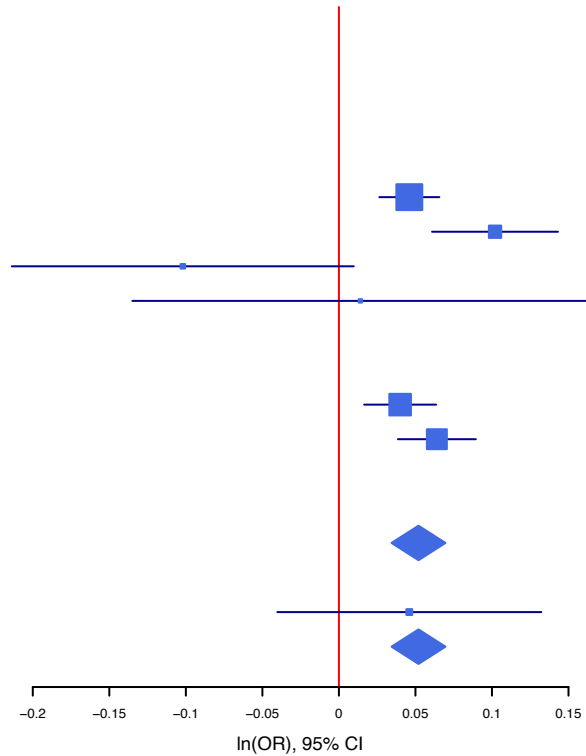

rs28521069 C/T 4:118852986  
 ++- het\_P: 0.371 het\_I: 0.0

|                                                    | ngt      | info        | p_value         | f_ca(n)            | f_co(n)              | ln(OR)        | STDerr       |
|----------------------------------------------------|----------|-------------|-----------------|--------------------|----------------------|---------------|--------------|
| PGC_SCZ wave3 eur only                             | 0        | 1.00        | 3.29e-06        | 0.67(53386)        | 0.681(77258)         | -0.043        | 0.009        |
| PGC_SCZ wave3 asn only                             | 0        | 0.98        | 0.0024          | 0.739(14004)       | 0.751(16757)         | -0.059        | 0.02         |
| PGC_SCZ afram only                                 | -        | 0.97        | 0.0156          | -(6152)            | 0.455(3918)          | -0.072        | 0.03         |
| PGC_SCZ latino only                                | -        | 1.01        | 0.725           | -(1234)            | 0.799(3090)          | 0.022         | 0.061        |
| PGC_SCZ wave2 only                                 | 0        | 1.00        | 0.000198        | 0.676(34850)       | 0.686(44347)         | -0.043        | 0.012        |
| PGC_SCZ wave3 (excl. wave2)                        | 0        | 0.99        | 5.81e-06        | 0.667(39926)       | 0.678(56676)         | -0.049        | 0.011        |
| <b>PGC_SCZ wave3 (incl. wave2)</b>                 | <b>0</b> | <b>0.99</b> | <b>4.69e-09</b> | <b>0.67(74776)</b> | <b>0.681(101023)</b> | <b>-0.046</b> | <b>0.008</b> |
| Decode – Replication                               | -        | 1.00        | 0.264           | 0.675(1979)        | 0.697(142627)        | -0.044        | 0.04         |
| <b>PGC_SCZ wave3 (incl. wave2 and replication)</b> | <b>0</b> | <b>1.00</b> | <b>2.25e-09</b> | <b>0.67(76755)</b> | <b>0.69(243650)</b>  | <b>-0.046</b> | <b>0.008</b> |

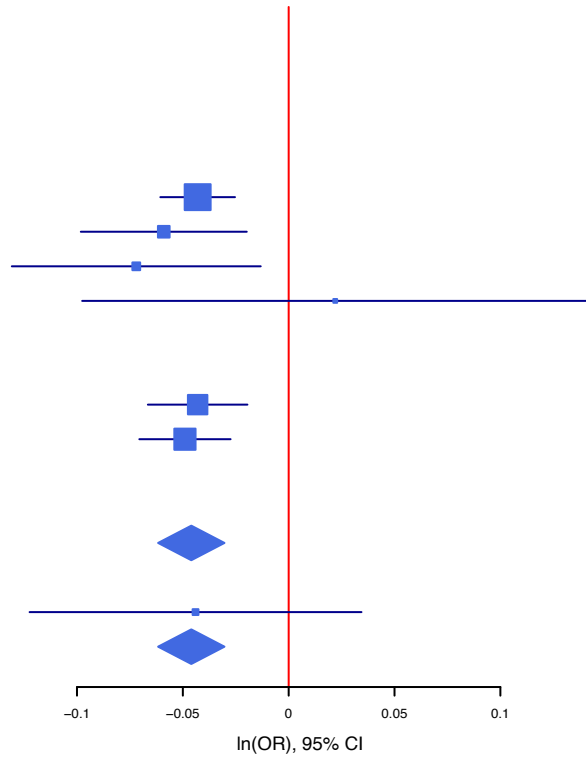

rs10894308

G/A 11:130891895  
--- het\_P: 0.691 het\_I: 0.0

|                                                    | ngt       | info        | p_value         | f_ca(n)             | f_co(n)              | ln(OR)       | STDerr       |
|----------------------------------------------------|-----------|-------------|-----------------|---------------------|----------------------|--------------|--------------|
| PGC_SCZ wave3 eur only                             | 30        | 0.97        | 8.18e-10        | 0.548(53386)        | 0.535(77258)         | 0.054        | 0.009        |
| PGC_SCZ wave3 asn only                             | 4         | 0.93        | 0.208           | 0.552(14004)        | 0.545(16757)         | 0.022        | 0.018        |
| PGC_SCZ afram only                                 | -         | 0.99        | 0.0603          | -(6152)             | 0.768(3918)          | 0.065        | 0.035        |
| PGC_SCZ latino only                                | -         | 0.96        | 0.811           | -(1234)             | 0.549(3090)          | 0.012        | 0.051        |
| PGC_SCZ wave2 only                                 | 2         | 0.95        | 1.44e-09        | 0.549(34850)        | 0.533(44347)         | 0.067        | 0.011        |
| PGC_SCZ wave3 (excl. wave2)                        | 32        | 0.97        | 0.00302         | 0.593(39926)        | 0.576(56676)         | 0.031        | 0.01         |
| <b>PGC_SCZ wave3 (incl. wave2)</b>                 | <b>34</b> | <b>0.96</b> | <b>3.59e-10</b> | <b>0.575(74776)</b> | <b>0.56(101023)</b>  | <b>0.048</b> | <b>0.008</b> |
| Decode - Replication                               | -         | 1.00        | 0.326           | 0.561(1979)         | 0.549(142627)        | -0.038       | 0.038        |
| <b>PGC_SCZ wave3 (incl. wave2 and replication)</b> | <b>34</b> | <b>0.98</b> | <b>2.28e-09</b> | <b>0.575(76755)</b> | <b>0.554(243650)</b> | <b>0.044</b> | <b>0.008</b> |

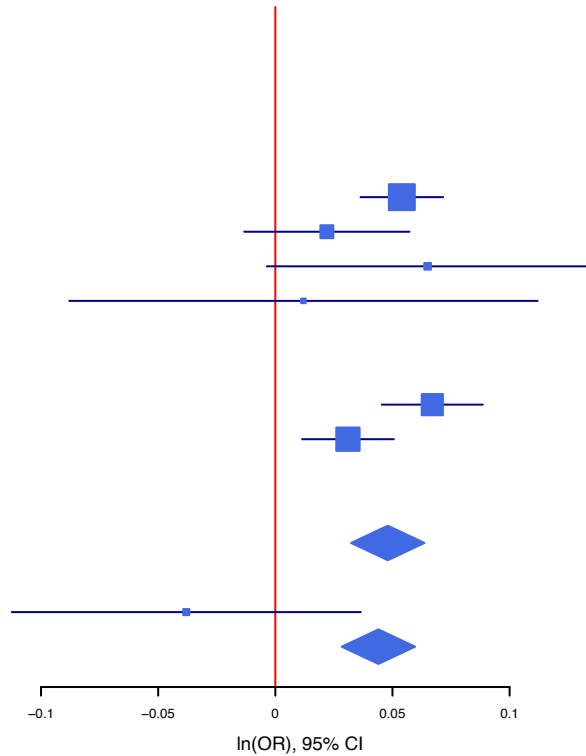

| rs9569820                                          | G/T      |             | 13:58702746     |                     | het_P:               | 0.177         | het_I:       | 42.3 |
|----------------------------------------------------|----------|-------------|-----------------|---------------------|----------------------|---------------|--------------|------|
|                                                    | ngt      | info        | p_value         | f_ca(n)             |                      |               |              |      |
| PGC_SCZ wave3 eur only                             | 0        | 0.96        | 9.45e-07        | 0.876(53386)        | 0.881(77258)         | -0.066        | 0.013        |      |
| PGC_SCZ wave3 asn only                             | 0        | 0.91        | 0.000167        | 0.66(14004)         | 0.67(16757)          | -0.071        | 0.019        |      |
| PGC_SCZ afram only                                 | -        | 0.78        | 0.287           | -(6152)             | 0.974(3918)          | 0.111         | 0.104        |      |
| PGC_SCZ latino only                                | -        | 0.92        | 0.115           | -(1234)             | 0.883(3090)          | -0.126        | 0.08         |      |
| PGC_SCZ wave2 only                                 | 0        | 0.98        | 8.63e-05        | 0.863(34850)        | 0.875(44347)         | -0.064        | 0.016        |      |
| PGC_SCZ wave3 (excl. wave2)                        | 0        | 0.91        | 1.69e-06        | 0.849(39926)        | 0.849(56676)         | -0.069        | 0.014        |      |
| <b>PGC_SCZ wave3 (incl. wave2)</b>                 | <b>0</b> | <b>0.93</b> | <b>5.16e-10</b> | <b>0.854(74776)</b> | <b>0.859(101023)</b> | <b>-0.067</b> | <b>0.011</b> |      |
| Decode – Replication                               | -        | 1.00        | 0.352           | 0.891(1979)         | 0.9(142627)          | 0.054         | 0.058        |      |
| <b>PGC_SCZ wave3 (incl. wave2 and replication)</b> | <b>0</b> | <b>0.97</b> | <b>2.38e-09</b> | <b>0.855(76755)</b> | <b>0.882(243650)</b> | <b>-0.063</b> | <b>0.01</b>  |      |

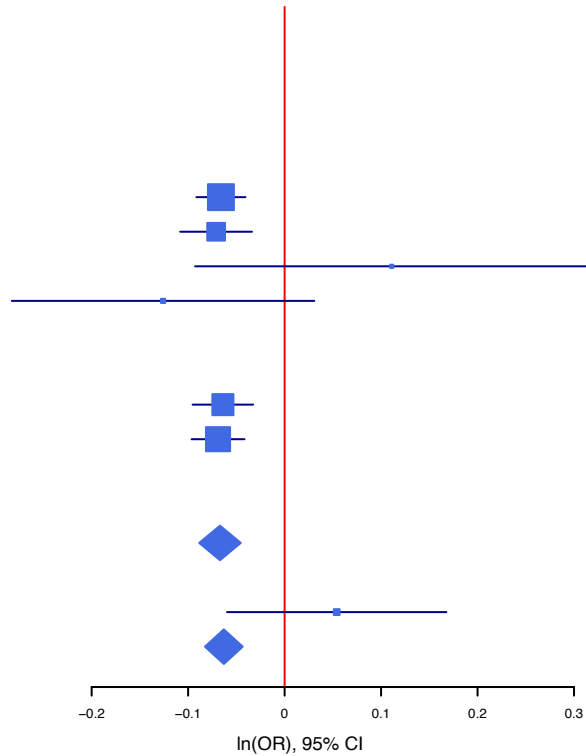

rs62278591 C/T 3:161444453

--- het\_P: 0.676 het\_I: 0.0

|                                                    | ngt      | info        | p_value         | f_ca(n)             | f_co(n)              | ln(OR)       | STDerr       |
|----------------------------------------------------|----------|-------------|-----------------|---------------------|----------------------|--------------|--------------|
| PGC_SCZ wave3 eur only                             | 0        | 1.00        | 6e-08           | 0.637(53386)        | 0.627(77258)         | 0.048        | 0.009        |
| PGC_SCZ wave3 asn only                             | 0        | 0.97        | 0.457           | 0.902(14004)        | 0.903(16757)         | 0.021        | 0.029        |
| PGC_SCZ afram only                                 | -        | 0.98        | 0.0149          | -(6152)             | 0.542(3918)          | 0.072        | 0.03         |
| PGC_SCZ latino only                                | -        | 0.99        | 0.514           | -(1234)             | 0.649(3090)          | 0.034        | 0.052        |
| PGC_SCZ wave2 only                                 | 0        | 0.99        | 3.45e-05        | 0.653(34850)        | 0.634(44347)         | 0.047        | 0.011        |
| PGC_SCZ wave3 (excl. wave2)                        | 0        | 0.99        | 2.79e-05        | 0.679(39926)        | 0.678(56676)         | 0.048        | 0.012        |
| <b>PGC_SCZ wave3 (incl. wave2)</b>                 | <b>0</b> | <b>0.99</b> | <b>3.56e-09</b> | <b>0.669(74776)</b> | <b>0.661(101023)</b> | <b>0.048</b> | <b>0.008</b> |
| Decode – Replication                               | -        | 0.95        | 0.339           | 0.624(1979)         | 0.621(142627)        | 0.04         | 0.042        |
| <b>PGC_SCZ wave3 (incl. wave2 and replication)</b> | <b>0</b> | <b>0.97</b> | <b>2.46e-09</b> | <b>0.668(76755)</b> | <b>0.639(243650)</b> | <b>0.047</b> | <b>0.008</b> |

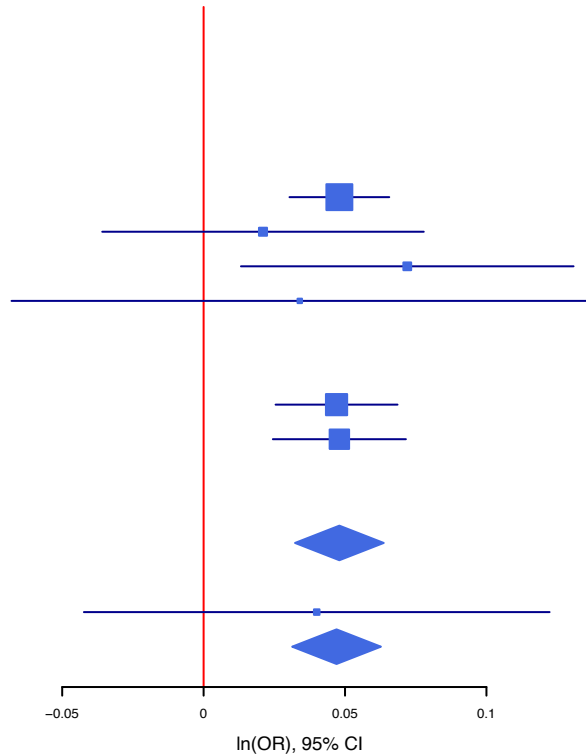

rs12432904                      G/T                      14:103812320  
 ---+                      het\_P:                      0.102    het\_I:                      56.1

|                                                    | ngt      | info        | p_value         | f_ca(n)             | f_co(n)              | ln(OR)       | STDerr       |
|----------------------------------------------------|----------|-------------|-----------------|---------------------|----------------------|--------------|--------------|
| PGC_SCZ wave3 eur only                             | 0        | 0.97        | 5.46e-09        | 0.665(53386)        | 0.652(77258)         | 0.054        | 0.009        |
| PGC_SCZ wave3 asn only                             | 0        | 0.90        | 0.14            | 0.621(14004)        | 0.614(16757)         | 0.027        | 0.018        |
| PGC_SCZ afram only                                 | -        | 0.88        | 0.765           | -(6152)             | 0.568(3918)          | 0.009        | 0.031        |
| PGC_SCZ latino only                                | -        | 0.99        | 0.362           | -(1234)             | 0.661(3090)          | -0.048       | 0.052        |
| PGC_SCZ wave2 only                                 | 0        | 0.97        | 2.61e-05        | 0.665(34850)        | 0.654(44347)         | 0.049        | 0.012        |
| PGC_SCZ wave3 (excl. wave2)                        | 0        | 0.95        | 0.00023         | 0.634(39926)        | 0.63(56676)          | 0.039        | 0.011        |
| <b>PGC_SCZ wave3 (incl. wave2)</b>                 | <b>0</b> | <b>0.96</b> | <b>2.5e-08</b>  | <b>0.646(74776)</b> | <b>0.639(101023)</b> | <b>0.044</b> | <b>0.008</b> |
| Decode – Replication                               | -        | 1.00        | 0.0162          | 0.633(1979)         | 0.654(142627)        | 0.095        | 0.039        |
| <b>PGC_SCZ wave3 (incl. wave2 and replication)</b> | <b>0</b> | <b>0.98</b> | <b>2.48e-09</b> | <b>0.646(76755)</b> | <b>0.647(243650)</b> | <b>0.046</b> | <b>0.008</b> |

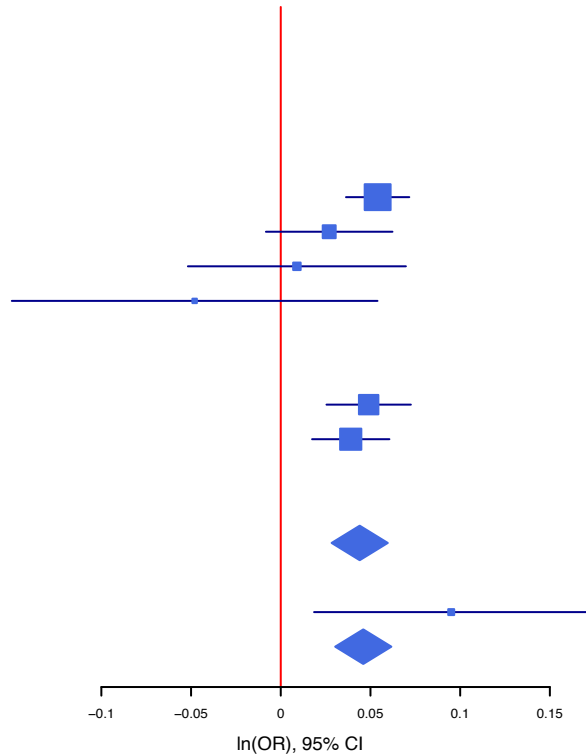

| rs10157075                                         | A/T      |             | 1:84210463      |                     | het_P:               | 0.022        | het_I:      | 73.9 |
|----------------------------------------------------|----------|-------------|-----------------|---------------------|----------------------|--------------|-------------|------|
|                                                    | ngt      | info        | p_value         | f_ca(n)             |                      |              |             |      |
| PGC_SCZ wave3 eur only                             | 0        | 0.99        | 1.32e-06        | 0.826(53386)        | 0.816(77258)         | 0.054        | 0.011       |      |
| PGC_SCZ wave3 asn only                             | 0        | 1.00        | 0.0384          | 0.878(14004)        | 0.871(16757)         | 0.053        | 0.026       |      |
| PGC_SCZ afram only                                 | -        | 0.97        | 0.000274        | -(6152)             | 0.945(3918)          | 0.233        | 0.064       |      |
| PGC_SCZ latino only                                | -        | 0.98        | 0.365           | -(1234)             | 0.917(3090)          | 0.082        | 0.09        |      |
| PGC_SCZ wave2 only                                 | 0        | 0.99        | 3.79e-05        | 0.829(34850)        | 0.818(44347)         | 0.058        | 0.014       |      |
| PGC_SCZ wave3 (excl. wave2)                        | 0        | 0.99        | 3.56e-05        | 0.88(39926)         | 0.862(56676)         | 0.059        | 0.014       |      |
| <b>PGC_SCZ wave3 (incl. wave2)</b>                 | <b>0</b> | <b>0.99</b> | <b>5.26e-09</b> | <b>0.86(74776)</b>  | <b>0.845(101023)</b> | <b>0.059</b> | <b>0.01</b> |      |
| Decode – Replication                               | -        | 1.00        | 0.244           | 0.827(1979)         | 0.808(142627)        | 0.057        | 0.049       |      |
| <b>PGC_SCZ wave3 (incl. wave2 and replication)</b> | <b>0</b> | <b>1.00</b> | <b>2.57e-09</b> | <b>0.859(76755)</b> | <b>0.824(243650)</b> | <b>0.059</b> | <b>0.01</b> |      |

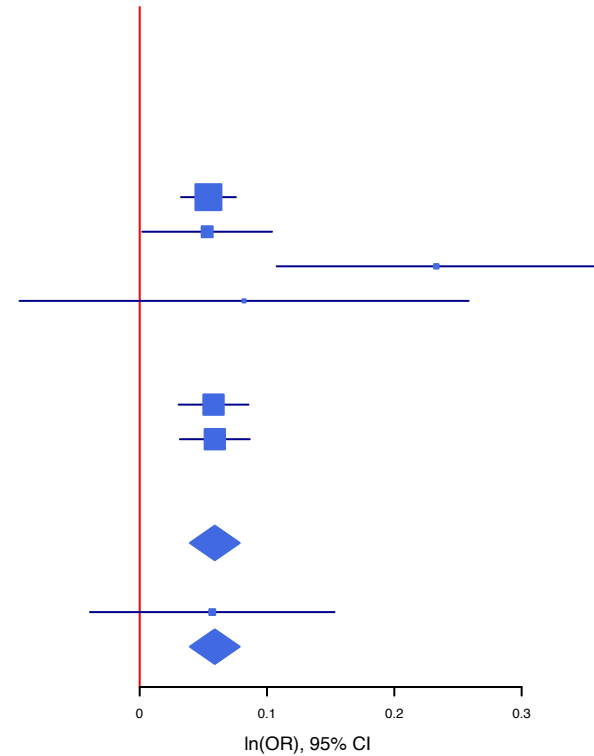

|                                                    | C/T      |             | 2:22697499      |                     | het_P:               | 0.005        | het_I:       | 81.4 |
|----------------------------------------------------|----------|-------------|-----------------|---------------------|----------------------|--------------|--------------|------|
|                                                    | ngt      | info        | p_value         | f_ca(n)             |                      |              |              |      |
| PGC_SCZ wave3 eur only                             | 7        | 0.99        | 5.45e-10        | 0.472(53386)        | 0.459(77258)         | 0.054        | 0.009        |      |
| PGC_SCZ wave3 asn only                             | 0        | 0.94        | 0.634           | 0.889(14004)        | 0.896(16757)         | -0.014       | 0.03         |      |
| PGC_SCZ afram only                                 | -        | 0.98        | 0.00292         | -(6152)             | 0.608(3918)          | 0.09         | 0.03         |      |
| PGC_SCZ latino only                                | -        | 1.00        | 0.036           | -(1234)             | 0.7(3090)            | -0.115       | 0.055        |      |
| PGC_SCZ wave2 only                                 | 1        | 0.99        | 1.75e-08        | 0.494(34850)        | 0.466(44347)         | 0.062        | 0.011        |      |
| PGC_SCZ wave3 (excl. wave2)                        | 6        | 0.98        | 0.0043          | 0.639(39926)        | 0.617(56676)         | 0.032        | 0.011        |      |
| <b>PGC_SCZ wave3 (incl. wave2)</b>                 | <b>7</b> | <b>0.98</b> | <b>1.63e-09</b> | <b>0.582(74776)</b> | <b>0.559(101023)</b> | <b>0.048</b> | <b>0.008</b> |      |
| Decode – Replication                               | -        | 1.00        | 0.904           | 0.484(1979)         | 0.474(142627)        | 0.004        | 0.038        |      |
| <b>PGC_SCZ wave3 (incl. wave2 and replication)</b> | <b>7</b> | <b>0.99</b> | <b>2.74e-09</b> | <b>0.58(76755)</b>  | <b>0.512(243650)</b> | <b>0.046</b> | <b>0.008</b> |      |

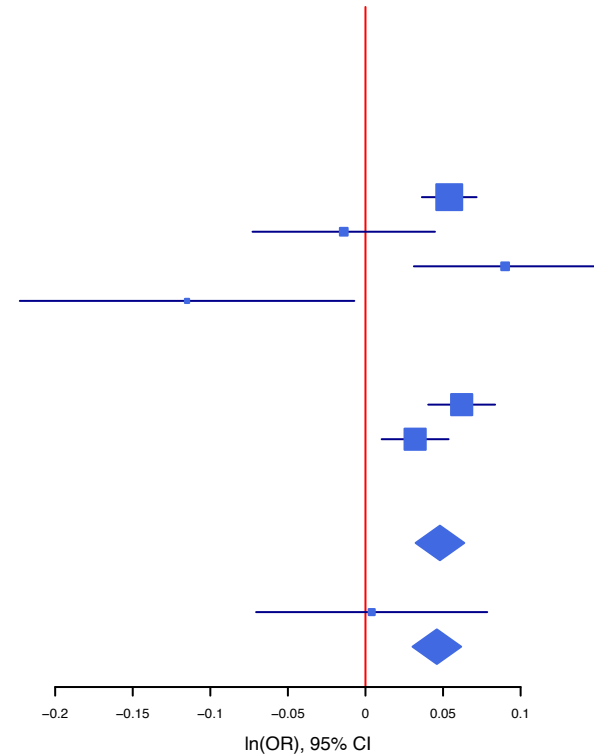



rs11862968 C/G 16:68414975

--- het\_P: 0.302 het\_I: 16.5

|                                                    | ngt       | info        | p_value         | f_ca(n)             | f_co(n)              | ln(OR)        | STDerr       |
|----------------------------------------------------|-----------|-------------|-----------------|---------------------|----------------------|---------------|--------------|
| PGC_SCZ wave3 eur only                             | 11        | 0.99        | 1.32e-06        | 0.775(53386)        | 0.783(77258)         | -0.051        | 0.01         |
| PGC_SCZ wave3 asn only                             | 3         | 0.97        | 0.157           | 0.917(14004)        | 0.923(16757)         | -0.045        | 0.032        |
| PGC_SCZ afram only                                 | -         | 0.99        | 0.00627         | -(6152)             | 0.584(3918)          | -0.082        | 0.03         |
| PGC_SCZ latino only                                | -         | 0.98        | 0.0505          | -(1234)             | 0.851(3090)          | -0.134        | 0.068        |
| PGC_SCZ wave2 only                                 | 11        | 0.99        | 2.28e-05        | 0.78(34850)         | 0.783(44347)         | -0.056        | 0.013        |
| PGC_SCZ wave3 (excl. wave2)                        | 3         | 0.98        | 5.29e-05        | 0.786(39926)        | 0.796(56676)         | -0.053        | 0.013        |
| <b>PGC_SCZ wave3 (incl. wave2)</b>                 | <b>14</b> | <b>0.98</b> | <b>4.71e-09</b> | <b>0.783(74776)</b> | <b>0.791(101023)</b> | <b>-0.055</b> | <b>0.009</b> |
| Decode - Replication                               | -         | 1.00        | 0.345           | 0.787(1979)         | 0.767(142627)        | -0.044        | 0.047        |
| <b>PGC_SCZ wave3 (incl. wave2 and replication)</b> | <b>14</b> | <b>0.99</b> | <b>2.8e-09</b>  | <b>0.783(76755)</b> | <b>0.778(243650)</b> | <b>-0.054</b> | <b>0.009</b> |

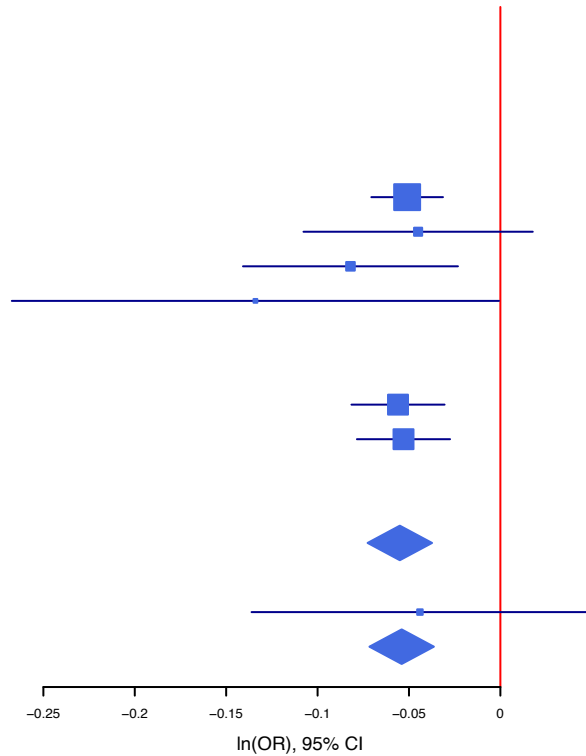

| rs356183                                           | G/C      |             | 4:90626098      |                     | het_P:               | 0.524        | het_I:       | 0.0 |
|----------------------------------------------------|----------|-------------|-----------------|---------------------|----------------------|--------------|--------------|-----|
|                                                    | ngt      | info        | p_value         | f_ca(n)             |                      |              |              |     |
| PGC_SCZ wave3 eur only                             | 0        | 0.96        | 3.09e-06        | 0.449(53386)        | 0.438(77258)         | 0.041        | 0.009        |     |
| PGC_SCZ wave3 asn only                             | 0        | 0.85        | 0.00217         | 0.635(14004)        | 0.626(16757)         | 0.059        | 0.019        |     |
| PGC_SCZ afram only                                 | -        | 0.91        | 0.793           | -(6152)             | 0.65(3918)           | 0.008        | 0.032        |     |
| PGC_SCZ latino only                                | -        | 0.97        | 0.645           | -(1234)             | 0.523(3090)          | 0.024        | 0.051        |     |
| PGC_SCZ wave2 only                                 | 0        | 0.96        | 0.000484        | 0.458(34850)        | 0.441(44347)         | 0.039        | 0.011        |     |
| PGC_SCZ wave3 (excl. wave2)                        | 0        | 0.93        | 2.99e-05        | 0.546(39926)        | 0.525(56676)         | 0.044        | 0.011        |     |
| <b>PGC_SCZ wave3 (incl. wave2)</b>                 | <b>0</b> | <b>0.94</b> | <b>5.15e-08</b> | <b>0.511(74776)</b> | <b>0.492(101023)</b> | <b>0.042</b> | <b>0.008</b> |     |
| Decode – Replication                               | -        | 1.00        | 0.00164         | 0.454(1979)         | 0.461(142627)        | 0.121        | 0.038        |     |
| <b>PGC_SCZ wave3 (incl. wave2 and replication)</b> | <b>0</b> | <b>0.97</b> | <b>2.83e-09</b> | <b>0.51(76755)</b>  | <b>0.475(243650)</b> | <b>0.045</b> | <b>0.008</b> |     |

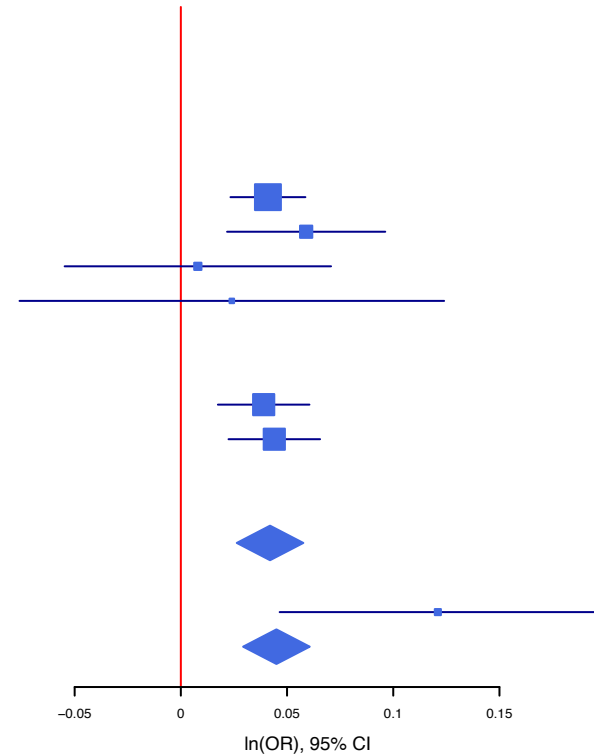

rs3764002 C/T 12:108618630  
 +++ het\_P: 0.874 het\_I: 0.0

|                                                    | ngt       | info        | p_value         | f_ca(n)             | f_co(n)              | ln(OR)        | STDerr       |
|----------------------------------------------------|-----------|-------------|-----------------|---------------------|----------------------|---------------|--------------|
| PGC_SCZ wave3 eur only                             | 67        | 0.98        | 3.33e-05        | 0.724(53386)        | 0.735(77258)         | -0.041        | 0.01         |
| PGC_SCZ wave3 asn only                             | 8         | 0.92        | 6.61e-07        | 0.455(14004)        | 0.47(16757)          | -0.089        | 0.018        |
| PGC_SCZ afram only                                 | -         | 1.00        | 0.742           | -(6152)             | 0.952(3918)          | -0.023        | 0.069        |
| PGC_SCZ latino only                                | -         | 1.02        | 0.648           | -(1234)             | 0.842(3090)          | -0.03         | 0.066        |
| PGC_SCZ wave2 only                                 | 30        | 0.97        | 0.000197        | 0.706(34850)        | 0.723(44347)         | -0.046        | 0.012        |
| PGC_SCZ wave3 (excl. wave2)                        | 45        | 0.98        | 1.71e-06        | 0.735(39926)        | 0.729(56676)         | -0.056        | 0.012        |
| <b>PGC_SCZ wave3 (incl. wave2)</b>                 | <b>75</b> | <b>0.98</b> | <b>1.79e-09</b> | <b>0.723(74776)</b> | <b>0.727(101023)</b> | <b>-0.051</b> | <b>0.008</b> |
| Decode - Replication                               | -         | 1.00        | 0.746           | 0.713(1979)         | 0.74(142627)         | -0.014        | 0.043        |
| <b>PGC_SCZ wave3 (incl. wave2 and replication)</b> | <b>75</b> | <b>0.99</b> | <b>2.92e-09</b> | <b>0.723(76755)</b> | <b>0.734(243650)</b> | <b>-0.049</b> | <b>0.008</b> |

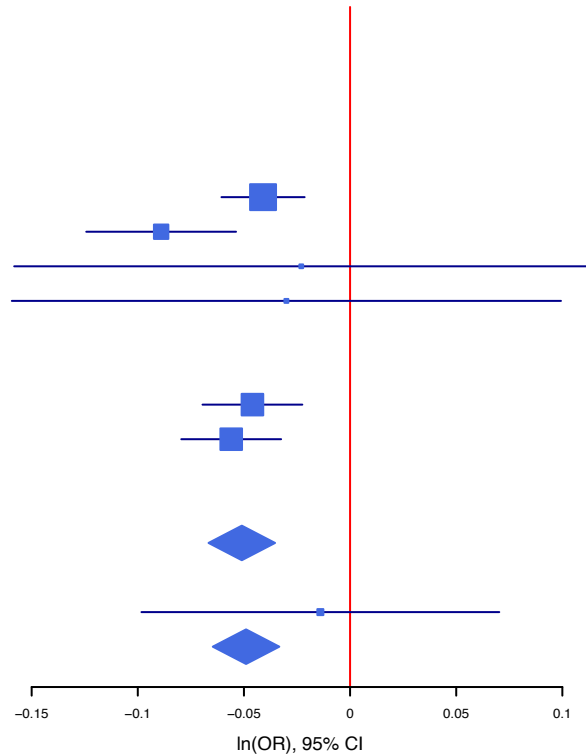

| rs7592902                                          | A/C      | 2:37136036  |                 | het_P:              | 0.373                | het_I:        | 0.0          |
|----------------------------------------------------|----------|-------------|-----------------|---------------------|----------------------|---------------|--------------|
|                                                    | --+      |             |                 |                     |                      |               |              |
|                                                    | ngt      | info        | p_value         | f_ca(n)             | f_co(n)              | ln(OR)        | STDerr       |
| PGC_SCZ wave3 eur only                             | 0        | 0.99        | 1.9e-05         | 0.516(53386)        | 0.523(77258)         | -0.037        | 0.009        |
| PGC_SCZ wave3 asn only                             | 0        | 0.97        | 6.37e-06        | 0.334(14004)        | 0.348(16757)         | -0.082        | 0.018        |
| PGC_SCZ afram only                                 | -        | 0.99        | 0.041           | -(6152)             | 0.58(3918)           | -0.061        | 0.03         |
| PGC_SCZ latino only                                | -        | 0.97        | 0.679           | -(1234)             | 0.565(3090)          | 0.021         | 0.051        |
| PGC_SCZ wave2 only                                 | 0        | 0.99        | 0.0251          | 0.507(34850)        | 0.517(44347)         | -0.024        | 0.011        |
| PGC_SCZ wave3 (excl. wave2)                        | 0        | 0.98        | 8.7e-10         | 0.497(39926)        | 0.501(56676)         | -0.063        | 0.01         |
| <b>PGC_SCZ wave3 (incl. wave2)</b>                 | <b>0</b> | <b>0.99</b> | <b>2.02e-09</b> | <b>0.501(74776)</b> | <b>0.507(101023)</b> | <b>-0.045</b> | <b>0.008</b> |
| Decode – Replication                               | -        | 1.00        | 0.661           | 0.504(1979)         | 0.523(142627)        | -0.017        | 0.038        |
| <b>PGC_SCZ wave3 (incl. wave2 and replication)</b> | <b>0</b> | <b>0.99</b> | <b>2.96e-09</b> | <b>0.501(76755)</b> | <b>0.516(243650)</b> | <b>-0.044</b> | <b>0.007</b> |

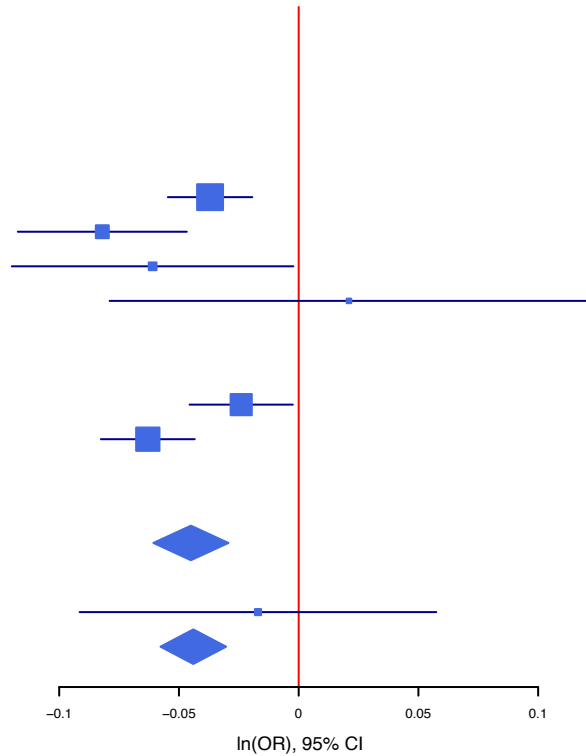

rs11715134

G/A  
+++      3:50552866  
het\_P:      0.905      het\_I:      0.0

|                                                    | ngt      | info        | p_value         | f_ca(n)             | f_co(n)              | ln(OR)        | STDerr       |
|----------------------------------------------------|----------|-------------|-----------------|---------------------|----------------------|---------------|--------------|
| PGC_SCZ wave3 eur only                             | 0        | 0.94        | 0.000566        | 0.906(53386)        | 0.91(77258)          | -0.053        | 0.015        |
| PGC_SCZ wave3 asn only                             | 0        | 0.95        | 2.36e-06        | 0.768(14004)        | 0.775(16757)         | -0.098        | 0.021        |
| PGC_SCZ afram only                                 | -        | 0.85        | 0.549           | -(6152)             | 0.975(3918)          | -0.061        | 0.102        |
| PGC_SCZ latino only                                | -        | 0.99        | 0.66            | -(1234)             | 0.878(3090)          | -0.034        | 0.077        |
| PGC_SCZ wave2 only                                 | 0        | 0.93        | 0.00797         | 0.901(34850)        | 0.908(44347)         | -0.051        | 0.019        |
| PGC_SCZ wave3 (excl. wave2)                        | 0        | 0.94        | 4.01e-07        | 0.881(39926)        | 0.884(56676)         | -0.079        | 0.016        |
| <b>PGC_SCZ wave3 (incl. wave2)</b>                 | <b>0</b> | <b>0.94</b> | <b>1.95e-08</b> | <b>0.889(74776)</b> | <b>0.894(101023)</b> | <b>-0.068</b> | <b>0.012</b> |
| Decode – Replication                               | -        | 1.00        | 0.0223          | 0.914(1979)         | 0.902(142627)        | -0.148        | 0.065        |
| <b>PGC_SCZ wave3 (incl. wave2 and replication)</b> | <b>0</b> | <b>0.97</b> | <b>3.08e-09</b> | <b>0.89(76755)</b>  | <b>0.898(243650)</b> | <b>-0.07</b>  | <b>0.012</b> |

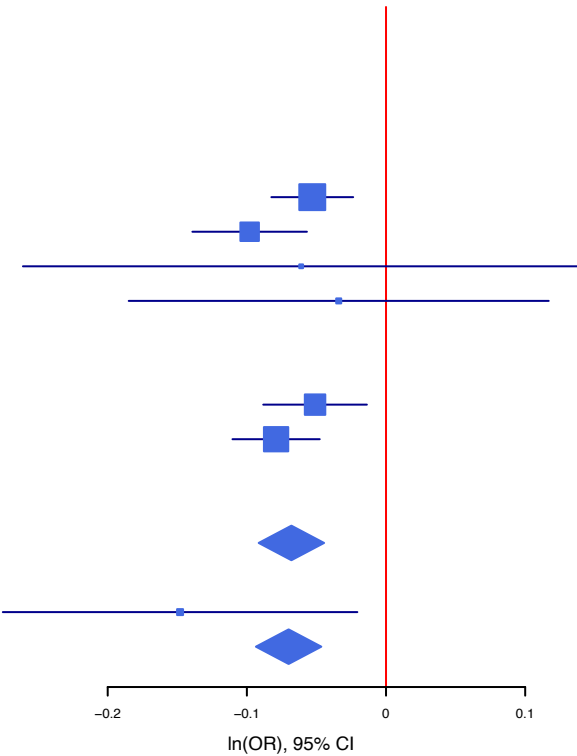

rs35531336

A/G 7:133438132  
+-- het\_P: 0.398 het\_I: 0.0

|                                                    | ngt      | info        | p_value         | f_ca(n)             | f_co(n)              | ln(OR)       | STDerr       |
|----------------------------------------------------|----------|-------------|-----------------|---------------------|----------------------|--------------|--------------|
| PGC_SCZ wave3 eur only                             | 1        | 0.93        | 2.22e-08        | 0.872(53386)        | 0.864(77258)         | 0.074        | 0.013        |
| PGC_SCZ wave3 asn only                             | 0        | 0.49        | 0.361           | 0.97(14004)         | 0.969(16757)         | 0.063        | 0.069        |
| PGC_SCZ afram only                                 | -        | 0.89        | 0.964           | -(6152)             | 0.974(3918)          | -0.004       | 0.098        |
| PGC_SCZ latino only                                | -        | 0.96        | 0.752           | -(1234)             | 0.919(3090)          | -0.029       | 0.09         |
| PGC_SCZ wave2 only                                 | 1        | 0.93        | 0.00198         | 0.877(34850)        | 0.868(44347)         | 0.052        | 0.017        |
| PGC_SCZ wave3 (excl. wave2)                        | 0        | 0.82        | 1.23e-06        | 0.923(39926)        | 0.911(56676)         | 0.095        | 0.02         |
| <b>PGC_SCZ wave3 (incl. wave2)</b>                 | <b>1</b> | <b>0.86</b> | <b>3.84e-08</b> | <b>0.905(74776)</b> | <b>0.894(101023)</b> | <b>0.07</b>  | <b>0.013</b> |
| Decode – Replication                               | -        | 1.00        | 0.00758         | 0.853(1979)         | 0.838(142627)        | 0.157        | 0.059        |
| <b>PGC_SCZ wave3 (incl. wave2 and replication)</b> | <b>1</b> | <b>0.94</b> | <b>3.24e-09</b> | <b>0.904(76755)</b> | <b>0.863(243650)</b> | <b>0.074</b> | <b>0.012</b> |

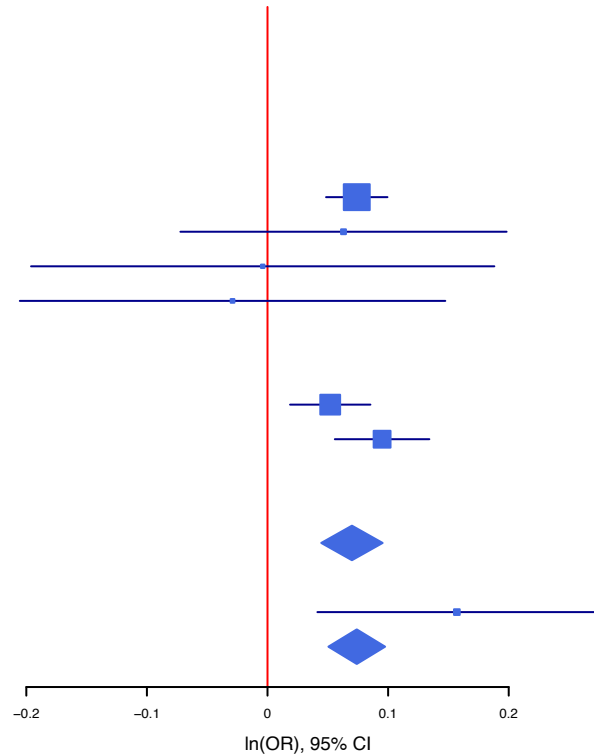

| rs1463209                                          | C/T       |             | 12:39518293     |                     | het_P:               | 0.046        | het_I:       | 67.6 |
|----------------------------------------------------|-----------|-------------|-----------------|---------------------|----------------------|--------------|--------------|------|
|                                                    | ngt       | info        | p_value         | f_ca(n)             |                      |              |              |      |
| PGC_SCZ wave3 eur only                             | 18        | 1.00        | 2.78e-07        | 0.442(53386)        | 0.424(77258)         | 0.045        | 0.009        |      |
| PGC_SCZ wave3 asn only                             | 3         | 1.00        | 0.00216         | 0.809(14004)        | 0.8(16757)           | 0.066        | 0.022        |      |
| PGC_SCZ afram only                                 | -         | 0.97        | 0.578           | -(6152)             | 0.794(3918)          | 0.021        | 0.037        |      |
| PGC_SCZ latino only                                | -         | 0.98        | 0.137           | -(1234)             | 0.559(3090)          | -0.075       | 0.05         |      |
| PGC_SCZ wave2 only                                 | 13        | 1.00        | 2.45e-05        | 0.455(34850)        | 0.428(44347)         | 0.047        | 0.011        |      |
| PGC_SCZ wave3 (excl. wave2)                        | 8         | 0.99        | 0.000219        | 0.622(39926)        | 0.586(56676)         | 0.041        | 0.011        |      |
| <b>PGC_SCZ wave3 (incl. wave2)</b>                 | <b>21</b> | <b>0.99</b> | <b>2.53e-08</b> | <b>0.556(74776)</b> | <b>0.525(101023)</b> | <b>0.044</b> | <b>0.008</b> |      |
| Decode – Replication                               | -         | 1.00        | 0.0287          | 0.469(1979)         | 0.456(142627)        | 0.083        | 0.038        |      |
| <b>PGC_SCZ wave3 (incl. wave2 and replication)</b> | <b>21</b> | <b>1.00</b> | <b>3.3e-09</b>  | <b>0.554(76755)</b> | <b>0.487(243650)</b> | <b>0.045</b> | <b>0.008</b> |      |

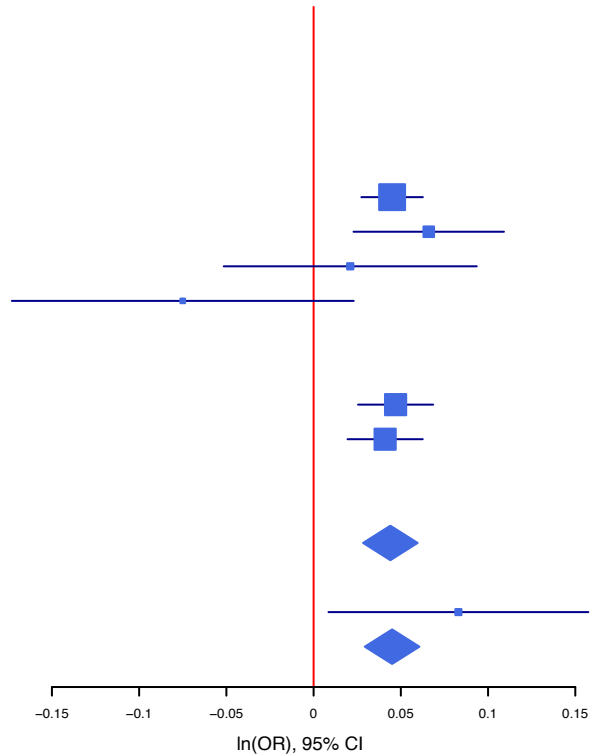

**rs9687282**                      **T/G**                      **5:139065988**  
 --+                                      het\_P:                      0.669    het\_I:                      0.0

|                                                    | ngt      | info        | p_value         | f_ca(n)             | f_co(n)              | ln(OR)        | STDerr       |
|----------------------------------------------------|----------|-------------|-----------------|---------------------|----------------------|---------------|--------------|
| PGC_SCZ wave3 eur only                             | 1        | 0.99        | 7.33e-09        | 0.65(53386)         | 0.666(77258)         | -0.053        | 0.009        |
| PGC_SCZ wave3 asn only                             | 0        | 0.94        | 0.595           | 0.874(14004)        | 0.877(16757)         | -0.014        | 0.027        |
| PGC_SCZ afram only                                 | -        | 0.96        | 0.129           | -(6152)             | 0.309(3918)          | -0.05         | 0.033        |
| PGC_SCZ latino only                                | -        | 1.02        | 0.963           | -(1234)             | 0.741(3090)          | 0.003         | 0.057        |
| PGC_SCZ wave2 only                                 | 1        | 0.99        | 1.44e-06        | 0.666(34850)        | 0.673(44347)         | -0.056        | 0.012        |
| PGC_SCZ wave3 (excl. wave2)                        | 0        | 0.98        | 0.000823        | 0.649(39926)        | 0.669(56676)         | -0.039        | 0.012        |
| <b>PGC_SCZ wave3 (incl. wave2)</b>                 | <b>1</b> | <b>0.99</b> | <b>7.34e-09</b> | <b>0.656(74776)</b> | <b>0.671(101023)</b> | <b>-0.048</b> | <b>0.008</b> |
| Decode – Replication                               | -        | 1.00        | 0.257           | 0.666(1979)         | 0.666(142627)        | -0.046        | 0.04         |
| <b>PGC_SCZ wave3 (incl. wave2 and replication)</b> | <b>1</b> | <b>0.99</b> | <b>3.34e-09</b> | <b>0.656(76755)</b> | <b>0.668(243650)</b> | <b>-0.048</b> | <b>0.008</b> |

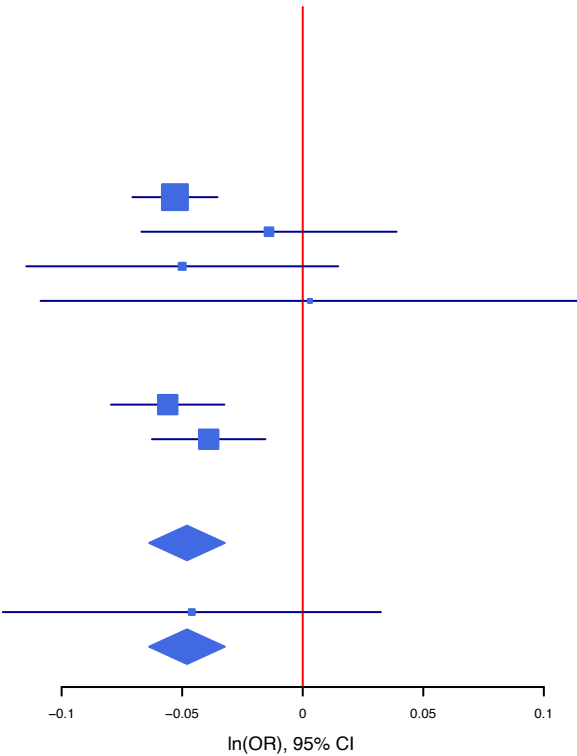



rs7141857                      T/C                      14:84664288  
 ---+                      het\_P:                      0.141    het\_I:                      49.0

|                                                    | ngt      | info        | p_value         | f_ca(n)             | f_co(n)              | ln(OR)        | STDerr       |
|----------------------------------------------------|----------|-------------|-----------------|---------------------|----------------------|---------------|--------------|
| PGC_SCZ wave3 eur only                             | 7        | 1.00        | 2.15e-06        | 0.386(53386)        | 0.401(77258)         | -0.042        | 0.009        |
| PGC_SCZ wave3 asn only                             | 2        | 0.97        | 0.00361         | 0.222(14004)        | 0.229(16757)         | -0.06         | 0.021        |
| PGC_SCZ afram only                                 | -        | 0.96        | 0.0191          | -(6152)             | 0.497(3918)          | -0.07         | 0.03         |
| PGC_SCZ latino only                                | -        | 1.00        | 0.351           | -(1234)             | 0.348(3090)          | 0.049         | 0.052        |
| PGC_SCZ wave2 only                                 | 1        | 0.99        | 7e-05           | 0.384(34850)        | 0.406(44347)         | -0.044        | 0.011        |
| PGC_SCZ wave3 (excl. wave2)                        | 8        | 0.99        | 3.94e-05        | 0.359(39926)        | 0.363(56676)         | -0.044        | 0.011        |
| <b>PGC_SCZ wave3 (incl. wave2)</b>                 | <b>9</b> | <b>0.99</b> | <b>9.14e-09</b> | <b>0.369(74776)</b> | <b>0.38(101023)</b>  | <b>-0.044</b> | <b>0.008</b> |
| Decode – Replication                               | -        | 1.00        | 0.185           | 0.386(1979)         | 0.371(142627)        | -0.053        | 0.04         |
| <b>PGC_SCZ wave3 (incl. wave2 and replication)</b> | <b>9</b> | <b>1.00</b> | <b>3.36e-09</b> | <b>0.369(76755)</b> | <b>0.375(243650)</b> | <b>-0.045</b> | <b>0.008</b> |

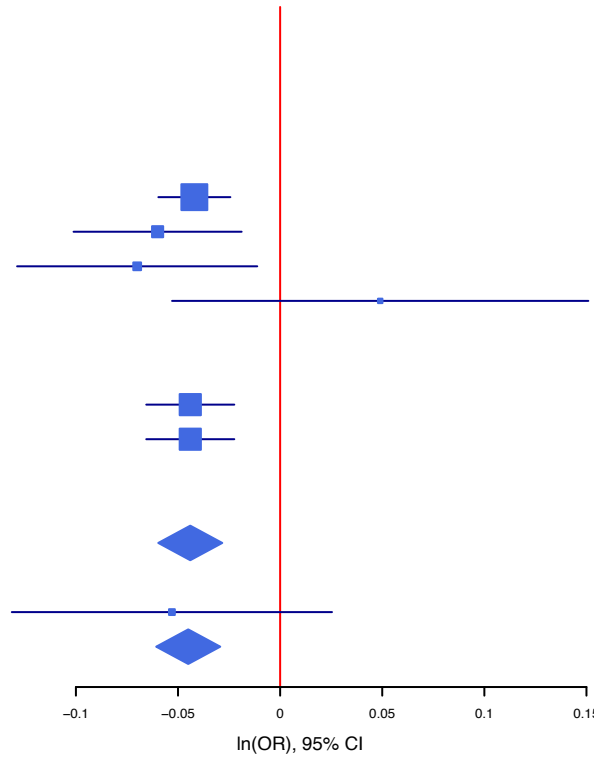

rs59971314                      G/C                      3:63914618  
 +++                      het\_P:                      0.388    het\_I:                      0.0

|                                                    | ngt      | info        | p_value         | f_ca(n)             | f_co(n)              | ln(OR)        | STDerr       |
|----------------------------------------------------|----------|-------------|-----------------|---------------------|----------------------|---------------|--------------|
| PGC_SCZ wave3 eur only                             | 5        | 1.00        | 9.14e-10        | 0.696(53386)        | 0.708(77258)         | -0.058        | 0.009        |
| PGC_SCZ wave3 asn only                             | 0        | 0.94        | 0.259           | 0.588(14004)        | 0.591(16757)         | -0.02         | 0.018        |
| PGC_SCZ afram only                                 | -        | 0.98        | 0.799           | -(6152)             | 0.454(3918)          | -0.008        | 0.03         |
| PGC_SCZ latino only                                | -        | 1.01        | 0.599           | -(1234)             | 0.791(3090)          | -0.032        | 0.06         |
| PGC_SCZ wave2 only                                 | 0        | 1.00        | 3.61e-08        | 0.692(34850)        | 0.706(44347)         | -0.065        | 0.012        |
| PGC_SCZ wave3 (excl. wave2)                        | 5        | 0.98        | 0.00444         | 0.641(39926)        | 0.656(56676)         | -0.031        | 0.011        |
| <b>PGC_SCZ wave3 (incl. wave2)</b>                 | <b>5</b> | <b>0.99</b> | <b>5.88e-09</b> | <b>0.661(74776)</b> | <b>0.675(101023)</b> | <b>-0.046</b> | <b>0.008</b> |
| Decode – Replication                               | -        | 1.00        | 0.338           | 0.7(1979)           | 0.685(142627)        | -0.04         | 0.042        |
| <b>PGC_SCZ wave3 (incl. wave2 and replication)</b> | <b>5</b> | <b>0.99</b> | <b>3.39e-09</b> | <b>0.662(76755)</b> | <b>0.681(243650)</b> | <b>-0.046</b> | <b>0.008</b> |

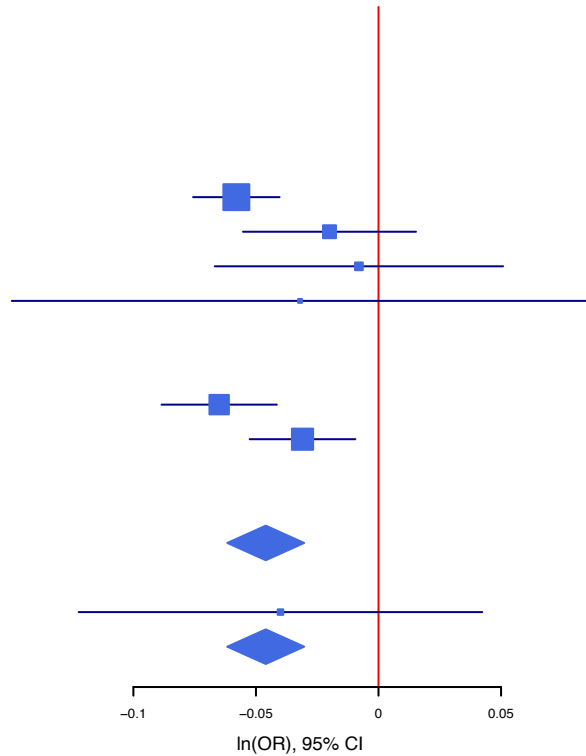

|                                                    | G/T       |             | 4:24269622      |                     | het_P:               | 0.654         | het_I:       | 0.0 |
|----------------------------------------------------|-----------|-------------|-----------------|---------------------|----------------------|---------------|--------------|-----|
|                                                    | ngt       | info        | p_value         | f_ca(n)             |                      |               |              |     |
| PGC_SCZ wave3 eur only                             | 34        | 1.00        | 3.86e-05        | 0.598(53386)        | 0.608(77258)         | -0.036        | 0.009        |     |
| PGC_SCZ wave3 asn only                             | 8         | 0.96        | 9.68e-06        | 0.363(14004)        | 0.378(16757)         | -0.079        | 0.018        |     |
| PGC_SCZ afram only                                 | -         | 0.97        | 0.504           | -(6152)             | 0.418(3918)          | -0.02         | 0.03         |     |
| PGC_SCZ latino only                                | -         | 1.02        | 0.187           | -(1234)             | 0.368(3090)          | -0.068        | 0.052        |     |
| PGC_SCZ wave2 only                                 | 32        | 1.00        | 0.00113         | 0.587(34850)        | 0.604(44347)         | -0.036        | 0.011        |     |
| PGC_SCZ wave3 (excl. wave2)                        | 10        | 0.98        | 1.28e-06        | 0.463(39926)        | 0.491(56676)         | -0.05         | 0.01         |     |
| <b>PGC_SCZ wave3 (incl. wave2)</b>                 | <b>42</b> | <b>0.99</b> | <b>8.28e-09</b> | <b>0.511(74776)</b> | <b>0.535(101023)</b> | <b>-0.044</b> | <b>0.008</b> |     |
| Decode – Replication                               | -         | 1.00        | 0.145           | 0.597(1979)         | 0.609(142627)        | -0.056        | 0.039        |     |
| <b>PGC_SCZ wave3 (incl. wave2 and replication)</b> | <b>42</b> | <b>1.00</b> | <b>3.42e-09</b> | <b>0.513(76755)</b> | <b>0.576(243650)</b> | <b>-0.044</b> | <b>0.008</b> |     |

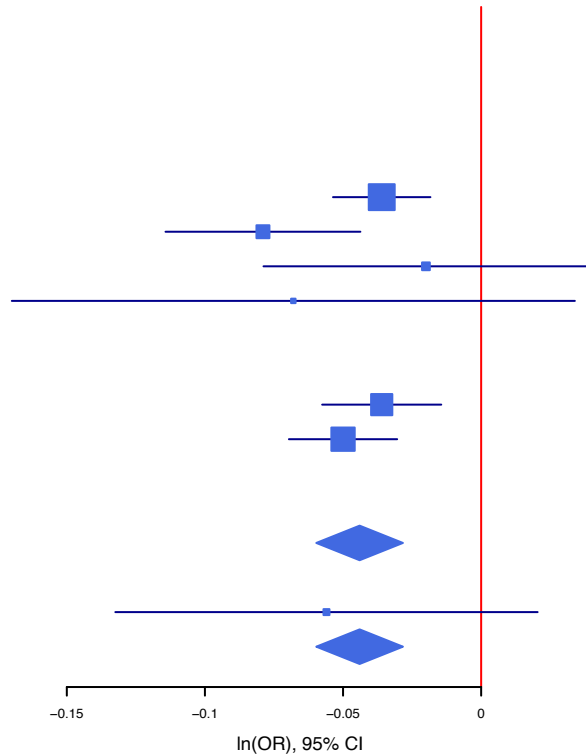

|                                                    | G/T      |             | 2:156835793     |                     | het_P:               | 0.254        | het_I:       | 27.1 |
|----------------------------------------------------|----------|-------------|-----------------|---------------------|----------------------|--------------|--------------|------|
|                                                    | ngt      | info        | p_value         | f_ca(n)             |                      |              |              |      |
| PGC_SCZ wave3 eur only                             | 1        | 0.99        | 3.39e-08        | 0.67(53386)         | 0.66(77258)          | 0.051        | 0.009        |      |
| PGC_SCZ wave3 asn only                             | 0        | 0.94        | 0.271           | 0.593(14004)        | 0.586(16757)         | 0.019        | 0.018        |      |
| PGC_SCZ afram only                                 | -        | 0.99        | 0.857           | -(6152)             | 0.913(3918)          | -0.01        | 0.053        |      |
| PGC_SCZ latino only                                | -        | 1.00        | 0.0286          | -(1234)             | 0.521(3090)          | 0.111        | 0.051        |      |
| PGC_SCZ wave2 only                                 | 1        | 0.99        | 5.67e-05        | 0.667(34850)        | 0.66(44347)          | 0.047        | 0.012        |      |
| PGC_SCZ wave3 (excl. wave2)                        | 0        | 0.98        | 9.91e-05        | 0.671(39926)        | 0.659(56676)         | 0.043        | 0.011        |      |
| <b>PGC_SCZ wave3 (incl. wave2)</b>                 | <b>1</b> | <b>0.98</b> | <b>1.92e-08</b> | <b>0.669(74776)</b> | <b>0.66(101023)</b>  | <b>0.044</b> | <b>0.008</b> |      |
| Decode – Replication                               | -        | 1.00        | 0.0477          | 0.658(1979)         | 0.665(142627)        | 0.08         | 0.04         |      |
| <b>PGC_SCZ wave3 (incl. wave2 and replication)</b> | <b>1</b> | <b>0.99</b> | <b>3.73e-09</b> | <b>0.669(76755)</b> | <b>0.663(243650)</b> | <b>0.046</b> | <b>0.008</b> |      |

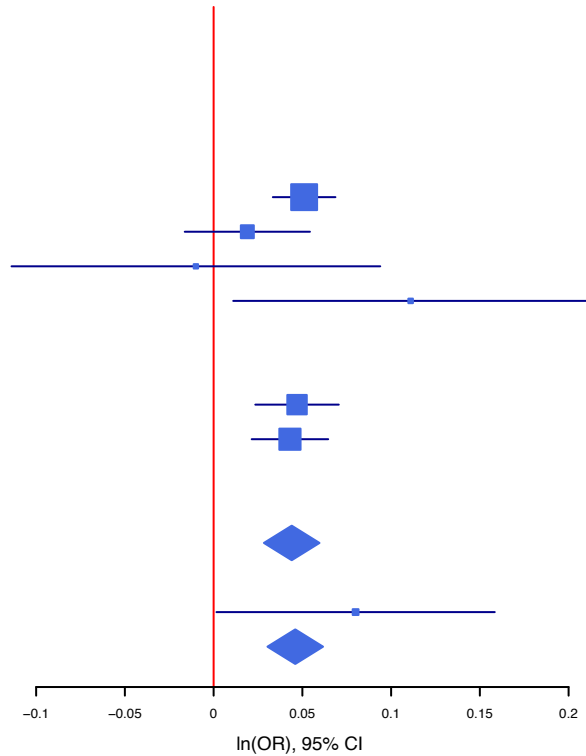

| rs1434281                                          | G/A      |             | 8:103671080     |                     | het_P:               | 0.527        | het_I:       | 0.0 |
|----------------------------------------------------|----------|-------------|-----------------|---------------------|----------------------|--------------|--------------|-----|
|                                                    | ngt      | info        | p_value         | f_ca(n)             |                      |              |              |     |
| PGC_SCZ wave3 eur only                             | 0        | 1.00        | 7.81e-07        | 0.647(53386)        | 0.638(77258)         | 0.044        | 0.009        |     |
| PGC_SCZ wave3 asn only                             | 0        | 0.94        | 0.00136         | 0.796(14004)        | 0.791(16757)         | 0.069        | 0.022        |     |
| PGC_SCZ afram only                                 | -        | 1.00        | 0.54            | -(6152)             | 0.735(3918)          | 0.02         | 0.033        |     |
| PGC_SCZ latino only                                | -        | 1.00        | 0.957           | -(1234)             | 0.716(3090)          | 0.003        | 0.055        |     |
| PGC_SCZ wave2 only                                 | 0        | 1.00        | 2.58e-05        | 0.656(34850)        | 0.641(44347)         | 0.048        | 0.011        |     |
| PGC_SCZ wave3 (excl. wave2)                        | 0        | 0.98        | 0.000107        | 0.711(39926)        | 0.699(56676)         | 0.043        | 0.011        |     |
| <b>PGC_SCZ wave3 (incl. wave2)</b>                 | <b>0</b> | <b>0.99</b> | <b>1.08e-08</b> | <b>0.689(74776)</b> | <b>0.677(101023)</b> | <b>0.045</b> | <b>0.008</b> |     |
| Decode – Replication                               | -        | 1.00        | 0.108           | 0.651(1979)         | 0.652(142627)        | 0.064        | 0.04         |     |
| <b>PGC_SCZ wave3 (incl. wave2 and replication)</b> | <b>0</b> | <b>0.99</b> | <b>3.82e-09</b> | <b>0.688(76755)</b> | <b>0.663(243650)</b> | <b>0.046</b> | <b>0.008</b> |     |

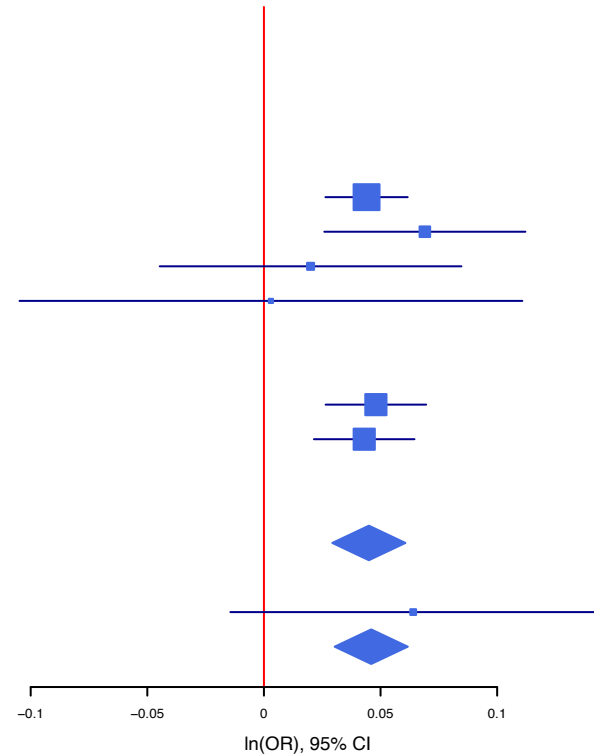

| rs7515363                                          | C/T      |             | 1:200414959     |                     | het_P:               | 0.108        | het_I:       | 55.1 |
|----------------------------------------------------|----------|-------------|-----------------|---------------------|----------------------|--------------|--------------|------|
|                                                    | ngt      | info        | p_value         | f_ca(n)             |                      |              |              |      |
| PGC_SCZ wave3 eur only                             | 0        | 0.98        | 1.84e-09        | 0.389(53386)        | 0.381(77258)         | 0.054        | 0.009        |      |
| PGC_SCZ wave3 asn only                             | 0        | 0.93        | 0.603           | 0.102(14004)        | 0.097(16757)         | 0.016        | 0.03         |      |
| PGC_SCZ afram only                                 | -        | 0.94        | 0.29            | -(6152)             | 0.083(3918)          | -0.059       | 0.056        |      |
| PGC_SCZ latino only                                | -        | 0.99        | 0.0852          | -(1234)             | 0.284(3090)          | 0.094        | 0.055        |      |
| PGC_SCZ wave2 only                                 | 0        | 0.98        | 5.11e-05        | 0.374(34850)        | 0.376(44347)         | 0.046        | 0.011        |      |
| PGC_SCZ wave3 (excl. wave2)                        | 0        | 0.97        | 1.86e-05        | 0.242(39926)        | 0.258(56676)         | 0.053        | 0.012        |      |
| <b>PGC_SCZ wave3 (incl. wave2)</b>                 | <b>0</b> | <b>0.97</b> | <b>3.43e-09</b> | <b>0.294(74776)</b> | <b>0.303(101023)</b> | <b>0.049</b> | <b>0.008</b> |      |
| Decode – Replication                               | -        | 1.00        | 0.626           | 0.377(1979)         | 0.384(142627)        | 0.019        | 0.039        |      |
| <b>PGC_SCZ wave3 (incl. wave2 and replication)</b> | <b>0</b> | <b>0.99</b> | <b>3.89e-09</b> | <b>0.296(76755)</b> | <b>0.348(243650)</b> | <b>0.048</b> | <b>0.008</b> |      |

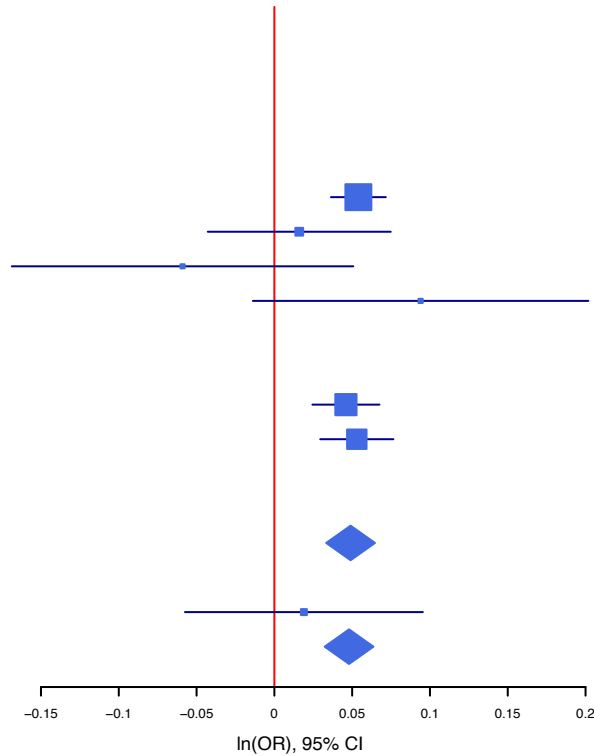

| rs3810450                                          | T/C      |             | 19:36530562     |                     |                      |              |              |
|----------------------------------------------------|----------|-------------|-----------------|---------------------|----------------------|--------------|--------------|
|                                                    | ++-      | het_P:      | 0.019           | het_I:              | 74.8                 |              |              |
|                                                    | ngt      | info        | p_value         | f_ca(n)             | f_co(n)              | ln(OR)       | STDerr       |
| PGC_SCZ wave3 eur only                             | 1        | 0.97        | 9.14e-05        | 0.967(53386)        | 0.963(77258)         | 0.095        | 0.024        |
| PGC_SCZ wave3 asn only                             | 1        | 0.94        | 2.3e-05         | 0.801(14004)        | 0.789(16757)         | 0.091        | 0.021        |
| PGC_SCZ afram only                                 | -        | 0.99        | 0.0378          | -(6152)             | 0.99(3918)           | 0.294        | 0.141        |
| PGC_SCZ latino only                                | -        | 0.96        | 0.12            | -(1234)             | 0.934(3090)          | -0.162       | 0.104        |
| PGC_SCZ wave2 only                                 | 0        | 0.95        | 0.0243          | 0.956(34850)        | 0.959(44347)         | 0.064        | 0.028        |
| PGC_SCZ wave3 (excl. wave2)                        | 2        | 0.97        | 1.15e-07        | 0.929(39926)        | 0.924(56676)         | 0.101        | 0.019        |
| <b>PGC_SCZ wave3 (incl. wave2)</b>                 | <b>2</b> | <b>0.96</b> | <b>1.37e-08</b> | <b>0.939(74776)</b> | <b>0.937(101023)</b> | <b>0.089</b> | <b>0.016</b> |
| Decode – Replication                               | -        | 1.00        | 0.0768          | 0.976(1979)         | 0.975(142627)        | 0.195        | 0.11         |
| <b>PGC_SCZ wave3 (incl. wave2 and replication)</b> | <b>2</b> | <b>0.98</b> | <b>4.25e-09</b> | <b>0.94(76755)</b>  | <b>0.958(243650)</b> | <b>0.091</b> | <b>0.016</b> |

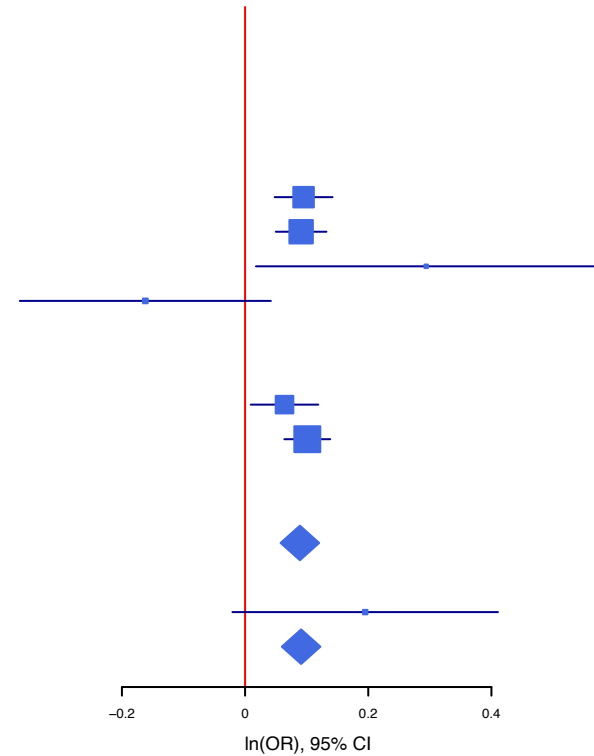

|                                                    | C/T      |             | 8:144933453     |                     | het_P:               | 0.756        | het_I:       | 0.0 |
|----------------------------------------------------|----------|-------------|-----------------|---------------------|----------------------|--------------|--------------|-----|
|                                                    | ngt      | info        | p_value         | f_ca(n)             |                      |              |              |     |
| PGC_SCZ wave3 eur only                             | 0        | 0.99        | 3.24e-09        | 0.444(53386)        | 0.43(77258)          | 0.052        | 0.009        |     |
| PGC_SCZ wave3 asn only                             | 0        | 0.75        | 0.94            | 0.645(14004)        | 0.646(16757)         | 0.001        | 0.02         |     |
| PGC_SCZ afram only                                 | -        | 0.97        | 0.69            | -(6152)             | 0.799(3918)          | 0.015        | 0.038        |     |
| PGC_SCZ latino only                                | -        | 0.88        | 0.441           | -(1234)             | 0.444(3090)          | 0.041        | 0.054        |     |
| PGC_SCZ wave2 only                                 | 0        | 0.99        | 9.13e-05        | 0.457(34850)        | 0.442(44347)         | 0.043        | 0.011        |     |
| PGC_SCZ wave3 (excl. wave2)                        | 0        | 0.91        | 0.000119        | 0.558(39926)        | 0.531(56676)         | 0.042        | 0.011        |     |
| <b>PGC_SCZ wave3 (incl. wave2)</b>                 | <b>0</b> | <b>0.94</b> | <b>3.68e-08</b> | <b>0.519(74776)</b> | <b>0.497(101023)</b> | <b>0.043</b> | <b>0.008</b> |     |
| Decode – Replication                               | -        | 1.00        | 0.0221          | 0.443(1979)         | 0.429(142627)        | 0.089        | 0.039        |     |
| <b>PGC_SCZ wave3 (incl. wave2 and replication)</b> | <b>0</b> | <b>0.97</b> | <b>4.29e-09</b> | <b>0.517(76755)</b> | <b>0.459(243650)</b> | <b>0.044</b> | <b>0.008</b> |     |

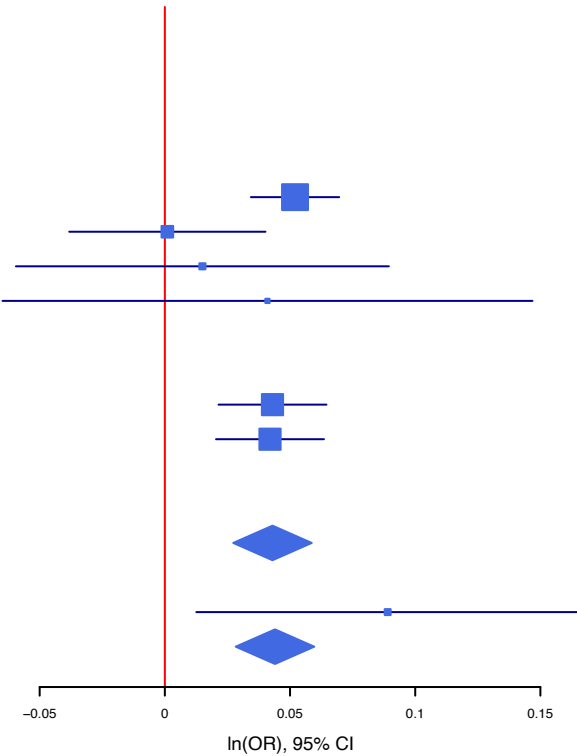



|                                                    | C/T       |             | 2:73157395      |                     | het_P:               | 0.799        | het_I:       | 0.0 |
|----------------------------------------------------|-----------|-------------|-----------------|---------------------|----------------------|--------------|--------------|-----|
|                                                    | ngt       | info        | p_value         | f_ca(n)             |                      |              |              |     |
| PGC_SCZ wave3 eur only                             | 79        | 0.99        | 2.61e-07        | 0.811(53386)        | 0.802(77258)         | 0.056        | 0.011        |     |
| PGC_SCZ wave3 asn only                             | 13        | 0.99        | 0.012           | 0.873(14004)        | 0.868(16757)         | 0.064        | 0.025        |     |
| PGC_SCZ afram only                                 | -         | 0.93        | 0.363           | -(6152)             | 0.805(3918)          | 0.035        | 0.038        |     |
| PGC_SCZ latino only                                | -         | 1.01        | 0.167           | -(1234)             | 0.649(3090)          | 0.075        | 0.054        |     |
| PGC_SCZ wave2 only                                 | 47        | 0.99        | 2.01e-06        | 0.819(34850)        | 0.808(44347)         | 0.066        | 0.014        |     |
| PGC_SCZ wave3 (excl. wave2)                        | 45        | 0.98        | 0.000258        | 0.789(39926)        | 0.792(56676)         | 0.048        | 0.013        |     |
| <b>PGC_SCZ wave3 (incl. wave2)</b>                 | <b>92</b> | <b>0.99</b> | <b>3.62e-09</b> | <b>0.801(74776)</b> | <b>0.798(101023)</b> | <b>0.057</b> | <b>0.01</b>  |     |
| Decode – Replication                               | -         | 1.00        | 0.67            | 0.823(1979)         | 0.81(142627)         | 0.02         | 0.046        |     |
| <b>PGC_SCZ wave3 (incl. wave2 and replication)</b> | <b>92</b> | <b>0.99</b> | <b>4.37e-09</b> | <b>0.801(76755)</b> | <b>0.805(243650)</b> | <b>0.055</b> | <b>0.009</b> |     |

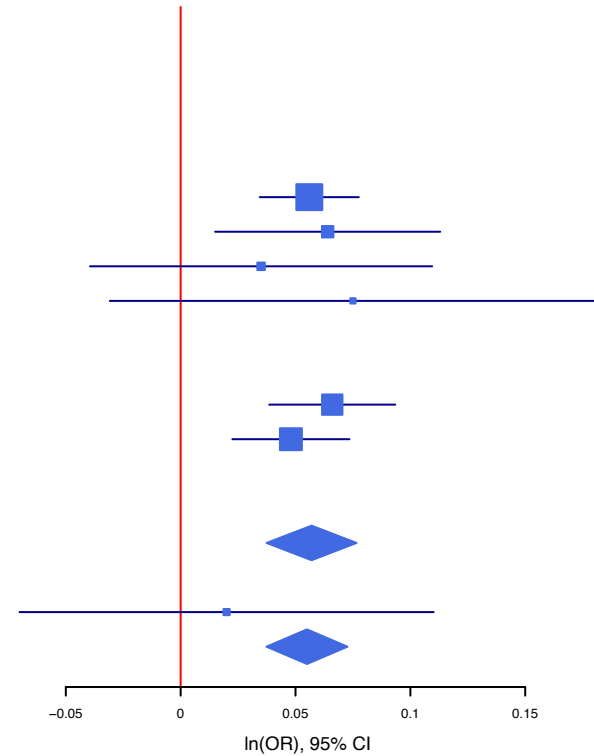

rs2917627

T/C  
---  
15:35072407  
het\_P: 0.498 het\_I: 0.0

|                                                    | ngt       | info        | p_value         | f_ca(n)            | f_co(n)              | ln(OR)        | STDerr       |
|----------------------------------------------------|-----------|-------------|-----------------|--------------------|----------------------|---------------|--------------|
| PGC_SCZ wave3 eur only                             | 12        | 0.98        | 2.96e-07        | 0.848(53386)       | 0.853(77258)         | -0.062        | 0.012        |
| PGC_SCZ afram only                                 | -         | 0.91        | 0.0385          | -(6152)            | 0.939(3918)          | -0.134        | 0.065        |
| PGC_SCZ latino only                                | -         | 0.98        | 0.282           | -(1234)            | 0.924(3090)          | -0.099        | 0.092        |
| PGC_SCZ wave2 only                                 | 12        | 0.98        | 0.0008          | 0.848(34850)       | 0.853(44347)         | -0.052        | 0.016        |
| PGC_SCZ wave3 (excl. wave2)                        | 0         | 0.95        | 1.23e-05        | 0.892(39926)       | 0.884(56676)         | -0.079        | 0.018        |
| <b>PGC_SCZ wave3 (incl. wave2)</b>                 | <b>12</b> | <b>0.96</b> | <b>6.8e-08</b>  | <b>0.87(74776)</b> | <b>0.868(101023)</b> | <b>-0.064</b> | <b>0.012</b> |
| Decode - Replication                               | -         | 1.00        | 0.00676         | 0.873(1979)        | 0.855(142627)        | -0.139        | 0.051        |
| <b>PGC_SCZ wave3 (incl. wave2 and replication)</b> | <b>12</b> | <b>0.98</b> | <b>4.39e-09</b> | <b>0.87(76755)</b> | <b>0.861(243650)</b> | <b>-0.067</b> | <b>0.012</b> |

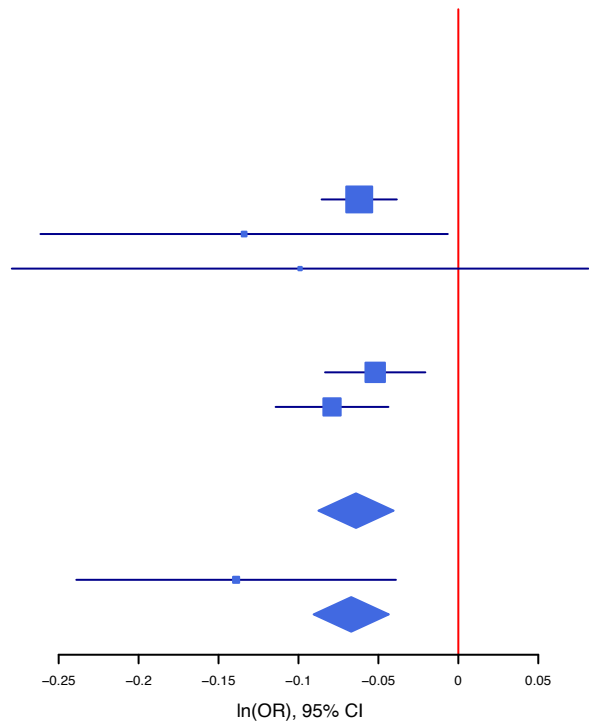

| rs653765                                           | T/C       |             | 15:59042012     |                     | het_P:               | 0.258        | het_I:       | 26.2 |
|----------------------------------------------------|-----------|-------------|-----------------|---------------------|----------------------|--------------|--------------|------|
|                                                    | ngt       | info        | p_value         | f_ca(n)             |                      |              |              |      |
| PGC_SCZ wave3 eur only                             | 14        | 0.99        | 6.67e-07        | 0.714(53386)        | 0.701(77258)         | 0.047        | 0.01         |      |
| PGC_SCZ wave3 asn only                             | 2         | 0.94        | 0.0572          | 0.211(14004)        | 0.2(16757)           | 0.043        | 0.023        |      |
| PGC_SCZ afram only                                 | -         | 0.97        | 0.00217         | -(6152)             | 0.307(3918)          | 0.1          | 0.033        |      |
| PGC_SCZ latino only                                | -         | 1.01        | 0.592           | -(1234)             | 0.481(3090)          | 0.027        | 0.051        |      |
| PGC_SCZ wave2 only                                 | 12        | 1.00        | 0.000316        | 0.682(34850)        | 0.686(44347)         | 0.043        | 0.012        |      |
| PGC_SCZ wave3 (excl. wave2)                        | 4         | 0.97        | 1.73e-06        | 0.477(39926)        | 0.5(56676)           | 0.056        | 0.012        |      |
| <b>PGC_SCZ wave3 (incl. wave2)</b>                 | <b>16</b> | <b>0.98</b> | <b>3.09e-09</b> | <b>0.557(74776)</b> | <b>0.572(101023)</b> | <b>0.05</b>  | <b>0.008</b> |      |
| Decode – Replication                               | -         | 1.00        | 0.725           | 0.7(1979)           | 0.686(142627)        | 0.015        | 0.041        |      |
| <b>PGC_SCZ wave3 (incl. wave2 and replication)</b> | <b>16</b> | <b>0.99</b> | <b>4.41e-09</b> | <b>0.56(76755)</b>  | <b>0.635(243650)</b> | <b>0.048</b> | <b>0.008</b> |      |

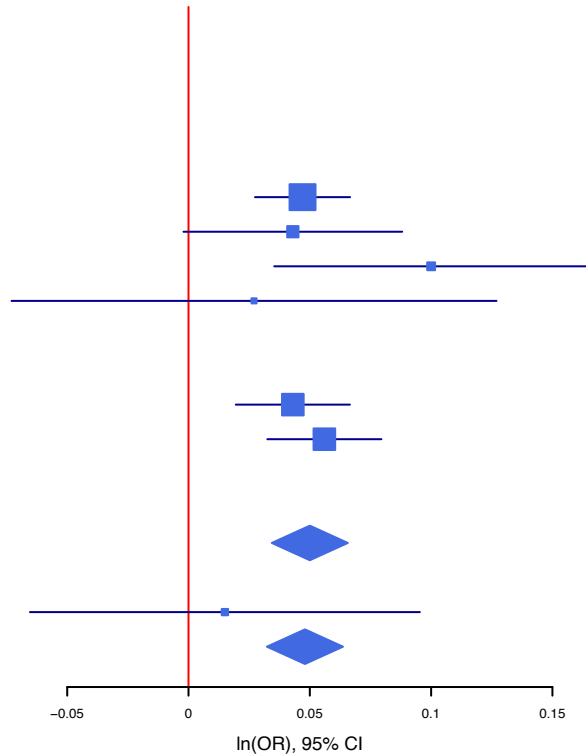

rs2381411                    T/C                    9:36319928  
 +-                    het\_P:                    0.185    het\_I:                    40.7

|                                                    | ngt      | info        | p_value         | f_ca(n)             | f_co(n)              | ln(OR)        | STDerr       |
|----------------------------------------------------|----------|-------------|-----------------|---------------------|----------------------|---------------|--------------|
| PGC_SCZ wave3 eur only                             | 8        | 0.98        | 1.25e-08        | 0.586(53386)        | 0.598(77258)         | -0.05         | 0.009        |
| PGC_SCZ wave3 asn only                             | 1        | 0.91        | 0.182           | 0.489(14004)        | 0.497(16757)         | -0.024        | 0.018        |
| PGC_SCZ afram only                                 | -        | 0.90        | 0.478           | -(6152)             | 0.821(3918)          | 0.029         | 0.04         |
| PGC_SCZ latino only                                | -        | 0.94        | 0.213           | -(1234)             | 0.565(3090)          | -0.064        | 0.052        |
| PGC_SCZ wave2 only                                 | 2        | 0.98        | 4.17e-05        | 0.582(34850)        | 0.595(44347)         | -0.046        | 0.011        |
| PGC_SCZ wave3 (excl. wave2)                        | 7        | 0.94        | 0.00015         | 0.606(39926)        | 0.605(56676)         | -0.04         | 0.011        |
| <b>PGC_SCZ wave3 (incl. wave2)</b>                 | <b>9</b> | <b>0.96</b> | <b>2.42e-08</b> | <b>0.596(74776)</b> | <b>0.601(101023)</b> | <b>-0.043</b> | <b>0.008</b> |
| Decode – Replication                               | -        | 1.00        | 0.0339          | 0.602(1979)         | 0.601(142627)        | -0.083        | 0.039        |
| <b>PGC_SCZ wave3 (incl. wave2 and replication)</b> | <b>9</b> | <b>0.98</b> | <b>4.49e-09</b> | <b>0.596(76755)</b> | <b>0.601(243650)</b> | <b>-0.044</b> | <b>0.008</b> |

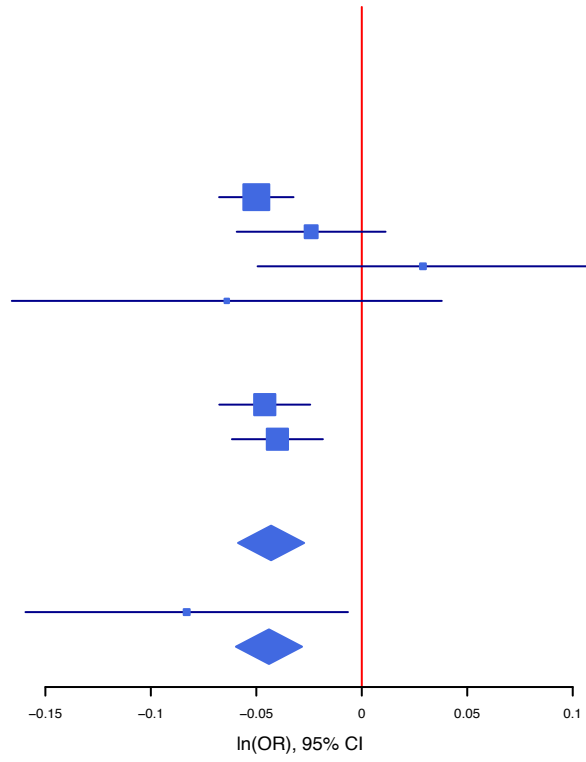

| rs498591                                           | A/T       |             | 9:14509105      |                    | het_P:               | 0.008         | het_I:      | 79.6 |
|----------------------------------------------------|-----------|-------------|-----------------|--------------------|----------------------|---------------|-------------|------|
|                                                    | +-        |             |                 |                    |                      |               |             |      |
|                                                    | ngt       | info        | p_value         | f_ca(n)            | f_co(n)              | ln(OR)        | STDerr      |      |
| PGC_SCZ wave3 eur only                             | 20        | 0.99        | 2.11e-09        | 0.847(53386)       | 0.854(77258)         | -0.072        | 0.012       |      |
| PGC_SCZ wave3 asn only                             | 8         | 0.95        | 0.117           | 0.889(14004)       | 0.892(16757)         | -0.044        | 0.028       |      |
| PGC_SCZ afram only                                 | -         | 0.96        | 0.294           | -(6152)            | 0.746(3918)          | 0.036         | 0.034       |      |
| PGC_SCZ latino only                                | -         | 1.03        | 0.0615          | -(1234)            | 0.919(3090)          | -0.162        | 0.087       |      |
| PGC_SCZ wave2 only                                 | 21        | 0.99        | 8.92e-05        | 0.849(34850)       | 0.853(44347)         | -0.06         | 0.015       |      |
| PGC_SCZ wave3 (excl. wave2)                        | 7         | 0.98        | 3.99e-05        | 0.851(39926)       | 0.857(56676)         | -0.059        | 0.014       |      |
| <b>PGC_SCZ wave3 (incl. wave2)</b>                 | <b>28</b> | <b>0.98</b> | <b>1.36e-08</b> | <b>0.85(74776)</b> | <b>0.856(101023)</b> | <b>-0.059</b> | <b>0.01</b> |      |
| Decode - Replication                               | -         | 1.00        | 0.147           | 0.857(1979)        | 0.861(142627)        | -0.077        | 0.053       |      |
| <b>PGC_SCZ wave3 (incl. wave2 and replication)</b> | <b>28</b> | <b>0.99</b> | <b>5.21e-09</b> | <b>0.85(76755)</b> | <b>0.859(243650)</b> | <b>-0.06</b>  | <b>0.01</b> |      |

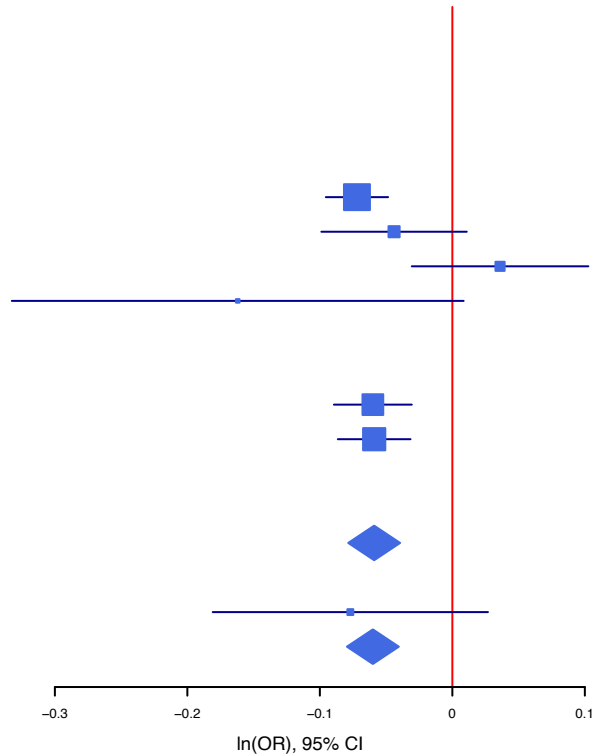

| rs2241033                                          | C/T      | 16:90109372 |                 |                     |                      |               |              |
|----------------------------------------------------|----------|-------------|-----------------|---------------------|----------------------|---------------|--------------|
|                                                    | +++      | het_P:      | 0.135           | het_I:              | 50.0                 |               |              |
|                                                    | ngt      | info        | p_value         | f_ca(n)             | f_co(n)              | ln(OR)        | STDerr       |
| PGC_SCZ wave3 eur only                             | 1        | 0.93        | 3.02e-08        | 0.351(53386)        | 0.364(77258)         | -0.052        | 0.009        |
| PGC_SCZ wave3 asn only                             | 0        | 0.88        | 0.502           | 0.762(14004)        | 0.768(16757)         | -0.015        | 0.022        |
| PGC_SCZ afram only                                 | -        | 0.96        | 0.736           | -(6152)             | 0.715(3918)          | -0.011        | 0.034        |
| PGC_SCZ latino only                                | -        | 0.98        | 0.00968         | -(1234)             | 0.591(3090)          | -0.136        | 0.052        |
| PGC_SCZ wave2 only                                 | 1        | 0.93        | 9.64e-05        | 0.377(34850)        | 0.377(44347)         | -0.046        | 0.012        |
| PGC_SCZ wave3 (excl. wave2)                        | 0        | 0.93        | 5.59e-05        | 0.561(39926)        | 0.539(56676)         | -0.046        | 0.012        |
| <b>PGC_SCZ wave3 (incl. wave2)</b>                 | <b>1</b> | <b>0.93</b> | <b>2.23e-08</b> | <b>0.489(74776)</b> | <b>0.476(101023)</b> | <b>-0.046</b> | <b>0.008</b> |
| Decode – Replication                               | -        | 1.00        | 0.089           | 0.339(1979)         | 0.336(142627)        | -0.067        | 0.04         |
| <b>PGC_SCZ wave3 (incl. wave2 and replication)</b> | <b>1</b> | <b>0.97</b> | <b>5.28e-09</b> | <b>0.486(76755)</b> | <b>0.399(243650)</b> | <b>-0.047</b> | <b>0.008</b> |

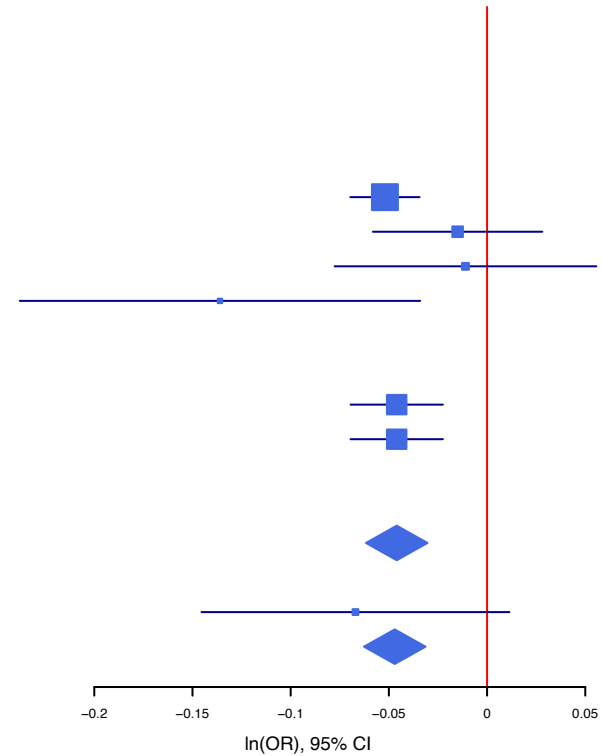

| rs322124                                           | C/G      |             | 19:11399372     |                     |                      |               |              |
|----------------------------------------------------|----------|-------------|-----------------|---------------------|----------------------|---------------|--------------|
|                                                    | --+      | het_P:      | 0.319           | het_I:              | 12.5                 |               |              |
|                                                    | ngt      | info        | p_value         | f_ca(n)             | f_co(n)              | ln(OR)        | STDerr       |
| PGC_SCZ wave3 eur only                             | 0        | 0.98        | 2.99e-07        | 0.788(53386)        | 0.796(77258)         | -0.055        | 0.011        |
| PGC_SCZ wave3 asn only                             | 0        | 0.94        | 0.00203         | 0.74(14004)         | 0.753(16757)         | -0.062        | 0.02         |
| PGC_SCZ afram only                                 | -        | 0.97        | 0.438           | -(6152)             | 0.612(3918)          | -0.024        | 0.03         |
| PGC_SCZ latino only                                | -        | 0.98        | 0.802           | -(1234)             | 0.792(3090)          | 0.015         | 0.062        |
| PGC_SCZ wave2 only                                 | 0        | 0.97        | 1.89e-05        | 0.784(34850)        | 0.792(44347)         | -0.058        | 0.014        |
| PGC_SCZ wave3 (excl. wave2)                        | 0        | 0.97        | 6.13e-05        | 0.744(39926)        | 0.759(56676)         | -0.048        | 0.012        |
| <b>PGC_SCZ wave3 (incl. wave2)</b>                 | <b>0</b> | <b>0.97</b> | <b>4.53e-09</b> | <b>0.76(74776)</b>  | <b>0.772(101023)</b> | <b>-0.052</b> | <b>0.009</b> |
| Decode – Replication                               | -        | 1.00        | 0.643           | 0.792(1979)         | 0.811(142627)        | -0.022        | 0.047        |
| <b>PGC_SCZ wave3 (incl. wave2 and replication)</b> | <b>0</b> | <b>0.99</b> | <b>5.3e-09</b>  | <b>0.761(76755)</b> | <b>0.793(243650)</b> | <b>-0.051</b> | <b>0.009</b> |

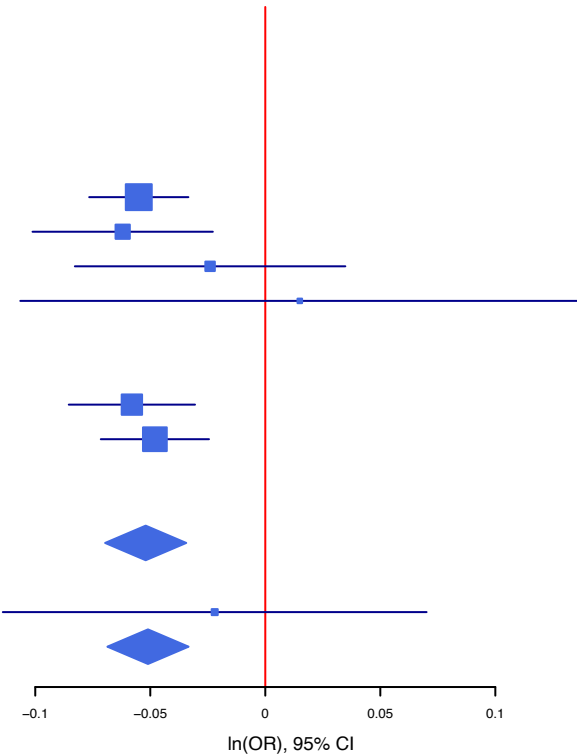

**rs758749**                      **C/T**                      **19:57189718**  
 +++                      het\_P:                      0.968    het\_I:                      0.0

|                                                    | ngt       | info        | p_value         | f_ca(n)             | f_co(n)              | ln(OR)        | STDerr       |
|----------------------------------------------------|-----------|-------------|-----------------|---------------------|----------------------|---------------|--------------|
| PGC_SCZ wave3 eur only                             | 13        | 0.96        | 1.29e-05        | 0.863(53386)        | 0.869(77258)         | -0.056        | 0.013        |
| PGC_SCZ wave3 asn only                             | 3         | 0.89        | 0.000672        | 0.813(14004)        | 0.825(16757)         | -0.079        | 0.023        |
| PGC_SCZ afram only                                 | -         | 0.93        | 0.197           | -(6152)             | 0.92(3918)           | -0.072        | 0.056        |
| PGC_SCZ latino only                                | -         | 0.99        | 0.572           | -(1234)             | 0.907(3090)          | -0.048        | 0.084        |
| PGC_SCZ wave2 only                                 | 11        | 0.95        | 0.00013         | 0.859(34850)        | 0.868(44347)         | -0.062        | 0.016        |
| PGC_SCZ wave3 (excl. wave2)                        | 5         | 0.95        | 3.48e-05        | 0.872(39926)        | 0.873(56676)         | -0.061        | 0.015        |
| <b>PGC_SCZ wave3 (incl. wave2)</b>                 | <b>16</b> | <b>0.95</b> | <b>1.49e-08</b> | <b>0.868(74776)</b> | <b>0.871(101023)</b> | <b>-0.062</b> | <b>0.011</b> |
| Decode – Replication                               | -         | 1.00        | 0.153           | 0.875(1979)         | 0.877(142627)        | -0.076        | 0.053        |
| <b>PGC_SCZ wave3 (incl. wave2 and replication)</b> | <b>16</b> | <b>0.98</b> | <b>5.45e-09</b> | <b>0.868(76755)</b> | <b>0.874(243650)</b> | <b>-0.062</b> | <b>0.011</b> |

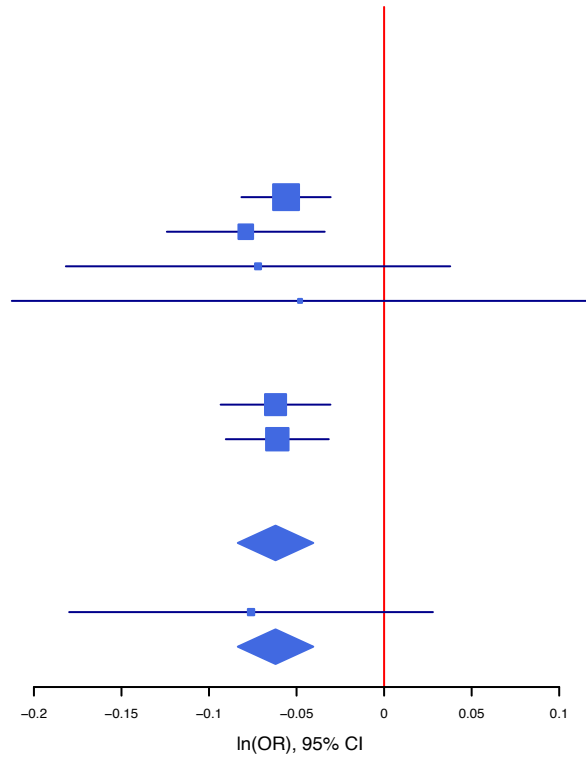



rs10173857

C/T  
--- het\_P: 0.867 het\_I: 0.0

ngt info p\_value f\_ca(n) f\_co(n) ln(OR) STDerr

PGC\_SCZ wave3 eur only 1 0.97 1.67e-07 0.725(53386) 0.71(77258) 0.051 0.01

PGC\_SCZ wave3 asn only 0 0.90 0.199 0.945(14004) 0.947(16757) 0.054 0.042

PGC\_SCZ afram only - 0.88 0.461 -(6152) 0.815(3918) 0.029 0.04

PGC\_SCZ latino only - 0.95 0.309 -(1234) 0.65(3090) 0.055 0.054

PGC\_SCZ wave2 only 1 0.97 2.76e-05 0.731(34850) 0.71(44347) 0.052 0.012

PGC\_SCZ wave3 (excl. wave2) 0 0.93 0.00035 0.781(39926) 0.772(56676) 0.048 0.014

**PGC\_SCZ wave3 (incl. wave2) 1 0.95 3.84e-08 0.761(74776) 0.748(101023) 0.05 0.009**

Decode - Replication - 1.00 0.037 0.73(1979) 0.736(142627) 0.087 0.042

**PGC\_SCZ wave3 (incl. wave2 and replication) 1 0.98 5.74e-09 0.76(76755) 0.741(243650) 0.052 0.009**

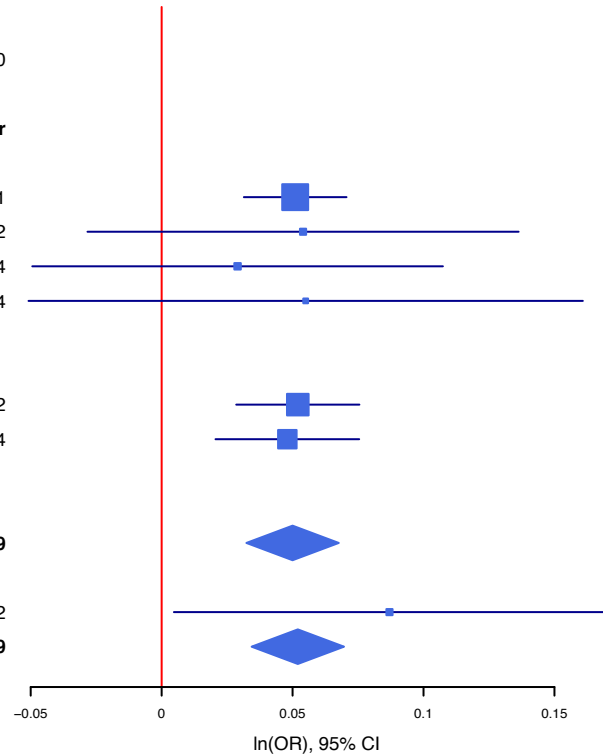

| rs12315638                                         | C/T       |             | 12:75340402     |                     | het_P:               | 0.03         | het_I:       | 71.4 |
|----------------------------------------------------|-----------|-------------|-----------------|---------------------|----------------------|--------------|--------------|------|
|                                                    | ngt       | info        | p_value         | f_ca(n)             |                      |              |              |      |
| PGC_SCZ wave3 eur only                             | 53        | 1.00        | 7.47e-07        | 0.679(53386)        | 0.67(77258)          | 0.045        | 0.009        |      |
| PGC_SCZ wave3 asn only                             | 9         | 1.00        | 0.126           | 0.645(14004)        | 0.636(16757)         | 0.027        | 0.018        |      |
| PGC_SCZ afram only                                 | -         | 1.00        | 0.000365        | -(6152)             | 0.284(3918)          | 0.119        | 0.033        |      |
| PGC_SCZ latino only                                | -         | 1.01        | 0.616           | -(1234)             | 0.65(3090)           | -0.026       | 0.052        |      |
| PGC_SCZ wave2 only                                 | 21        | 1.00        | 0.00405         | 0.674(34850)        | 0.667(44347)         | 0.033        | 0.012        |      |
| PGC_SCZ wave3 (excl. wave2)                        | 41        | 1.00        | 4.64e-07        | 0.589(39926)        | 0.602(56676)         | 0.054        | 0.011        |      |
| <b>PGC_SCZ wave3 (incl. wave2)</b>                 | <b>62</b> | <b>1.00</b> | <b>1.37e-08</b> | <b>0.623(74776)</b> | <b>0.627(101023)</b> | <b>0.044</b> | <b>0.008</b> |      |
| Decode – Replication                               | -         | 1.00        | 0.179           | 0.637(1979)         | 0.644(142627)        | 0.053        | 0.04         |      |
| <b>PGC_SCZ wave3 (incl. wave2 and replication)</b> | <b>62</b> | <b>1.00</b> | <b>5.9e-09</b>  | <b>0.623(76755)</b> | <b>0.636(243650)</b> | <b>0.044</b> | <b>0.008</b> |      |

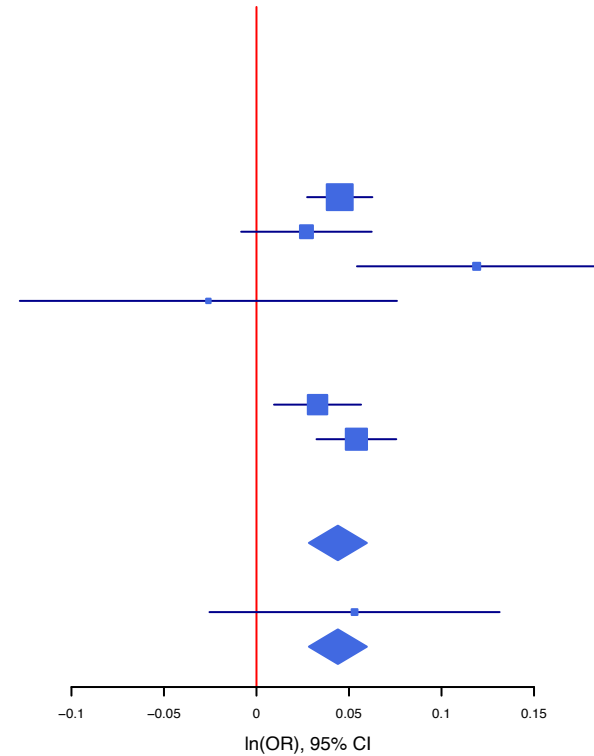

rs3900555                      G/A                      1:61063225  
 ++-                      het\_P:                      0.336    het\_I:                      8.4

|                                                    | ngt      | info        | p_value         | f_ca(n)             | f_co(n)              | ln(OR)        | STDerr       |
|----------------------------------------------------|----------|-------------|-----------------|---------------------|----------------------|---------------|--------------|
| PGC_SCZ wave3 eur only                             | 0        | 1.00        | 3.74e-07        | 0.512(53386)        | 0.525(77258)         | -0.044        | 0.009        |
| PGC_SCZ wave3 asn only                             | 0        | 0.98        | 0.0492          | 0.285(14004)        | 0.287(16757)         | -0.037        | 0.019        |
| PGC_SCZ afram only                                 | -        | 0.97        | 0.0265          | -(6152)             | 0.356(3918)          | -0.069        | 0.031        |
| PGC_SCZ latino only                                | -        | 1.03        | 0.692           | -(1234)             | 0.346(3090)          | 0.021         | 0.052        |
| PGC_SCZ wave2 only                                 | 0        | 1.00        | 9.5e-05         | 0.501(34850)        | 0.522(44347)         | -0.043        | 0.011        |
| PGC_SCZ wave3 (excl. wave2)                        | 0        | 0.99        | 3.29e-05        | 0.396(39926)        | 0.418(56676)         | -0.043        | 0.01         |
| <b>PGC_SCZ wave3 (incl. wave2)</b>                 | <b>0</b> | <b>1.00</b> | <b>9.95e-09</b> | <b>0.437(74776)</b> | <b>0.458(101023)</b> | <b>-0.043</b> | <b>0.008</b> |
| Decode – Replication                               | -        | 1.00        | 0.283           | 0.556(1979)         | 0.566(142627)        | -0.041        | 0.038        |
| <b>PGC_SCZ wave3 (incl. wave2 and replication)</b> | <b>0</b> | <b>1.00</b> | <b>5.92e-09</b> | <b>0.44(76755)</b>  | <b>0.518(243650)</b> | <b>-0.043</b> | <b>0.007</b> |

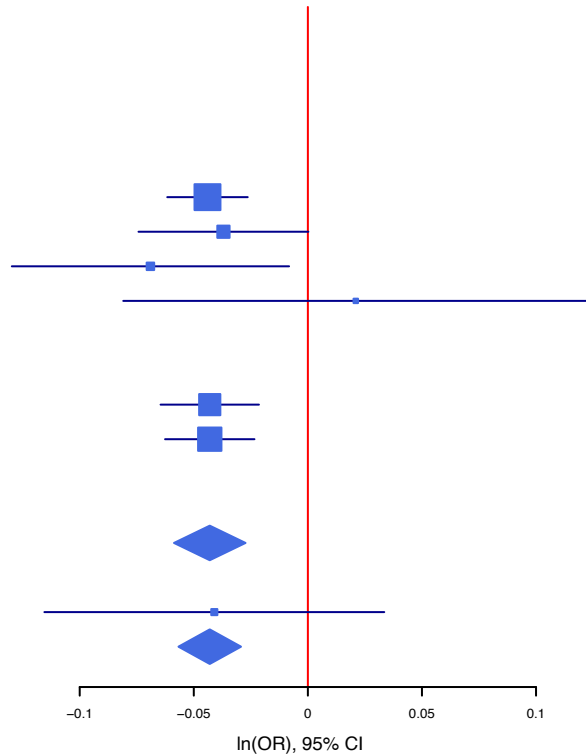

rs4653164 C/T 1:36627542  
 +++ het\_P: 0.013 het\_I: 76.8

|                                                    | ngt       | info        | p_value         | f_ca(n)             | f_co(n)              | ln(OR)        | STDerr       |
|----------------------------------------------------|-----------|-------------|-----------------|---------------------|----------------------|---------------|--------------|
| PGC_SCZ wave3 eur only                             | 19        | 0.99        | 3.08e-08        | 0.323(53386)        | 0.332(77258)         | -0.051        | 0.009        |
| PGC_SCZ wave3 asn only                             | 6         | 0.97        | 0.609           | 0.523(14004)        | 0.525(16757)         | -0.009        | 0.017        |
| PGC_SCZ afram only                                 | -         | 0.99        | 0.788           | -(6152)             | 0.636(3918)          | -0.008        | 0.031        |
| PGC_SCZ latino only                                | -         | 0.99        | 0.000374        | -(1234)             | 0.484(3090)          | -0.179        | 0.05         |
| PGC_SCZ wave2 only                                 | 19        | 0.99        | 3.73e-06        | 0.333(34850)        | 0.339(44347)         | -0.054        | 0.012        |
| PGC_SCZ wave3 (excl. wave2)                        | 6         | 0.98        | 0.00118         | 0.463(39926)        | 0.442(56676)         | -0.034        | 0.01         |
| <b>PGC_SCZ wave3 (incl. wave2)</b>                 | <b>25</b> | <b>0.99</b> | <b>3.16e-08</b> | <b>0.412(74776)</b> | <b>0.402(101023)</b> | <b>-0.043</b> | <b>0.008</b> |
| Decode – Replication                               | -         | 1.00        | 0.063           | 0.364(1979)         | 0.347(142627)        | -0.077        | 0.042        |
| <b>PGC_SCZ wave3 (incl. wave2 and replication)</b> | <b>25</b> | <b>0.99</b> | <b>6.45e-09</b> | <b>0.411(76755)</b> | <b>0.372(243650)</b> | <b>-0.044</b> | <b>0.008</b> |

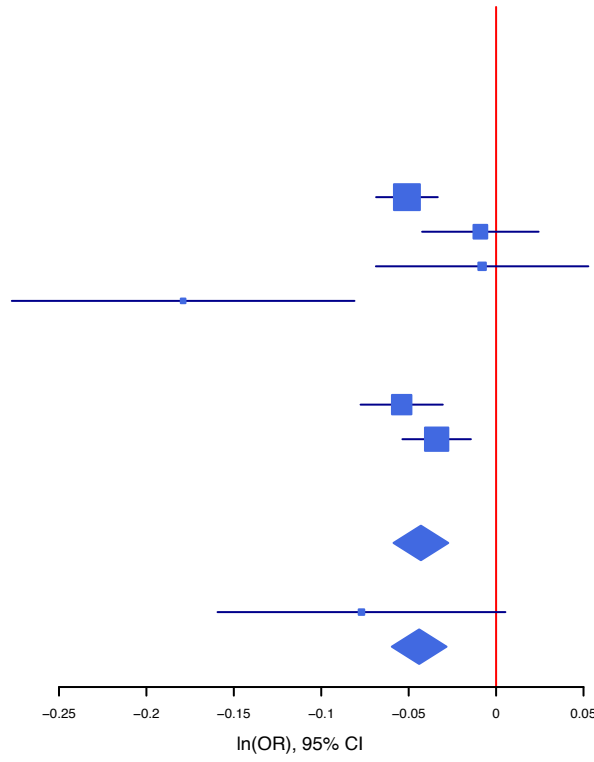

|                                                    | A/T      |             | 2:60389362      |                     | het_P:               | 0.789        | het_I:       | 0.0 |
|----------------------------------------------------|----------|-------------|-----------------|---------------------|----------------------|--------------|--------------|-----|
|                                                    | ngt      | info        | p_value         | f_ca(n)             |                      |              |              |     |
| PGC_SCZ wave3 eur only                             | 0        | 0.93        | 2.8e-08         | 0.711(53386)        | 0.702(77258)         | 0.054        | 0.01         |     |
| PGC_SCZ wave3 asn only                             | 0        | 0.82        | 0.088           | 0.594(14004)        | 0.585(16757)         | 0.033        | 0.019        |     |
| PGC_SCZ afram only                                 | -        | 0.85        | 0.629           | -(6152)             | 0.875(3918)          | 0.023        | 0.048        |     |
| PGC_SCZ latino only                                | -        | 0.95        | 0.175           | -(1234)             | 0.546(3090)          | 0.072        | 0.053        |     |
| PGC_SCZ wave2 only                                 | 0        | 0.95        | 6.4e-05         | 0.704(34850)        | 0.698(44347)         | 0.049        | 0.012        |     |
| PGC_SCZ wave3 (excl. wave2)                        | 0        | 0.89        | 1.85e-05        | 0.684(39926)        | 0.679(56676)         | 0.05         | 0.012        |     |
| <b>PGC_SCZ wave3 (incl. wave2)</b>                 | <b>0</b> | <b>0.91</b> | <b>4.58e-09</b> | <b>0.692(74776)</b> | <b>0.686(101023)</b> | <b>0.05</b>  | <b>0.008</b> |     |
| Decode – Replication                               | -        | 1.00        | 0.672           | 0.689(1979)         | 0.703(142627)        | 0.018        | 0.042        |     |
| <b>PGC_SCZ wave3 (incl. wave2 and replication)</b> | <b>0</b> | <b>0.96</b> | <b>6.49e-09</b> | <b>0.692(76755)</b> | <b>0.696(243650)</b> | <b>0.048</b> | <b>0.008</b> |     |

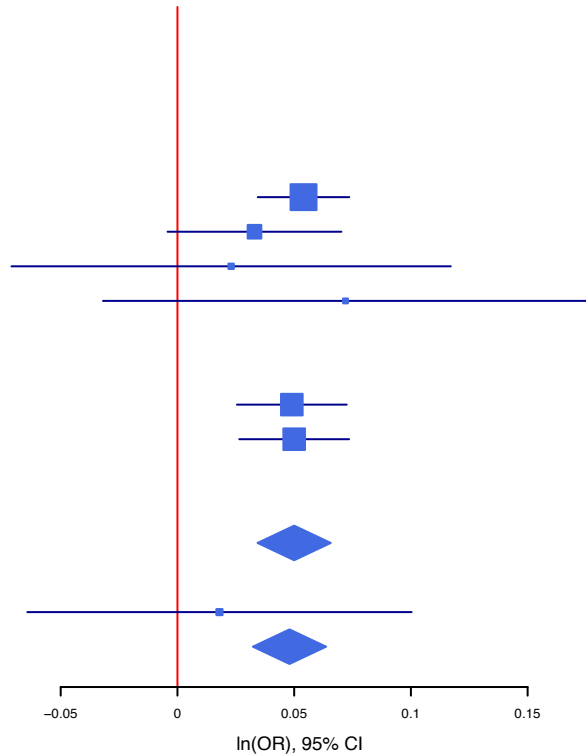

rs11191373

G/A  
---  
10:104463676  
het\_P: 0.206 het\_I: 36.8

|                                                    | ngt      | info        | p_value         | f_ca(n)             | f_co(n)              | ln(OR)       | STDerr       |
|----------------------------------------------------|----------|-------------|-----------------|---------------------|----------------------|--------------|--------------|
| PGC_SCZ wave3 eur only                             | 0        | 1.00        | 0.00686         | 0.618(53386)        | 0.609(77258)         | 0.024        | 0.009        |
| PGC_SCZ wave3 asn only                             | 0        | 0.99        | 1.68e-08        | 0.52(14004)         | 0.499(16757)         | 0.096        | 0.017        |
| PGC_SCZ afram only                                 | -        | 0.98        | 0.0071          | -(6152)             | 0.634(3918)          | 0.082        | 0.031        |
| PGC_SCZ latino only                                | -        | 1.02        | 0.0484          | -(1234)             | 0.433(3090)          | 0.1          | 0.051        |
| PGC_SCZ wave2 only                                 | 0        | 1.00        | 0.171           | 0.609(34850)        | 0.608(44347)         | 0.015        | 0.011        |
| PGC_SCZ wave3 (excl. wave2)                        | 0        | 0.99        | 5.88e-11        | 0.565(39926)        | 0.561(56676)         | 0.067        | 0.01         |
| <b>PGC_SCZ wave3 (incl. wave2)</b>                 | <b>0</b> | <b>1.00</b> | <b>8.19e-09</b> | <b>0.582(74776)</b> | <b>0.579(101023)</b> | <b>0.043</b> | <b>0.008</b> |
| Decode – Replication                               | -        | 1.00        | 0.406           | 0.612(1979)         | 0.637(142627)        | 0.031        | 0.038        |
| <b>PGC_SCZ wave3 (incl. wave2 and replication)</b> | <b>0</b> | <b>1.00</b> | <b>6.69e-09</b> | <b>0.583(76755)</b> | <b>0.611(243650)</b> | <b>0.043</b> | <b>0.007</b> |

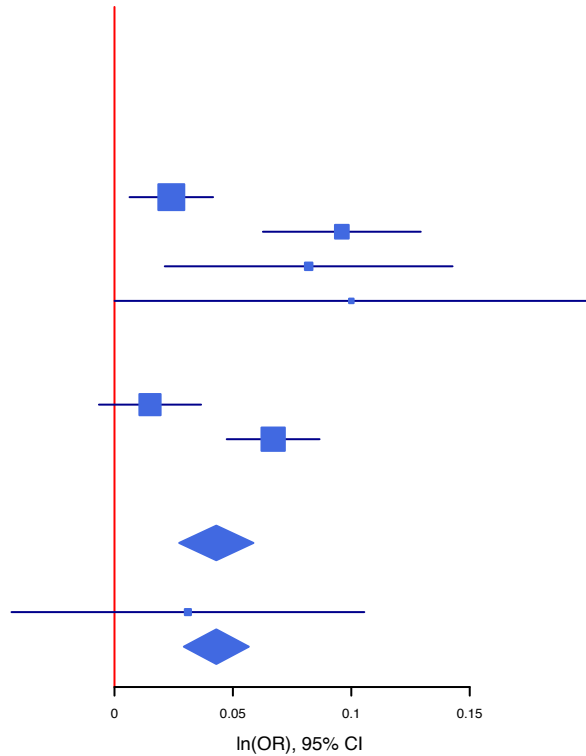

| rs12126806                                         | C/T       |             | 1:200963825     |                     | het_P:               | 0.778        | het_I:       | 0.0 |
|----------------------------------------------------|-----------|-------------|-----------------|---------------------|----------------------|--------------|--------------|-----|
|                                                    | ngt       | info        | p_value         | f_ca(n)             |                      |              |              |     |
| PGC_SCZ wave3 eur only                             | 14        | 1.00        | 4.42e-07        | 0.725(53386)        | 0.712(77258)         | 0.048        | 0.01         |     |
| PGC_SCZ wave3 asn only                             | 2         | 0.99        | 0.0193          | 0.879(14004)        | 0.873(16757)         | 0.061        | 0.026        |     |
| PGC_SCZ afram only                                 | -         | 0.96        | 0.07            | -(6152)             | 0.716(3918)          | 0.06         | 0.033        |     |
| PGC_SCZ latino only                                | -         | 0.99        | 0.852           | -(1234)             | 0.782(3090)          | 0.011        | 0.06         |     |
| PGC_SCZ wave2 only                                 | 8         | 1.00        | 1.43e-05        | 0.733(34850)        | 0.718(44347)         | 0.053        | 0.012        |     |
| PGC_SCZ wave3 (excl. wave2)                        | 8         | 0.99        | 0.000114        | 0.769(39926)        | 0.757(56676)         | 0.047        | 0.012        |     |
| <b>PGC_SCZ wave3 (incl. wave2)</b>                 | <b>16</b> | <b>0.99</b> | <b>6.91e-09</b> | <b>0.755(74776)</b> | <b>0.742(101023)</b> | <b>0.05</b>  | <b>0.009</b> |     |
| Decode – Replication                               | -         | 1.00        | 0.544           | 0.747(1979)         | 0.713(142627)        | 0.025        | 0.042        |     |
| <b>PGC_SCZ wave3 (incl. wave2 and replication)</b> | <b>16</b> | <b>1.00</b> | <b>6.88e-09</b> | <b>0.755(76755)</b> | <b>0.726(243650)</b> | <b>0.049</b> | <b>0.008</b> |     |

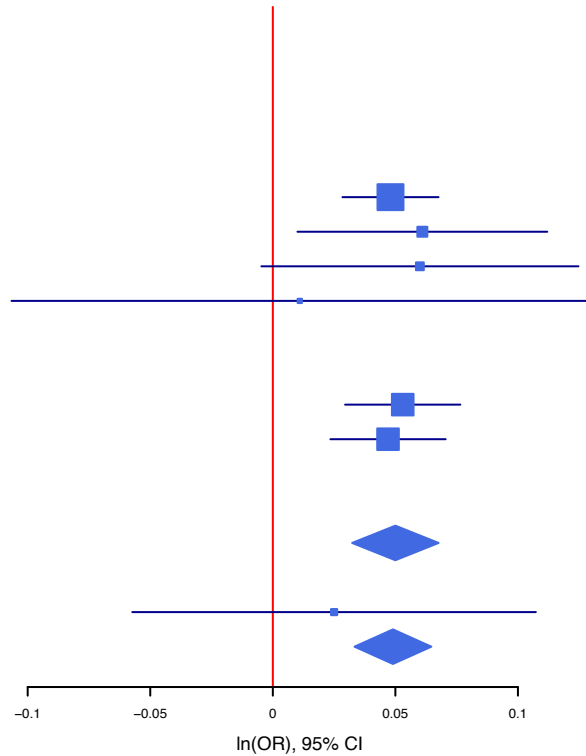

| rs650520                                           | G/T      |             | 13:38868178     |                    |                      |               |              |
|----------------------------------------------------|----------|-------------|-----------------|--------------------|----------------------|---------------|--------------|
|                                                    | ngt      | info        | p_value         | f_ca(n)            | f_co(n)              | ln(OR)        | STDerr       |
|                                                    |          | +           | ??              | het_P:             | 1.0                  | het_I:        | 0.0          |
| PGC_SCZ wave3 eur only                             | 0        | 0.97        | 2.65e-08        | 0.584(53386)       | 0.593(77258)         | -0.049        | 0.009        |
| PGC_SCZ wave3 asn only                             | 0        | 0.93        | 0.0786          | 0.755(14004)       | 0.759(16757)         | -0.036        | 0.021        |
| PGC_SCZ wave2 only                                 | 0        | 0.97        | 2.78e-05        | 0.593(34850)       | 0.597(44347)         | -0.047        | 0.011        |
| PGC_SCZ wave3 (excl. wave2)                        | 0        | 0.96        | 5.9e-05         | 0.648(39926)       | 0.645(56676)         | -0.047        | 0.012        |
| <b>PGC_SCZ wave3 (incl. wave2)</b>                 | <b>0</b> | <b>0.96</b> | <b>5.65e-09</b> | <b>0.62(74776)</b> | <b>0.623(101023)</b> | <b>-0.047</b> | <b>0.008</b> |
| Decode - Replication                               | -        | 0.99        | 0.975           | 0.616(1979)        | 0.619(142627)        | -0.002        | 0.063        |
| <b>PGC_SCZ wave3 (incl. wave2 and replication)</b> | <b>0</b> | <b>0.96</b> | <b>7.35e-09</b> | <b>0.62(76755)</b> | <b>0.623(243650)</b> | <b>-0.047</b> | <b>0.008</b> |

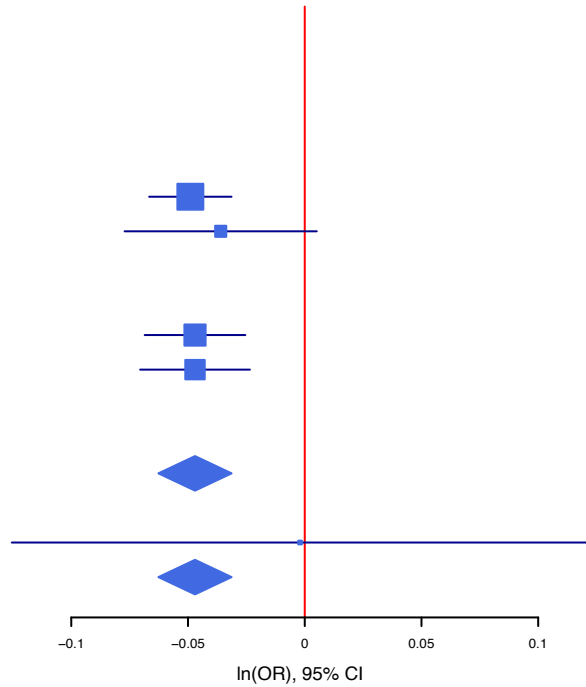



| rs876983                                           | T/C       |             | 8:18407858      |                     | het_P:               | 0.961        | het_I:       | 0.0 |
|----------------------------------------------------|-----------|-------------|-----------------|---------------------|----------------------|--------------|--------------|-----|
|                                                    | ngt       | info        | p_value         | f_ca(n)             |                      |              |              |     |
| PGC_SCZ wave3 eur only                             | 47        | 0.99        | 9.61e-08        | 0.478(53386)        | 0.466(77258)         | 0.046        | 0.009        |     |
| PGC_SCZ wave3 asn only                             | 5         | 0.93        | 0.179           | 0.737(14004)        | 0.729(16757)         | 0.027        | 0.02         |     |
| PGC_SCZ afram only                                 | -         | 1.01        | 0.236           | -(6152)             | 0.85(3918)           | 0.05         | 0.042        |     |
| PGC_SCZ latino only                                | -         | 1.02        | 0.274           | -(1234)             | 0.597(3090)          | 0.055        | 0.05         |     |
| PGC_SCZ wave2 only                                 | 12        | 0.99        | 1.89e-07        | 0.497(34850)        | 0.474(44347)         | 0.057        | 0.011        |     |
| PGC_SCZ wave3 (excl. wave2)                        | 40        | 0.99        | 0.00505         | 0.631(39926)        | 0.601(56676)         | 0.03         | 0.011        |     |
| <b>PGC_SCZ wave3 (incl. wave2)</b>                 | <b>52</b> | <b>0.99</b> | <b>1.42e-08</b> | <b>0.578(74776)</b> | <b>0.552(101023)</b> | <b>0.044</b> | <b>0.008</b> |     |
| Decode – Replication                               | -         | 1.00        | 0.219           | 0.481(1979)         | 0.459(142627)        | 0.047        | 0.038        |     |
| <b>PGC_SCZ wave3 (incl. wave2 and replication)</b> | <b>52</b> | <b>0.99</b> | <b>7.43e-09</b> | <b>0.576(76755)</b> | <b>0.501(243650)</b> | <b>0.044</b> | <b>0.008</b> |     |

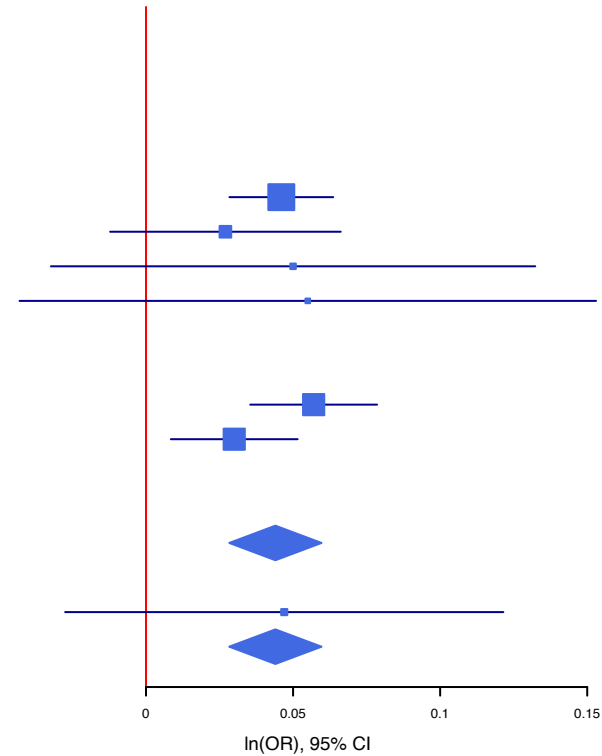

| rs4903718                                          | T/C       |             | 14:78647339     |                     | het_P:               | 0.748        | het_I:       | 0.0 |
|----------------------------------------------------|-----------|-------------|-----------------|---------------------|----------------------|--------------|--------------|-----|
|                                                    | ngt       | info        | p_value         | f_ca(n)             |                      |              |              |     |
| PGC_SCZ wave3 eur only                             | 12        | 0.99        | 0.000272        | 0.695(53386)        | 0.692(77258)         | 0.034        | 0.009        |     |
| PGC_SCZ wave3 asn only                             | 3         | 0.99        | 8.03e-05        | 0.663(14004)        | 0.641(16757)         | 0.071        | 0.018        |     |
| PGC_SCZ afram only                                 | -         | 1.00        | 0.0729          | -(6152)             | 0.818(3918)          | 0.068        | 0.038        |     |
| PGC_SCZ latino only                                | -         | 1.00        | 0.25            | -(1234)             | 0.707(3090)          | 0.063        | 0.055        |     |
| PGC_SCZ wave2 only                                 | 12        | 0.99        | 0.000916        | 0.696(34850)        | 0.692(44347)         | 0.039        | 0.012        |     |
| PGC_SCZ wave3 (excl. wave2)                        | 3         | 0.99        | 1.49e-05        | 0.713(39926)        | 0.701(56676)         | 0.047        | 0.011        |     |
| <b>PGC_SCZ wave3 (incl. wave2)</b>                 | <b>15</b> | <b>0.99</b> | <b>5.76e-08</b> | <b>0.707(74776)</b> | <b>0.698(101023)</b> | <b>0.044</b> | <b>0.008</b> |     |
| Decode – Replication                               | -         | 1.00        | 0.023           | 0.691(1979)         | 0.671(142627)        | 0.095        | 0.042        |     |
| <b>PGC_SCZ wave3 (incl. wave2 and replication)</b> | <b>15</b> | <b>1.00</b> | <b>8.01e-09</b> | <b>0.707(76755)</b> | <b>0.683(243650)</b> | <b>0.045</b> | <b>0.008</b> |     |

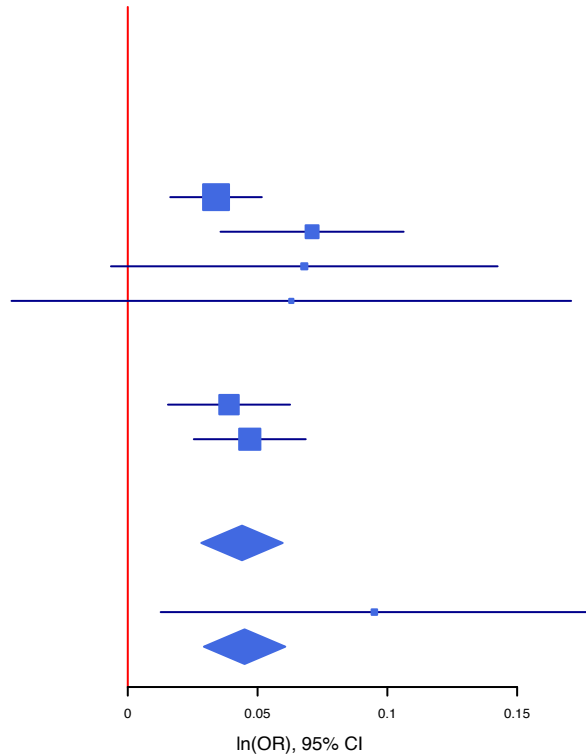

rs61924144

A/C  
---  
het\_P: 0.451 het\_I: 0.0

12:72258821

|                                                    | ngt      | info        | p_value         | f_ca(n)             | f_co(n)              | ln(OR)        | STDerr       |
|----------------------------------------------------|----------|-------------|-----------------|---------------------|----------------------|---------------|--------------|
| PGC_SCZ wave3 eur only                             | 0        | 0.99        | 1.86e-09        | 0.898(53386)        | 0.906(77258)         | -0.087        | 0.014        |
| PGC_SCZ wave3 asn only                             | 1        | 0.93        | 0.456           | 0.965(14004)        | 0.968(16757)         | -0.039        | 0.052        |
| PGC_SCZ afram only                                 | -        | 0.99        | 0.683           | -(6152)             | 0.902(3918)          | -0.02         | 0.049        |
| PGC_SCZ latino only                                | -        | 1.01        | 0.626           | -(1234)             | 0.946(3090)          | -0.052        | 0.107        |
| PGC_SCZ wave2 only                                 | 0        | 1.00        | 0.000108        | 0.902(34850)        | 0.906(44347)         | -0.071        | 0.018        |
| PGC_SCZ wave3 (excl. wave2)                        | 1        | 0.97        | 7.58e-06        | 0.923(39926)        | 0.926(56676)         | -0.087        | 0.019        |
| <b>PGC_SCZ wave3 (incl. wave2)</b>                 | <b>1</b> | <b>0.98</b> | <b>4.15e-09</b> | <b>0.915(74776)</b> | <b>0.918(101023)</b> | <b>-0.079</b> | <b>0.013</b> |
| Decode – Replication                               | -        | 1.00        | 0.82            | 0.912(1979)         | 0.925(142627)        | -0.013        | 0.057        |
| <b>PGC_SCZ wave3 (incl. wave2 and replication)</b> | <b>1</b> | <b>0.99</b> | <b>8.27e-09</b> | <b>0.915(76755)</b> | <b>0.922(243650)</b> | <b>-0.075</b> | <b>0.013</b> |

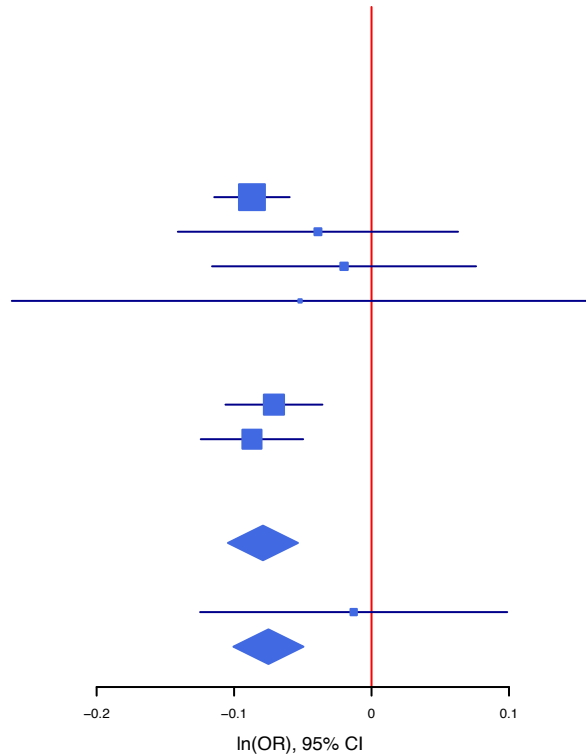

| rs229362                                           | G/A      |             | 21:22116499     |                     | het_P:               | 0.588        | het_I:       | 0.0 |
|----------------------------------------------------|----------|-------------|-----------------|---------------------|----------------------|--------------|--------------|-----|
|                                                    | ngt      | info        | p_value         | f_ca(n)             |                      |              |              |     |
| PGC_SCZ wave3 eur only                             | 0        | 0.99        | 1.31e-06        | 0.213(53386)        | 0.208(77258)         | 0.051        | 0.011        |     |
| PGC_SCZ wave3 asn only                             | 0        | 0.95        | 0.00137         | 0.088(14004)        | 0.081(16757)         | 0.1          | 0.031        |     |
| PGC_SCZ afram only                                 | -        | 0.95        | 0.497           | -(6152)             | 0.281(3918)          | 0.023        | 0.033        |     |
| PGC_SCZ latino only                                | -        | 0.98        | 0.745           | -(1234)             | 0.113(3090)          | 0.025        | 0.078        |     |
| PGC_SCZ wave2 only                                 | 0        | 0.99        | 0.0002          | 0.208(34850)        | 0.209(44347)         | 0.05         | 0.013        |     |
| PGC_SCZ wave3 (excl. wave2)                        | 0        | 0.97        | 3.24e-05        | 0.177(39926)        | 0.174(56676)         | 0.056        | 0.014        |     |
| <b>PGC_SCZ wave3 (incl. wave2)</b>                 | <b>0</b> | <b>0.98</b> | <b>2.32e-08</b> | <b>0.189(74776)</b> | <b>0.187(101023)</b> | <b>0.053</b> | <b>0.01</b>  |     |
| Decode – Replication                               | -        | 1.00        | 0.16            | 0.194(1979)         | 0.182(142627)        | 0.061        | 0.043        |     |
| <b>PGC_SCZ wave3 (incl. wave2 and replication)</b> | <b>0</b> | <b>0.99</b> | <b>8.33e-09</b> | <b>0.189(76755)</b> | <b>0.184(243650)</b> | <b>0.054</b> | <b>0.009</b> |     |

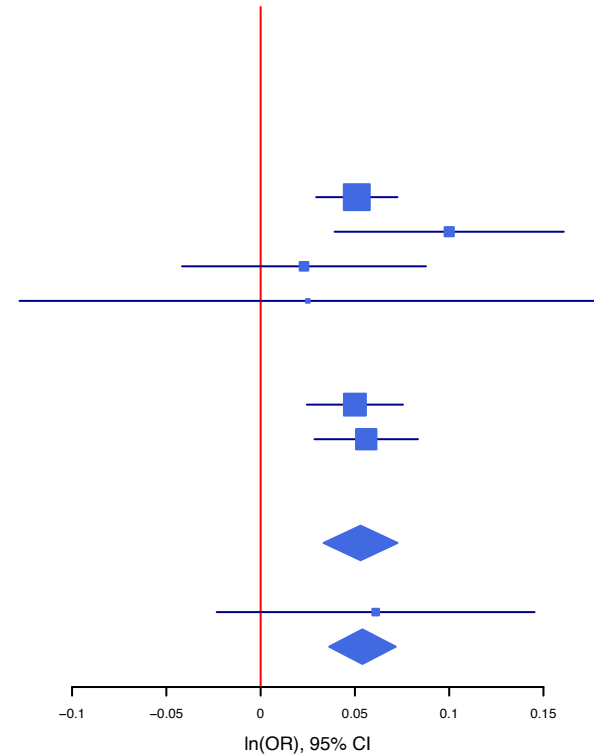

| rs329647                                           | G/C      |             | 11:133764666    |                     | het_P:               | 0.798        | het_I:       | 0.0 |
|----------------------------------------------------|----------|-------------|-----------------|---------------------|----------------------|--------------|--------------|-----|
|                                                    | ngt      | info        | p_value         | f_ca(n)             |                      |              |              |     |
| PGC_SCZ wave3 eur only                             | 0        | 0.99        | 1.32e-08        | 0.312(53386)        | 0.295(77258)         | 0.054        | 0.009        |     |
| PGC_SCZ wave3 asn only                             | 0        | 0.97        | 0.367           | 0.219(14004)        | 0.216(16757)         | 0.019        | 0.021        |     |
| PGC_SCZ afram only                                 | -        | 0.98        | 0.351           | -(6152)             | 0.551(3918)          | 0.028        | 0.03         |     |
| PGC_SCZ latino only                                | -        | 1.00        | 0.5             | -(1234)             | 0.299(3090)          | 0.036        | 0.054        |     |
| PGC_SCZ wave2 only                                 | 0        | 0.99        | 2.19e-06        | 0.301(34850)        | 0.286(44347)         | 0.057        | 0.012        |     |
| PGC_SCZ wave3 (excl. wave2)                        | 0        | 0.99        | 0.00102         | 0.34(39926)         | 0.321(56676)         | 0.037        | 0.011        |     |
| <b>PGC_SCZ wave3 (incl. wave2)</b>                 | <b>0</b> | <b>0.99</b> | <b>1.85e-08</b> | <b>0.325(74776)</b> | <b>0.308(101023)</b> | <b>0.046</b> | <b>0.008</b> |     |
| Decode – Replication                               | -        | 1.00        | 0.163           | 0.289(1979)         | 0.296(142627)        | 0.058        | 0.042        |     |
| <b>PGC_SCZ wave3 (incl. wave2 and replication)</b> | <b>0</b> | <b>0.99</b> | <b>8.33e-09</b> | <b>0.324(76755)</b> | <b>0.301(243650)</b> | <b>0.046</b> | <b>0.008</b> |     |

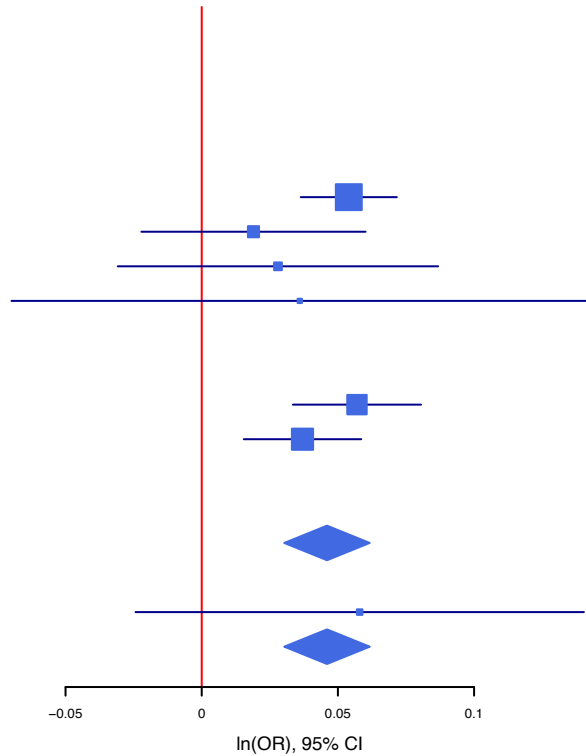

|                                                    | A/G      |             | 5:90272197      |                     | het_P:               | 0.873        | het_I:       | 0.0 |
|----------------------------------------------------|----------|-------------|-----------------|---------------------|----------------------|--------------|--------------|-----|
|                                                    | ngt      | info        | p_value         | f_ca(n)             |                      |              |              |     |
|                                                    |          |             |                 |                     |                      |              |              |     |
|                                                    |          |             |                 |                     |                      |              |              |     |
| PGC_SCZ wave3 eur only                             | 1        | 0.99        | 2.17e-08        | 0.698(53386)        | 0.685(77258)         | 0.052        | 0.009        |     |
| PGC_SCZ afram only                                 | -        | 0.97        | 0.107           | -(6152)             | 0.822(3918)          | 0.062        | 0.039        |     |
| PGC_SCZ latino only                                | -        | 1.00        | 0.215           | -(1234)             | 0.846(3090)          | 0.086        | 0.069        |     |
| PGC_SCZ wave2 only                                 | 1        | 1.00        | 4.41e-05        | 0.695(34850)        | 0.684(44347)         | 0.049        | 0.012        |     |
| PGC_SCZ wave3 (excl. wave2)                        | 0        | 0.94        | 9.32e-06        | 0.796(39926)        | 0.766(56676)         | 0.061        | 0.014        |     |
| <b>PGC_SCZ wave3 (incl. wave2)</b>                 | <b>1</b> | <b>0.96</b> | <b>1.77e-09</b> | <b>0.753(74776)</b> | <b>0.73(101023)</b>  | <b>0.054</b> | <b>0.009</b> |     |
| Decode – Replication                               | -        | 1.00        | 0.666           | 0.713(1979)         | 0.717(142627)        | -0.017       | 0.04         |     |
| <b>PGC_SCZ wave3 (incl. wave2 and replication)</b> | <b>1</b> | <b>0.98</b> | <b>8.45e-09</b> | <b>0.752(76755)</b> | <b>0.723(243650)</b> | <b>0.051</b> | <b>0.009</b> |     |

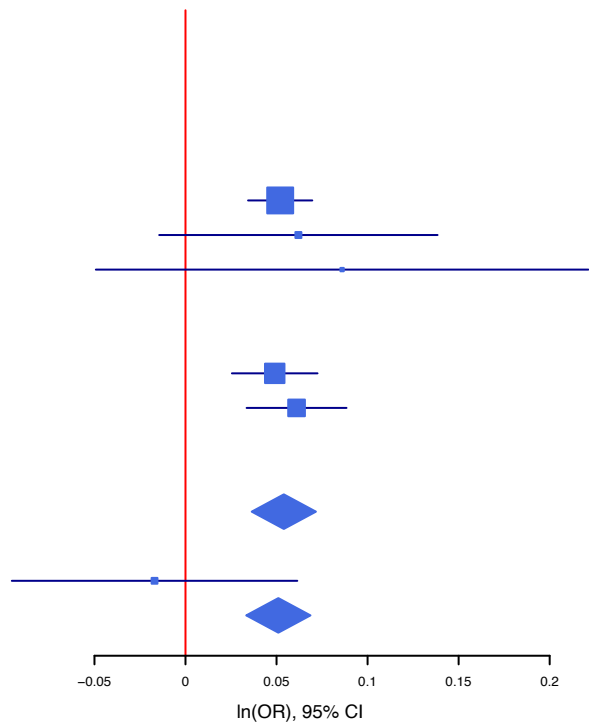

rs2349487 C/T 7:8565024  
 +++ het\_P: 0.418 het\_I: 0.0

|                                                    | ngt      | info        | p_value         | f_ca(n)             | f_co(n)              | ln(OR)        | STDerr       |
|----------------------------------------------------|----------|-------------|-----------------|---------------------|----------------------|---------------|--------------|
| PGC_SCZ wave3 eur only                             | 0        | 0.99        | 4.74e-07        | 0.677(53386)        | 0.686(77258)         | -0.047        | 0.009        |
| PGC_SCZ wave3 asn only                             | 0        | 0.97        | 0.11            | 0.614(14004)        | 0.621(16757)         | -0.028        | 0.018        |
| PGC_SCZ afram only                                 | -        | 0.98        | 0.00556         | -(6152)             | 0.622(3918)          | -0.084        | 0.03         |
| PGC_SCZ latino only                                | -        | 0.98        | 0.395           | -(1234)             | 0.684(3090)          | -0.046        | 0.054        |
| PGC_SCZ wave2 only                                 | 0        | 0.99        | 1.74e-05        | 0.67(34850)         | 0.682(44347)         | -0.05         | 0.012        |
| PGC_SCZ wave3 (excl. wave2)                        | 0        | 0.97        | 8.07e-05        | 0.656(39926)        | 0.663(56676)         | -0.042        | 0.011        |
| <b>PGC_SCZ wave3 (incl. wave2)</b>                 | <b>0</b> | <b>0.98</b> | <b>5.71e-09</b> | <b>0.661(74776)</b> | <b>0.67(101023)</b>  | <b>-0.046</b> | <b>0.008</b> |
| Decode – Replication                               | -        | 1.00        | 0.934           | 0.677(1979)         | 0.692(142627)        | -0.003        | 0.04         |
| <b>PGC_SCZ wave3 (incl. wave2 and replication)</b> | <b>0</b> | <b>0.99</b> | <b>8.57e-09</b> | <b>0.661(76755)</b> | <b>0.682(243650)</b> | <b>-0.044</b> | <b>0.008</b> |

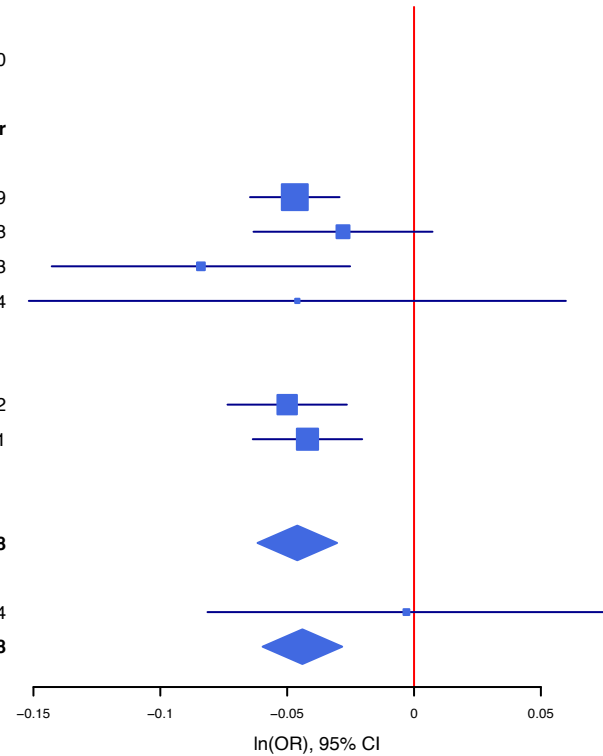

| rs76462269                                         | T/C      |             | 22:42680201     |                     | het_P:               | 0.772        | het_I:       | 0.0 |
|----------------------------------------------------|----------|-------------|-----------------|---------------------|----------------------|--------------|--------------|-----|
|                                                    | ++       | +-          | het_P:          | het_I:              |                      |              |              |     |
|                                                    | ngt      | info        | p_value         | f_ca(n)             | f_co(n)              | ln(OR)       | STDerr       |     |
| PGC_SCZ wave3 eur only                             | 1        | 0.96        | 7.88e-08        | 0.895(53386)        | 0.891(77258)         | 0.077        | 0.014        |     |
| PGC_SCZ wave3 asn only                             | 1        | 0.85        | 0.648           | 0.973(14004)        | 0.972(16757)         | 0.026        | 0.057        |     |
| PGC_SCZ afram only                                 | -        | 0.94        | 0.0401          | -(6152)             | 0.82(3918)           | 0.08         | 0.039        |     |
| PGC_SCZ latino only                                | -        | 0.96        | 0.988           | -(1234)             | 0.944(3090)          | -0.002       | 0.108        |     |
| PGC_SCZ wave2 only                                 | 0        | 0.96        | 3.85e-06        | 0.9(34850)          | 0.891(44347)         | 0.084        | 0.018        |     |
| PGC_SCZ wave3 (excl. wave2)                        | 2        | 0.93        | 0.000763        | 0.907(39926)        | 0.907(56676)         | 0.062        | 0.018        |     |
| <b>PGC_SCZ wave3 (incl. wave2)</b>                 | <b>2</b> | <b>0.94</b> | <b>1.43e-08</b> | <b>0.905(74776)</b> | <b>0.901(101023)</b> | <b>0.073</b> | <b>0.013</b> |     |
| Decode – Replication                               | -        | 1.00        | 0.336           | 0.907(1979)         | 0.919(142627)        | 0.08         | 0.082        |     |
| <b>PGC_SCZ wave3 (incl. wave2 and replication)</b> | <b>2</b> | <b>0.97</b> | <b>8.65e-09</b> | <b>0.905(76755)</b> | <b>0.911(243650)</b> | <b>0.073</b> | <b>0.013</b> |     |

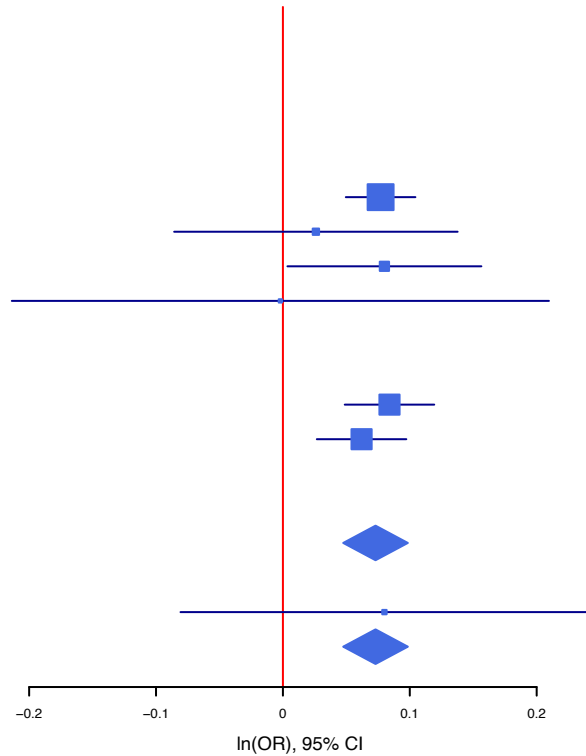



| rs12652777                                         | T/C      |             | 5:155775075    |                     |                      |              |              |
|----------------------------------------------------|----------|-------------|----------------|---------------------|----------------------|--------------|--------------|
|                                                    | +++      | het_P:      | 0.363          | het_I:              | 1.4                  |              |              |
|                                                    | ngt      | info        | p_value        | f_ca(n)             | f_co(n)              | ln(OR)       | STDerr       |
| PGC_SCZ wave3 eur only                             | 6        | 1.00        | 1.52e-08       | 0.489(53386)        | 0.478(77258)         | 0.049        | 0.009        |
| PGC_SCZ wave3 asn only                             | 0        | 0.98        | 0.191          | 0.231(14004)        | 0.226(16757)         | 0.027        | 0.02         |
| PGC_SCZ afram only                                 | -        | 0.97        | 0.814          | -(6152)             | 0.708(3918)          | 0.008        | 0.033        |
| PGC_SCZ latino only                                | -        | 0.99        | 0.0783         | -(1234)             | 0.506(3090)          | 0.088        | 0.05         |
| PGC_SCZ wave2 only                                 | 0        | 0.99        | 1.86e-06       | 0.481(34850)        | 0.478(44347)         | 0.052        | 0.011        |
| PGC_SCZ wave3 (excl. wave2)                        | 6        | 0.99        | 0.000511       | 0.474(39926)        | 0.458(56676)         | 0.037        | 0.011        |
| <b>PGC_SCZ wave3 (incl. wave2)</b>                 | <b>6</b> | <b>0.99</b> | <b>5.1e-09</b> | <b>0.477(74776)</b> | <b>0.465(101023)</b> | <b>0.044</b> | <b>0.008</b> |
| Decode – Replication                               | -        | 1.00        | 0.882          | 0.455(1979)         | 0.461(142627)        | 0.006        | 0.037        |
| <b>PGC_SCZ wave3 (incl. wave2 and replication)</b> | <b>6</b> | <b>1.00</b> | <b>8.7e-09</b> | <b>0.477(76755)</b> | <b>0.463(243650)</b> | <b>0.043</b> | <b>0.007</b> |

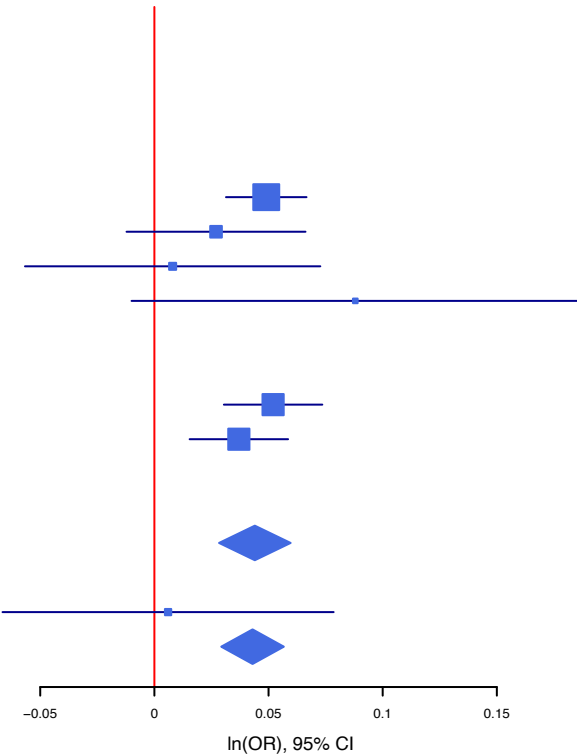

| rs7604885                                          | G/A      |             | 2:162806408     |                     | het_P:               | 0.549         | het_I:       | 0.0 |
|----------------------------------------------------|----------|-------------|-----------------|---------------------|----------------------|---------------|--------------|-----|
|                                                    | ngt      | info        | p_value         | f_ca(n)             |                      |               |              |     |
| PGC_SCZ wave3 eur only                             | 1        | 0.99        | 2.48e-08        | 0.55(53386)         | 0.564(77258)         | -0.048        | 0.009        |     |
| PGC_SCZ wave3 asn only                             | 3        | 0.89        | 0.683           | 0.88(14004)         | 0.882(16757)         | -0.011        | 0.028        |     |
| PGC_SCZ afram only                                 | -        | 0.99        | 0.0211          | -(6152)             | 0.73(3918)           | -0.077        | 0.033        |     |
| PGC_SCZ latino only                                | -        | 0.96        | 0.748           | -(1234)             | 0.524(3090)          | -0.016        | 0.051        |     |
| PGC_SCZ wave2 only                                 | 2        | 1.00        | 1.7e-06         | 0.568(34850)        | 0.575(44347)         | -0.053        | 0.011        |     |
| PGC_SCZ wave3 (excl. wave2)                        | 2        | 0.96        | 0.000628        | 0.655(39926)        | 0.651(56676)         | -0.039        | 0.012        |     |
| <b>PGC_SCZ wave3 (incl. wave2)</b>                 | <b>4</b> | <b>0.97</b> | <b>5.94e-09</b> | <b>0.62(74776)</b>  | <b>0.622(101023)</b> | <b>-0.046</b> | <b>0.008</b> |     |
| Decode – Replication                               | -        | 1.00        | 0.67            | 0.586(1979)         | 0.585(142627)        | -0.016        | 0.038        |     |
| <b>PGC_SCZ wave3 (incl. wave2 and replication)</b> | <b>4</b> | <b>0.99</b> | <b>8.92e-09</b> | <b>0.619(76755)</b> | <b>0.601(243650)</b> | <b>-0.045</b> | <b>0.008</b> |     |

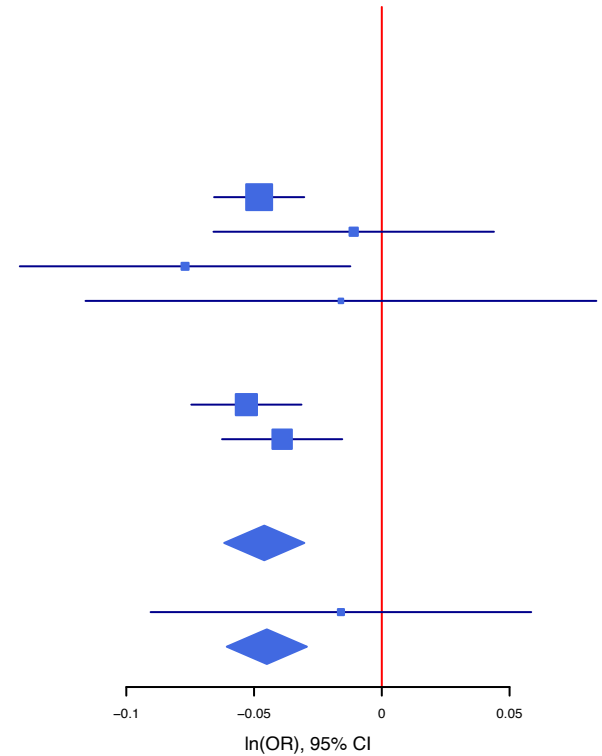

| rs740076                                           | A/G       |             | 5:137788607     |                     | het_P:               | 0.823         | het_I:       | 0.0 |
|----------------------------------------------------|-----------|-------------|-----------------|---------------------|----------------------|---------------|--------------|-----|
|                                                    | ---       |             |                 |                     |                      |               |              |     |
|                                                    | ngt       | info        | p_value         | f_ca(n)             | f_co(n)              | ln(OR)        | STDerr       |     |
| PGC_SCZ wave3 eur only                             | 53        | 1.00        | 5.71e-06        | 0.551(53386)        | 0.561(77258)         | -0.039        | 0.009        |     |
| PGC_SCZ wave3 asn only                             | 6         | 0.93        | 0.00141         | 0.766(14004)        | 0.782(16757)         | -0.067        | 0.021        |     |
| PGC_SCZ afram only                                 | -         | 0.99        | 0.303           | -(6152)             | 0.648(3918)          | -0.032        | 0.031        |     |
| PGC_SCZ latino only                                | -         | 0.99        | 0.731           | -(1234)             | 0.484(3090)          | -0.017        | 0.05         |     |
| PGC_SCZ wave2 only                                 | 16        | 0.99        | 6.42e-05        | 0.56(34850)         | 0.564(44347)         | -0.044        | 0.011        |     |
| PGC_SCZ wave3 (excl. wave2)                        | 43        | 0.98        | 0.000168        | 0.607(39926)        | 0.613(56676)         | -0.04         | 0.011        |     |
| <b>PGC_SCZ wave3 (incl. wave2)</b>                 | <b>59</b> | <b>0.99</b> | <b>4.13e-08</b> | <b>0.589(74776)</b> | <b>0.595(101023)</b> | <b>-0.042</b> | <b>0.008</b> |     |
| Decode – Replication                               | -         | 1.00        | 0.0981          | 0.57(1979)          | 0.577(142627)        | -0.063        | 0.038        |     |
| <b>PGC_SCZ wave3 (incl. wave2 and replication)</b> | <b>59</b> | <b>0.99</b> | <b>9.28e-09</b> | <b>0.589(76755)</b> | <b>0.585(243650)</b> | <b>-0.043</b> | <b>0.008</b> |     |

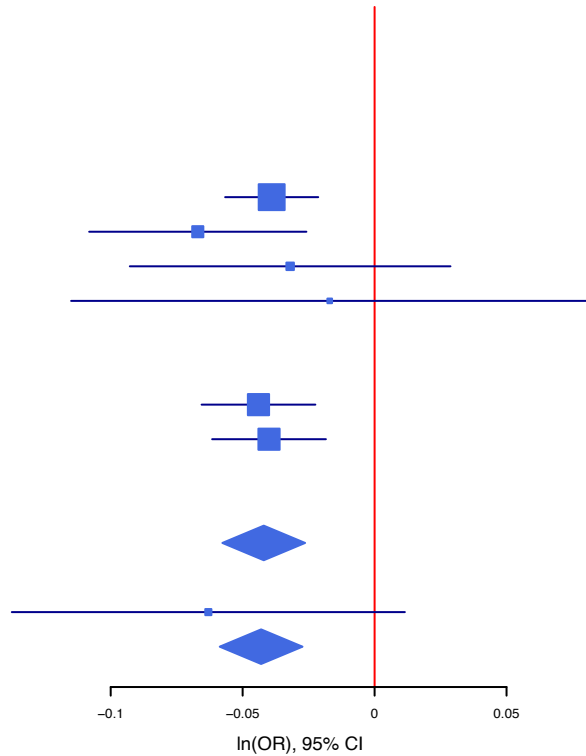

| rs12885251                                         | G/A      |             | 14:99670791     |                     | het_P:               | 0.725        | het_I:       | 0.0 |
|----------------------------------------------------|----------|-------------|-----------------|---------------------|----------------------|--------------|--------------|-----|
|                                                    | ngt      | info        | p_value         | f_ca(n)             |                      |              |              |     |
| PGC_SCZ wave3 eur only                             | 6        | 0.99        | 1.3e-07         | 0.562(53386)        | 0.547(77258)         | 0.046        | 0.009        |     |
| PGC_SCZ wave3 asn only                             | 0        | 0.90        | 0.945           | 0.923(14004)        | 0.929(16757)         | 0.002        | 0.036        |     |
| PGC_SCZ afram only                                 | -        | 0.96        | 0.125           | -(6152)             | 0.846(3918)          | 0.064        | 0.042        |     |
| PGC_SCZ latino only                                | -        | 0.97        | 0.874           | -(1234)             | 0.691(3090)          | 0.009        | 0.055        |     |
| PGC_SCZ wave2 only                                 | 0        | 0.99        | 1.95e-05        | 0.583(34850)        | 0.558(44347)         | 0.048        | 0.011        |     |
| PGC_SCZ wave3 (excl. wave2)                        | 6        | 0.96        | 0.00137         | 0.724(39926)        | 0.696(56676)         | 0.039        | 0.012        |     |
| <b>PGC_SCZ wave3 (incl. wave2)</b>                 | <b>6</b> | <b>0.97</b> | <b>1.19e-07</b> | <b>0.669(74776)</b> | <b>0.643(101023)</b> | <b>0.044</b> | <b>0.008</b> |     |
| Decode – Replication                               | -        | 1.00        | 0.00991         | 0.551(1979)         | 0.54(142627)         | 0.099        | 0.038        |     |
| <b>PGC_SCZ wave3 (incl. wave2 and replication)</b> | <b>6</b> | <b>0.99</b> | <b>9.56e-09</b> | <b>0.666(76755)</b> | <b>0.586(243650)</b> | <b>0.046</b> | <b>0.008</b> |     |

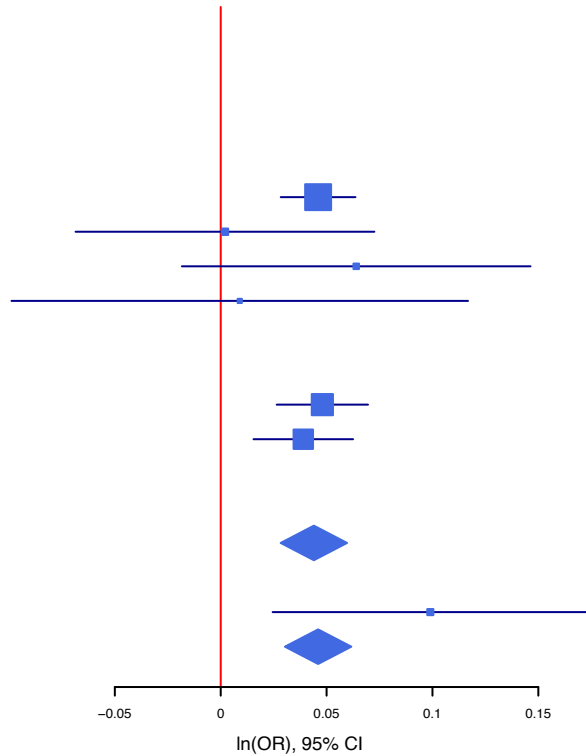

|                                                    | G/A      |             | 13:102022648    |                     | het_P:               | 0.95          | het_I:      | 0.0 |
|----------------------------------------------------|----------|-------------|-----------------|---------------------|----------------------|---------------|-------------|-----|
|                                                    | ngt      | info        | p_value         | f_ca(n)             |                      |               |             |     |
| PGC_SCZ wave3 eur only                             | 1        | 1.00        | 8.43e-08        | 0.758(53386)        | 0.769(77258)         | -0.054        | 0.01        |     |
| PGC_SCZ afram only                                 | -        | 0.99        | 0.0955          | -(6152)             | 0.842(3918)          | -0.067        | 0.04        |     |
| PGC_SCZ latino only                                | -        | 1.01        | 0.439           | -(1234)             | 0.865(3090)          | -0.055        | 0.071       |     |
| PGC_SCZ wave2 only                                 | 1        | 1.00        | 0.000949        | 0.759(34850)        | 0.769(44347)         | -0.043        | 0.013       |     |
| PGC_SCZ wave3 (excl. wave2)                        | 0        | 0.99        | 1.5e-06         | 0.816(39926)        | 0.81(56676)          | -0.07         | 0.014       |     |
| <b>PGC_SCZ wave3 (incl. wave2)</b>                 | <b>1</b> | <b>0.99</b> | <b>1.57e-08</b> | <b>0.789(74776)</b> | <b>0.79(101023)</b>  | <b>-0.055</b> | <b>0.01</b> |     |
| Decode – Replication                               | -        | 1.00        | 0.357           | 0.763(1979)         | 0.766(142627)        | -0.041        | 0.044       |     |
| <b>PGC_SCZ wave3 (incl. wave2 and replication)</b> | <b>1</b> | <b>1.00</b> | <b>1.03e-08</b> | <b>0.788(76755)</b> | <b>0.777(243650)</b> | <b>-0.054</b> | <b>0.01</b> |     |

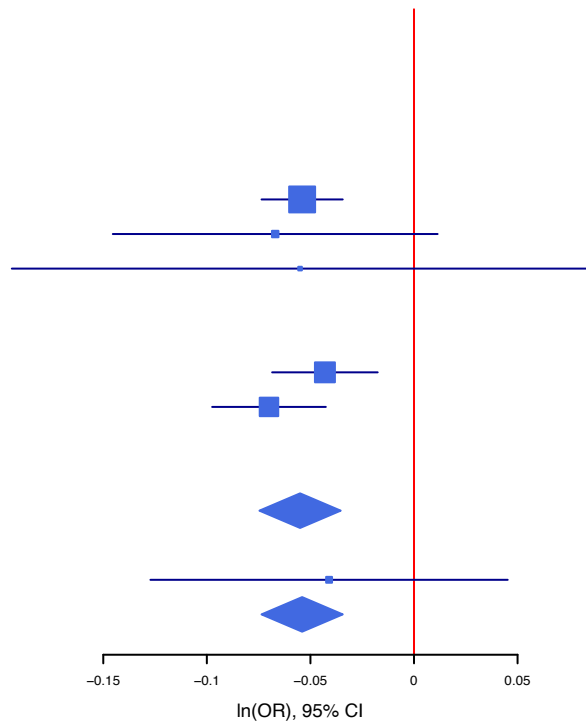

| rs7575796                                          | A/G       |             | 2:97746526      |                     | het_P:               | 0.626        | het_I:       | 0.0 |
|----------------------------------------------------|-----------|-------------|-----------------|---------------------|----------------------|--------------|--------------|-----|
|                                                    | +++       |             |                 |                     |                      |              |              |     |
|                                                    | ngt       | info        | p_value         | f_ca(n)             | f_co(n)              | ln(OR)       | STDerr       |     |
| PGC_SCZ wave3 eur only                             | 23        | 0.80        | 2.06e-08        | 0.917(53386)        | 0.906(77258)         | 0.096        | 0.017        |     |
| PGC_SCZ afram only                                 | -         | 0.73        | 0.112           | -(6152)             | 0.988(3918)          | 0.247        | 0.155        |     |
| PGC_SCZ latino only                                | -         | 0.65        | 0.546           | -(1234)             | 0.975(3090)          | 0.117        | 0.195        |     |
| PGC_SCZ wave2 only                                 | 0         | 0.75        | 1.05e-05        | 0.916(34850)        | 0.903(44347)         | 0.097        | 0.022        |     |
| PGC_SCZ wave3 (excl. wave2)                        | 23        | 0.70        | 0.000137        | 0.958(39926)        | 0.945(56676)         | 0.102        | 0.027        |     |
| <b>PGC_SCZ wave3 (incl. wave2)</b>                 | <b>23</b> | <b>0.72</b> | <b>5.31e-09</b> | <b>0.939(74776)</b> | <b>0.927(101023)</b> | <b>0.099</b> | <b>0.017</b> |     |
| Decode – Replication                               | -         | 1.00        | 0.842           | 0.923(1979)         | 0.925(142627)        | 0.014        | 0.068        |     |
| <b>PGC_SCZ wave3 (incl. wave2 and replication)</b> | <b>23</b> | <b>0.87</b> | <b>1.05e-08</b> | <b>0.939(76755)</b> | <b>0.926(243650)</b> | <b>0.094</b> | <b>0.016</b> |     |

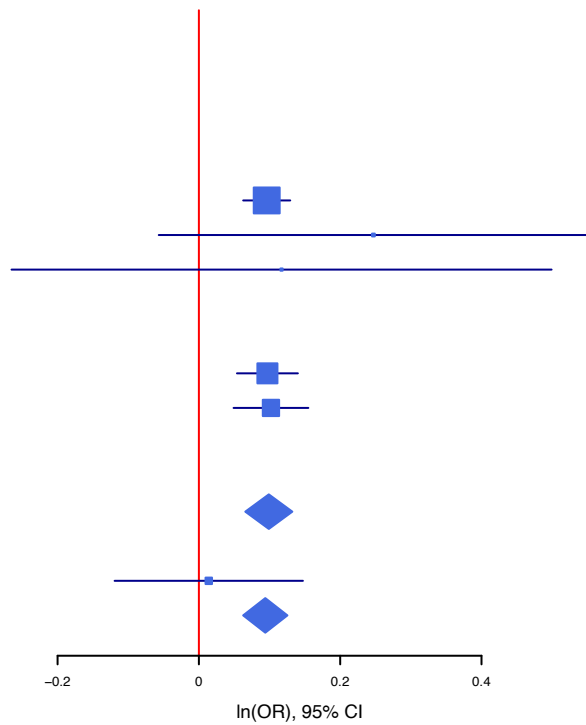

| rs10559                                            | A/G       |             | 1:153920564     |                     |                      |               |              |
|----------------------------------------------------|-----------|-------------|-----------------|---------------------|----------------------|---------------|--------------|
|                                                    | --+       |             | het_P:          | 0.66                | het_I:               | 0.0           |              |
|                                                    | ngt       | info        | p_value         | f_ca(n)             | f_co(n)              | ln(OR)        | STDerr       |
| PGC_SCZ wave3 eur only                             | 16        | 1.00        | 3.69e-06        | 0.677(53386)        | 0.687(77258)         | -0.043        | 0.009        |
| PGC_SCZ wave3 asn only                             | 4         | 0.99        | 0.00252         | 0.723(14004)        | 0.735(16757)         | -0.058        | 0.019        |
| PGC_SCZ afram only                                 | -         | 1.01        | 0.377           | -(6152)             | 0.858(3918)          | -0.037        | 0.042        |
| PGC_SCZ latino only                                | -         | 1.00        | 0.994           | -(1234)             | 0.575(3090)          | 0.0           | 0.051        |
| PGC_SCZ wave2 only                                 | 14        | 1.00        | 0.0029          | 0.678(34850)        | 0.685(44347)         | -0.035        | 0.012        |
| PGC_SCZ wave3 (excl. wave2)                        | 6         | 0.99        | 2.2e-06         | 0.704(39926)        | 0.708(56676)         | -0.053        | 0.011        |
| <b>PGC_SCZ wave3 (incl. wave2)</b>                 | <b>20</b> | <b>1.00</b> | <b>4.02e-08</b> | <b>0.694(74776)</b> | <b>0.7(101023)</b>   | <b>-0.044</b> | <b>0.008</b> |
| Decode – Replication                               | -         | 1.00        | 0.107           | 0.667(1979)         | 0.709(142627)        | -0.065        | 0.04         |
| <b>PGC_SCZ wave3 (incl. wave2 and replication)</b> | <b>20</b> | <b>1.00</b> | <b>1.06e-08</b> | <b>0.693(76755)</b> | <b>0.705(243650)</b> | <b>-0.045</b> | <b>0.008</b> |

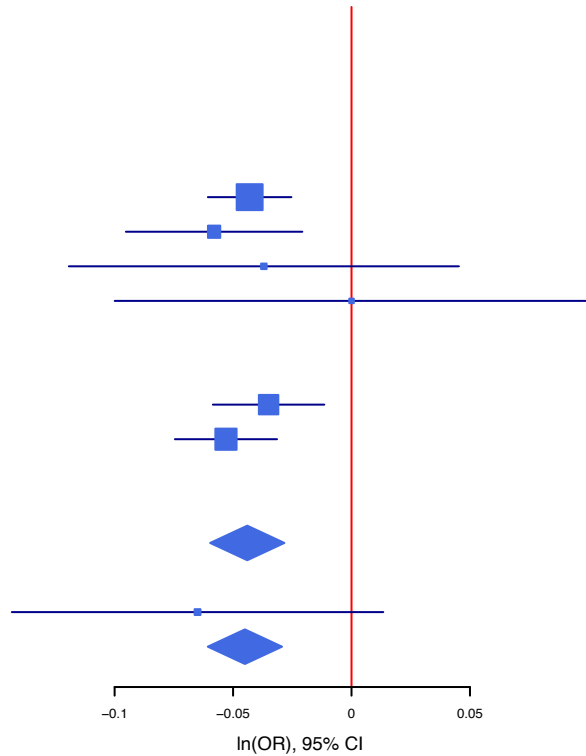

| rs11263770                                         | G/A      |             | 17:34896877     |                     | het_P:               | 0.188        | het_I:       | 40.2 |
|----------------------------------------------------|----------|-------------|-----------------|---------------------|----------------------|--------------|--------------|------|
|                                                    | ngt      | info        | p_value         | f_ca(n)             |                      |              |              |      |
| PGC_SCZ wave3 eur only                             | 0        | 0.99        | 4.83e-06        | 0.543(53386)        | 0.53(77258)          | 0.039        | 0.009        |      |
| PGC_SCZ wave3 asn only                             | 0        | 0.82        | 0.076           | 0.646(14004)        | 0.642(16757)         | 0.034        | 0.019        |      |
| PGC_SCZ afram only                                 | -        | 0.97        | 0.00217         | -(6152)             | 0.637(3918)          | 0.094        | 0.031        |      |
| PGC_SCZ latino only                                | -        | 1.02        | 0.177           | -(1234)             | 0.45(3090)           | 0.067        | 0.05         |      |
| PGC_SCZ wave2 only                                 | 0        | 0.99        | 0.00036         | 0.546(34850)        | 0.533(44347)         | 0.039        | 0.011        |      |
| PGC_SCZ wave3 (excl. wave2)                        | 0        | 0.95        | 1.08e-05        | 0.568(39926)        | 0.559(56676)         | 0.046        | 0.01         |      |
| <b>PGC_SCZ wave3 (incl. wave2)</b>                 | <b>0</b> | <b>0.97</b> | <b>1.74e-08</b> | <b>0.559(74776)</b> | <b>0.549(101023)</b> | <b>0.043</b> | <b>0.008</b> |      |
| Decode – Replication                               | -        | 1.00        | 0.264           | 0.547(1979)         | 0.548(142627)        | 0.042        | 0.038        |      |
| <b>PGC_SCZ wave3 (incl. wave2 and replication)</b> | <b>0</b> | <b>0.99</b> | <b>1.09e-08</b> | <b>0.559(76755)</b> | <b>0.548(243650)</b> | <b>0.043</b> | <b>0.007</b> |      |

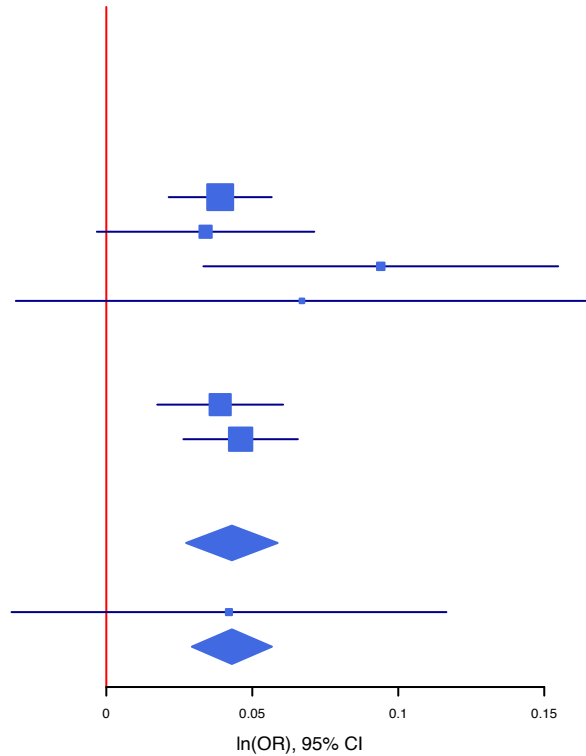



| rs7599488                                          | C/T      |             | 2:60718347      |                     | het_P:               | 0.778        | het_I:       | 0.0 |
|----------------------------------------------------|----------|-------------|-----------------|---------------------|----------------------|--------------|--------------|-----|
|                                                    | ngt      | info        | p_value         | f_ca(n)             |                      |              |              |     |
| PGC_SCZ wave3 eur only                             | 8        | 0.99        | 1.12e-06        | 0.578(53386)        | 0.568(77258)         | 0.043        | 0.009        |     |
| PGC_SCZ wave3 asn only                             | 1        | 0.95        | 0.143           | 0.258(14004)        | 0.247(16757)         | 0.03         | 0.02         |     |
| PGC_SCZ afram only                                 | -        | 1.01        | 0.102           | -(6152)             | 0.68(3918)           | 0.051        | 0.031        |     |
| PGC_SCZ latino only                                | -        | 1.00        | 0.855           | -(1234)             | 0.479(3090)          | 0.009        | 0.05         |     |
| PGC_SCZ wave2 only                                 | 1        | 0.99        | 3.02e-08        | 0.56(34850)         | 0.558(44347)         | 0.061        | 0.011        |     |
| PGC_SCZ wave3 (excl. wave2)                        | 8        | 0.98        | 0.0495          | 0.507(39926)        | 0.502(56676)         | 0.021        | 0.011        |     |
| <b>PGC_SCZ wave3 (incl. wave2)</b>                 | <b>9</b> | <b>0.99</b> | <b>1.32e-07</b> | <b>0.528(74776)</b> | <b>0.524(101023)</b> | <b>0.04</b>  | <b>0.008</b> |     |
| Decode – Replication                               | -        | 1.00        | 0.00412         | 0.576(1979)         | 0.582(142627)        | 0.108        | 0.038        |     |
| <b>PGC_SCZ wave3 (incl. wave2 and replication)</b> | <b>9</b> | <b>0.99</b> | <b>1.1e-08</b>  | <b>0.529(76755)</b> | <b>0.556(243650)</b> | <b>0.043</b> | <b>0.008</b> |     |

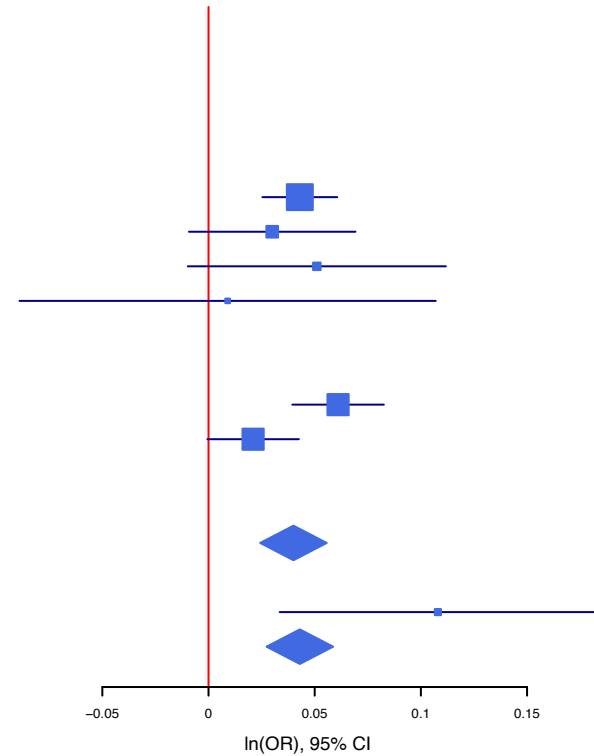

rs79445414

T/C  
-?-  
8:33863561  
het\_P: 0.513 het\_I: 0.0

|                                                    | ngt      | info        | p_value         | f_ca(n)            | f_co(n)              | ln(OR)        | STDerr       |
|----------------------------------------------------|----------|-------------|-----------------|--------------------|----------------------|---------------|--------------|
| PGC_SCZ wave3 eur only                             | 6        | 0.93        | 2.8e-08         | 0.956(53386)       | 0.96(77258)          | -0.123        | 0.022        |
| PGC_SCZ latino only                                | -        | 0.94        | 0.204           | -(1234)            | 0.985(3090)          | -0.256        | 0.202        |
| PGC_SCZ wave2 only                                 | 1        | 0.94        | 3.56e-07        | 0.956(34850)       | 0.96(44347)          | -0.145        | 0.028        |
| PGC_SCZ wave3 (excl. wave2)                        | 5        | 0.93        | 0.00638         | 0.967(39926)       | 0.966(56676)         | -0.095        | 0.035        |
| <b>PGC_SCZ wave3 (incl. wave2)</b>                 | <b>6</b> | <b>0.93</b> | <b>1.44e-08</b> | <b>0.96(74776)</b> | <b>0.963(101023)</b> | <b>-0.125</b> | <b>0.022</b> |
| Decode - Replication                               | -        | 1.00        | 0.354           | 0.962(1979)        | 0.949(142627)        | -0.08         | 0.087        |
| <b>PGC_SCZ wave3 (incl. wave2 and replication)</b> | <b>6</b> | <b>0.97</b> | <b>1.1e-08</b>  | <b>0.96(76755)</b> | <b>0.955(243650)</b> | <b>-0.122</b> | <b>0.021</b> |

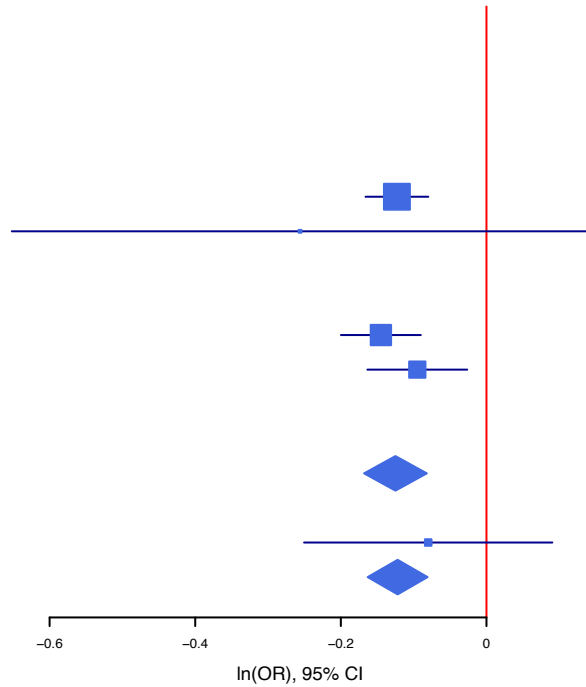

|                                                    | T/C      |             | 22:51103091     |                     | het_P:               | 0.442         | het_I:       | 0.0 |
|----------------------------------------------------|----------|-------------|-----------------|---------------------|----------------------|---------------|--------------|-----|
|                                                    | ngt      | info        | p_value         | f_ca(n)             |                      |               |              |     |
| PGC_SCZ wave3 eur only                             | 0        | 0.98        | 7.45e-09        | 0.297(53386)        | 0.302(77258)         | -0.055        | 0.01         |     |
| PGC_SCZ wave3 asn only                             | 0        | 0.85        | 0.295           | 0.411(14004)        | 0.42(16757)          | -0.02         | 0.019        |     |
| PGC_SCZ afram only                                 | -        | 0.94        | 0.687           | -(6152)             | 0.442(3918)          | -0.012        | 0.03         |     |
| PGC_SCZ latino only                                | -        | 0.93        | 0.168           | -(1234)             | 0.26(3090)           | -0.082        | 0.059        |     |
| PGC_SCZ wave2 only                                 | 0        | 0.98        | 0.000275        | 0.297(34850)        | 0.297(44347)         | -0.044        | 0.012        |     |
| PGC_SCZ wave3 (excl. wave2)                        | 0        | 0.94        | 1.35e-05        | 0.348(39926)        | 0.348(56676)         | -0.048        | 0.011        |     |
| <b>PGC_SCZ wave3 (incl. wave2)</b>                 | <b>0</b> | <b>0.95</b> | <b>1.6e-08</b>  | <b>0.328(74776)</b> | <b>0.328(101023)</b> | <b>-0.046</b> | <b>0.008</b> |     |
| Decode – Replication                               | -        | 1.00        | 0.399           | 0.305(1979)         | 0.291(142627)        | -0.036        | 0.042        |     |
| <b>PGC_SCZ wave3 (incl. wave2 and replication)</b> | <b>0</b> | <b>0.98</b> | <b>1.12e-08</b> | <b>0.327(76755)</b> | <b>0.307(243650)</b> | <b>-0.045</b> | <b>0.008</b> |     |

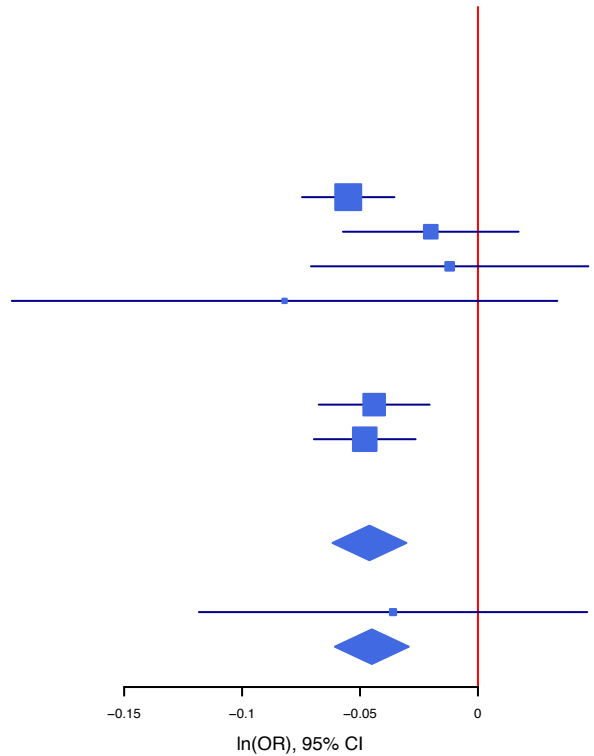

**rs2914025**                      **T/G**                      **5:90987296**  
 -??                                      het\_P:                      1.0    het\_I:                      0.0

**ngt**    **info**    **p\_value**                      **f\_ca(n)**                      **f\_co(n)**    **ln(OR)**    **STDerr**

PGC\_SCZ wave3 eur only                      0    1.00    1.14e-08    0.776(53386)                      0.789(77258)                      -0.059                      0.01

PGC\_SCZ wave3 asn only                      0    0.98    0.0332    0.635(14004)                      0.644(16757)                      -0.038                      0.018

PGC\_SCZ wave2 only                      0    1.00    6.17e-06    0.772(34850)                      0.789(44347)                      -0.059                      0.013

PGC\_SCZ wave3 (excl. wave2)                      0    0.99    6.57e-05    0.719(39926)                      0.74(56676)                      -0.049                      0.012

**PGC\_SCZ wave3 (incl. wave2)**                      **0**    **0.99**    **1.97e-09**    **0.746(74776)**                      **0.763(101023)**                      **-0.054**                      **0.009**

Decode - Replication                      -    1.00    0.342    0.78(1979)                      0.773(142627)                      0.044                      0.047

**PGC\_SCZ wave3 (incl. wave2 and replication)**                      **0**    **1.00**    **1.12e-08**    **0.747(76755)**                      **0.769(243650)**                      **-0.051**                      **0.009**

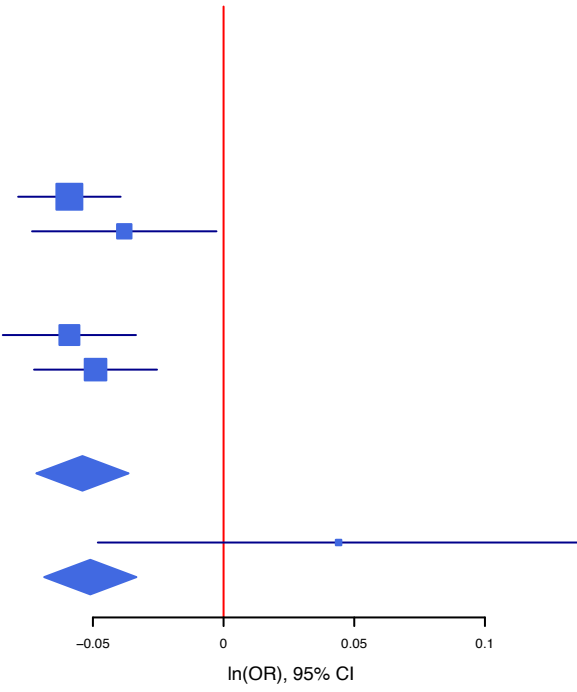

rs9390083 C/G 6:143647665  
 --+ het\_P: 0.679 het\_I: 0.0

|                                                    | ngt       | info        | p_value         | f_ca(n)             | f_co(n)              | ln(OR)        | STDerr      |
|----------------------------------------------------|-----------|-------------|-----------------|---------------------|----------------------|---------------|-------------|
| PGC_SCZ wave3 eur only                             | 12        | 0.98        | 4.26e-06        | 0.827(53386)        | 0.835(77258)         | -0.053        | 0.012       |
| PGC_SCZ wave3 asn only                             | 3         | 0.94        | 0.00139         | 0.816(14004)        | 0.826(16757)         | -0.073        | 0.023       |
| PGC_SCZ afram only                                 | -         | 0.99        | 0.431           | -(6152)             | 0.926(3918)          | -0.044        | 0.056       |
| PGC_SCZ latino only                                | -         | 0.98        | 0.93            | -(1234)             | 0.866(3090)          | 0.006         | 0.074       |
| PGC_SCZ wave2 only                                 | 12        | 0.99        | 7.85e-05        | 0.825(34850)        | 0.833(44347)         | -0.057        | 0.014       |
| PGC_SCZ wave3 (excl. wave2)                        | 3         | 0.97        | 0.000106        | 0.853(39926)        | 0.852(56676)         | -0.054        | 0.014       |
| <b>PGC_SCZ wave3 (incl. wave2)</b>                 | <b>15</b> | <b>0.98</b> | <b>3.03e-08</b> | <b>0.842(74776)</b> | <b>0.845(101023)</b> | <b>-0.056</b> | <b>0.01</b> |
| Decode – Replication                               | -         | 1.00        | 0.2             | 0.84(1979)          | 0.843(142627)        | -0.063        | 0.049       |
| <b>PGC_SCZ wave3 (incl. wave2 and replication)</b> | <b>15</b> | <b>0.99</b> | <b>1.17e-08</b> | <b>0.842(76755)</b> | <b>0.844(243650)</b> | <b>-0.056</b> | <b>0.01</b> |

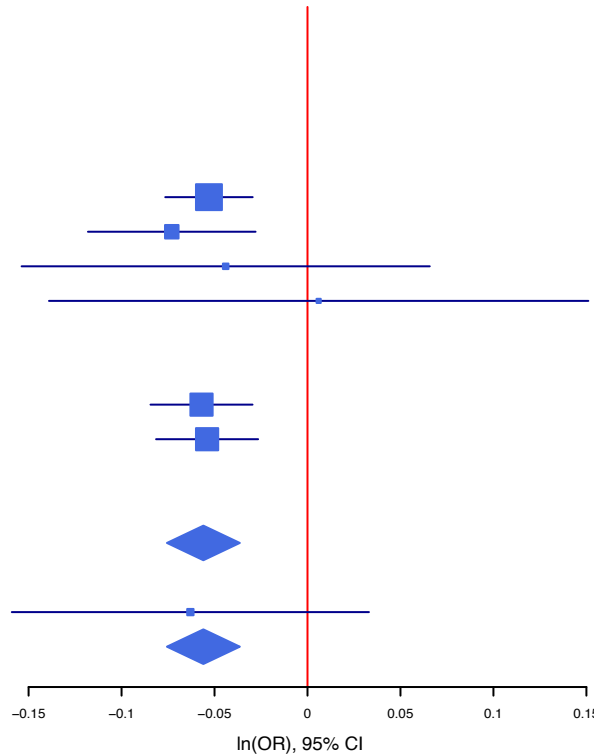

rs6479494                      A/G                      9:96330499  
 ---+                      het\_P:                      0.328    het\_I:                      10.4

|                                                    | ngt       | info        | p_value         | f_ca(n)             | f_co(n)              | ln(OR)        | STDerr      |
|----------------------------------------------------|-----------|-------------|-----------------|---------------------|----------------------|---------------|-------------|
| PGC_SCZ wave3 eur only                             | 30        | 0.99        | 2.48e-06        | 0.857(53386)        | 0.862(77258)         | -0.059        | 0.012       |
| PGC_SCZ wave3 asn only                             | 5         | 0.98        | 0.032           | 0.831(14004)        | 0.837(16757)         | -0.049        | 0.023       |
| PGC_SCZ afram only                                 | -         | 1.00        | 0.00336         | -(6152)             | 0.553(3918)          | -0.087        | 0.03        |
| PGC_SCZ latino only                                | -         | 0.99        | 0.802           | -(1234)             | 0.832(3090)          | 0.017         | 0.067       |
| PGC_SCZ wave2 only                                 | 23        | 0.99        | 0.000257        | 0.854(34850)        | 0.861(44347)         | -0.057        | 0.016       |
| PGC_SCZ wave3 (excl. wave2)                        | 12        | 0.99        | 8.75e-06        | 0.786(39926)        | 0.806(56676)         | -0.06         | 0.013       |
| <b>PGC_SCZ wave3 (incl. wave2)</b>                 | <b>35</b> | <b>0.99</b> | <b>9.57e-09</b> | <b>0.813(74776)</b> | <b>0.827(101023)</b> | <b>-0.058</b> | <b>0.01</b> |
| Decode – Replication                               | -         | 1.00        | 0.733           | 0.881(1979)         | 0.874(142627)        | -0.019        | 0.056       |
| <b>PGC_SCZ wave3 (incl. wave2 and replication)</b> | <b>35</b> | <b>0.99</b> | <b>1.18e-08</b> | <b>0.814(76755)</b> | <b>0.853(243650)</b> | <b>-0.057</b> | <b>0.01</b> |

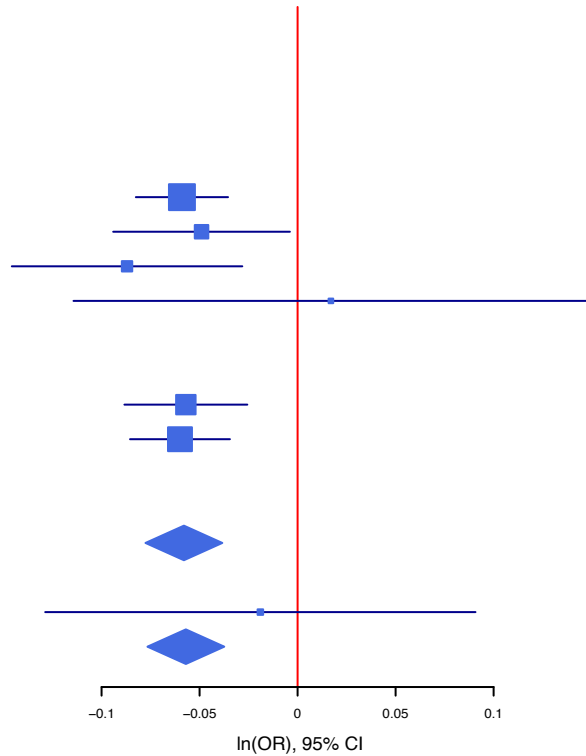

| rs34181670                                         | T/C      |             | 2:28019856      |                     | het_P:               | 0.628        | het_I:       | 0.0 |
|----------------------------------------------------|----------|-------------|-----------------|---------------------|----------------------|--------------|--------------|-----|
|                                                    | ngt      | info        | p_value         | f_ca(n)             |                      |              |              |     |
| PGC_SCZ wave3 eur only                             | 0        | 0.99        | 3.82e-06        | 0.79(53386)         | 0.779(77258)         | 0.049        | 0.01         |     |
| PGC_SCZ wave3 asn only                             | 0        | 0.97        | 0.00072         | 0.429(14004)        | 0.411(16757)         | 0.06         | 0.018        |     |
| PGC_SCZ afram only                                 | -        | 1.01        | 0.436           | -(6152)             | 0.645(3918)          | 0.024        | 0.03         |     |
| PGC_SCZ latino only                                | -        | 1.01        | 0.575           | -(1234)             | 0.535(3090)          | 0.029        | 0.051        |     |
| PGC_SCZ wave2 only                                 | 0        | 0.99        | 5.24e-06        | 0.767(34850)        | 0.767(44347)         | 0.06         | 0.013        |     |
| PGC_SCZ wave3 (excl. wave2)                        | 0        | 0.99        | 0.000319        | 0.631(39926)        | 0.642(56676)         | 0.04         | 0.011        |     |
| <b>PGC_SCZ wave3 (incl. wave2)</b>                 | <b>0</b> | <b>0.99</b> | <b>1.13e-08</b> | <b>0.685(74776)</b> | <b>0.69(101023)</b>  | <b>0.049</b> | <b>0.008</b> |     |
| Decode – Replication                               | -        | 1.00        | 0.686           | 0.785(1979)         | 0.768(142627)        | 0.019        | 0.046        |     |
| <b>PGC_SCZ wave3 (incl. wave2 and replication)</b> | <b>0</b> | <b>1.00</b> | <b>1.22e-08</b> | <b>0.687(76755)</b> | <b>0.733(243650)</b> | <b>0.048</b> | <b>0.008</b> |     |

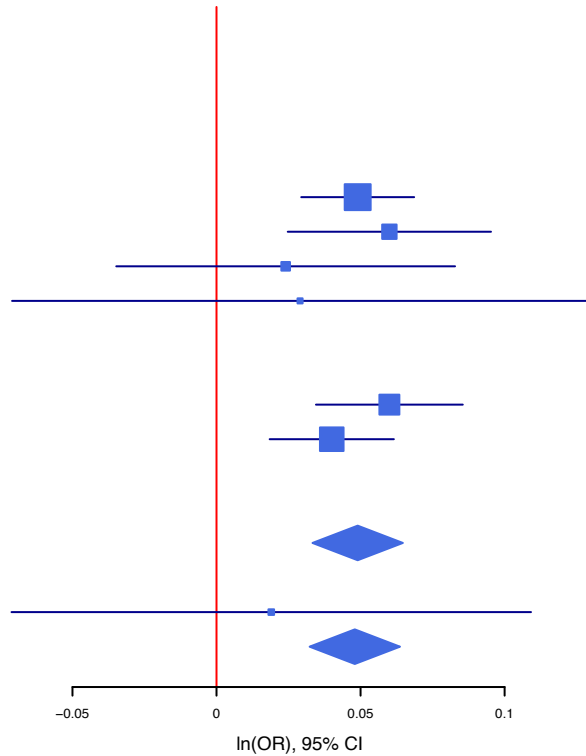

|                                                    | G/A      |             | 11:28387459     |                     | het_P:               | 0.449        | het_I:       | 0.0 |
|----------------------------------------------------|----------|-------------|-----------------|---------------------|----------------------|--------------|--------------|-----|
|                                                    | ngt      | info        | p_value         | f_ca(n)             |                      |              |              |     |
| PGC_SCZ wave3 eur only                             | 0        | 0.98        | 1.38e-06        | 0.515(53386)        | 0.506(77258)         | 0.042        | 0.009        |     |
| PGC_SCZ wave3 asn only                             | 0        | 0.96        | 0.00134         | 0.288(14004)        | 0.273(16757)         | 0.062        | 0.019        |     |
| PGC_SCZ afram only                                 | -        | 0.95        | 0.749           | -(6152)             | 0.264(3918)          | 0.011        | 0.034        |     |
| PGC_SCZ latino only                                | -        | 0.96        | 0.983           | -(1234)             | 0.606(3090)          | 0.001        | 0.052        |     |
| PGC_SCZ wave2 only                                 | 0        | 0.98        | 0.000534        | 0.503(34850)        | 0.501(44347)         | 0.038        | 0.011        |     |
| PGC_SCZ wave3 (excl. wave2)                        | 0        | 0.97        | 9.81e-06        | 0.432(39926)        | 0.432(56676)         | 0.047        | 0.011        |     |
| <b>PGC_SCZ wave3 (incl. wave2)</b>                 | <b>0</b> | <b>0.97</b> | <b>2.28e-08</b> | <b>0.46(74776)</b>  | <b>0.459(101023)</b> | <b>0.043</b> | <b>0.008</b> |     |
| Decode – Replication                               | -        | 1.00        | 0.308           | 0.502(1979)         | 0.509(142627)        | 0.039        | 0.038        |     |
| <b>PGC_SCZ wave3 (incl. wave2 and replication)</b> | <b>0</b> | <b>0.99</b> | <b>1.22e-08</b> | <b>0.461(76755)</b> | <b>0.487(243650)</b> | <b>0.043</b> | <b>0.008</b> |     |

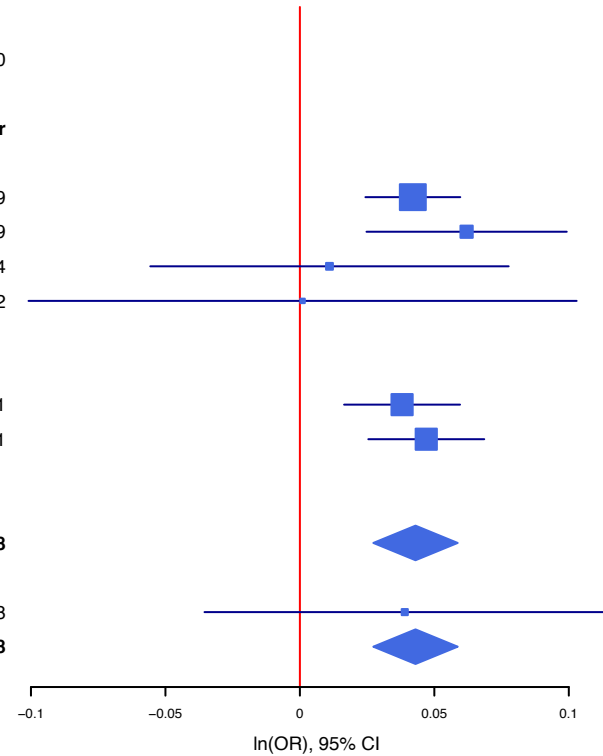



| rs9603649                                          | G/A      |             | 13:40506082     |                     | het_P:               | 0.471        | het_I:       | 0.0 |
|----------------------------------------------------|----------|-------------|-----------------|---------------------|----------------------|--------------|--------------|-----|
|                                                    | ---      |             |                 |                     |                      |              |              |     |
|                                                    | ngt      | info        | p_value         | f_ca(n)             | f_co(n)              | ln(OR)       | STDerr       |     |
| PGC_SCZ wave3 eur only                             | 1        | 0.99        | 1.06e-06        | 0.56(53386)         | 0.549(77258)         | 0.043        | 0.009        |     |
| PGC_SCZ wave3 asn only                             | 2        | 0.94        | 0.0561          | 0.705(14004)        | 0.696(16757)         | 0.037        | 0.019        |     |
| PGC_SCZ afram only                                 | -        | 0.94        | 0.0225          | -(6152)             | 0.775(3918)          | 0.082        | 0.036        |     |
| PGC_SCZ latino only                                | -        | 0.99        | 0.16            | -(1234)             | 0.459(3090)          | 0.071        | 0.051        |     |
| PGC_SCZ wave2 only                                 | 1        | 0.99        | 0.000169        | 0.562(34850)        | 0.547(44347)         | 0.041        | 0.011        |     |
| PGC_SCZ wave3 (excl. wave2)                        | 2        | 0.97        | 1.28e-05        | 0.619(39926)        | 0.606(56676)         | 0.047        | 0.011        |     |
| <b>PGC_SCZ wave3 (incl. wave2)</b>                 | <b>3</b> | <b>0.98</b> | <b>7.47e-09</b> | <b>0.596(74776)</b> | <b>0.584(101023)</b> | <b>0.044</b> | <b>0.008</b> |     |
| Decode – Replication                               | -        | 1.00        | 0.945           | 0.558(1979)         | 0.57(142627)         | 0.002        | 0.037        |     |
| <b>PGC_SCZ wave3 (incl. wave2 and replication)</b> | <b>3</b> | <b>0.99</b> | <b>1.23e-08</b> | <b>0.595(76755)</b> | <b>0.576(243650)</b> | <b>0.042</b> | <b>0.007</b> |     |

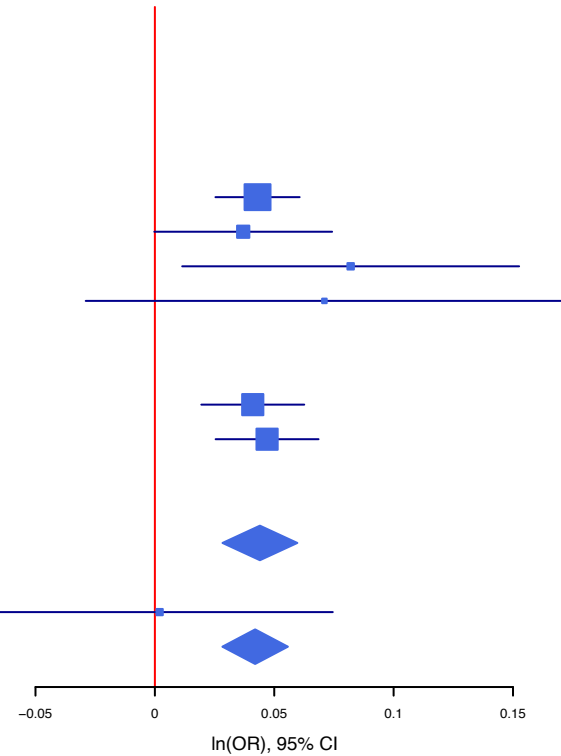

| rs12476312                                         | C/T      |             | 2:228983498     |                     | het_P:               | 0.612        | het_I:       | 0.0 |
|----------------------------------------------------|----------|-------------|-----------------|---------------------|----------------------|--------------|--------------|-----|
|                                                    | ngt      | info        | p_value         | f_ca(n)             |                      |              |              |     |
| PGC_SCZ wave3 eur only                             | 0        | 1.00        | 3.11e-06        | 0.661(53386)        | 0.654(77258)         | 0.042        | 0.009        |     |
| PGC_SCZ wave3 asn only                             | 0        | 0.98        | 0.0305          | 0.514(14004)        | 0.504(16757)         | 0.037        | 0.017        |     |
| PGC_SCZ afram only                                 | -        | 1.00        | 0.02            | -(6152)             | 0.684(3918)          | 0.073        | 0.031        |     |
| PGC_SCZ latino only                                | -        | 1.02        | 0.31            | -(1234)             | 0.503(3090)          | 0.05         | 0.049        |     |
| PGC_SCZ wave2 only                                 | 0        | 1.00        | 8.61e-06        | 0.66(34850)         | 0.654(44347)         | 0.051        | 0.011        |     |
| PGC_SCZ wave3 (excl. wave2)                        | 0        | 1.00        | 0.000345        | 0.597(39926)        | 0.6(56676)           | 0.037        | 0.01         |     |
| <b>PGC_SCZ wave3 (incl. wave2)</b>                 | <b>0</b> | <b>1.00</b> | <b>1.68e-08</b> | <b>0.622(74776)</b> | <b>0.621(101023)</b> | <b>0.043</b> | <b>0.008</b> |     |
| Decode – Replication                               | -        | 1.00        | 0.324           | 0.647(1979)         | 0.66(142627)         | 0.039        | 0.04         |     |
| <b>PGC_SCZ wave3 (incl. wave2 and replication)</b> | <b>0</b> | <b>1.00</b> | <b>1.23e-08</b> | <b>0.623(76755)</b> | <b>0.642(243650)</b> | <b>0.043</b> | <b>0.008</b> |     |

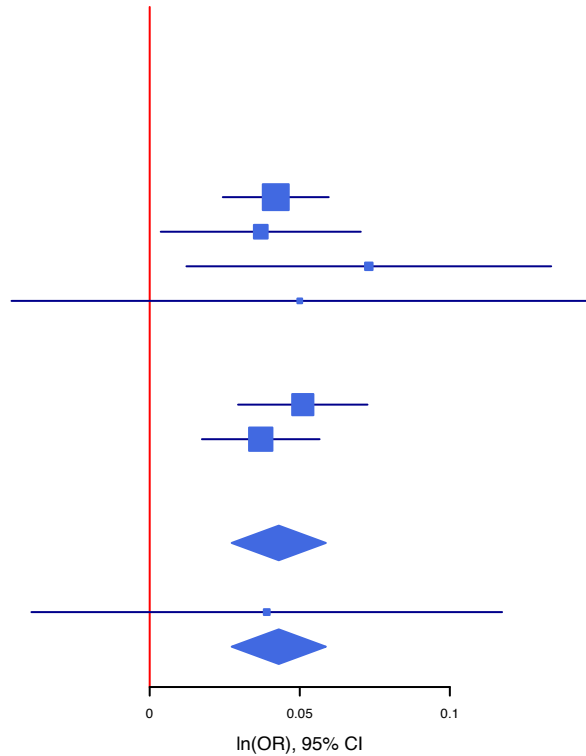

rs144821294

C/T  
+++                    19:2155136  
                          het\_P:            0.766    het\_I:    0.0

|                                                    | ngt      | info        | p_value         | f_ca(n)             | f_co(n)              | ln(OR)        | STDerr       |
|----------------------------------------------------|----------|-------------|-----------------|---------------------|----------------------|---------------|--------------|
| PGC_SCZ wave3 eur only                             | 0        | 0.78        | 1.22e-07        | 0.979(53386)        | 0.98(77258)          | -0.188        | 0.036        |
| PGC_SCZ wave3 asn only                             | 0        | 0.72        | 0.00427         | 0.898(14004)        | 0.904(16757)         | -0.095        | 0.033        |
| PGC_SCZ afram only                                 | -        | 0.61        | 0.371           | -(6152)             | 0.984(3918)          | -0.133        | 0.149        |
| PGC_SCZ latino only                                | -        | 0.84        | 0.757           | -(1234)             | 0.953(3090)          | -0.041        | 0.131        |
| PGC_SCZ wave2 only                                 | 0        | 0.77        | 2.31e-06        | 0.971(34850)        | 0.976(44347)         | -0.189        | 0.04         |
| PGC_SCZ wave3 (excl. wave2)                        | 0        | 0.75        | 0.000264        | 0.958(39926)        | 0.961(56676)         | -0.106        | 0.029        |
| <b>PGC_SCZ wave3 (incl. wave2)</b>                 | <b>0</b> | <b>0.76</b> | <b>9.8e-09</b>  | <b>0.963(74776)</b> | <b>0.966(101023)</b> | <b>-0.135</b> | <b>0.024</b> |
| Decode – Replication                               | -        | 0.99        | 0.791           | 0.976(1979)         | 0.976(142627)        | -0.035        | 0.133        |
| <b>PGC_SCZ wave3 (incl. wave2 and replication)</b> | <b>0</b> | <b>0.89</b> | <b>1.24e-08</b> | <b>0.963(76755)</b> | <b>0.972(243650)</b> | <b>-0.132</b> | <b>0.023</b> |

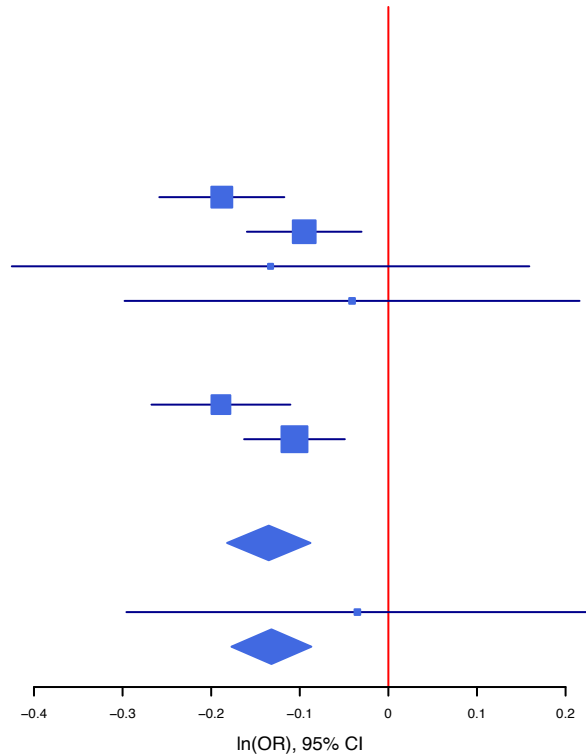

rs41314284

C/T  
+++      1:226790001  
het\_P:      0.446      het\_I:      0.0

|                                                    | ngt      | info        | p_value         | f_ca(n)             | f_co(n)              | ln(OR)        | STDerr       |
|----------------------------------------------------|----------|-------------|-----------------|---------------------|----------------------|---------------|--------------|
| PGC_SCZ wave3 eur only                             | 5        | 0.98        | 5.27e-08        | 0.902(53386)        | 0.911(77258)         | -0.081        | 0.015        |
| PGC_SCZ wave3 asn only                             | 0        | 0.89        | 0.909           | 0.983(14004)        | 0.984(16757)         | 0.008         | 0.07         |
| PGC_SCZ afram only                                 | -        | 0.93        | 0.802           | -(6152)             | 0.981(3918)          | 0.028         | 0.111        |
| PGC_SCZ latino only                                | -        | 0.98        | 0.106           | -(1234)             | 0.939(3090)          | -0.163        | 0.1          |
| PGC_SCZ wave2 only                                 | 0        | 0.98        | 4.27e-07        | 0.908(34850)        | 0.914(44347)         | -0.097        | 0.019        |
| PGC_SCZ wave3 (excl. wave2)                        | 5        | 0.95        | 0.0143          | 0.941(39926)        | 0.941(56676)         | -0.053        | 0.022        |
| <b>PGC_SCZ wave3 (incl. wave2)</b>                 | <b>5</b> | <b>0.96</b> | <b>6.39e-08</b> | <b>0.928(74776)</b> | <b>0.931(101023)</b> | <b>-0.077</b> | <b>0.014</b> |
| Decode – Replication                               | -        | 1.00        | 0.0659          | 0.911(1979)         | 0.9(142627)          | -0.125        | 0.068        |
| <b>PGC_SCZ wave3 (incl. wave2 and replication)</b> | <b>5</b> | <b>0.98</b> | <b>1.33e-08</b> | <b>0.928(76755)</b> | <b>0.914(243650)</b> | <b>-0.079</b> | <b>0.014</b> |

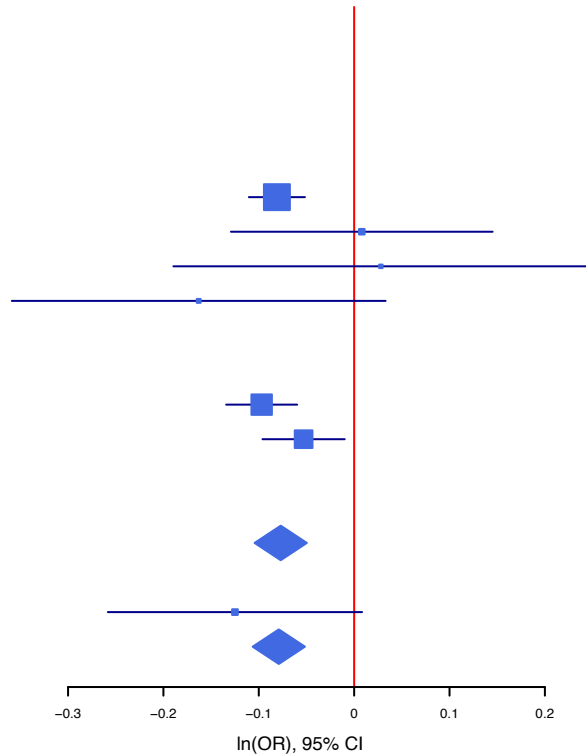

rs2033996                    T/A                    2:76284826  
 ++-                    het\_P:                    0.253    het\_I:                    27.2

|                                                    | ngt       | info        | p_value         | f_ca(n)             | f_co(n)              | ln(OR)        | STDerr       |
|----------------------------------------------------|-----------|-------------|-----------------|---------------------|----------------------|---------------|--------------|
| PGC_SCZ wave3 eur only                             | 18        | 1.00        | 1.22e-07        | 0.776(53386)        | 0.788(77258)         | -0.055        | 0.01         |
| PGC_SCZ wave3 asn only                             | 4         | 0.96        | 0.0618          | 0.96(14004)         | 0.965(16757)         | -0.086        | 0.046        |
| PGC_SCZ afram only                                 | -         | 1.00        | 0.316           | -(6152)             | 0.614(3918)          | -0.03         | 0.03         |
| PGC_SCZ latino only                                | -         | 0.99        | 0.503           | -(1234)             | 0.849(3090)          | 0.047         | 0.069        |
| PGC_SCZ wave2 only                                 | 18        | 1.00        | 2.11e-06        | 0.789(34850)        | 0.794(44347)         | -0.063        | 0.013        |
| PGC_SCZ wave3 (excl. wave2)                        | 4         | 0.99        | 0.00316         | 0.798(39926)        | 0.809(56676)         | -0.04         | 0.014        |
| <b>PGC_SCZ wave3 (incl. wave2)</b>                 | <b>22</b> | <b>0.99</b> | <b>4.33e-08</b> | <b>0.795(74776)</b> | <b>0.803(101023)</b> | <b>-0.052</b> | <b>0.01</b>  |
| Decode – Replication                               | -         | 1.00        | 0.112           | 0.774(1979)         | 0.772(142627)        | -0.073        | 0.046        |
| <b>PGC_SCZ wave3 (incl. wave2 and replication)</b> | <b>22</b> | <b>1.00</b> | <b>1.33e-08</b> | <b>0.795(76755)</b> | <b>0.786(243650)</b> | <b>-0.053</b> | <b>0.009</b> |

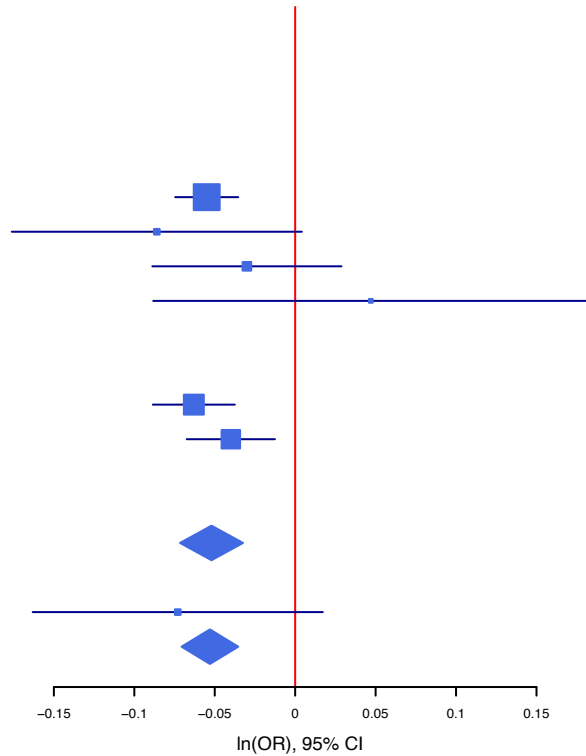

| rs10777187                                         | T/C      |             | 12:89940502     |                     | het_P:               | 0.882        | het_I:       | 0.0 |
|----------------------------------------------------|----------|-------------|-----------------|---------------------|----------------------|--------------|--------------|-----|
|                                                    | ngt      | info        | p_value         | f_ca(n)             |                      |              |              |     |
| PGC_SCZ wave3 eur only                             | 0        | 0.96        | 5.27e-07        | 0.254(53386)        | 0.248(77258)         | 0.051        | 0.01         |     |
| PGC_SCZ wave3 asn only                             | 0        | 0.91        | 0.0173          | 0.224(14004)        | 0.22(16757)          | 0.052        | 0.022        |     |
| PGC_SCZ afram only                                 | -        | 0.93        | 0.263           | -(6152)             | 0.235(3918)          | 0.04         | 0.036        |     |
| PGC_SCZ latino only                                | -        | 0.96        | 0.593           | -(1234)             | 0.375(3090)          | 0.028        | 0.053        |     |
| PGC_SCZ wave2 only                                 | 0        | 0.96        | 8.57e-06        | 0.251(34850)        | 0.244(44347)         | 0.057        | 0.013        |     |
| PGC_SCZ wave3 (excl. wave2)                        | 0        | 0.94        | 0.000325        | 0.268(39926)        | 0.262(56676)         | 0.043        | 0.012        |     |
| <b>PGC_SCZ wave3 (incl. wave2)</b>                 | <b>0</b> | <b>0.95</b> | <b>1.62e-08</b> | <b>0.262(74776)</b> | <b>0.255(101023)</b> | <b>0.05</b>  | <b>0.009</b> |     |
| Decode – Replication                               | -        | 1.00        | 0.471           | 0.238(1979)         | 0.25(142627)         | 0.032        | 0.045        |     |
| <b>PGC_SCZ wave3 (incl. wave2 and replication)</b> | <b>0</b> | <b>0.98</b> | <b>1.43e-08</b> | <b>0.261(76755)</b> | <b>0.252(243650)</b> | <b>0.049</b> | <b>0.009</b> |     |

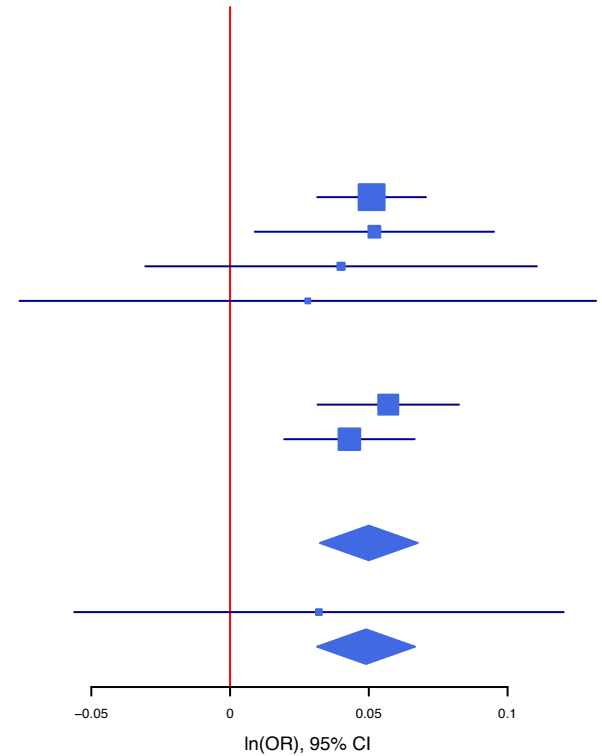

rs13142920

C/A

4:176728614

---

het\_P:

0.598

het\_I:

0.0

**ngt info p\_value f\_ca(n) f\_co(n) ln(OR) STDerr**

PGC\_SCZ wave3 eur only 28 0.98 0.000293 0.862(53386) 0.86(77258) 0.046 0.013  
PGC\_SCZ wave3 asn only 6 0.90 4.55e-05 0.689(14004) 0.669(16757) 0.078 0.019  
PGC\_SCZ afram only - 0.96 0.504 -(6152) 0.972(3918) 0.06 0.09  
PGC\_SCZ latino only - 0.98 0.0987 -(1234) 0.911(3090) 0.146 0.088

PGC\_SCZ wave2 only 25 0.99 0.000459 0.854(34850) 0.854(44347) 0.054 0.016  
PGC\_SCZ wave3 (excl. wave2) 9 0.95 2.69e-05 0.854(39926) 0.843(56676) 0.059 0.014

**PGC\_SCZ wave3 (incl. wave2) 34 0.97 5.16e-08 0.854(74776) 0.847(101023) 0.057 0.01**

Decode - Replication - 1.00 0.0738 0.831(1979) 0.857(142627) 0.092 0.052

**PGC\_SCZ wave3 (incl. wave2 and replication) 34 0.98 1.46e-08 0.854(76755) 0.853(243650) 0.058 0.01**

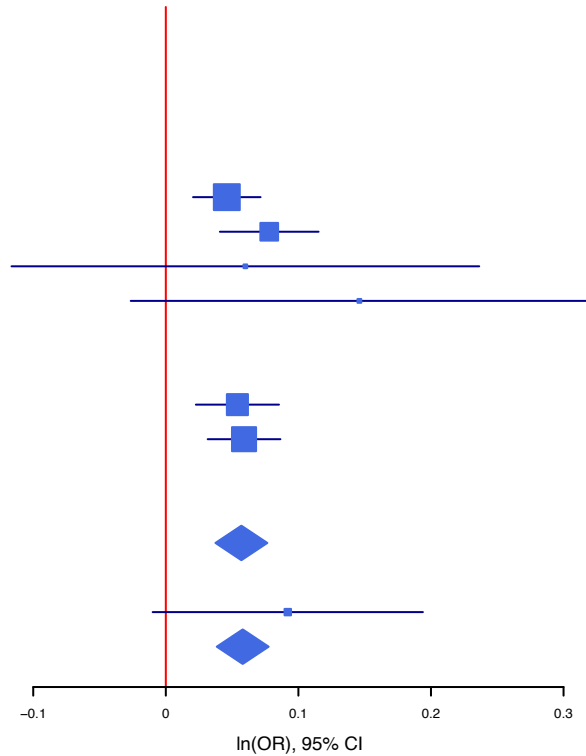

rs10861176

G/A 12:104631552  
++- het\_P: 0.222 het\_I: 33.5

|                                                    | ngt      | info        | p_value         | f_ca(n)             | f_co(n)              | ln(OR)        | STDerr       |
|----------------------------------------------------|----------|-------------|-----------------|---------------------|----------------------|---------------|--------------|
| PGC_SCZ wave3 eur only                             | 0        | 0.99        | 1.59e-08        | 0.257(53386)        | 0.263(77258)         | -0.056        | 0.01         |
| PGC_SCZ wave3 asn only                             | 0        | 0.99        | 0.0677          | 0.324(14004)        | 0.326(16757)         | -0.033        | 0.018        |
| PGC_SCZ afram only                                 | -        | 0.97        | 0.599           | -(6152)             | 0.455(3918)          | -0.016        | 0.03         |
| PGC_SCZ latino only                                | -        | 1.03        | 0.691           | -(1234)             | 0.391(3090)          | 0.02          | 0.05         |
| PGC_SCZ wave2 only                                 | 0        | 0.99        | 7.61e-05        | 0.259(34850)        | 0.262(44347)         | -0.049        | 0.012        |
| PGC_SCZ wave3 (excl. wave2)                        | 0        | 0.99        | 6.41e-05        | 0.339(39926)        | 0.327(56676)         | -0.044        | 0.011        |
| <b>PGC_SCZ wave3 (incl. wave2)</b>                 | <b>0</b> | <b>0.99</b> | <b>1.74e-08</b> | <b>0.308(74776)</b> | <b>0.302(101023)</b> | <b>-0.046</b> | <b>0.008</b> |
| Decode - Replication                               | -        | 1.00        | 0.414           | 0.261(1979)         | 0.253(142627)        | -0.036        | 0.044        |
| <b>PGC_SCZ wave3 (incl. wave2 and replication)</b> | <b>0</b> | <b>1.00</b> | <b>1.48e-08</b> | <b>0.307(76755)</b> | <b>0.275(243650)</b> | <b>-0.046</b> | <b>0.008</b> |

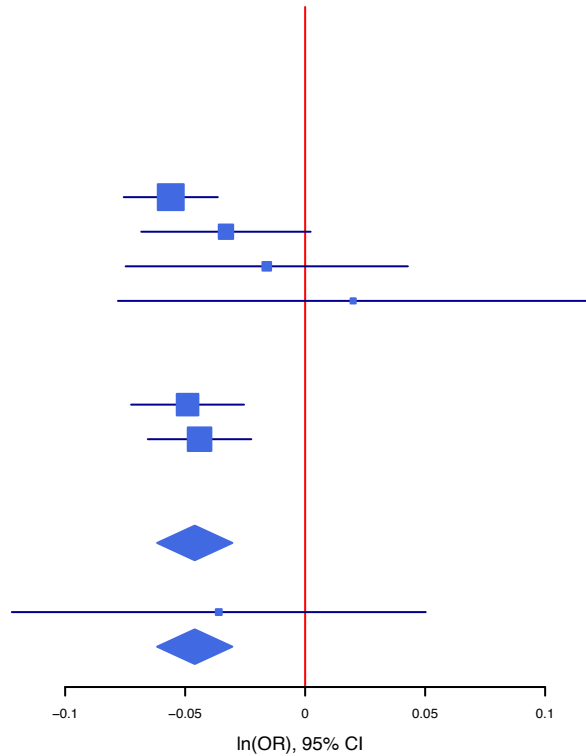



| rs7694724                                          | A/G       |             | 4:103962532     |                     |                      |               |              |
|----------------------------------------------------|-----------|-------------|-----------------|---------------------|----------------------|---------------|--------------|
|                                                    | --+       |             | het_P:          | 0.5                 | het_I:               | 0.0           |              |
|                                                    | ngt       | info        | p_value         | f_ca(n)             | f_co(n)              | ln(OR)        | STDerr       |
| PGC_SCZ wave3 eur only                             | 23        | 0.98        | 1.13e-05        | 0.49(53386)         | 0.5(77258)           | -0.038        | 0.009        |
| PGC_SCZ wave3 asn only                             | 4         | 0.92        | 0.00049         | 0.45(14004)         | 0.46(16757)          | -0.062        | 0.018        |
| PGC_SCZ afram only                                 | -         | 0.94        | 0.66            | -(6152)             | 0.241(3918)          | -0.016        | 0.035        |
| PGC_SCZ latino only                                | -         | 1.01        | 0.919           | -(1234)             | 0.377(3090)          | 0.005         | 0.051        |
| PGC_SCZ wave2 only                                 | 14        | 0.98        | 4.64e-06        | 0.488(34850)        | 0.501(44347)         | -0.05         | 0.011        |
| PGC_SCZ wave3 (excl. wave2)                        | 13        | 0.96        | 0.00234         | 0.409(39926)        | 0.433(56676)         | -0.032        | 0.01         |
| <b>PGC_SCZ wave3 (incl. wave2)</b>                 | <b>27</b> | <b>0.97</b> | <b>7.5e-08</b>  | <b>0.44(74776)</b>  | <b>0.459(101023)</b> | <b>-0.04</b>  | <b>0.008</b> |
| Decode – Replication                               | -         | 1.00        | 0.0614          | 0.504(1979)         | 0.498(142627)        | -0.071        | 0.038        |
| <b>PGC_SCZ wave3 (incl. wave2 and replication)</b> | <b>27</b> | <b>0.99</b> | <b>1.51e-08</b> | <b>0.441(76755)</b> | <b>0.481(243650)</b> | <b>-0.042</b> | <b>0.007</b> |

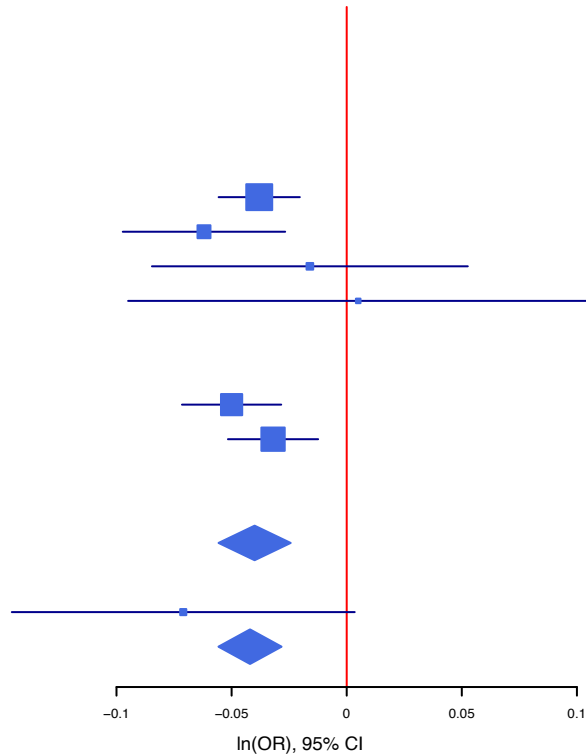

rs10243922

G/A 7:138599980  
+--+ het\_P: 0.043 het\_I: 68.1

|                                                    | ngt      | info        | p_value         | f_ca(n)             | f_co(n)              | ln(OR)        | STDerr       |
|----------------------------------------------------|----------|-------------|-----------------|---------------------|----------------------|---------------|--------------|
| PGC_SCZ wave3 eur only                             | 2        | 0.99        | 1.03e-07        | 0.682(53386)        | 0.691(77258)         | -0.05         | 0.009        |
| PGC_SCZ wave3 asn only                             | 1        | 0.95        | 0.0309          | 0.894(14004)        | 0.903(16757)         | -0.062        | 0.029        |
| PGC_SCZ afram only                                 | -        | 0.98        | 0.439           | -(6152)             | 0.516(3918)          | 0.023         | 0.03         |
| PGC_SCZ latino only                                | -        | 1.04        | 0.13            | -(1234)             | 0.806(3090)          | -0.092        | 0.061        |
| PGC_SCZ wave2 only                                 | 2        | 0.99        | 0.00212         | 0.696(34850)        | 0.696(44347)         | -0.036        | 0.012        |
| PGC_SCZ wave3 (excl. wave2)                        | 1        | 0.98        | 4.19e-06        | 0.72(39926)         | 0.729(56676)         | -0.055        | 0.012        |
| <b>PGC_SCZ wave3 (incl. wave2)</b>                 | <b>3</b> | <b>0.99</b> | <b>6.58e-08</b> | <b>0.71(74776)</b>  | <b>0.716(101023)</b> | <b>-0.046</b> | <b>0.008</b> |
| Decode – Replication                               | -        | 1.00        | 0.0943          | 0.67(1979)          | 0.674(142627)        | -0.068        | 0.041        |
| <b>PGC_SCZ wave3 (incl. wave2 and replication)</b> | <b>3</b> | <b>0.99</b> | <b>1.56e-08</b> | <b>0.709(76755)</b> | <b>0.693(243650)</b> | <b>-0.047</b> | <b>0.008</b> |

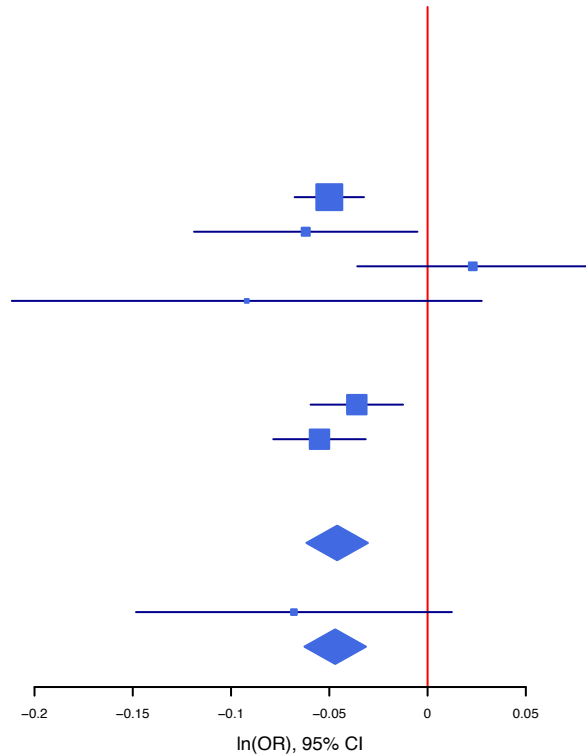

rs6546857                    **A/G**                    **2:73837955**  
 ---                                    het\_P:                    0.243    het\_I:    29.4

|                                                    | ngt      | info        | p_value         | f_ca(n)             | f_co(n)              | ln(OR)        | STDerr       |
|----------------------------------------------------|----------|-------------|-----------------|---------------------|----------------------|---------------|--------------|
| PGC_SCZ wave3 eur only                             | 6        | 0.99        | 2.74e-09        | 0.757(53386)        | 0.768(77258)         | -0.06         | 0.01         |
| PGC_SCZ afram only                                 | -        | 1.01        | 0.714           | -(6152)             | 0.459(3918)          | -0.011        | 0.029        |
| PGC_SCZ latino only                                | -        | 1.01        | 0.685           | -(1234)             | 0.765(3090)          | -0.023        | 0.058        |
| PGC_SCZ wave2 only                                 | 0        | 0.99        | 7.57e-07        | 0.757(34850)        | 0.769(44347)         | -0.065        | 0.013        |
| PGC_SCZ wave3 (excl. wave2)                        | 6        | 0.96        | 0.00186         | 0.718(39926)        | 0.732(56676)         | -0.043        | 0.014        |
| <b>PGC_SCZ wave3 (incl. wave2)</b>                 | <b>6</b> | <b>0.97</b> | <b>8.7e-09</b>  | <b>0.738(74776)</b> | <b>0.75(101023)</b>  | <b>-0.054</b> | <b>0.009</b> |
| Decode – Replication                               | -        | 1.00        | 0.947           | 0.779(1979)         | 0.776(142627)        | -0.003        | 0.043        |
| <b>PGC_SCZ wave3 (incl. wave2 and replication)</b> | <b>6</b> | <b>0.99</b> | <b>1.62e-08</b> | <b>0.739(76755)</b> | <b>0.765(243650)</b> | <b>-0.052</b> | <b>0.009</b> |

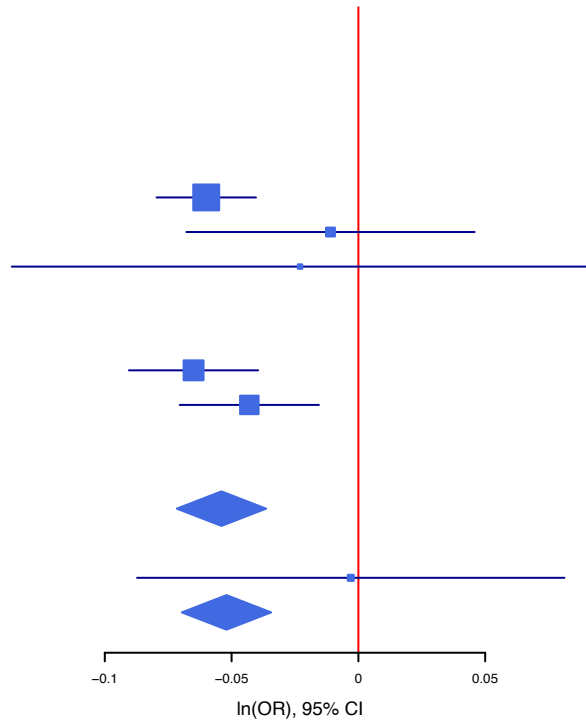

| rs1464492                                          | T/A      |             | 12:74540895     |                     |                      |              |              |
|----------------------------------------------------|----------|-------------|-----------------|---------------------|----------------------|--------------|--------------|
|                                                    | ---      |             | het_P:          | 0.292               | het_I:               | 18.9         |              |
|                                                    | ngt      | info        | p_value         | f_ca(n)             | f_co(n)              | ln(OR)       | STDerr       |
| PGC_SCZ wave3 eur only                             | 0        | 0.99        | 2.37e-06        | 0.531(53386)        | 0.518(77258)         | 0.041        | 0.009        |
| PGC_SCZ wave3 asn only                             | 0        | 0.99        | 0.0762          | 0.644(14004)        | 0.638(16757)         | 0.031        | 0.018        |
| PGC_SCZ afram only                                 | -        | 0.97        | 0.175           | -(6152)             | 0.165(3918)          | 0.056        | 0.041        |
| PGC_SCZ latino only                                | -        | 0.99        | 0.0207          | -(1234)             | 0.402(3090)          | 0.118        | 0.051        |
| PGC_SCZ wave2 only                                 | 0        | 1.00        | 2.54e-05        | 0.537(34850)        | 0.522(44347)         | 0.046        | 0.011        |
| PGC_SCZ wave3 (excl. wave2)                        | 0        | 0.99        | 0.000404        | 0.458(39926)        | 0.473(56676)         | 0.037        | 0.01         |
| <b>PGC_SCZ wave3 (incl. wave2)</b>                 | <b>0</b> | <b>0.99</b> | <b>4.99e-08</b> | <b>0.489(74776)</b> | <b>0.492(101023)</b> | <b>0.041</b> | <b>0.008</b> |
| Decode – Replication                               | -        | 1.00        | 0.103           | 0.541(1979)         | 0.528(142627)        | 0.062        | 0.038        |
| <b>PGC_SCZ wave3 (incl. wave2 and replication)</b> | <b>0</b> | <b>1.00</b> | <b>1.63e-08</b> | <b>0.49(76755)</b>  | <b>0.512(243650)</b> | <b>0.042</b> | <b>0.008</b> |

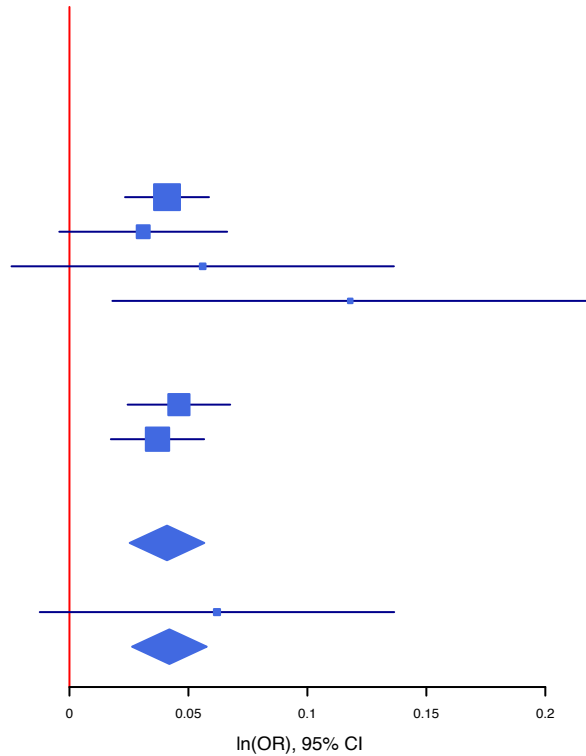

| rs80249955                                         | C/T      |             | 6:69279811      |                     |                      |               |              |
|----------------------------------------------------|----------|-------------|-----------------|---------------------|----------------------|---------------|--------------|
|                                                    | +?+      |             | het_P:          | 0.234               | het_I:               | 29.2          |              |
|                                                    | ngt      | info        | p_value         | f_ca(n)             | f_co(n)              | ln(OR)        | STDerr       |
| PGC_SCZ wave3 eur only                             | 0        | 0.83        | 3.88e-07        | 0.971(53386)        | 0.974(77258)         | -0.146        | 0.029        |
| PGC_SCZ latino only                                | -        | 0.94        | 0.0655          | -(1234)             | 0.99(3090)           | -0.43         | 0.233        |
| PGC_SCZ wave2 only                                 | 0        | 0.86        | 6.73e-06        | 0.97(34850)         | 0.973(44347)         | -0.162        | 0.036        |
| PGC_SCZ wave3 (excl. wave2)                        | 0        | 0.83        | 0.0018          | 0.978(39926)        | 0.978(56676)         | -0.143        | 0.046        |
| <b>PGC_SCZ wave3 (incl. wave2)</b>                 | <b>0</b> | <b>0.84</b> | <b>4.63e-08</b> | <b>0.974(74776)</b> | <b>0.976(101023)</b> | <b>-0.155</b> | <b>0.028</b> |
| Decode - Replication                               | -        | 0.99        | 0.146           | 0.975(1979)         | 0.968(142627)        | -0.188        | 0.129        |
| <b>PGC_SCZ wave3 (incl. wave2 and replication)</b> | <b>0</b> | <b>0.93</b> | <b>1.63e-08</b> | <b>0.974(76755)</b> | <b>0.972(243650)</b> | <b>-0.156</b> | <b>0.028</b> |

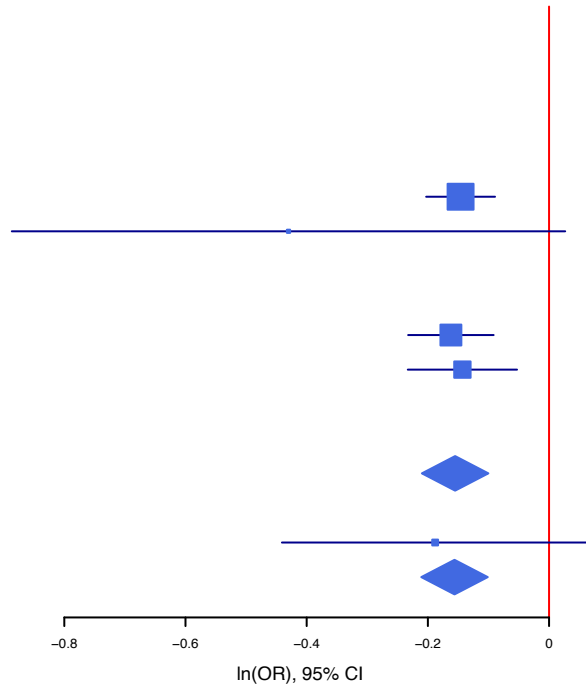

rs215483

G/A 4:23377121  
++- het\_P: 0.019 het\_I: 74.8

|                        | ngt | info | p_value | f_ca(n)      | f_co(n)      | ln(OR) | STDerr |
|------------------------|-----|------|---------|--------------|--------------|--------|--------|
| PGC_SCZ wave3 eur only | 0   | 0.99 | 1.5e-09 | 0.654(53386) | 0.665(77258) | -0.055 | 0.009  |
| PGC_SCZ wave3 asn only | 0   | 0.96 | 0.238   | 0.804(14004) | 0.809(16757) | -0.026 | 0.022  |
| PGC_SCZ afram only     | -   | 0.95 | 0.17    | -(6152)      | 0.497(3918)  | -0.041 | 0.03   |
| PGC_SCZ latino only    | -   | 1.00 | 0.0421  | -(1234)      | 0.806(3090)  | 0.129  | 0.063  |

|                             |   |      |          |              |              |        |       |
|-----------------------------|---|------|----------|--------------|--------------|--------|-------|
| PGC_SCZ wave2 only          | 0 | 0.99 | 1.68e-08 | 0.657(34850) | 0.665(44347) | -0.065 | 0.012 |
| PGC_SCZ wave3 (excl. wave2) | 0 | 0.98 | 0.00693  | 0.69(39926)  | 0.695(56676) | -0.03  | 0.011 |

**PGC\_SCZ wave3 (incl. wave2)** 0 0.98 4.23e-09 0.677(74776) 0.684(101023) -0.047 0.008

Decode - Replication - 1.00 0.538 0.659(1979) 0.685(142627) 0.024 0.039

**PGC\_SCZ wave3 (incl. wave2 and replication)** 0 0.99 1.65e-08 0.677(76755) 0.685(243650) -0.044 0.008

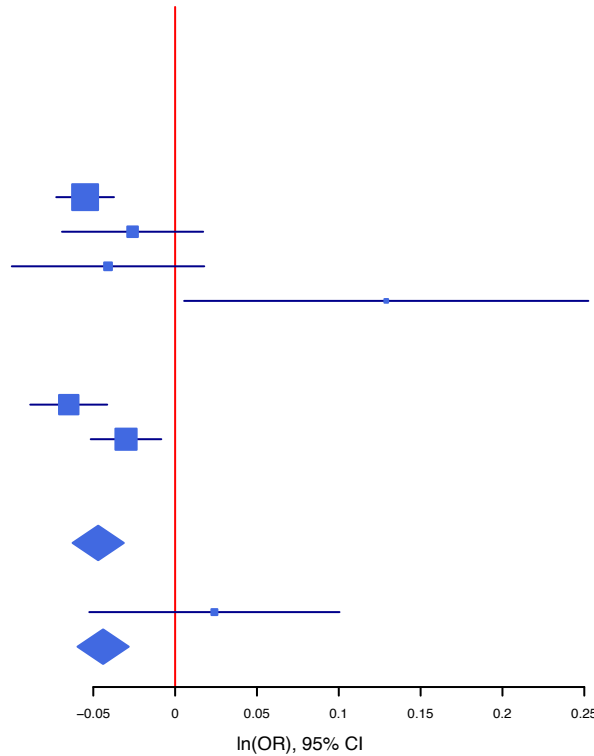

| rs11647188                                         | A/G      |             | 16:82648514     |                     | 0.687                | het_I:       | 0.0          |
|----------------------------------------------------|----------|-------------|-----------------|---------------------|----------------------|--------------|--------------|
|                                                    | +++      | het_P:      |                 |                     |                      |              |              |
|                                                    | ngt      | info        | p_value         | f_ca(n)             | f_co(n)              | ln(OR)       | STDerr       |
| PGC_SCZ wave3 eur only                             | 0        | 0.99        | 7.98e-08        | 0.606(53386)        | 0.596(77258)         | 0.048        | 0.009        |
| PGC_SCZ wave3 asn only                             | 0        | 0.93        | 0.142           | 0.278(14004)        | 0.27(16757)          | 0.029        | 0.02         |
| PGC_SCZ afram only                                 | -        | 0.99        | 0.352           | -(6152)             | 0.416(3918)          | 0.028        | 0.03         |
| PGC_SCZ latino only                                | -        | 0.98        | 0.121           | -(1234)             | 0.51(3090)           | 0.078        | 0.05         |
| PGC_SCZ wave2 only                                 | 0        | 0.99        | 0.000143        | 0.587(34850)        | 0.589(44347)         | 0.043        | 0.011        |
| PGC_SCZ wave3 (excl. wave2)                        | 0        | 0.97        | 1.82e-05        | 0.477(39926)        | 0.483(56676)         | 0.046        | 0.011        |
| <b>PGC_SCZ wave3 (incl. wave2)</b>                 | <b>0</b> | <b>0.98</b> | <b>1.08e-08</b> | <b>0.52(74776)</b>  | <b>0.524(101023)</b> | <b>0.044</b> | <b>0.008</b> |
| Decode – Replication                               | -        | 1.00        | 0.941           | 0.588(1979)         | 0.583(142627)        | 0.003        | 0.039        |
| <b>PGC_SCZ wave3 (incl. wave2 and replication)</b> | <b>0</b> | <b>0.99</b> | <b>1.65e-08</b> | <b>0.521(76755)</b> | <b>0.556(243650)</b> | <b>0.043</b> | <b>0.008</b> |

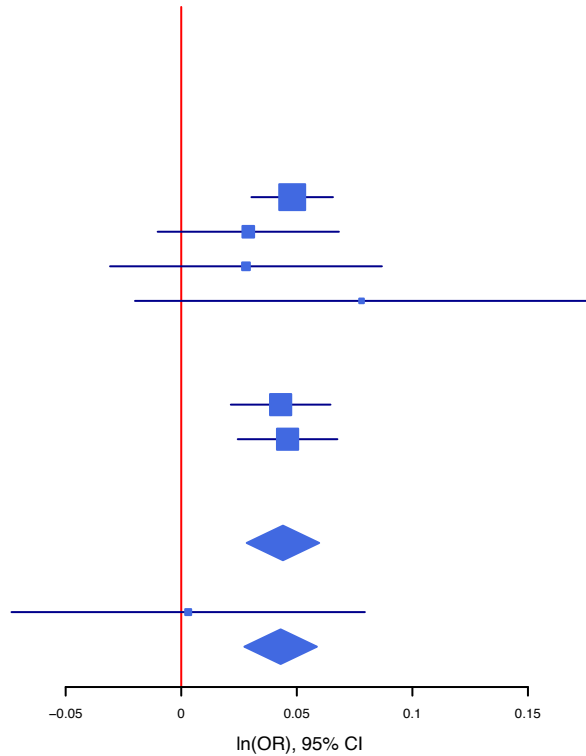

| rs7531138                                          | T/A      |             | 1:97923499      |                     | het_P:               | 0.389        | het_I:       | 0.0 |
|----------------------------------------------------|----------|-------------|-----------------|---------------------|----------------------|--------------|--------------|-----|
|                                                    | ---      |             |                 |                     |                      |              |              |     |
|                                                    | ngt      | info        | p_value         | f_ca(n)             | f_co(n)              | ln(OR)       | STDerr       |     |
| PGC_SCZ wave3 eur only                             | 0        | 0.99        | 3.84e-06        | 0.56(53386)         | 0.549(77258)         | 0.04         | 0.009        |     |
| PGC_SCZ wave3 asn only                             | 0        | 0.94        | 0.0104          | 0.79(14004)         | 0.782(16757)         | 0.055        | 0.022        |     |
| PGC_SCZ afram only                                 | -        | 0.94        | 0.1             | -(6152)             | 0.646(3918)          | 0.052        | 0.032        |     |
| PGC_SCZ latino only                                | -        | 0.96        | 0.0327          | -(1234)             | 0.687(3090)          | 0.118        | 0.055        |     |
| PGC_SCZ wave2 only                                 | 0        | 0.99        | 0.000718        | 0.574(34850)        | 0.553(44347)         | 0.037        | 0.011        |     |
| PGC_SCZ wave3 (excl. wave2)                        | 0        | 0.96        | 2.39e-06        | 0.653(39926)        | 0.636(56676)         | 0.052        | 0.011        |     |
| <b>PGC_SCZ wave3 (incl. wave2)</b>                 | <b>0</b> | <b>0.97</b> | <b>1.04e-08</b> | <b>0.622(74776)</b> | <b>0.604(101023)</b> | <b>0.044</b> | <b>0.008</b> |     |
| Decode – Replication                               | -        | 1.00        | 0.778           | 0.512(1979)         | 0.519(142627)        | 0.011        | 0.037        |     |
| <b>PGC_SCZ wave3 (incl. wave2 and replication)</b> | <b>0</b> | <b>0.99</b> | <b>1.69e-08</b> | <b>0.62(76755)</b>  | <b>0.557(243650)</b> | <b>0.043</b> | <b>0.008</b> |     |

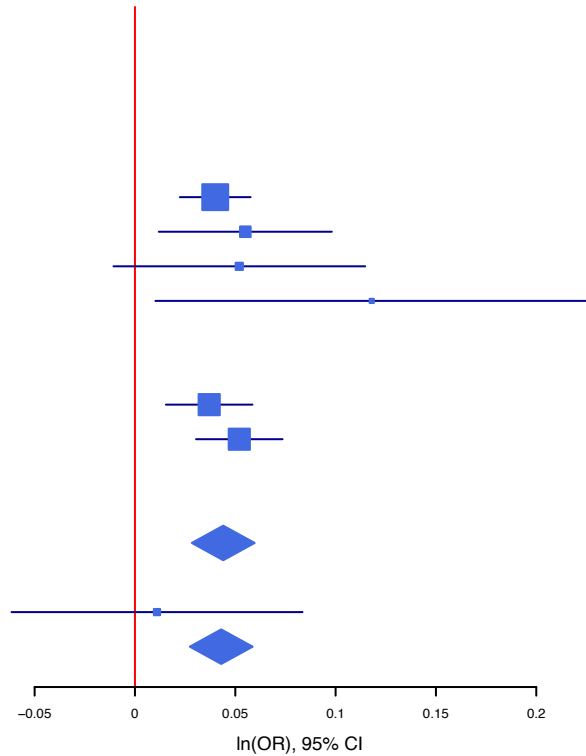





| rs1023330                                          | C/T       |             | 1:95586773      |                     | het_P:               | 0.088         | het_I:       | 58.9 |
|----------------------------------------------------|-----------|-------------|-----------------|---------------------|----------------------|---------------|--------------|------|
|                                                    | ngt       | info        | p_value         | f_ca(n)             |                      |               |              |      |
| PGC_SCZ wave3 eur only                             | 65        | 1.00        | 1.61e-06        | 0.635(53386)        | 0.641(77258)         | -0.043        | 0.009        |      |
| PGC_SCZ wave3 asn only                             | 7         | 0.98        | 0.262           | 0.836(14004)        | 0.839(16757)         | -0.026        | 0.023        |      |
| PGC_SCZ afram only                                 | -         | 1.01        | 0.159           | -(6152)             | 0.855(3918)          | -0.059        | 0.042        |      |
| PGC_SCZ latino only                                | -         | 1.01        | 0.0025          | -(1234)             | 0.553(3090)          | -0.151        | 0.05         |      |
| PGC_SCZ wave2 only                                 | 28        | 1.00        | 3.58e-05        | 0.641(34850)        | 0.64(44347)          | -0.047        | 0.011        |      |
| PGC_SCZ wave3 (excl. wave2)                        | 44        | 0.99        | 0.000295        | 0.711(39926)        | 0.707(56676)         | -0.042        | 0.012        |      |
| <b>PGC_SCZ wave3 (incl. wave2)</b>                 | <b>72</b> | <b>1.00</b> | <b>4.63e-08</b> | <b>0.684(74776)</b> | <b>0.681(101023)</b> | <b>-0.044</b> | <b>0.008</b> |      |
| Decode – Replication                               | -         | 1.00        | 0.201           | 0.64(1979)          | 0.642(142627)        | -0.049        | 0.038        |      |
| <b>PGC_SCZ wave3 (incl. wave2 and replication)</b> | <b>72</b> | <b>1.00</b> | <b>1.83e-08</b> | <b>0.683(76755)</b> | <b>0.659(243650)</b> | <b>-0.045</b> | <b>0.008</b> |      |

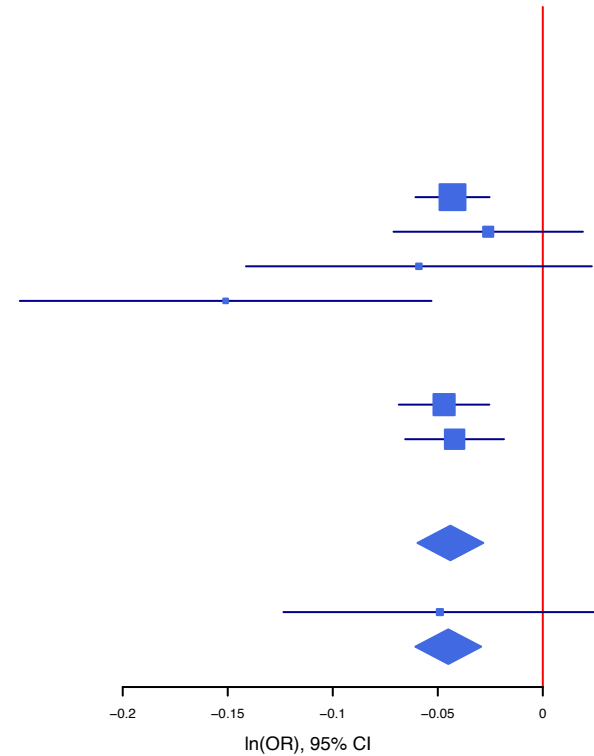

| rs8096175                                          | G/T      |             | 18:4992676      |                    | het_P:               | 0.6           | het_I:      | 0.0 |
|----------------------------------------------------|----------|-------------|-----------------|--------------------|----------------------|---------------|-------------|-----|
|                                                    | ngt      | info        | p_value         | f_ca(n)            |                      |               |             |     |
| PGC_SCZ wave3 eur only                             | 0        | 0.99        | 6.08e-06        | 0.842(53386)       | 0.847(77258)         | -0.054        | 0.012       |     |
| PGC_SCZ wave3 asn only                             | 0        | 0.92        | 0.0109          | 0.7(14004)         | 0.708(16757)         | -0.049        | 0.019       |     |
| PGC_SCZ afram only                                 | -        | 0.94        | 0.893           | -(6152)            | 0.873(3918)          | -0.006        | 0.045       |     |
| PGC_SCZ latino only                                | -        | 1.00        | 0.479           | -(1234)            | 0.821(3090)          | -0.046        | 0.065       |     |
| PGC_SCZ wave2 only                                 | 0        | 0.99        | 3.48e-05        | 0.835(34850)       | 0.847(44347)         | -0.062        | 0.015       |     |
| PGC_SCZ wave3 (excl. wave2)                        | 0        | 0.97        | 0.00133         | 0.811(39926)       | 0.814(56676)         | -0.042        | 0.013       |     |
| <b>PGC_SCZ wave3 (incl. wave2)</b>                 | <b>0</b> | <b>0.98</b> | <b>2.48e-07</b> | <b>0.82(74776)</b> | <b>0.827(101023)</b> | <b>-0.05</b>  | <b>0.01</b> |     |
| Decode – Replication                               | -        | 1.00        | 0.00532         | 0.83(1979)         | 0.823(142627)        | -0.14         | 0.05        |     |
| <b>PGC_SCZ wave3 (incl. wave2 and replication)</b> | <b>0</b> | <b>0.99</b> | <b>1.91e-08</b> | <b>0.82(76755)</b> | <b>0.825(243650)</b> | <b>-0.053</b> | <b>0.01</b> |     |

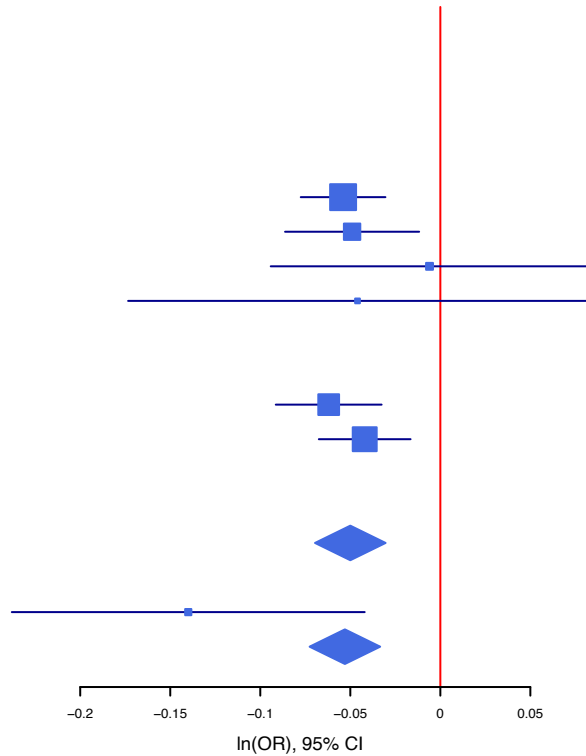

rs2890914                    **A/G**                    **9:10239181**  
 ---+                    het\_P:                    0.462    het\_I:                    0.0

|                                                    | ngt       | info        | p_value         | f_ca(n)             | f_co(n)              | ln(OR)        | STDerr       |
|----------------------------------------------------|-----------|-------------|-----------------|---------------------|----------------------|---------------|--------------|
| PGC_SCZ wave3 eur only                             | 7         | 0.99        | 3.86e-05        | 0.498(53386)        | 0.509(77258)         | -0.036        | 0.009        |
| PGC_SCZ wave3 asn only                             | 3         | 0.99        | 1.83e-05        | 0.382(14004)        | 0.401(16757)         | -0.075        | 0.018        |
| PGC_SCZ afram only                                 | -         | 0.97        | 0.576           | -(6152)             | 0.737(3918)          | -0.019        | 0.034        |
| PGC_SCZ latino only                                | -         | 1.00        | 0.841           | -(1234)             | 0.562(3090)          | 0.01          | 0.05         |
| PGC_SCZ wave2 only                                 | 2         | 0.99        | 0.000148        | 0.491(34850)        | 0.507(44347)         | -0.041        | 0.011        |
| PGC_SCZ wave3 (excl. wave2)                        | 8         | 0.99        | 7.73e-05        | 0.533(39926)        | 0.527(56676)         | -0.041        | 0.01         |
| <b>PGC_SCZ wave3 (incl. wave2)</b>                 | <b>10</b> | <b>0.99</b> | <b>3.73e-08</b> | <b>0.516(74776)</b> | <b>0.52(101023)</b>  | <b>-0.041</b> | <b>0.007</b> |
| Decode – Replication                               | -         | 1.00        | 0.308           | 0.5(1979)           | 0.505(142627)        | -0.038        | 0.038        |
| <b>PGC_SCZ wave3 (incl. wave2 and replication)</b> | <b>10</b> | <b>1.00</b> | <b>1.92e-08</b> | <b>0.516(76755)</b> | <b>0.512(243650)</b> | <b>-0.041</b> | <b>0.007</b> |

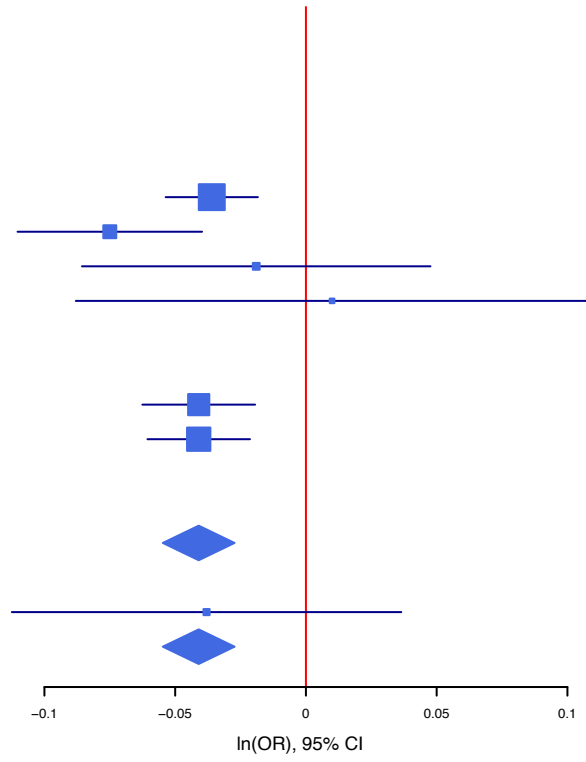

| rs12877581                                         | G/C      |             | 13:74325499     |                     | het_P:               | 0.411         | het_I:       | 0.0 |
|----------------------------------------------------|----------|-------------|-----------------|---------------------|----------------------|---------------|--------------|-----|
|                                                    | +++      |             |                 |                     |                      |               |              |     |
|                                                    | ngt      | info        | p_value         | f_ca(n)             | f_co(n)              | ln(OR)        | STDerr       |     |
| PGC_SCZ wave3 eur only                             | 0        | 0.94        | 1.8e-09         | 0.716(53386)        | 0.723(77258)         | -0.06         | 0.01         |     |
| PGC_SCZ wave3 asn only                             | 1        | 0.68        | 0.273           | 0.866(14004)        | 0.857(16757)         | 0.033         | 0.03         |     |
| PGC_SCZ afram only                                 | -        | 0.92        | 0.823           | -(6152)             | 0.947(3918)          | -0.015        | 0.069        |     |
| PGC_SCZ latino only                                | -        | 0.92        | 0.0533          | -(1234)             | 0.858(3090)          | -0.14         | 0.072        |     |
| PGC_SCZ wave2 only                                 | 0        | 0.92        | 2.42e-08        | 0.722(34850)        | 0.726(44347)         | -0.07         | 0.013        |     |
| PGC_SCZ wave3 (excl. wave2)                        | 1        | 0.88        | 0.03            | 0.825(39926)        | 0.807(56676)         | -0.03         | 0.014        |     |
| <b>PGC_SCZ wave3 (incl. wave2)</b>                 | <b>1</b> | <b>0.90</b> | <b>2.44e-08</b> | <b>0.785(74776)</b> | <b>0.776(101023)</b> | <b>-0.052</b> | <b>0.009</b> |     |
| Decode – Replication                               | -        | 1.00        | 0.483           | 0.732(1979)         | 0.694(142627)        | -0.029        | 0.042        |     |
| <b>PGC_SCZ wave3 (incl. wave2 and replication)</b> | <b>1</b> | <b>0.95</b> | <b>1.93e-08</b> | <b>0.784(76755)</b> | <b>0.73(243650)</b>  | <b>-0.051</b> | <b>0.009</b> |     |

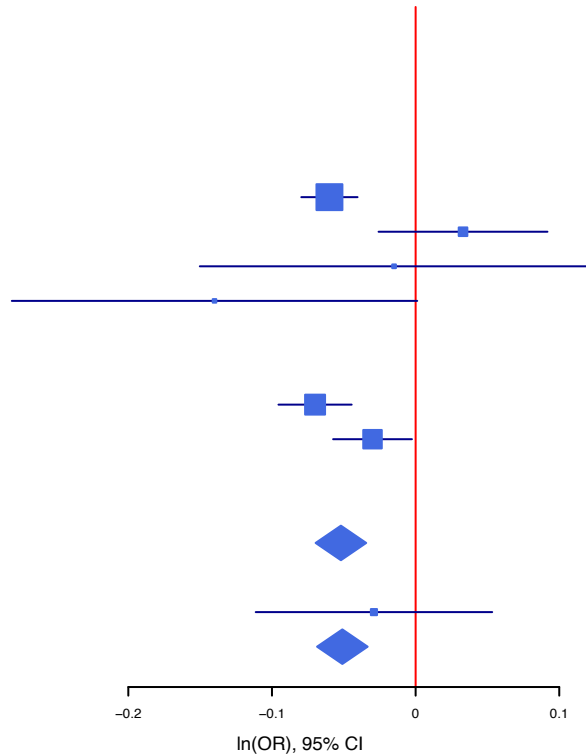

| rs10781248                                         | T/C       |             | 9:77329557      |                     | het_P:               | 0.655        | het_I:       | 0.0 |
|----------------------------------------------------|-----------|-------------|-----------------|---------------------|----------------------|--------------|--------------|-----|
|                                                    | ++        | +-          | het_P:          | het_I:              |                      |              |              |     |
|                                                    | ngt       | info        | p_value         | f_ca(n)             | f_co(n)              | ln(OR)       | STDerr       |     |
| PGC_SCZ wave3 eur only                             | 32        | 0.96        | 7.37e-08        | 0.447(53386)        | 0.444(77258)         | 0.048        | 0.009        |     |
| PGC_SCZ wave3 asn only                             | 4         | 0.85        | 0.278           | 0.537(14004)        | 0.534(16757)         | 0.02         | 0.018        |     |
| PGC_SCZ afram only                                 | -         | 1.01        | 0.129           | -(6152)             | 0.329(3918)          | 0.047        | 0.031        |     |
| PGC_SCZ latino only                                | -         | 1.03        | 0.932           | -(1234)             | 0.617(3090)          | -0.004       | 0.051        |     |
| PGC_SCZ wave2 only                                 | 2         | 0.94        | 2.73e-06        | 0.461(34850)        | 0.45(44347)          | 0.052        | 0.011        |     |
| PGC_SCZ wave3 (excl. wave2)                        | 34        | 0.96        | 0.00203         | 0.472(39926)        | 0.47(56676)          | 0.032        | 0.01         |     |
| <b>PGC_SCZ wave3 (incl. wave2)</b>                 | <b>36</b> | <b>0.95</b> | <b>5.43e-08</b> | <b>0.468(74776)</b> | <b>0.462(101023)</b> | <b>0.042</b> | <b>0.008</b> |     |
| Decode – Replication                               | -         | 1.00        | 0.111           | 0.425(1979)         | 0.44(142627)         | 0.061        | 0.038        |     |
| <b>PGC_SCZ wave3 (incl. wave2 and replication)</b> | <b>36</b> | <b>0.98</b> | <b>2.02e-08</b> | <b>0.467(76755)</b> | <b>0.45(243650)</b>  | <b>0.042</b> | <b>0.008</b> |     |

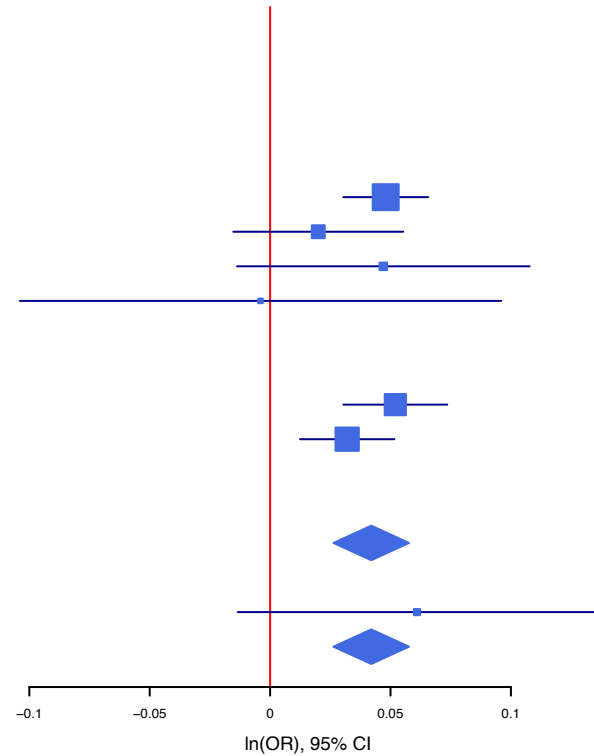

| rs62291002                                         | T/C      |             | 3:180177069     |                     | het_P:              | 0.145        | het_I:       | 48.2 |
|----------------------------------------------------|----------|-------------|-----------------|---------------------|---------------------|--------------|--------------|------|
|                                                    | ngt      | info        | p_value         | f_ca(n)             |                     |              |              |      |
| PGC_SCZ wave3 eur only                             | 0        | 0.93        | 1.29e-06        | 0.84(53386)         | 0.832(77258)        | 0.058        | 0.012        |      |
| PGC_SCZ wave3 asn only                             | 0        | 0.45        | 0.896           | 0.98(14004)         | 0.977(16757)        | 0.013        | 0.097        |      |
| PGC_SCZ afram only                                 | -        | 0.86        | 0.177           | -(6152)             | 0.842(3918)         | 0.058        | 0.043        |      |
| PGC_SCZ latino only                                | -        | 0.93        | 0.00475         | -(1234)             | 0.826(3090)         | 0.196        | 0.07         |      |
| PGC_SCZ wave2 only                                 | 0        | 0.94        | 0.000841        | 0.848(34850)        | 0.835(44347)        | 0.051        | 0.015        |      |
| PGC_SCZ wave3 (excl. wave2)                        | 0        | 0.82        | 1.32e-05        | 0.865(39926)        | 0.861(56676)        | 0.074        | 0.017        |      |
| <b>PGC_SCZ wave3 (incl. wave2)</b>                 | <b>0</b> | <b>0.86</b> | <b>6.74e-08</b> | <b>0.858(74776)</b> | <b>0.85(101023)</b> | <b>0.061</b> | <b>0.011</b> |      |
| Decode – Replication                               | -        | 1.00        | 0.111           | 0.805(1979)         | 0.813(142627)       | 0.085        | 0.053        |      |
| <b>PGC_SCZ wave3 (incl. wave2 and replication)</b> | <b>0</b> | <b>0.94</b> | <b>2.04e-08</b> | <b>0.857(76755)</b> | <b>0.83(243650)</b> | <b>0.062</b> | <b>0.011</b> |      |

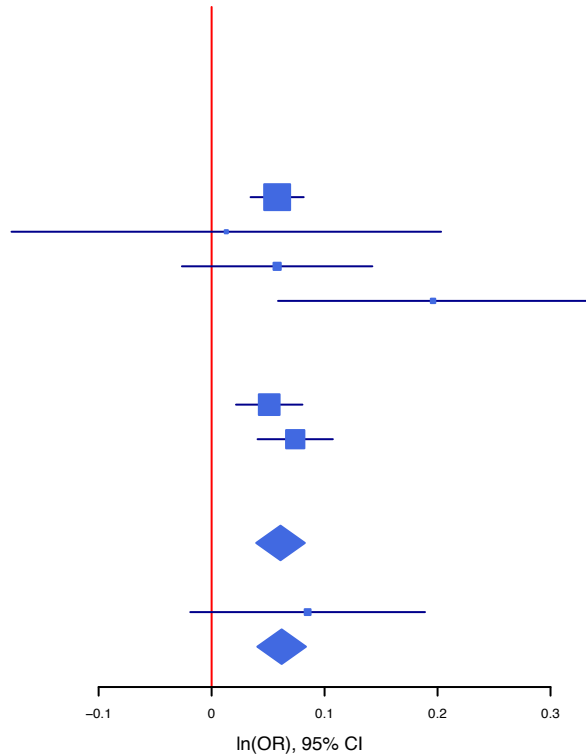

rs10808292

C/T 7:137103538  
 --- het\_P: 0.119 het\_I: 53.1

|                                                    | ngt      | info        | p_value         | f_ca(n)             | f_co(n)              | ln(OR)       | STDerr       |
|----------------------------------------------------|----------|-------------|-----------------|---------------------|----------------------|--------------|--------------|
| PGC_SCZ wave3 eur only                             | 0        | 0.99        | 3.25e-05        | 0.643(53386)        | 0.638(77258)         | 0.037        | 0.009        |
| PGC_SCZ wave3 asn only                             | 0        | 0.92        | 0.00157         | 0.31(14004)         | 0.292(16757)         | 0.062        | 0.02         |
| PGC_SCZ afram only                                 | -        | 0.96        | 0.461           | -(6152)             | 0.606(3918)          | 0.022        | 0.03         |
| PGC_SCZ latino only                                | -        | 1.03        | 0.0054          | -(1234)             | 0.389(3090)          | 0.143        | 0.051        |
| PGC_SCZ wave2 only                                 | 0        | 0.99        | 0.00533         | 0.626(34850)        | 0.633(44347)         | 0.032        | 0.011        |
| PGC_SCZ wave3 (excl. wave2)                        | 0        | 0.97        | 9.48e-07        | 0.51(39926)         | 0.518(56676)         | 0.053        | 0.011        |
| <b>PGC_SCZ wave3 (incl. wave2)</b>                 | <b>0</b> | <b>0.98</b> | <b>4.3e-08</b>  | <b>0.556(74776)</b> | <b>0.561(101023)</b> | <b>0.043</b> | <b>0.008</b> |
| Decode – Replication                               | -        | 1.00        | 0.272           | 0.619(1979)         | 0.628(142627)        | 0.043        | 0.04         |
| <b>PGC_SCZ wave3 (incl. wave2 and replication)</b> | <b>0</b> | <b>0.99</b> | <b>2.04e-08</b> | <b>0.557(76755)</b> | <b>0.598(243650)</b> | <b>0.043</b> | <b>0.008</b> |

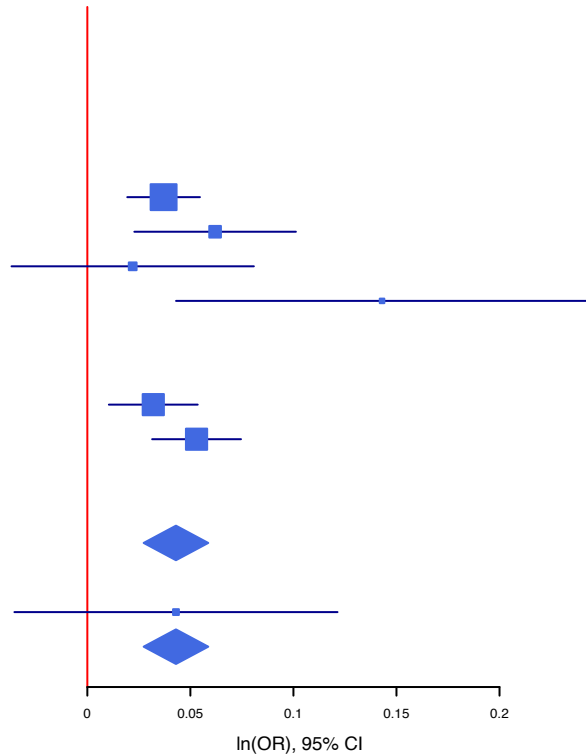



rs745467

G/A  
---  
14:91122317  
het\_P: 0.823 het\_I: 0.0

|                                                    | ngt       | info        | p_value         | f_ca(n)             | f_co(n)              | ln(OR)       | STDerr       |
|----------------------------------------------------|-----------|-------------|-----------------|---------------------|----------------------|--------------|--------------|
| PGC_SCZ wave3 eur only                             | 13        | 0.91        | 7.37e-05        | 0.929(53386)        | 0.924(77258)         | 0.069        | 0.017        |
| PGC_SCZ wave3 asn only                             | 4         | 0.85        | 0.00401         | 0.849(14004)        | 0.836(16757)         | 0.073        | 0.025        |
| PGC_SCZ afram only                                 | -         | 0.83        | 0.184           | -(6152)             | 0.973(3918)          | 0.131        | 0.098        |
| PGC_SCZ latino only                                | -         | 1.00        | 0.292           | -(1234)             | 0.758(3090)          | 0.063        | 0.06         |
| PGC_SCZ wave2 only                                 | 11        | 0.94        | 1.48e-05        | 0.922(34850)        | 0.918(44347)         | 0.09         | 0.021        |
| PGC_SCZ wave3 (excl. wave2)                        | 6         | 0.88        | 0.00244         | 0.888(39926)        | 0.889(56676)         | 0.056        | 0.018        |
| <b>PGC_SCZ wave3 (incl. wave2)</b>                 | <b>17</b> | <b>0.90</b> | <b>2.81e-07</b> | <b>0.902(74776)</b> | <b>0.9(101023)</b>   | <b>0.071</b> | <b>0.014</b> |
| Decode – Replication                               | -         | 1.00        | 0.00421         | 0.918(1979)         | 0.928(142627)        | 0.186        | 0.065        |
| <b>PGC_SCZ wave3 (incl. wave2 and replication)</b> | <b>17</b> | <b>0.96</b> | <b>2.08e-08</b> | <b>0.902(76755)</b> | <b>0.916(243650)</b> | <b>0.076</b> | <b>0.014</b> |

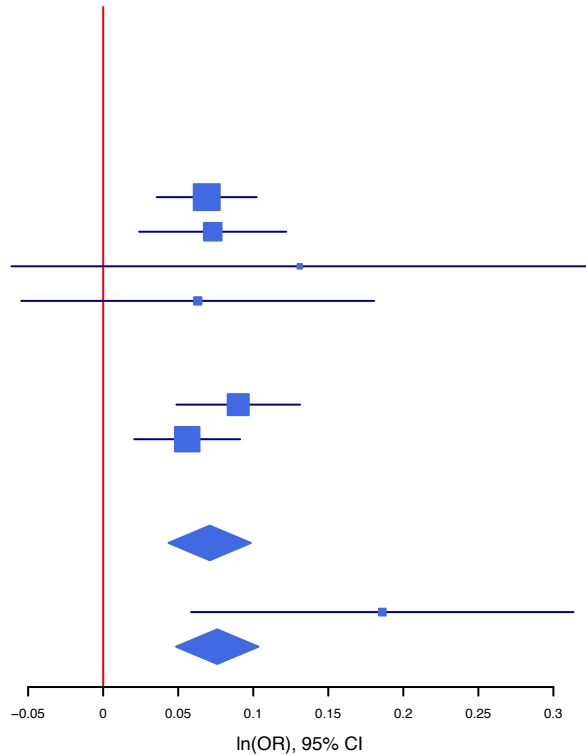

rs12282735

A/G 11:124312902  
--- het\_P: 0.683 het\_I: 0.0

|                                                    | ngt      | info        | p_value        | f_ca(n)             | f_co(n)              | ln(OR)        | STDerr       |
|----------------------------------------------------|----------|-------------|----------------|---------------------|----------------------|---------------|--------------|
| PGC_SCZ wave3 eur only                             | 0        | 0.99        | 1.96e-05       | 0.437(53386)        | 0.447(77258)         | -0.037        | 0.009        |
| PGC_SCZ wave3 asn only                             | 0        | 0.97        | 0.00237        | 0.337(14004)        | 0.348(16757)         | -0.055        | 0.018        |
| PGC_SCZ afram only                                 | -        | 0.98        | 0.418          | -(6152)             | 0.239(3918)          | -0.028        | 0.034        |
| PGC_SCZ latino only                                | -        | 0.98        | 0.127          | -(1234)             | 0.294(3090)          | -0.085        | 0.056        |
| PGC_SCZ wave2 only                                 | 0        | 0.99        | 0.0211         | 0.435(34850)        | 0.444(44347)         | -0.025        | 0.011        |
| PGC_SCZ wave3 (excl. wave2)                        | 0        | 0.98        | 1.64e-07       | 0.345(39926)        | 0.371(56676)         | -0.055        | 0.01         |
| <b>PGC_SCZ wave3 (incl. wave2)</b>                 | <b>0</b> | <b>0.98</b> | <b>6.6e-08</b> | <b>0.38(74776)</b>  | <b>0.399(101023)</b> | <b>-0.041</b> | <b>0.008</b> |
| Decode - Replication                               | -        | 1.00        | 0.149          | 0.468(1979)         | 0.491(142627)        | -0.054        | 0.038        |
| <b>PGC_SCZ wave3 (incl. wave2 and replication)</b> | <b>0</b> | <b>0.99</b> | <b>2.1e-08</b> | <b>0.382(76755)</b> | <b>0.45(243650)</b>  | <b>-0.041</b> | <b>0.007</b> |

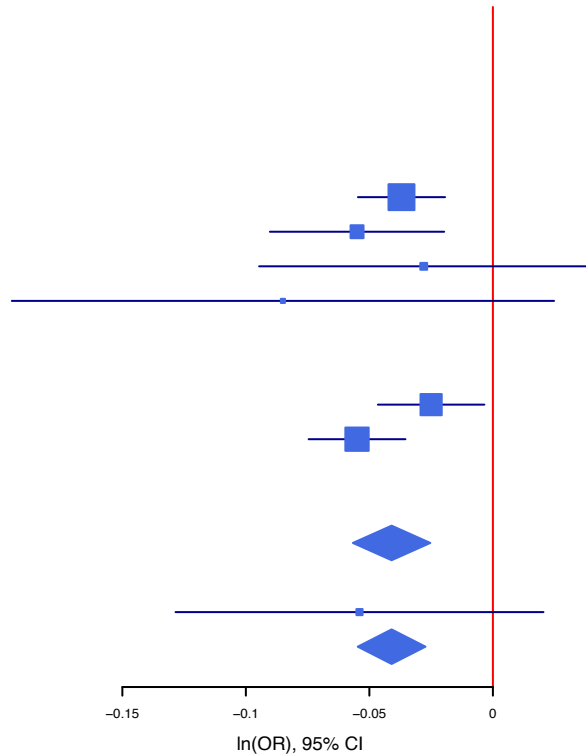

| rs3006926                                          | A/G      |             | 1:243655452     |                     | het_P:               | 0.033        | het_I:       | 70.7 |
|----------------------------------------------------|----------|-------------|-----------------|---------------------|----------------------|--------------|--------------|------|
|                                                    | ngt      | info        | p_value         | f_ca(n)             |                      |              |              |      |
| PGC_SCZ wave3 eur only                             | 6        | 1.00        | 3.47e-07        | 0.781(53386)        | 0.768(77258)         | 0.053        | 0.01         |      |
| PGC_SCZ wave3 asn only                             | 0        | 0.97        | 0.224           | 0.623(14004)        | 0.622(16757)         | 0.022        | 0.018        |      |
| PGC_SCZ afram only                                 | -        | 0.96        | 0.331           | -(6152)             | 0.783(3918)          | 0.035        | 0.036        |      |
| PGC_SCZ latino only                                | -        | 1.00        | 0.000666        | -(1234)             | 0.71(3090)           | 0.194        | 0.057        |      |
| PGC_SCZ wave2 only                                 | 0        | 1.00        | 1.36e-05        | 0.772(34850)        | 0.765(44347)         | 0.056        | 0.013        |      |
| PGC_SCZ wave3 (excl. wave2)                        | 6        | 0.99        | 0.000361        | 0.732(39926)        | 0.728(56676)         | 0.041        | 0.011        |      |
| <b>PGC_SCZ wave3 (incl. wave2)</b>                 | <b>6</b> | <b>0.99</b> | <b>2.53e-08</b> | <b>0.748(74776)</b> | <b>0.743(101023)</b> | <b>0.048</b> | <b>0.008</b> |      |
| Decode – Replication                               | -        | 1.00        | 0.603           | 0.787(1979)         | 0.773(142627)        | 0.023        | 0.044        |      |
| <b>PGC_SCZ wave3 (incl. wave2 and replication)</b> | <b>6</b> | <b>0.99</b> | <b>2.2e-08</b>  | <b>0.749(76755)</b> | <b>0.759(243650)</b> | <b>0.047</b> | <b>0.008</b> |      |

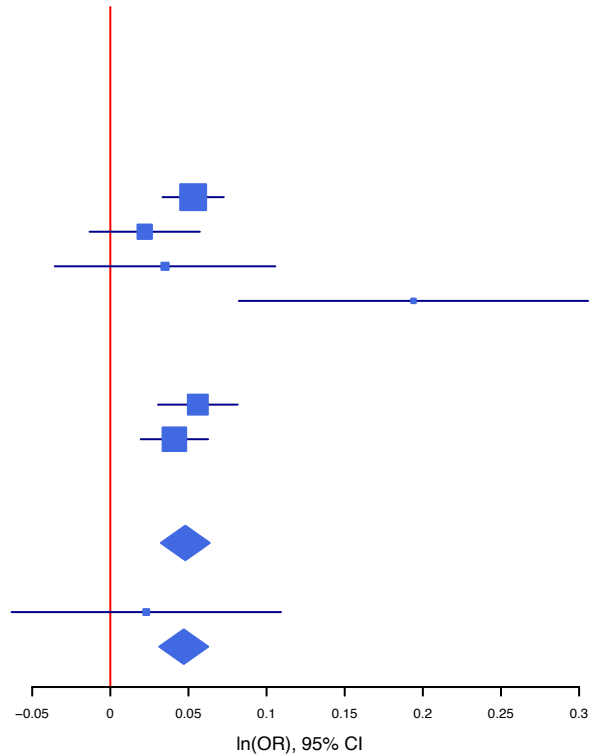

|                                                    | T/C      |             | 4:19896708      |                     | het_P:               | 0.717        | het_I:       | 0.0 |
|----------------------------------------------------|----------|-------------|-----------------|---------------------|----------------------|--------------|--------------|-----|
|                                                    | ngt      | info        | p_value         | f_ca(n)             |                      |              |              |     |
| PGC_SCZ wave3 eur only                             | 0        | 0.99        | 2.87e-05        | 0.95(53386)         | 0.946(77258)         | 0.082        | 0.02         |     |
| PGC_SCZ wave3 asn only                             | 0        | 0.98        | 0.00258         | 0.875(14004)        | 0.867(16757)         | 0.077        | 0.026        |     |
| PGC_SCZ afram only                                 | -        | 0.99        | 0.0471          | -(6152)             | 0.841(3918)          | 0.079        | 0.04         |     |
| PGC_SCZ latino only                                | -        | 1.01        | 0.964           | -(1234)             | 0.92(3090)           | 0.004        | 0.092        |     |
| PGC_SCZ wave2 only                                 | 0        | 0.99        | 0.0017          | 0.947(34850)        | 0.945(44347)         | 0.076        | 0.024        |     |
| PGC_SCZ wave3 (excl. wave2)                        | 0        | 0.99        | 7.73e-06        | 0.905(39926)        | 0.909(56676)         | 0.079        | 0.018        |     |
| <b>PGC_SCZ wave3 (incl. wave2)</b>                 | <b>0</b> | <b>0.99</b> | <b>4.51e-08</b> | <b>0.921(74776)</b> | <b>0.922(101023)</b> | <b>0.078</b> | <b>0.014</b> |     |
| Decode – Replication                               | -        | 1.00        | 0.209           | 0.933(1979)         | 0.932(142627)        | 0.106        | 0.084        |     |
| <b>PGC_SCZ wave3 (incl. wave2 and replication)</b> | <b>0</b> | <b>1.00</b> | <b>2.21e-08</b> | <b>0.921(76755)</b> | <b>0.928(243650)</b> | <b>0.079</b> | <b>0.014</b> |     |

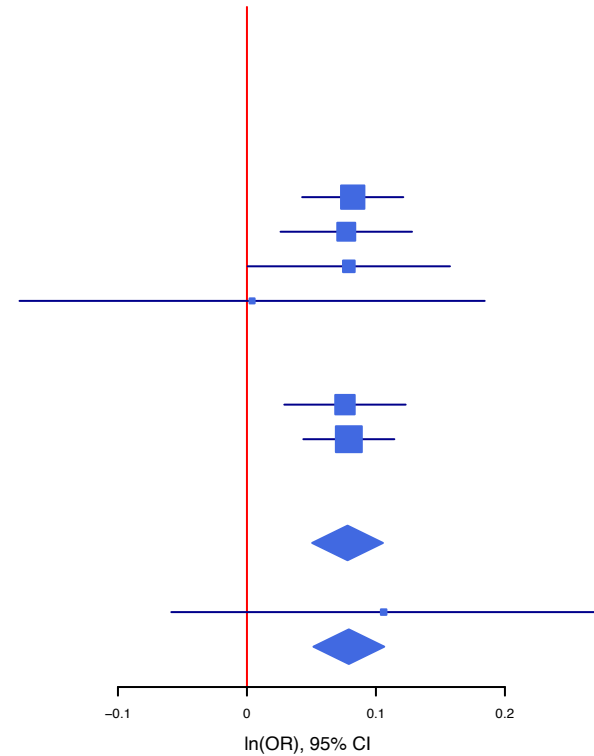

| rs6946576                                          | G/A      |             | 7:139018309     |                     | het_P:               | 0.92         | het_I:       | 0.0 |
|----------------------------------------------------|----------|-------------|-----------------|---------------------|----------------------|--------------|--------------|-----|
|                                                    | ngt      | info        | p_value         | f_ca(n)             |                      |              |              |     |
| PGC_SCZ wave3 eur only                             | 0        | 0.84        | 2.82e-07        | 0.495(53386)        | 0.488(77258)         | 0.048        | 0.009        |     |
| PGC_SCZ wave3 asn only                             | 0        | 0.70        | 0.163           | 0.33(14004)         | 0.32(16757)          | 0.03         | 0.022        |     |
| PGC_SCZ afram only                                 | -        | 0.86        | 0.499           | -(6152)             | 0.116(3918)          | 0.035        | 0.051        |     |
| PGC_SCZ latino only                                | -        | 0.90        | 0.226           | -(1234)             | 0.53(3090)           | 0.064        | 0.053        |     |
| PGC_SCZ wave2 only                                 | 0        | 0.84        | 0.00185         | 0.483(34850)        | 0.484(44347)         | 0.037        | 0.012        |     |
| PGC_SCZ wave3 (excl. wave2)                        | 0        | 0.82        | 4.85e-06        | 0.391(39926)        | 0.401(56676)         | 0.055        | 0.012        |     |
| <b>PGC_SCZ wave3 (incl. wave2)</b>                 | <b>0</b> | <b>0.83</b> | <b>4.94e-08</b> | <b>0.428(74776)</b> | <b>0.433(101023)</b> | <b>0.046</b> | <b>0.008</b> |     |
| Decode – Replication                               | -        | 1.00        | 0.194           | 0.488(1979)         | 0.463(142627)        | 0.05         | 0.039        |     |
| <b>PGC_SCZ wave3 (incl. wave2 and replication)</b> | <b>0</b> | <b>0.92</b> | <b>2.25e-08</b> | <b>0.429(76755)</b> | <b>0.449(243650)</b> | <b>0.046</b> | <b>0.008</b> |     |

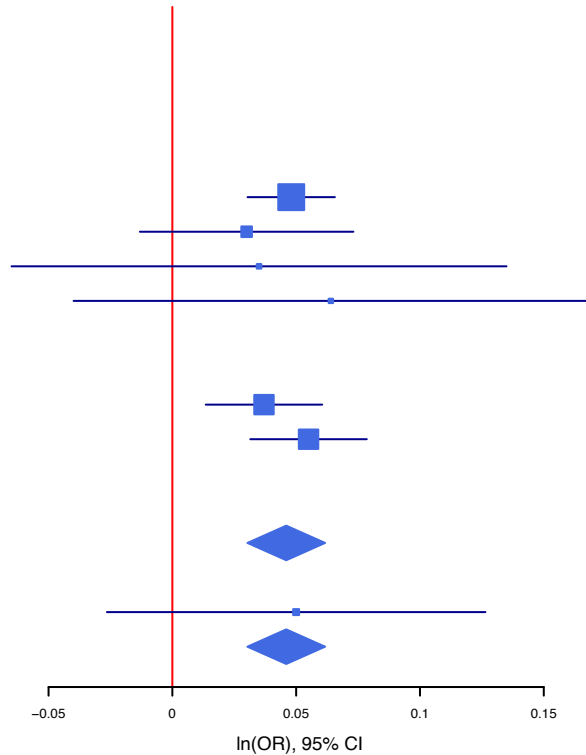

| rs7902292                                          | T/C      | 10:123903556 |                 |                     |                      |             |              |
|----------------------------------------------------|----------|--------------|-----------------|---------------------|----------------------|-------------|--------------|
|                                                    | +++      | het_P:       | 0.814           | het_I:              | 0.0                  |             |              |
|                                                    | ngt      | info         | p_value         | f_ca(n)             | f_co(n)              | ln(OR)      | STDerr       |
| PGC_SCZ wave3 eur only                             | 1        | 0.93         | 6.09e-07        | 0.196(53386)        | 0.186(77258)         | 0.057       | 0.011        |
| PGC_SCZ wave3 asn only                             | 0        | 0.89         | 0.145           | 0.438(14004)        | 0.436(16757)         | 0.027       | 0.018        |
| PGC_SCZ afram only                                 | -        | 0.95         | 0.0272          | -(6152)             | 0.616(3918)          | 0.069       | 0.031        |
| PGC_SCZ latino only                                | -        | 0.97         | 0.412           | -(1234)             | 0.388(3090)          | 0.043       | 0.053        |
| PGC_SCZ wave2 only                                 | 1        | 0.93         | 5.2e-05         | 0.204(34850)        | 0.188(44347)         | 0.058       | 0.014        |
| PGC_SCZ wave3 (excl. wave2)                        | 0        | 0.93         | 0.000155        | 0.375(39926)        | 0.339(56676)         | 0.045       | 0.012        |
| <b>PGC_SCZ wave3 (incl. wave2)</b>                 | <b>1</b> | <b>0.93</b>  | <b>4.43e-08</b> | <b>0.308(74776)</b> | <b>0.281(101023)</b> | <b>0.05</b> | <b>0.009</b> |
| Decode – Replication                               | -        | 1.00         | 0.294           | 0.205(1979)         | 0.208(142627)        | 0.05        | 0.048        |
| <b>PGC_SCZ wave3 (incl. wave2 and replication)</b> | <b>1</b> | <b>0.97</b>  | <b>2.36e-08</b> | <b>0.306(76755)</b> | <b>0.241(243650)</b> | <b>0.05</b> | <b>0.009</b> |

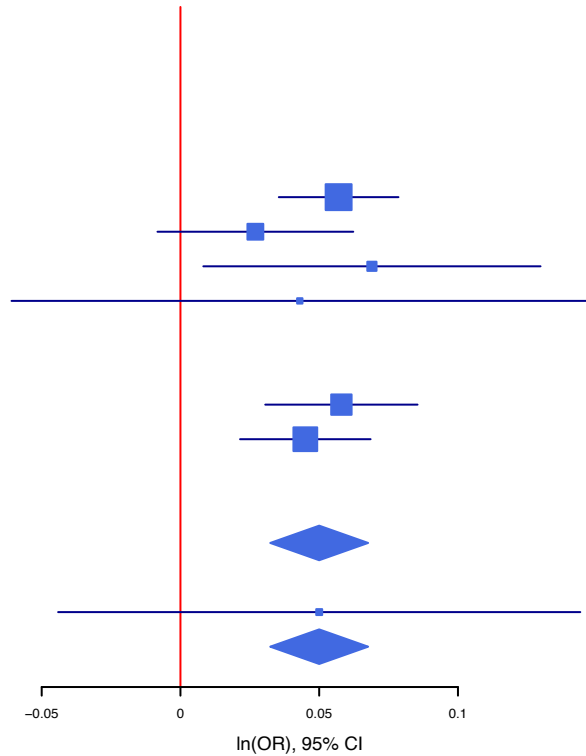

| rs79478621                                         | T/G       |             | 16:7750859      |                     | het_P:               | 0.995        | het_I:       | 0.0 |
|----------------------------------------------------|-----------|-------------|-----------------|---------------------|----------------------|--------------|--------------|-----|
|                                                    | +?+       |             |                 |                     |                      |              |              |     |
|                                                    | ngt       | info        | p_value         | f_ca(n)             | f_co(n)              | ln(OR)       | STDerr       |     |
| PGC_SCZ wave3 eur only                             | 23        | 0.96        | 7.72e-08        | 0.96(53386)         | 0.953(77258)         | 0.117        | 0.022        |     |
| PGC_SCZ latino only                                | -         | 0.90        | 0.629           | -(1234)             | 0.988(3090)          | 0.116        | 0.239        |     |
| PGC_SCZ wave2 only                                 | 0         | 0.96        | 4.97e-06        | 0.958(34850)        | 0.953(44347)         | 0.127        | 0.028        |     |
| PGC_SCZ wave3 (excl. wave2)                        | 23        | 0.91        | 0.00583         | 0.972(39926)        | 0.964(56676)         | 0.095        | 0.034        |     |
| <b>PGC_SCZ wave3 (incl. wave2)</b>                 | <b>23</b> | <b>0.93</b> | <b>1.29e-07</b> | <b>0.965(74776)</b> | <b>0.957(101023)</b> | <b>0.114</b> | <b>0.022</b> |     |
| Decode - Replication                               | -         | 1.00        | 0.0462          | 0.971(1979)         | 0.97(142627)         | 0.204        | 0.102        |     |
| <b>PGC_SCZ wave3 (incl. wave2 and replication)</b> | <b>23</b> | <b>0.97</b> | <b>2.41e-08</b> | <b>0.965(76755)</b> | <b>0.965(243650)</b> | <b>0.118</b> | <b>0.021</b> |     |

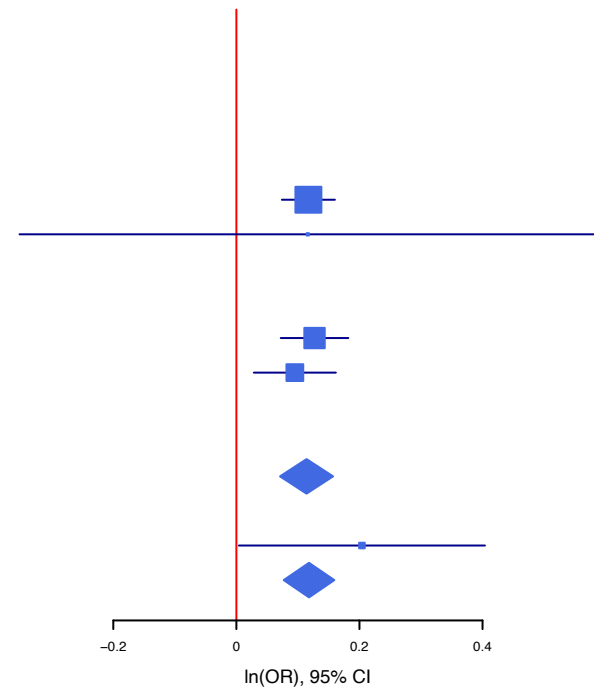

|                                                    | A/C      |             | 6:144903517     |                     | het_P:               | 0.91          | het_I:       | 0.0 |
|----------------------------------------------------|----------|-------------|-----------------|---------------------|----------------------|---------------|--------------|-----|
|                                                    | ngt      | info        | p_value         | f_ca(n)             |                      |               |              |     |
| PGC_SCZ wave3 eur only                             | 0        | 0.99        | 5.39e-05        | 0.953(53386)        | 0.956(77258)         | -0.084        | 0.021        |     |
| PGC_SCZ wave3 asn only                             | 0        | 0.96        | 0.000666        | 0.49(14004)         | 0.496(16757)         | -0.06         | 0.018        |     |
| PGC_SCZ afram only                                 | -        | 0.96        | 0.269           | -(6152)             | 0.884(3918)          | -0.052        | 0.047        |     |
| PGC_SCZ latino only                                | -        | 1.00        | 0.271           | -(1234)             | 0.879(3090)          | -0.086        | 0.078        |     |
| PGC_SCZ wave2 only                                 | 0        | 1.00        | 0.0109          | 0.928(34850)        | 0.946(44347)         | -0.062        | 0.024        |     |
| PGC_SCZ wave3 (excl. wave2)                        | 0        | 0.98        | 1.64e-06        | 0.821(39926)        | 0.832(56676)         | -0.072        | 0.015        |     |
| <b>PGC_SCZ wave3 (incl. wave2)</b>                 | <b>0</b> | <b>0.99</b> | <b>6.75e-08</b> | <b>0.863(74776)</b> | <b>0.875(101023)</b> | <b>-0.069</b> | <b>0.013</b> |     |
| Decode – Replication                               | -        | 1.00        | 0.102           | 0.951(1979)         | 0.948(142627)        | -0.145        | 0.088        |     |
| <b>PGC_SCZ wave3 (incl. wave2 and replication)</b> | <b>0</b> | <b>0.99</b> | <b>2.44e-08</b> | <b>0.865(76755)</b> | <b>0.916(243650)</b> | <b>-0.071</b> | <b>0.013</b> |     |

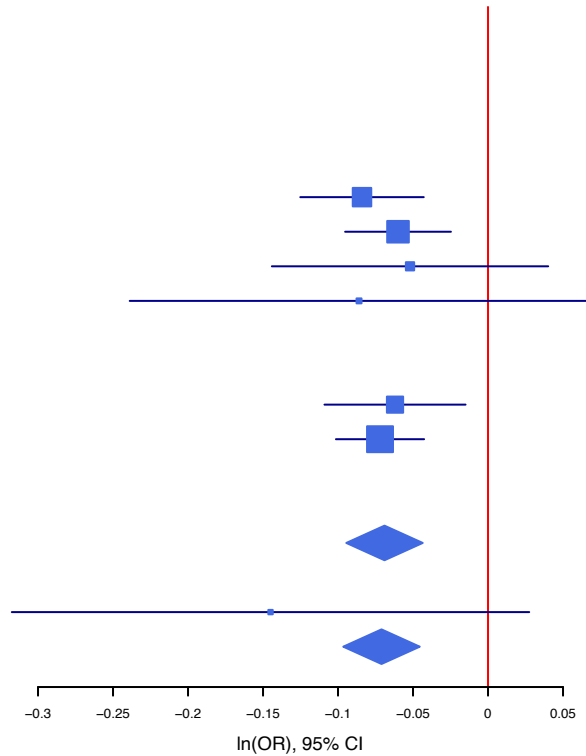



| rs2299409                                          | G/A      |             | 7:103812171     |                     | het_P:               | 0.934        | het_I:       | 0.0 |
|----------------------------------------------------|----------|-------------|-----------------|---------------------|----------------------|--------------|--------------|-----|
|                                                    | ngt      | info        | p_value         | f_ca(n)             |                      |              |              |     |
| PGC_SCZ wave3 eur only                             | 0        | 1.00        | 6.45e-05        | 0.483(53386)        | 0.474(77258)         | 0.034        | 0.009        |     |
| PGC_SCZ wave3 asn only                             | 0        | 0.97        | 7.39e-05        | 0.733(14004)        | 0.726(16757)         | 0.077        | 0.02         |     |
| PGC_SCZ afram only                                 | -        | 0.98        | 0.276           | -(6152)             | 0.836(3918)          | 0.044        | 0.041        |     |
| PGC_SCZ latino only                                | -        | 1.02        | 0.692           | -(1234)             | 0.705(3090)          | 0.022        | 0.054        |     |
| PGC_SCZ wave2 only                                 | 0        | 1.00        | 0.0134          | 0.494(34850)        | 0.481(44347)         | 0.027        | 0.011        |     |
| PGC_SCZ wave3 (excl. wave2)                        | 0        | 0.99        | 3.05e-07        | 0.655(39926)        | 0.618(56676)         | 0.055        | 0.011        |     |
| <b>PGC_SCZ wave3 (incl. wave2)</b>                 | <b>0</b> | <b>0.99</b> | <b>8.56e-08</b> | <b>0.592(74776)</b> | <b>0.566(101023)</b> | <b>0.041</b> | <b>0.008</b> |     |
| Decode – Replication                               | -        | 1.00        | 0.0836          | 0.493(1979)         | 0.502(142627)        | 0.065        | 0.038        |     |
| <b>PGC_SCZ wave3 (incl. wave2 and replication)</b> | <b>0</b> | <b>1.00</b> | <b>2.46e-08</b> | <b>0.59(76755)</b>  | <b>0.531(243650)</b> | <b>0.042</b> | <b>0.008</b> |     |

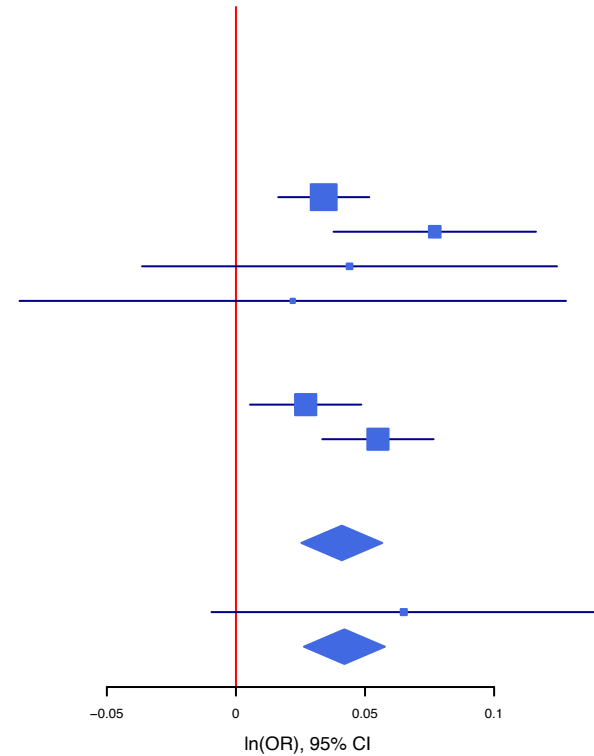

rs513022

C/T 12:99562662  
+--+ het\_P: 0.081 het\_I: 60.1

|                                                    | ngt      | info        | p_value         | f_ca(n)             | f_co(n)              | ln(OR)        | STDerr      |
|----------------------------------------------------|----------|-------------|-----------------|---------------------|----------------------|---------------|-------------|
| PGC_SCZ wave3 eur only                             | 0        | 0.99        | 2.14e-07        | 0.216(53386)        | 0.225(77258)         | -0.054        | 0.01        |
| PGC_SCZ afram only                                 | -        | 0.96        | 0.678           | -(6152)             | 0.069(3918)          | 0.025         | 0.059       |
| PGC_SCZ latino only                                | -        | 0.98        | 0.0131          | -(1234)             | 0.116(3090)          | -0.198        | 0.08        |
| PGC_SCZ wave2 only                                 | 0        | 0.99        | 1.55e-06        | 0.216(34850)        | 0.225(44347)         | -0.064        | 0.013       |
| PGC_SCZ wave3 (excl. wave2)                        | 0        | 0.96        | 0.0109          | 0.141(39926)        | 0.163(56676)         | -0.04         | 0.016       |
| <b>PGC_SCZ wave3 (incl. wave2)</b>                 | <b>0</b> | <b>0.97</b> | <b>1.16e-07</b> | <b>0.175(74776)</b> | <b>0.191(101023)</b> | <b>-0.054</b> | <b>0.01</b> |
| Decode - Replication                               | -        | 1.00        | 0.0503          | 0.25(1979)          | 0.244(142627)        | -0.089        | 0.045       |
| <b>PGC_SCZ wave3 (incl. wave2 and replication)</b> | <b>0</b> | <b>0.99</b> | <b>2.47e-08</b> | <b>0.177(76755)</b> | <b>0.22(243650)</b>  | <b>-0.056</b> | <b>0.01</b> |

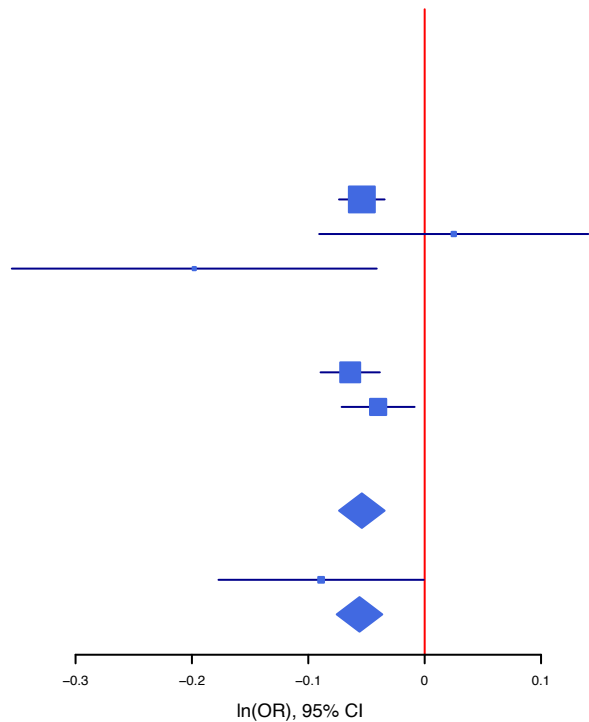

|                                                    | G/A      |             | 12:53730164     |                     |                      |               |              |
|----------------------------------------------------|----------|-------------|-----------------|---------------------|----------------------|---------------|--------------|
|                                                    | +?+      |             | het_P:          | 0.666               | het_I:               | 0.0           |              |
|                                                    | ngt      | info        | p_value         | f_ca(n)             | f_co(n)              | ln(OR)        | STDerr       |
| PGC_SCZ wave3 eur only                             | 1        | 0.76        | 7.19e-08        | 0.96(53386)         | 0.964(77258)         | -0.14         | 0.026        |
| PGC_SCZ latino only                                | -        | 0.86        | 0.267           | -(1234)             | 0.983(3090)          | -0.223        | 0.201        |
| PGC_SCZ wave2 only                                 | 0        | 0.79        | 5.97e-06        | 0.961(34850)        | 0.966(44347)         | -0.151        | 0.033        |
| PGC_SCZ wave3 (excl. wave2)                        | 1        | 0.68        | 0.00281         | 0.969(39926)        | 0.969(56676)         | -0.117        | 0.039        |
| <b>PGC_SCZ wave3 (incl. wave2)</b>                 | <b>1</b> | <b>0.73</b> | <b>7.01e-08</b> | <b>0.965(74776)</b> | <b>0.968(101023)</b> | <b>-0.137</b> | <b>0.025</b> |
| Decode - Replication                               | -        | 1.00        | 0.156           | 0.971(1979)         | 0.962(142627)        | -0.132        | 0.093        |
| <b>PGC_SCZ wave3 (incl. wave2 and replication)</b> | <b>1</b> | <b>0.88</b> | <b>2.5e-08</b>  | <b>0.965(76755)</b> | <b>0.965(243650)</b> | <b>-0.136</b> | <b>0.024</b> |

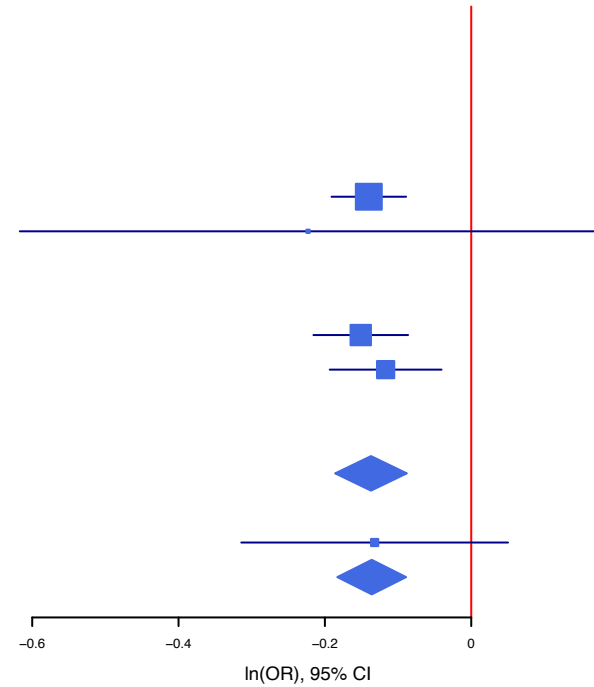

**rs337718**                      **T/C**                      **18:69774278**  
 +-+                                      het\_P:                      0.003    het\_I:                      82.7

|                                                    | ngt       | info        | p_value         | f_ca(n)             | f_co(n)              | ln(OR)       | STDerr       |
|----------------------------------------------------|-----------|-------------|-----------------|---------------------|----------------------|--------------|--------------|
| PGC_SCZ wave3 eur only                             | 43        | 1.00        | 1.02e-06        | 0.301(53386)        | 0.29(77258)          | 0.046        | 0.009        |
| PGC_SCZ wave3 asn only                             | 6         | 0.99        | 0.000884        | 0.324(14004)        | 0.311(16757)         | 0.061        | 0.018        |
| PGC_SCZ afram only                                 | -         | 0.96        | 0.265           | -(6152)             | 0.39(3918)           | -0.034       | 0.03         |
| PGC_SCZ latino only                                | -         | 0.99        | 0.00268         | -(1234)             | 0.312(3090)          | 0.16         | 0.053        |
| PGC_SCZ wave2 only                                 | 11        | 0.99        | 1.35e-05        | 0.303(34850)        | 0.29(44347)          | 0.052        | 0.012        |
| PGC_SCZ wave3 (excl. wave2)                        | 38        | 0.99        | 0.000134        | 0.325(39926)        | 0.313(56676)         | 0.041        | 0.011        |
| <b>PGC_SCZ wave3 (incl. wave2)</b>                 | <b>49</b> | <b>0.99</b> | <b>9.41e-09</b> | <b>0.316(74776)</b> | <b>0.305(101023)</b> | <b>0.046</b> | <b>0.008</b> |
| Decode – Replication                               | -         | 1.00        | 0.672           | 0.305(1979)         | 0.295(142627)        | -0.018       | 0.043        |
| <b>PGC_SCZ wave3 (incl. wave2 and replication)</b> | <b>49</b> | <b>1.00</b> | <b>2.5e-08</b>  | <b>0.316(76755)</b> | <b>0.3(243650)</b>   | <b>0.044</b> | <b>0.008</b> |

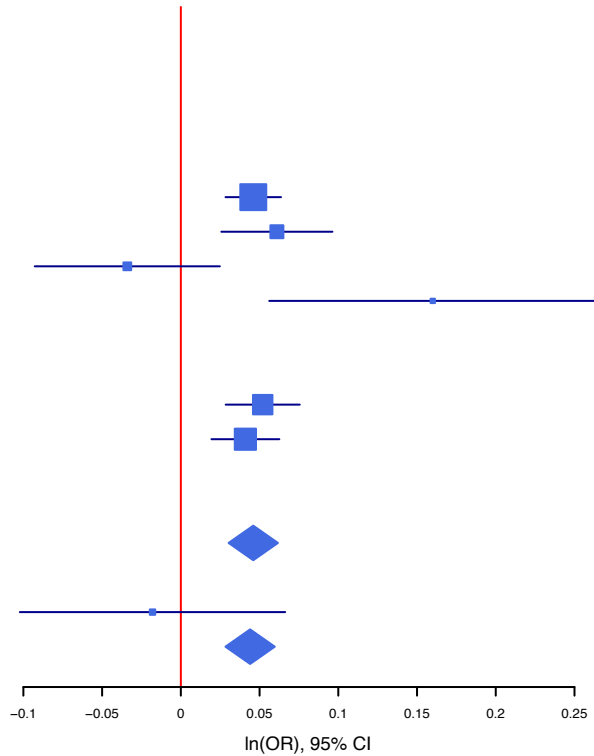

|                                                    | A/G      |             | 6:111822689     |                     | het_P:              | 0.759        | het_I:      | 0.0 |
|----------------------------------------------------|----------|-------------|-----------------|---------------------|---------------------|--------------|-------------|-----|
|                                                    | ngt      | info        | p_value         | f_ca(n)             |                     |              |             |     |
|                                                    | +++      |             |                 |                     |                     |              |             |     |
| PGC_SCZ wave3 eur only                             | 0        | 1.00        | 8.9e-08         | 0.219(53386)        | 0.205(77258)        | 0.056        | 0.01        |     |
| PGC_SCZ afram only                                 | -        | 0.97        | 0.608           | -(6152)             | 0.121(3918)         | 0.023        | 0.046       |     |
| PGC_SCZ latino only                                | -        | 0.99        | 0.296           | -(1234)             | 0.162(3090)         | 0.069        | 0.066       |     |
| PGC_SCZ wave2 only                                 | 0        | 1.00        | 5.66e-06        | 0.216(34850)        | 0.204(44347)        | 0.062        | 0.014       |     |
| PGC_SCZ wave3 (excl. wave2)                        | 0        | 0.98        | 0.00185         | 0.175(39926)        | 0.176(56676)        | 0.047        | 0.015       |     |
| <b>PGC_SCZ wave3 (incl. wave2)</b>                 | <b>0</b> | <b>0.99</b> | <b>4.4e-08</b>  | <b>0.196(74776)</b> | <b>0.19(101023)</b> | <b>0.055</b> | <b>0.01</b> |     |
| Decode – Replication                               | -        | 1.00        | 0.313           | 0.233(1979)         | 0.226(142627)       | 0.045        | 0.045       |     |
| <b>PGC_SCZ wave3 (incl. wave2 and replication)</b> | <b>0</b> | <b>0.99</b> | <b>2.51e-08</b> | <b>0.197(76755)</b> | <b>0.21(243650)</b> | <b>0.055</b> | <b>0.01</b> |     |

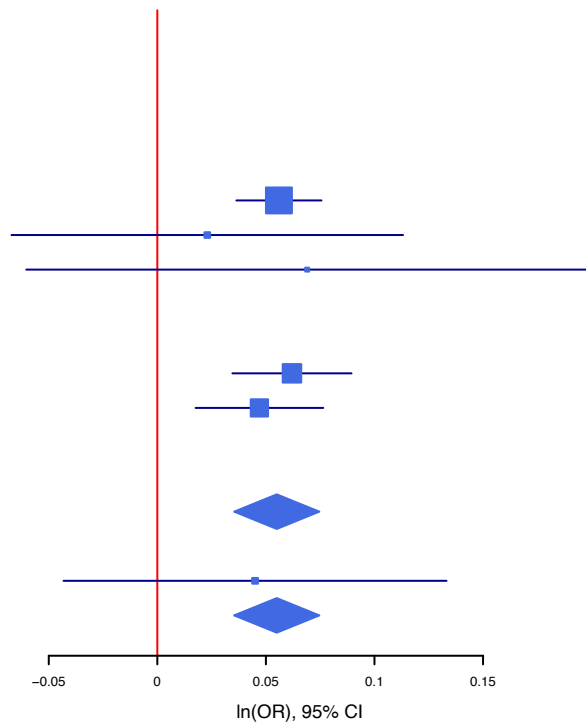

| rs6478858                                          | A/G      |             | 9:131800524     |                    | het_P:               | 0.834        | het_I:       | 0.0 |
|----------------------------------------------------|----------|-------------|-----------------|--------------------|----------------------|--------------|--------------|-----|
|                                                    | ++-      |             |                 |                    |                      |              |              |     |
|                                                    | ngt      | info        | p_value         | f_ca(n)            | f_co(n)              | ln(OR)       | STDerr       |     |
| PGC_SCZ wave3 eur only                             | 1        | 0.89        | 3.84e-07        | 0.068(53386)       | 0.063(77258)         | 0.093        | 0.018        |     |
| PGC_SCZ wave3 asn only                             | 0        | 0.45        | 0.291           | 0.034(14004)       | 0.034(16757)         | 0.073        | 0.069        |     |
| PGC_SCZ afram only                                 | -        | 0.88        | 0.534           | -(6152)            | 0.012(3918)          | 0.088        | 0.142        |     |
| PGC_SCZ latino only                                | -        | 0.92        | 0.952           | -(1234)            | 0.023(3090)          | -0.01        | 0.169        |     |
| PGC_SCZ wave2 only                                 | 1        | 0.87        | 0.000261        | 0.066(34850)       | 0.063(44347)         | 0.086        | 0.024        |     |
| PGC_SCZ wave3 (excl. wave2)                        | 0        | 0.80        | 0.000227        | 0.04(39926)        | 0.043(56676)         | 0.097        | 0.026        |     |
| <b>PGC_SCZ wave3 (incl. wave2)</b>                 | <b>1</b> | <b>0.83</b> | <b>2.33e-07</b> | <b>0.05(74776)</b> | <b>0.051(101023)</b> | <b>0.091</b> | <b>0.018</b> |     |
| Decode – Replication                               | -        | 1.00        | 0.0154          | 0.048(1979)        | 0.051(142627)        | 0.187        | 0.077        |     |
| <b>PGC_SCZ wave3 (incl. wave2 and replication)</b> | <b>1</b> | <b>0.92</b> | <b>2.57e-08</b> | <b>0.05(76755)</b> | <b>0.051(243650)</b> | <b>0.096</b> | <b>0.017</b> |     |

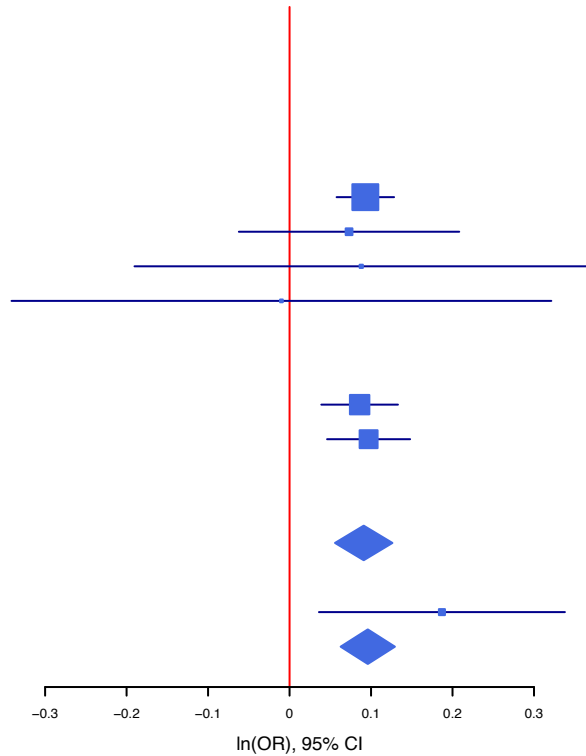

**rs7648272**                      **G/C**                      **3:176791626**  
 ++-                      het\_P:                      0.261    het\_I:                      25.6

|                        | ngt | info | p_value  | f_ca(n)      | f_co(n)      | ln(OR) | STDerr |
|------------------------|-----|------|----------|--------------|--------------|--------|--------|
| PGC_SCZ wave3 eur only | 0   | 1.00 | 1.2e-05  | 0.777(53386) | 0.782(77258) | -0.045 | 0.01   |
| PGC_SCZ wave3 asn only | 0   | 0.95 | 0.000113 | 0.482(14004) | 0.493(16757) | -0.068 | 0.018  |
| PGC_SCZ afram only     | -   | 0.96 | 0.238    | -(6152)      | 0.717(3918)  | -0.039 | 0.033  |
| PGC_SCZ latino only    | -   | 1.00 | 0.456    | -(1234)      | 0.747(3090)  | 0.043  | 0.058  |

|                             |   |      |          |              |              |        |       |
|-----------------------------|---|------|----------|--------------|--------------|--------|-------|
| PGC_SCZ wave2 only          | 0 | 1.01 | 0.000292 | 0.757(34850) | 0.774(44347) | -0.047 | 0.013 |
| PGC_SCZ wave3 (excl. wave2) | 0 | 0.97 | 1.29e-05 | 0.695(39926) | 0.704(56676) | -0.049 | 0.011 |

**PGC\_SCZ wave3 (incl. wave2)**                      **0**    **0.99**    **1.37e-08**    **0.72(74776)**    **0.73(101023)**    **-0.048**    **0.008**

Decode – Replication                      -    1.00    0.911    0.789(1979)    0.798(142627)    0.005    0.045

**PGC\_SCZ wave3 (incl. wave2 and replication)**                      **0**    **0.99**    **2.64e-08**    **0.722(76755)**    **0.768(243650)**    **-0.047**    **0.008**

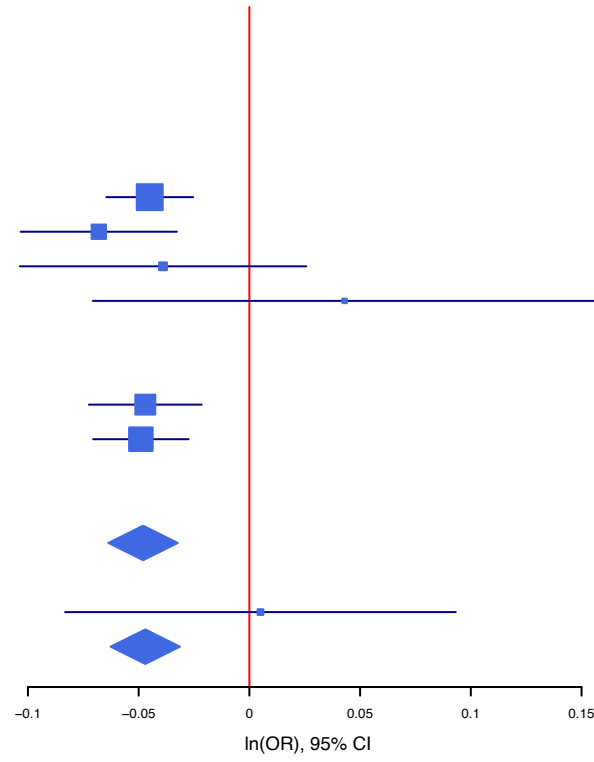





**rs9470670**                      **T/G**                      **6:11988081**  
 ---+                      het\_P:                      0.327    het\_I:                      10.6

|                                                    | ngt      | info        | p_value         | f_ca(n)             | f_co(n)              | ln(OR)        | STDerr      |
|----------------------------------------------------|----------|-------------|-----------------|---------------------|----------------------|---------------|-------------|
| PGC_SCZ wave3 eur only                             | 2        | 1.00        | 5.07e-08        | 0.821(53386)        | 0.83(77258)          | -0.062        | 0.011       |
| PGC_SCZ wave3 asn only                             | 1        | 0.99        | 0.556           | 0.902(14004)        | 0.904(16757)         | -0.017        | 0.029       |
| PGC_SCZ afram only                                 | -        | 1.00        | 0.0185          | -(6152)             | 0.755(3918)          | -0.08         | 0.034       |
| PGC_SCZ latino only                                | -        | 0.97        | 0.738           | -(1234)             | 0.731(3090)          | 0.019         | 0.057       |
| PGC_SCZ wave2 only                                 | 2        | 1.00        | 0.00823         | 0.827(34850)        | 0.831(44347)         | -0.038        | 0.014       |
| PGC_SCZ wave3 (excl. wave2)                        | 1        | 0.99        | 1.8e-07         | 0.807(39926)        | 0.82(56676)          | -0.071        | 0.014       |
| <b>PGC_SCZ wave3 (incl. wave2)</b>                 | <b>3</b> | <b>0.99</b> | <b>1.91e-08</b> | <b>0.815(74776)</b> | <b>0.825(101023)</b> | <b>-0.056</b> | <b>0.01</b> |
| Decode – Replication                               | -        | 1.00        | 0.81            | 0.809(1979)         | 0.816(142627)        | -0.012        | 0.05        |
| <b>PGC_SCZ wave3 (incl. wave2 and replication)</b> | <b>3</b> | <b>1.00</b> | <b>2.74e-08</b> | <b>0.815(76755)</b> | <b>0.82(243650)</b>  | <b>-0.054</b> | <b>0.01</b> |

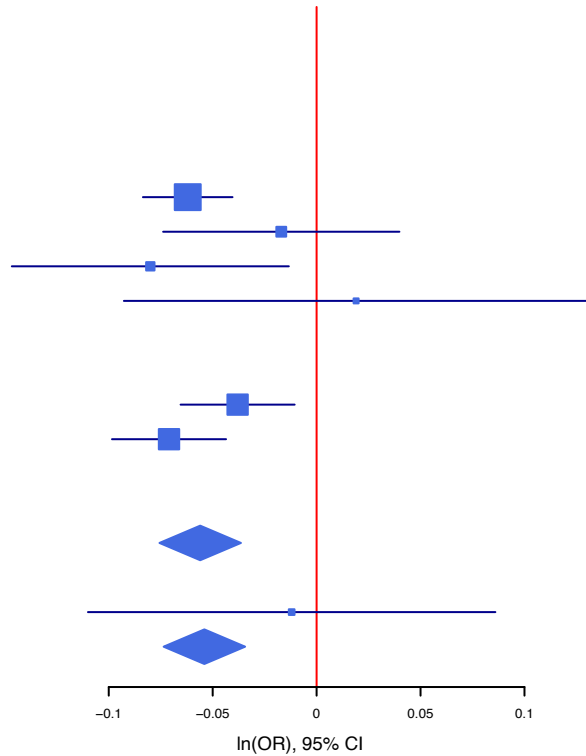

rs117178087

C/T  
---  
6:96464060  
het\_P: 0.827 het\_I: 0.0

|                                                    | ngt      | info        | p_value         | f_ca(n)             | f_co(n)              | ln(OR)       | STDerr       |
|----------------------------------------------------|----------|-------------|-----------------|---------------------|----------------------|--------------|--------------|
| PGC_SCZ wave3 eur only                             | 0        | 0.99        | 4.89e-08        | 0.939(53386)        | 0.933(77258)         | 0.096        | 0.018        |
| PGC_SCZ afram only                                 | -        | 0.88        | 0.395           | -(6152)             | 0.984(3918)          | 0.106        | 0.124        |
| PGC_SCZ latino only                                | -        | 0.98        | 0.485           | -(1234)             | 0.854(3090)          | 0.051        | 0.073        |
| PGC_SCZ wave2 only                                 | 0        | 0.99        | 9.91e-08        | 0.939(34850)        | 0.932(44347)         | 0.121        | 0.023        |
| PGC_SCZ wave3 (excl. wave2)                        | 0        | 0.97        | 0.0199          | 0.929(39926)        | 0.93(56676)          | 0.06         | 0.026        |
| <b>PGC_SCZ wave3 (incl. wave2)</b>                 | <b>0</b> | <b>0.98</b> | <b>3.35e-08</b> | <b>0.934(74776)</b> | <b>0.931(101023)</b> | <b>0.094</b> | <b>0.017</b> |
| Decode – Replication                               | -        | 1.00        | 0.504           | 0.931(1979)         | 0.94(142627)         | 0.054        | 0.081        |
| <b>PGC_SCZ wave3 (incl. wave2 and replication)</b> | <b>0</b> | <b>0.99</b> | <b>2.78e-08</b> | <b>0.934(76755)</b> | <b>0.936(243650)</b> | <b>0.092</b> | <b>0.017</b> |

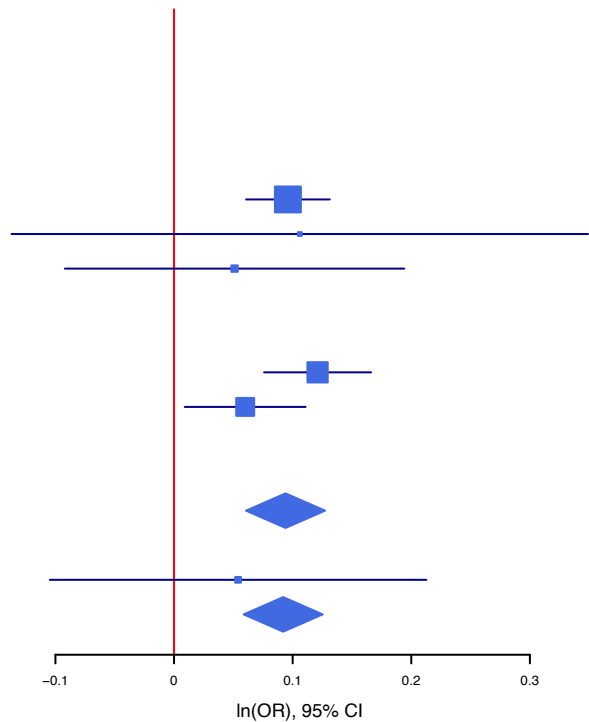

| rs2812599                                          | A/C       |             | 10:34040293     |                     | het_P:               | 0.848        | het_I:       | 0.0 |
|----------------------------------------------------|-----------|-------------|-----------------|---------------------|----------------------|--------------|--------------|-----|
|                                                    | ngt       | info        | p_value         | f_ca(n)             |                      |              |              |     |
| PGC_SCZ wave3 eur only                             | 29        | 1.00        | 3.8e-05         | 0.894(53386)        | 0.887(77258)         | 0.057        | 0.014        |     |
| PGC_SCZ wave3 asn only                             | 5         | 0.99        | 0.00737         | 0.842(14004)        | 0.835(16757)         | 0.062        | 0.023        |     |
| PGC_SCZ afram only                                 | -         | 0.94        | 0.0895          | -(6152)             | 0.776(3918)          | 0.061        | 0.036        |     |
| PGC_SCZ latino only                                | -         | 0.95        | 0.262           | -(1234)             | 0.939(3090)          | 0.12         | 0.107        |     |
| PGC_SCZ wave2 only                                 | 28        | 1.00        | 0.000207        | 0.892(34850)        | 0.888(44347)         | 0.064        | 0.017        |     |
| PGC_SCZ wave3 (excl. wave2)                        | 6         | 0.98        | 0.000156        | 0.867(39926)        | 0.865(56676)         | 0.056        | 0.015        |     |
| <b>PGC_SCZ wave3 (incl. wave2)</b>                 | <b>34</b> | <b>0.99</b> | <b>1.33e-07</b> | <b>0.877(74776)</b> | <b>0.874(101023)</b> | <b>0.059</b> | <b>0.011</b> |     |
| Decode – Replication                               | -         | 1.00        | 0.0564          | 0.885(1979)         | 0.893(142627)        | 0.115        | 0.06         |     |
| <b>PGC_SCZ wave3 (incl. wave2 and replication)</b> | <b>34</b> | <b>0.99</b> | <b>2.79e-08</b> | <b>0.877(76755)</b> | <b>0.885(243650)</b> | <b>0.061</b> | <b>0.011</b> |     |

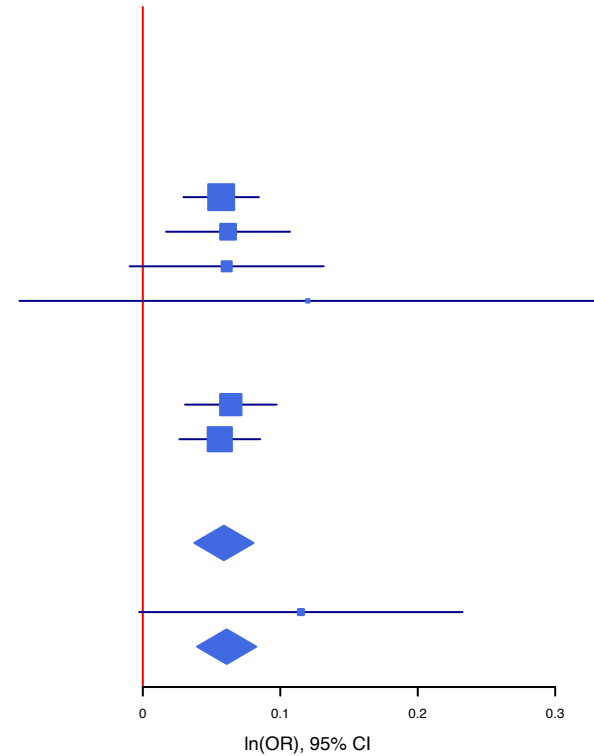

rs221618

G/A  
--- het\_P: 0.61 het\_I: 0.0

|                                                    | ngt       | info        | p_value         | f_ca(n)             | f_co(n)              | ln(OR)       | STDerr       |
|----------------------------------------------------|-----------|-------------|-----------------|---------------------|----------------------|--------------|--------------|
| PGC_SCZ wave3 eur only                             | 23        | 0.98        | 4.76e-06        | 0.444(53386)        | 0.435(77258)         | 0.04         | 0.009        |
| PGC_SCZ wave3 asn only                             | 4         | 0.93        | 0.00301         | 0.322(14004)        | 0.316(16757)         | 0.056        | 0.019        |
| PGC_SCZ afram only                                 | -         | 0.96        | 0.791           | -(6152)             | 0.79(3918)           | 0.01         | 0.038        |
| PGC_SCZ latino only                                | -         | 0.97        | 0.2             | -(1234)             | 0.38(3090)           | 0.07         | 0.055        |
| PGC_SCZ wave2 only                                 | 0         | 0.97        | 1.31e-05        | 0.44(34850)         | 0.432(44347)         | 0.048        | 0.011        |
| PGC_SCZ wave3 (excl. wave2)                        | 27        | 0.96        | 0.000696        | 0.471(39926)        | 0.454(56676)         | 0.036        | 0.011        |
| <b>PGC_SCZ wave3 (incl. wave2)</b>                 | <b>27</b> | <b>0.97</b> | <b>5.26e-08</b> | <b>0.458(74776)</b> | <b>0.446(101023)</b> | <b>0.042</b> | <b>0.008</b> |
| Decode – Replication                               | -         | 1.00        | 0.363           | 0.434(1979)         | 0.445(142627)        | 0.034        | 0.038        |
| <b>PGC_SCZ wave3 (incl. wave2 and replication)</b> | <b>27</b> | <b>0.98</b> | <b>2.83e-08</b> | <b>0.457(76755)</b> | <b>0.445(243650)</b> | <b>0.042</b> | <b>0.008</b> |

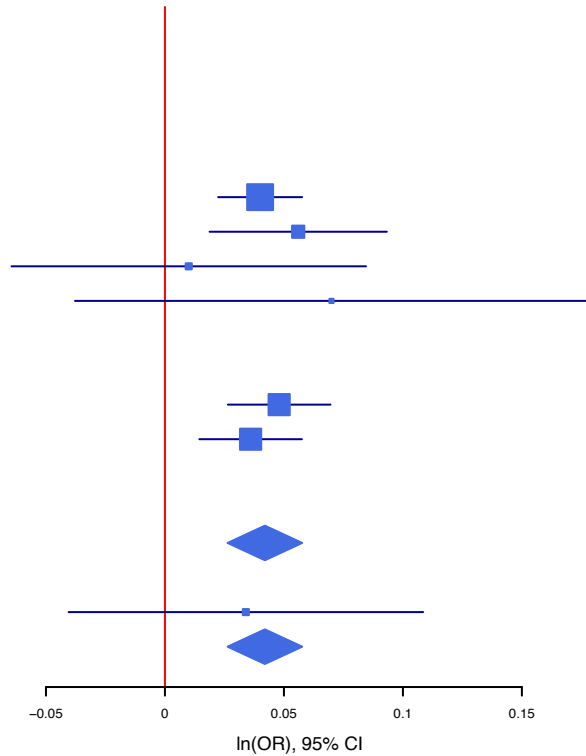

|                                                    | A/G       |             | 8:9744650       |                     | het_P:               | 0.312        | het_I:       | 14.3 |
|----------------------------------------------------|-----------|-------------|-----------------|---------------------|----------------------|--------------|--------------|------|
|                                                    | ngt       | info        | p_value         | f_ca(n)             |                      |              |              |      |
| PGC_SCZ wave3 eur only                             | 66        | 1.00        | 2.87e-05        | 0.245(53386)        | 0.239(77258)         | 0.042        | 0.01         |      |
| PGC_SCZ wave3 asn only                             | 9         | 1.00        | 0.00178         | 0.349(14004)        | 0.335(16757)         | 0.056        | 0.018        |      |
| PGC_SCZ afram only                                 | -         | 0.96        | 0.0628          | -(6152)             | 0.223(3918)          | 0.067        | 0.036        |      |
| PGC_SCZ latino only                                | -         | 0.98        | 0.027           | -(1234)             | 0.224(3090)          | 0.131        | 0.059        |      |
| PGC_SCZ wave2 only                                 | 29        | 1.00        | 2.25e-05        | 0.254(34850)        | 0.243(44347)         | 0.053        | 0.013        |      |
| PGC_SCZ wave3 (excl. wave2)                        | 46        | 0.99        | 9.9e-05         | 0.257(39926)        | 0.255(56676)         | 0.044        | 0.011        |      |
| <b>PGC_SCZ wave3 (incl. wave2)</b>                 | <b>75</b> | <b>0.99</b> | <b>1.19e-08</b> | <b>0.256(74776)</b> | <b>0.251(101023)</b> | <b>0.048</b> | <b>0.008</b> |      |
| Decode – Replication                               | -         | 1.00        | 0.888           | 0.223(1979)         | 0.222(142627)        | -0.007       | 0.046        |      |
| <b>PGC_SCZ wave3 (incl. wave2 and replication)</b> | <b>75</b> | <b>1.00</b> | <b>2.85e-08</b> | <b>0.255(76755)</b> | <b>0.235(243650)</b> | <b>0.046</b> | <b>0.008</b> |      |

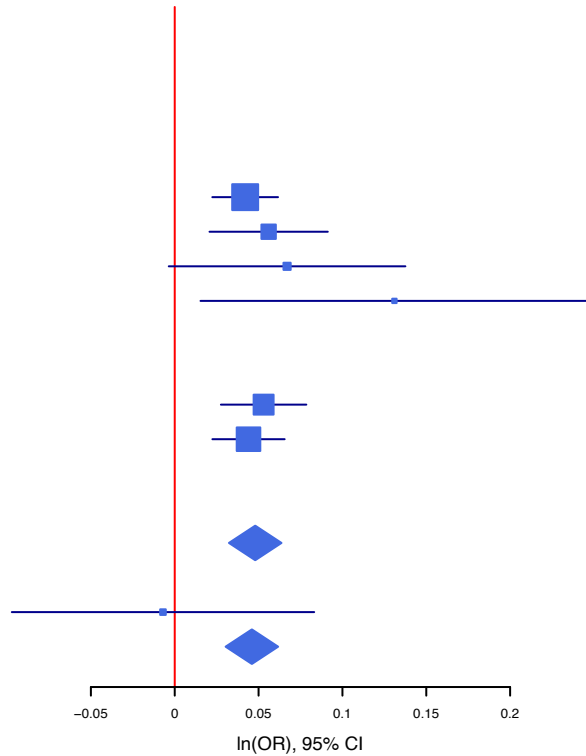

**rs62479287**                      **G/A**                      **7:125889663**  
 +-+                      het\_P:                      0.781    het\_I:                      0.0

|                                                    | ngt      | info        | p_value         | f_ca(n)             | f_co(n)              | ln(OR)        | STDerr       |
|----------------------------------------------------|----------|-------------|-----------------|---------------------|----------------------|---------------|--------------|
| PGC_SCZ wave3 eur only                             | 1        | 0.99        | 6.27e-06        | 0.739(53386)        | 0.745(77258)         | -0.044        | 0.01         |
| PGC_SCZ wave3 asn only                             | 0        | 0.99        | 0.0164          | 0.752(14004)        | 0.759(16757)         | -0.047        | 0.02         |
| PGC_SCZ afram only                                 | -        | 0.97        | 0.219           | -(6152)             | 0.859(3918)          | -0.053        | 0.043        |
| PGC_SCZ latino only                                | -        | 1.01        | 0.992           | -(1234)             | 0.842(3090)          | 0.001         | 0.067        |
| PGC_SCZ wave2 only                                 | 1        | 0.99        | 0.00277         | 0.742(34850)        | 0.747(44347)         | -0.037        | 0.012        |
| PGC_SCZ wave3 (excl. wave2)                        | 0        | 0.99        | 1.38e-05        | 0.784(39926)        | 0.779(56676)         | -0.051        | 0.012        |
| <b>PGC_SCZ wave3 (incl. wave2)</b>                 | <b>1</b> | <b>0.99</b> | <b>1.76e-07</b> | <b>0.767(74776)</b> | <b>0.767(101023)</b> | <b>-0.045</b> | <b>0.008</b> |
| Decode – Replication                               | -        | 1.00        | 0.0465          | 0.733(1979)         | 0.732(142627)        | -0.085        | 0.043        |
| <b>PGC_SCZ wave3 (incl. wave2 and replication)</b> | <b>1</b> | <b>1.00</b> | <b>2.91e-08</b> | <b>0.766(76755)</b> | <b>0.747(243650)</b> | <b>-0.046</b> | <b>0.008</b> |

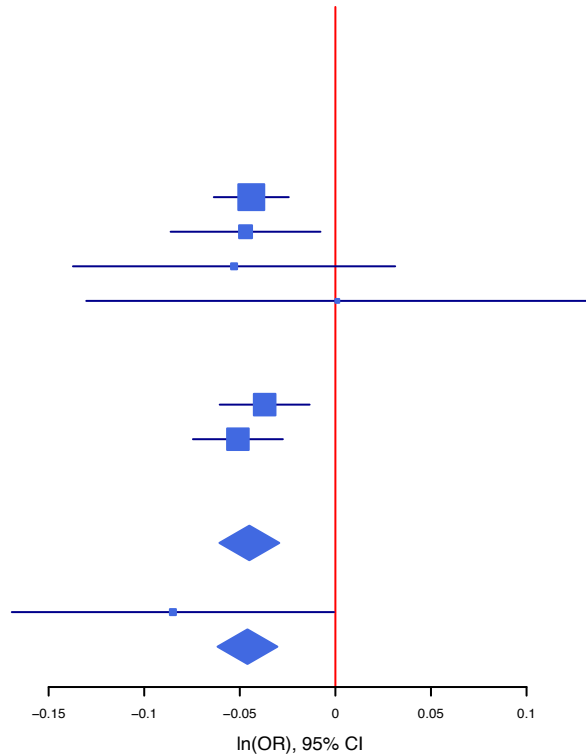

rs12224032

C/G 11:112914680  
--+ het\_P: 0.23 het\_I: 31.9

|                                                    | ngt      | info        | p_value         | f_ca(n)             | f_co(n)              | ln(OR)        | STDerr       |
|----------------------------------------------------|----------|-------------|-----------------|---------------------|----------------------|---------------|--------------|
| PGC_SCZ wave3 eur only                             | 1        | 0.99        | 7.58e-07        | 0.798(53386)        | 0.804(77258)         | -0.053        | 0.011        |
| PGC_SCZ wave3 asn only                             | 0        | 0.96        | 0.169           | 0.577(14004)        | 0.578(16757)         | -0.024        | 0.018        |
| PGC_SCZ afram only                                 | -        | 0.96        | 0.00832         | -(6152)             | 0.832(3918)          | -0.106        | 0.04         |
| PGC_SCZ latino only                                | -        | 1.00        | 0.841           | -(1234)             | 0.85(3090)           | 0.014         | 0.07         |
| PGC_SCZ wave2 only                                 | 1        | 0.99        | 0.000256        | 0.782(34850)        | 0.795(44347)         | -0.049        | 0.013        |
| PGC_SCZ wave3 (excl. wave2)                        | 0        | 0.98        | 0.000103        | 0.768(39926)        | 0.768(56676)         | -0.046        | 0.012        |
| <b>PGC_SCZ wave3 (incl. wave2)</b>                 | <b>1</b> | <b>0.99</b> | <b>9.23e-08</b> | <b>0.774(74776)</b> | <b>0.778(101023)</b> | <b>-0.048</b> | <b>0.009</b> |
| Decode – Replication                               | -        | 1.00        | 0.104           | 0.802(1979)         | 0.796(142627)        | -0.077        | 0.047        |
| <b>PGC_SCZ wave3 (incl. wave2 and replication)</b> | <b>1</b> | <b>0.99</b> | <b>2.92e-08</b> | <b>0.775(76755)</b> | <b>0.788(243650)</b> | <b>-0.048</b> | <b>0.009</b> |

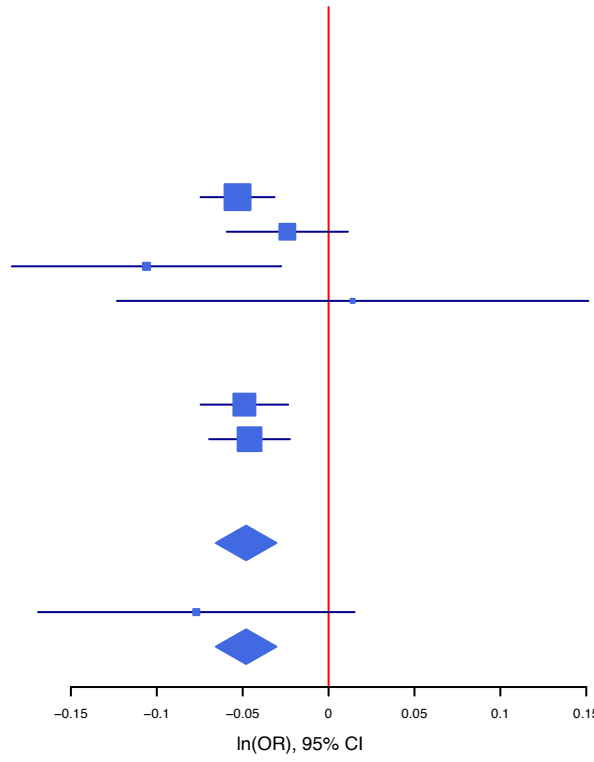

| rs244908                                           | C/G      |             | 16:58665389     |                     |                      |              |              |
|----------------------------------------------------|----------|-------------|-----------------|---------------------|----------------------|--------------|--------------|
|                                                    | +++      | het_P:      | 0.694           | het_I:              | 0.0                  |              |              |
|                                                    | ngt      | info        | p_value         | f_ca(n)             | f_co(n)              | ln(OR)       | STDerr       |
| PGC_SCZ wave3 eur only                             | 0        | 0.99        | 3.57e-08        | 0.571(53386)        | 0.556(77258)         | 0.048        | 0.009        |
| PGC_SCZ wave3 asn only                             | 0        | 0.93        | 0.935           | 0.948(14004)        | 0.949(16757)         | 0.003        | 0.042        |
| PGC_SCZ afram only                                 | -        | 0.95        | 0.443           | -(6152)             | 0.812(3918)          | 0.03         | 0.039        |
| PGC_SCZ latino only                                | -        | 1.01        | 0.122           | -(1234)             | 0.746(3090)          | 0.089        | 0.058        |
| PGC_SCZ wave2 only                                 | 0        | 0.99        | 3.21e-06        | 0.594(34850)        | 0.568(44347)         | 0.052        | 0.011        |
| PGC_SCZ wave3 (excl. wave2)                        | 0        | 0.97        | 0.00127         | 0.736(39926)        | 0.709(56676)         | 0.039        | 0.012        |
| <b>PGC_SCZ wave3 (incl. wave2)</b>                 | <b>0</b> | <b>0.98</b> | <b>1.83e-08</b> | <b>0.68(74776)</b>  | <b>0.654(101023)</b> | <b>0.046</b> | <b>0.008</b> |
| Decode – Replication                               | -        | 1.00        | 0.871           | 0.581(1979)         | 0.574(142627)        | 0.006        | 0.038        |
| <b>PGC_SCZ wave3 (incl. wave2 and replication)</b> | <b>0</b> | <b>0.99</b> | <b>3.01e-08</b> | <b>0.678(76755)</b> | <b>0.61(243650)</b>  | <b>0.044</b> | <b>0.008</b> |

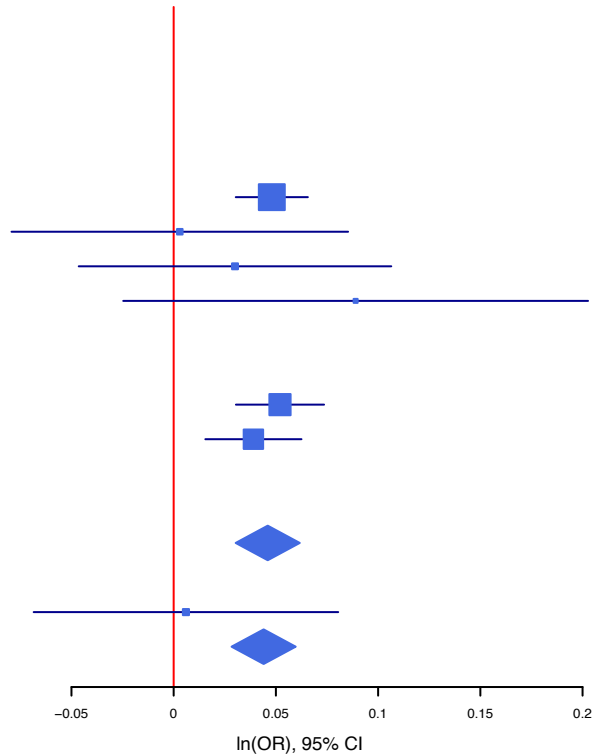



rs345906                    T/C                    2:8689731  
 ---                    het\_P:                    0.19    het\_I:                    39.7

|                                                    | ngt      | info        | p_value         | f_ca(n)             | f_co(n)              | ln(OR)        | STDerr       |
|----------------------------------------------------|----------|-------------|-----------------|---------------------|----------------------|---------------|--------------|
| PGC_SCZ wave3 eur only                             | 0        | 0.93        | 3.76e-05        | 0.653(53386)        | 0.661(77258)         | -0.039        | 0.009        |
| PGC_SCZ wave3 asn only                             | 0        | 0.91        | 0.000619        | 0.386(14004)        | 0.393(16757)         | -0.063        | 0.018        |
| PGC_SCZ afram only                                 | -        | 0.98        | 0.573           | -(6152)             | 0.294(3918)          | -0.018        | 0.033        |
| PGC_SCZ latino only                                | -        | 0.99        | 0.0119          | -(1234)             | 0.439(3090)          | -0.127        | 0.051        |
| PGC_SCZ wave2 only                                 | 0        | 0.93        | 0.00766         | 0.64(34850)         | 0.655(44347)         | -0.032        | 0.012        |
| PGC_SCZ wave3 (excl. wave2)                        | 0        | 0.94        | 4.05e-07        | 0.479(39926)        | 0.513(56676)         | -0.055        | 0.011        |
| <b>PGC_SCZ wave3 (incl. wave2)</b>                 | <b>0</b> | <b>0.94</b> | <b>3.54e-08</b> | <b>0.542(74776)</b> | <b>0.567(101023)</b> | <b>-0.044</b> | <b>0.008</b> |
| Decode – Replication                               | -        | 1.00        | 0.577           | 0.647(1979)         | 0.641(142627)        | -0.022        | 0.04         |
| <b>PGC_SCZ wave3 (incl. wave2 and replication)</b> | <b>0</b> | <b>0.97</b> | <b>3.06e-08</b> | <b>0.544(76755)</b> | <b>0.608(243650)</b> | <b>-0.043</b> | <b>0.008</b> |

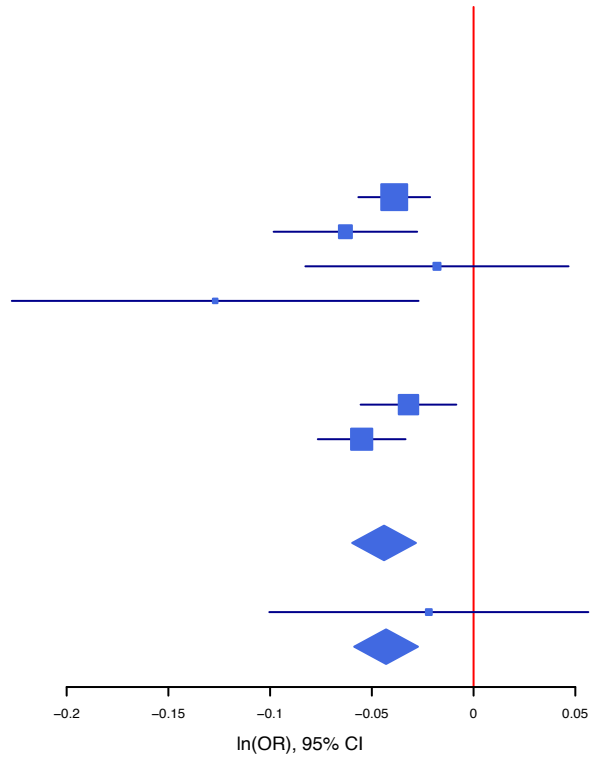

| rs7811528                                          | A/G      |             | 7:2702816       |                     | het_P:               | 0.968         | het_I:      | 0.0 |
|----------------------------------------------------|----------|-------------|-----------------|---------------------|----------------------|---------------|-------------|-----|
|                                                    | ngt      | info        | p_value         | f_ca(n)             |                      |               |             |     |
| PGC_SCZ wave3 eur only                             | 0        | 0.98        | 1.15e-06        | 0.838(53386)        | 0.847(77258)         | -0.058        | 0.012       |     |
| PGC_SCZ wave3 asn only                             | 0        | 0.93        | 0.0224          | 0.921(14004)        | 0.927(16757)         | -0.076        | 0.033       |     |
| PGC_SCZ afram only                                 | -        | 0.94        | 0.0857          | -(6152)             | 0.662(3918)          | -0.055        | 0.032       |     |
| PGC_SCZ latino only                                | -        | 0.93        | 0.5             | -(1234)             | 0.818(3090)          | -0.045        | 0.067       |     |
| PGC_SCZ wave2 only                                 | 0        | 0.96        | 0.000275        | 0.844(34850)        | 0.849(44347)         | -0.056        | 0.015       |     |
| PGC_SCZ wave3 (excl. wave2)                        | 0        | 0.96        | 1.43e-05        | 0.817(39926)        | 0.832(56676)         | -0.062        | 0.014       |     |
| <b>PGC_SCZ wave3 (incl. wave2)</b>                 | <b>0</b> | <b>0.96</b> | <b>1.5e-08</b>  | <b>0.827(74776)</b> | <b>0.839(101023)</b> | <b>-0.059</b> | <b>0.01</b> |     |
| Decode – Replication                               | -        | 1.00        | 0.82            | 0.846(1979)         | 0.859(142627)        | 0.012         | 0.054       |     |
| <b>PGC_SCZ wave3 (incl. wave2 and replication)</b> | <b>0</b> | <b>0.98</b> | <b>3.08e-08</b> | <b>0.827(76755)</b> | <b>0.85(243650)</b>  | <b>-0.056</b> | <b>0.01</b> |     |

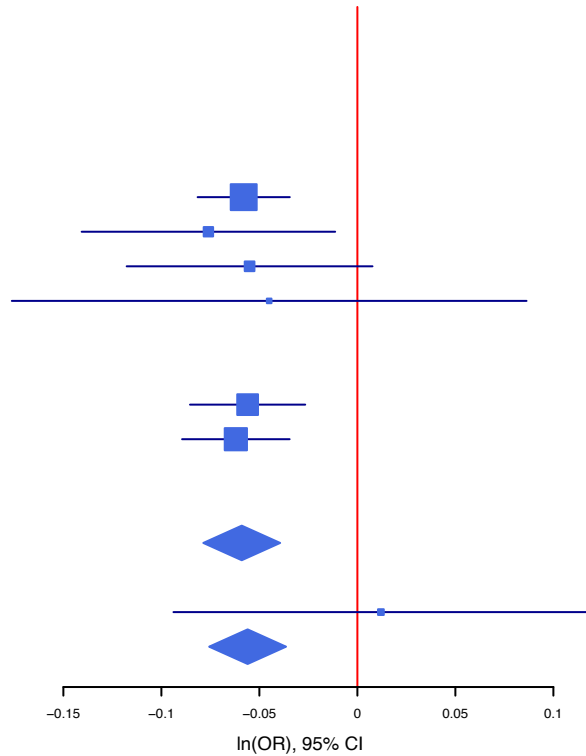

rs11129383

G/A  
+--+                    3:30106169  
                          het\_P:        0.067    het\_I:    63.1

|                                                    | ngt      | info        | p_value         | f_ca(n)             | f_co(n)             | ln(OR)        | STDerr       |
|----------------------------------------------------|----------|-------------|-----------------|---------------------|---------------------|---------------|--------------|
| PGC_SCZ wave3 eur only                             | 0        | 0.97        | 2.97e-07        | 0.725(53386)        | 0.734(77258)        | -0.05         | 0.01         |
| PGC_SCZ wave3 asn only                             | 0        | 0.92        | 0.0529          | 0.635(14004)        | 0.646(16757)        | -0.036        | 0.018        |
| PGC_SCZ afram only                                 | -        | 0.94        | 0.703           | -(6152)             | 0.703(3918)         | 0.013         | 0.033        |
| PGC_SCZ latino only                                | -        | 1.00        | 0.0182          | -(1234)             | 0.634(3090)         | -0.126        | 0.054        |
| PGC_SCZ wave2 only                                 | 0        | 0.98        | 3.89e-05        | 0.719(34850)        | 0.732(44347)        | -0.05         | 0.012        |
| PGC_SCZ wave3 (excl. wave2)                        | 0        | 0.96        | 0.000274        | 0.683(39926)        | 0.695(56676)        | -0.041        | 0.011        |
| <b>PGC_SCZ wave3 (incl. wave2)</b>                 | <b>0</b> | <b>0.96</b> | <b>3.98e-08</b> | <b>0.697(74776)</b> | <b>0.71(101023)</b> | <b>-0.045</b> | <b>0.008</b> |
| Decode - Replication                               | -        | 1.00        | 0.504           | 0.724(1979)         | 0.71(142627)        | -0.028        | 0.042        |
| <b>PGC_SCZ wave3 (incl. wave2 and replication)</b> | <b>0</b> | <b>0.98</b> | <b>3.08e-08</b> | <b>0.698(76755)</b> | <b>0.71(243650)</b> | <b>-0.044</b> | <b>0.008</b> |

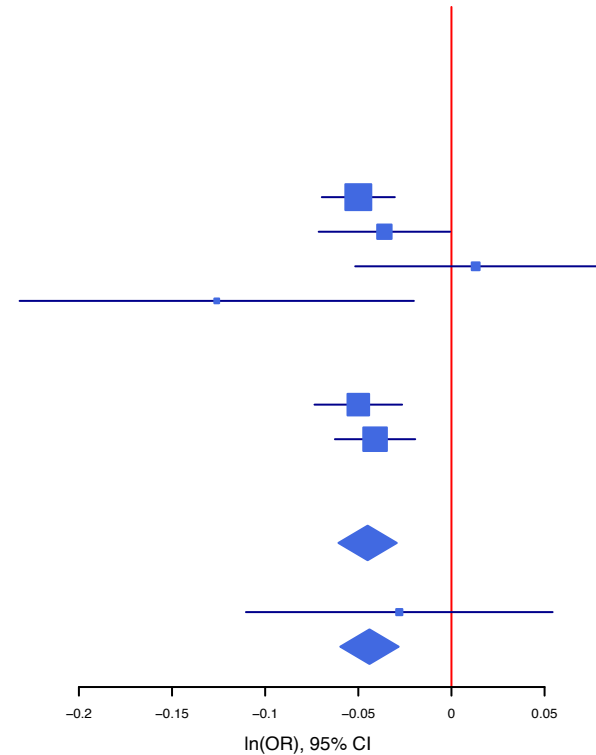

rs3909258 C/G 17:19945819  
 --- het\_P: 0.574 het\_I: 0.0

|                                                    | ngt      | info        | p_value         | f_ca(n)             | f_co(n)              | ln(OR)        | STDerr       |
|----------------------------------------------------|----------|-------------|-----------------|---------------------|----------------------|---------------|--------------|
| PGC_SCZ wave3 eur only                             | 0        | 0.99        | 4.25e-06        | 0.476(53386)        | 0.485(77258)         | -0.04         | 0.009        |
| PGC_SCZ wave3 asn only                             | 0        | 0.95        | 0.00064         | 0.78(14004)         | 0.793(16757)         | -0.074        | 0.022        |
| PGC_SCZ afram only                                 | -        | 0.95        | 0.676           | -(6152)             | 0.486(3918)          | -0.012        | 0.03         |
| PGC_SCZ latino only                                | -        | 0.99        | 0.526           | -(1234)             | 0.515(3090)          | -0.032        | 0.05         |
| PGC_SCZ wave2 only                                 | 0        | 1.00        | 2.39e-05        | 0.495(34850)        | 0.497(44347)         | -0.046        | 0.011        |
| PGC_SCZ wave3 (excl. wave2)                        | 0        | 0.97        | 0.000396        | 0.552(39926)        | 0.555(56676)         | -0.038        | 0.011        |
| <b>PGC_SCZ wave3 (incl. wave2)</b>                 | <b>0</b> | <b>0.98</b> | <b>3.51e-08</b> | <b>0.53(74776)</b>  | <b>0.533(101023)</b> | <b>-0.042</b> | <b>0.008</b> |
| Decode – Replication                               | -        | 1.00        | 0.638           | 0.496(1979)         | 0.477(142627)        | -0.02         | 0.042        |
| <b>PGC_SCZ wave3 (incl. wave2 and replication)</b> | <b>0</b> | <b>0.99</b> | <b>3.1e-08</b>  | <b>0.529(76755)</b> | <b>0.502(243650)</b> | <b>-0.041</b> | <b>0.008</b> |

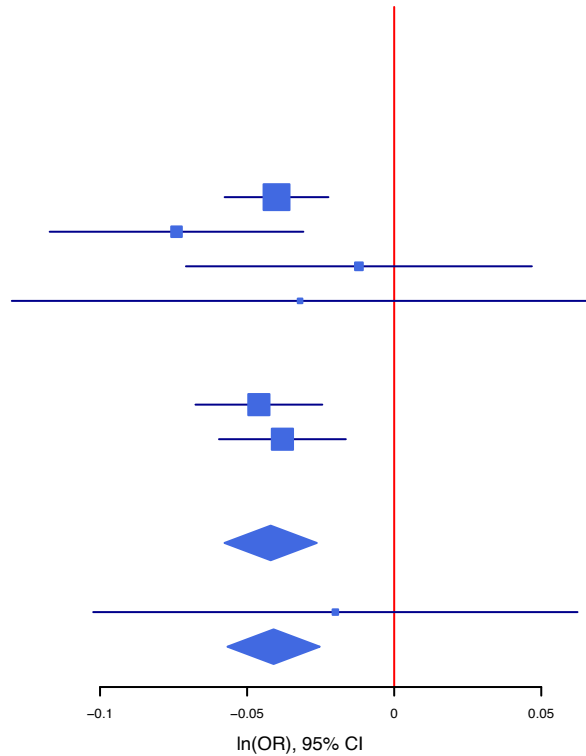

| rs9341835                                          | T/C      |             | 6:64126180      |                     | het_P:               | 0.372         | het_I:       | 0.0 |
|----------------------------------------------------|----------|-------------|-----------------|---------------------|----------------------|---------------|--------------|-----|
|                                                    | ngt      | info        | p_value         | f_ca(n)             |                      |               |              |     |
| PGC_SCZ wave3 eur only                             | 2        | 0.96        | 7.58e-07        | 0.481(53386)        | 0.488(77258)         | -0.044        | 0.009        |     |
| PGC_SCZ wave3 asn only                             | 1        | 0.95        | 0.0675          | 0.46(14004)         | 0.472(16757)         | -0.032        | 0.018        |     |
| PGC_SCZ afram only                                 | -        | 0.92        | 0.864           | -(6152)             | 0.878(3918)          | -0.008        | 0.048        |     |
| PGC_SCZ latino only                                | -        | 1.01        | 0.644           | -(1234)             | 0.619(3090)          | 0.024         | 0.051        |     |
| PGC_SCZ wave2 only                                 | 2        | 0.96        | 4.9e-08         | 0.473(34850)        | 0.483(44347)         | -0.06         | 0.011        |     |
| PGC_SCZ wave3 (excl. wave2)                        | 1        | 0.95        | 0.0735          | 0.586(39926)        | 0.566(56676)         | -0.019        | 0.011        |     |
| <b>PGC_SCZ wave3 (incl. wave2)</b>                 | <b>3</b> | <b>0.96</b> | <b>4.52e-07</b> | <b>0.542(74776)</b> | <b>0.534(101023)</b> | <b>-0.039</b> | <b>0.008</b> |     |
| Decode – Replication                               | -        | 1.00        | 0.00333         | 0.465(1979)         | 0.456(142627)        | -0.112        | 0.038        |     |
| <b>PGC_SCZ wave3 (incl. wave2 and replication)</b> | <b>3</b> | <b>0.98</b> | <b>3.17e-08</b> | <b>0.54(76755)</b>  | <b>0.491(243650)</b> | <b>-0.042</b> | <b>0.008</b> |     |

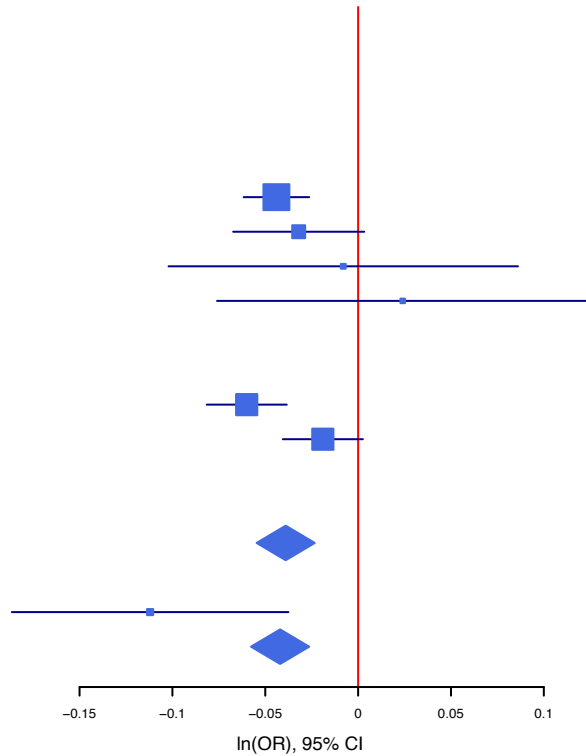

rs35536174 C/T 15:59142215  
 +++ het\_P: 0.881 het\_I: 0.0

|                                                    | ngt      | info        | p_value         | f_ca(n)             | f_co(n)              | ln(OR)        | STDerr       |
|----------------------------------------------------|----------|-------------|-----------------|---------------------|----------------------|---------------|--------------|
| PGC_SCZ wave3 eur only                             | 0        | 0.96        | 2.63e-05        | 0.935(53386)        | 0.941(77258)         | -0.076        | 0.018        |
| PGC_SCZ wave3 asn only                             | 0        | 0.89        | 0.0434          | 0.896(14004)        | 0.899(16757)         | -0.06         | 0.03         |
| PGC_SCZ afram only                                 | -        | 0.94        | 0.361           | -(6152)             | 0.946(3918)          | -0.061        | 0.067        |
| PGC_SCZ latino only                                | -        | 0.96        | 0.115           | -(1234)             | 0.818(3090)          | -0.104        | 0.066        |
| PGC_SCZ wave2 only                                 | 0        | 0.98        | 0.000902        | 0.935(34850)        | 0.942(44347)         | -0.076        | 0.023        |
| PGC_SCZ wave3 (excl. wave2)                        | 0        | 0.93        | 0.000227        | 0.904(39926)        | 0.913(56676)         | -0.071        | 0.019        |
| <b>PGC_SCZ wave3 (incl. wave2)</b>                 | <b>0</b> | <b>0.95</b> | <b>7.11e-07</b> | <b>0.916(74776)</b> | <b>0.924(101023)</b> | <b>-0.073</b> | <b>0.015</b> |
| Decode – Replication                               | -        | 1.00        | 0.00117         | 0.939(1979)         | 0.934(142627)        | -0.225        | 0.069        |
| <b>PGC_SCZ wave3 (incl. wave2 and replication)</b> | <b>0</b> | <b>0.98</b> | <b>3.19e-08</b> | <b>0.917(76755)</b> | <b>0.929(243650)</b> | <b>-0.079</b> | <b>0.014</b> |

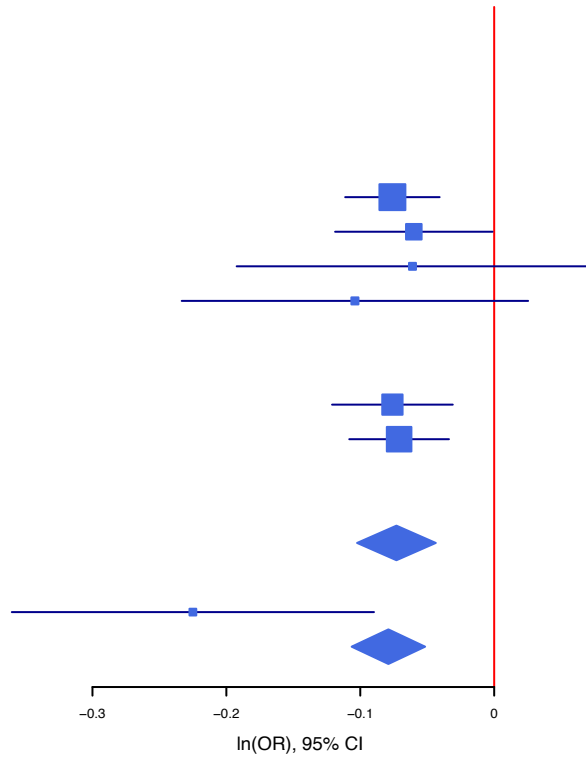

| rs2905625                                          | A/C       |             | 4:105445205     |                     |                      |               |              |
|----------------------------------------------------|-----------|-------------|-----------------|---------------------|----------------------|---------------|--------------|
|                                                    | --+       |             | het_P:          | 0.184               | het_I:               | 40.9          |              |
|                                                    | ngt       | info        | p_value         | f_ca(n)             | f_co(n)              | ln(OR)        | STDerr       |
| PGC_SCZ wave3 eur only                             | 30        | 0.99        | 7.2e-08         | 0.534(53386)        | 0.546(77258)         | -0.047        | 0.009        |
| PGC_SCZ wave3 asn only                             | 6         | 0.91        | 0.248           | 0.411(14004)        | 0.415(16757)         | -0.021        | 0.018        |
| PGC_SCZ afram only                                 | -         | 0.93        | 0.914           | -(6152)             | 0.522(3918)          | -0.003        | 0.03         |
| PGC_SCZ latino only                                | -         | 0.98        | 0.542           | -(1234)             | 0.583(3090)          | 0.031         | 0.051        |
| PGC_SCZ wave2 only                                 | 2         | 0.98        | 2.03e-06        | 0.531(34850)        | 0.549(44347)         | -0.052        | 0.011        |
| PGC_SCZ wave3 (excl. wave2)                        | 34        | 0.96        | 0.0127          | 0.511(39926)        | 0.515(56676)         | -0.026        | 0.01         |
| <b>PGC_SCZ wave3 (incl. wave2)</b>                 | <b>36</b> | <b>0.97</b> | <b>3.95e-07</b> | <b>0.519(74776)</b> | <b>0.528(101023)</b> | <b>-0.038</b> | <b>0.008</b> |
| Decode – Replication                               | -         | 1.00        | 0.00307         | 0.553(1979)         | 0.539(142627)        | -0.113        | 0.038        |
| <b>PGC_SCZ wave3 (incl. wave2 and replication)</b> | <b>36</b> | <b>0.98</b> | <b>3.23e-08</b> | <b>0.52(76755)</b>  | <b>0.534(243650)</b> | <b>-0.041</b> | <b>0.007</b> |

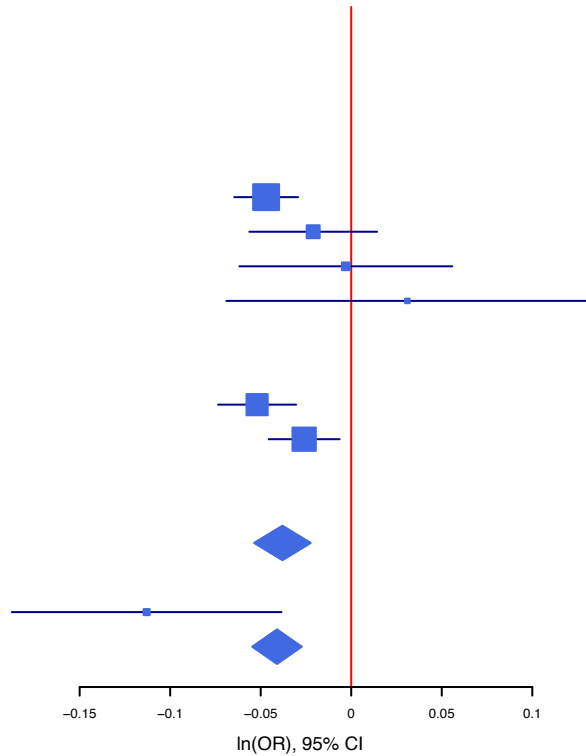

| rs1144403                                          | A/T      |             | 11:104677870    |                     | het_P:               | 0.298        | het_I:       | 17.4 |
|----------------------------------------------------|----------|-------------|-----------------|---------------------|----------------------|--------------|--------------|------|
|                                                    | ngt      | info        | p_value         | f_ca(n)             |                      |              |              |      |
| PGC_SCZ wave3 eur only                             | 0        | 1.00        | 2.26e-06        | 0.471(53386)        | 0.465(77258)         | 0.041        | 0.009        |      |
| PGC_SCZ wave3 asn only                             | 0        | 1.00        | 0.0251          | 0.423(14004)        | 0.413(16757)         | 0.038        | 0.017        |      |
| PGC_SCZ afram only                                 | -        | 1.00        | 0.226           | -(6152)             | 0.803(3918)          | 0.045        | 0.037        |      |
| PGC_SCZ latino only                                | -        | 1.01        | 0.0191          | -(1234)             | 0.644(3090)          | 0.122        | 0.052        |      |
| PGC_SCZ wave2 only                                 | 0        | 1.01        | 4.93e-05        | 0.472(34850)        | 0.467(44347)         | 0.044        | 0.011        |      |
| PGC_SCZ wave3 (excl. wave2)                        | 0        | 1.00        | 8.36e-05        | 0.558(39926)        | 0.529(56676)         | 0.04         | 0.01         |      |
| <b>PGC_SCZ wave3 (incl. wave2)</b>                 | <b>0</b> | <b>1.00</b> | <b>1.61e-08</b> | <b>0.524(74776)</b> | <b>0.506(101023)</b> | <b>0.042</b> | <b>0.008</b> |      |
| Decode – Replication                               | -        | 1.00        | 0.998           | 0.46(1979)          | 0.443(142627)        | -0.0         | 0.038        |      |
| <b>PGC_SCZ wave3 (incl. wave2 and replication)</b> | <b>0</b> | <b>1.00</b> | <b>3.36e-08</b> | <b>0.523(76755)</b> | <b>0.471(243650)</b> | <b>0.041</b> | <b>0.007</b> |      |

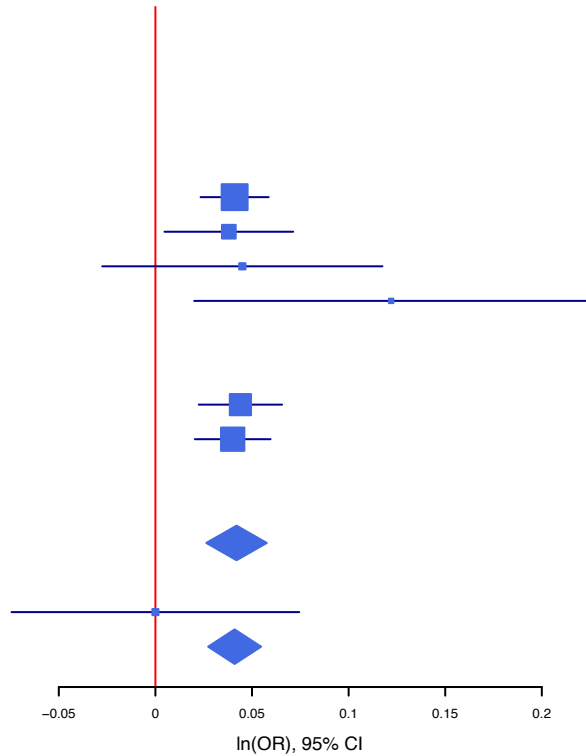



| rs7773962                                          | A/G      |             | 6:130583007     |                     | het_P:               | 0.415        | het_I:       | 0.0 |
|----------------------------------------------------|----------|-------------|-----------------|---------------------|----------------------|--------------|--------------|-----|
|                                                    | ngt      | info        | p_value         | f_ca(n)             |                      |              |              |     |
| PGC_SCZ wave3 eur only                             | 0        | 1.00        | 0.000116        | 0.725(53386)        | 0.719(77258)         | 0.037        | 0.01         |     |
| PGC_SCZ wave3 asn only                             | 0        | 0.99        | 0.00105         | 0.55(14004)         | 0.535(16757)         | 0.056        | 0.017        |     |
| PGC_SCZ afram only                                 | -        | 0.97        | 0.0118          | -(6152)             | 0.244(3918)          | 0.09         | 0.036        |     |
| PGC_SCZ latino only                                | -        | 0.99        | 0.477           | -(1234)             | 0.494(3090)          | 0.036        | 0.05         |     |
| PGC_SCZ wave2 only                                 | 0        | 1.00        | 0.000724        | 0.716(34850)        | 0.712(44347)         | 0.041        | 0.012        |     |
| PGC_SCZ wave3 (excl. wave2)                        | 0        | 0.99        | 1.74e-05        | 0.544(39926)        | 0.575(56676)         | 0.047        | 0.011        |     |
| <b>PGC_SCZ wave3 (incl. wave2)</b>                 | <b>0</b> | <b>1.00</b> | <b>5.28e-08</b> | <b>0.611(74776)</b> | <b>0.627(101023)</b> | <b>0.044</b> | <b>0.008</b> |     |
| Decode – Replication                               | -        | 1.00        | 0.293           | 0.695(1979)         | 0.679(142627)        | 0.047        | 0.045        |     |
| <b>PGC_SCZ wave3 (incl. wave2 and replication)</b> | <b>0</b> | <b>1.00</b> | <b>3.38e-08</b> | <b>0.613(76755)</b> | <b>0.656(243650)</b> | <b>0.044</b> | <b>0.008</b> |     |

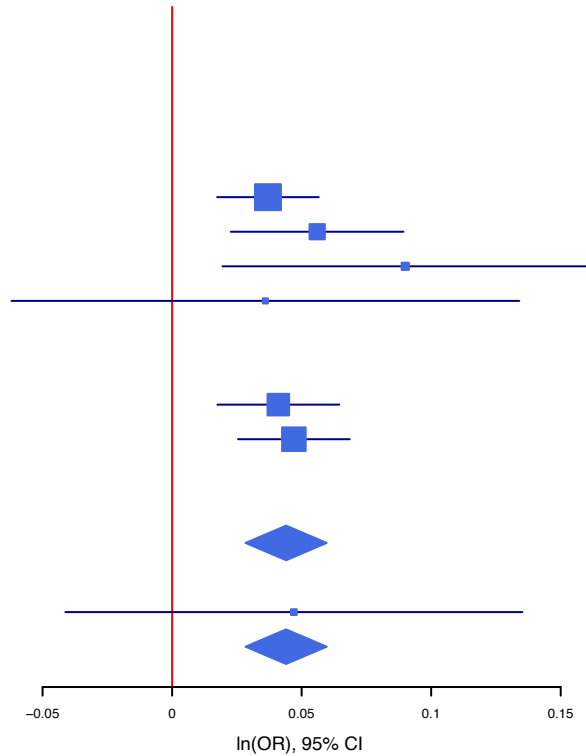

rs10995239

A/G 10:64388365  
+++ het\_P: 0.551 het\_I: 0.0

|                                                    | ngt       | info        | p_value         | f_ca(n)             | f_co(n)              | ln(OR)       | STDerr       |
|----------------------------------------------------|-----------|-------------|-----------------|---------------------|----------------------|--------------|--------------|
| PGC_SCZ wave3 eur only                             | 34        | 1.00        | 7.85e-07        | 0.645(53386)        | 0.637(77258)         | 0.044        | 0.009        |
| PGC_SCZ wave3 asn only                             | 5         | 0.97        | 0.0349          | 0.474(14004)        | 0.46(16757)          | 0.037        | 0.017        |
| PGC_SCZ afram only                                 | -         | 0.99        | 0.941           | -(6152)             | 0.875(3918)          | 0.003        | 0.045        |
| PGC_SCZ latino only                                | -         | 0.99        | 0.201           | -(1234)             | 0.84(3090)           | 0.087        | 0.068        |
| PGC_SCZ wave2 only                                 | 30        | 1.00        | 0.000107        | 0.632(34850)        | 0.63(44347)          | 0.044        | 0.011        |
| PGC_SCZ wave3 (excl. wave2)                        | 9         | 0.98        | 0.000167        | 0.693(39926)        | 0.666(56676)         | 0.041        | 0.011        |
| <b>PGC_SCZ wave3 (incl. wave2)</b>                 | <b>39</b> | <b>0.99</b> | <b>7.49e-08</b> | <b>0.669(74776)</b> | <b>0.652(101023)</b> | <b>0.042</b> | <b>0.008</b> |
| Decode – Replication                               | -         | 1.00        | 0.245           | 0.639(1979)         | 0.65(142627)         | 0.047        | 0.04         |
| <b>PGC_SCZ wave3 (incl. wave2 and replication)</b> | <b>39</b> | <b>1.00</b> | <b>3.38e-08</b> | <b>0.668(76755)</b> | <b>0.651(243650)</b> | <b>0.042</b> | <b>0.008</b> |

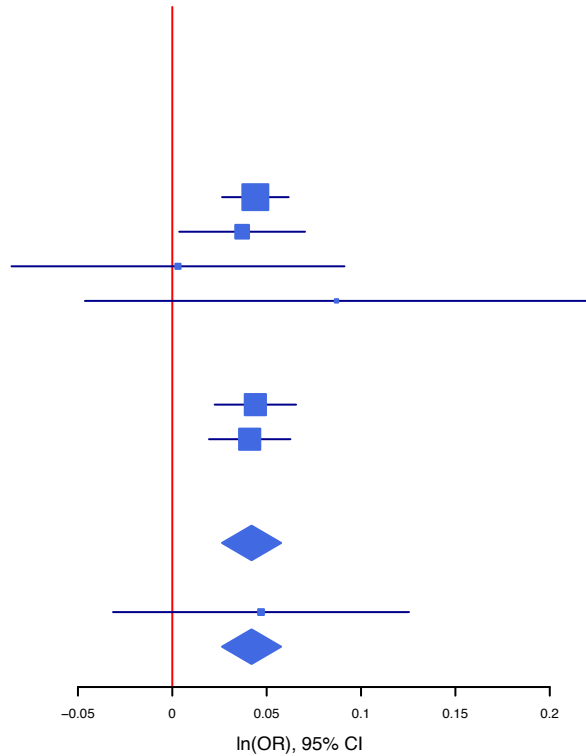



rs11064369                    T/G                    12:6866827  
 ---                    het\_P:                    0.422    het\_I:                    0.0

|                                                    | ngt      | info        | p_value         | f_ca(n)             | f_co(n)              | ln(OR)        | STDerr       |
|----------------------------------------------------|----------|-------------|-----------------|---------------------|----------------------|---------------|--------------|
| PGC_SCZ wave3 eur only                             | 1        | 0.96        | 2.15e-05        | 0.638(53386)        | 0.642(77258)         | -0.039        | 0.009        |
| PGC_SCZ wave3 asn only                             | 1        | 0.90        | 0.0138          | 0.717(14004)        | 0.727(16757)         | -0.049        | 0.02         |
| PGC_SCZ afram only                                 | -        | 0.92        | 0.0666          | -(6152)             | 0.617(3918)          | -0.058        | 0.031        |
| PGC_SCZ latino only                                | -        | 0.99        | 0.0439          | -(1234)             | 0.664(3090)          | -0.106        | 0.052        |
| PGC_SCZ wave2 only                                 | 1        | 0.96        | 0.000642        | 0.64(34850)         | 0.643(44347)         | -0.039        | 0.012        |
| PGC_SCZ wave3 (excl. wave2)                        | 1        | 0.94        | 2.02e-05        | 0.658(39926)        | 0.661(56676)         | -0.047        | 0.011        |
| <b>PGC_SCZ wave3 (incl. wave2)</b>                 | <b>2</b> | <b>0.95</b> | <b>4.92e-08</b> | <b>0.651(74776)</b> | <b>0.654(101023)</b> | <b>-0.043</b> | <b>0.008</b> |
| Decode – Replication                               | -        | 1.00        | 0.487           | 0.681(1979)         | 0.635(142627)        | -0.028        | 0.04         |
| <b>PGC_SCZ wave3 (incl. wave2 and replication)</b> | <b>2</b> | <b>0.98</b> | <b>3.54e-08</b> | <b>0.652(76755)</b> | <b>0.643(243650)</b> | <b>-0.043</b> | <b>0.008</b> |

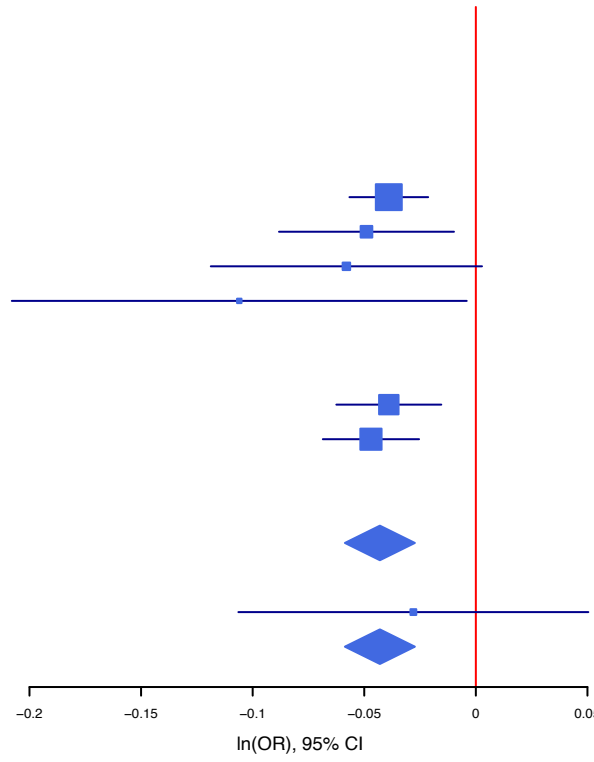

**rs11165917**                      **A/T**                      **1:98304427**  
 --+                                      het\_P:                      0.073    het\_I:    61.8

|                                                    | ngt      | info        | p_value         | f_ca(n)             | f_co(n)              | ln(OR)        | STDerr       |
|----------------------------------------------------|----------|-------------|-----------------|---------------------|----------------------|---------------|--------------|
| PGC_SCZ wave3 eur only                             | 2        | 0.92        | 1.2e-08         | 0.746(53386)        | 0.755(77258)         | -0.059        | 0.01         |
| PGC_SCZ wave3 asn only                             | 0        | 0.68        | 0.252           | 0.894(14004)        | 0.896(16757)         | -0.039        | 0.034        |
| PGC_SCZ afram only                                 | -        | 0.87        | 0.531           | -(6152)             | 0.918(3918)          | 0.036         | 0.058        |
| PGC_SCZ latino only                                | -        | 0.94        | 0.496           | -(1234)             | 0.682(3090)          | 0.038         | 0.056        |
| PGC_SCZ wave2 only                                 | 0        | 0.91        | 1.27e-07        | 0.755(34850)        | 0.762(44347)         | -0.07         | 0.013        |
| PGC_SCZ wave3 (excl. wave2)                        | 2        | 0.86        | 0.0231          | 0.8(39926)          | 0.797(56676)         | -0.032        | 0.014        |
| <b>PGC_SCZ wave3 (incl. wave2)</b>                 | <b>2</b> | <b>0.88</b> | <b>6.42e-08</b> | <b>0.782(74776)</b> | <b>0.784(101023)</b> | <b>-0.052</b> | <b>0.01</b>  |
| Decode – Replication                               | -        | 1.00        | 0.307           | 0.765(1979)         | 0.762(142627)        | -0.045        | 0.044        |
| <b>PGC_SCZ wave3 (incl. wave2 and replication)</b> | <b>2</b> | <b>0.95</b> | <b>3.59e-08</b> | <b>0.782(76755)</b> | <b>0.772(243650)</b> | <b>-0.052</b> | <b>0.009</b> |

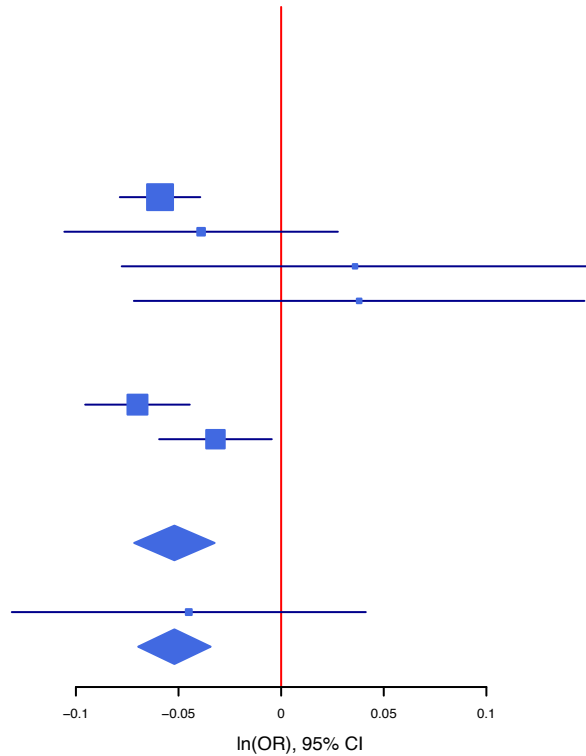

| rs72761691                                         | A/C      | 9:134786548 |                 |                    |                      |               |              |
|----------------------------------------------------|----------|-------------|-----------------|--------------------|----------------------|---------------|--------------|
|                                                    | +-       | het_P:      | 0.335           | het_I:             | 8.6                  |               |              |
|                                                    | ngt      | info        | p_value         | f_ca(n)            | f_co(n)              | ln(OR)        | STDerr       |
| PGC_SCZ wave3 eur only                             | 1        | 0.93        | 2.19e-07        | 0.846(53386)       | 0.853(77258)         | -0.065        | 0.012        |
| PGC_SCZ wave3 asn only                             | 0        | 0.84        | 0.0142          | 0.905(14004)       | 0.911(16757)         | -0.078        | 0.032        |
| PGC_SCZ afram only                                 | -        | 0.92        | 0.929           | -(6152)            | 0.879(3918)          | 0.004         | 0.047        |
| PGC_SCZ latino only                                | -        | 0.96        | 0.512           | -(1234)            | 0.856(3090)          | -0.047        | 0.071        |
| PGC_SCZ wave2 only                                 | 1        | 0.94        | 0.000841        | 0.85(34850)        | 0.853(44347)         | -0.053        | 0.016        |
| PGC_SCZ wave3 (excl. wave2)                        | 0        | 0.91        | 5.9e-06         | 0.867(39926)       | 0.871(56676)         | -0.071        | 0.016        |
| <b>PGC_SCZ wave3 (incl. wave2)</b>                 | <b>1</b> | <b>0.92</b> | <b>2.56e-08</b> | <b>0.86(74776)</b> | <b>0.864(101023)</b> | <b>-0.062</b> | <b>0.011</b> |
| Decode – Replication                               | -        | 1.00        | 0.787           | 0.84(1979)         | 0.846(142627)        | -0.014        | 0.052        |
| <b>PGC_SCZ wave3 (incl. wave2 and replication)</b> | <b>1</b> | <b>0.96</b> | <b>3.63e-08</b> | <b>0.86(76755)</b> | <b>0.854(243650)</b> | <b>-0.06</b>  | <b>0.011</b> |

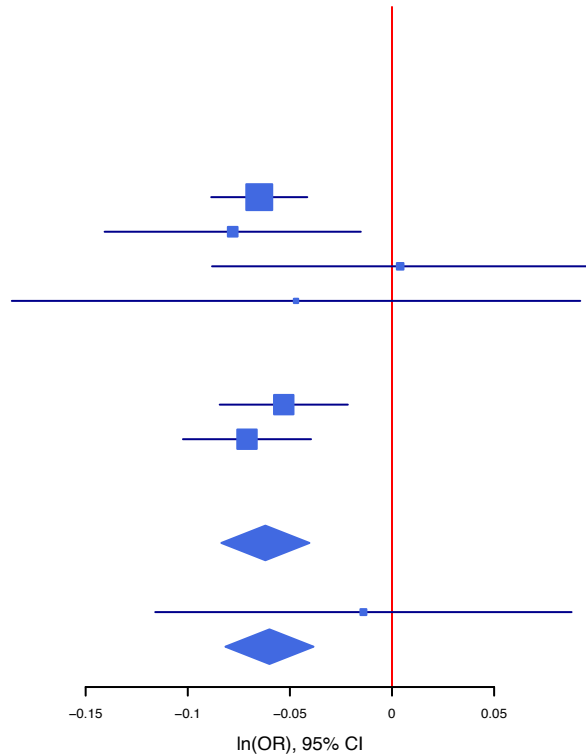

| rs7681616                                          | C/A      |             | 4:143806223     |                     | het_P:               | 0.96         | het_I:       | 0.0 |
|----------------------------------------------------|----------|-------------|-----------------|---------------------|----------------------|--------------|--------------|-----|
|                                                    | ngt      | info        | p_value         | f_ca(n)             |                      |              |              |     |
| PGC_SCZ wave3 eur only                             | 0        | 1.00        | 8.58e-07        | 0.763(53386)        | 0.758(77258)         | 0.05         | 0.01         |     |
| PGC_SCZ wave3 asn only                             | 0        | 0.98        | 0.034           | 0.823(14004)        | 0.815(16757)         | 0.047        | 0.022        |     |
| PGC_SCZ afram only                                 | -        | 0.92        | 0.232           | -(6152)             | 0.719(3918)          | 0.04         | 0.034        |     |
| PGC_SCZ latino only                                | -        | 0.99        | 0.359           | -(1234)             | 0.796(3090)          | 0.057        | 0.062        |     |
| PGC_SCZ wave2 only                                 | 0        | 1.00        | 4.64e-05        | 0.771(34850)        | 0.763(44347)         | 0.052        | 0.013        |     |
| PGC_SCZ wave3 (excl. wave2)                        | 0        | 0.98        | 0.000145        | 0.772(39926)        | 0.769(56676)         | 0.046        | 0.012        |     |
| <b>PGC_SCZ wave3 (incl. wave2)</b>                 | <b>0</b> | <b>0.99</b> | <b>2.7e-08</b>  | <b>0.771(74776)</b> | <b>0.767(101023)</b> | <b>0.049</b> | <b>0.009</b> |     |
| Decode – Replication                               | -        | 1.00        | 0.73            | 0.728(1979)         | 0.728(142627)        | 0.014        | 0.041        |     |
| <b>PGC_SCZ wave3 (incl. wave2 and replication)</b> | <b>0</b> | <b>0.99</b> | <b>3.65e-08</b> | <b>0.77(76755)</b>  | <b>0.745(243650)</b> | <b>0.047</b> | <b>0.009</b> |     |

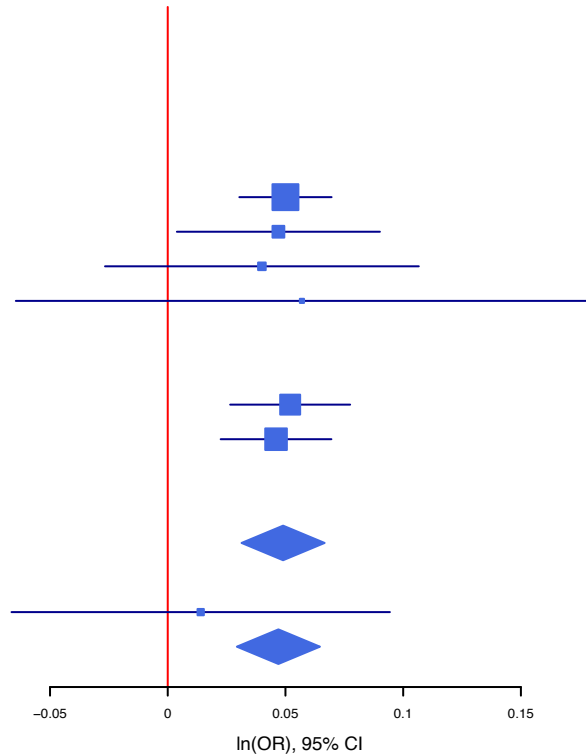

rs12671608

T/C

7:153524115

---

het\_P:

0.525

het\_I:

0.0

ngt info p\_value f\_ca(n) f\_co(n) ln(OR) STDerr

|                                                    |          |             |                 |                     |                      |               |              |
|----------------------------------------------------|----------|-------------|-----------------|---------------------|----------------------|---------------|--------------|
| PGC_SCZ wave3 eur only                             | 0        | 0.95        | 5.36e-07        | 0.861(53386)        | 0.865(77258)         | -0.064        | 0.013        |
| PGC_SCZ wave3 asn only                             | 0        | 0.89        | 0.0448          | 0.795(14004)        | 0.802(16757)         | -0.045        | 0.022        |
| PGC_SCZ afram only                                 | -        | 0.84        | 0.941           | -(6152)             | 0.964(3918)          | -0.006        | 0.086        |
| PGC_SCZ latino only                                | -        | 0.97        | 0.121           | -(1234)             | 0.936(3090)          | -0.155        | 0.1          |
| PGC_SCZ wave2 only                                 | 0        | 0.96        | 1.05e-05        | 0.854(34850)        | 0.865(44347)         | -0.07         | 0.016        |
| PGC_SCZ wave3 (excl. wave2)                        | 0        | 0.92        | 0.000873        | 0.883(39926)        | 0.876(56676)         | -0.05         | 0.015        |
| <b>PGC_SCZ wave3 (incl. wave2)</b>                 | <b>0</b> | <b>0.93</b> | <b>4.44e-08</b> | <b>0.872(74776)</b> | <b>0.872(101023)</b> | <b>-0.06</b>  | <b>0.011</b> |
| Decode - Replication                               | -        | 1.00        | 0.551           | 0.892(1979)         | 0.885(142627)        | -0.033        | 0.055        |
| <b>PGC_SCZ wave3 (incl. wave2 and replication)</b> | <b>0</b> | <b>0.97</b> | <b>3.66e-08</b> | <b>0.872(76755)</b> | <b>0.879(243650)</b> | <b>-0.059</b> | <b>0.011</b> |

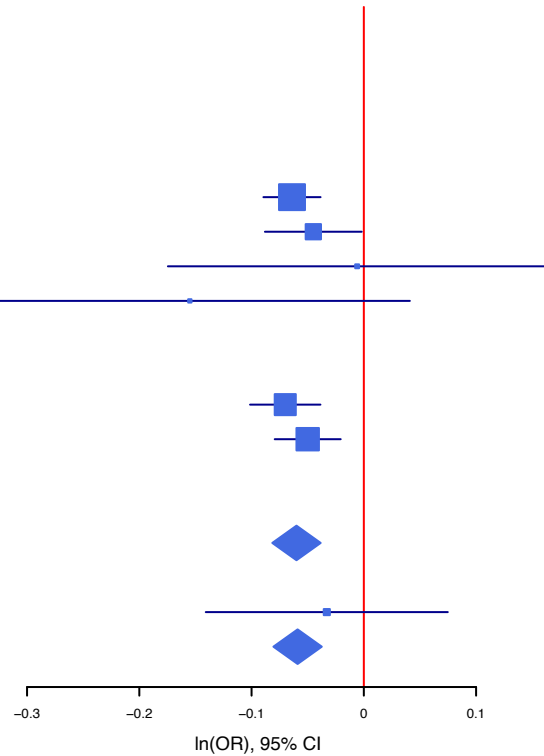



| rs12521434                                         | C/A       | 5:60548959  |                 | het_P:              | 0.304                | het_I:        | 15.9         |  |  |
|----------------------------------------------------|-----------|-------------|-----------------|---------------------|----------------------|---------------|--------------|--|--|
|                                                    | ++        |             |                 |                     |                      |               |              |  |  |
|                                                    | ngt       | info        | p_value         | f_ca(n)             | f_co(n)              | ln(OR)        | STDerr       |  |  |
| PGC_SCZ wave3 eur only                             | 24        | 0.99        | 2e-07           | 0.815(53386)        | 0.822(77258)         | -0.058        | 0.011        |  |  |
| PGC_SCZ afram only                                 | -         | 0.93        | 0.802           | -(6152)             | 0.961(3918)          | 0.02          | 0.079        |  |  |
| PGC_SCZ latino only                                | -         | 0.98        | 0.0248          | -(1234)             | 0.694(3090)          | -0.124        | 0.055        |  |  |
| PGC_SCZ wave2 only                                 | 18        | 1.00        | 0.000123        | 0.812(34850)        | 0.819(44347)         | -0.055        | 0.014        |  |  |
| PGC_SCZ wave3 (excl. wave2)                        | 6         | 0.95        | 7.86e-05        | 0.831(39926)        | 0.831(56676)         | -0.066        | 0.017        |  |  |
| <b>PGC_SCZ wave3 (incl. wave2)</b>                 | <b>24</b> | <b>0.97</b> | <b>4.32e-08</b> | <b>0.822(74776)</b> | <b>0.826(101023)</b> | <b>-0.06</b>  | <b>0.011</b> |  |  |
| Decode - Replication                               | -         | 1.00        | 0.433           | 0.81(1979)          | 0.822(142627)        | -0.038        | 0.048        |  |  |
| <b>PGC_SCZ wave3 (incl. wave2 and replication)</b> | <b>24</b> | <b>0.99</b> | <b>3.66e-08</b> | <b>0.822(76755)</b> | <b>0.824(243650)</b> | <b>-0.059</b> | <b>0.011</b> |  |  |

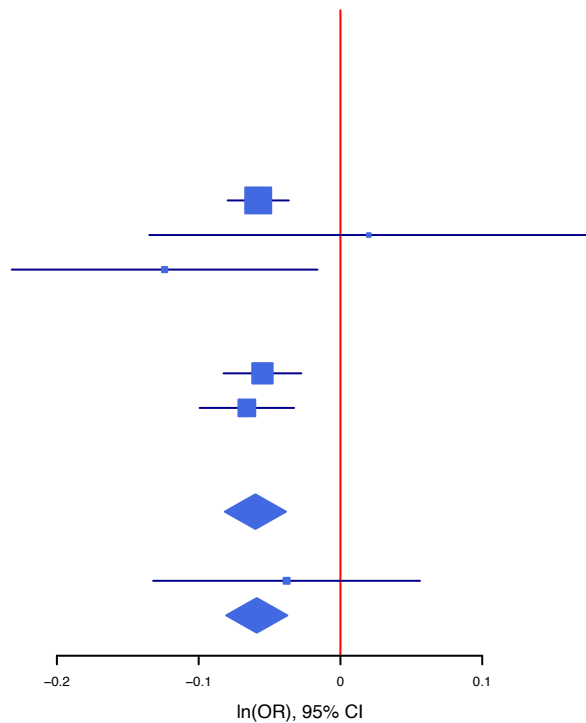

| rs4923457                                          | A/T      |             | 11:27648580     |                    | het_P:               | 0.083        | het_I:       | 59.8 |
|----------------------------------------------------|----------|-------------|-----------------|--------------------|----------------------|--------------|--------------|------|
|                                                    | ngt      | info        | p_value         | f_ca(n)            |                      |              |              |      |
| PGC_SCZ wave3 eur only                             | 0        | 1.00        | 4.12e-06        | 0.801(53386)       | 0.792(77258)         | 0.049        | 0.011        |      |
| PGC_SCZ wave3 asn only                             | 0        | 0.99        | 0.0078          | 0.57(14004)        | 0.553(16757)         | 0.046        | 0.017        |      |
| PGC_SCZ afram only                                 | -        | 0.99        | 0.0634          | -(6152)            | 0.836(3918)          | 0.073        | 0.039        |      |
| PGC_SCZ latino only                                | -        | 0.98        | 0.166           | -(1234)            | 0.812(3090)          | -0.088       | 0.063        |      |
| PGC_SCZ wave2 only                                 | 0        | 1.00        | 0.00285         | 0.791(34850)       | 0.789(44347)         | 0.04         | 0.013        |      |
| PGC_SCZ wave3 (excl. wave2)                        | 0        | 0.99        | 6.8e-06         | 0.757(39926)       | 0.747(56676)         | 0.052        | 0.012        |      |
| <b>PGC_SCZ wave3 (incl. wave2)</b>                 | <b>0</b> | <b>0.99</b> | <b>9.58e-08</b> | <b>0.77(74776)</b> | <b>0.763(101023)</b> | <b>0.047</b> | <b>0.009</b> |      |
| Decode – Replication                               | -        | 1.00        | 0.136           | 0.788(1979)        | 0.781(142627)        | 0.075        | 0.05         |      |
| <b>PGC_SCZ wave3 (incl. wave2 and replication)</b> | <b>0</b> | <b>1.00</b> | <b>3.89e-08</b> | <b>0.77(76755)</b> | <b>0.773(243650)</b> | <b>0.048</b> | <b>0.009</b> |      |

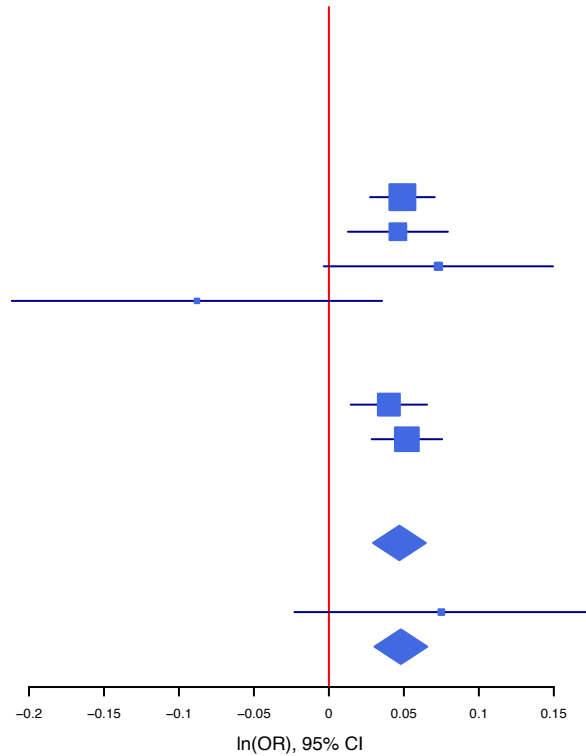

|                                                    | G/A       |             | 9:84736303      |                     |                      |               |              |
|----------------------------------------------------|-----------|-------------|-----------------|---------------------|----------------------|---------------|--------------|
|                                                    | +++       | het_P:      | 0.378           | het_I:              | 0.0                  |               |              |
|                                                    | ngt       | info        | p_value         | f_ca(n)             | f_co(n)              | ln(OR)        | STDerr       |
| PGC_SCZ wave3 eur only                             | 28        | 0.99        | 5.14e-07        | 0.659(53386)        | 0.674(77258)         | -0.046        | 0.009        |
| PGC_SCZ wave3 asn only                             | 5         | 0.95        | 0.411           | 0.362(14004)        | 0.357(16757)         | -0.015        | 0.019        |
| PGC_SCZ afram only                                 | -         | 0.85        | 0.015           | -(6152)             | 0.24(3918)           | -0.095        | 0.039        |
| PGC_SCZ latino only                                | -         | 0.95        | 0.584           | -(1234)             | 0.643(3090)          | -0.029        | 0.054        |
| PGC_SCZ wave2 only                                 | 25        | 0.98        | 5.09e-06        | 0.647(34850)        | 0.674(44347)         | -0.053        | 0.012        |
| PGC_SCZ wave3 (excl. wave2)                        | 8         | 0.95        | 0.00299         | 0.504(39926)        | 0.529(56676)         | -0.033        | 0.011        |
| <b>PGC_SCZ wave3 (incl. wave2)</b>                 | <b>33</b> | <b>0.96</b> | <b>1.4e-07</b>  | <b>0.56(74776)</b>  | <b>0.584(101023)</b> | <b>-0.042</b> | <b>0.008</b> |
| Decode – Replication                               | -         | 1.00        | 0.114           | 0.686(1979)         | 0.647(142627)        | -0.066        | 0.042        |
| <b>PGC_SCZ wave3 (incl. wave2 and replication)</b> | <b>33</b> | <b>0.98</b> | <b>4.01e-08</b> | <b>0.563(76755)</b> | <b>0.619(243650)</b> | <b>-0.043</b> | <b>0.008</b> |

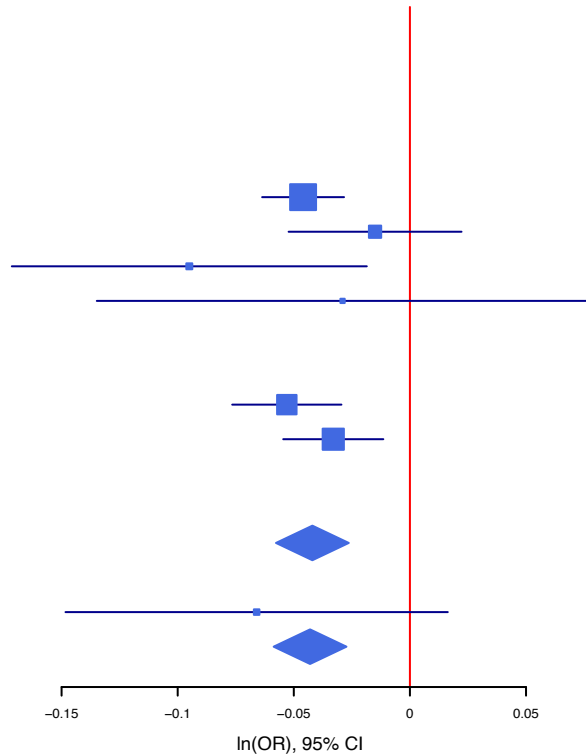

| rs11685270                                         | T/C      |             | 2:193925642     |                     | het_P:               | 0.246       | het_I:       | 28.7 |
|----------------------------------------------------|----------|-------------|-----------------|---------------------|----------------------|-------------|--------------|------|
|                                                    | ++       | +-          | TT              | CT                  |                      |             |              |      |
|                                                    | ngt      | info        | p_value         | f_ca(n)             | f_co(n)              | ln(OR)      | STDerr       |      |
| PGC_SCZ wave3 eur only                             | 0        | 1.00        | 7.52e-07        | 0.489(53386)        | 0.476(77258)         | 0.043       | 0.009        |      |
| PGC_SCZ wave3 asn only                             | 0        | 0.98        | 0.00858         | 0.426(14004)        | 0.41(16757)          | 0.046       | 0.017        |      |
| PGC_SCZ afram only                                 | -        | 0.97        | 0.558           | -(6152)             | 0.813(3918)          | -0.023      | 0.039        |      |
| PGC_SCZ latino only                                | -        | 1.00        | 0.548           | -(1234)             | 0.432(3090)          | 0.03        | 0.05         |      |
| PGC_SCZ wave2 only                                 | 0        | 1.00        | 7.04e-07        | 0.49(34850)         | 0.477(44347)         | 0.054       | 0.011        |      |
| PGC_SCZ wave3 (excl. wave2)                        | 0        | 0.99        | 0.00613         | 0.525(39926)        | 0.504(56676)         | 0.028       | 0.01         |      |
| <b>PGC_SCZ wave3 (incl. wave2)</b>                 | <b>0</b> | <b>0.99</b> | <b>5.94e-08</b> | <b>0.511(74776)</b> | <b>0.493(101023)</b> | <b>0.04</b> | <b>0.008</b> |      |
| Decode – Replication                               | -        | 1.00        | 0.327           | 0.499(1979)         | 0.489(142627)        | 0.037       | 0.037        |      |
| <b>PGC_SCZ wave3 (incl. wave2 and replication)</b> | <b>0</b> | <b>1.00</b> | <b>4.09e-08</b> | <b>0.511(76755)</b> | <b>0.491(243650)</b> | <b>0.04</b> | <b>0.007</b> |      |

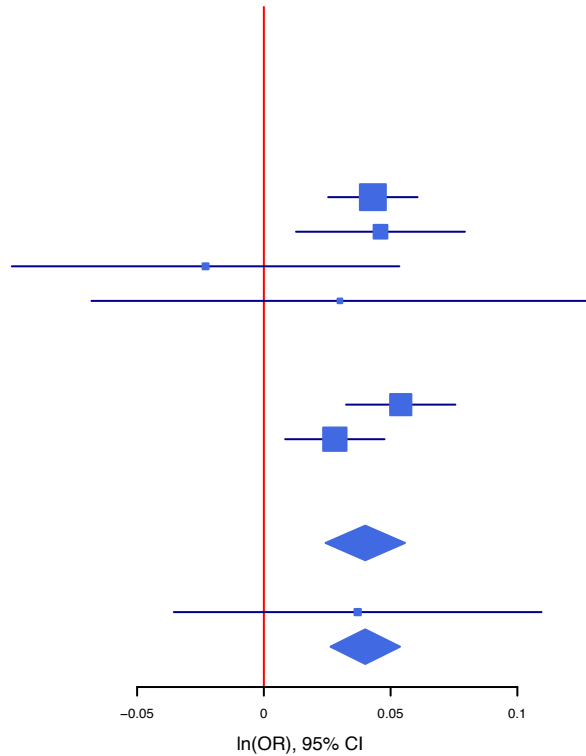

| rs35026989                                         | T/G      |             | 2:155921286     |                     |                      |               |             |
|----------------------------------------------------|----------|-------------|-----------------|---------------------|----------------------|---------------|-------------|
|                                                    | -??      |             | het_P:          | 1.0                 | het_I:               | 0.0           |             |
|                                                    | ngt      | info        | p_value         | f_ca(n)             | f_co(n)              | ln(OR)        | STDerr      |
| PGC_SCZ wave3 eur only                             | 0        | 0.99        | 6.03e-08        | 0.768(53386)        | 0.781(77258)         | -0.056        | 0.01        |
| PGC_SCZ wave3 asn only                             | 0        | 0.99        | 0.254           | 0.918(14004)        | 0.922(16757)         | -0.036        | 0.031       |
| PGC_SCZ wave2 only                                 | 0        | 0.99        | 1.05e-05        | 0.777(34850)        | 0.783(44347)         | -0.058        | 0.013       |
| PGC_SCZ wave3 (excl. wave2)                        | 0        | 0.99        | 0.000871        | 0.822(39926)        | 0.827(56676)         | -0.049        | 0.015       |
| <b>PGC_SCZ wave3 (incl. wave2)</b>                 | <b>0</b> | <b>0.99</b> | <b>3.8e-08</b>  | <b>0.799(74776)</b> | <b>0.806(101023)</b> | <b>-0.054</b> | <b>0.01</b> |
| Decode - Replication                               | -        | 1.00        | 0.774           | 0.754(1979)         | 0.755(142627)        | -0.02         | 0.069       |
| <b>PGC_SCZ wave3 (incl. wave2 and replication)</b> | <b>0</b> | <b>0.99</b> | <b>4.13e-08</b> | <b>0.798(76755)</b> | <b>0.805(243650)</b> | <b>-0.053</b> | <b>0.01</b> |

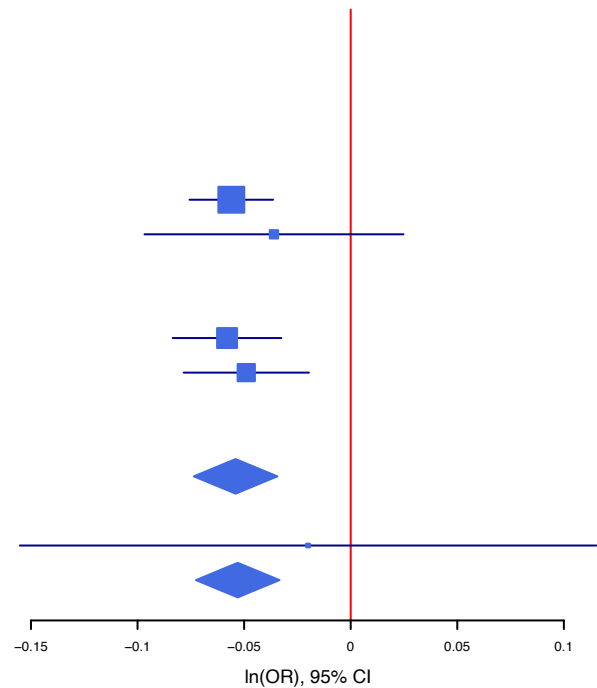

rs17454419 C/T 11:57448493  
 +?? het\_P: 1.0 het\_I: 0.0

|                                                    | ngt      | info        | p_value         | f_ca(n)             | f_co(n)              | ln(OR)        | STDerr       |
|----------------------------------------------------|----------|-------------|-----------------|---------------------|----------------------|---------------|--------------|
| PGC_SCZ wave3 eur only                             | 1        | 0.93        | 1.01e-06        | 0.962(53386)        | 0.966(77258)         | -0.118        | 0.024        |
| PGC_SCZ wave2 only                                 | 1        | 0.91        | 3.03e-05        | 0.962(34850)        | 0.965(44347)         | -0.127        | 0.03         |
| <b>PGC_SCZ wave3 (incl. wave2)</b>                 | <b>1</b> | <b>0.89</b> | <b>3.54e-07</b> | <b>0.964(74776)</b> | <b>0.968(101023)</b> | <b>-0.122</b> | <b>0.024</b> |
| Decode - Replication                               | -        | 1.00        | 0.0199          | 0.966(1979)         | 0.967(142627)        | -0.244        | 0.105        |
| <b>PGC_SCZ wave3 (incl. wave2 and replication)</b> | <b>1</b> | <b>0.95</b> | <b>4.21e-08</b> | <b>0.964(76755)</b> | <b>0.968(243650)</b> | <b>-0.128</b> | <b>0.023</b> |

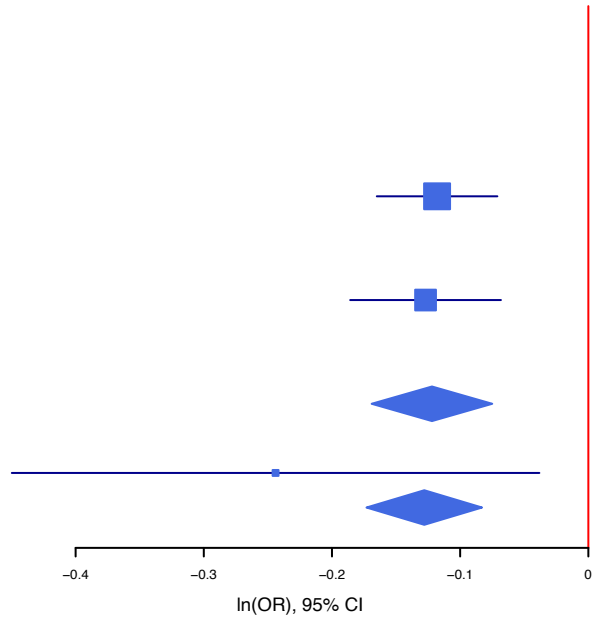

**rs61838368**                      **C/T**                      **1:146963986**  
 +++                      het\_P:                      0.684    het\_I:                      0.0

|                                                    | ngt      | info        | p_value         | f_ca(n)             | f_co(n)              | ln(OR)        | STDerr      |
|----------------------------------------------------|----------|-------------|-----------------|---------------------|----------------------|---------------|-------------|
| PGC_SCZ wave3 eur only                             | 0        | 0.99        | 3.78e-05        | 0.852(53386)        | 0.855(77258)         | -0.05         | 0.012       |
| PGC_SCZ wave3 asn only                             | 1        | 0.99        | 0.00184         | 0.775(14004)        | 0.789(16757)         | -0.064        | 0.021       |
| PGC_SCZ afram only                                 | -        | 0.97        | 0.565           | -(6152)             | 0.803(3918)          | -0.021        | 0.037       |
| PGC_SCZ latino only                                | -        | 1.04        | 0.561           | -(1234)             | 0.82(3090)           | -0.037        | 0.064       |
| PGC_SCZ wave2 only                                 | 0        | 0.99        | 0.0012          | 0.844(34850)        | 0.851(44347)         | -0.049        | 0.015       |
| PGC_SCZ wave3 (excl. wave2)                        | 1        | 0.99        | 7.03e-05        | 0.821(39926)        | 0.829(56676)         | -0.053        | 0.013       |
| <b>PGC_SCZ wave3 (incl. wave2)</b>                 | <b>1</b> | <b>0.99</b> | <b>2.7e-07</b>  | <b>0.83(74776)</b>  | <b>0.837(101023)</b> | <b>-0.051</b> | <b>0.01</b> |
| Decode – Replication                               | -        | 1.00        | 0.0173          | 0.862(1979)         | 0.857(142627)        | -0.129        | 0.054       |
| <b>PGC_SCZ wave3 (incl. wave2 and replication)</b> | <b>1</b> | <b>1.00</b> | <b>4.29e-08</b> | <b>0.831(76755)</b> | <b>0.848(243650)</b> | <b>-0.054</b> | <b>0.01</b> |

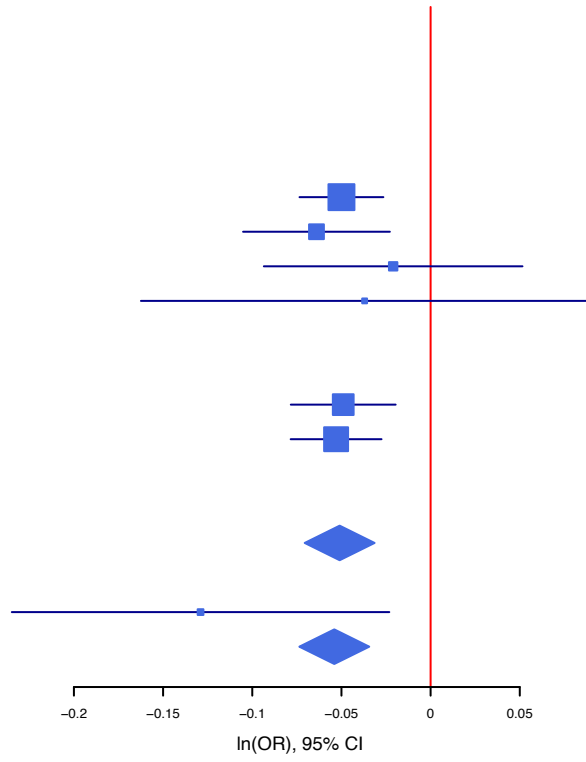

| rs221902                                           | G/T       |             | 14:71601079     |                     |                      |              |              |
|----------------------------------------------------|-----------|-------------|-----------------|---------------------|----------------------|--------------|--------------|
|                                                    | ---+      |             | het_P:          | 0.499               | het_I:               | 0.0          |              |
|                                                    | ngt       | info        | p_value         | f_ca(n)             | f_co(n)              | ln(OR)       | STDerr       |
| PGC_SCZ wave3 eur only                             | 20        | 0.99        | 1.46e-05        | 0.357(53386)        | 0.345(77258)         | 0.039        | 0.009        |
| PGC_SCZ wave3 asn only                             | 3         | 0.98        | 0.00611         | 0.591(14004)        | 0.59(16757)          | 0.048        | 0.018        |
| PGC_SCZ afram only                                 | -         | 0.98        | 0.0594          | -(6152)             | 0.392(3918)          | 0.057        | 0.03         |
| PGC_SCZ latino only                                | -         | 1.01        | 0.817           | -(1234)             | 0.483(3090)          | -0.011       | 0.05         |
| PGC_SCZ wave2 only                                 | 12        | 0.99        | 3.38e-10        | 0.369(34850)        | 0.347(44347)         | 0.072        | 0.011        |
| PGC_SCZ wave3 (excl. wave2)                        | 11        | 0.99        | 0.141           | 0.441(39926)        | 0.43(56676)          | 0.015        | 0.01         |
| <b>PGC_SCZ wave3 (incl. wave2)</b>                 | <b>23</b> | <b>0.99</b> | <b>8.81e-08</b> | <b>0.413(74776)</b> | <b>0.398(101023)</b> | <b>0.041</b> | <b>0.008</b> |
| Decode – Replication                               | -         | 1.00        | 0.324           | 0.37(1979)          | 0.372(142627)        | 0.039        | 0.039        |
| <b>PGC_SCZ wave3 (incl. wave2 and replication)</b> | <b>23</b> | <b>1.00</b> | <b>4.47e-08</b> | <b>0.412(76755)</b> | <b>0.383(243650)</b> | <b>0.041</b> | <b>0.008</b> |

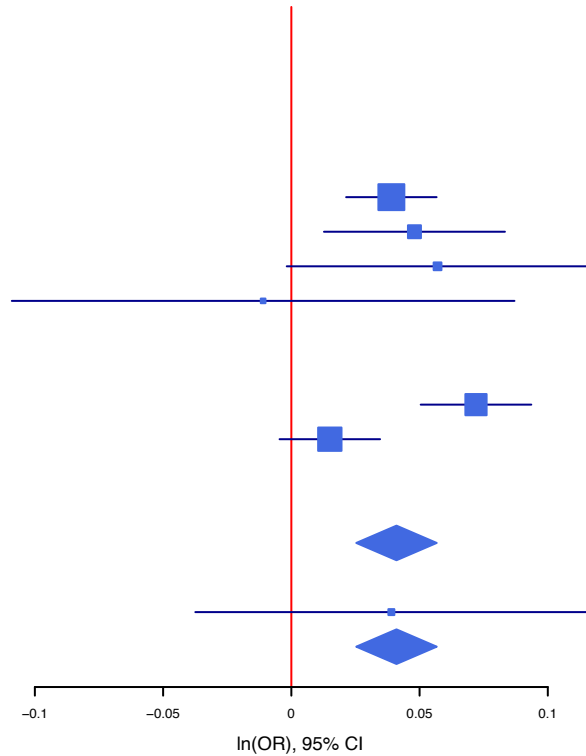



| rs76365544                                         | G/C      |             | 22:44146279     |                    | het_P:               | 1.0          | het_I:       | 0.0 |
|----------------------------------------------------|----------|-------------|-----------------|--------------------|----------------------|--------------|--------------|-----|
|                                                    | -??      |             |                 |                    |                      |              |              |     |
|                                                    | ngt      | info        | p_value         | f_ca(n)            | f_co(n)              | ln(OR)       | STDerr       |     |
| PGC_SCZ wave3 eur only                             | 0        | 0.81        | 4.74e-07        | 0.98(53386)        | 0.977(77258)         | 0.17         | 0.034        |     |
| PGC_SCZ wave2 only                                 | 0        | 0.84        | 1.01e-06        | 0.981(34850)       | 0.977(44347)         | 0.212        | 0.043        |     |
| <b>PGC_SCZ wave3 (incl. wave2)</b>                 | <b>0</b> | <b>0.80</b> | <b>2.93e-07</b> | <b>0.98(74776)</b> | <b>0.977(101023)</b> | <b>0.172</b> | <b>0.034</b> |     |
| Decode - Replication                               | -        | 1.00        | 0.0362          | 0.985(1979)        | 0.983(142627)        | 0.301        | 0.144        |     |
| <b>PGC_SCZ wave3 (incl. wave2 and replication)</b> | <b>0</b> | <b>0.92</b> | <b>4.5e-08</b>  | <b>0.98(76755)</b> | <b>0.981(243650)</b> | <b>0.179</b> | <b>0.033</b> |     |

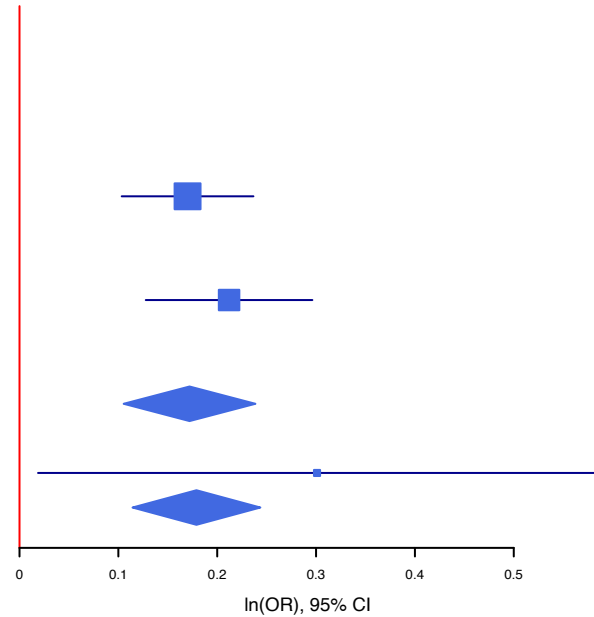

| rs2189336                                          | G/A       |             | 17:5326162      |                     | het_P:               | 0.204        | het_I:       | 37.1 |
|----------------------------------------------------|-----------|-------------|-----------------|---------------------|----------------------|--------------|--------------|------|
|                                                    | ngt       | info        | p_value         | f_ca(n)             |                      |              |              |      |
| PGC_SCZ wave3 eur only                             | 10        | 0.98        | 2.86e-07        | 0.513(53386)        | 0.503(77258)         | 0.045        | 0.009        |      |
| PGC_SCZ wave3 asn only                             | 4         | 0.95        | 0.324           | 0.105(14004)        | 0.094(16757)         | -0.037       | 0.038        |      |
| PGC_SCZ afram only                                 | -         | 0.96        | 0.0728          | -(6152)             | 0.165(3918)          | 0.074        | 0.041        |      |
| PGC_SCZ latino only                                | -         | 0.98        | 0.429           | -(1234)             | 0.444(3090)          | -0.04        | 0.051        |      |
| PGC_SCZ wave2 only                                 | 9         | 0.99        | 0.00255         | 0.485(34850)        | 0.49(44347)          | 0.034        | 0.011        |      |
| PGC_SCZ wave3 (excl. wave2)                        | 5         | 0.97        | 0.000104        | 0.343(39926)        | 0.355(56676)         | 0.047        | 0.012        |      |
| <b>PGC_SCZ wave3 (incl. wave2)</b>                 | <b>14</b> | <b>0.98</b> | <b>1.34e-06</b> | <b>0.399(74776)</b> | <b>0.407(101023)</b> | <b>0.04</b>  | <b>0.008</b> |      |
| Decode – Replication                               | -         | 1.00        | 0.00055         | 0.462(1979)         | 0.473(142627)        | 0.129        | 0.037        |      |
| <b>PGC_SCZ wave3 (incl. wave2 and replication)</b> | <b>14</b> | <b>0.99</b> | <b>4.52e-08</b> | <b>0.4(76755)</b>   | <b>0.444(243650)</b> | <b>0.044</b> | <b>0.008</b> |      |

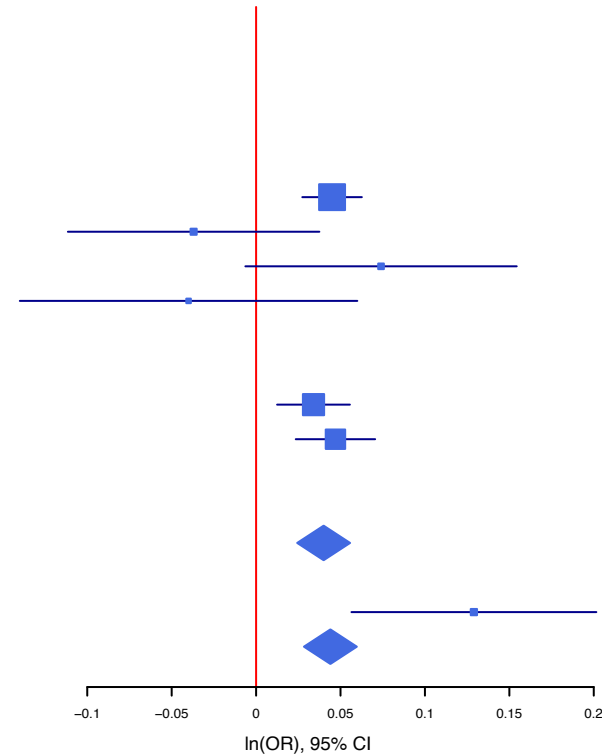

rs77174383

T/C  
---  
3:45317571  
het\_P: 0.583 het\_I: 0.0

|                                                    | ngt      | info        | p_value         | f_ca(n)             | f_co(n)              | ln(OR)        | STDerr       |
|----------------------------------------------------|----------|-------------|-----------------|---------------------|----------------------|---------------|--------------|
| PGC_SCZ wave3 eur only                             | 0        | 1.00        | 2.85e-07        | 0.844(53386)        | 0.854(77258)         | -0.062        | 0.012        |
| PGC_SCZ wave3 asn only                             | 0        | 0.92        | 0.313           | 0.909(14004)        | 0.915(16757)         | -0.032        | 0.031        |
| PGC_SCZ afram only                                 | -        | 0.97        | 0.726           | -(6152)             | 0.963(3918)          | -0.028        | 0.079        |
| PGC_SCZ latino only                                | -        | 1.00        | 0.0945          | -(1234)             | 0.906(3090)          | -0.138        | 0.082        |
| PGC_SCZ wave2 only                                 | 0        | 1.00        | 1.2e-05         | 0.848(34850)        | 0.857(44347)         | -0.067        | 0.015        |
| PGC_SCZ wave3 (excl. wave2)                        | 0        | 0.97        | 0.00172         | 0.894(39926)        | 0.891(56676)         | -0.05         | 0.016        |
| <b>PGC_SCZ wave3 (incl. wave2)</b>                 | <b>0</b> | <b>0.98</b> | <b>9.5e-08</b>  | <b>0.876(74776)</b> | <b>0.878(101023)</b> | <b>-0.059</b> | <b>0.011</b> |
| Decode - Replication                               | -        | 1.00        | 0.218           | 0.852(1979)         | 0.861(142627)        | -0.063        | 0.051        |
| <b>PGC_SCZ wave3 (incl. wave2 and replication)</b> | <b>0</b> | <b>0.99</b> | <b>4.57e-08</b> | <b>0.875(76755)</b> | <b>0.868(243650)</b> | <b>-0.059</b> | <b>0.011</b> |

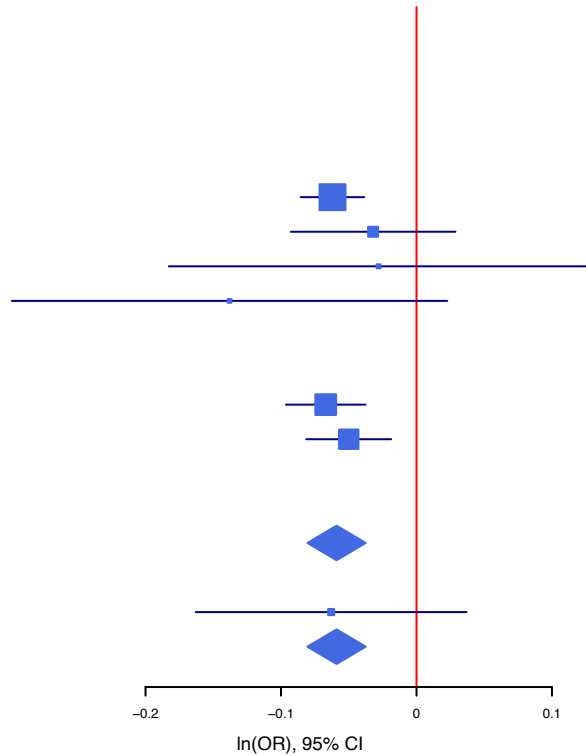

|                                                    | G/A      |             | 4:156217478     |                     | het_P:               | 0.549         | het_I:       | 0.0 |
|----------------------------------------------------|----------|-------------|-----------------|---------------------|----------------------|---------------|--------------|-----|
|                                                    | ngt      | info        | p_value         | f_ca(n)             |                      |               |              |     |
| PGC_SCZ wave3 eur only                             | 0        | 1.00        | 5.56e-06        | 0.444(53386)        | 0.451(77258)         | -0.039        | 0.009        |     |
| PGC_SCZ wave3 asn only                             | 0        | 0.91        | 0.0688          | 0.113(14004)        | 0.111(16757)         | -0.053        | 0.029        |     |
| PGC_SCZ afram only                                 | -        | 0.98        | 0.0568          | -(6152)             | 0.101(3918)          | -0.095        | 0.05         |     |
| PGC_SCZ latino only                                | -        | 0.97        | 0.323           | -(1234)             | 0.448(3090)          | -0.05         | 0.051        |     |
| PGC_SCZ wave2 only                                 | 0        | 1.00        | 0.000287        | 0.422(34850)        | 0.439(44347)         | -0.04         | 0.011        |     |
| PGC_SCZ wave3 (excl. wave2)                        | 0        | 0.97        | 0.000175        | 0.305(39926)        | 0.326(56676)         | -0.044        | 0.012        |     |
| <b>PGC_SCZ wave3 (incl. wave2)</b>                 | <b>0</b> | <b>0.98</b> | <b>1.94e-07</b> | <b>0.351(74776)</b> | <b>0.369(101023)</b> | <b>-0.042</b> | <b>0.008</b> |     |
| Decode – Replication                               | -        | 1.00        | 0.0698          | 0.452(1979)         | 0.442(142627)        | -0.069        | 0.038        |     |
| <b>PGC_SCZ wave3 (incl. wave2 and replication)</b> | <b>0</b> | <b>0.99</b> | <b>4.71e-08</b> | <b>0.353(76755)</b> | <b>0.409(243650)</b> | <b>-0.043</b> | <b>0.008</b> |     |

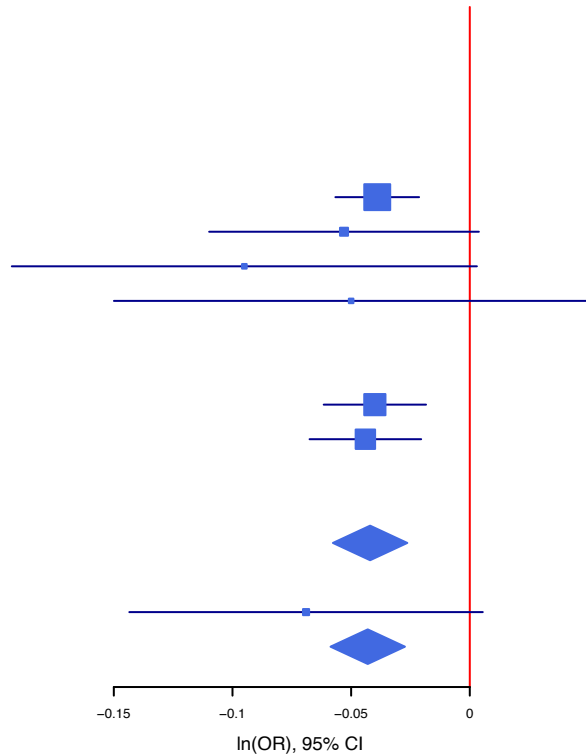

rs3923569                    T/A                    7:70768717  
 +--                    het\_P:                    0.152    het\_I:                    46.9

|                        | ngt | info | p_value  | f_ca(n)      | f_co(n)      | ln(OR) | STDerr |
|------------------------|-----|------|----------|--------------|--------------|--------|--------|
| PGC_SCZ wave3 eur only | 0   | 1.00 | 5.11e-05 | 0.279(53386) | 0.288(77258) | -0.039 | 0.01   |
| PGC_SCZ wave3 asn only | 0   | 0.99 | 7.38e-06 | 0.44(14004)  | 0.464(16757) | -0.077 | 0.017  |
| PGC_SCZ afram only     | -   | 0.98 | 0.851    | -(6152)      | 0.396(3918)  | 0.006  | 0.03   |
| PGC_SCZ latino only    | -   | 0.99 | 0.882    | -(1234)      | 0.273(3090)  | 0.008  | 0.056  |

|                             |   |      |          |              |              |        |       |
|-----------------------------|---|------|----------|--------------|--------------|--------|-------|
| PGC_SCZ wave2 only          | 0 | 1.00 | 0.0042   | 0.287(34850) | 0.289(44347) | -0.034 | 0.012 |
| PGC_SCZ wave3 (excl. wave2) | 0 | 0.99 | 3.15e-06 | 0.337(39926) | 0.342(56676) | -0.05  | 0.011 |

**PGC\_SCZ wave3 (incl. wave2)**                    **0**    **0.99**    **6.13e-08**    **0.317(74776)**    **0.322(101023)**    **-0.043**    **0.008**

Decode – Replication                    -    1.00    0.506    0.275(1979)    0.285(142627)    -0.028    0.042

**PGC\_SCZ wave3 (incl. wave2 and replication)**                    **0**    **1.00**    **4.78e-08**    **0.316(76755)**    **0.302(243650)**    **-0.042**    **0.008**

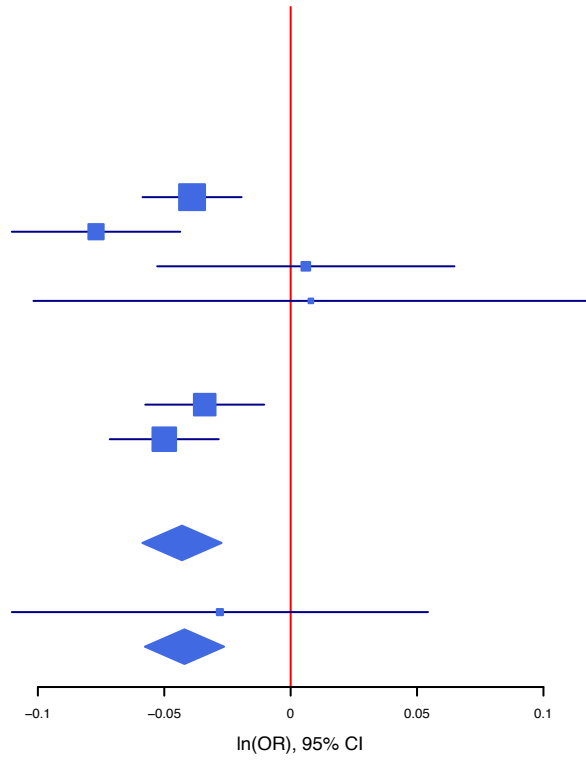

| rs7225476                                          | G/A       |             | 17:78561603     |                    | het_P:               | 0.211         | het_I:       | 35.8 |
|----------------------------------------------------|-----------|-------------|-----------------|--------------------|----------------------|---------------|--------------|------|
|                                                    | ngt       | info        | p_value         | f_ca(n)            |                      |               |              |      |
| PGC_SCZ wave3 eur only                             | 33        | 1.00        | 9.23e-07        | 0.452(53386)       | 0.46(77258)          | -0.042        | 0.009        |      |
| PGC_SCZ wave3 asn only                             | 6         | 1.00        | 0.513           | 0.473(14004)       | 0.475(16757)         | -0.011        | 0.017        |      |
| PGC_SCZ afram only                                 | -         | 0.95        | 0.571           | -(6152)            | 0.245(3918)          | -0.02         | 0.035        |      |
| PGC_SCZ latino only                                | -         | 1.01        | 0.0159          | -(1234)            | 0.614(3090)          | -0.123        | 0.051        |      |
| PGC_SCZ wave2 only                                 | 25        | 1.00        | 3.78e-06        | 0.452(34850)       | 0.46(44347)          | -0.05         | 0.011        |      |
| PGC_SCZ wave3 (excl. wave2)                        | 14        | 0.99        | 0.0125          | 0.448(39926)       | 0.454(56676)         | -0.026        | 0.01         |      |
| <b>PGC_SCZ wave3 (incl. wave2)</b>                 | <b>39</b> | <b>0.99</b> | <b>6.49e-07</b> | <b>0.45(74776)</b> | <b>0.457(101023)</b> | <b>-0.037</b> | <b>0.007</b> |      |
| Decode – Replication                               | -         | 1.00        | 0.00438         | 0.452(1979)        | 0.437(142627)        | -0.108        | 0.038        |      |
| <b>PGC_SCZ wave3 (incl. wave2 and replication)</b> | <b>39</b> | <b>1.00</b> | <b>4.93e-08</b> | <b>0.45(76755)</b> | <b>0.446(243650)</b> | <b>-0.04</b>  | <b>0.007</b> |      |

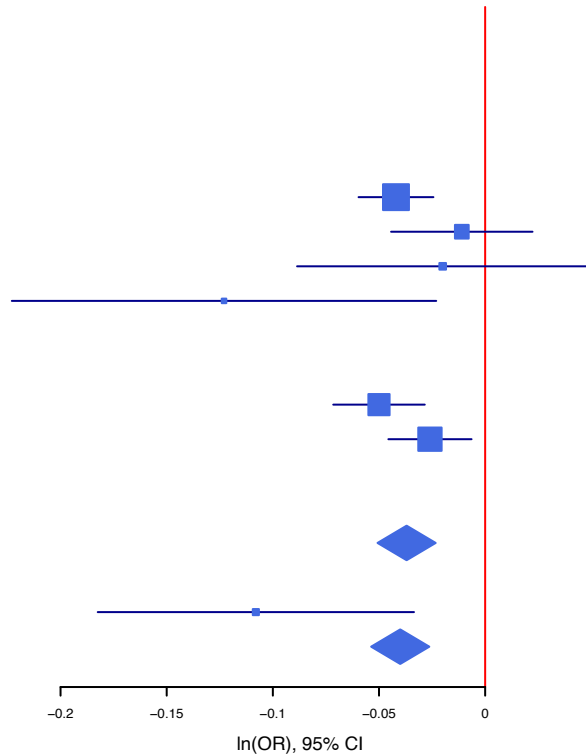

rs67781210

A/G  
---  
het\_P: 0.683 het\_I: 0.0

1:95620418

|                                                    | ngt      | info        | p_value         | f_ca(n)             | f_co(n)              | ln(OR)        | STDerr       |
|----------------------------------------------------|----------|-------------|-----------------|---------------------|----------------------|---------------|--------------|
| PGC_SCZ wave3 eur only                             | 0        | 0.93        | 2.55e-06        | 0.64(53386)         | 0.65(77258)          | -0.044        | 0.009        |
| PGC_SCZ wave3 asn only                             | 0        | 0.83        | 0.0784          | 0.87(14004)         | 0.873(16757)         | -0.049        | 0.028        |
| PGC_SCZ afram only                                 | -        | 0.97        | 0.408           | -(6152)             | 0.914(3918)          | -0.045        | 0.054        |
| PGC_SCZ latino only                                | -        | 0.94        | 0.0933          | -(1234)             | 0.706(3090)          | -0.094        | 0.056        |
| PGC_SCZ wave2 only                                 | 0        | 0.94        | 1.87e-05        | 0.655(34850)        | 0.658(44347)         | -0.051        | 0.012        |
| PGC_SCZ wave3 (excl. wave2)                        | 0        | 0.91        | 0.00156         | 0.758(39926)        | 0.746(56676)         | -0.04         | 0.013        |
| <b>PGC_SCZ wave3 (incl. wave2)</b>                 | <b>0</b> | <b>0.92</b> | <b>1.17e-07</b> | <b>0.717(74776)</b> | <b>0.712(101023)</b> | <b>-0.045</b> | <b>0.009</b> |
| Decode – Replication                               | -        | 1.00        | 0.182           | 0.658(1979)         | 0.672(142627)        | -0.053        | 0.04         |
| <b>PGC_SCZ wave3 (incl. wave2 and replication)</b> | <b>0</b> | <b>0.96</b> | <b>4.95e-08</b> | <b>0.716(76755)</b> | <b>0.69(243650)</b>  | <b>-0.046</b> | <b>0.008</b> |

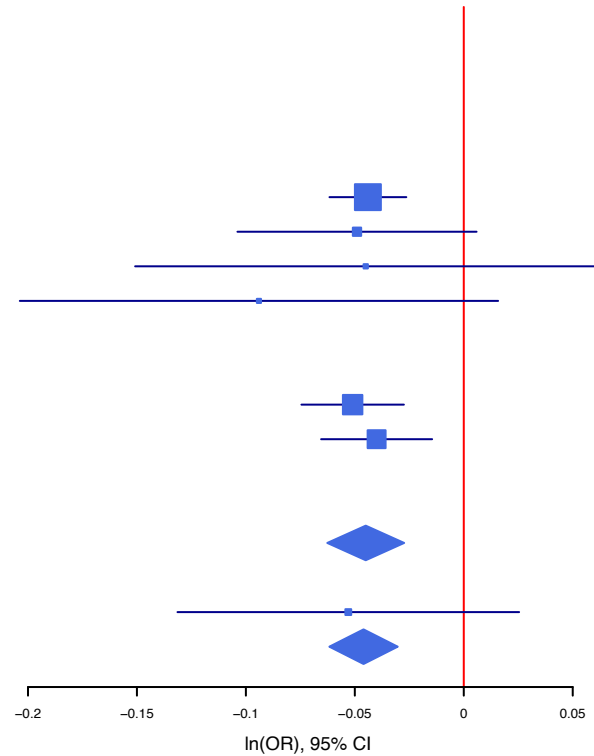

**rs10777341**                      **A/T**                      **12:92256818**  
 --+                                      het\_P:                      0.202    het\_I:                      37.5

|                        | ngt | info | p_value  | f_ca(n)      | f_co(n)      | ln(OR) | STDerr |
|------------------------|-----|------|----------|--------------|--------------|--------|--------|
| PGC_SCZ wave3 eur only | 0   | 0.99 | 2.47e-07 | 0.376(53386) | 0.383(77258) | -0.046 | 0.009  |
| PGC_SCZ wave3 asn only | 0   | 0.98 | 0.0547   | 0.272(14004) | 0.278(16757) | -0.037 | 0.019  |
| PGC_SCZ afram only     | -   | 0.99 | 0.588    | -(6152)      | 0.712(3918)  | -0.018 | 0.033  |
| PGC_SCZ latino only    | -   | 0.99 | 0.379    | -(1234)      | 0.242(3090)  | 0.051  | 0.058  |

|                             |   |      |          |              |              |        |       |
|-----------------------------|---|------|----------|--------------|--------------|--------|-------|
| PGC_SCZ wave2 only          | 0 | 0.99 | 7.07e-07 | 0.366(34850) | 0.379(44347) | -0.056 | 0.011 |
| PGC_SCZ wave3 (excl. wave2) | 0 | 0.98 | 0.00975  | 0.396(39926) | 0.389(56676) | -0.028 | 0.011 |

**PGC\_SCZ wave3 (incl. wave2)**                      **0**    **0.99**    **1.18e-07**    **0.384(74776)**    **0.386(101023)**    **-0.041**    **0.008**

Decode – Replication                      -    1.00    0.186    0.41(1979)    0.377(142627)    -0.052    0.039

**PGC\_SCZ wave3 (incl. wave2 and replication)**                      **0**    **0.99**    **4.99e-08**    **0.385(76755)**    **0.381(243650)**    **-0.042**    **0.008**

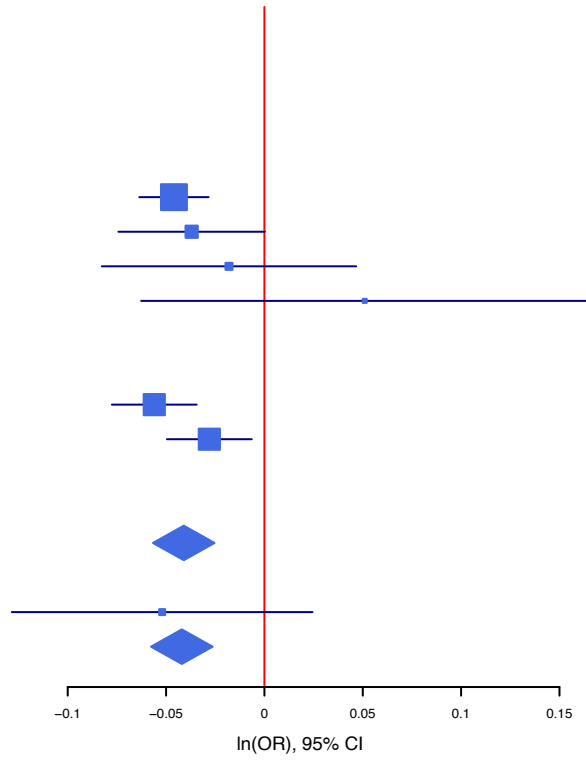



rs12514660

G/C 5:63727966  
+?? het\_P: 1.0 het\_I: 0.0

|                                                    | ngt      | info        | p_value         | f_ca(n)             | f_co(n)              | ln(OR)        | STDerr       |
|----------------------------------------------------|----------|-------------|-----------------|---------------------|----------------------|---------------|--------------|
| PGC_SCZ wave3 eur only                             | 0        | 1.00        | 1.15e-05        | 0.377(53386)        | 0.384(77258)         | -0.039        | 0.009        |
| PGC_SCZ wave3 asn only                             | 0        | 0.98        | 0.00385         | 0.214(14004)        | 0.226(16757)         | -0.06         | 0.021        |
| PGC_SCZ wave2 only                                 | 0        | 1.00        | 9.28e-06        | 0.365(34850)        | 0.377(44347)         | -0.05         | 0.011        |
| PGC_SCZ wave3 (excl. wave2)                        | 0        | 0.99        | 0.00458         | 0.32(39926)         | 0.337(56676)         | -0.034        | 0.012        |
| <b>PGC_SCZ wave3 (incl. wave2)</b>                 | <b>0</b> | <b>1.00</b> | <b>2.01e-07</b> | <b>0.343(74776)</b> | <b>0.356(101023)</b> | <b>-0.042</b> | <b>0.008</b> |
| Decode - Replication                               | -        | 1.00        | 0.0731          | 0.367(1979)         | 0.367(142627)        | -0.071        | 0.04         |
| <b>PGC_SCZ wave3 (incl. wave2 and replication)</b> | <b>0</b> | <b>1.00</b> | <b>4.99e-08</b> | <b>0.344(76755)</b> | <b>0.363(243650)</b> | <b>-0.043</b> | <b>0.008</b> |

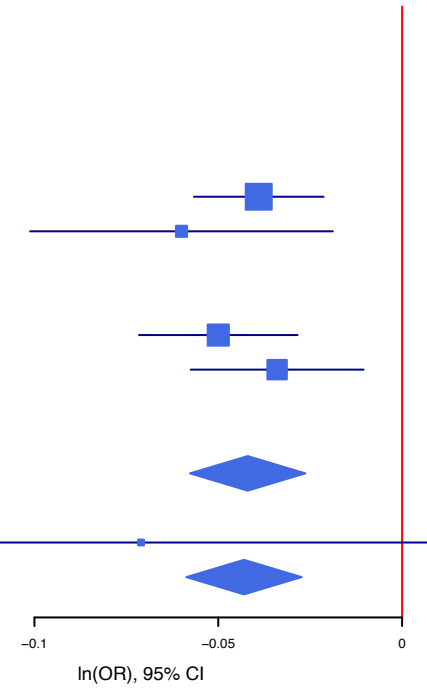

Supplement: NIHMS1824605-supplement-Fig_S2a.pdf [file NIHMS1824605-supplement-Fig_S2a.pdf]
