# Supplementary material
Source: PubMed Central journal article supplement (PMC9392466)

rs1378559                    T/C                    23:21380266  
 +++                    het\_P:                    0.578    het\_I:                    0.0

|                                                    | ngt | info        | p_value         | f_ca(n)             | f_co(n)              | ln(OR)       | STDerr       |
|----------------------------------------------------|-----|-------------|-----------------|---------------------|----------------------|--------------|--------------|
| PGC_SCZ wave3 eur (incl. wave2)                    | -   | 1.32        | 5.12e-16        | 0.862(49866)        | 0.846(67582)         | 0.09         | 0.011        |
| PGC_SCZ wave3 asn (incl. wave2)                    | -   | 1.09        | 0.00793         | 0.749(11618)        | 0.733(14566)         | 0.053        | 0.02         |
| PGC_SCZ afram only                                 | -   | 1.00        | 0.274           | 0.988(6152)         | 0.988(3918)          | 0.135        | 0.11         |
| PGC_SCZ latino only                                | -   | 1.00        | 0.798           | 0.942(1234)         | 0.942(3090)          | -0.025       | 0.099        |
| PGC_SCZ trio only                                  | -   | 1.58        | 0.174           | 0.775(2918)         | 0.762(2918)          | 0.048        | 0.035        |
| <b>PGC_SCZ wave3 (incl. wave2)</b>                 | -   | <b>1.27</b> | <b>1.95e-17</b> | <b>0.853(71788)</b> | <b>0.835(92074)</b>  | <b>0.078</b> | <b>0.009</b> |
| Decode - Replication                               | -   | 1.00        | 0.0323          | 0.851(1527)         | 0.864(141826)        | 0.113        | 0.053        |
| <b>PGC_SCZ wave3 (incl. wave2 and replication)</b> | -   | <b>1.11</b> | <b>1.9e-18</b>  | <b>0.853(73315)</b> | <b>0.852(233900)</b> | <b>0.079</b> | <b>0.009</b> |

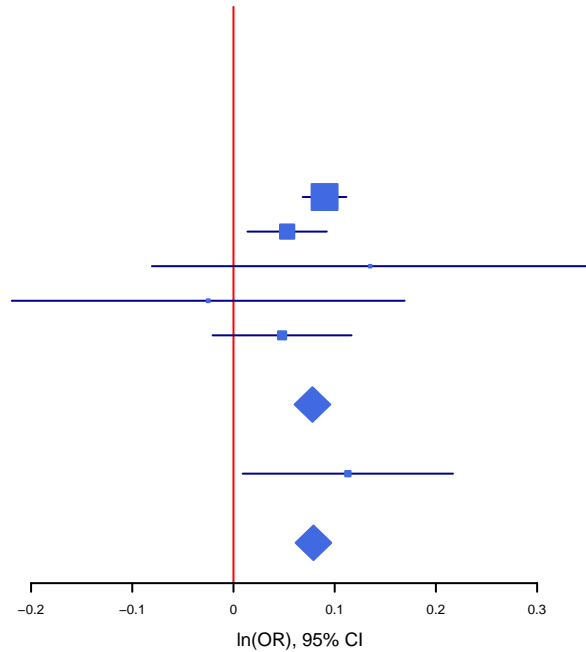

rs11539157                    C/A                    23:68381264  
 +--                    het\_P:                    0.169    het\_I:    43.7

|                                                    | ngt | info        | p_value         | f_ca(n)             | f_co(n)              | ln(OR)        | STDerr       |
|----------------------------------------------------|-----|-------------|-----------------|---------------------|----------------------|---------------|--------------|
| PGC_SCZ wave3 eur (incl. wave2)                    | -   | 1.42        | 9.13e-15        | 0.739(49866)        | 0.758(67582)         | -0.067        | 0.009        |
| PGC_SCZ afram only                                 | -   | 1.00        | 0.398           | 0.987(6152)         | 0.987(3918)          | -0.066        | 0.078        |
| PGC_SCZ latino only                                | -   | 1.00        | 0.831           | 0.868(1234)         | 0.868(3090)          | -0.023        | 0.106        |
| <b>PGC_SCZ wave3 (incl. wave2)</b>                 | -   | <b>1.39</b> | <b>8.4e-15</b>  | <b>0.762(71788)</b> | <b>0.771(92074)</b>  | <b>-0.067</b> | <b>0.009</b> |
| Decode - Replication                               | -   | 1.00        | 0.714           | 0.758(1527)         | 0.761(141826)        | 0.016         | 0.044        |
| <b>PGC_SCZ wave3 (incl. wave2 and replication)</b> | -   | <b>1.15</b> | <b>3.98e-14</b> | <b>0.762(73315)</b> | <b>0.765(233900)</b> | <b>-0.064</b> | <b>0.008</b> |

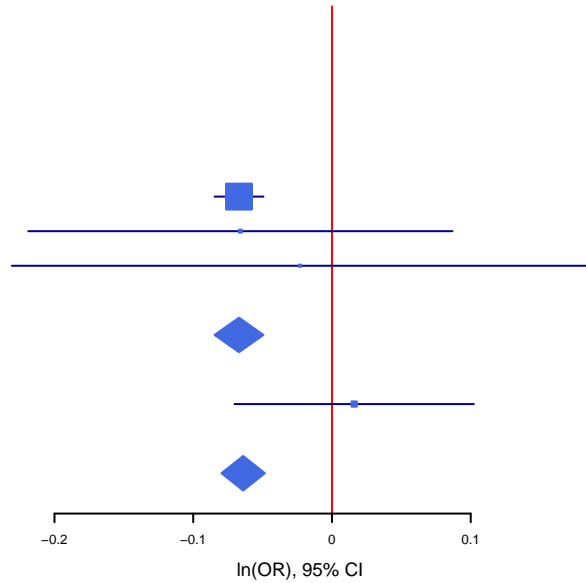

rs5943630                    A/C                    23:29276212  
 ++-                    het\_P:                    0.682    het\_I:                    0.0

|                                                    | ngt | info        | p_value         | f_ca(n)             | f_co(n)              | ln(OR)       | STDerr       |
|----------------------------------------------------|-----|-------------|-----------------|---------------------|----------------------|--------------|--------------|
| PGC_SCZ wave3 eur (incl. wave2)                    | -   | 1.46        | 1e-07           | 0.322(49866)        | 0.308(67582)         | 0.043        | 0.008        |
| PGC_SCZ wave3 asn (incl. wave2)                    | -   | 1.36        | 0.0103          | 0.516(11618)        | 0.499(14566)         | 0.041        | 0.016        |
| PGC_SCZ afram only                                 | -   | 1.00        | 0.305           | 0.526(6152)         | 0.526(3918)          | 0.038        | 0.027        |
| PGC_SCZ latino only                                | -   | 1.00        | 0.212           | 0.426(1234)         | 0.426(3090)          | 0.06         | 0.048        |
| PGC_SCZ trio only                                  | -   | 1.60        | 0.111           | 0.427(2918)         | 0.409(2918)          | 0.048        | 0.03         |
| <b>PGC_SCZ wave3 (incl. wave2)</b>                 | -   | <b>1.42</b> | <b>1.98e-10</b> | <b>0.377(71788)</b> | <b>0.354(92074)</b>  | <b>0.043</b> | <b>0.007</b> |
| Decode - Replication                               | -   | 1.00        | 0.321           | 0.309(1527)         | 0.308(141826)        | 0.04         | 0.041        |
| <b>PGC_SCZ wave3 (incl. wave2 and replication)</b> | -   | <b>1.16</b> | <b>1.13e-10</b> | <b>0.376(73315)</b> | <b>0.326(233900)</b> | <b>0.043</b> | <b>0.007</b> |

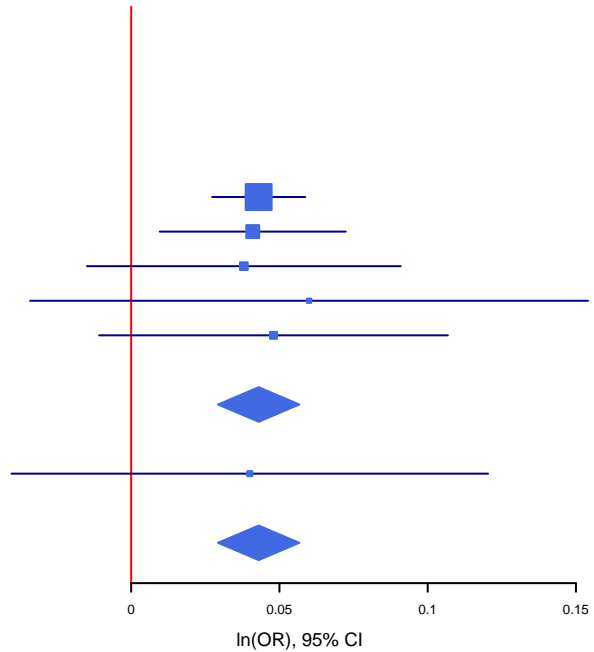

|                                                    | C/T |             | 23:5912903      |                    | het_P:               | 0.962        | het_I:       | 0.0 |
|----------------------------------------------------|-----|-------------|-----------------|--------------------|----------------------|--------------|--------------|-----|
|                                                    | ngt | info        | p_value         | f_ca(n)            |                      |              |              |     |
| PGC_SCZ wave3 eur (incl. wave2)                    | -   | 1.48        | 4.84e-07        | 0.406(49866)       | 0.387(67582)         | 0.038        | 0.008        |     |
| PGC_SCZ wave3 asn (incl. wave2)                    | -   | 1.39        | 0.0615          | 0.384(11618)       | 0.379(14566)         | 0.03         | 0.016        |     |
| PGC_SCZ afram only                                 | -   | 1.00        | 0.0771          | 0.491(6152)        | 0.491(3918)          | 0.047        | 0.027        |     |
| PGC_SCZ latino only                                | -   | 1.00        | 0.155           | 0.44(1234)         | 0.44(3090)           | 0.067        | 0.047        |     |
| PGC_SCZ trio only                                  | -   | 1.59        | 0.0463          | 0.417(2918)        | 0.394(2918)          | 0.06         | 0.03         |     |
| <b>PGC_SCZ wave3 (incl. wave2)</b>                 | -   | <b>1.43</b> | <b>1.67e-09</b> | <b>0.41(71788)</b> | <b>0.392(92074)</b>  | <b>0.039</b> | <b>0.006</b> |     |
| Decode - Replication                               | -   | 1.00        | 0.225           | 0.389(1527)        | 0.396(141826)        | 0.044        | 0.036        |     |
| <b>PGC_SCZ wave3 (incl. wave2 and replication)</b> | -   | <b>1.17</b> | <b>6.38e-10</b> | <b>0.41(73315)</b> | <b>0.395(233900)</b> | <b>0.039</b> | <b>0.006</b> |     |

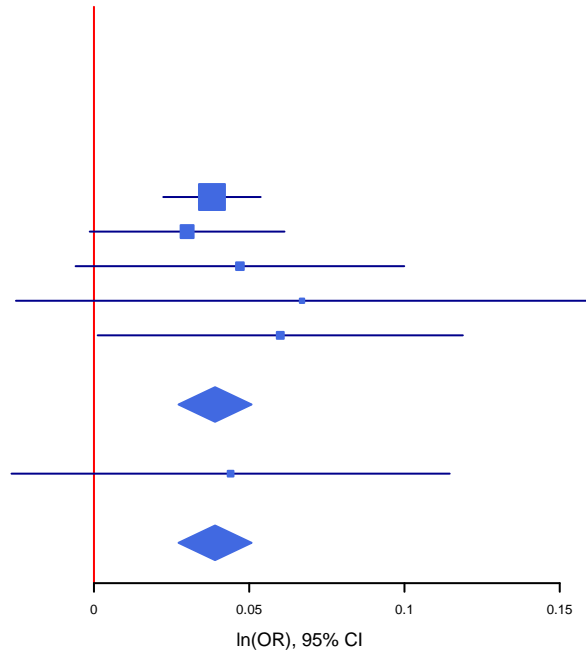

rs12840919                    **G/A**                    **23:12202445**  
 ++-                    het\_P:                    0.479    het\_I:                    0.0

|                                                    | ngt | info        | p_value        | f_ca(n)             | f_co(n)              | ln(OR)        | STDerr       |
|----------------------------------------------------|-----|-------------|----------------|---------------------|----------------------|---------------|--------------|
| PGC_SCZ wave3 eur (incl. wave2)                    | -   | 1.49        | 2.82e-06       | 0.863(49866)        | 0.872(67582)         | -0.052        | 0.011        |
| PGC_SCZ wave3 asn (incl. wave2)                    | -   | 1.40        | 0.00293        | 0.779(11618)        | 0.794(14566)         | -0.056        | 0.019        |
| PGC_SCZ afram only                                 | -   | 1.00        | 0.695          | 0.992(6152)         | 0.992(3918)          | -0.041        | 0.104        |
| PGC_SCZ latino only                                | -   | 1.00        | 0.258          | 0.852(1234)         | 0.852(3090)          | 0.087         | 0.077        |
| PGC_SCZ trio only                                  | -   | 1.60        | 0.078          | 0.811(2918)         | 0.827(2918)          | -0.067        | 0.038        |
| <b>PGC_SCZ wave3 (incl. wave2)</b>                 | -   | <b>1.43</b> | <b>1.4e-08</b> | <b>0.858(71788)</b> | <b>0.863(92074)</b>  | <b>-0.052</b> | <b>0.009</b> |
| Decode - Replication                               | -   | 1.00        | 0.877          | 0.872(1527)         | 0.88(141826)         | 0.008         | 0.051        |
| <b>PGC_SCZ wave3 (incl. wave2 and replication)</b> | -   | <b>1.17</b> | <b>2.8e-08</b> | <b>0.858(73315)</b> | <b>0.873(233900)</b> | <b>-0.05</b>  | <b>0.009</b> |

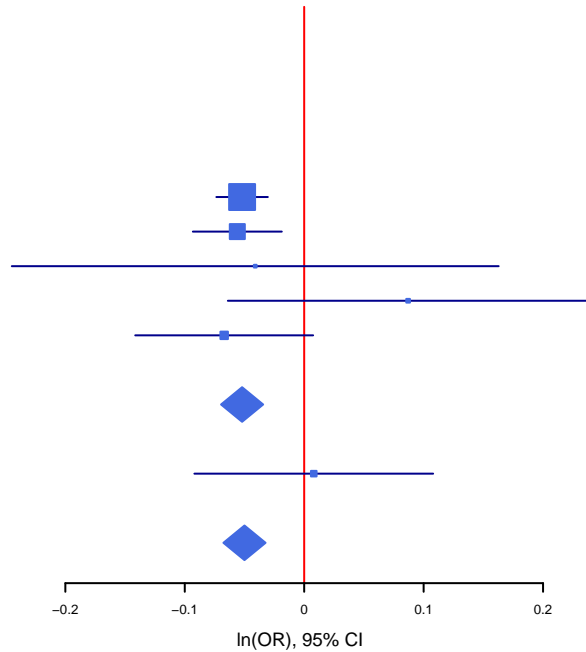

Supplement: NIHMS1824605-supplement-Fig_S2b.pdf [file NIHMS1824605-supplement-Fig_S2b.pdf]
