# Supplementary material
Source: PubMed Central journal article supplement (PMC9392466)

chr2:193372340–194329340; wave2; 50kb flank

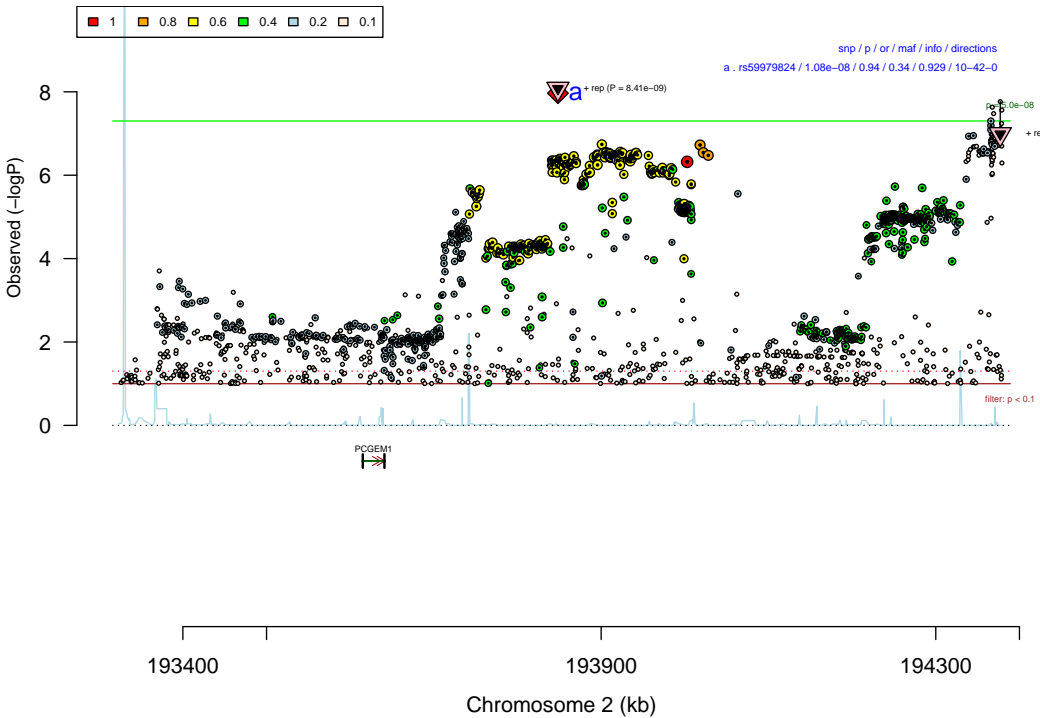

chr2:193372340–194329340; wave3; 50kb flank

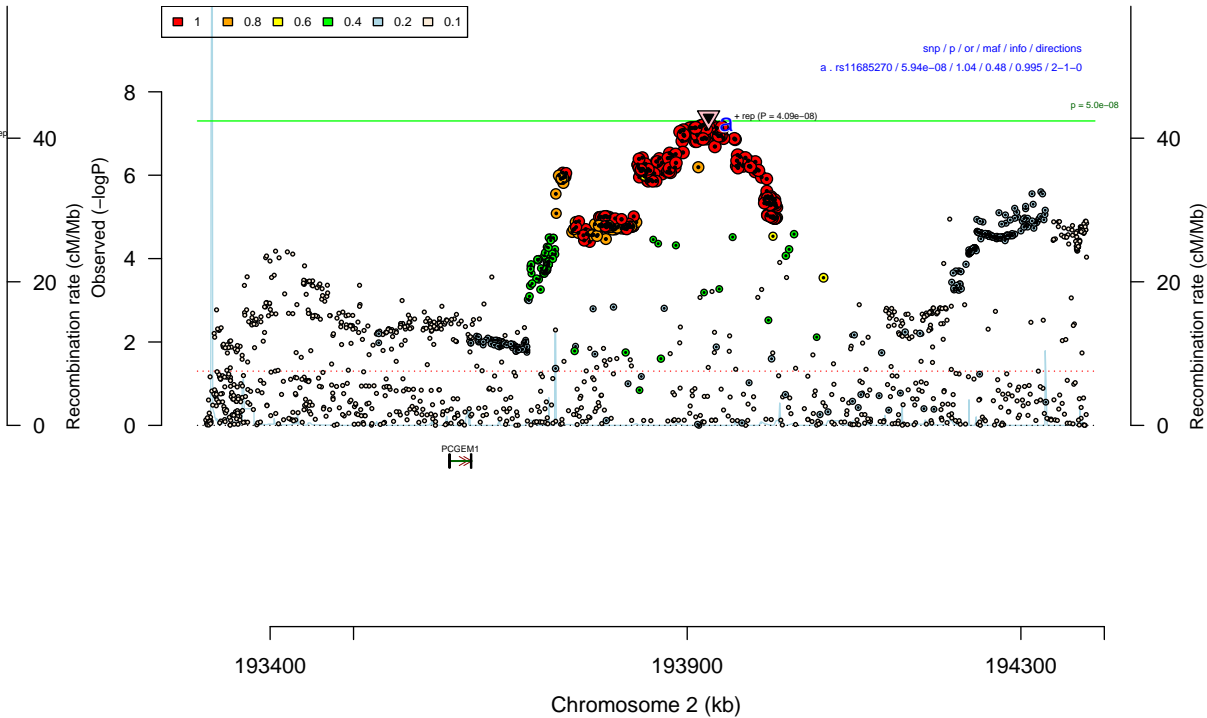

chr2:193372340–194329340; wave2; 2mb flank

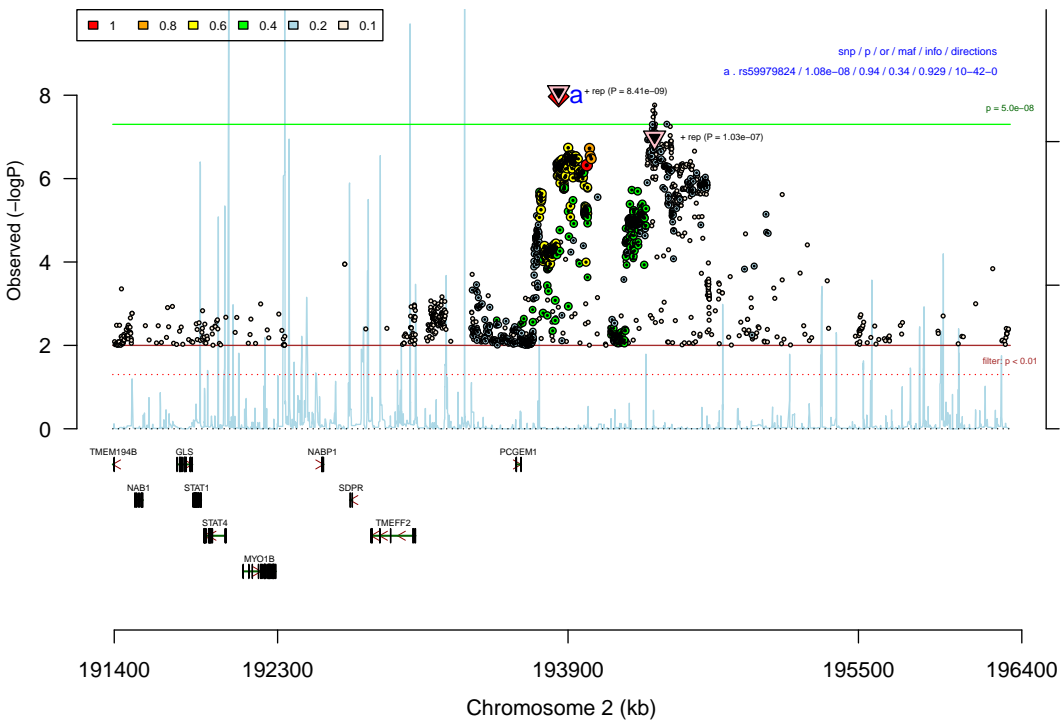

chr2:193372340–194329340; wave3; 2mb flank

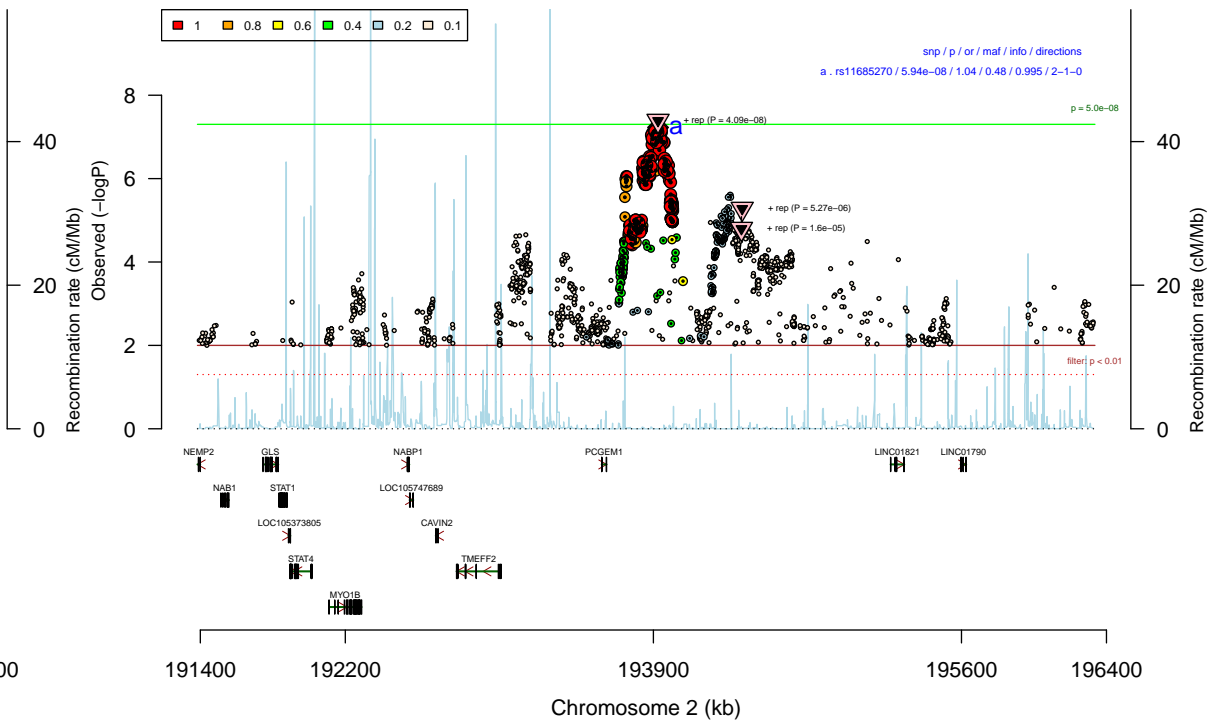

chr19:30972923–31052323; wave2; 50kb flank

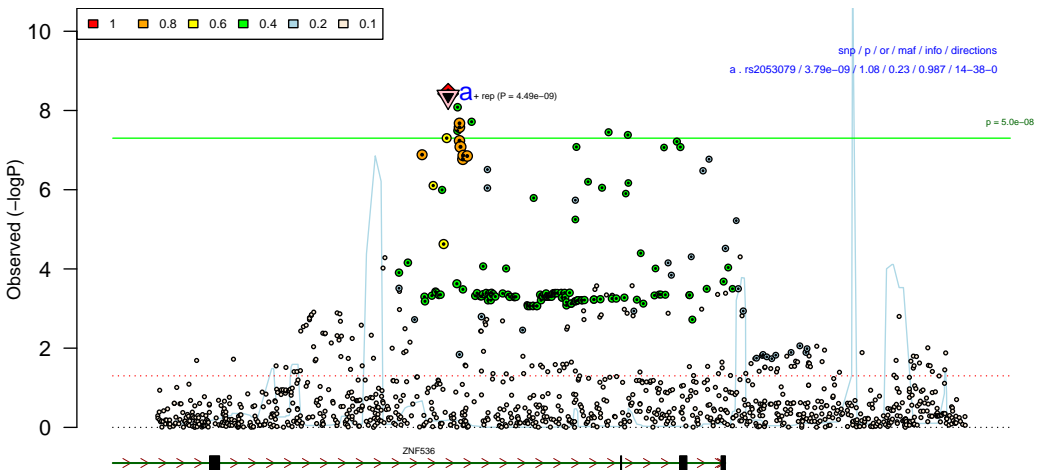

31000 31100  
Chromosome 19 (kb)

database: gwascatalog Nov\_2017.tp.txt, refGene.tst.Aug\_2013.txt.out

chr19:30972923–31052323; wave3; 50kb flank

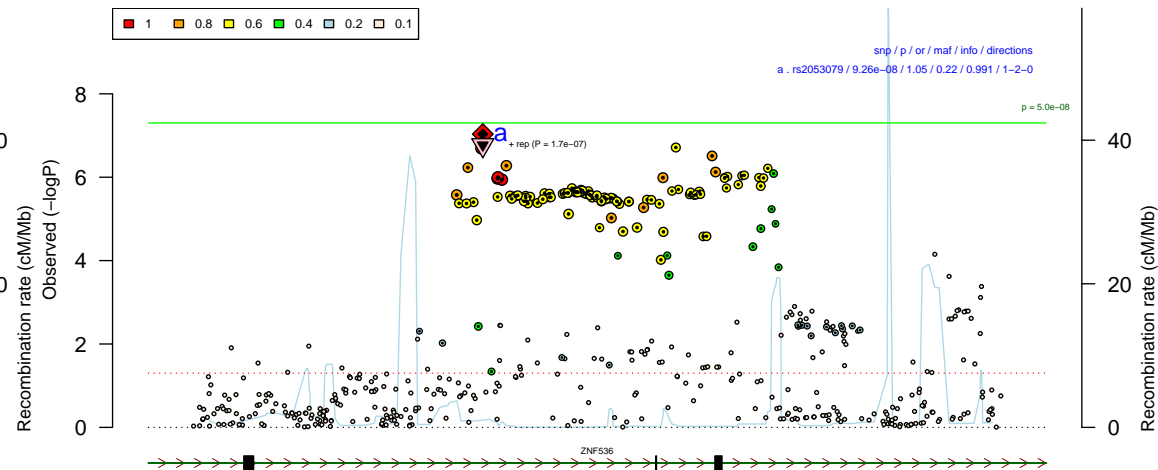

31000 31100  
Chromosome 19 (kb)

database: gwascatalog Nov\_2017.tp.txt, refGene.tst.Aug\_2017.out

chr19:30972923–31052323; wave2; 2mb flank

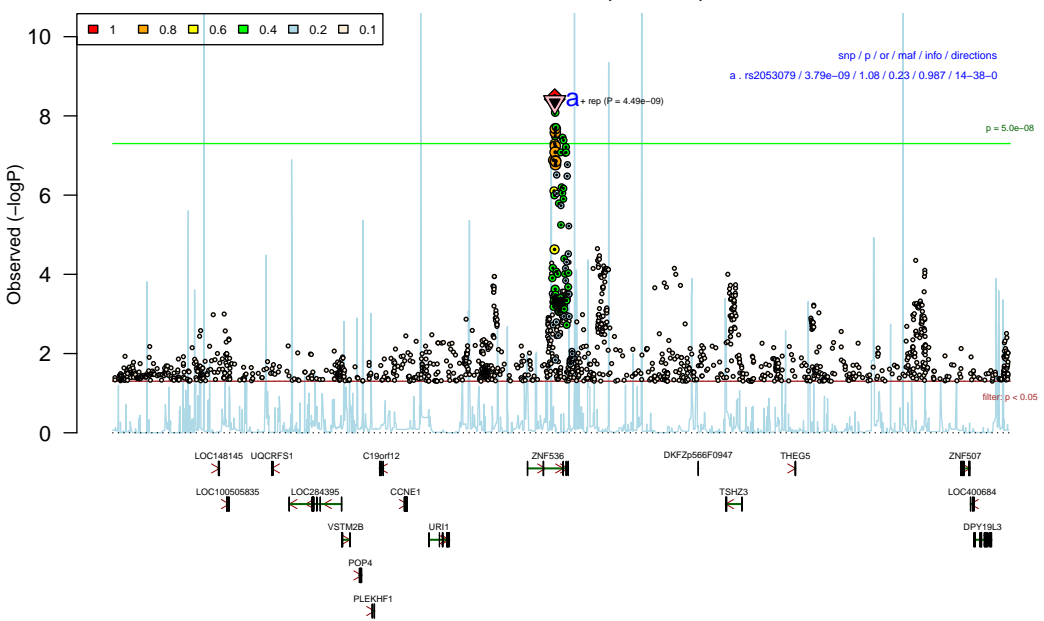

29000 29600 31000 32400 33000  
Chromosome 19 (kb)

database: gwascatalog Nov\_2017.tp.txt, refGene.tst.Aug\_2013.txt.out

chr19:30972923–31052323; wave3; 2mb flank

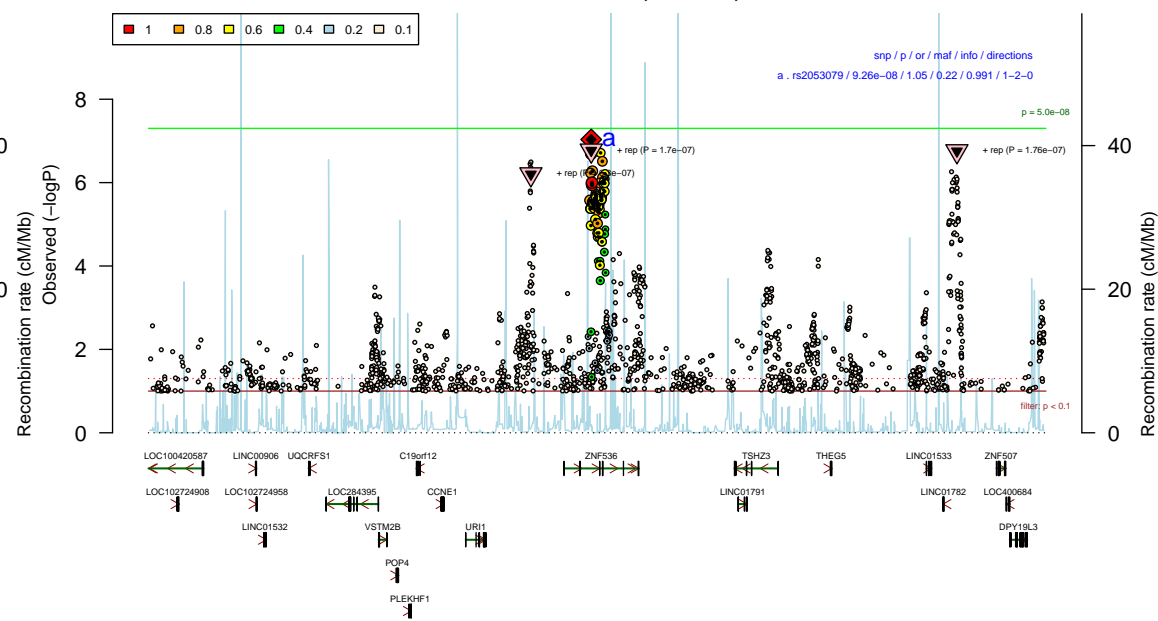

29000 29600 31000 32400 33000  
Chromosome 19 (kb)

database: gwascatalog Nov\_2017.tp.txt, refGene.tst.Aug\_2017.out

chr12:92243186-92394786; wave2; 50kb flank

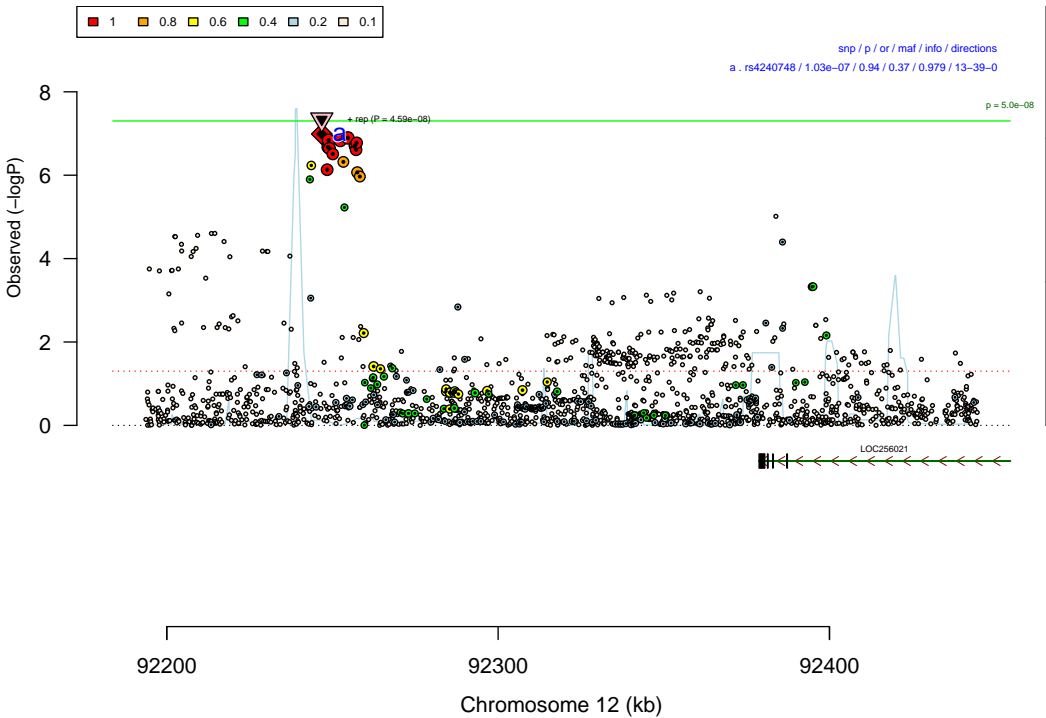

chr12:92243186-92394786; wave3; 50kb flank

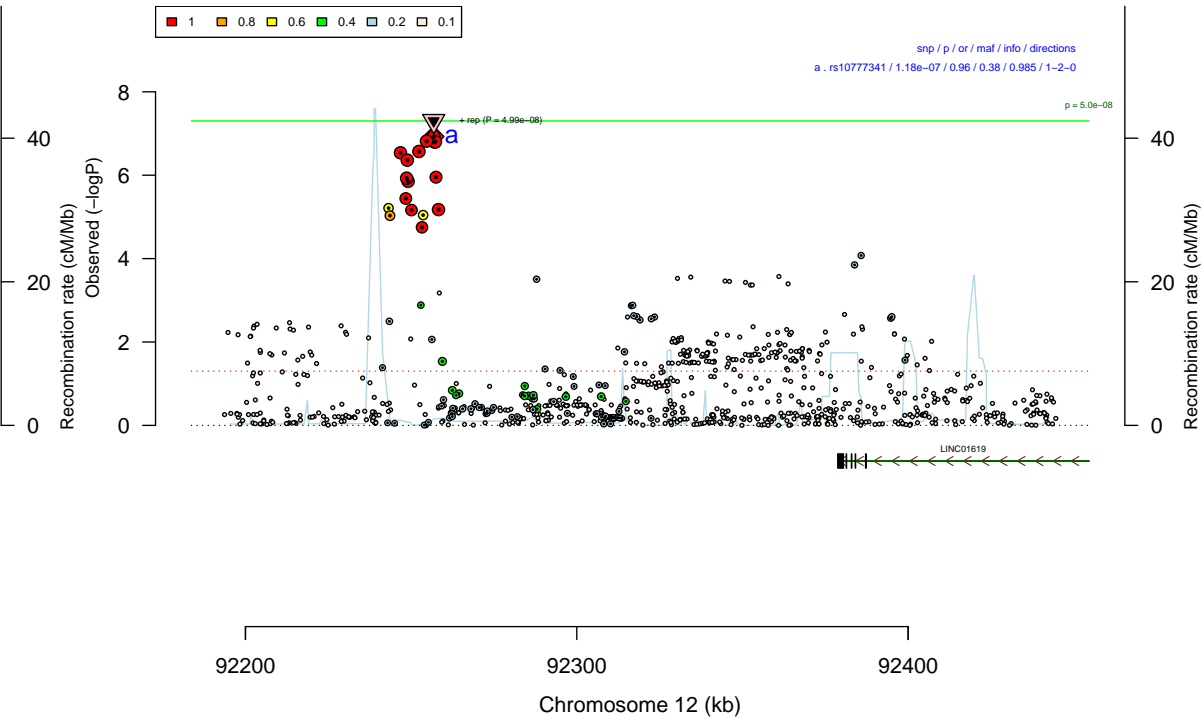

chr12:92243186-92394786; wave2; 2mb flank

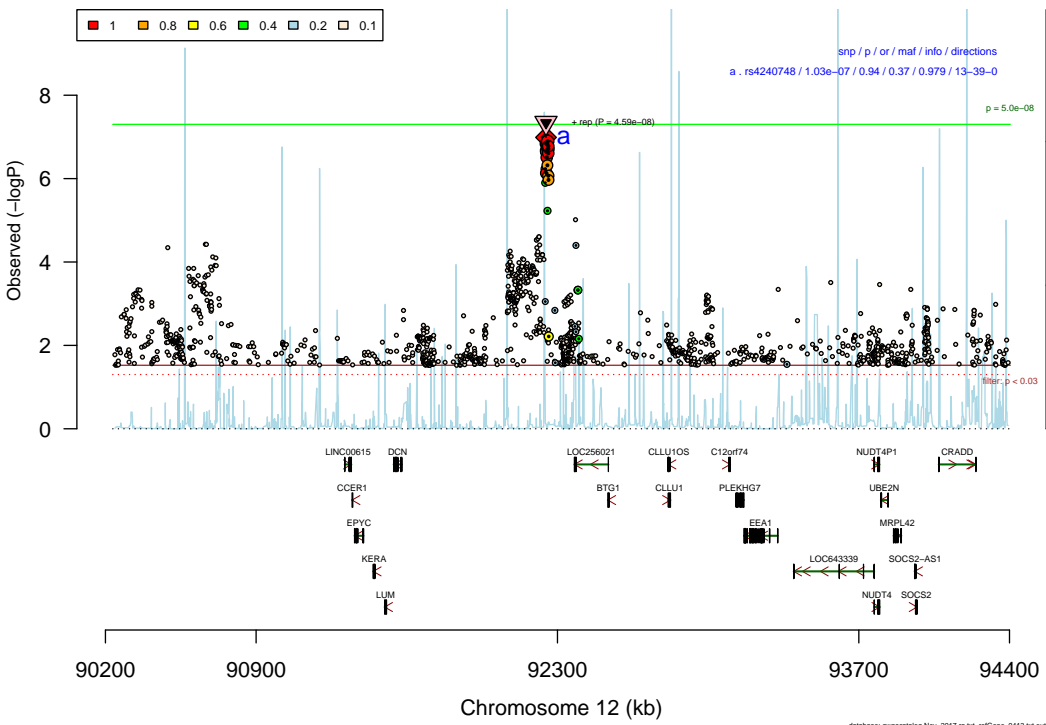

chr12:92243186-92394786; wave3; 2mb flank

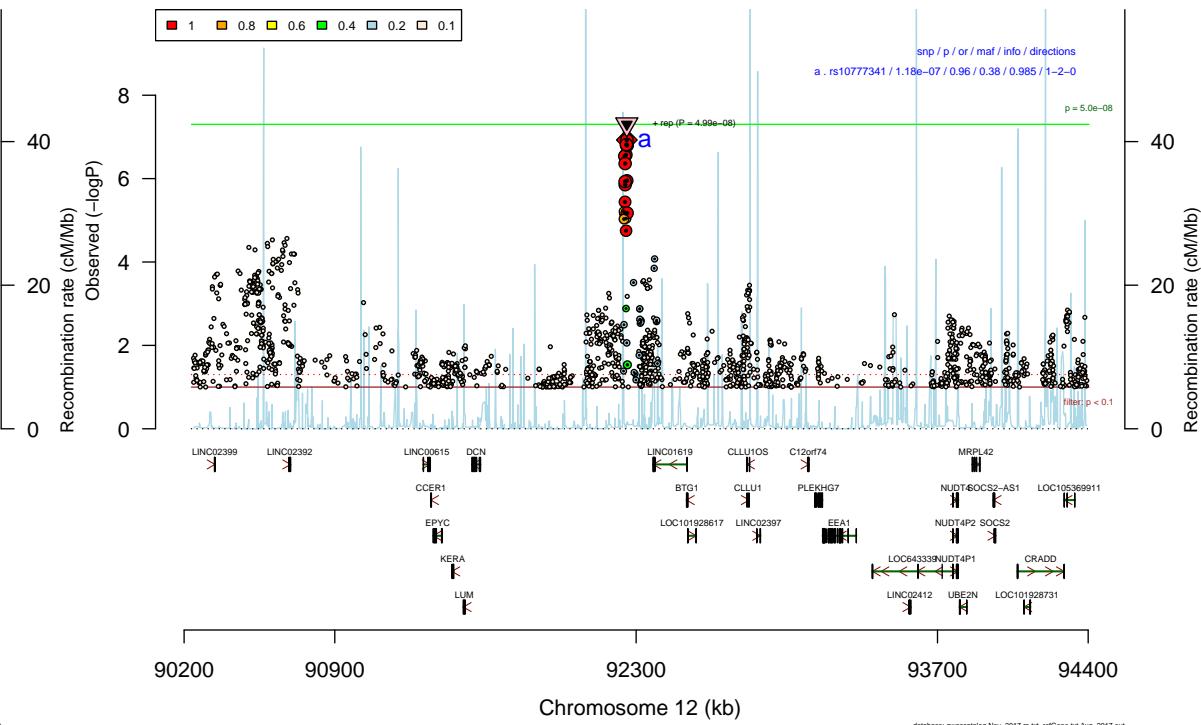

chr9:84497941–85129941; wave2; 50kb flank

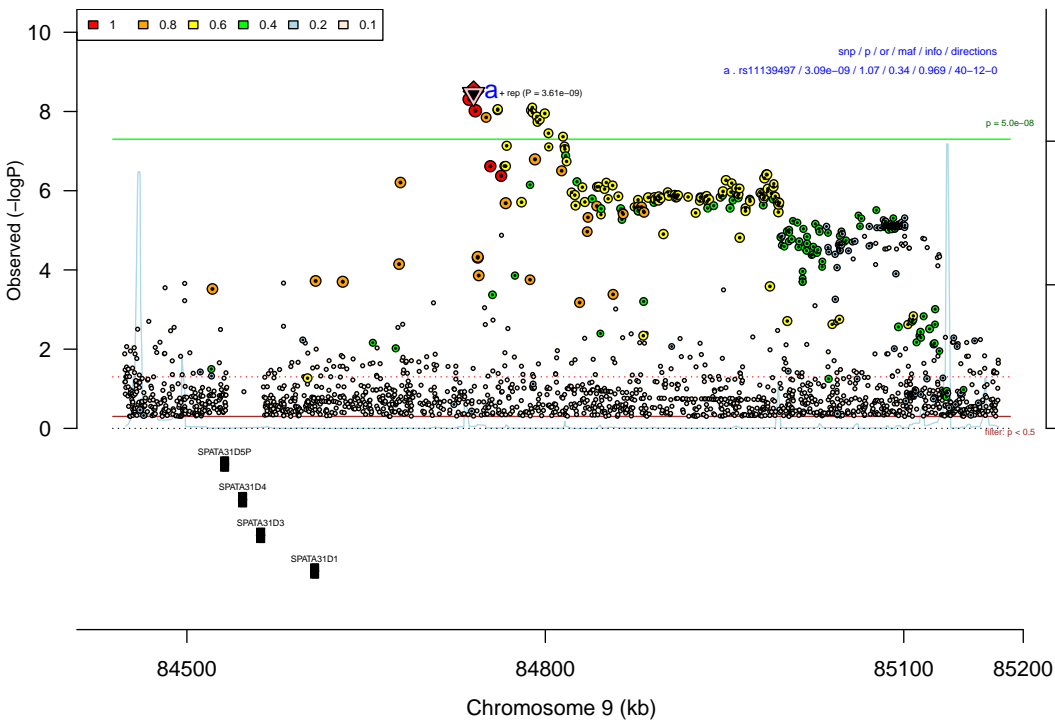

chr9:84497941–85129941; wave3; 50kb flank

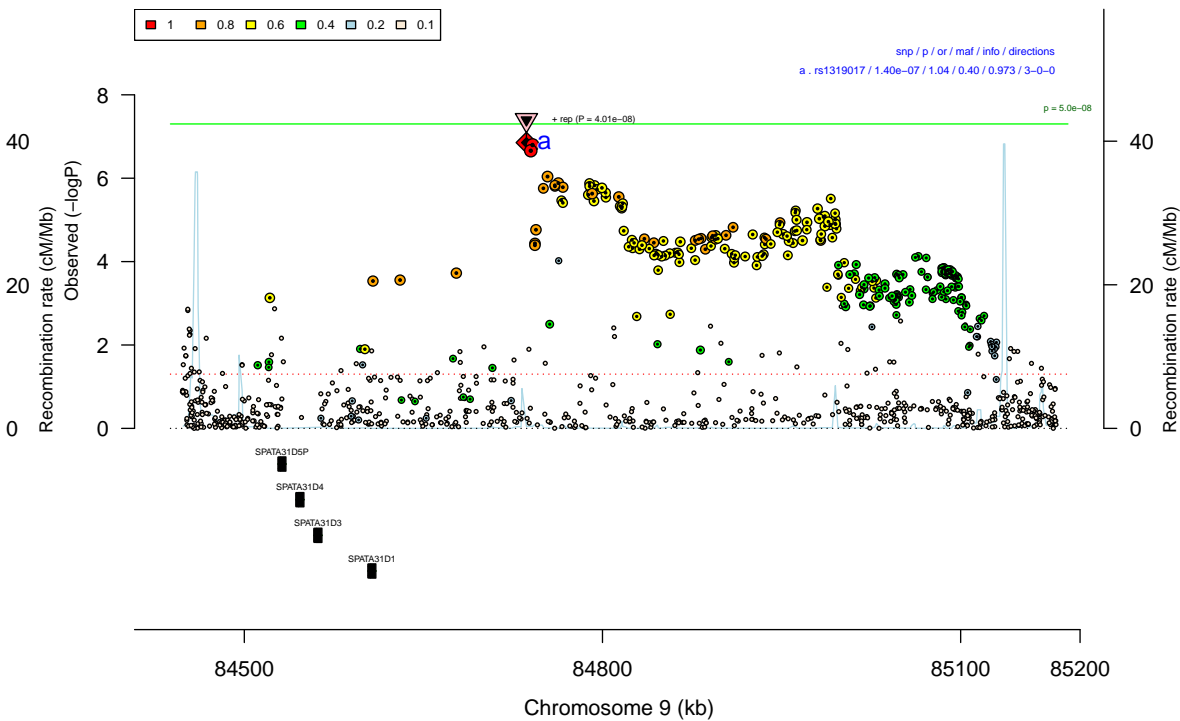

chr9:84497941–85129941; wave2; 2mb flank

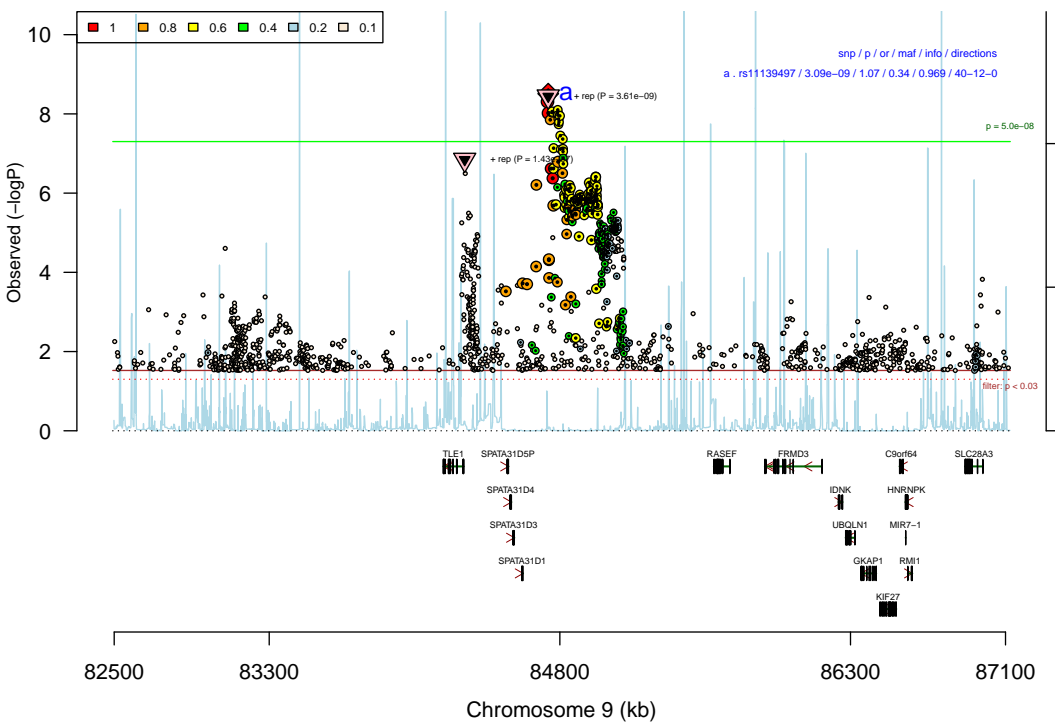

chr9:84497941–85129941; wave3; 2mb flank

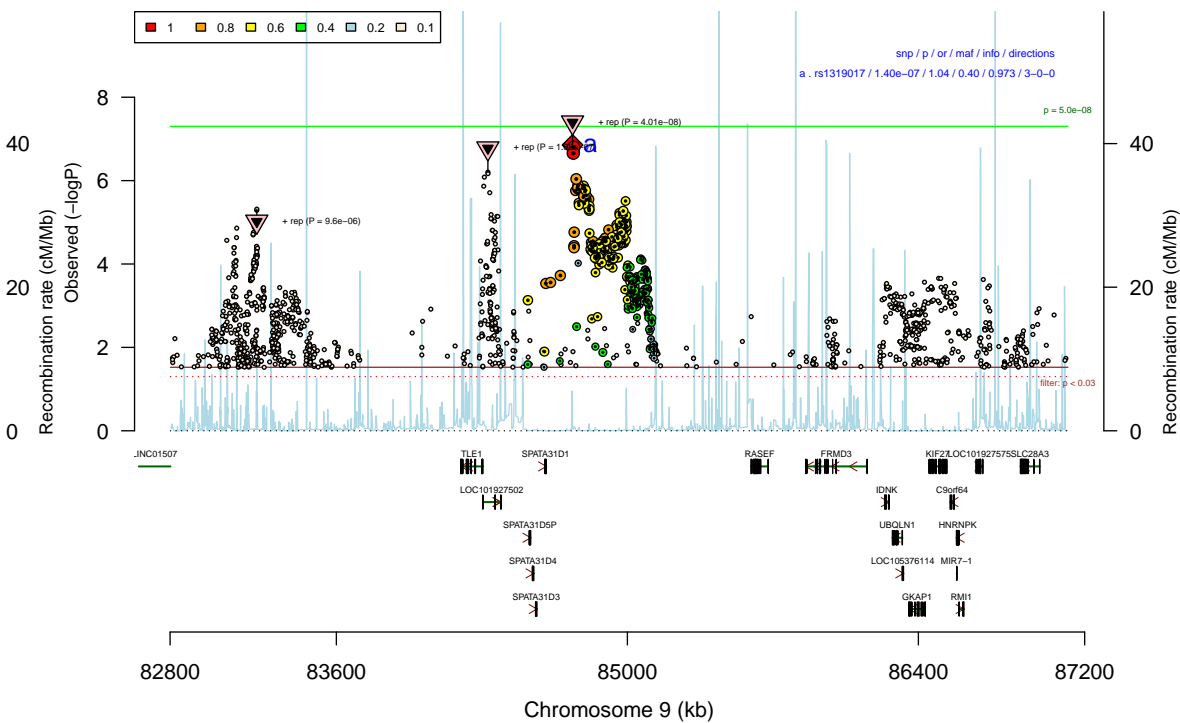

chr5:152787456–152899656; wave2; 50kb flank

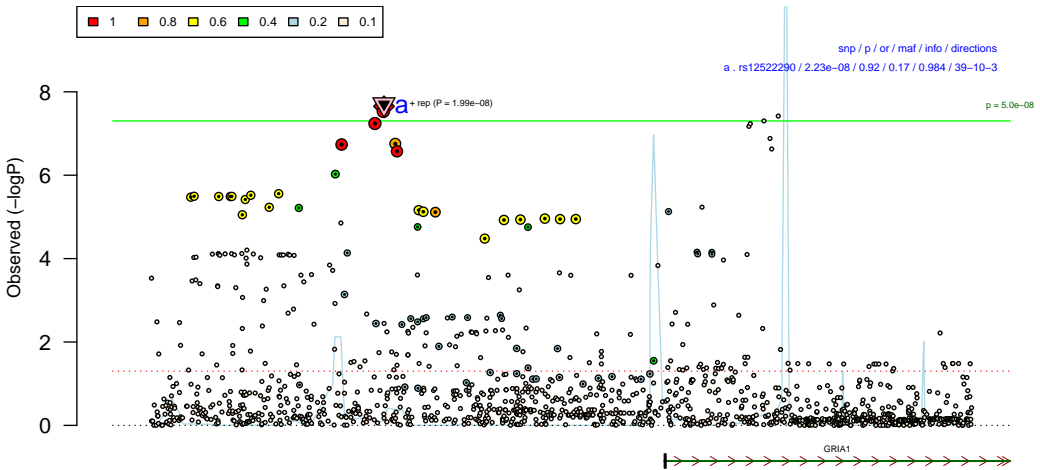

152800 152900

Chromosome 5 (kb)

database: gwascatlog Nov\_2017.fp.txt, refGene.tst.Aug\_2017.out

chr5:152787456–152899656; wave3; 50kb flank

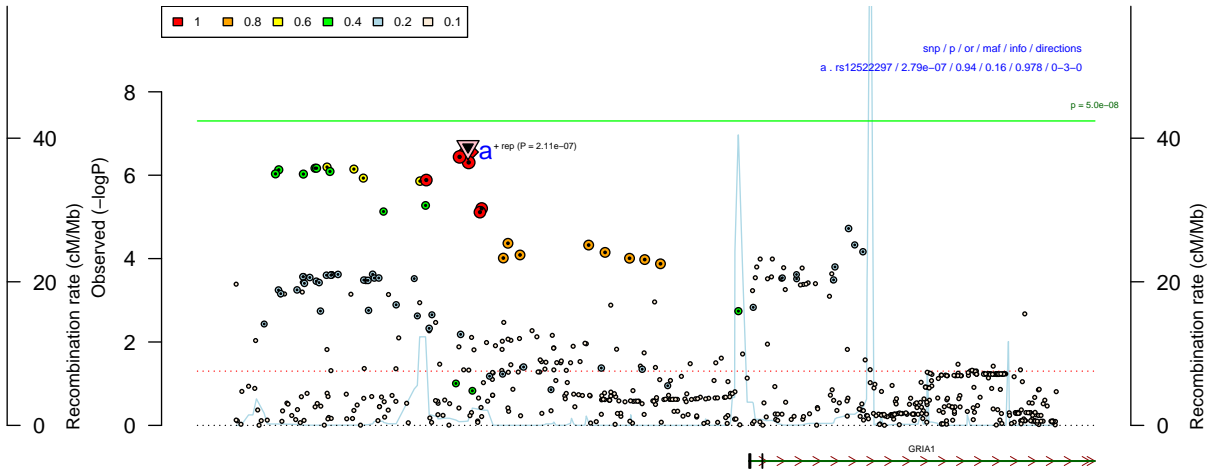

152800 152900

Chromosome 5 (kb)

database: gwascatlog Nov\_2017.fp.txt, refGene.tst.Aug\_2017.out

chr5:152787456–152899656; wave2; 2mb flank

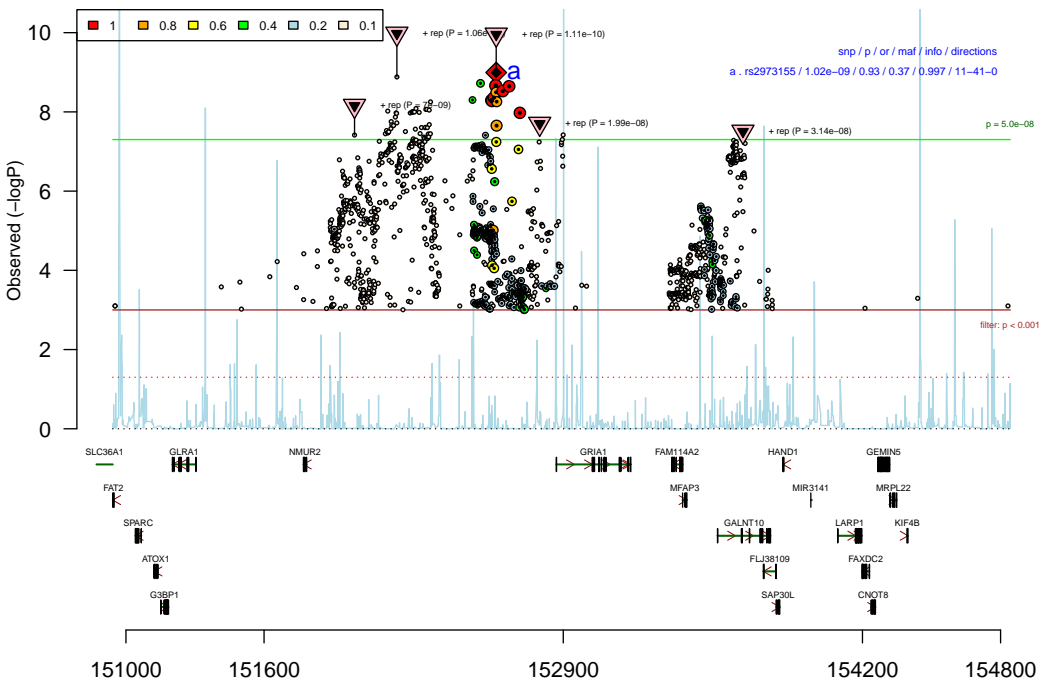

database: gwascatlog Nov\_2017.fp.txt, refGene.tst.Aug\_2017.out

chr5:152787456–152899656; wave3; 2mb flank

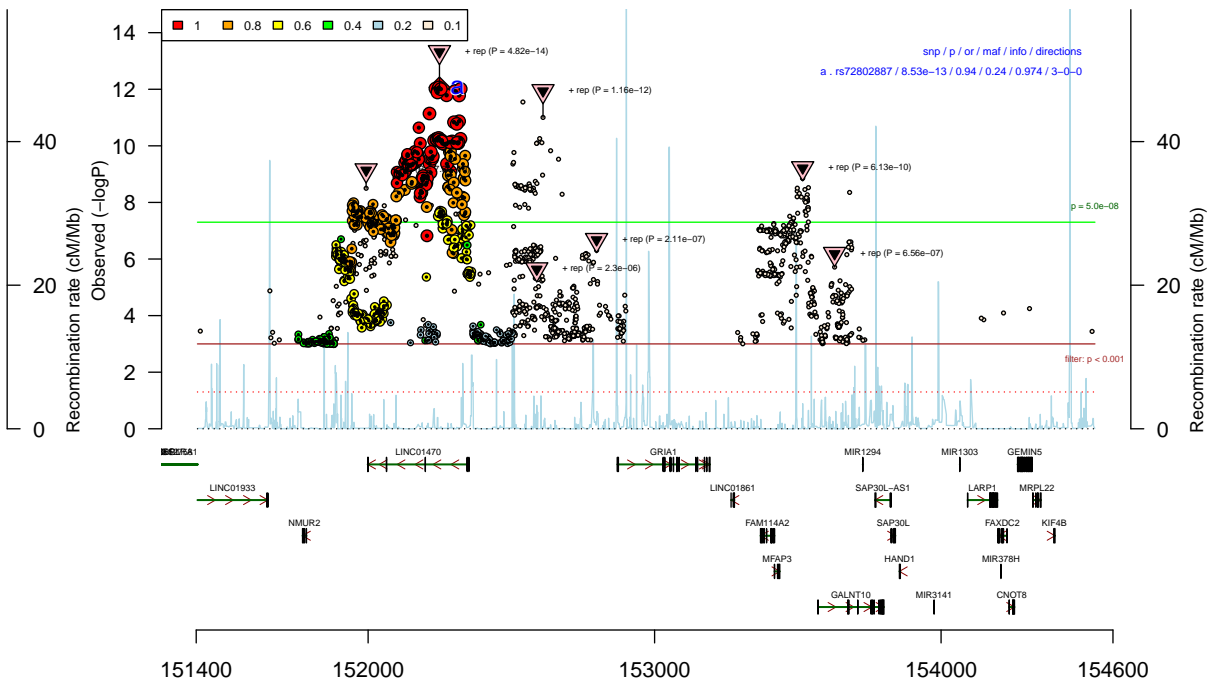

database: gwascatlog Nov\_2017.fp.txt, refGene.tst.Aug\_2017.out

chr1:207882583–208039683; wave2; 50kb flank

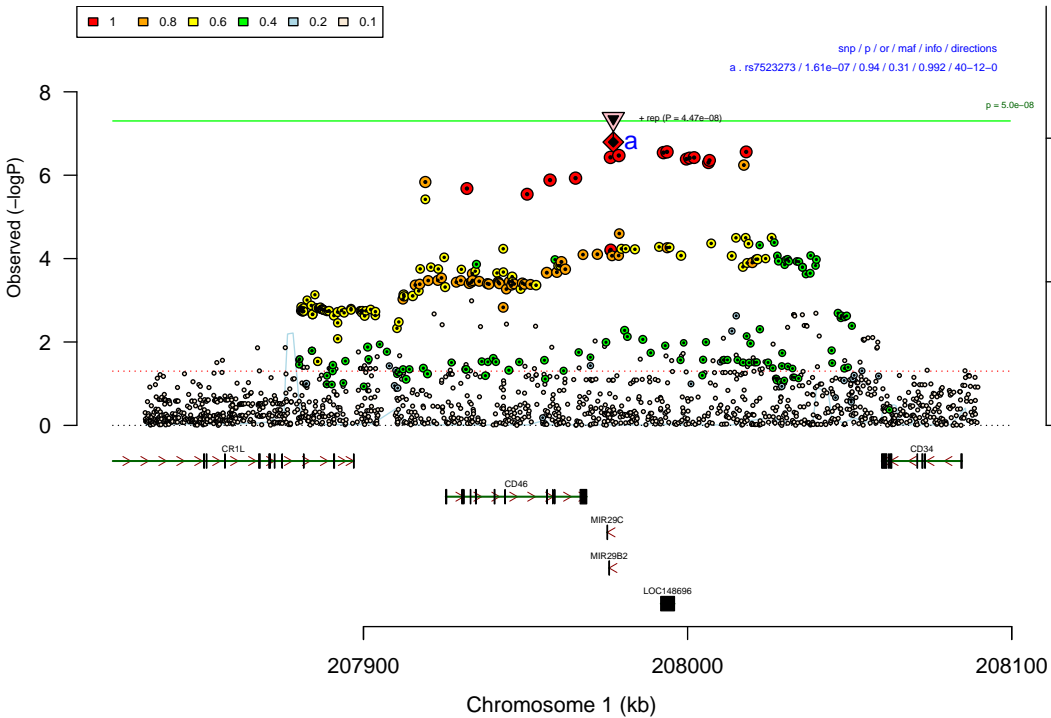

chr1:207882583–208039683; wave3; 50kb flank

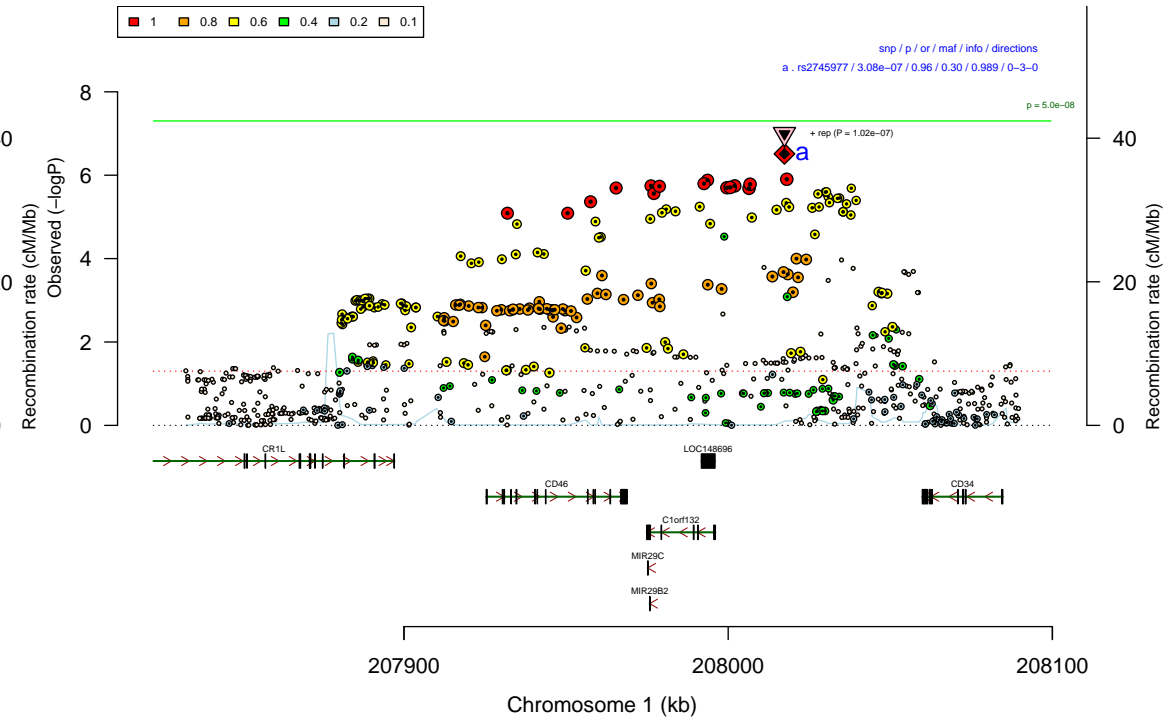

chr1:207882583–208039683; wave2; 2mb flank

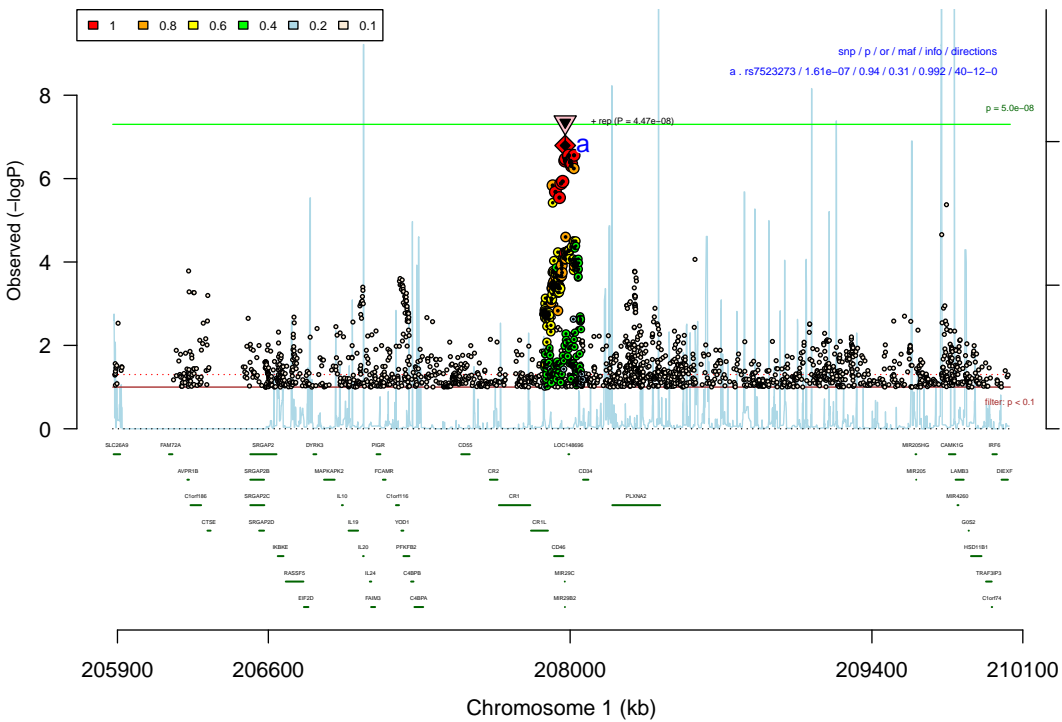

chr1:207882583–208039683; wave3; 2mb flank

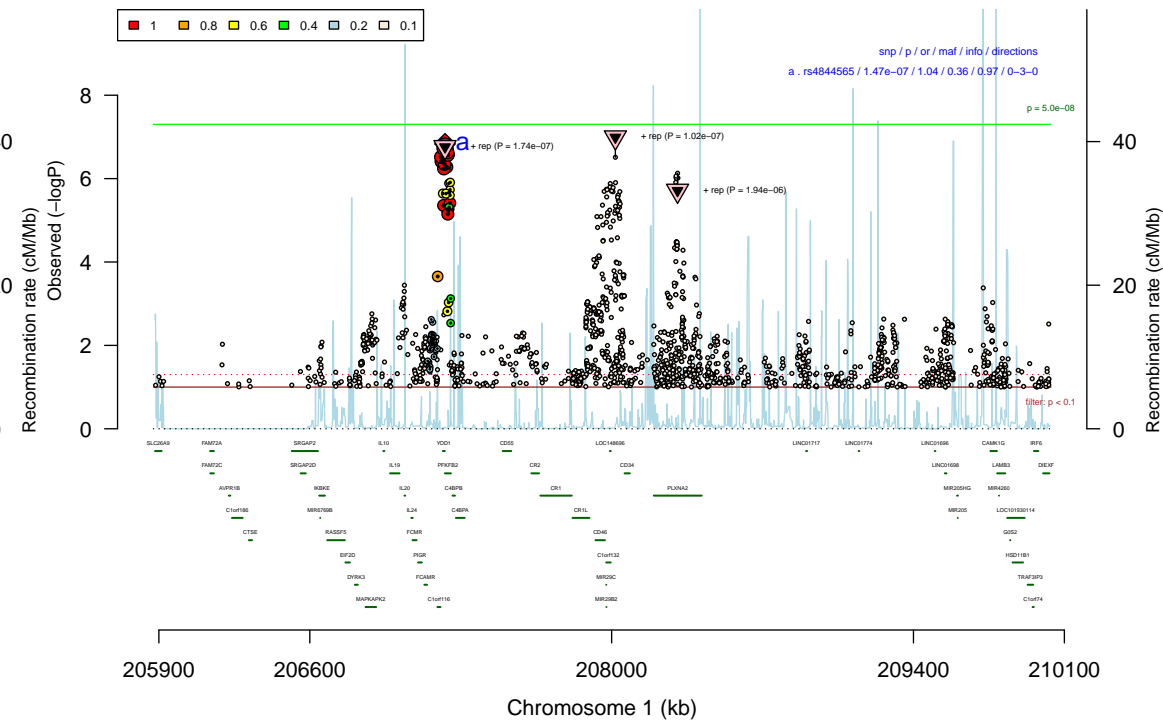

chr1:243454105–243555105; wave2; 50kb flank

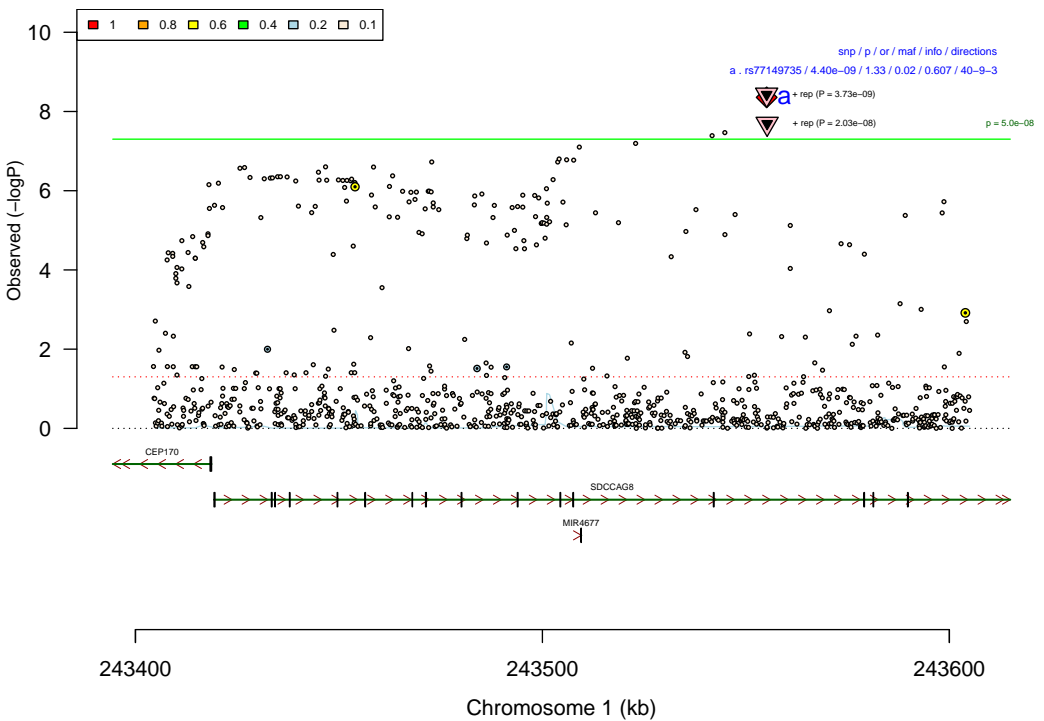

chr1:243454105–243555105; wave3; 50kb flank

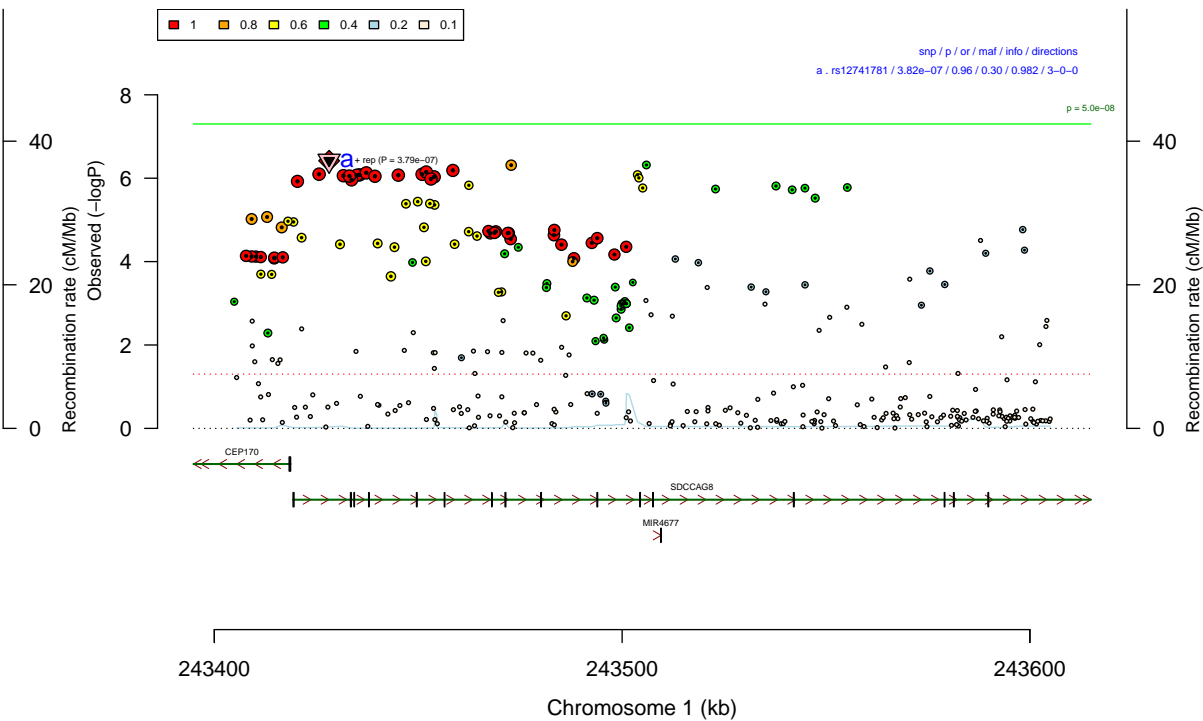

chr1:243454105–243555105; wave2; 2mb flank

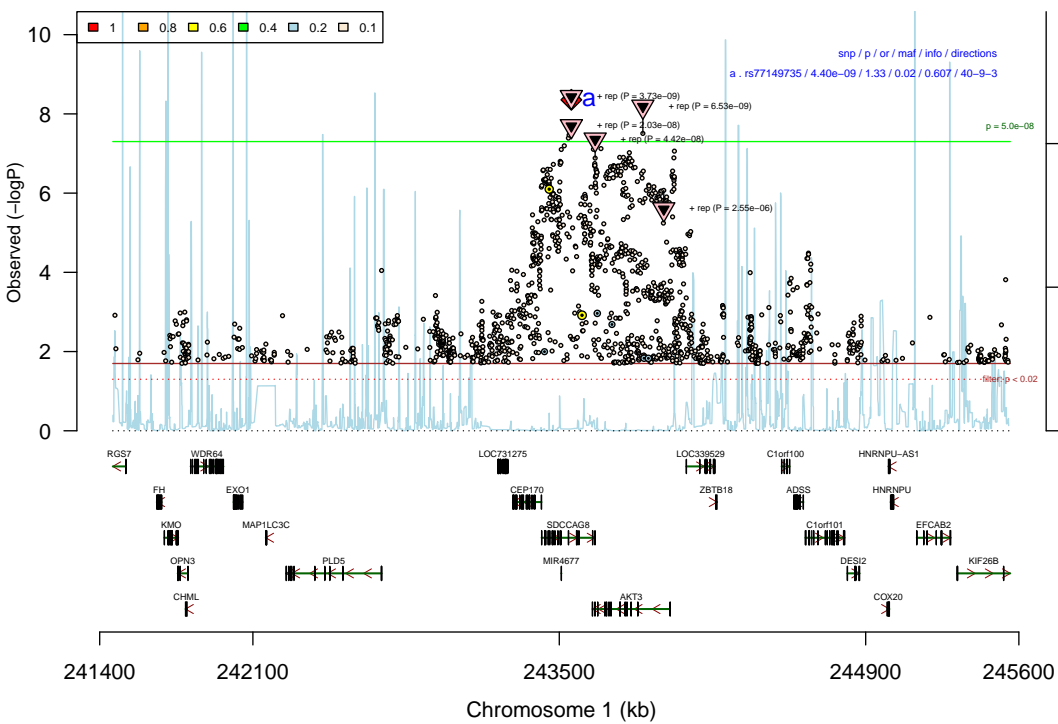

chr1:243454105–243555105; wave3; 2mb flank

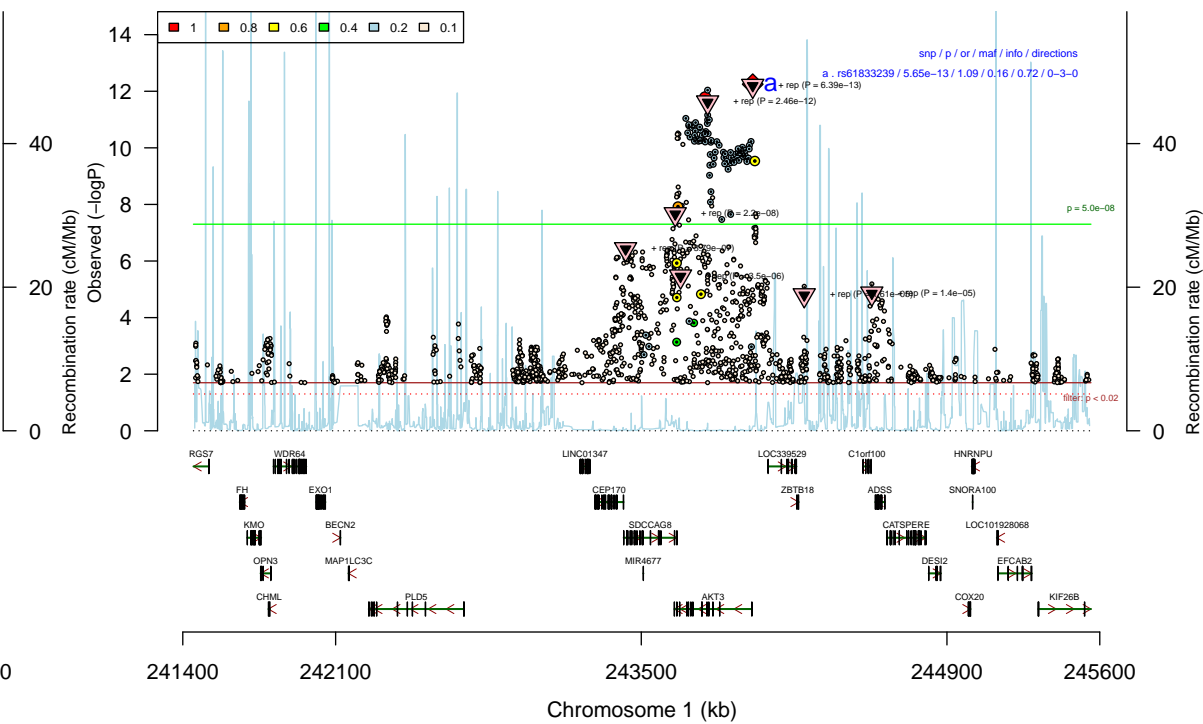

chr17:17646402–18036302; wave2; 50kb flank

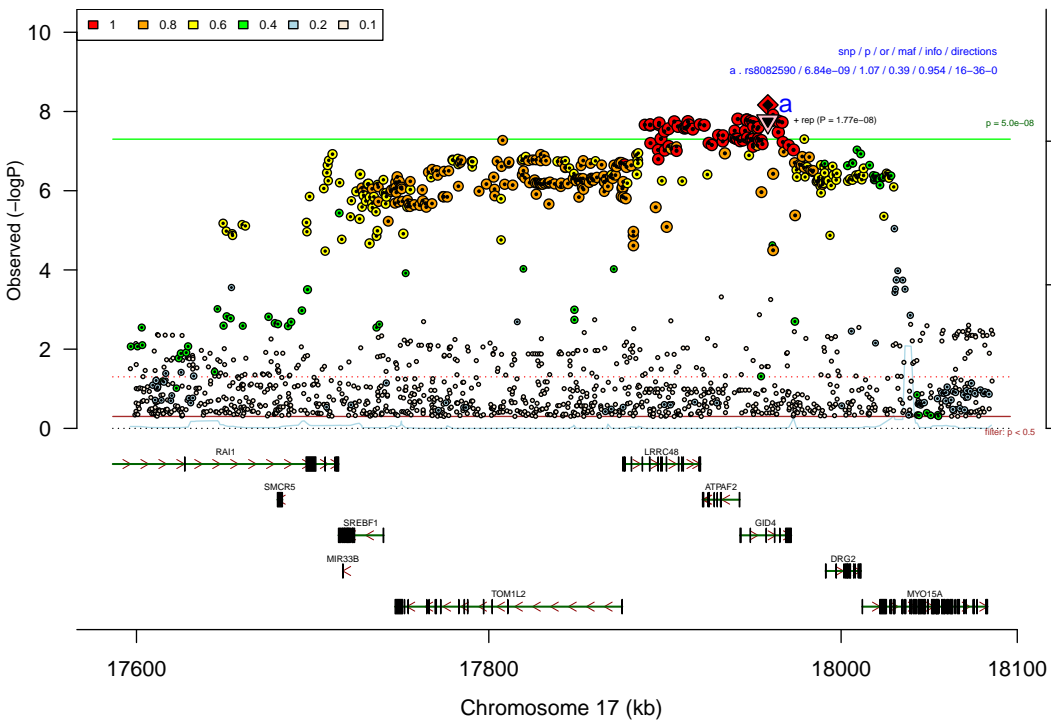

chr17:17646402–18036302; wave3; 50kb flank

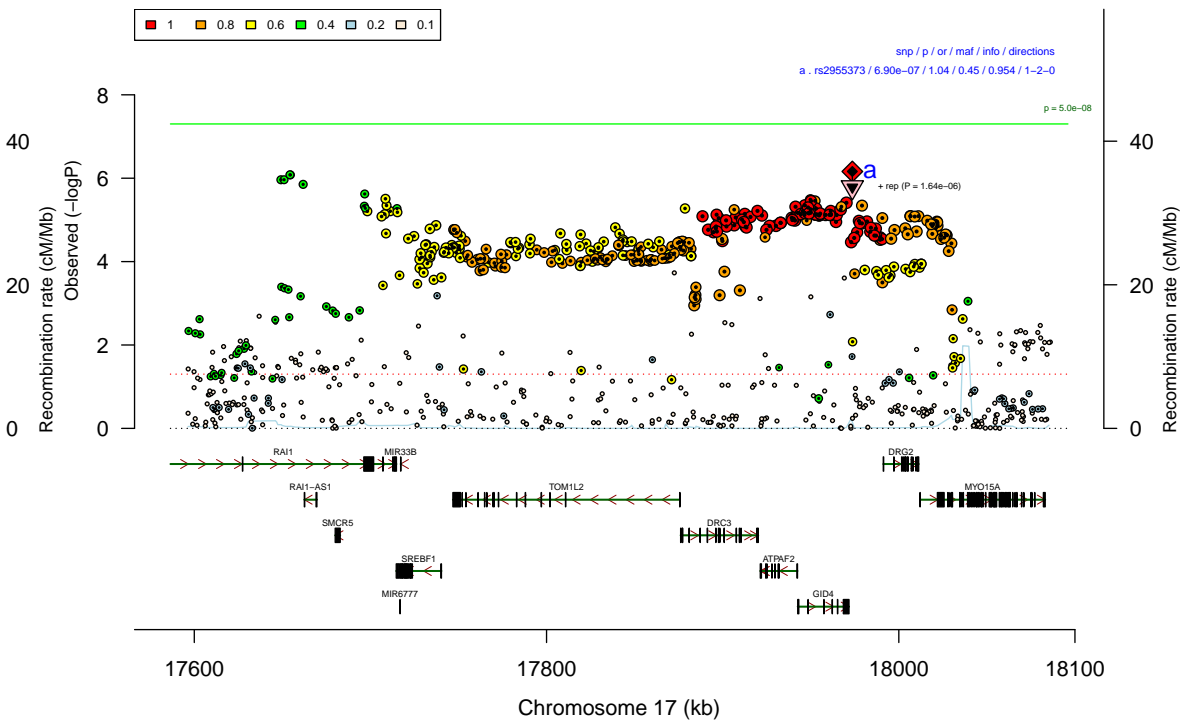

chr17:17646402–18036302; wave2; 2mb flank

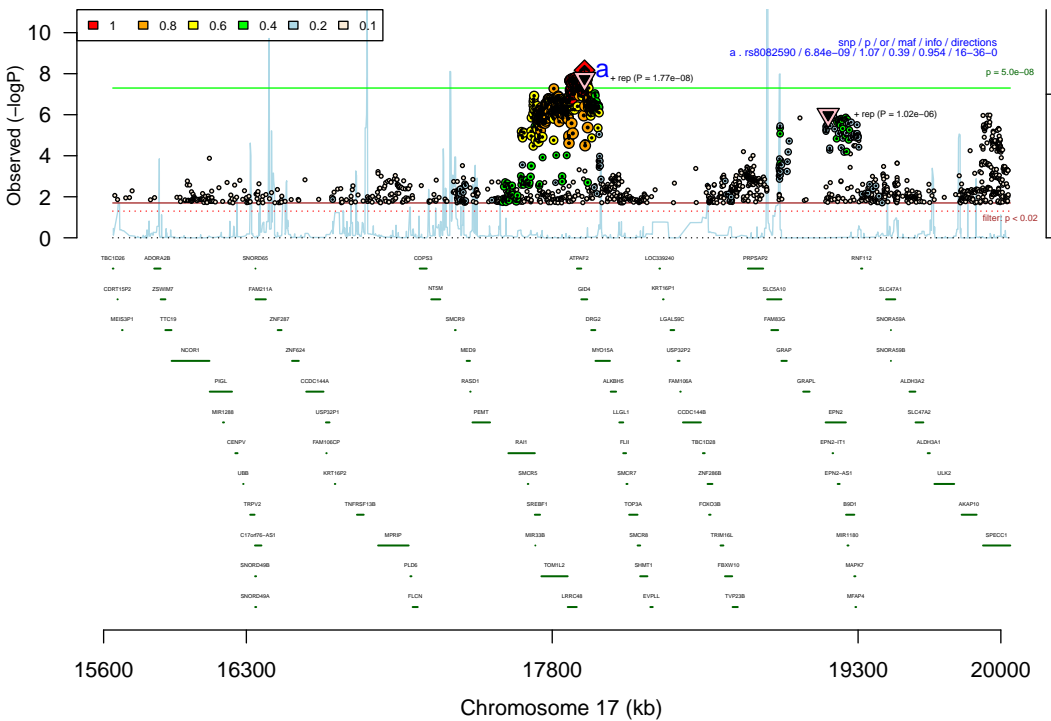

chr17:17646402–18036302; wave3; 2mb flank

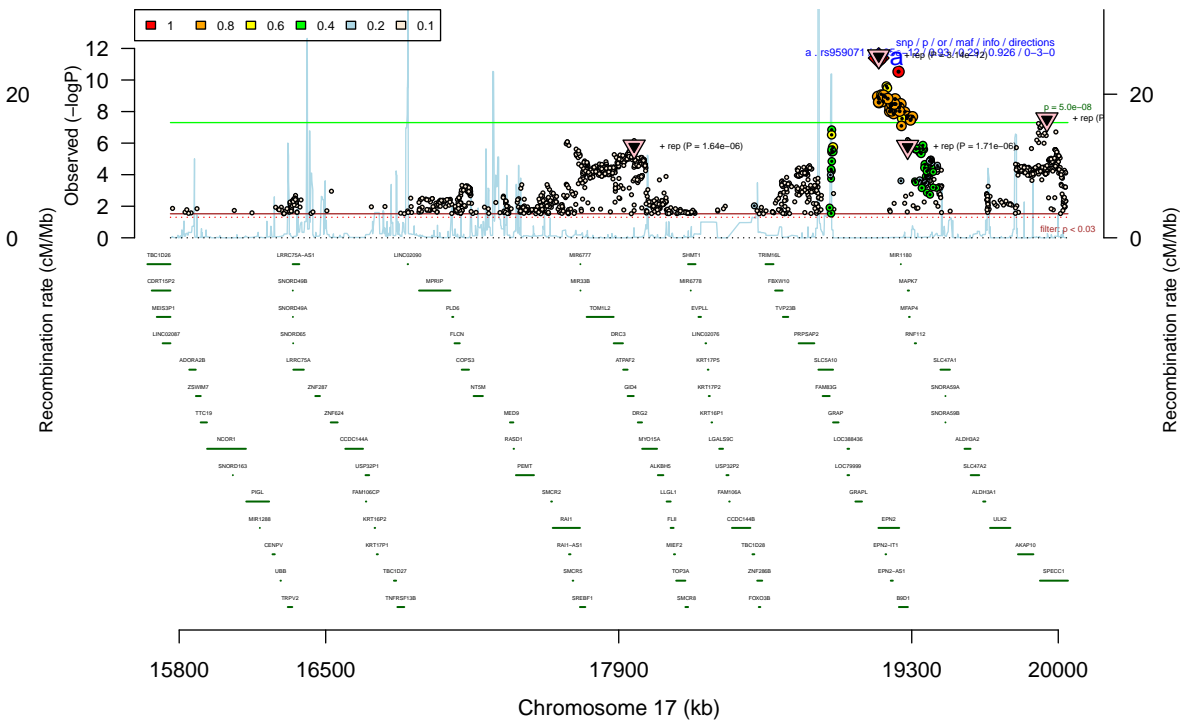



chr15:70573472–70633672; wave2; 50kb flank

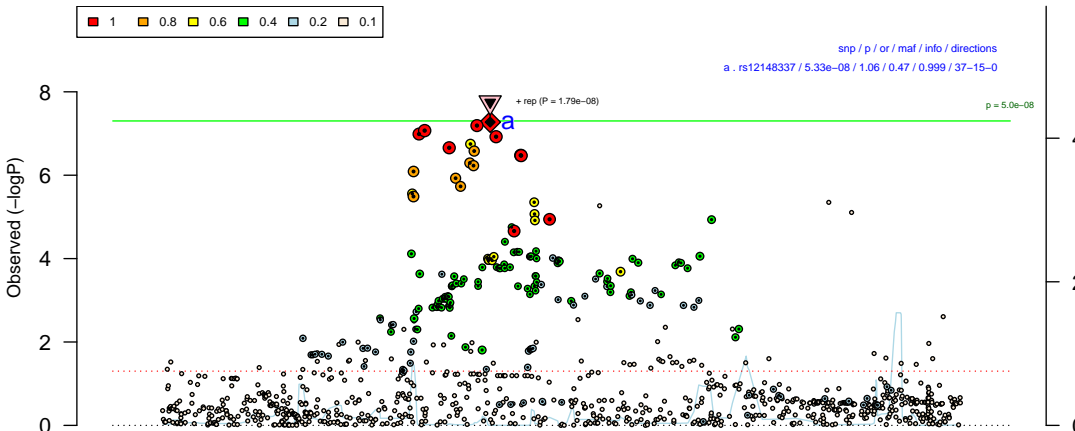

70600 70700  
Chromosome 15 (kb)  
database: gwascatlog Nov\_2017.tp.txt, refGene.tst.Aug\_2013.txt.out

chr15:70573472–70633672; wave3; 50kb flank

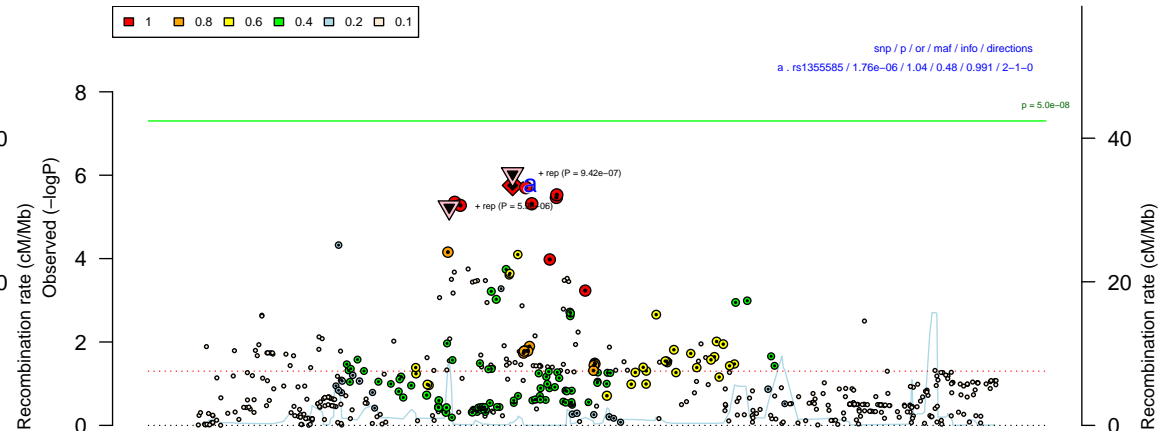

70600 70700  
Chromosome 15 (kb)  
database: gwascatlog Nov\_2017.tp.txt, refGene.tst.Aug\_2017.out

chr15:70573472–70633672; wave2; 2mb flank

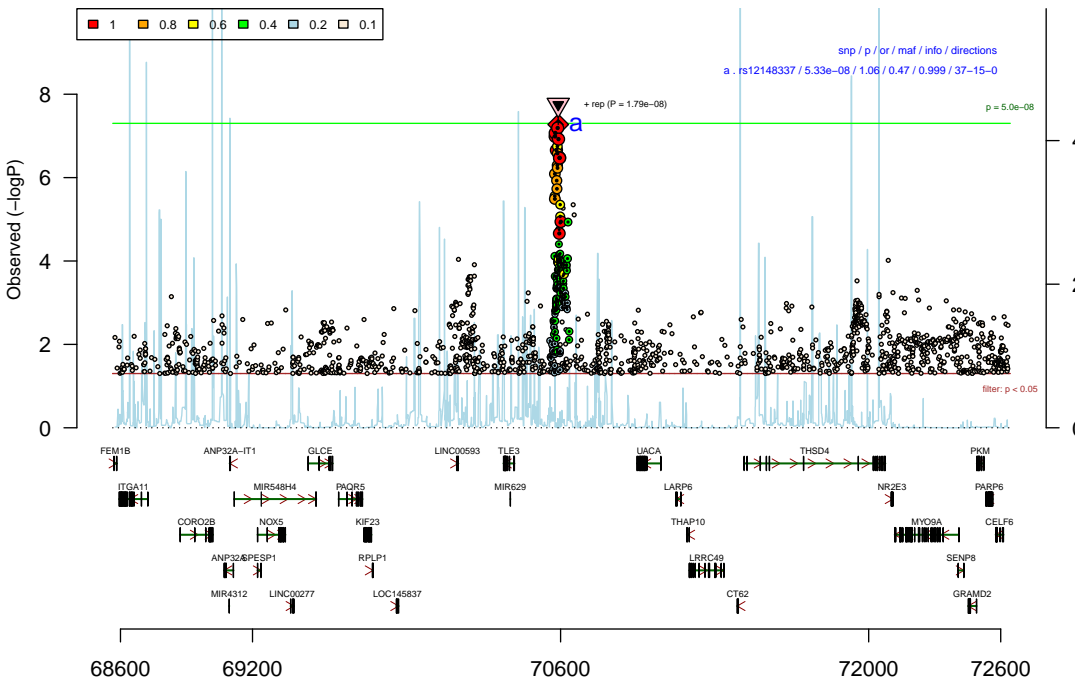

68600 69200 70600 72000 72600  
Chromosome 15 (kb)  
database: gwascatlog Nov\_2017.tp.txt, refGene.tst.Aug\_2013.txt.out

chr15:70573472–70633672; wave3; 2mb flank

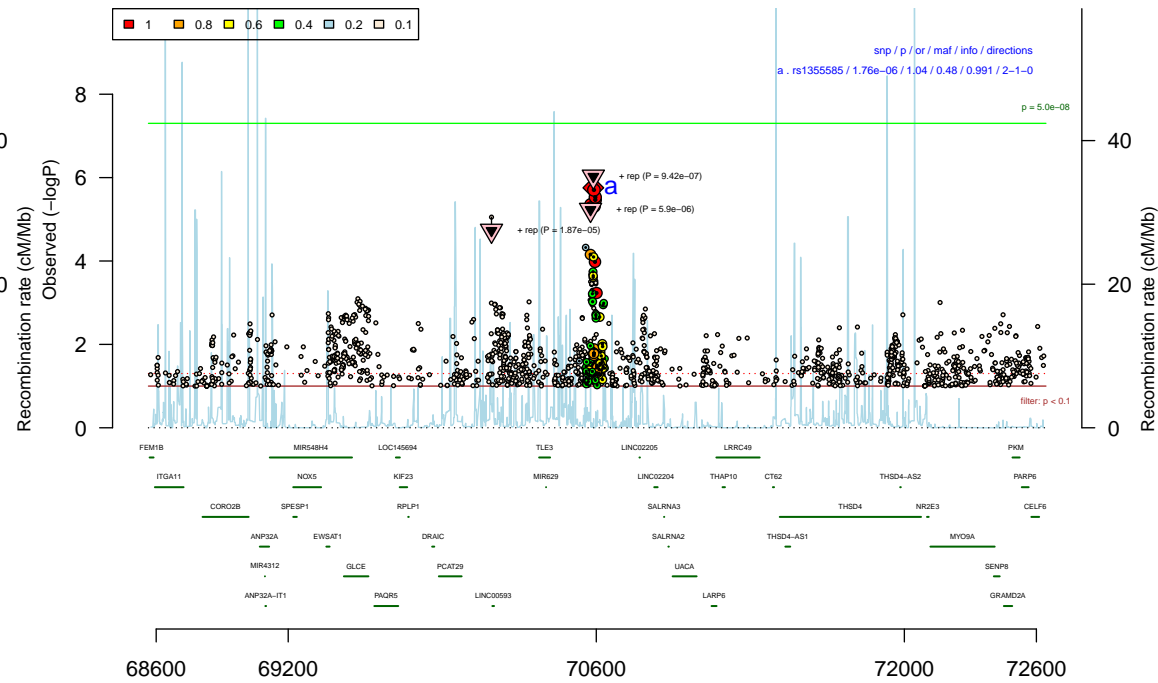

68600 69200 70600 72000 72600  
Chromosome 15 (kb)  
database: gwascatlog Nov\_2017.tp.txt, refGene.tst.Aug\_2017.out

chr2:149244178–149520178; wave2; 50kb flank

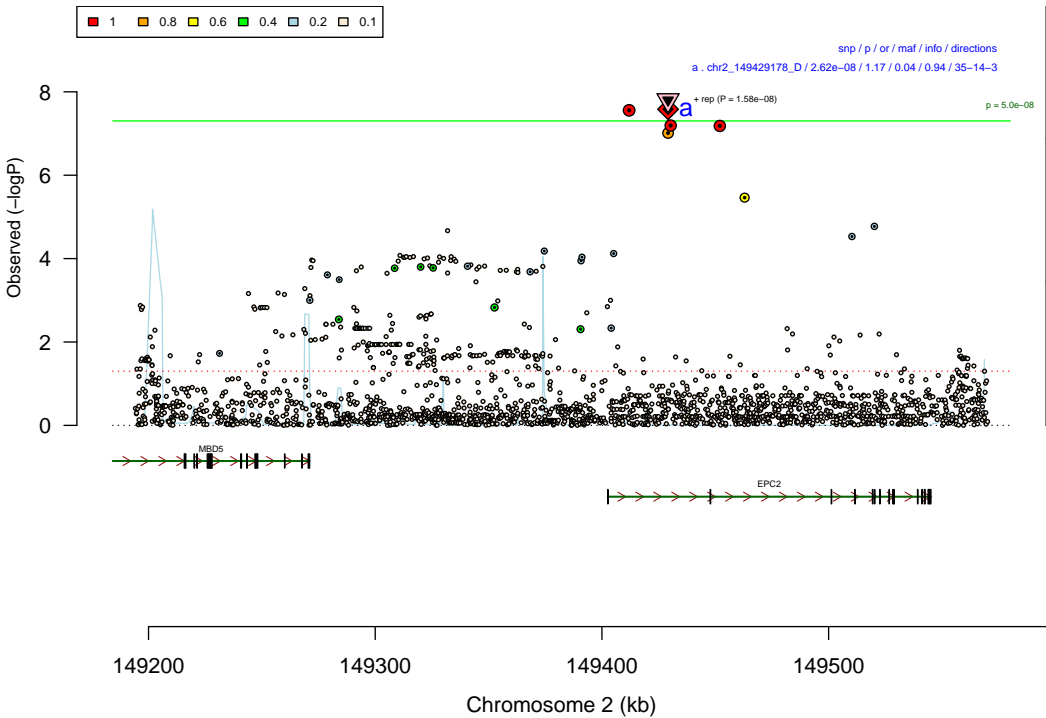

chr2:149244178–149520178; wave3; 50kb flank

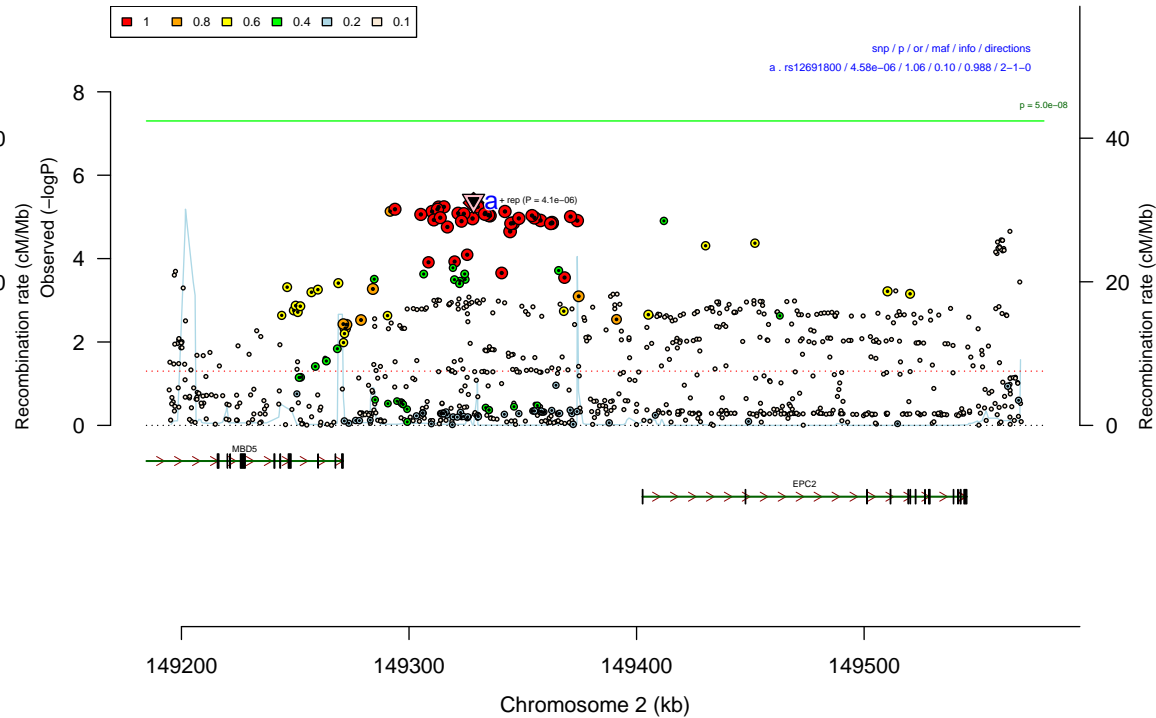

chr2:149244178–149520178; wave2; 2mb flank

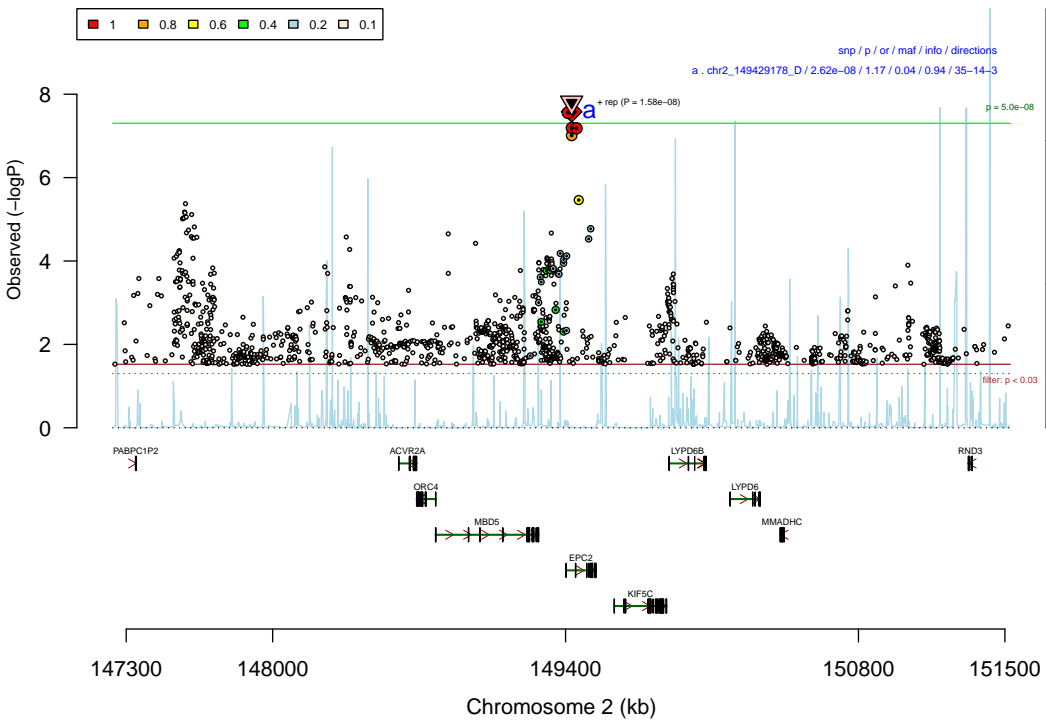

chr2:149244178–149520178; wave3; 2mb flank

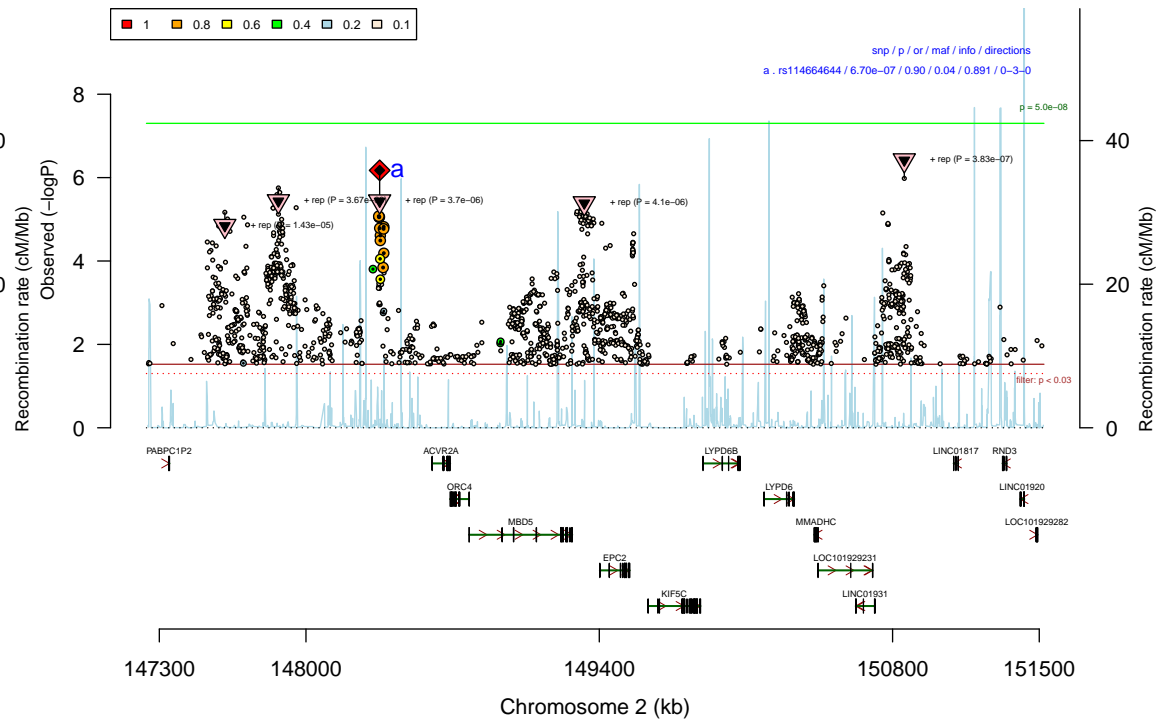

chr11:109182071–109623071; wave2; 50kb flank

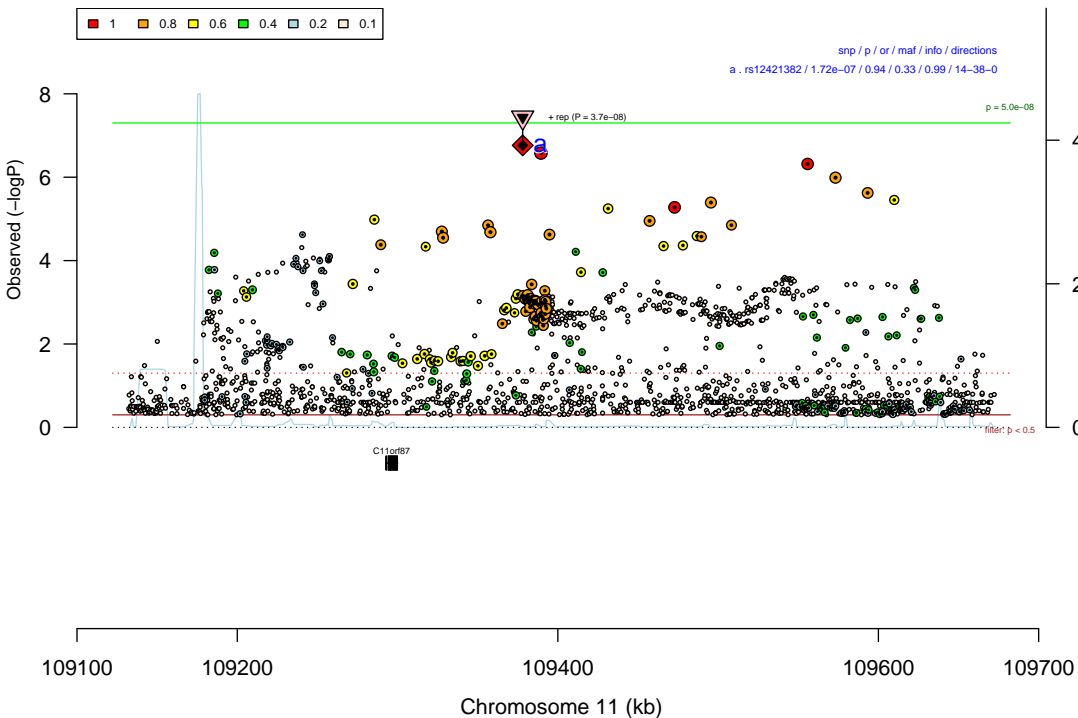

chr11:109182071–109623071; wave3; 50kb flank

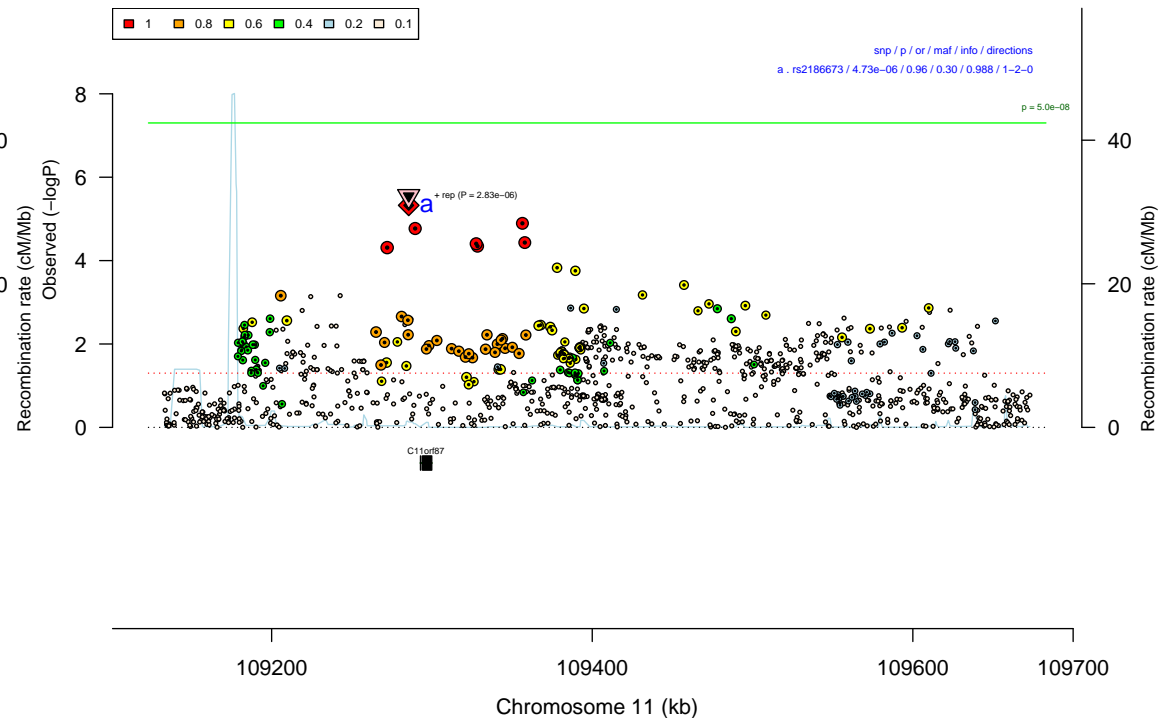

chr11:109182071–109623071; wave2; 2mb flank

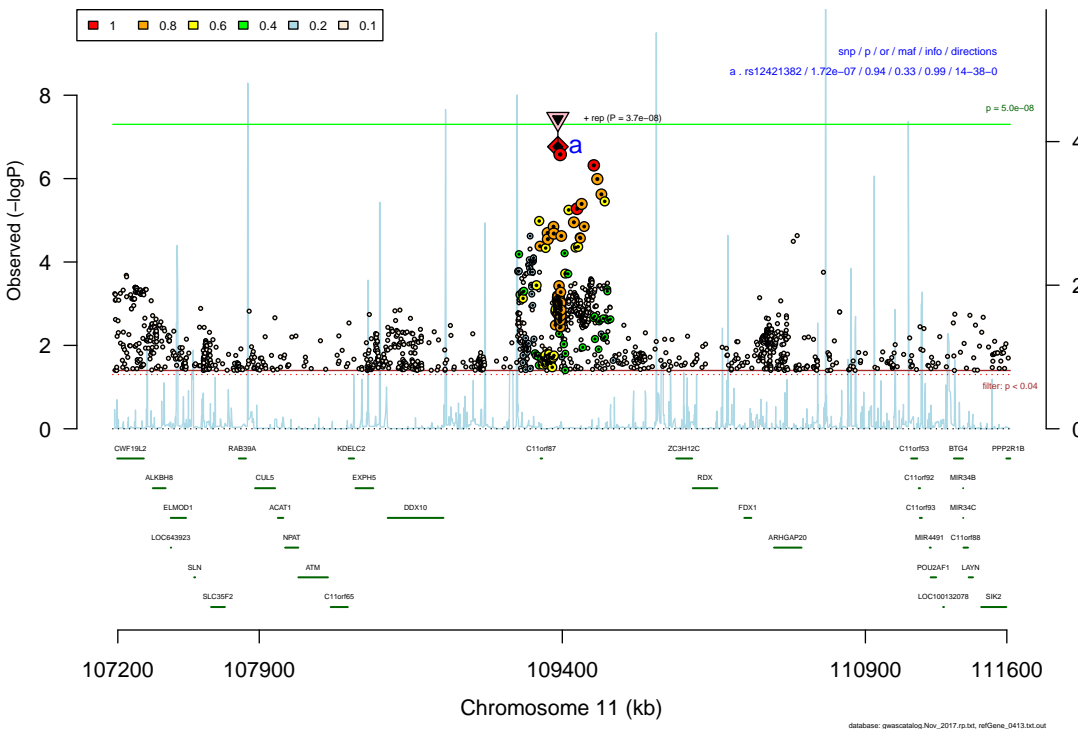

chr11:109182071–109623071; wave3; 2mb flank

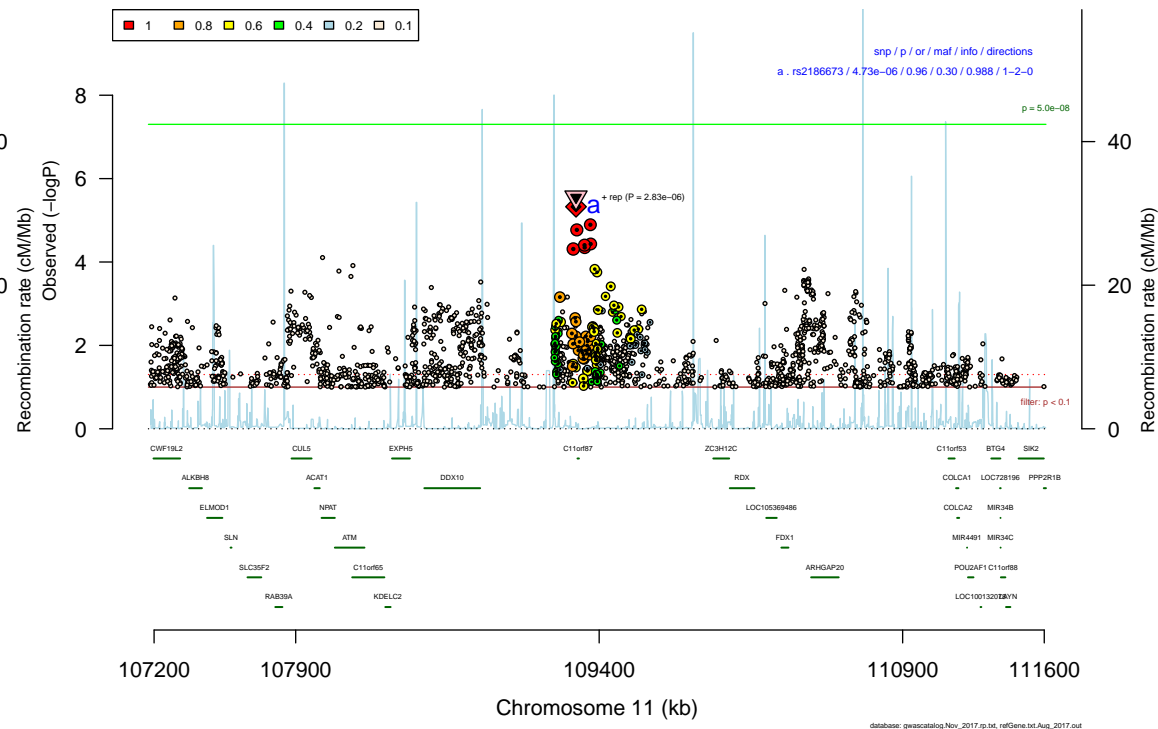

chr2:72325305-72745505; wave2; 50kb flank

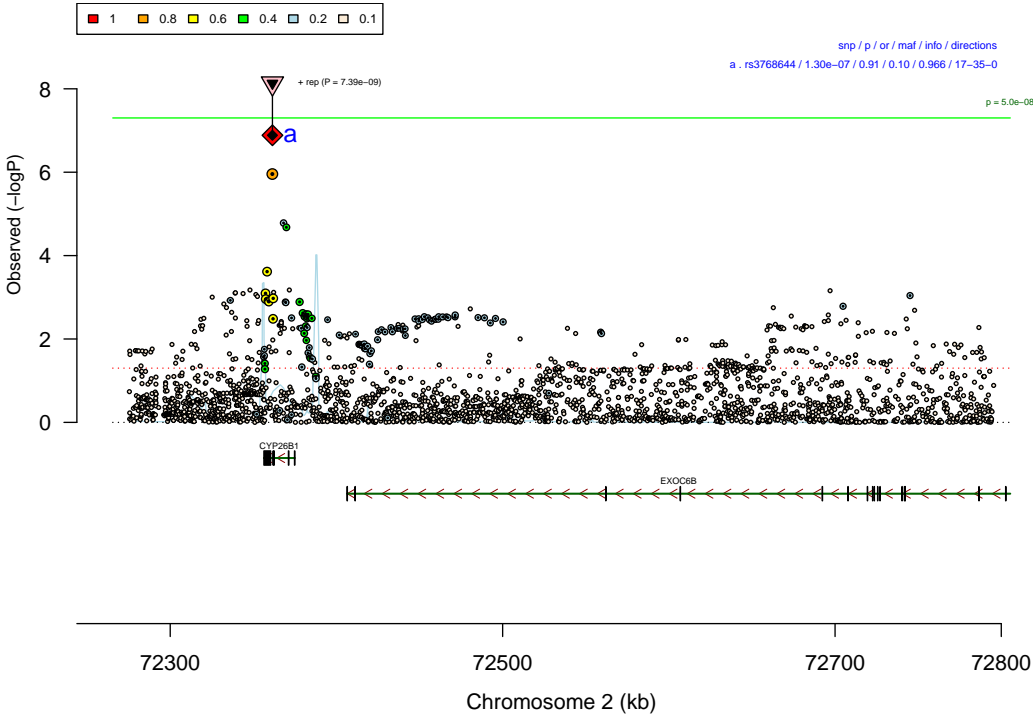

chr2:72325305-72745505; wave3; 50kb flank

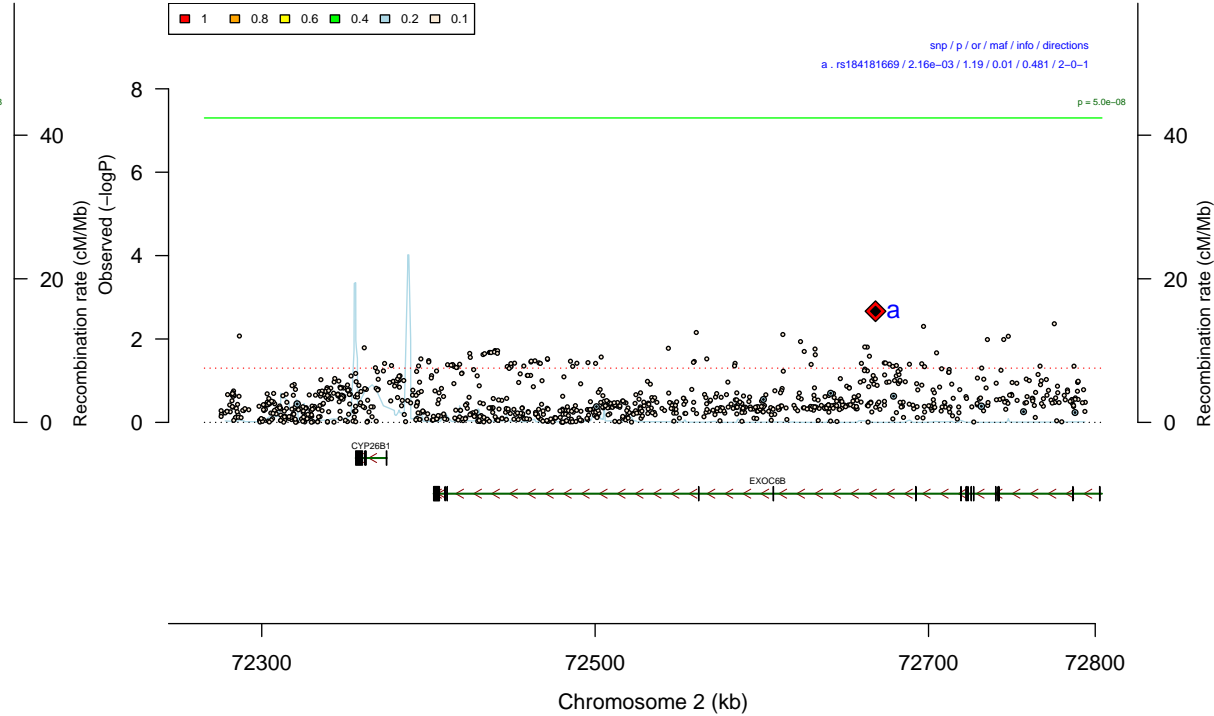

chr2:72325305-72745505; wave2; 2mb flank

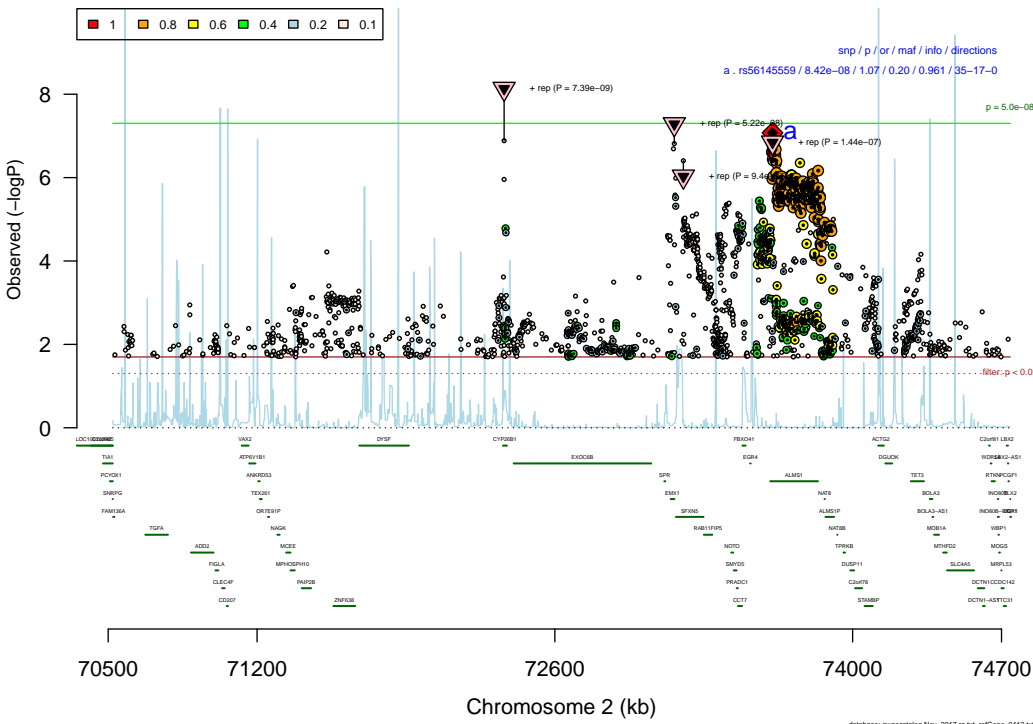

chr2:72325305-72745505; wave3; 2mb flank

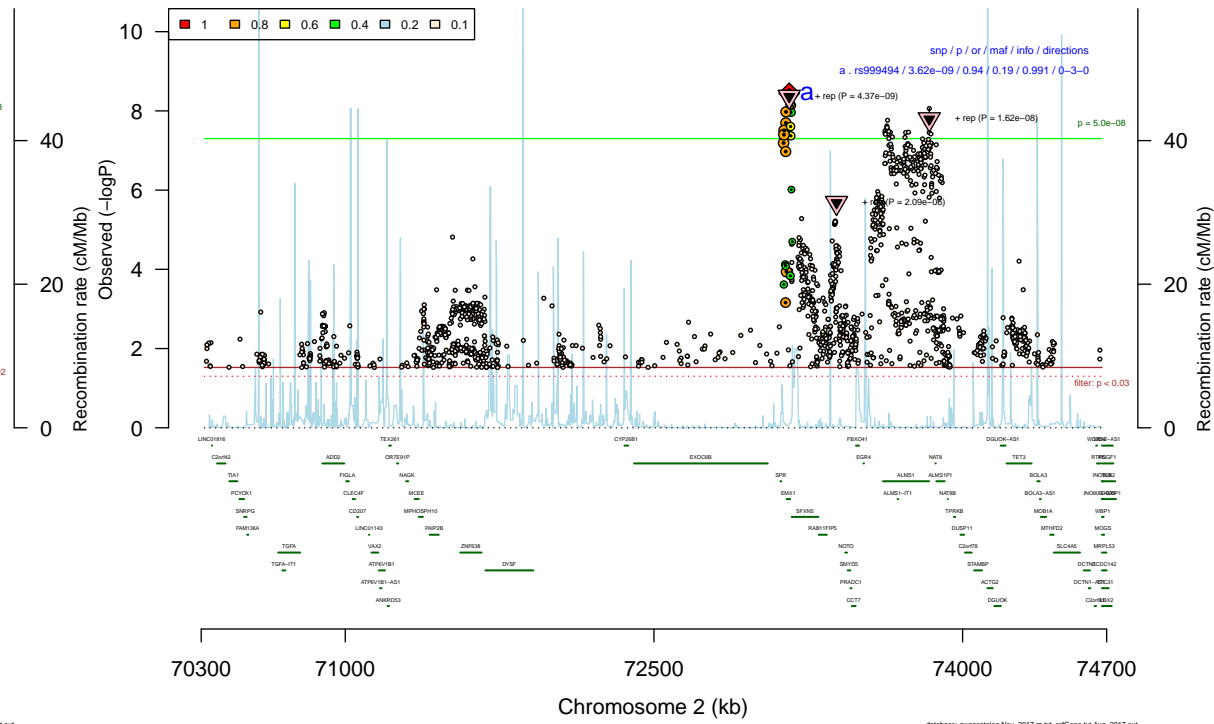

Supplement: NIHMS1824605-supplement-Fig_S6.pdf [file NIHMS1824605-supplement-Fig_S6.pdf]
