# Supplementary material
Source: PubMed Central journal article supplement (PMC9392466)

### SCZ\_uncond-rs13195636-chr6

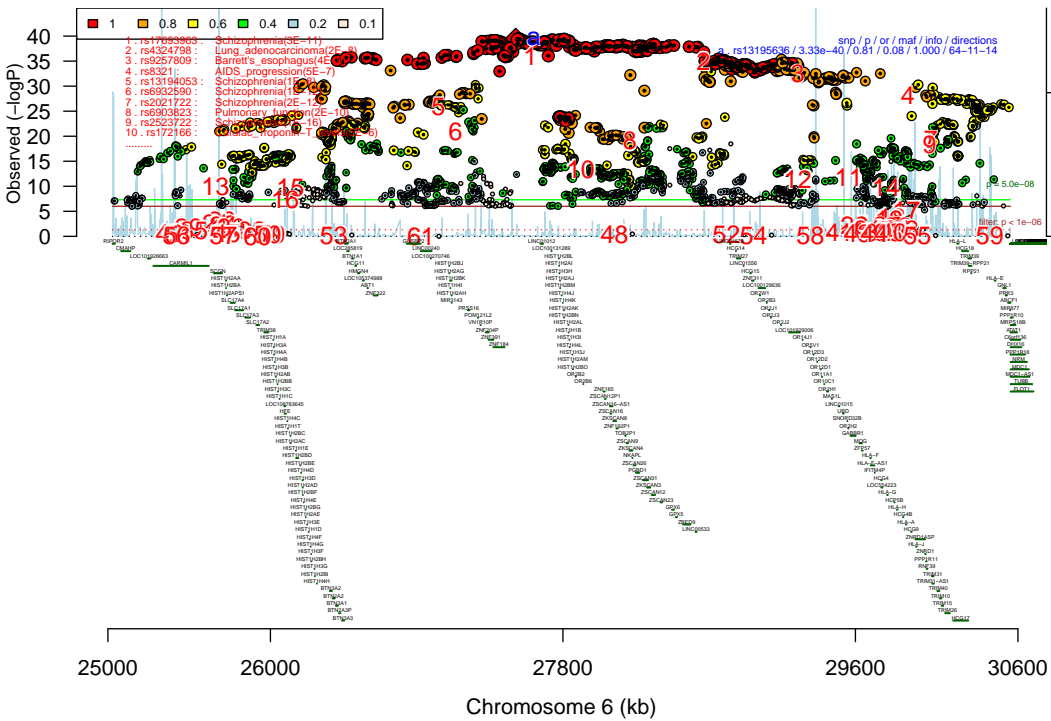

### SCZ\_cond-rs13195636-chr6

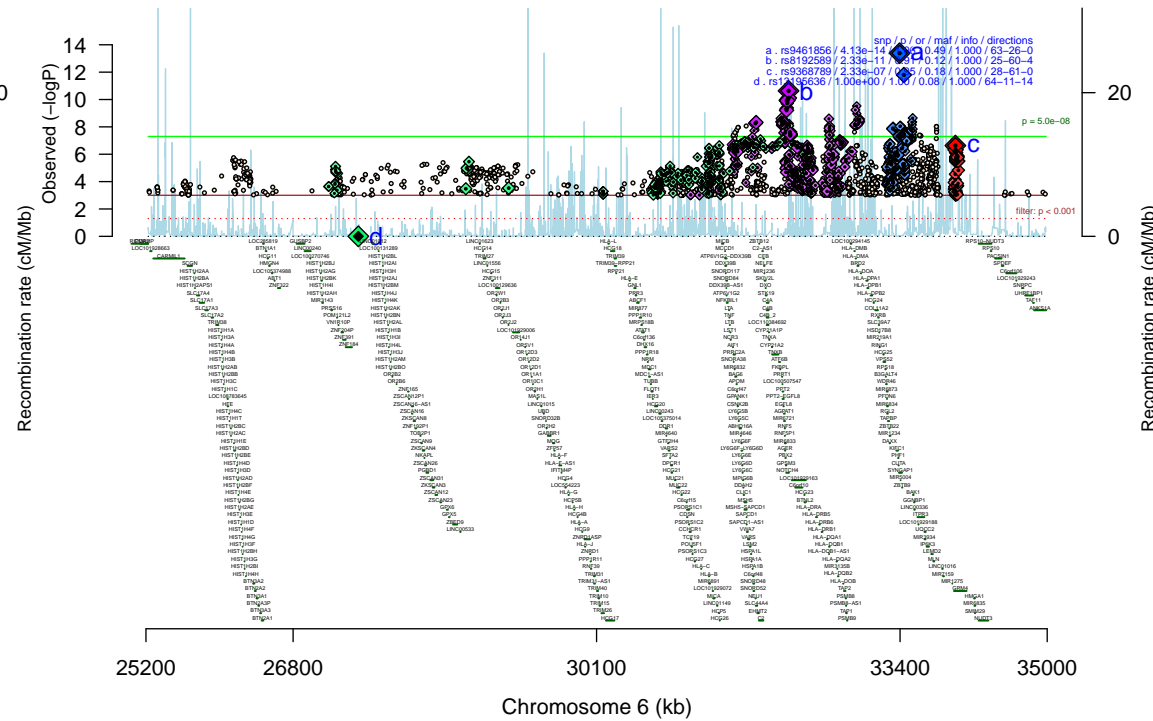

### SCZ\_cond-rs13195636-rs9461856-chr6

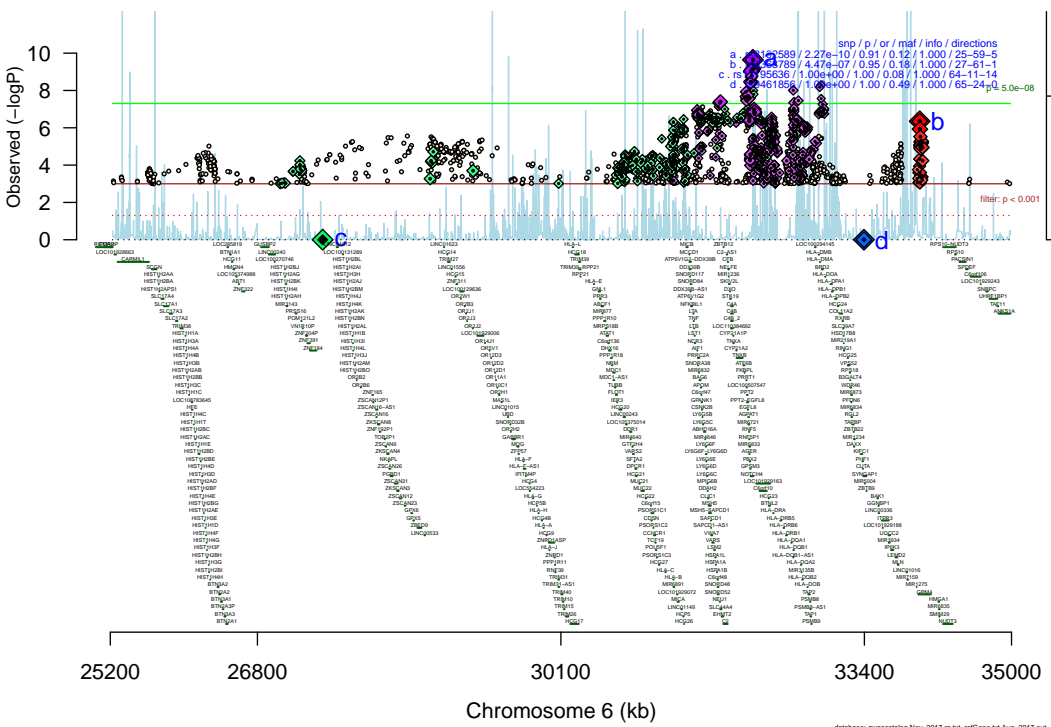

### SCZ\_cond-rs13195636-rs9461856-rs8192589-chr6

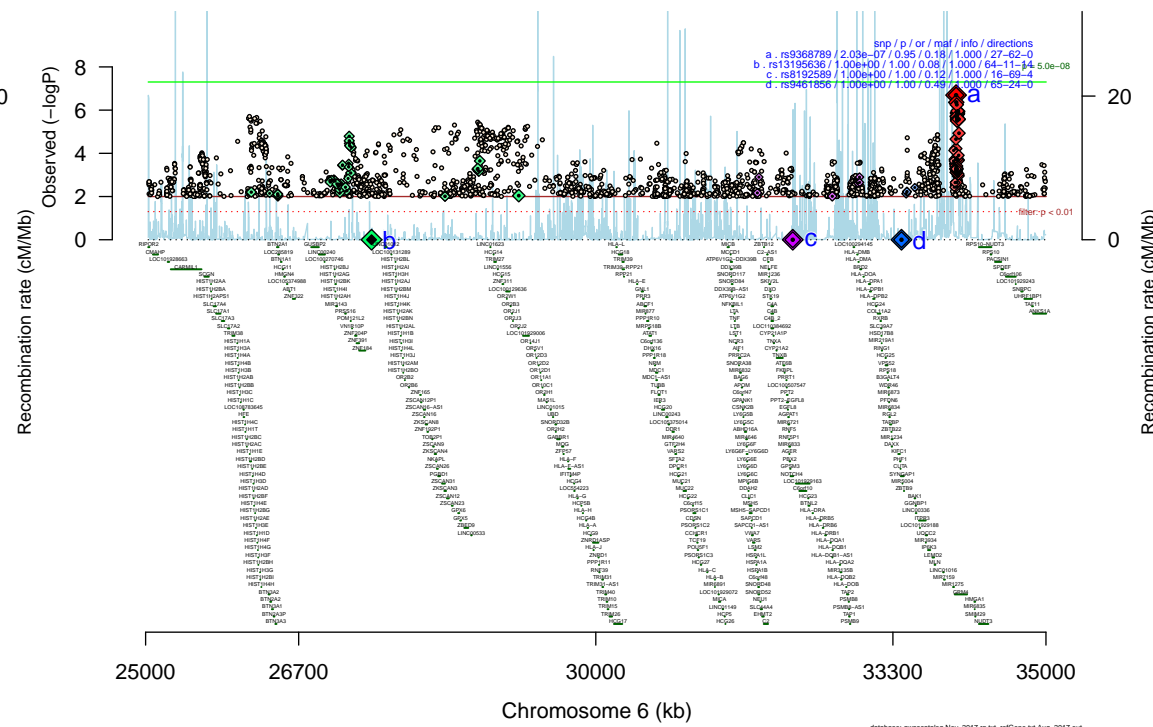

SC\_cond-rs13195636-rs9461856-rs8192589-rs9368789-chr6

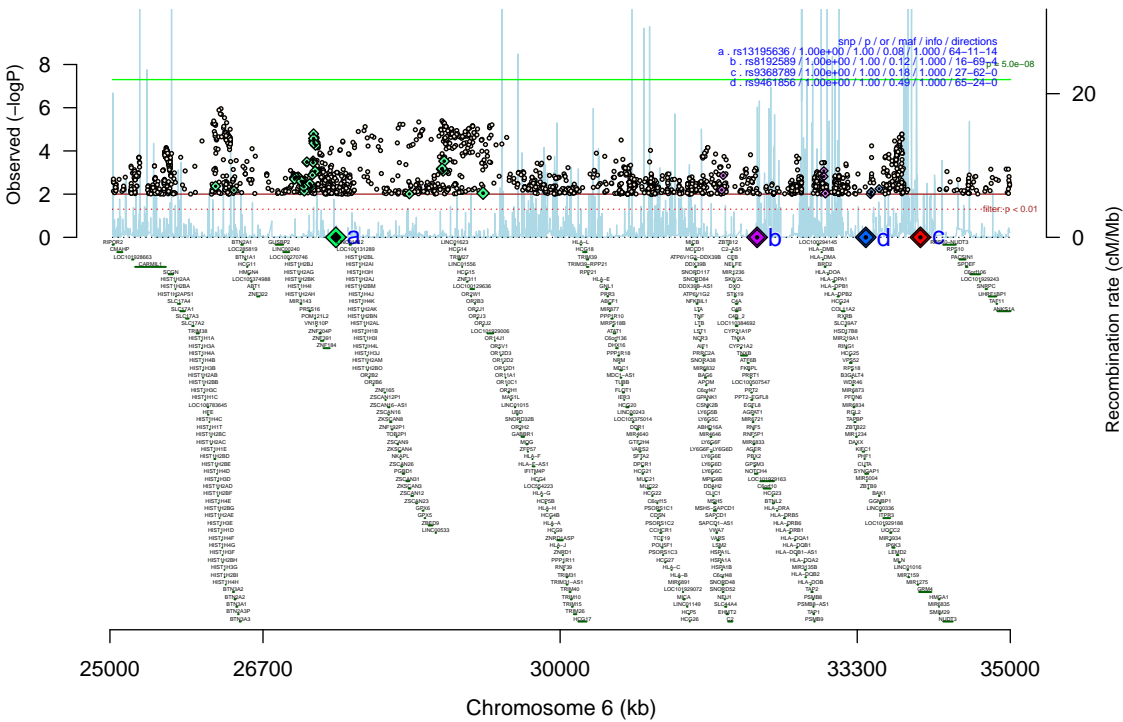

### SCZ\_uncond-rs58120505-chr7

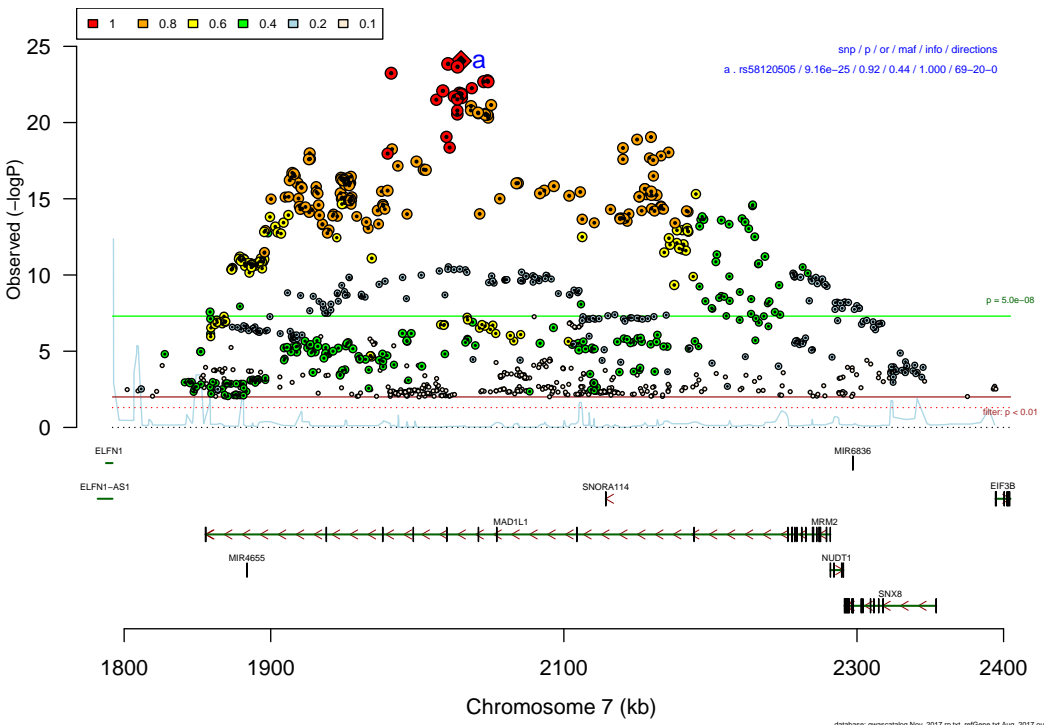

### SCZ\_cond\_rs58120505-chr7

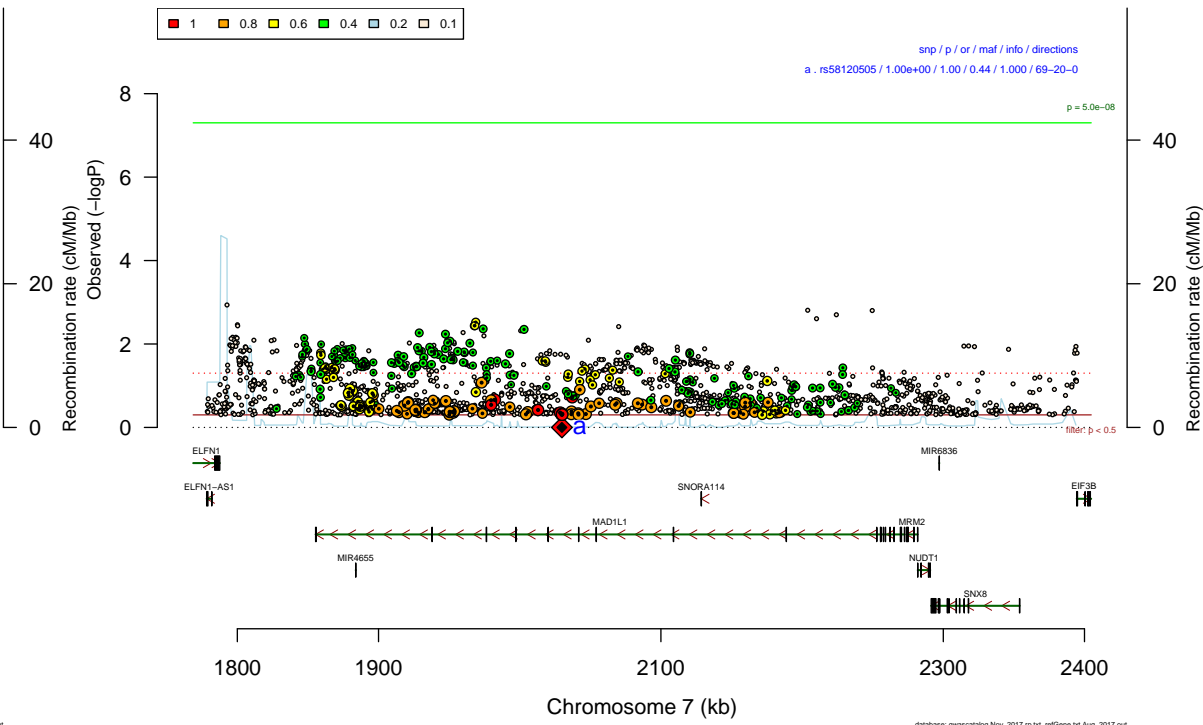

### SCZ\_uncond-rs79668541-chr10

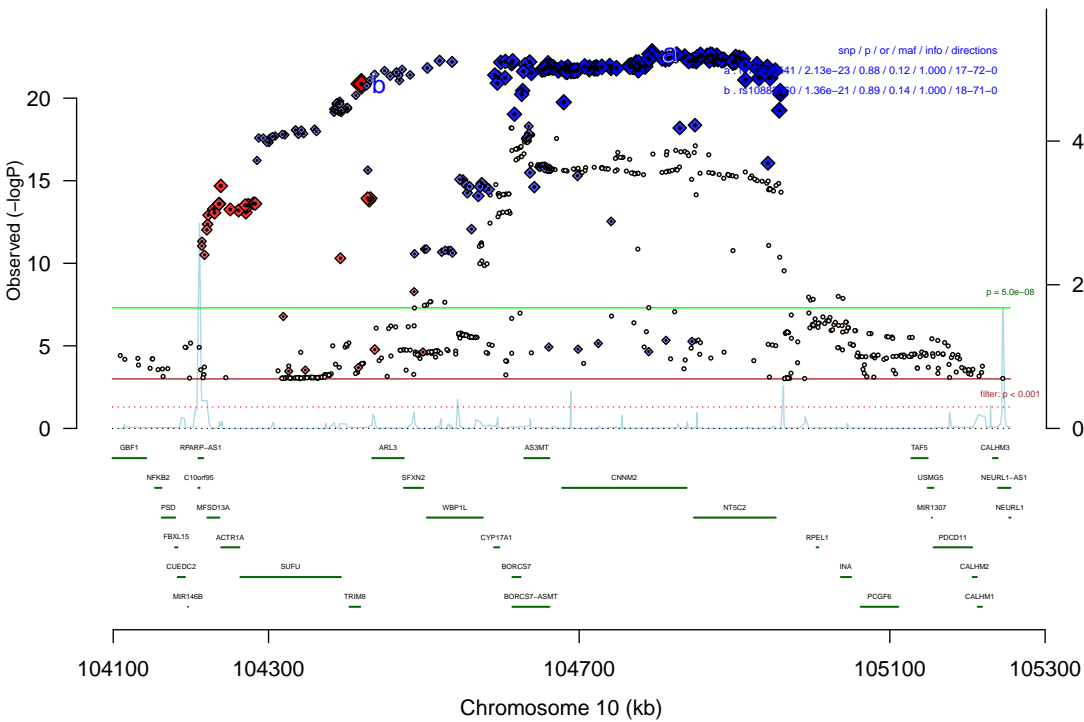

### SCZ\_cond\_rs79668541-chr10

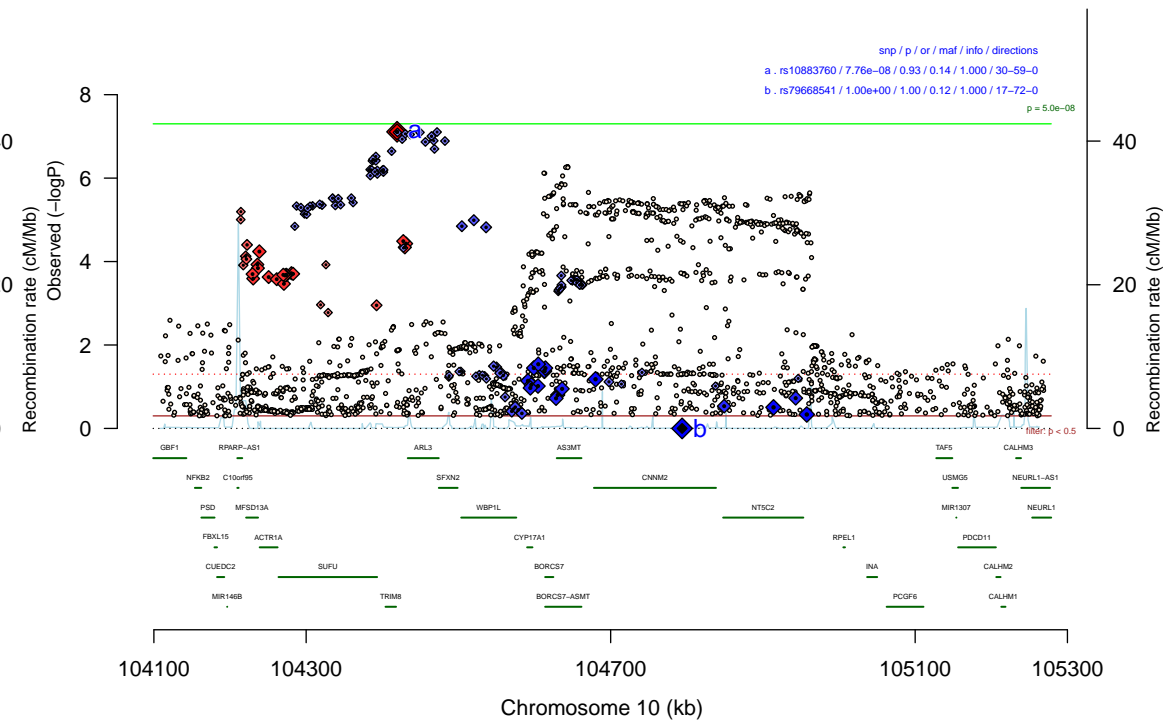

### SCZ\_cond\_rs79668541-rs10883760-chr10

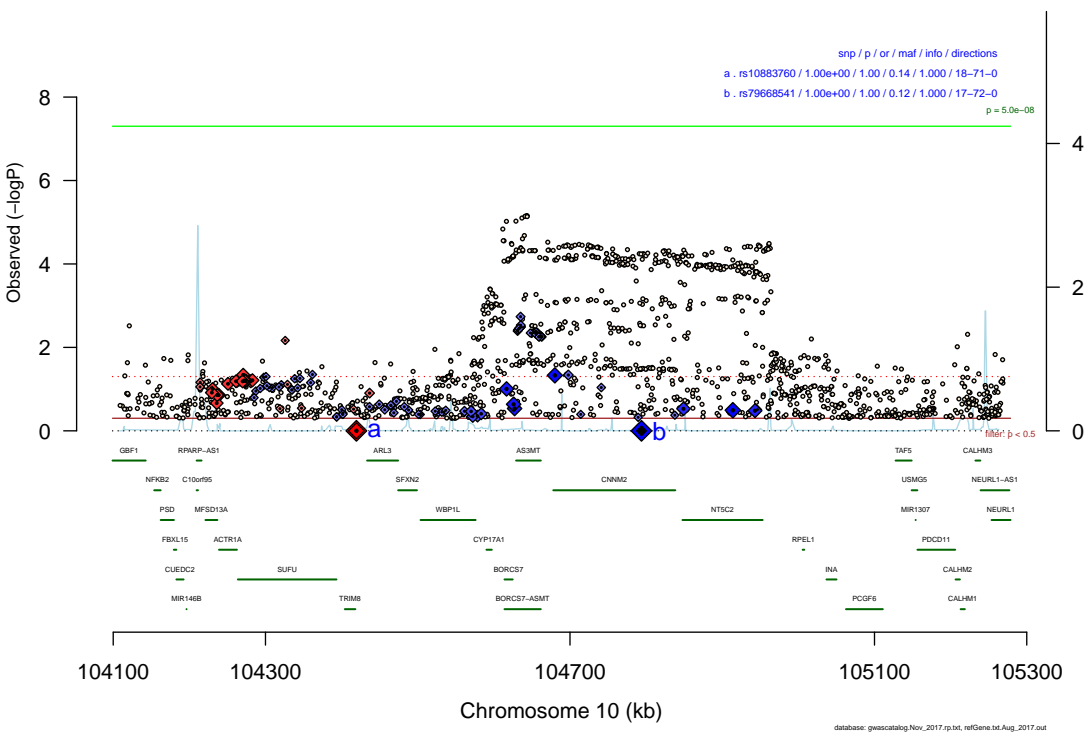

### SCZ\_uncond-rs4702-chr15

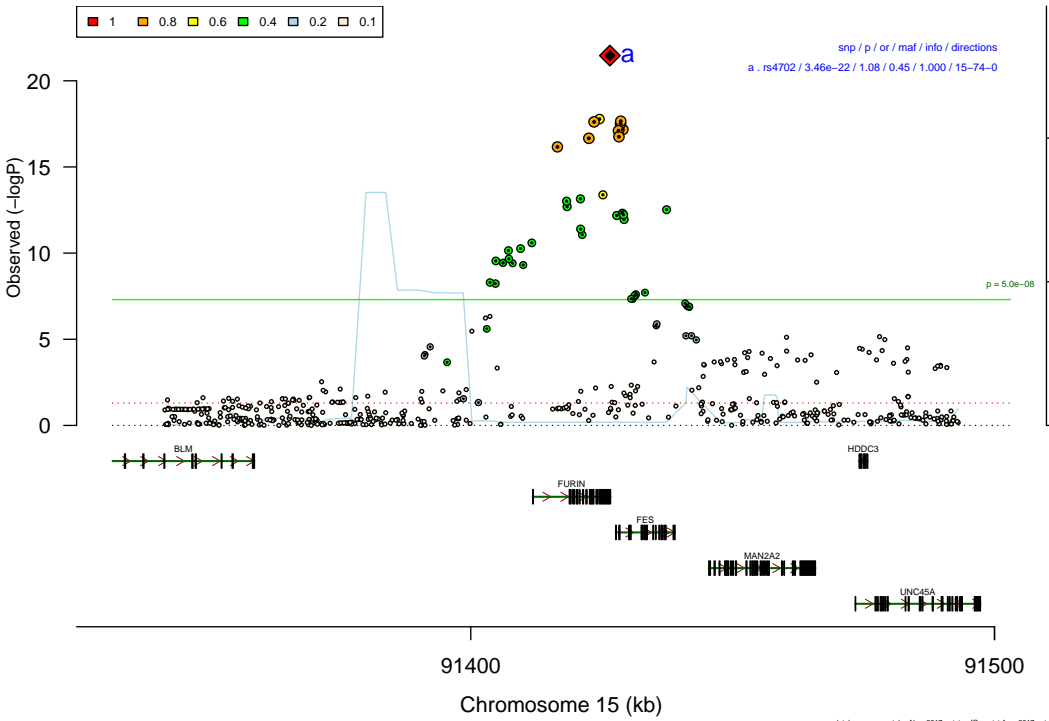

### SCZ\_cond\_rs4702-chr15

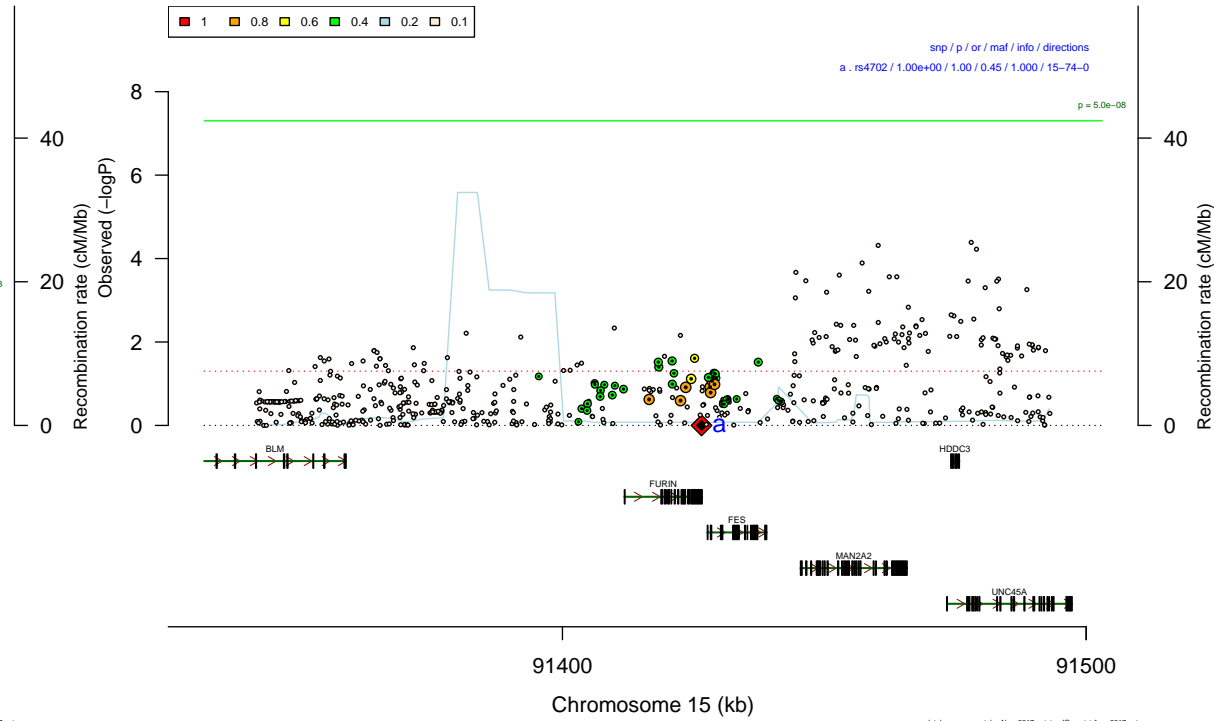

### SCZ\_uncond-rs2102949-chr12

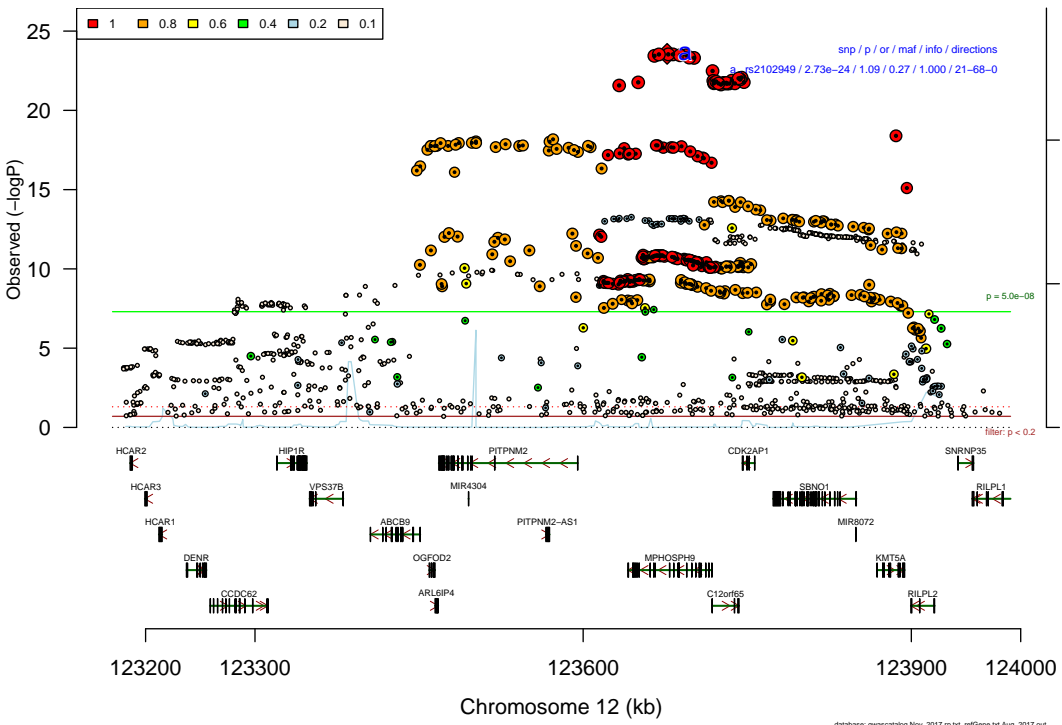

### SCZ\_cond\_rs2102949-chr12

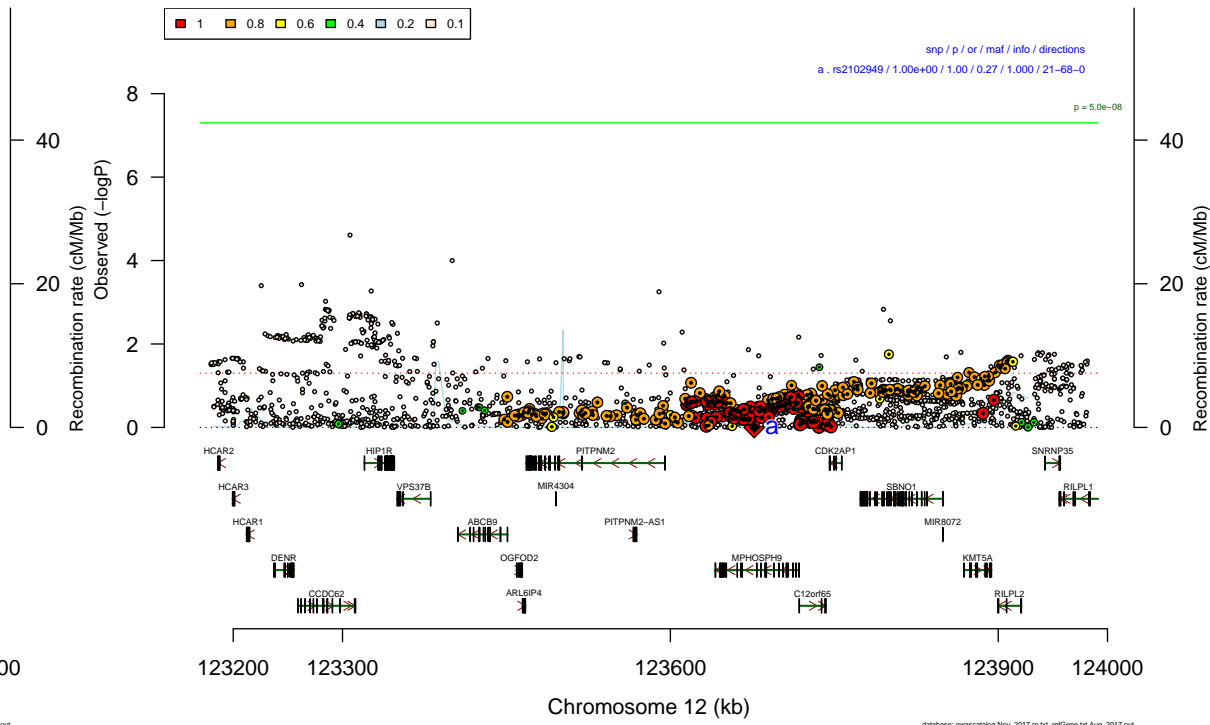

### SCZ\_uncond-rs13107325-chr4

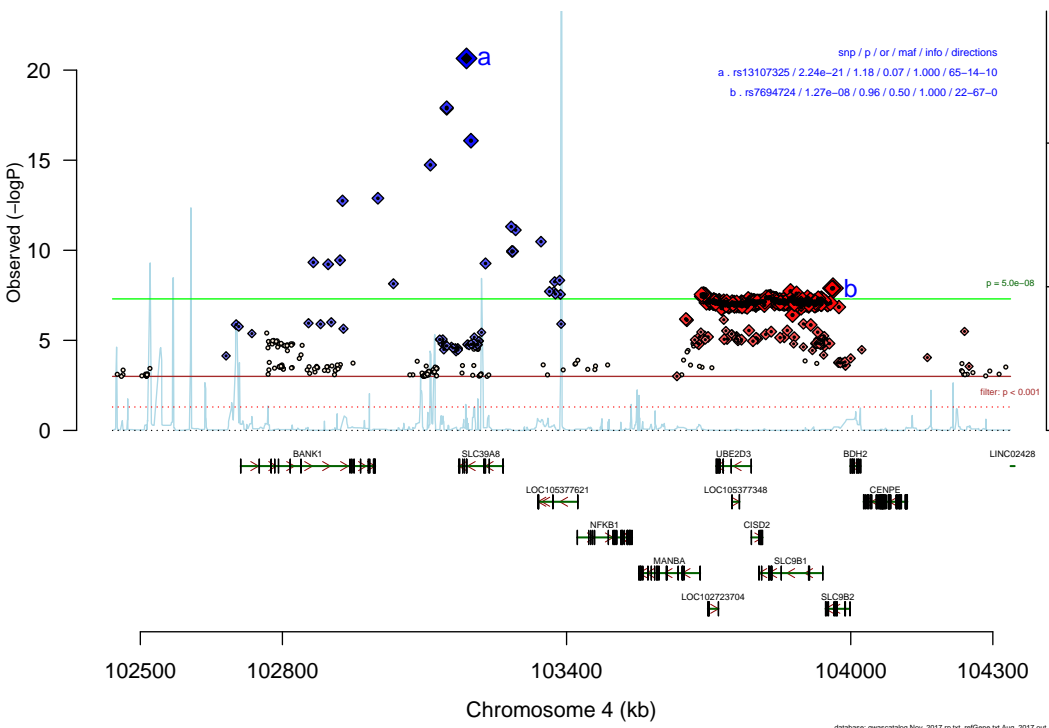

### SCZ\_cond\_rs13107325-chr4

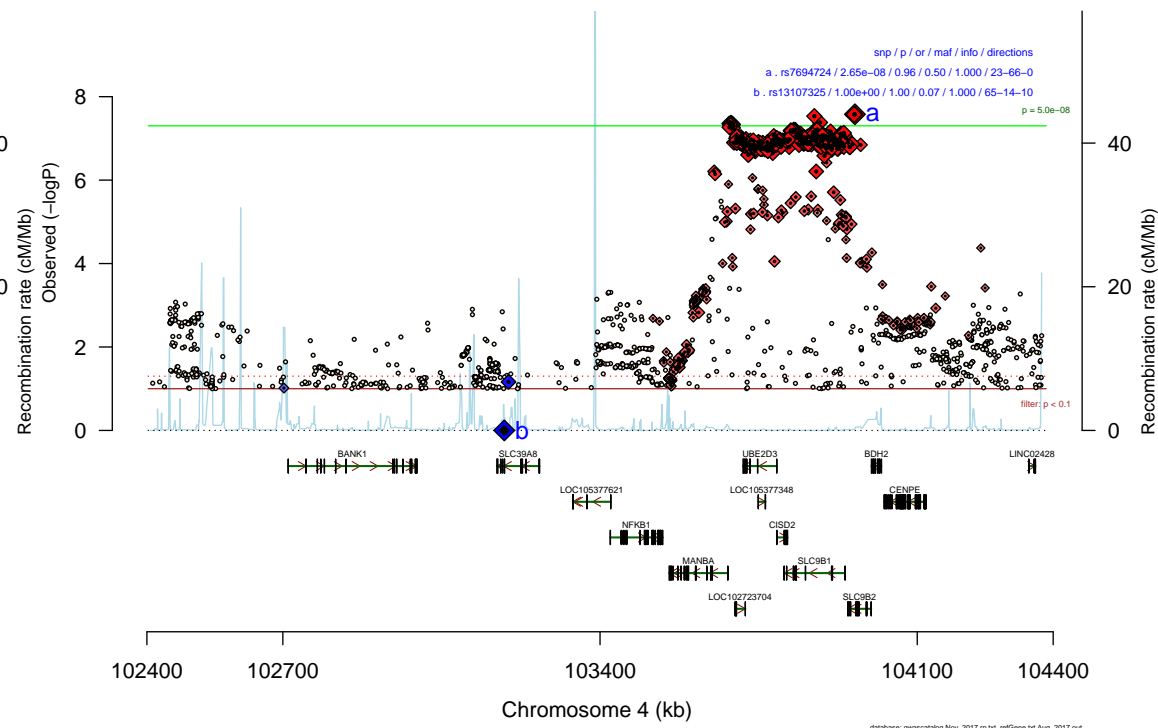

### SCZ\_cond\_rs13107325-rs7694724-chr4

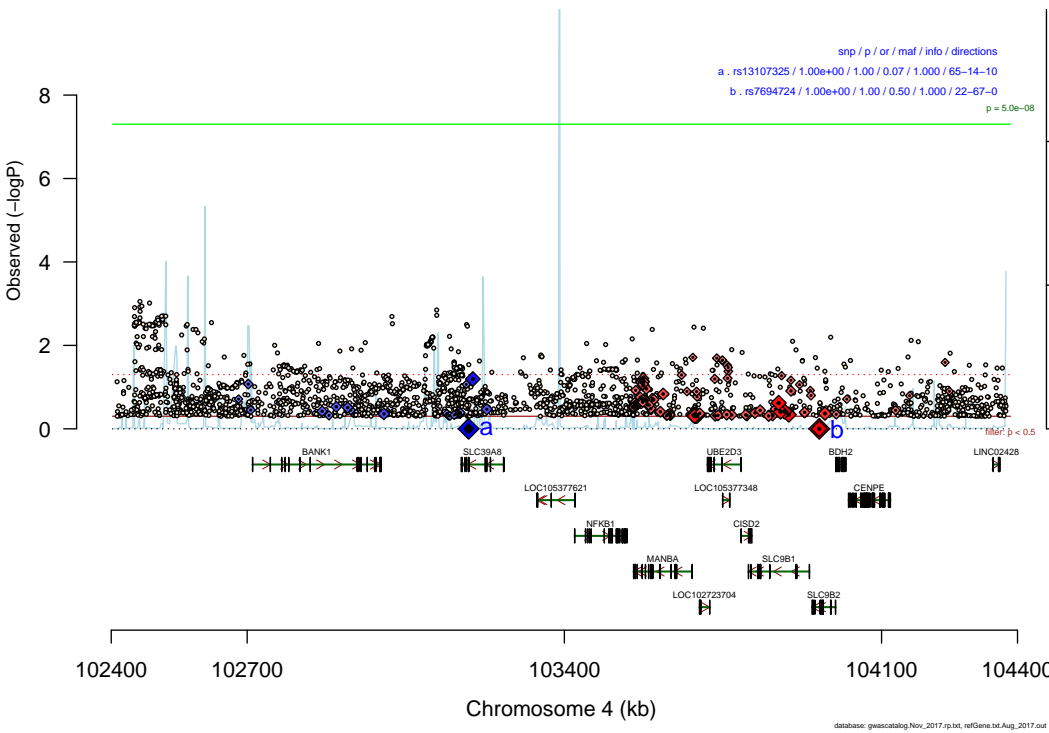

### SCZ\_uncond-rs10774034-chr12

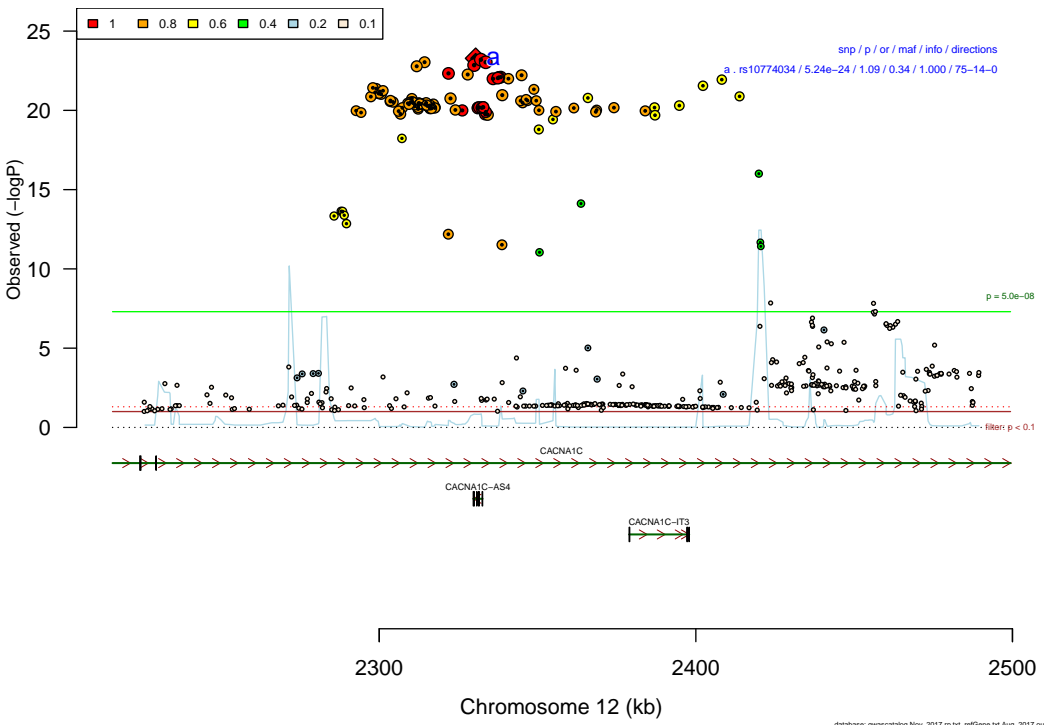

### SCZ\_cond\_rs10774034-chr12

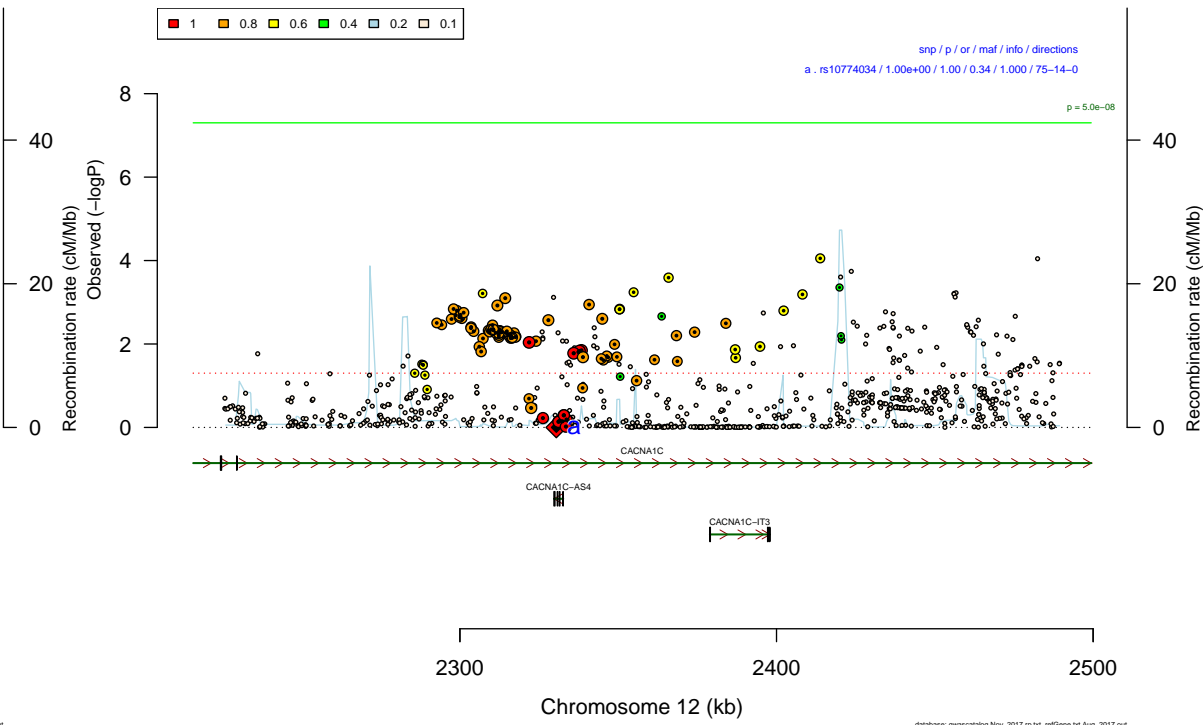



### SCZ\_uncond-rs2710323-chr3

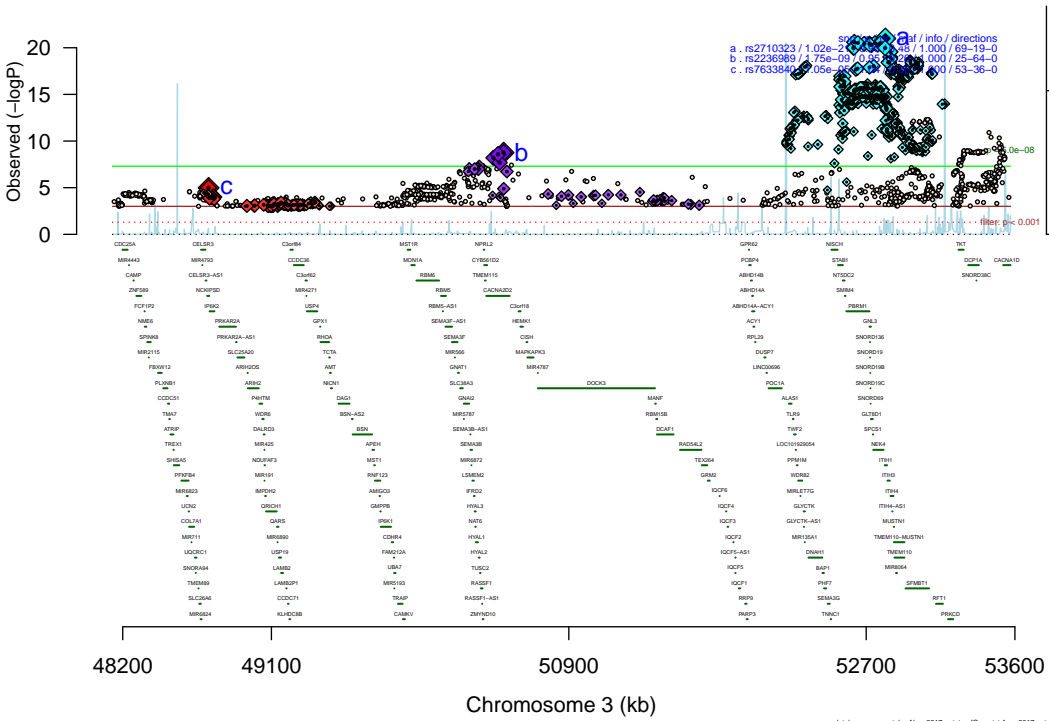

### SCZ\_cond\_rs2710323-chr3

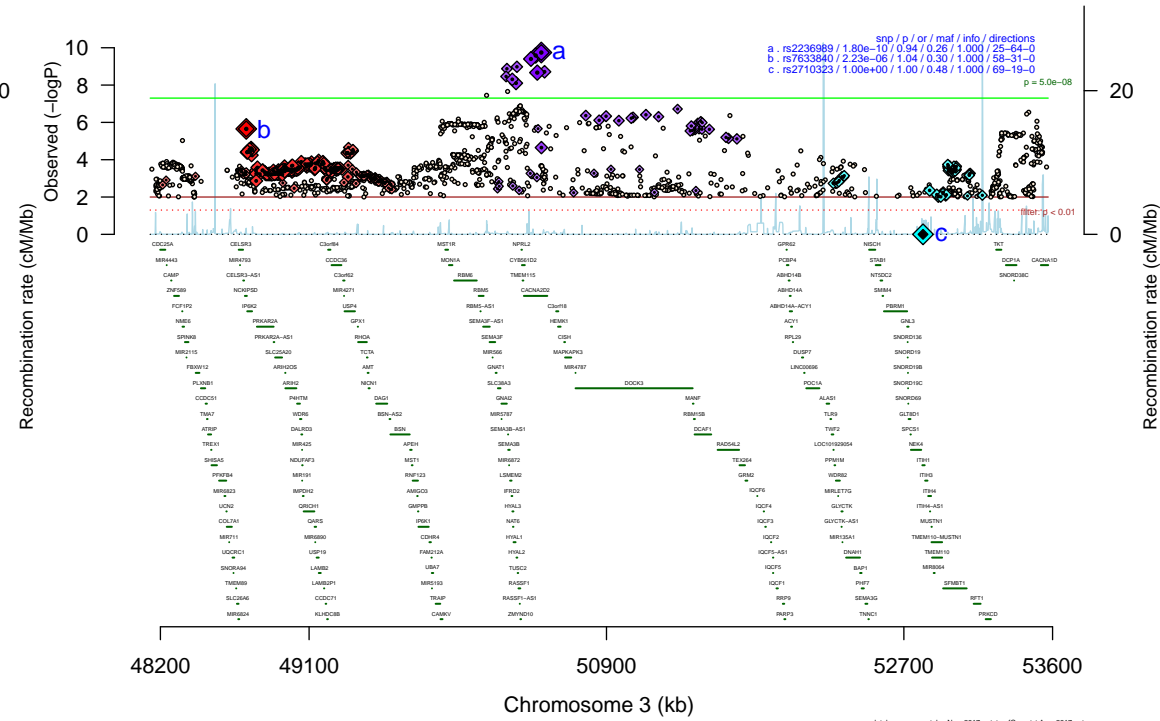

### SCZ\_cond\_rs2710323-rs2236989-chr3

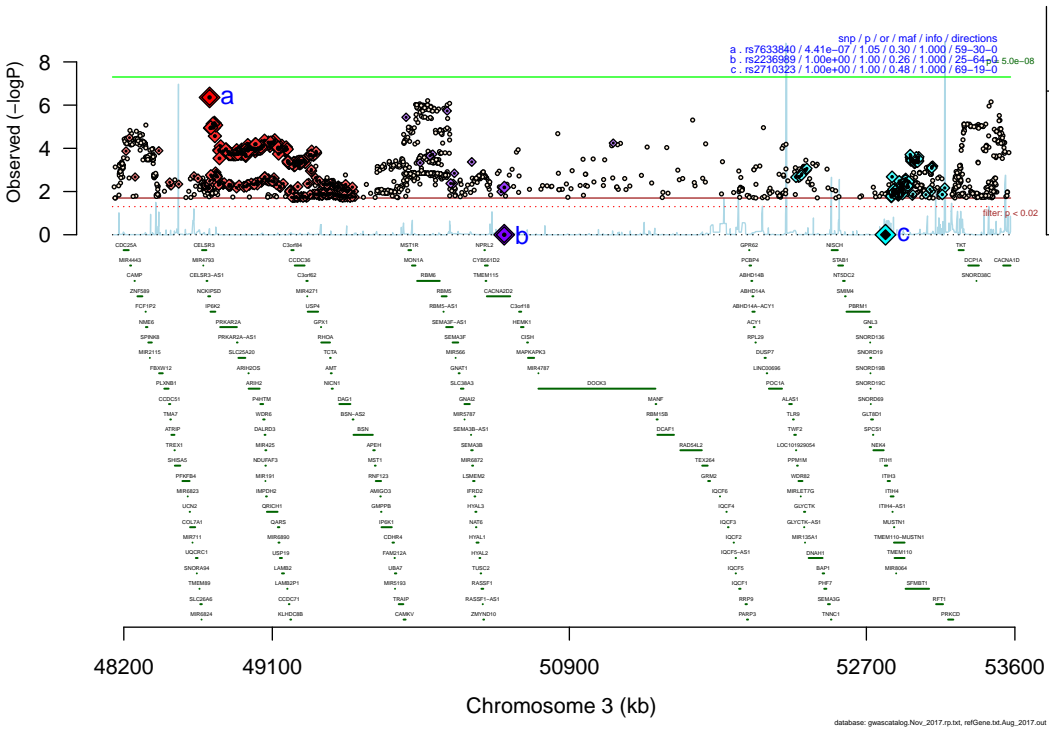

### SCZ\_cond\_rs2710323-rs2236989-rs7633840-chr3

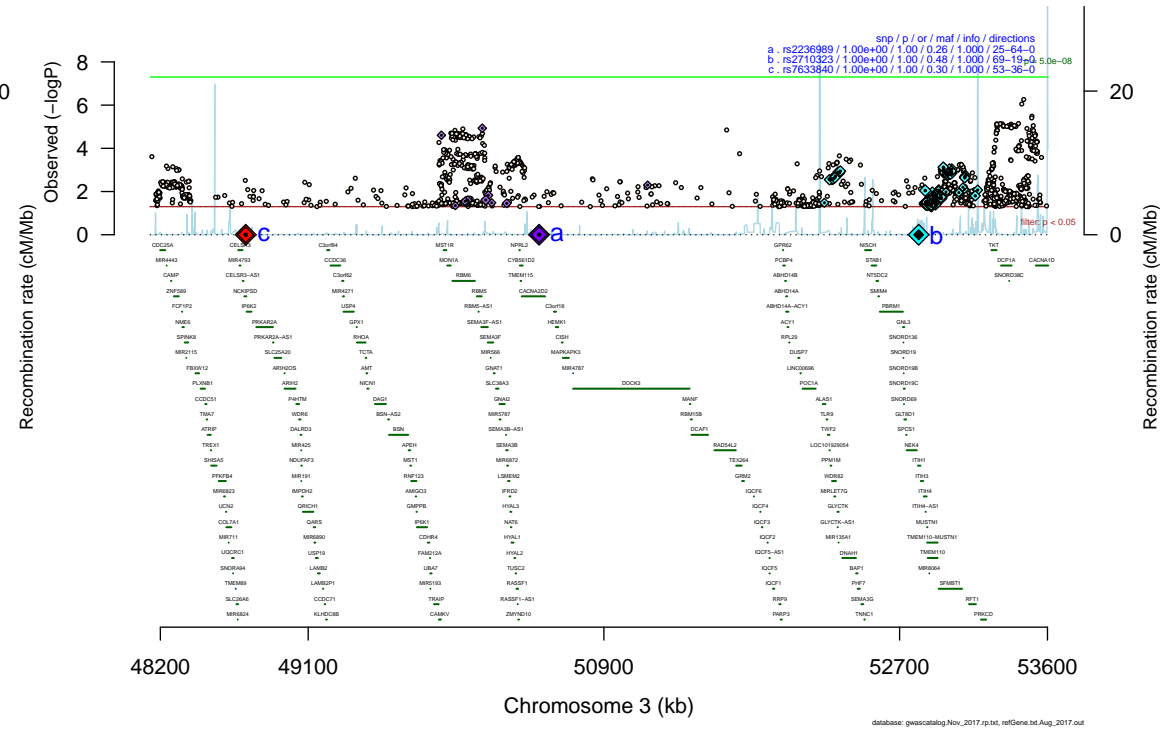

### SCZ\_uncond-rs2717003-chr2

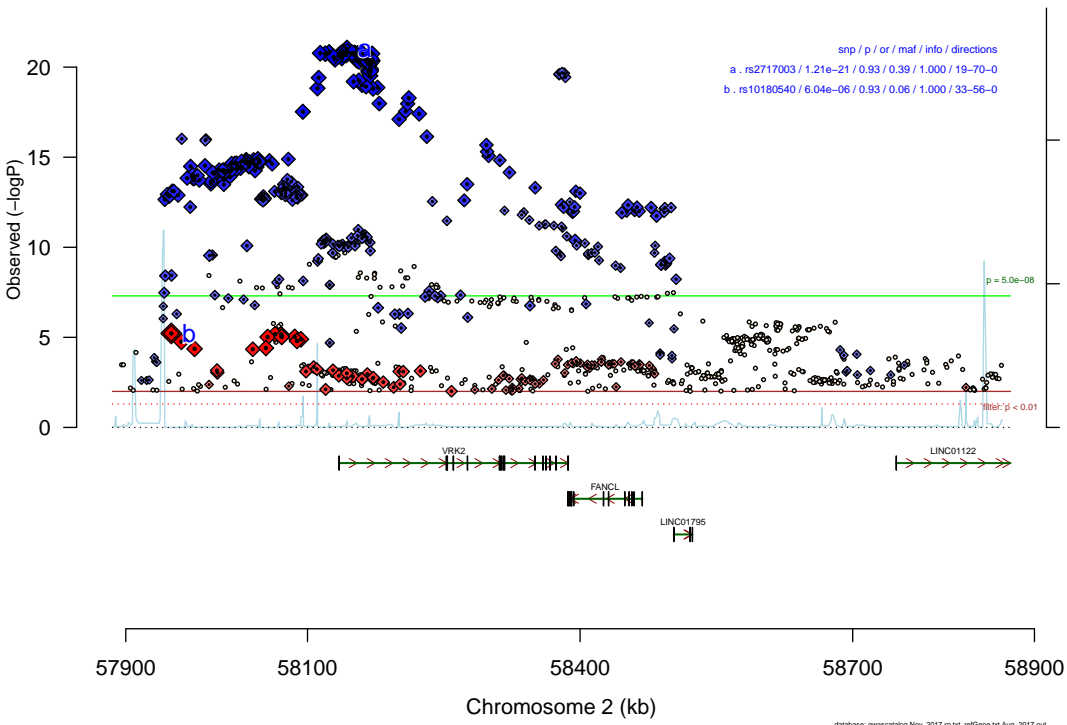

### SCZ\_cond\_rs2717003-chr2

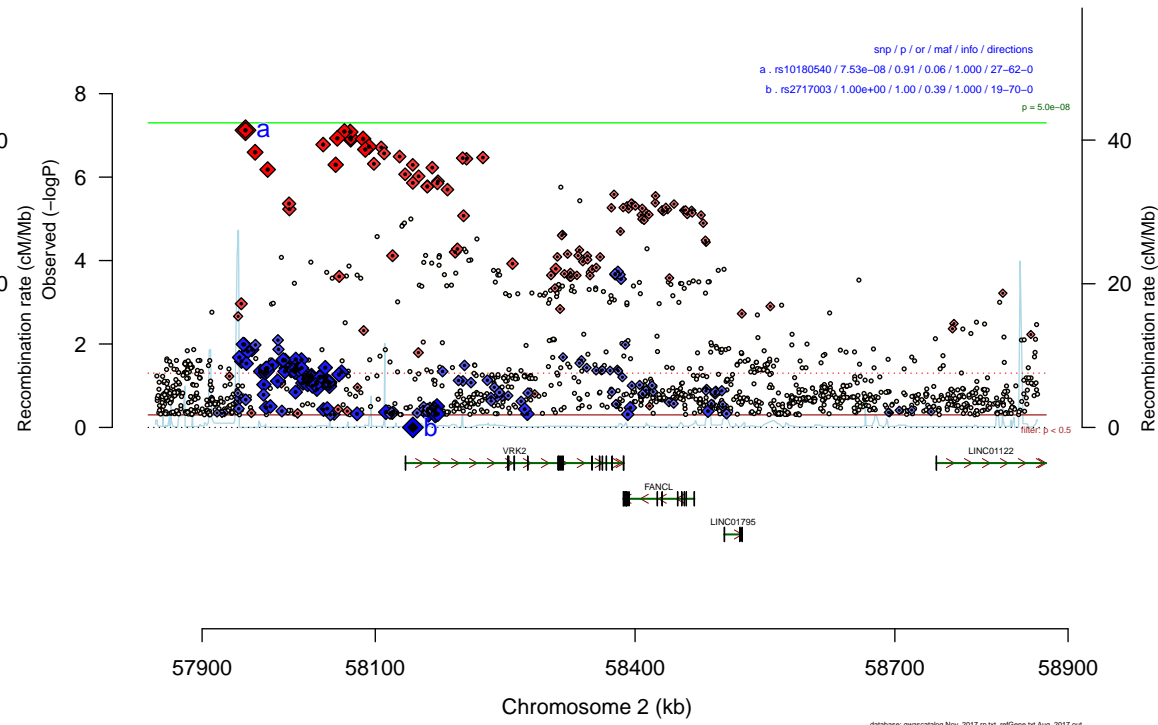

### SCZ\_cond\_rs2717003-rs10180540-chr2

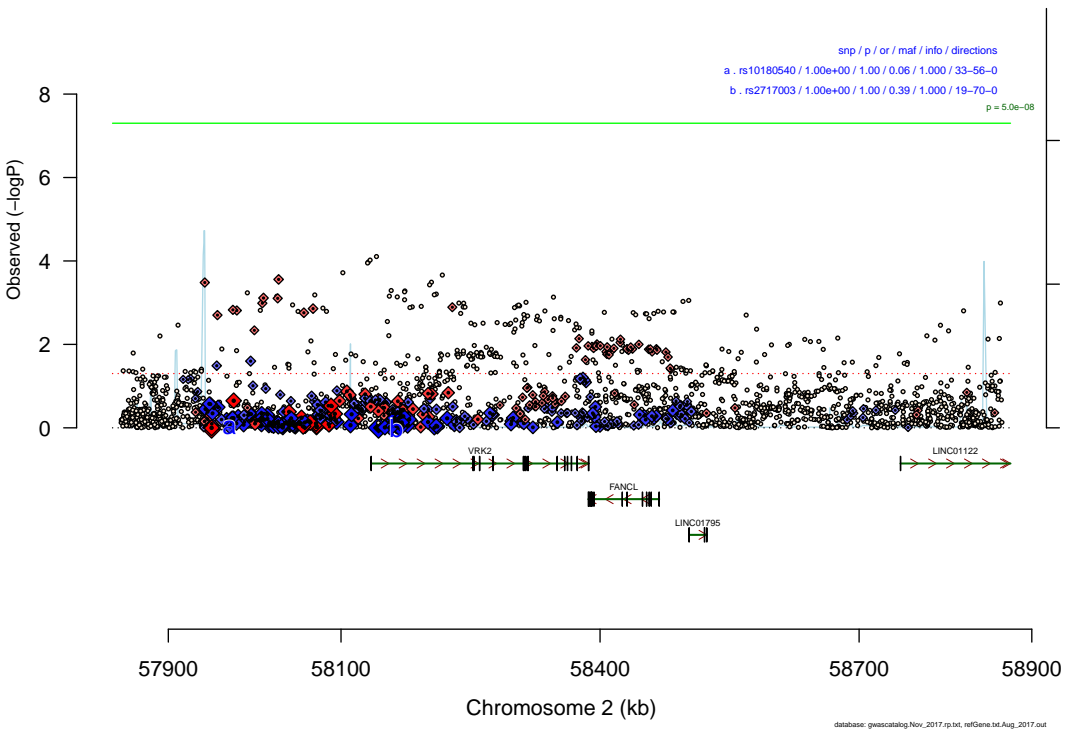

### SCZ\_uncond-rs1198588-chr1

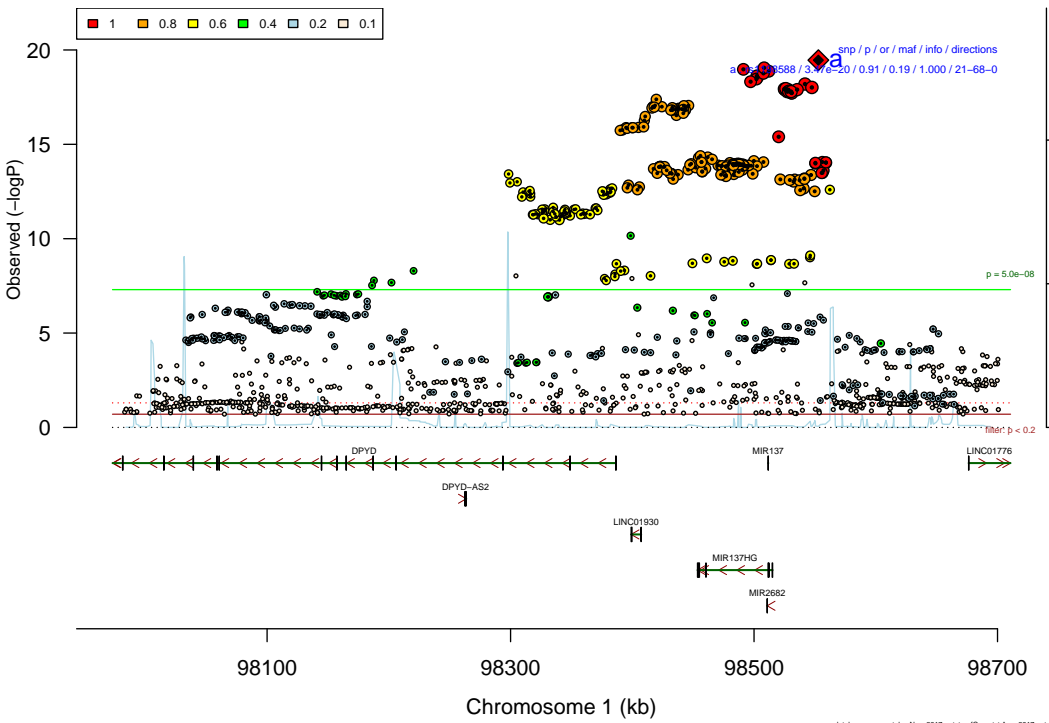

### SCZ\_cond\_rs1198588-chr1

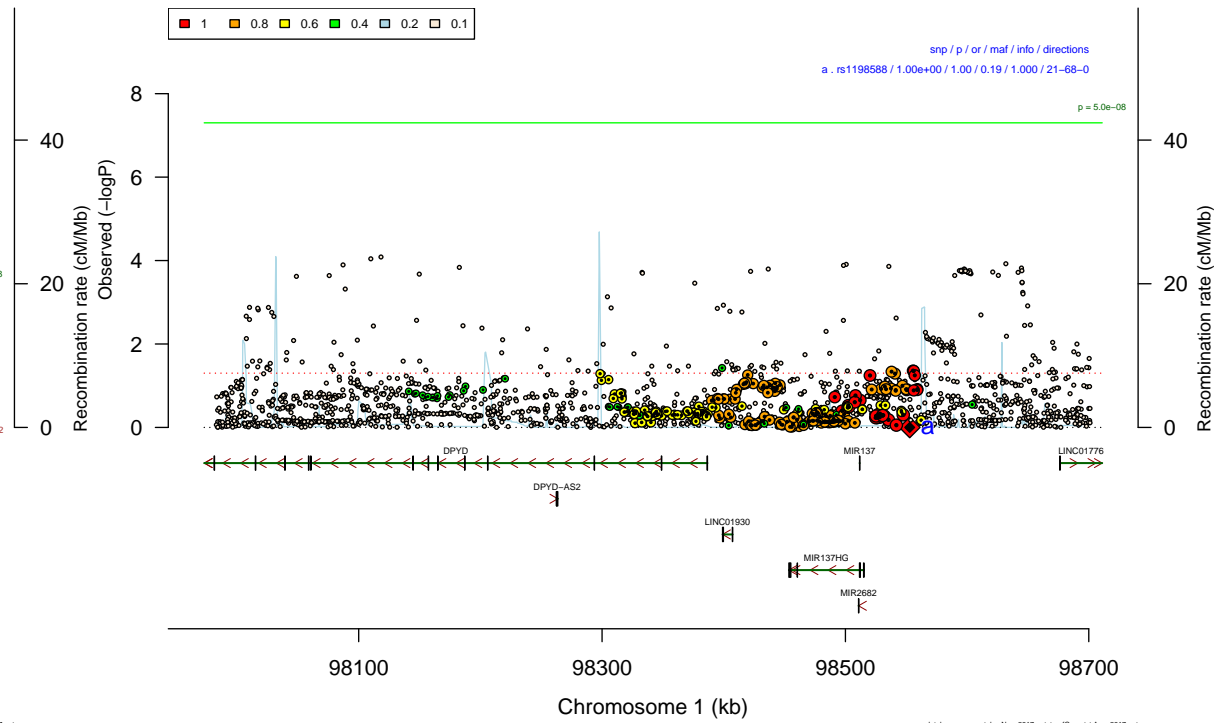

### SCZ\_uncond-rs13230189-chr7

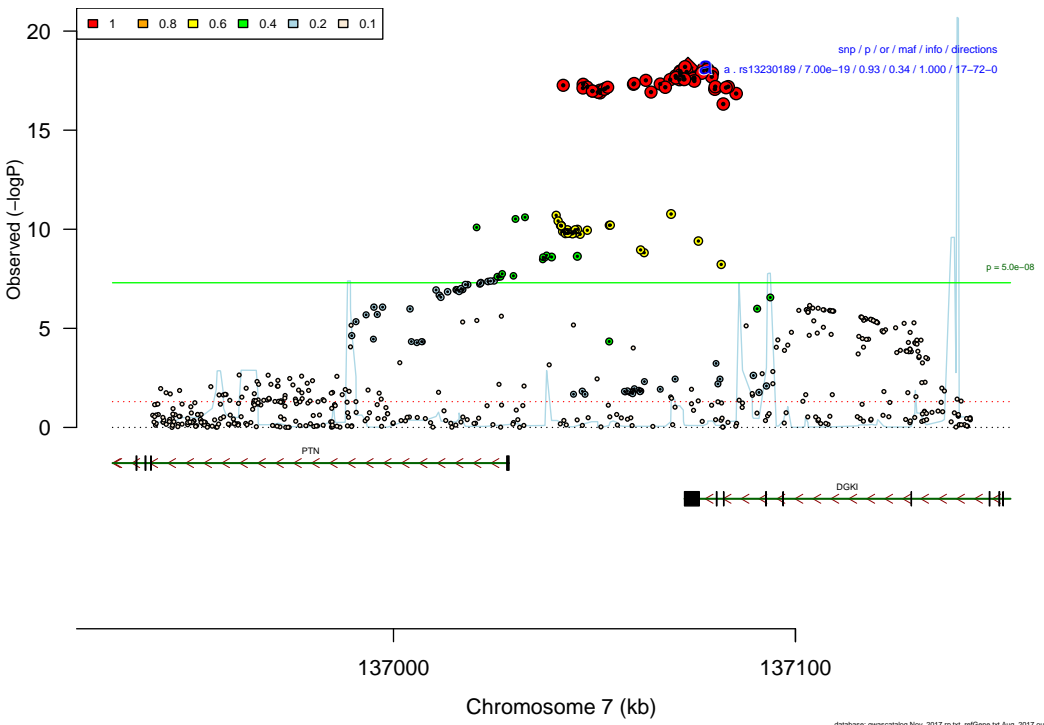

### SCZ\_cond\_rs13230189-chr7

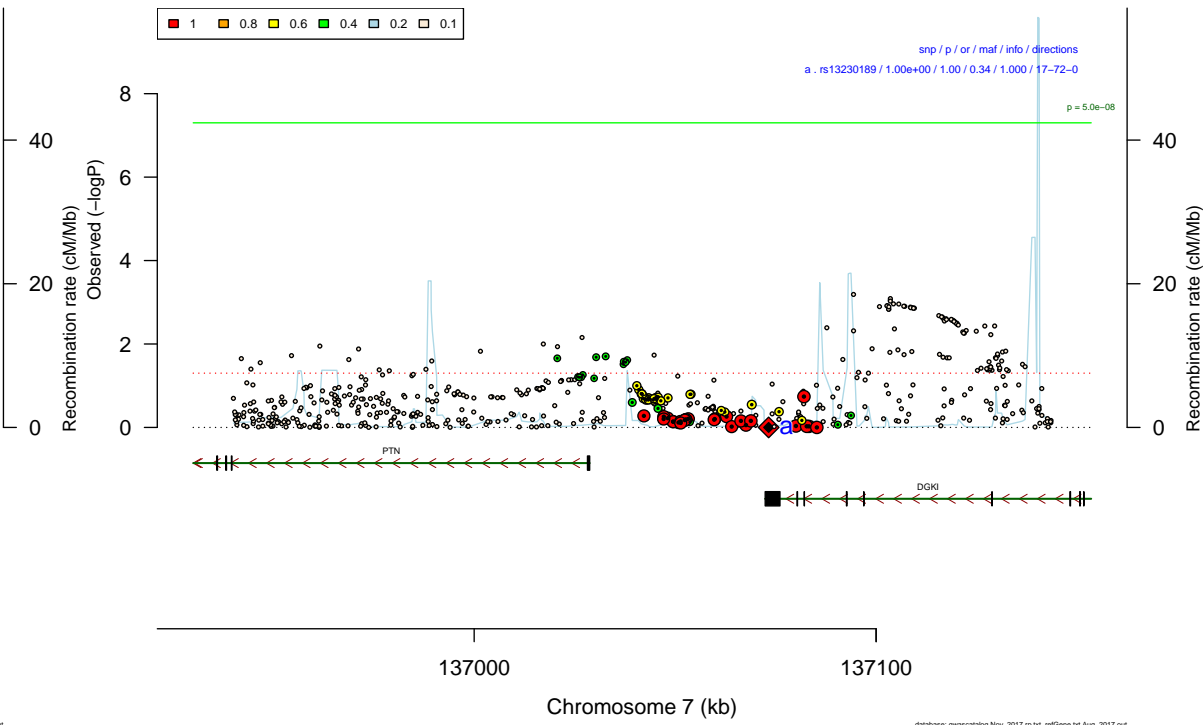

### SCZ\_uncond-rs13262595-chr8

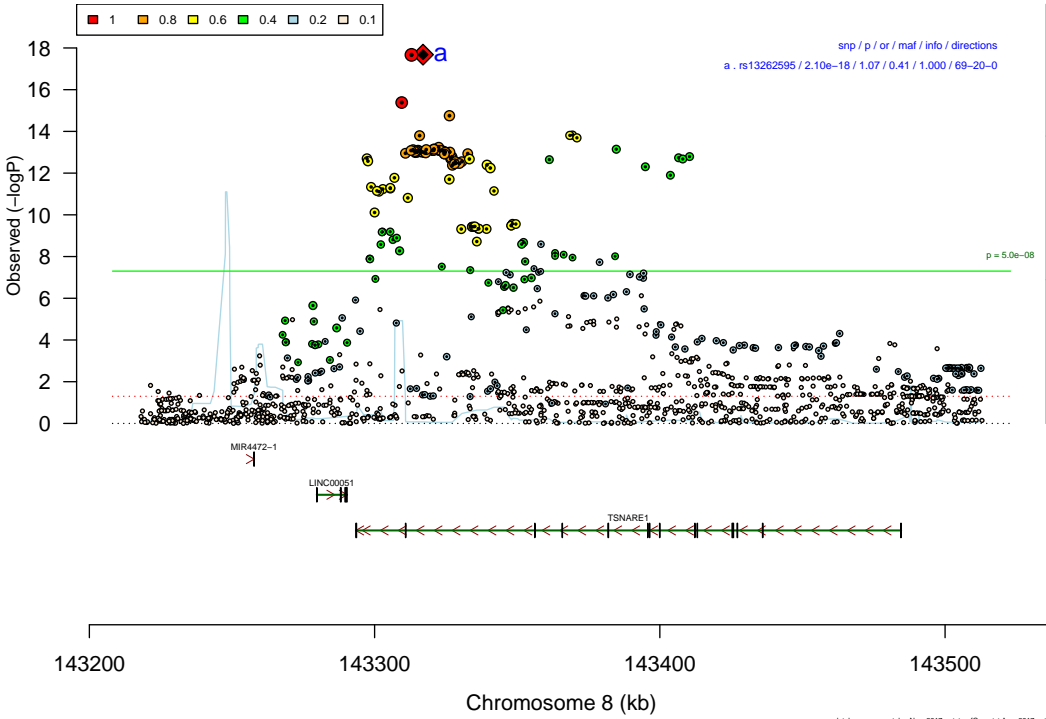

### SCZ\_cond\_rs13262595-chr8

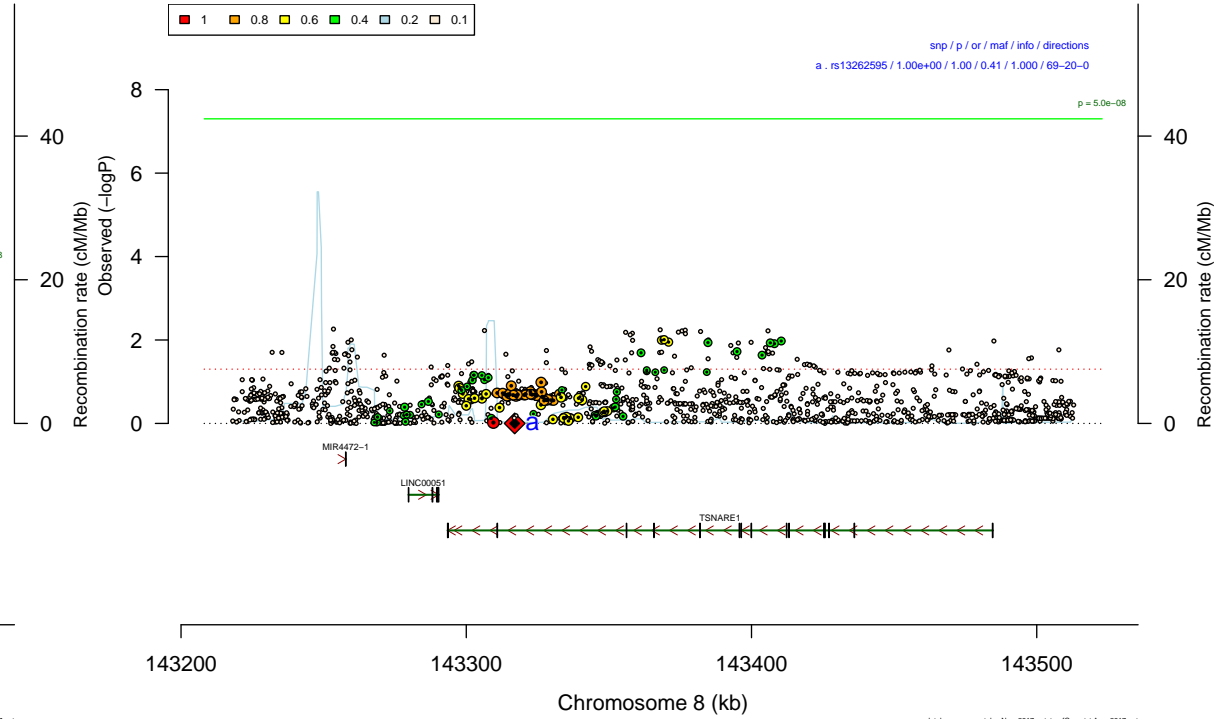

### SCZ\_uncond-rs12285419-chr11

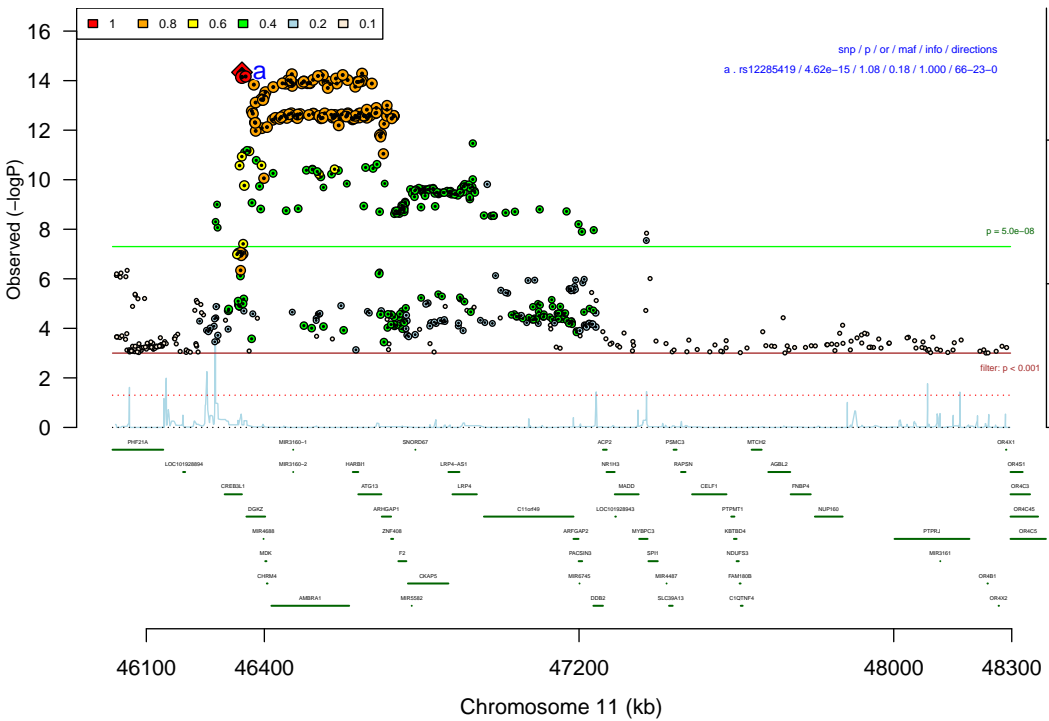

### SCZ\_cond\_rs12285419-chr11

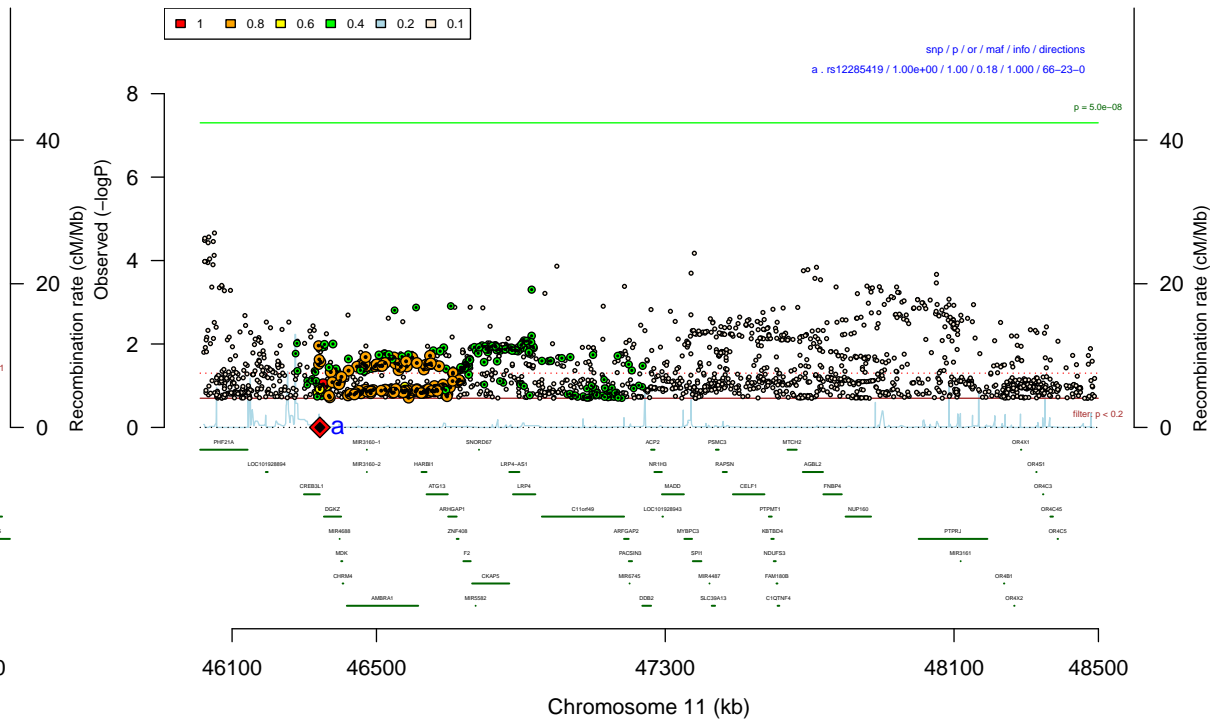

### SCZ\_uncond-rs2190864-chr14

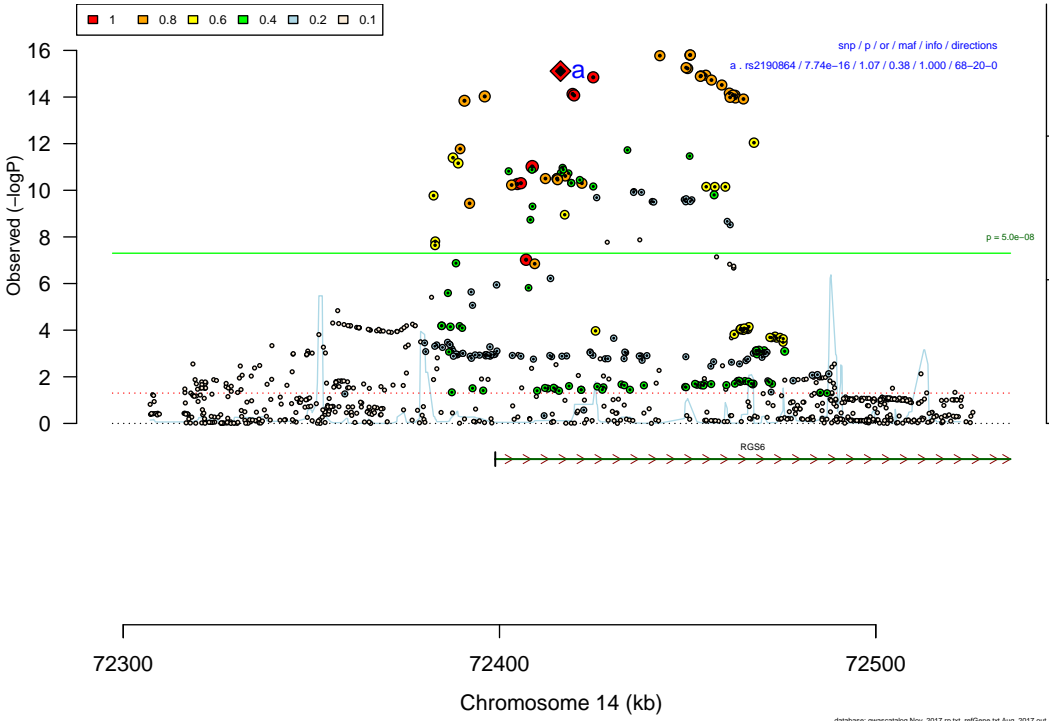

### SCZ\_cond\_rs2190864-chr14

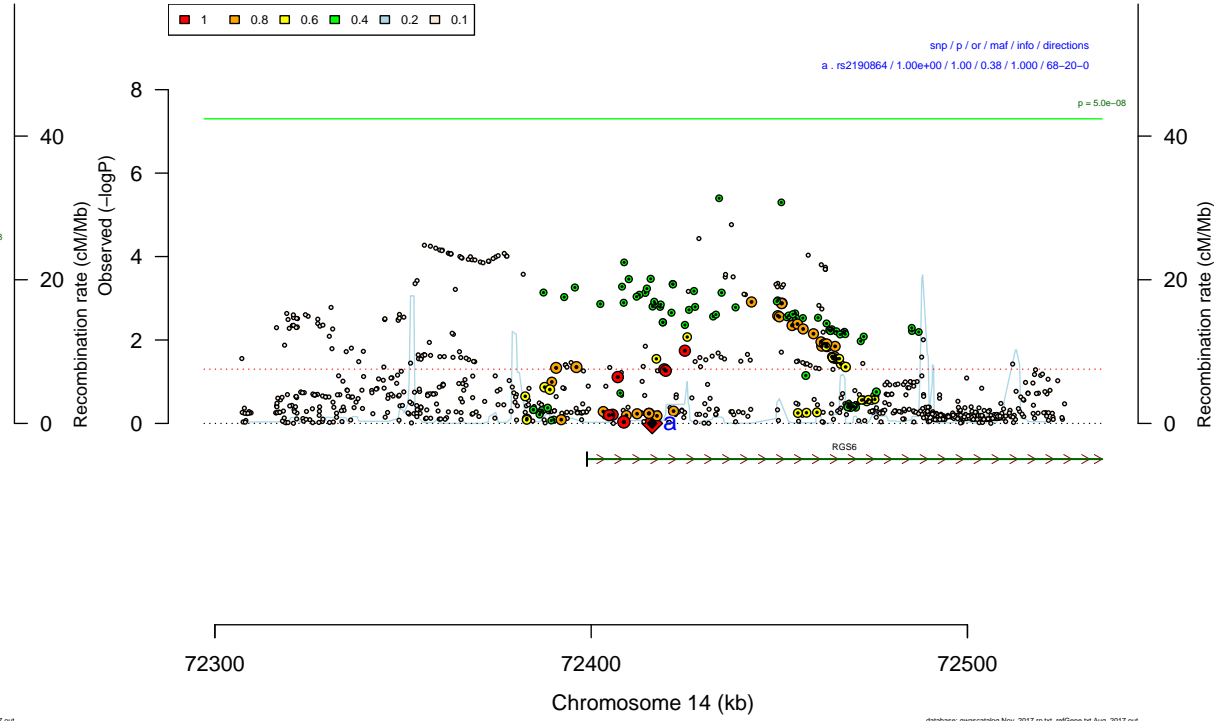

### SCZ\_uncond-rs12129573-chr1

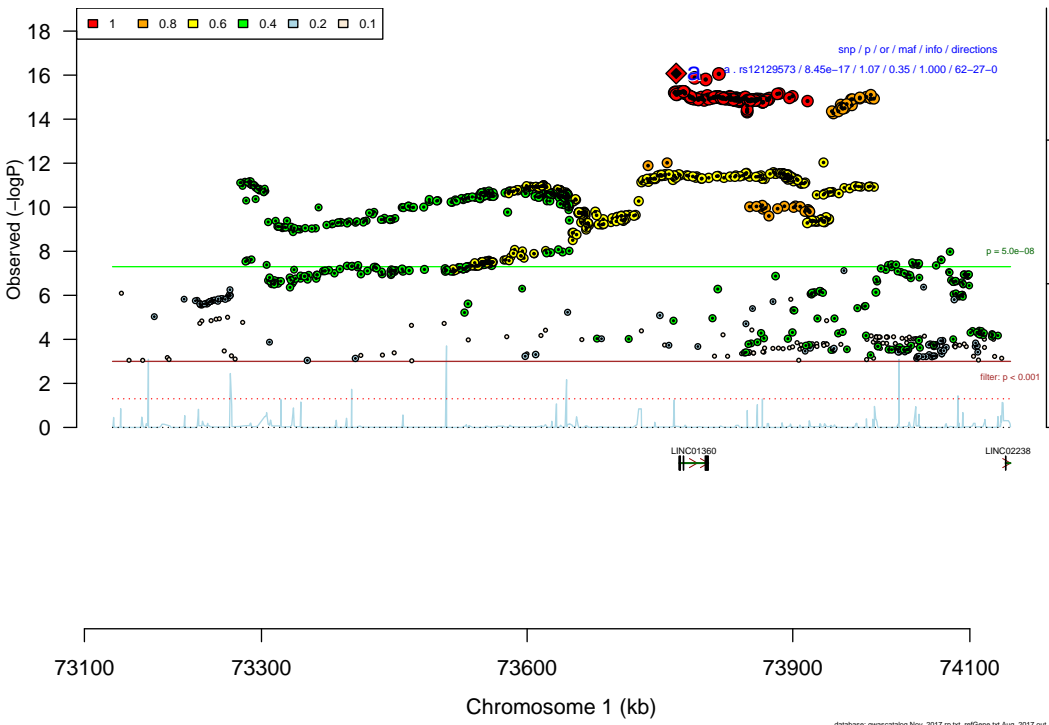

### SCZ\_cond\_rs12129573-chr1

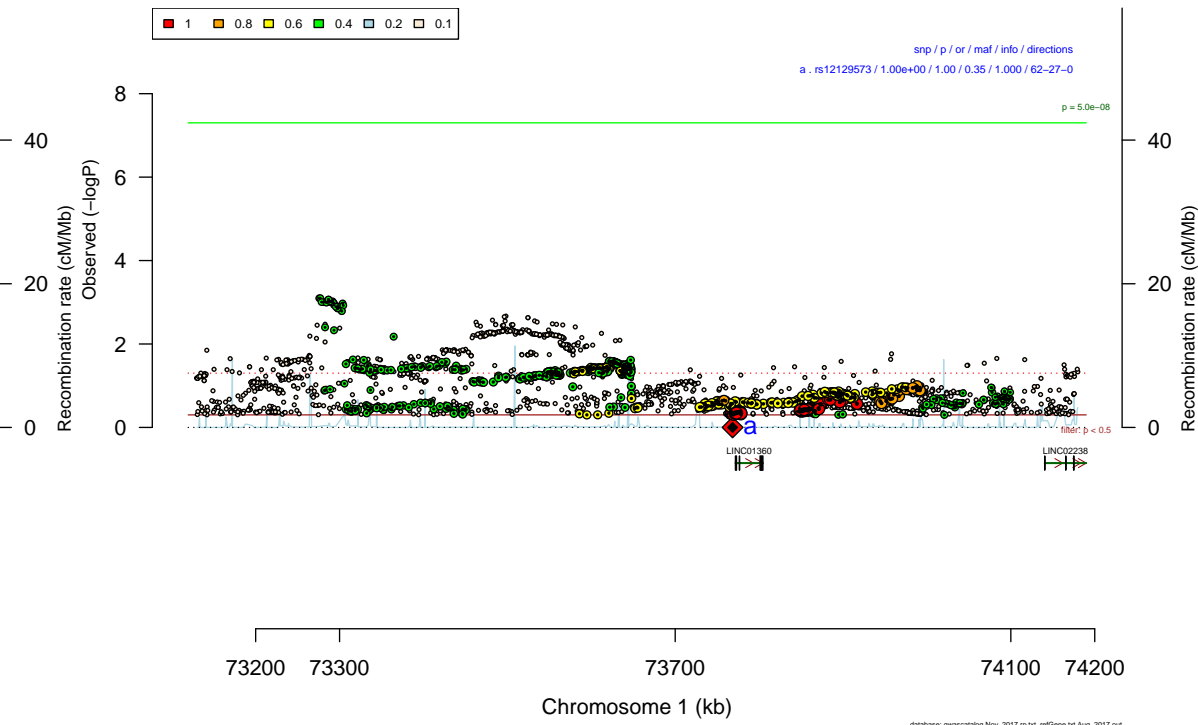



### SCZ\_uncond-rs7701440-chr5

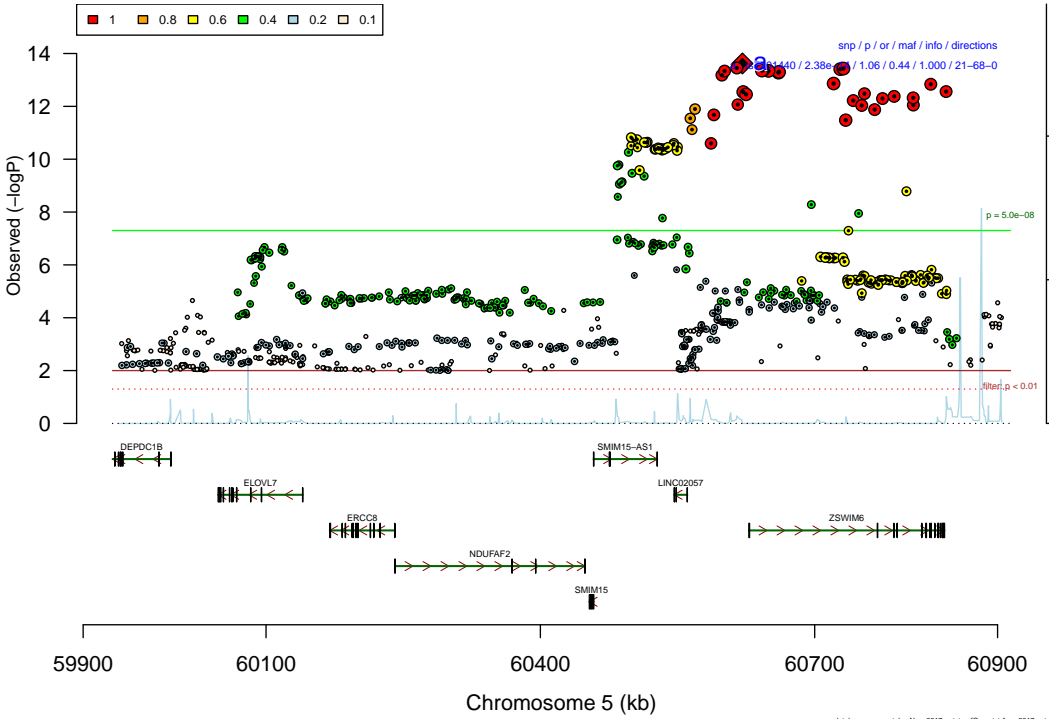

### SCZ\_cond\_rs7701440-chr5

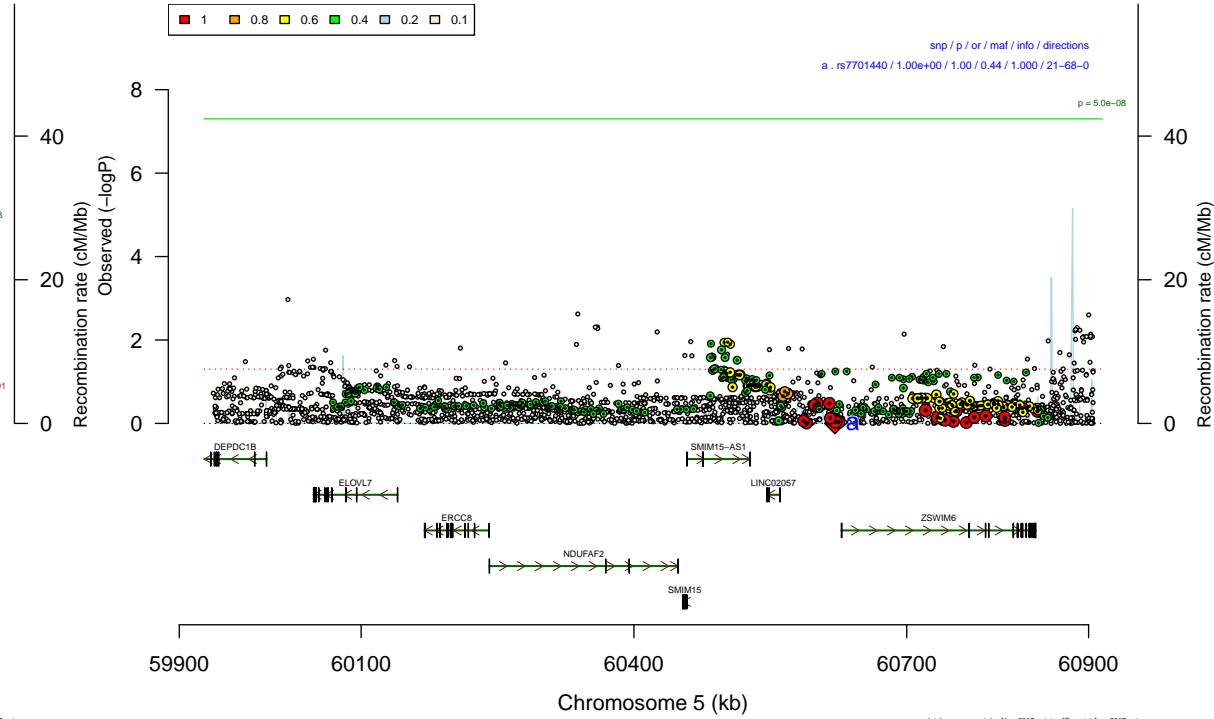

### SCZ\_uncond-rs7647398-chr3

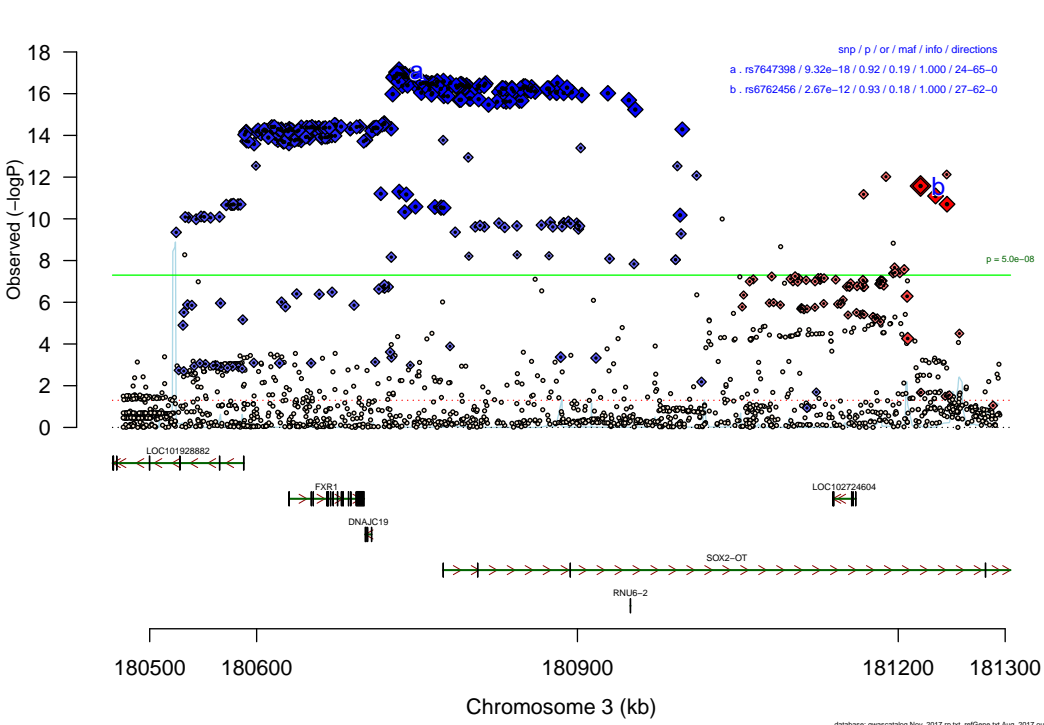

### SCZ\_cond\_rs7647398-chr3

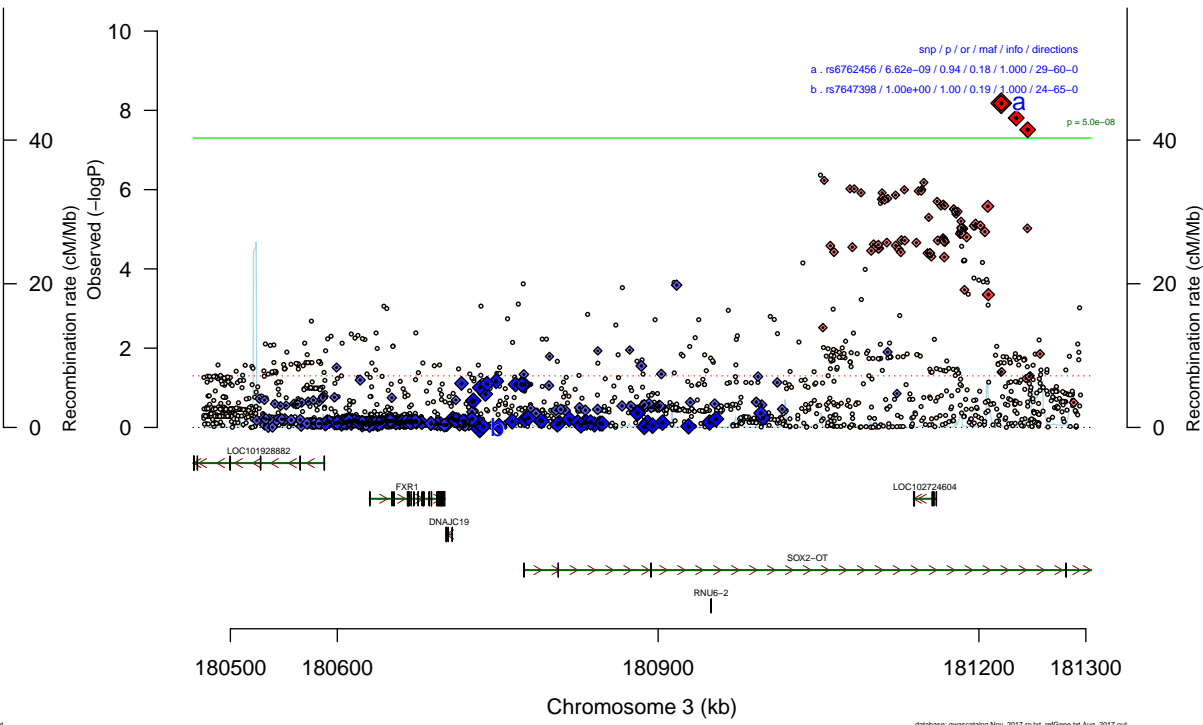

### SCZ\_cond\_rs7647398-rs6762456-chr3

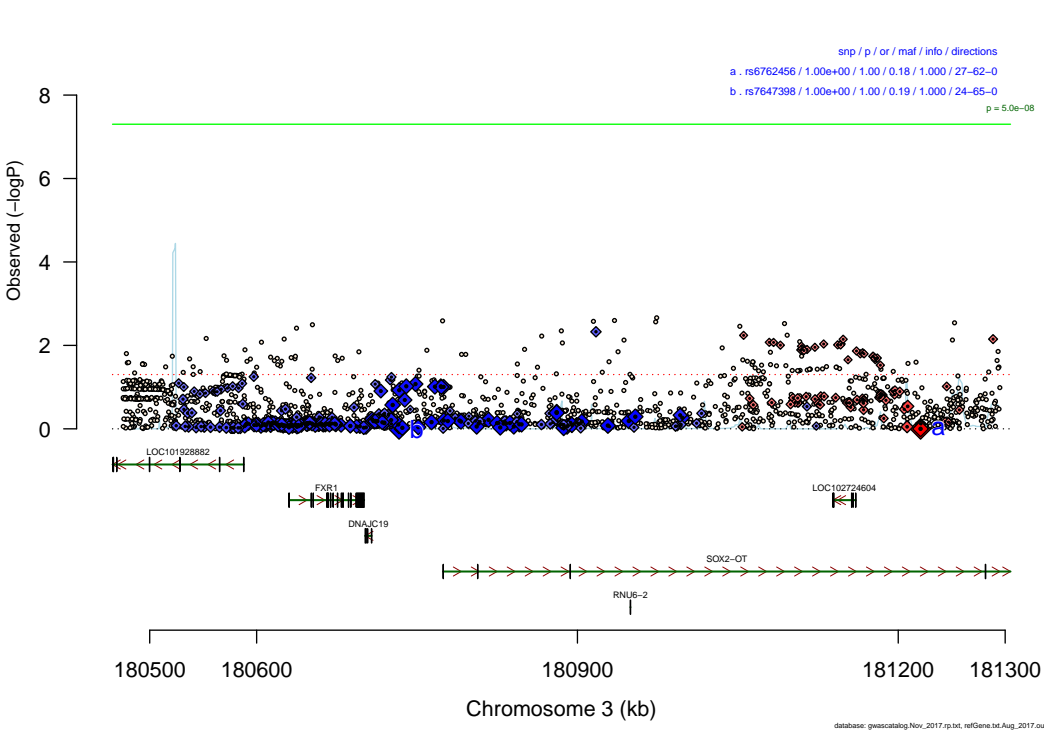

### SCZ\_uncond-rs6482437-chr10

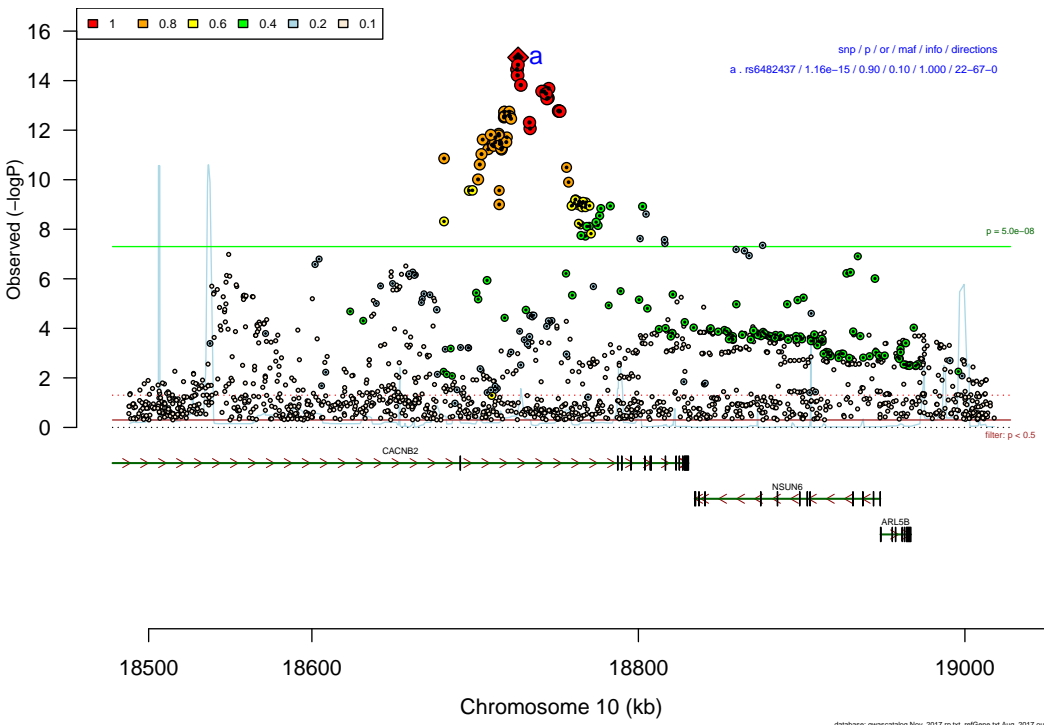

### SCZ\_cond\_rs6482437-chr10

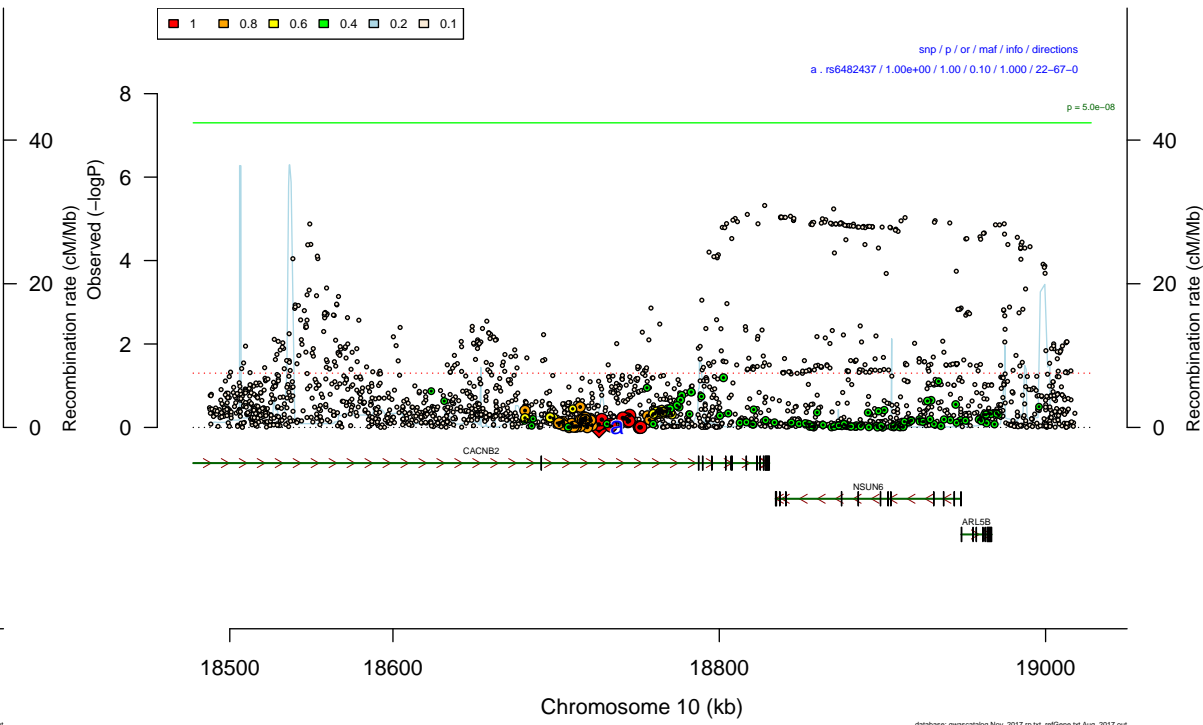

### SCZ\_uncond-rs778371-chr2

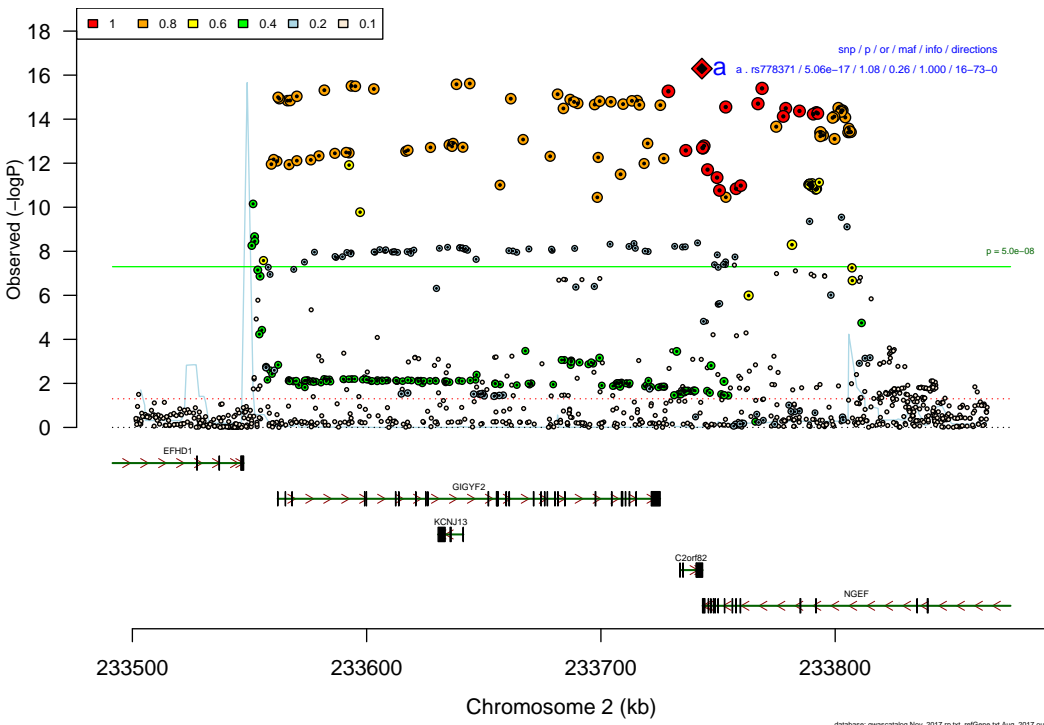

### SCZ\_cond\_rs778371-chr2

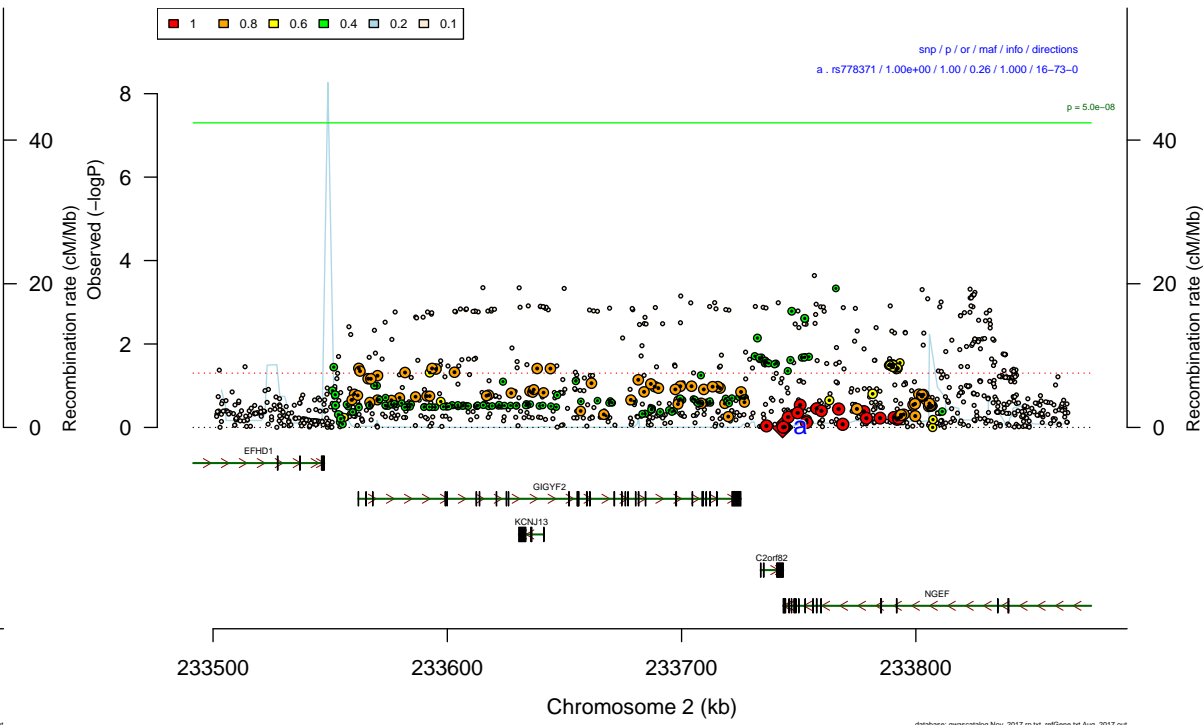

### SCZ\_uncond-rs2514218-chr11

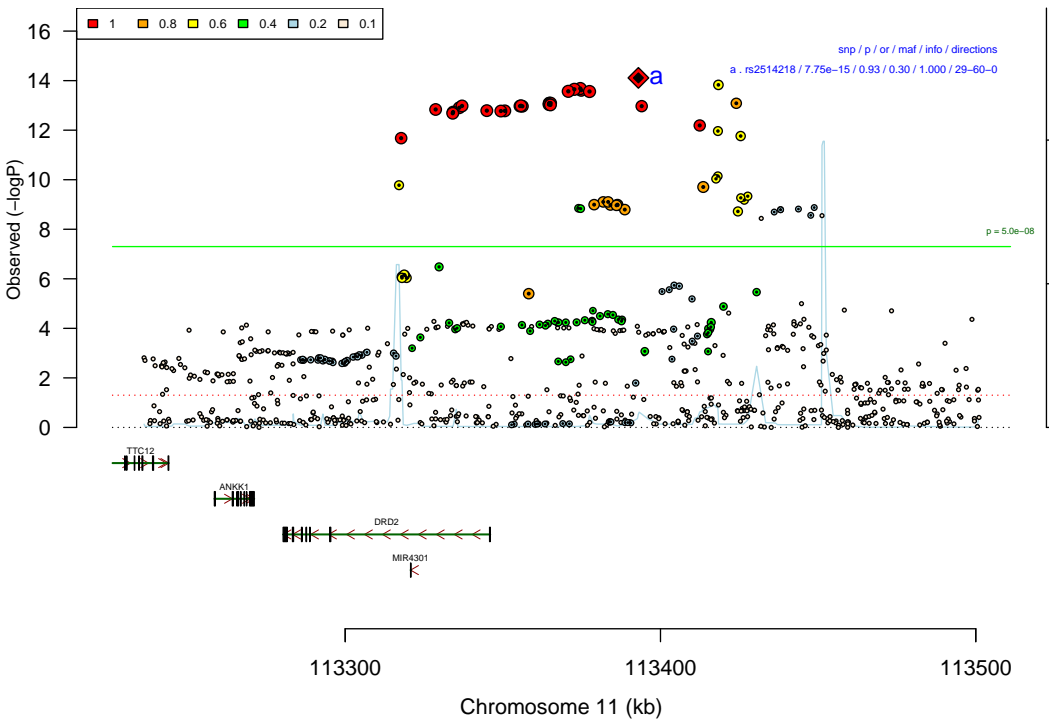

### SCZ\_cond\_rs2514218-chr11

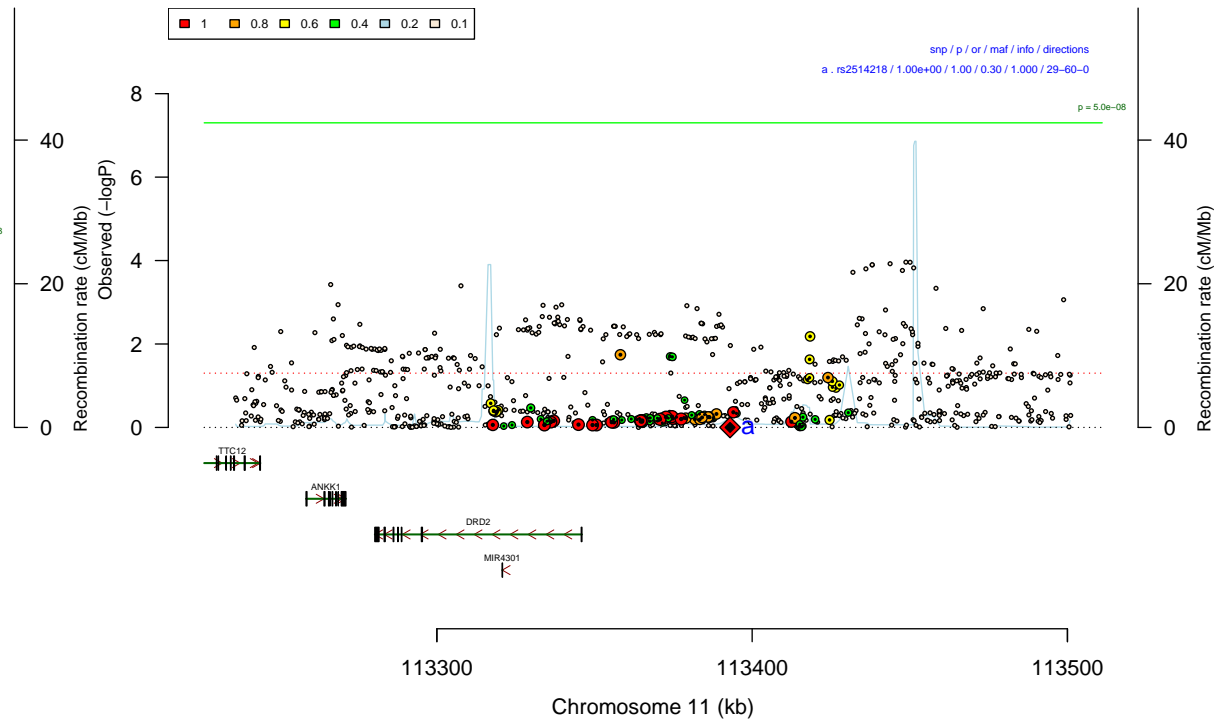

SCZ\_uncond-rs6943762-chr7

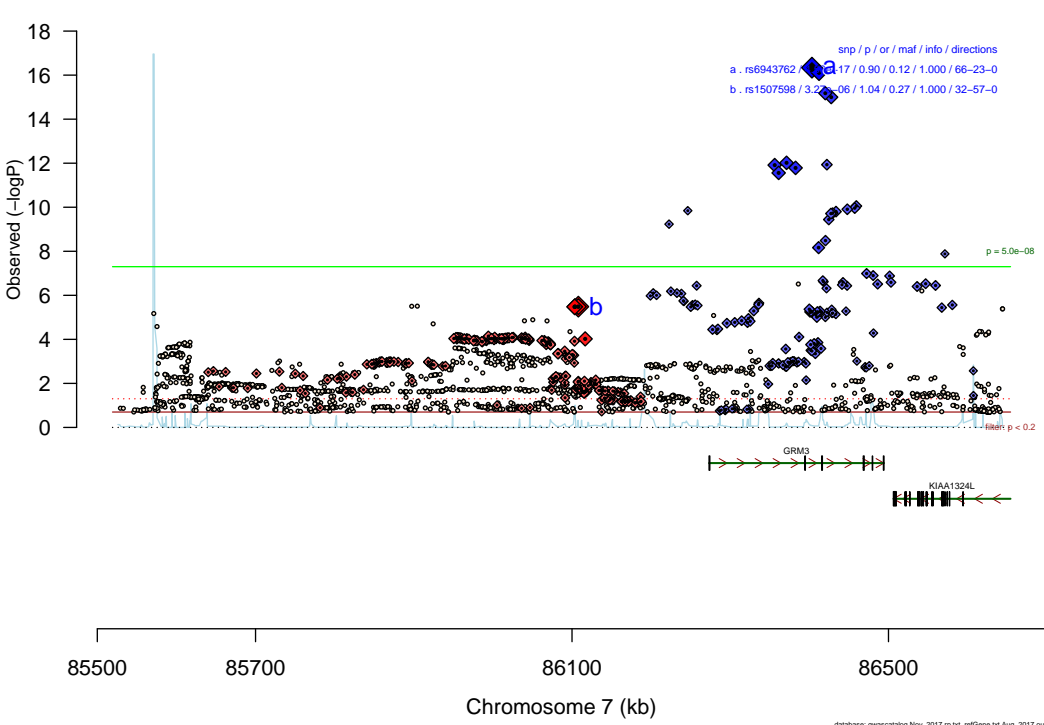

SCZ\_cond\_rs6943762-chr7

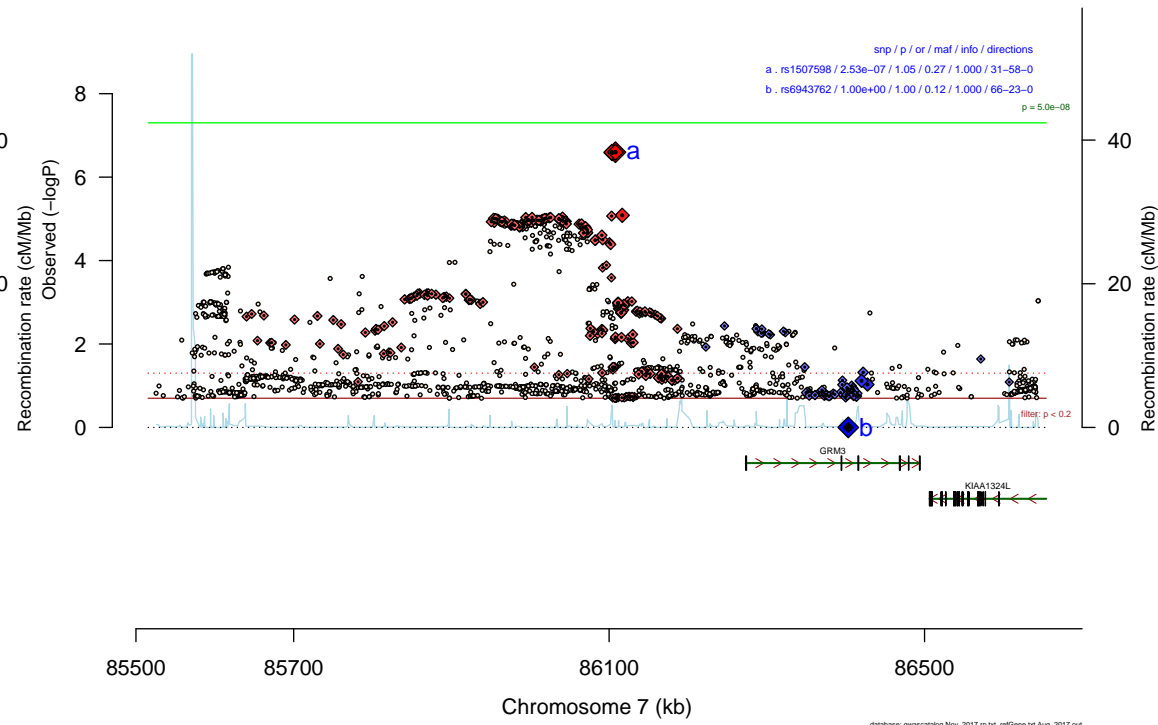

SCZ\_cond\_rs6943762-rs1507598-chr7

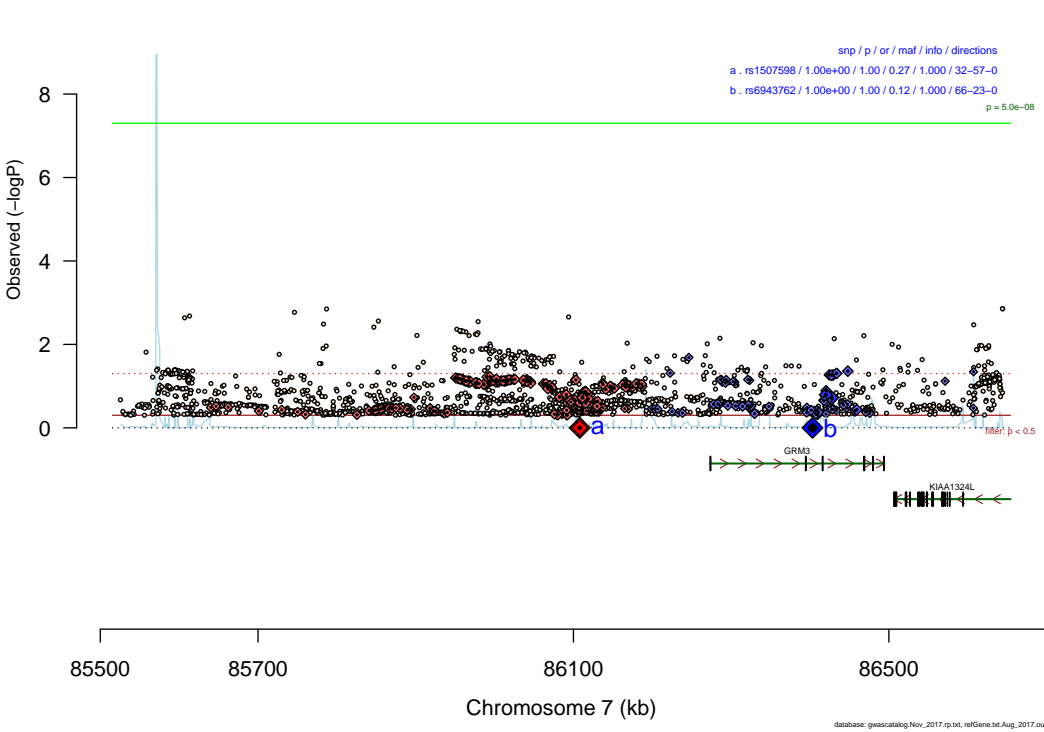

SCZ\_uncond-rs6065094-chr20

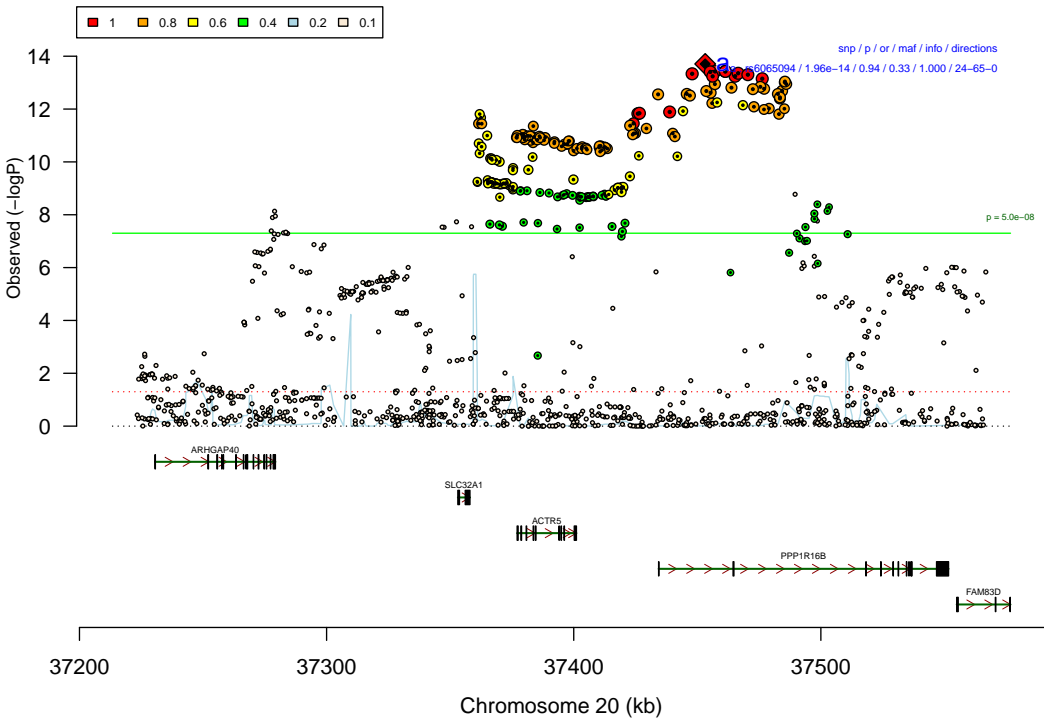

SCZ\_cond\_rs6065094-chr20

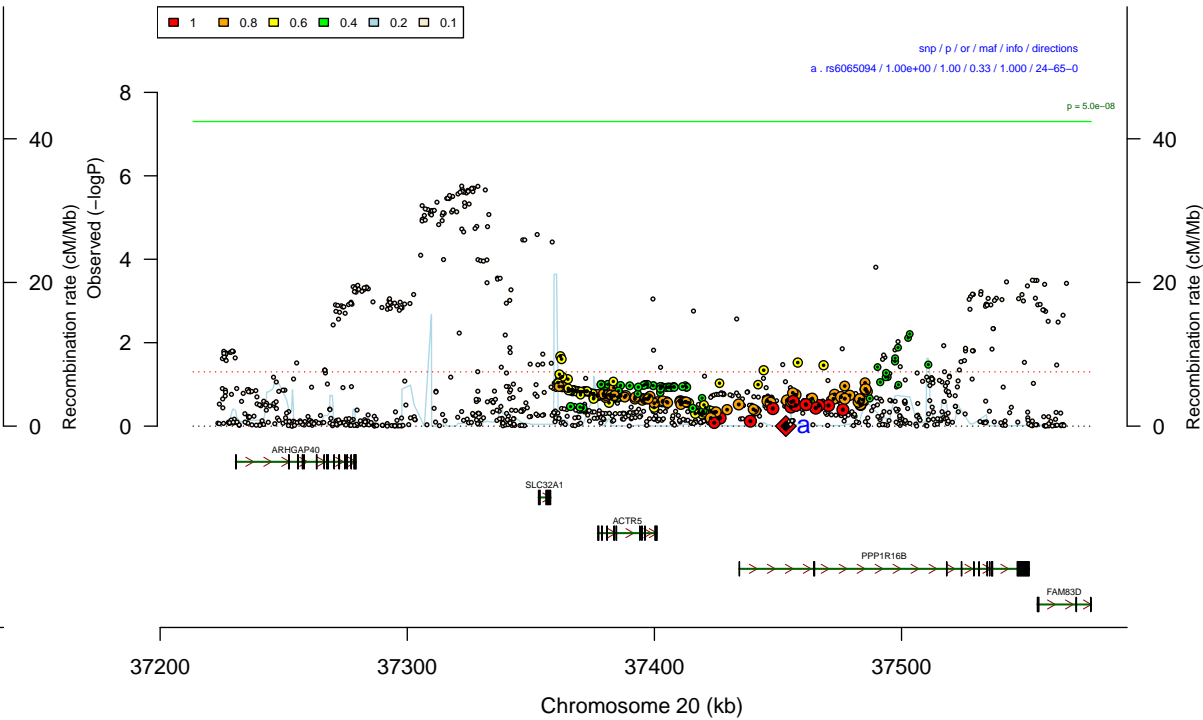

### SCZ\_uncond-rs2456020-chr15

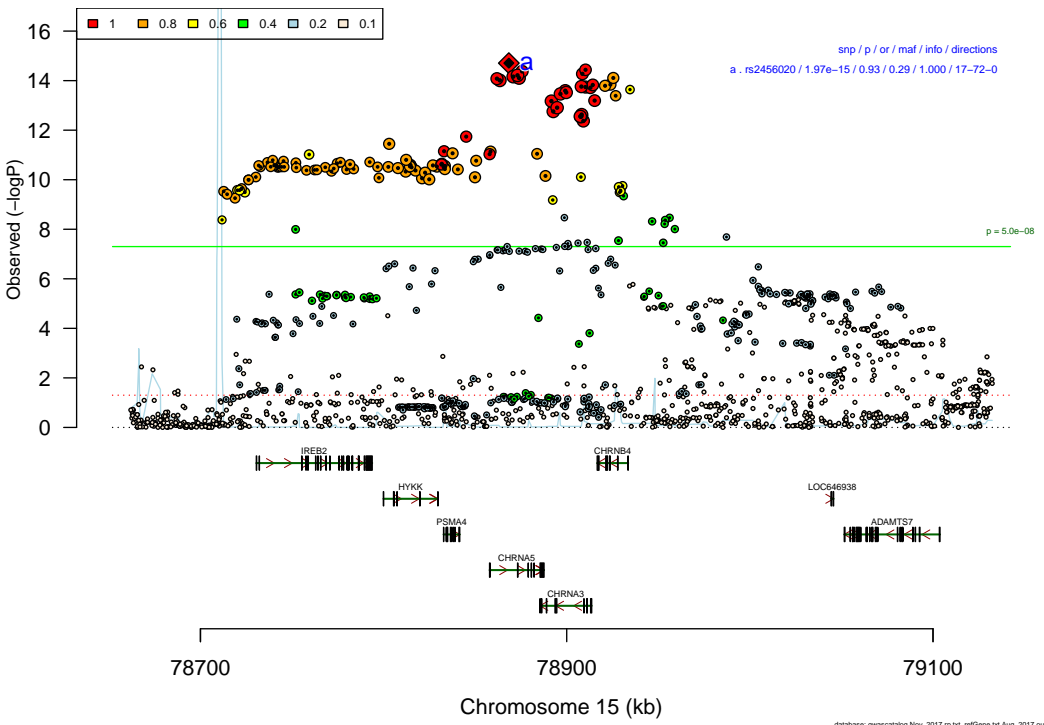

### SCZ\_cond\_rs2456020-chr15

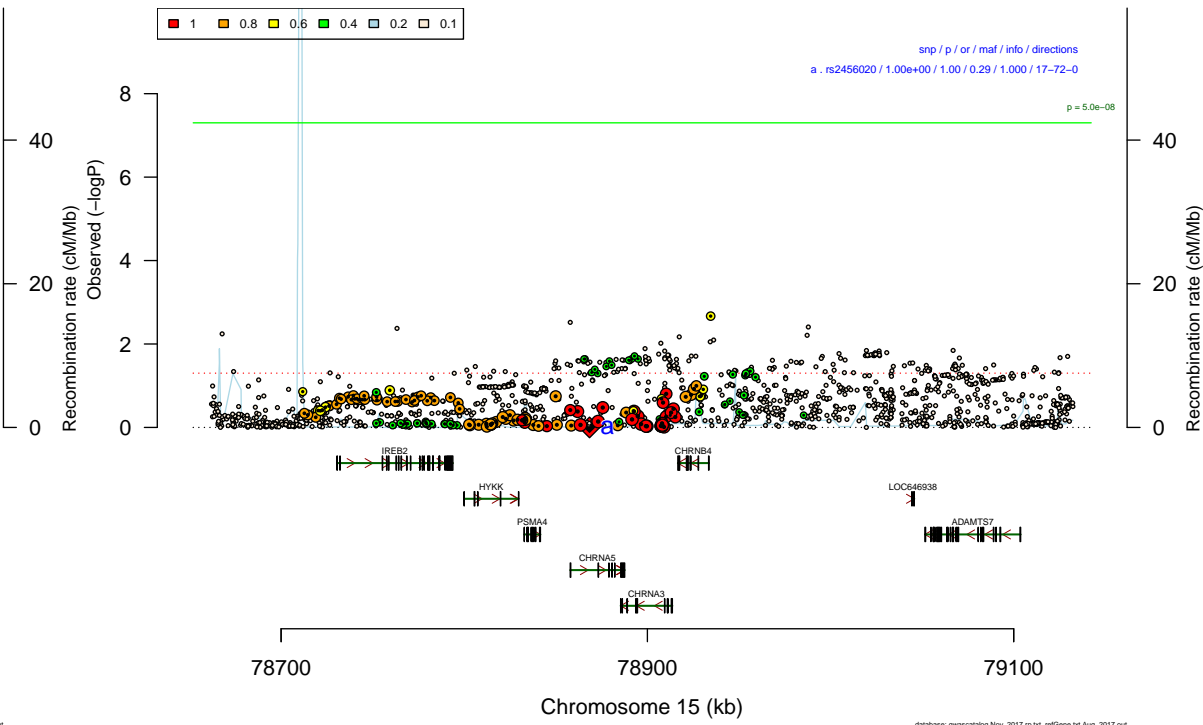



### SCZ\_uncond-rs4766428-chr12

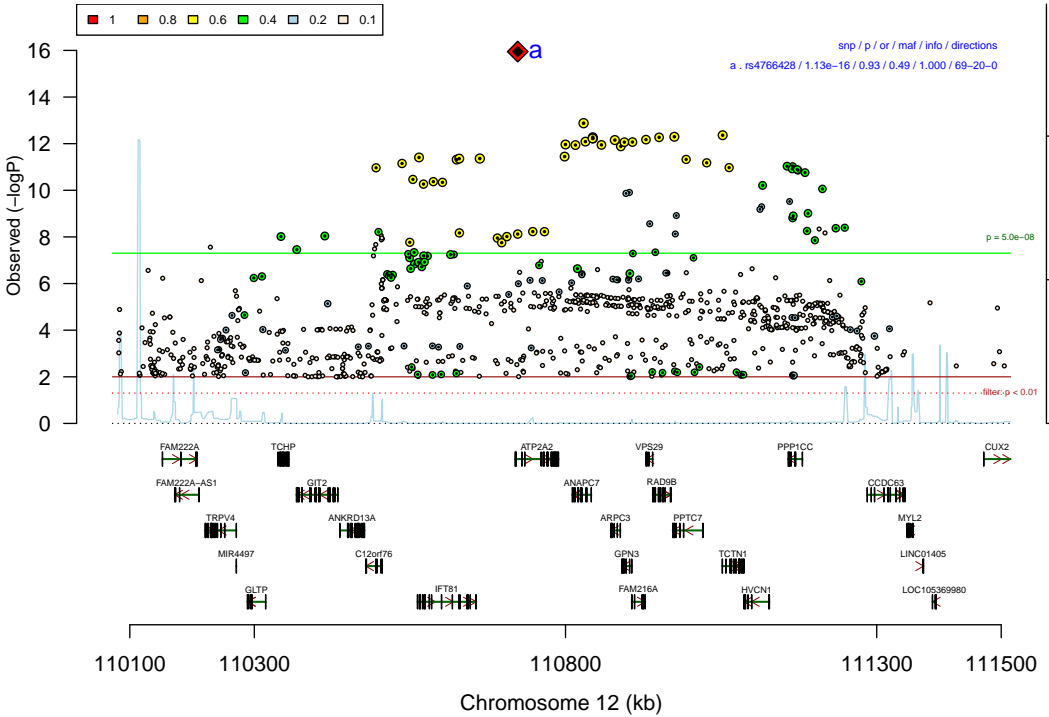

### SCZ\_cond\_rs4766428-chr12

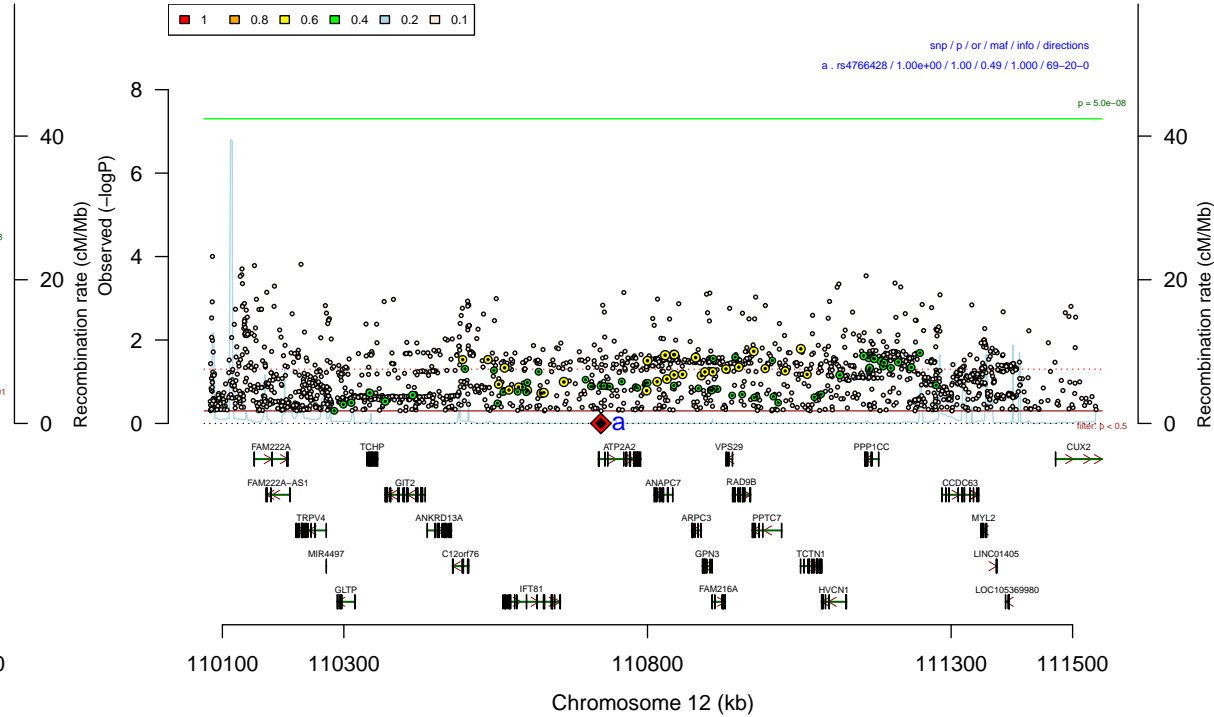

### SCZ\_uncond-rs11210892-chr1

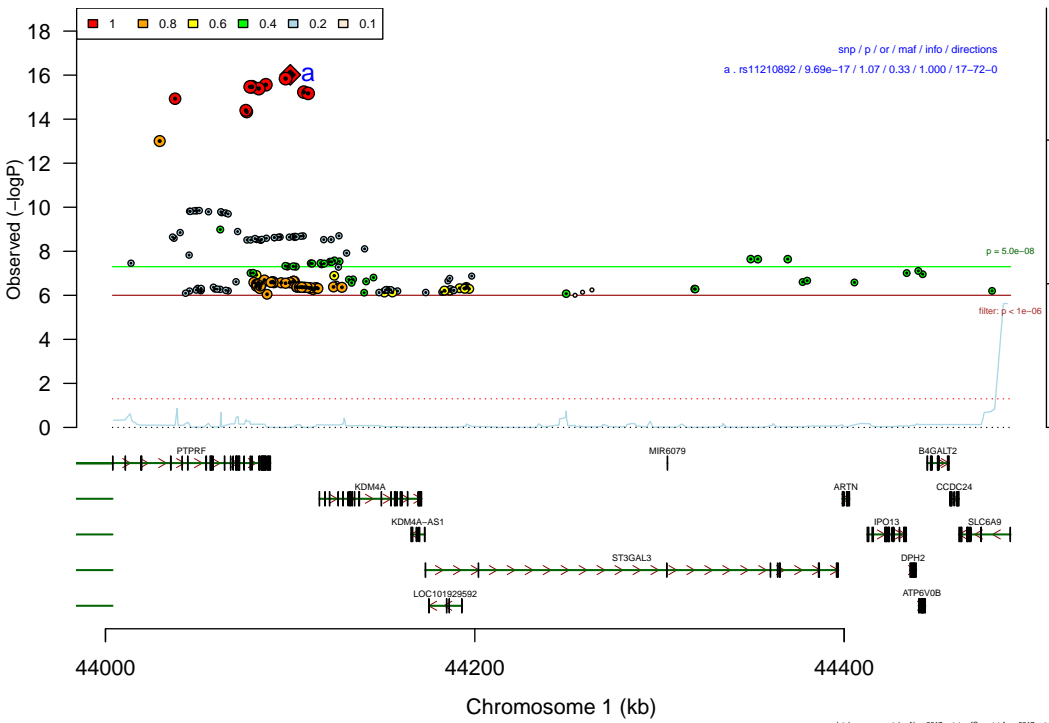

### SCZ\_cond\_rs11210892-chr1

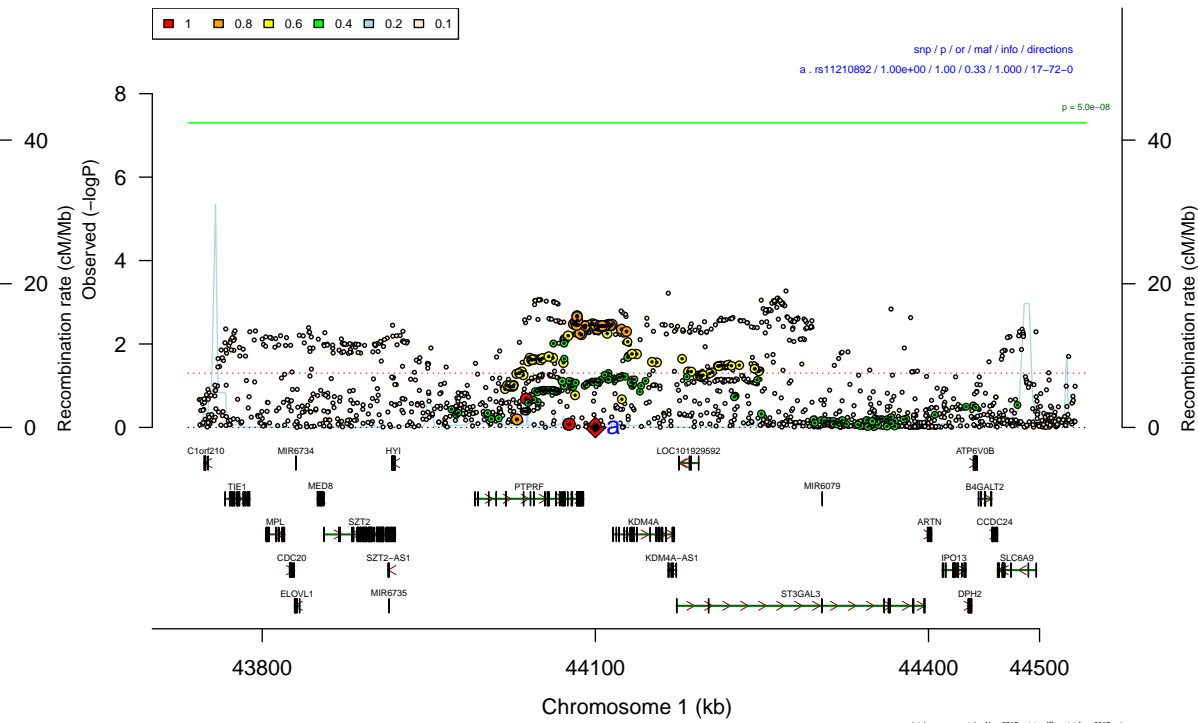

### SCZ\_uncond-rs1658810-chr2

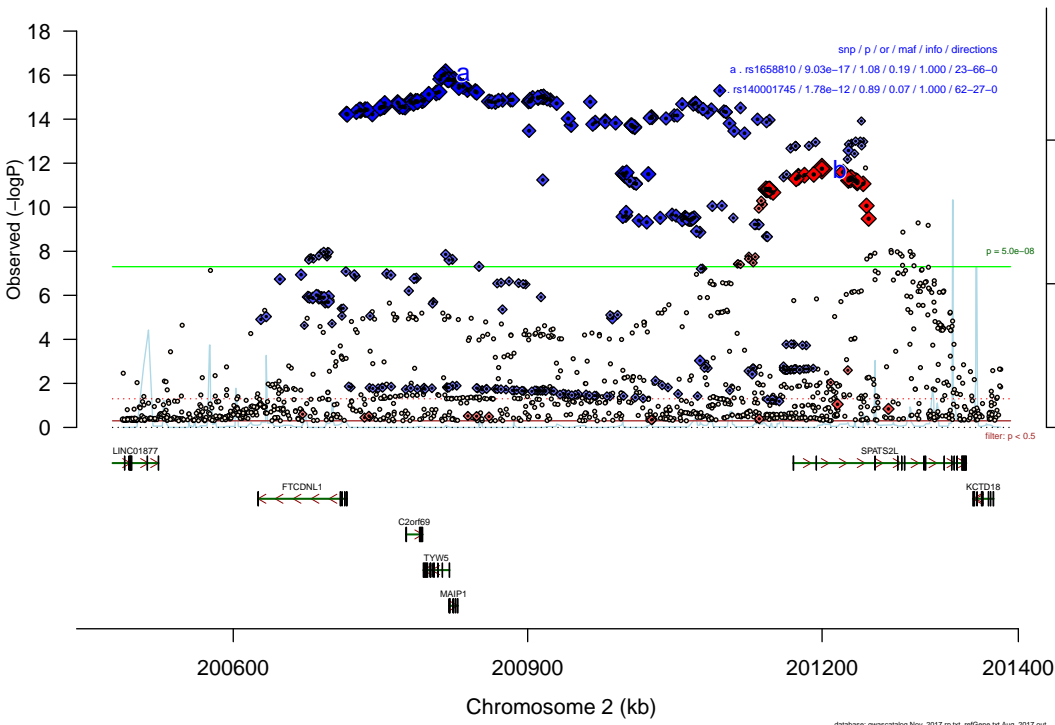

### SCZ\_cond\_rs1658810-chr2

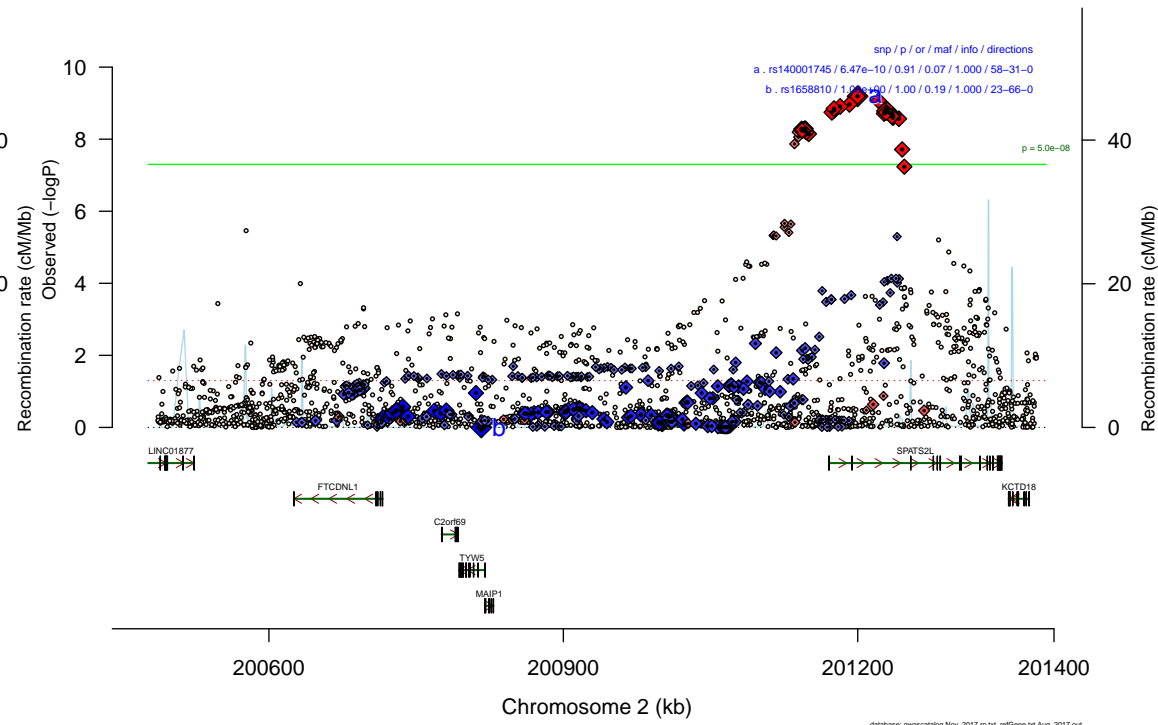

### SCZ\_cond\_rs1658810-rs140001745-chr2

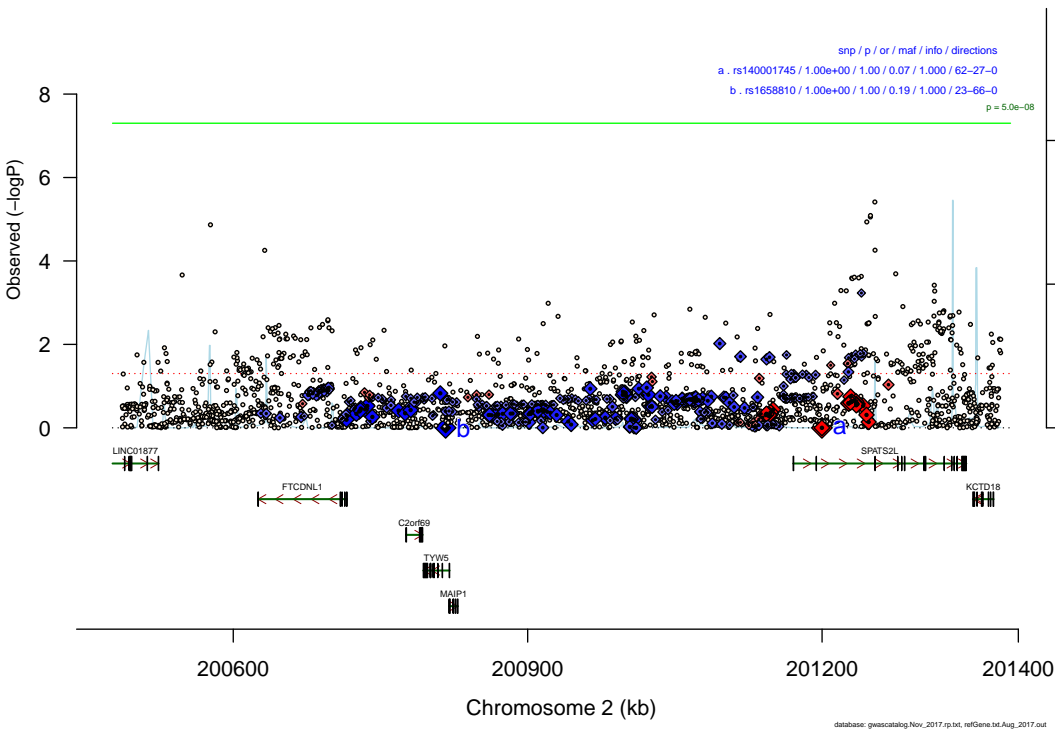

### SCZ\_uncond-rs72980087-chr18

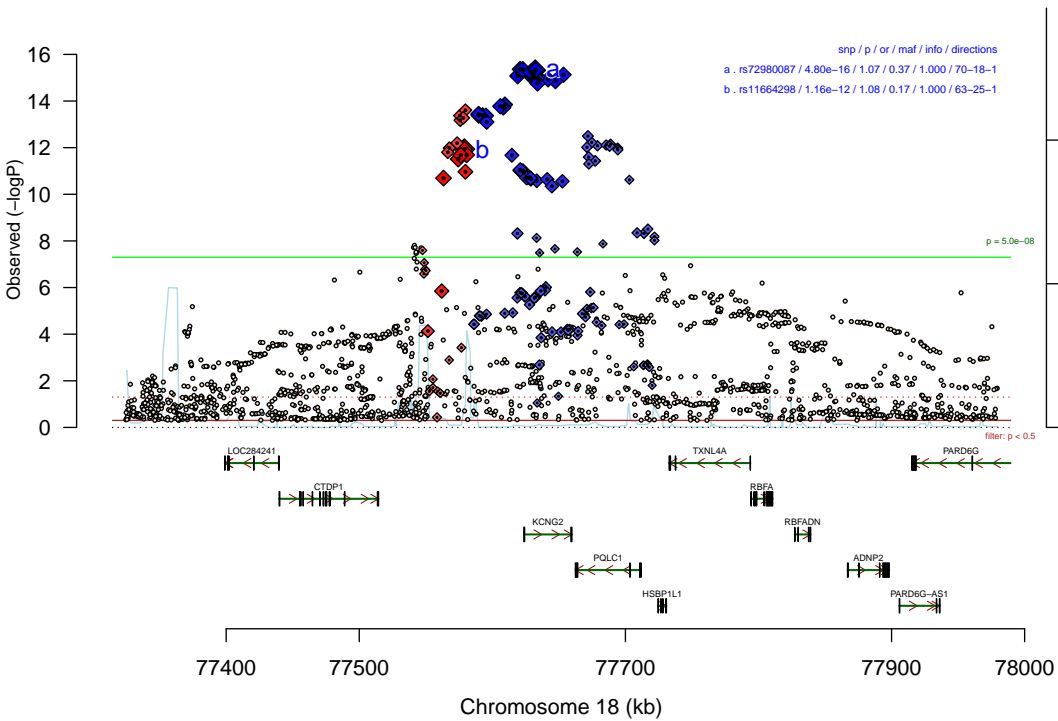

### SCZ\_cond\_rs72980087-chr18

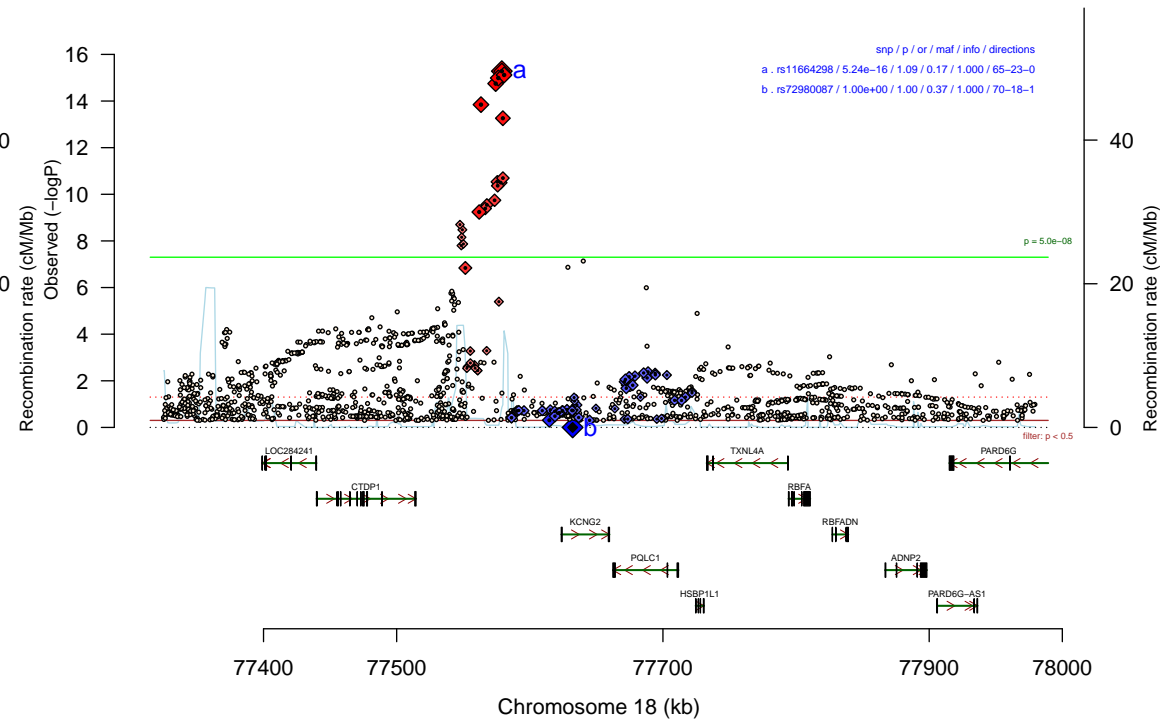

### SCZ\_cond\_rs72980087-rs11664298-chr18

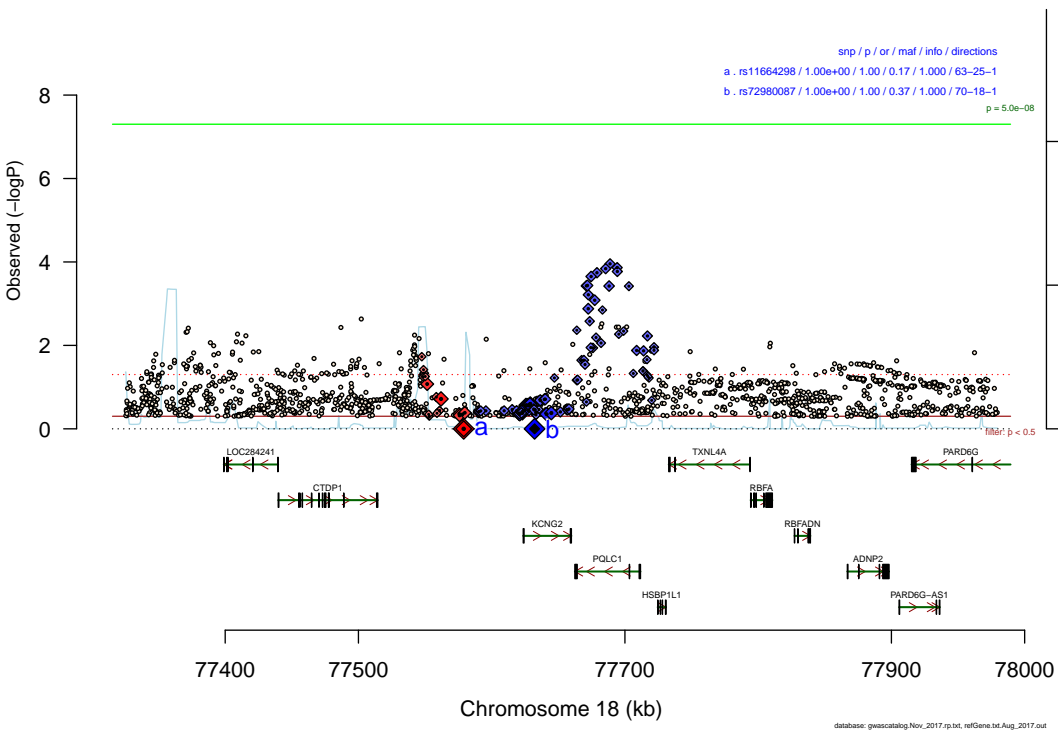

# SCZ\_uncond-rs3814883-chr16

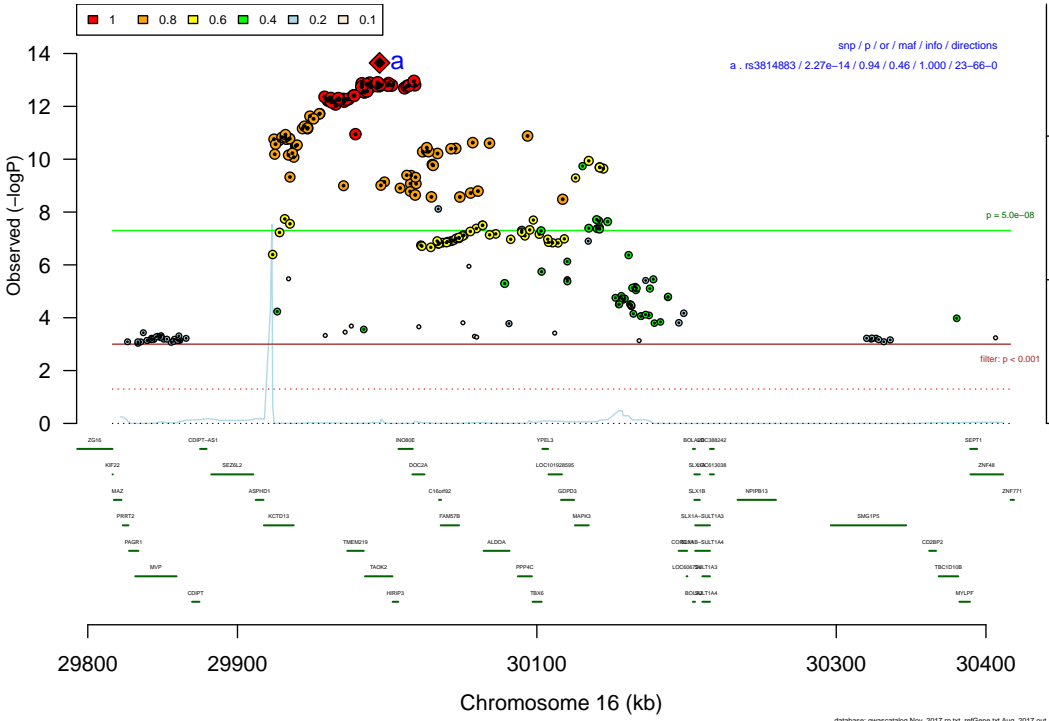

# SCZ\_cond\_rs3814883-chr16

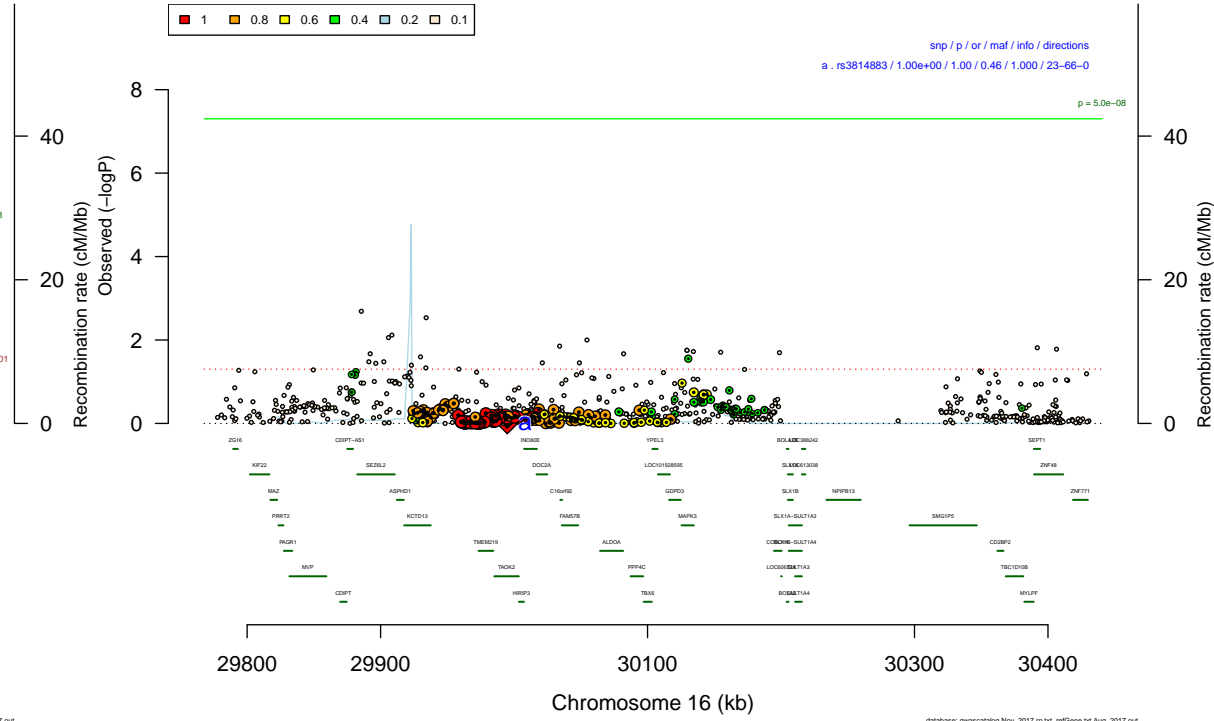

### SCZ\_uncond-rs1858999-chr19

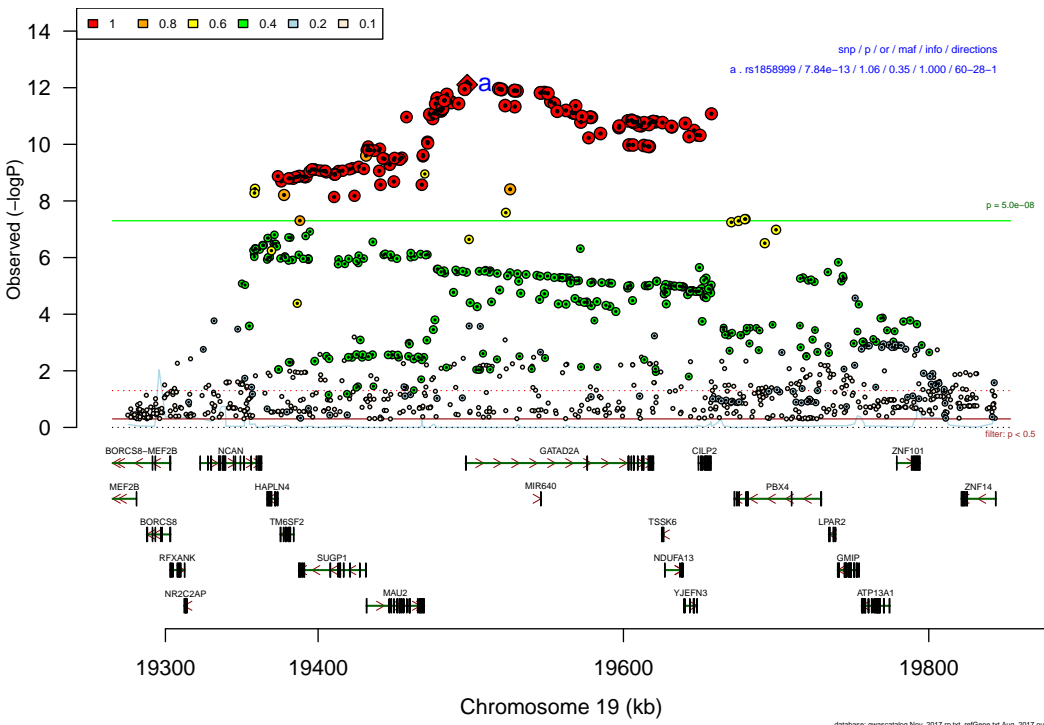

### SCZ\_cond\_rs1858999-chr19

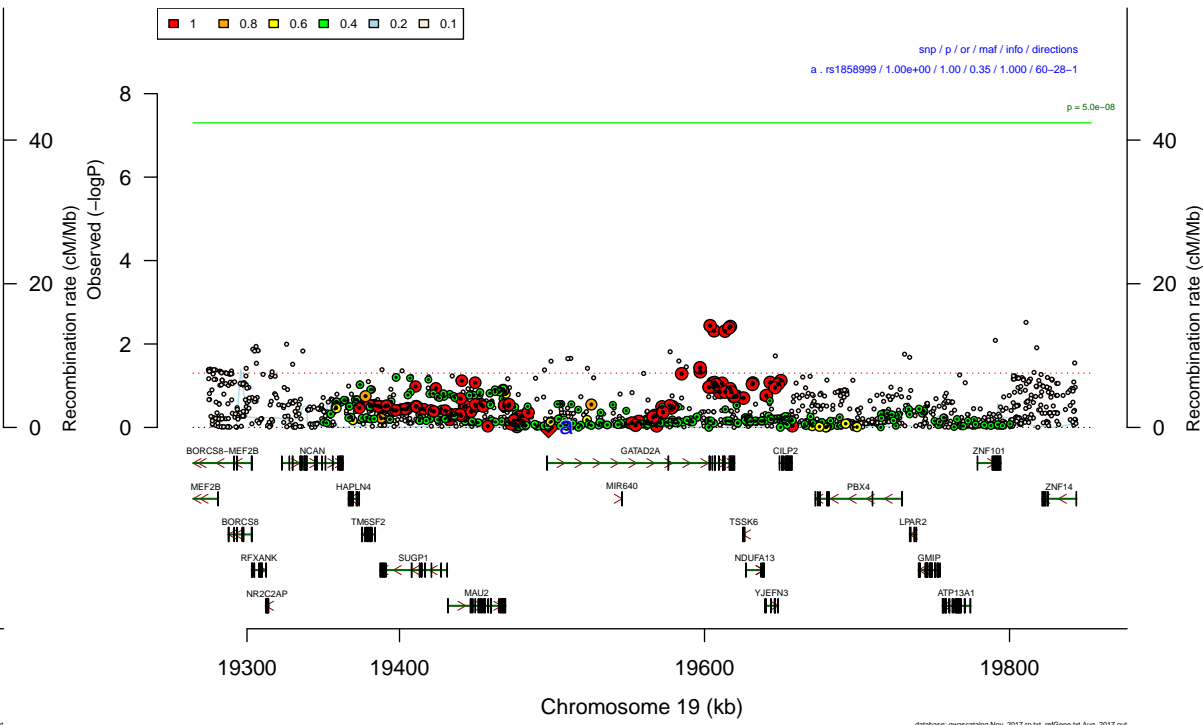

### SCZ\_uncond-rs41533650-chr4

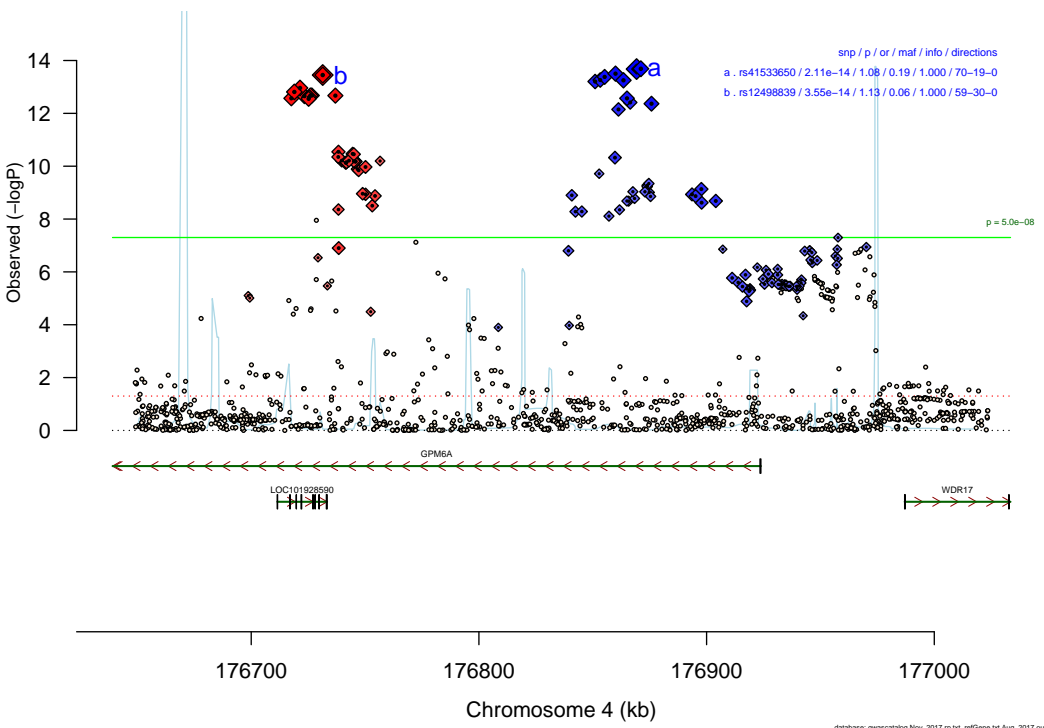

### SCZ\_cond\_rs41533650-chr4

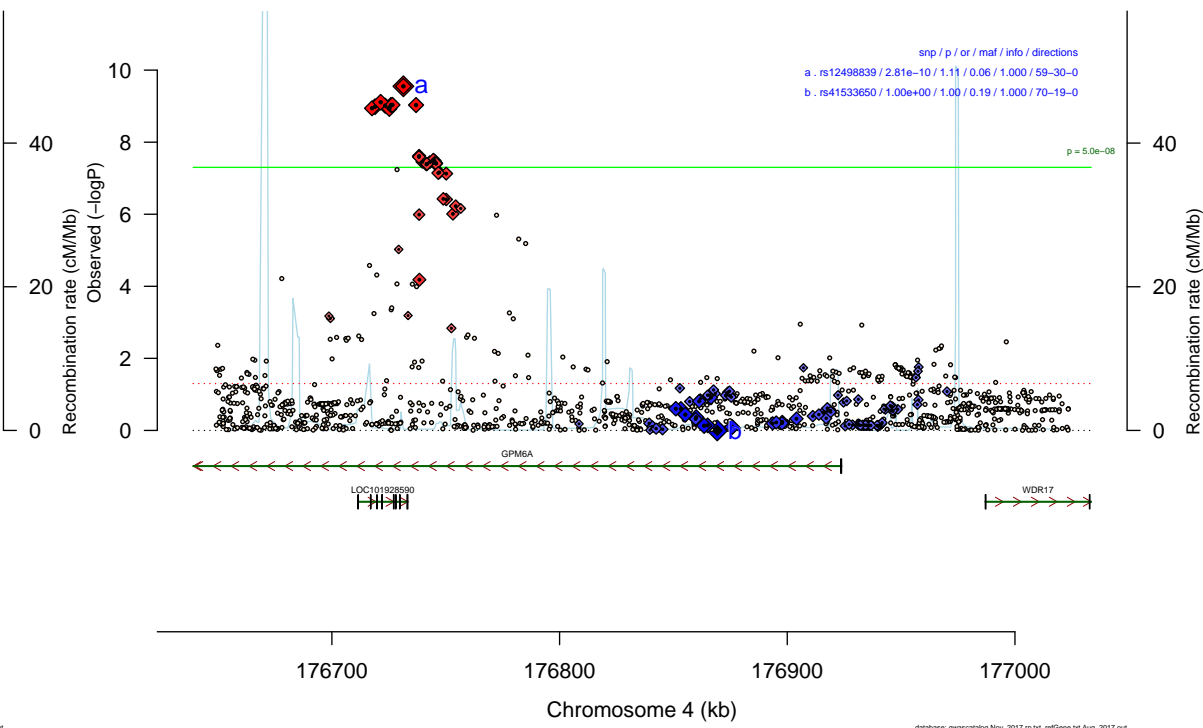

### SCZ\_cond\_rs41533650-rs12498839-chr4

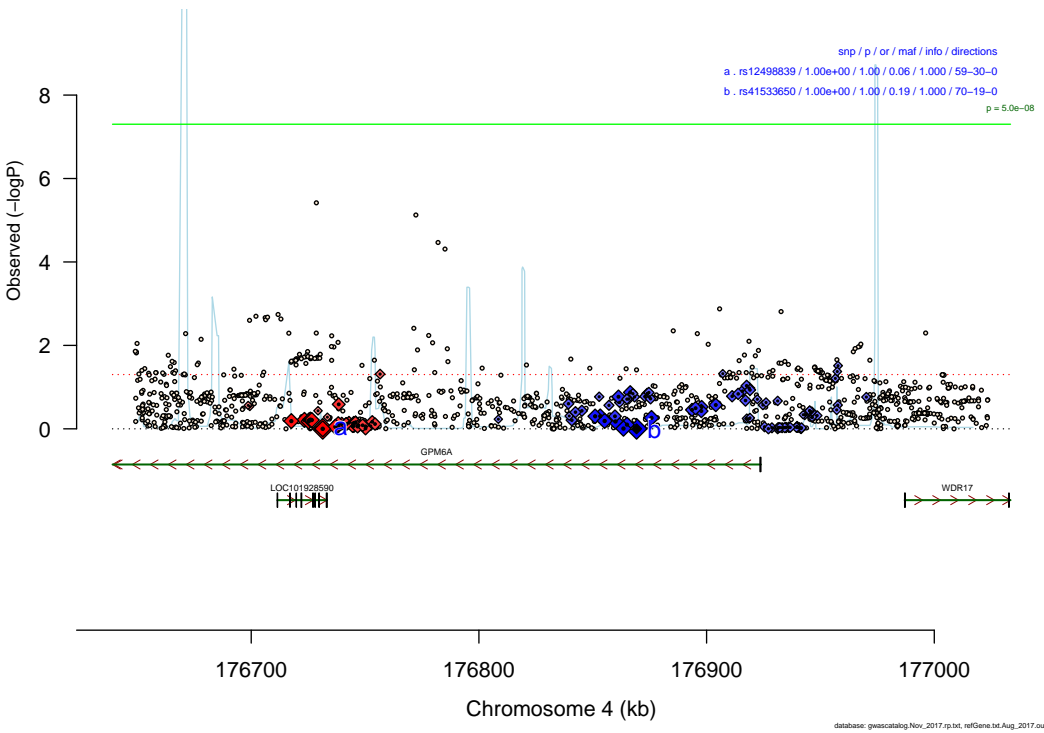

### SCZ\_uncond-rs56335113-chr1

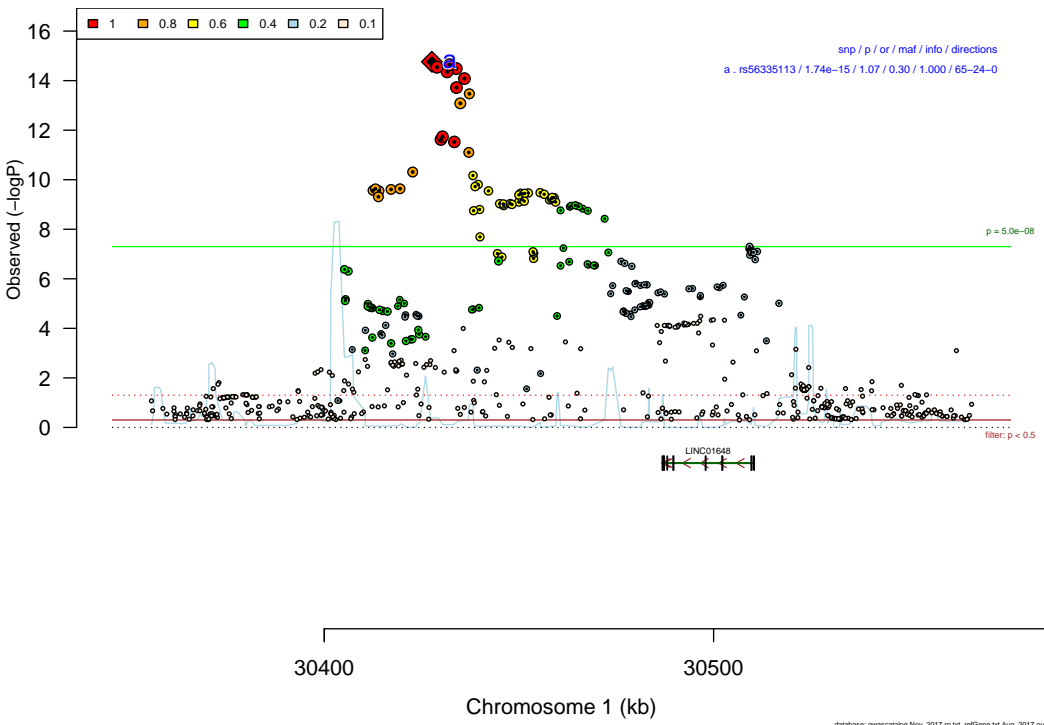

### SCZ\_cond\_rs56335113-chr1

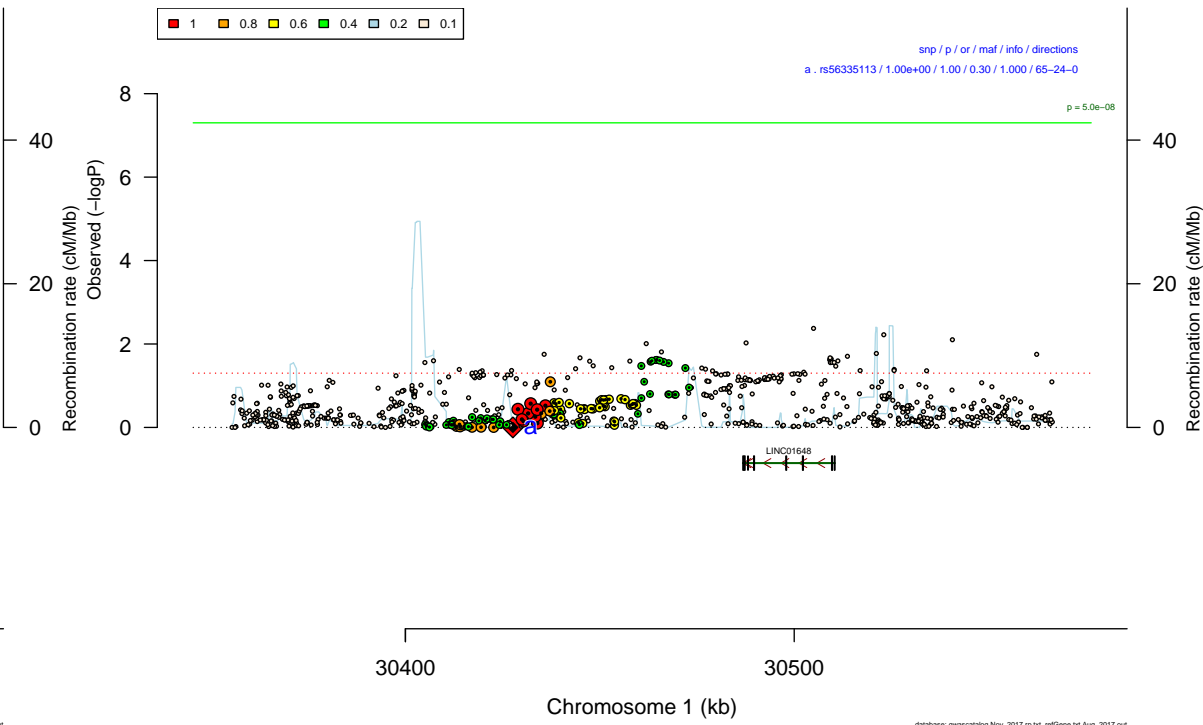



### SCZ\_uncond-rs1451488-chr2

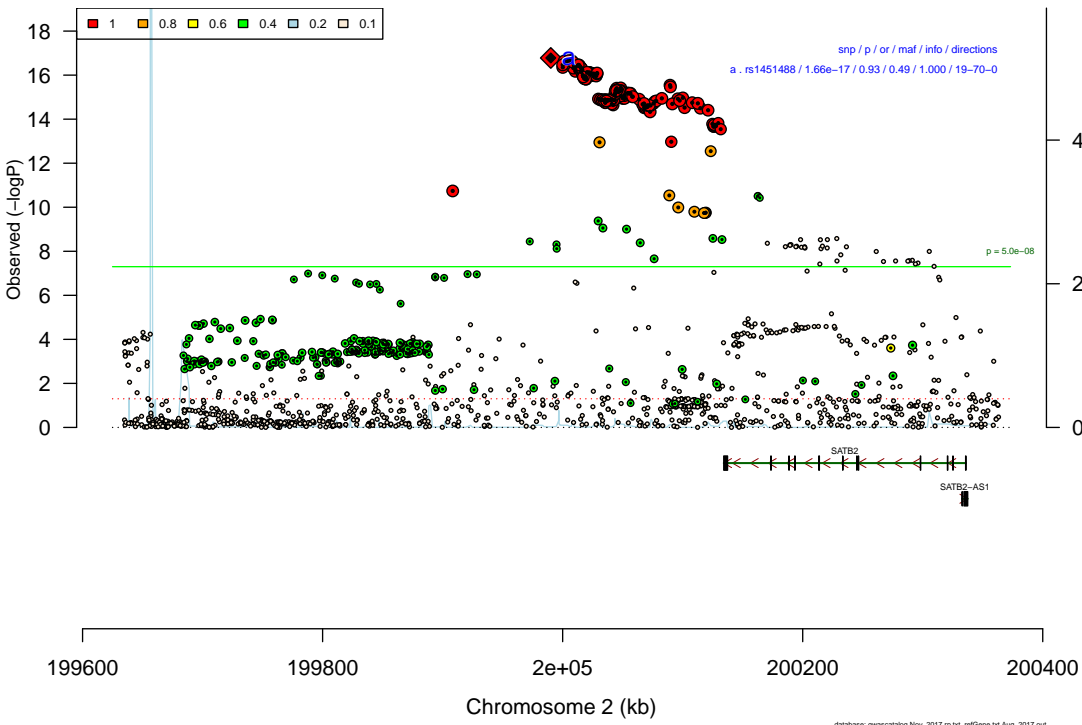

### SCZ\_cond\_rs1451488-chr2

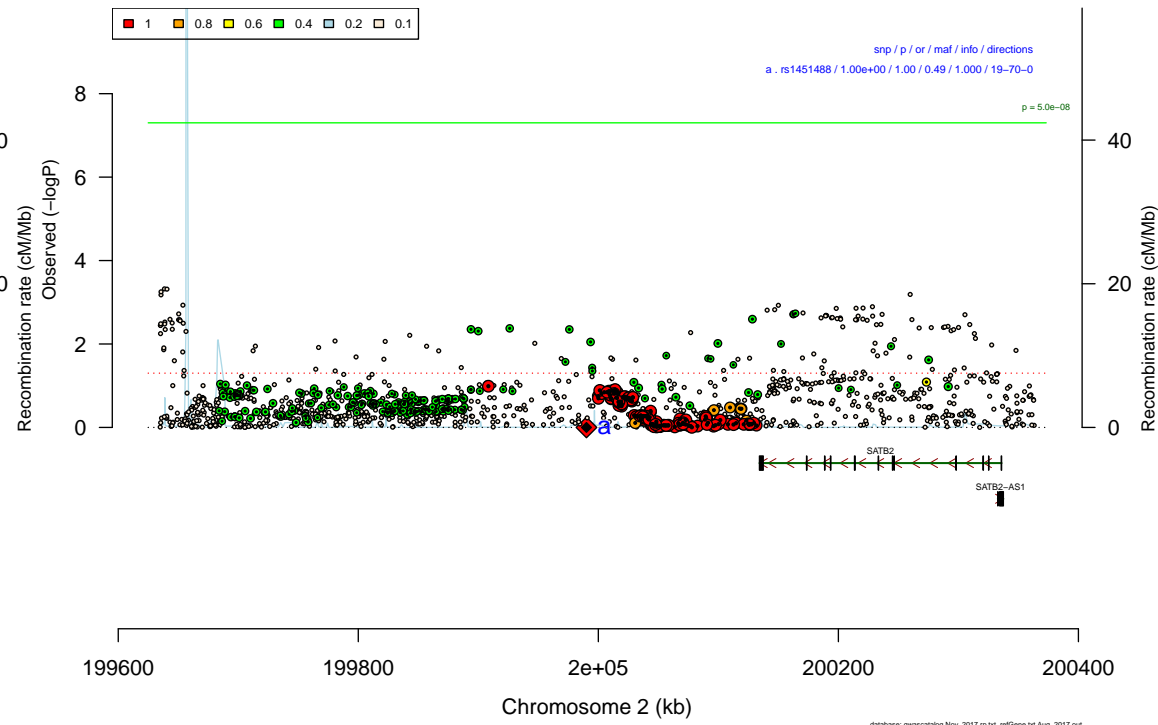

SCZ\_uncond-rs11587347-chr1

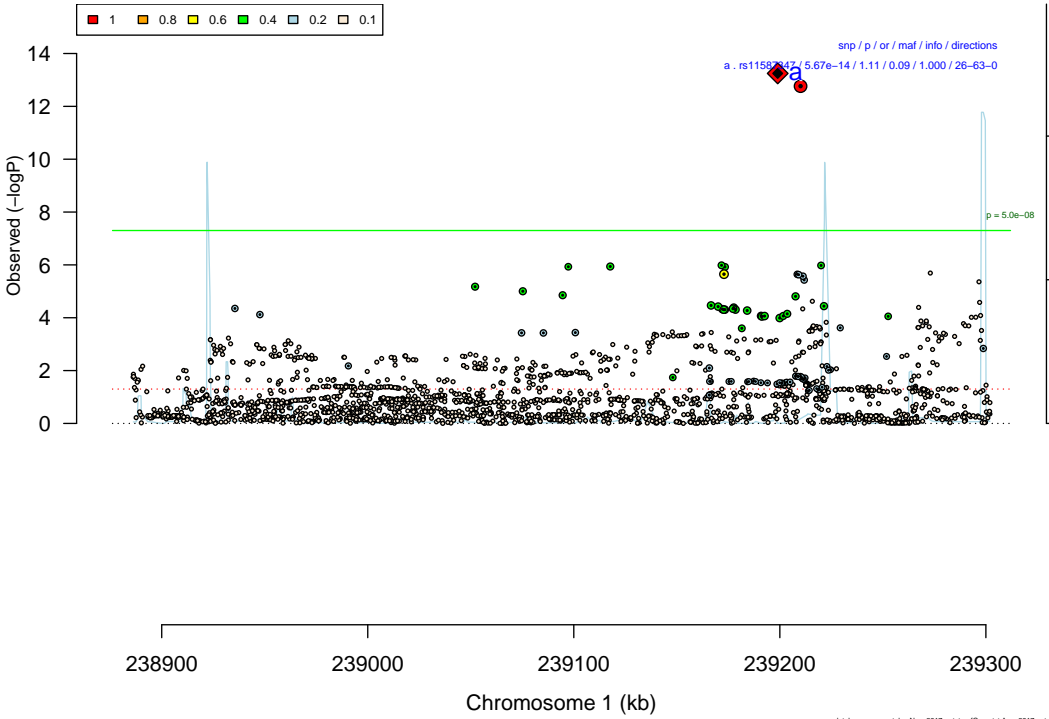

SCZ\_cond\_rs11587347-chr1

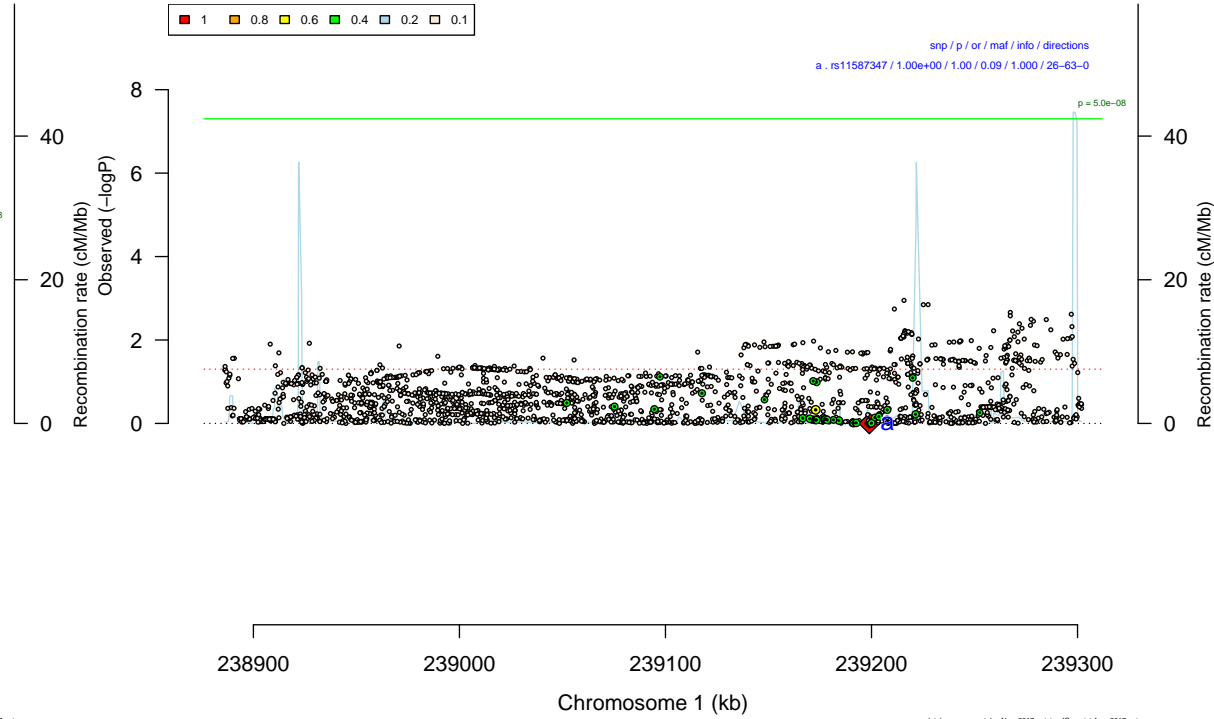

### SCZ\_uncond-rs61937595-chr12

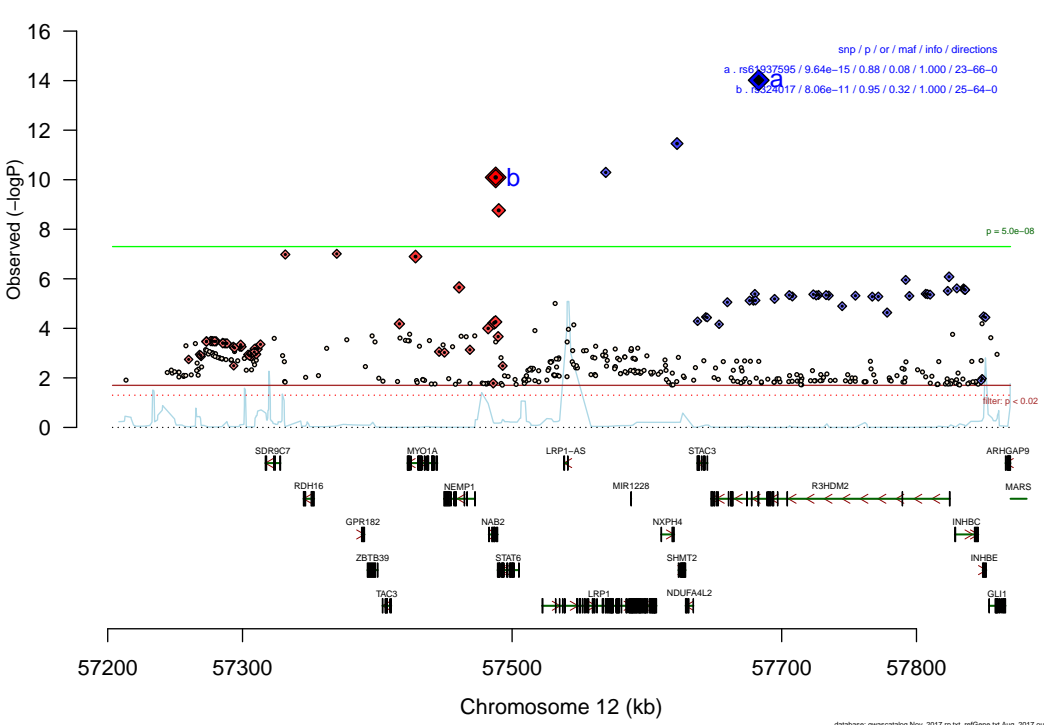

### SCZ\_cond\_rs61937595-chr12

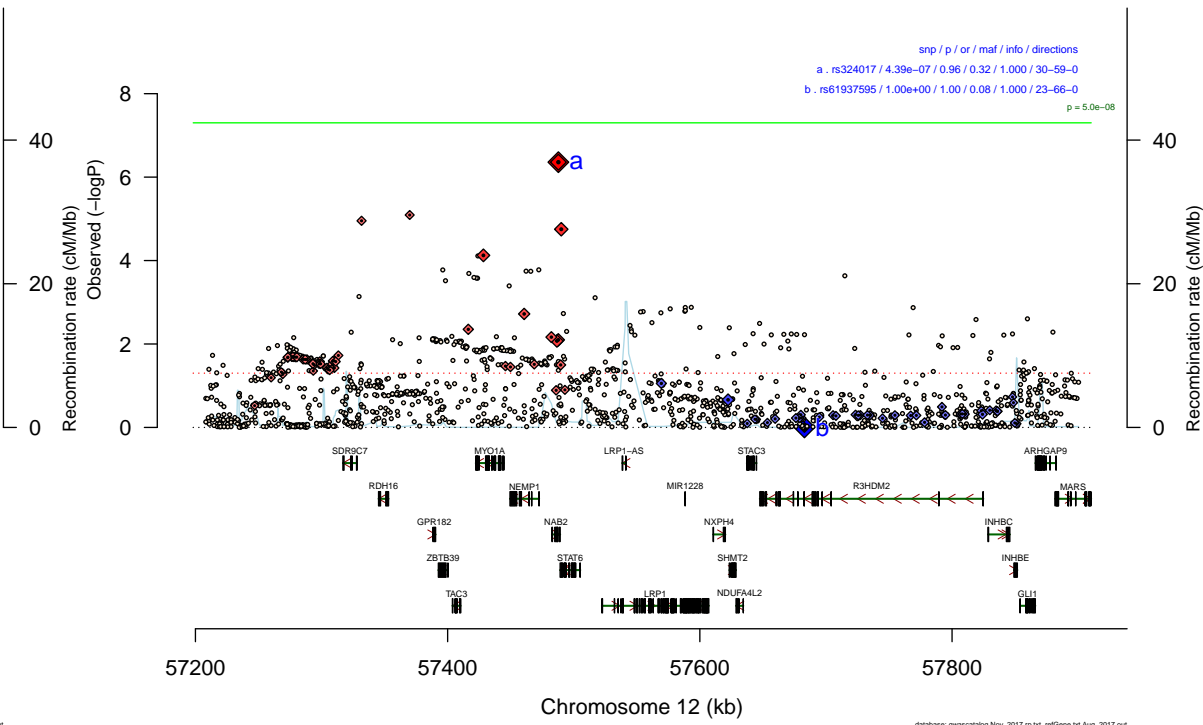

### SCZ\_cond\_rs61937595-rs324017-chr12

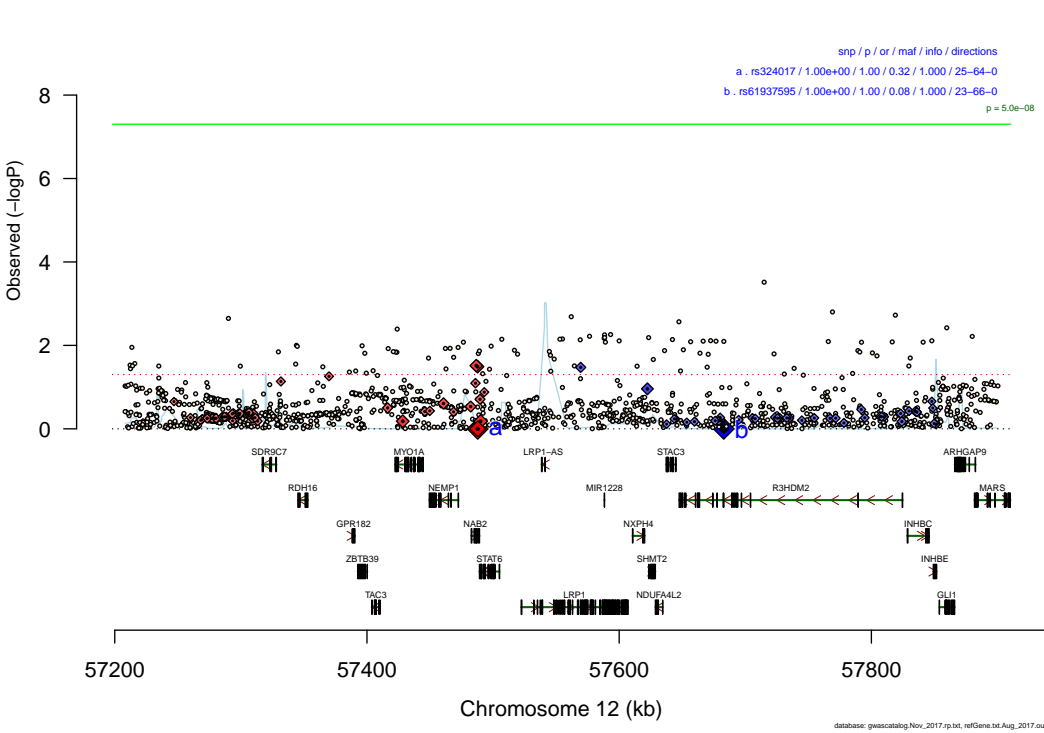

### SCZ\_uncond-rs11638554-chr15

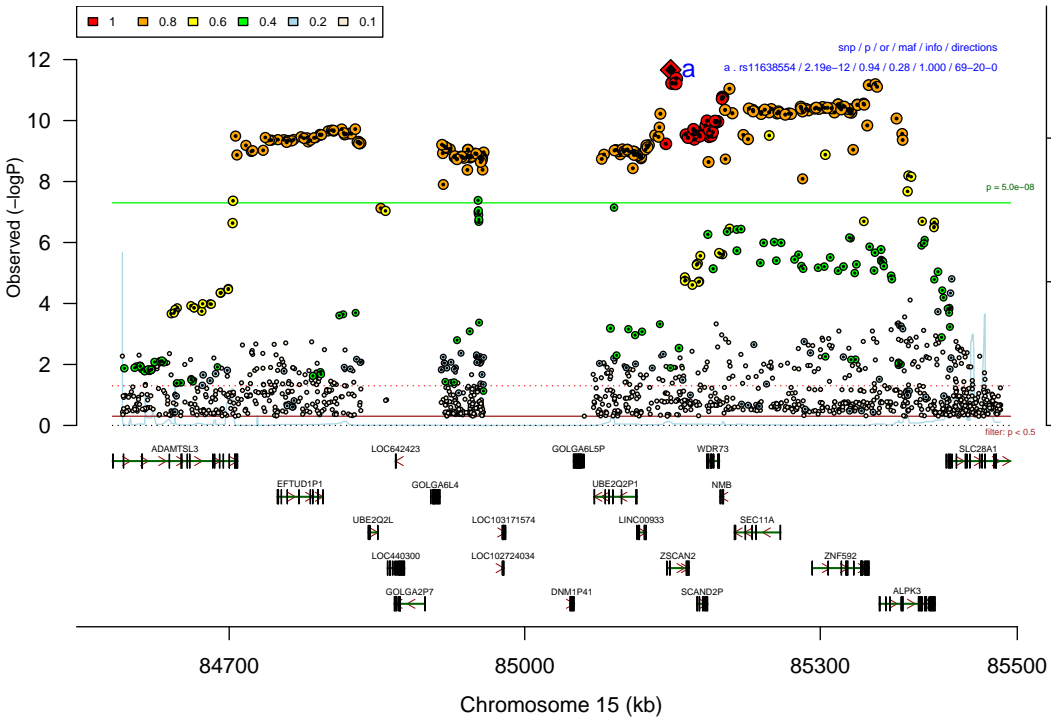

### SCZ\_cond\_rs11638554-chr15

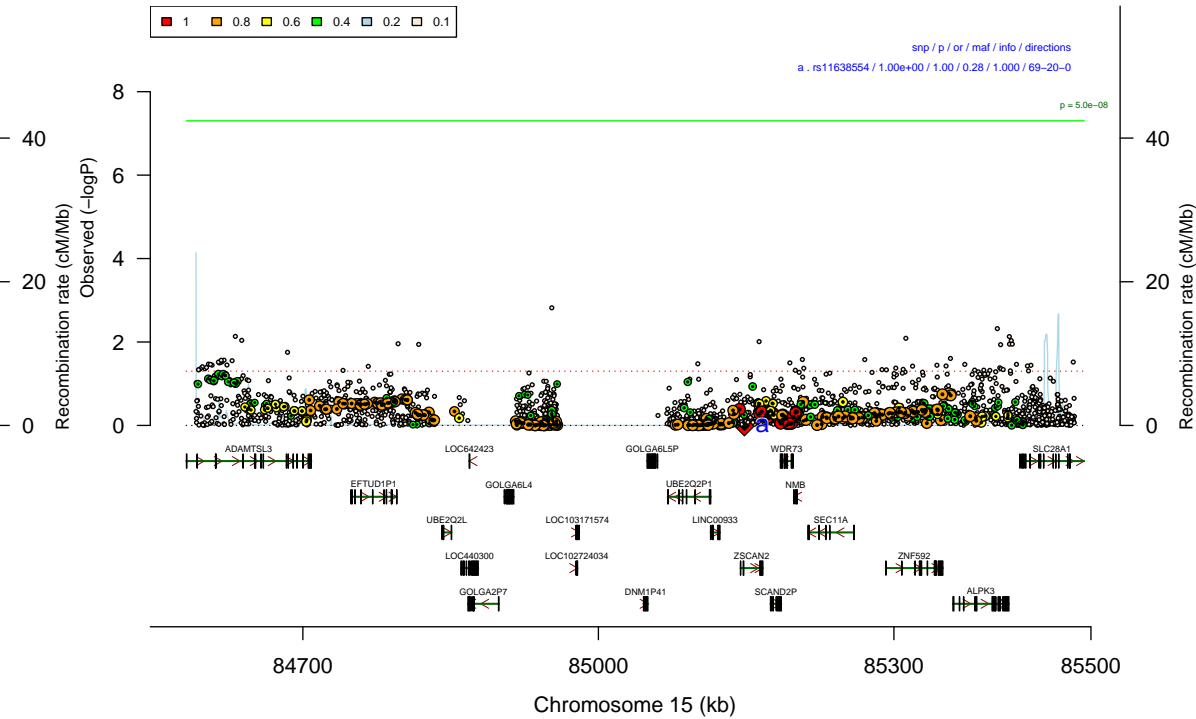

### SCZ\_uncond-rs10873538-chr14

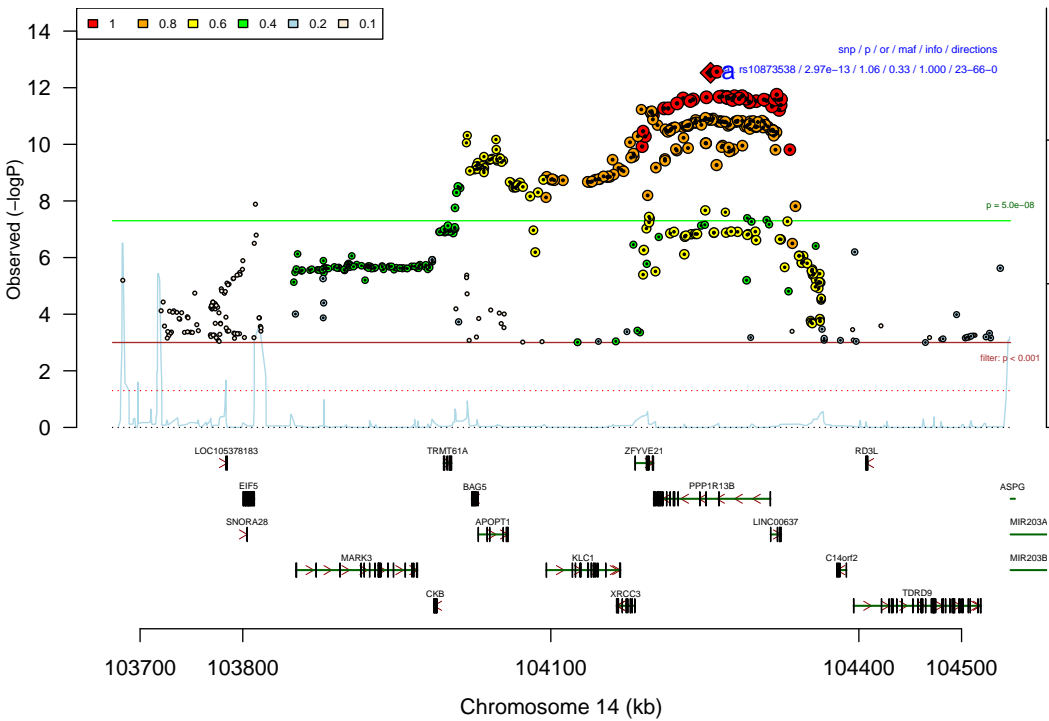

### SCZ\_cond\_rs10873538-chr14

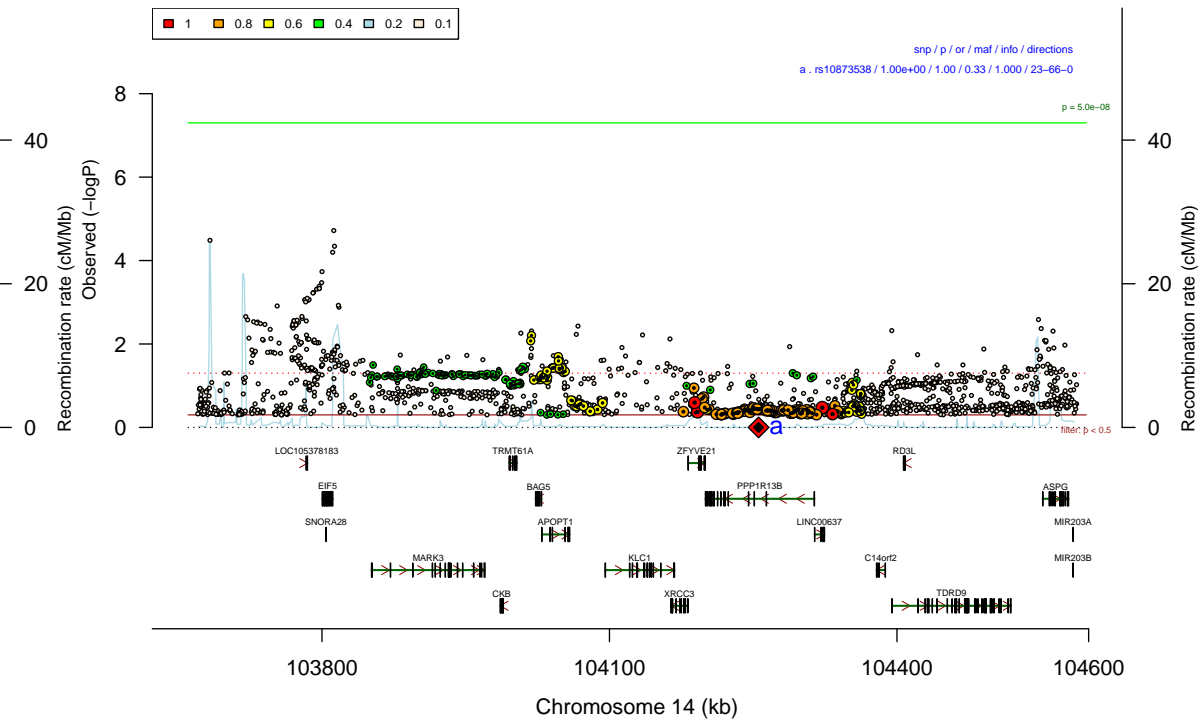

### SCZ\_uncond-rs732381-chr22

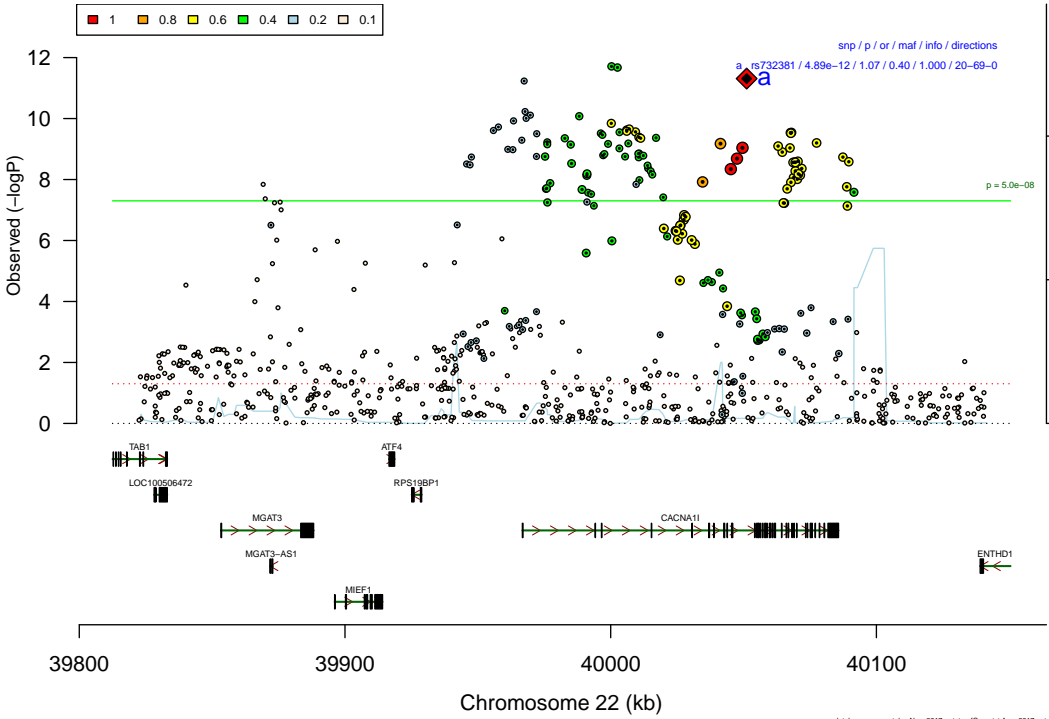

### SCZ\_cond\_rs732381-chr22

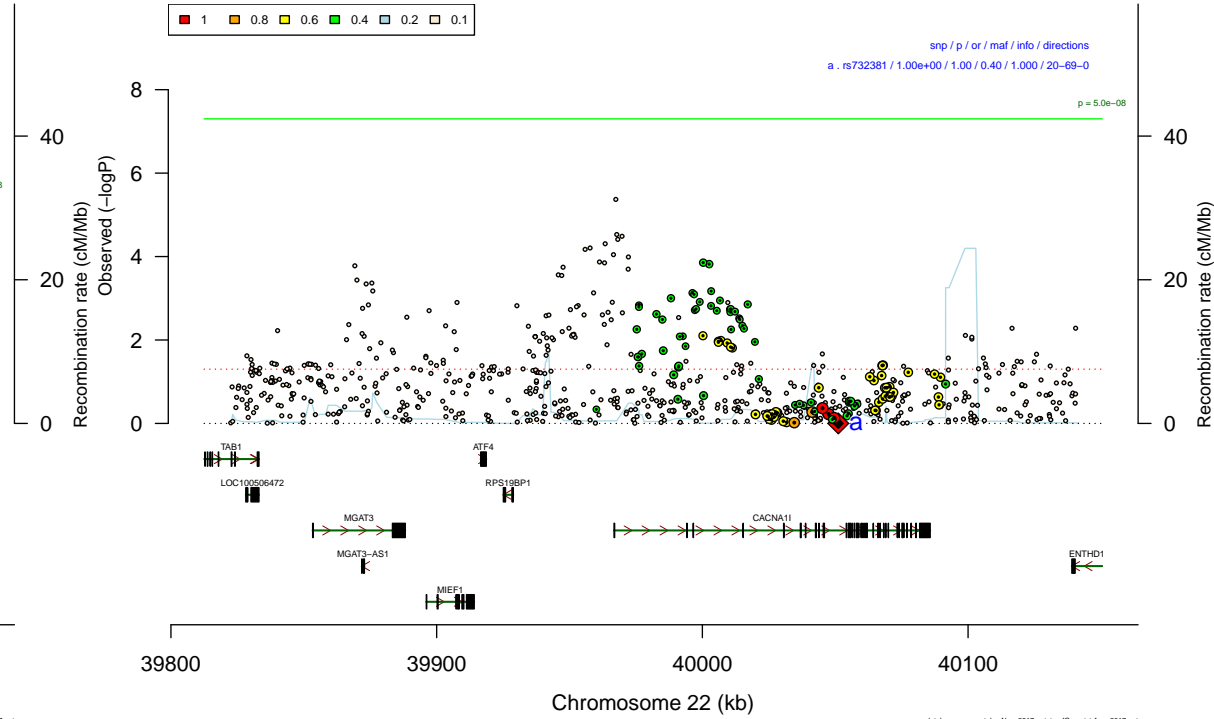

### SCZ\_uncond-rs38752-chr7

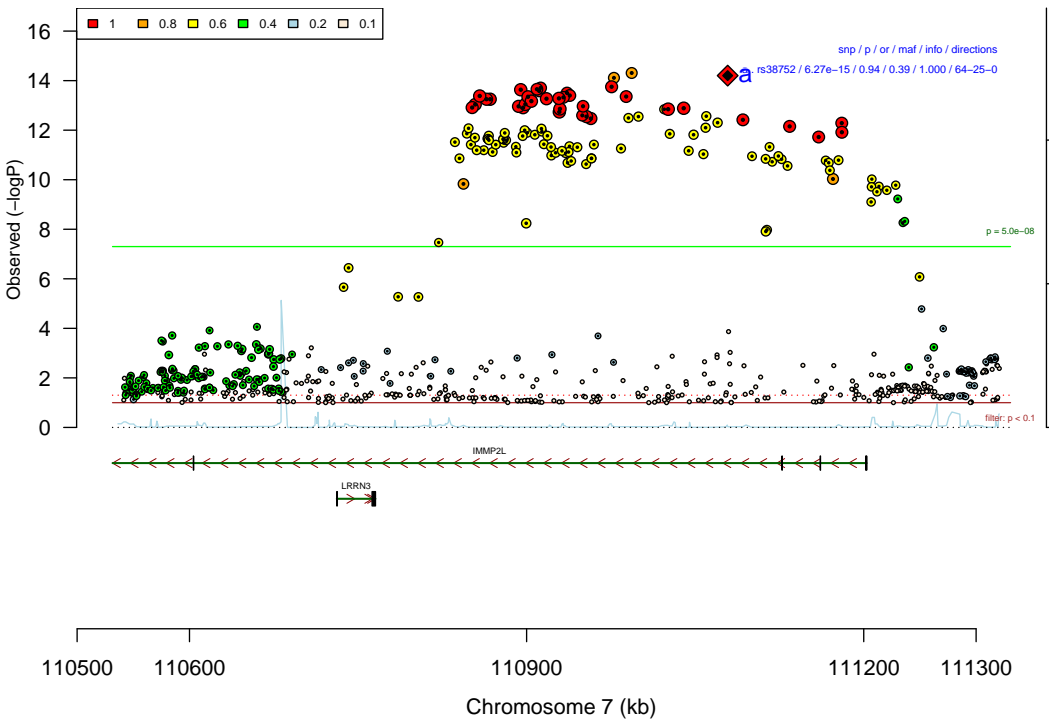

### SCZ\_cond\_rs38752-chr7

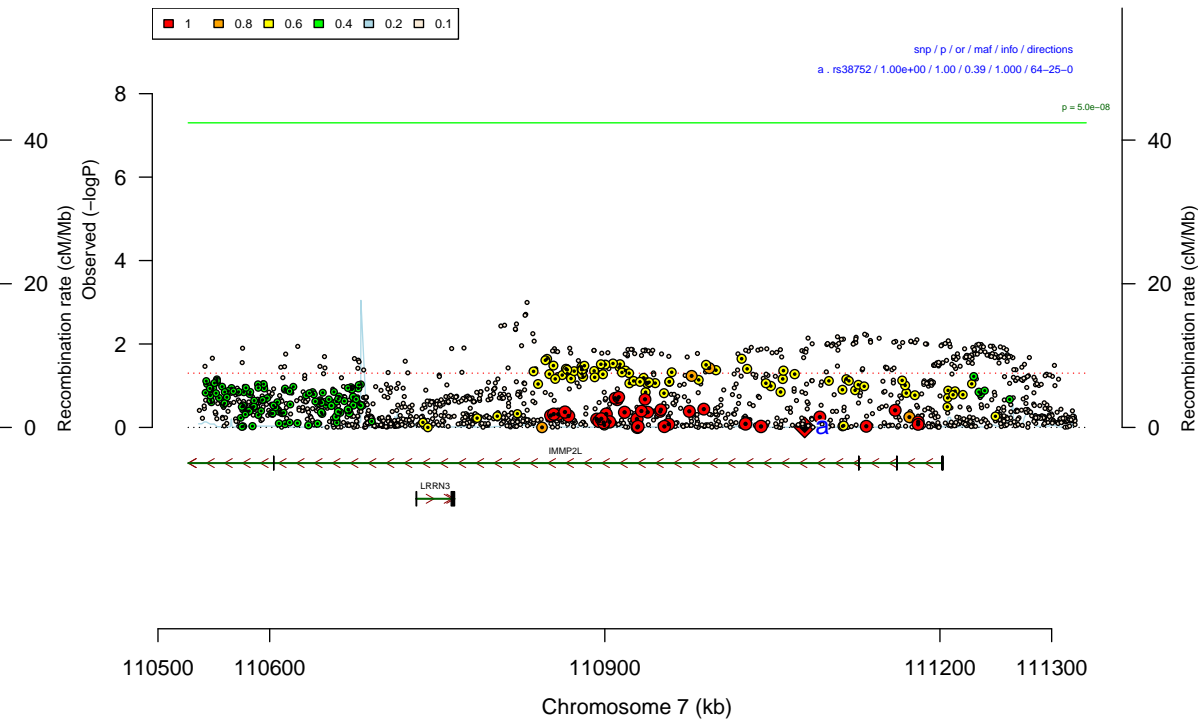

### SCZ\_uncond-rs7432375-chr3

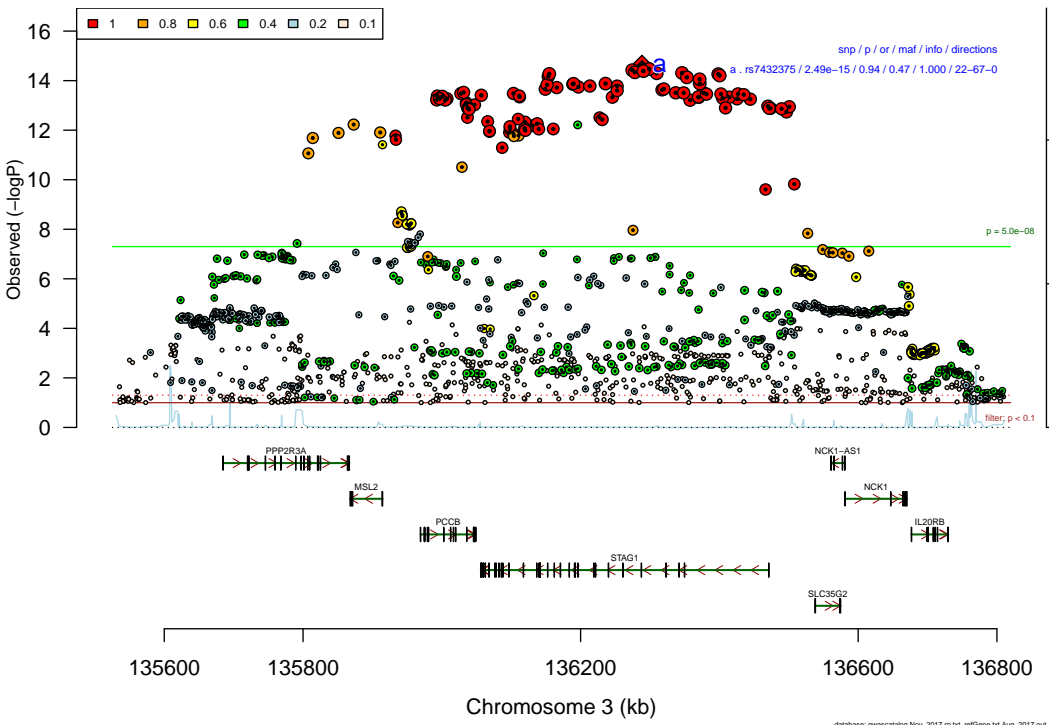

### SCZ\_cond\_rs7432375-chr3

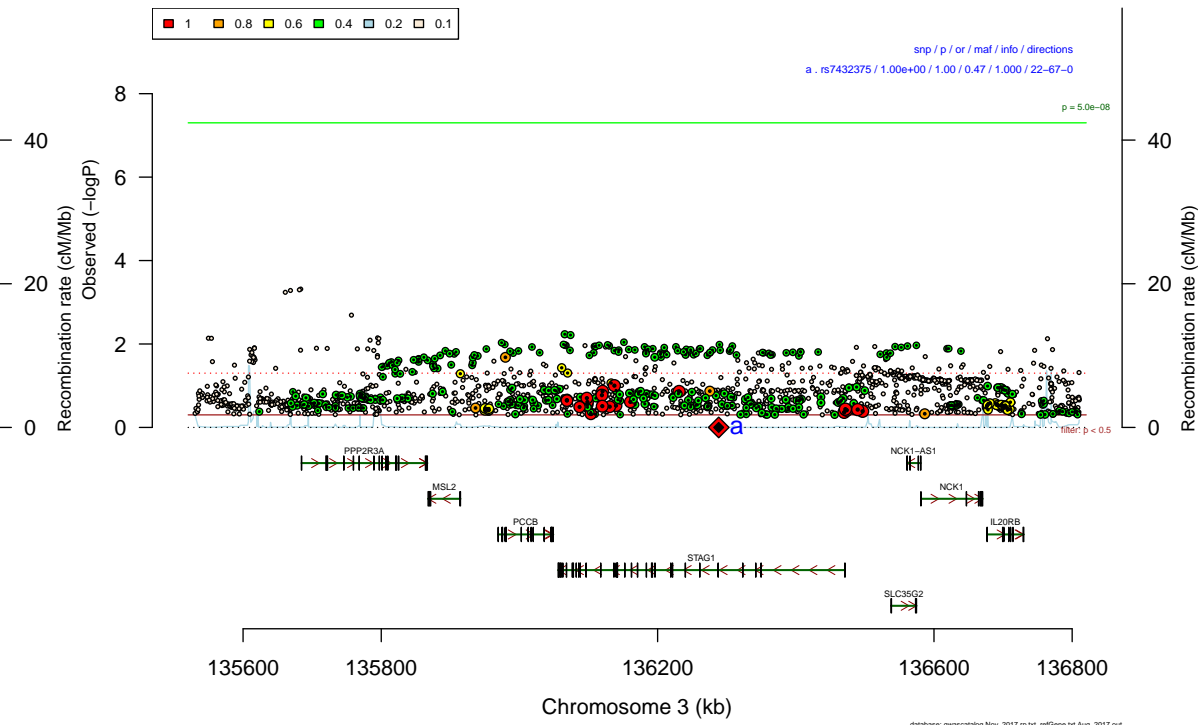



### SCZ\_uncond-rs10035564-chr5

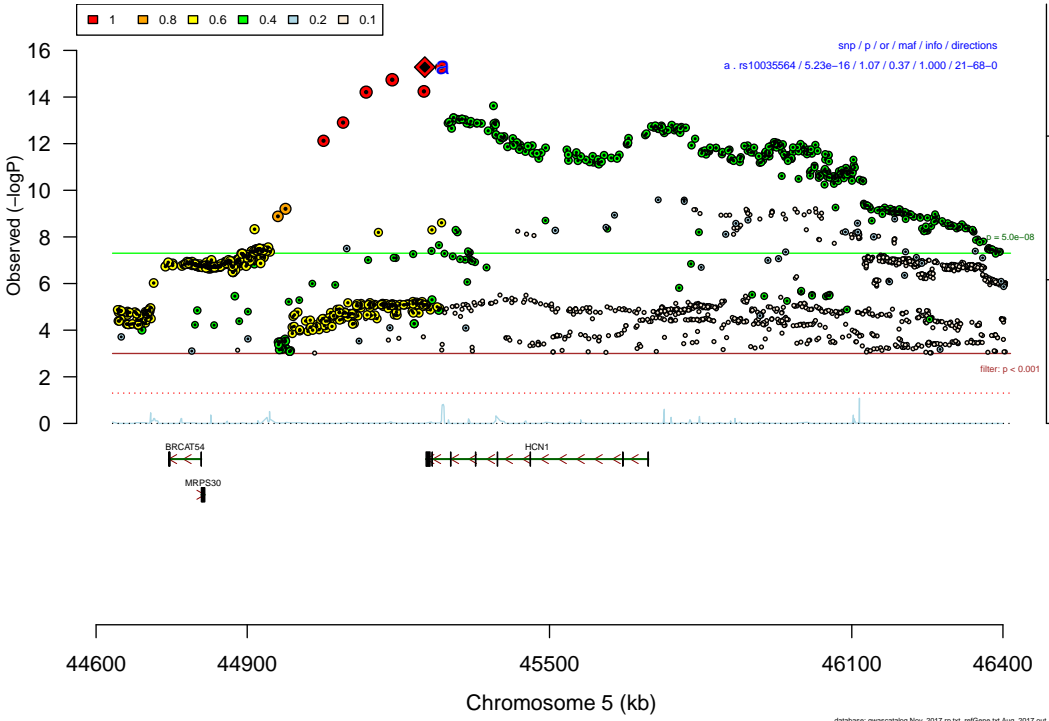

### SCZ\_cond\_rs10035564-chr5

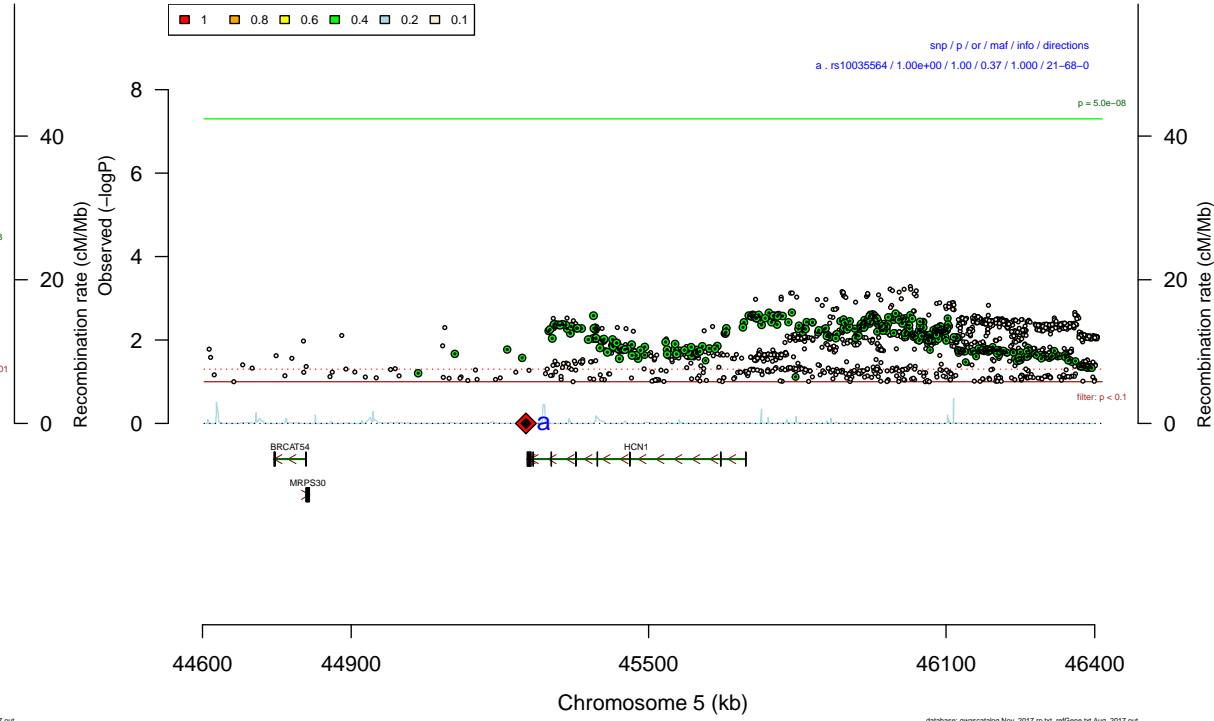

### SCZ\_uncond-rs2304205-chr19

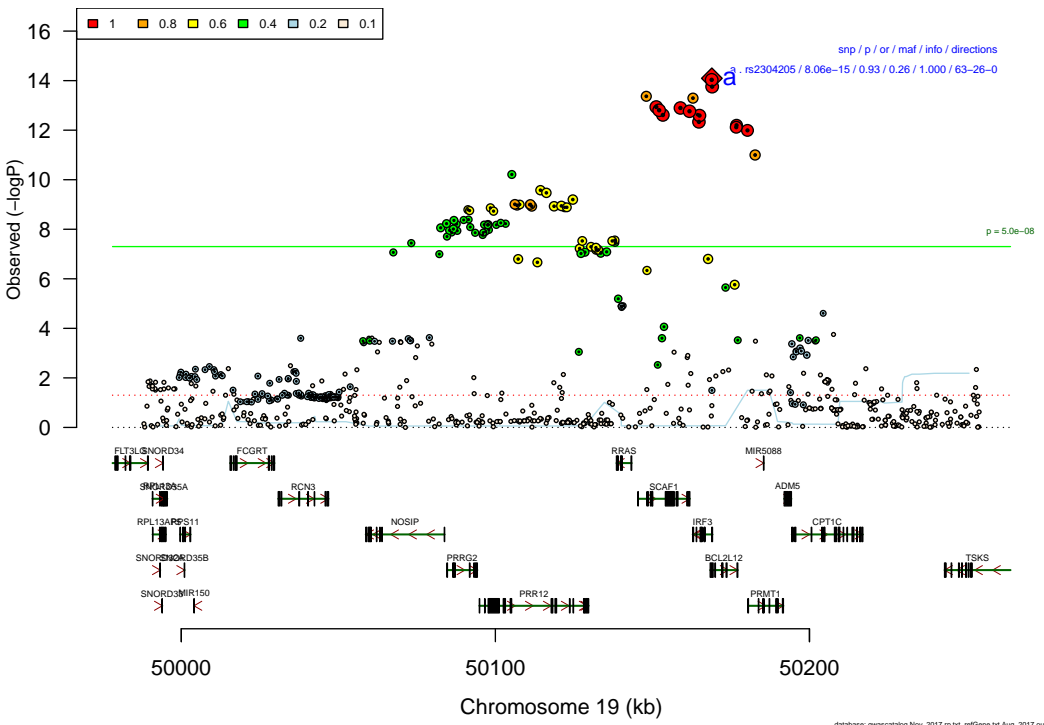

### SCZ\_cond\_rs2304205-chr19

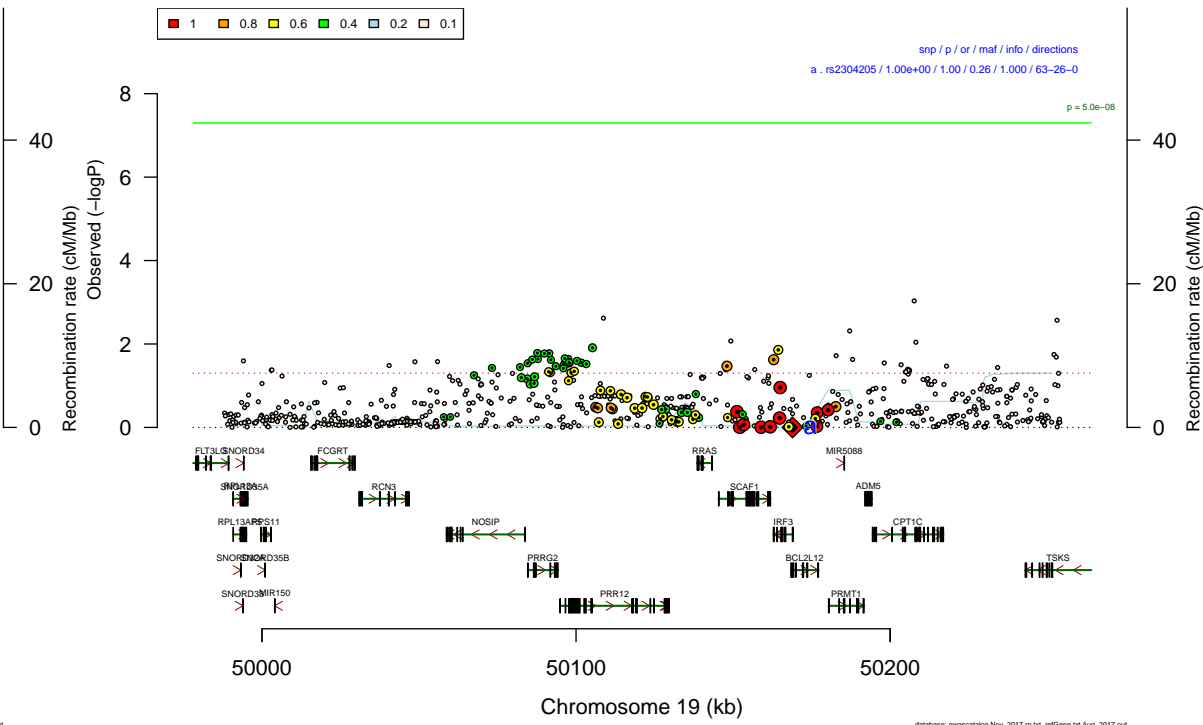

### SCZ\_uncond-rs11693094-chr2

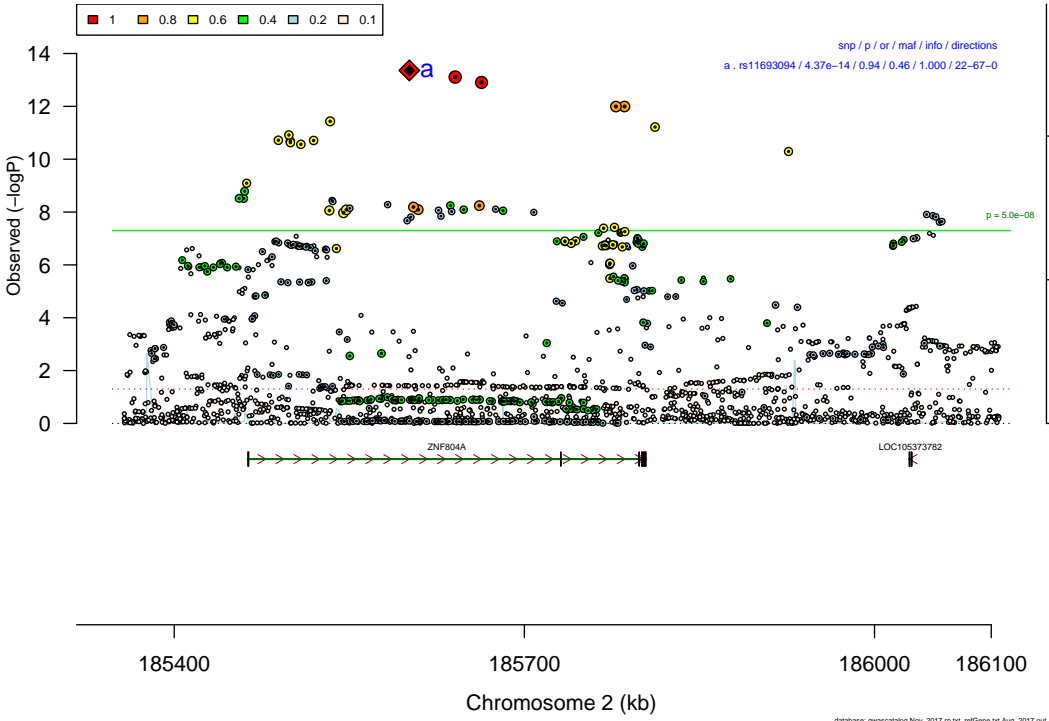

### SCZ\_cond\_rs11693094-chr2

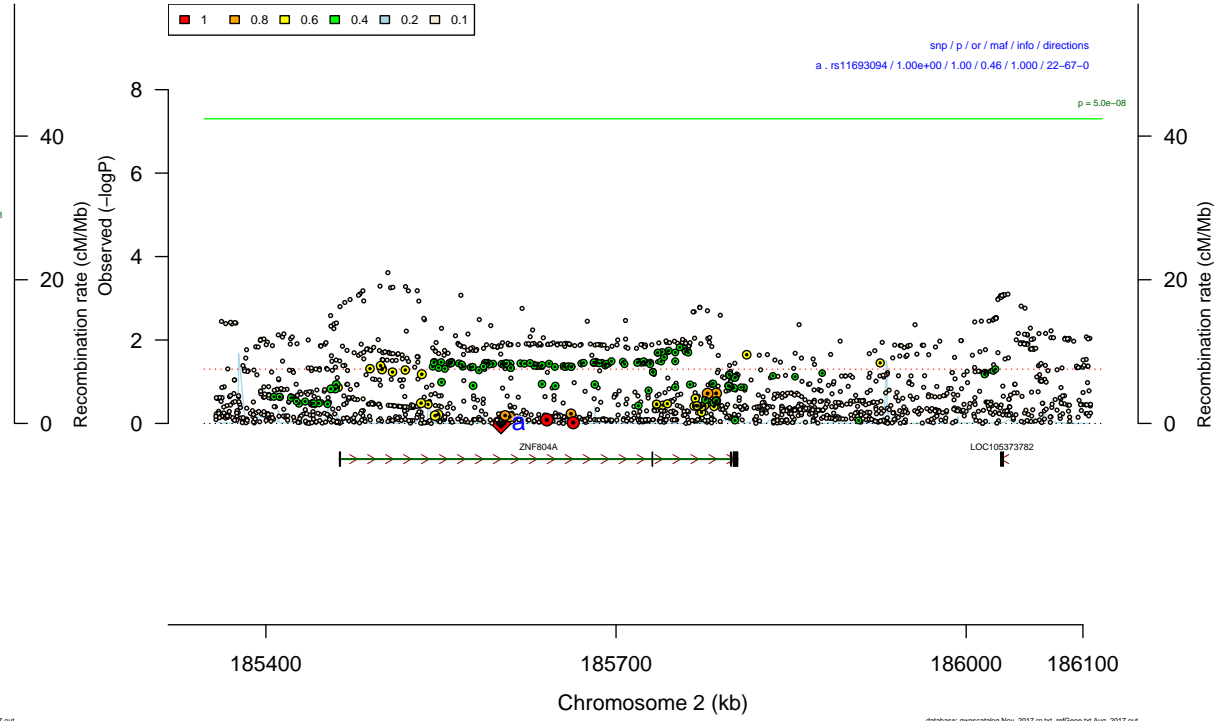

### SCZ\_uncond-rs4936215-chr11

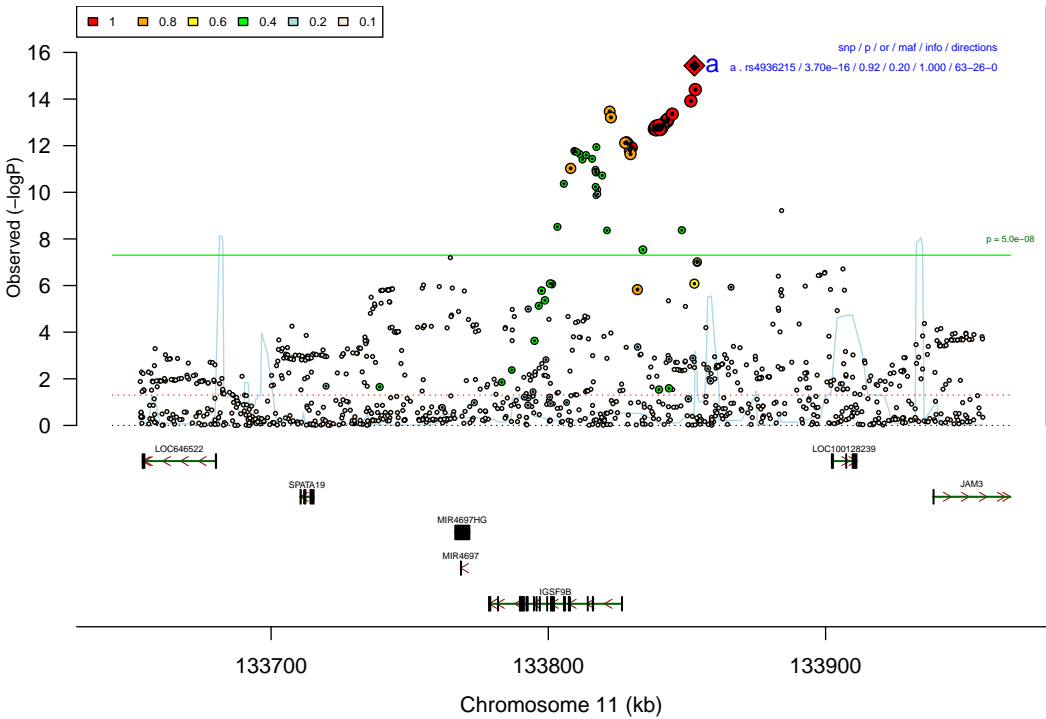

### SCZ\_cond\_rs4936215-chr11

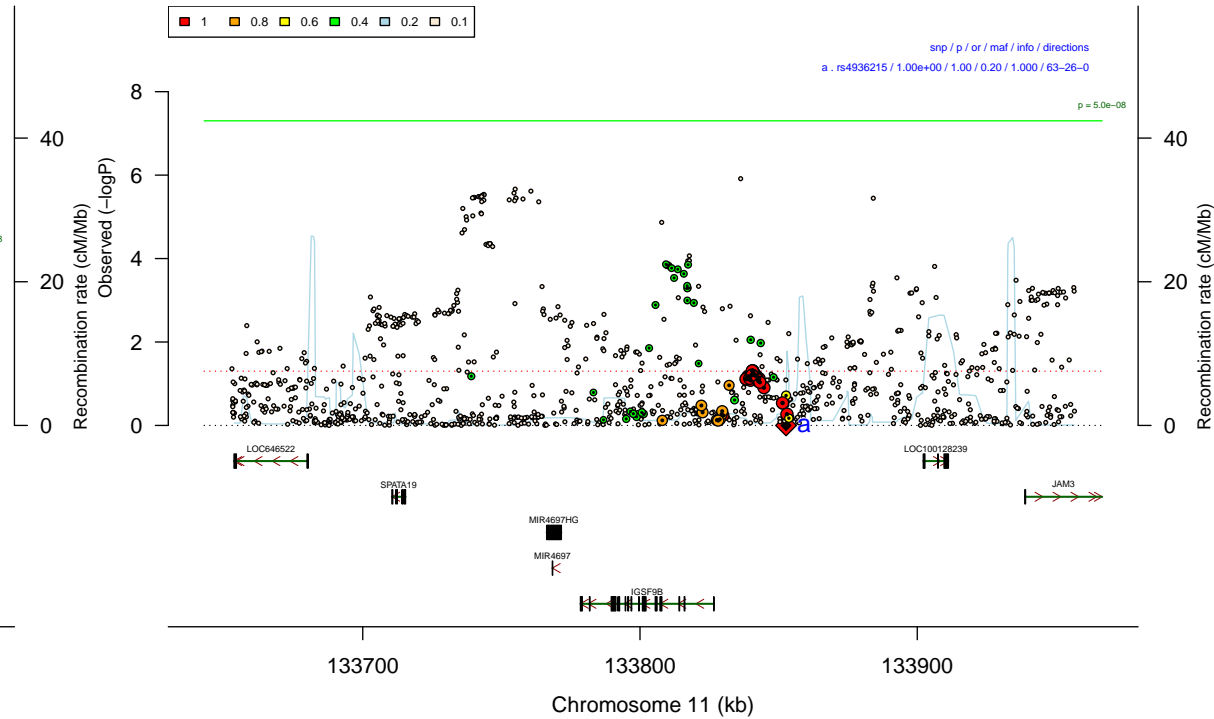

### SCZ\_uncond-rs12991836-chr2

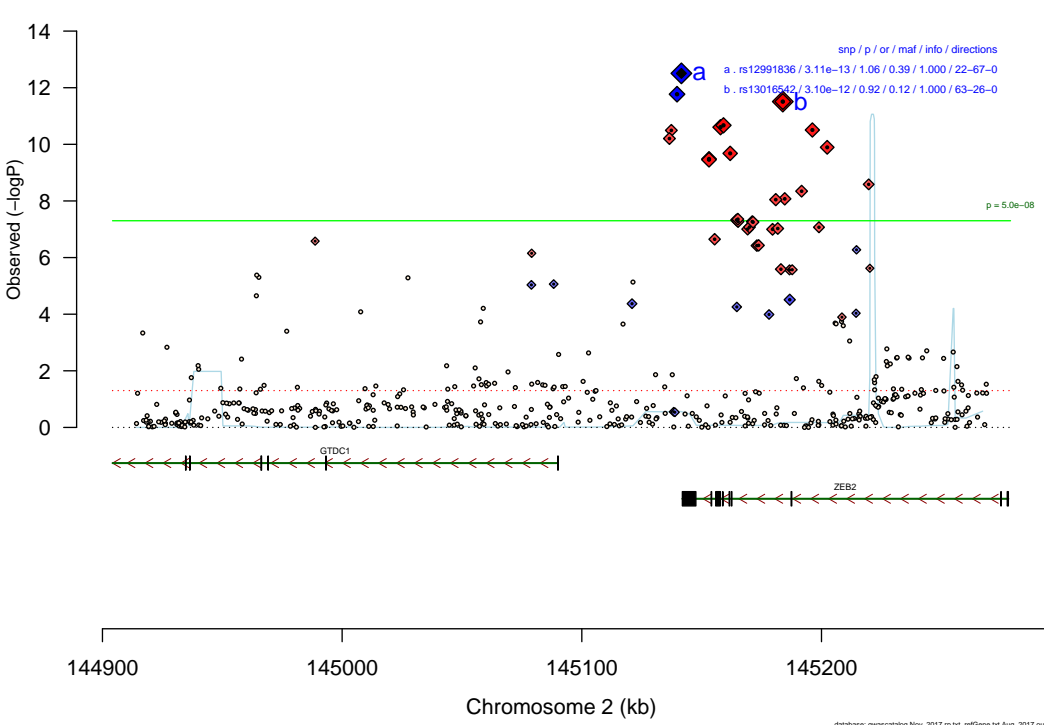

### SCZ\_cond\_rs12991836-chr2

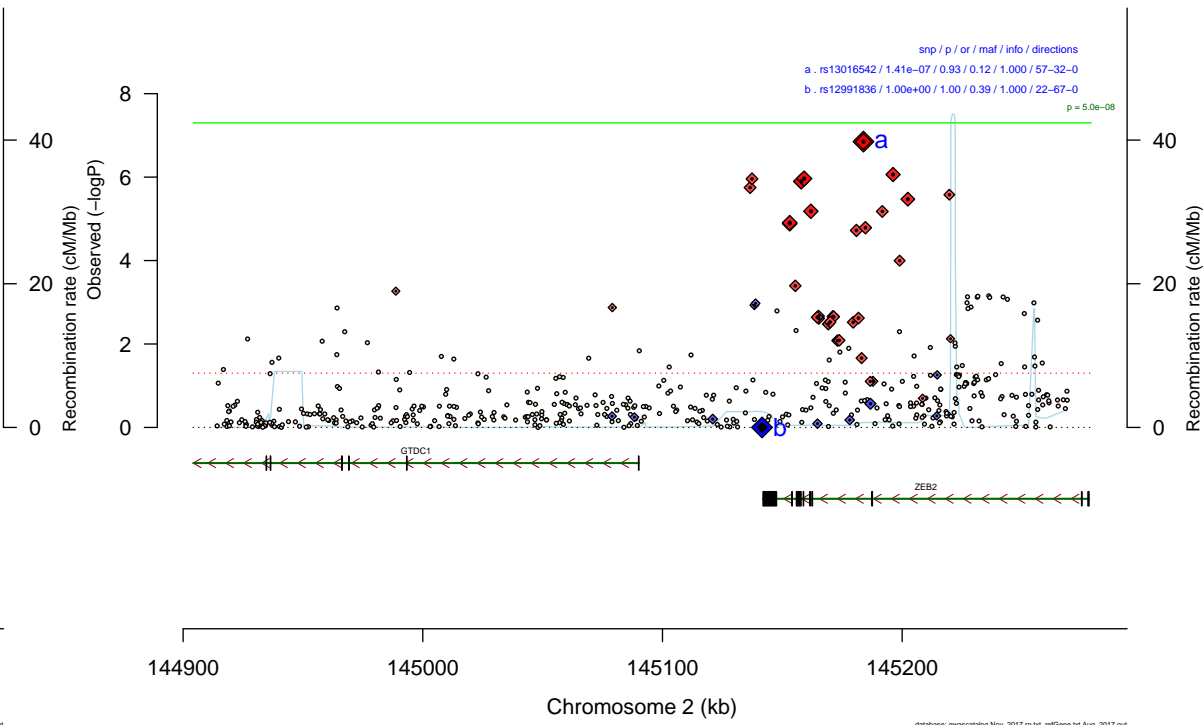

### SCZ\_cond\_rs12991836-rs13016542-chr2

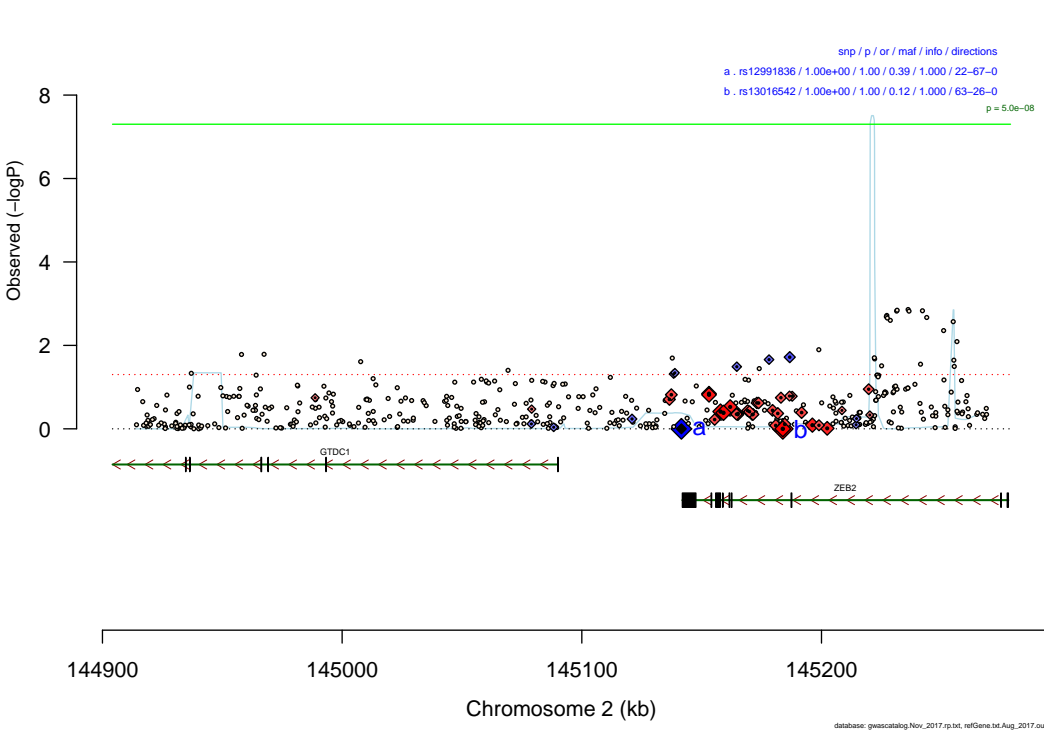

### SCZ\_uncond-rs1939514-chr11

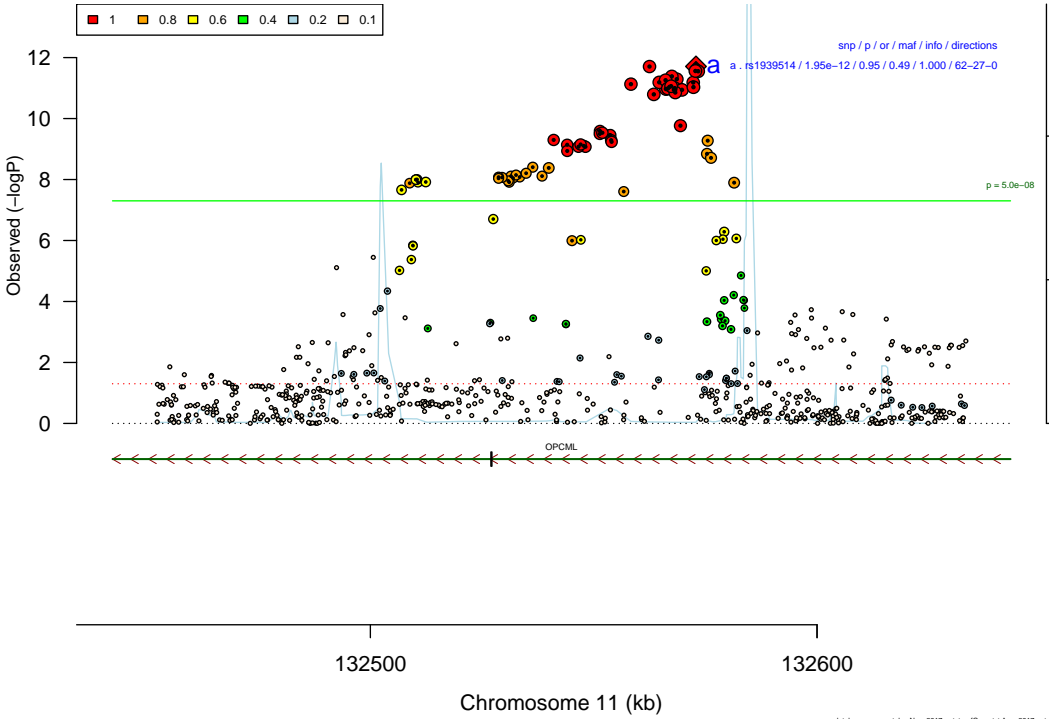

### SCZ\_cond\_rs1939514-chr11

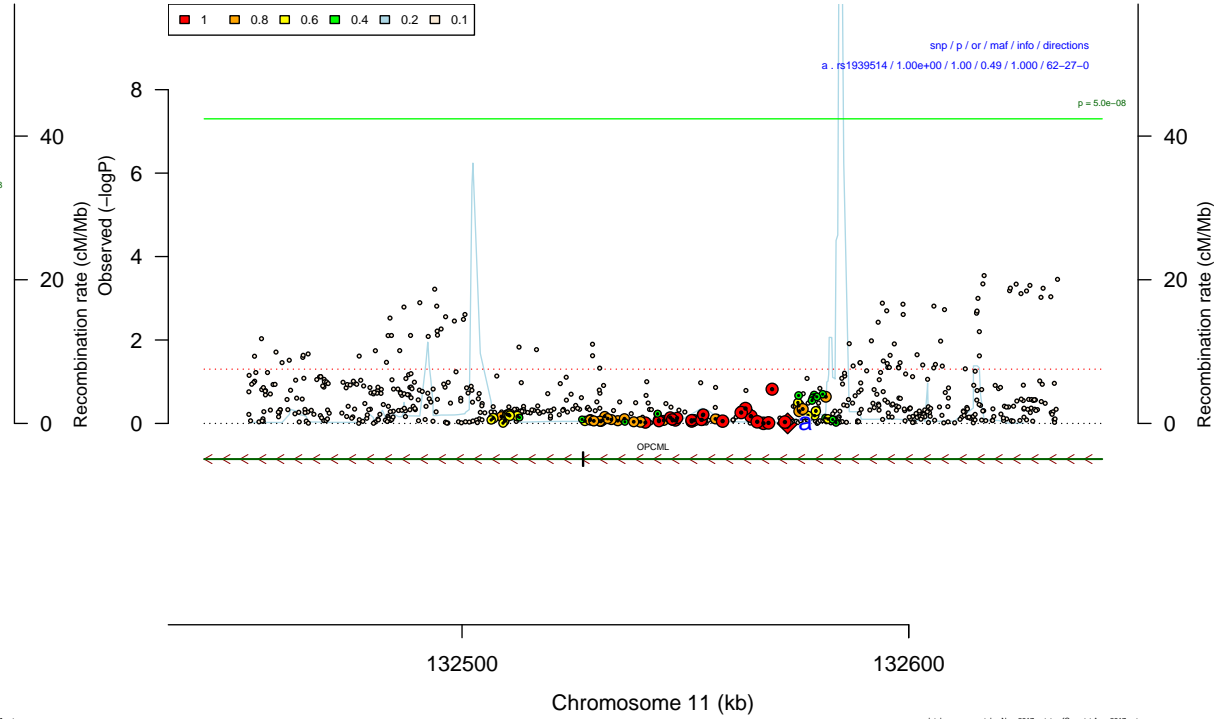

### SCZ\_uncond-rs16851048-chr1

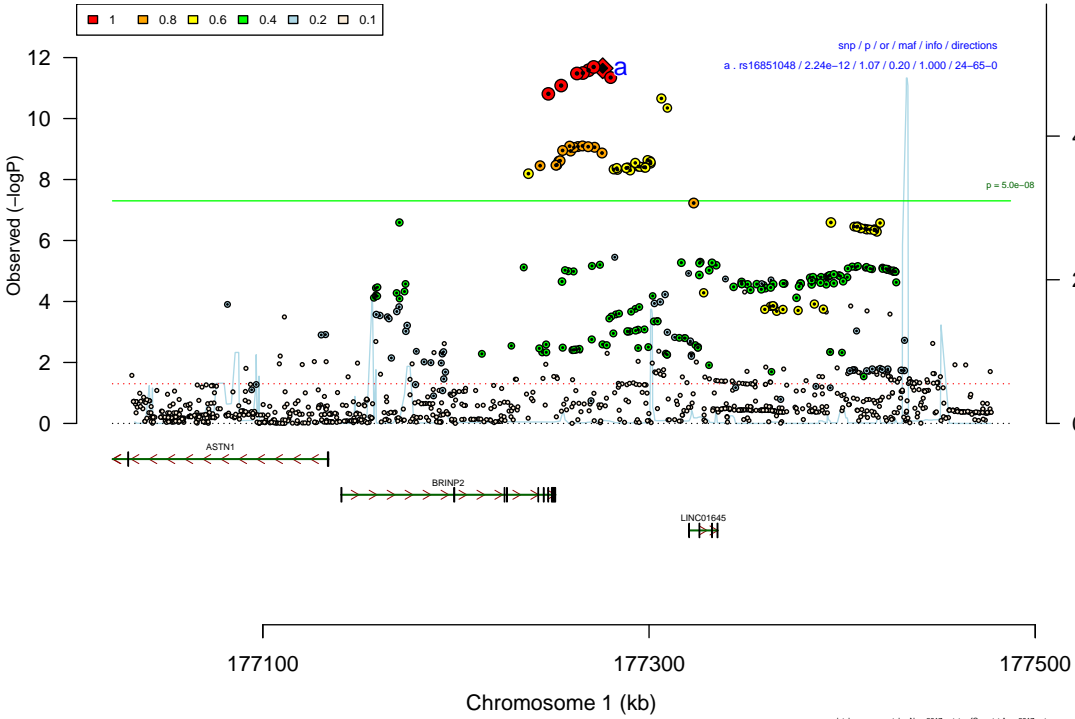

### SCZ\_cond\_rs16851048-chr1

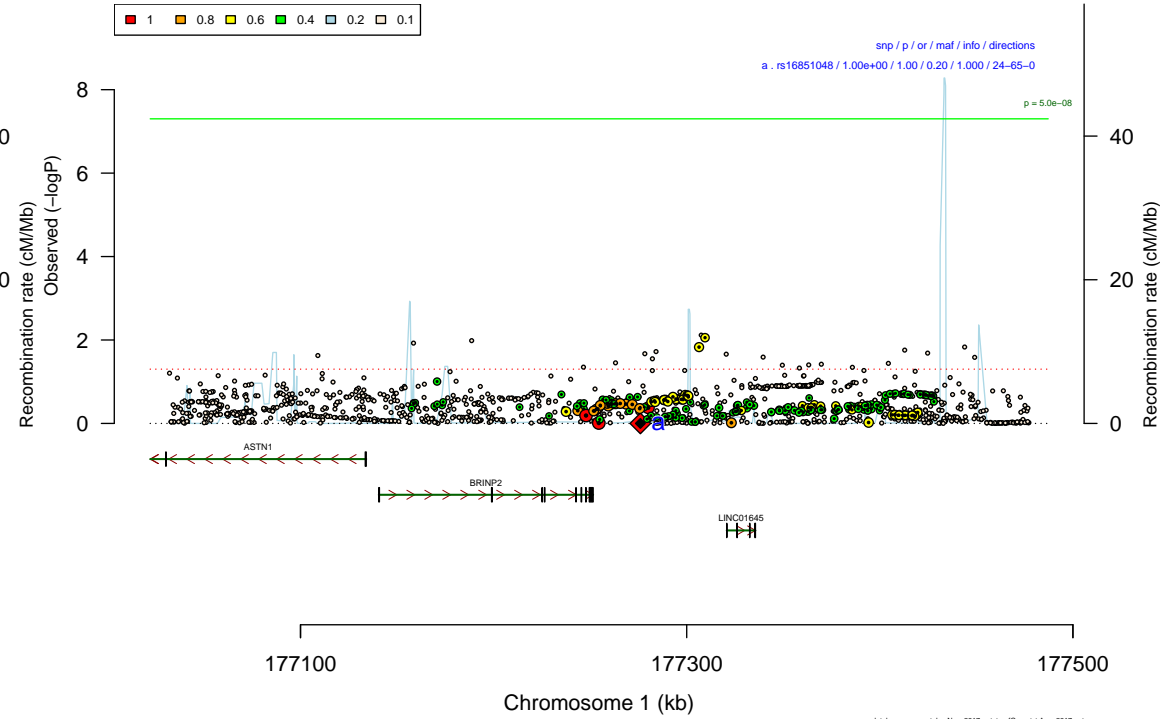

### SCZ\_uncond-rs17731-chr10

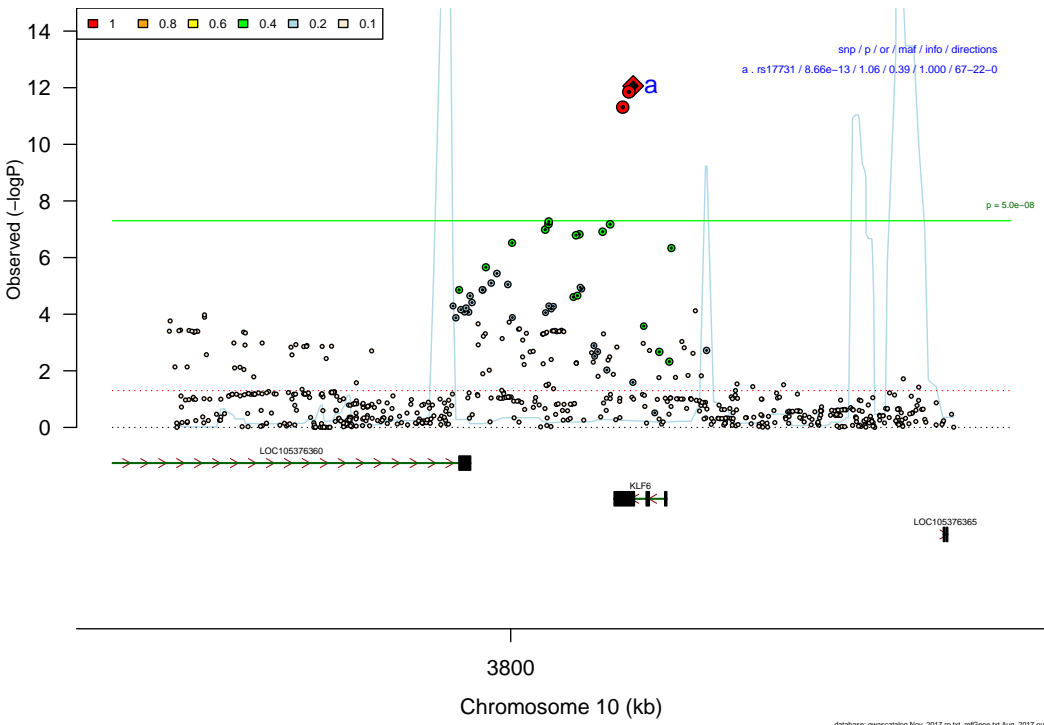

### SCZ\_cond\_rs17731-chr10

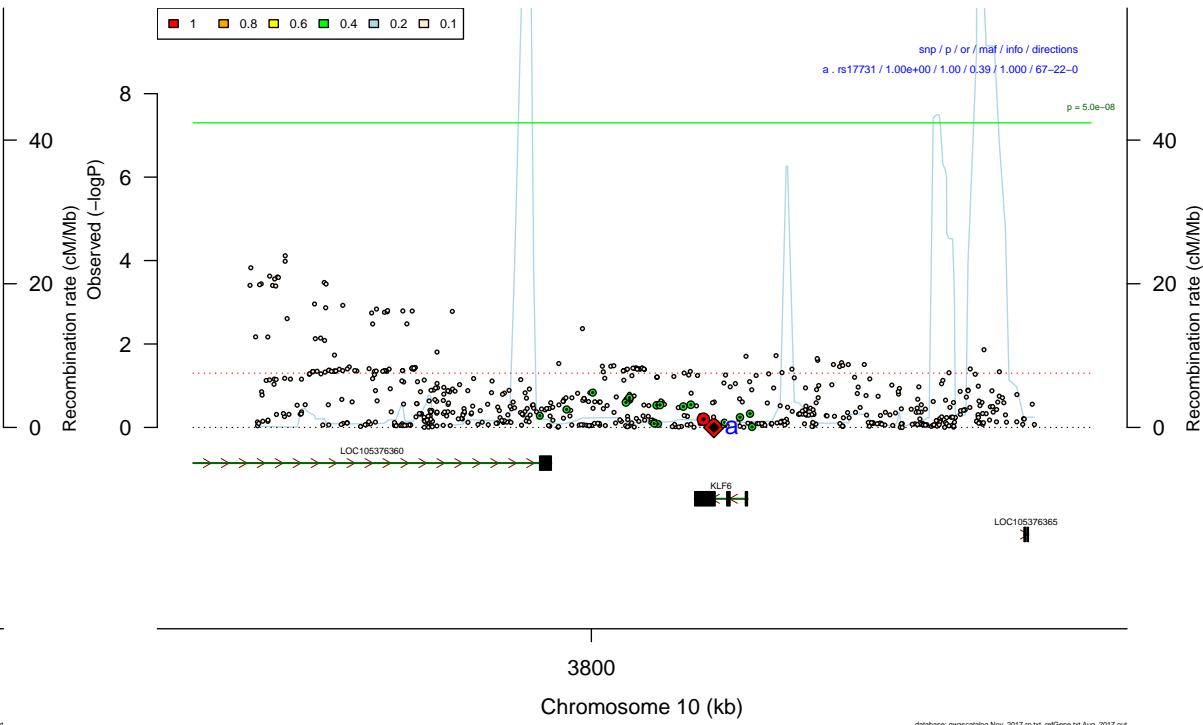





### SCZ\_uncond-rs3808581-chr8

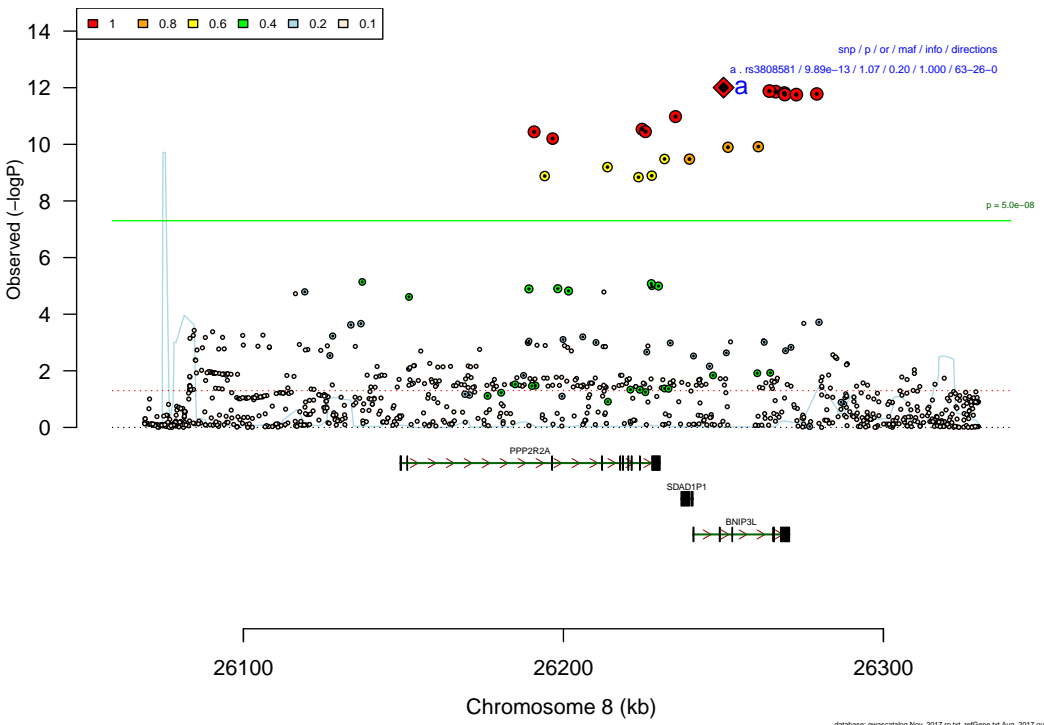

### SCZ\_cond\_rs3808581-chr8

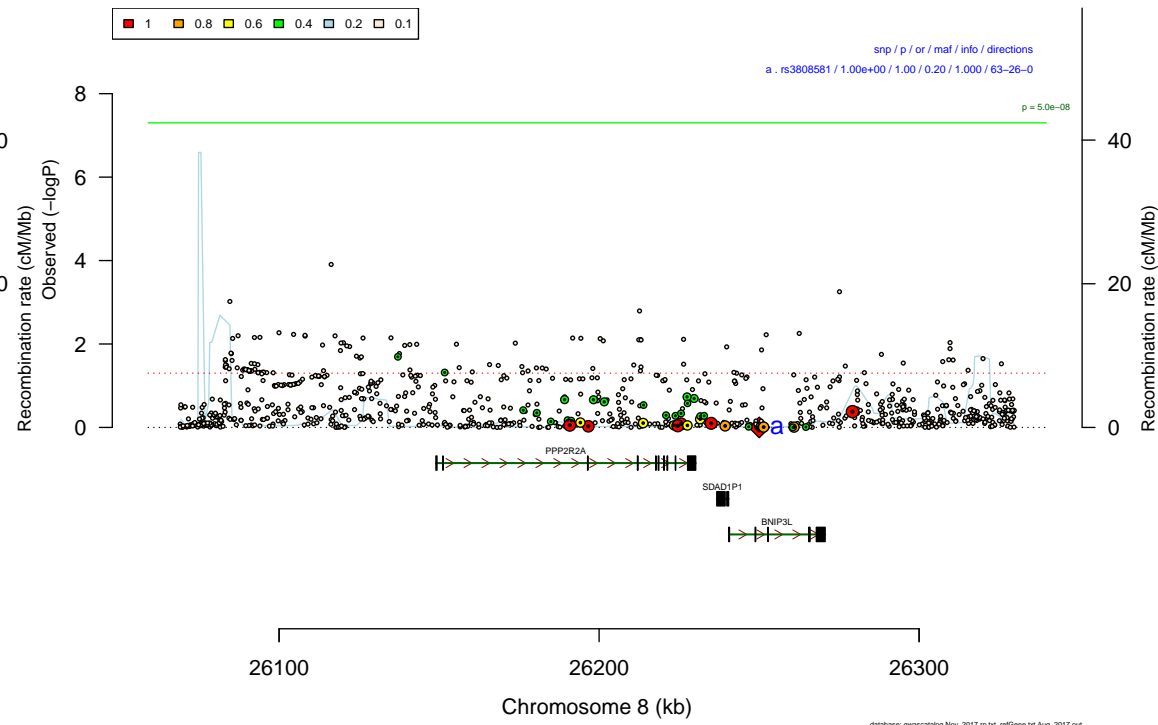

### SCZ\_uncond-rs9304548-chr18

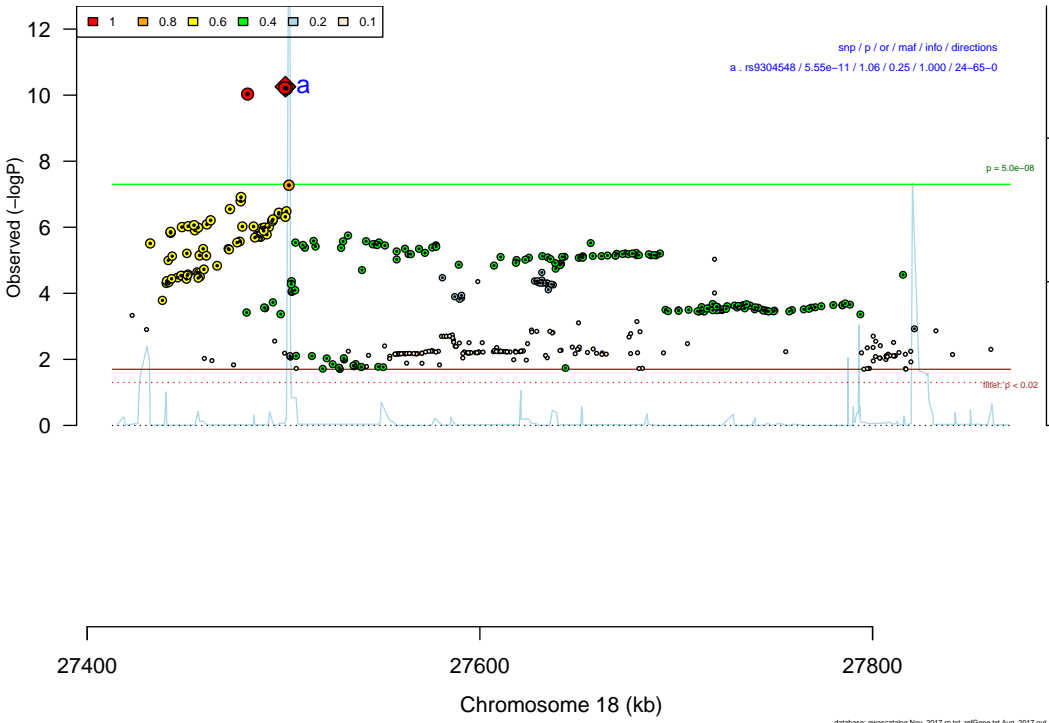

### SCZ\_cond\_rs9304548-chr18

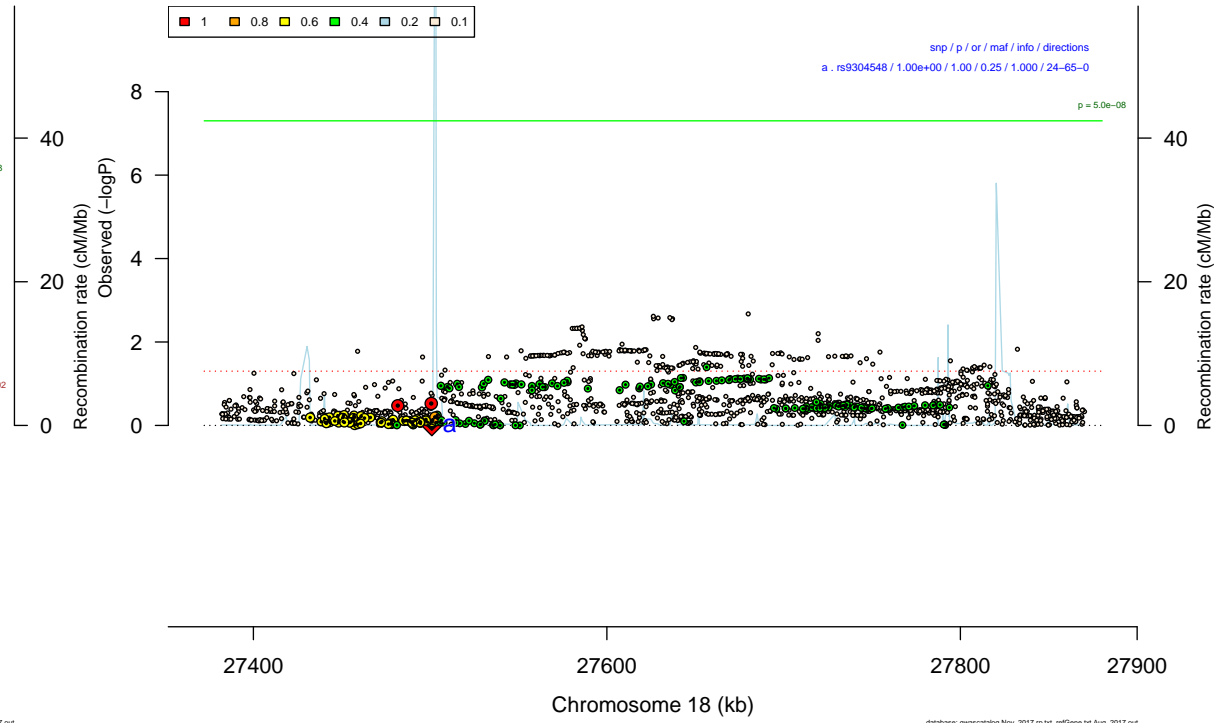

### SCZ\_uncond-rs35351411-chr15

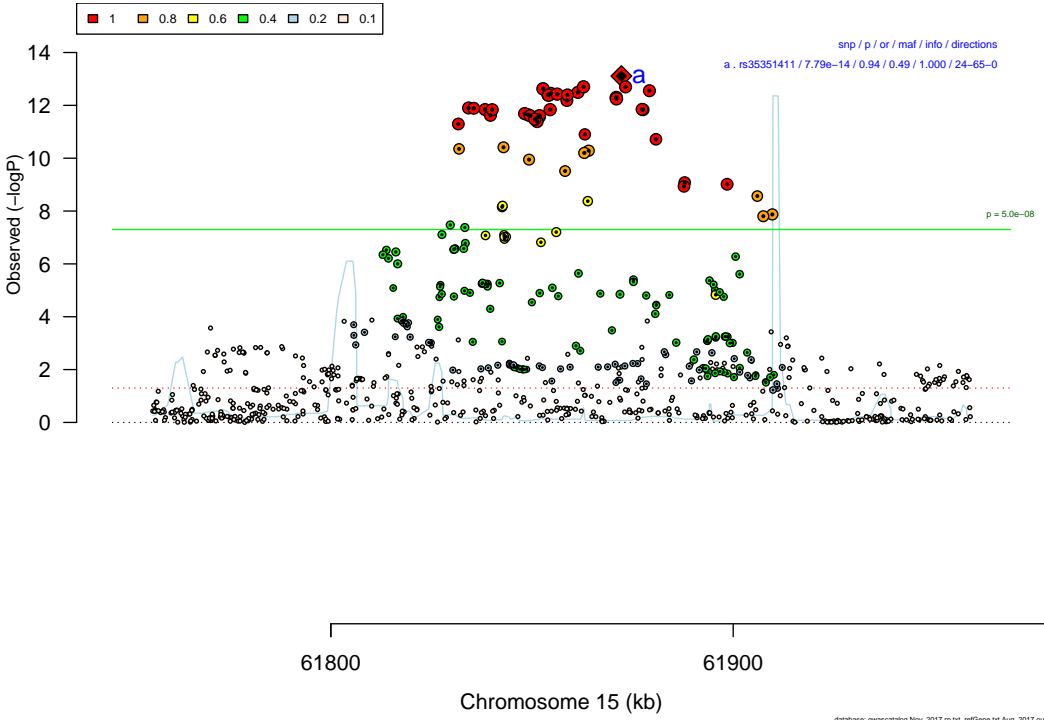

### SCZ\_cond\_rs35351411-chr15

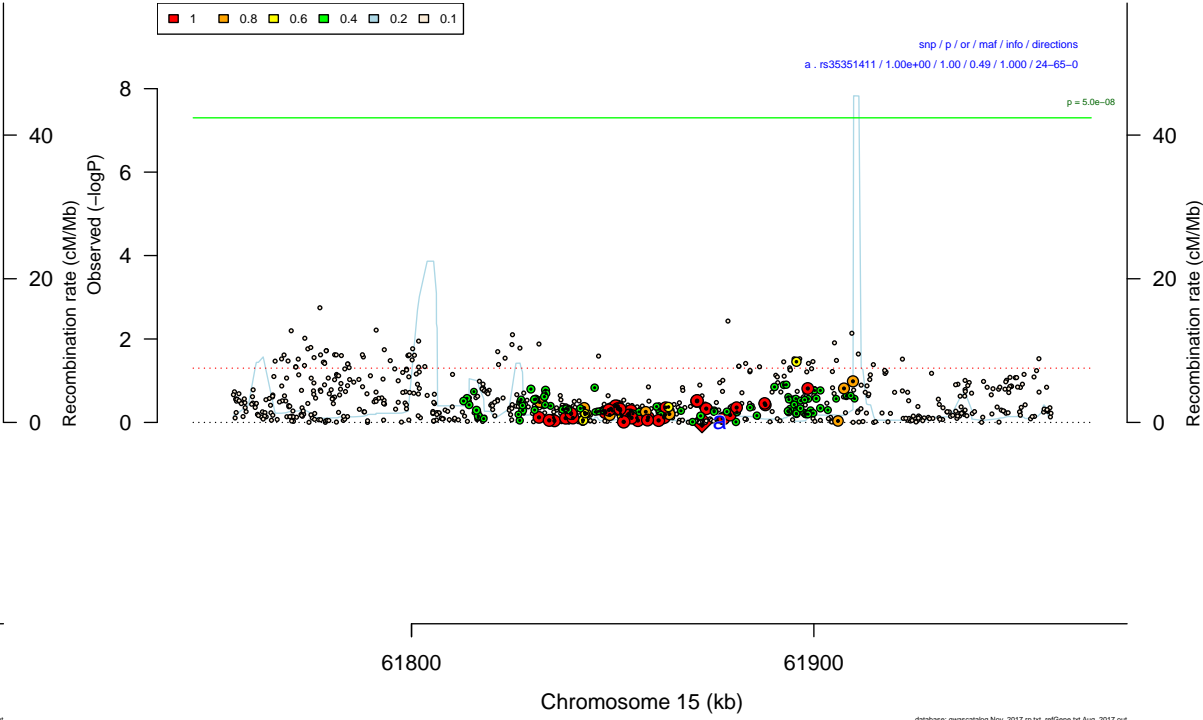

### SCZ\_uncond-rs9545047-chr13

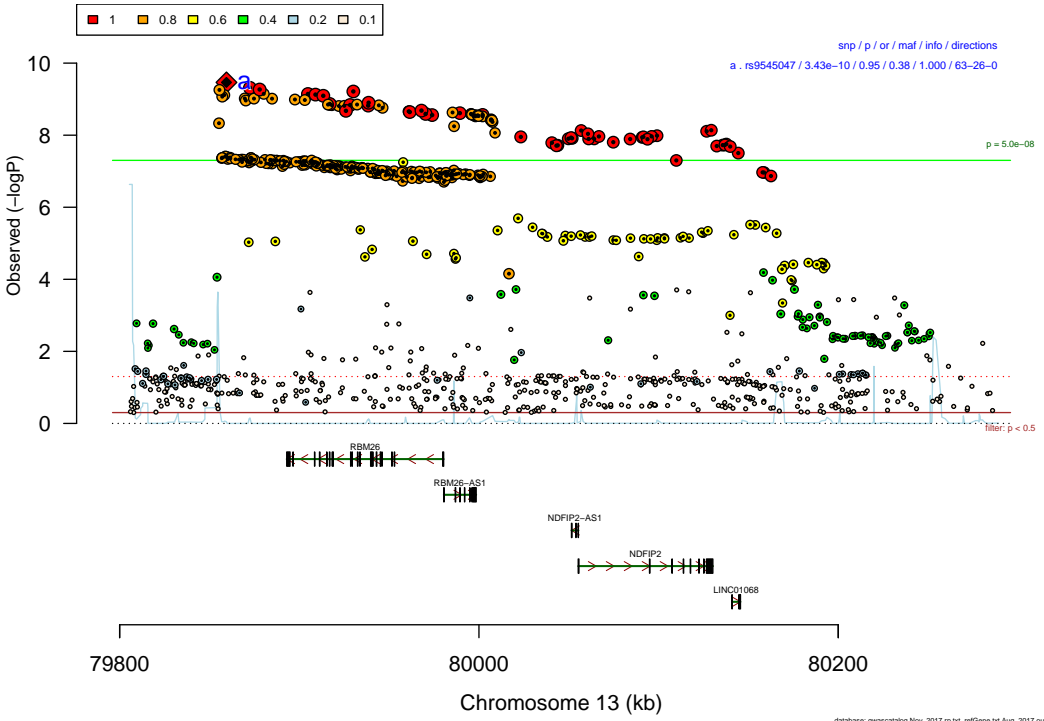

### SCZ\_cond\_rs9545047-chr13

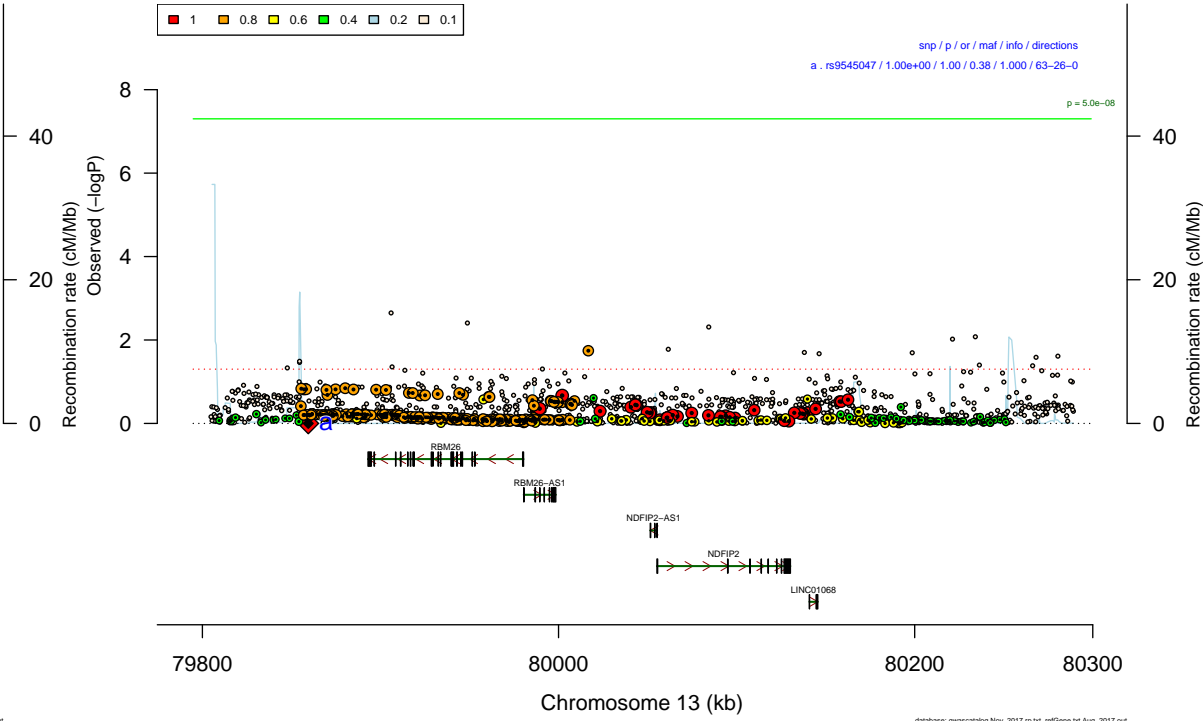

### SCZ\_uncond-rs2252074-chr7

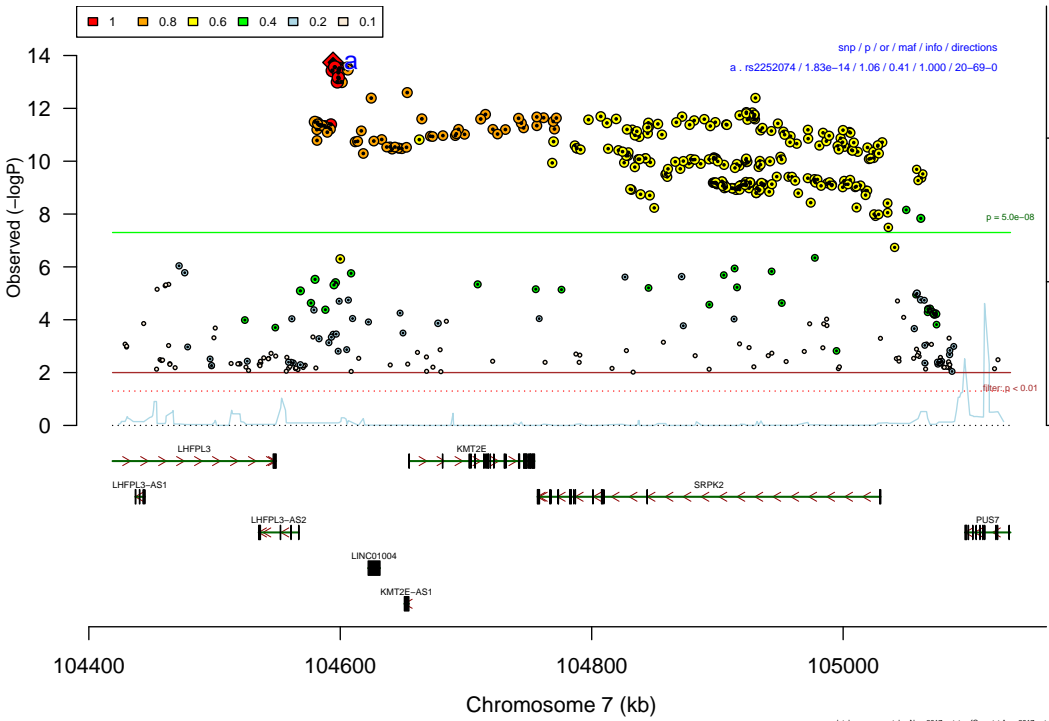

### SCZ\_cond\_rs2252074-chr7

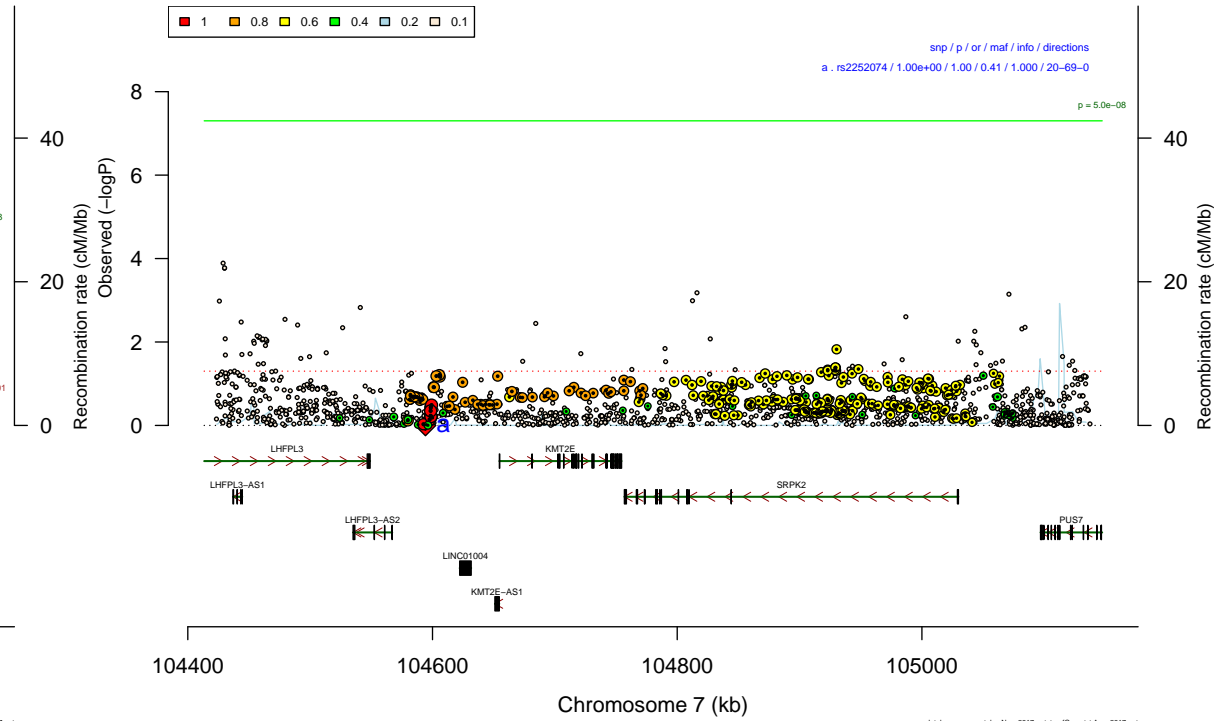



### SCZ\_uncond-rs9636107-chr18

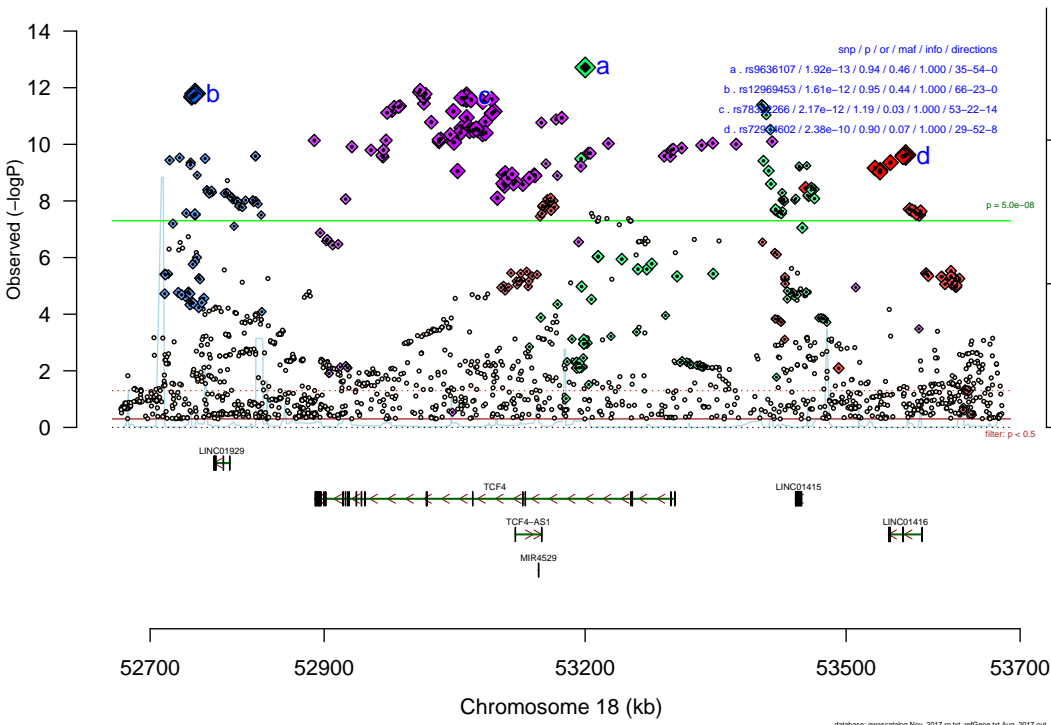

### SCZ\_cond\_rs9636107-chr18

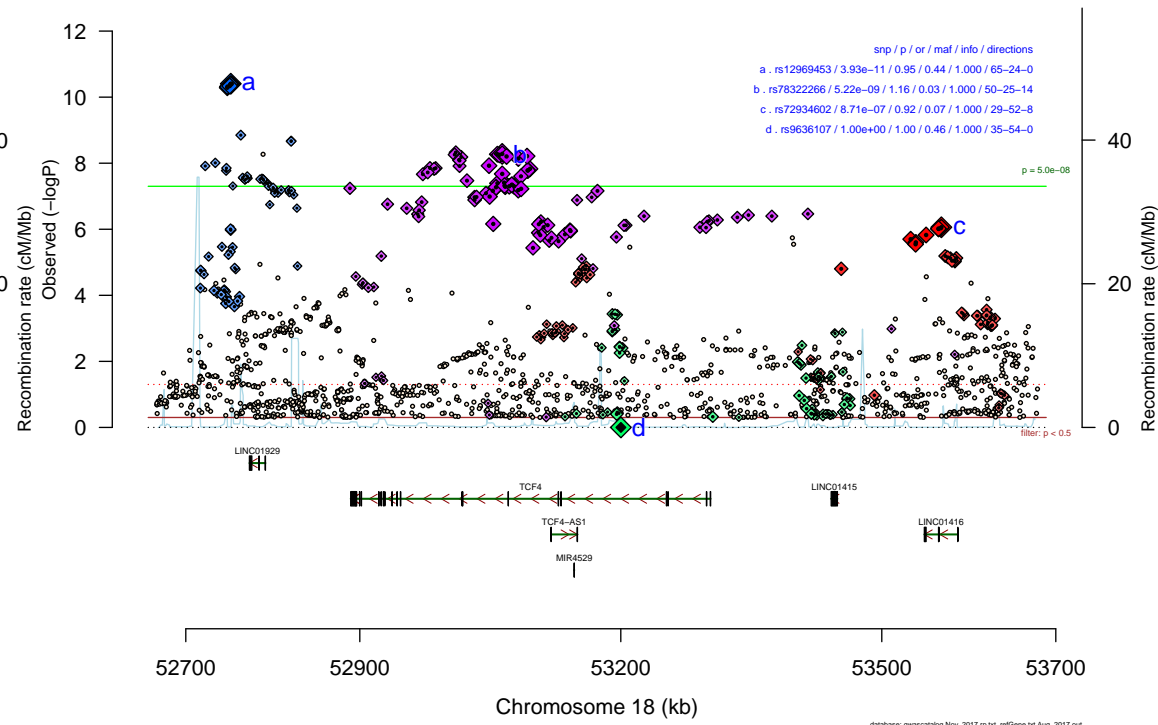

### SCZ\_cond\_rs9636107-rs12969453-chr18

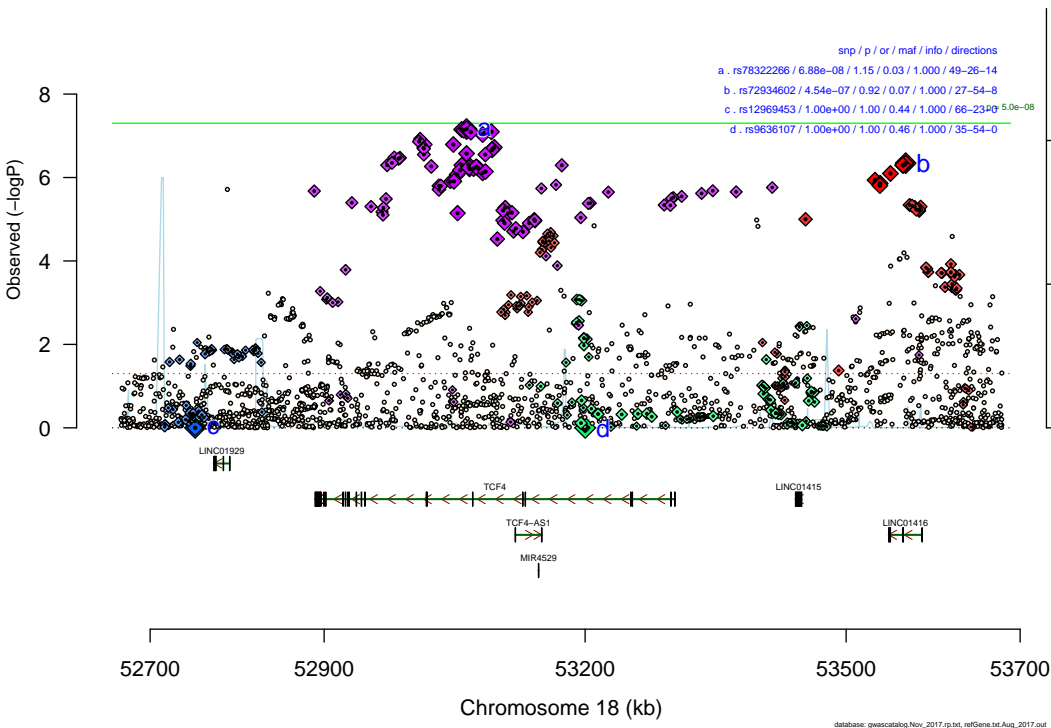

### SCZ\_cond\_rs9636107-rs12969453-rs7832266-chr18

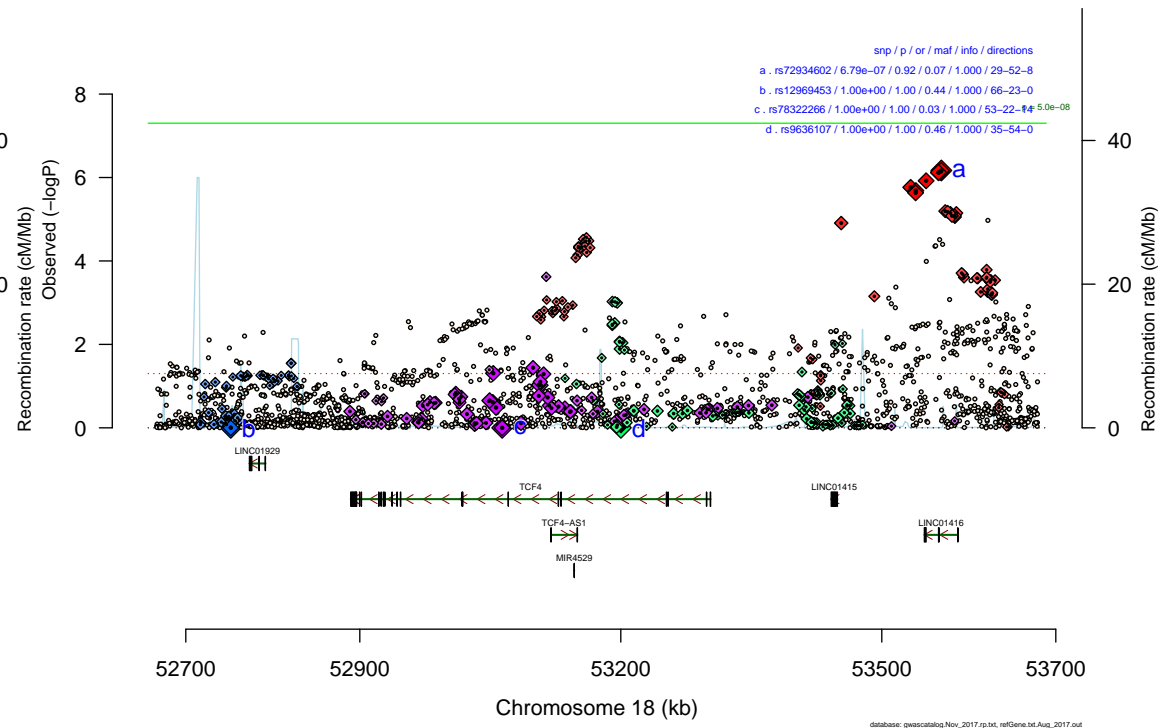



SCZ\_cond\_rs9636107-rs12969453-rs78322266-rs72934602-chr18

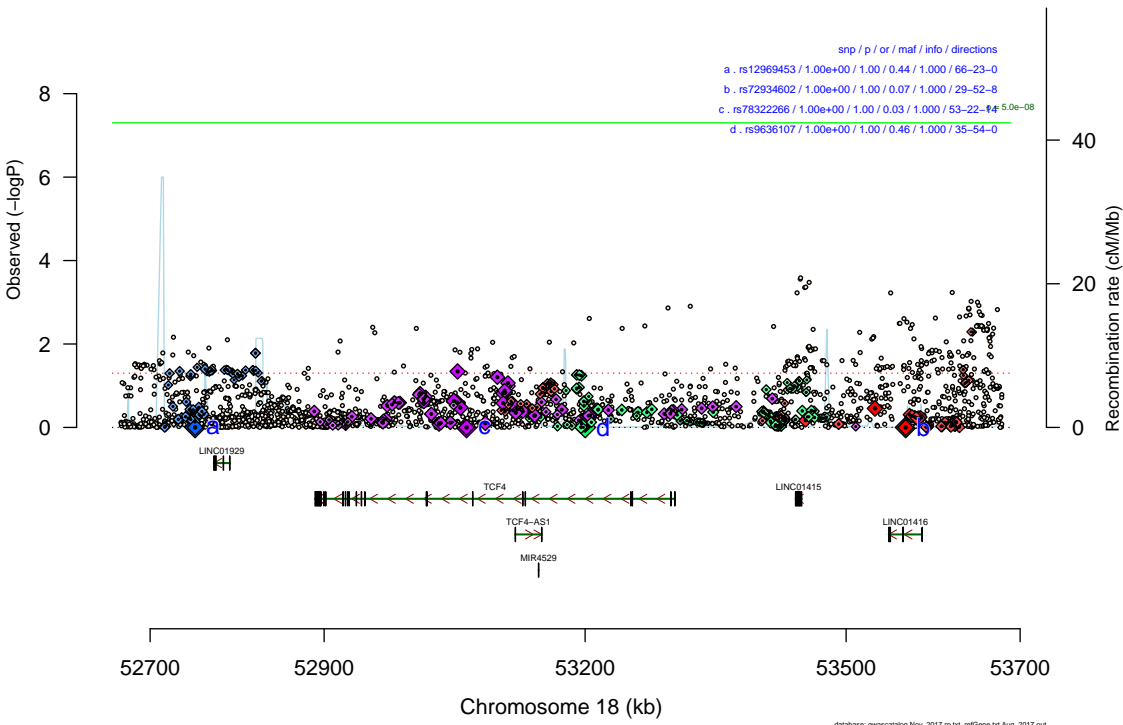

### SCZ\_uncond-rs12883788-chr14

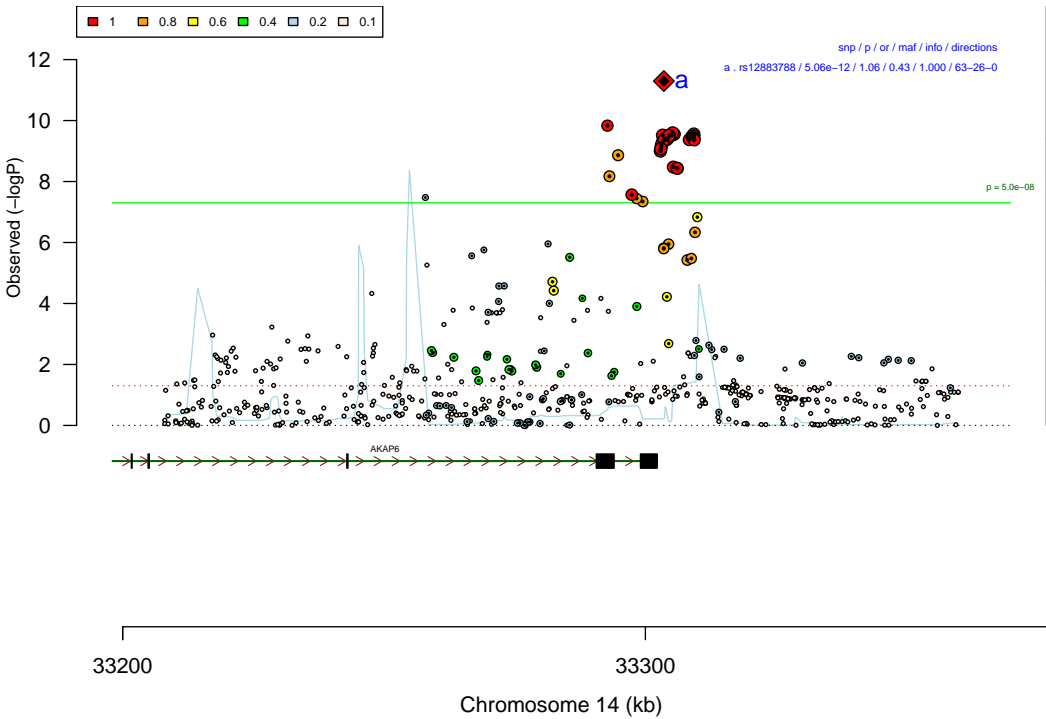

### SCZ\_cond\_rs12883788-chr14

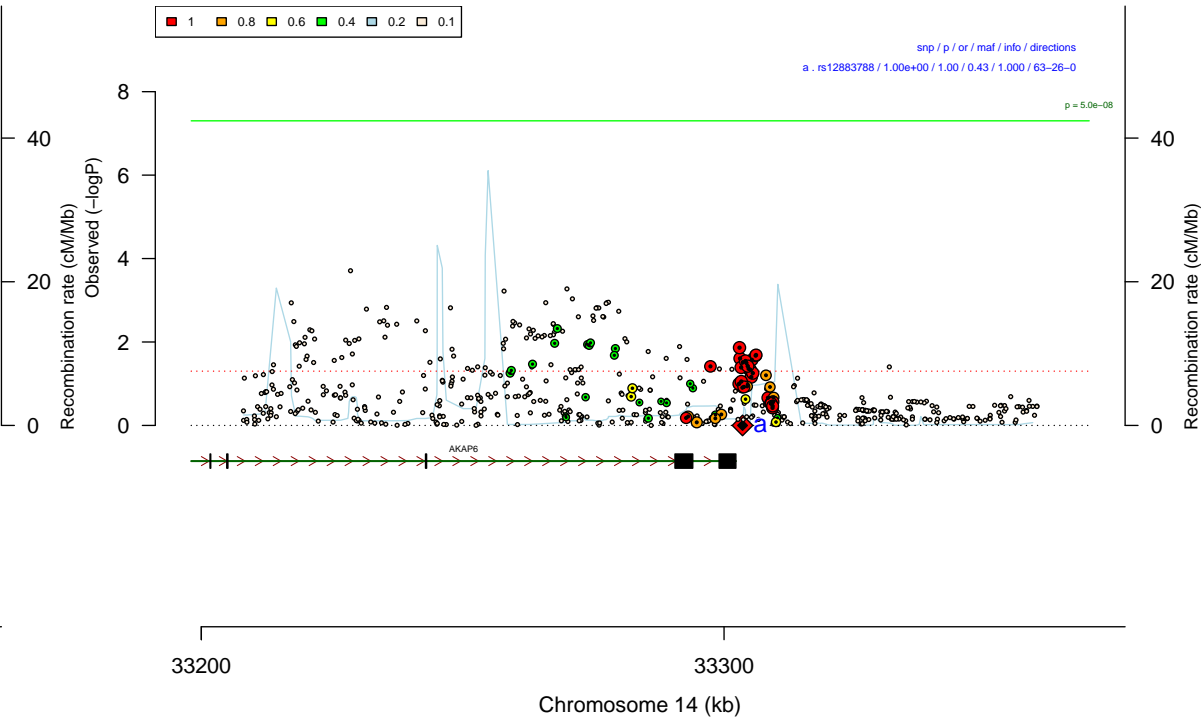

### SCZ\_uncond-rs2914983-chr2

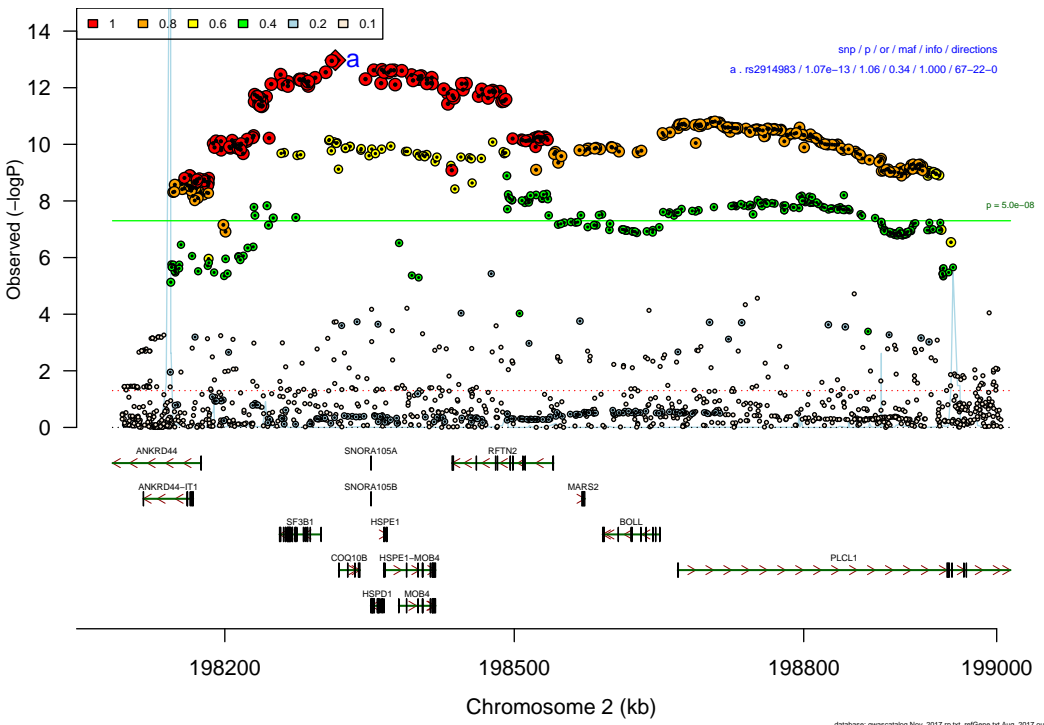

### SCZ\_cond\_rs2914983-chr2

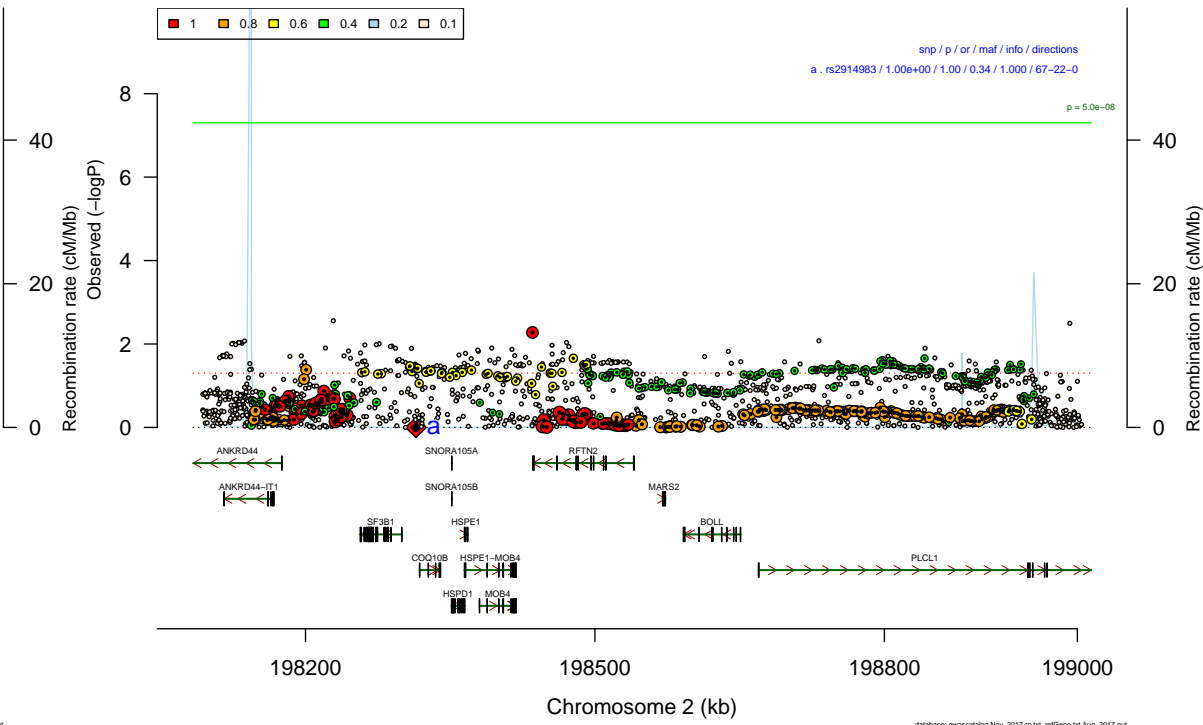

SCZ\_uncond-rs8055219-chr16

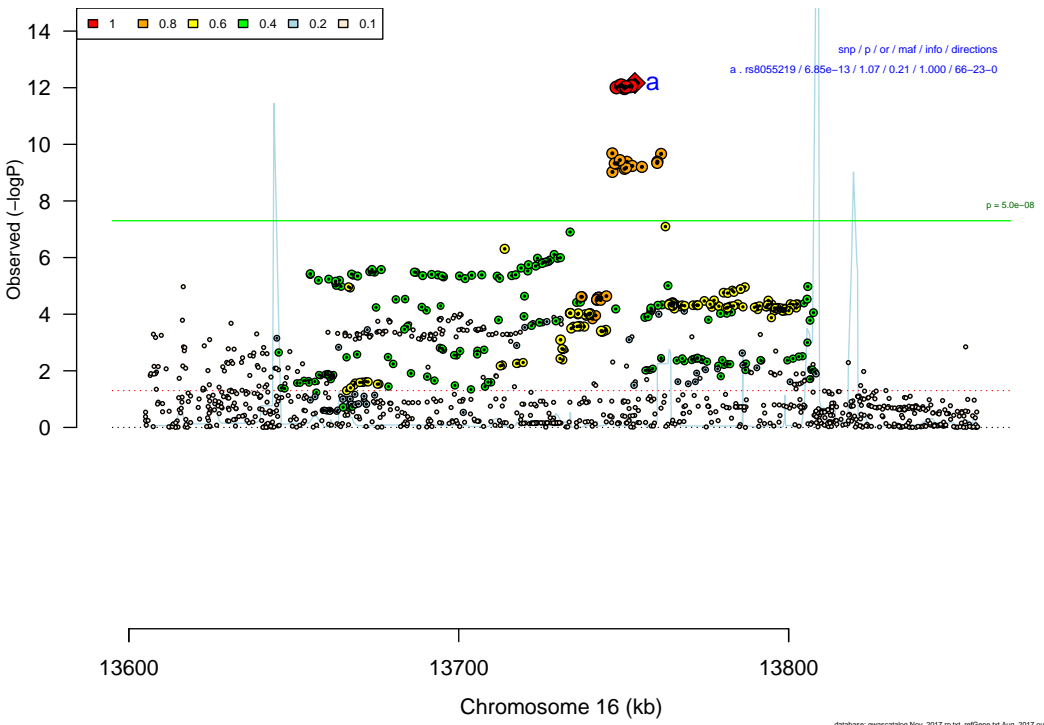

SCZ\_cond\_rs8055219-chr16

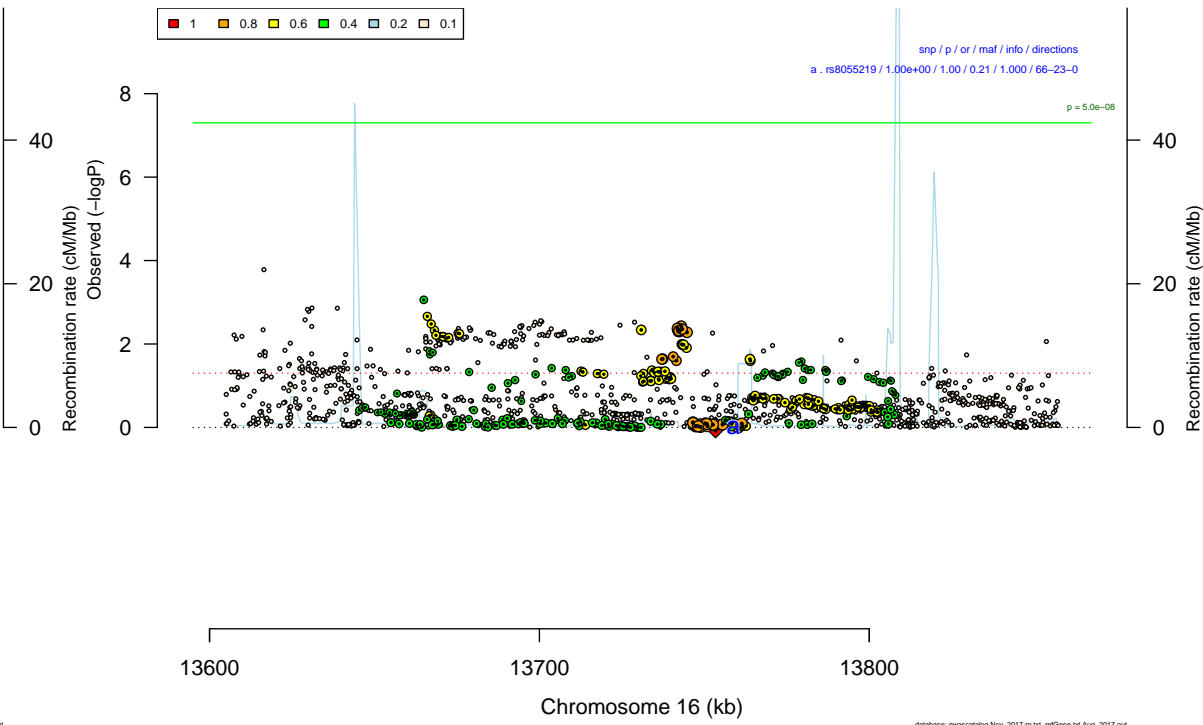

### SCZ\_uncond-rs16825349-chr2

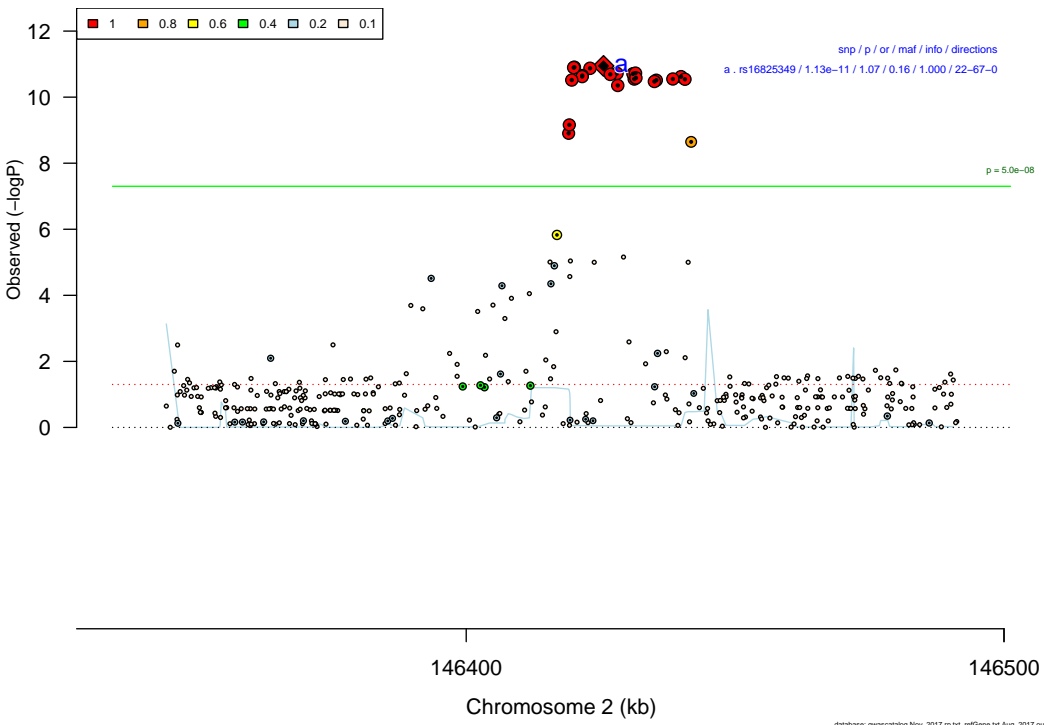

### SCZ\_cond\_rs16825349-chr2

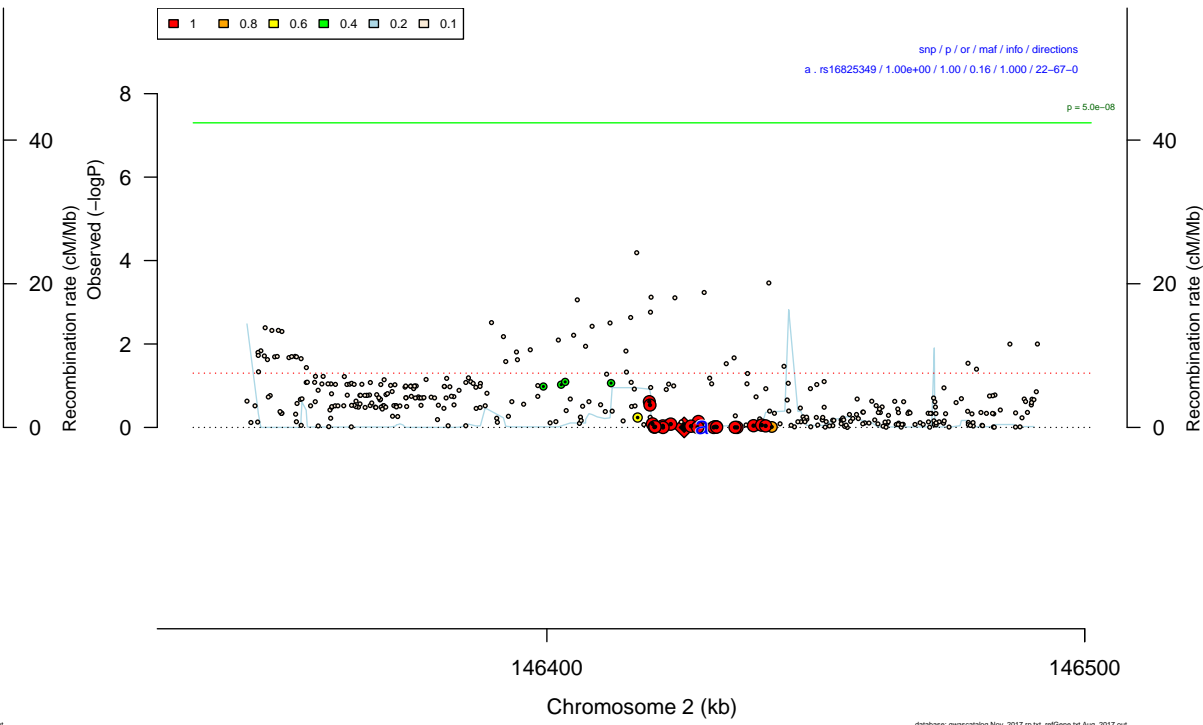

### SCZ\_uncond-rs1440480-chr11

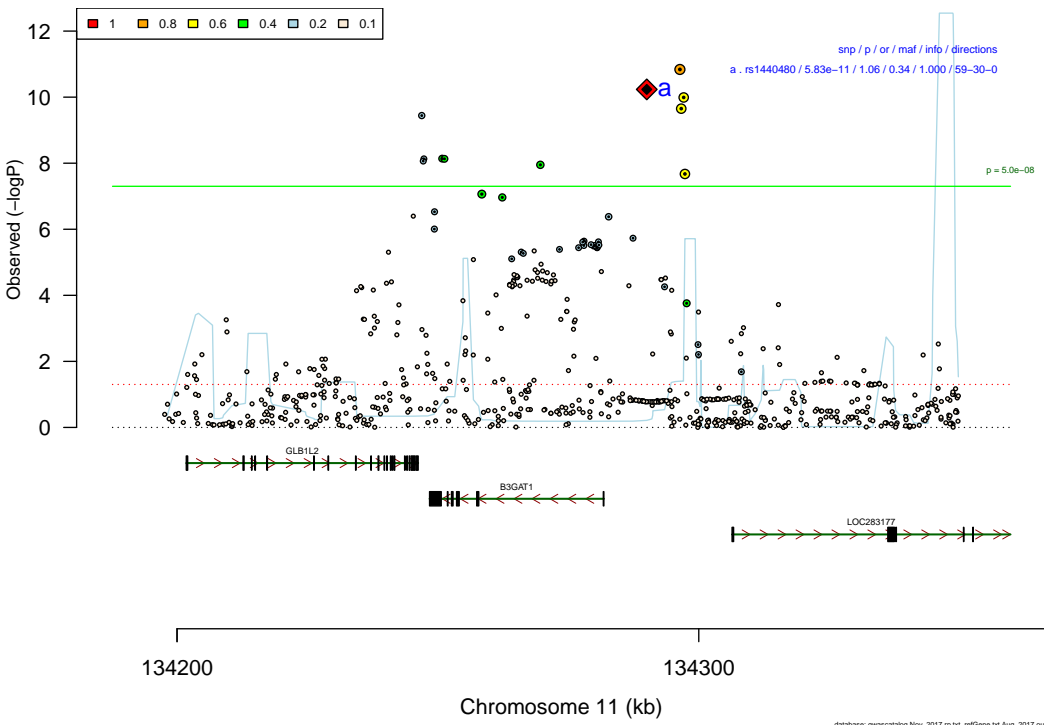

### SCZ\_cond\_rs1440480-chr11

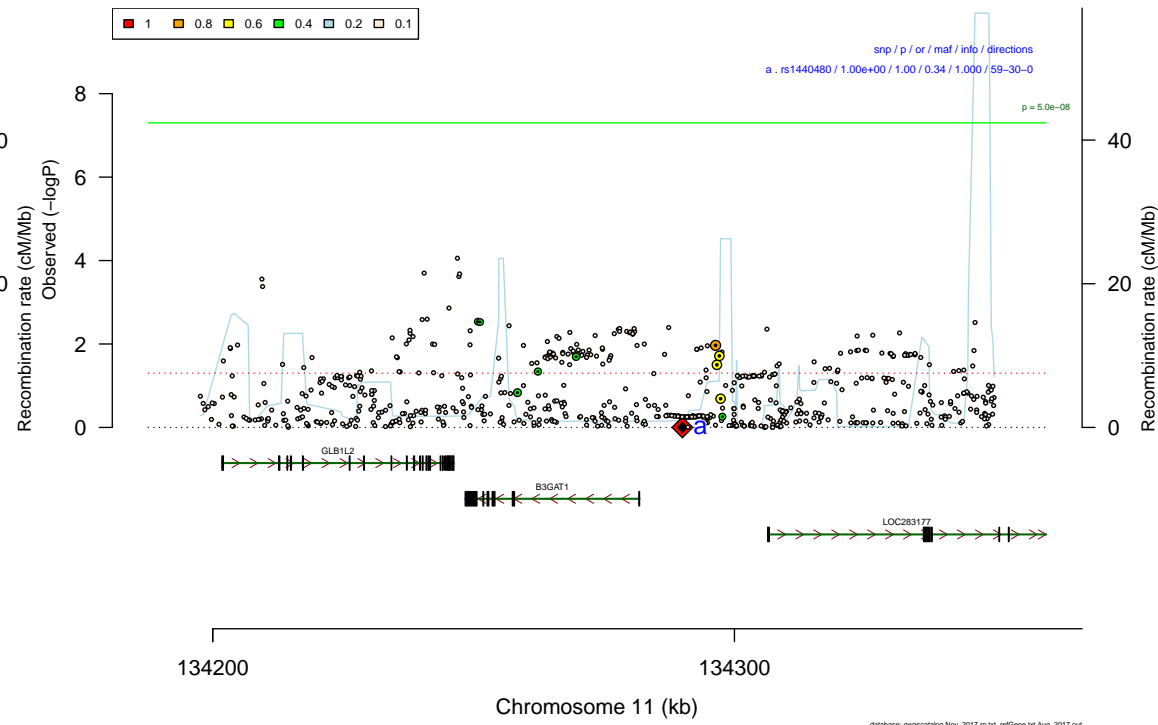

SCZ\_uncond-rs6969410-chr7

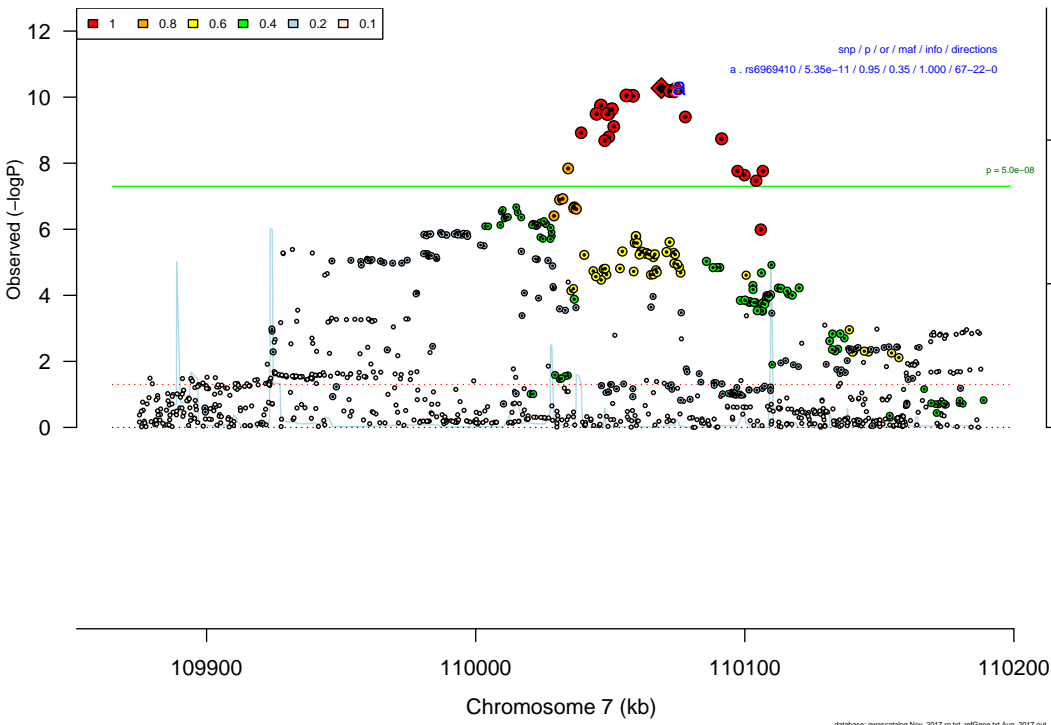

SCZ\_cond\_rs6969410-chr7

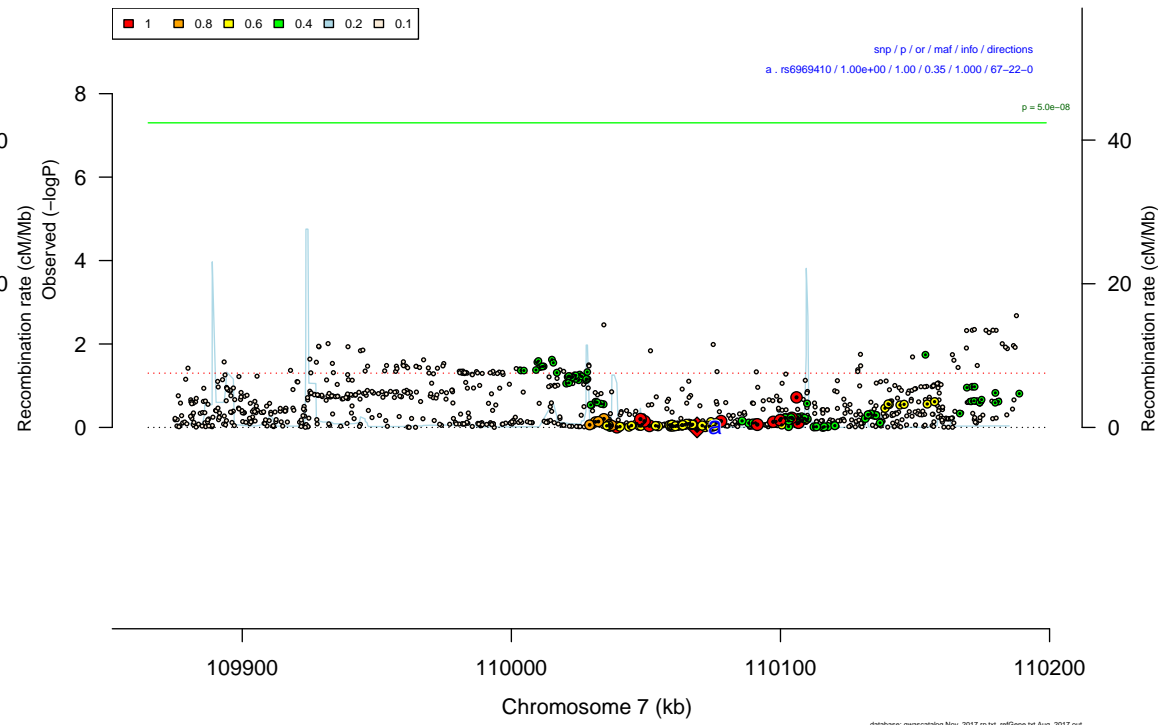

### SCZ\_uncond-rs1940171-chr11

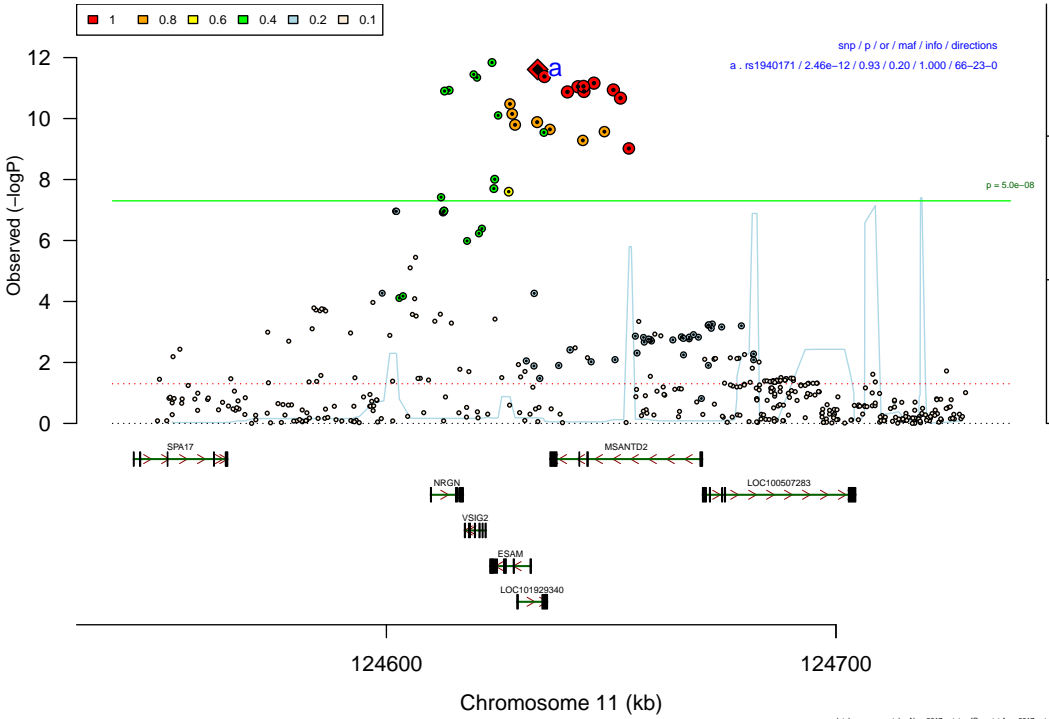

### SCZ\_cond\_rs1940171-chr11

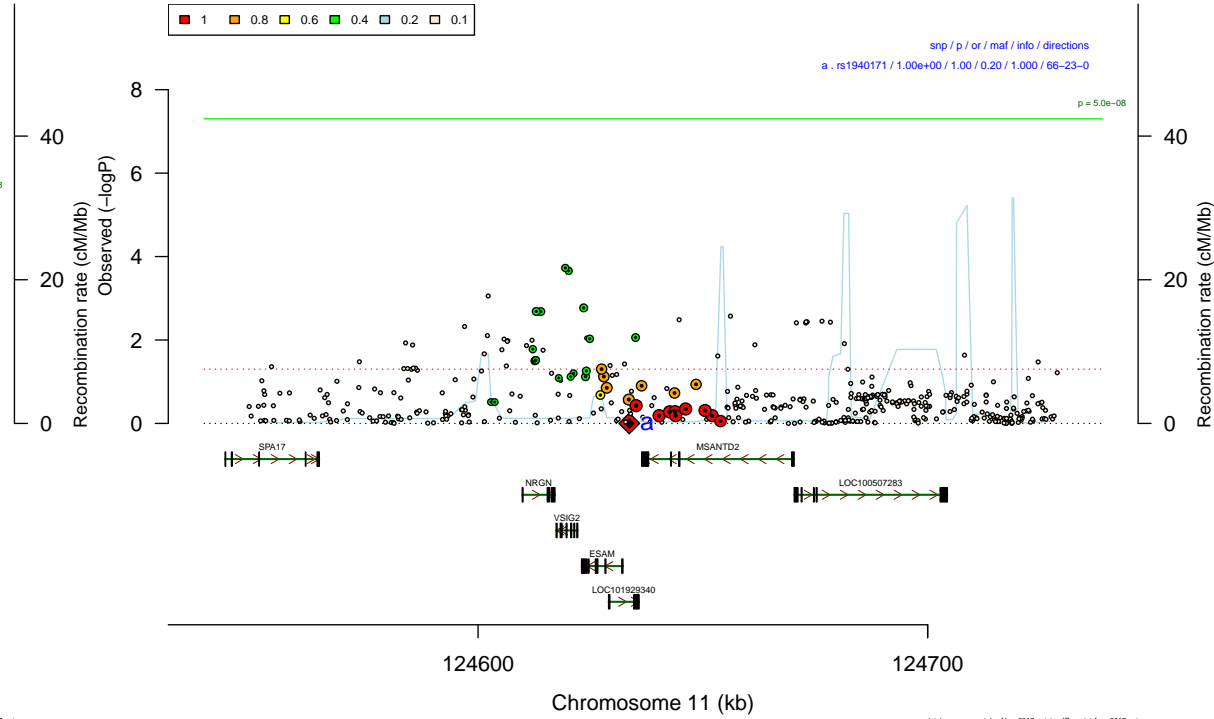



### SCZ\_uncond-rs61833239-chr1

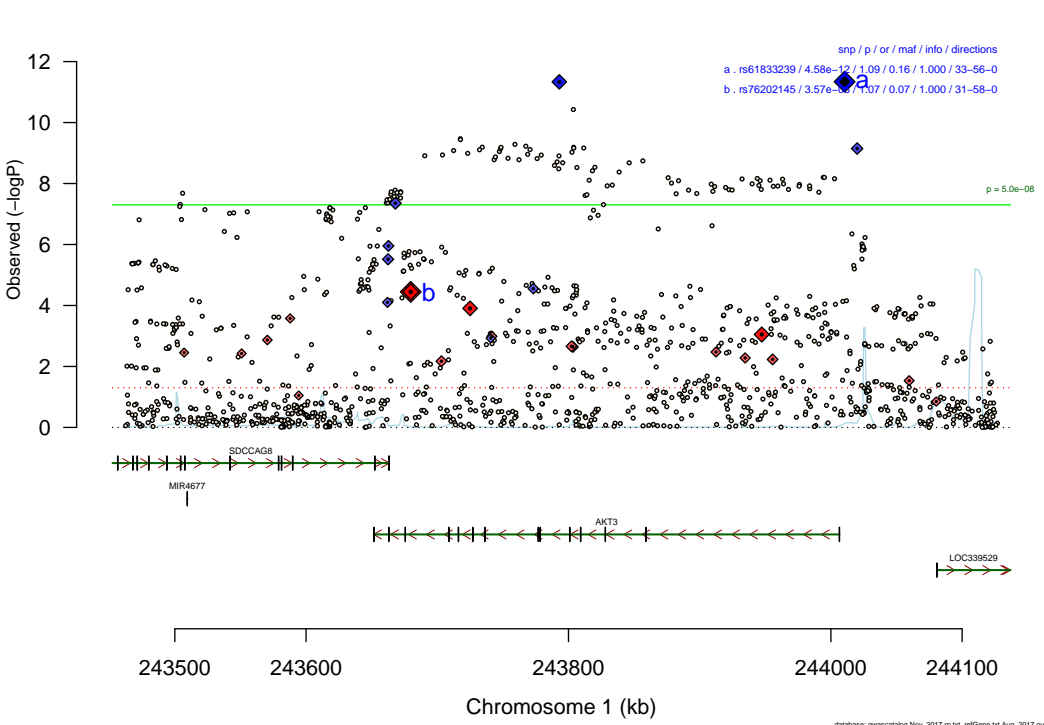

### SCZ\_cond\_rs61833239-chr1

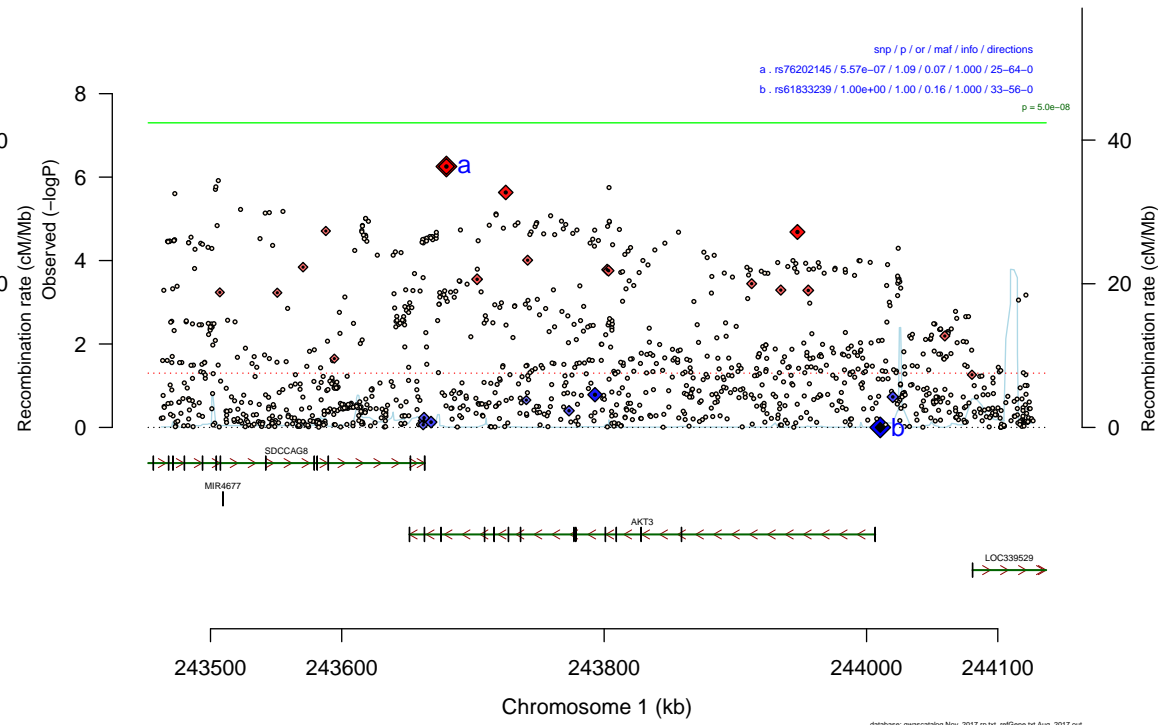

### SCZ\_cond\_rs61833239-rs76202145-chr1

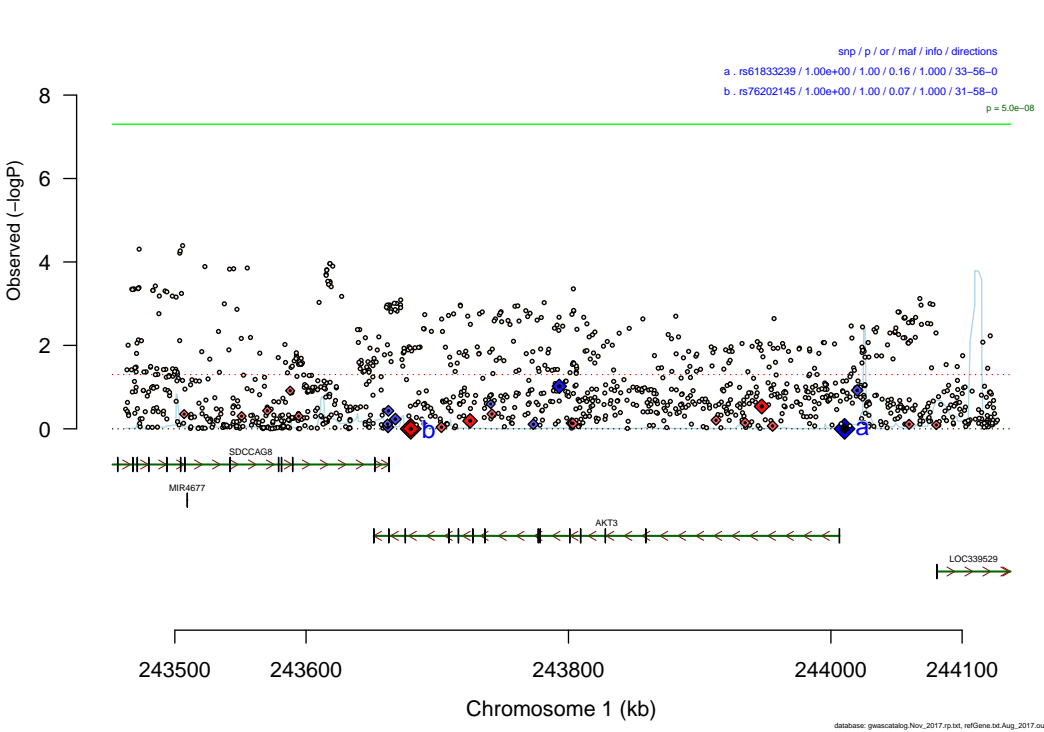

### SCZ\_uncond-rs715170-chr18

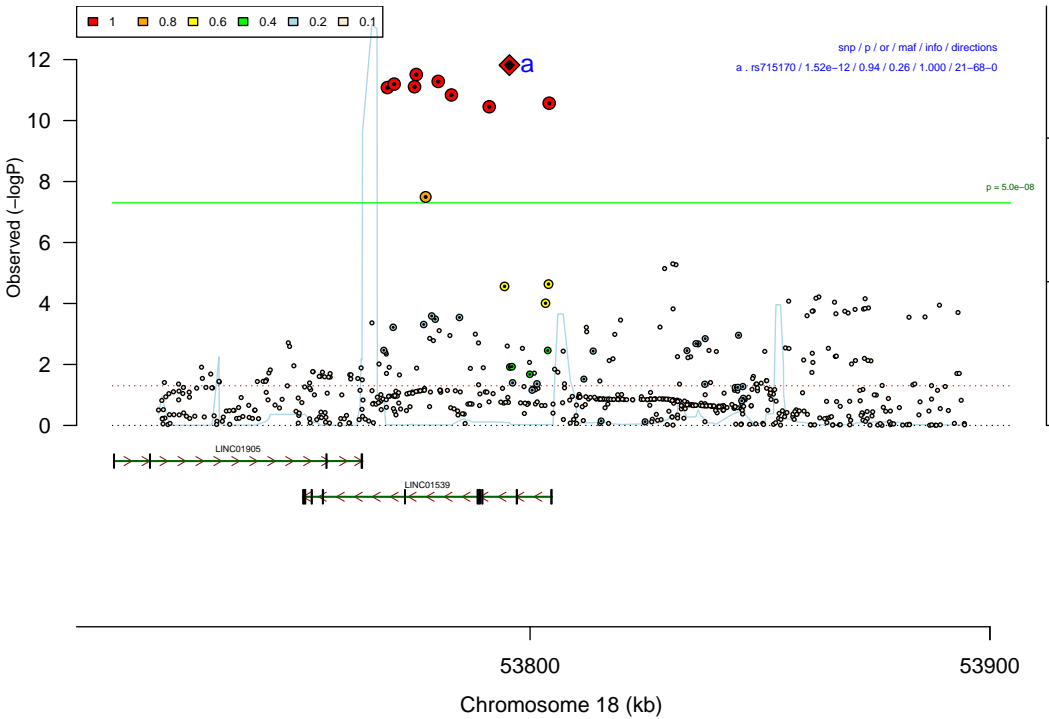

### SCZ\_cond\_rs715170-chr18

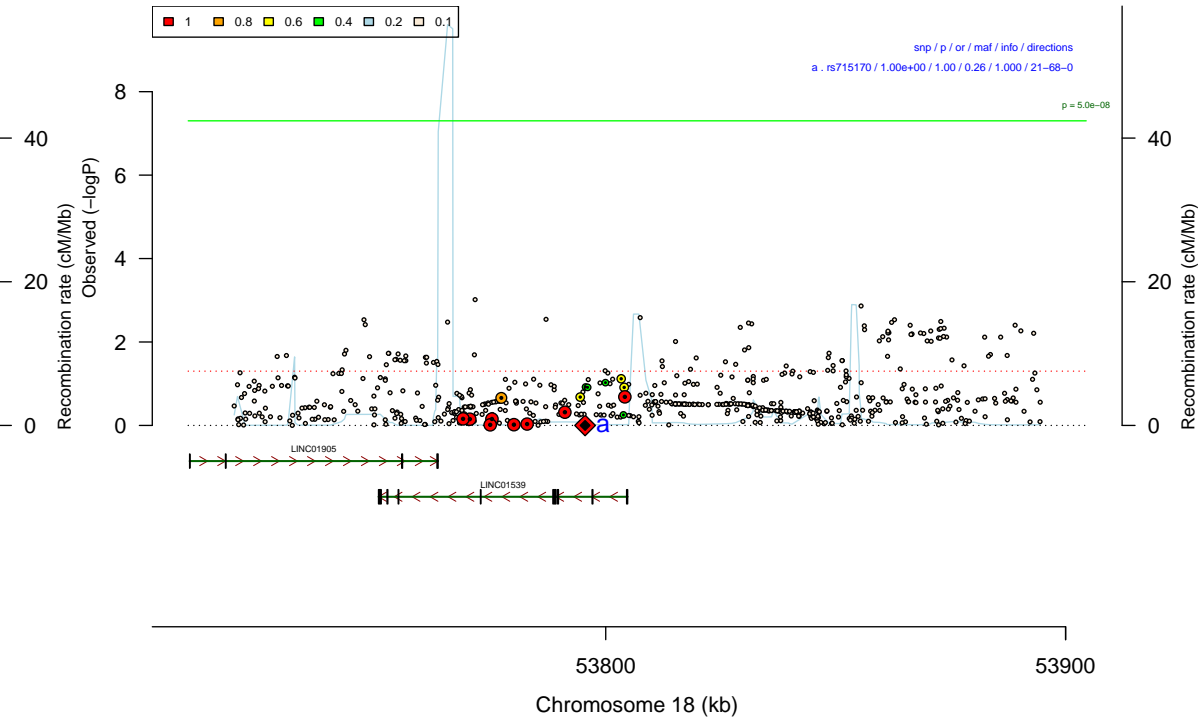

SCZ\_uncond-rs3770752-chr2

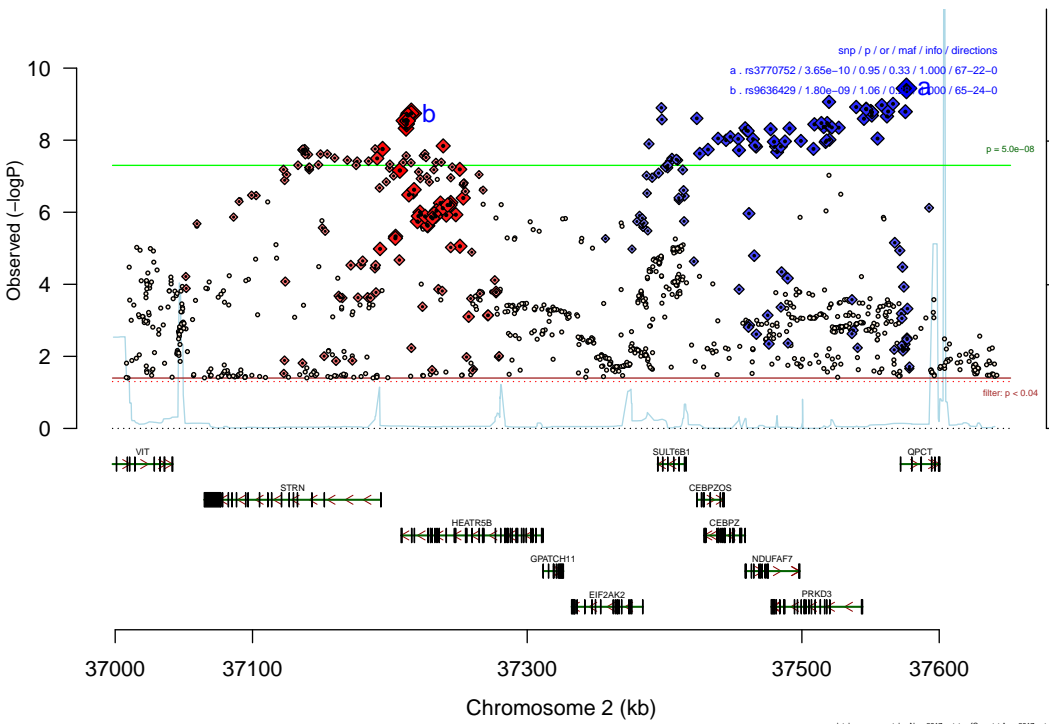

SCZ\_cond\_rs3770752-chr2

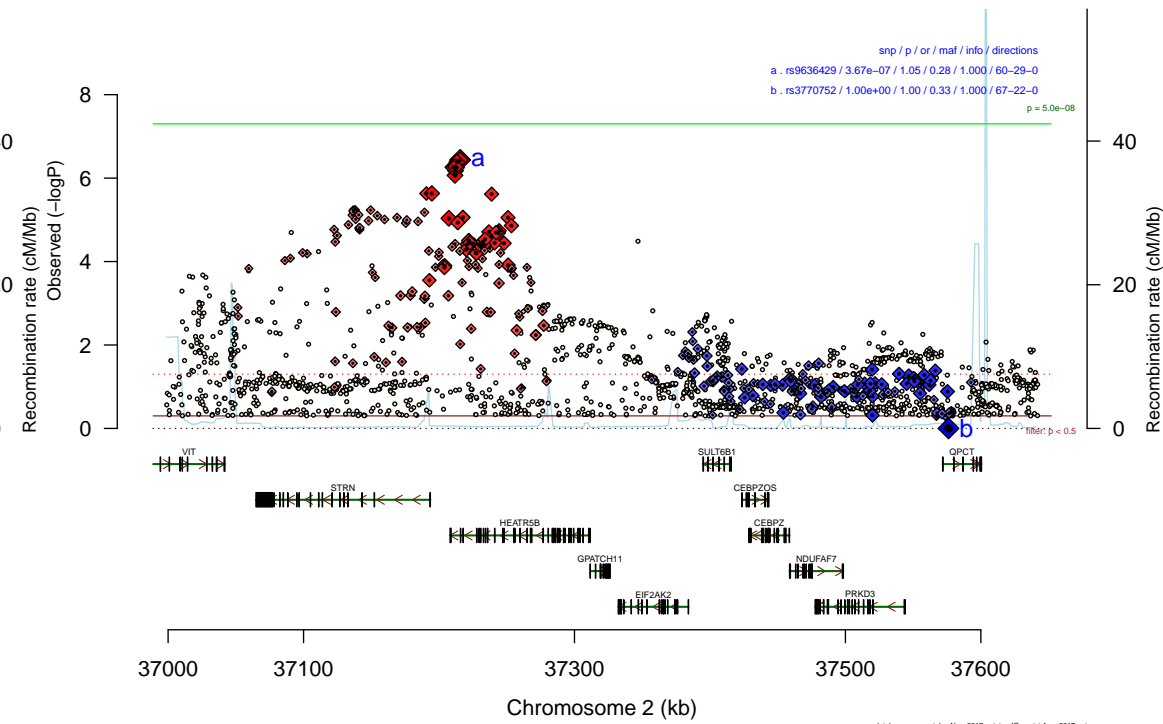

SCZ\_cond\_rs3770752-rs9636429-chr2

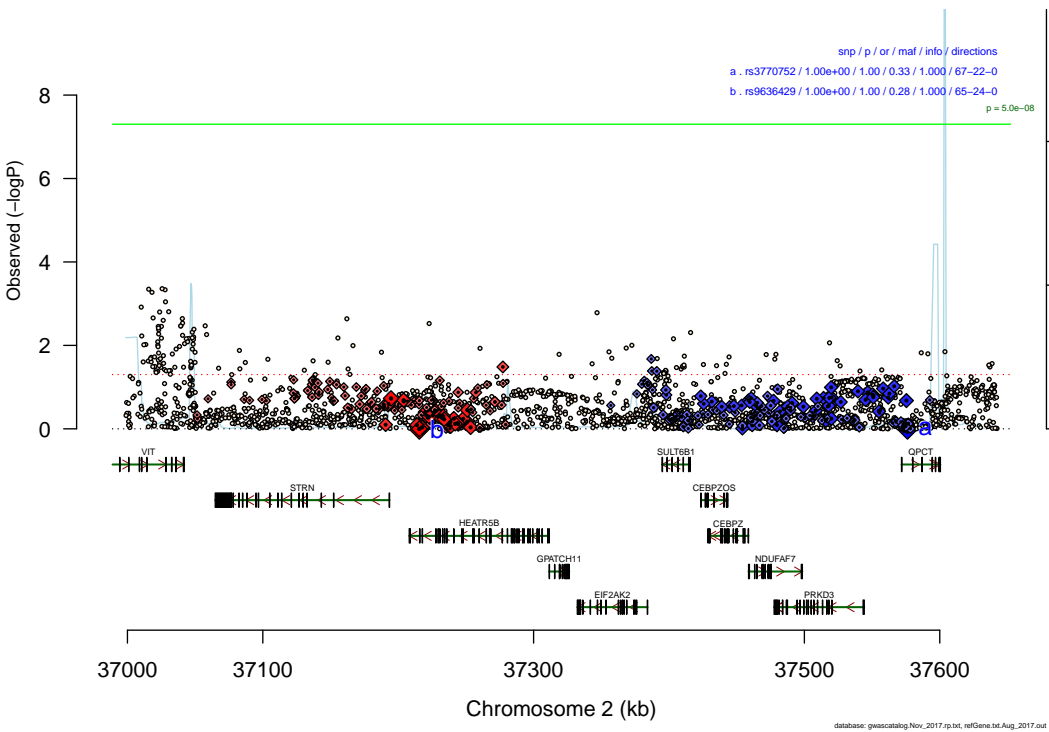

### SCZ\_uncond-rs73229090-chr8

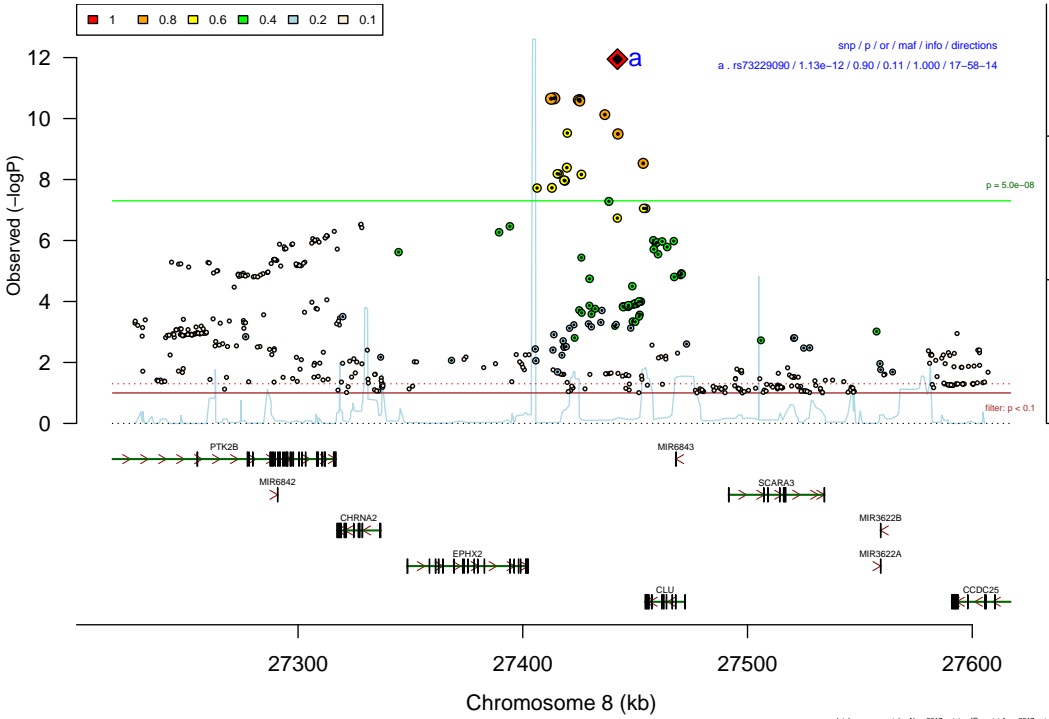

### SCZ\_cond\_rs73229090-chr8

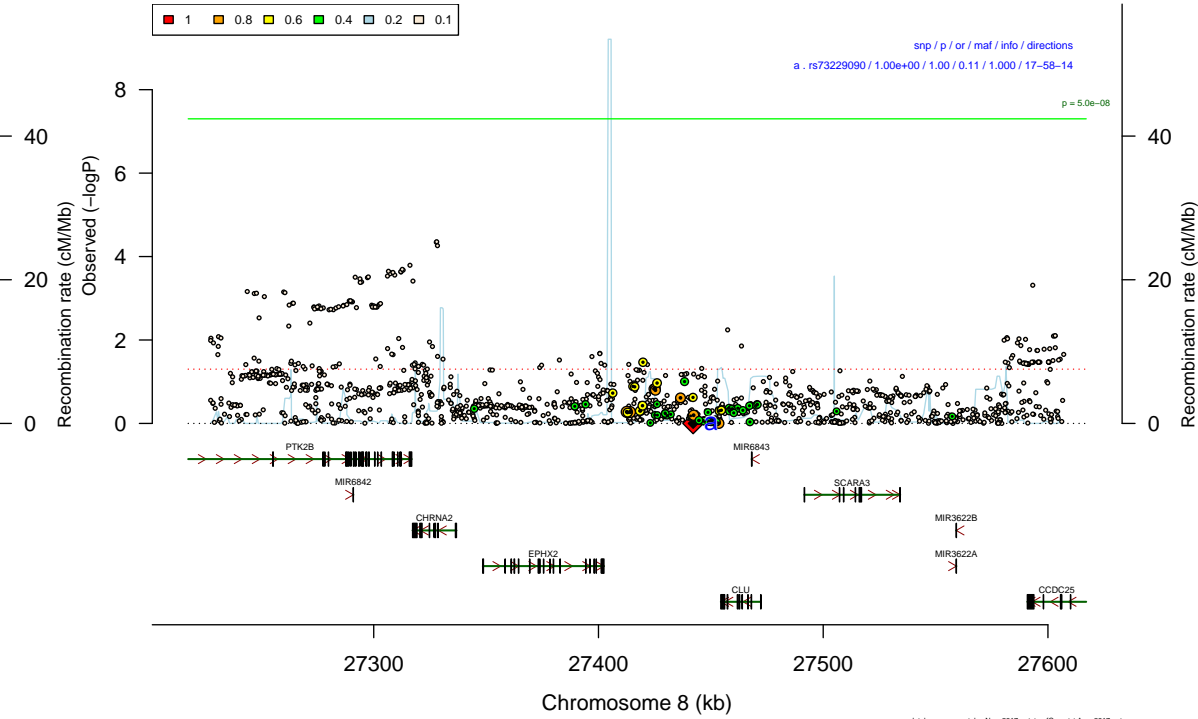

### SCZ\_uncond-rs6673880-chr1

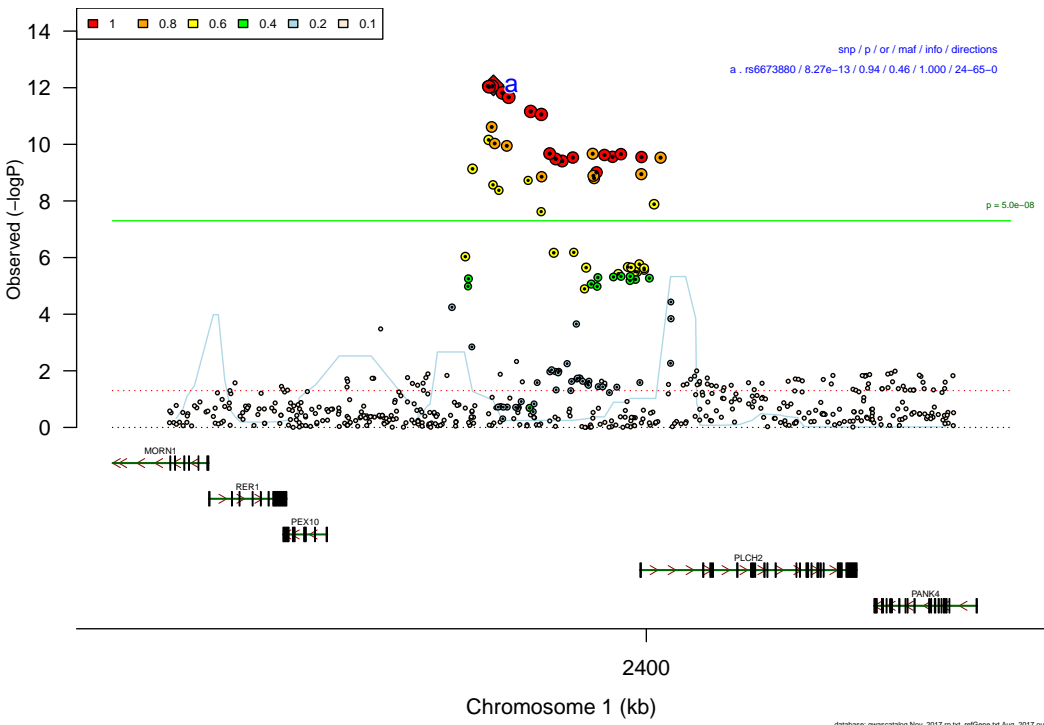

### SCZ\_cond\_rs6673880-chr1

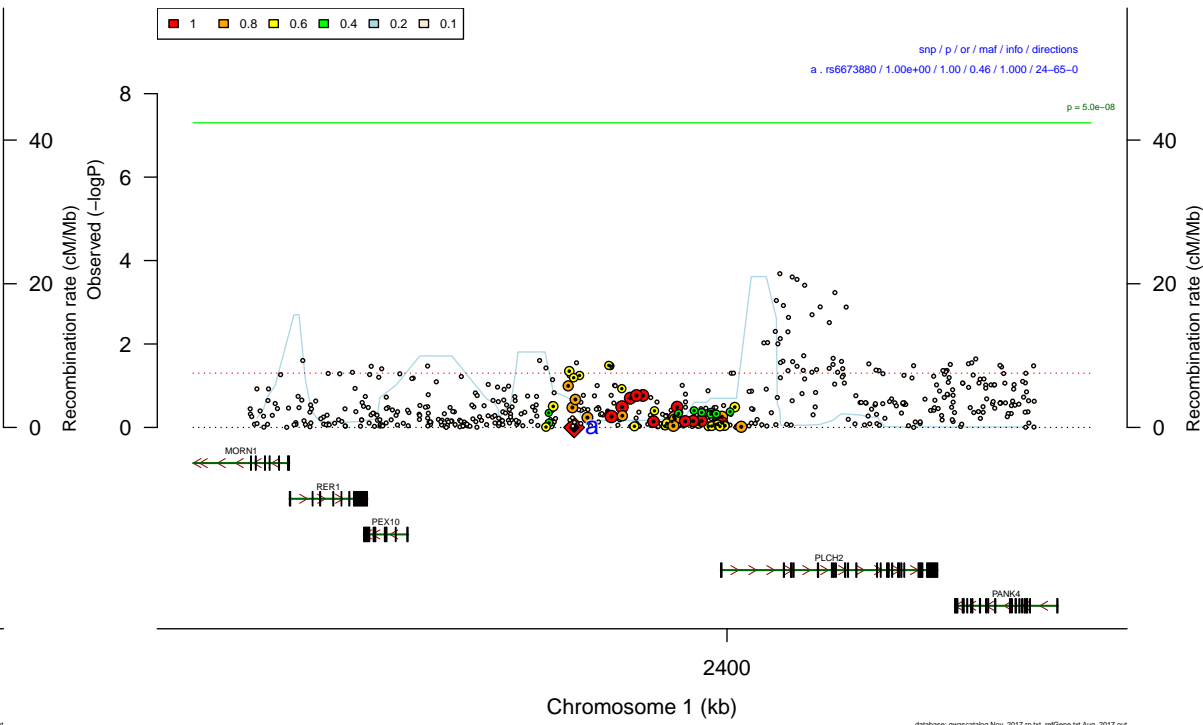

### SCZ\_uncond-rs505061-chr9

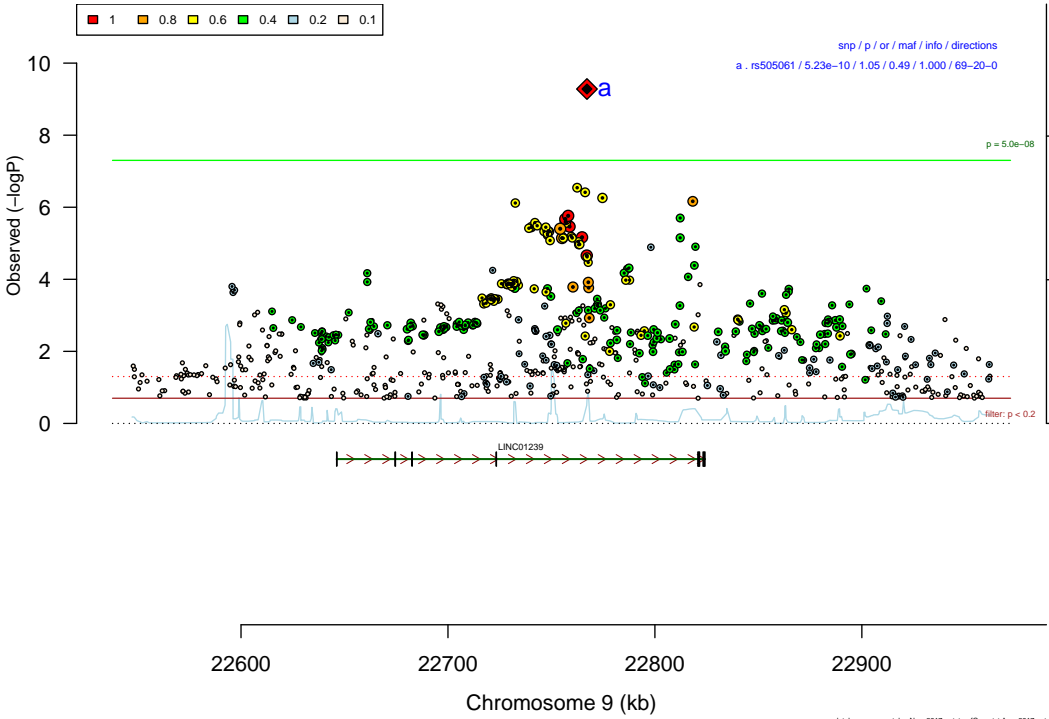

### SCZ\_cond\_rs505061-chr9

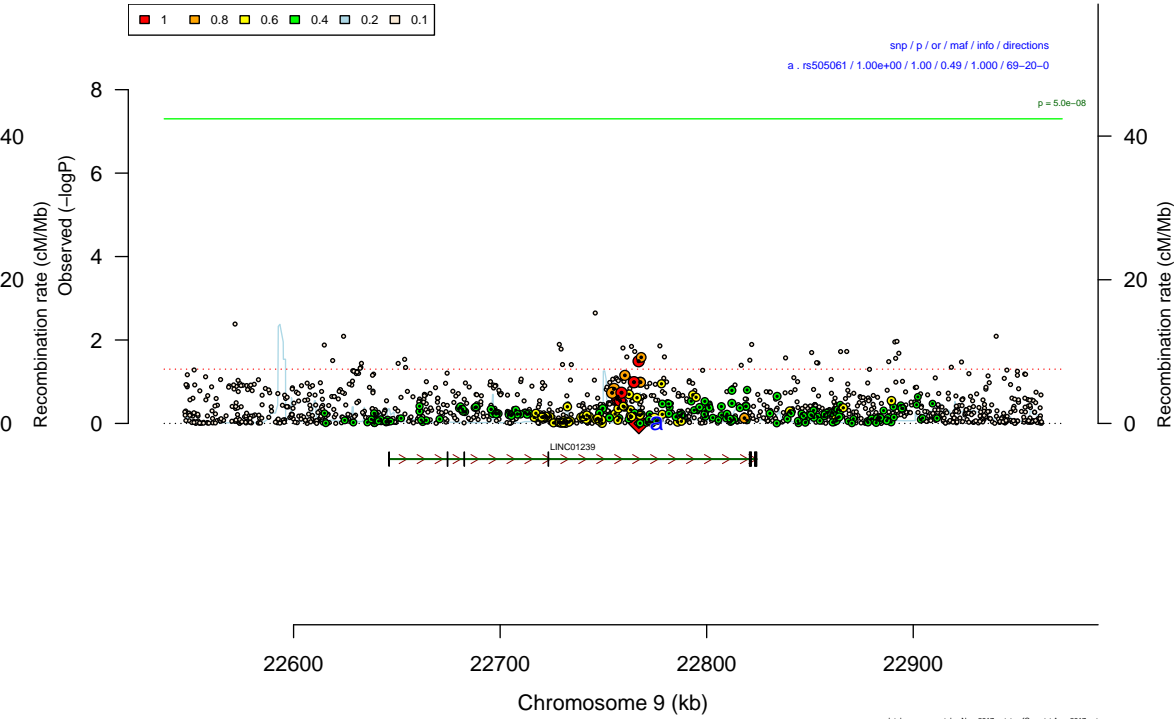

### SCZ\_uncond-rs113113059-chr6

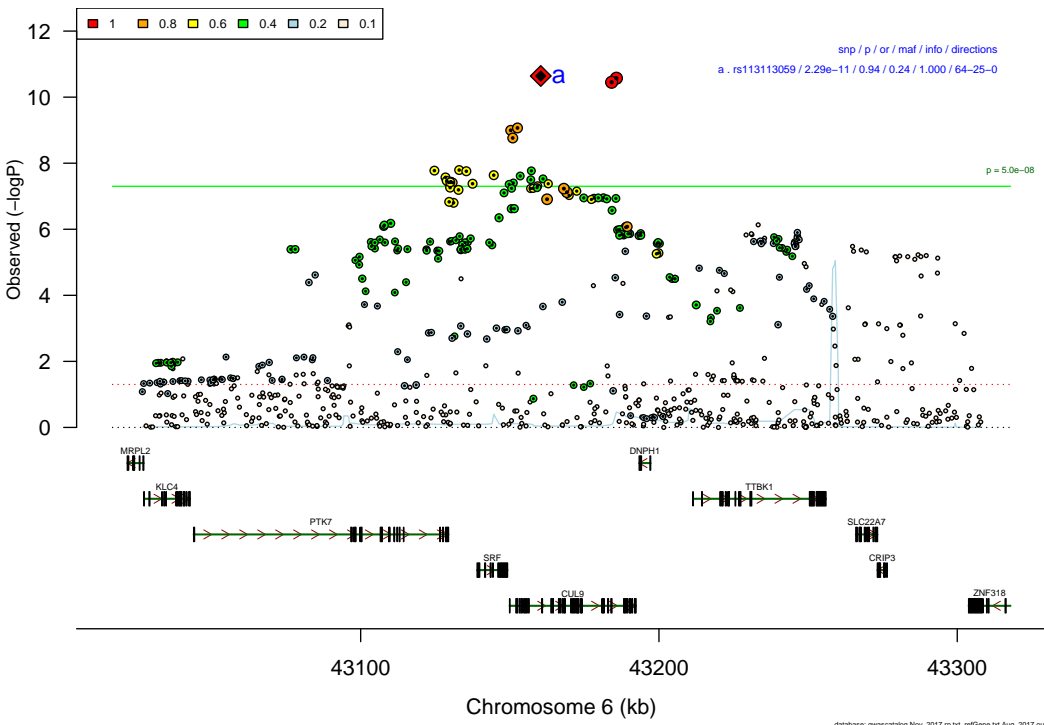

### SCZ\_cond\_rs113113059-chr6

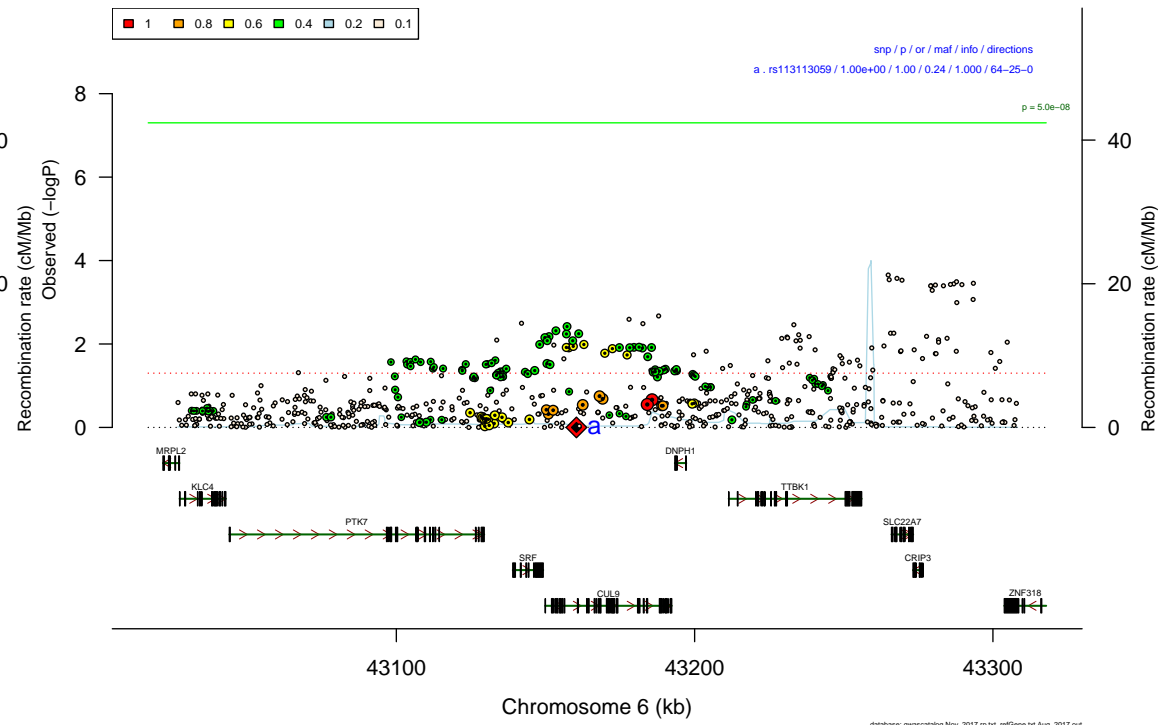

### SCZ\_uncond-rs4073003-chr17

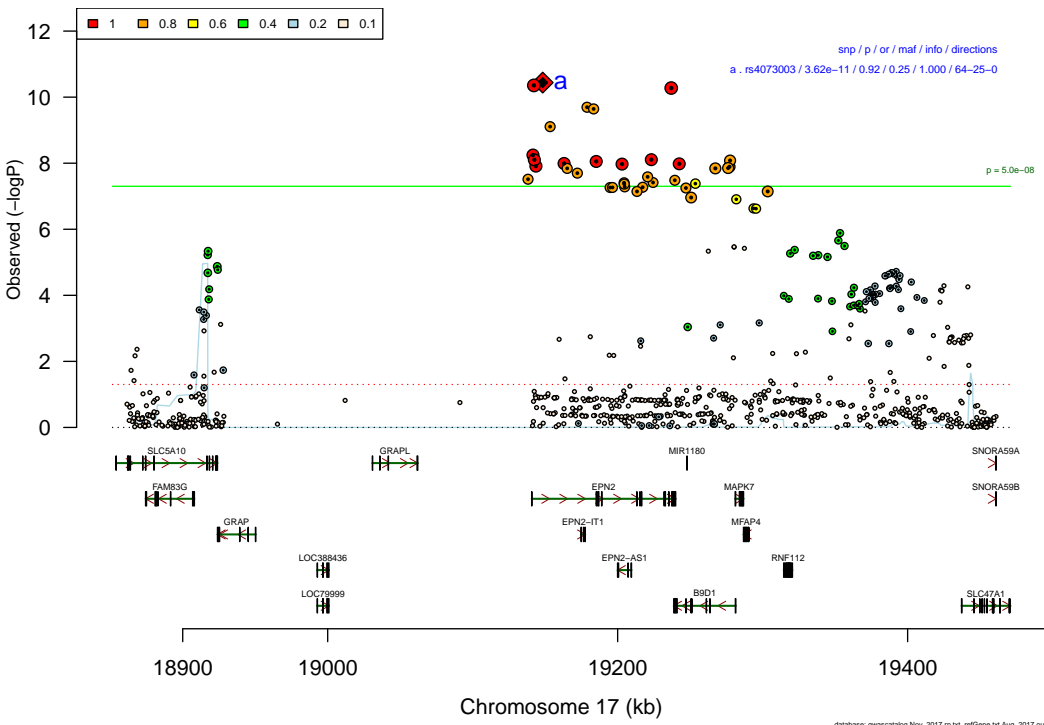

### SCZ\_cond\_rs4073003-chr17

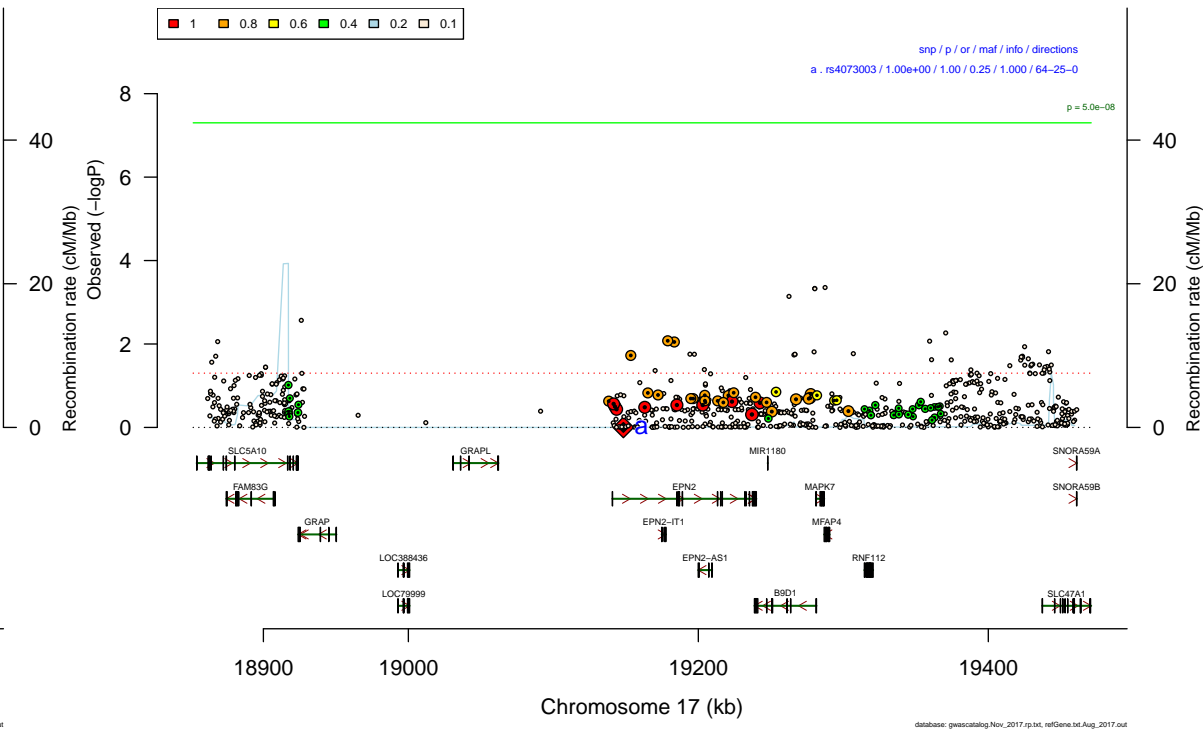



SCZ\_uncond-rs4937935-chr11

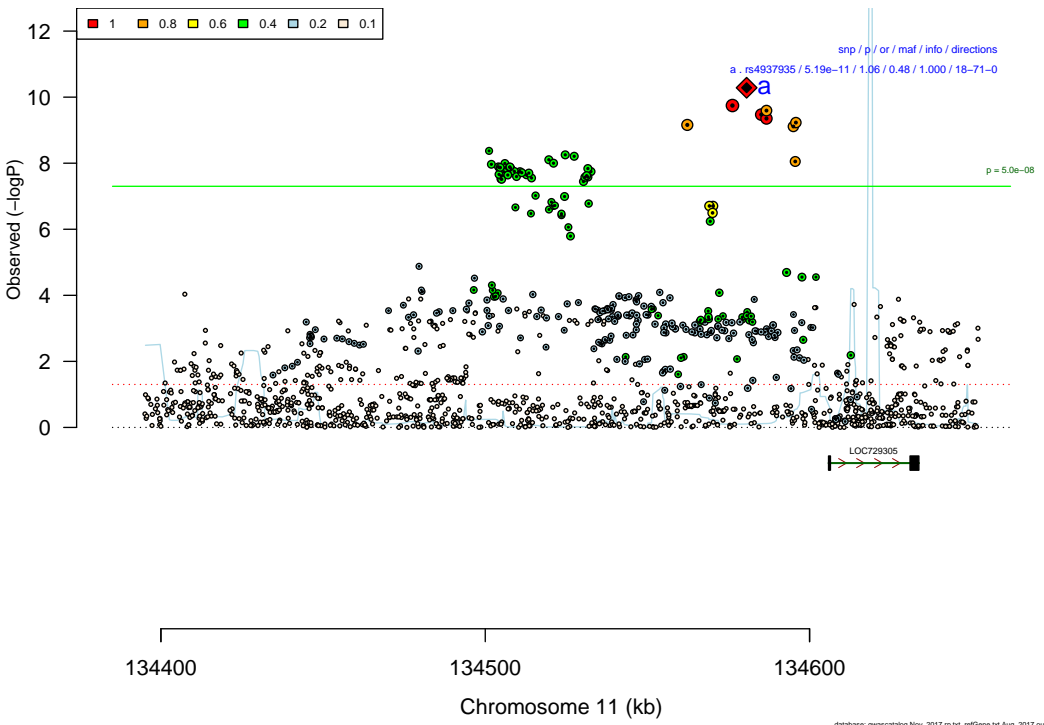

SCZ\_cond\_rs4937935-chr11

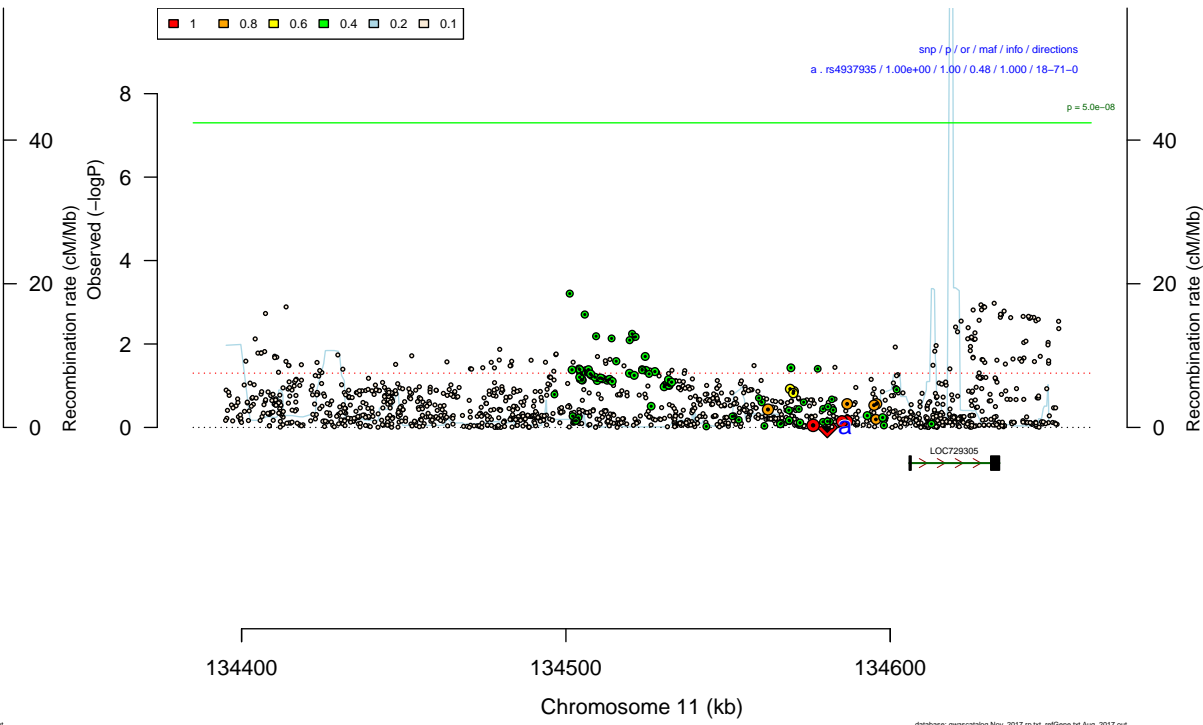

### SCZ\_uncond-rs79210963-chr7

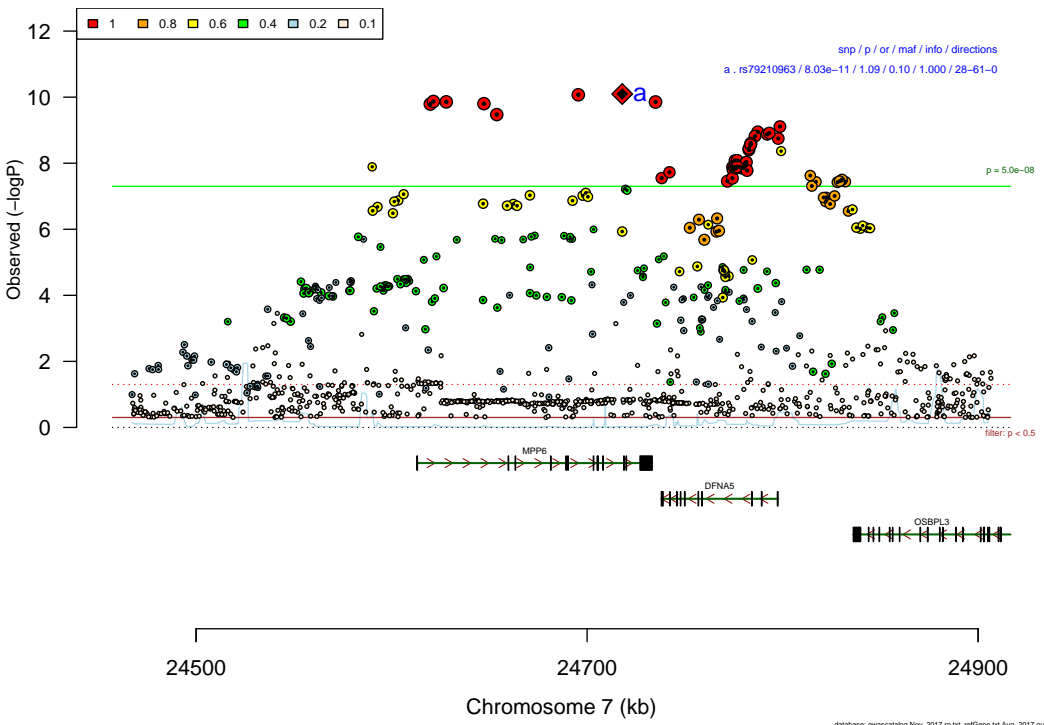

### SCZ\_cond\_rs79210963-chr7

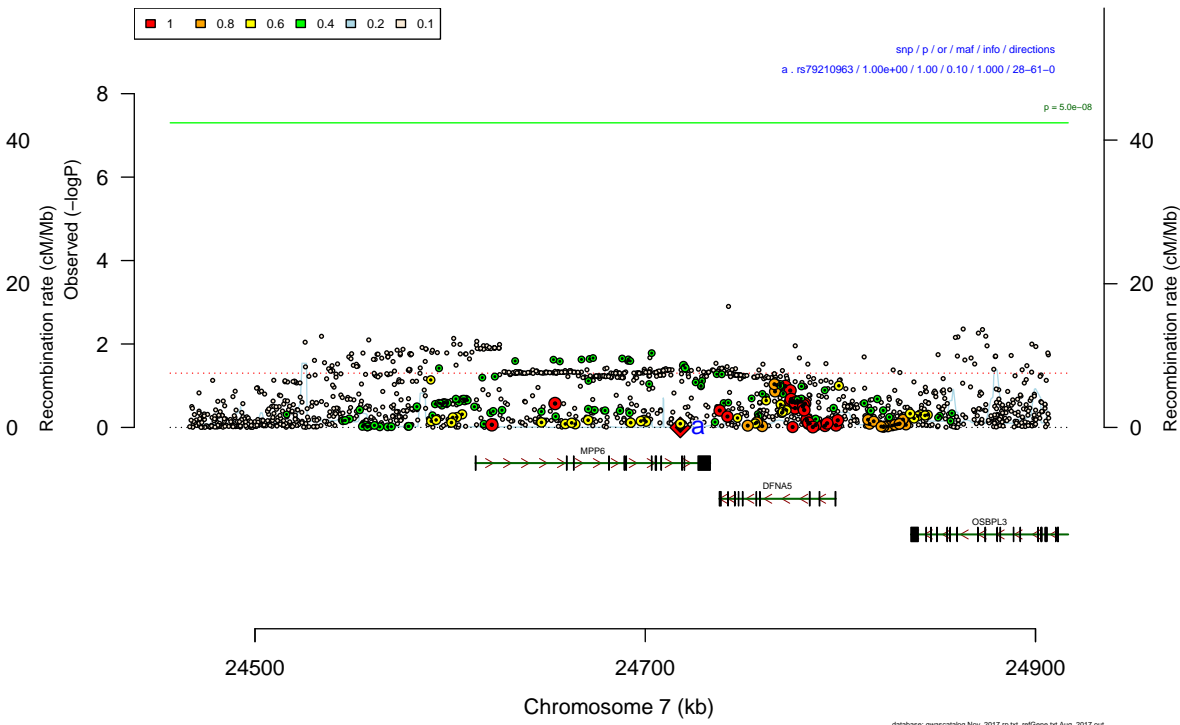

### SCZ\_uncond-rs77502336-chr11

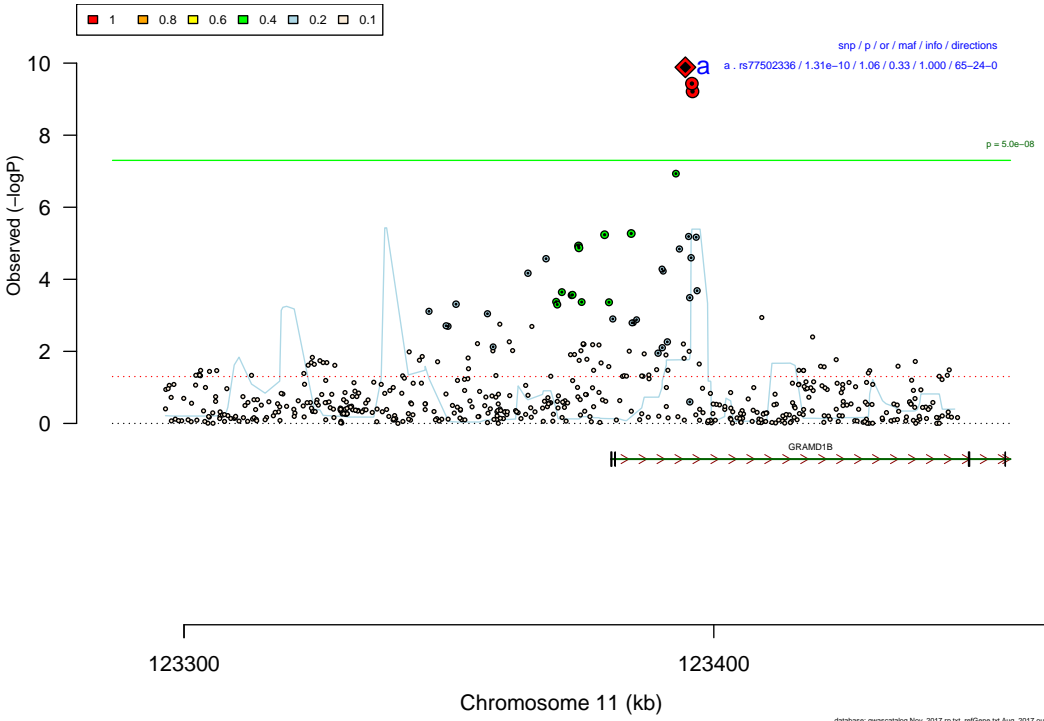

### SCZ\_cond\_rs77502336-chr11

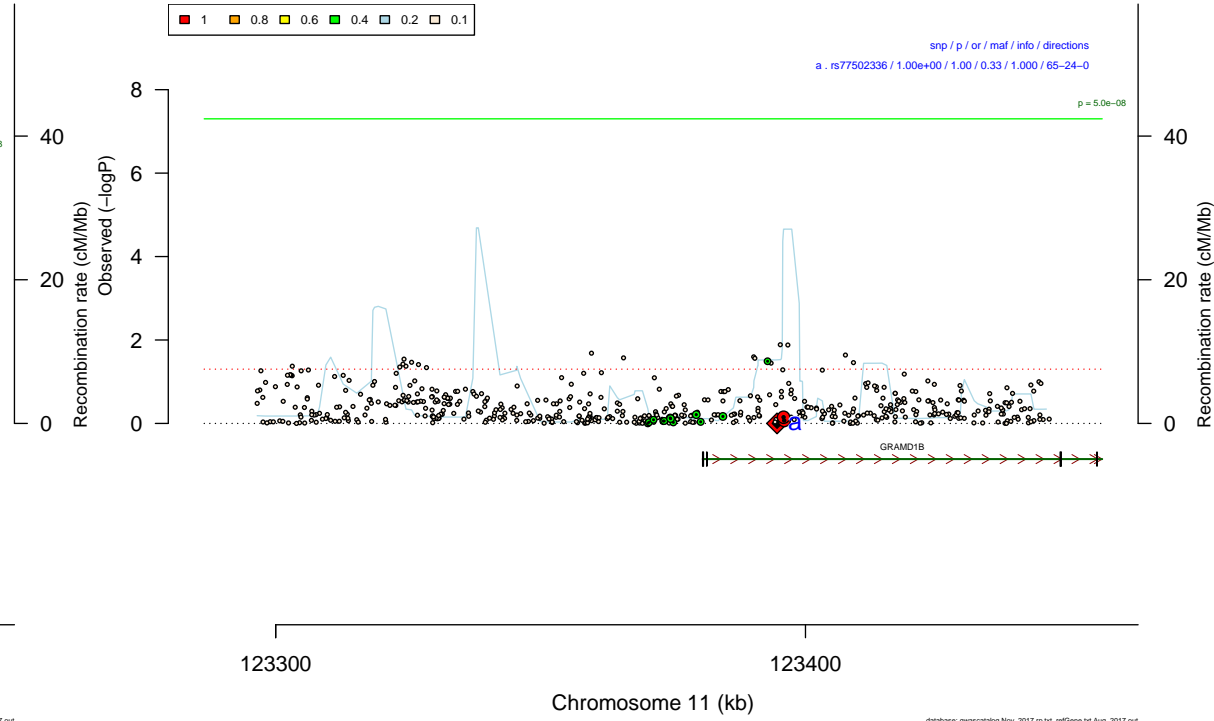

### SCZ\_uncond-rs17194490-chr3

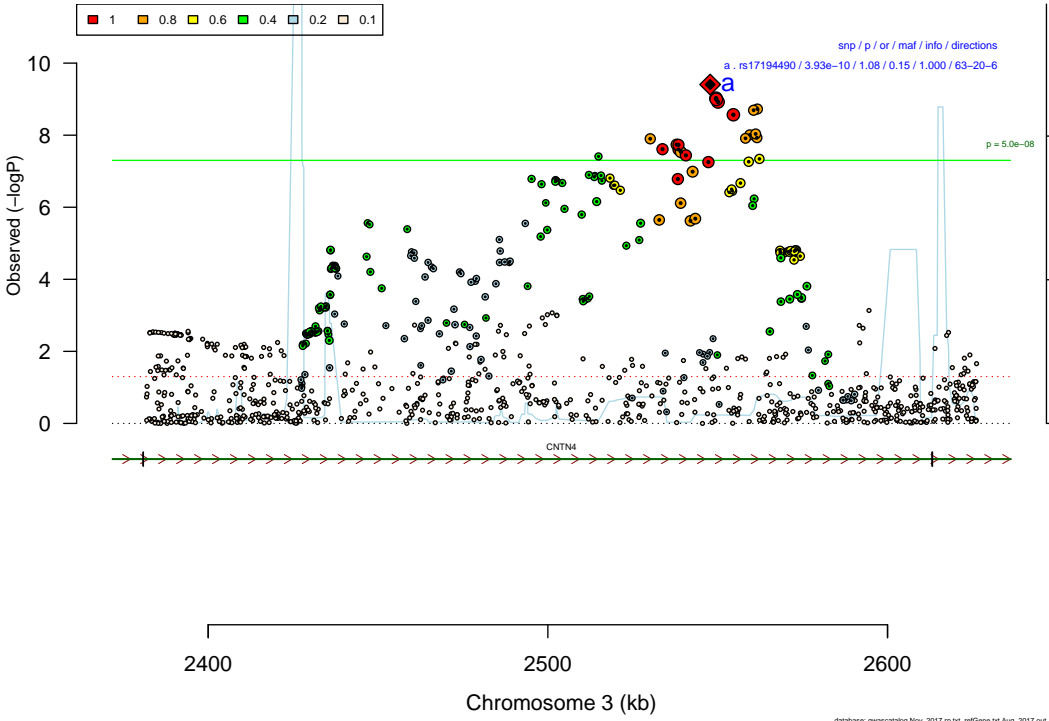

### SCZ\_cond\_rs17194490-chr3

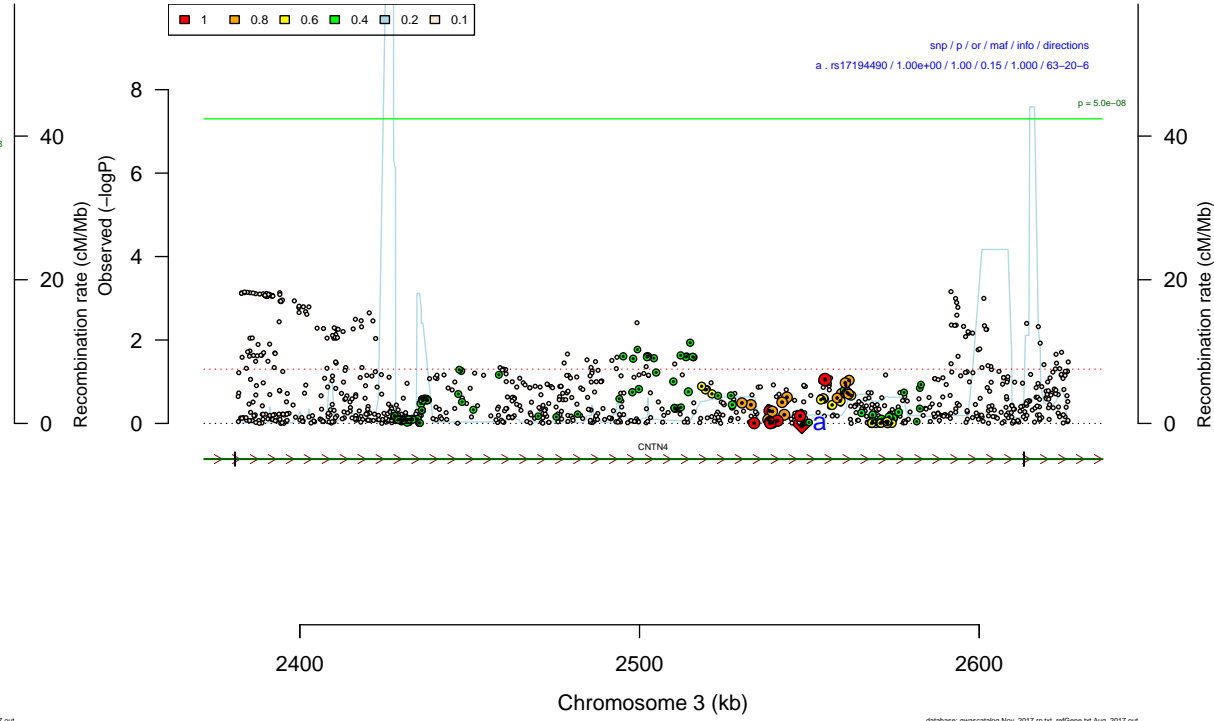

### SCZ\_uncond-rs61405217-chr4

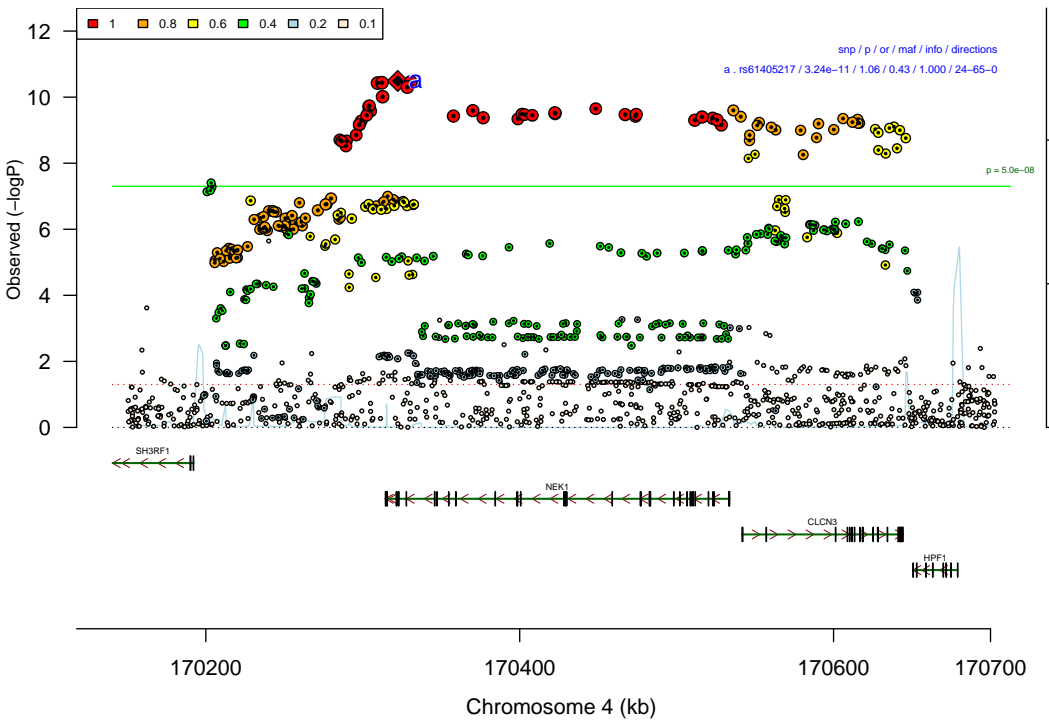

### SCZ\_cond\_rs61405217-chr4

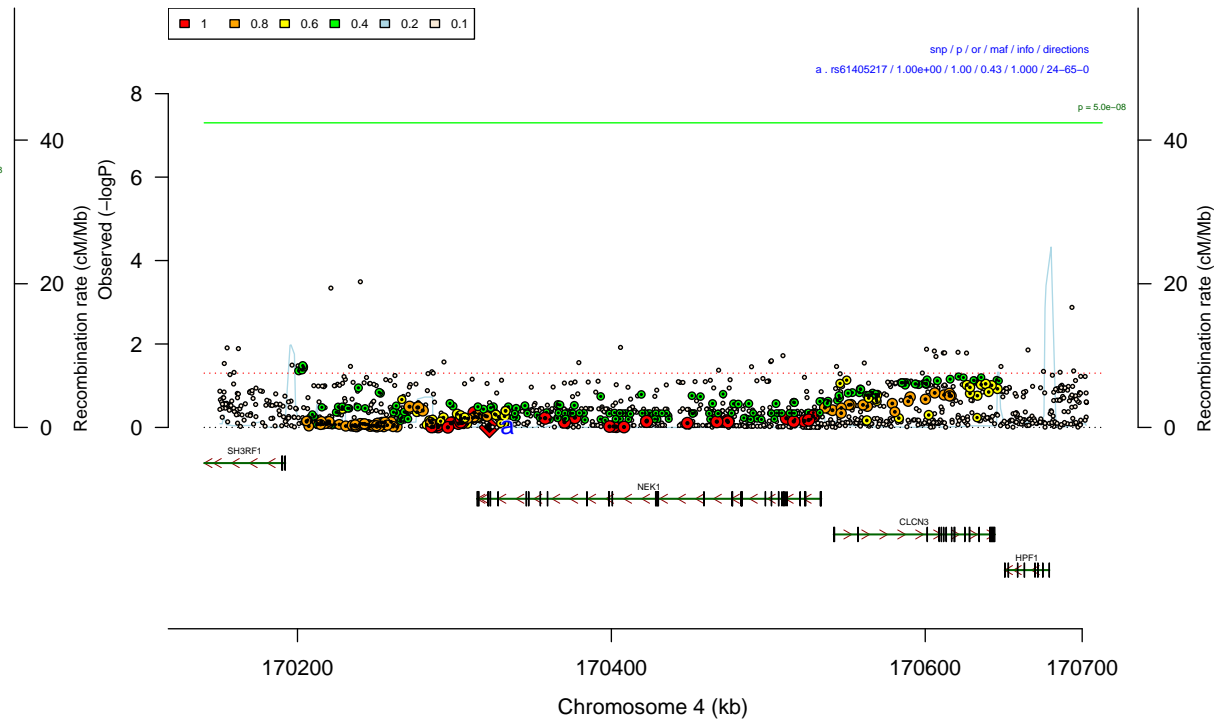

# SCZ\_uncond-rs9926049-chr16

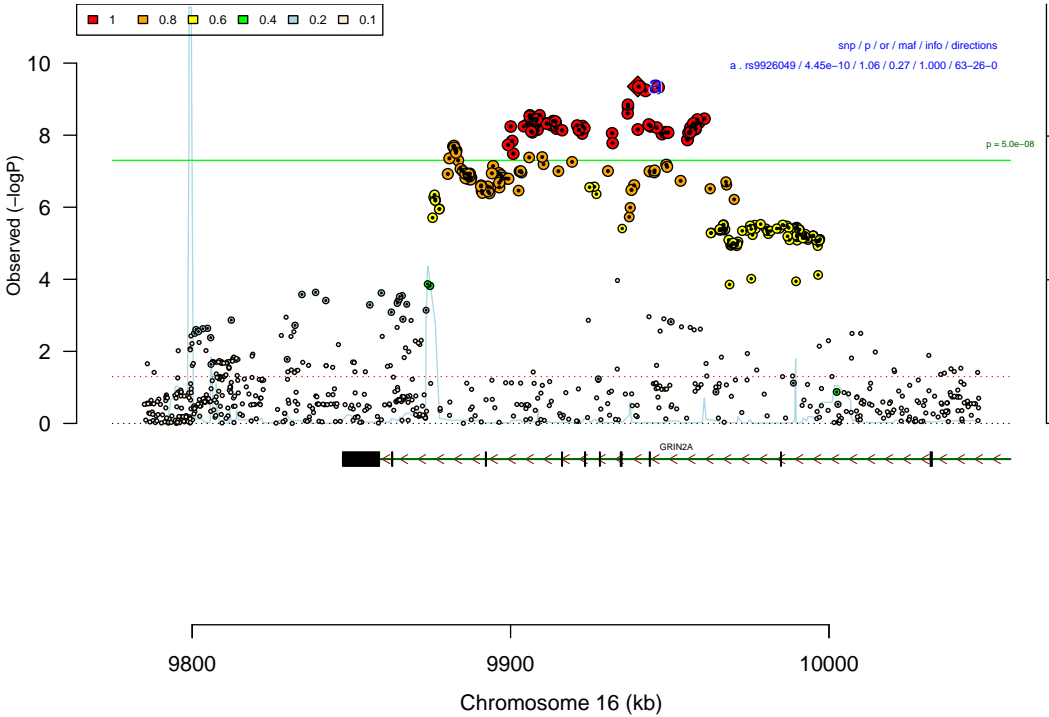

# SCZ\_cond\_rs9926049-chr16

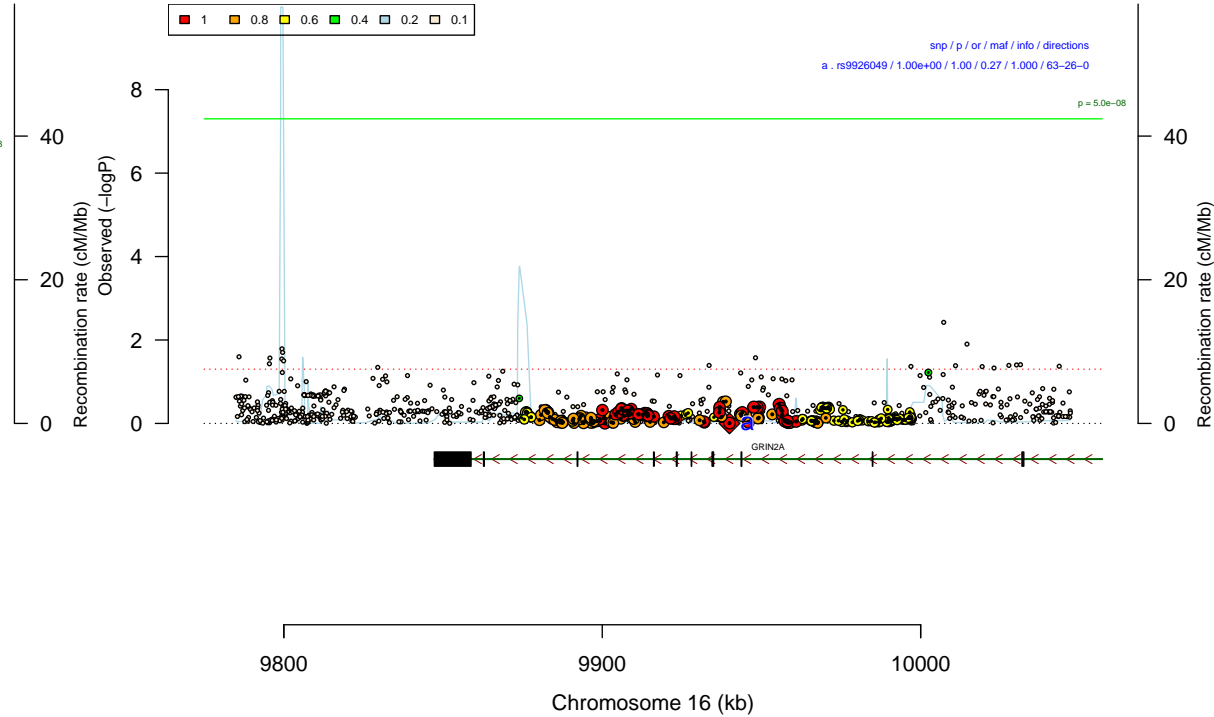

### SCZ\_uncond-rs2929278-chr15

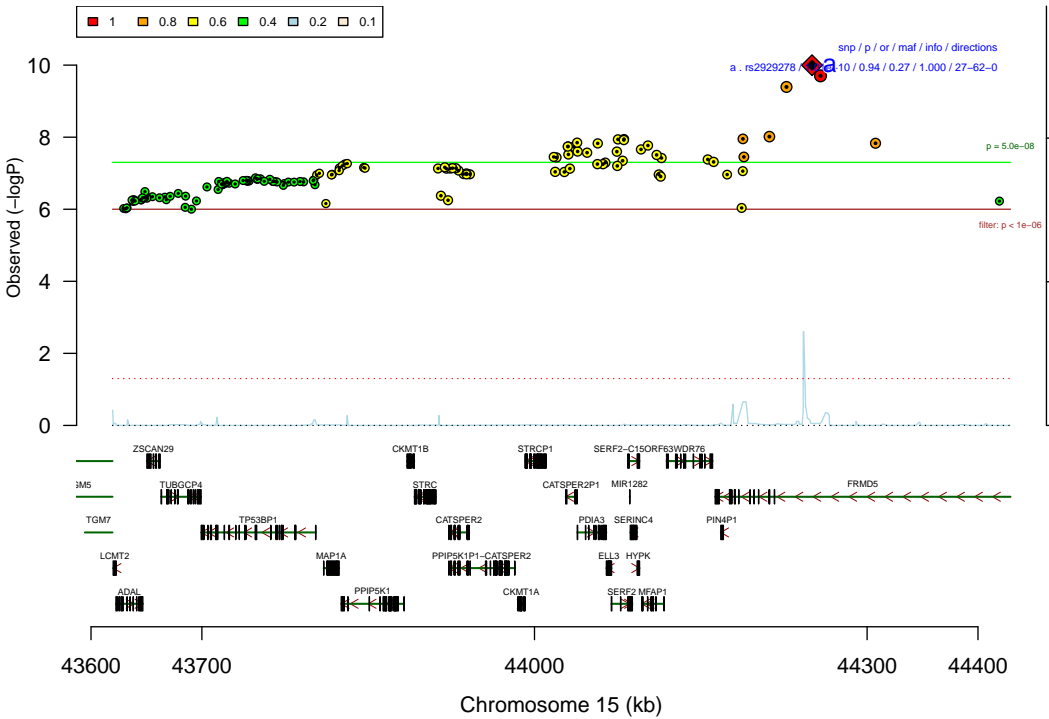

### SCZ\_cond\_rs2929278-chr15

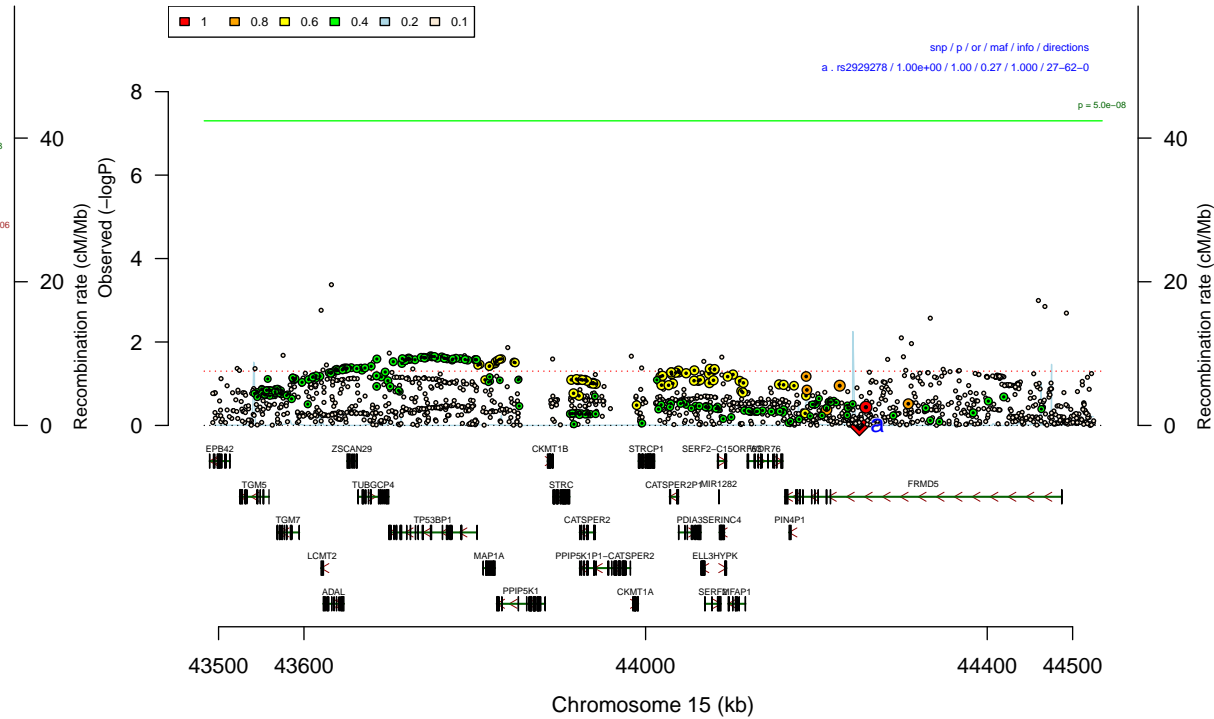

SCZ\_uncond-8:4180090\_T\_A-chr8

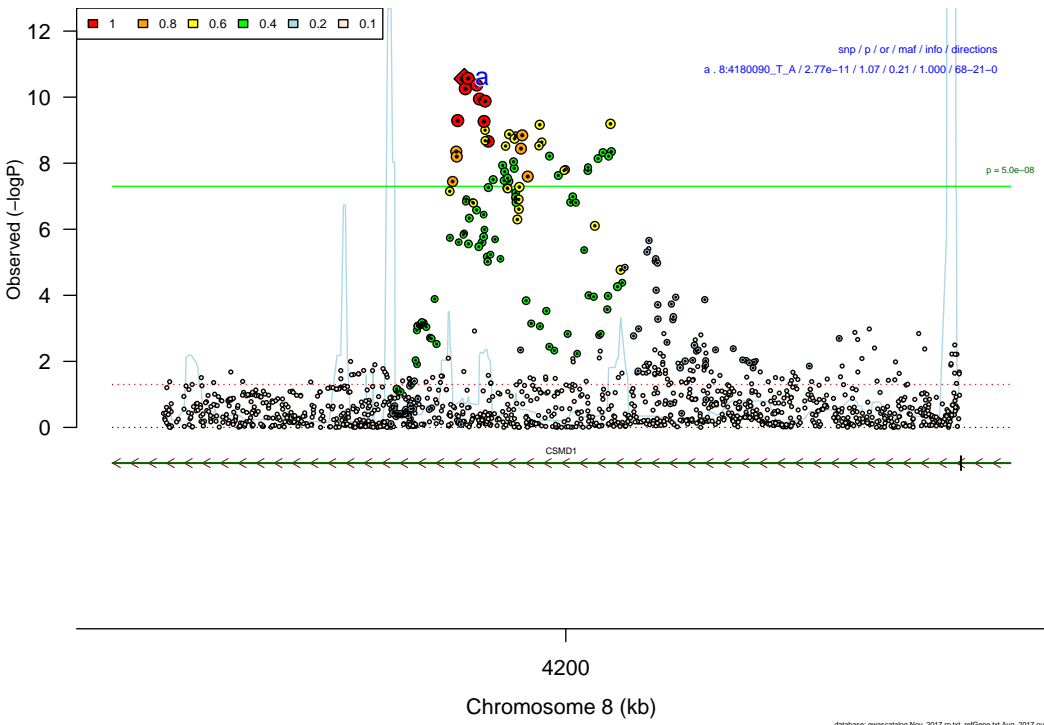

SCZ\_cond\_8:4180090\_T\_A-chr8

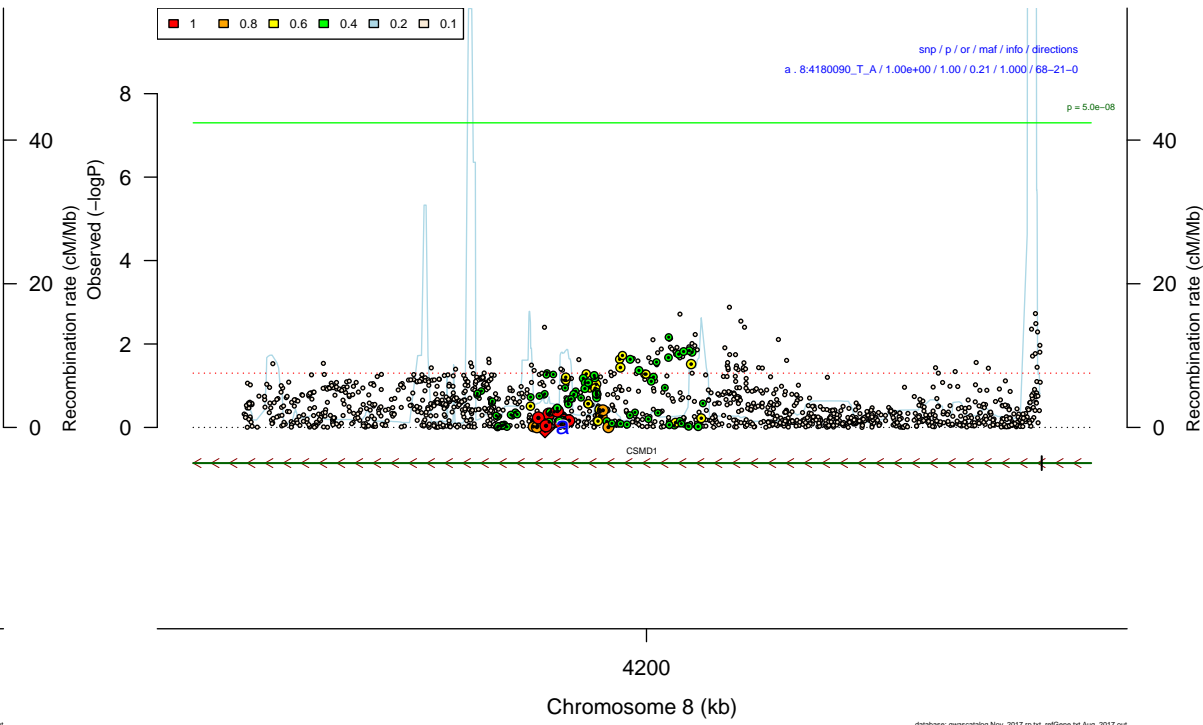



### SCZ\_uncond-rs1915019-chr8

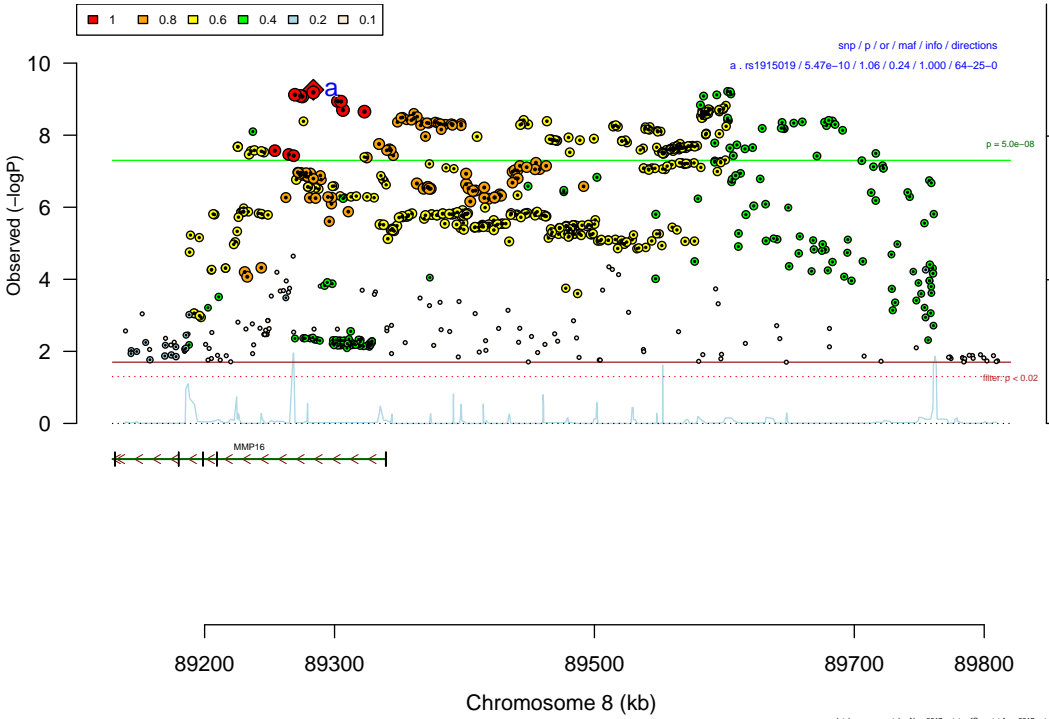

### SCZ\_cond\_rs1915019-chr8

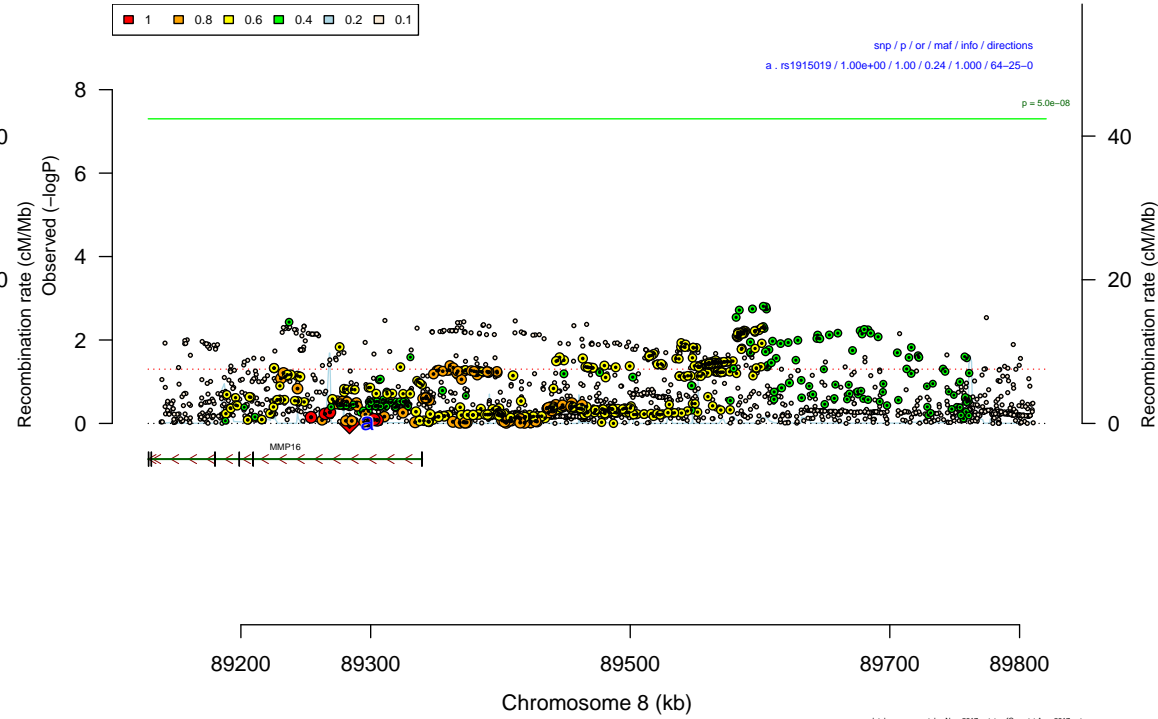

### SCZ\_uncond-rs10117-chr5

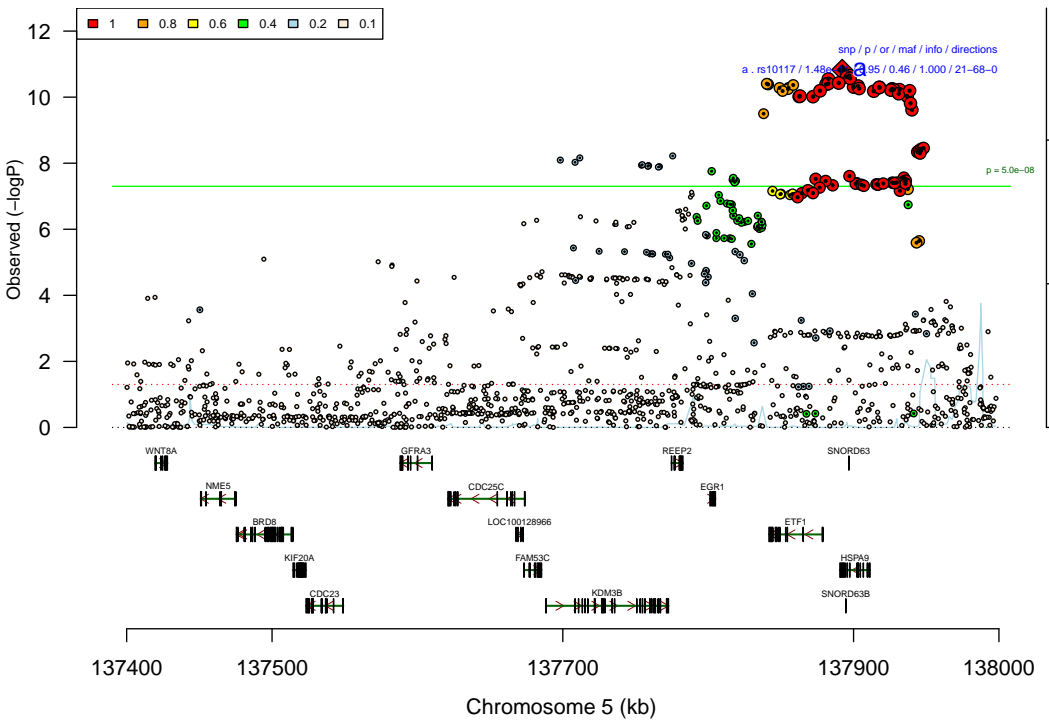

### SCZ\_cond\_rs10117-chr5

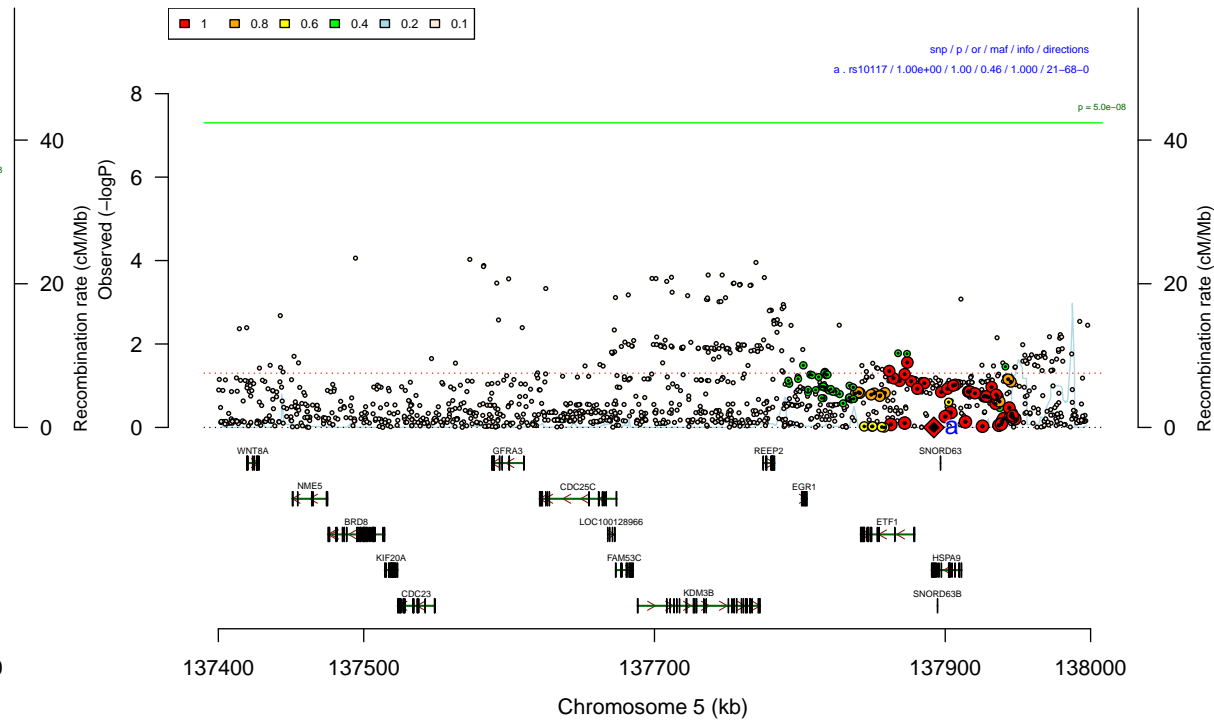

### SCZ\_uncond-rs28490262-chr3

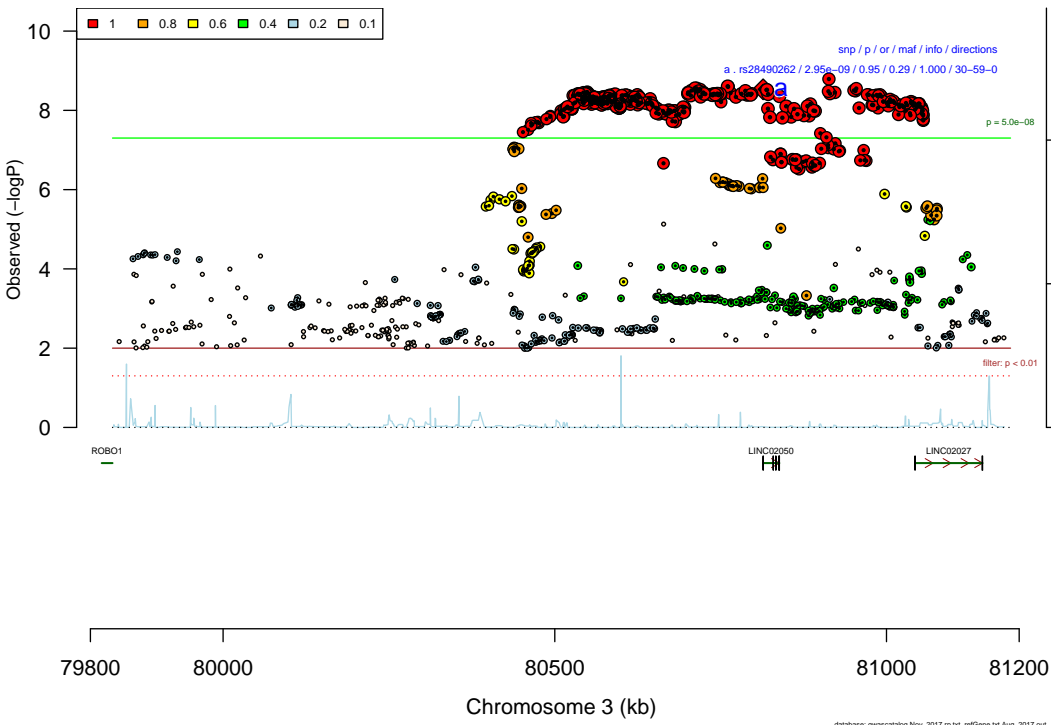

### SCZ\_cond\_rs28490262-chr3

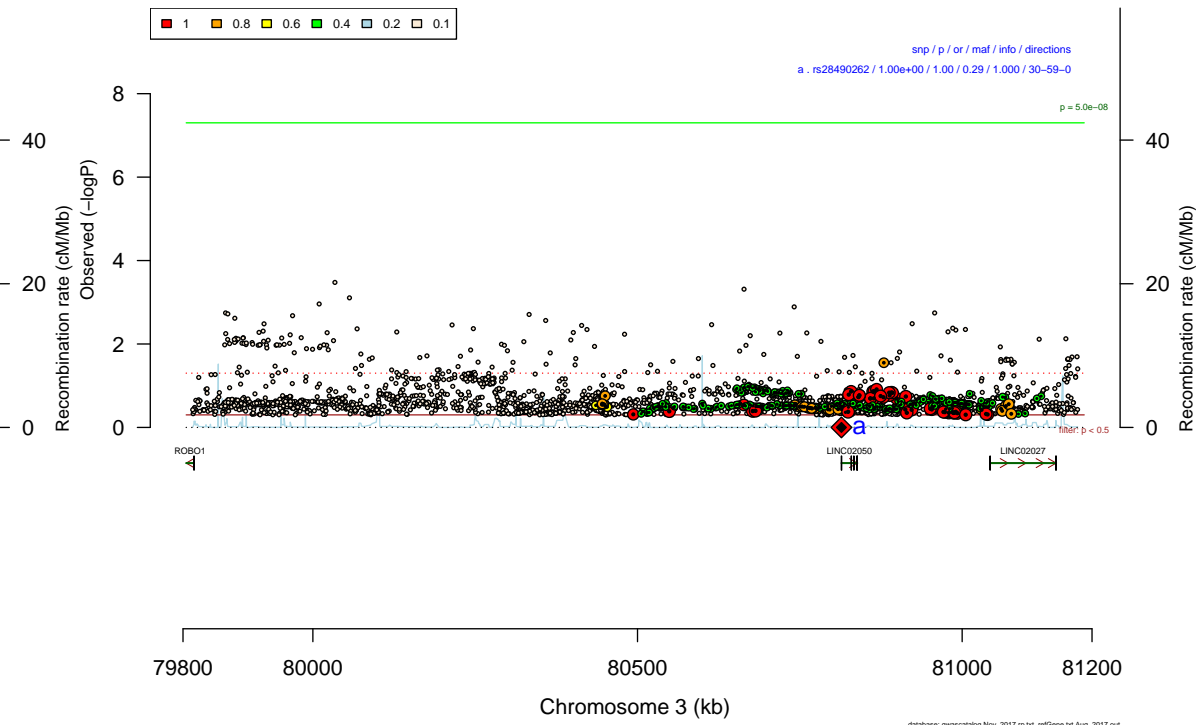

### SCZ\_uncond-rs56205728-chr15

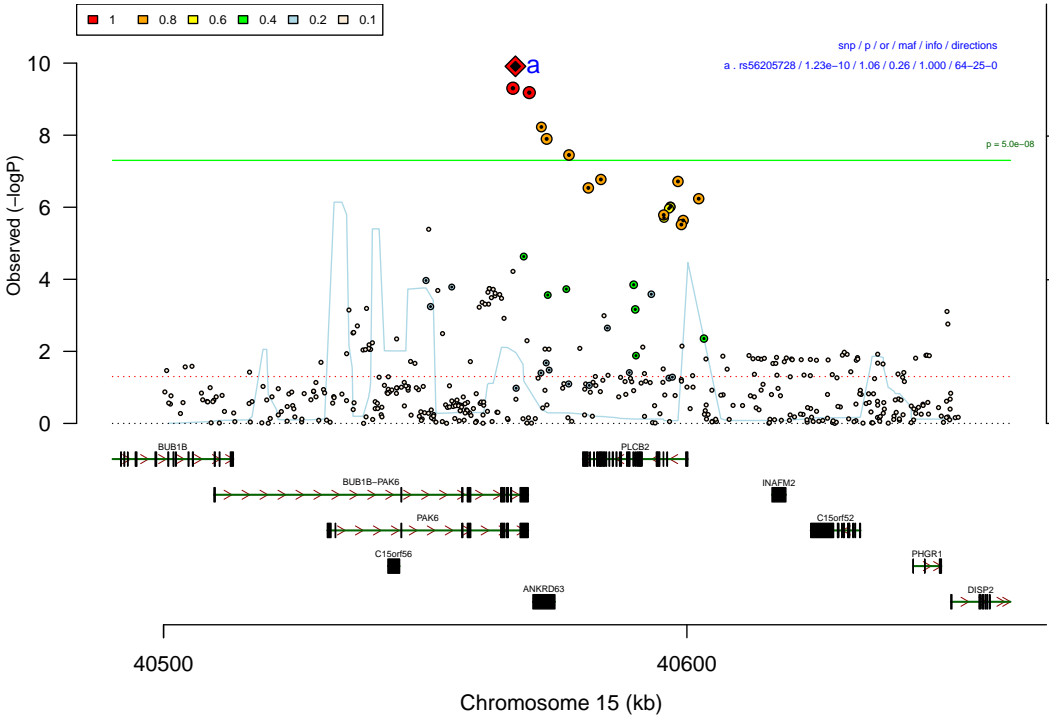

### SCZ\_cond\_rs56205728-chr15

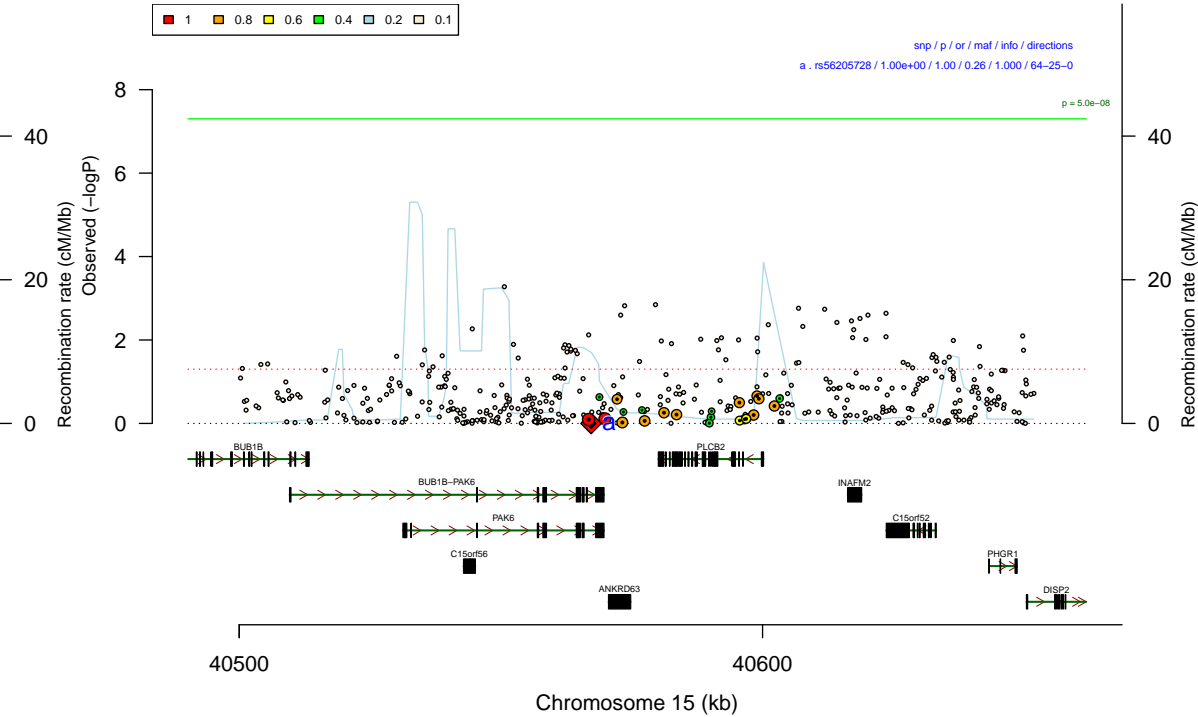

### SCZ\_uncond-rs10957321-chr8

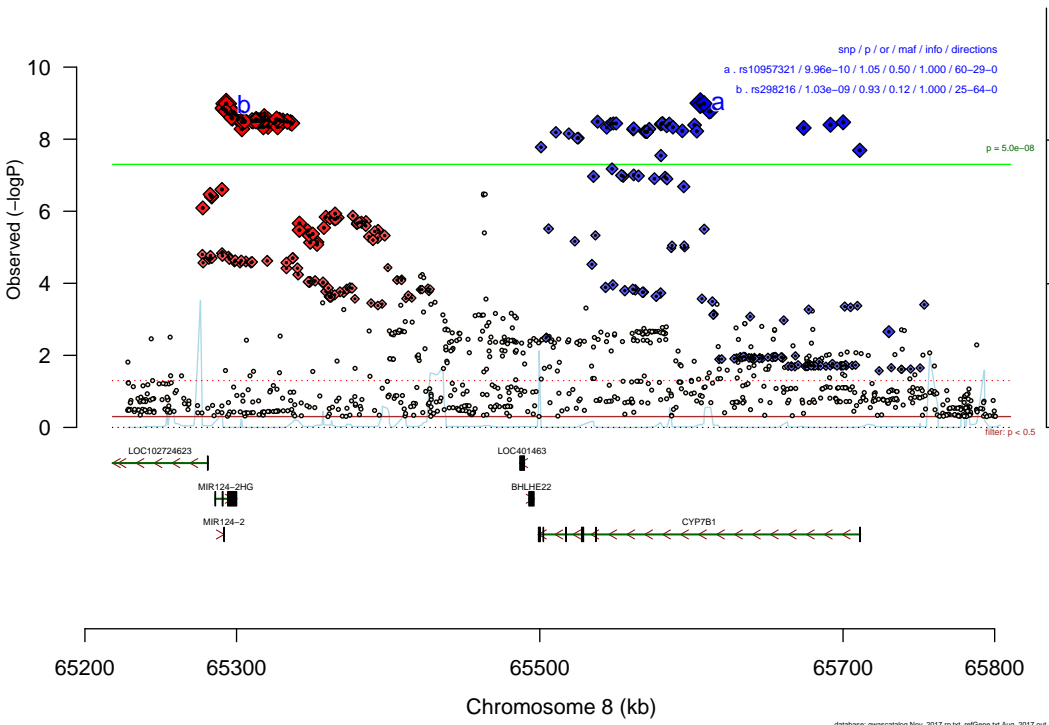

### SCZ\_cond\_rs10957321-chr8

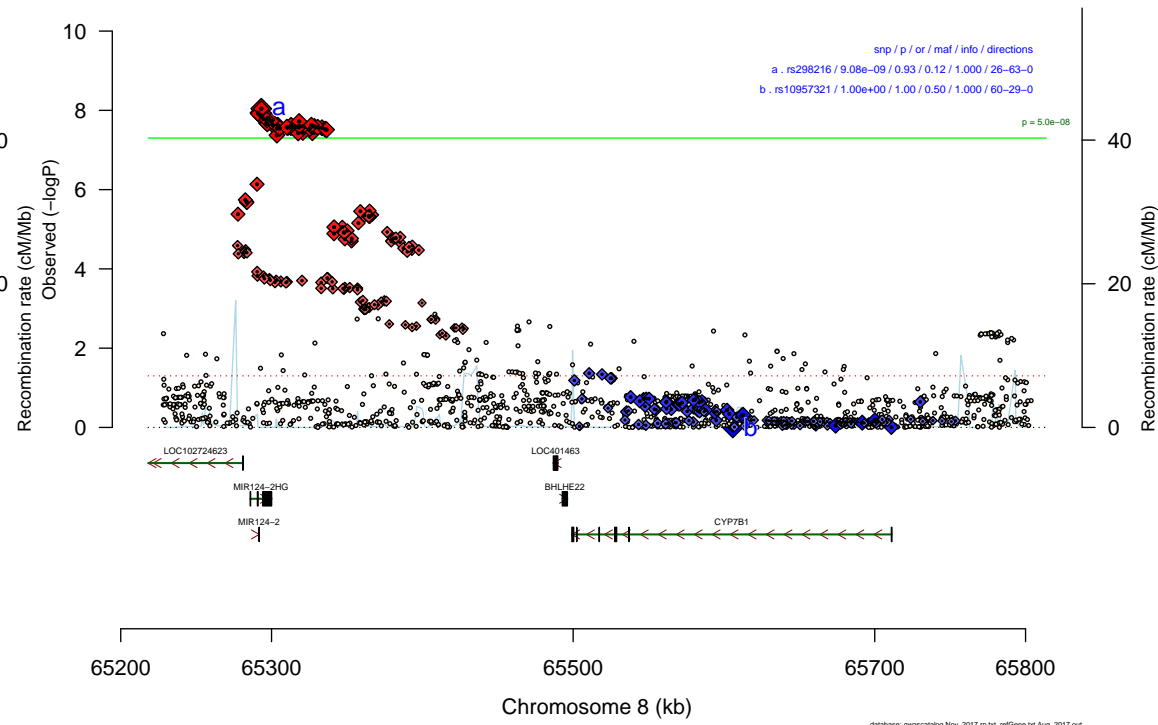

### SCZ\_cond\_rs10957321-rs298216-chr8

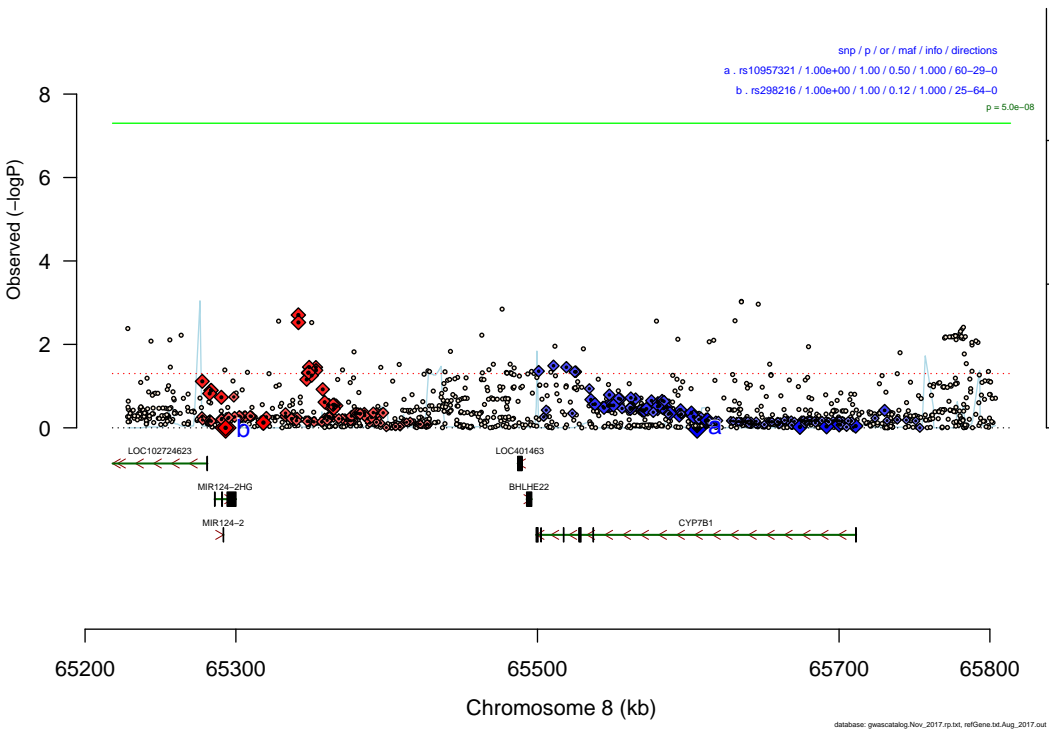

### SCZ\_uncond-rs75968099-chr3

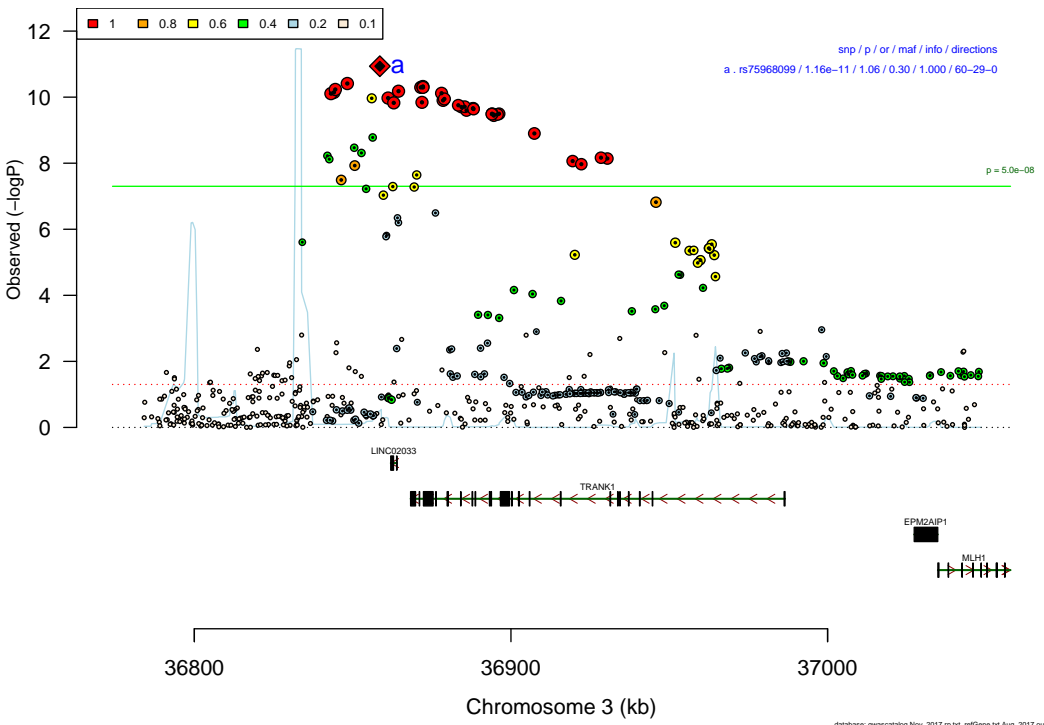

### SCZ\_cond\_rs75968099-chr3

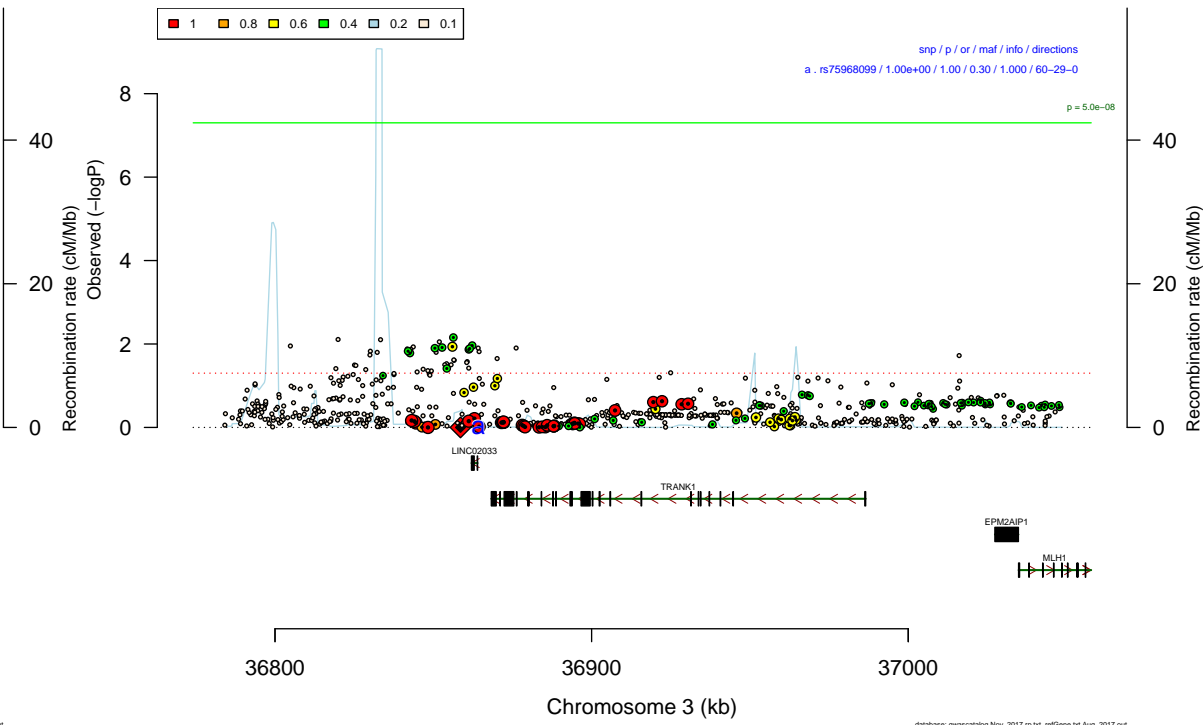

### SCZ\_uncond-rs11619756-chr13

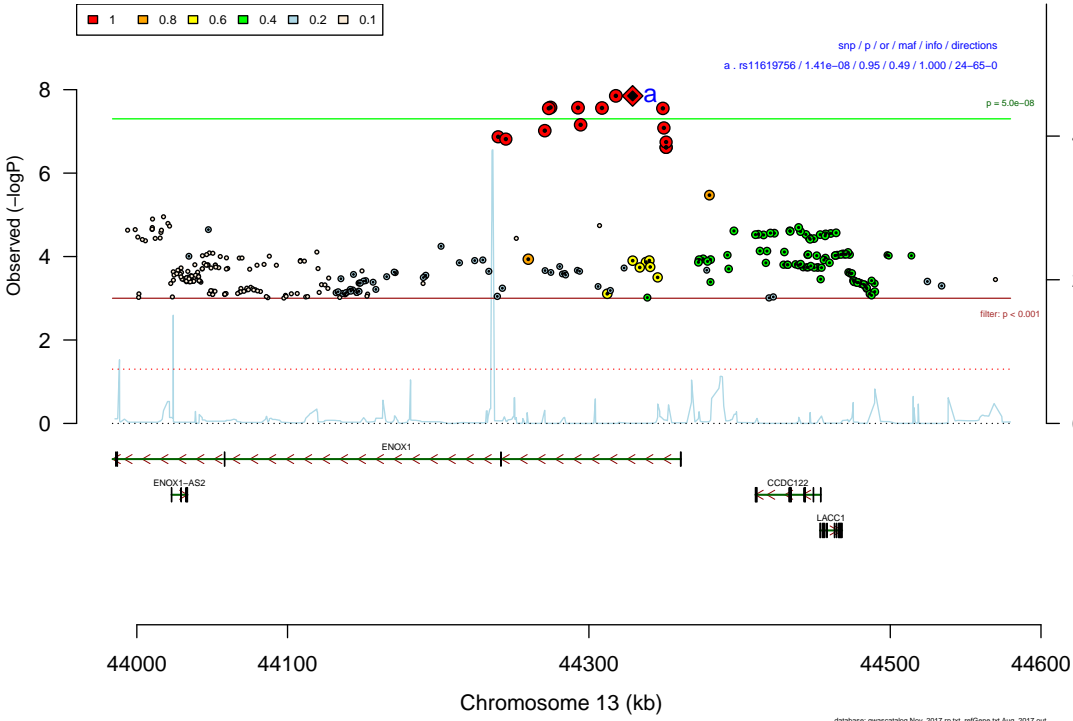

### SCZ\_cond\_rs11619756-chr13

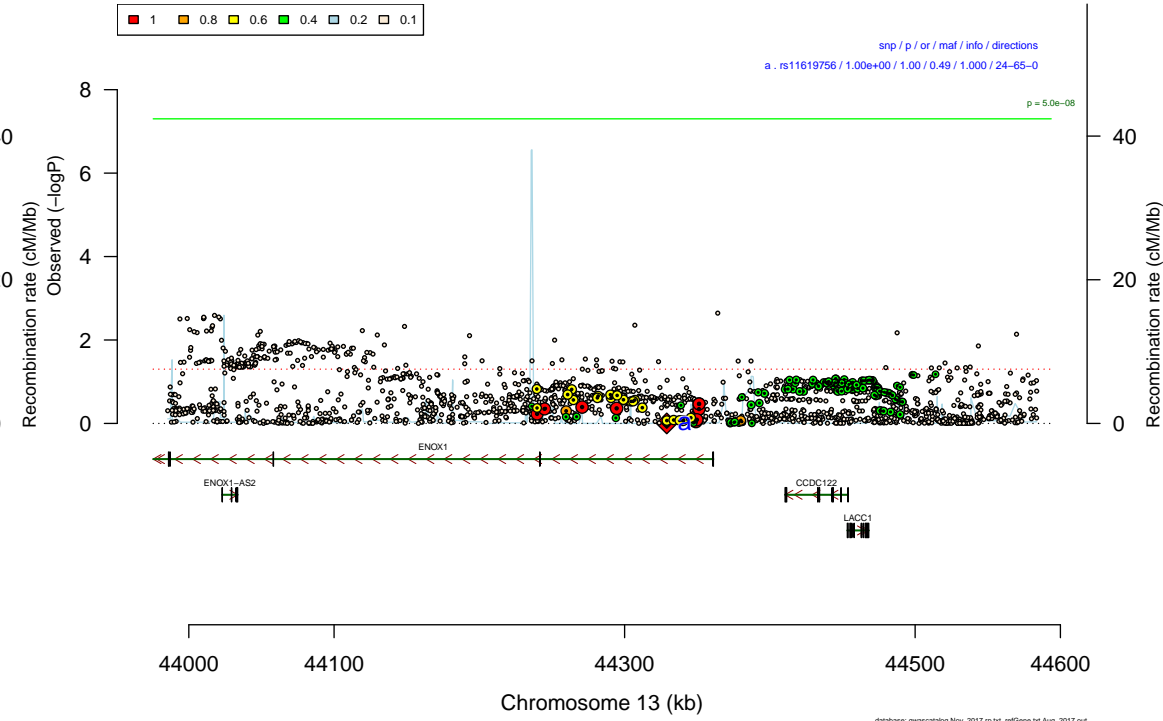

### SCZ\_uncond-rs1593304-chr7

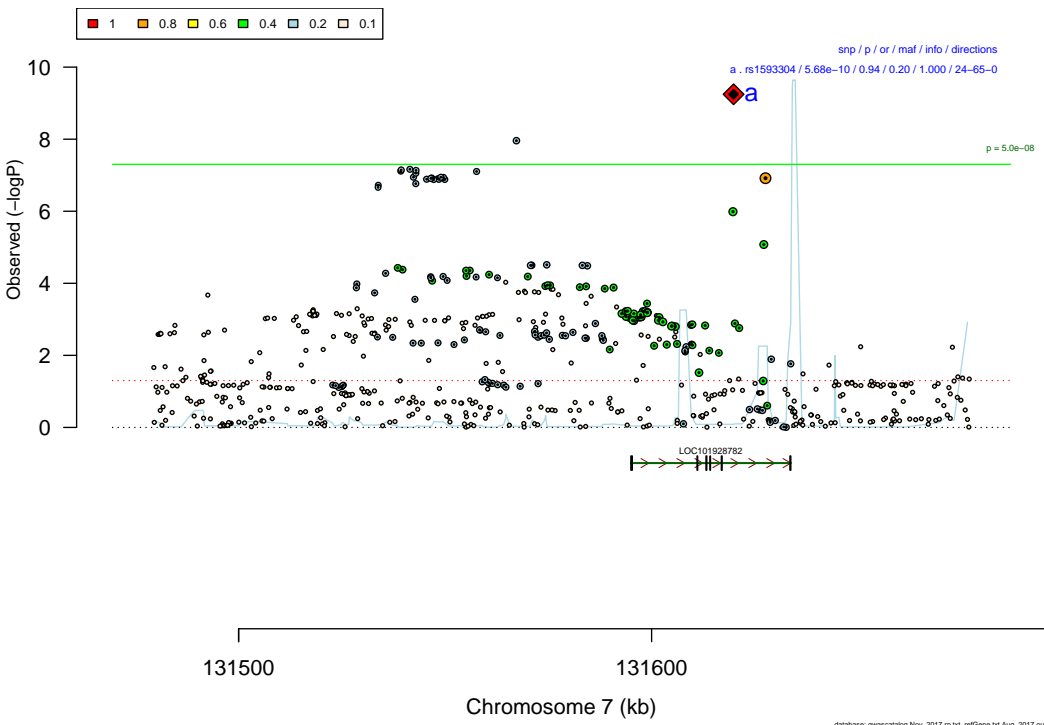

### SCZ\_cond\_rs1593304-chr7

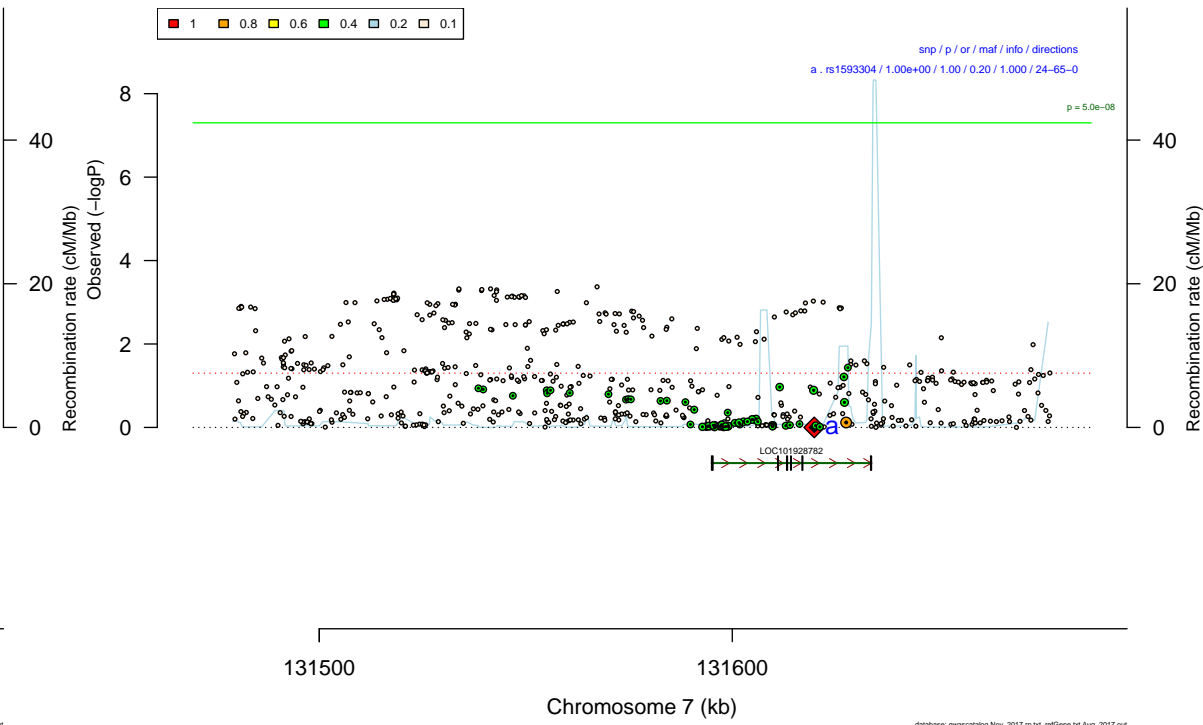



### SCZ\_uncond-rs2532240-chr17

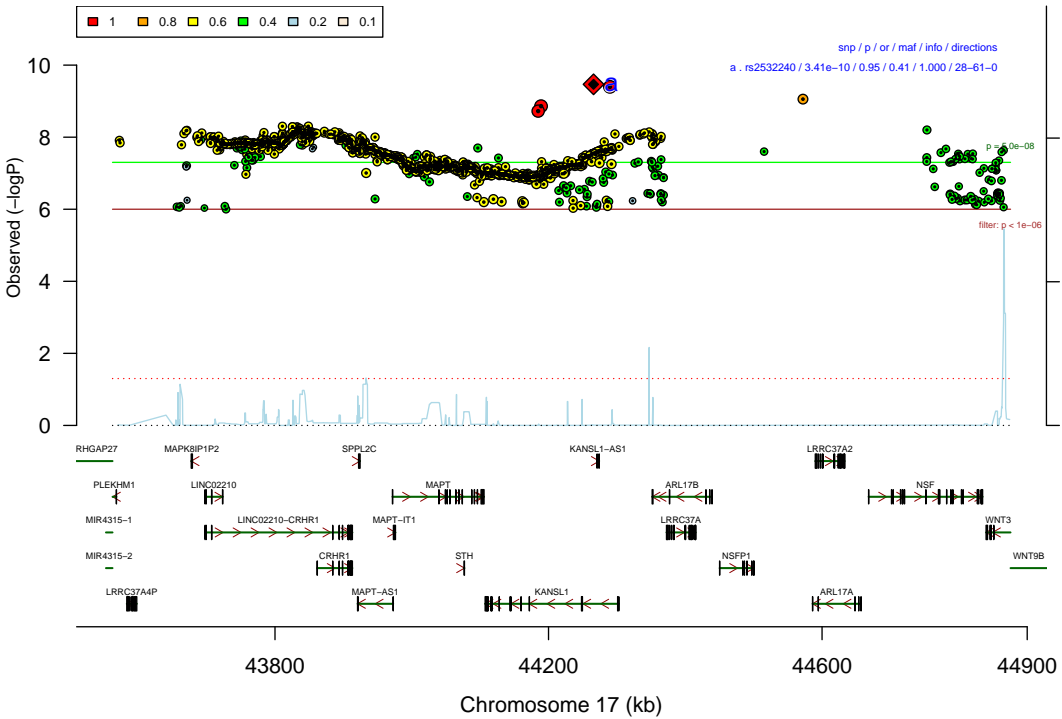

### SCZ\_cond\_rs2532240-chr17

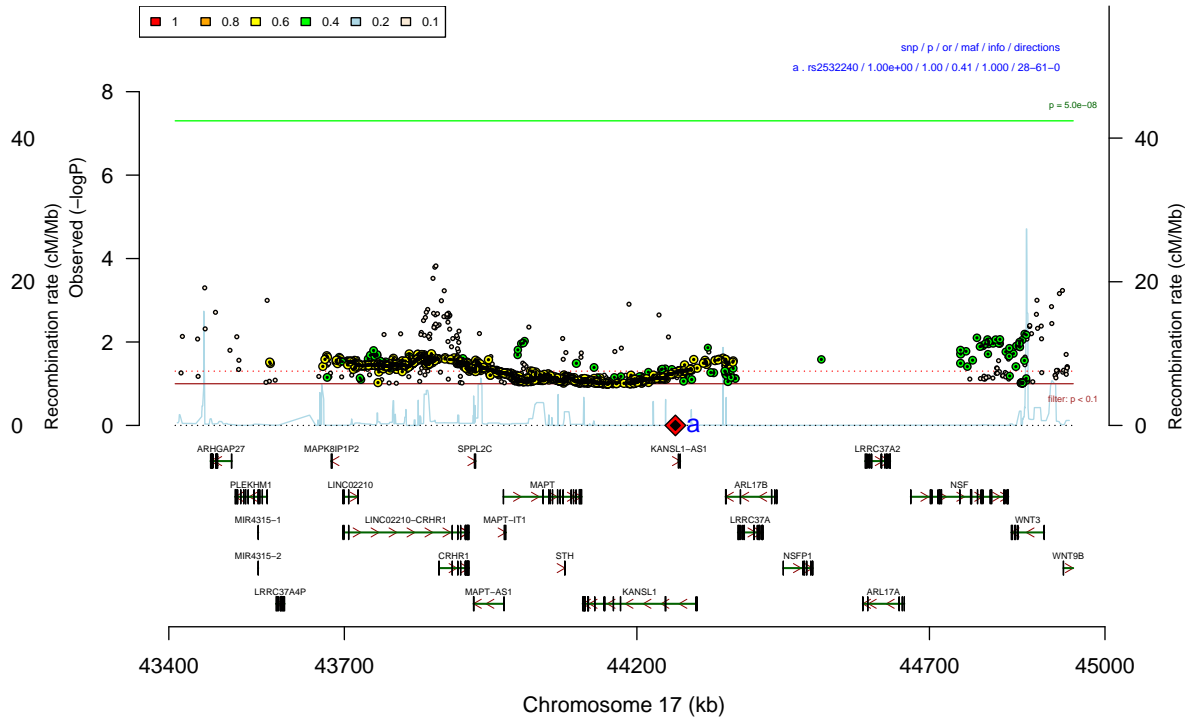

### SCZ\_uncond-rs13090130-chr3

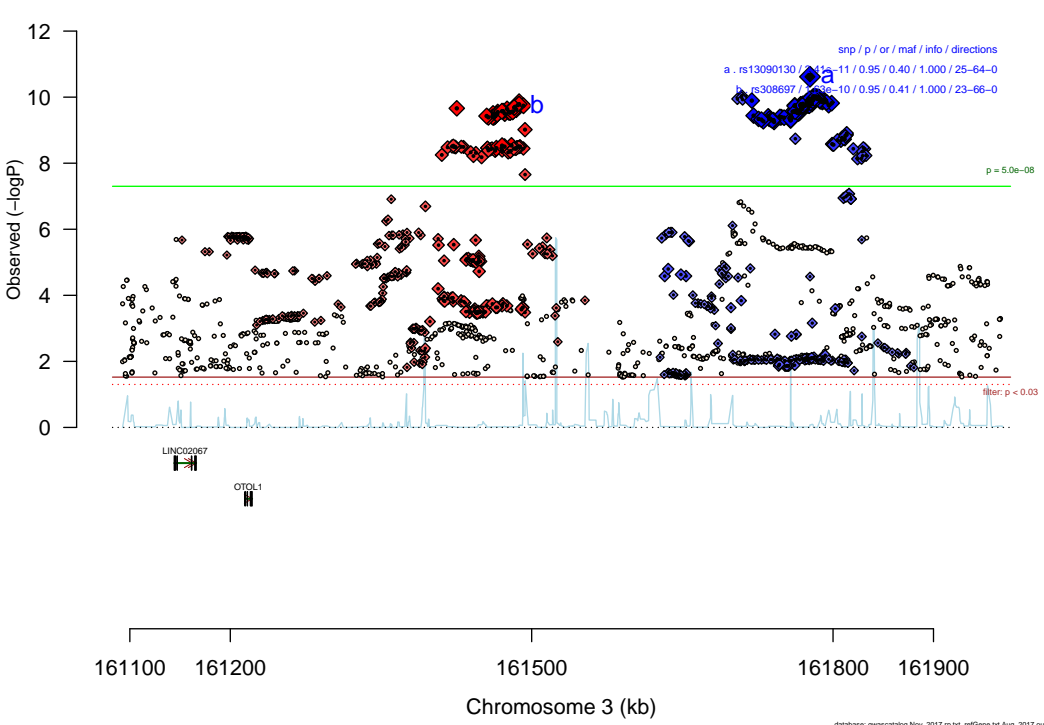

### SCZ\_cond\_rs13090130-chr3

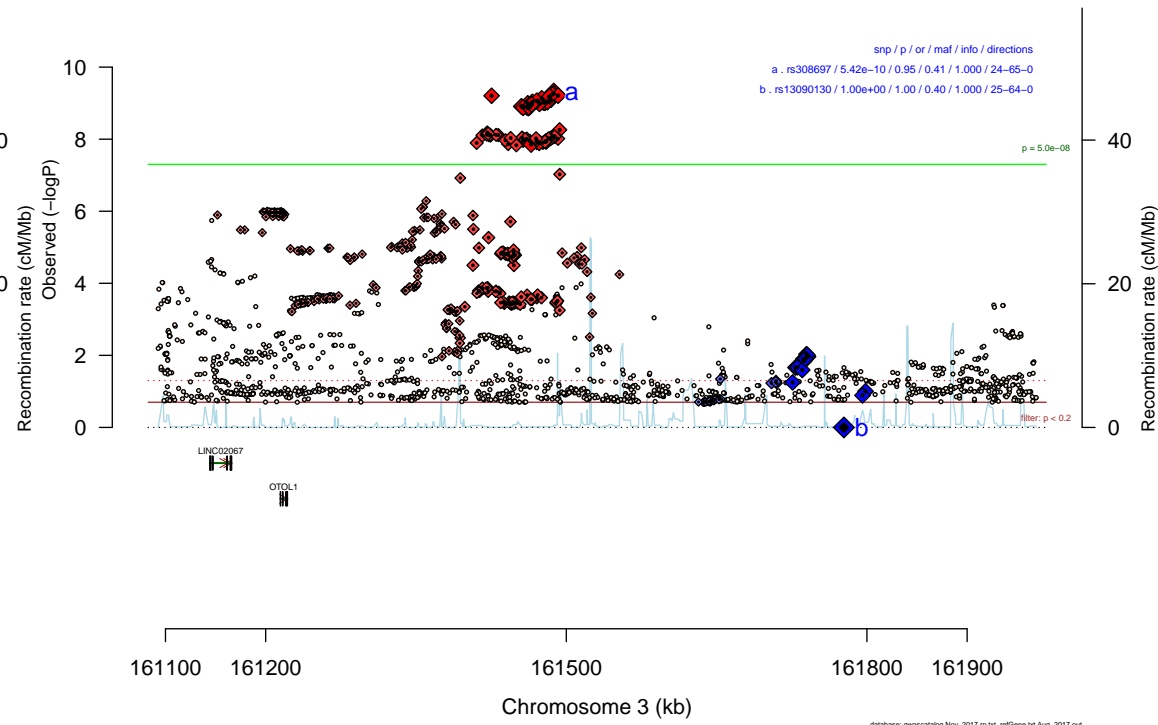

### SCZ\_cond\_rs13090130-rs308697-chr3

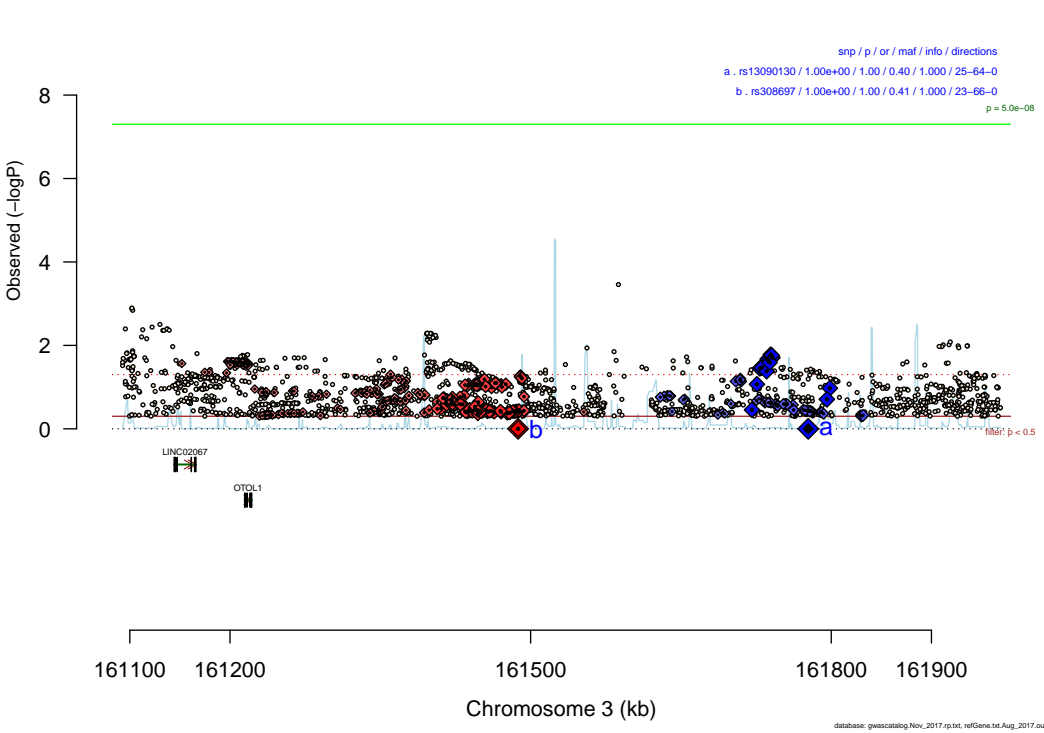

### SCZ\_uncond-rs12363019-chr11

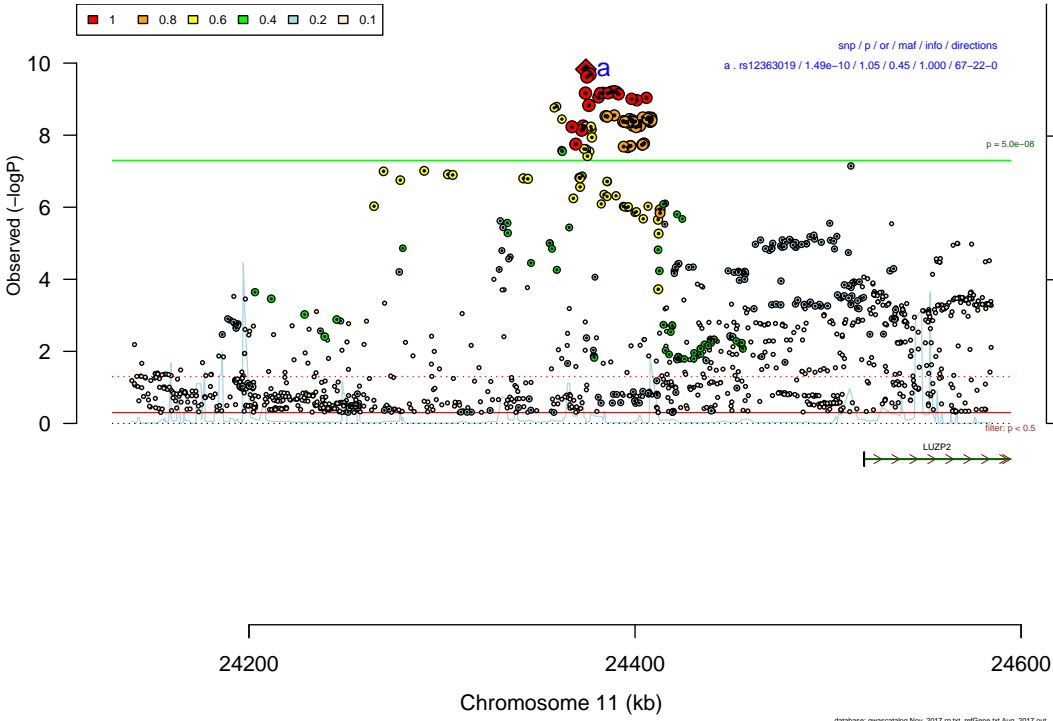

### SCZ\_cond\_rs12363019-chr11

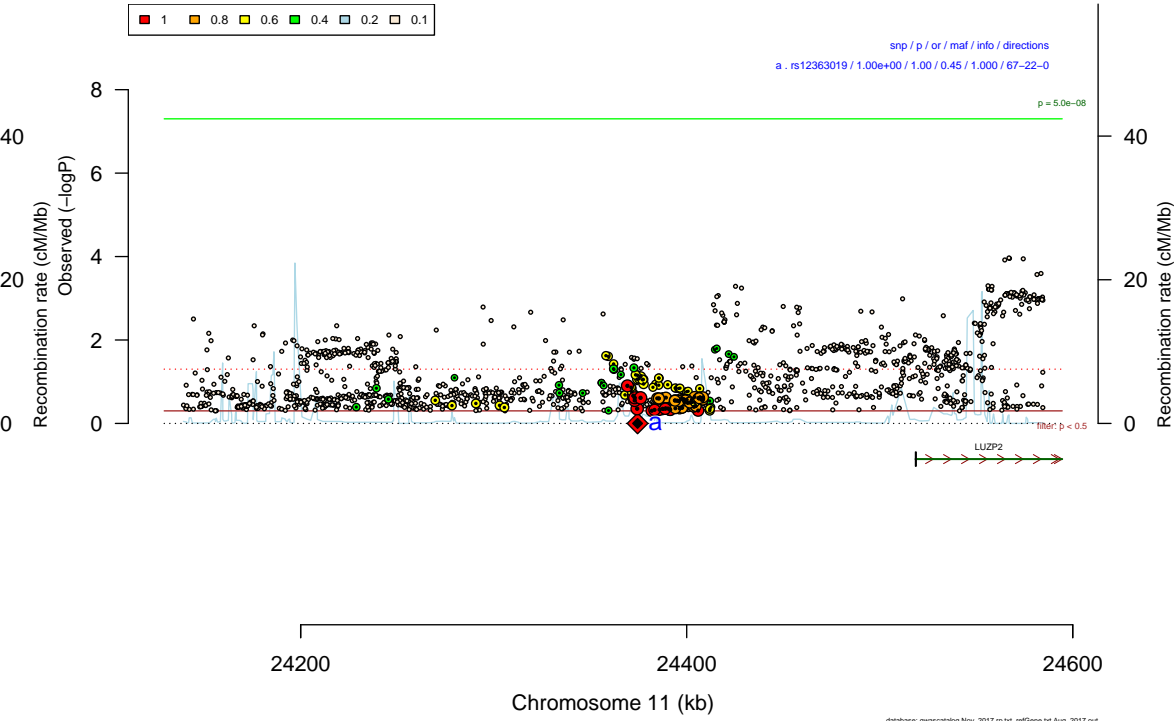

### SCZ\_uncond-rs7312697-chr12

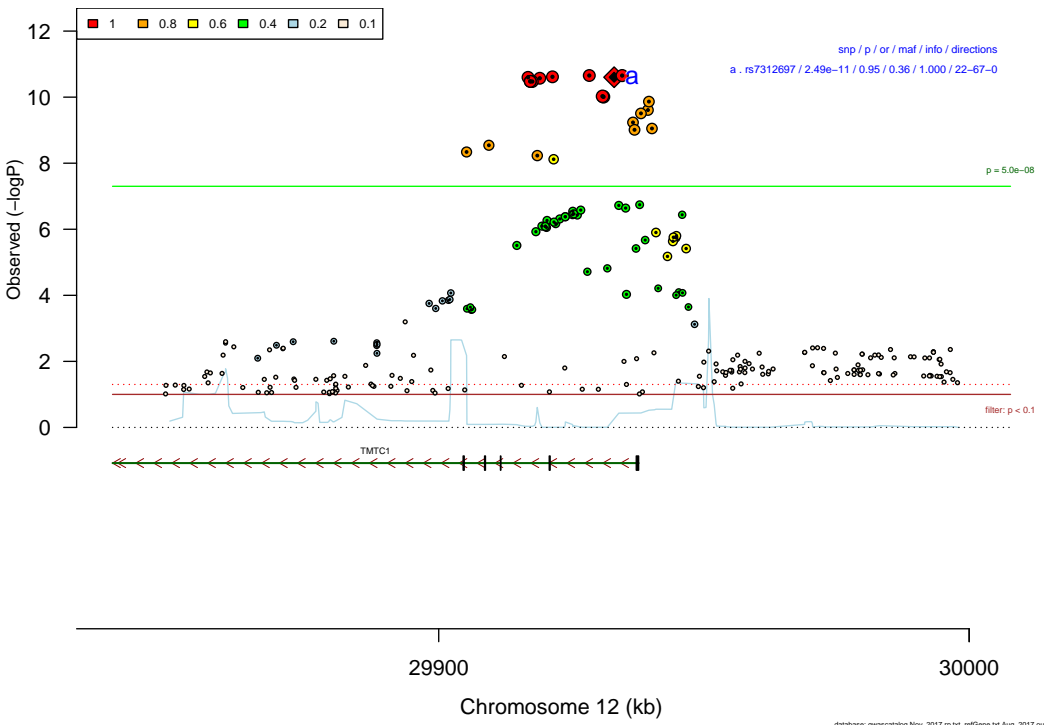

### SCZ\_cond\_rs7312697-chr12

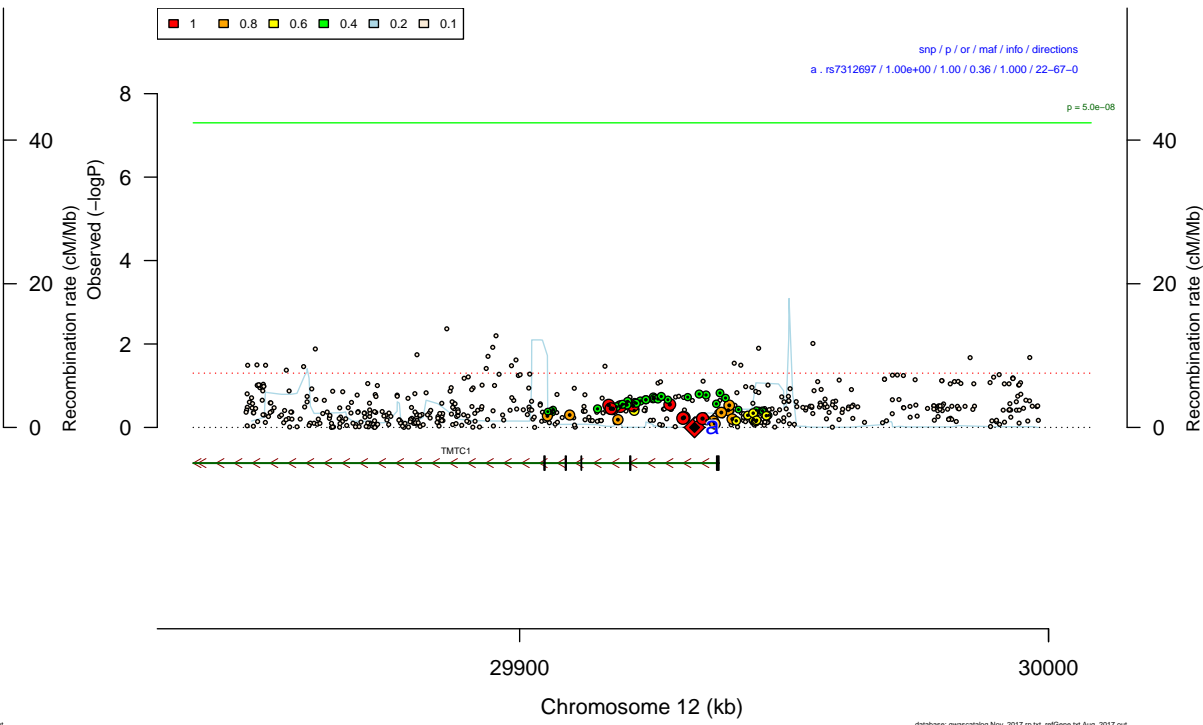

### SCZ\_uncond-rs72728416-chr1

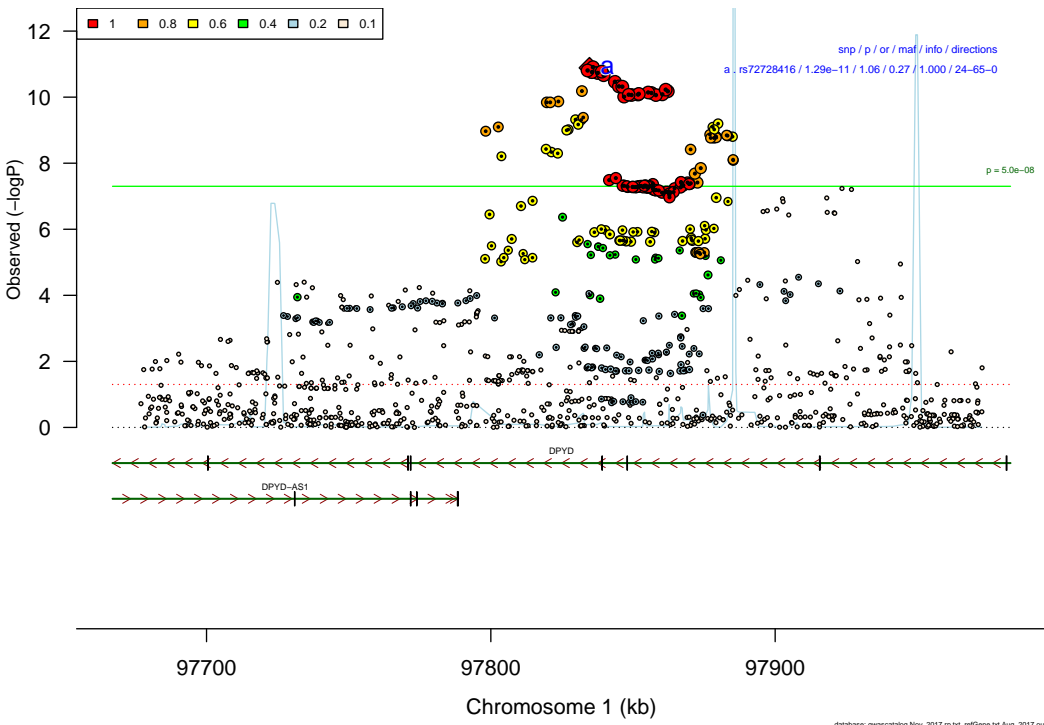

### SCZ\_cond\_rs72728416-chr1

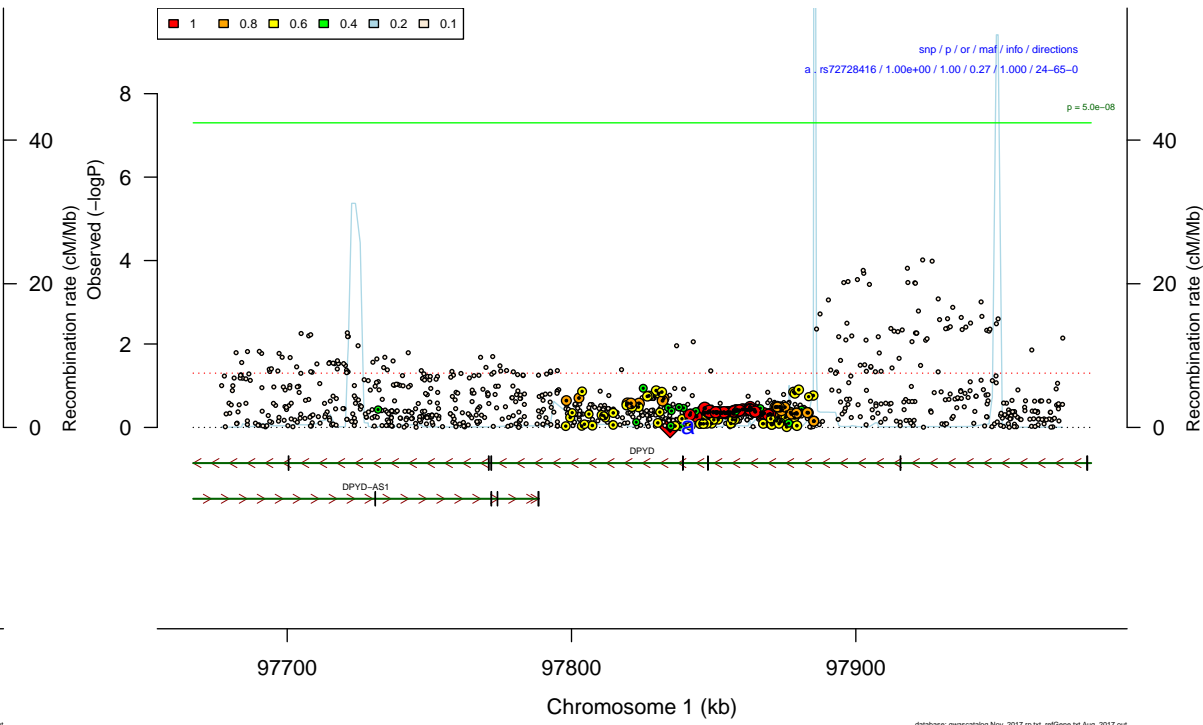

### SCZ\_uncond-rs12943566-chr17

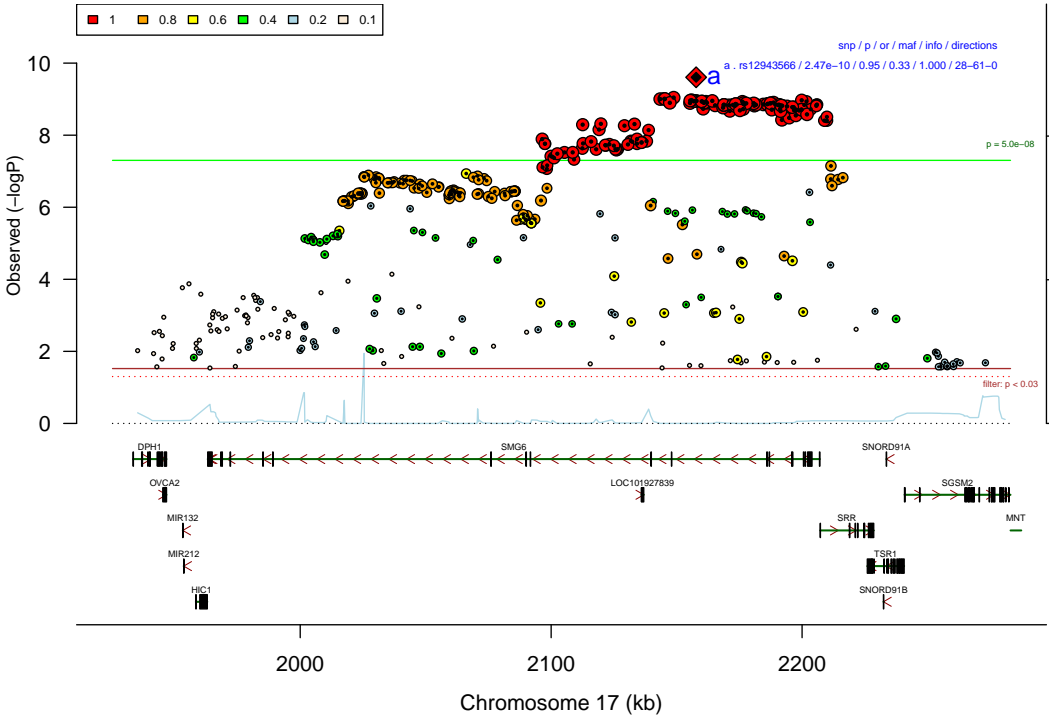

### SCZ\_cond\_rs12943566-chr17

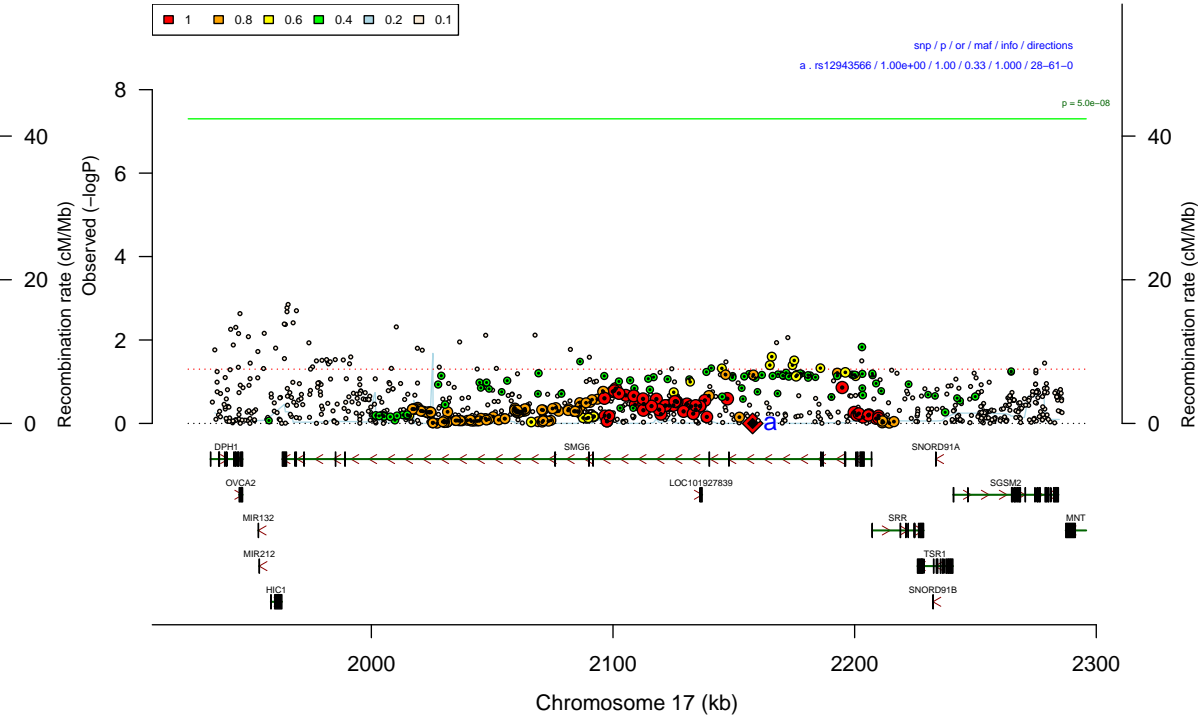

### SCZ\_uncond-rs10767734-chr11

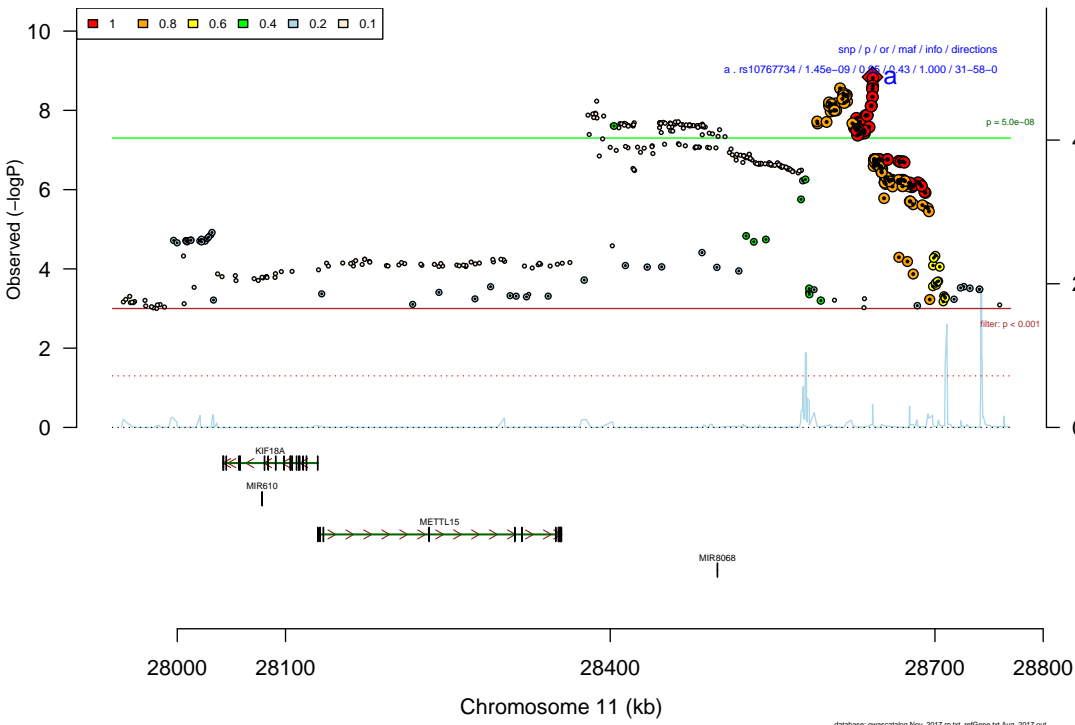

### SCZ\_cond\_rs10767734-chr11

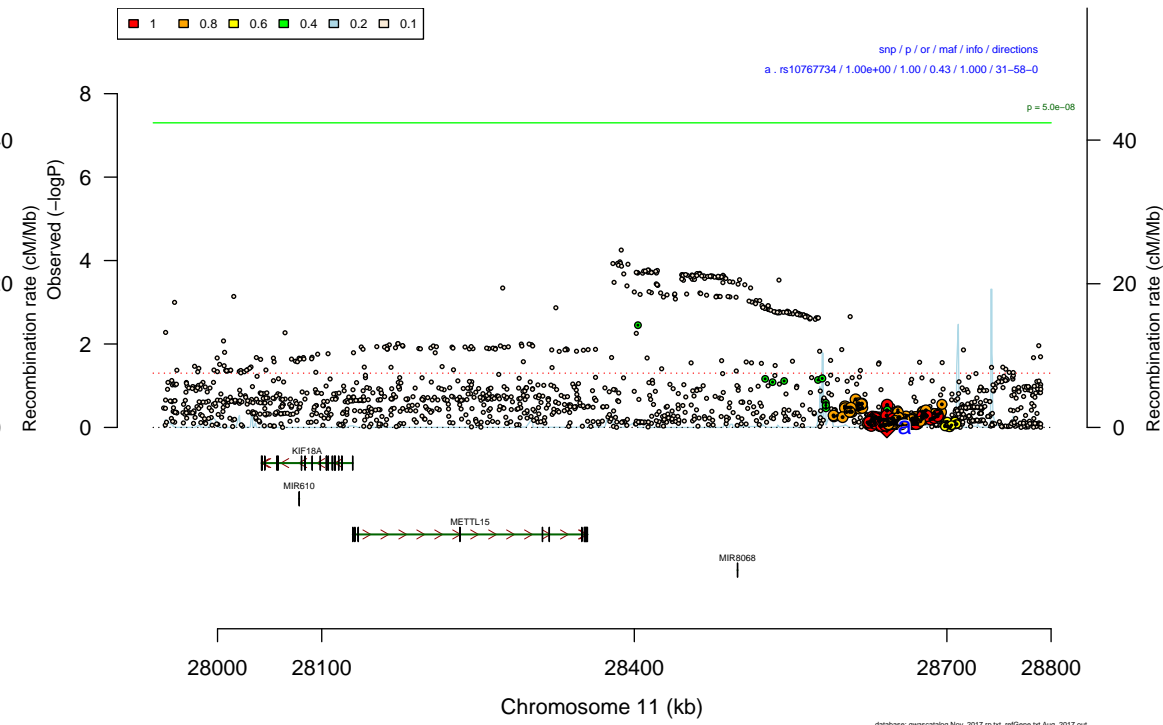

### SCZ\_uncond-rs2022265-chr6

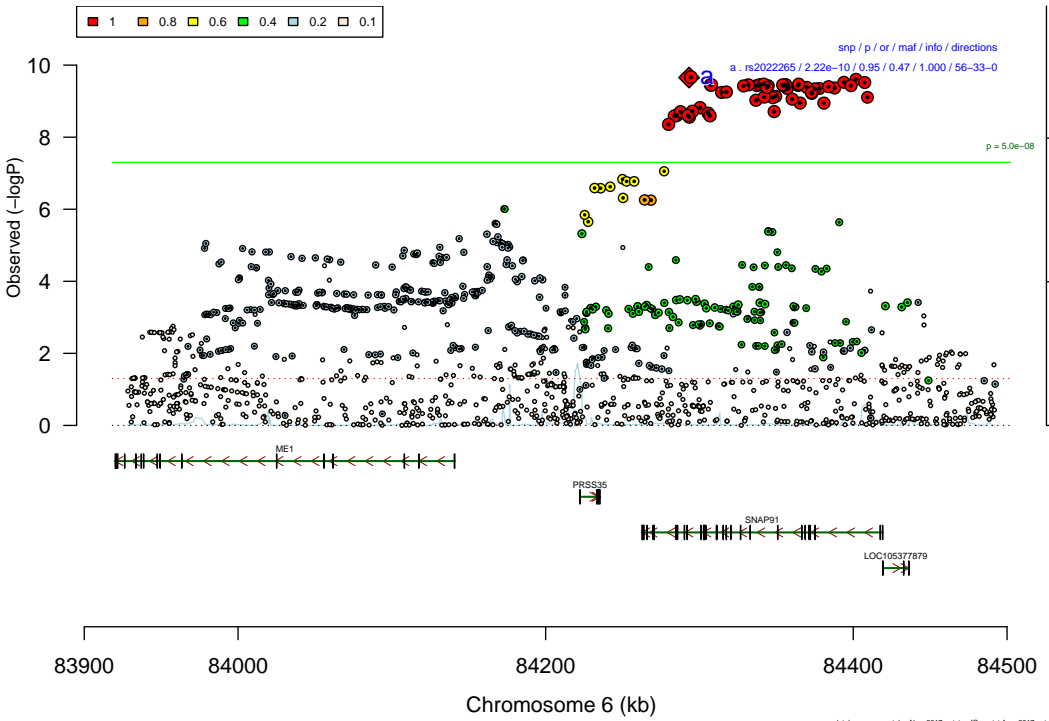

### SCZ\_cond\_rs2022265-chr6

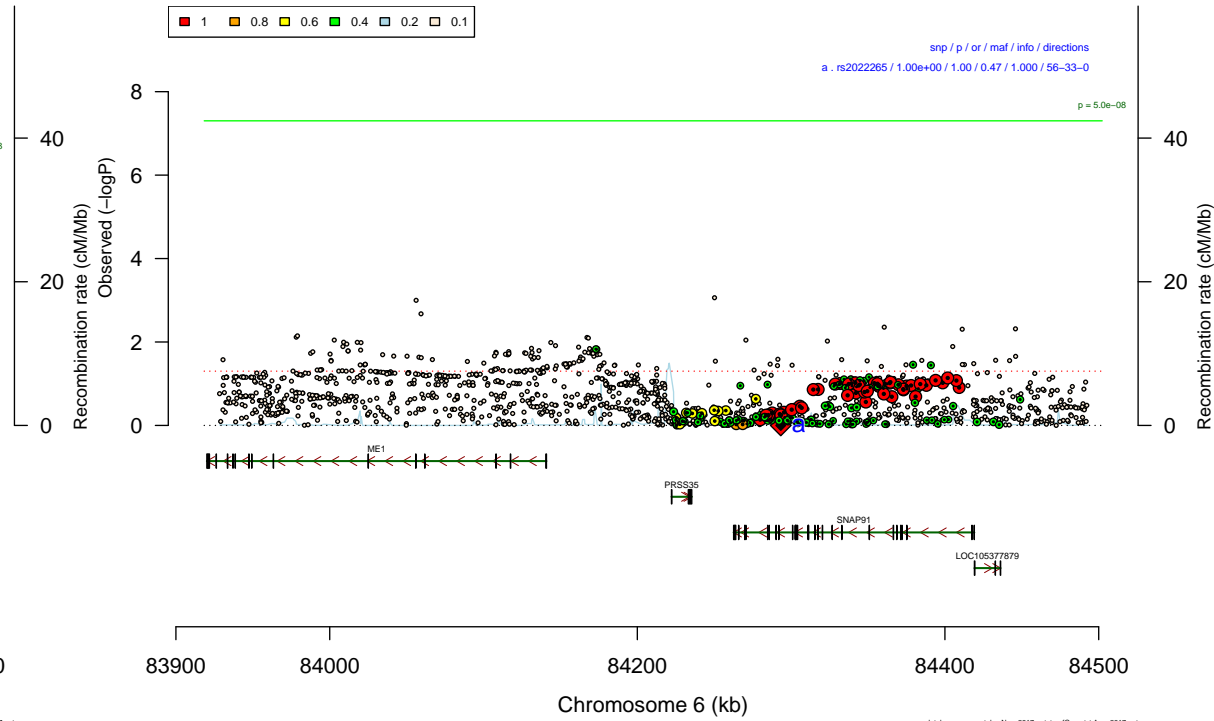



### SCZ\_uncond-rs6577597-chr3

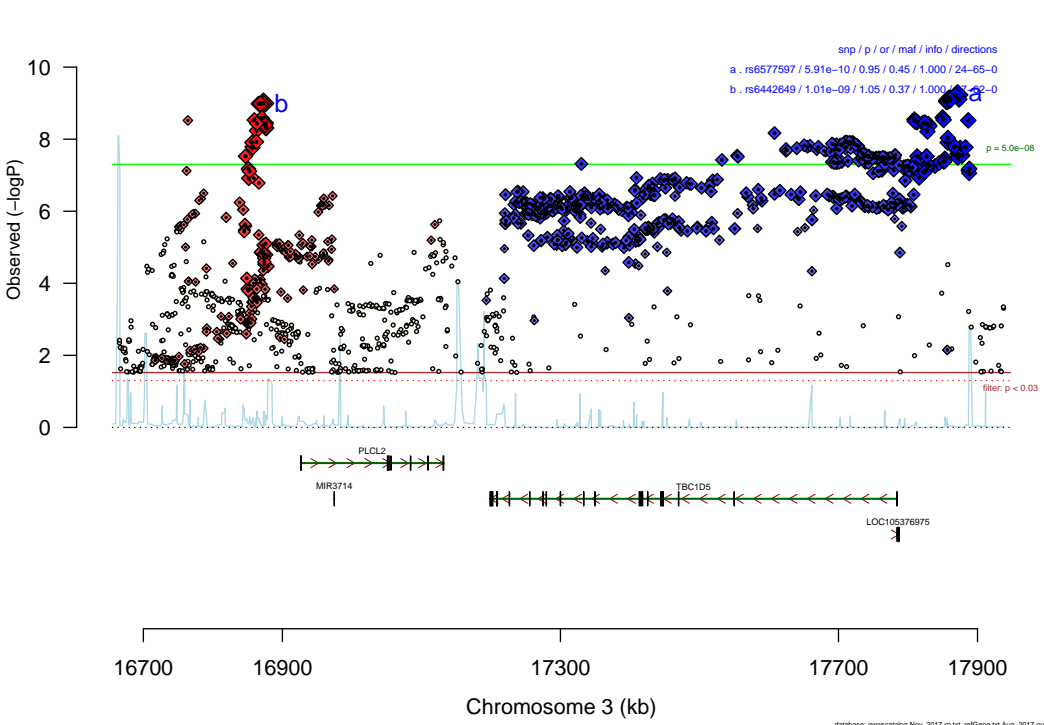

### SCZ\_cond\_rs6577597-chr3

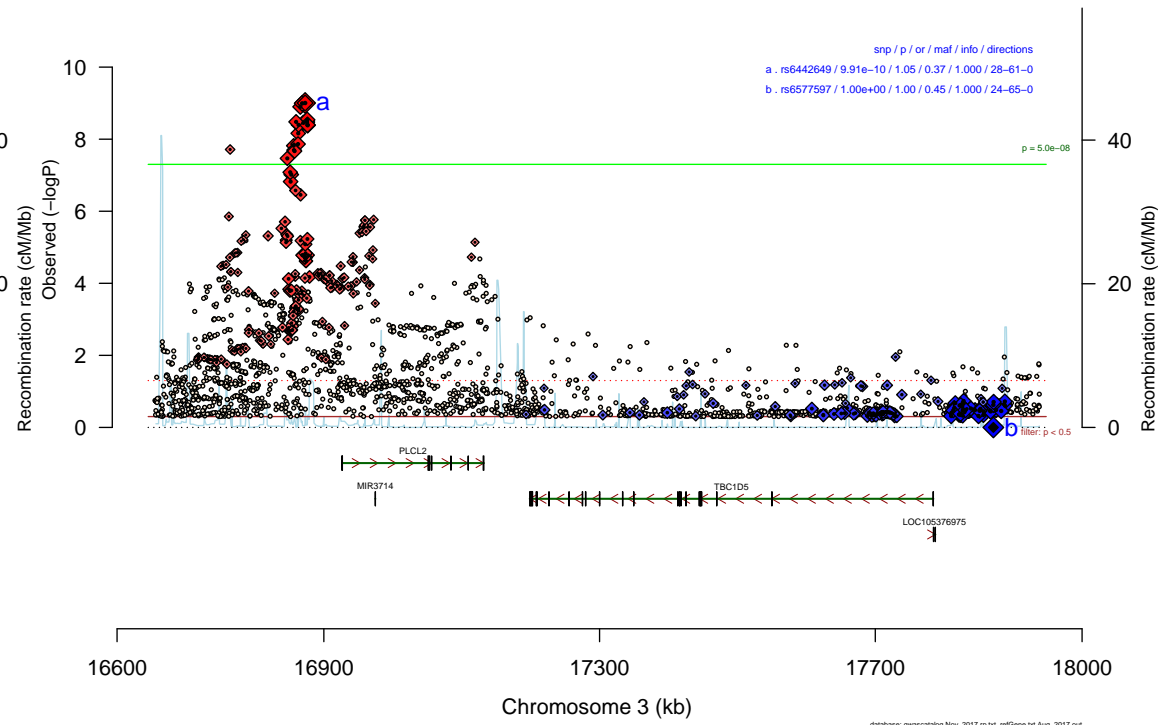

### SCZ\_cond\_rs6577597-rs6442649-chr3

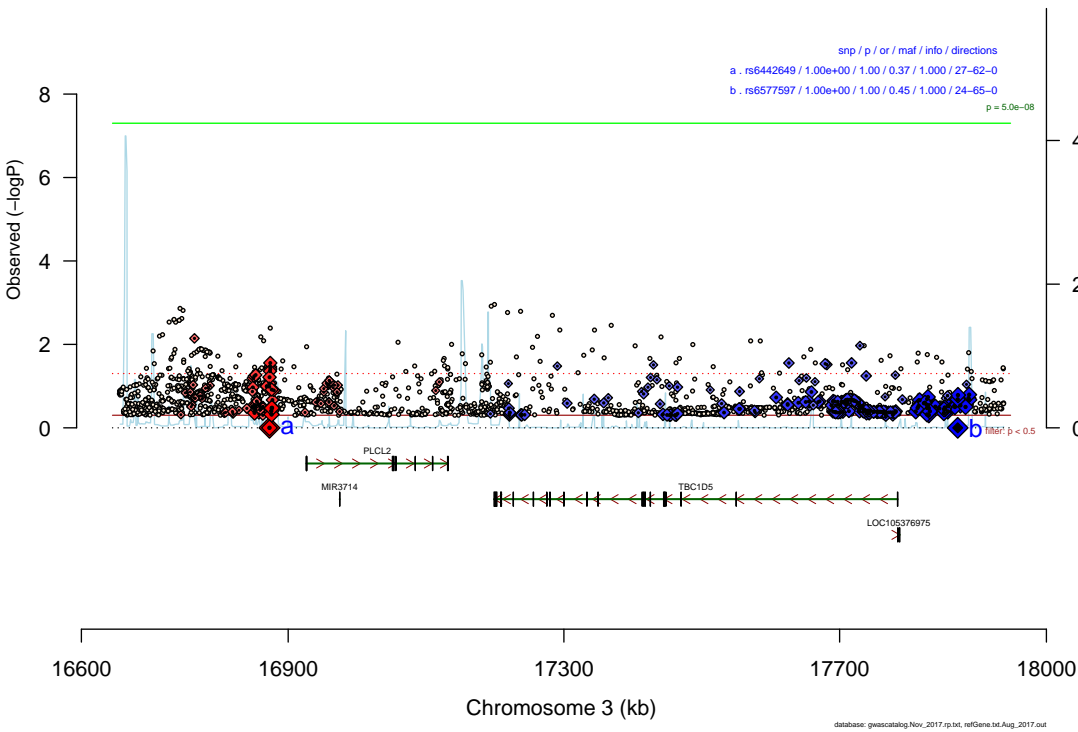

### SCZ\_uncond-rs2238304-chr15

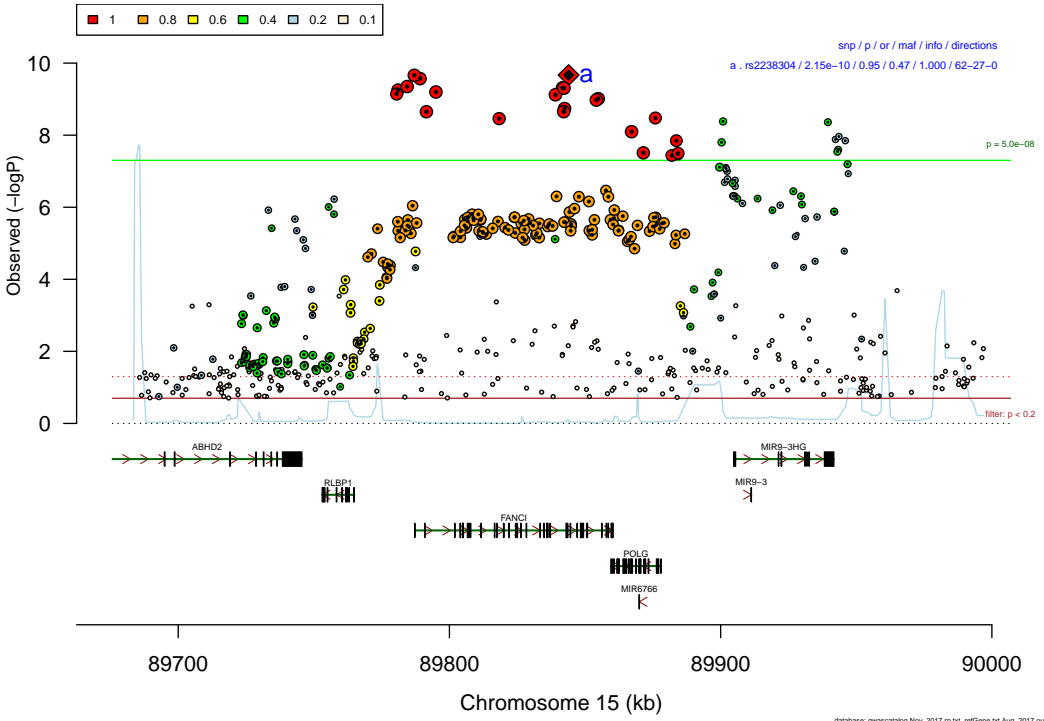

### SCZ\_cond\_rs2238304-chr15

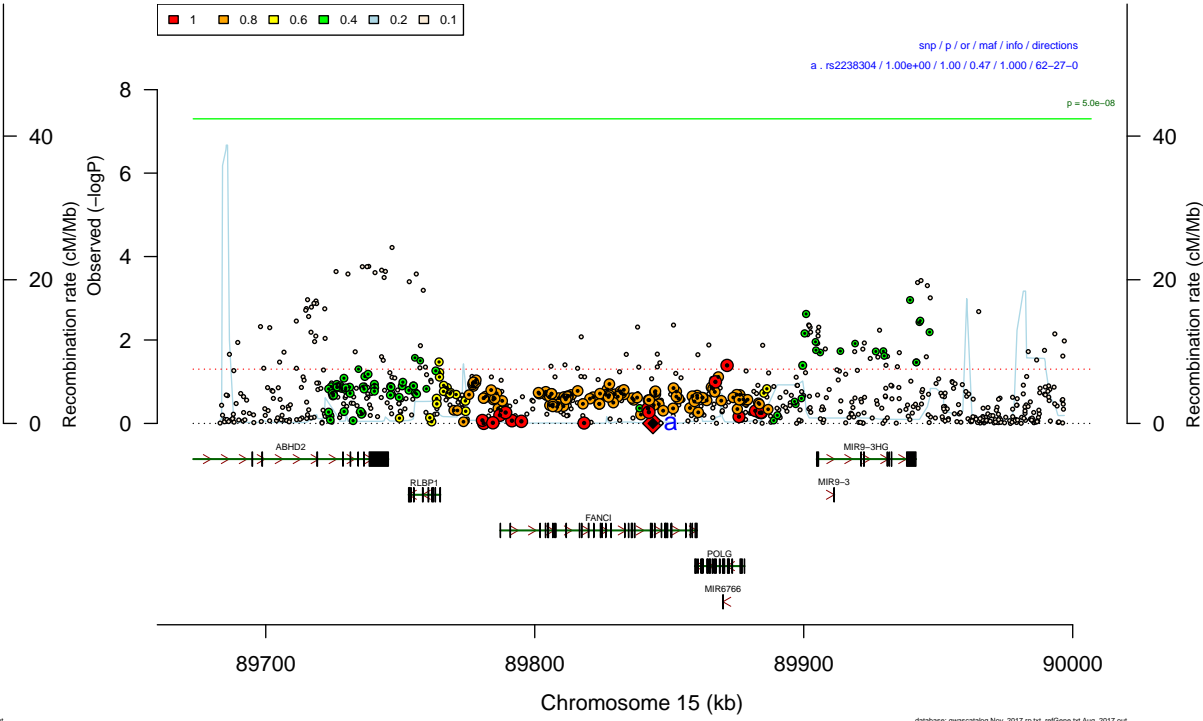

### SCZ\_uncond-rs35164357-chr5

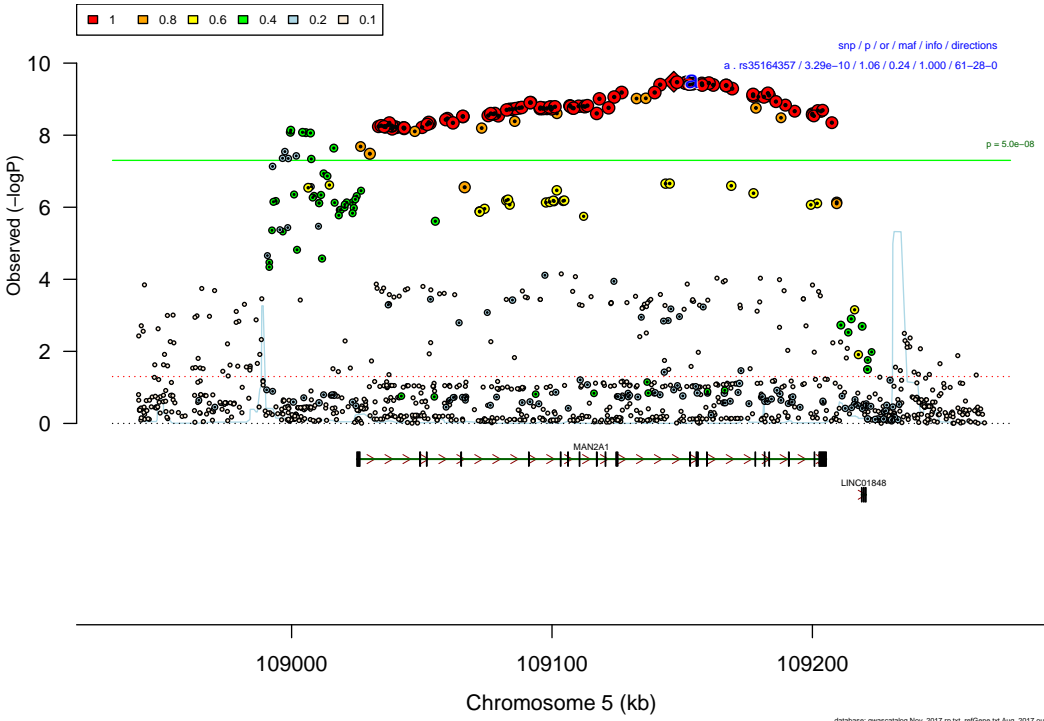

### SCZ\_cond\_rs35164357-chr5

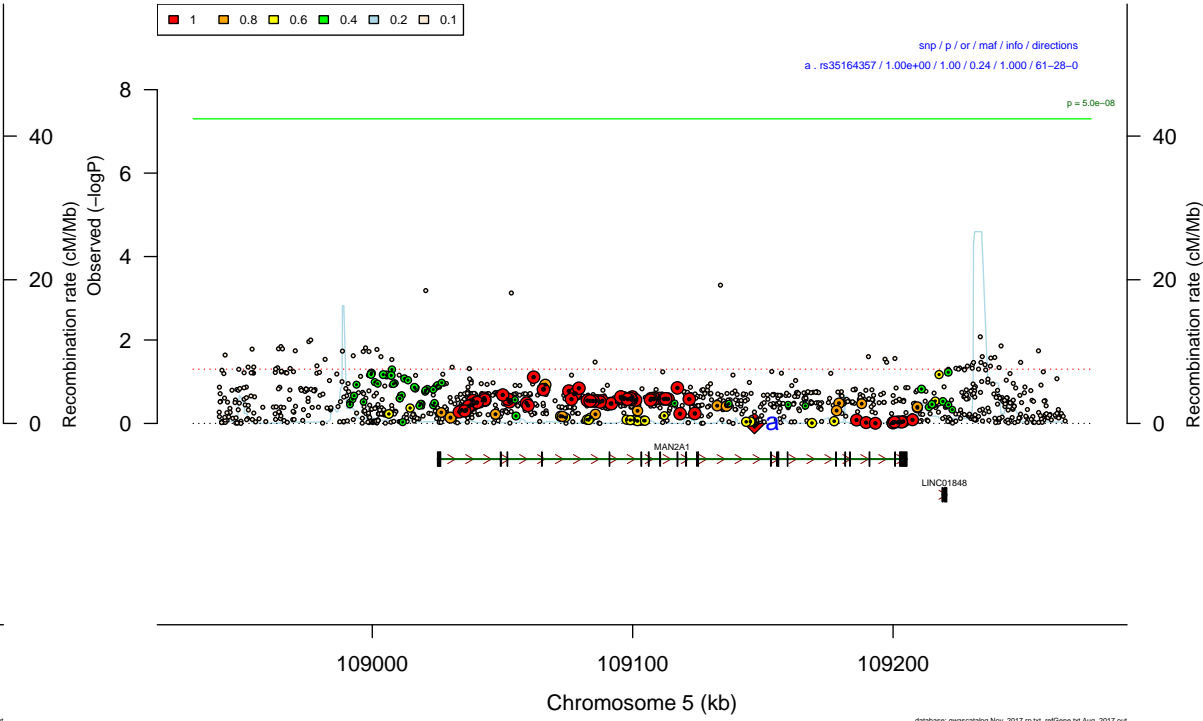

SCZ\_uncond-rs9597388-chr13

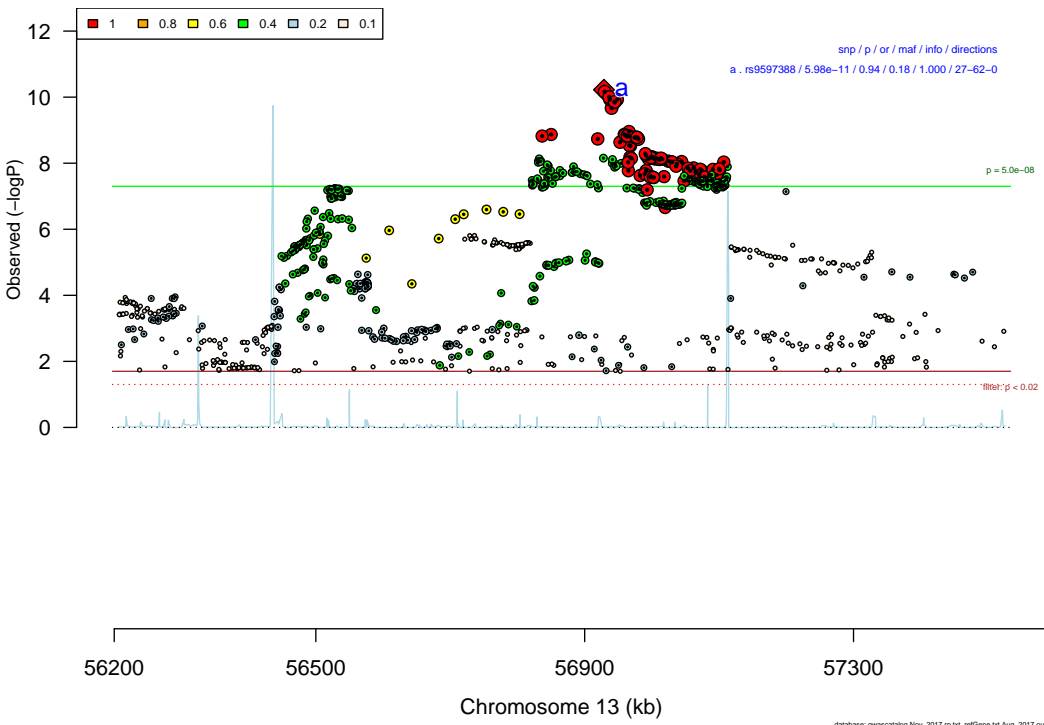

SCZ\_cond\_rs9597388-chr13

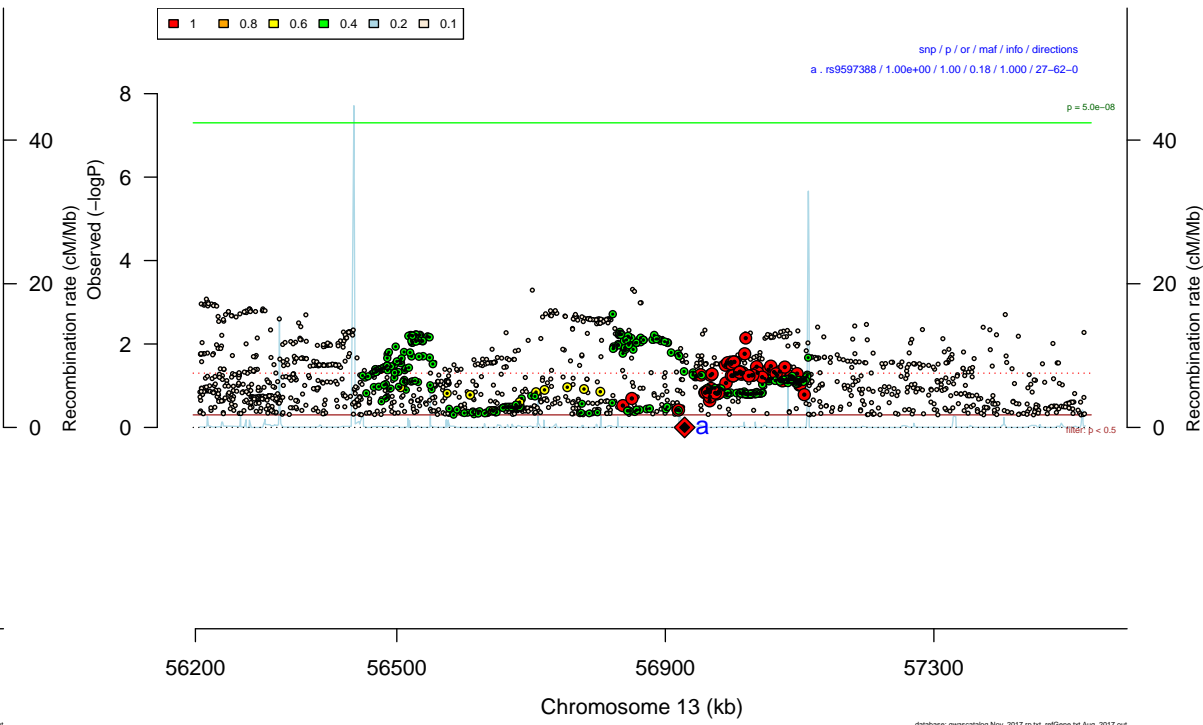

### SCZ\_uncond-rs115325222-chr5

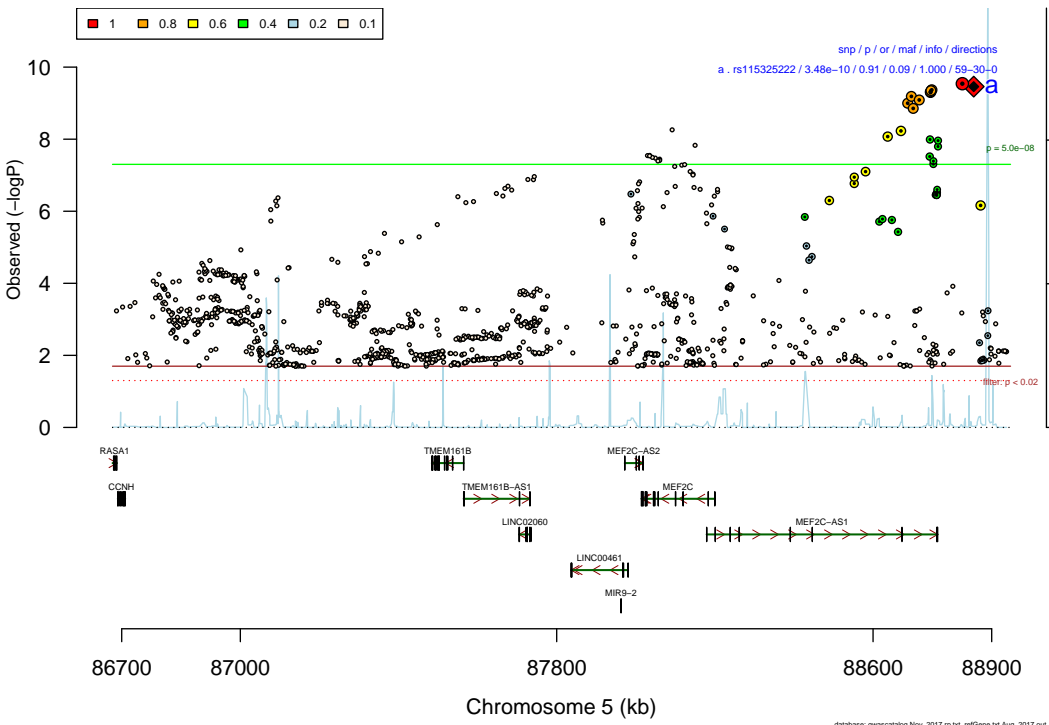

### SCZ\_cond\_rs115325222-chr5

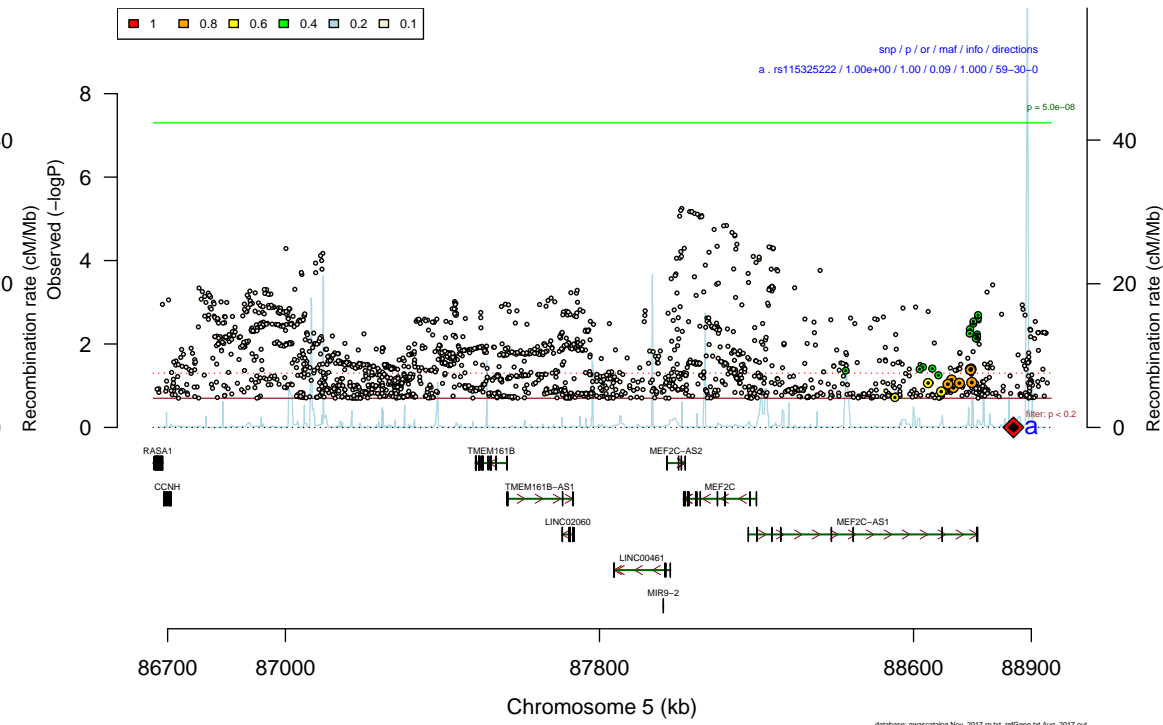

### SCZ\_uncond-rs4793888-chr17

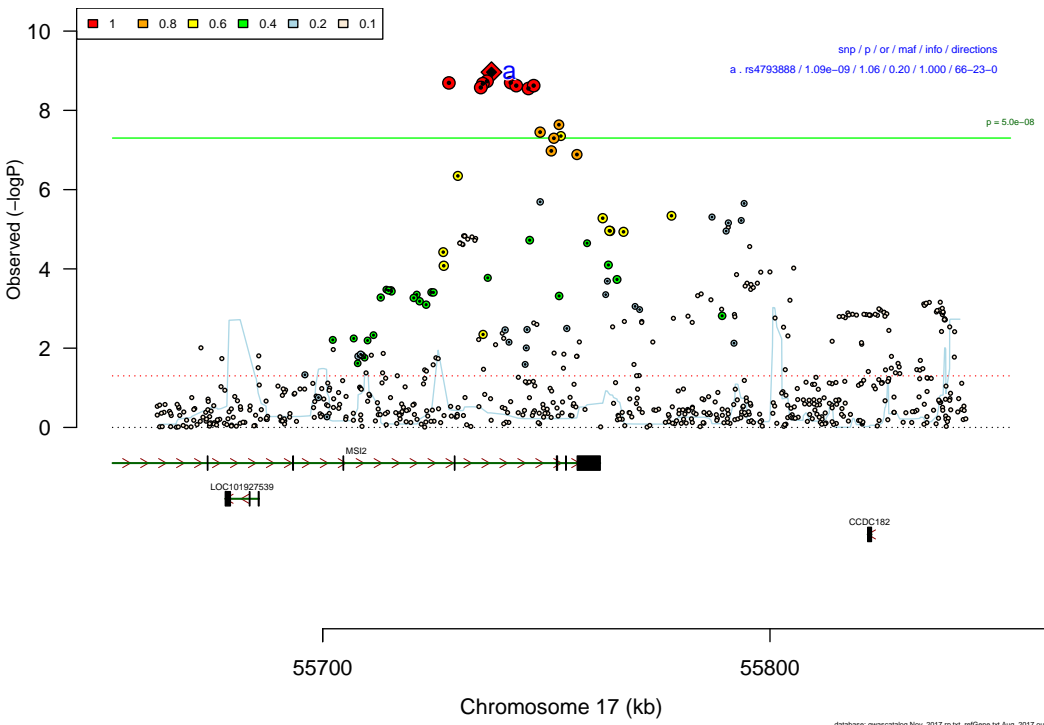

### SCZ\_cond\_rs4793888-chr17

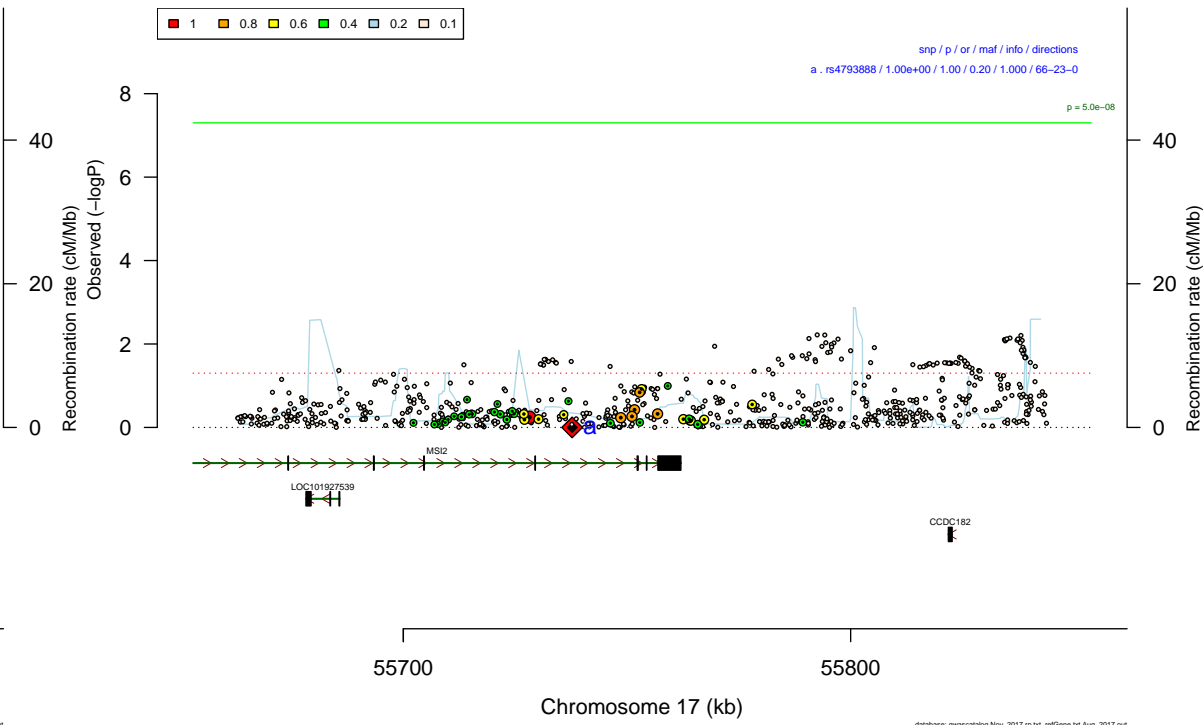

### SCZ\_uncond-rs6430492-chr2

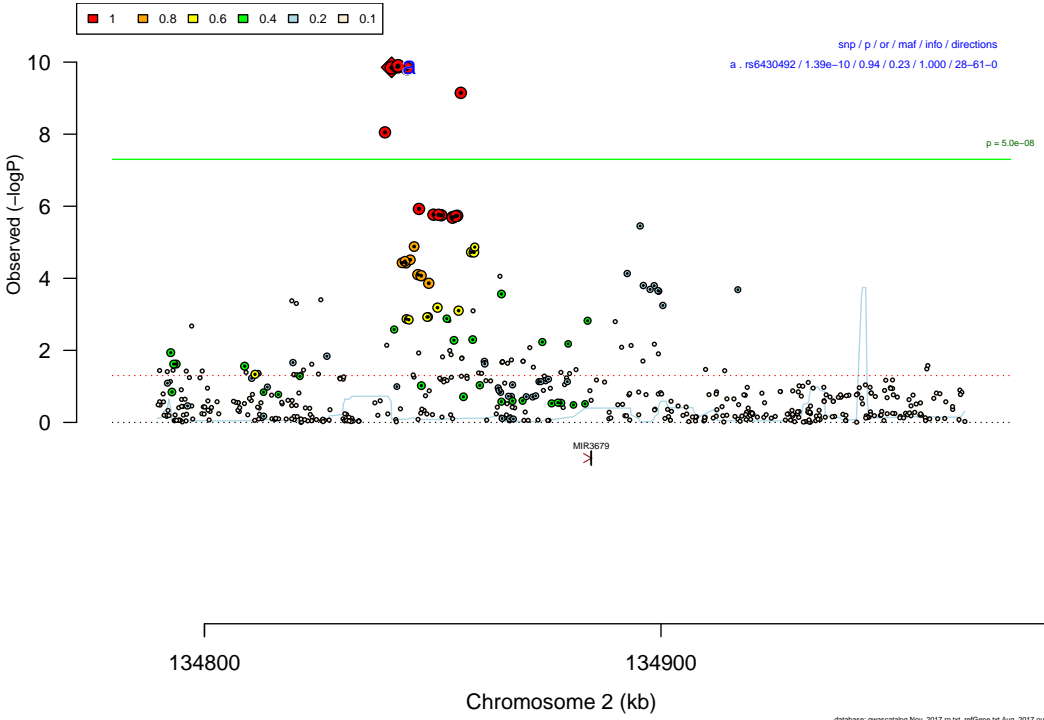

### SCZ\_cond\_rs6430492-chr2

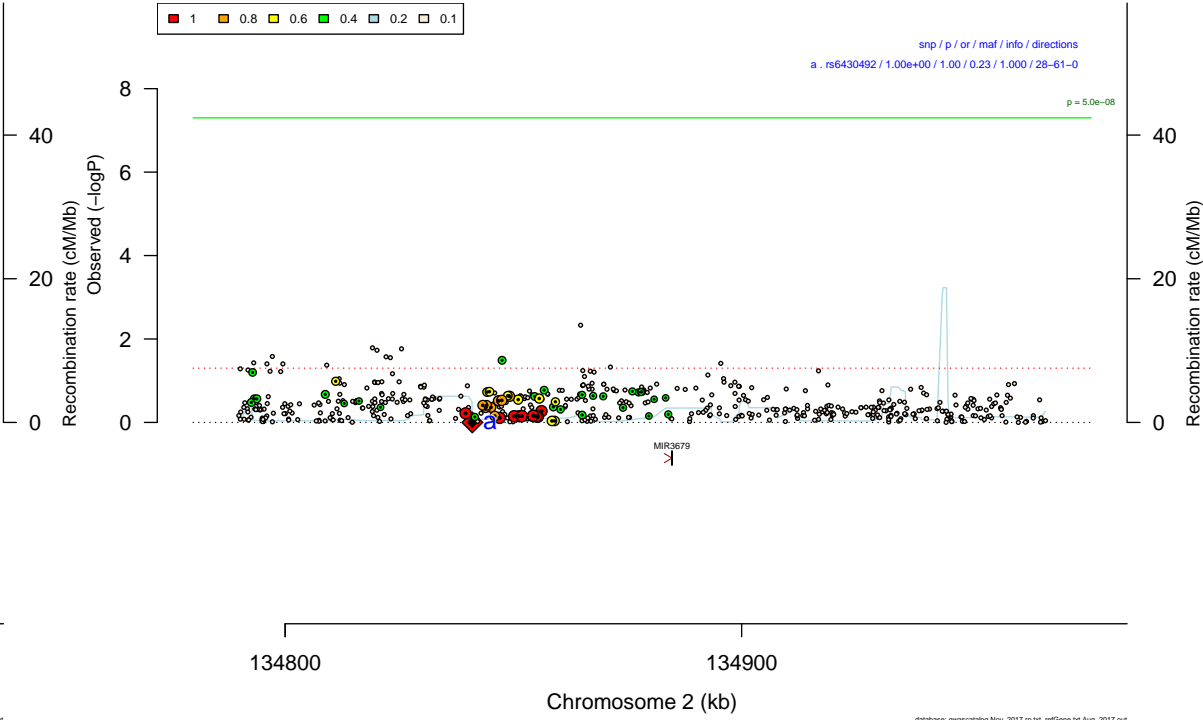

### SCZ\_uncond-rs35734242-chr4

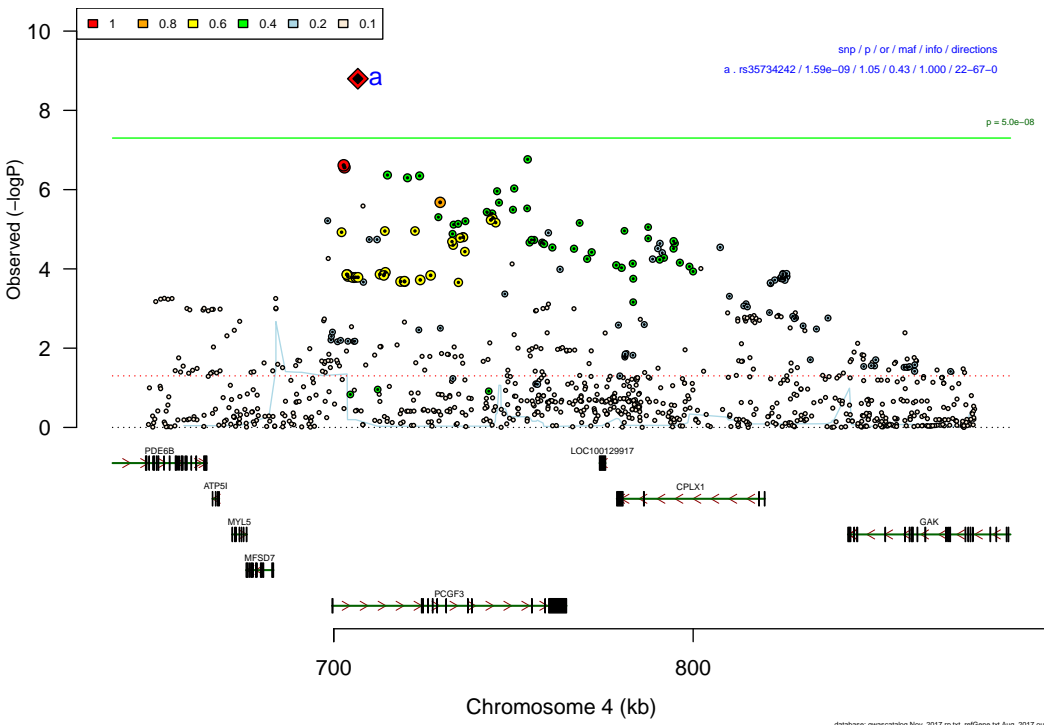

### SCZ\_cond\_rs35734242-chr4

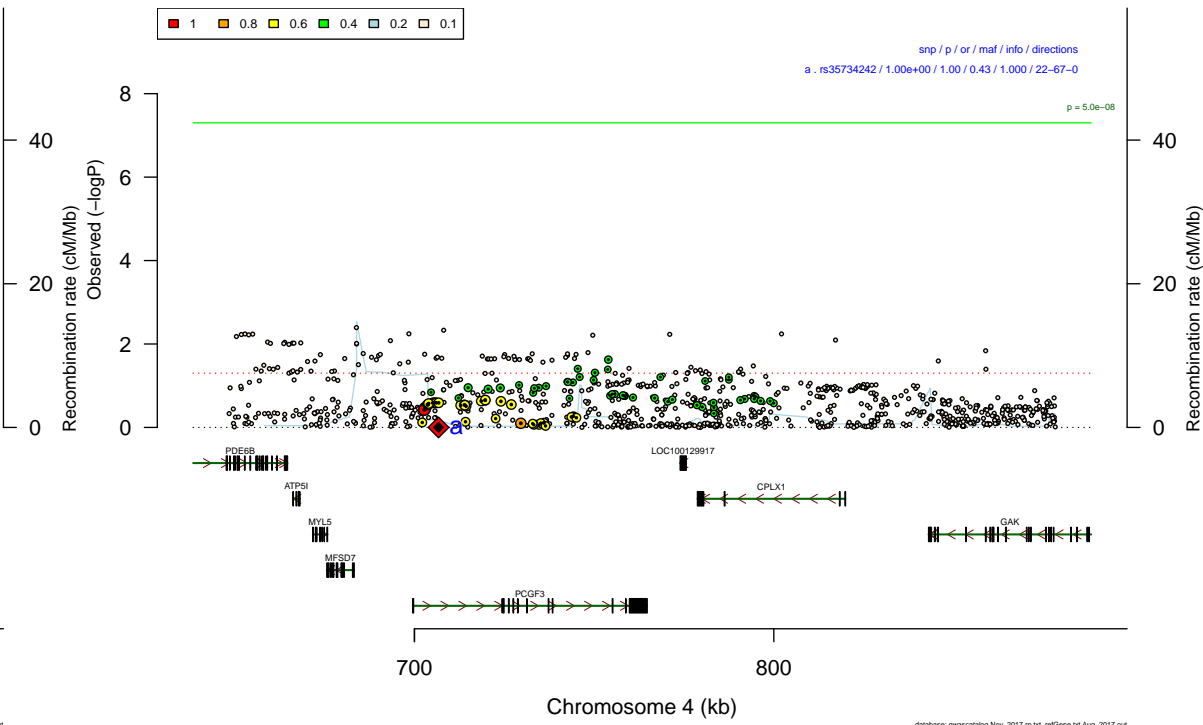



### SCZ\_uncond-rs11696755-chr20

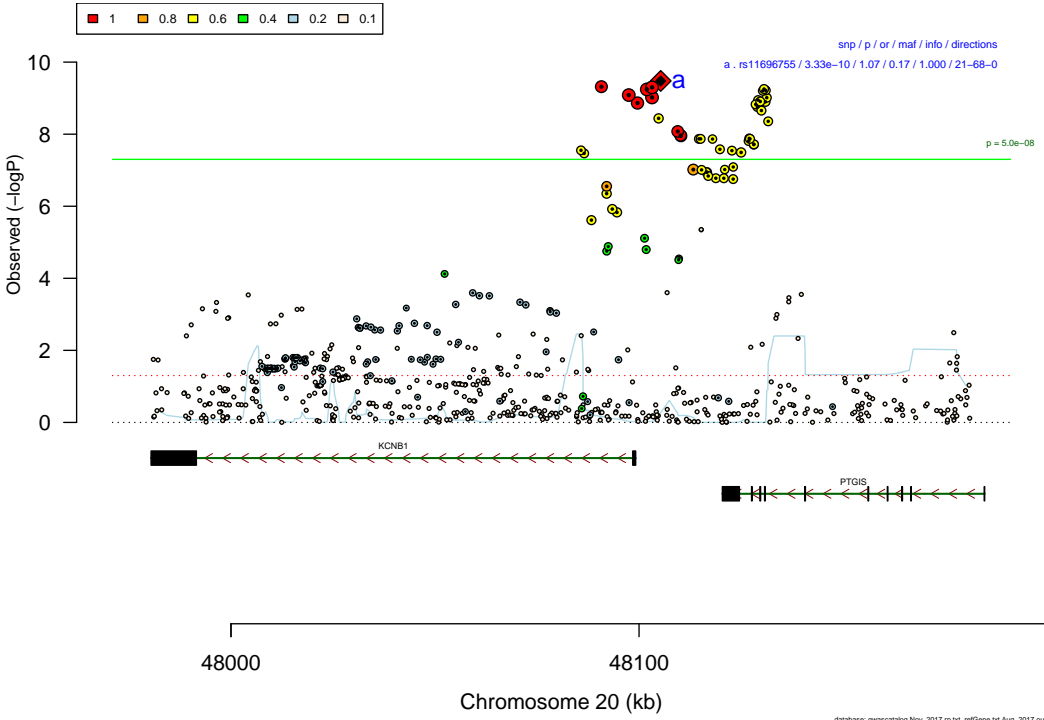

### SCZ\_cond\_rs11696755-chr20

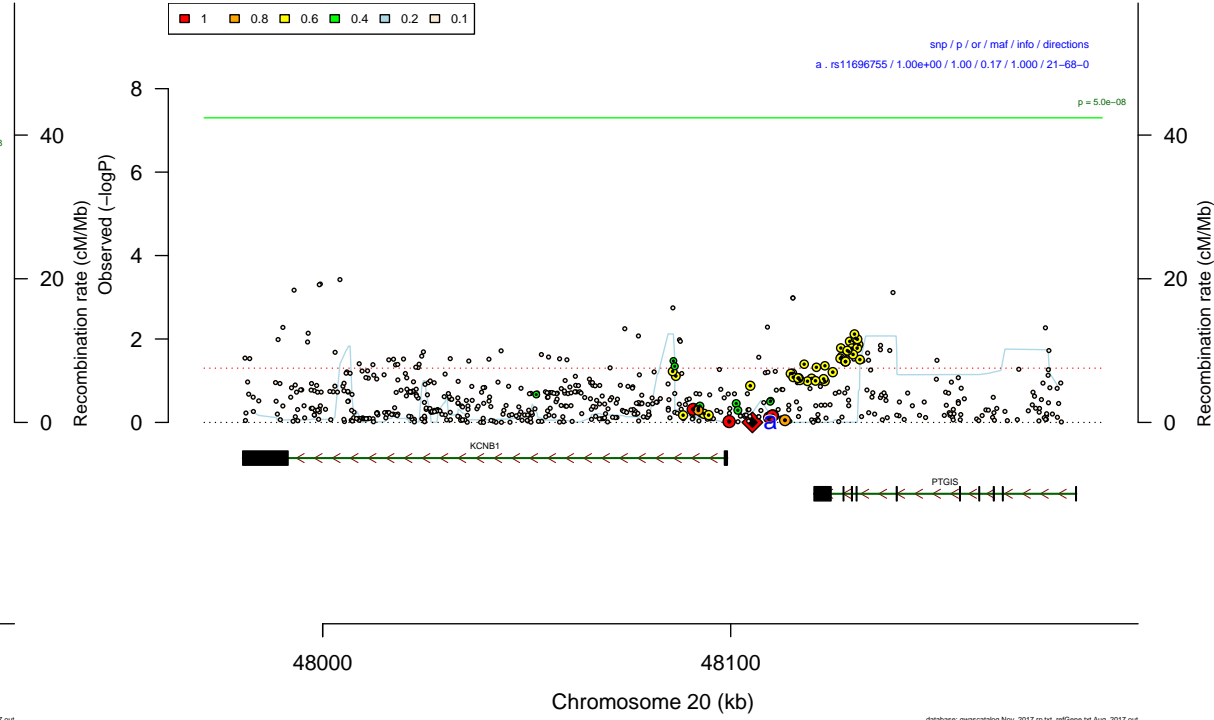

### SCZ\_uncond-rs11121172-chr1

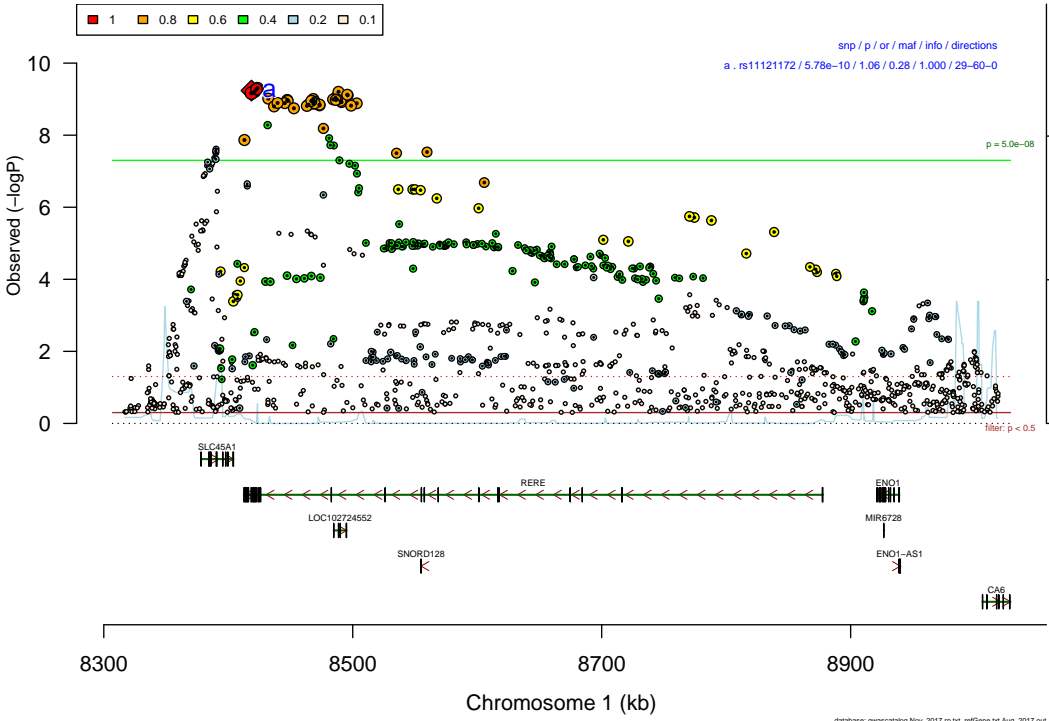

### SCZ\_cond\_rs11121172-chr1

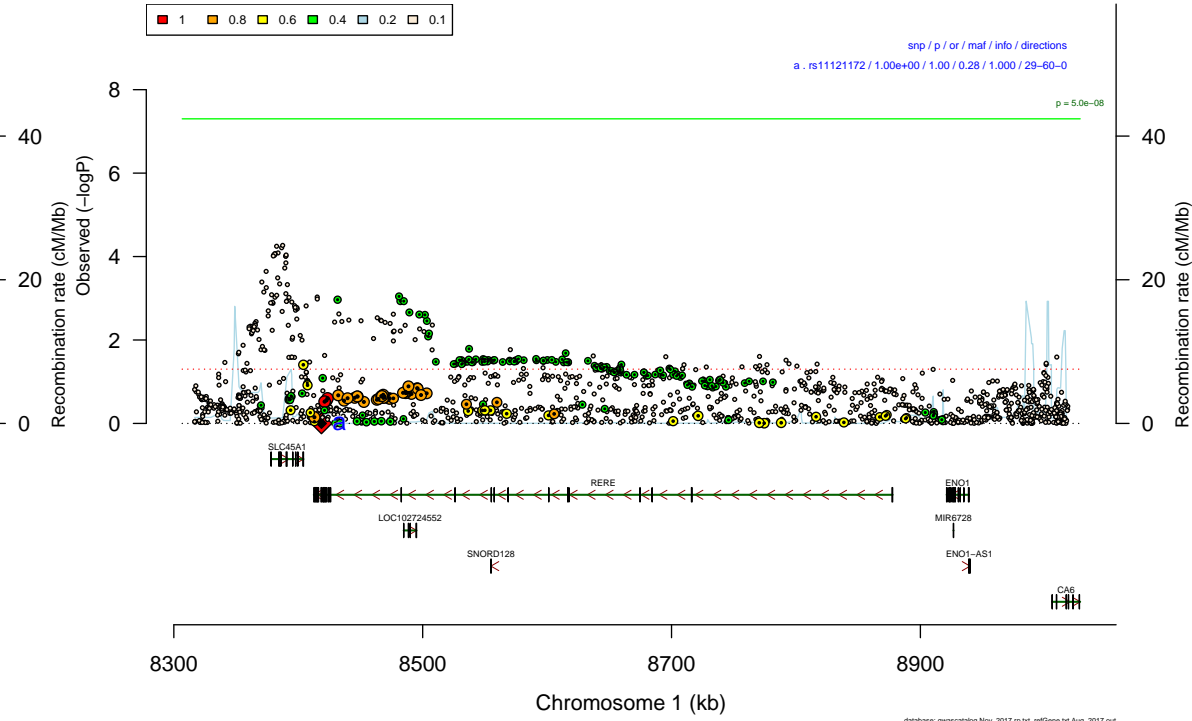

SCZ\_uncond-rs1540840-chr14

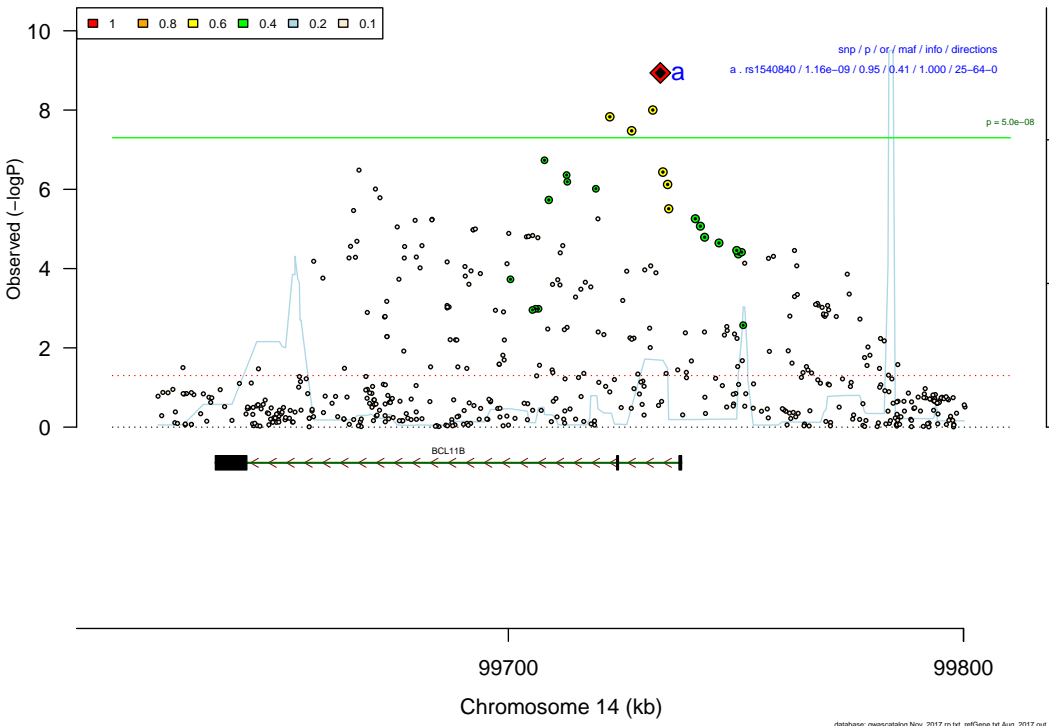

SCZ\_cond\_rs1540840-chr14

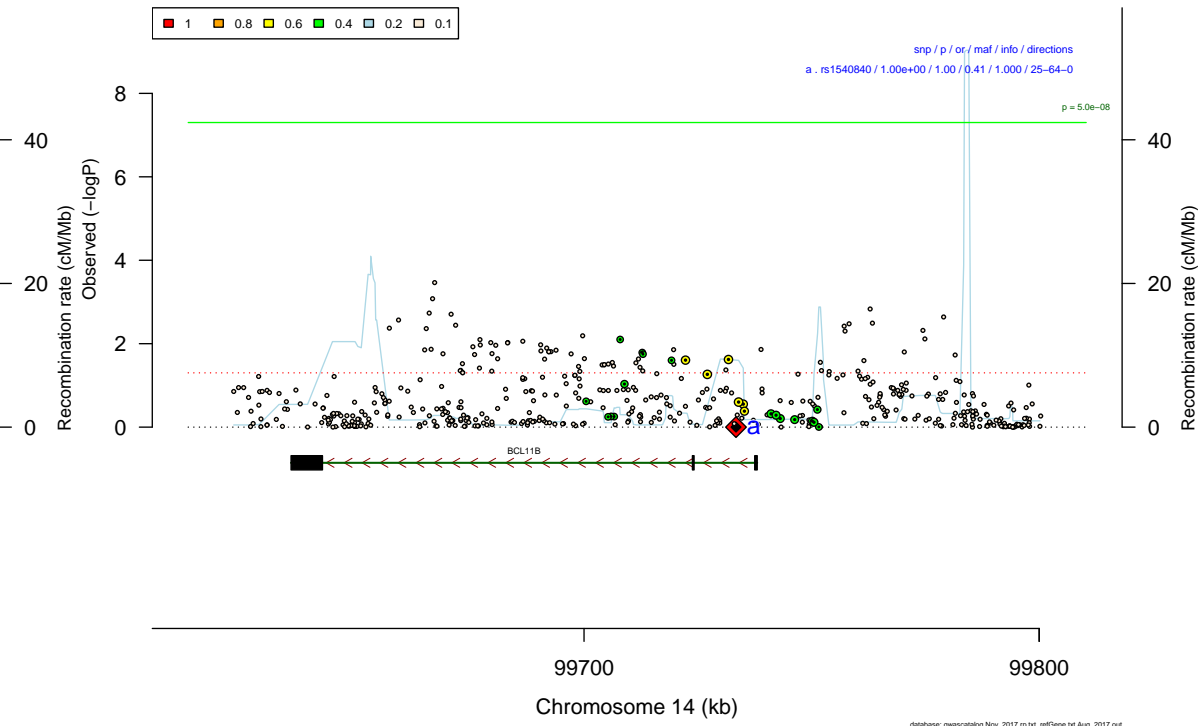

### SCZ\_uncond-rs72974269-chr2

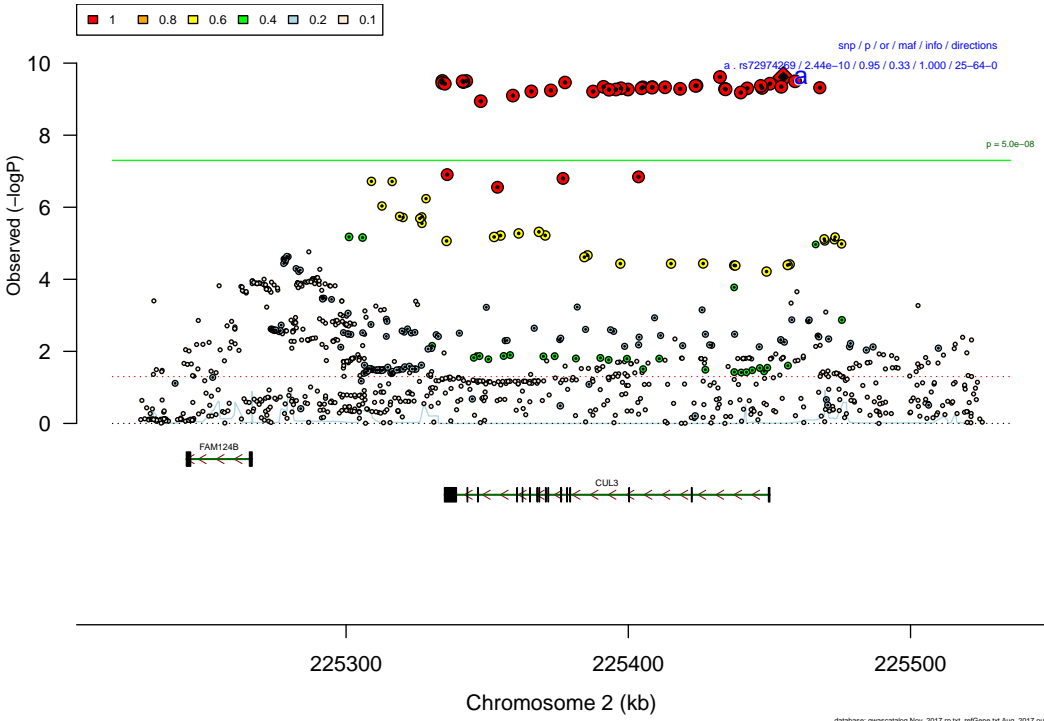

### SCZ\_cond\_rs72974269-chr2

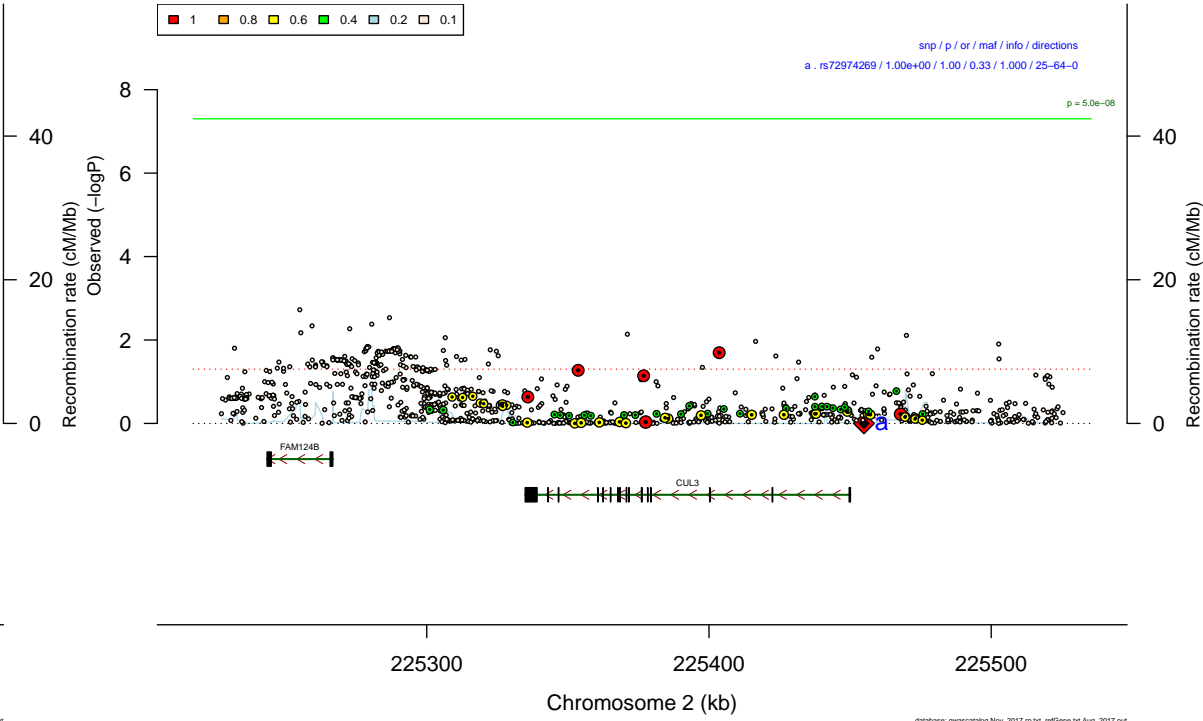

### SCZ\_uncond-rs2153960-chr6

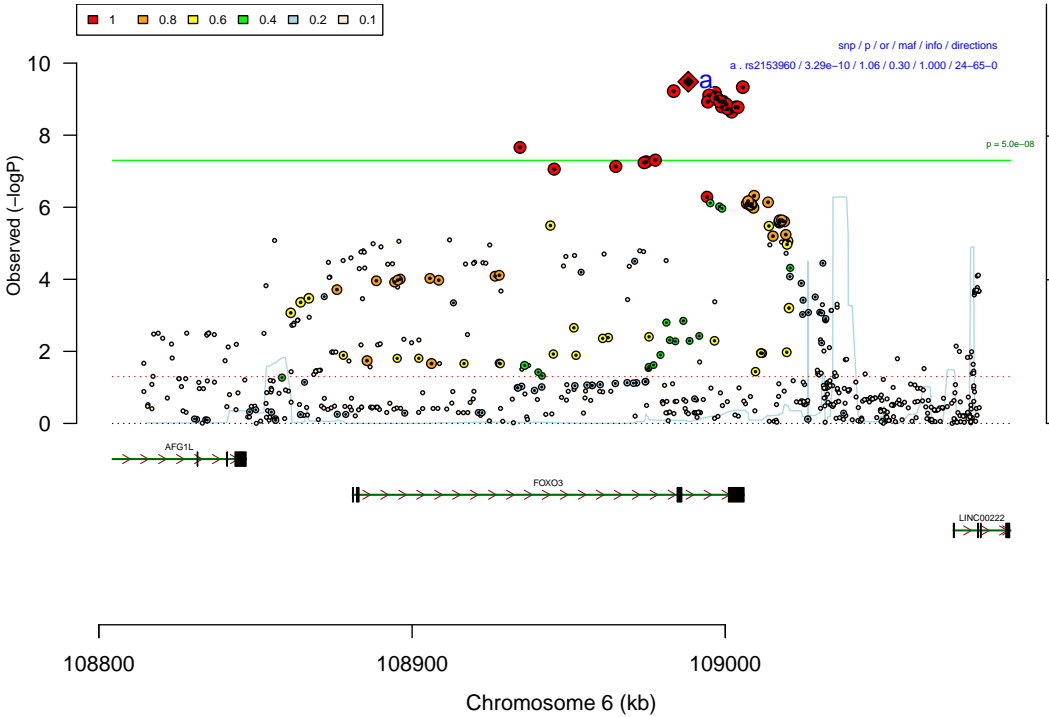

### SCZ\_cond\_rs2153960-chr6

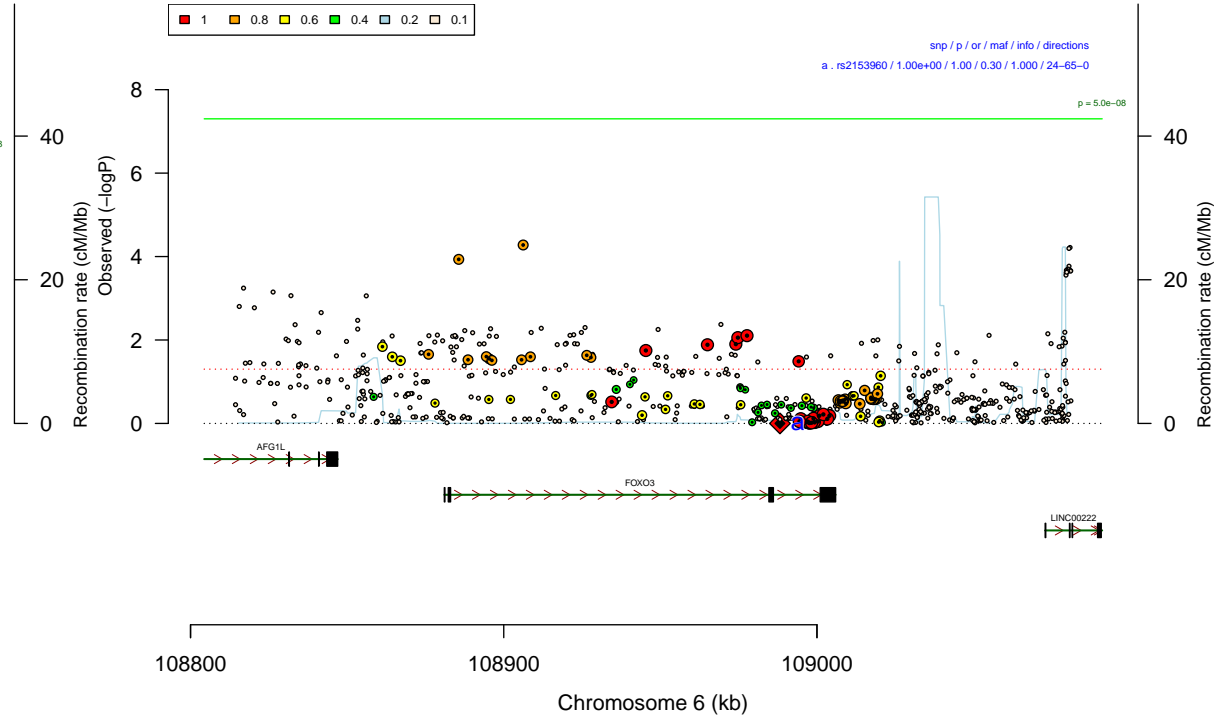

### SCZ\_uncond-rs12138231-chr1

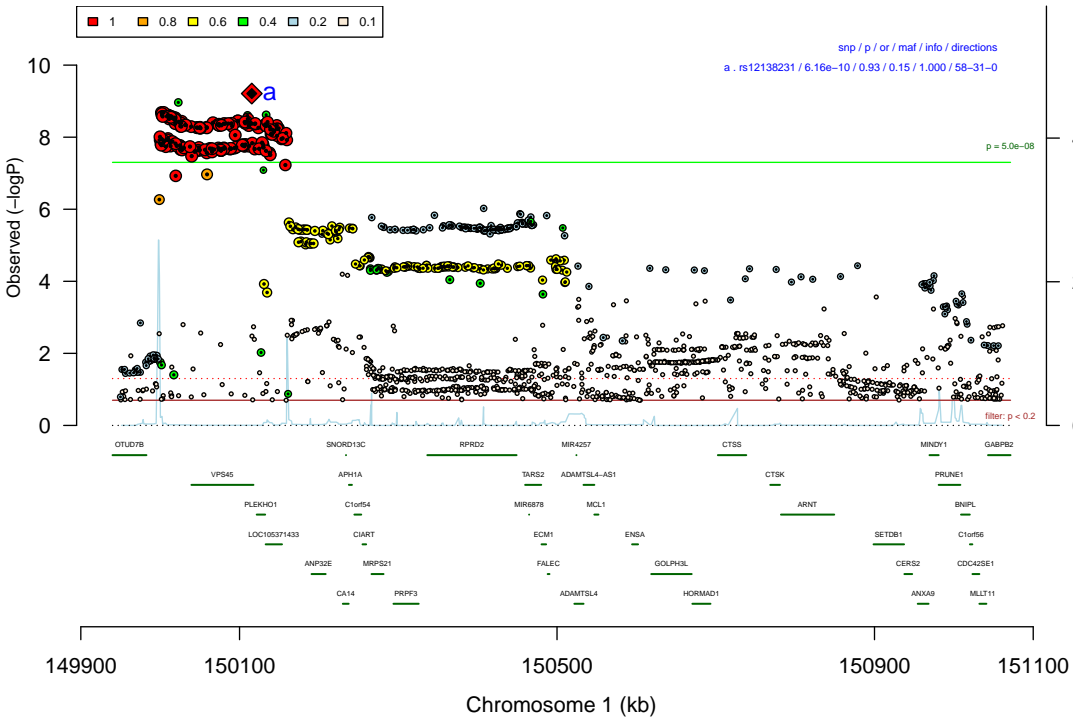

### SCZ\_cond\_rs12138231-chr1

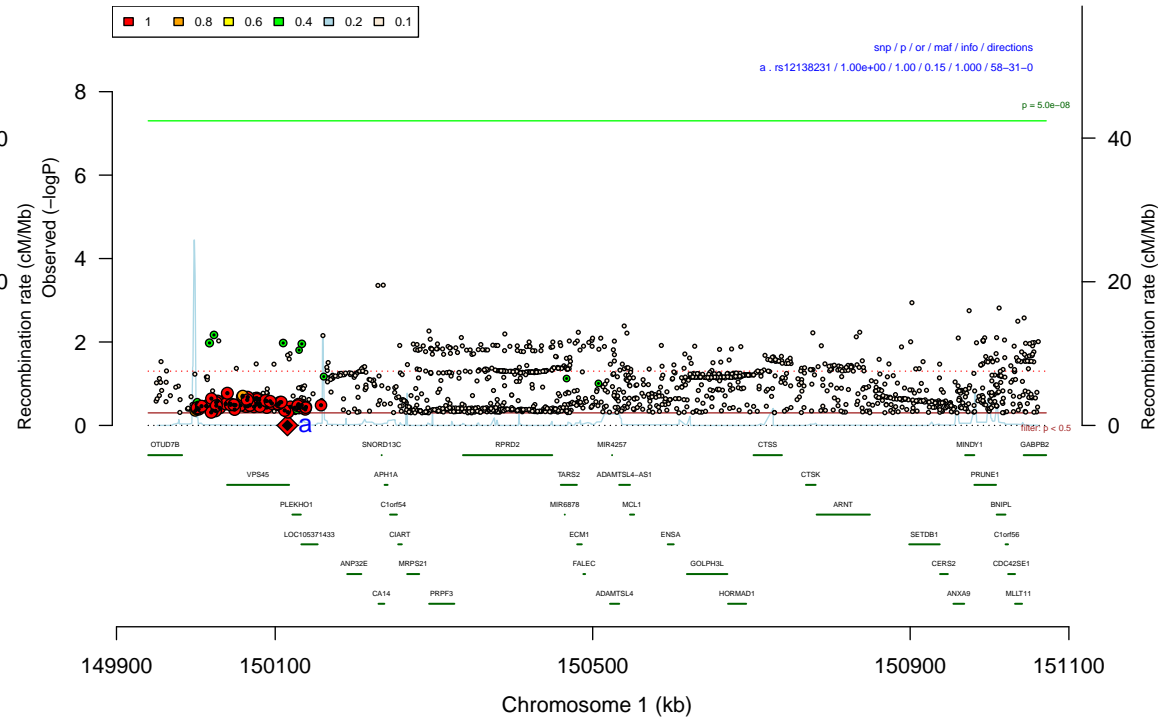

### SCZ\_uncond-rs7816998-chr8

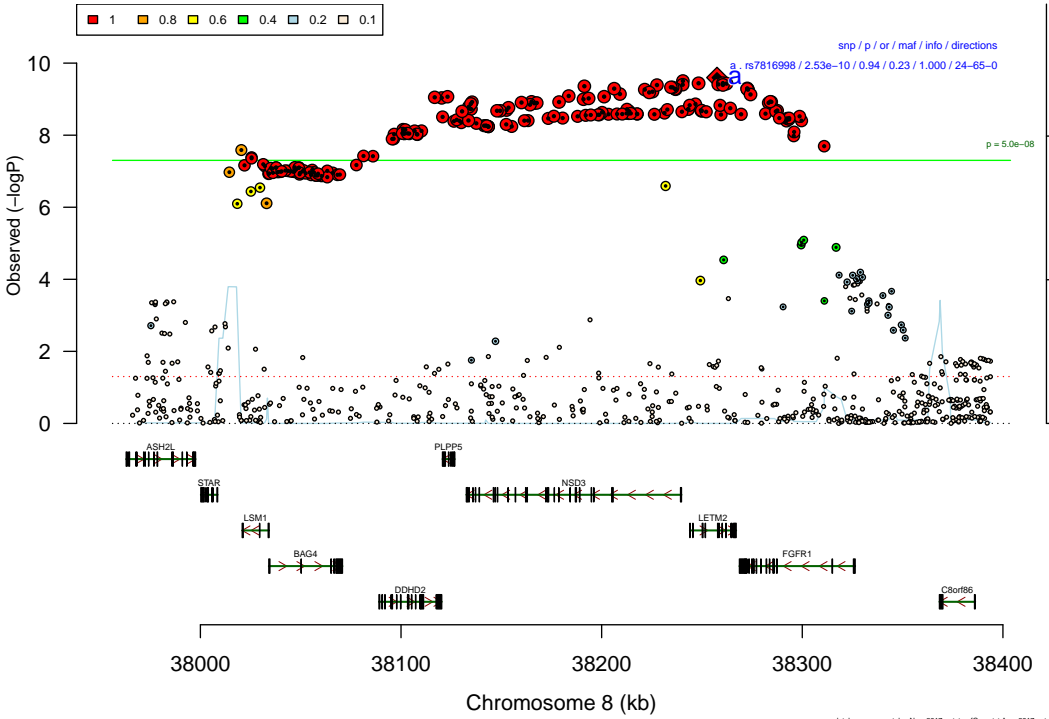

### SCZ\_cond\_rs7816998-chr8

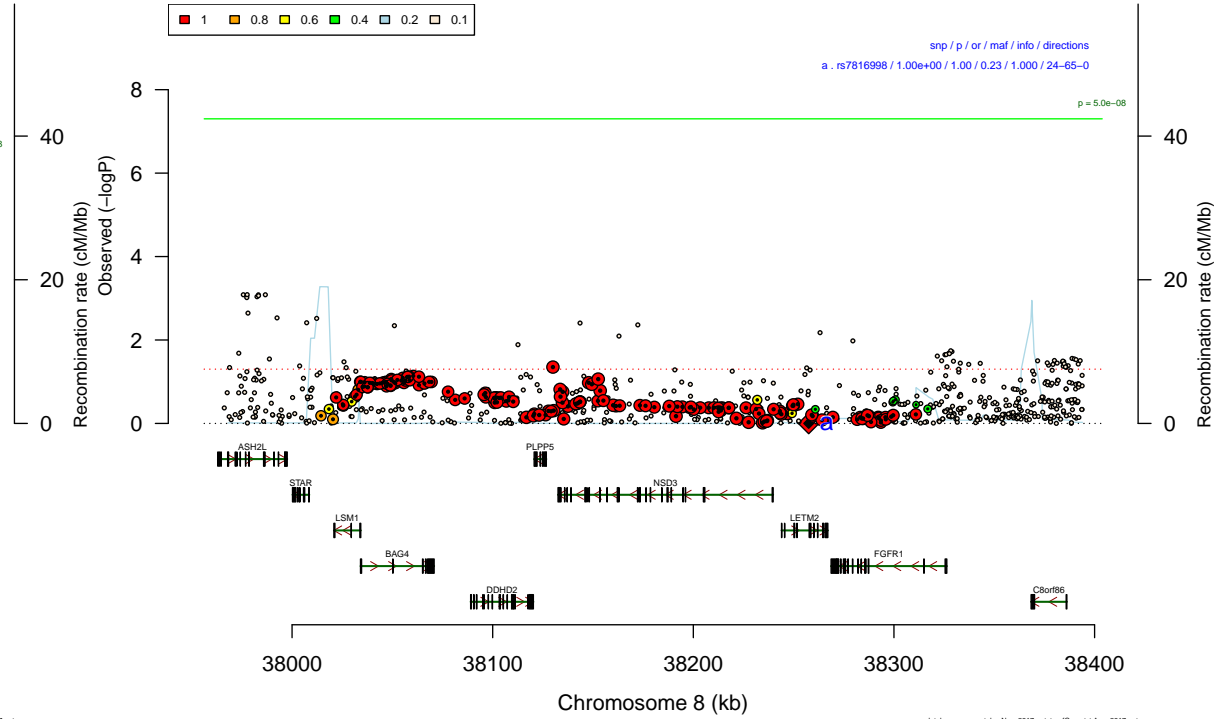

SCZ\_uncond-rs634940-chr6

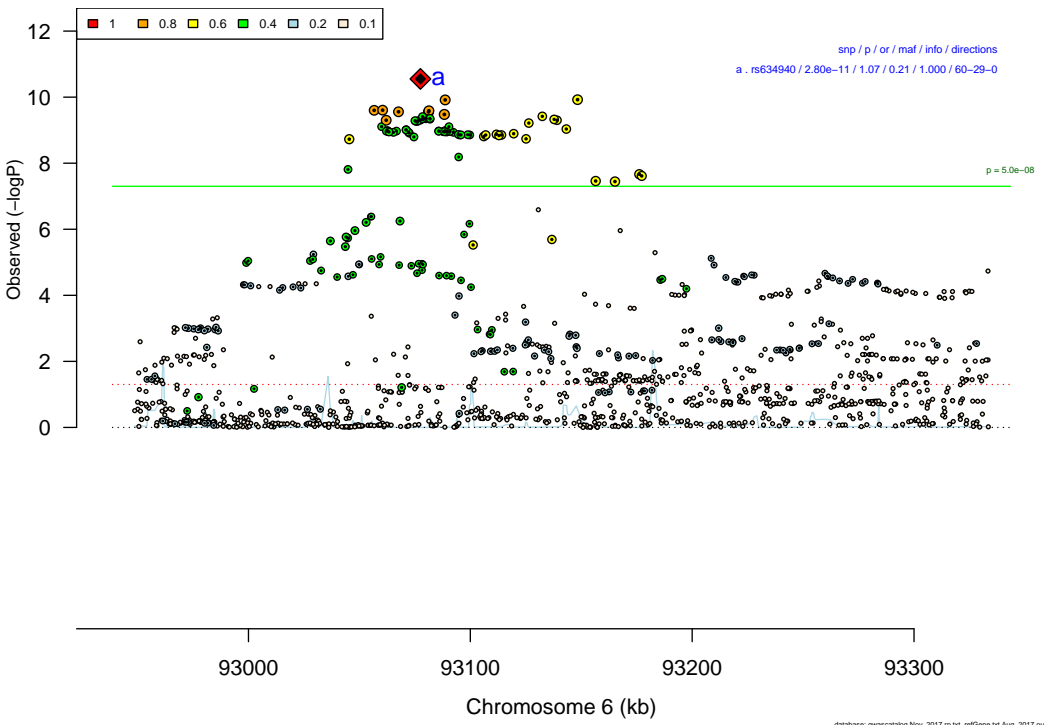

SCZ\_cond\_rs634940-chr6

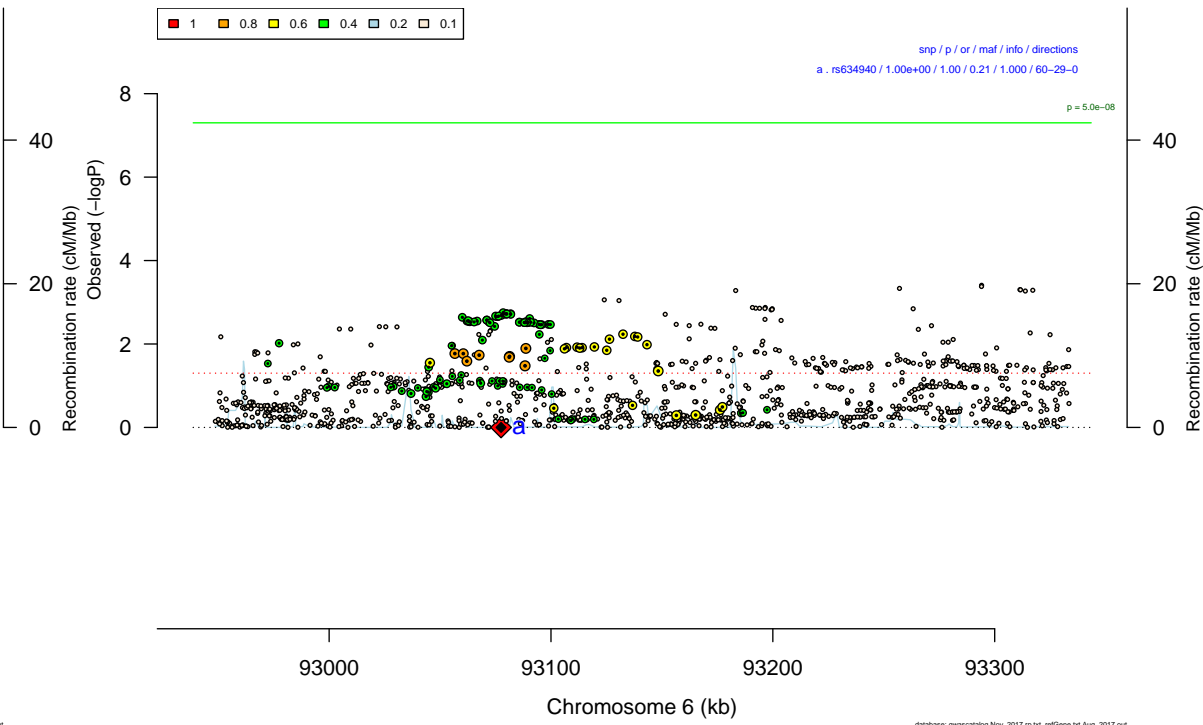



### SCZ\_uncond-rs6538539-chr12

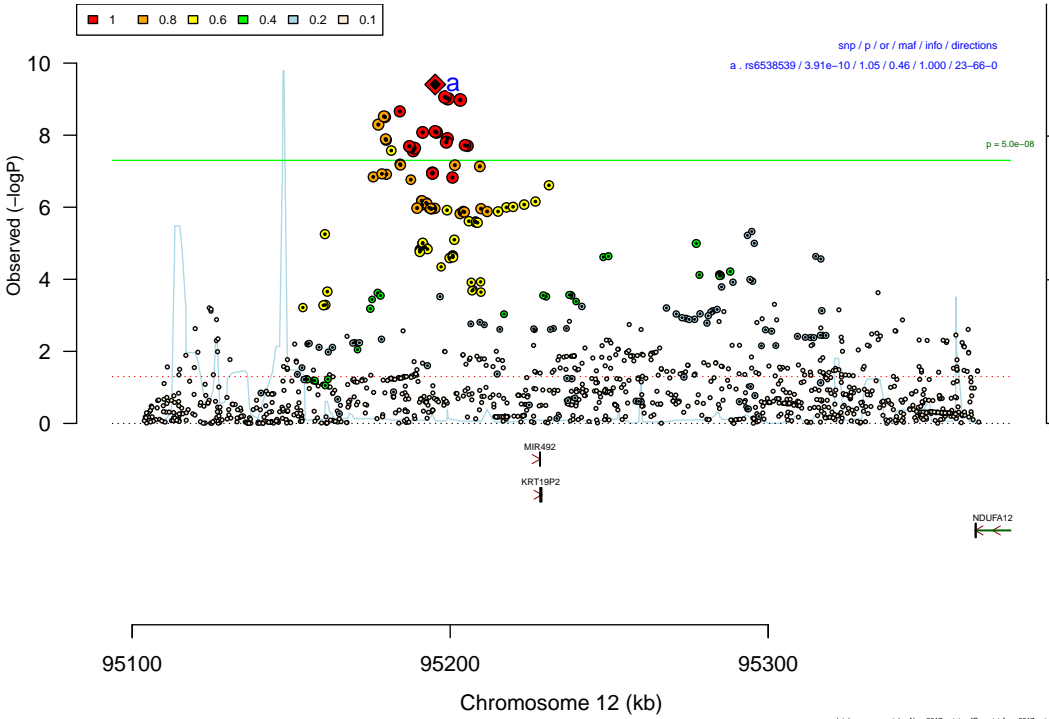

### SCZ\_cond\_rs6538539-chr12

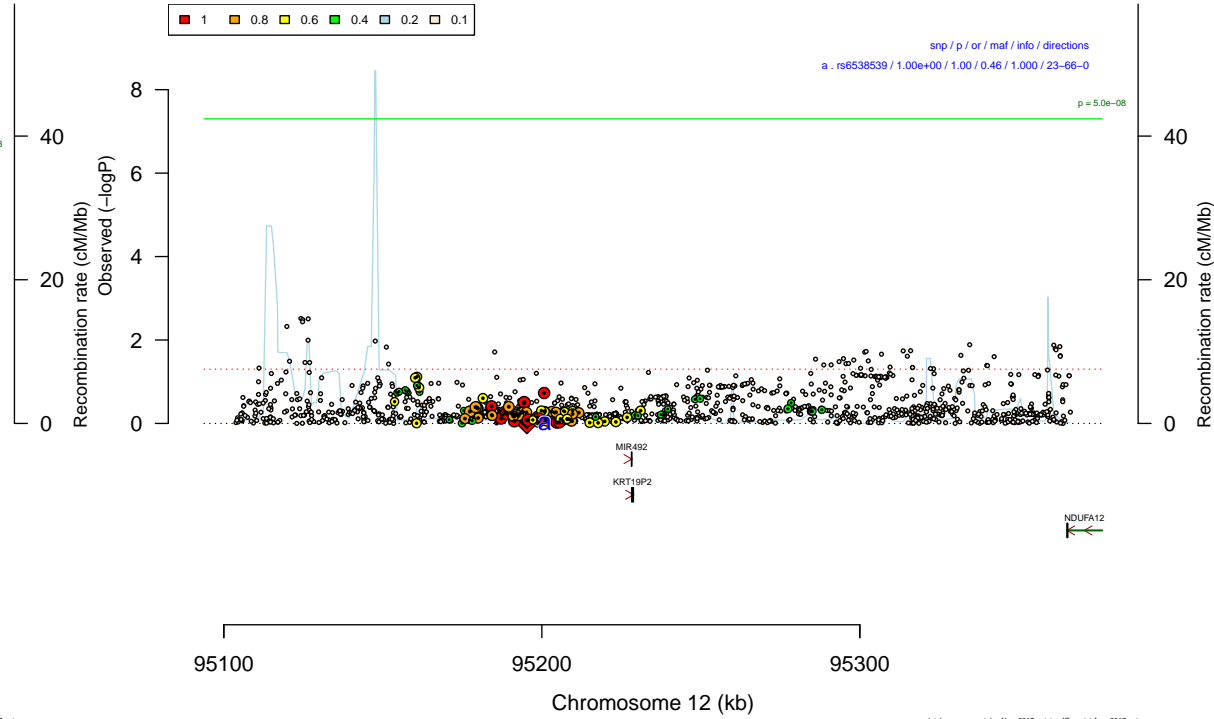

### SCZ\_uncond-rs1454606-chr4

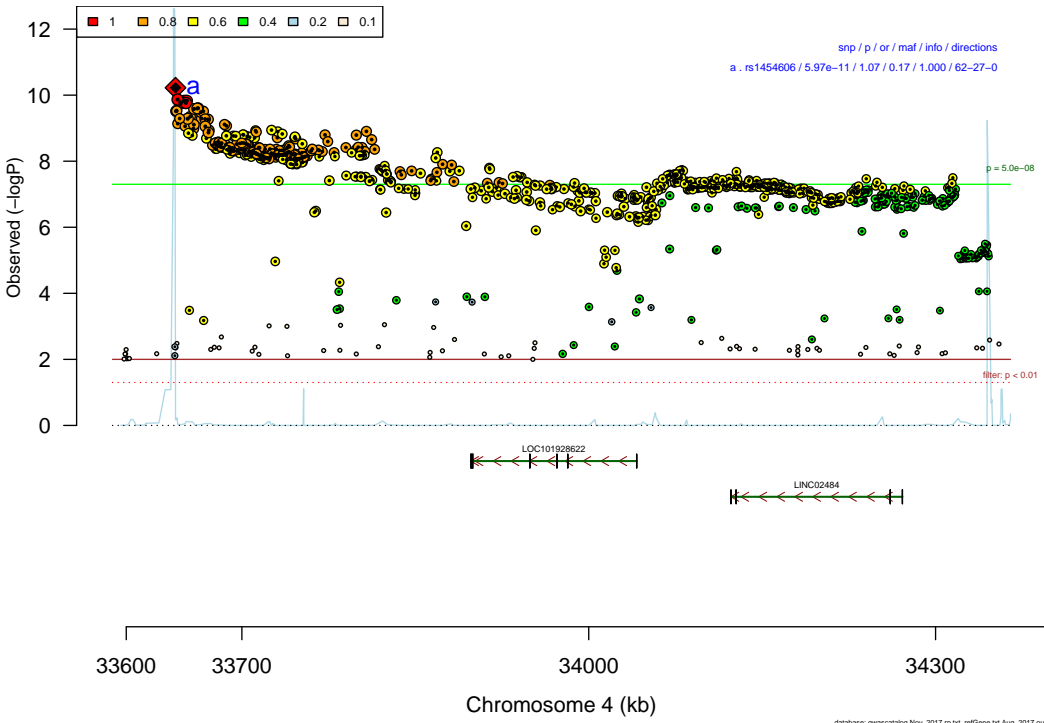

### SCZ\_cond\_rs1454606-chr4

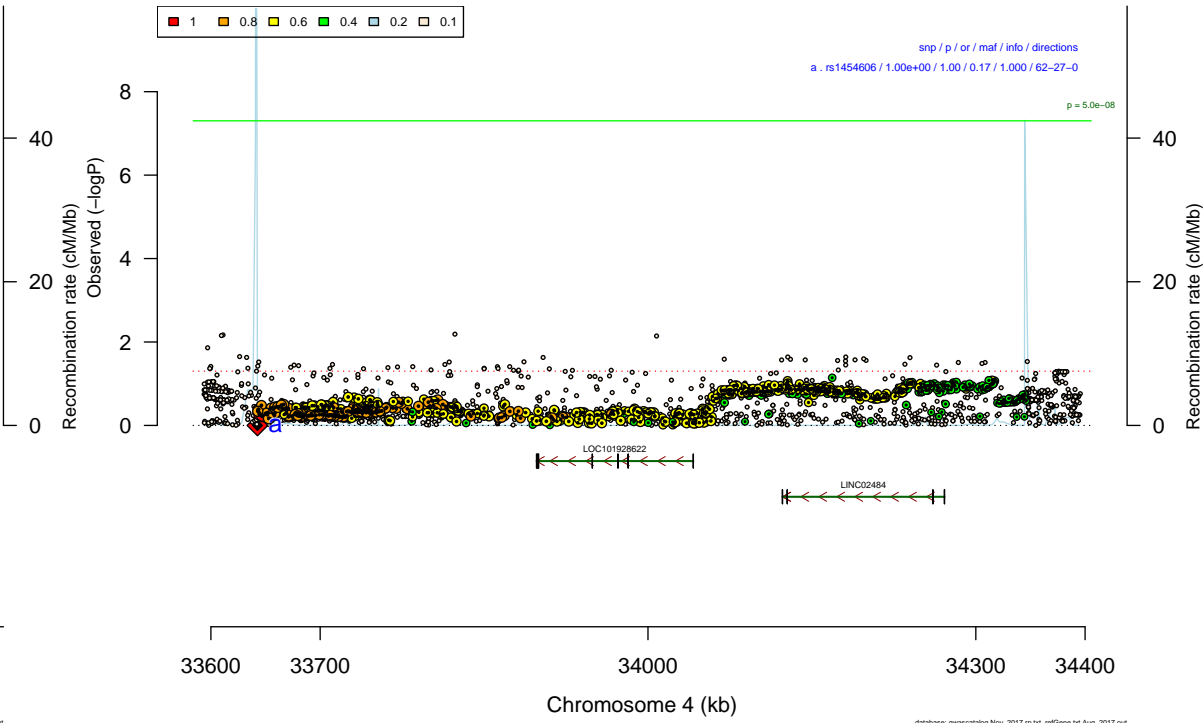

### SCZ\_uncond-rs11076631-chr16

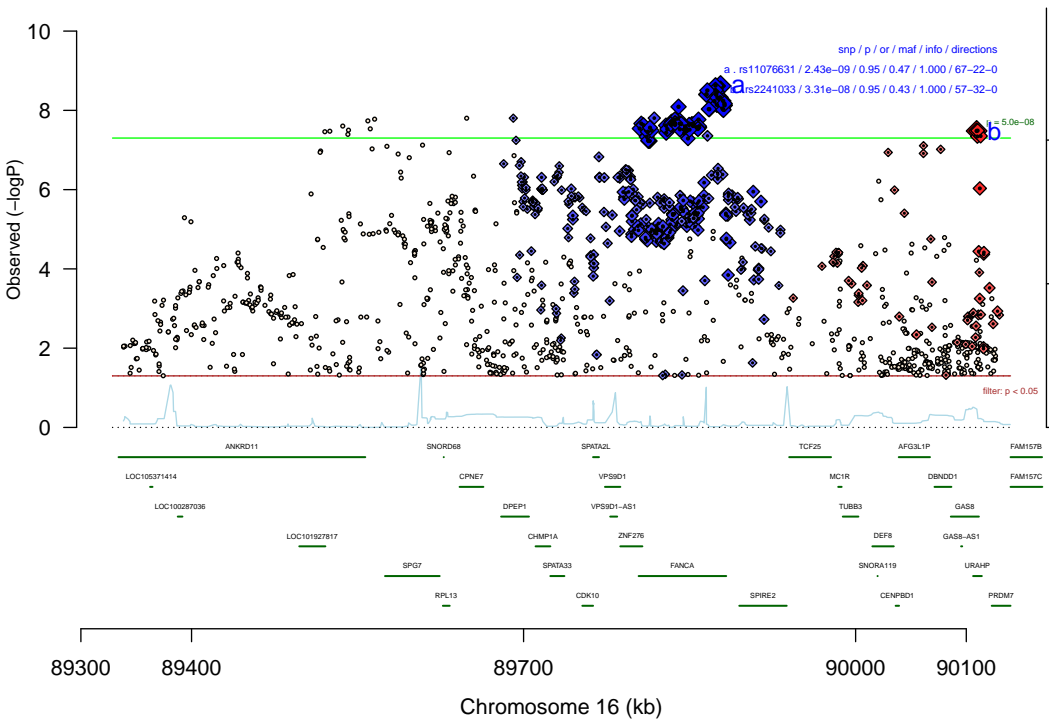

### SCZ\_cond\_rs11076631-chr16

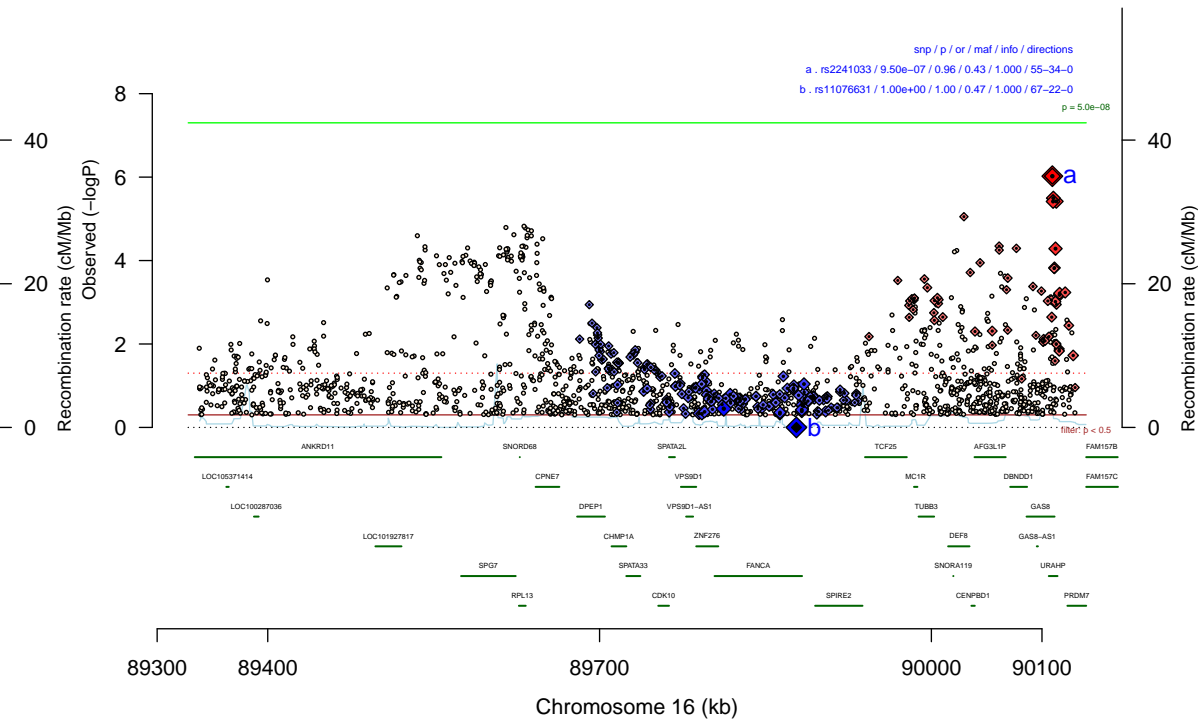

### SCZ\_cond\_rs11076631-rs2241033-chr16

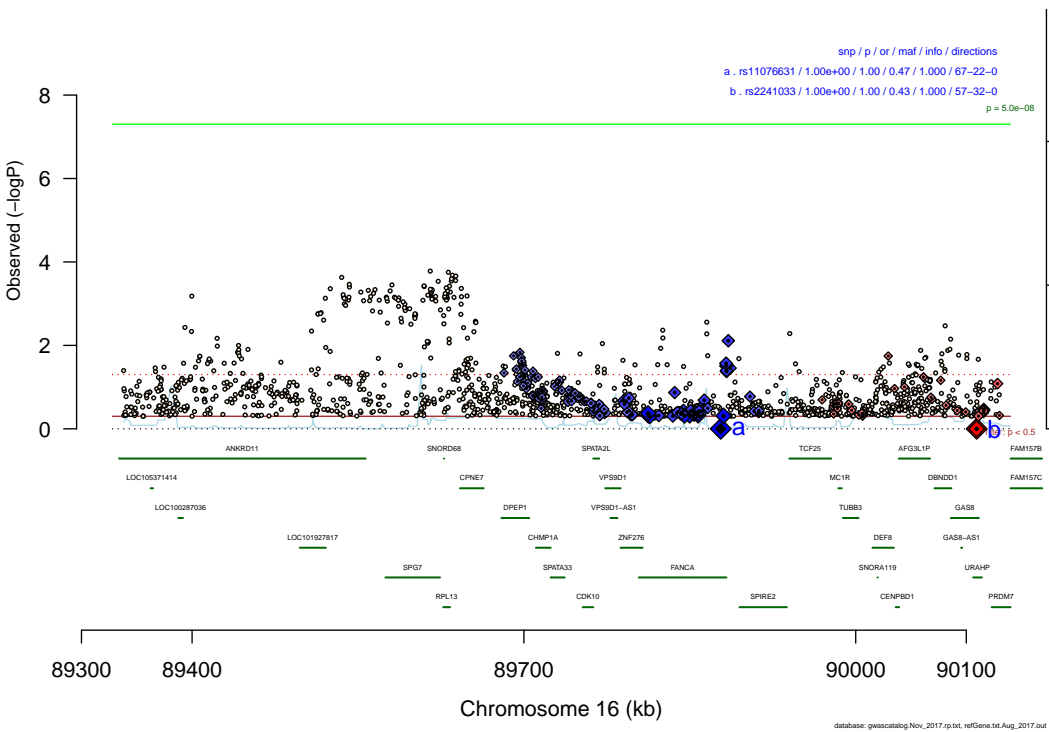

### SCZ\_uncond-rs7938083-chr11

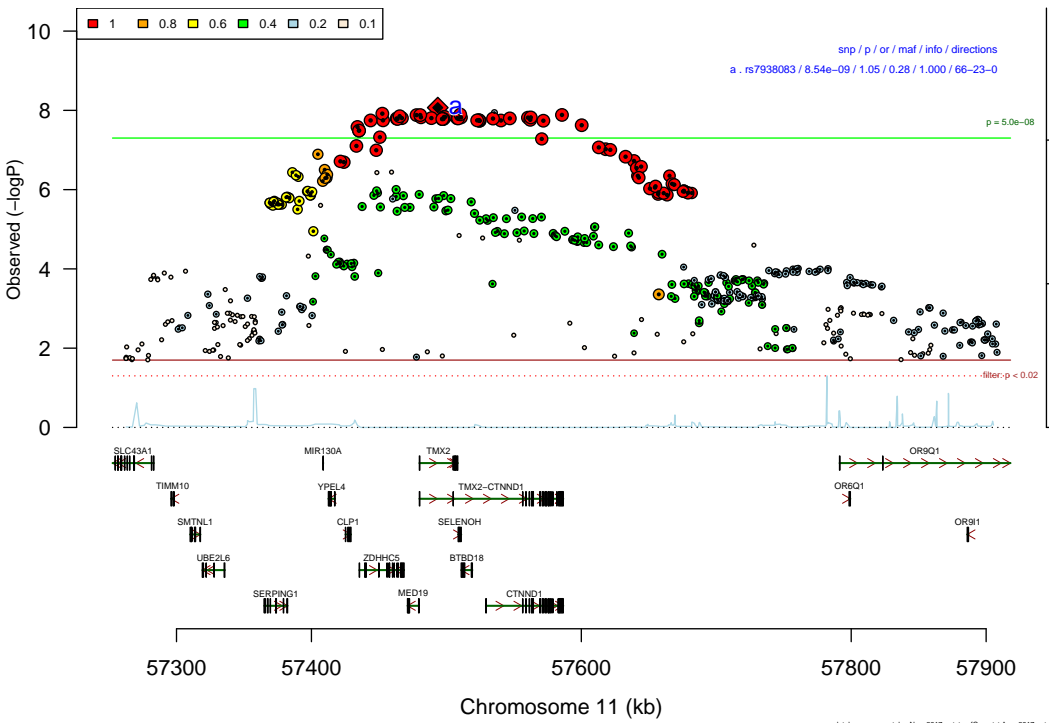

### SCZ\_cond\_rs7938083-chr11

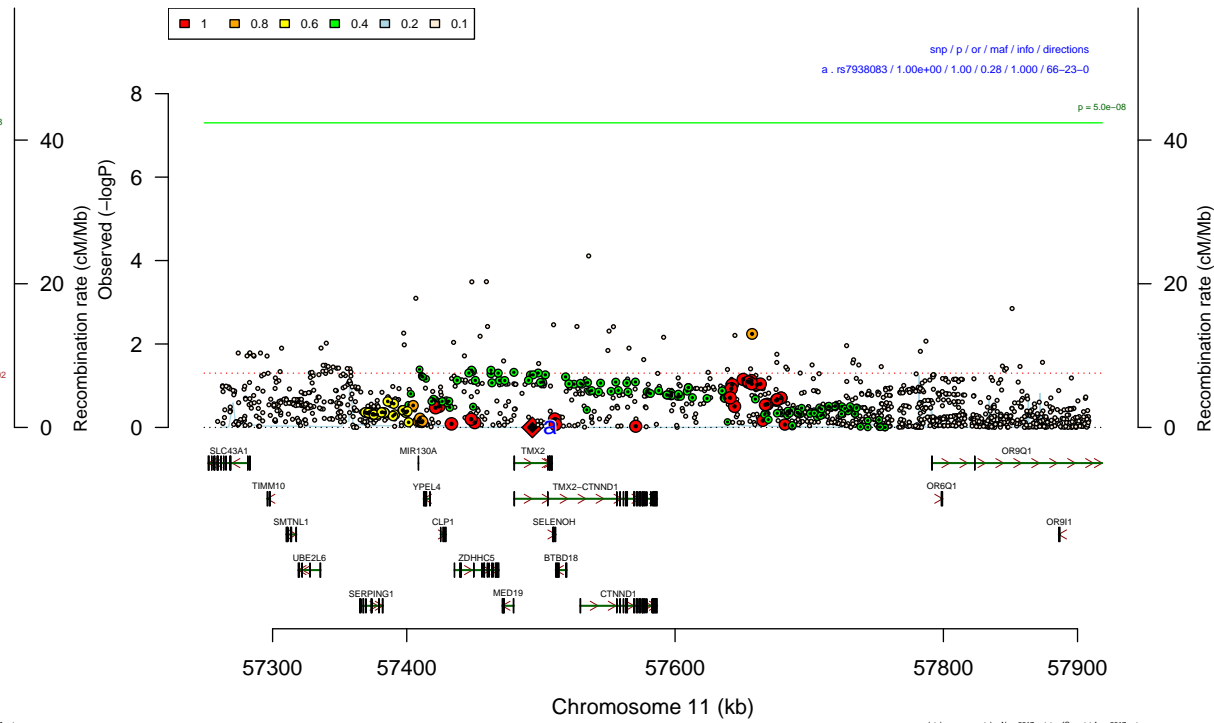

### SCZ\_uncond-rs143116451-chr12

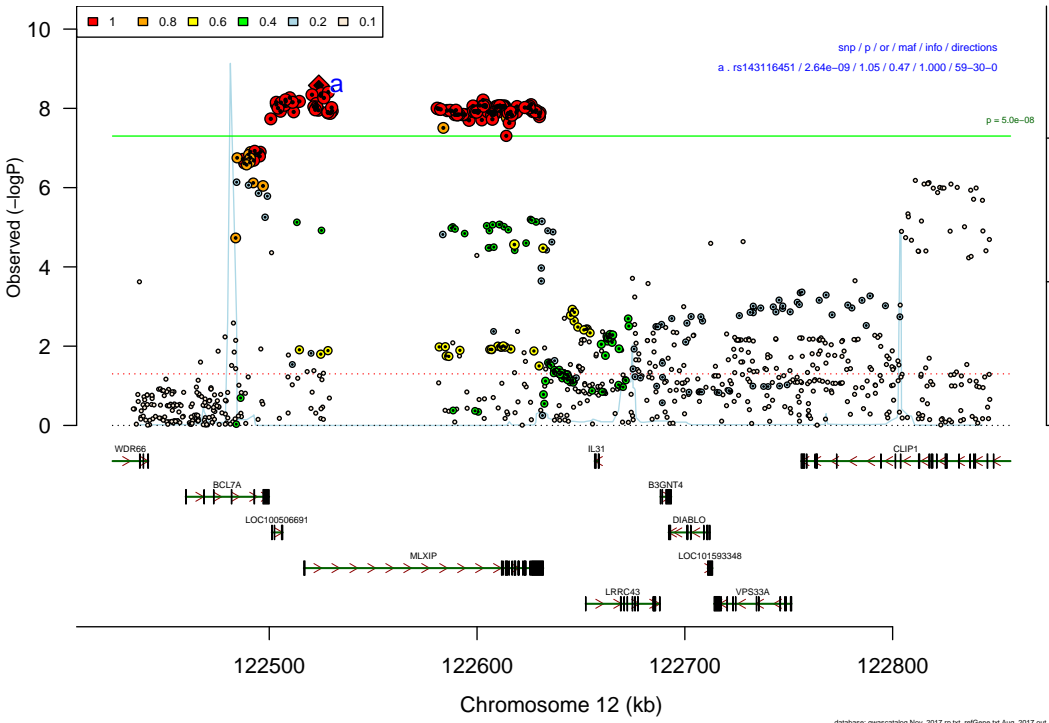

### SCZ\_cond\_rs143116451-chr12

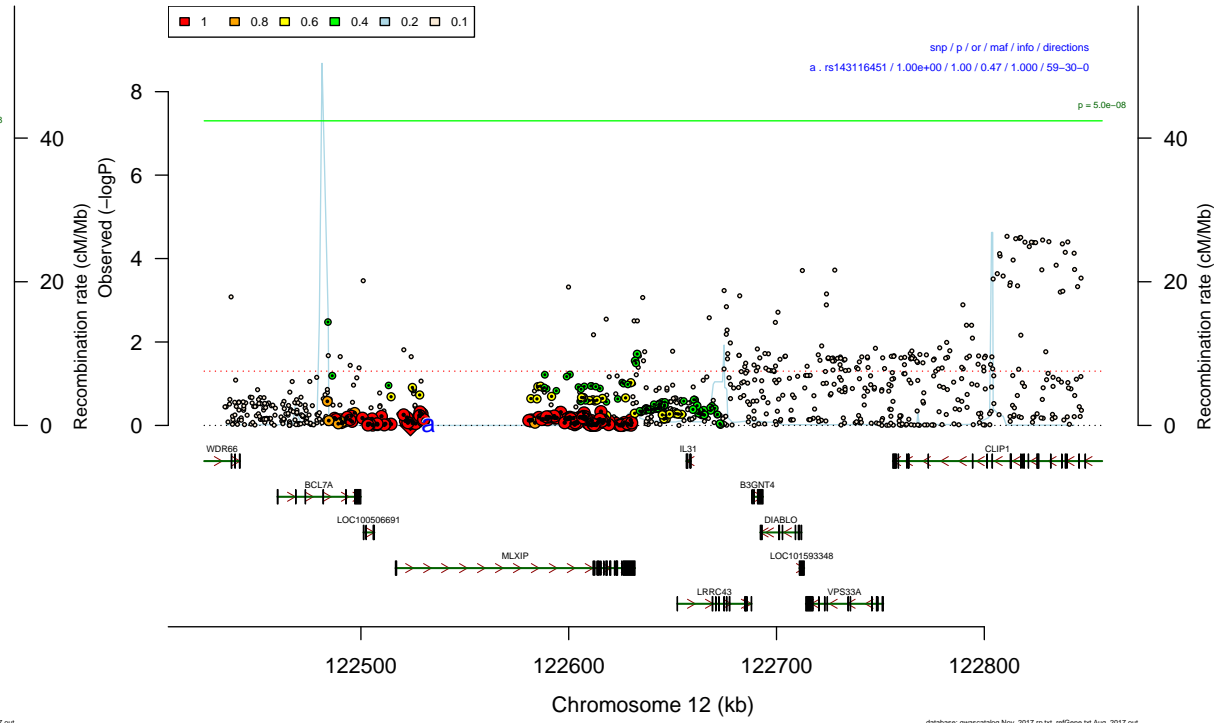

### SCZ\_uncond-rs3752827-chr17

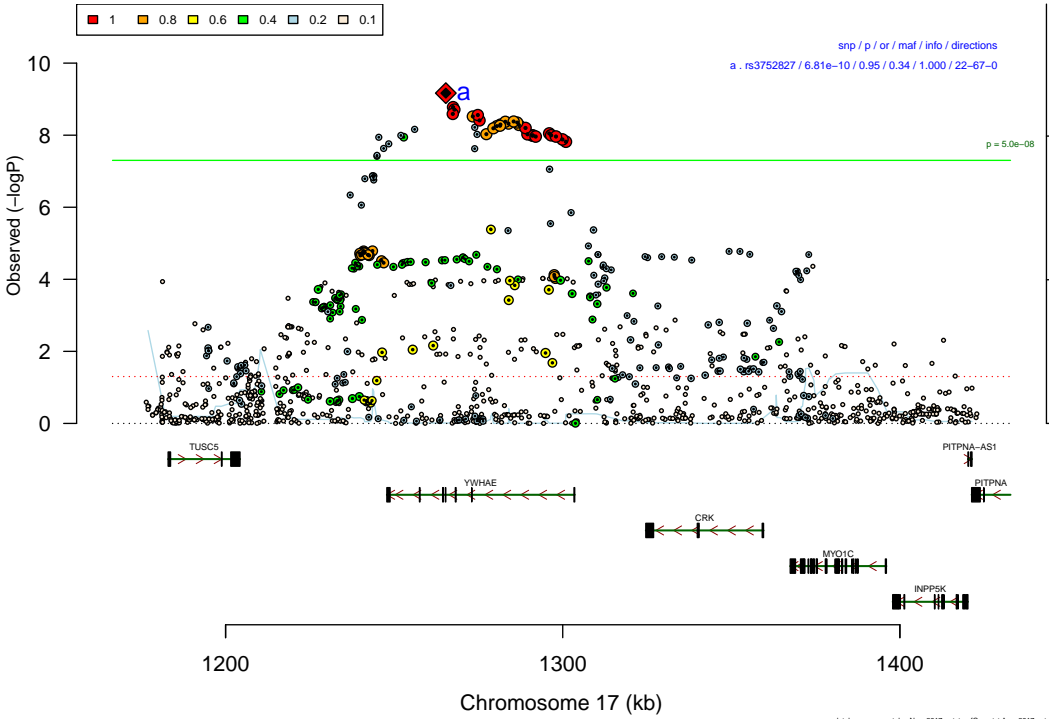

### SCZ\_cond\_rs3752827-chr17

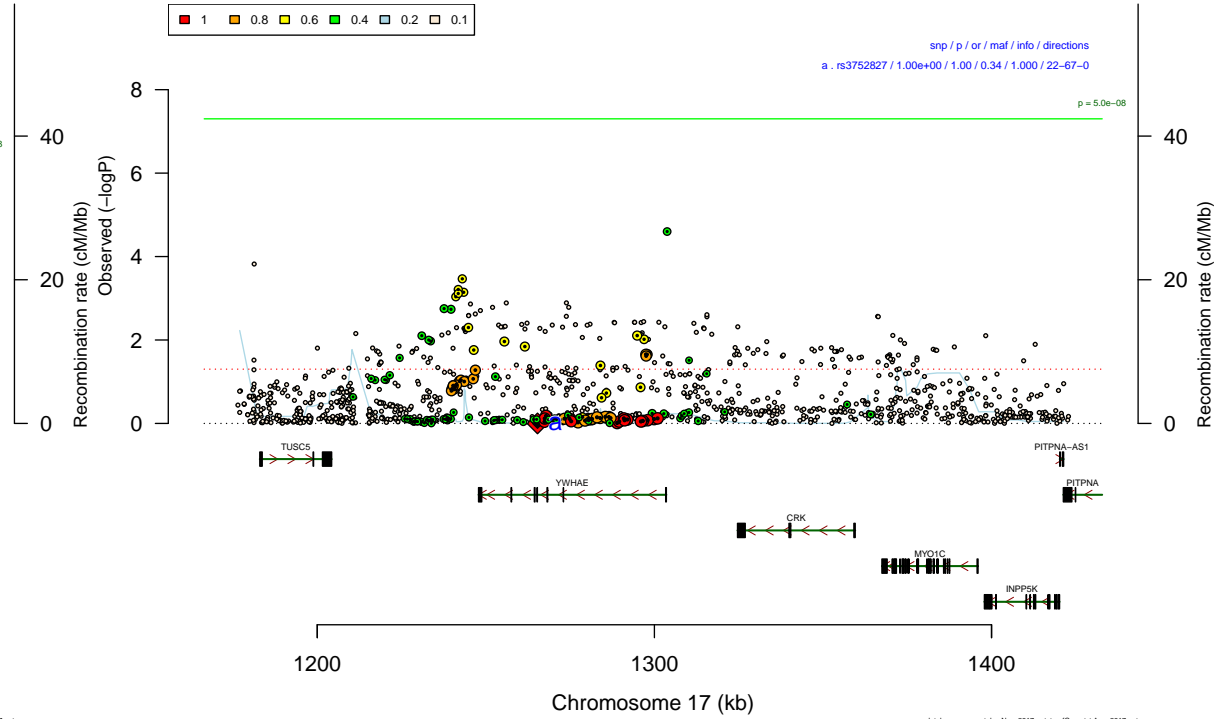

### SCZ\_uncond-rs1924377-chr13

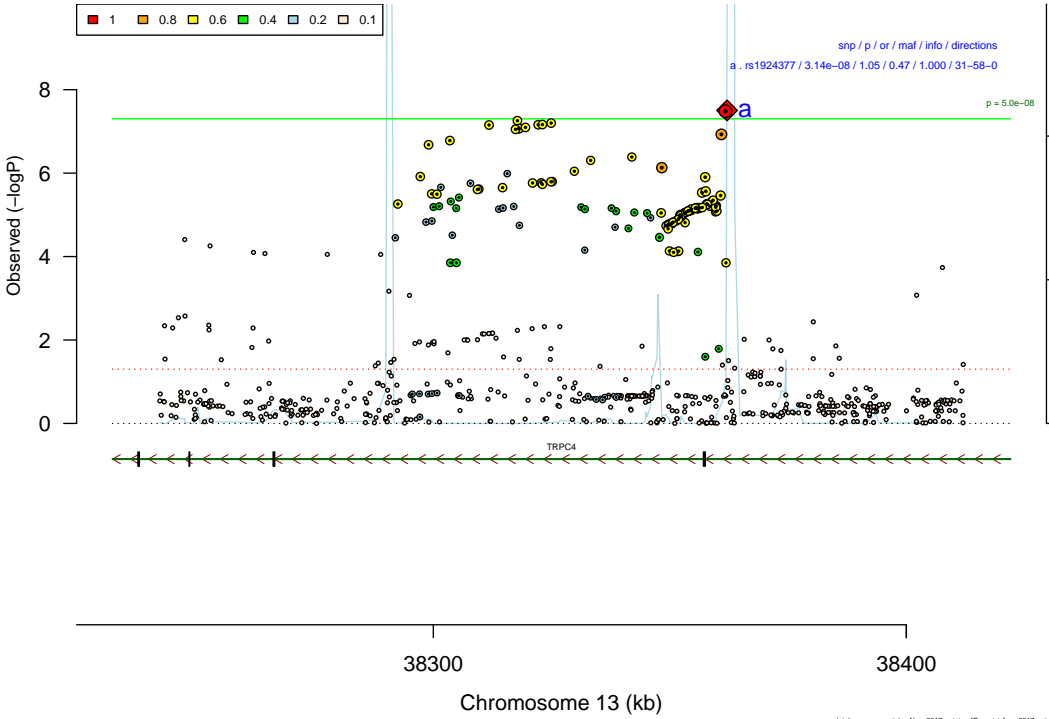

### SCZ\_cond\_rs1924377-chr13

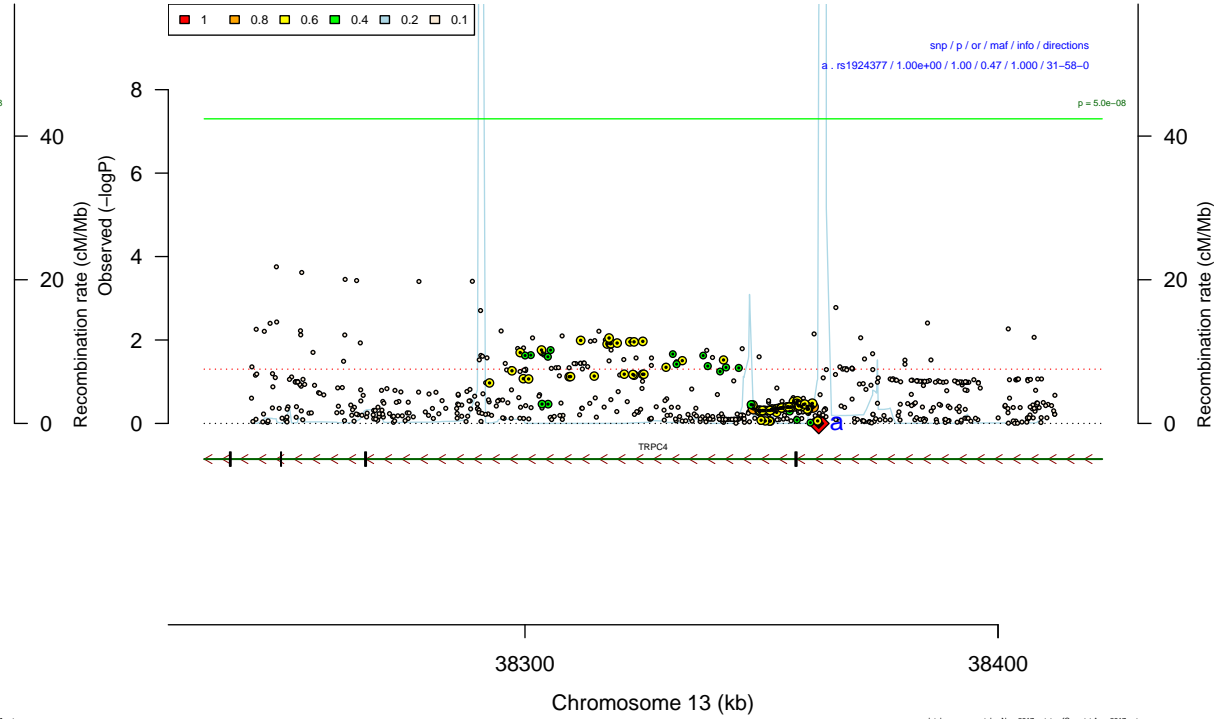

### SCZ\_uncond-rs6984242-chr8

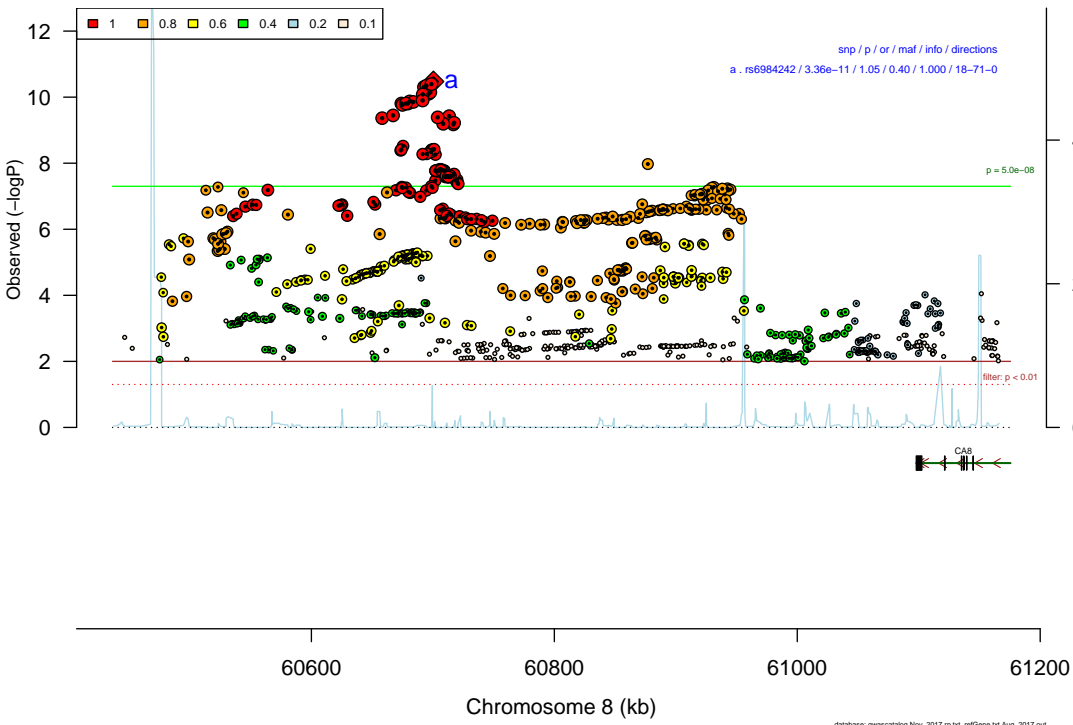

### SCZ\_cond\_rs6984242-chr8

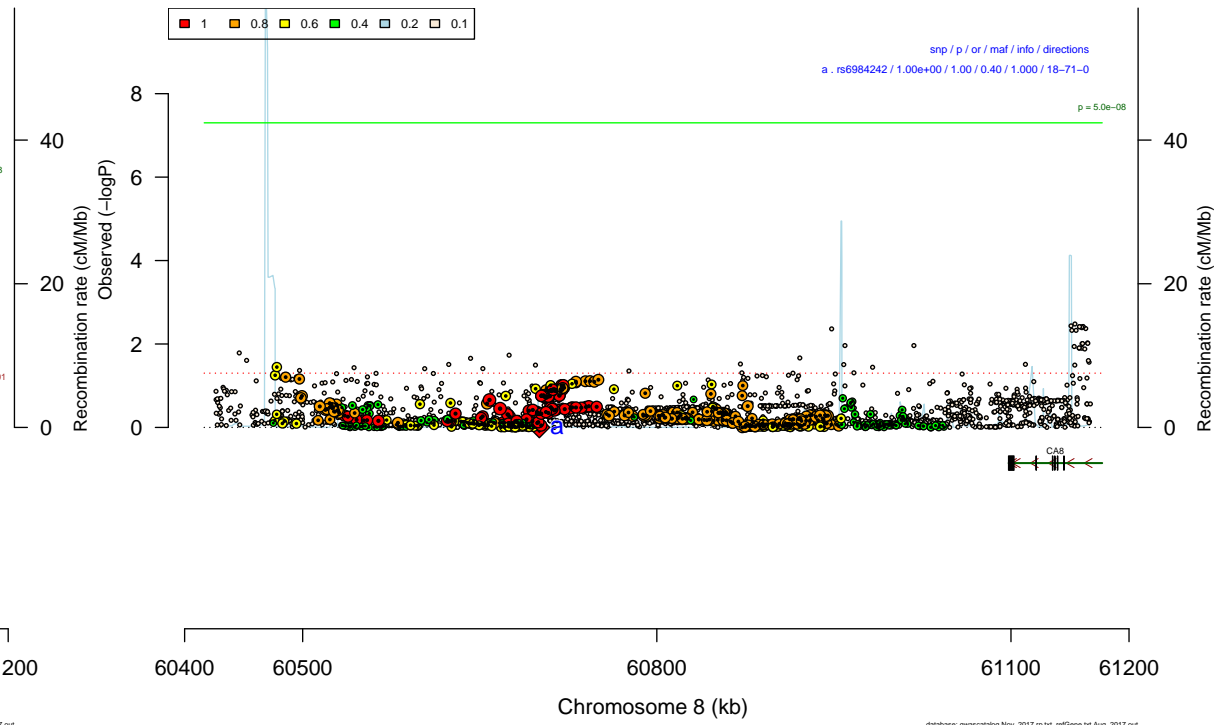



### SCZ\_uncond-rs2387414-chr19

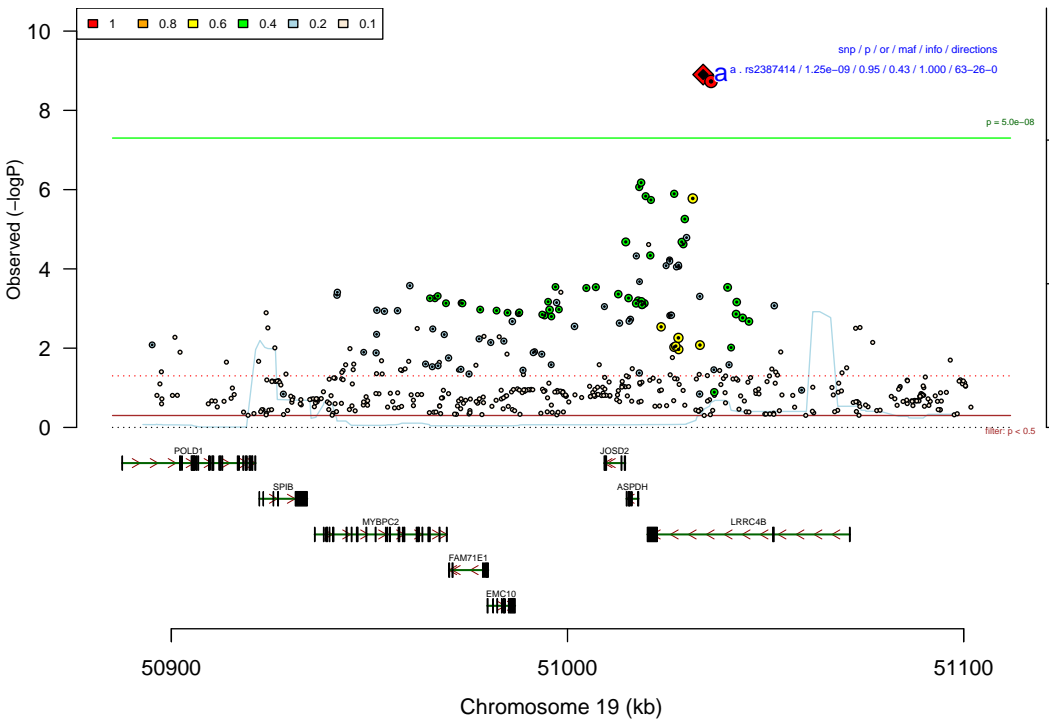

### SCZ\_cond\_rs2387414-chr19

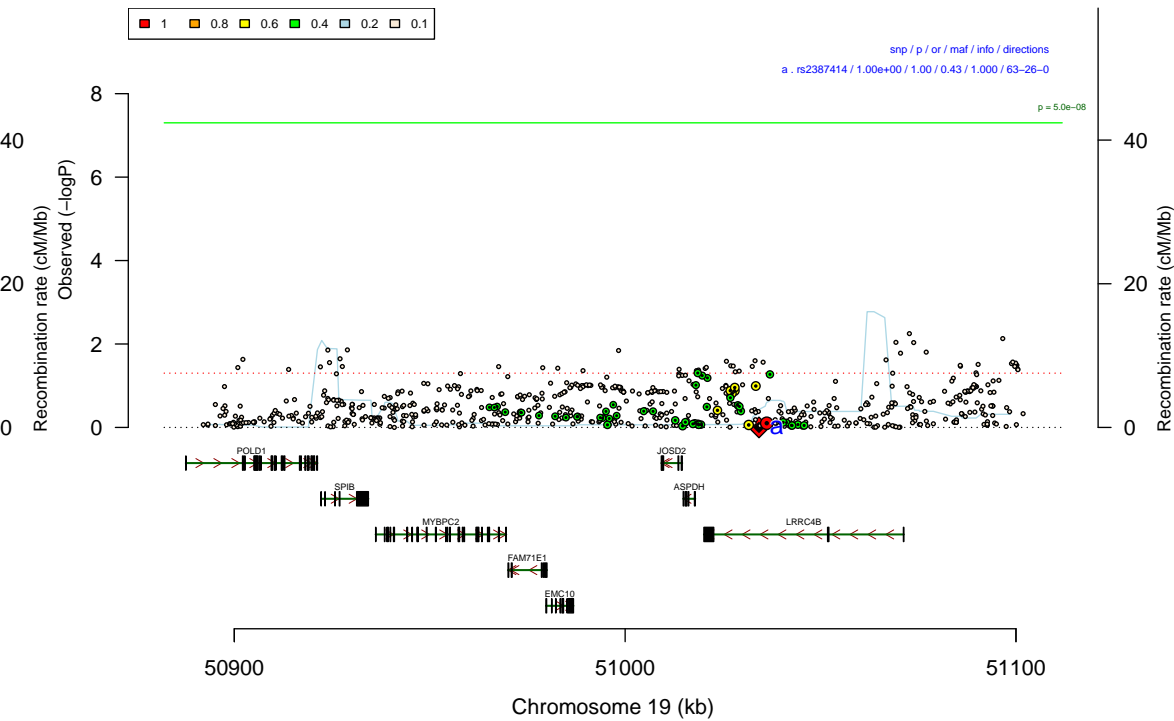

### SCZ\_uncond-rs581459-chr1

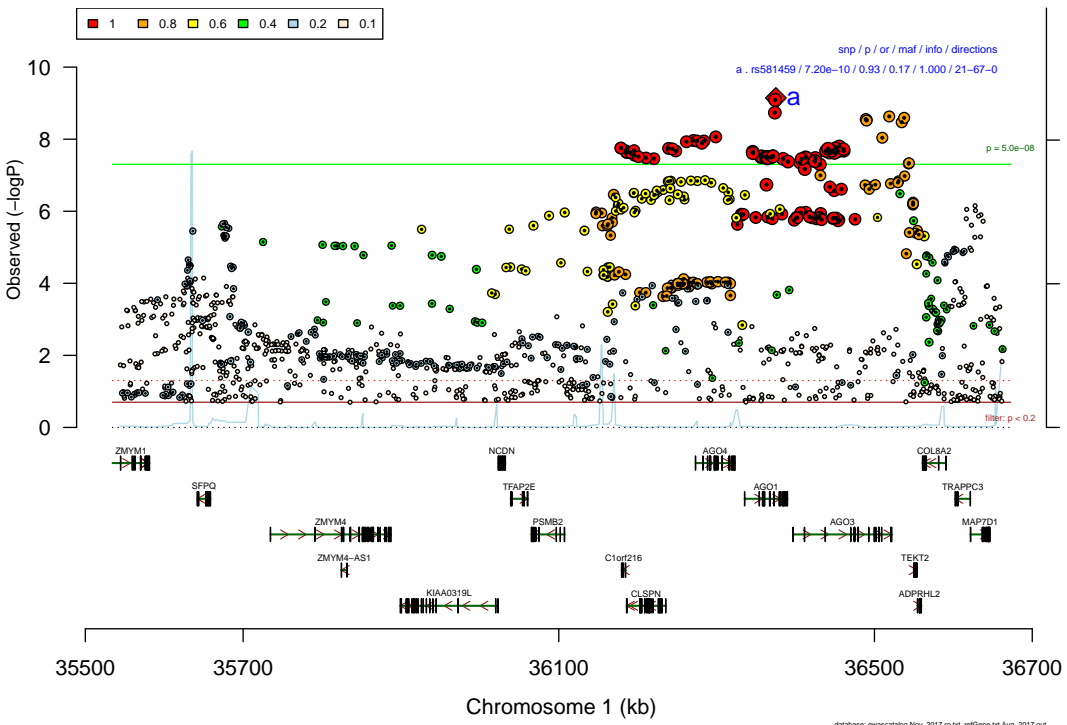

### SCZ\_cond\_rs581459-chr1

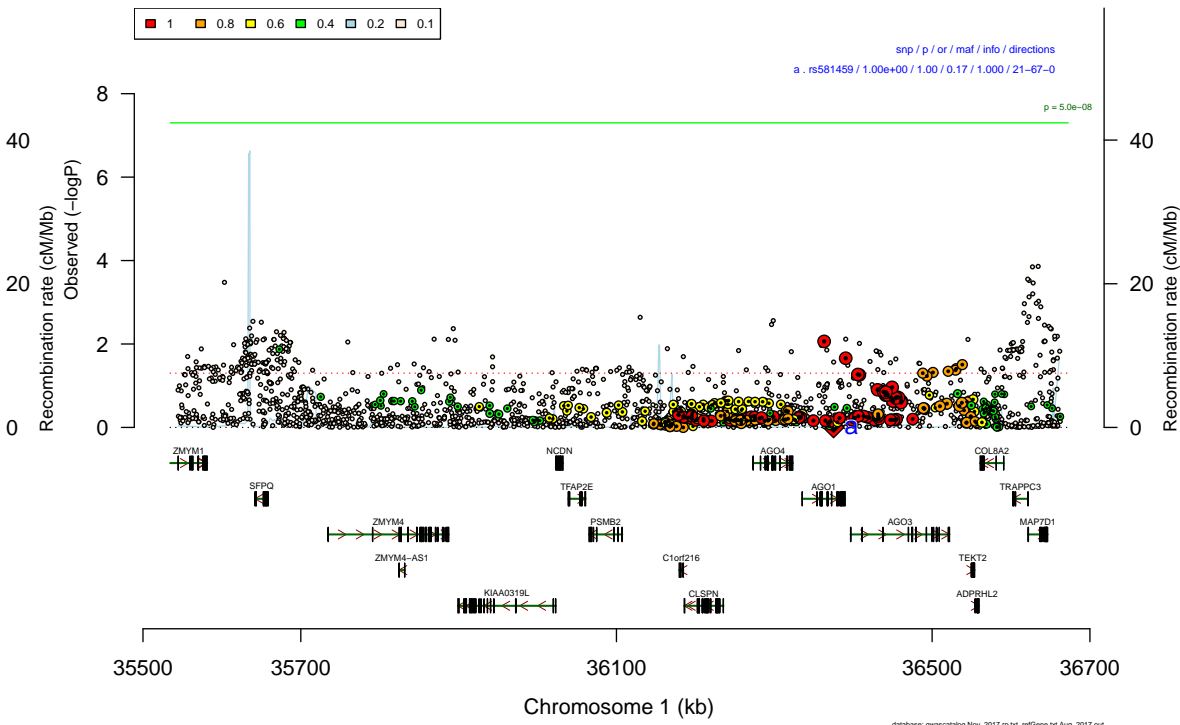

### SCZ\_uncond-rs10086619-chr8

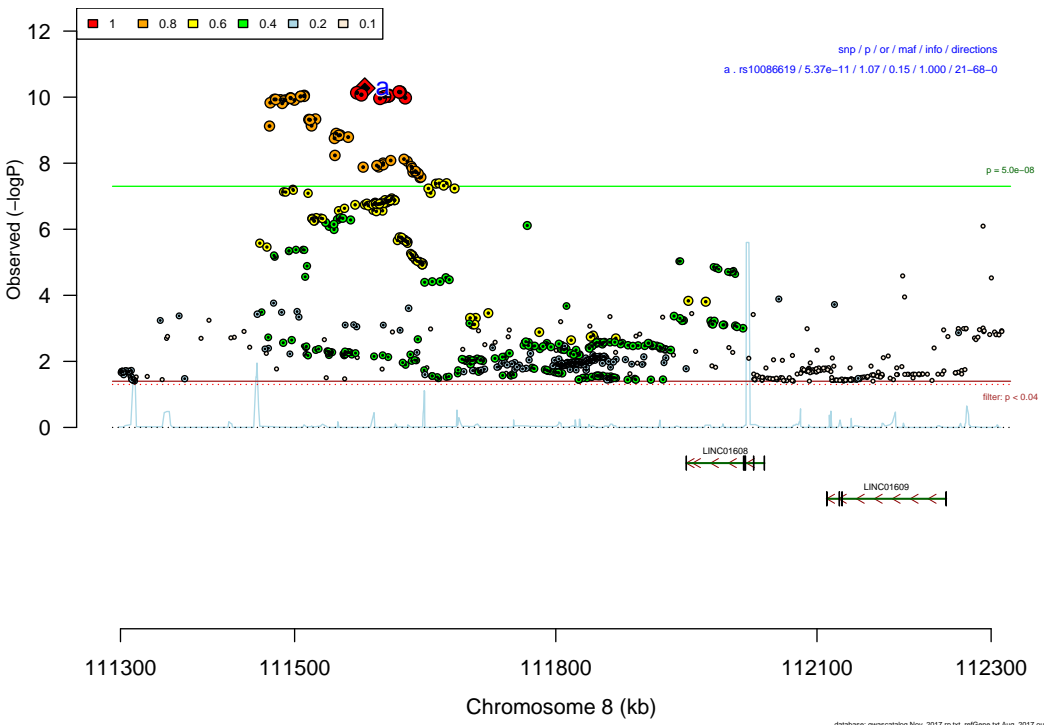

### SCZ\_cond\_rs10086619-chr8

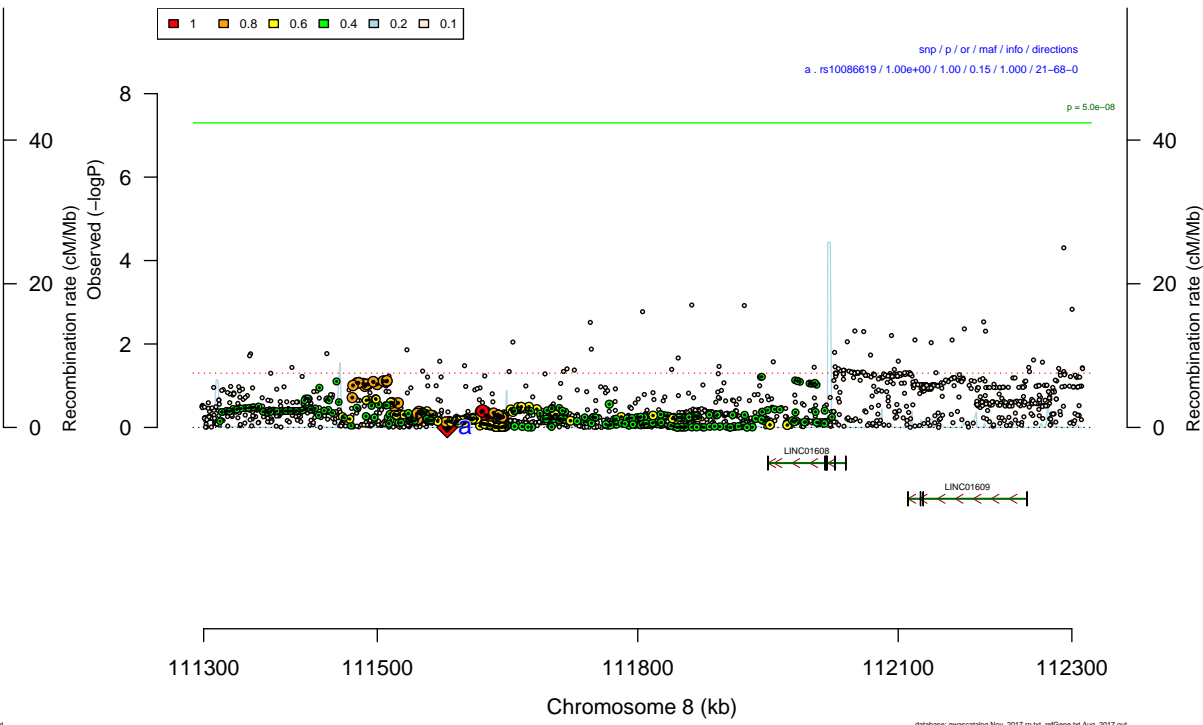

### SCZ\_uncond-rs6588168-chr1

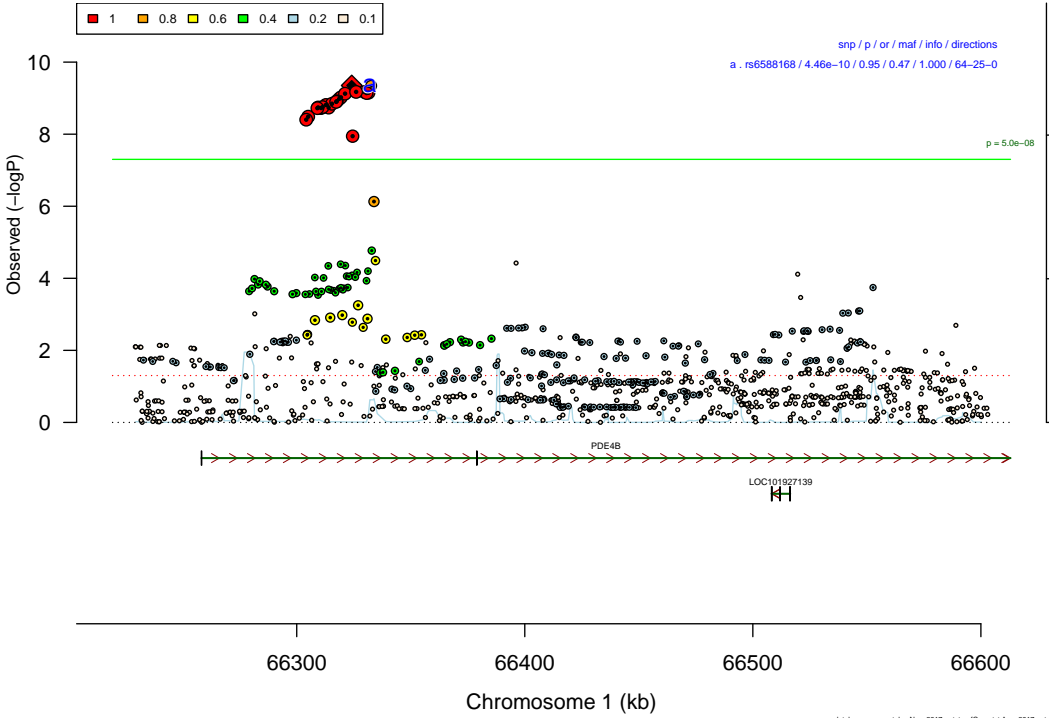

### SCZ\_cond\_rs6588168-chr1

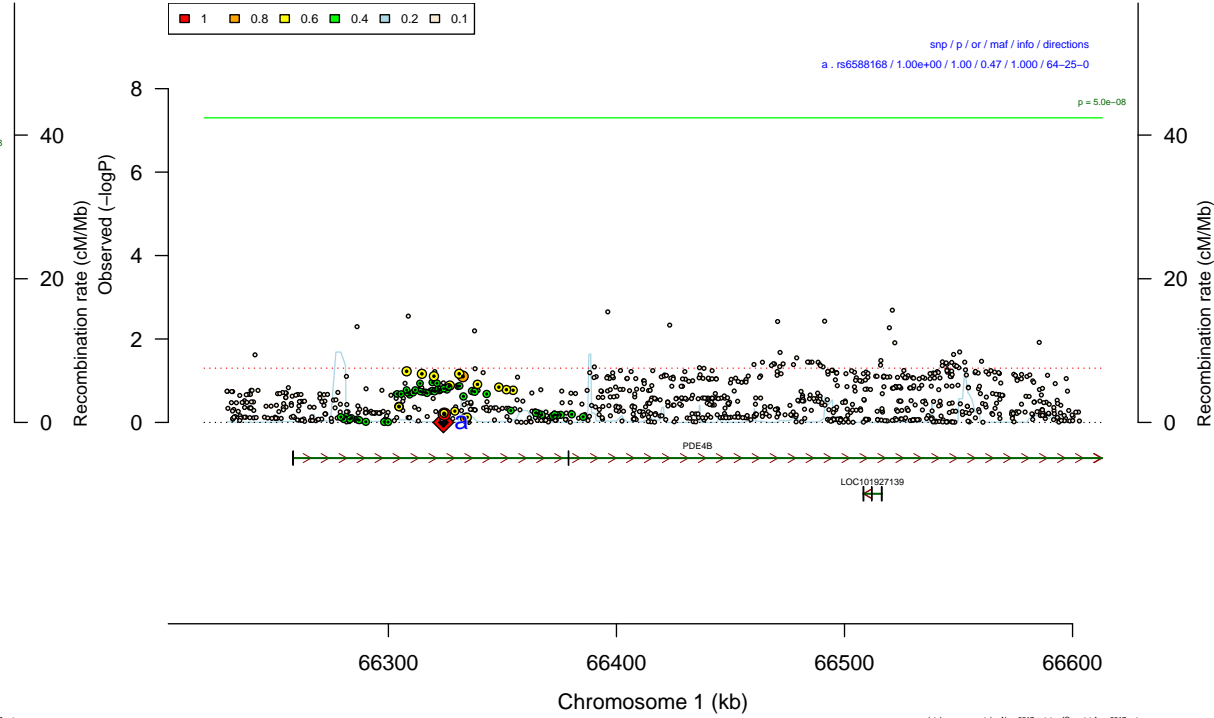

### SCZ\_uncond-rs17571951-chr14

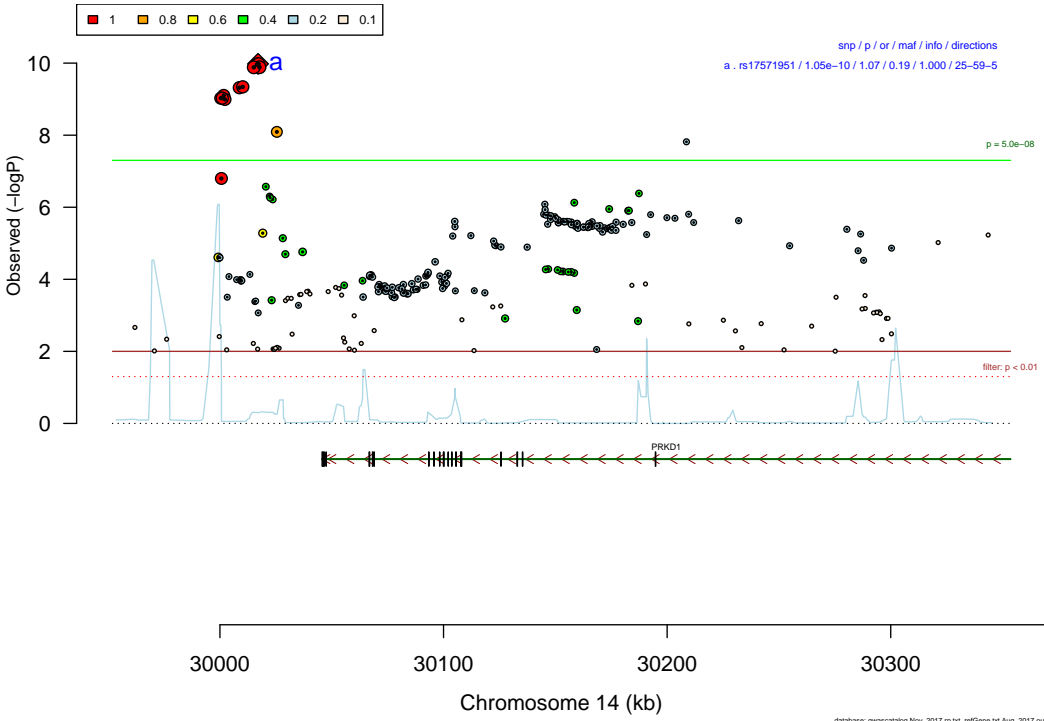

### SCZ\_cond\_rs17571951-chr14

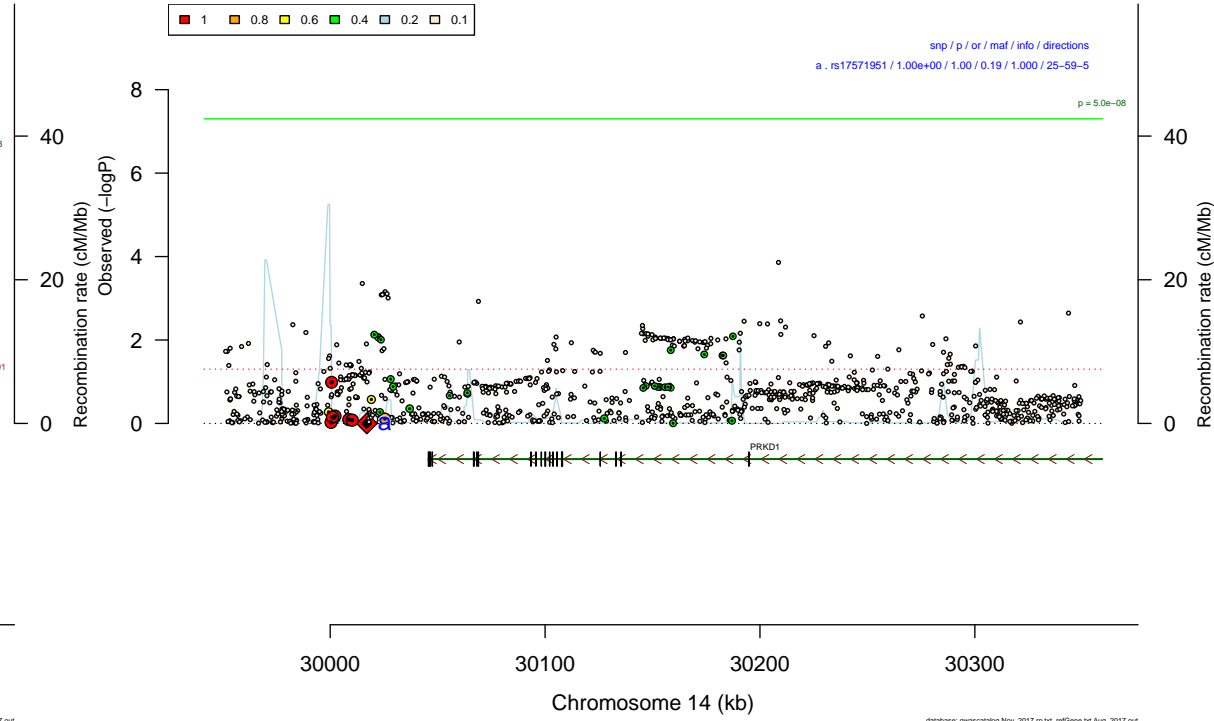

### SCZ\_uncond-rs8175378-chr5

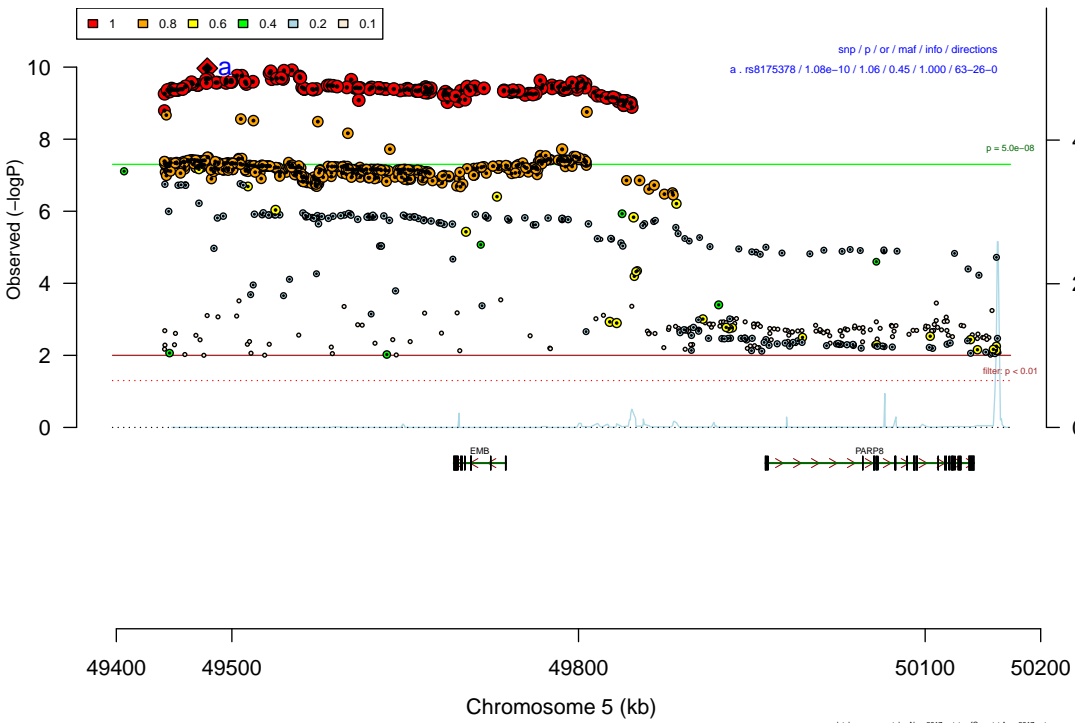

### SCZ\_cond\_rs8175378-chr5

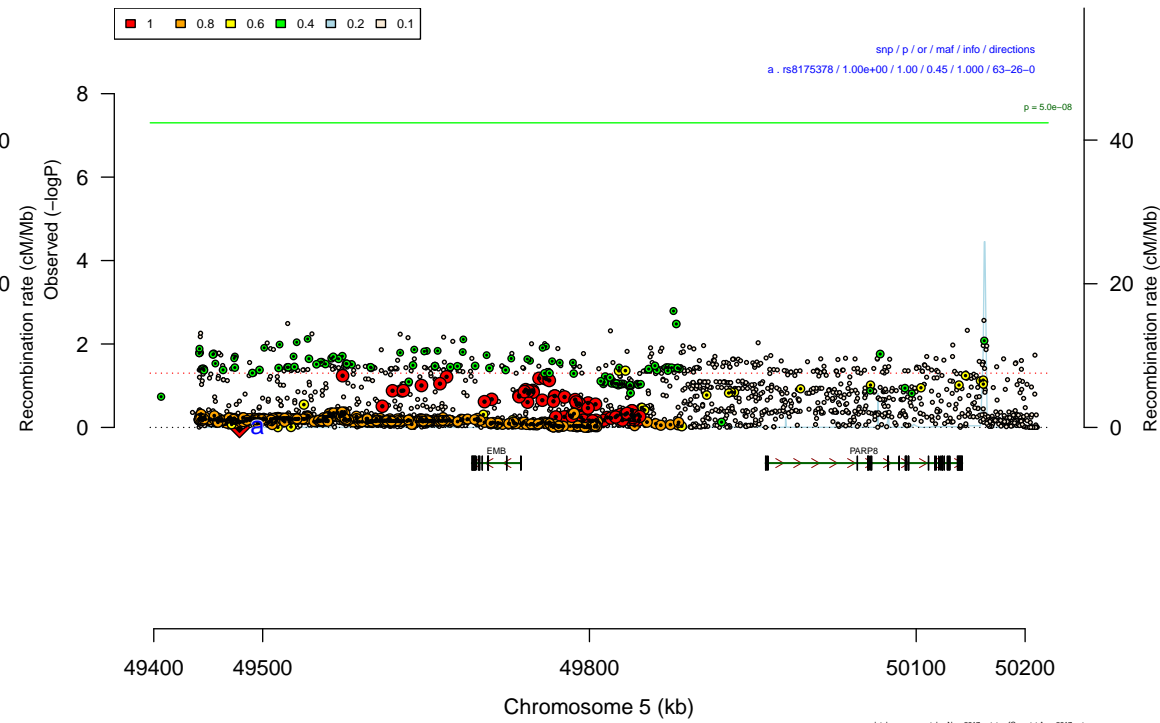

### SCZ\_uncond-rs1121296-chr1

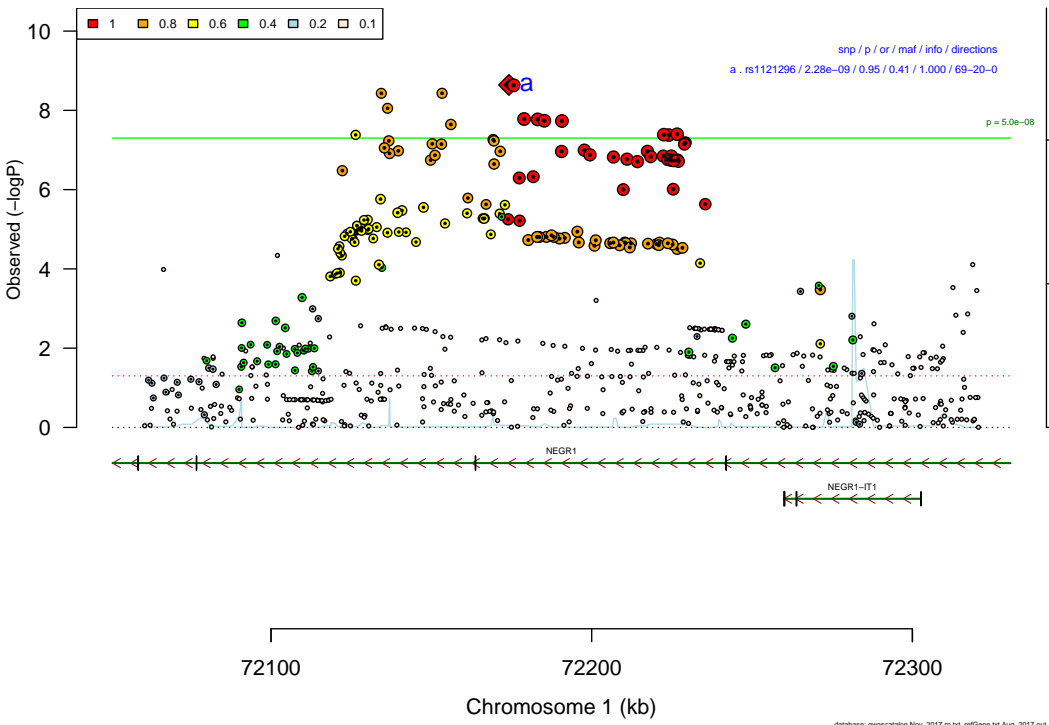

### SCZ\_cond\_rs1121296-chr1

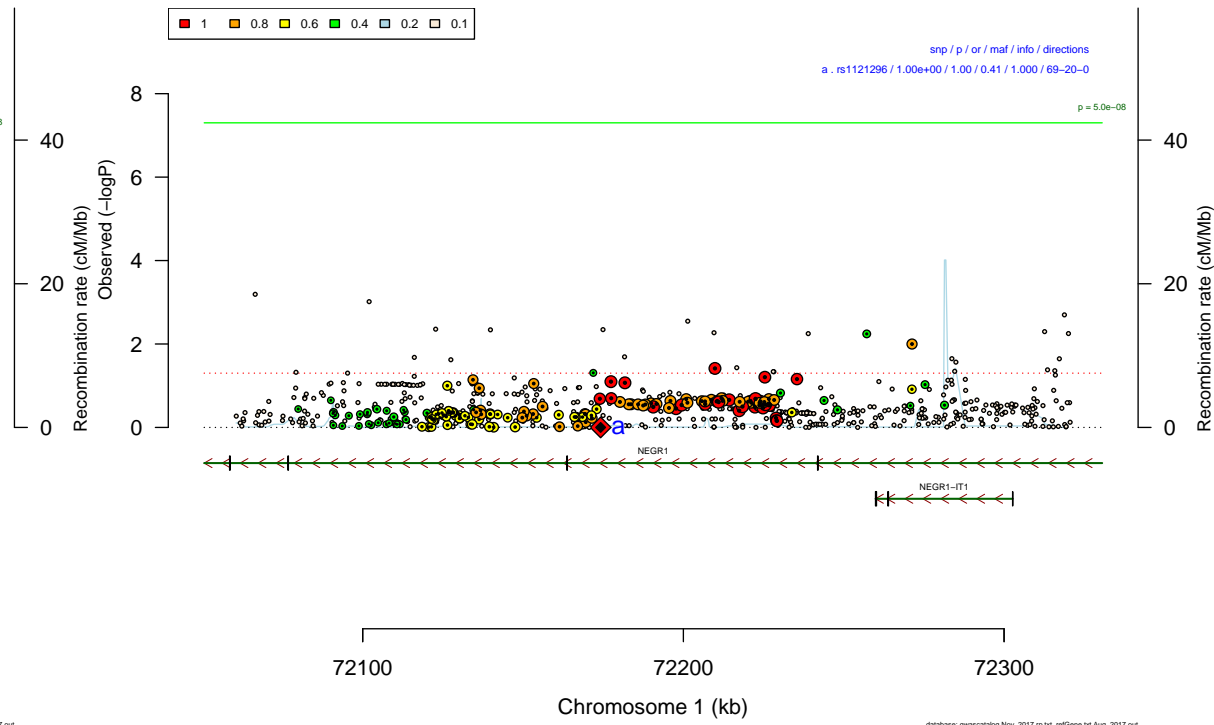

### SCZ\_uncond-rs6504163-chr17

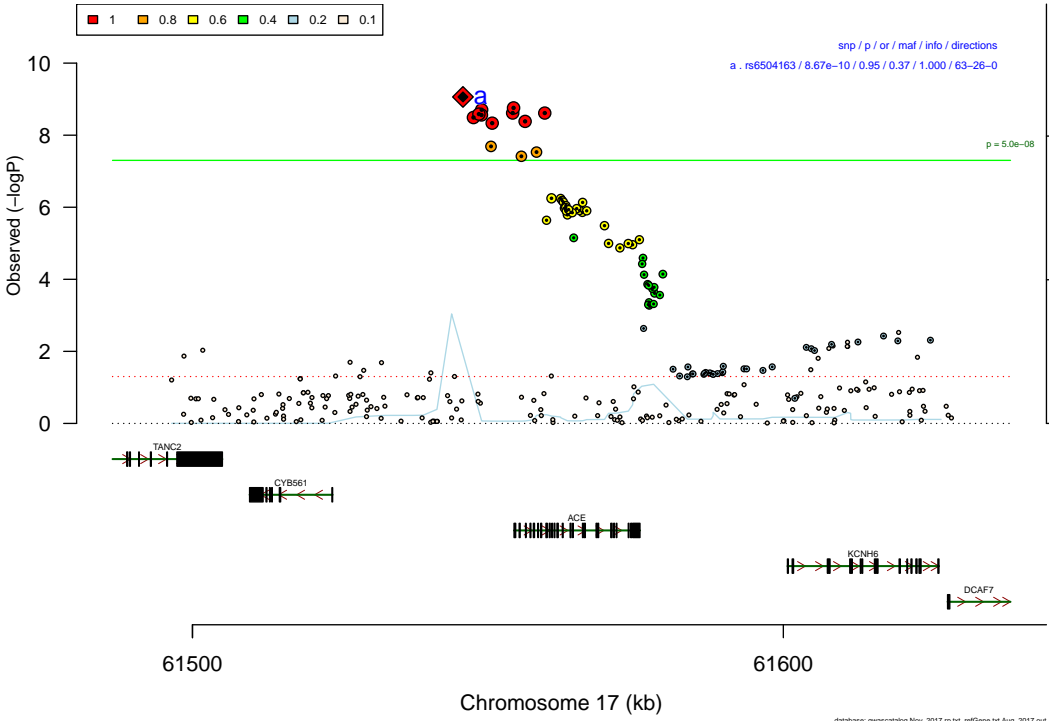

### SCZ\_cond\_rs6504163-chr17

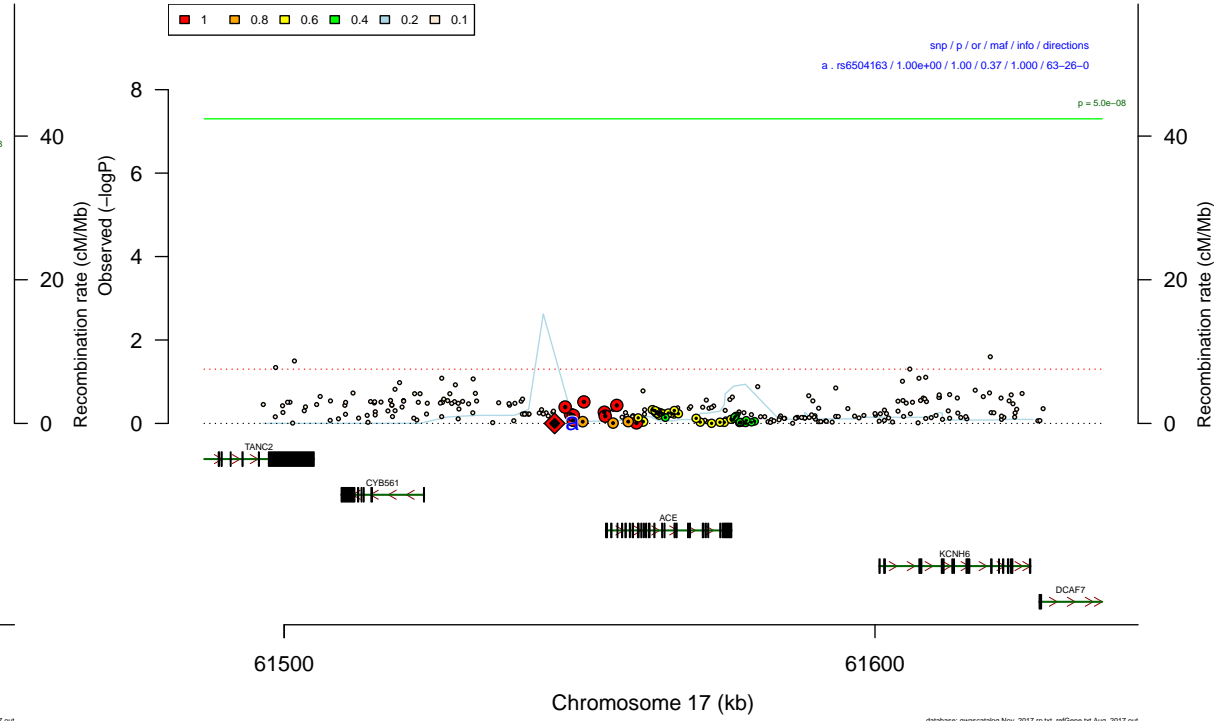



### SCZ\_uncond-rs10069930-chr5

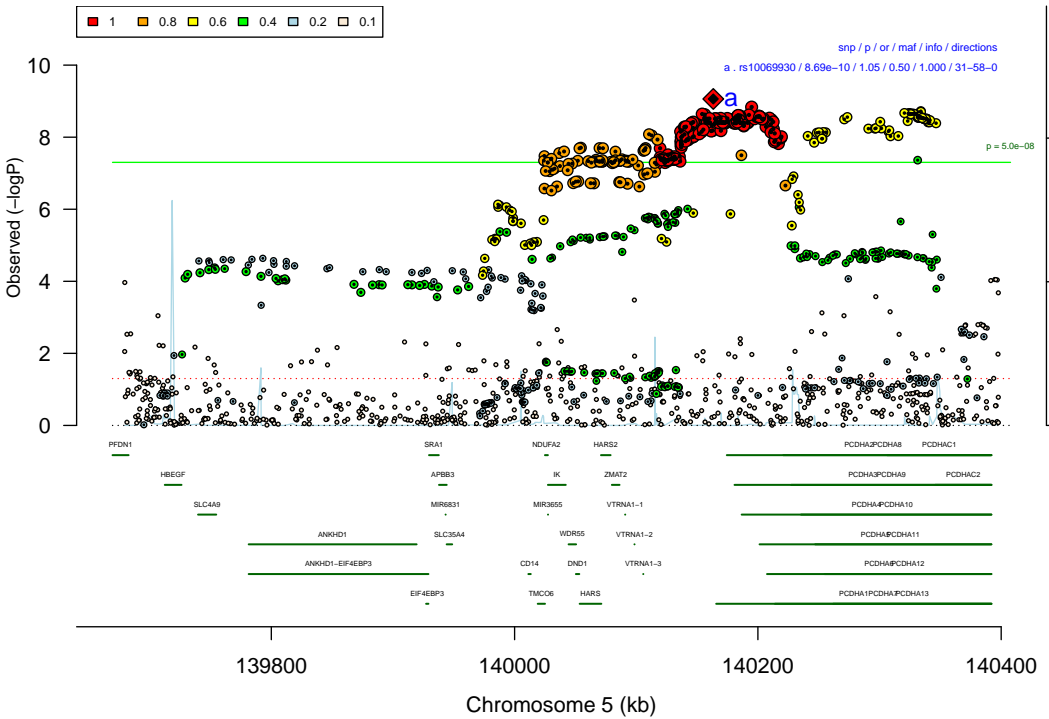

### SCZ\_cond\_rs10069930-chr5

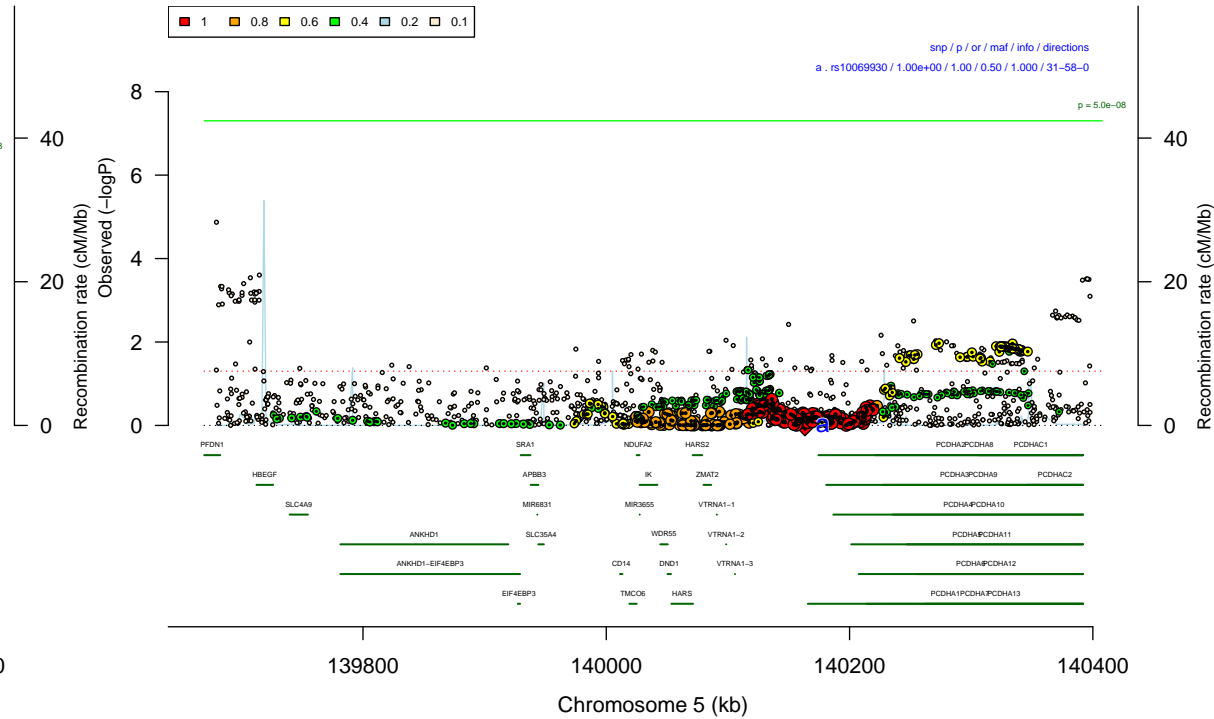

### SCZ\_uncond-rs167924-chr3

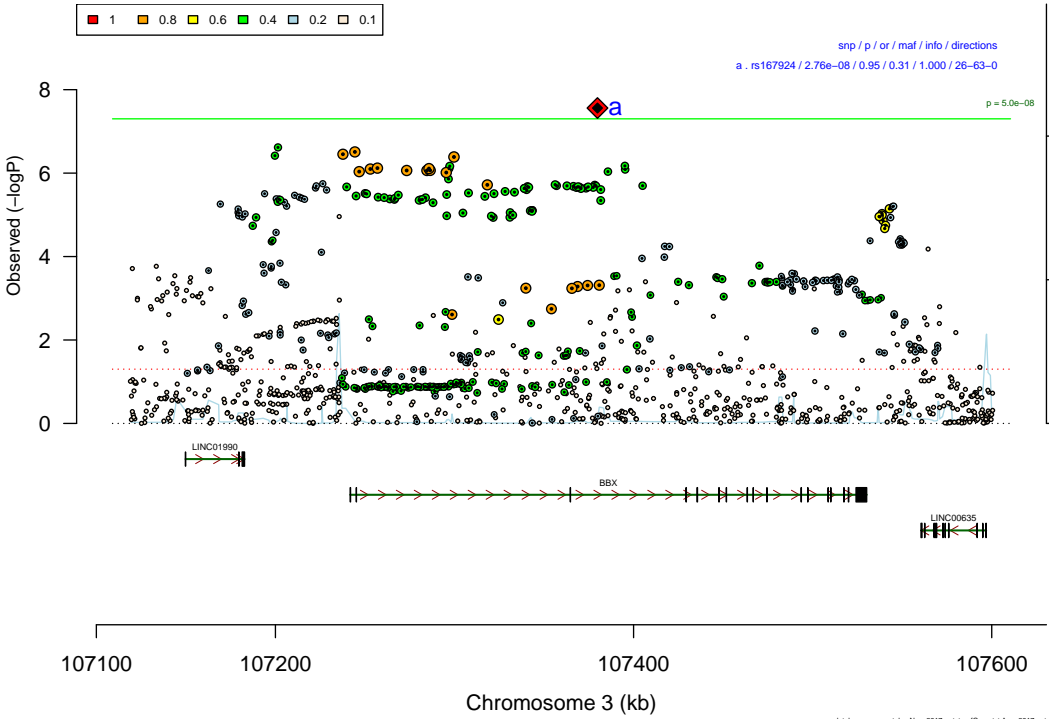

### SCZ\_cond\_rs167924-chr3

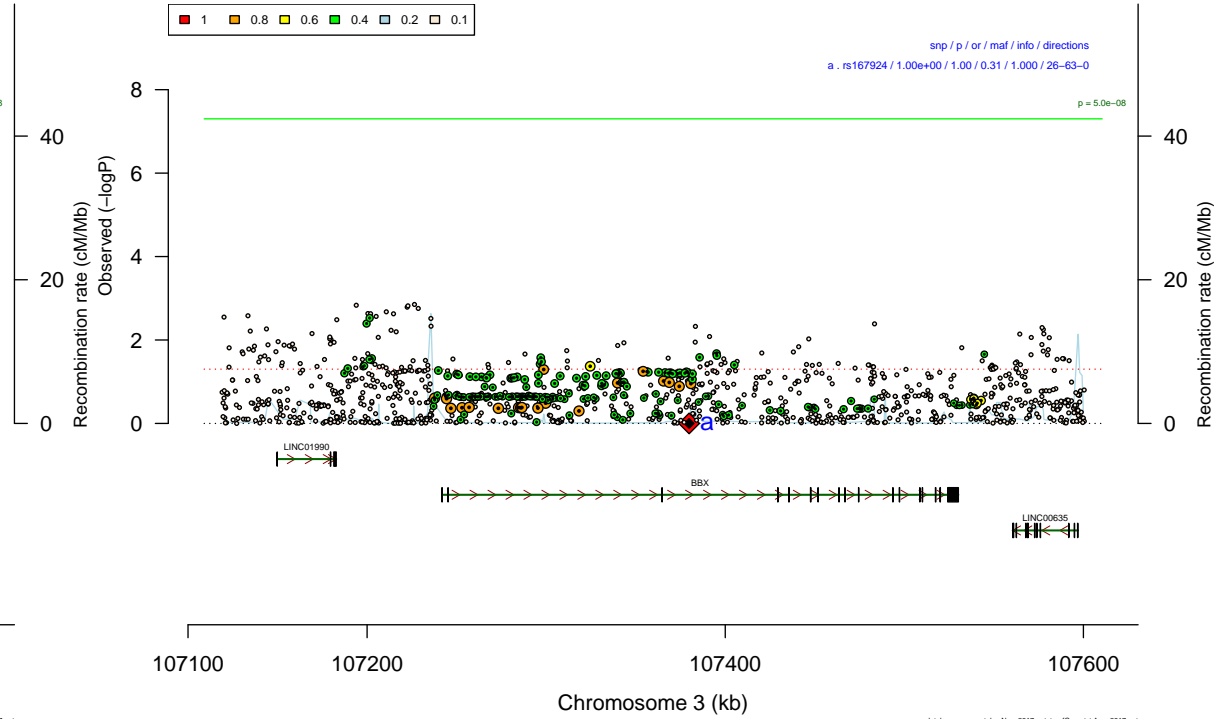

### SCZ\_uncond-rs72986630-chr19

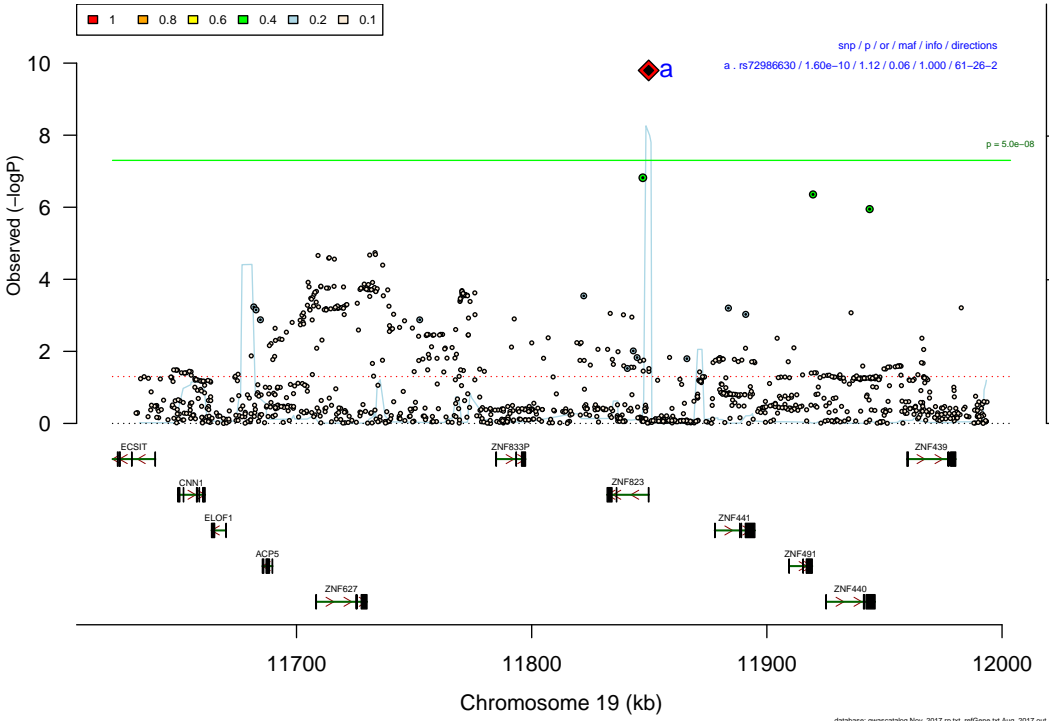

### SCZ\_cond\_rs72986630-chr19

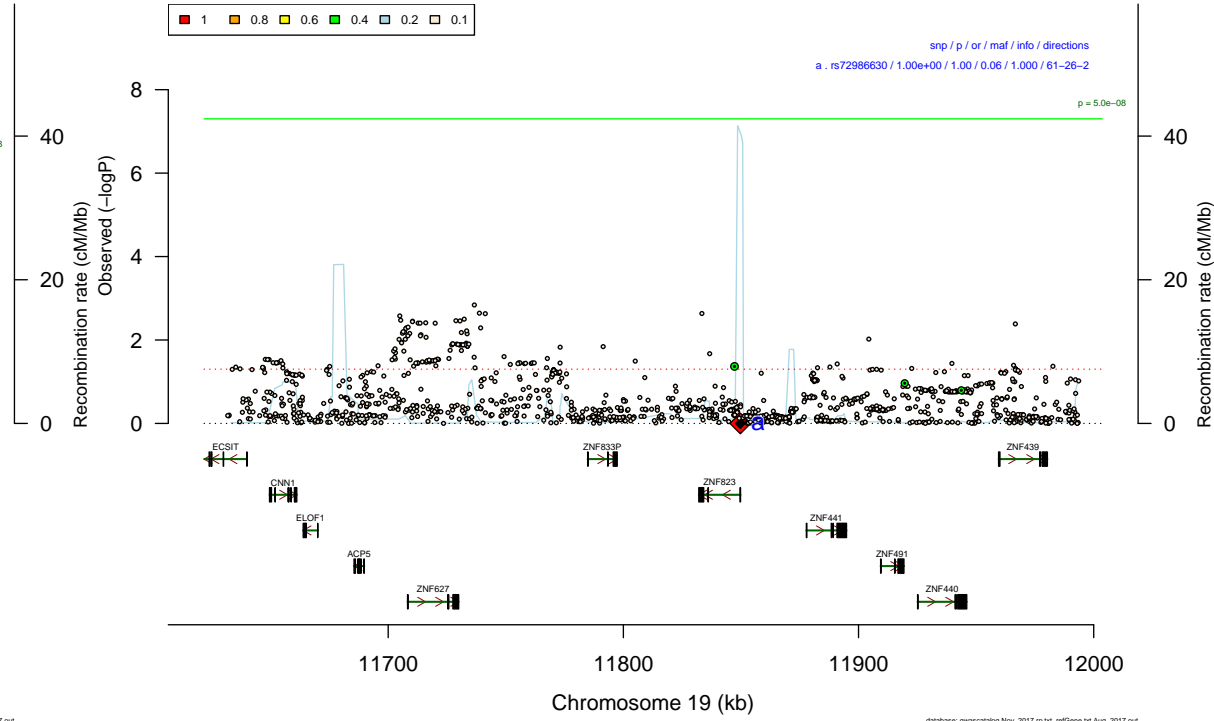

### SCZ\_uncond-rs6732355-chr2

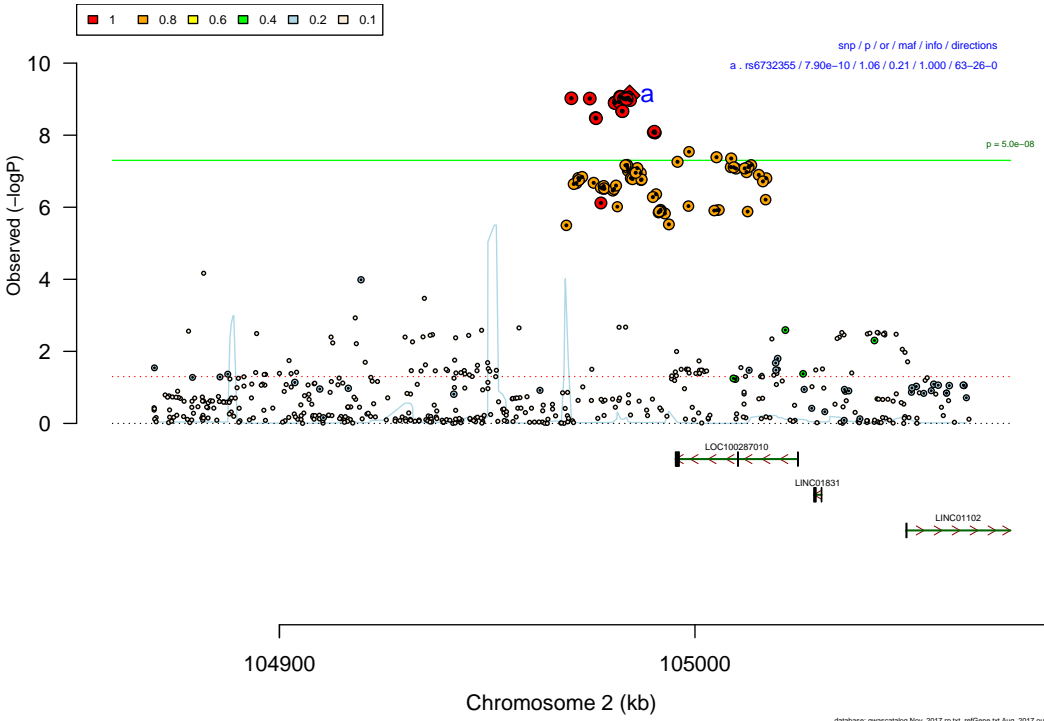

### SCZ\_cond\_rs6732355-chr2

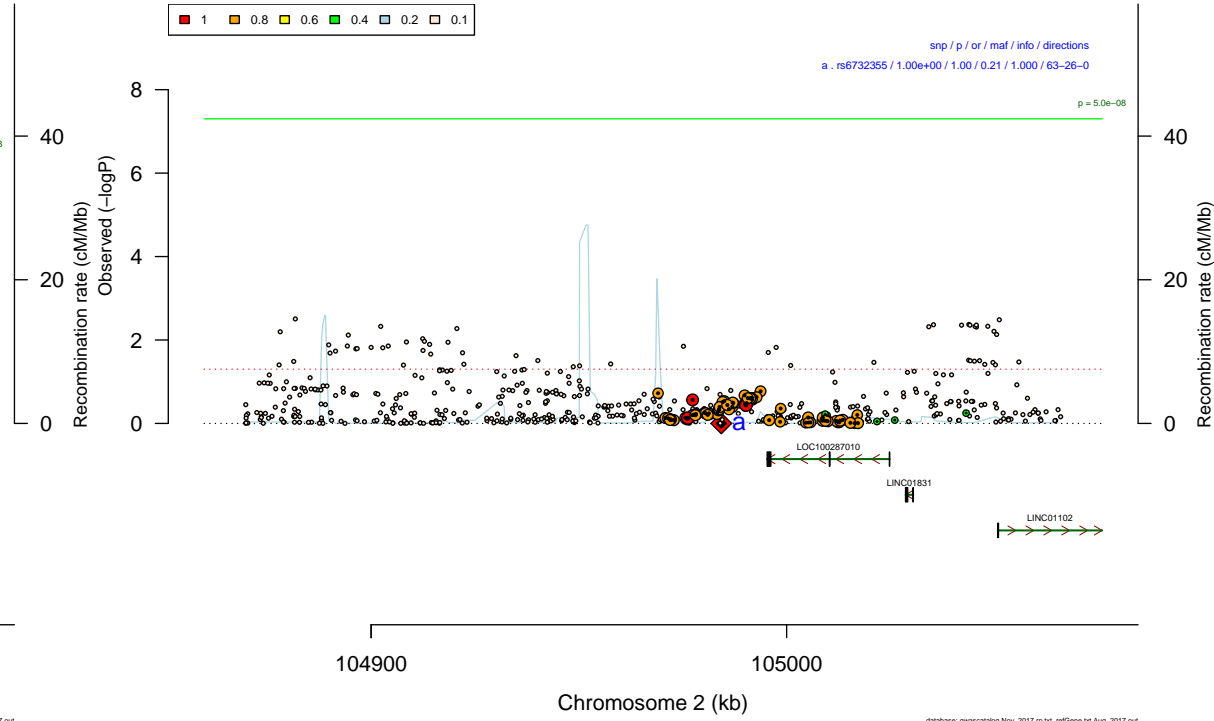

### SCZ\_uncond-rs39967-chr5

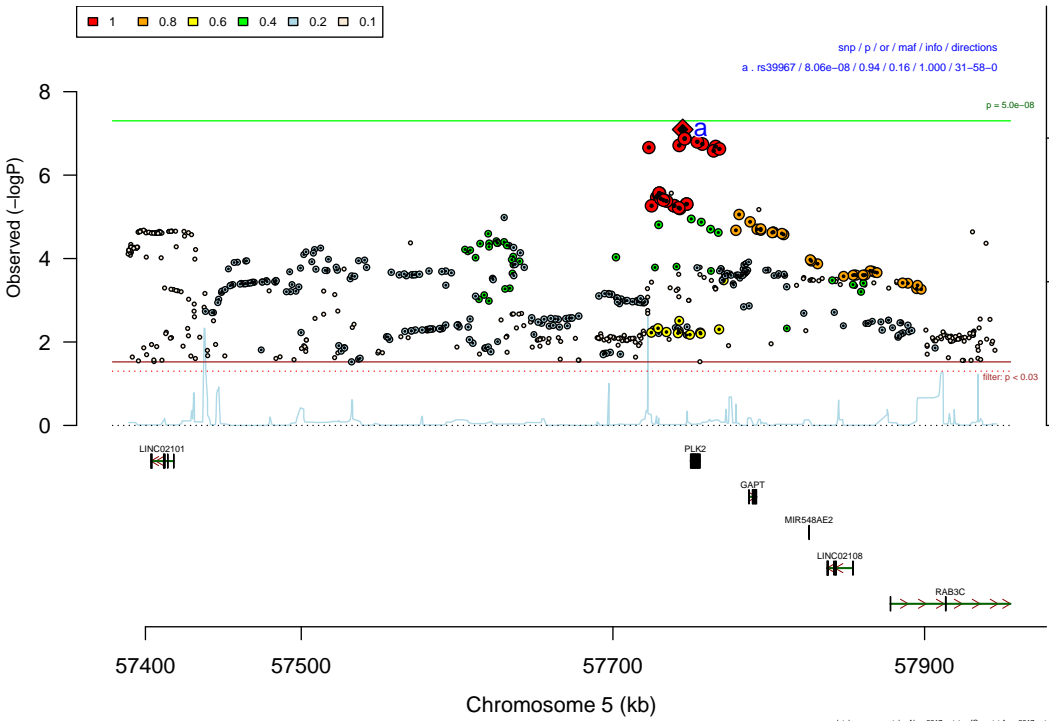

### SCZ\_cond\_rs39967-chr5

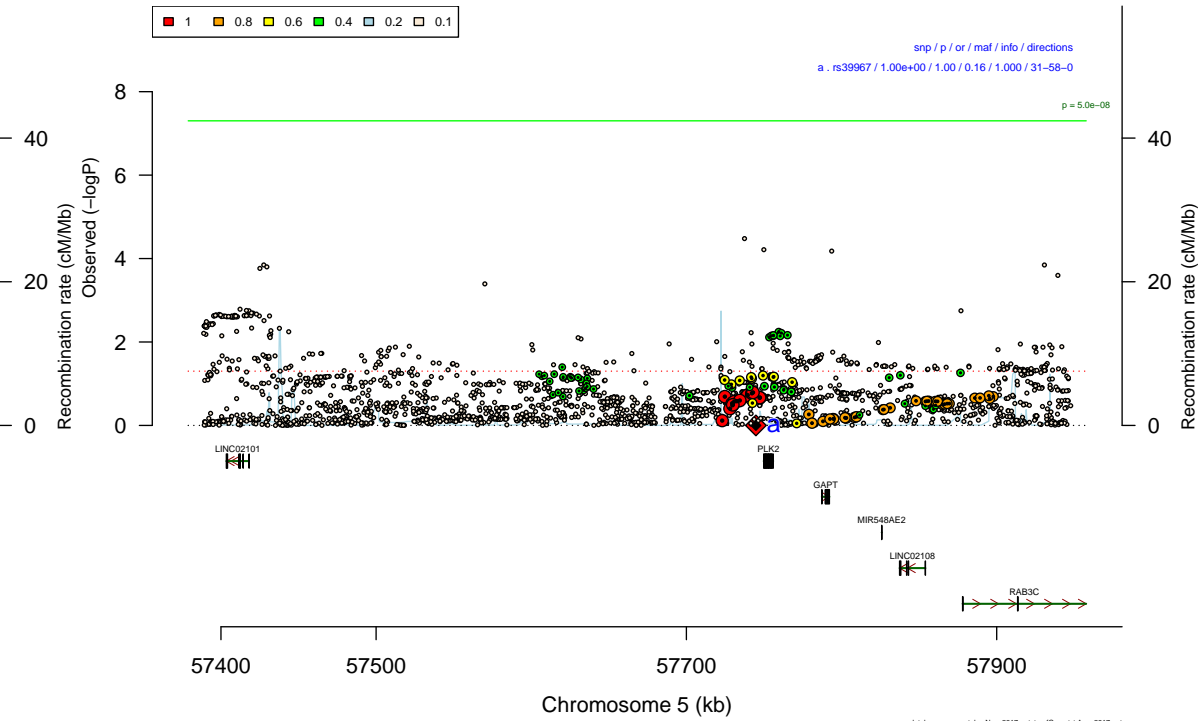

SCZ\_uncond-rs11740474-chr5

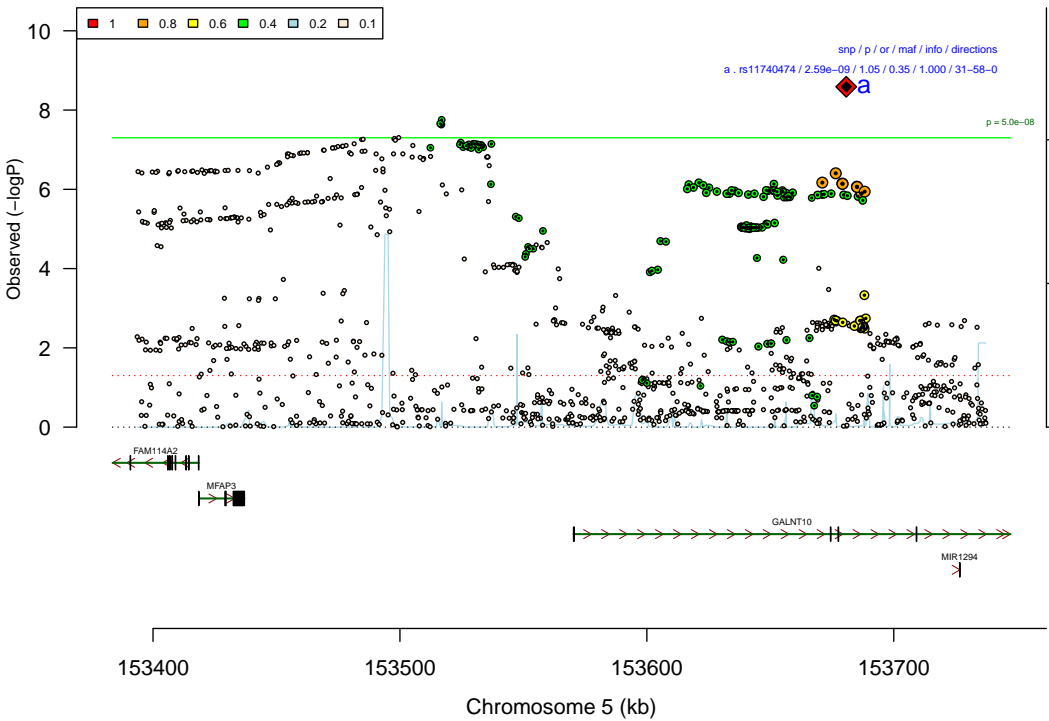

SCZ\_cond\_rs11740474-chr5

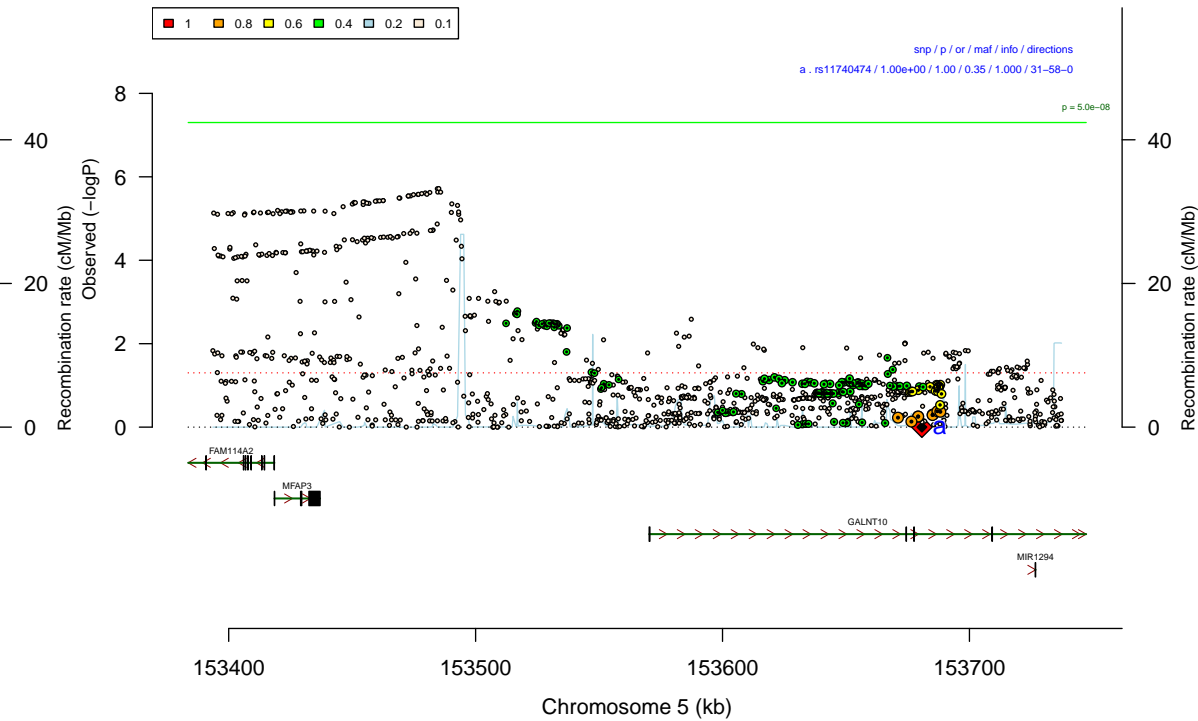

# SCZ\_uncond-rs61828917-chr1

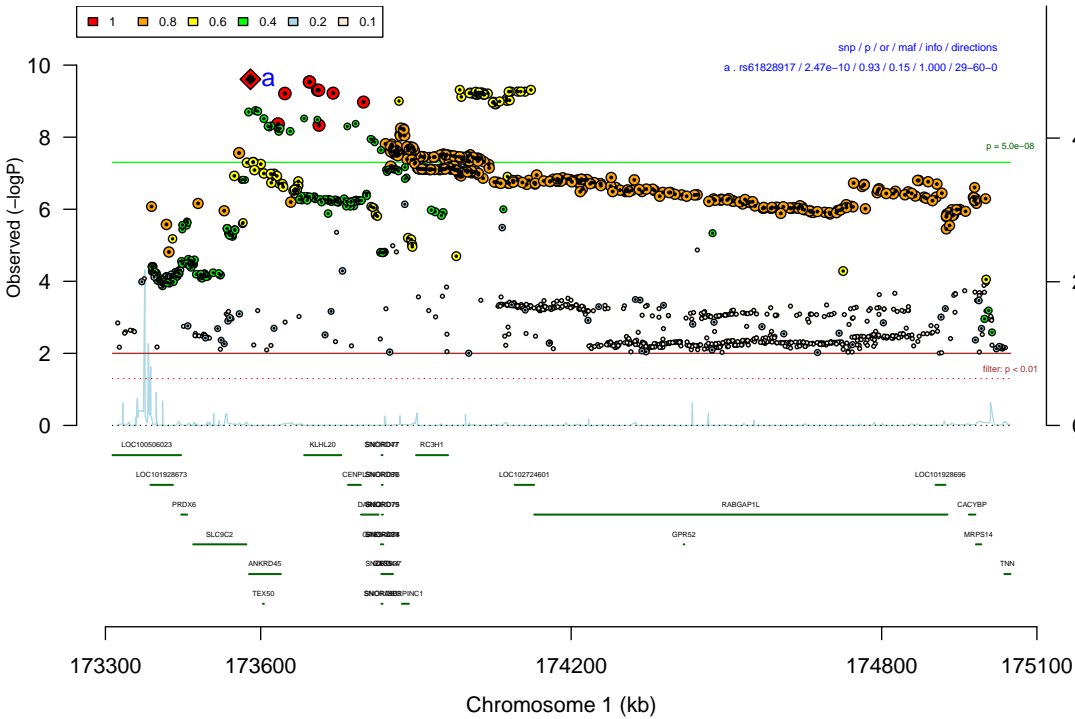

# SCZ\_cond\_rs61828917-chr1

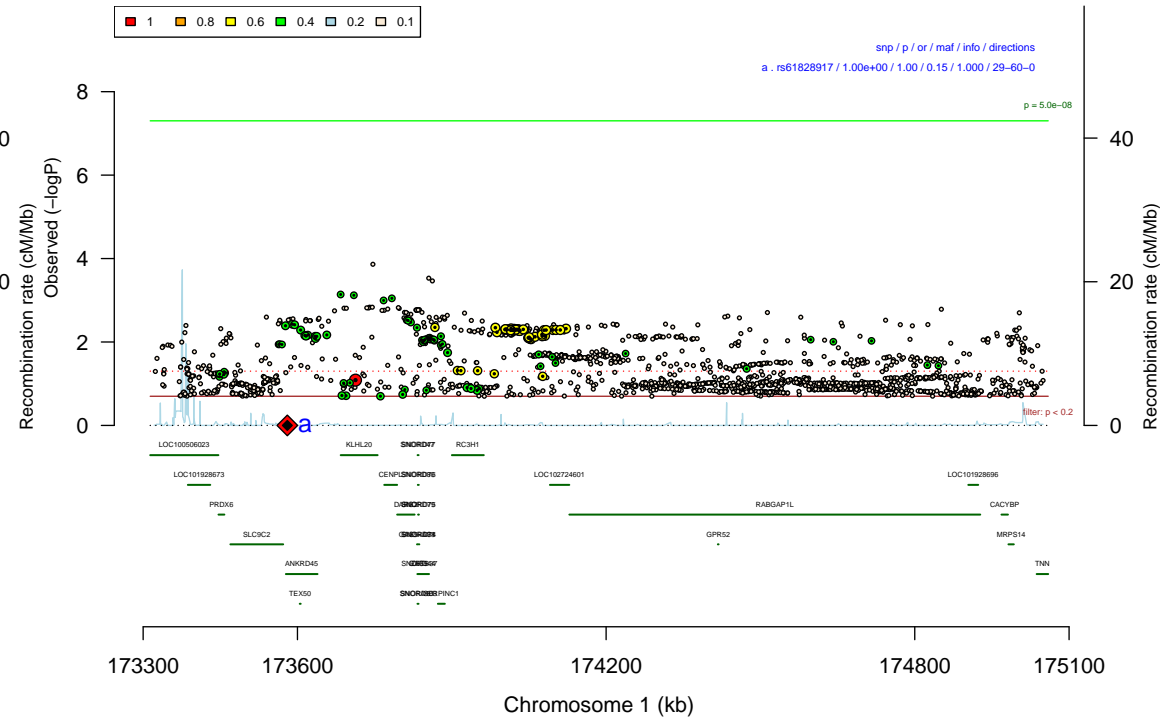

### SCZ\_uncond-rs2944821-chr7

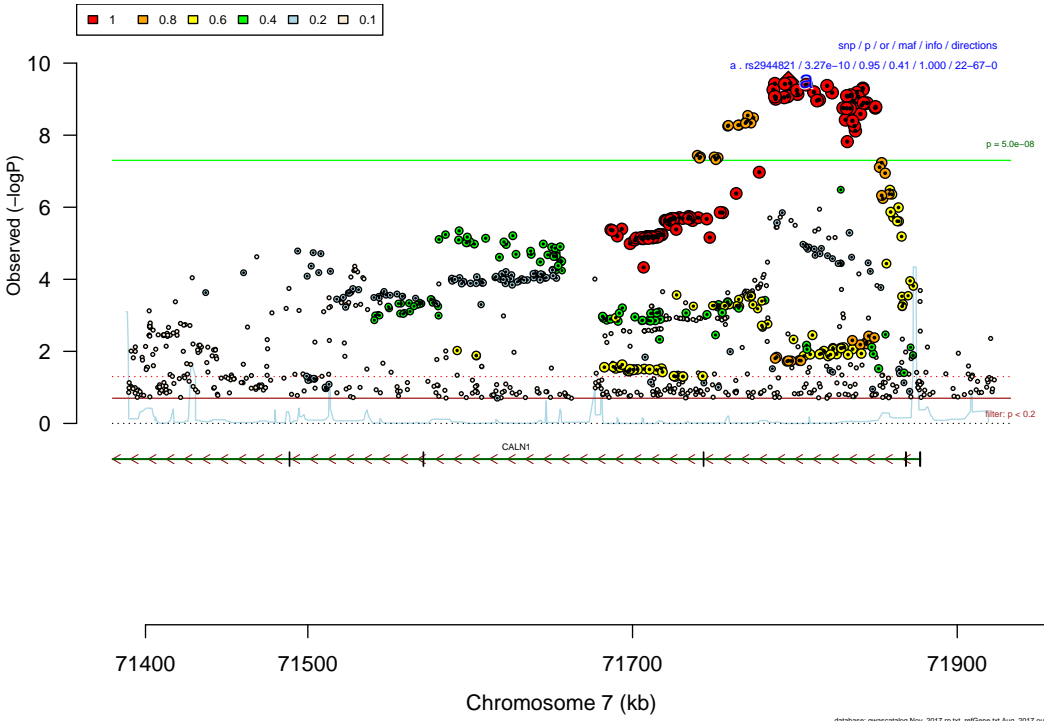

### SCZ\_cond\_rs2944821-chr7

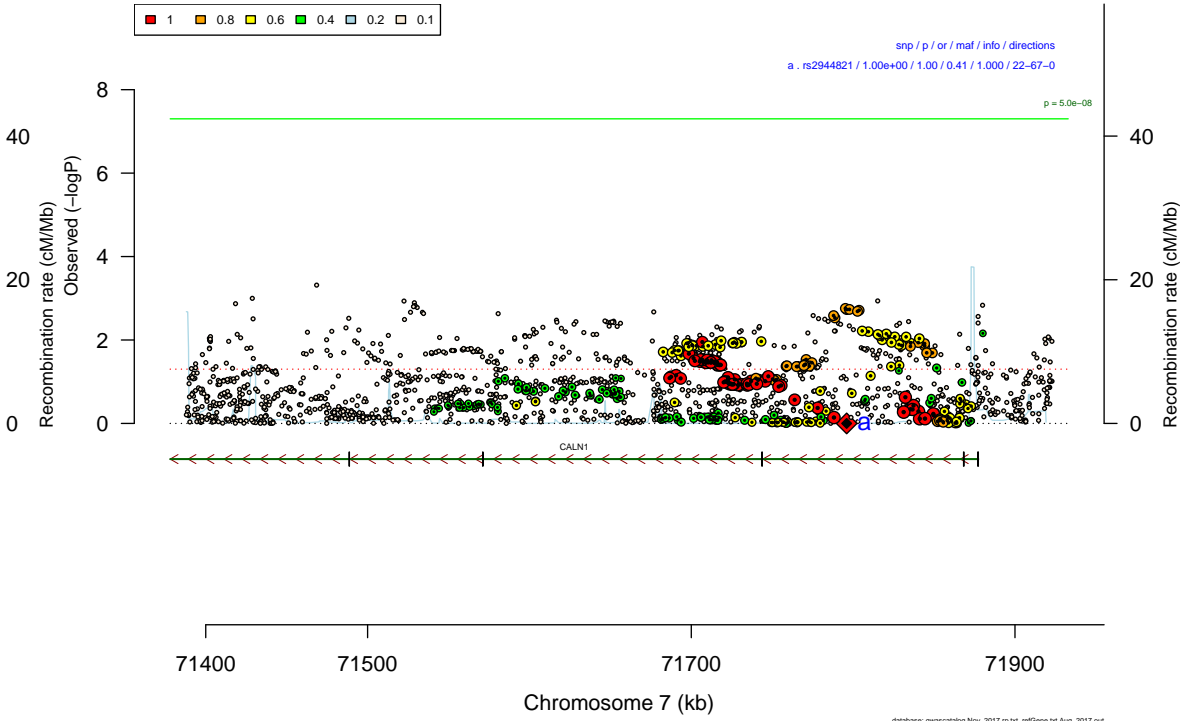



### SCZ\_uncond-rs7811417-chr7

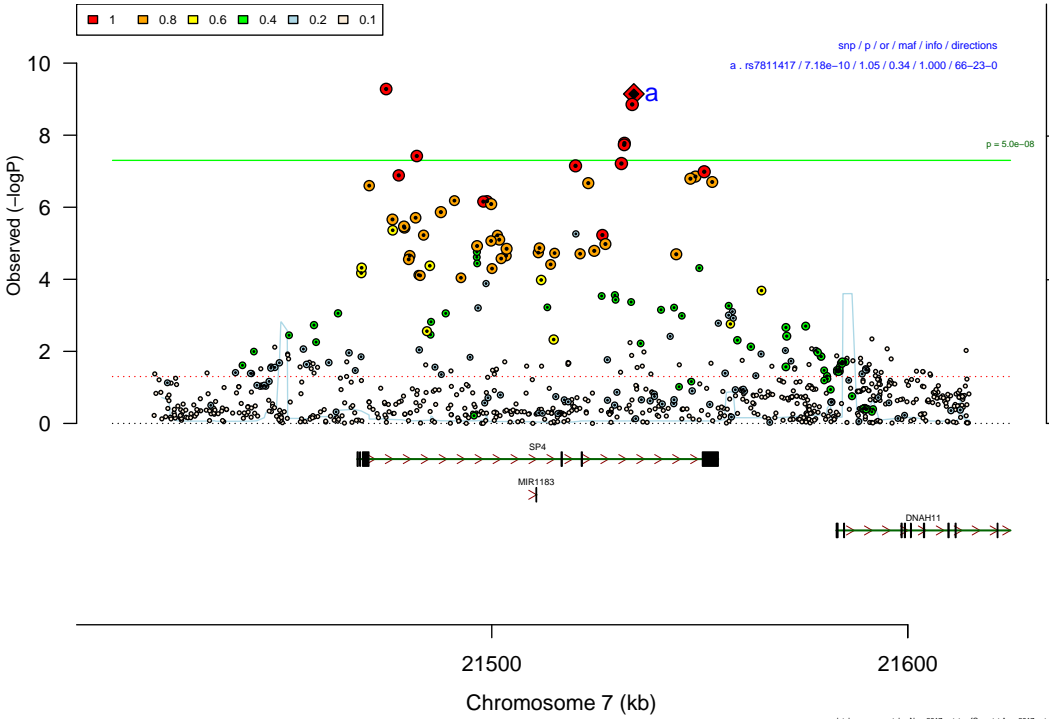

### SCZ\_cond\_rs7811417-chr7

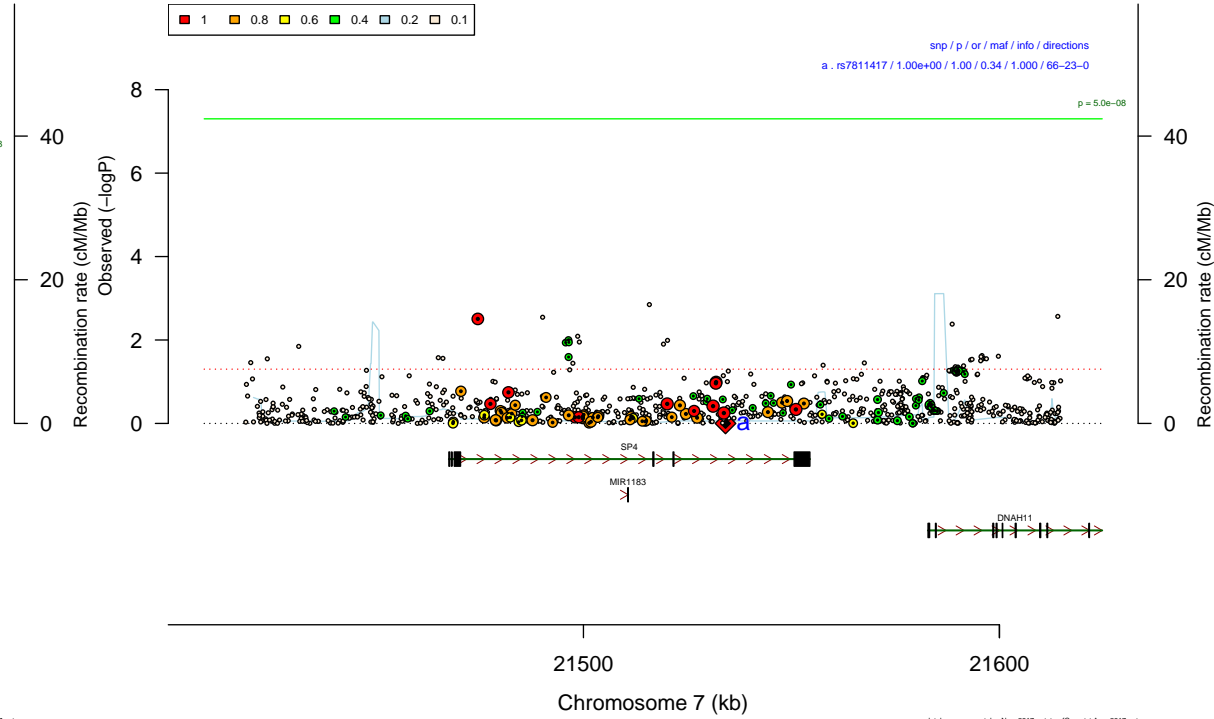

### SCZ\_uncond-rs61857878-chr10

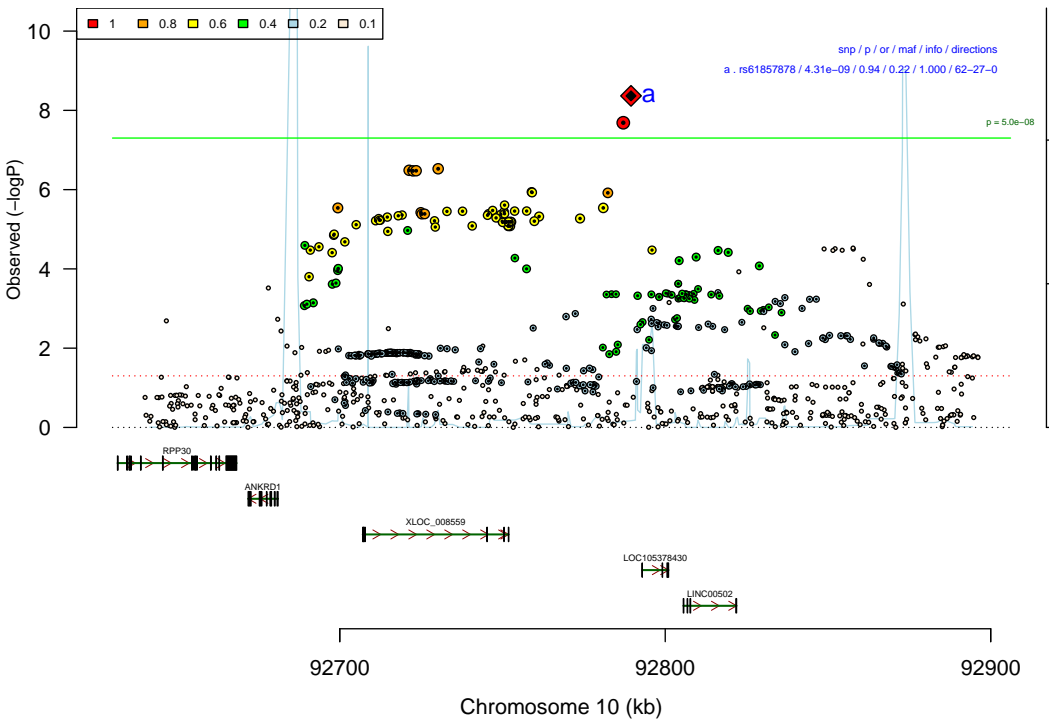

### SCZ\_cond\_rs61857878-chr10

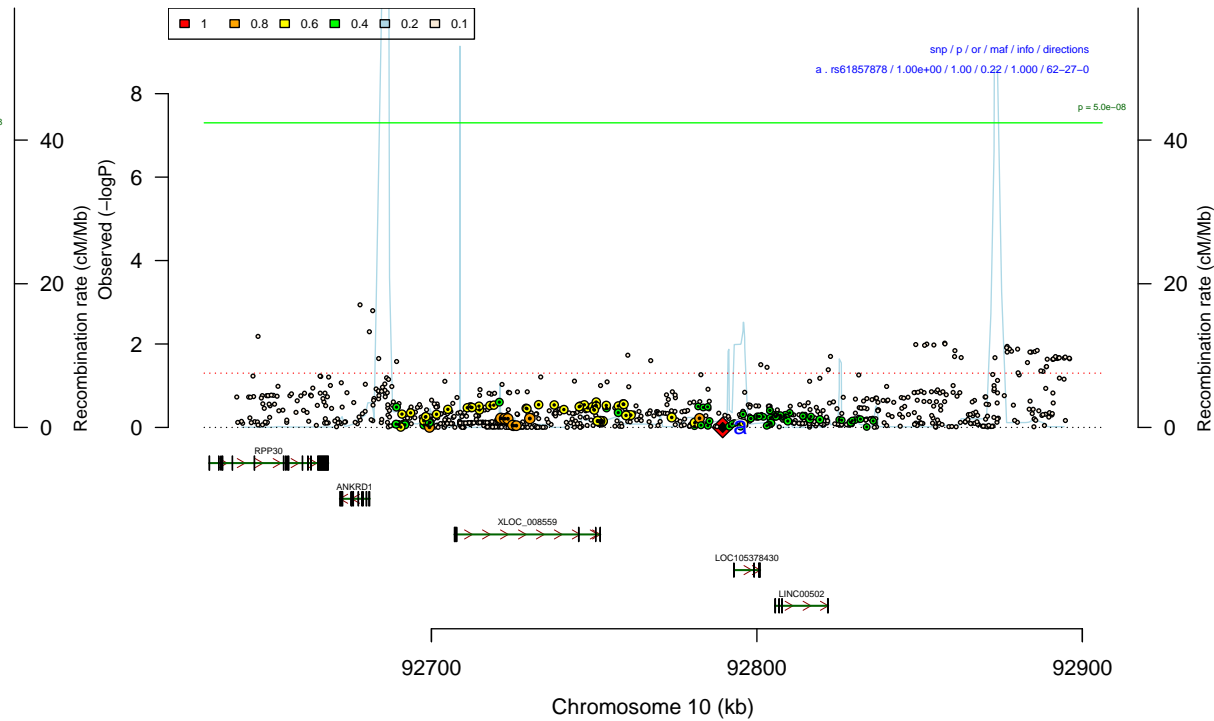

SCZ\_uncond-rs9975024-chr21

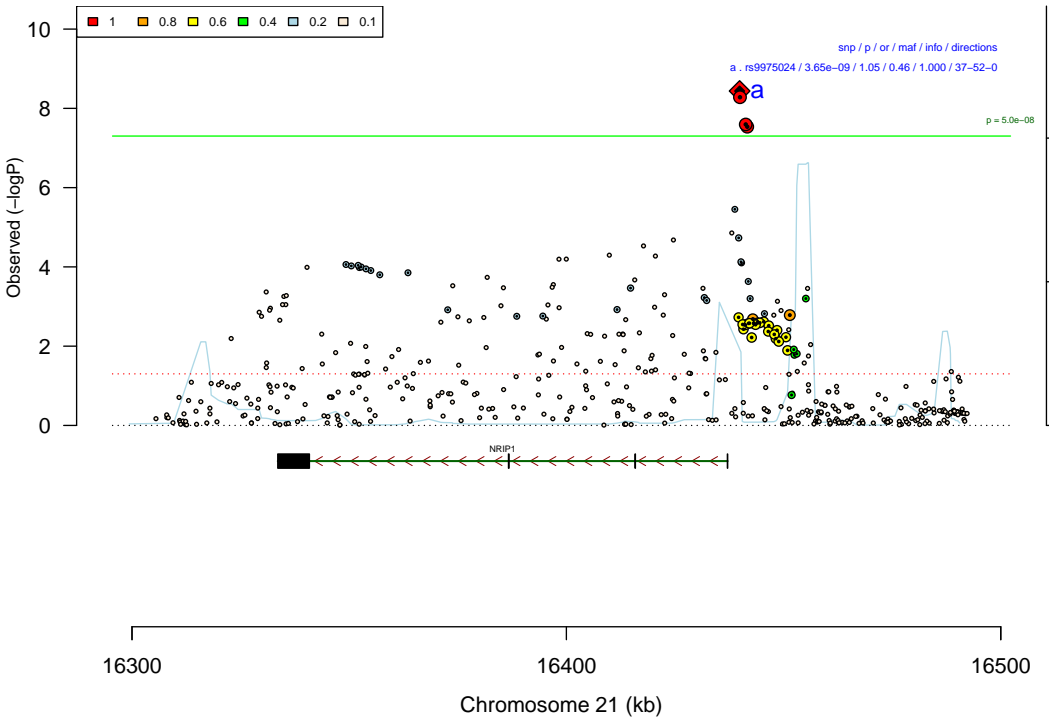

SCZ\_cond\_rs9975024-chr21

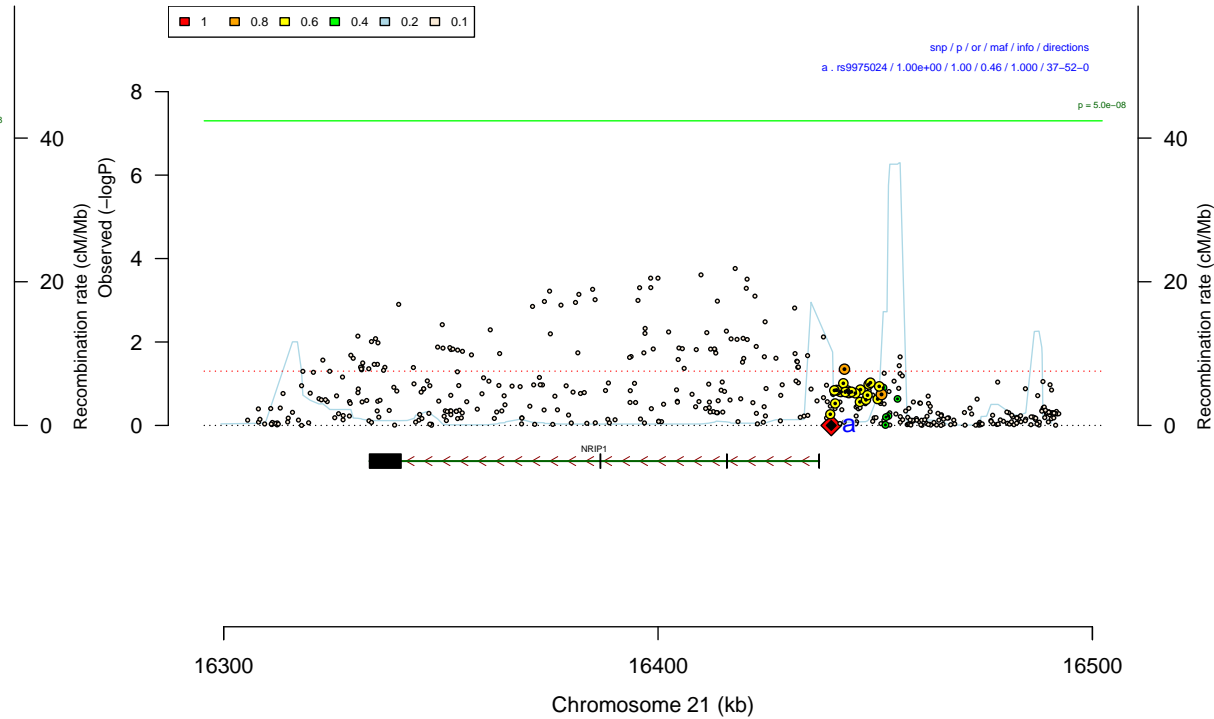

### SCZ\_uncond-rs2649999-chr12

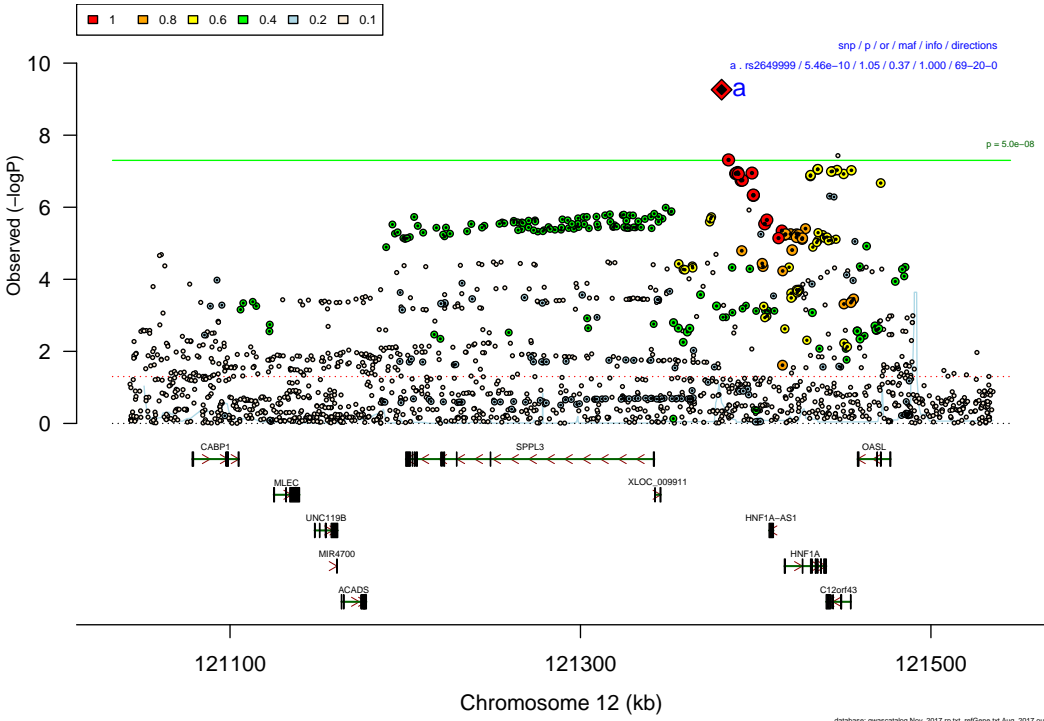

### SCZ\_cond\_rs2649999-chr12

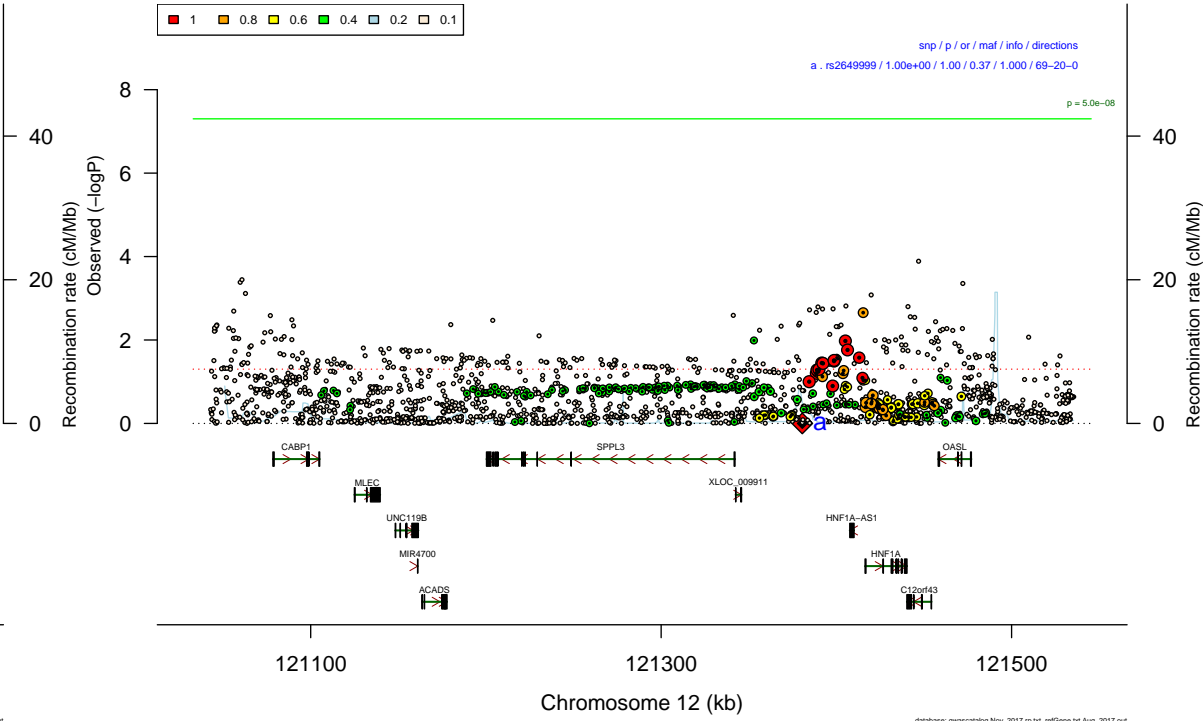

### SCZ\_uncond-rs8048039-chr16

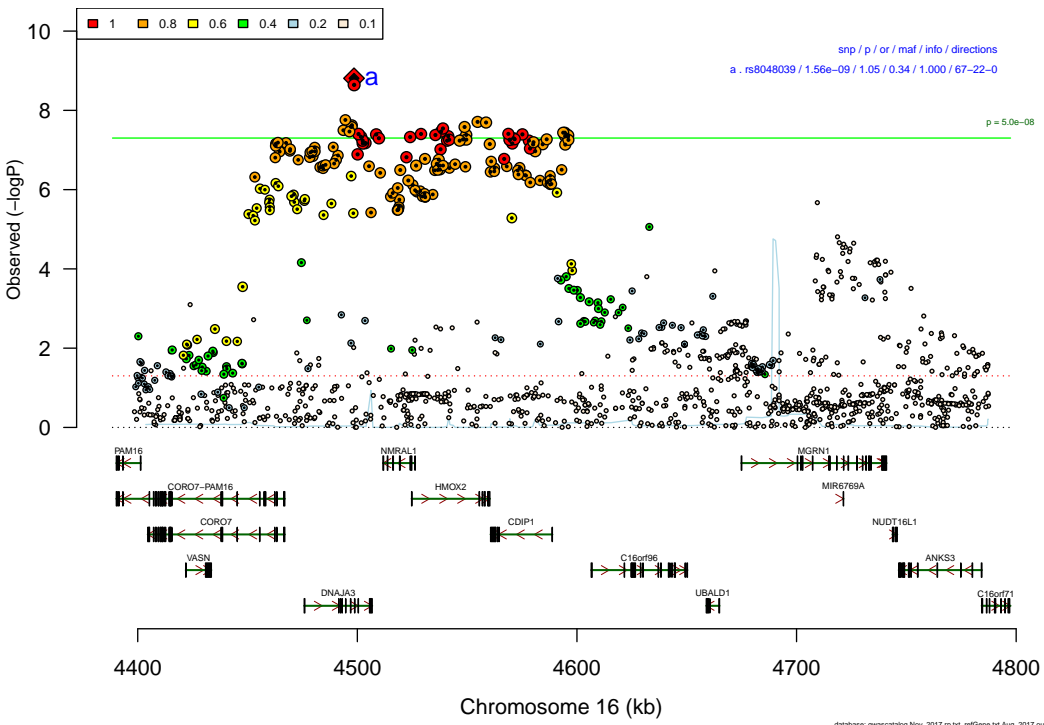

### SCZ\_cond\_rs8048039-chr16

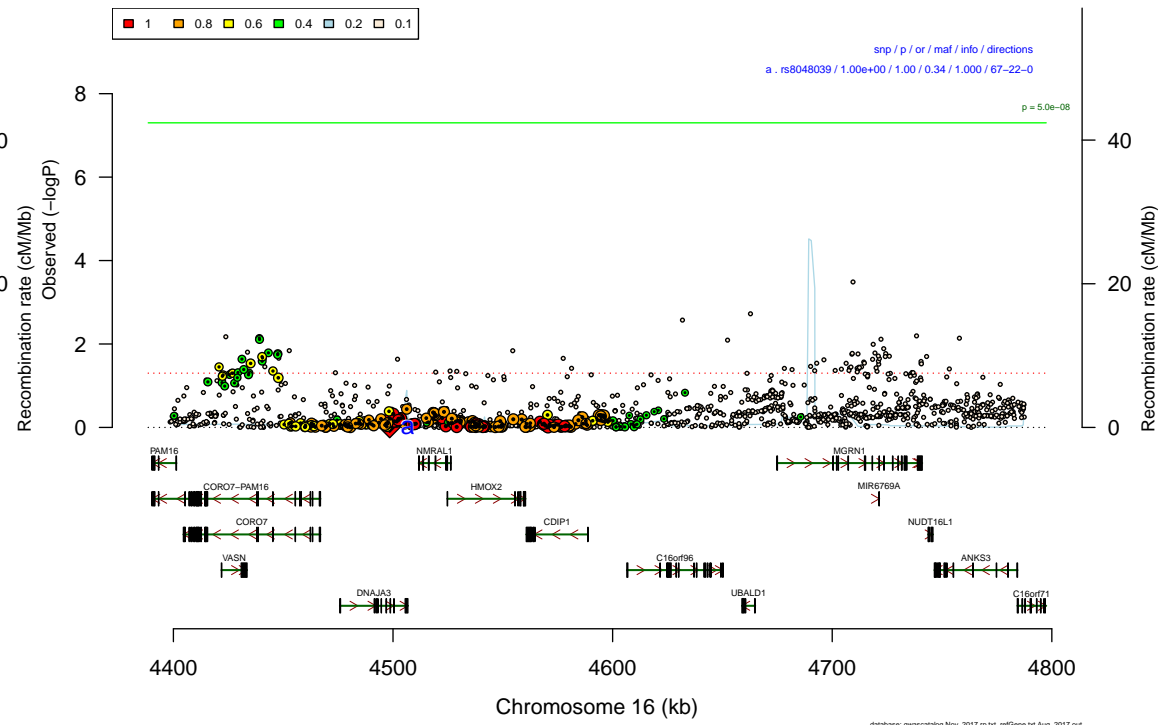

SCZ\_uncond-rs10148671-chr14

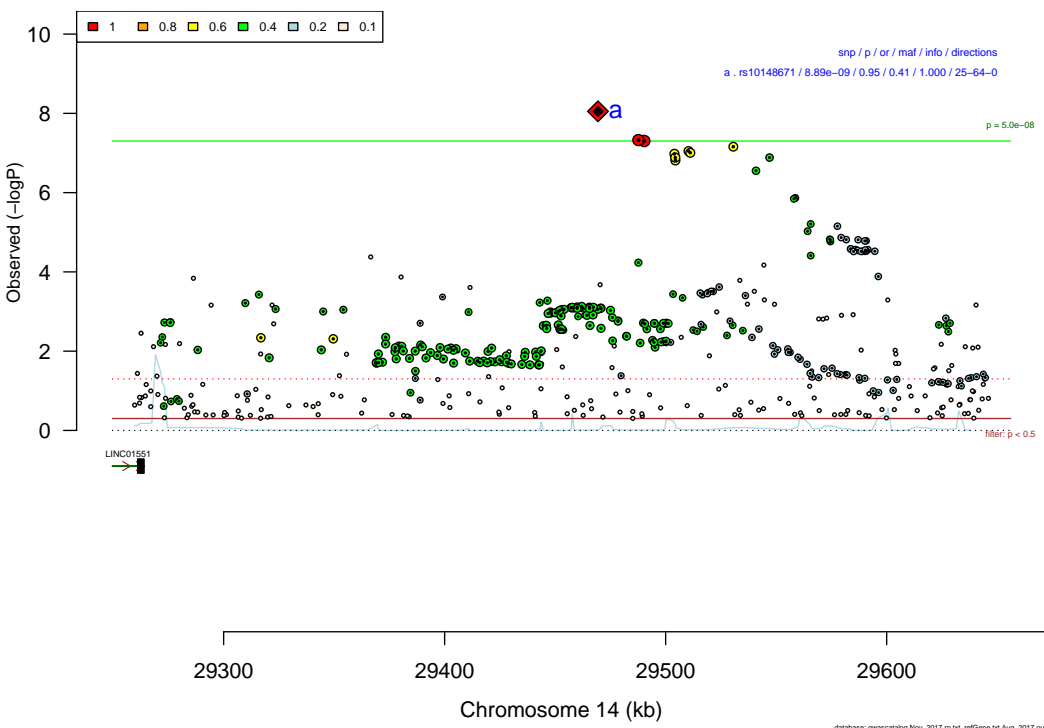

SCZ\_cond\_rs10148671-chr14

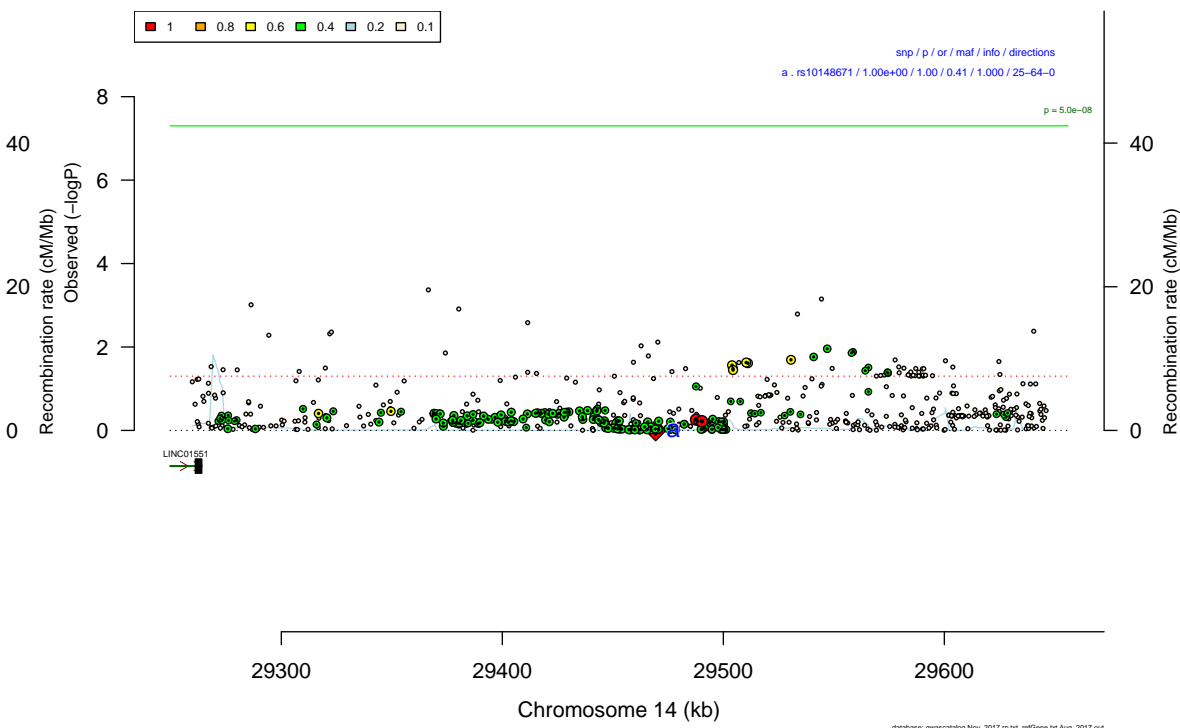

### SCZ\_uncond-rs28454198-chr4

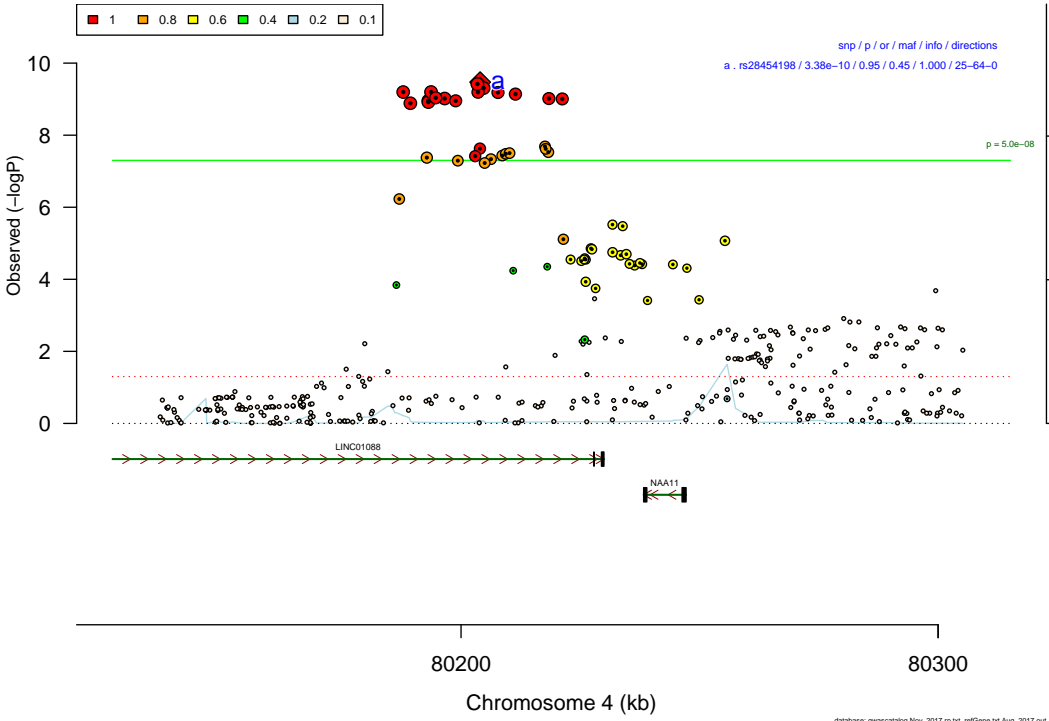

### SCZ\_cond\_rs28454198-chr4

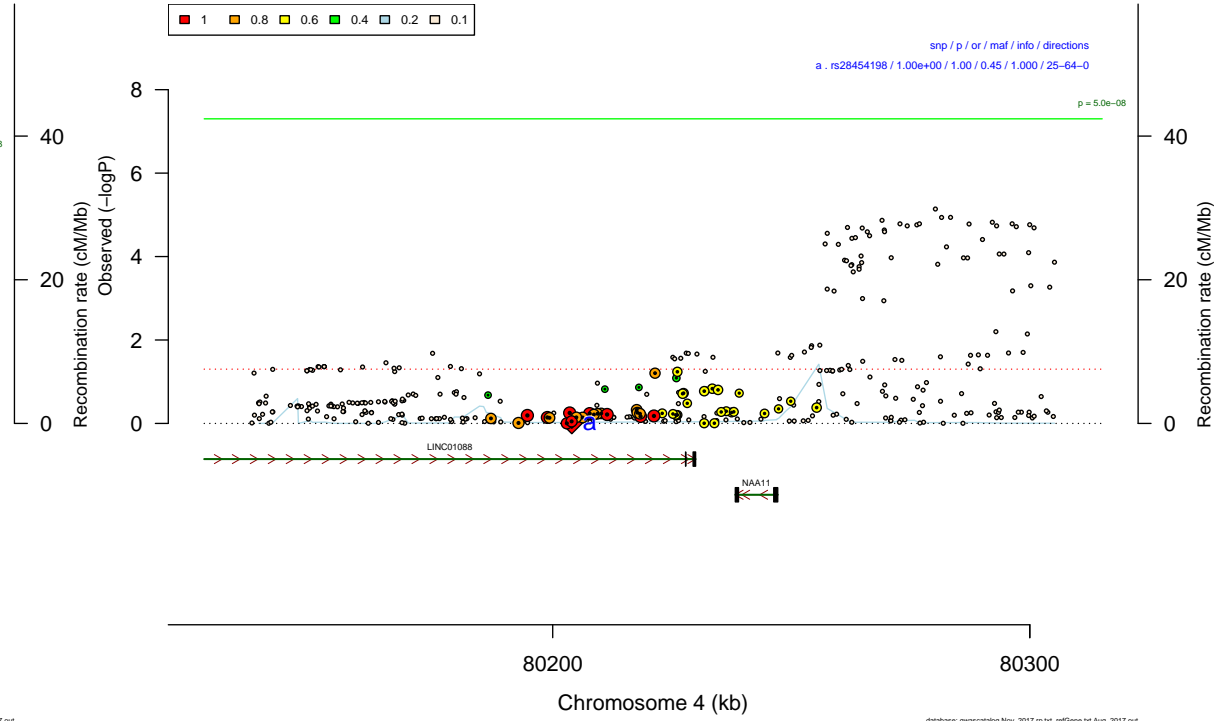

### SCZ\_uncond-rs59519965-chr1

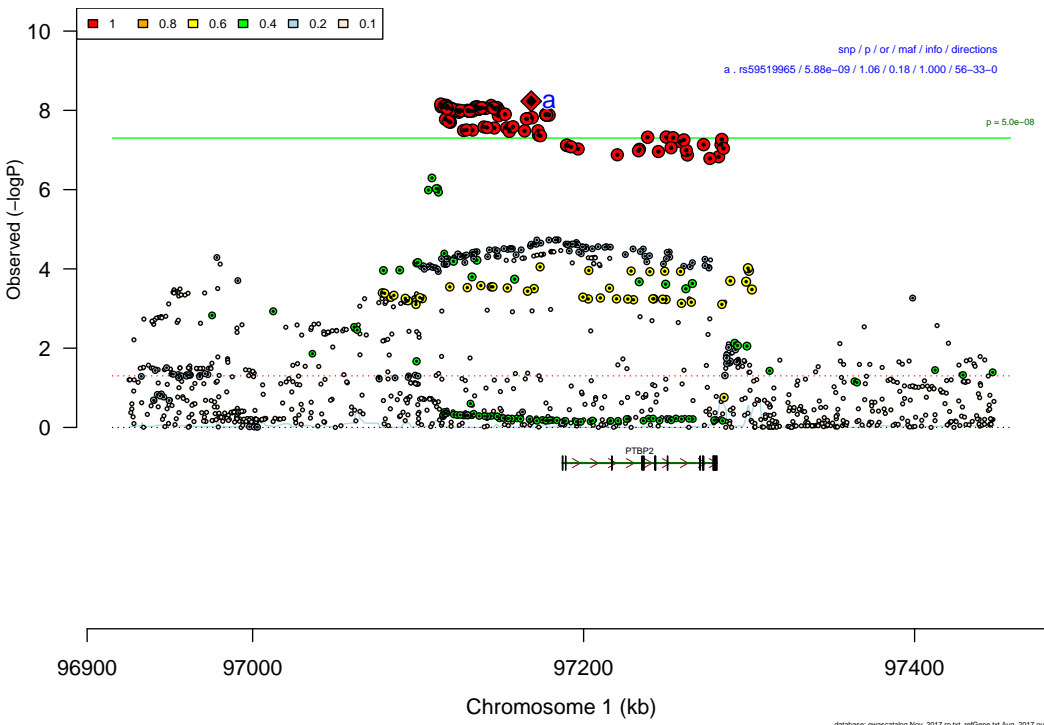

### SCZ\_cond\_rs59519965-chr1

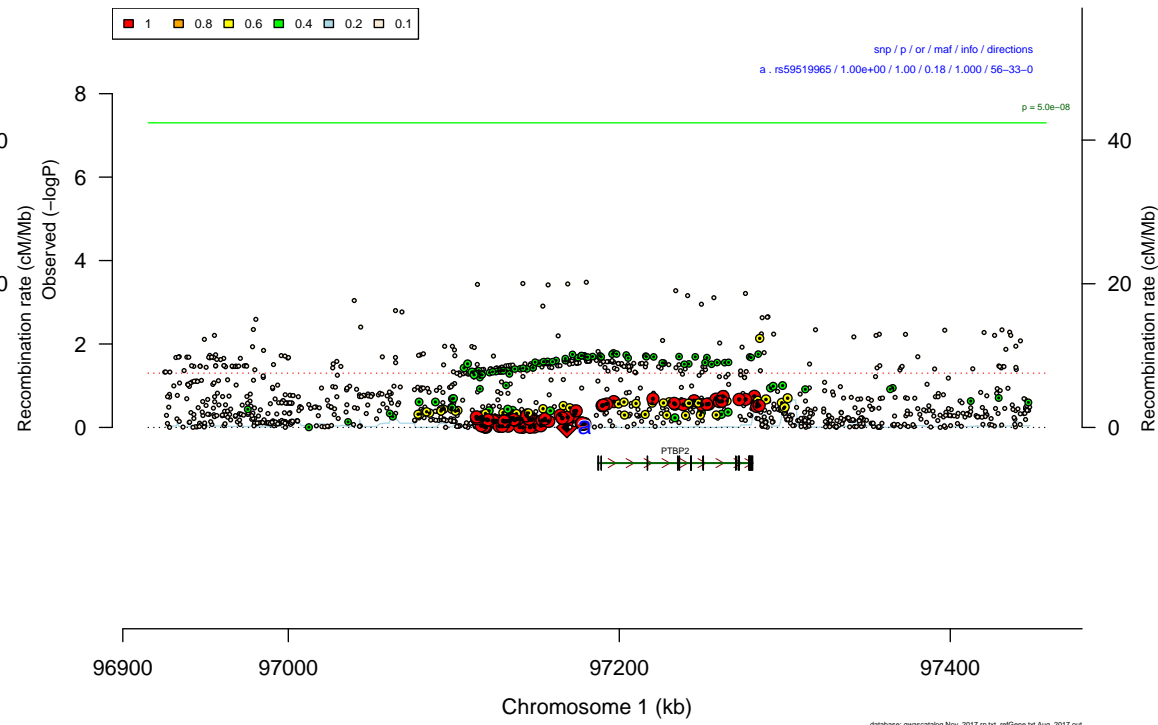



### SCZ\_uncond-rs252812-chr5

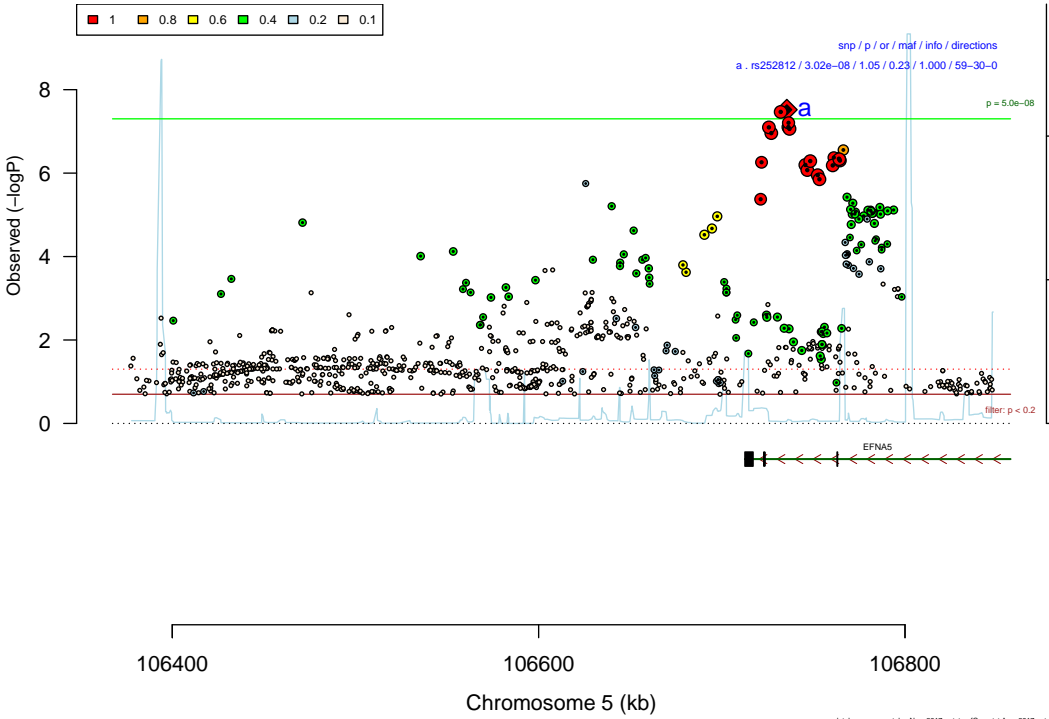

### SCZ\_cond\_rs252812-chr5

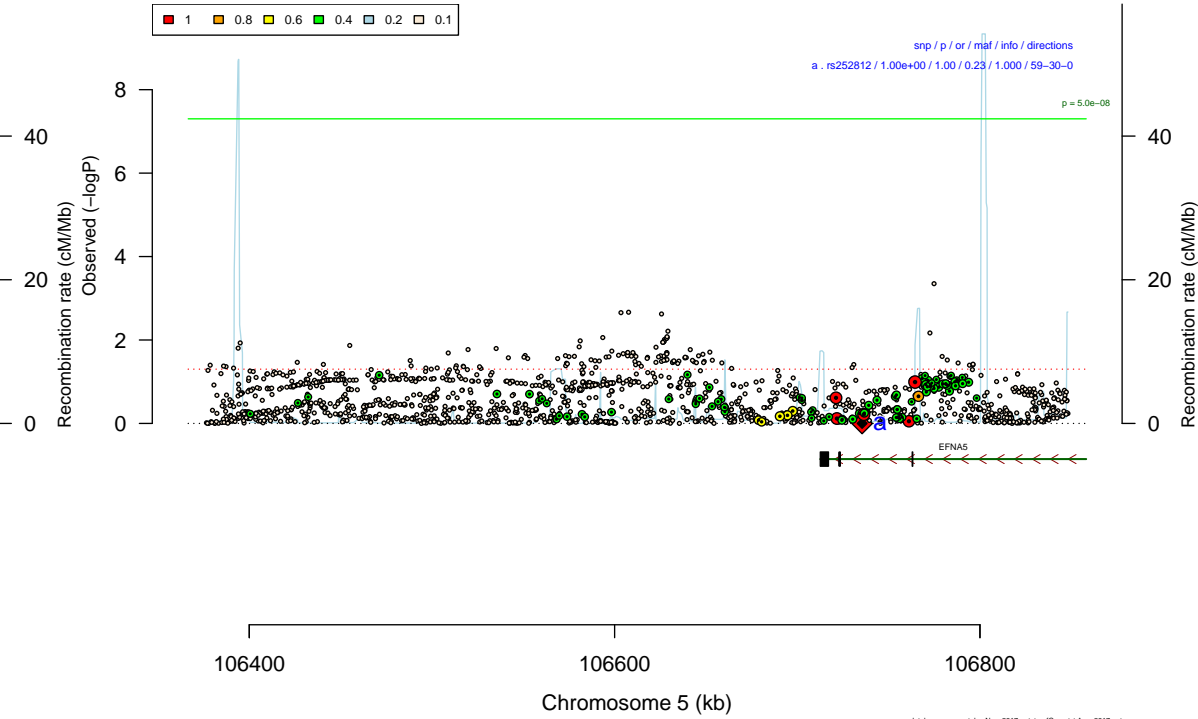

### SCZ\_uncond-rs6925079-chr6

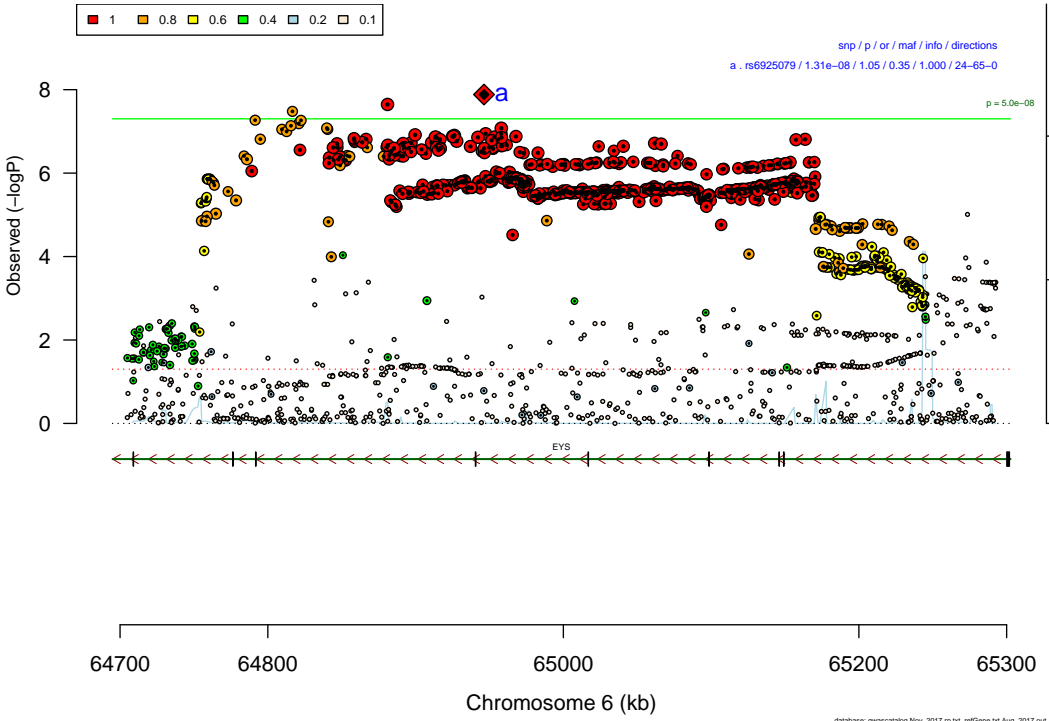

### SCZ\_cond\_rs6925079-chr6

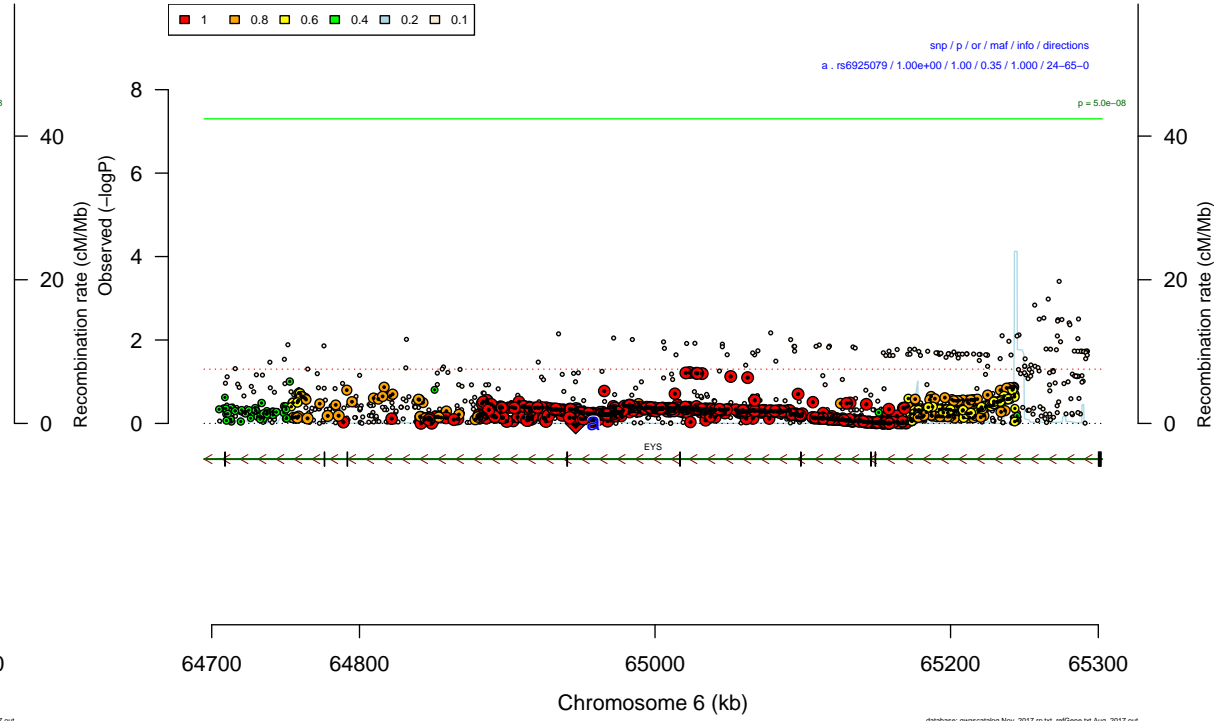

### SCZ\_uncond-rs4779050-chr15

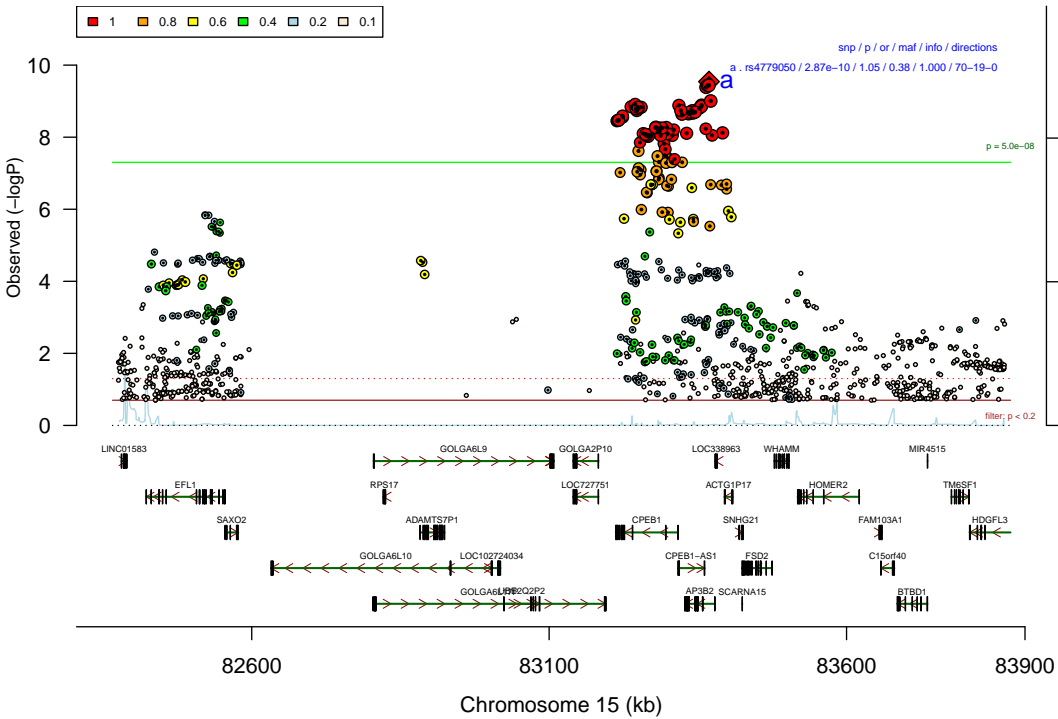

### SCZ\_cond\_rs4779050-chr15

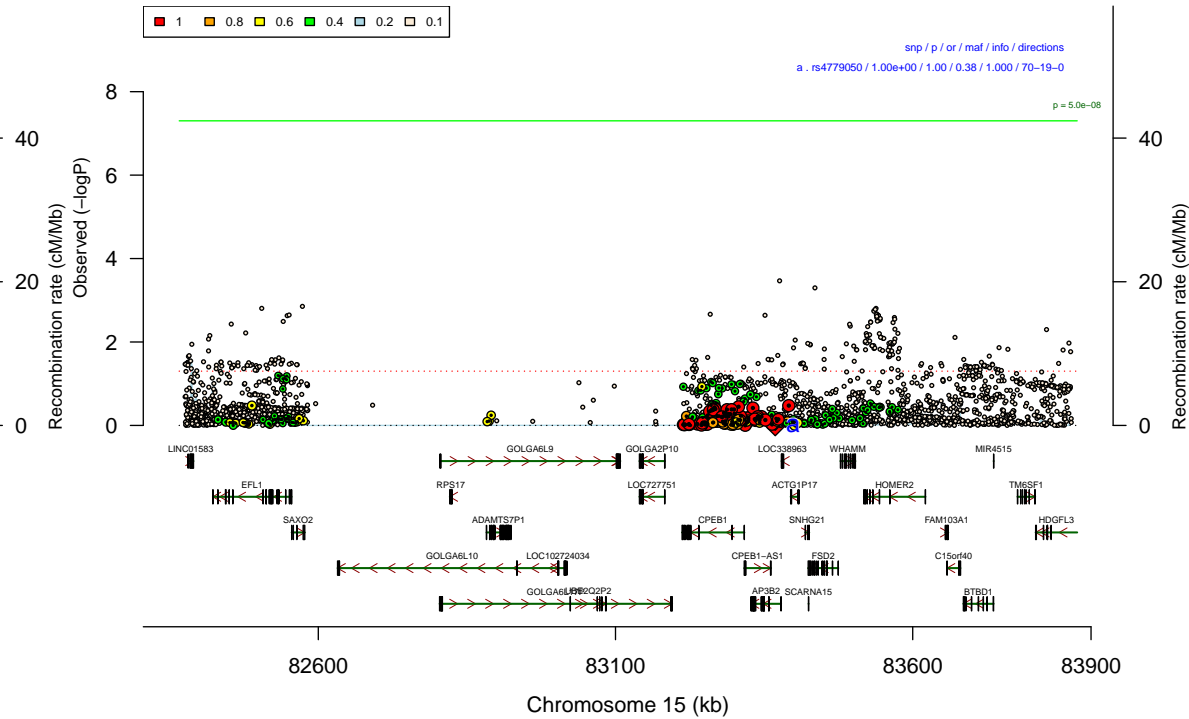

### SCZ\_uncond-rs10985811-chr9

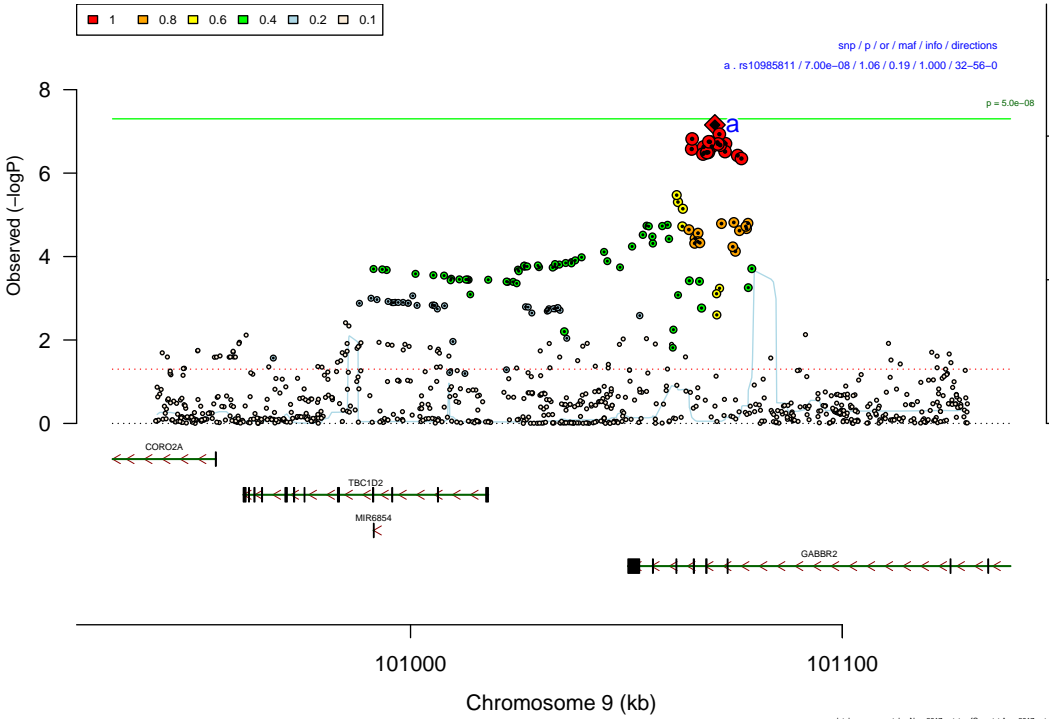

### SCZ\_cond\_rs10985811-chr9

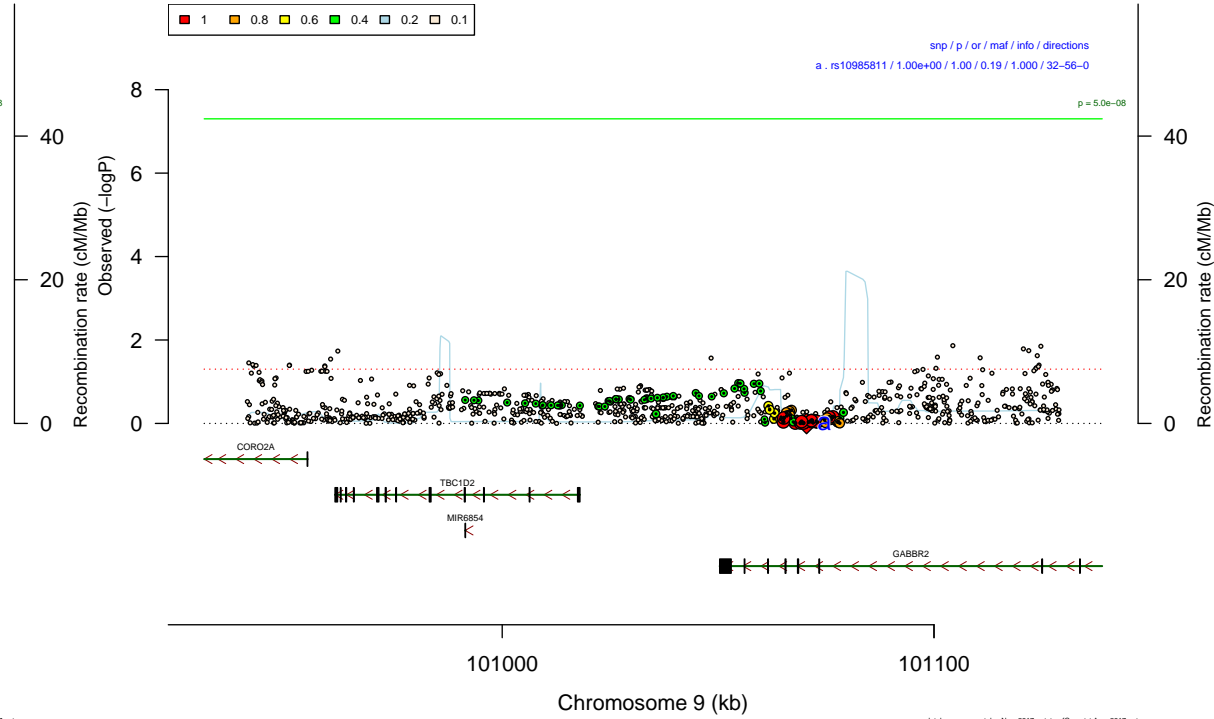

### SCZ\_uncond-rs1856507-chr6

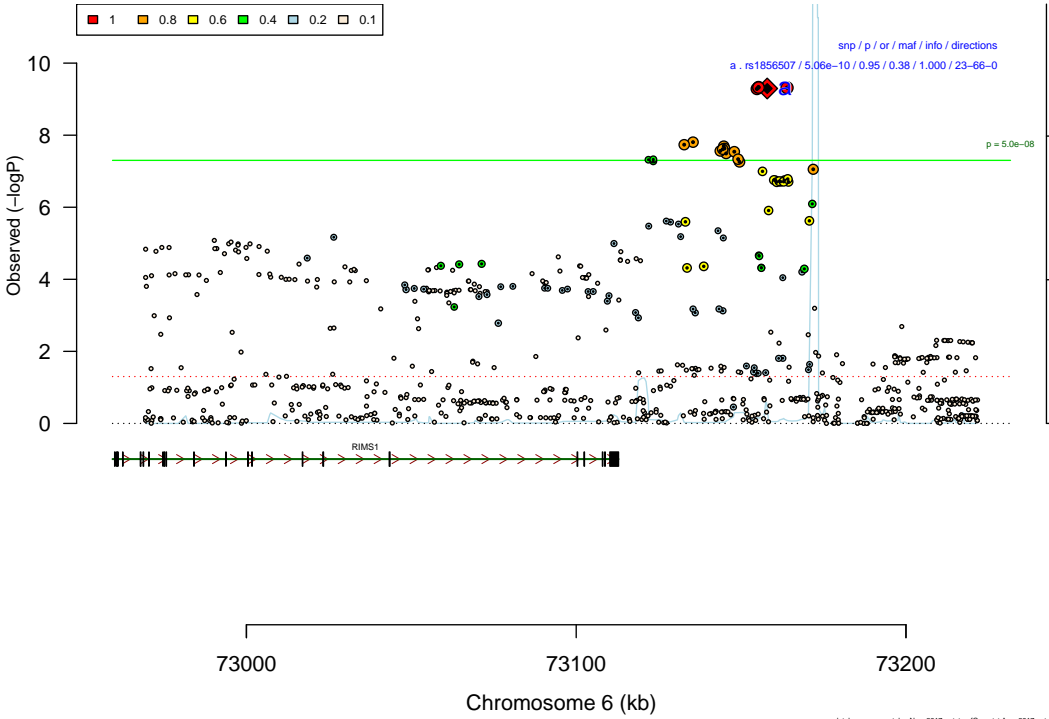

### SCZ\_cond\_rs1856507-chr6

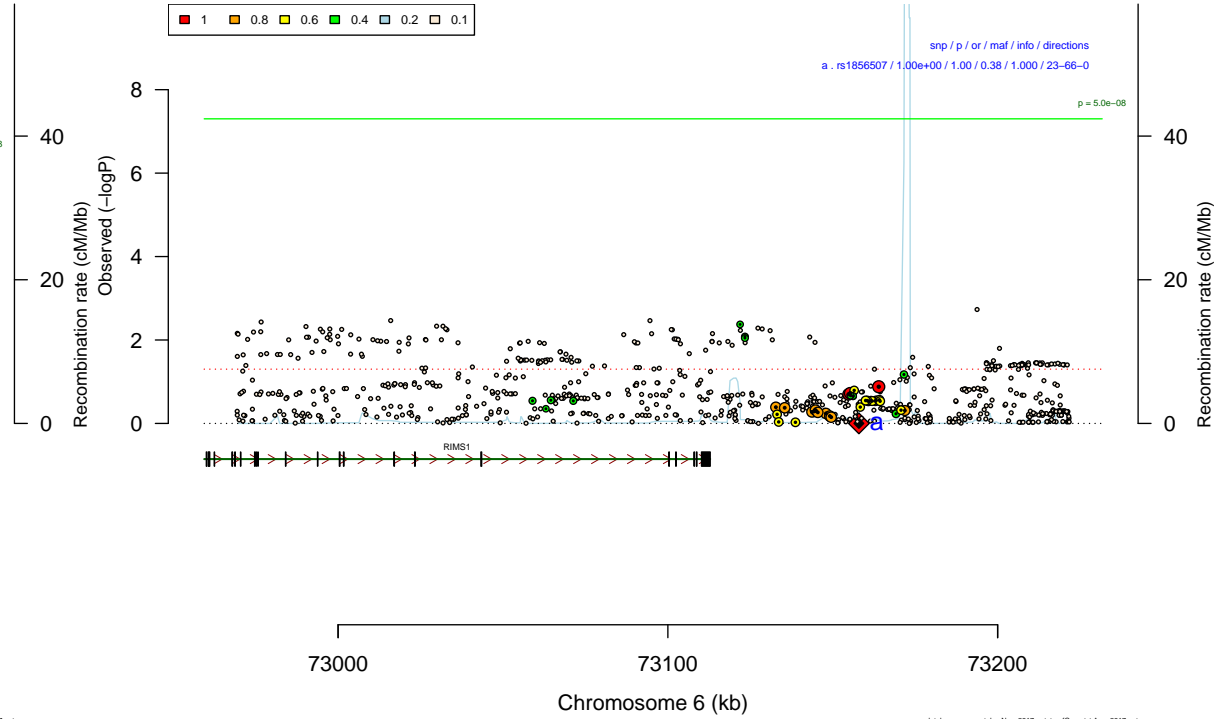

### SCZ\_uncond-rs2119242-chr10

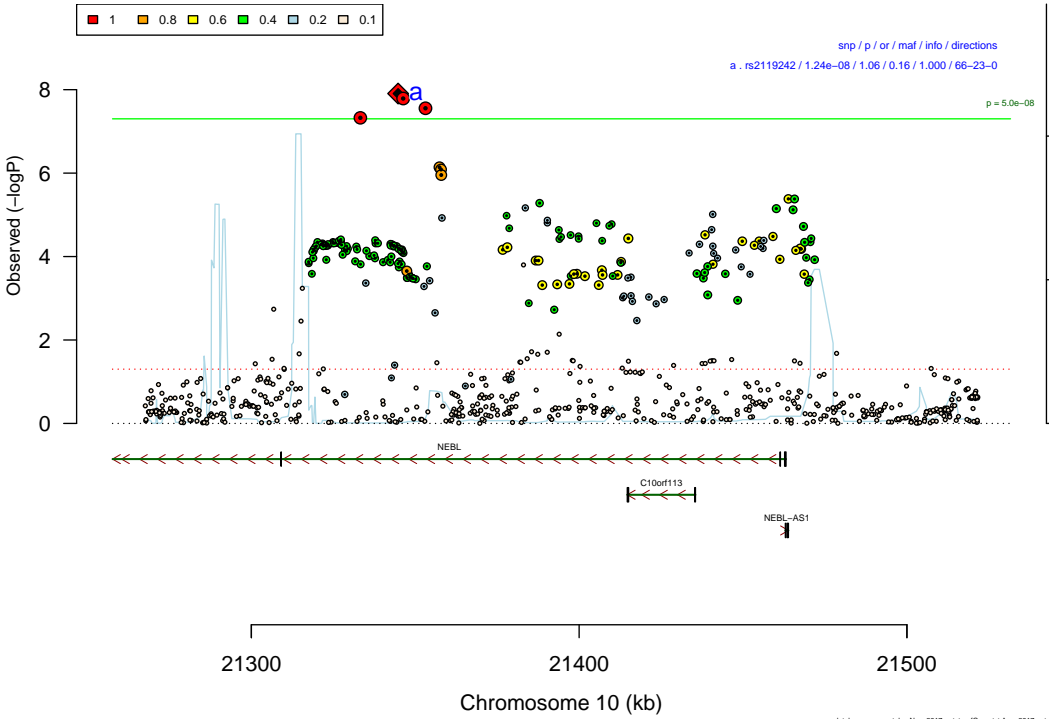

### SCZ\_cond\_rs2119242-chr10

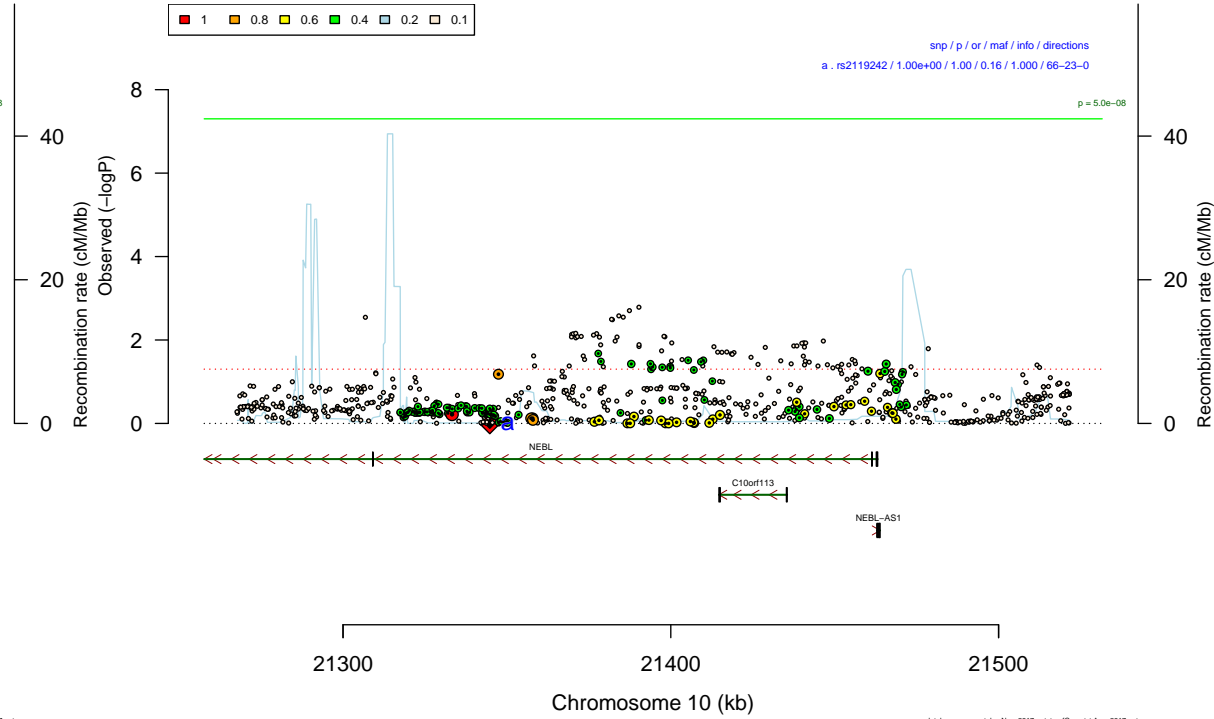

### SCZ\_uncond-rs1589726-chr7

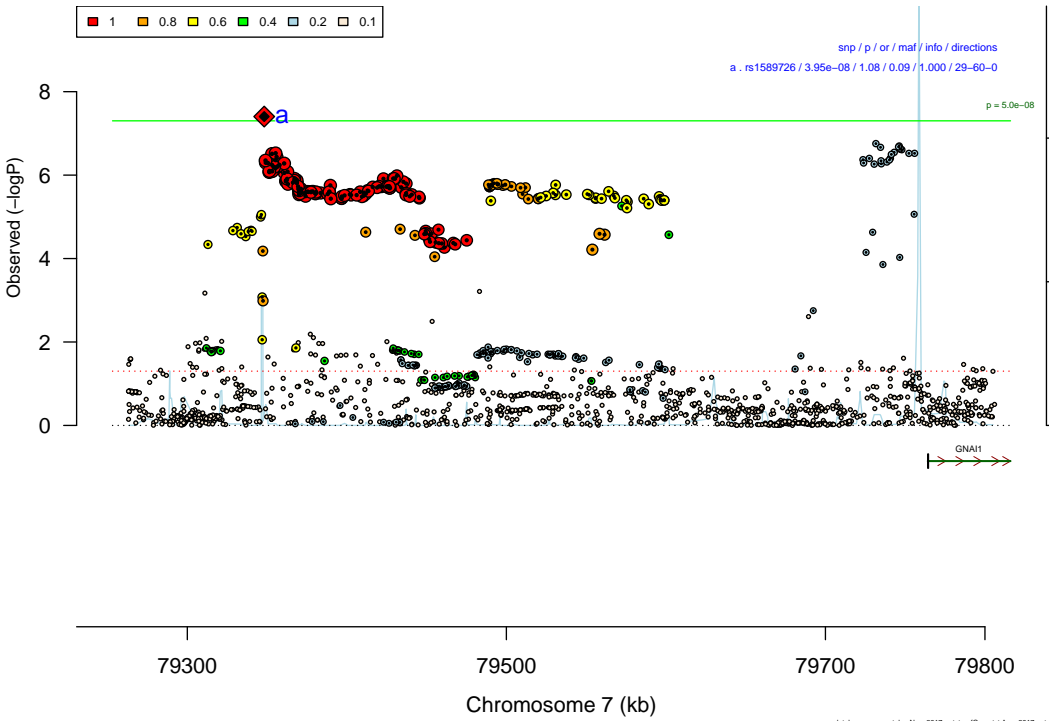

### SCZ\_cond\_rs1589726-chr7

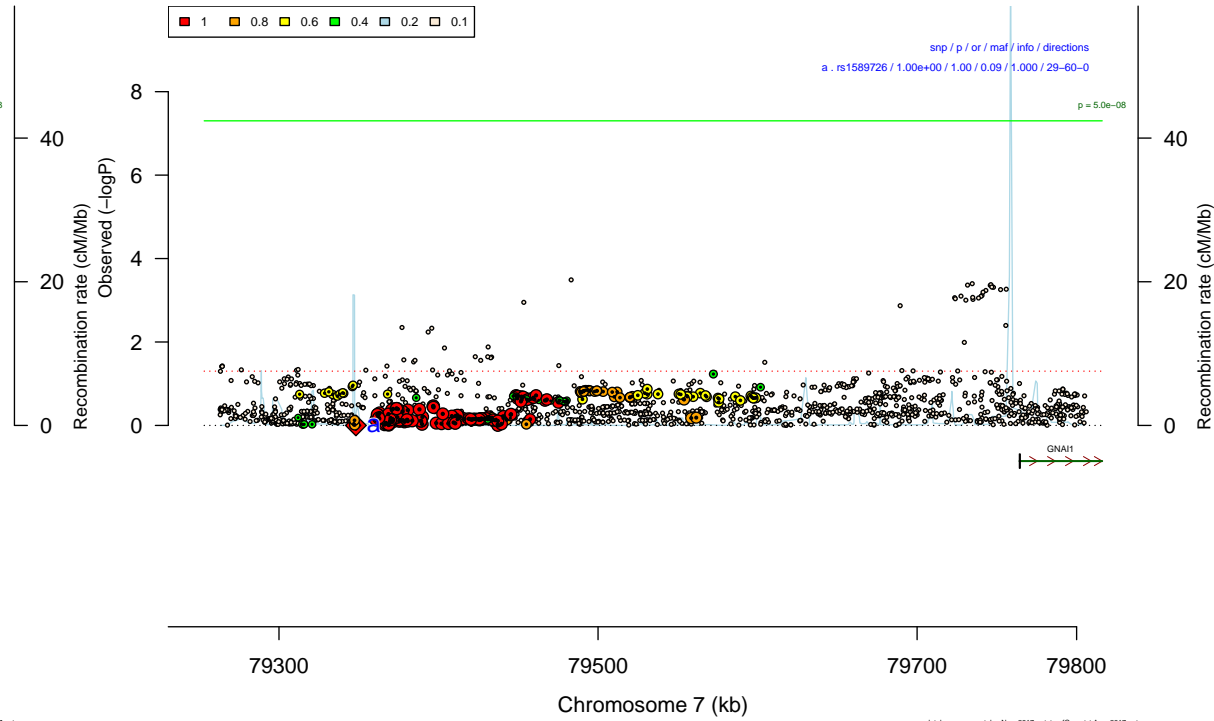

### SCZ\_uncond-rs578470-chr12

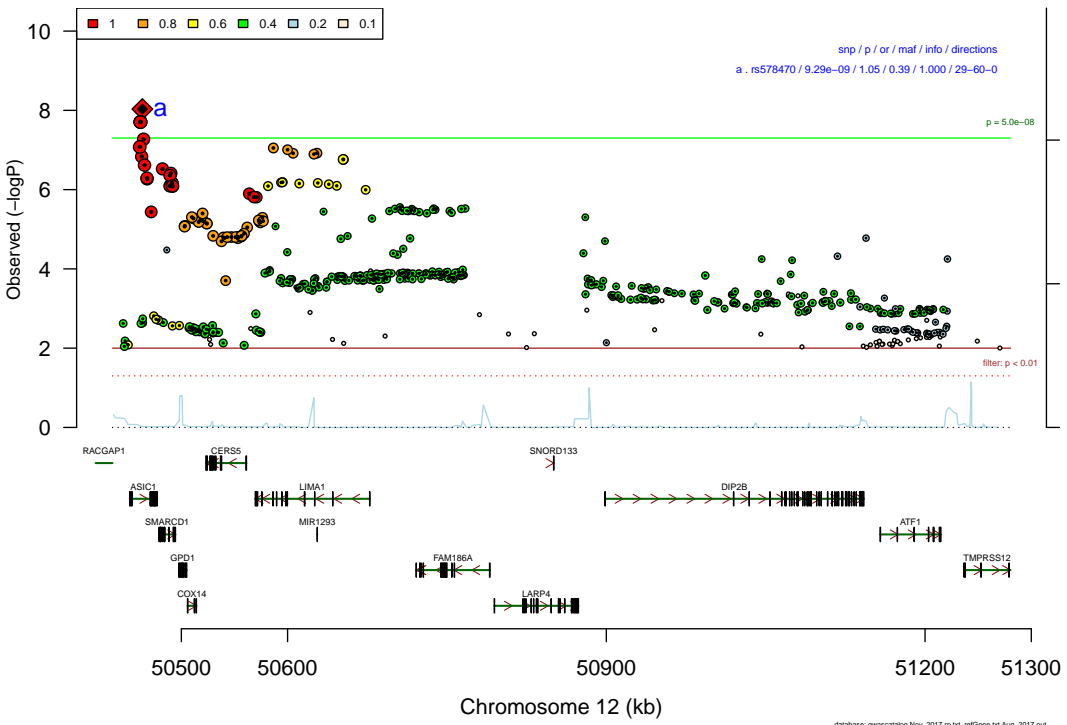

### SCZ\_cond\_rs578470-chr12

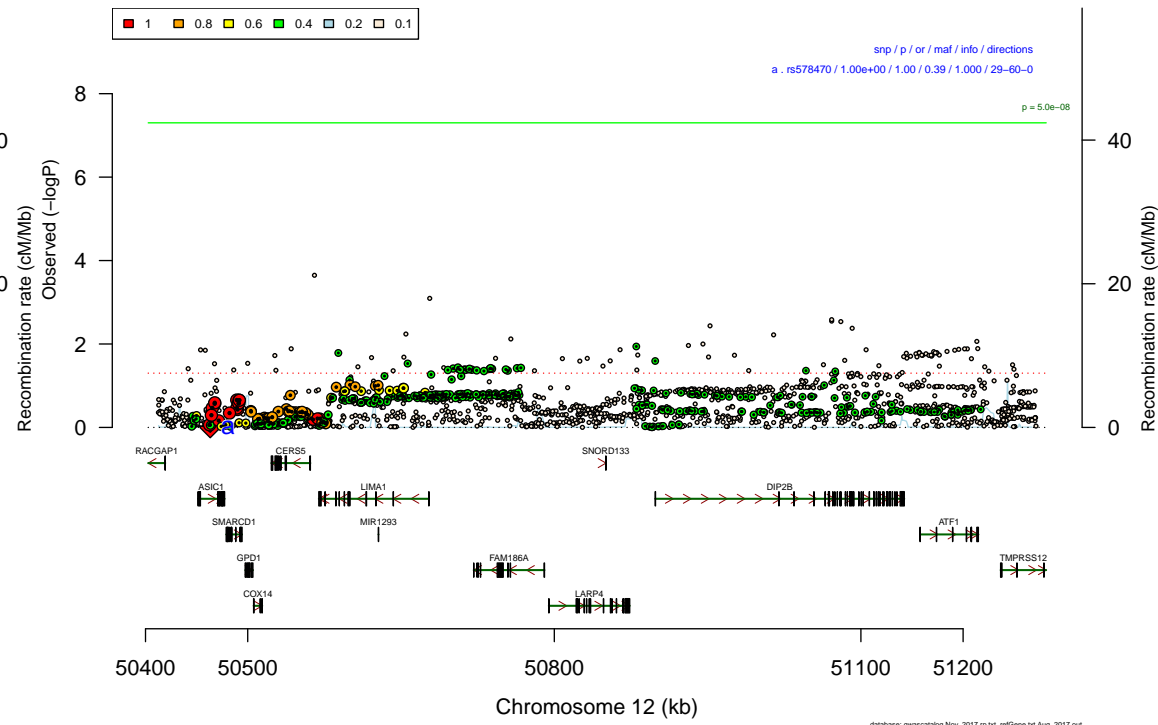



### SCZ\_uncond-rs72723227-chr5

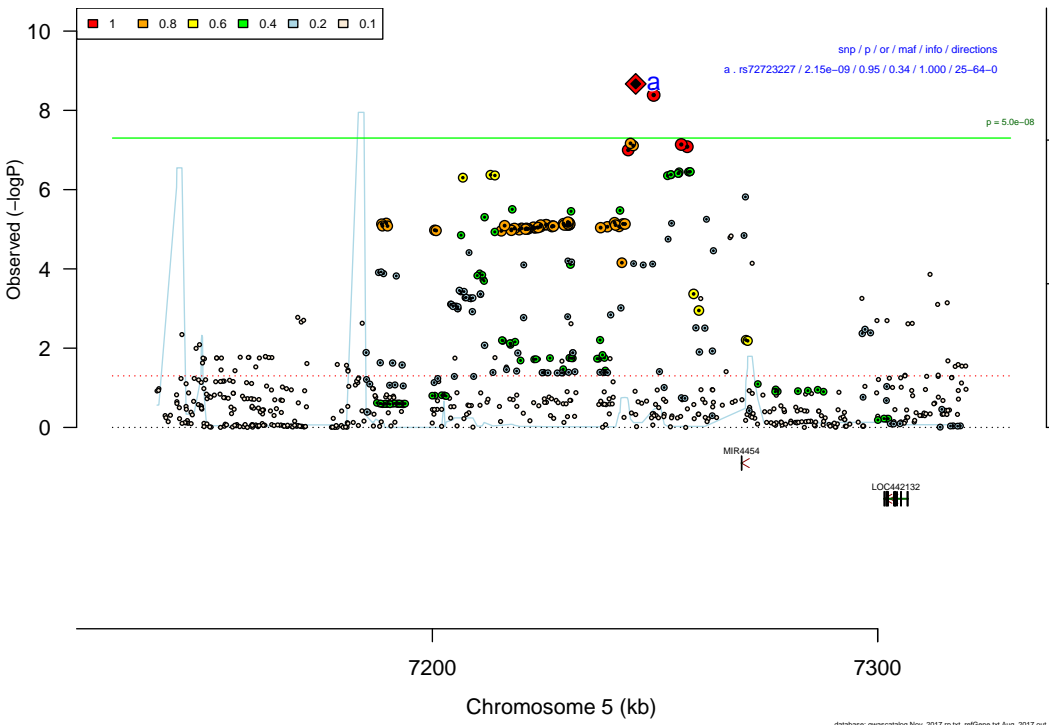

### SCZ\_cond\_rs72723227-chr5

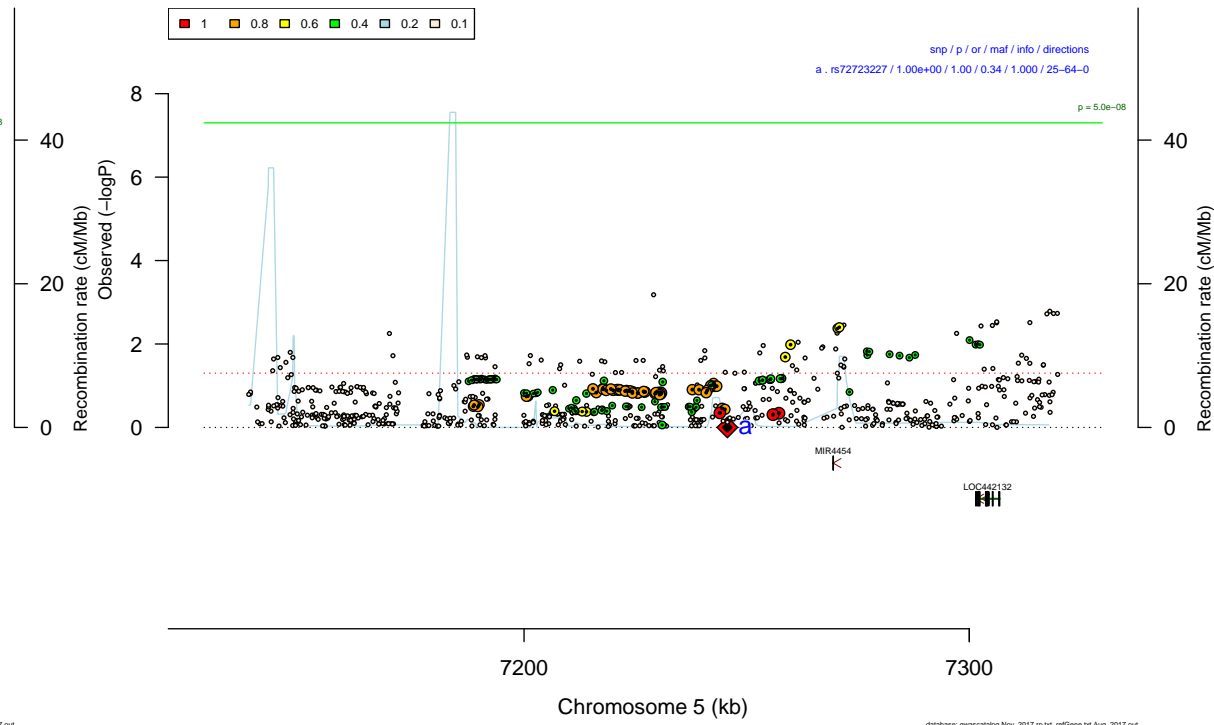

# SCZ\_uncond-rs62184960-chr2

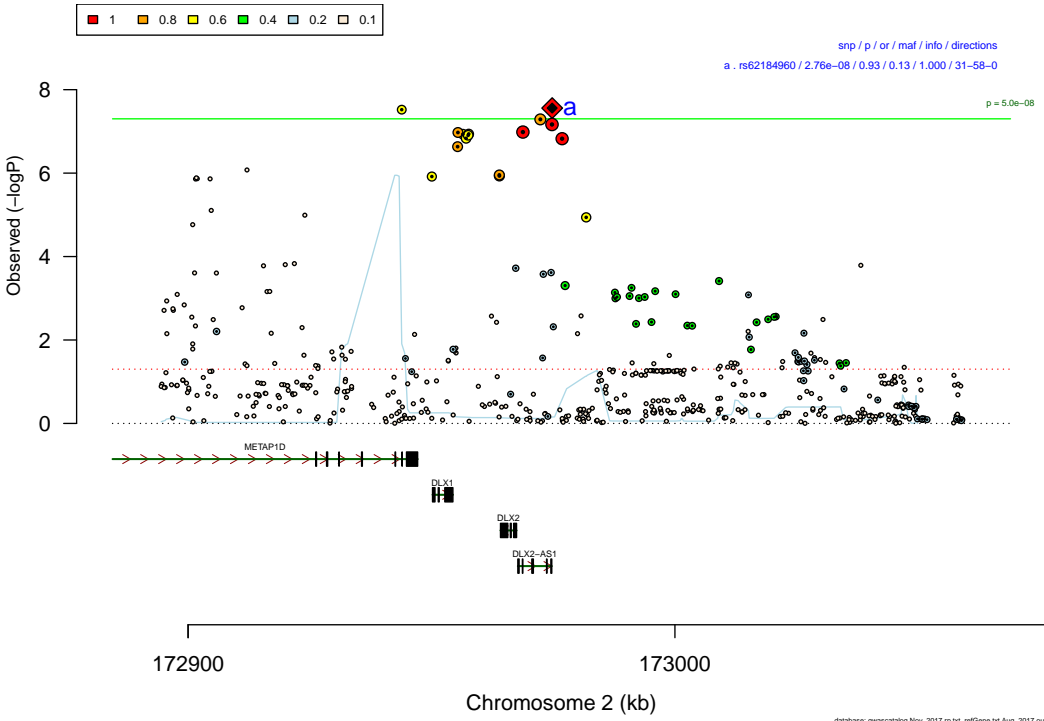

# SCZ\_cond\_rs62184960-chr2

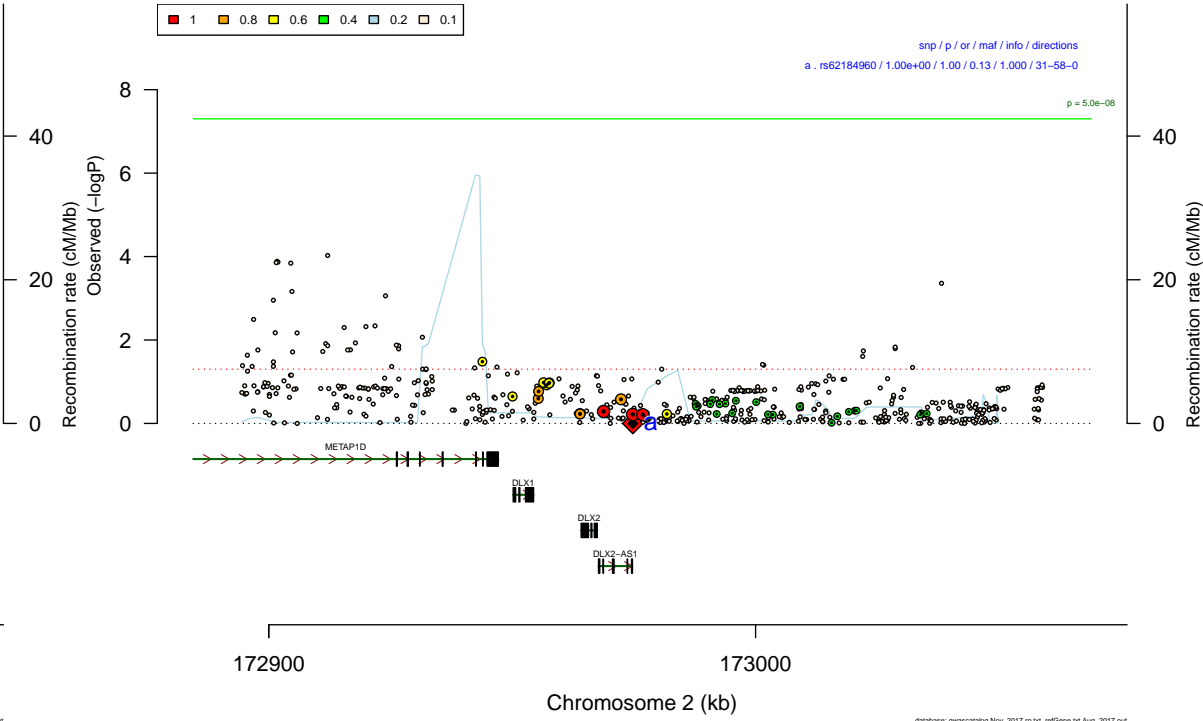

### SCZ\_uncond-rs2206956-chr6

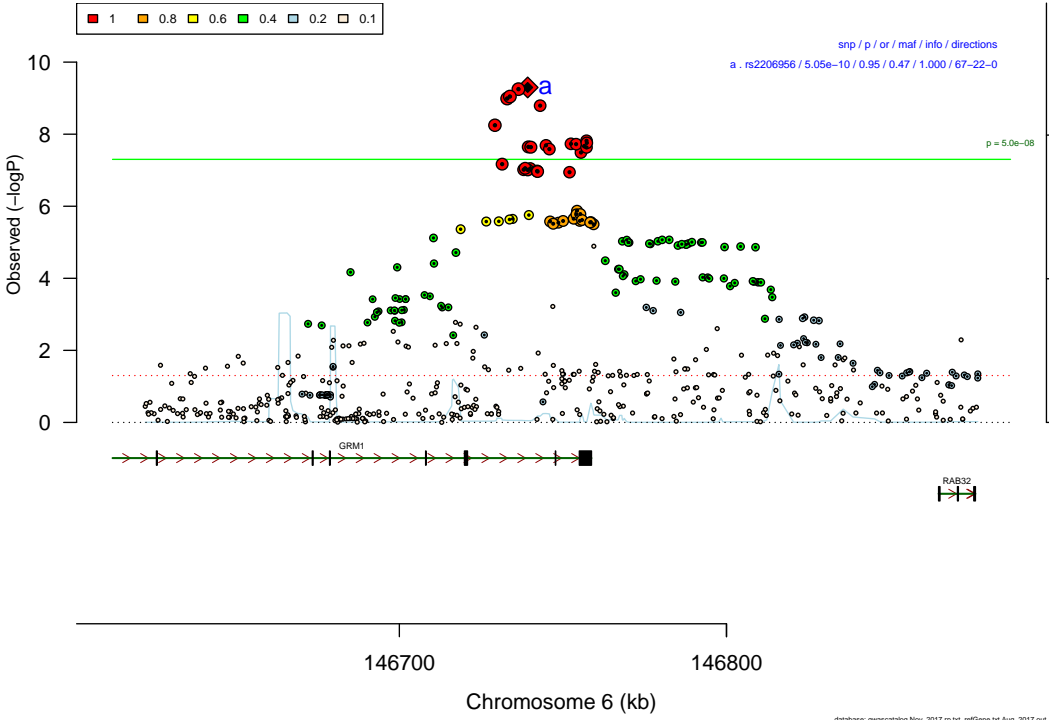

### SCZ\_cond\_rs2206956-chr6

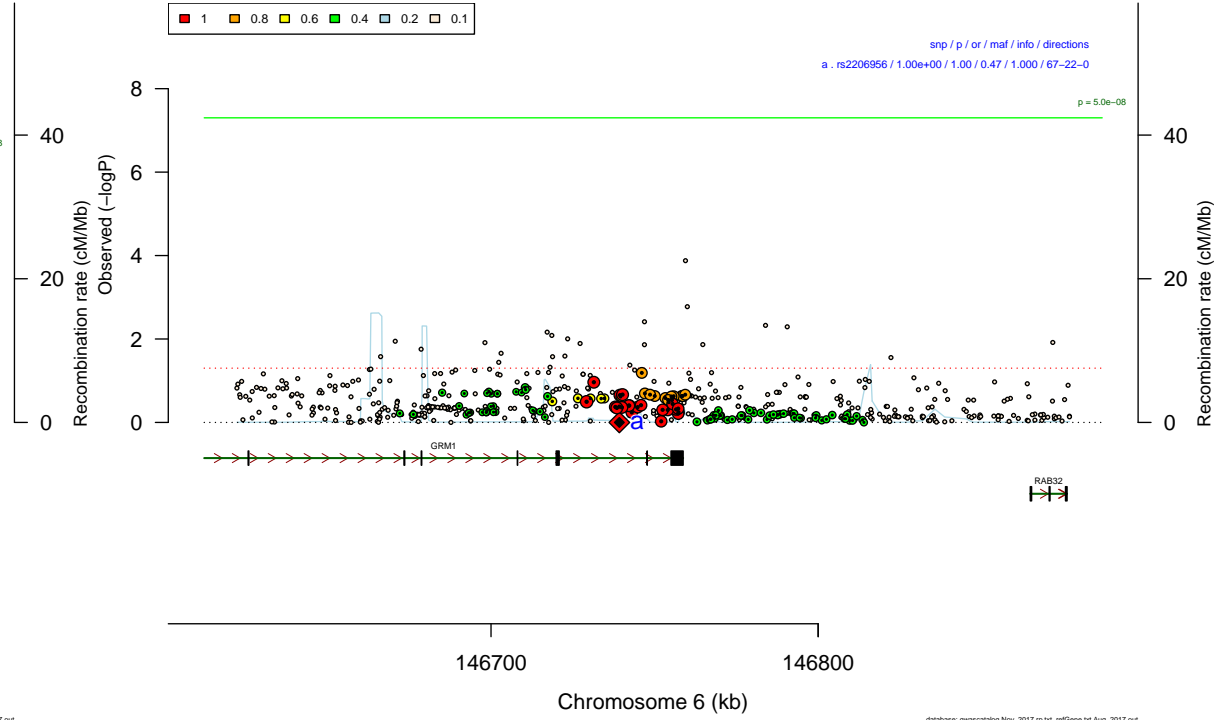

### SCZ\_uncond-rs2686386-chr12

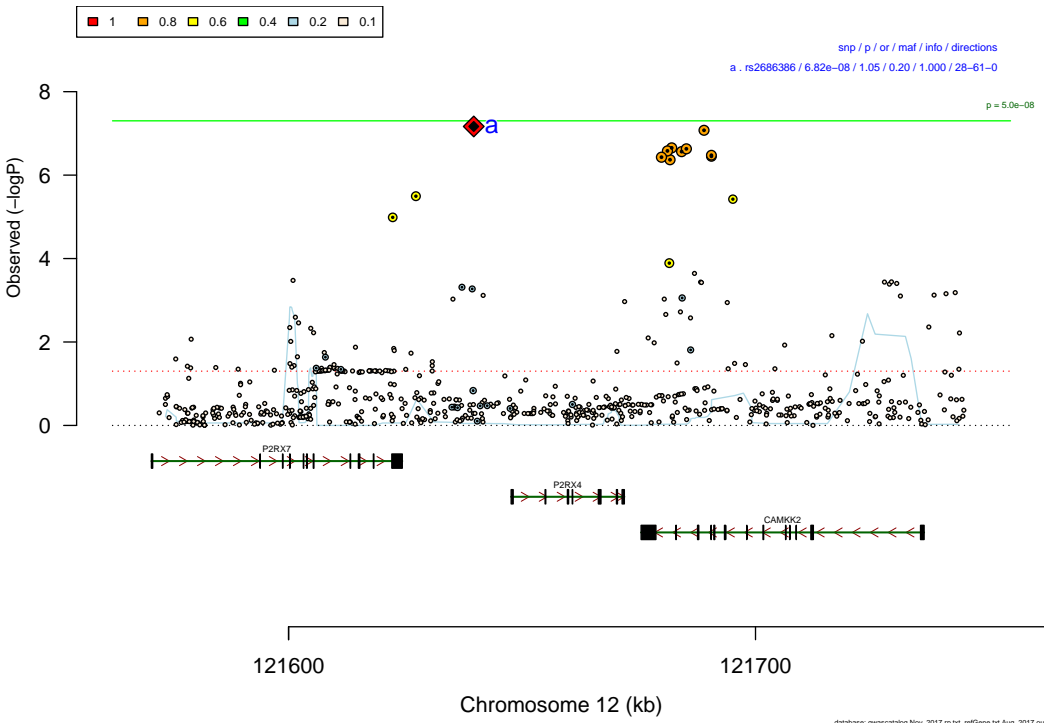

### SCZ\_cond\_rs2686386-chr12

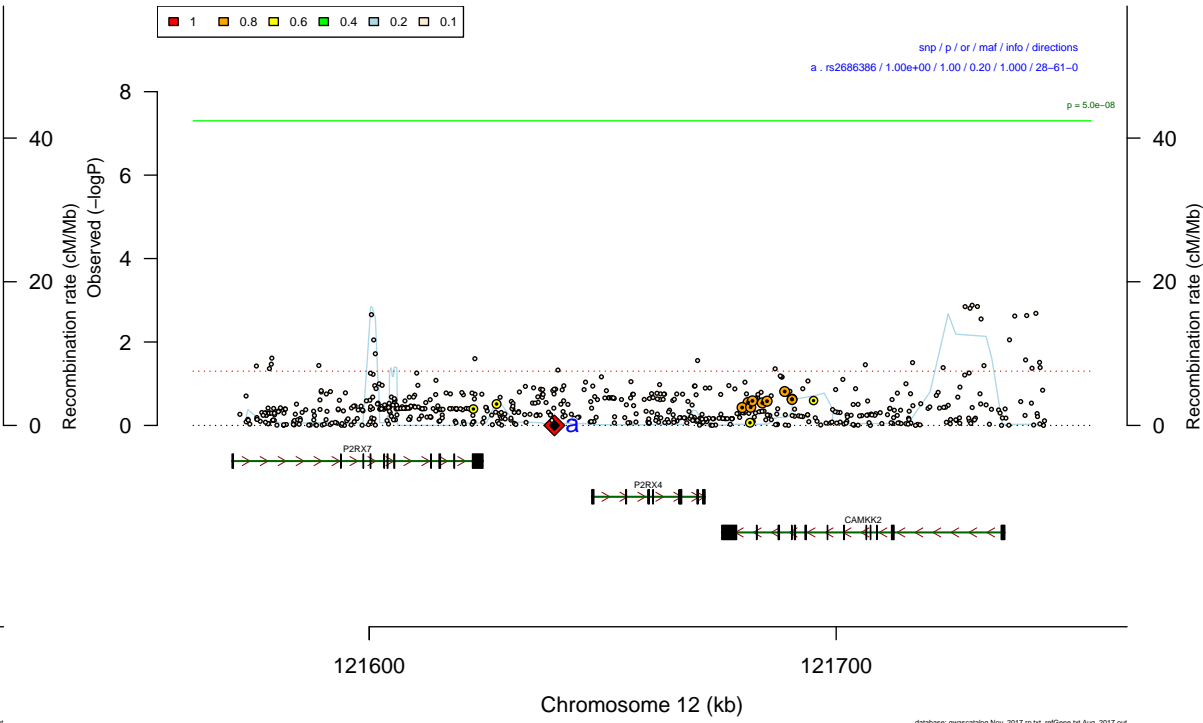

### SCZ\_uncond-rs58950470-chr11

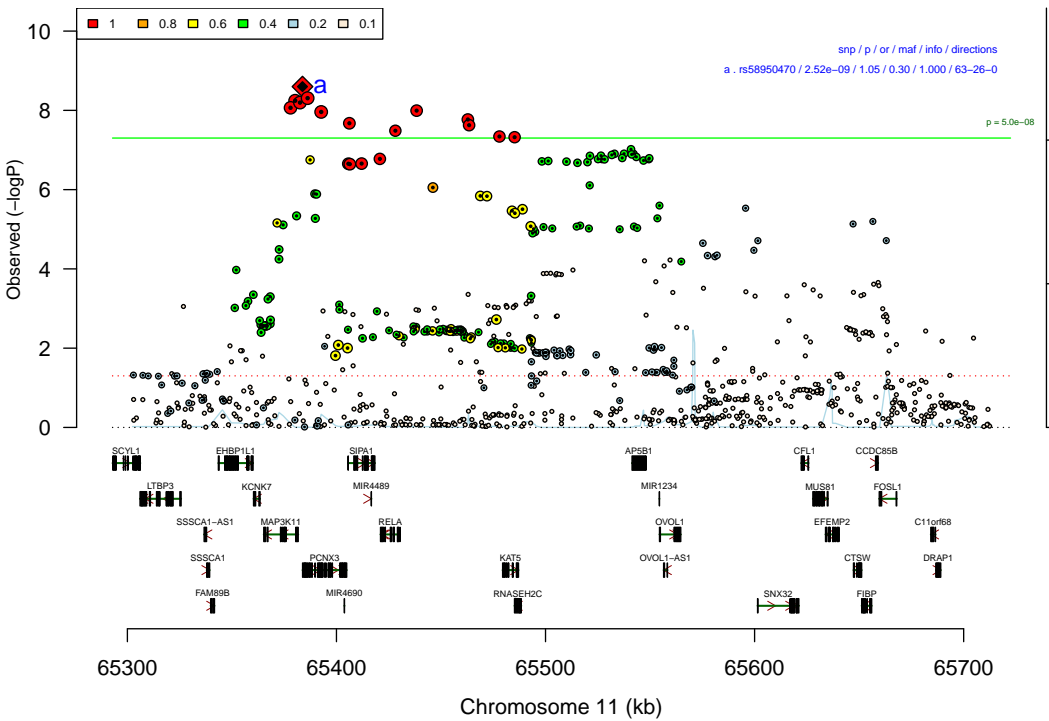

### SCZ\_cond\_rs58950470-chr11

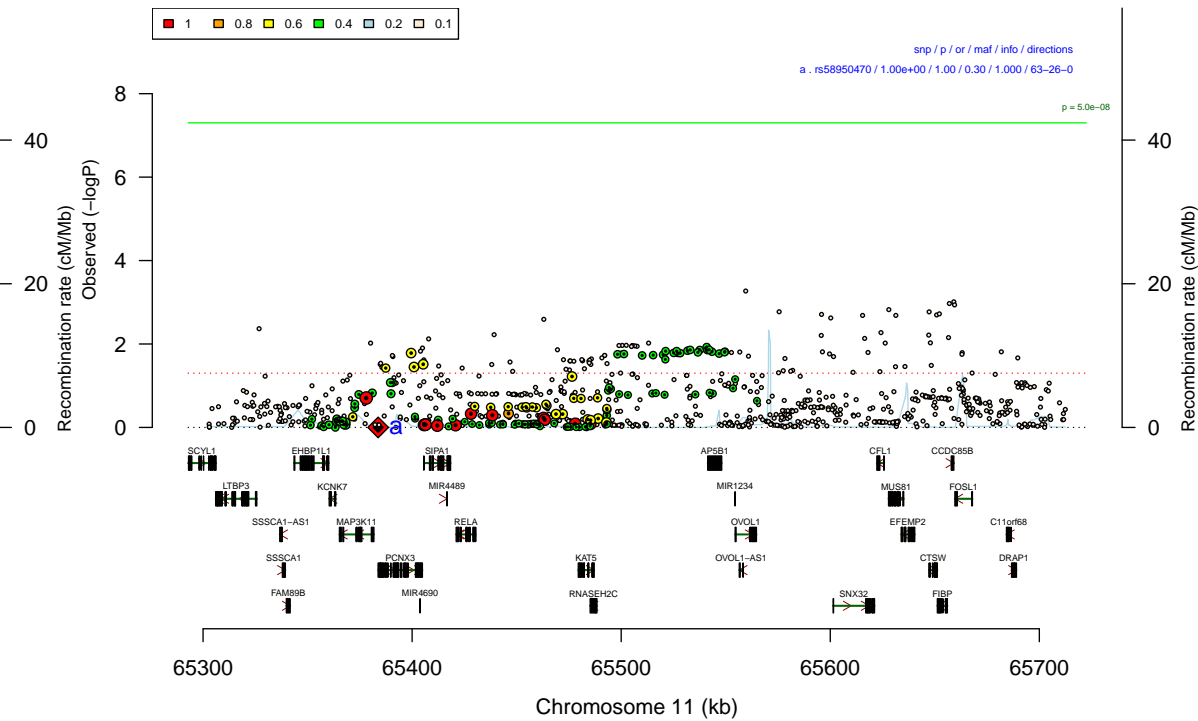

### SCZ\_uncond-rs3739554-chr9

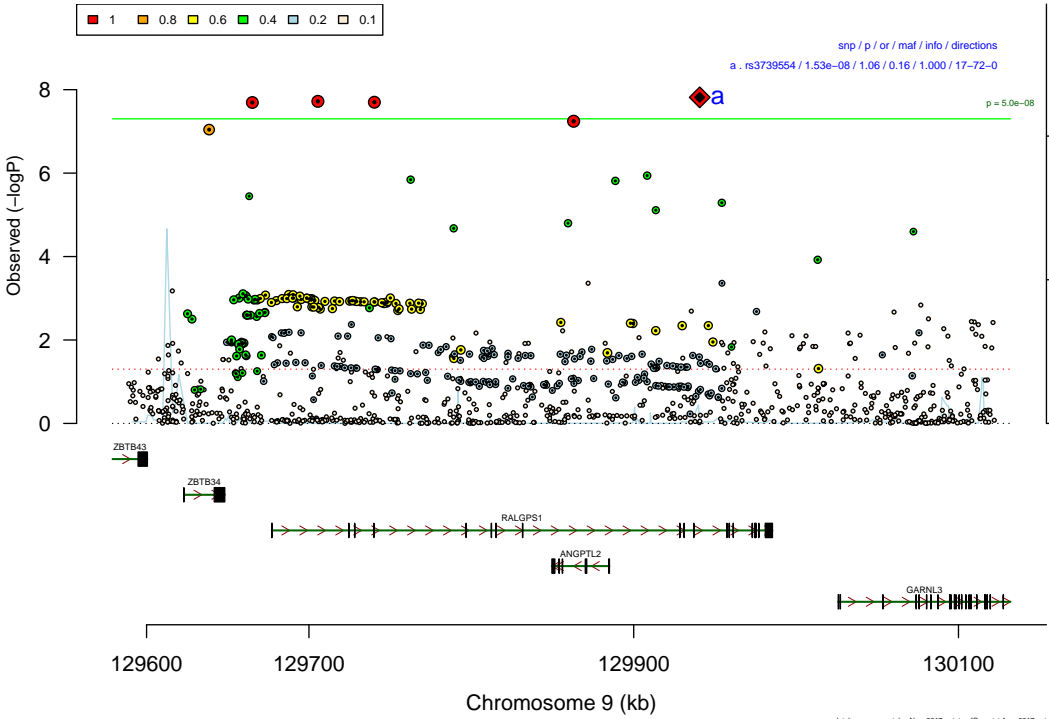

### SCZ\_cond\_rs3739554-chr9

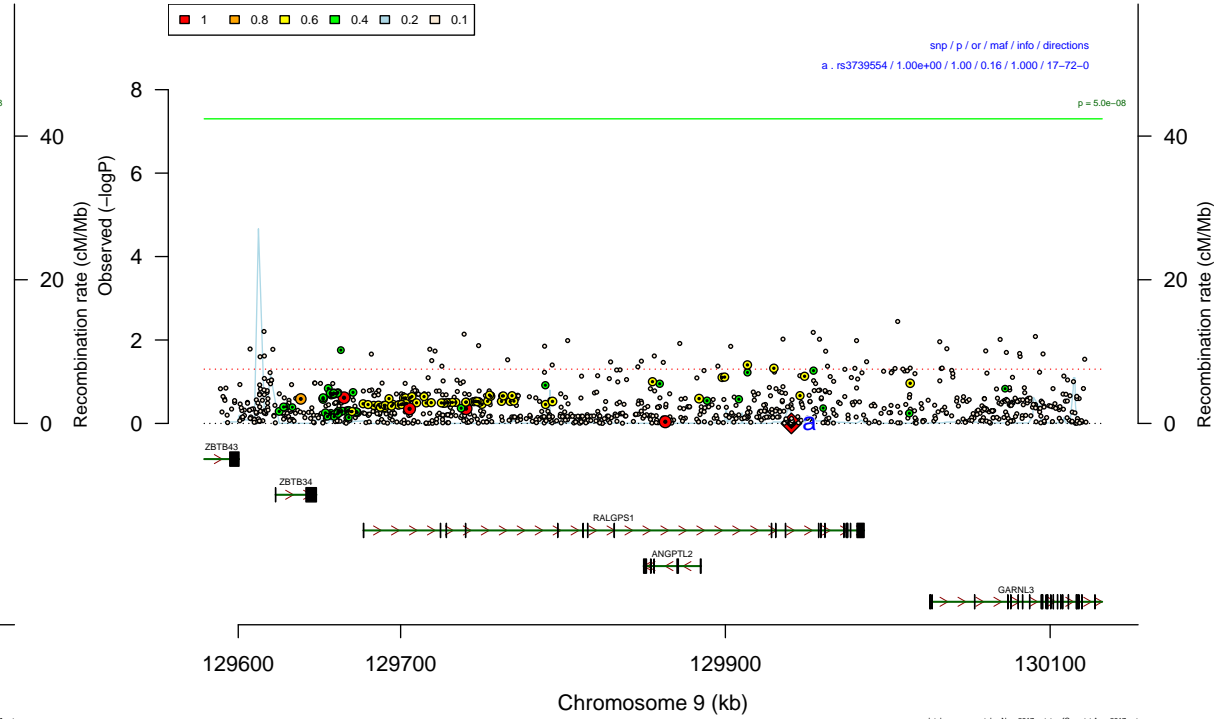

### SCZ\_uncond-rs4632195-chr18

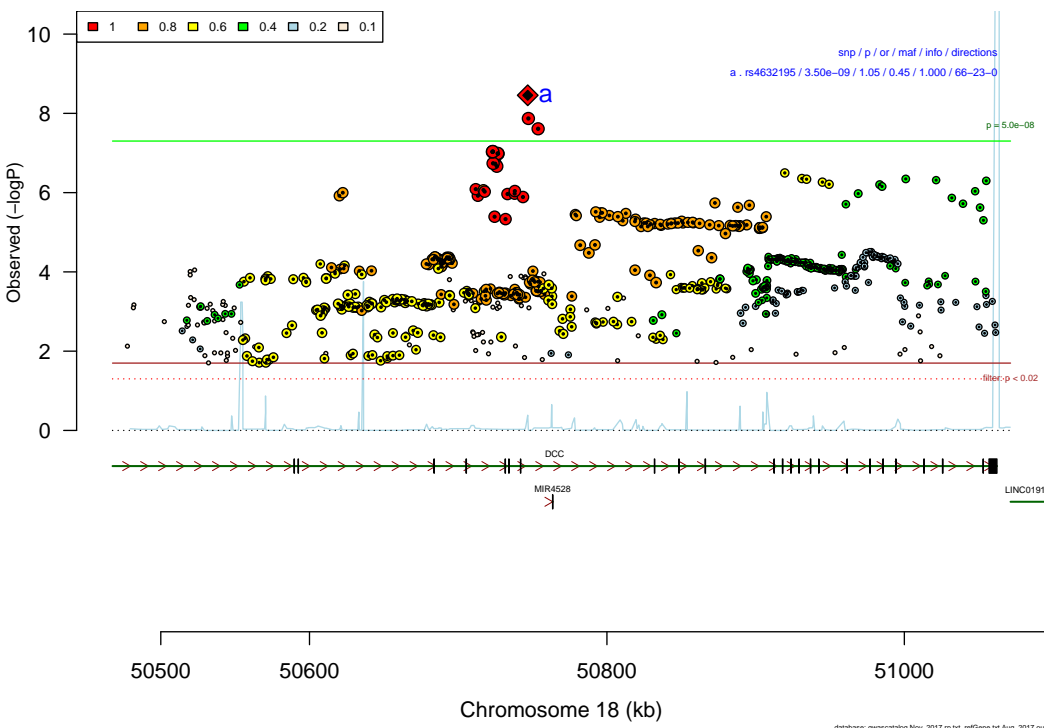

### SCZ\_cond\_rs4632195-chr18

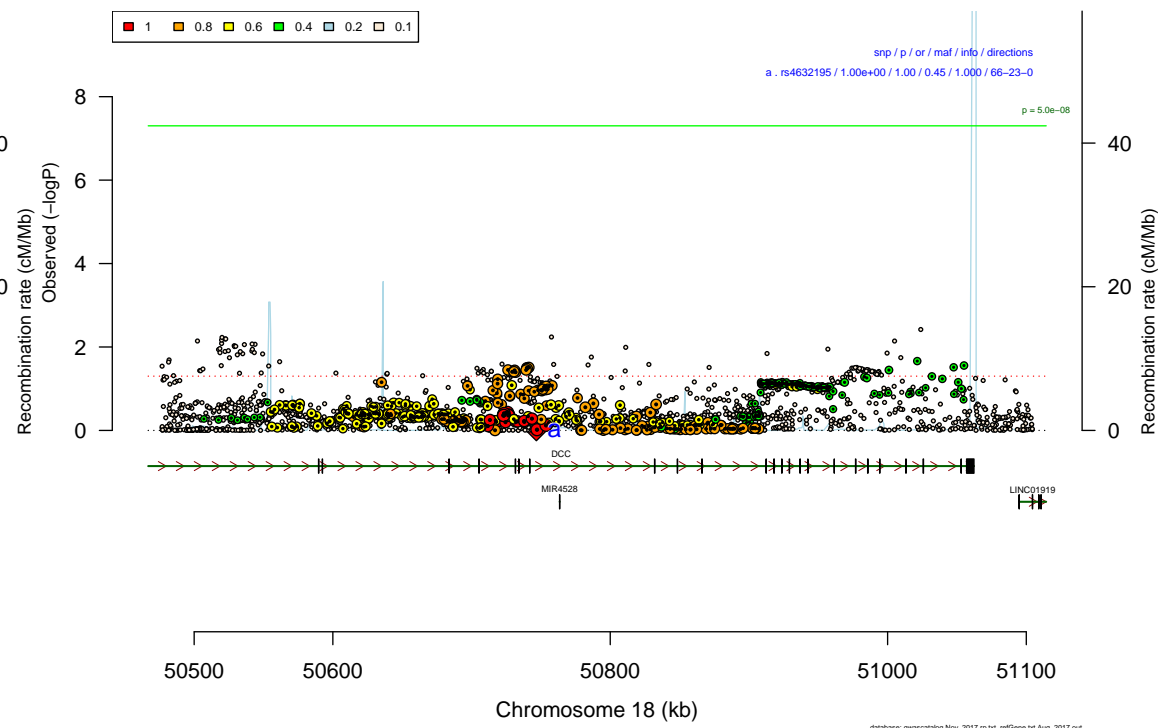

### SCZ\_uncond-rs28521069-chr4

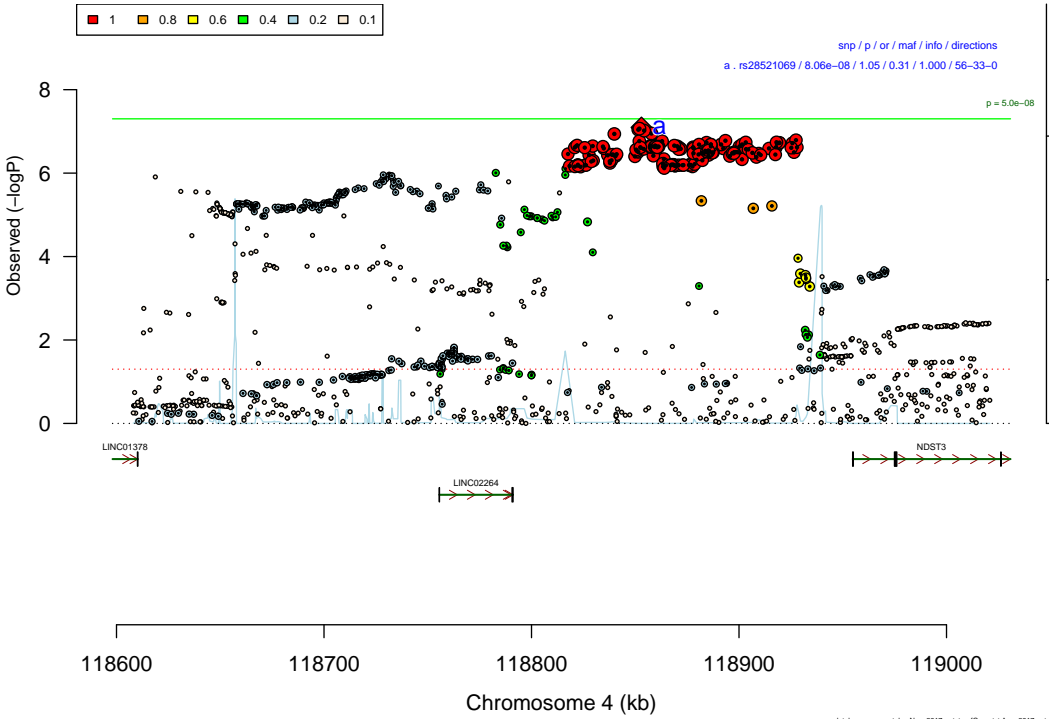

### SCZ\_cond\_rs28521069-chr4

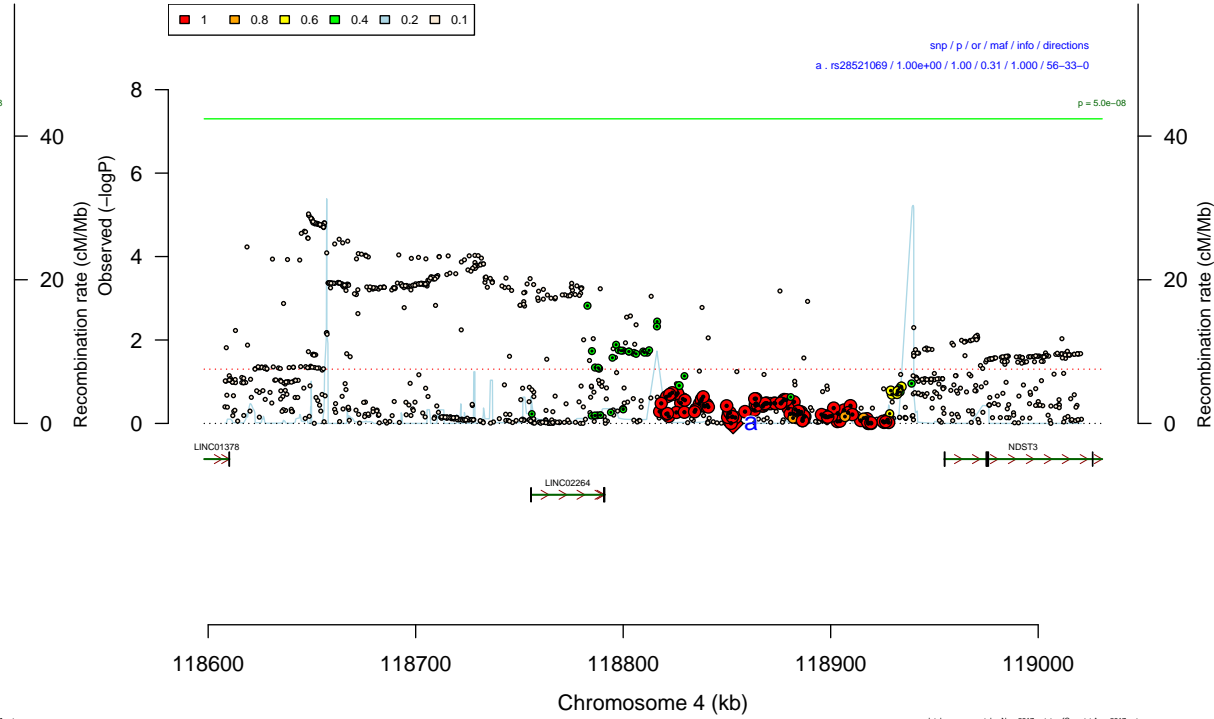



### SCZ\_uncond-rs10894308-chr11

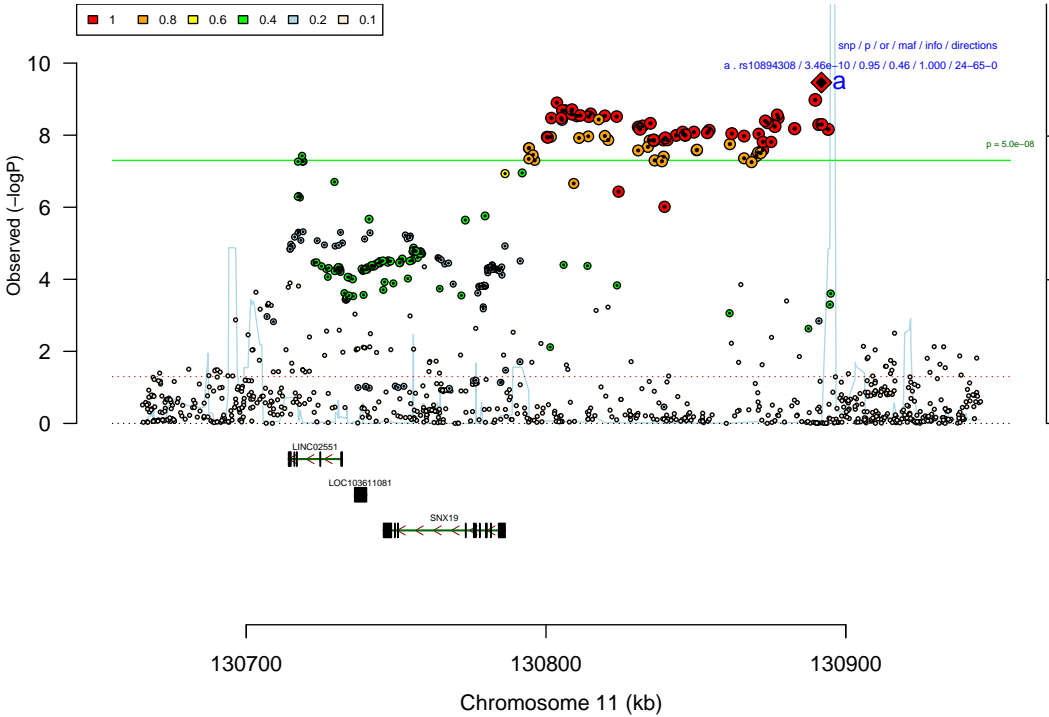

### SCZ\_cond\_rs10894308-chr11

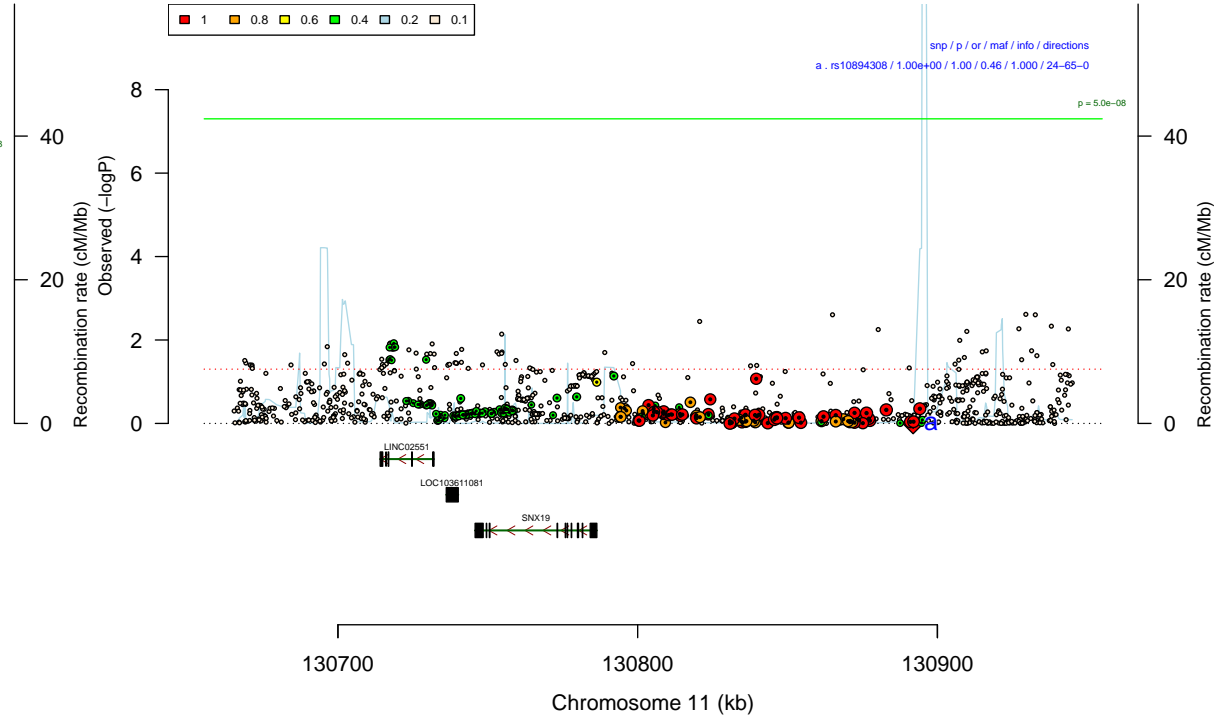

### SCZ\_uncond-rs9569820-chr13

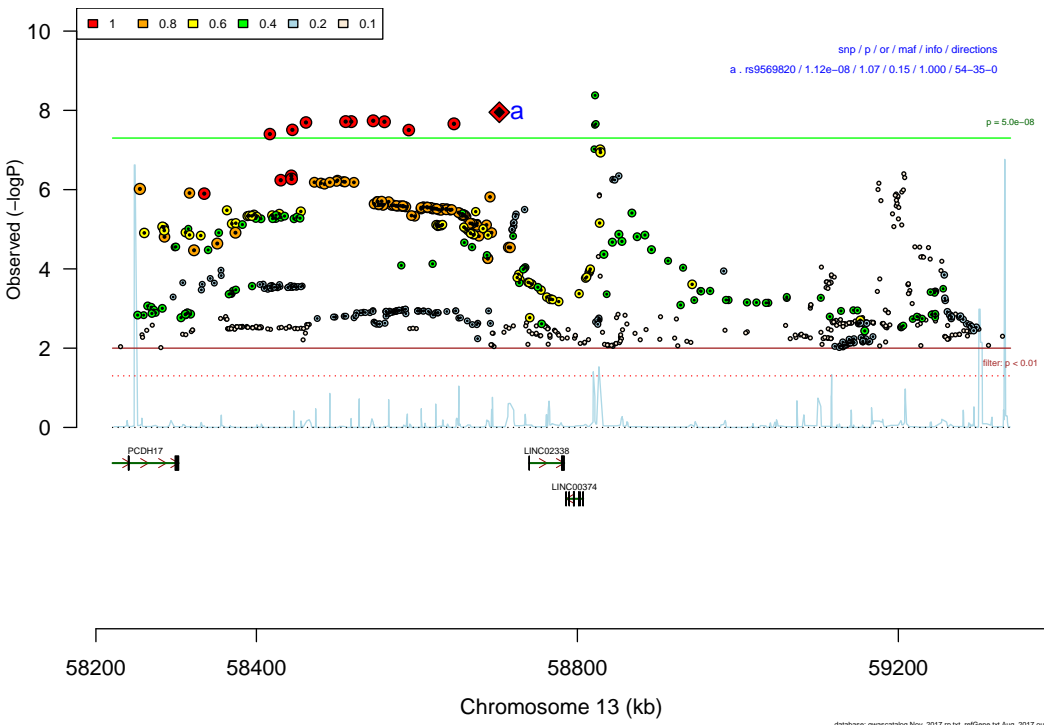

### SCZ\_cond\_rs9569820-chr13

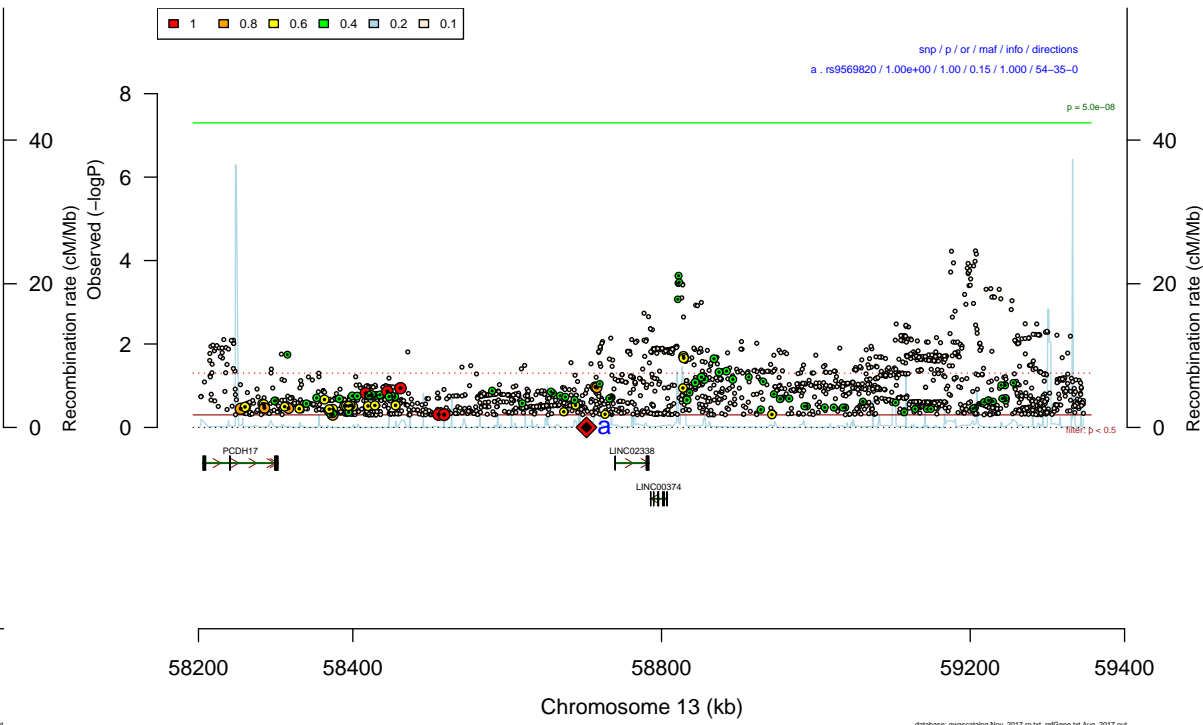

### SCZ\_uncond-rs12712510-chr2

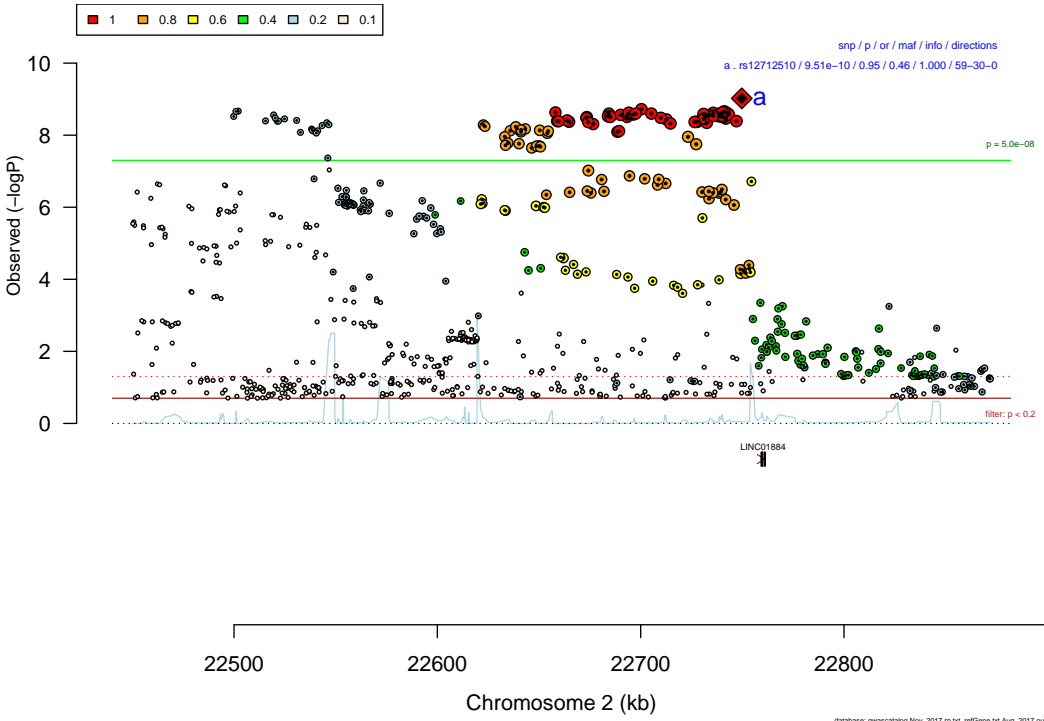

### SCZ\_cond\_rs12712510-chr2

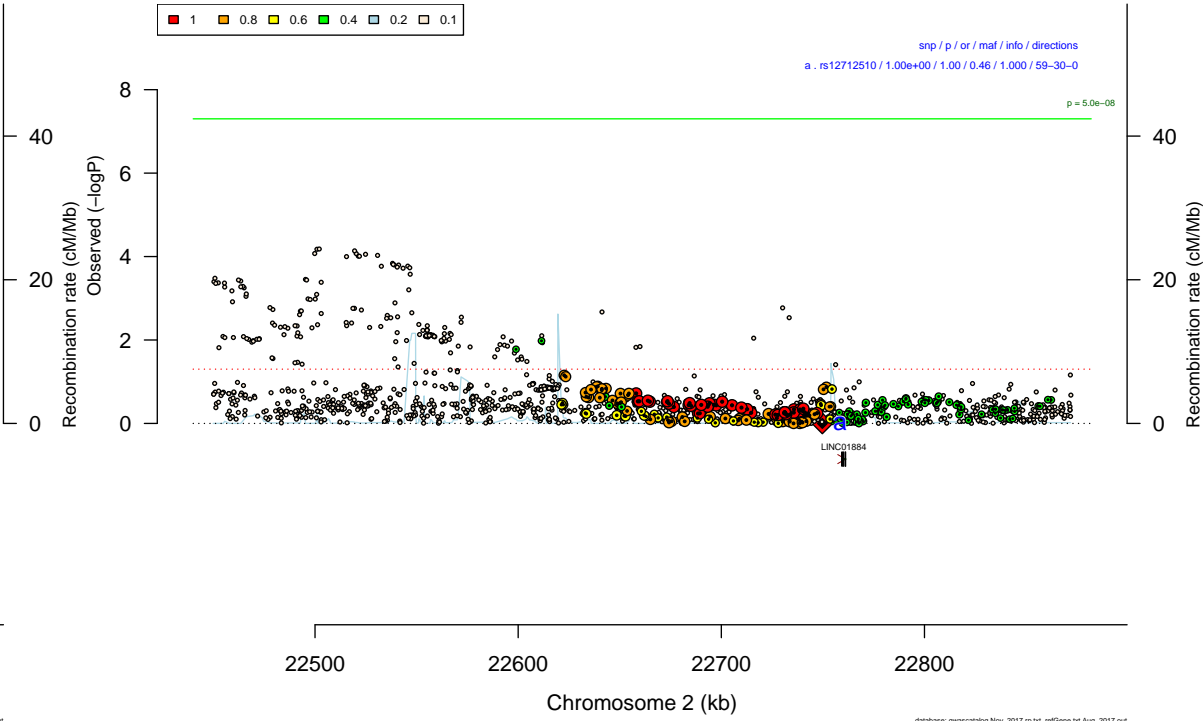

### SCZ\_uncond-rs356183-chr4

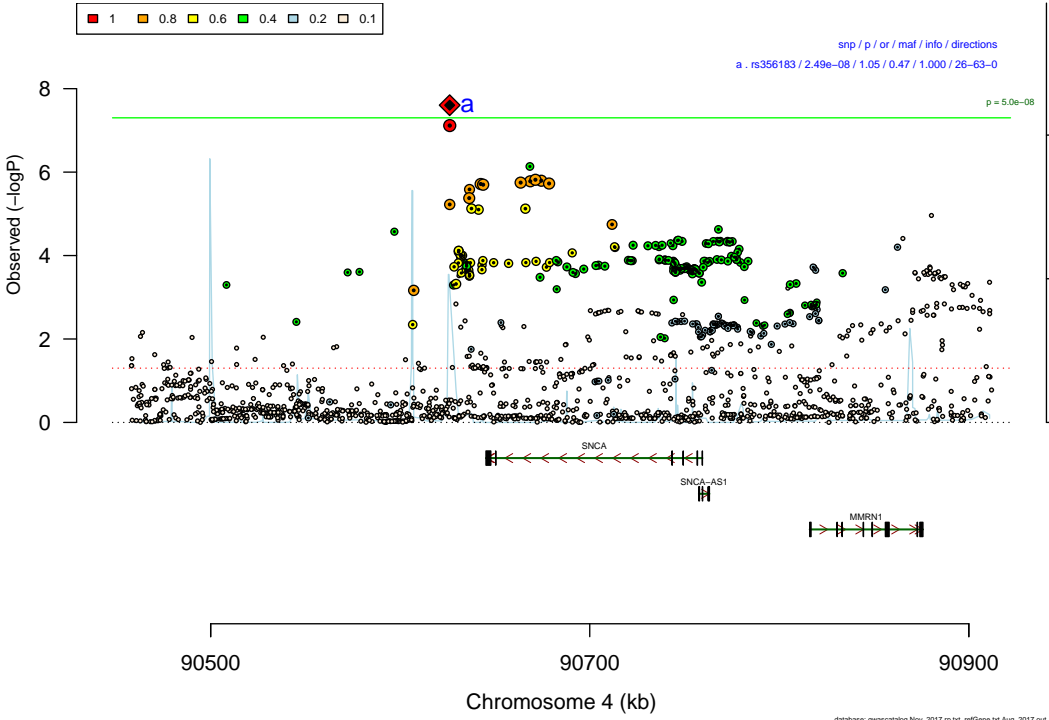

### SCZ\_cond\_rs356183-chr4

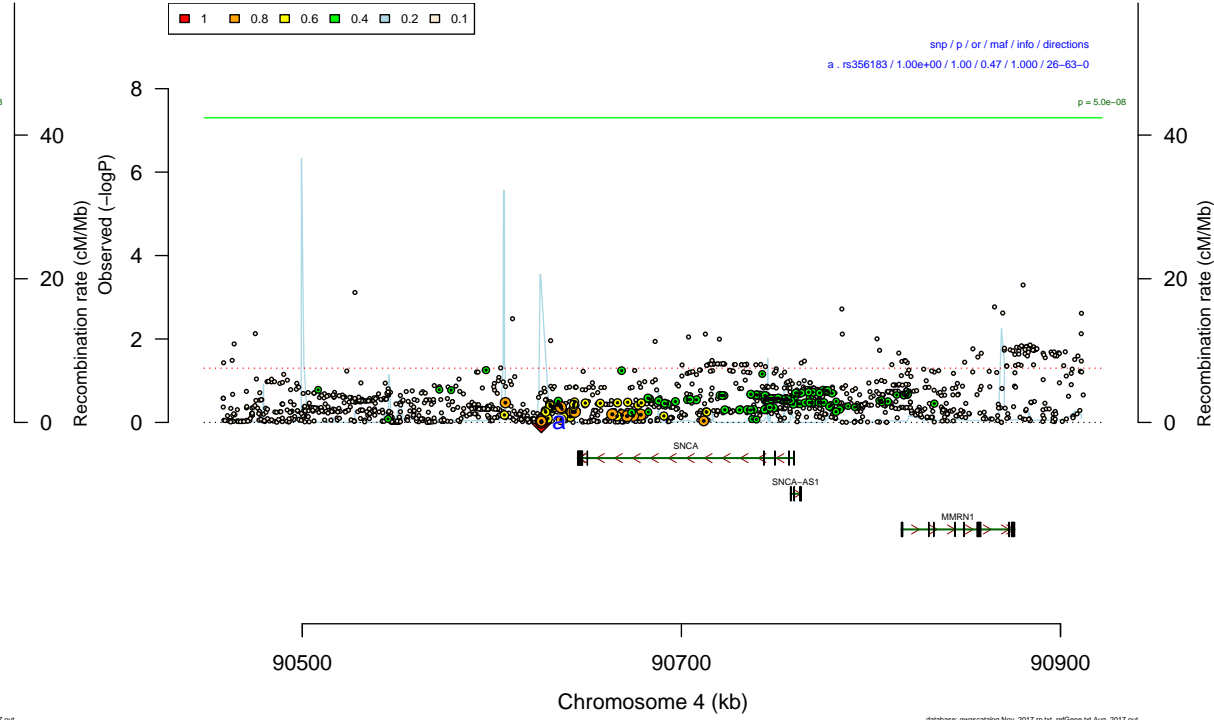

### SCZ\_uncond-rs3764002-chr12

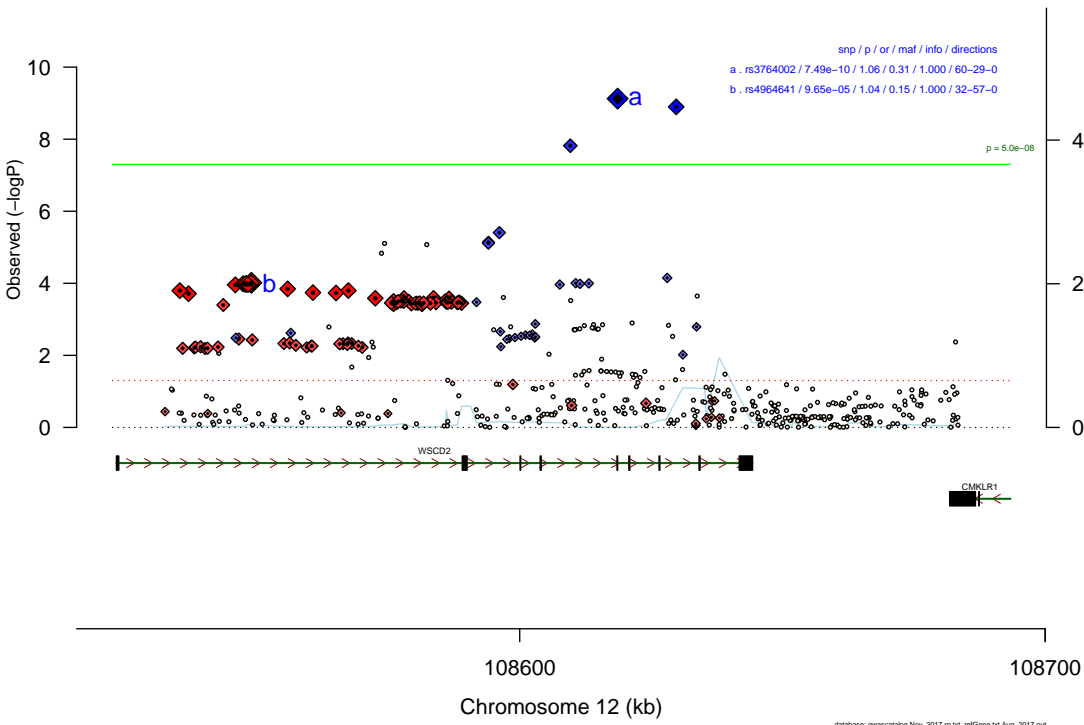

### SCZ\_cond\_rs3764002-chr12

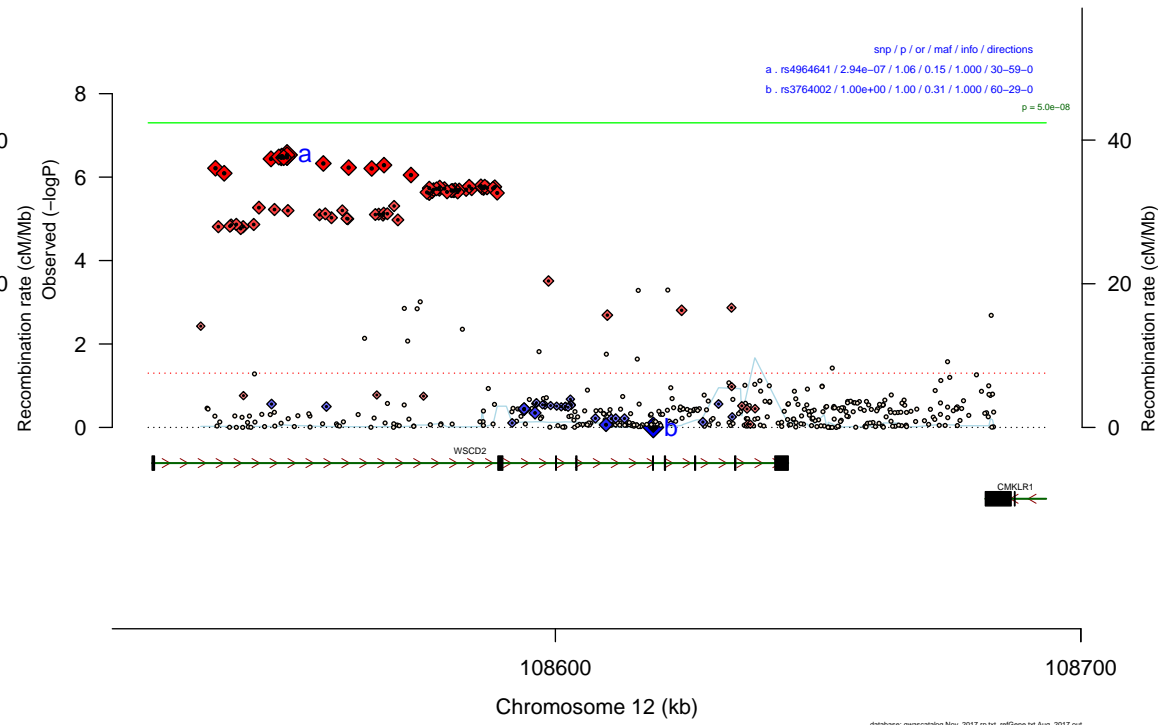

### SCZ\_cond\_rs3764002-rs4964641-chr12

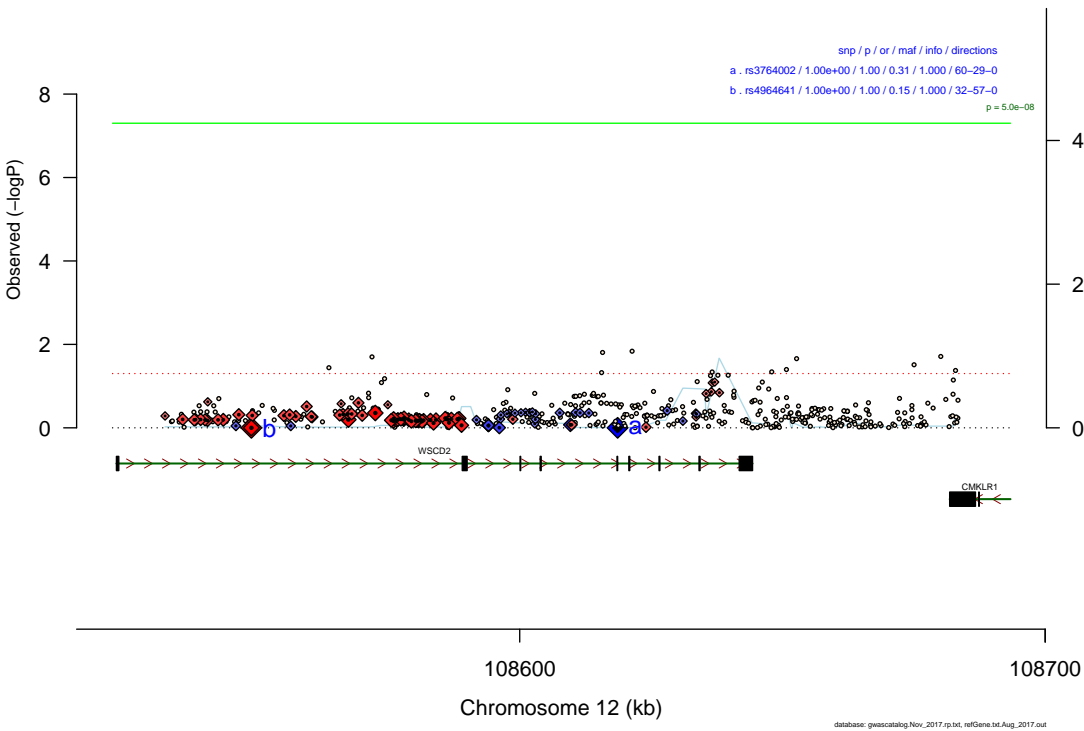

### SCZ\_uncond-rs35792732-chr7

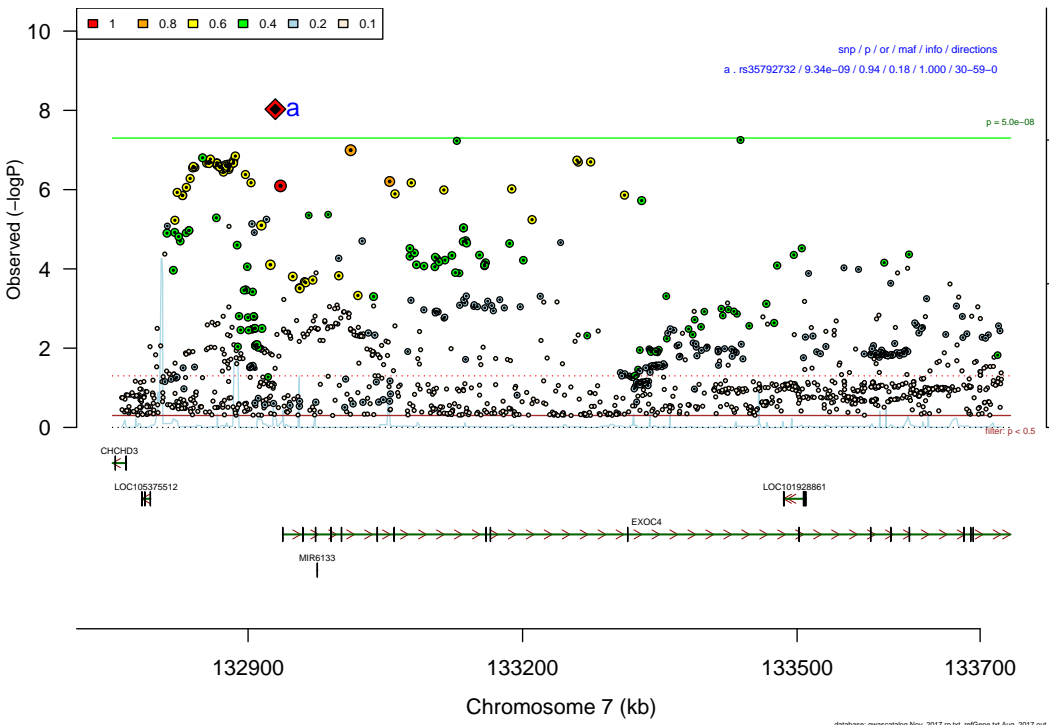

### SCZ\_cond\_rs35792732-chr7

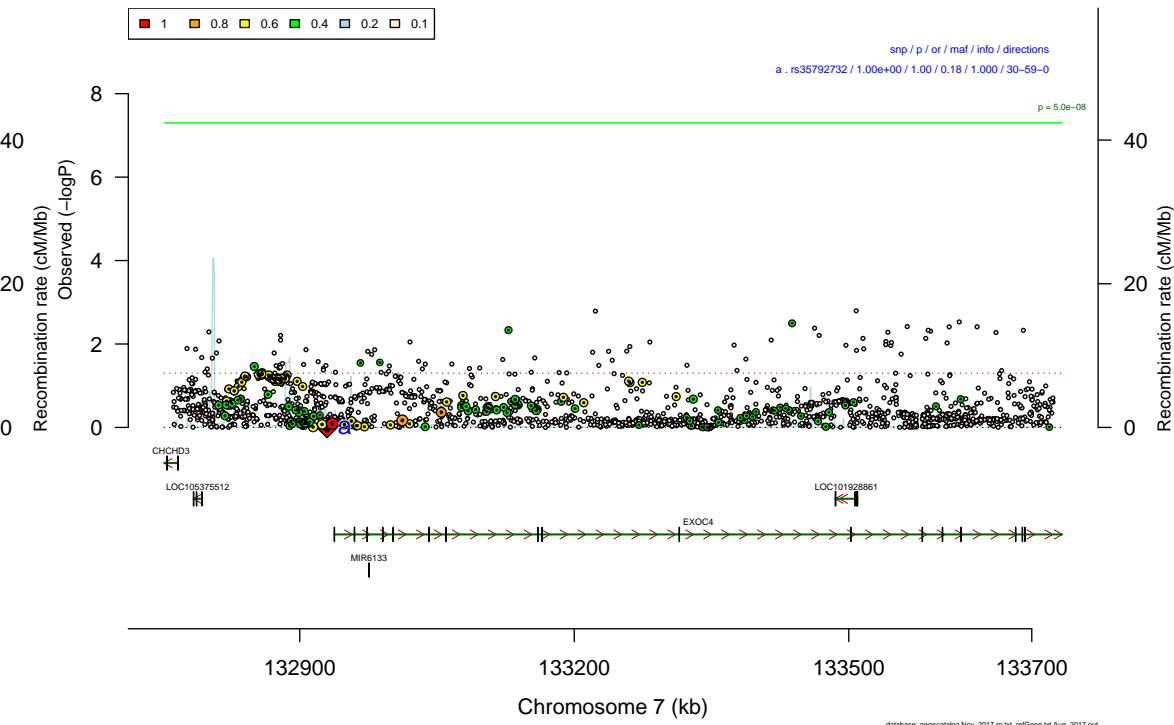

### SCZ\_uncond-rs1463209-chr12

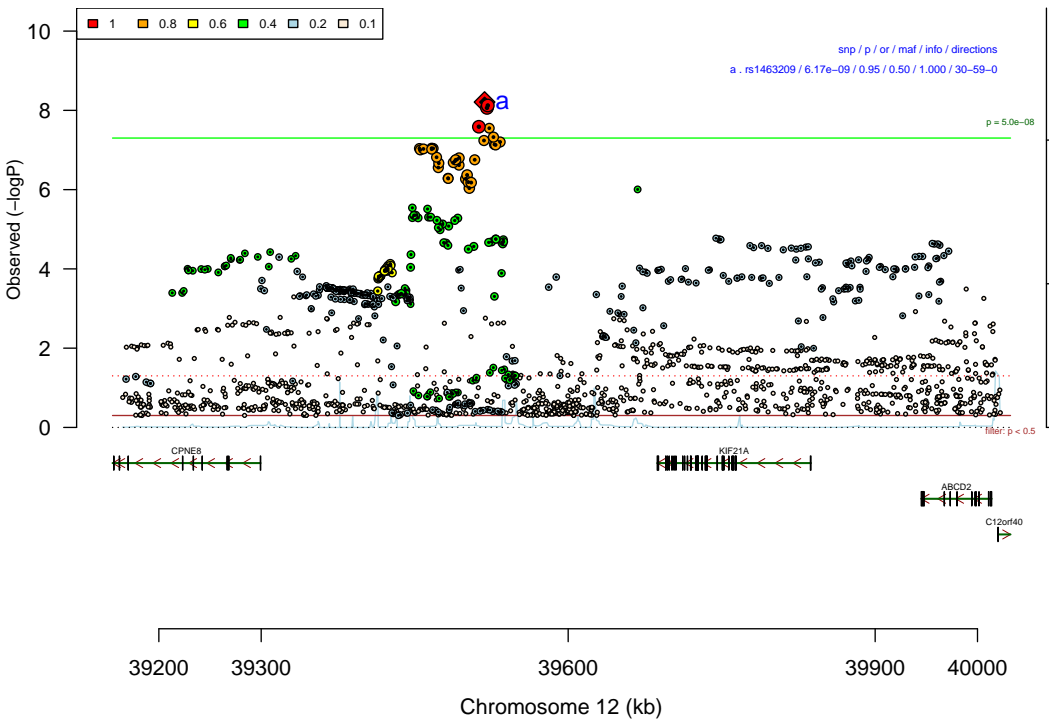

### SCZ\_cond\_rs1463209-chr12

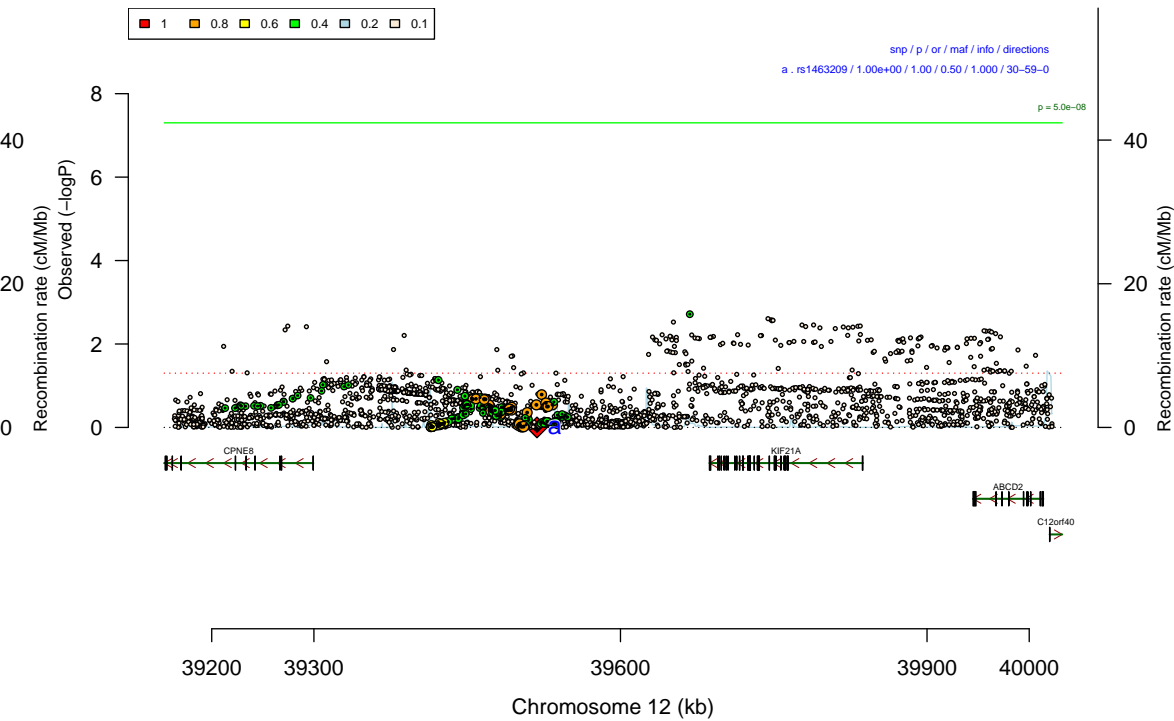

### SCZ\_uncond-rs9687282-chr5

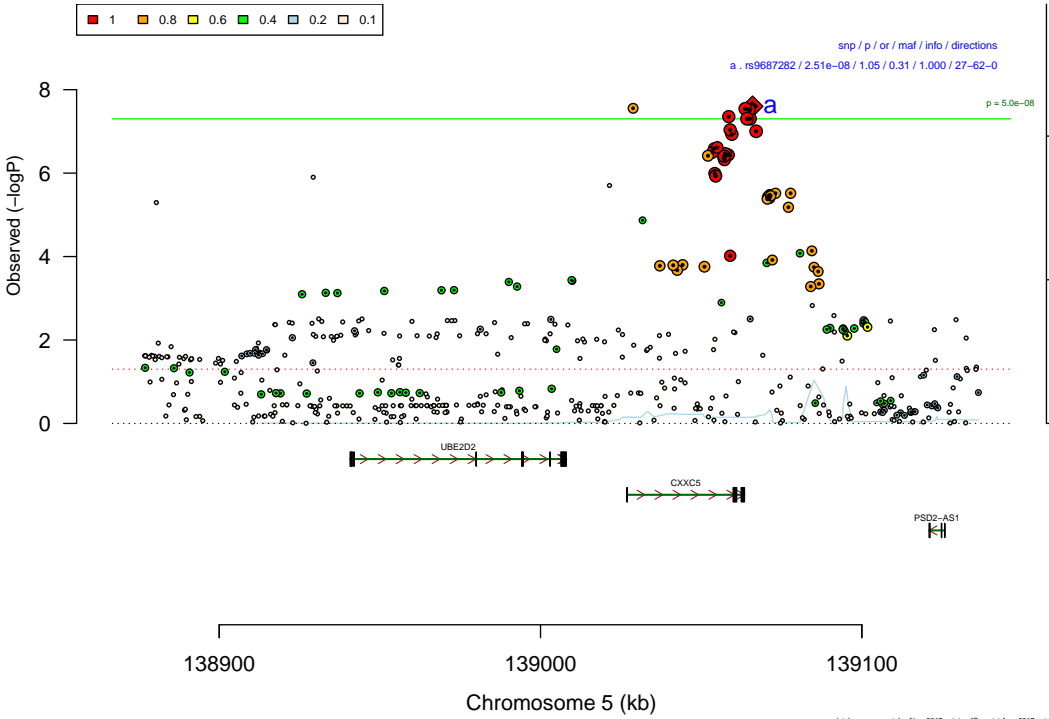

### SCZ\_cond\_rs9687282-chr5

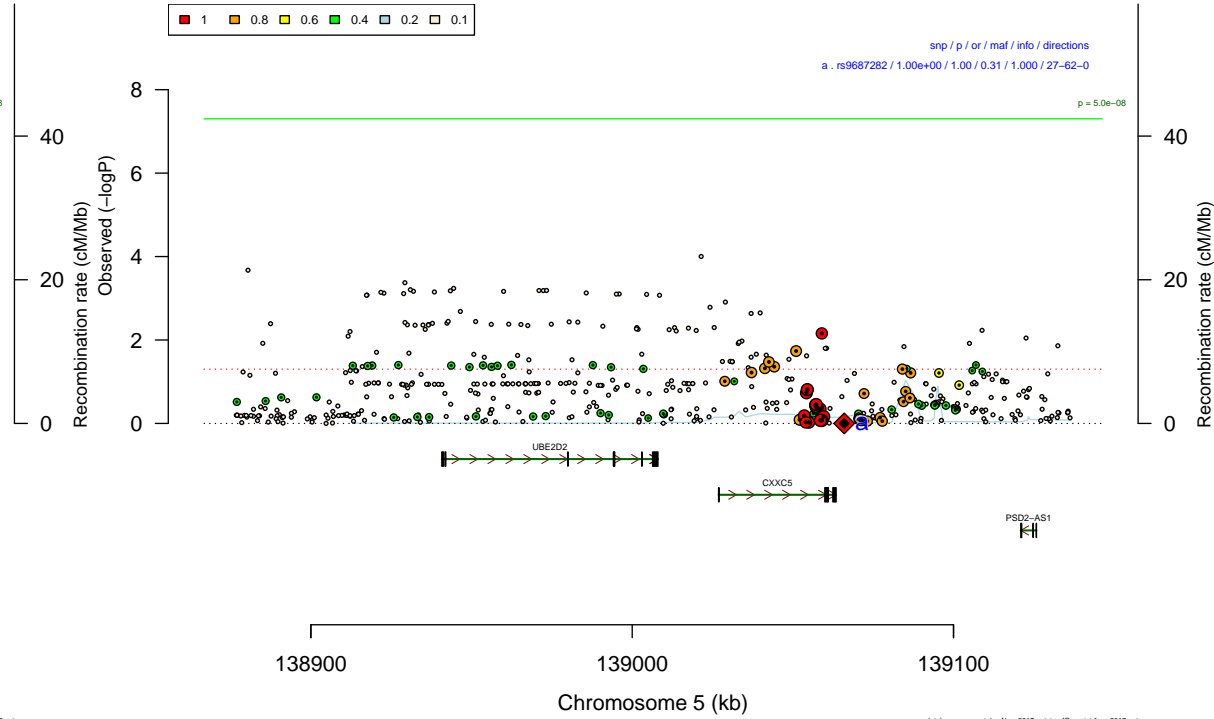



### SCZ\_uncond-rs12431743-chr14

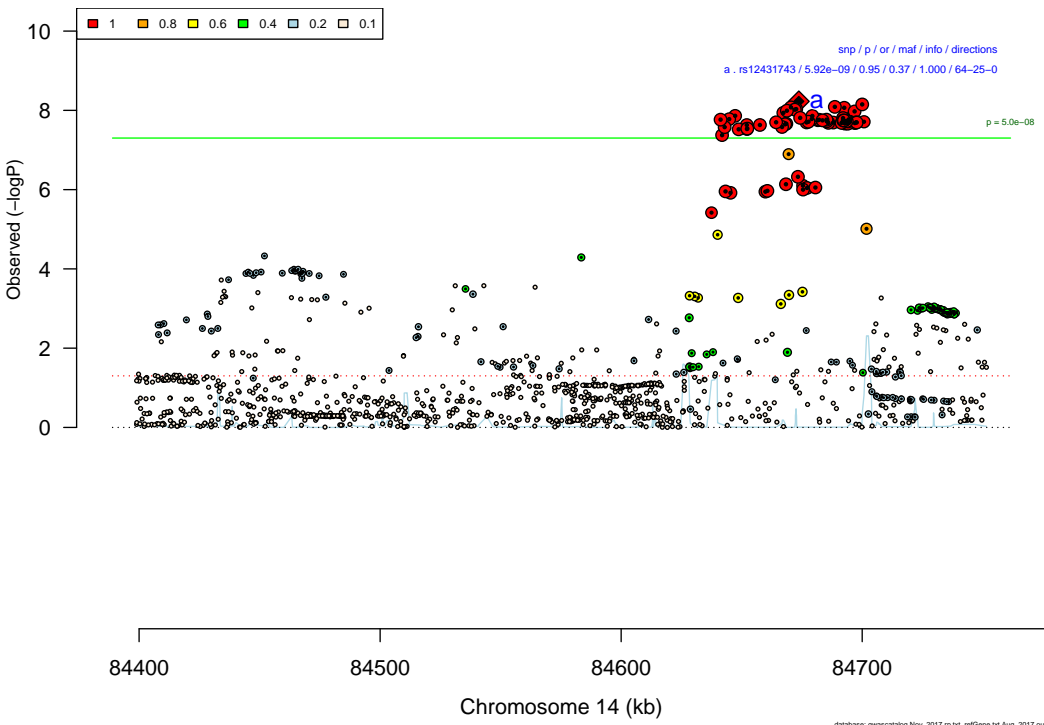

### SCZ\_cond\_rs12431743-chr14

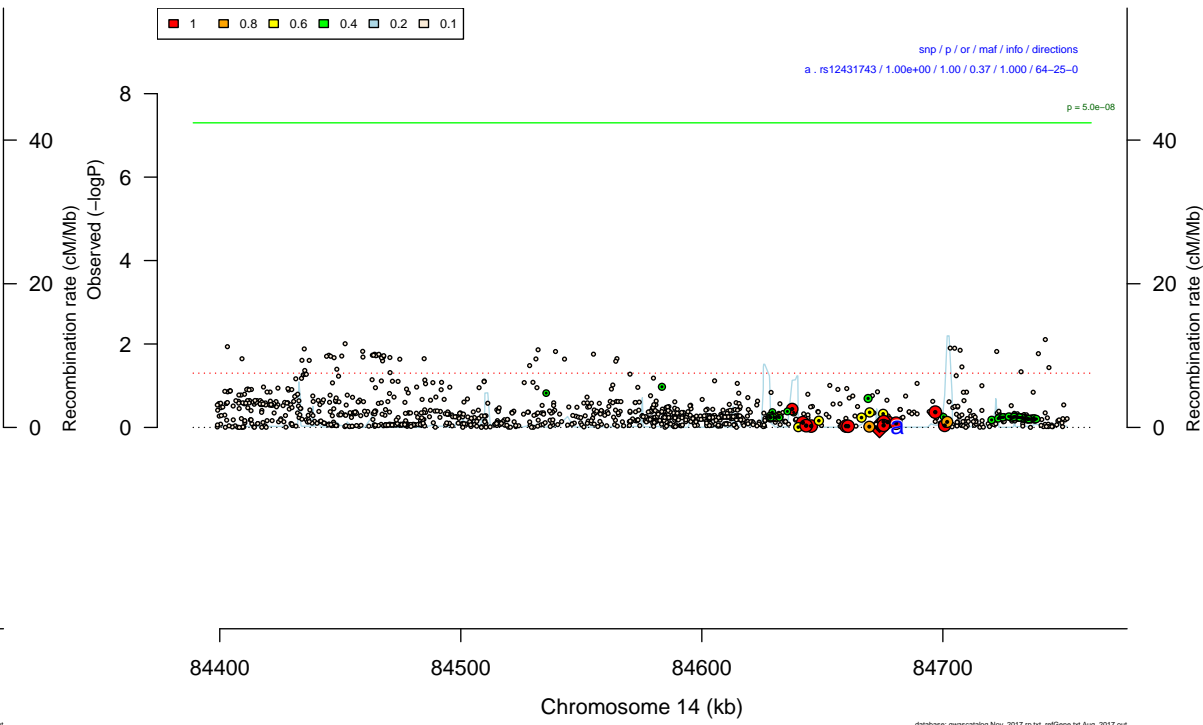

### SCZ\_uncond-rs704364-chr3

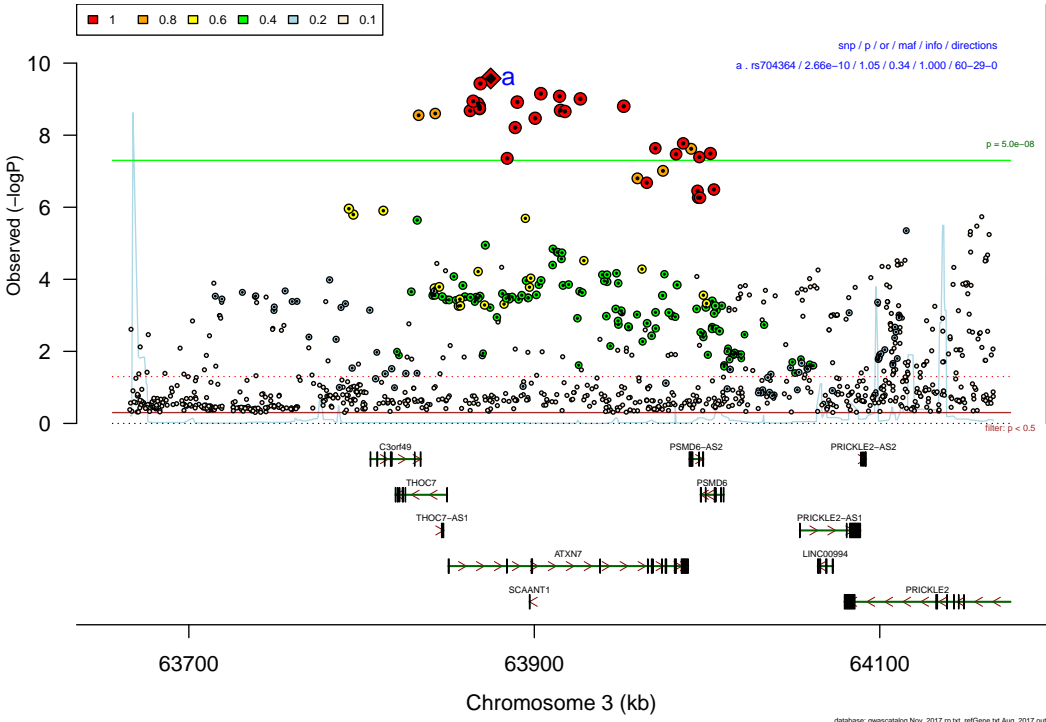

### SCZ\_cond\_rs704364-chr3

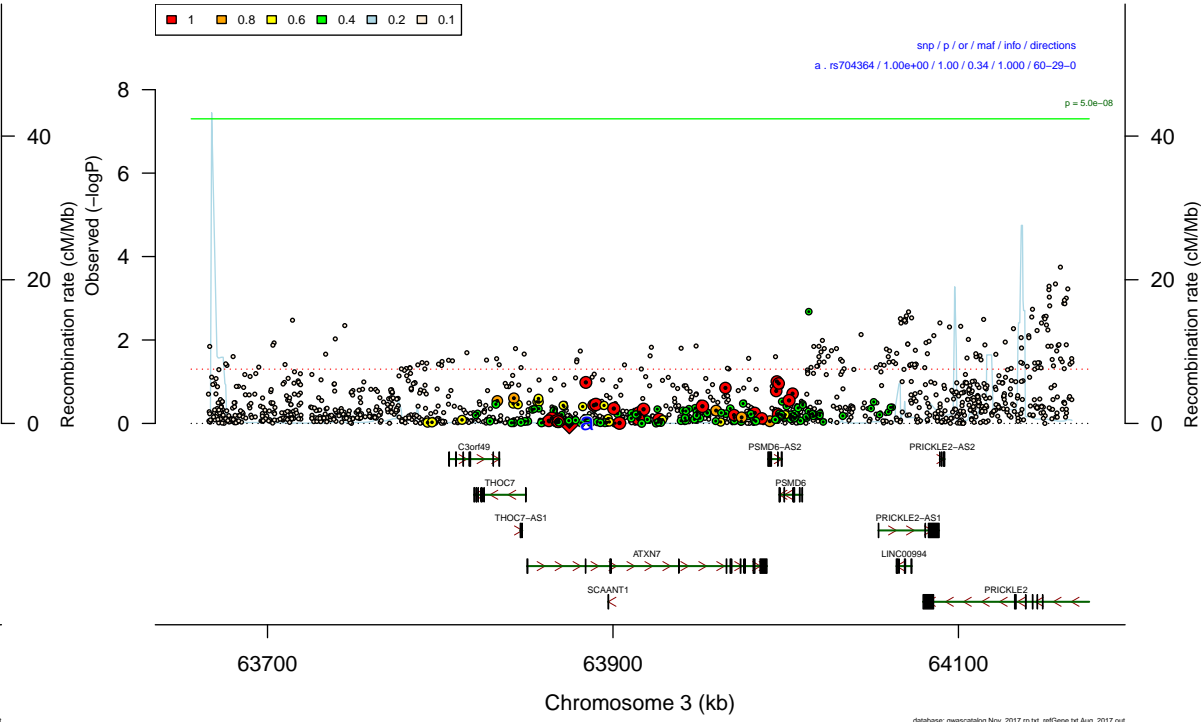

### SCZ\_uncond-rs4697446-chr4

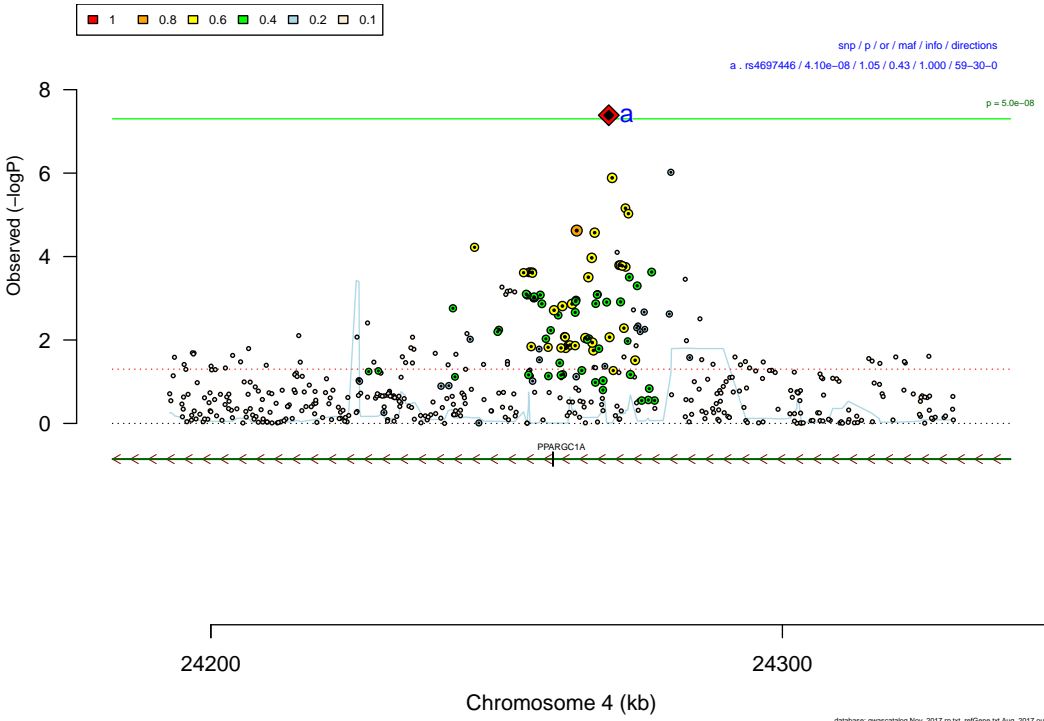

### SCZ\_cond\_rs4697446-chr4

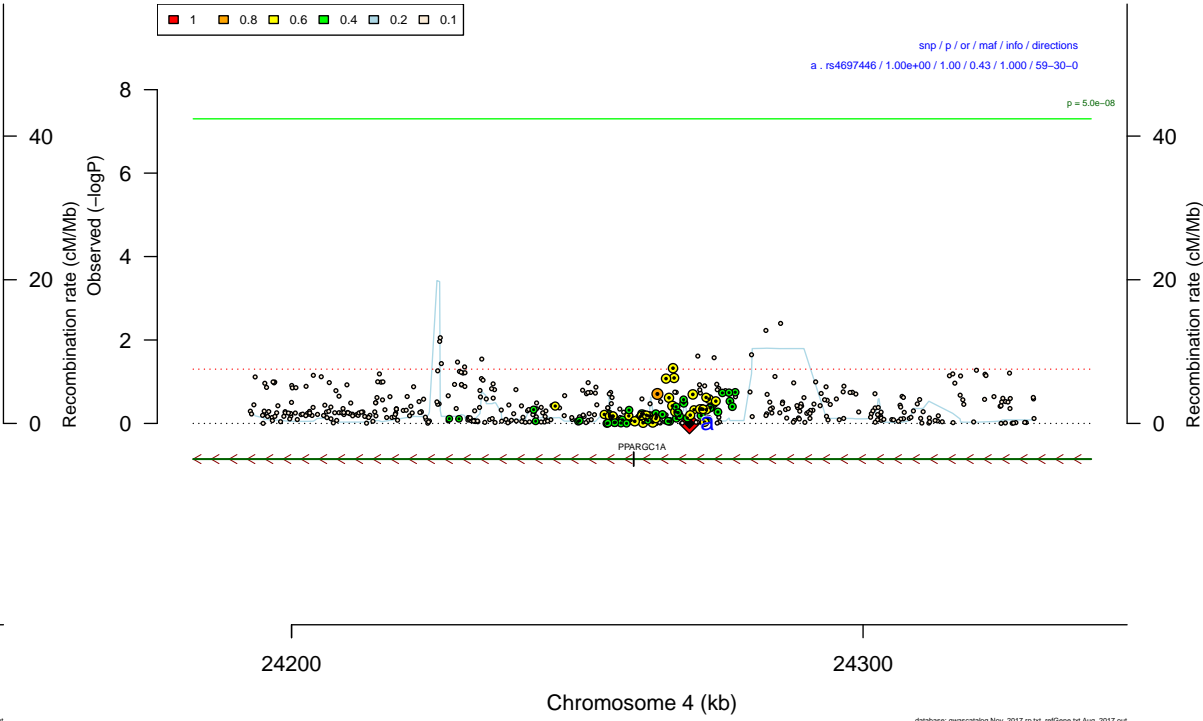

SCZ\_uncond-rs7002992-chr8

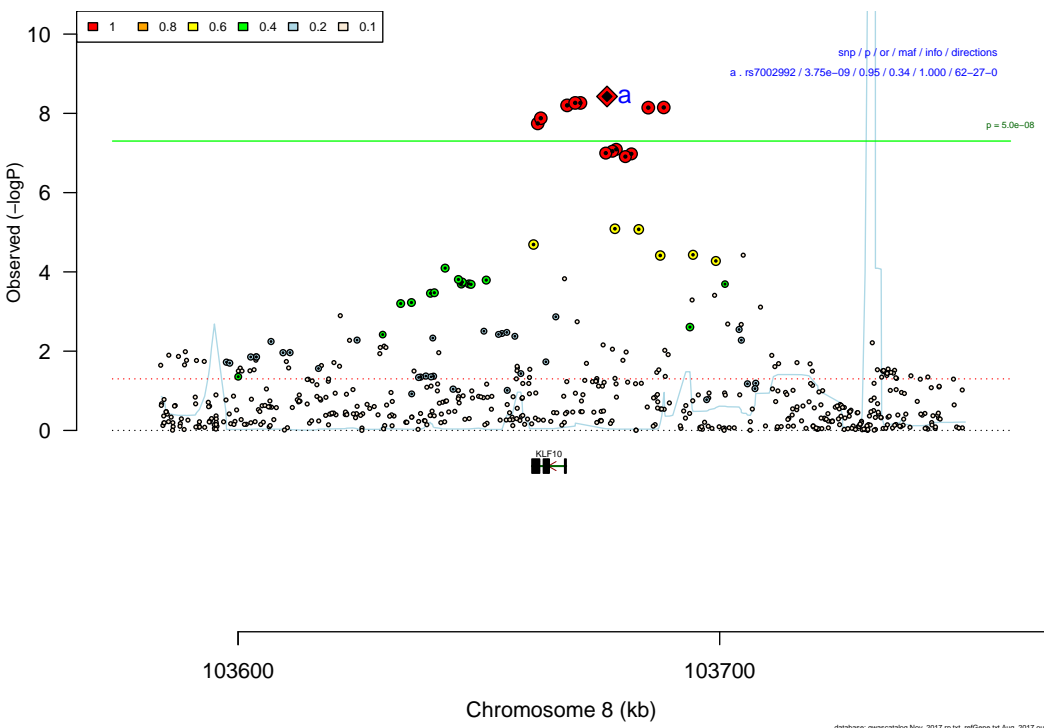

SCZ\_cond\_rs7002992-chr8

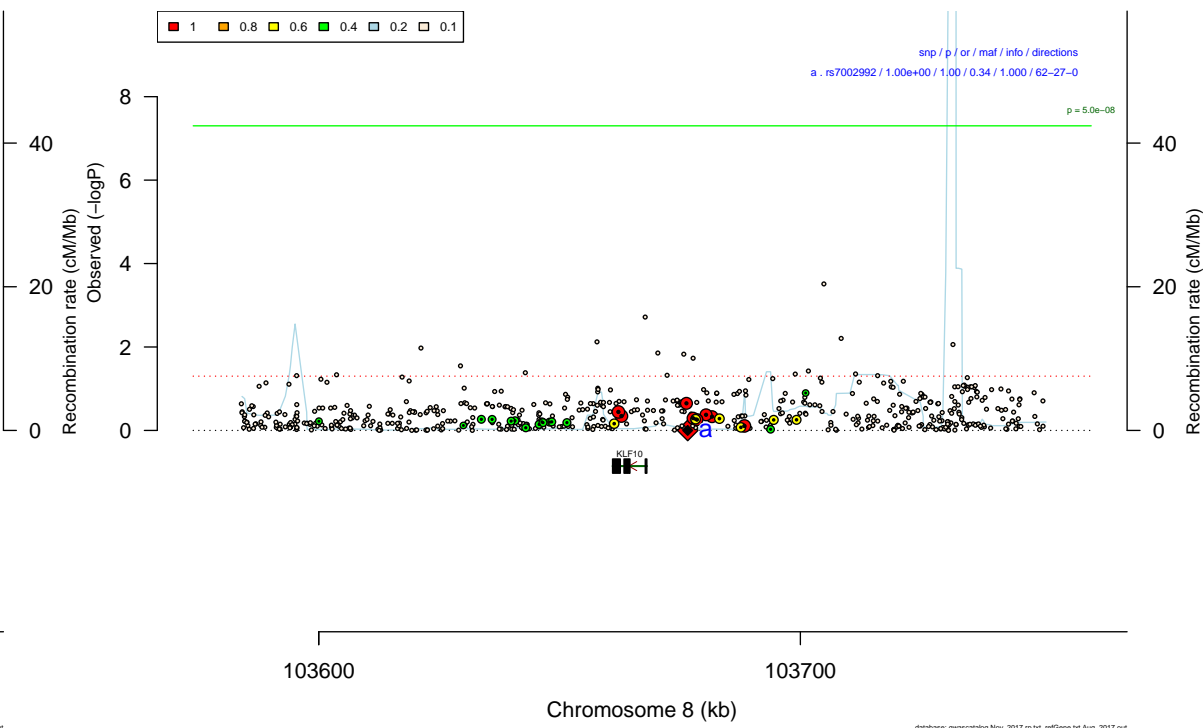

### SCZ\_uncond-rs4915203-chr1

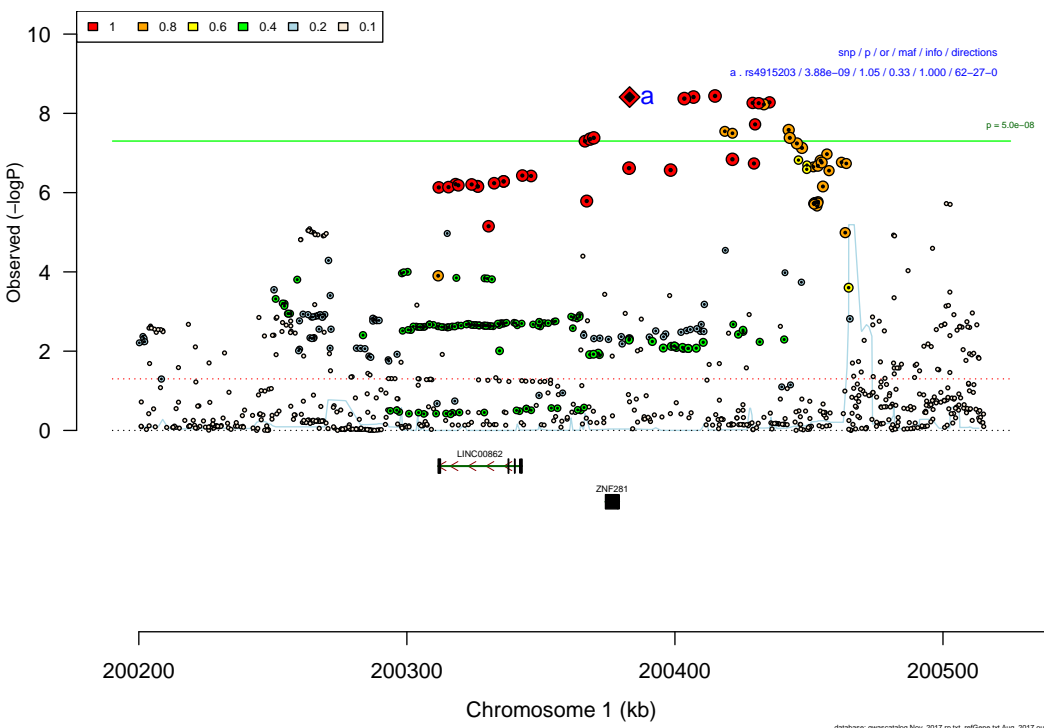

### SCZ\_cond\_rs4915203-chr1

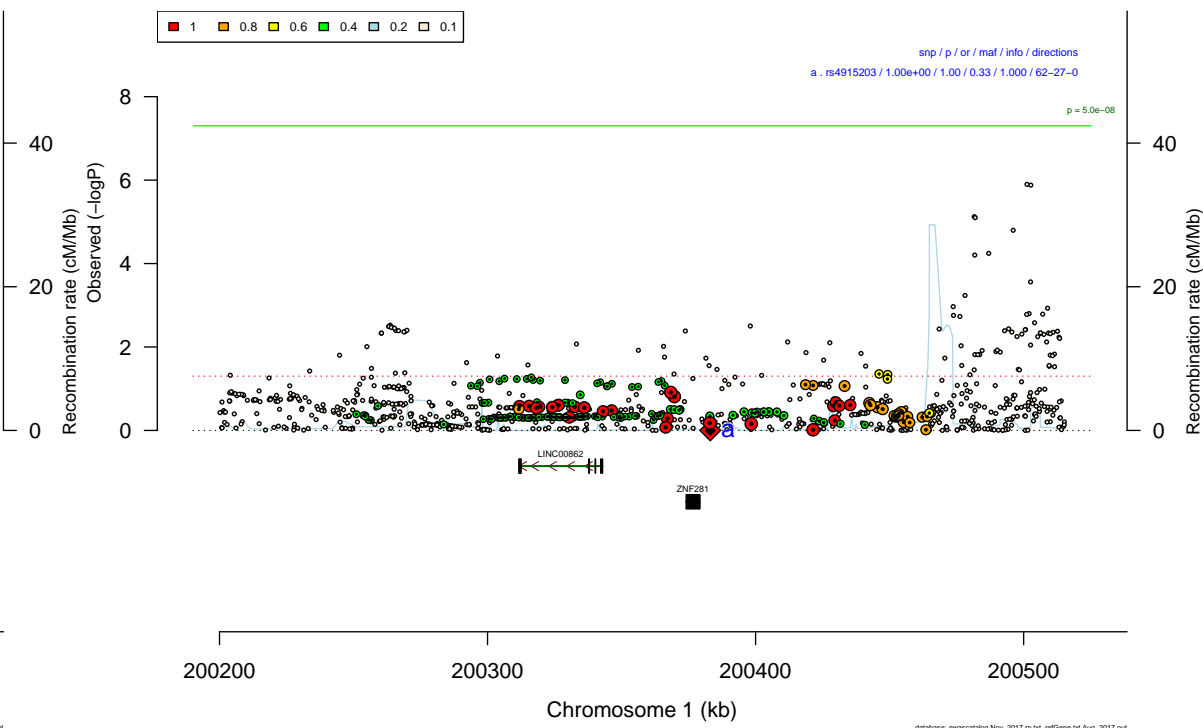

### SCZ\_uncond-rs3810450-chr19

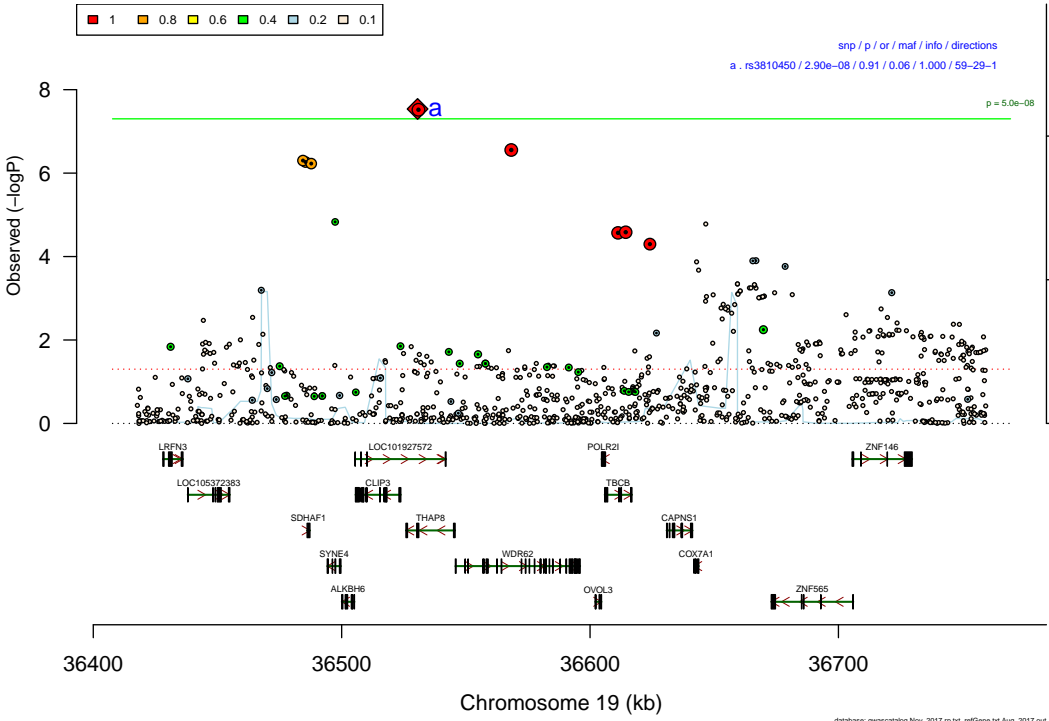

### SCZ\_cond\_rs3810450-chr19

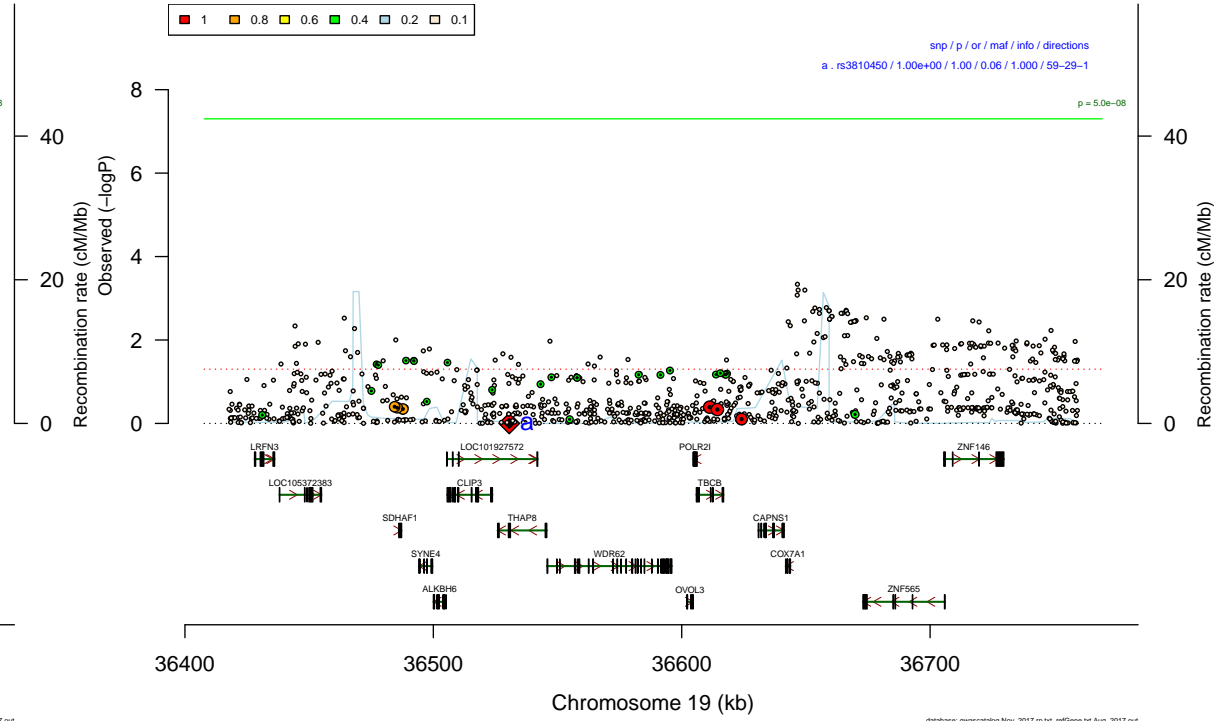

### SCZ\_uncond-rs11136325-chr8

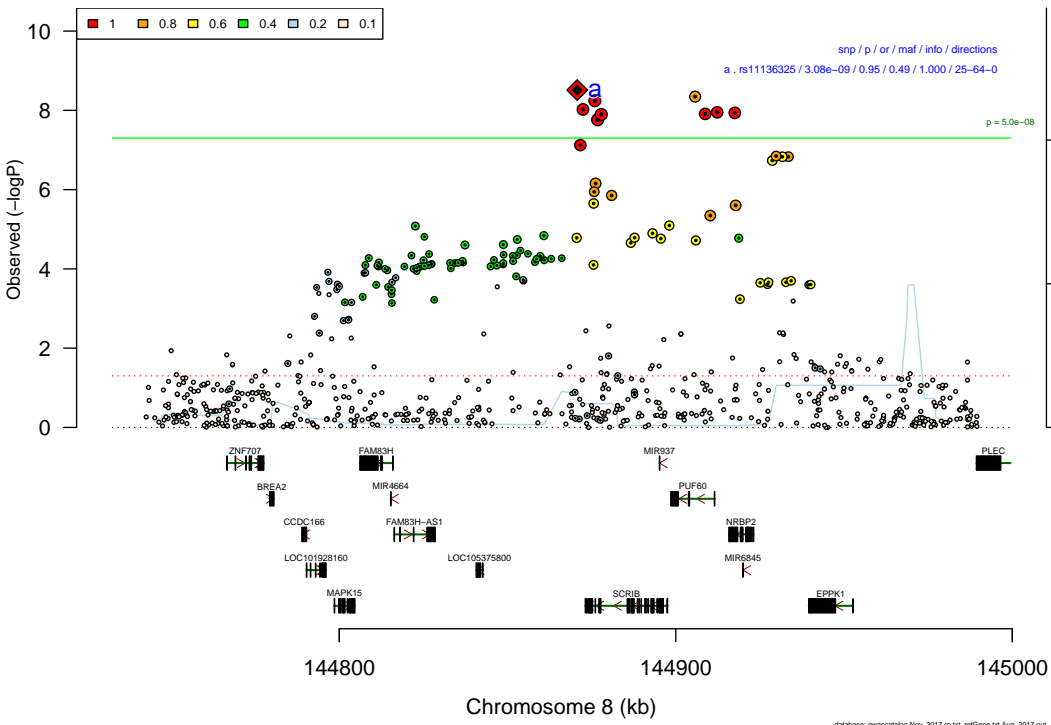

### SCZ\_cond\_rs11136325-chr8

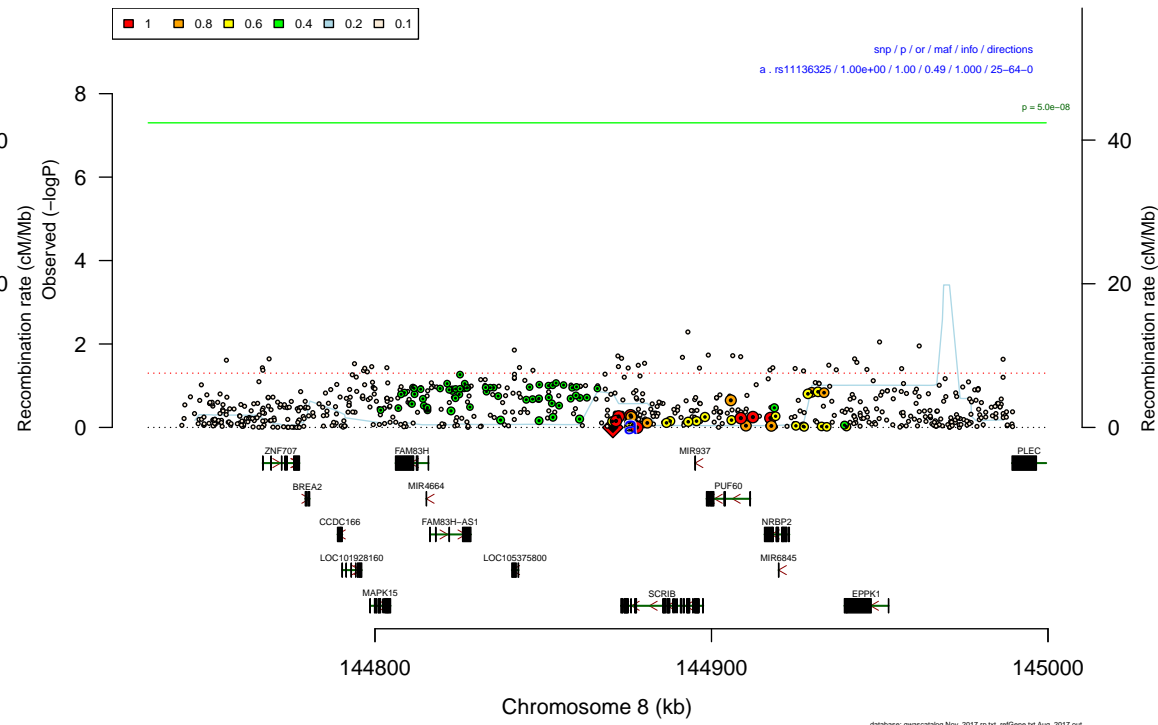

### SCZ\_uncond-rs999494-chr2

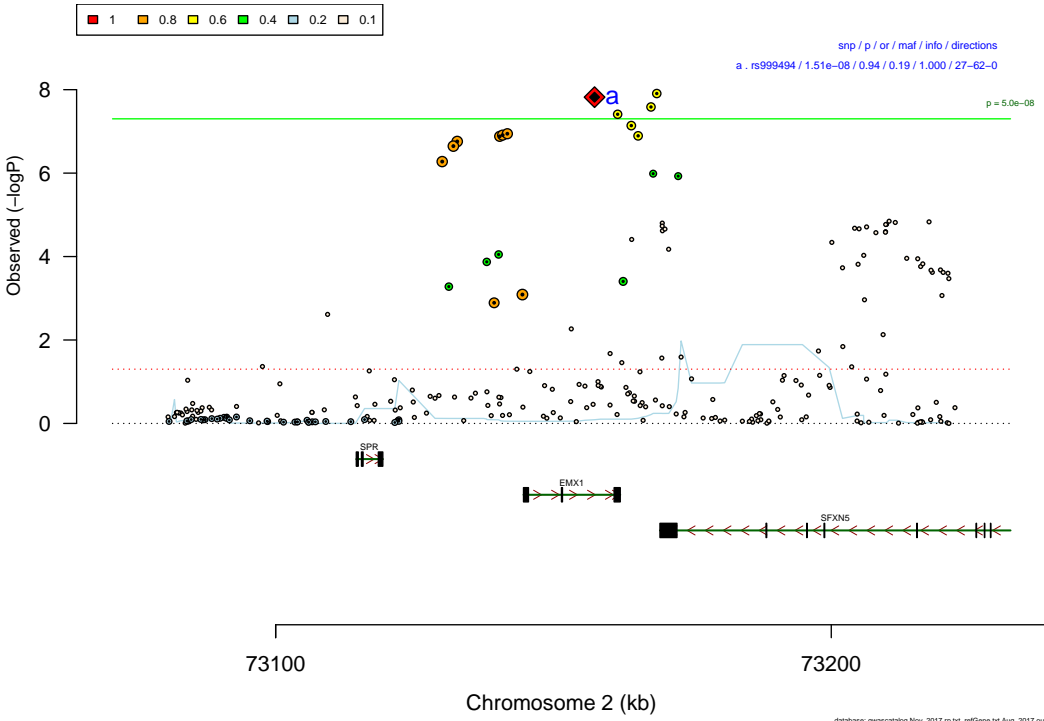

### SCZ\_cond\_rs999494-chr2

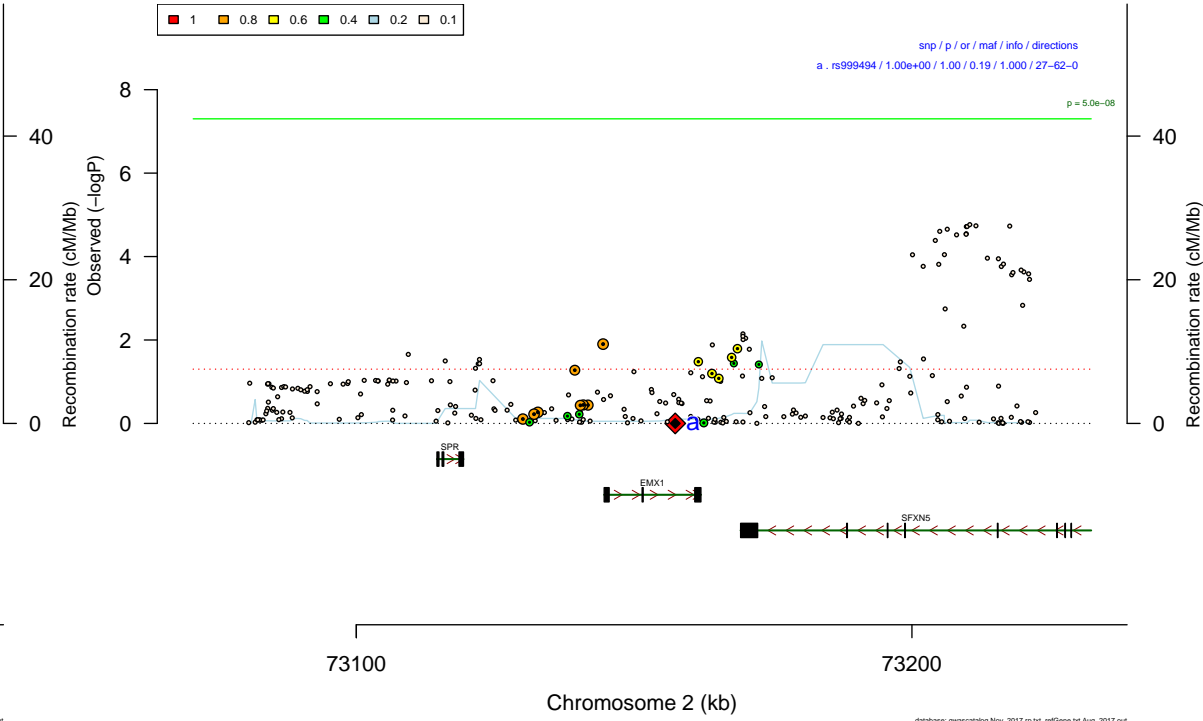



### SCZ\_uncond-rs2381411-chr9

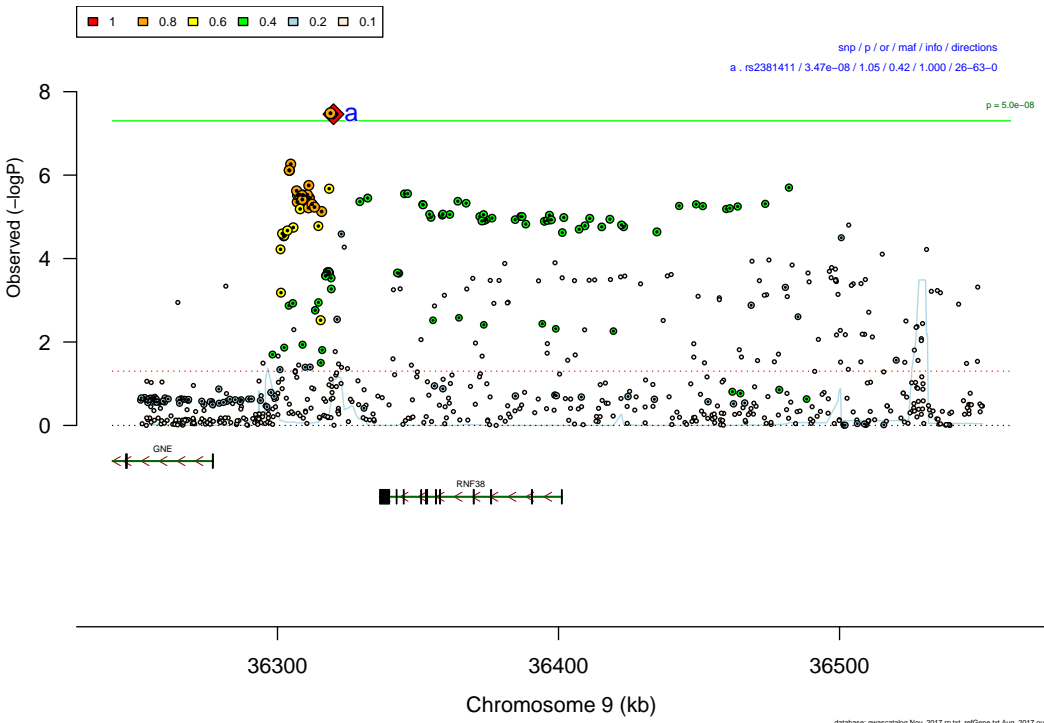

### SCZ\_cond\_rs2381411-chr9

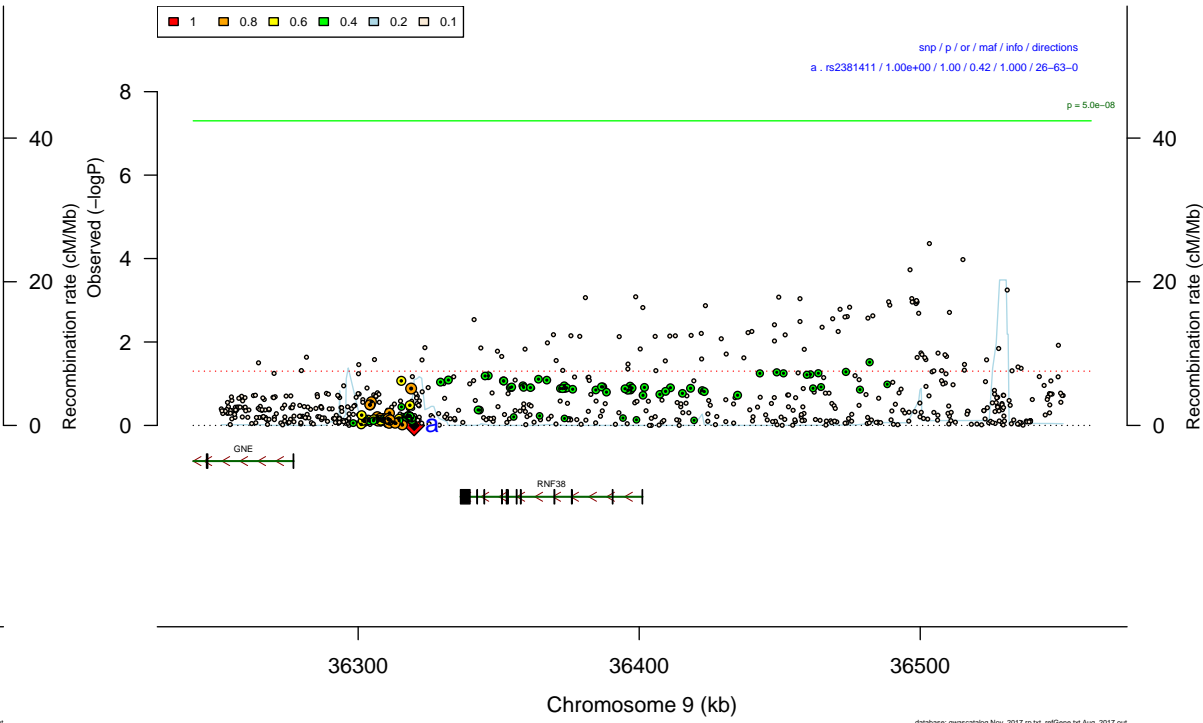

### SCZ\_uncond-rs498591-chr9

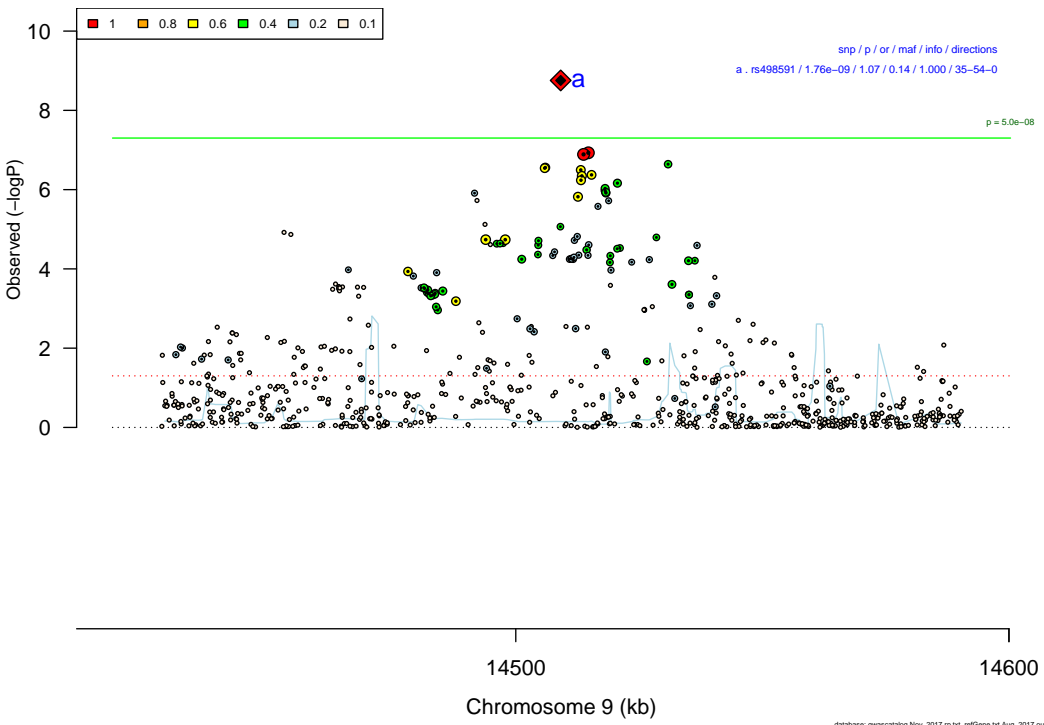

### SCZ\_cond\_rs498591-chr9

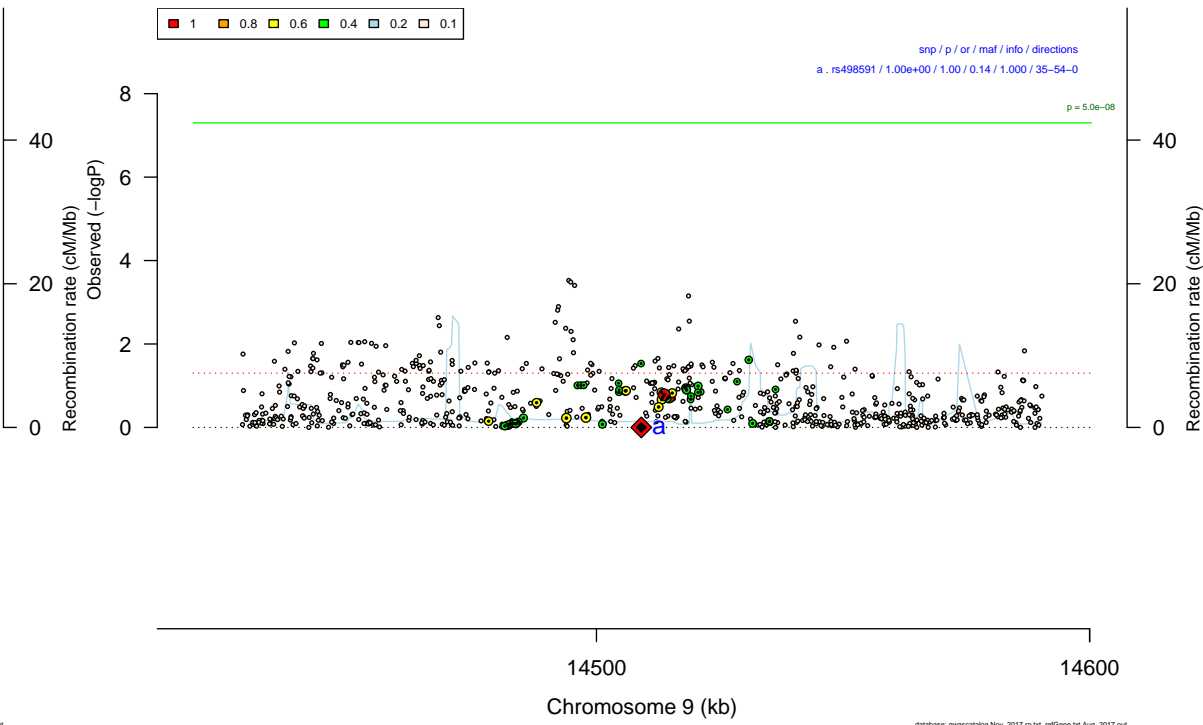

### SCZ\_uncond-rs322128-chr19

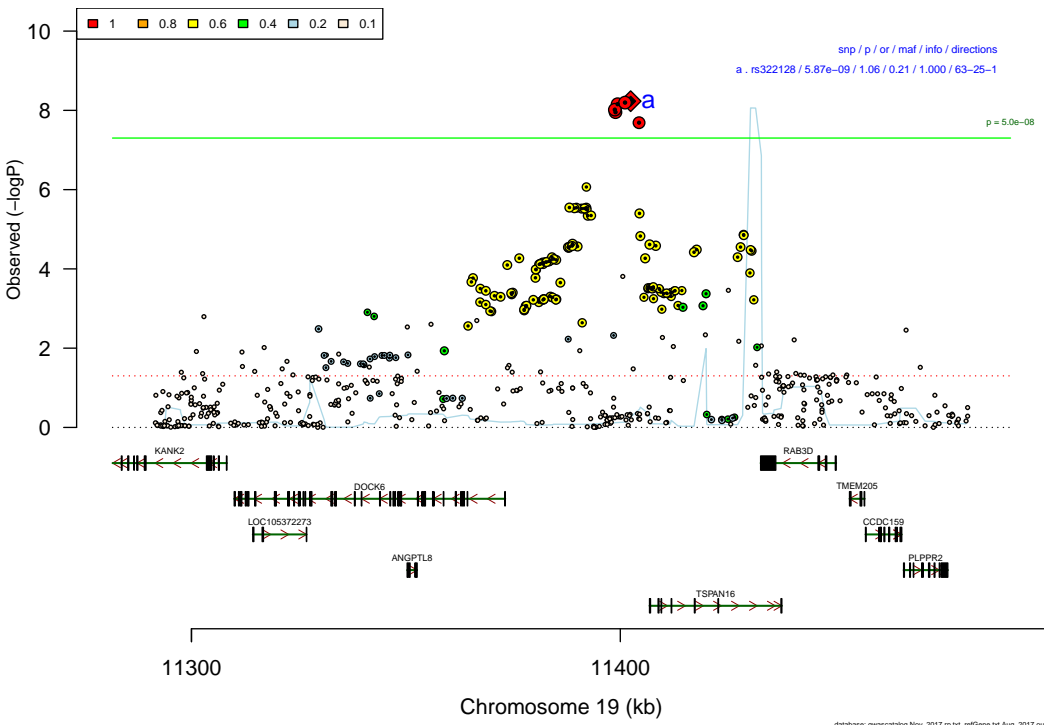

### SCZ\_cond\_rs322128-chr19

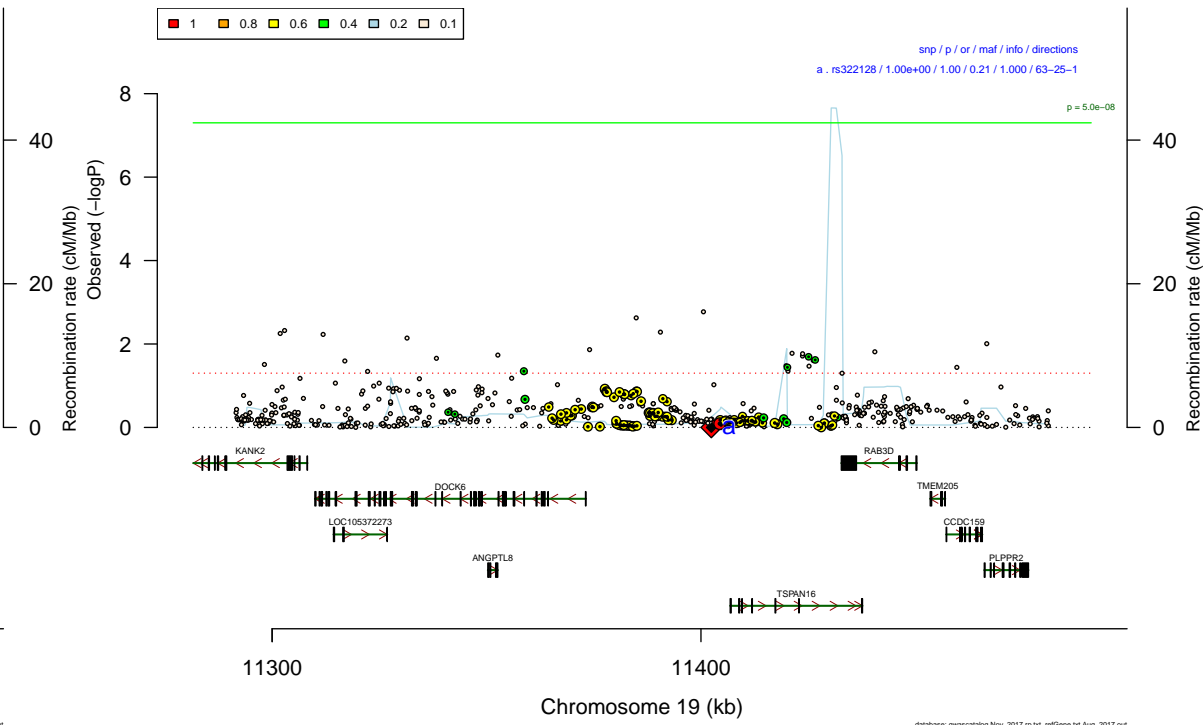

### SCZ\_uncond-rs758749-chr19

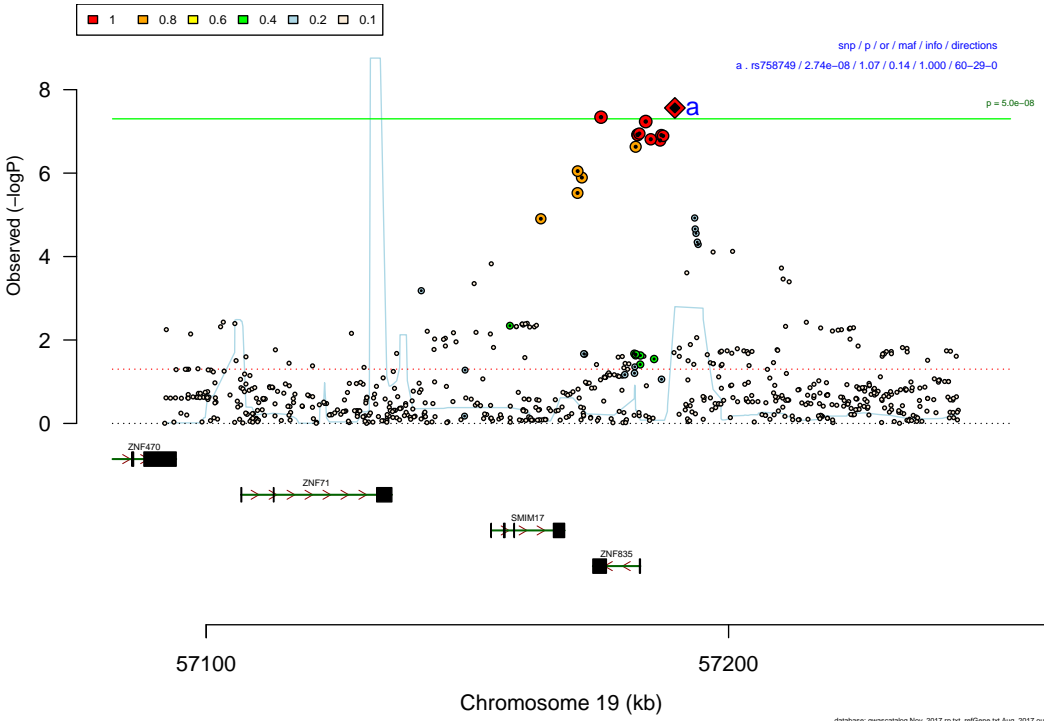

### SCZ\_cond\_rs758749-chr19

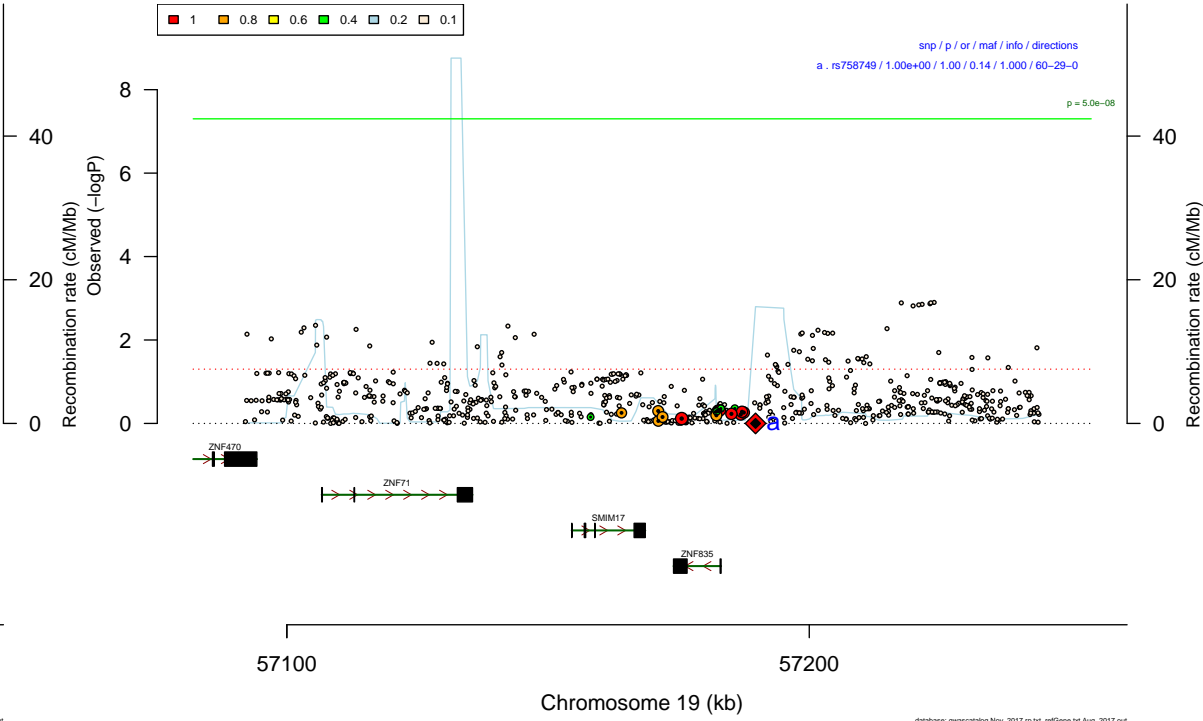

### SCZ\_uncond-rs9287971-chr2

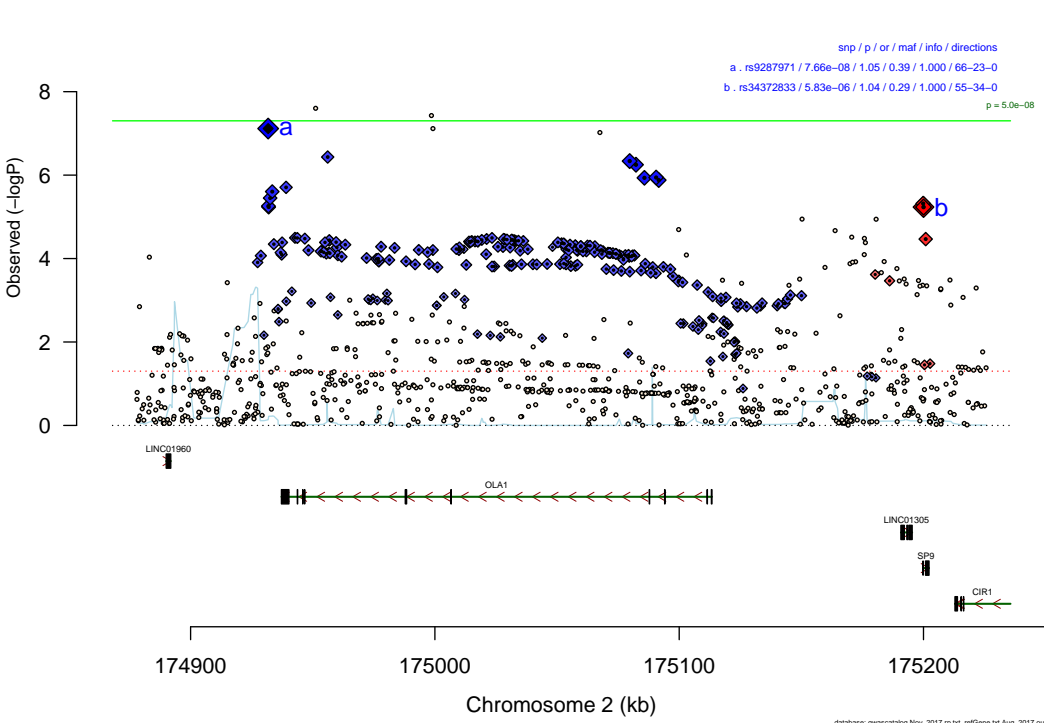

### SCZ\_cond\_rs9287971-chr2

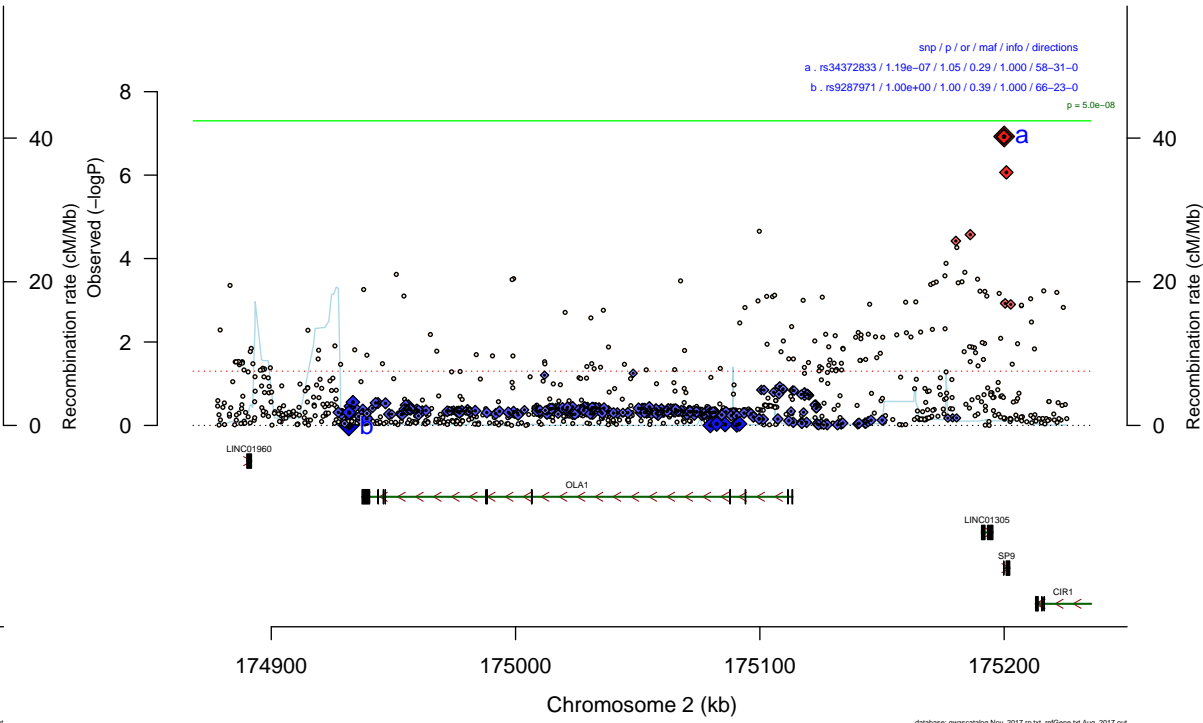

### SCZ\_cond\_rs9287971-rs34372833-chr2

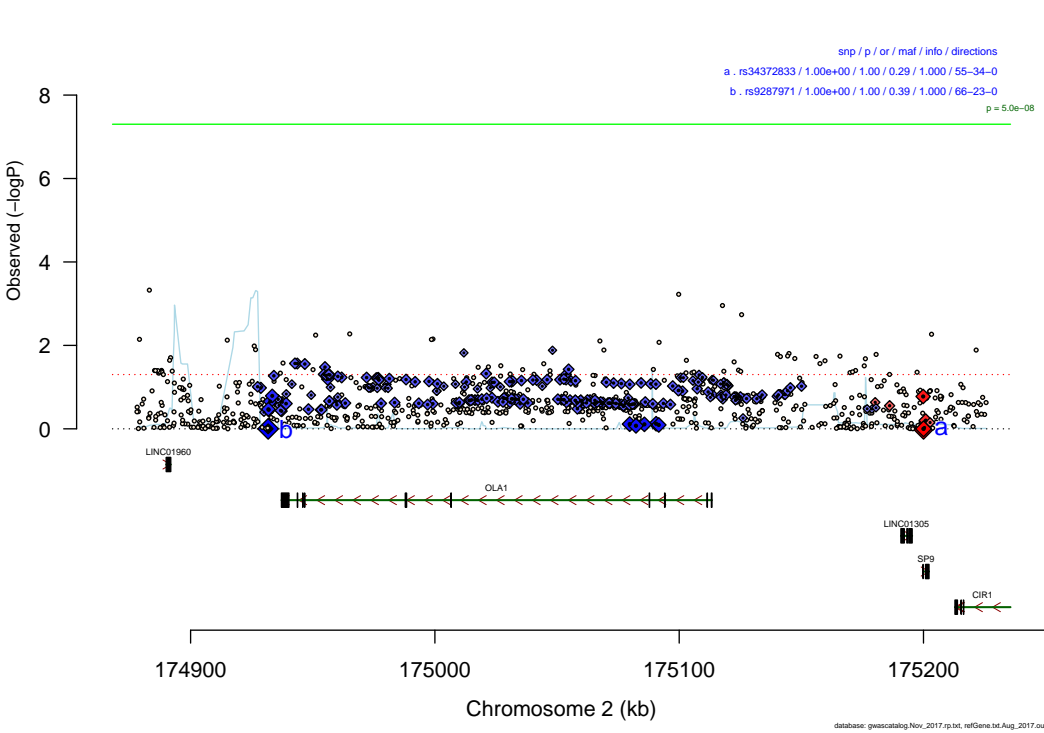

### SCZ\_uncond-rs4672366-chr2

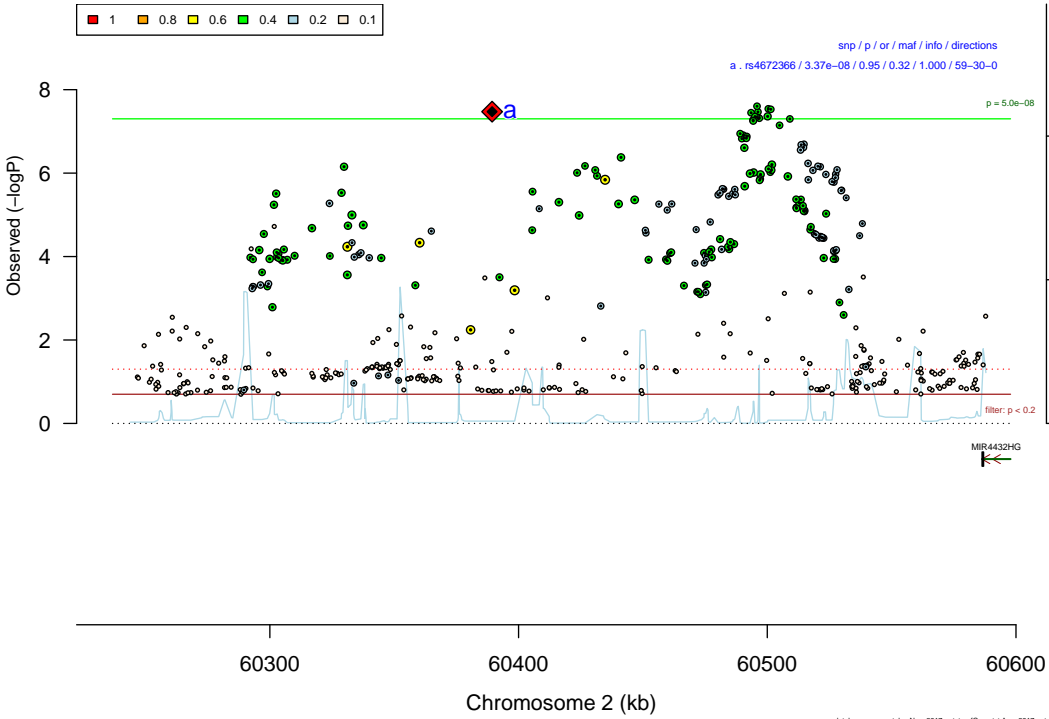

### SCZ\_cond\_rs4672366-chr2

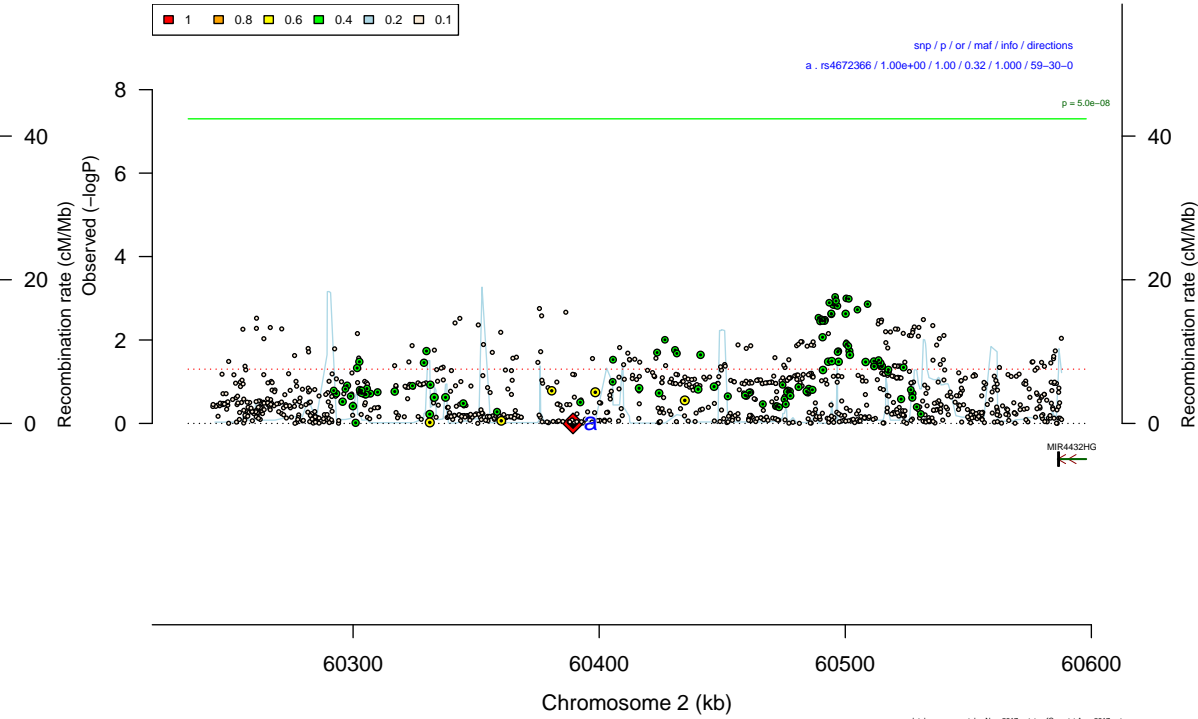

### SCZ\_uncond-rs12126806-chr1

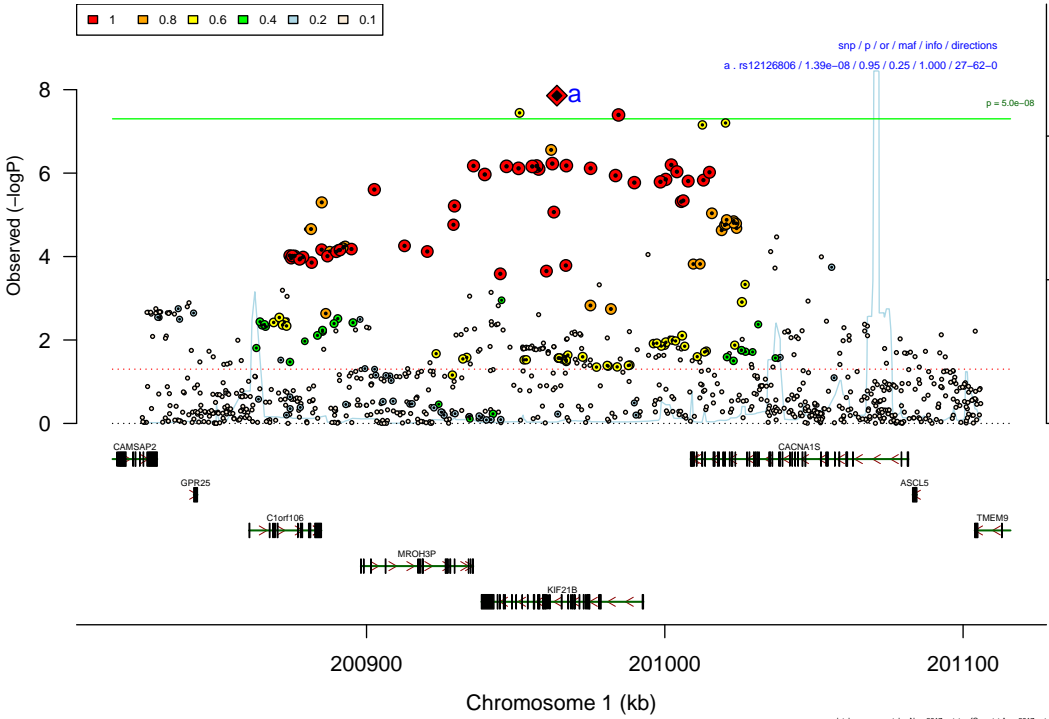

### SCZ\_cond\_rs12126806-chr1

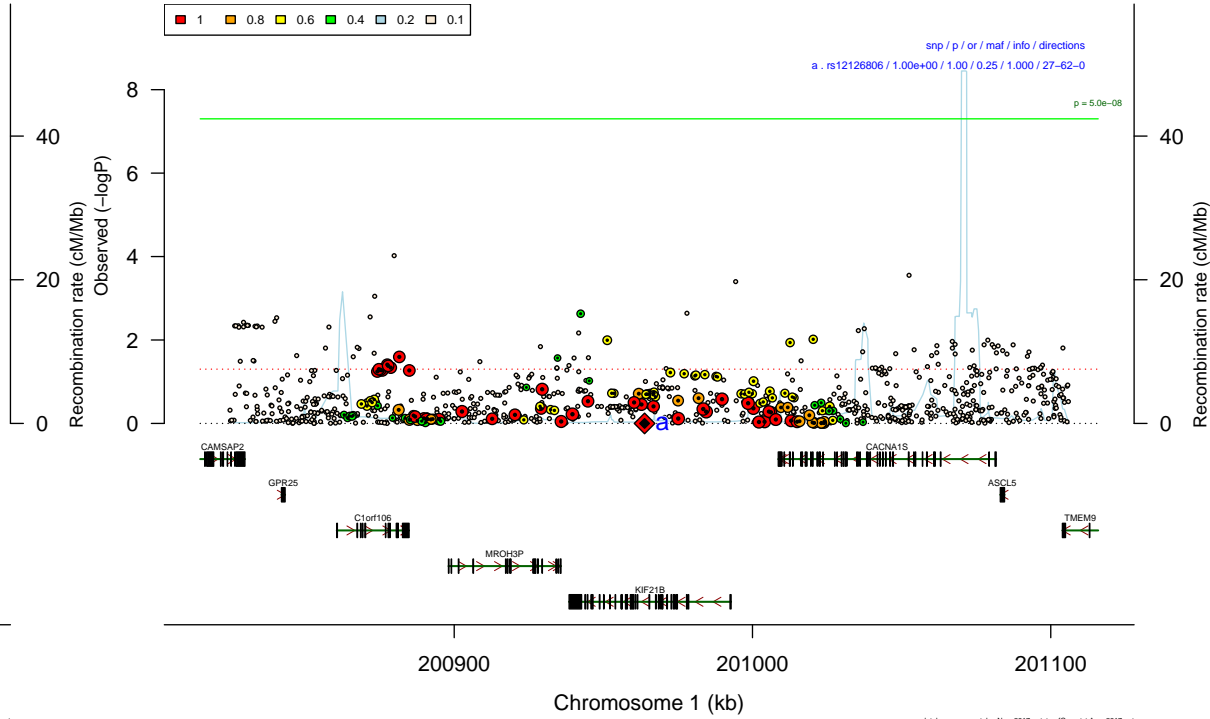

### SCZ\_uncond-rs2455415-chr13

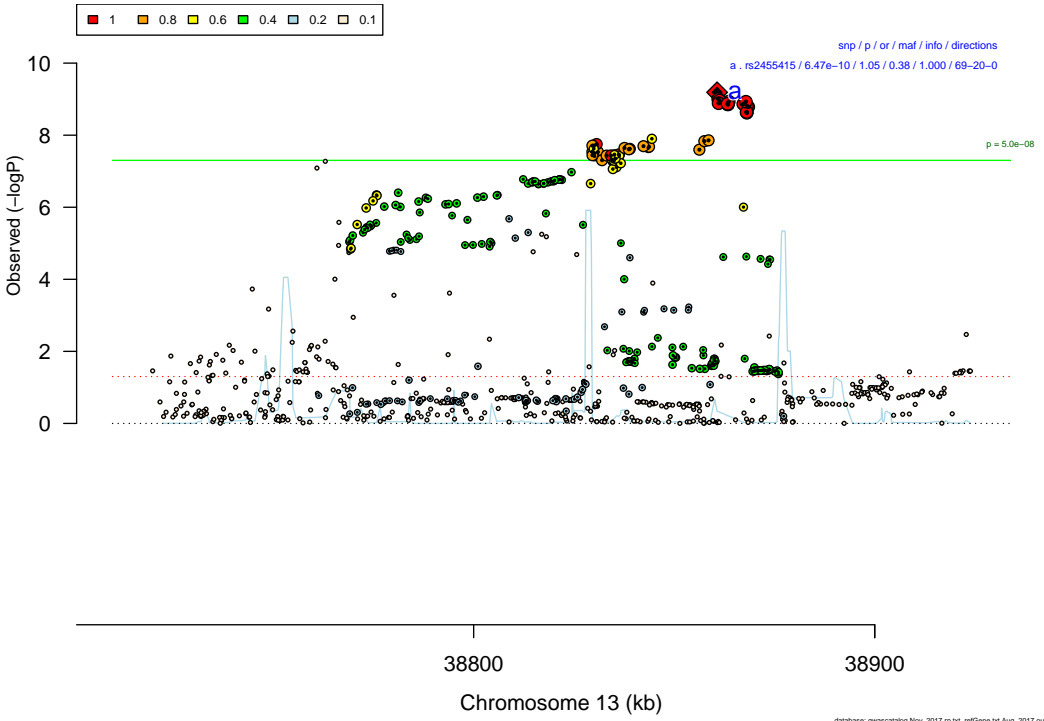

### SCZ\_cond\_rs2455415-chr13

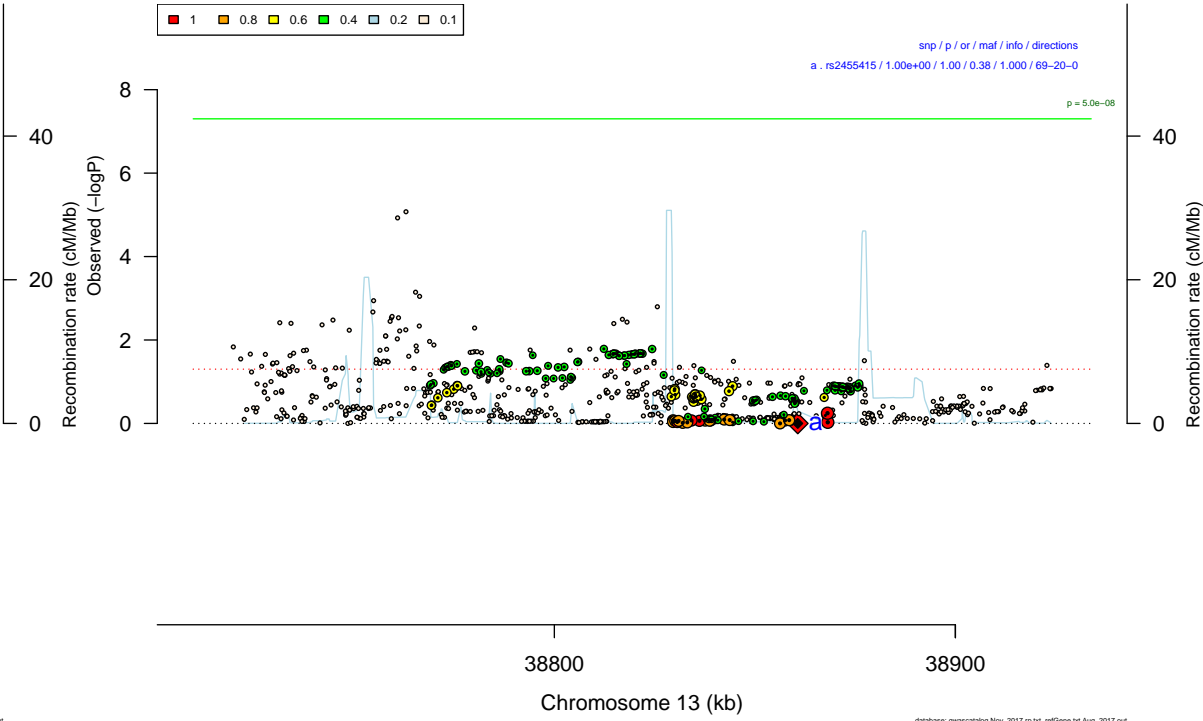



### SCZ\_uncond-rs12301769-chr12

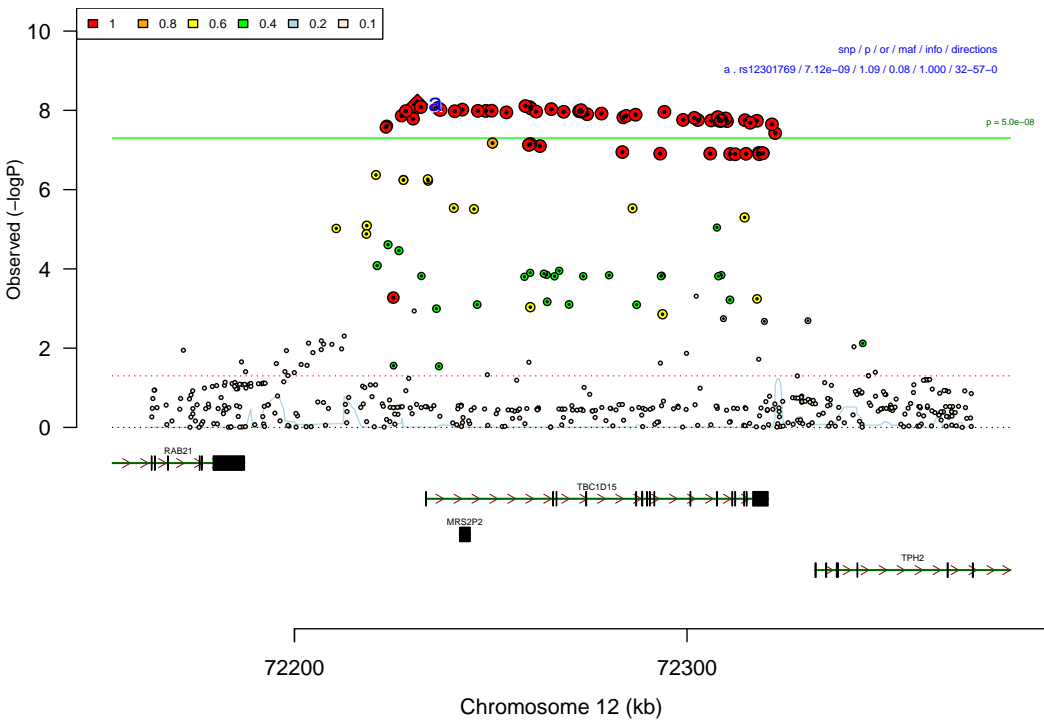

### SCZ\_cond\_rs12301769-chr12

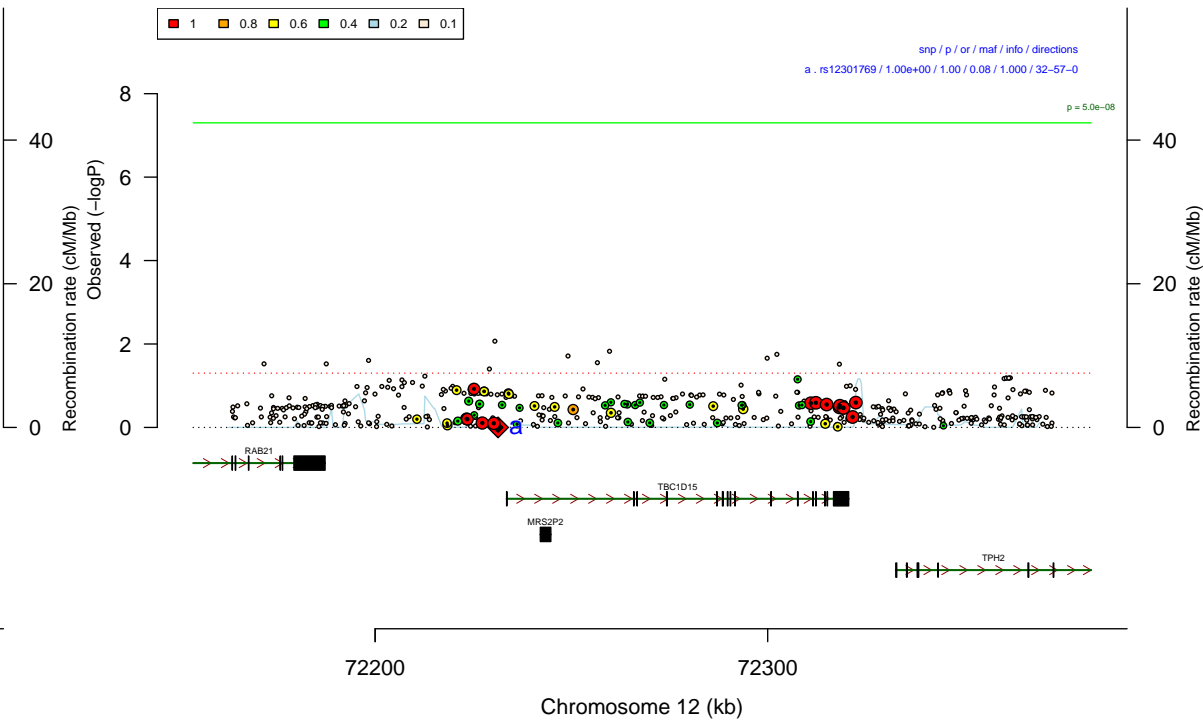

### SCZ\_uncond-rs459391-chr21

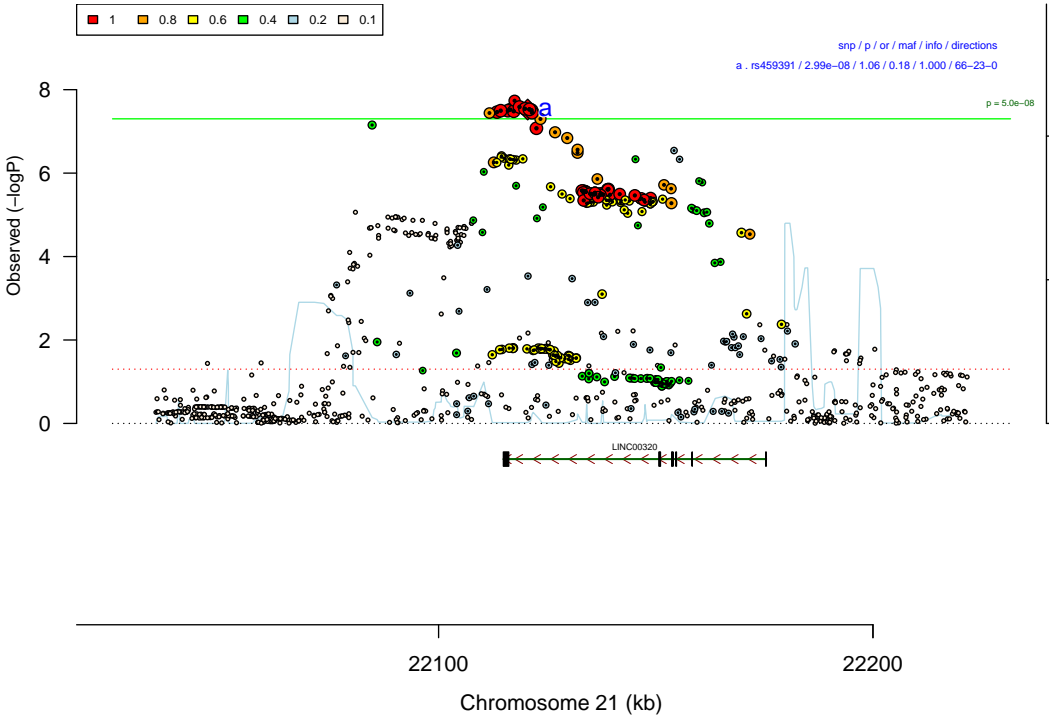

### SCZ\_cond\_rs459391-chr21

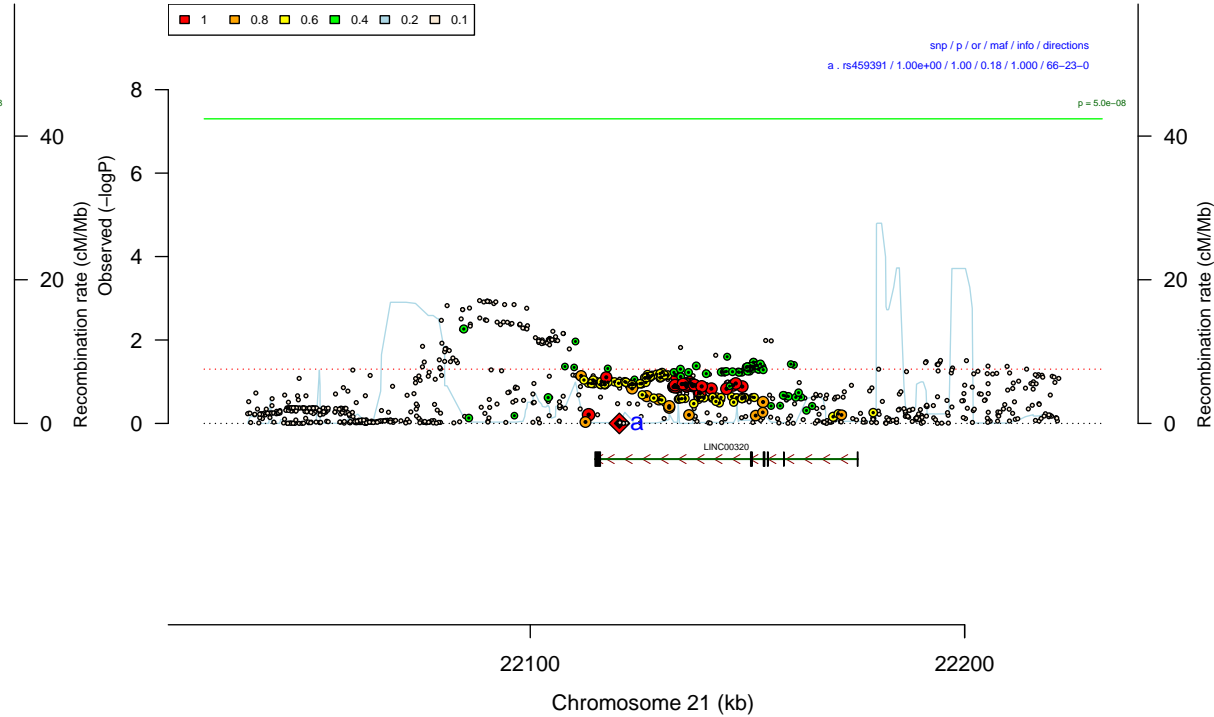

### SCZ\_uncond-rs12188094-chr5

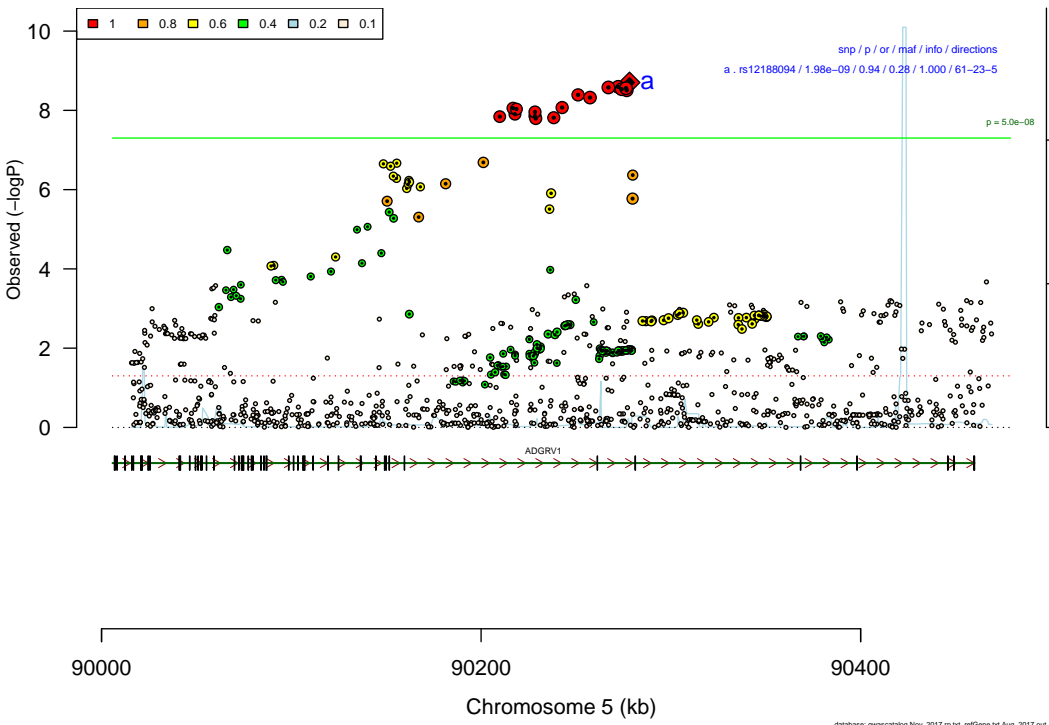

### SCZ\_cond\_rs12188094-chr5

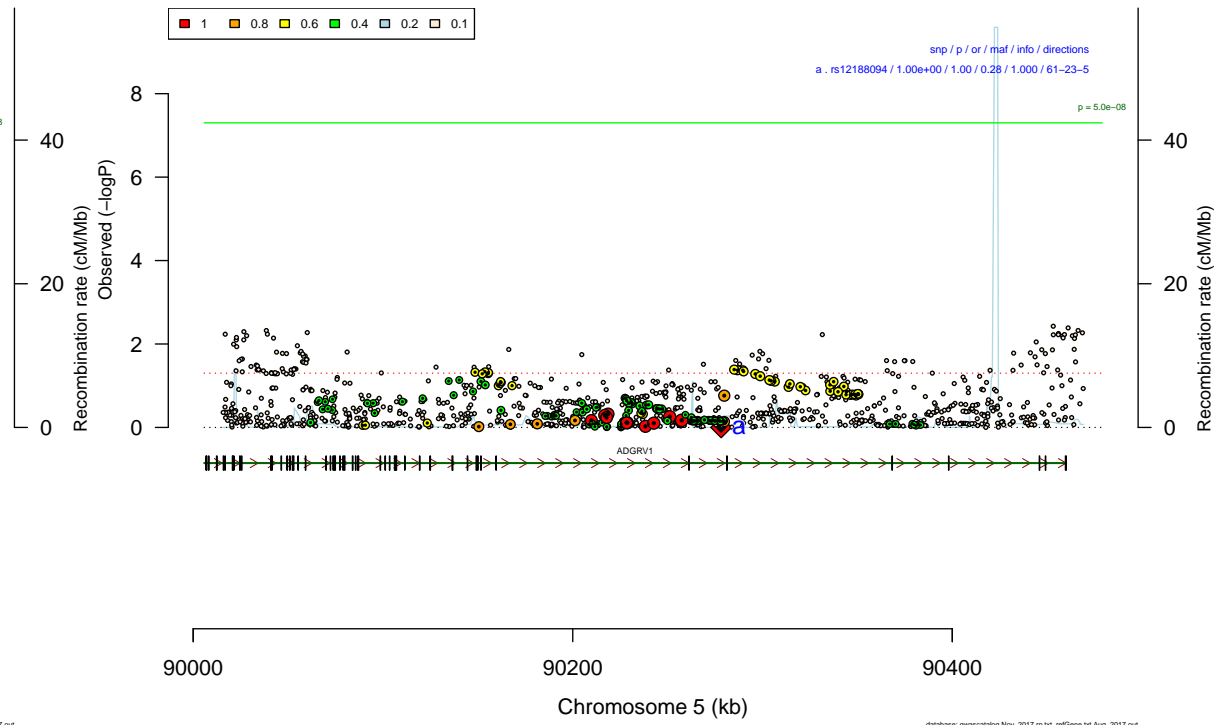

### SCZ\_uncond-rs11972718-chr7

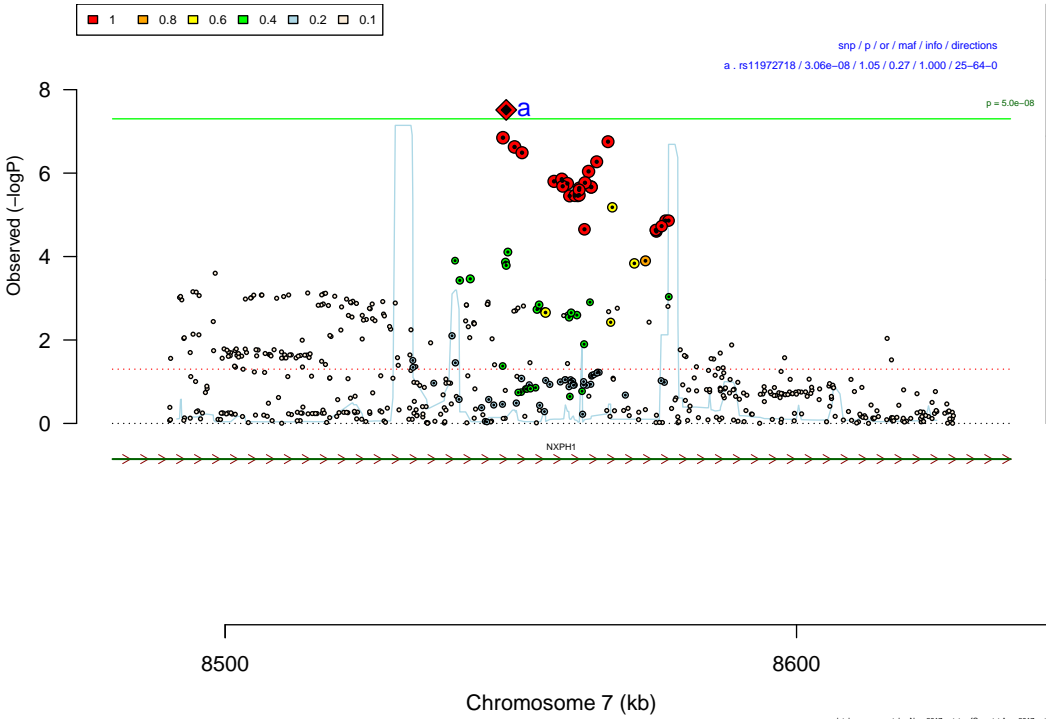

### SCZ\_cond\_rs11972718-chr7

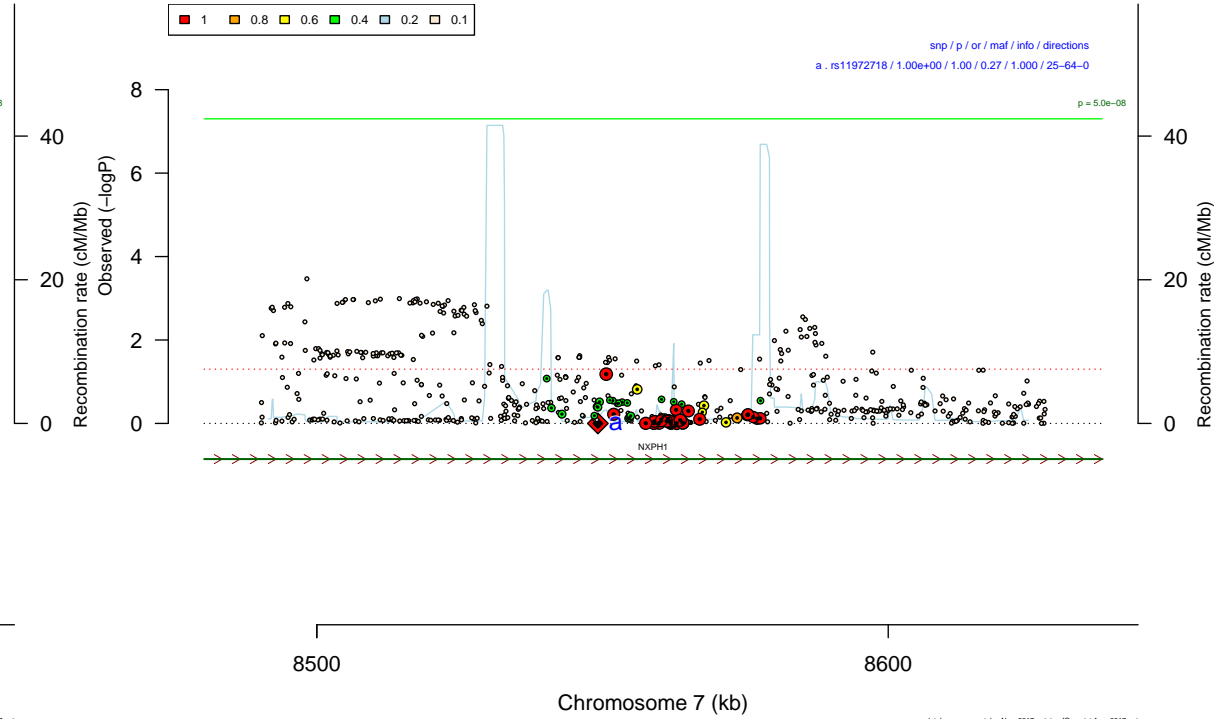

### SCZ\_uncond-rs12652777-chr5

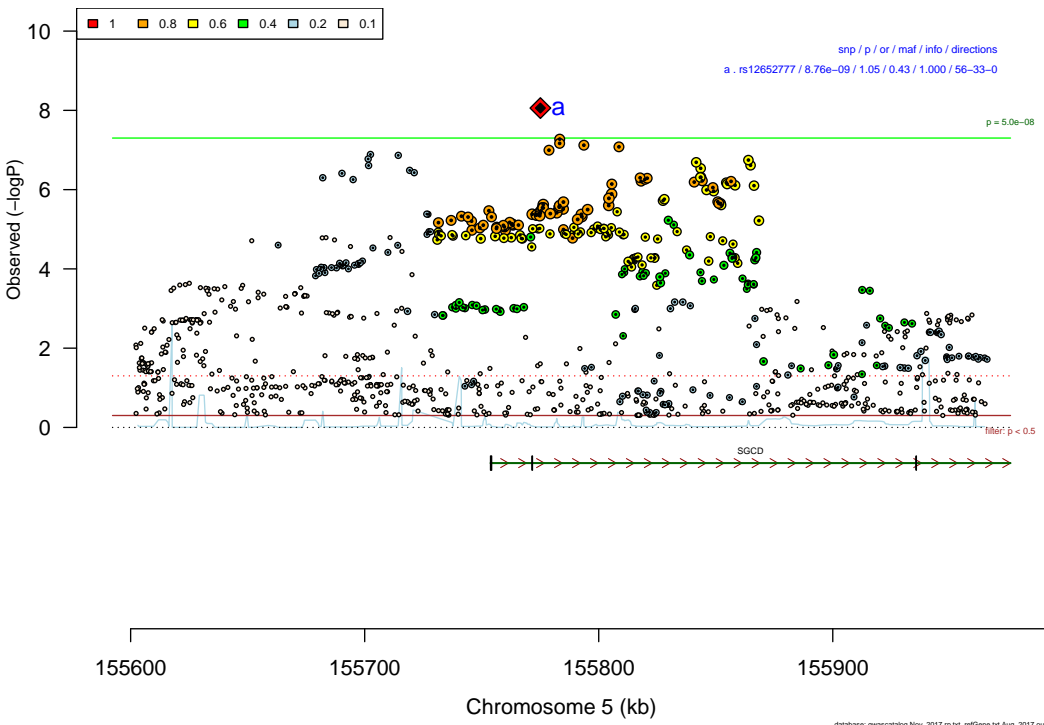

### SCZ\_cond\_rs12652777-chr5

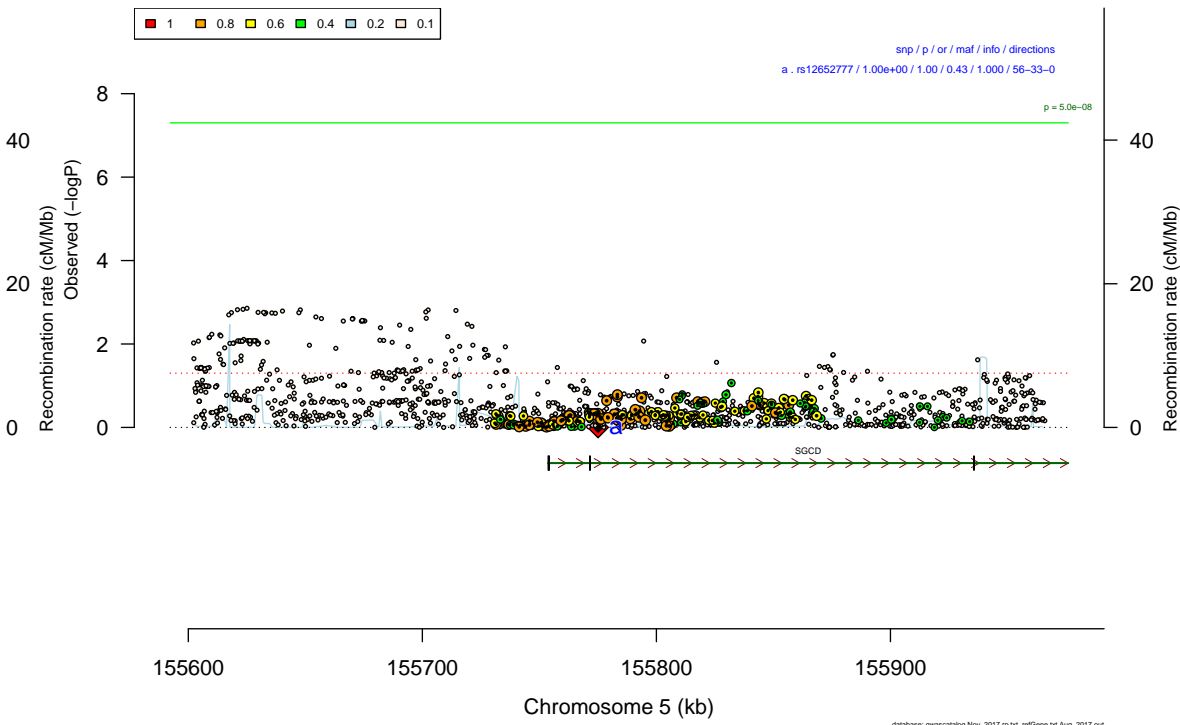

### SCZ\_uncond-rs2909457-chr2

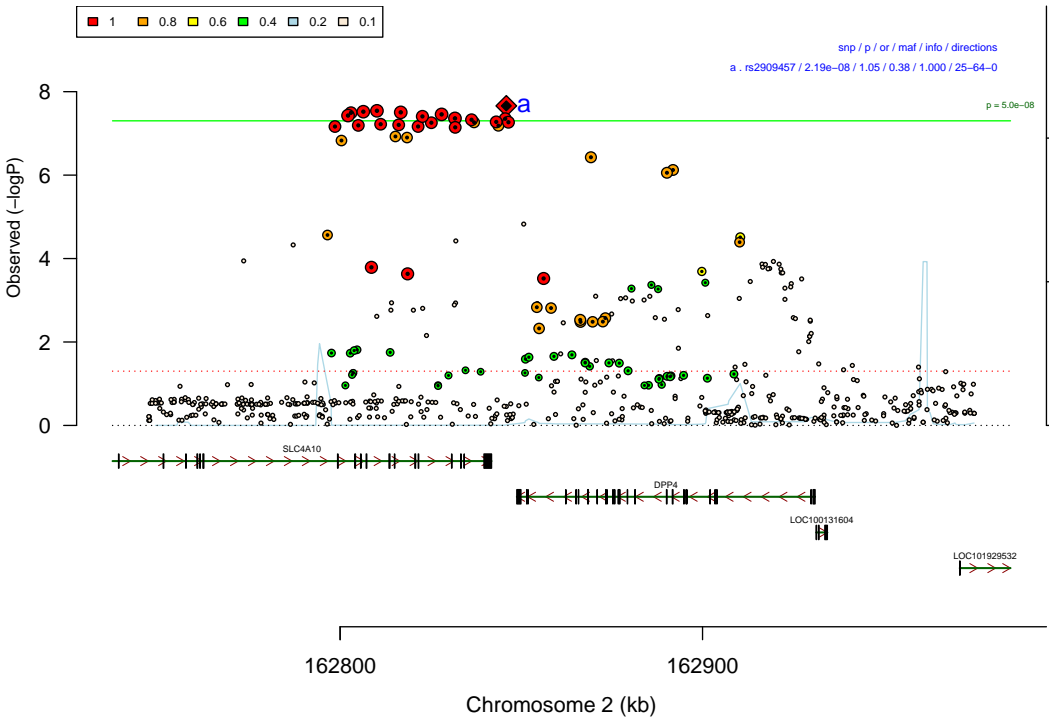

### SCZ\_cond\_rs2909457-chr2

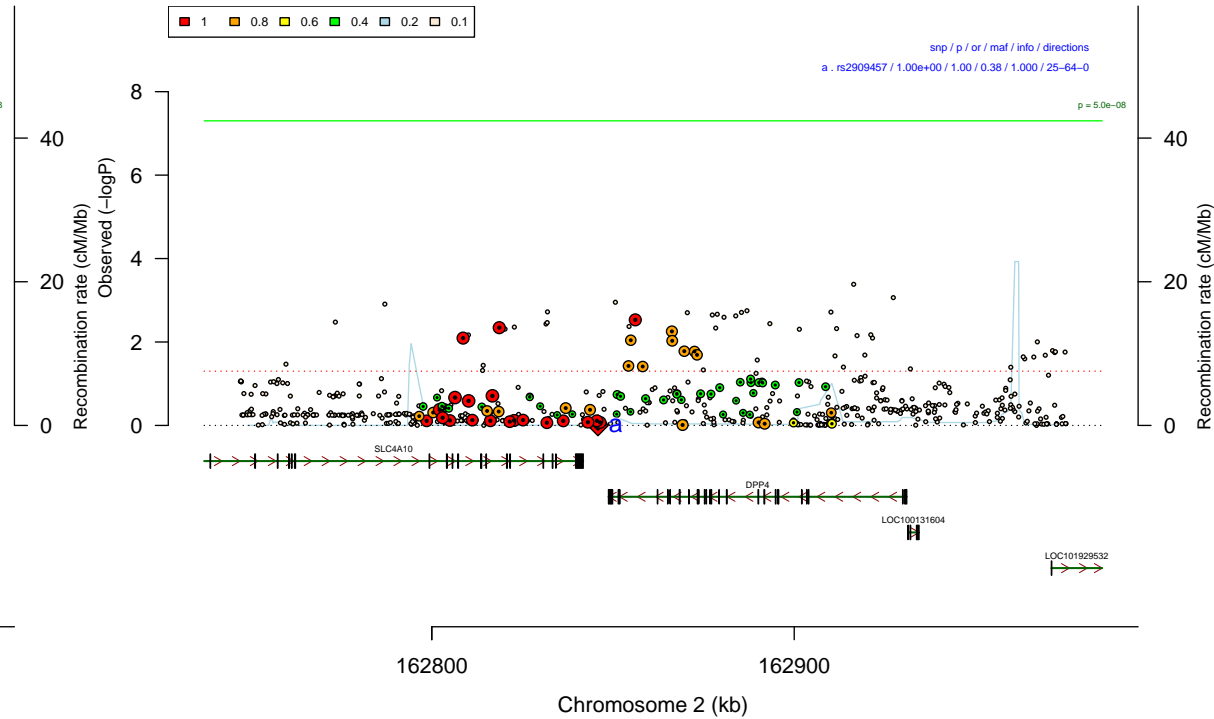

### SCZ\_uncond-rs7575796-chr2

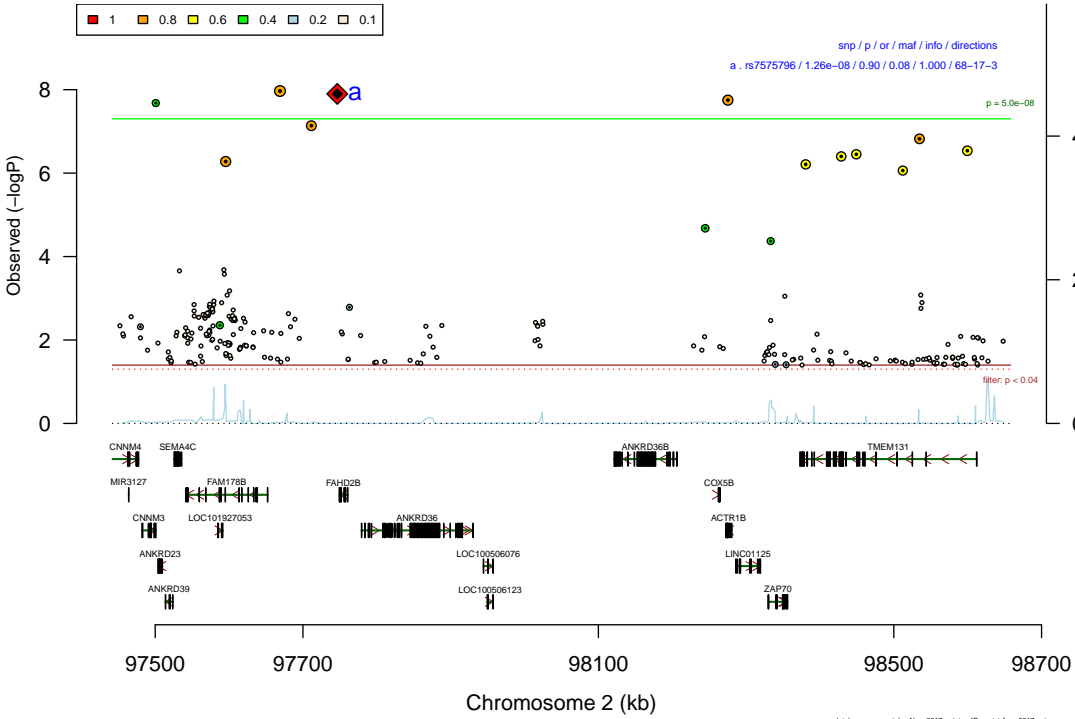

### SCZ\_cond\_rs7575796-chr2

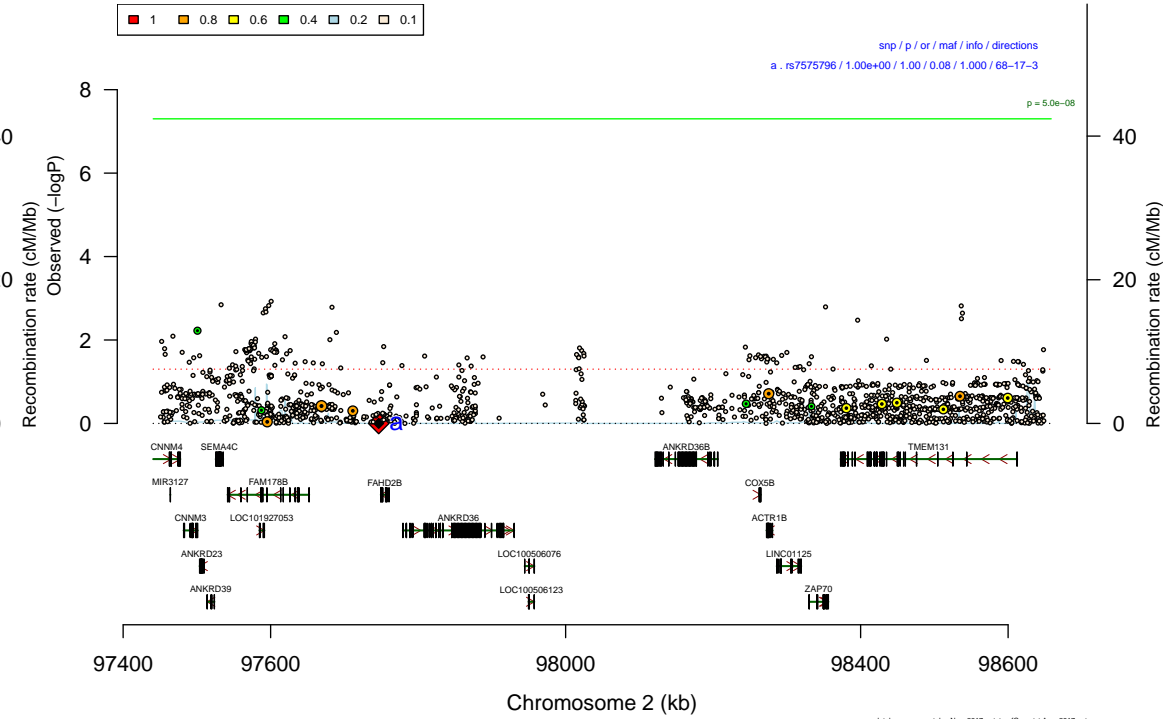

### SCZ\_uncond-rs10127983-chr1

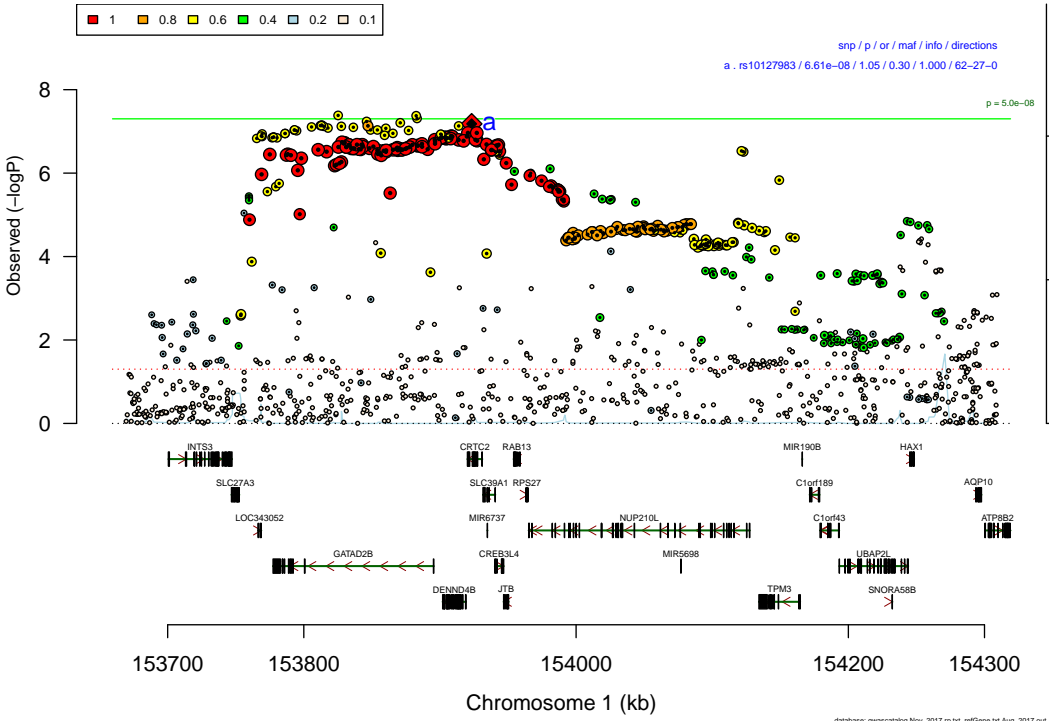

### SCZ\_cond\_rs10127983-chr1

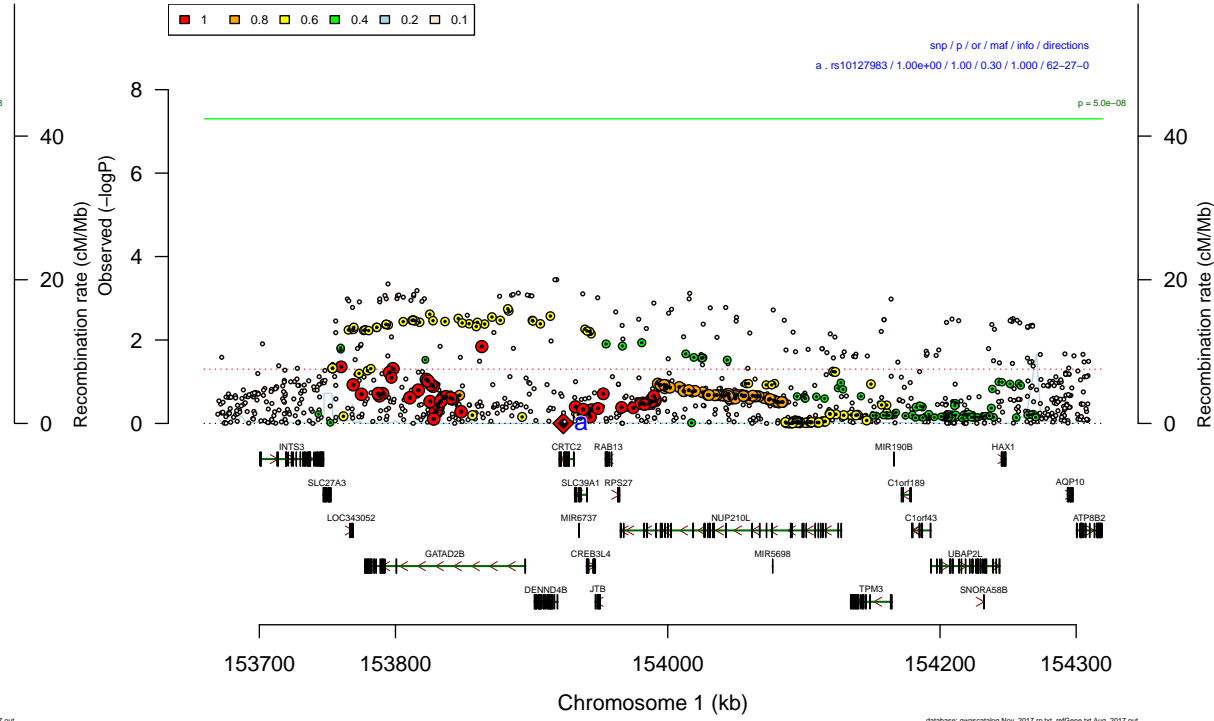



### SCZ\_uncond-rs79445414-chr8

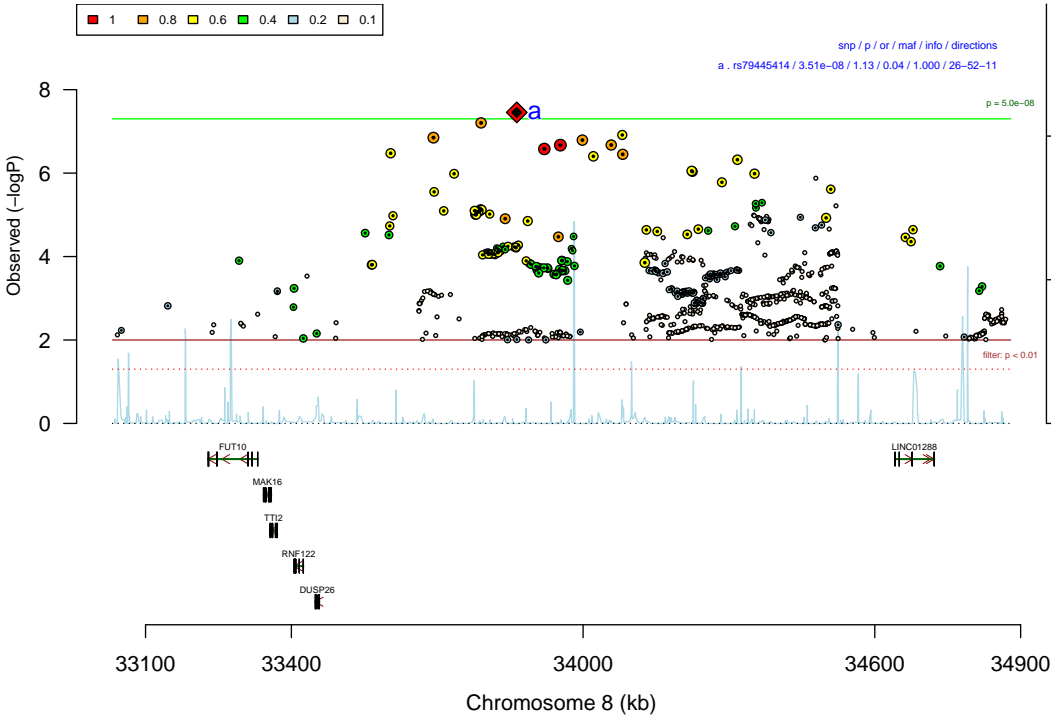

### SCZ\_cond\_rs79445414-chr8

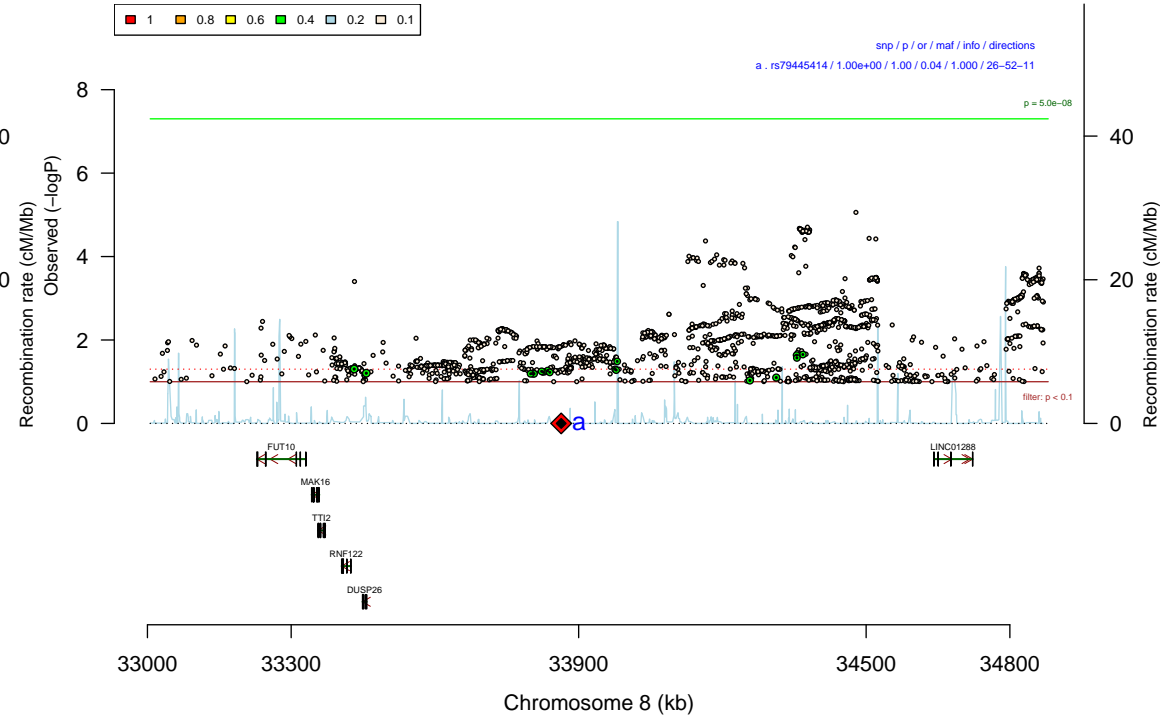

### SCZ\_uncond-rs6010045-chr22

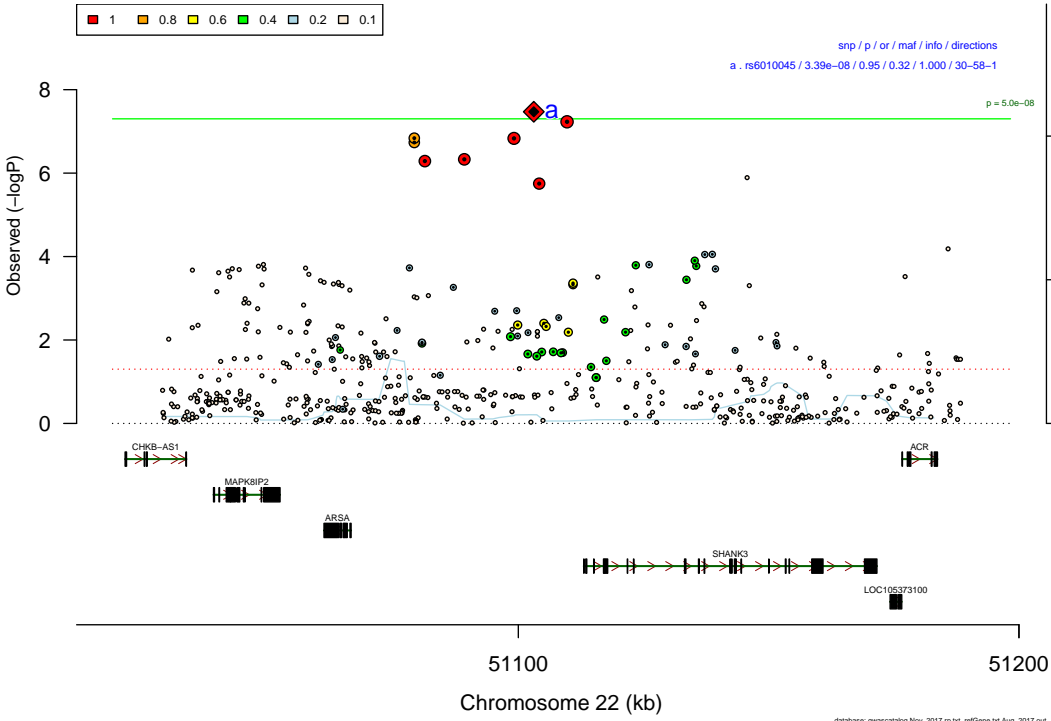

### SCZ\_cond\_rs6010045-chr22

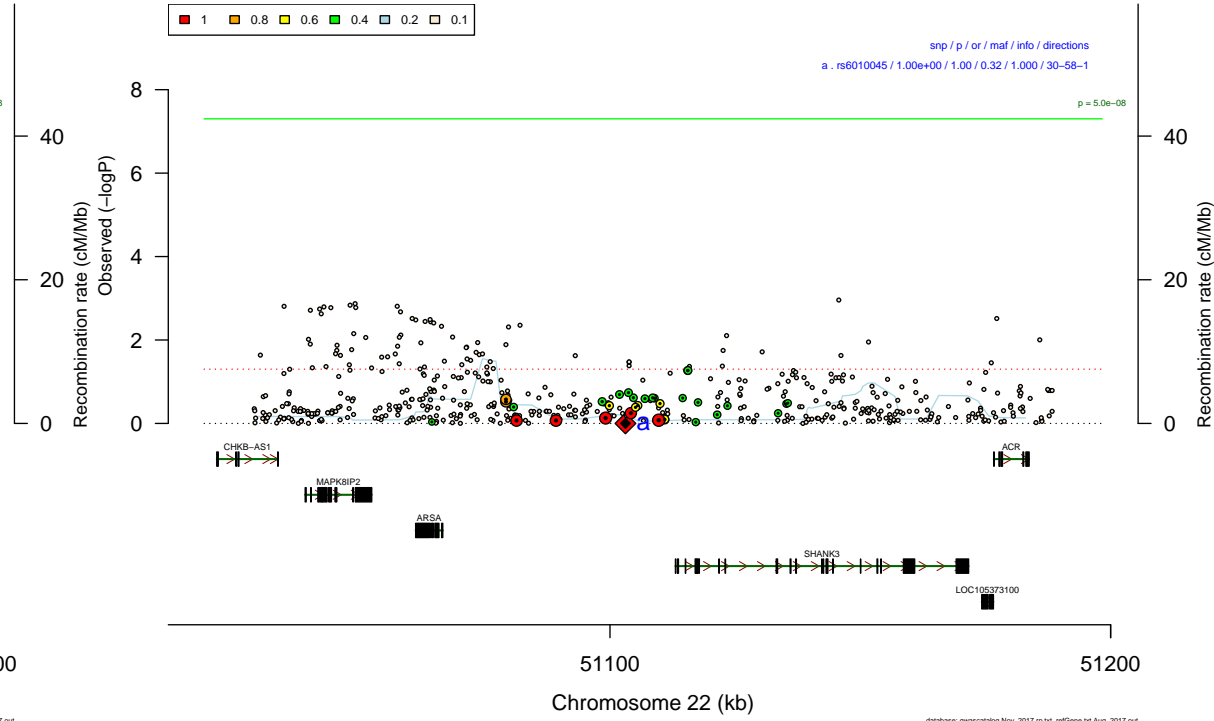

SCZ\_uncond-rs331395-chr5

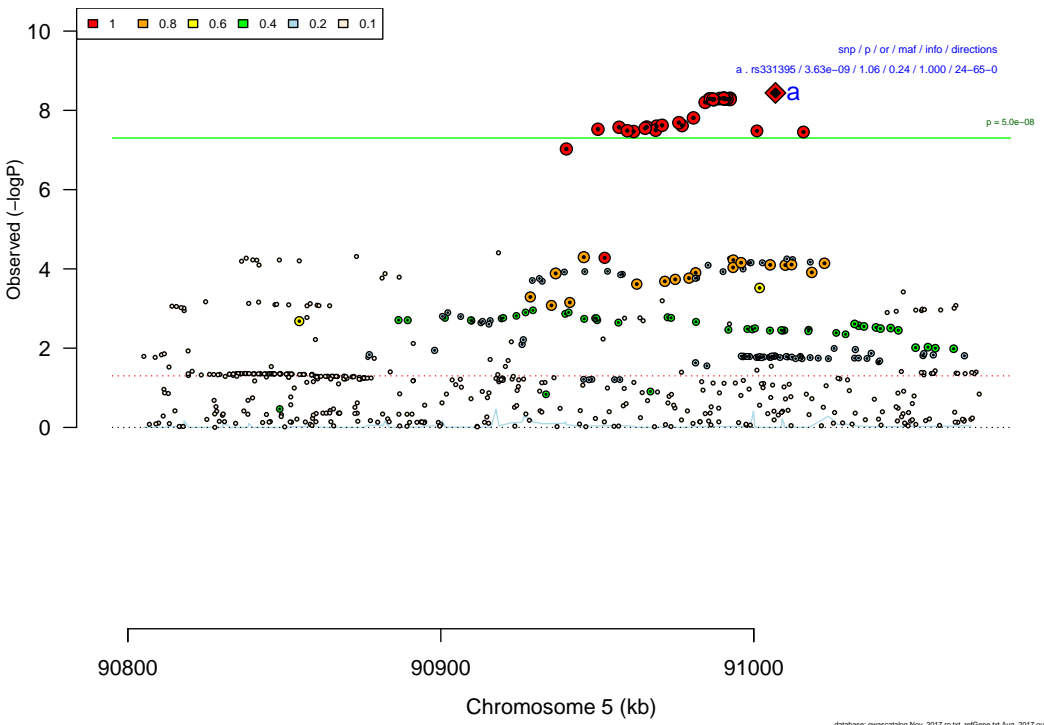

SCZ\_cond\_rs331395-chr5

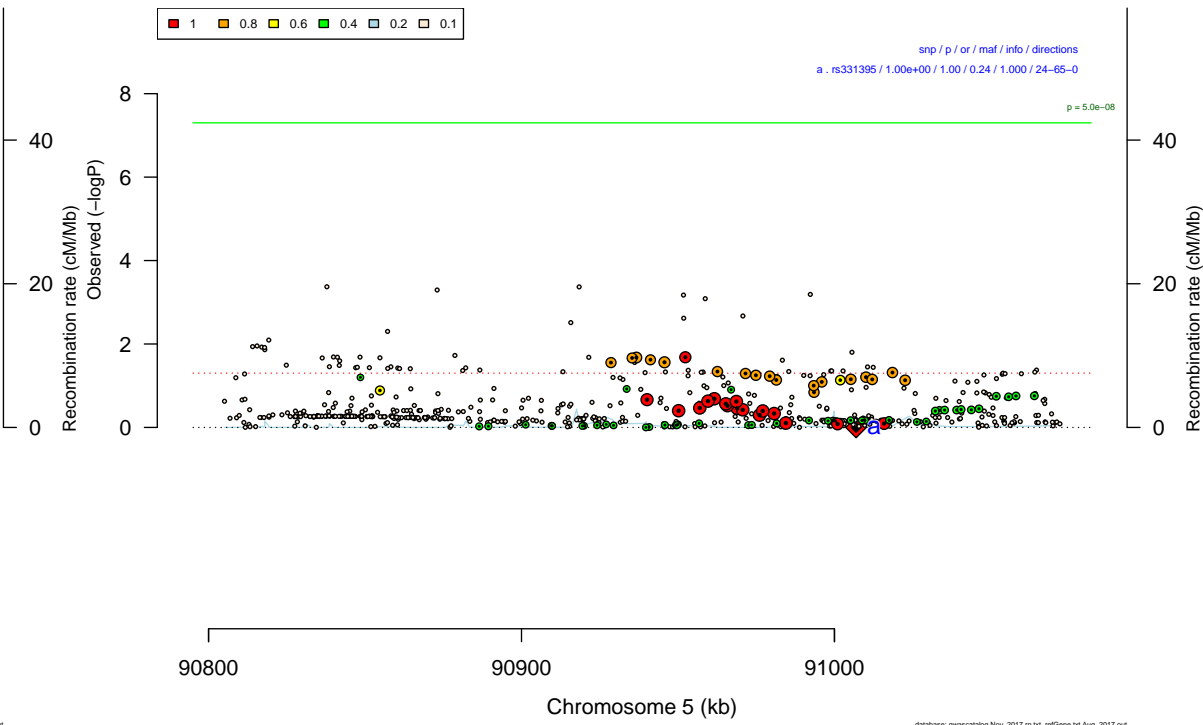

### SCZ\_uncond-rs9390083-chr6

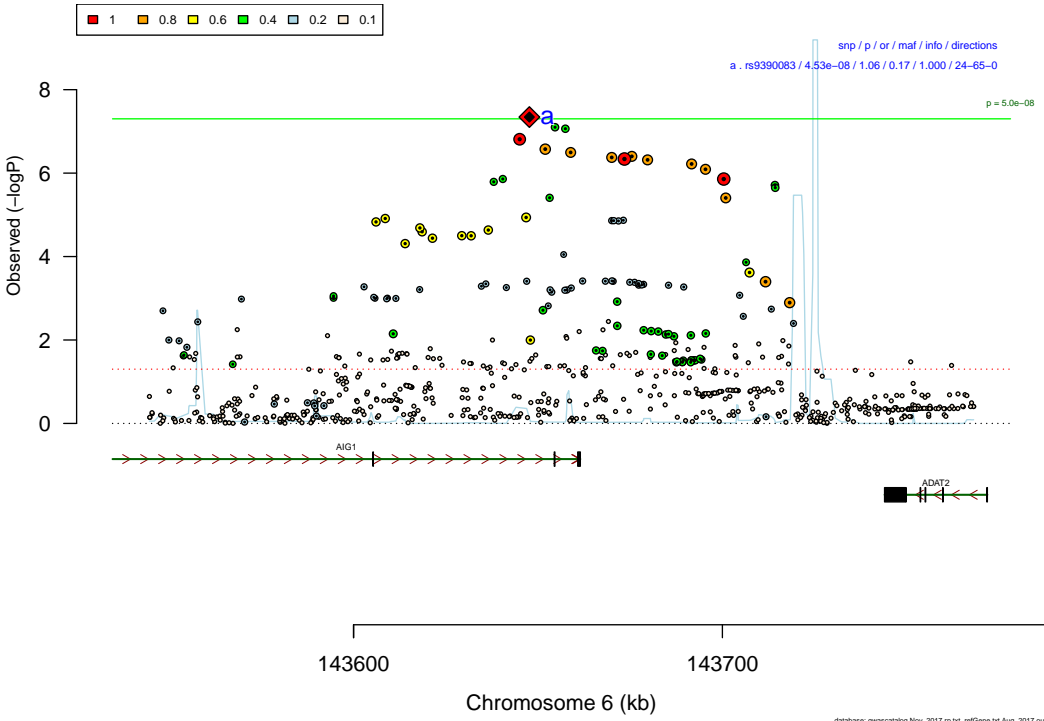

### SCZ\_cond\_rs9390083-chr6

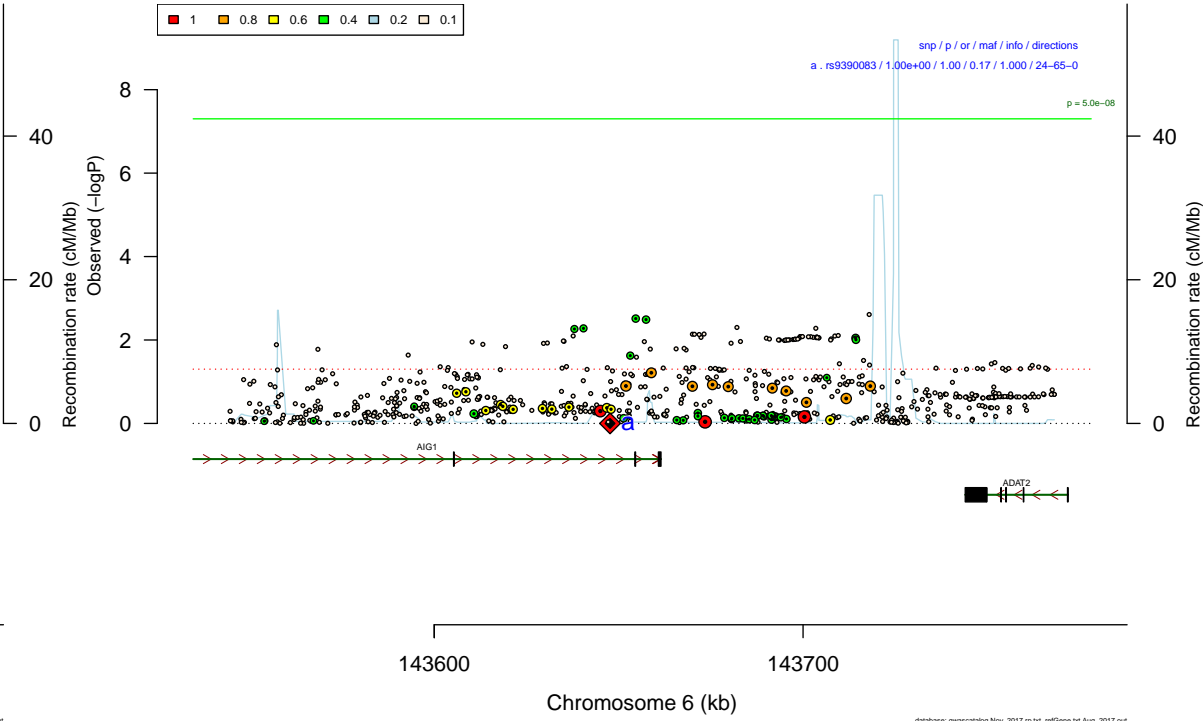

### SCZ\_uncond-rs6479487-chr9

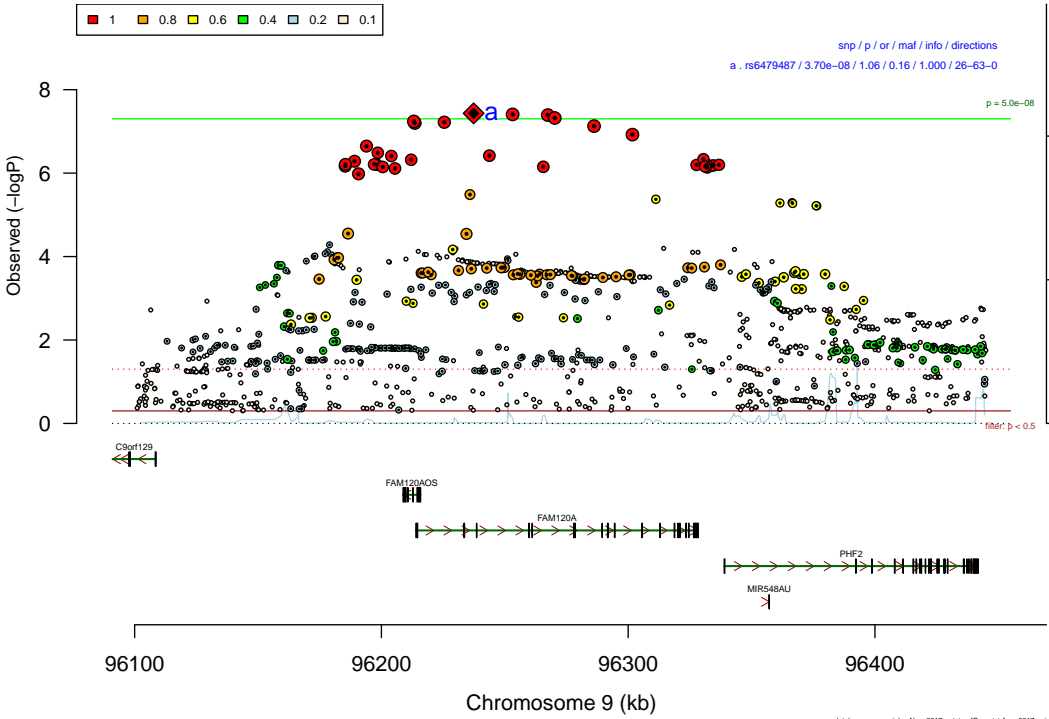

### SCZ\_cond\_rs6479487-chr9

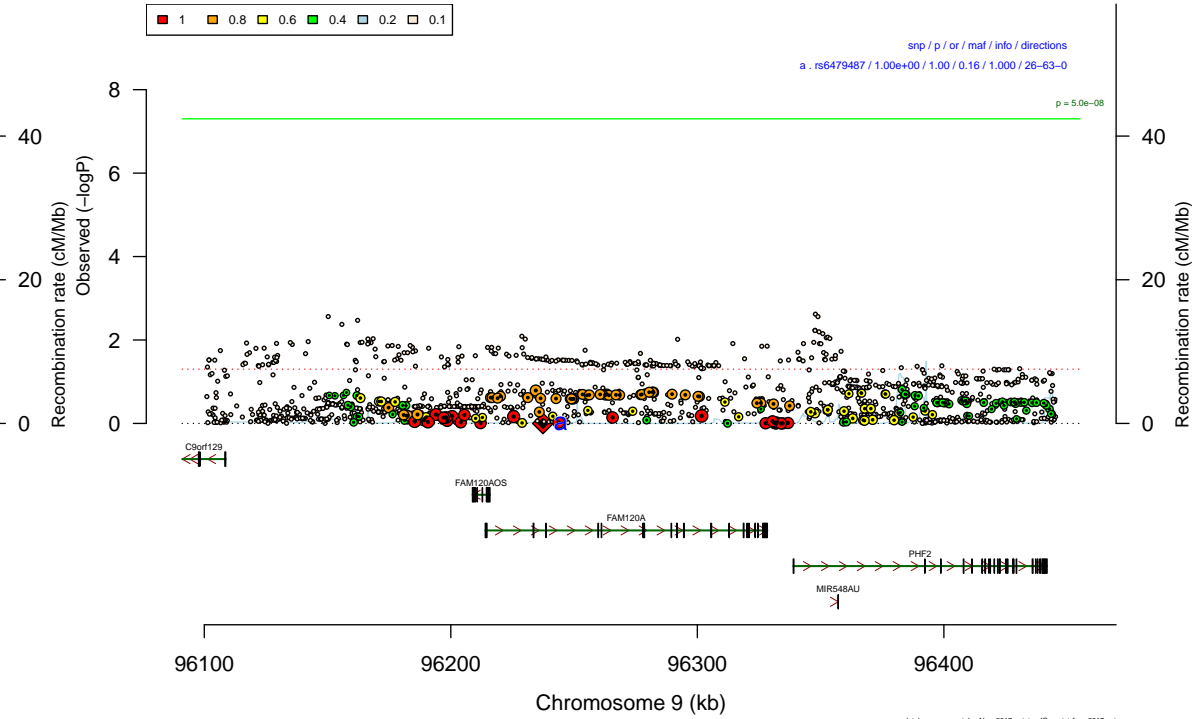

### SCZ\_uncond-rs12474906-chr2

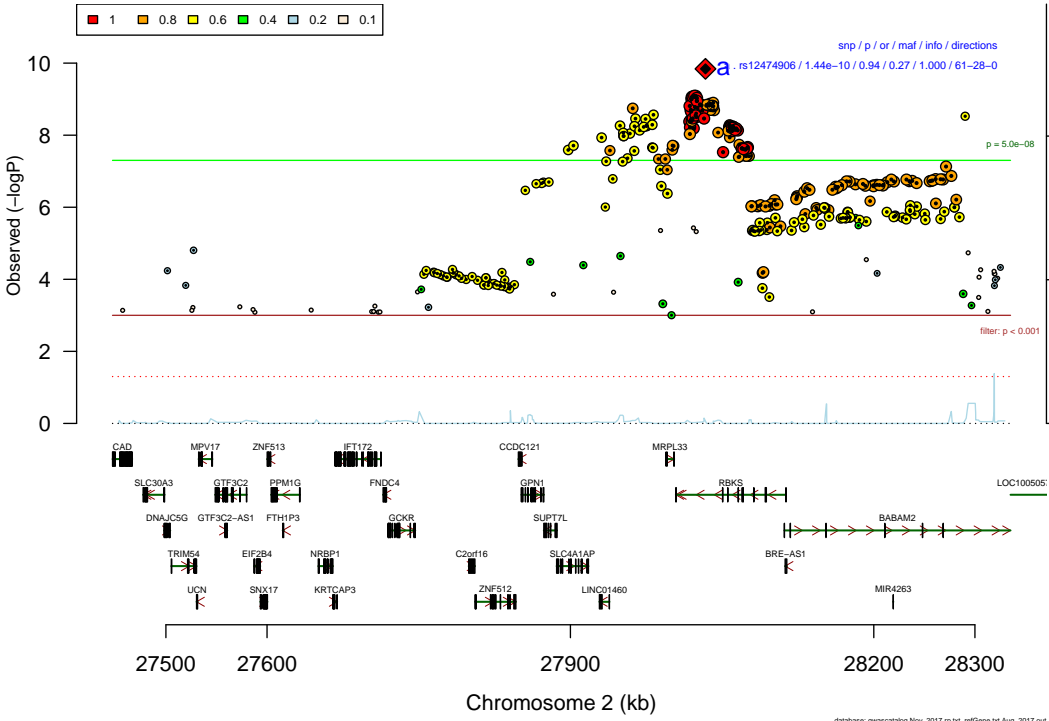

### SCZ\_cond\_rs12474906-chr2

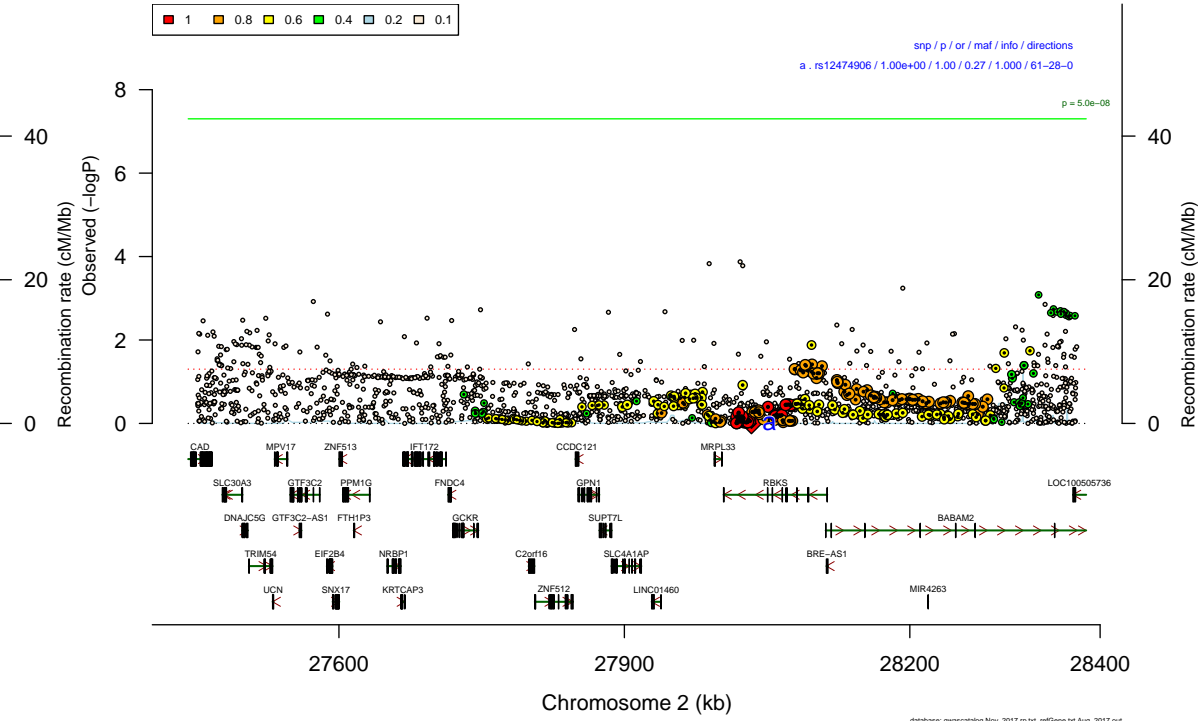

### SCZ\_uncond-rs144821294-chr19

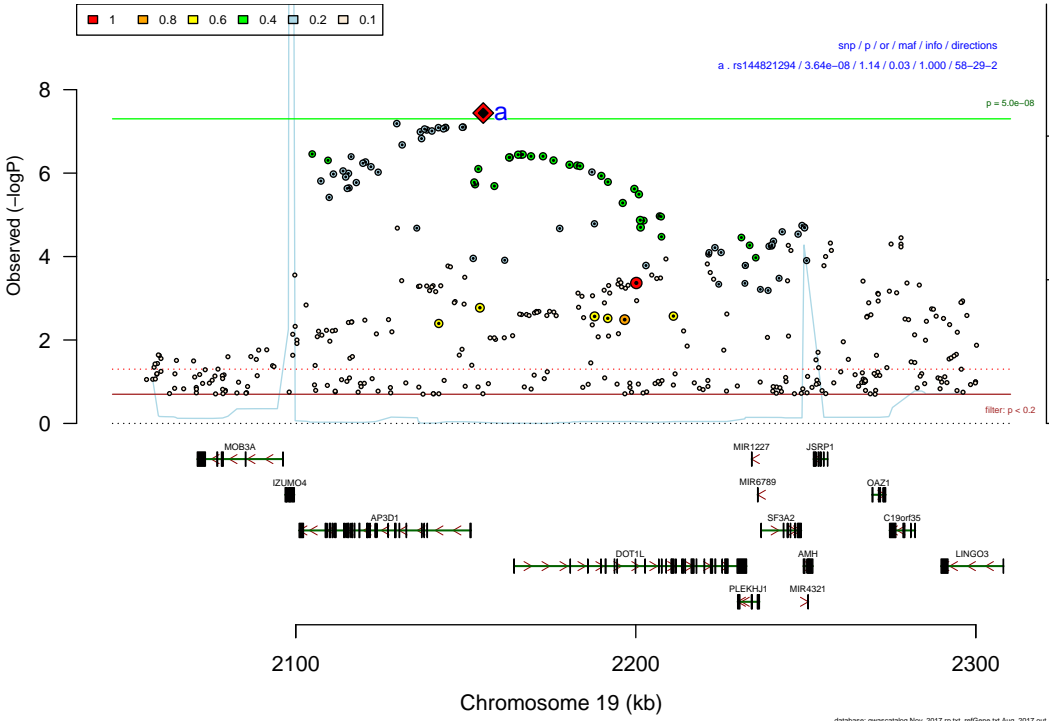

### SCZ\_cond\_rs144821294-chr19

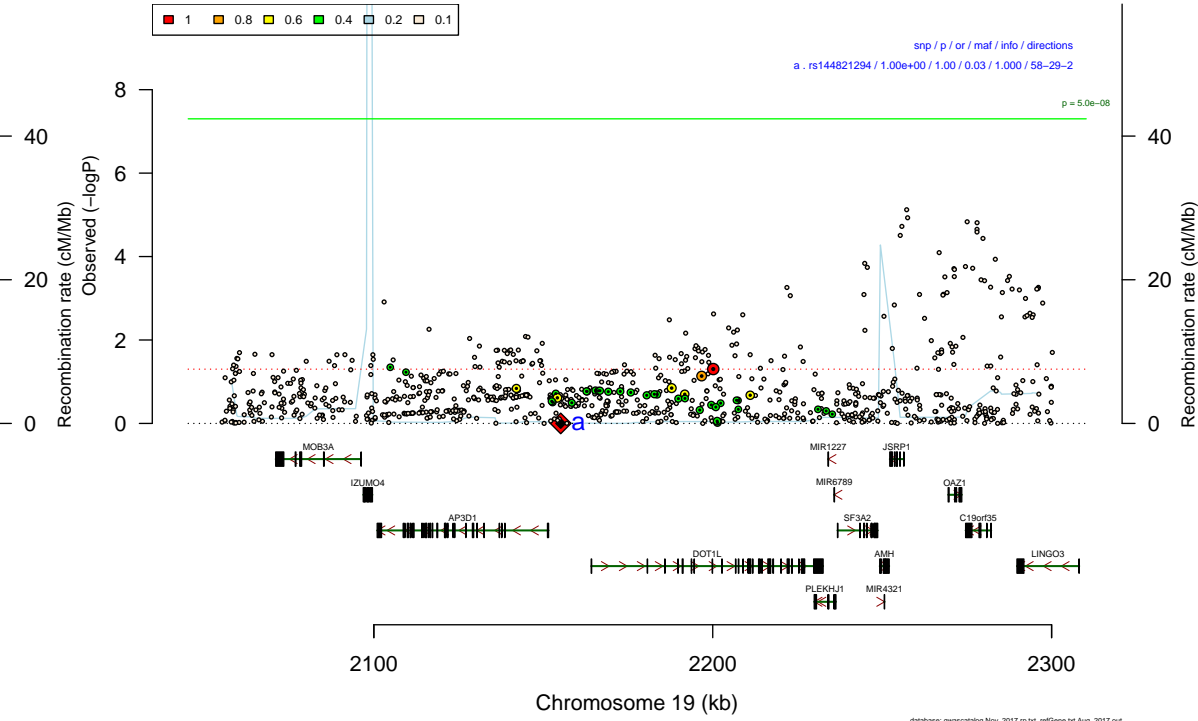

### SCZ\_uncond-rs11897811-chr2

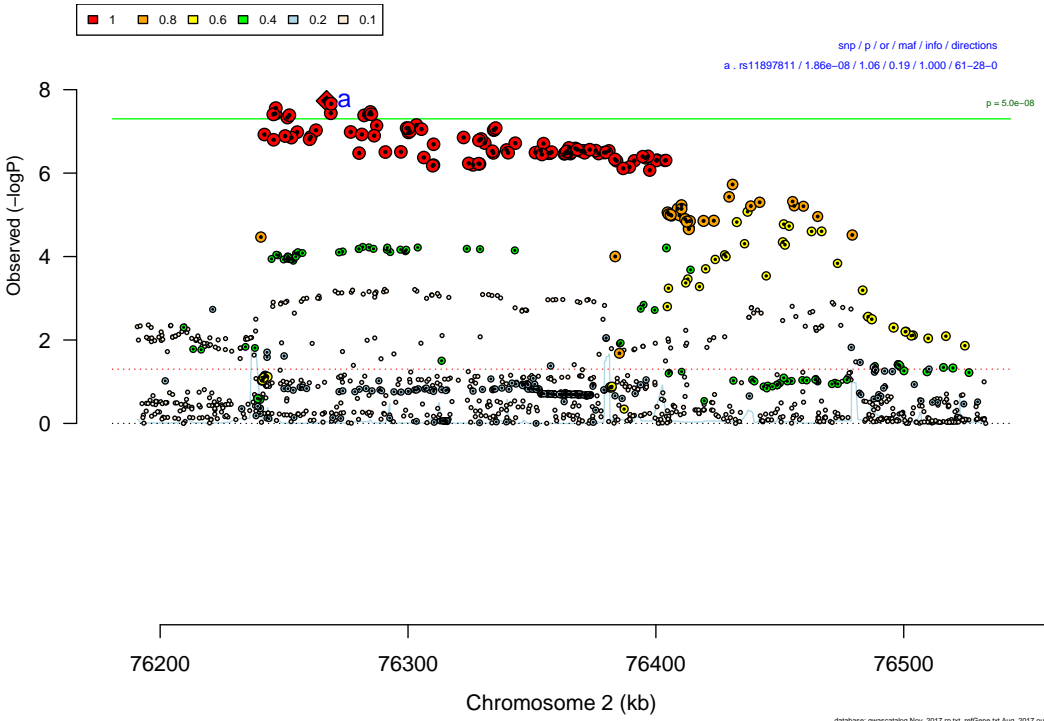

### SCZ\_cond\_rs11897811-chr2

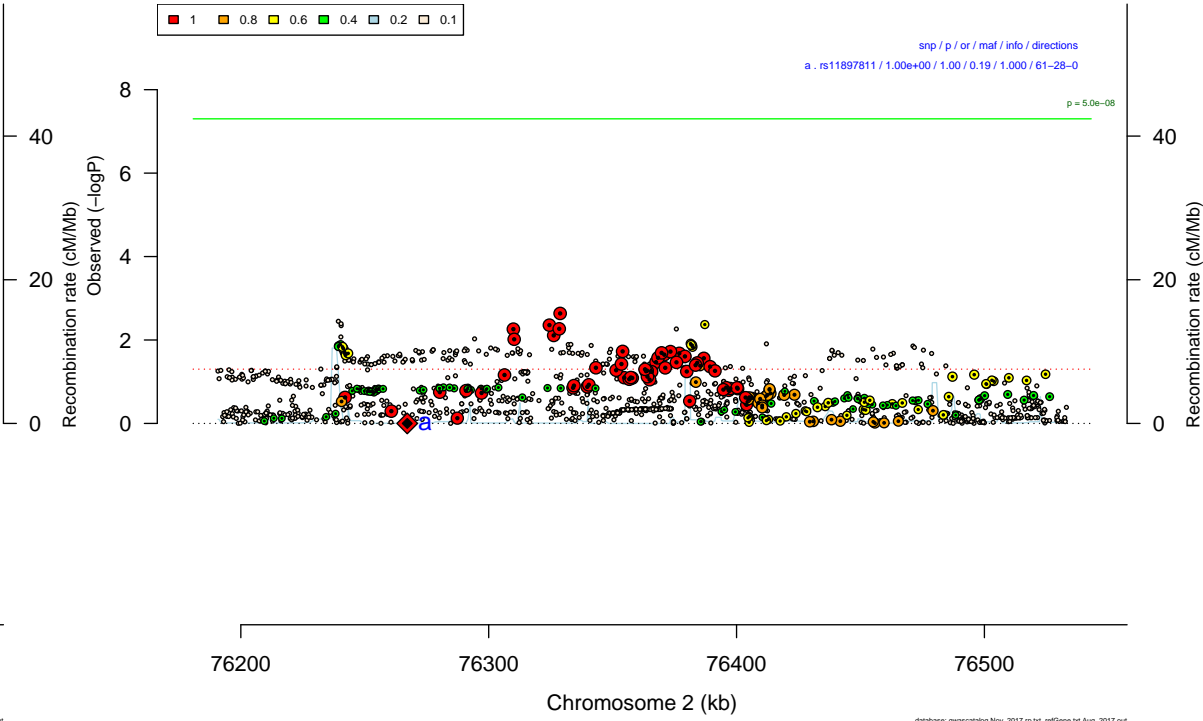



### SCZ\_uncond-rs10777187-chr12

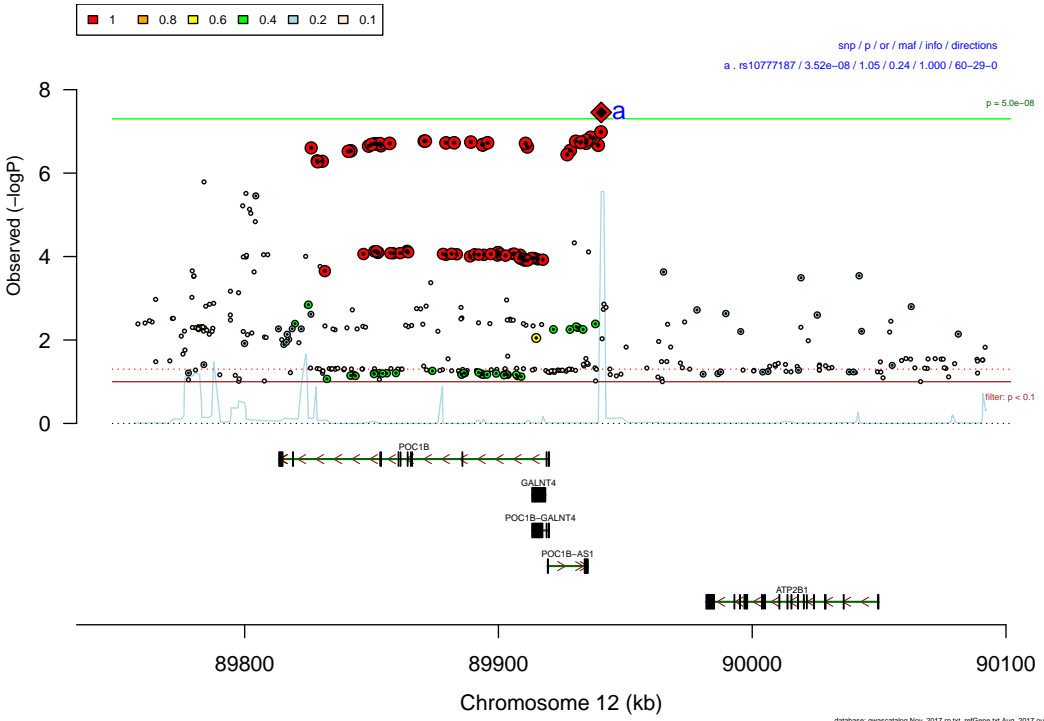

### SCZ\_cond\_rs10777187-chr12

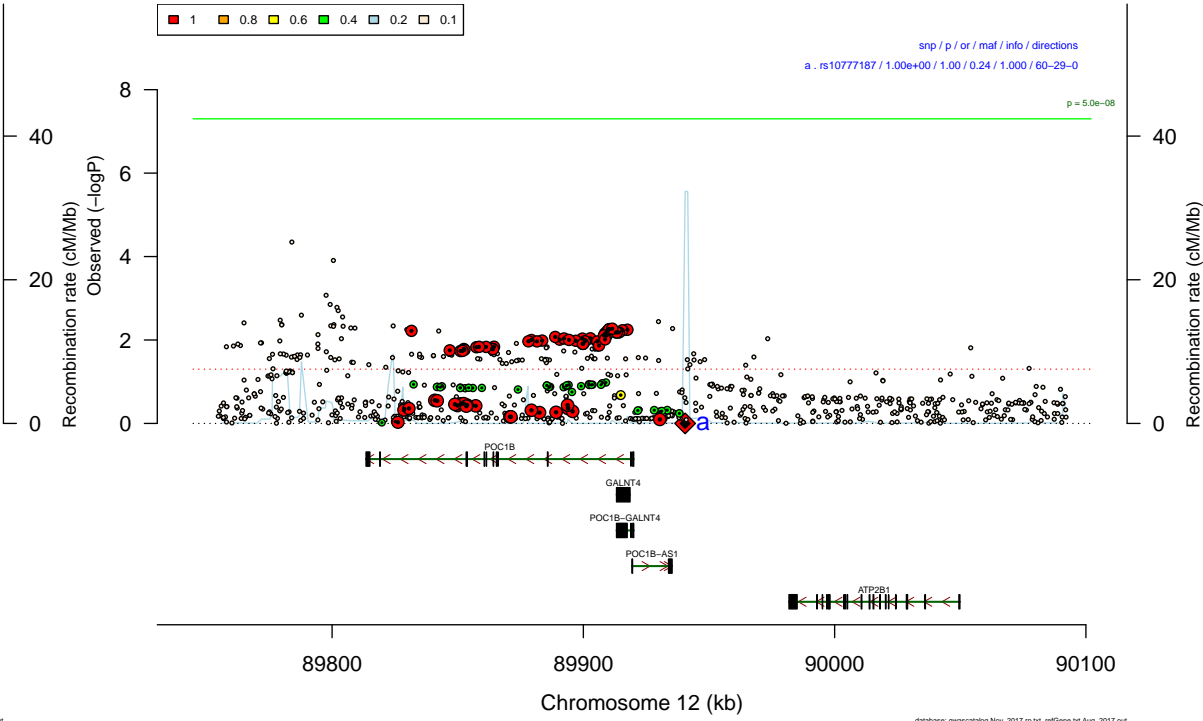

### SCZ\_uncond-rs10861176-chr12

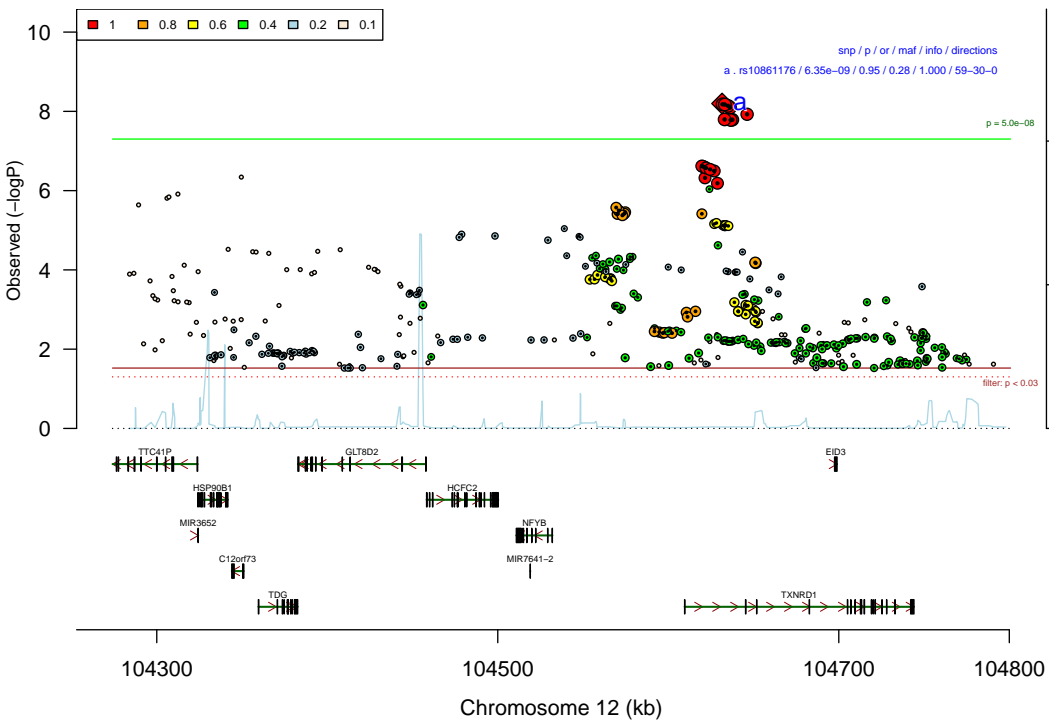

### SCZ\_cond\_rs10861176-chr12

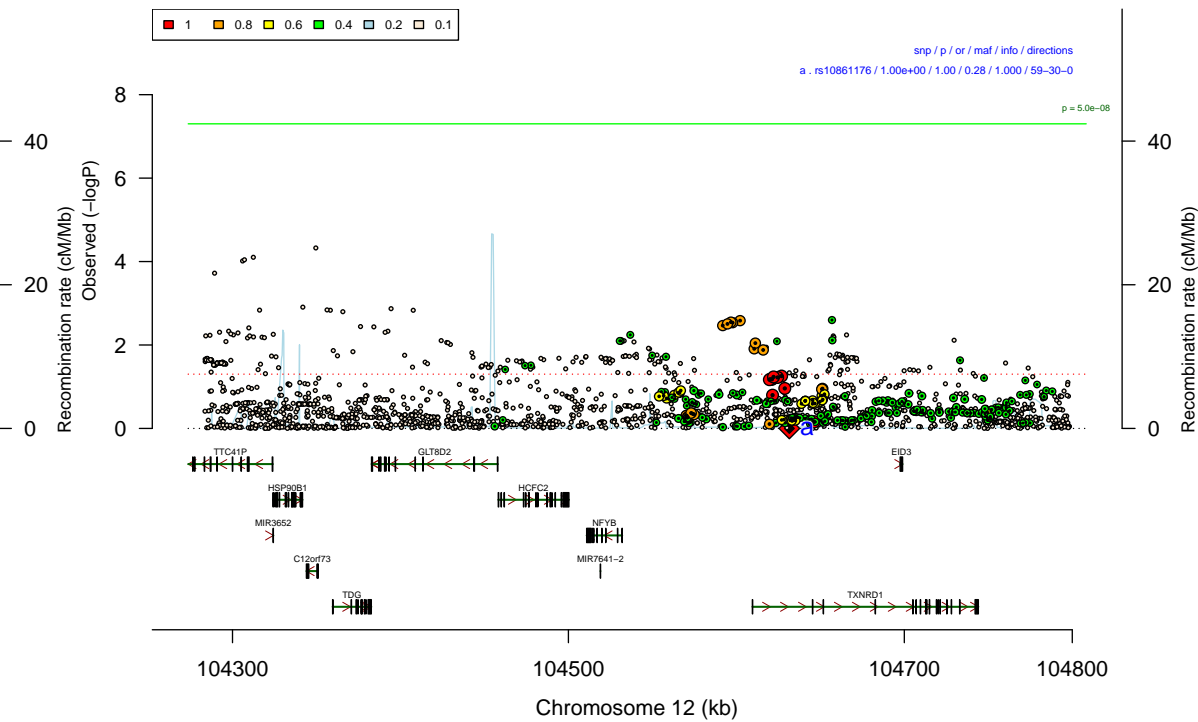

### SCZ\_uncond-rs10243922-chr7

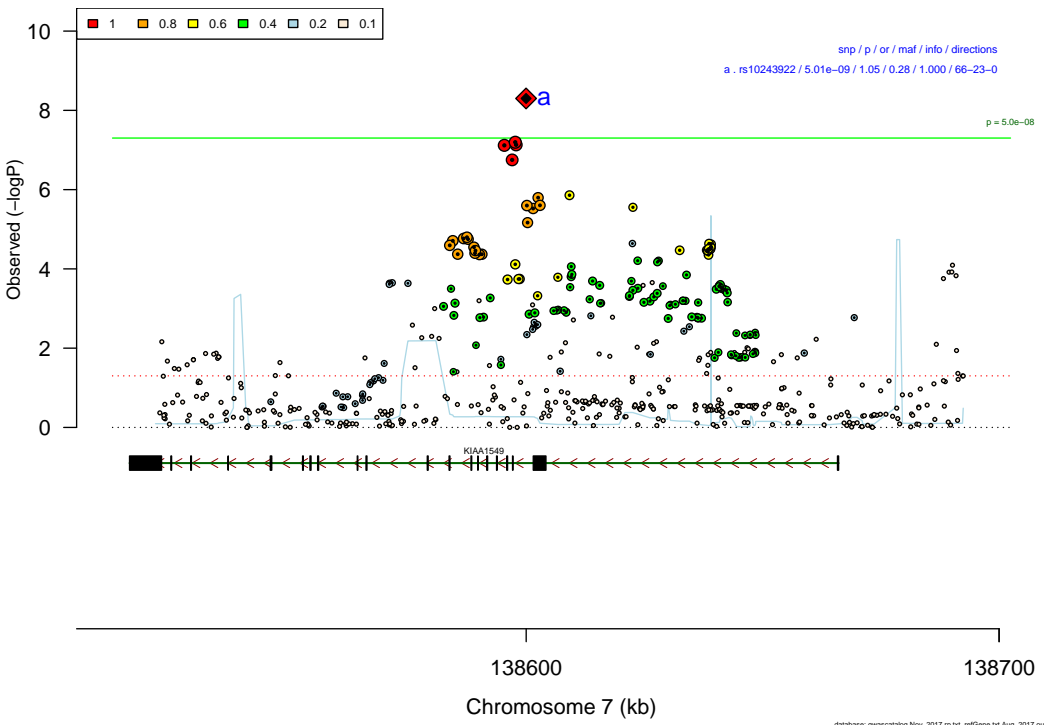

### SCZ\_cond\_rs10243922-chr7

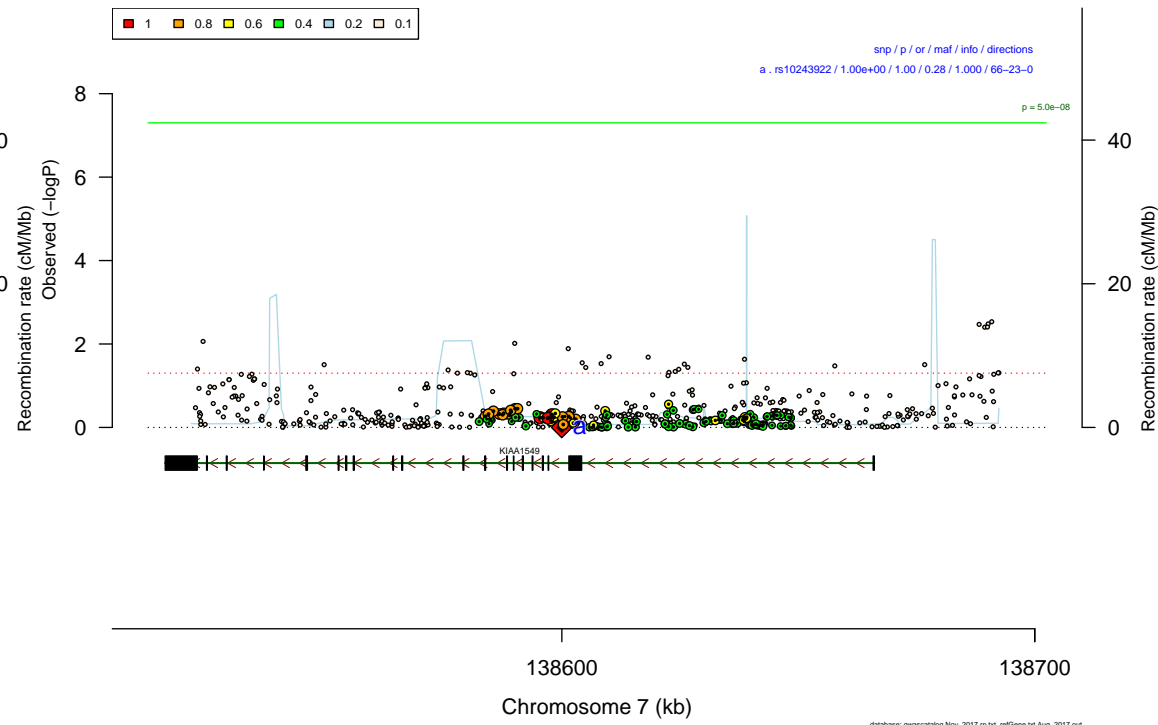

### SCZ\_uncond-rs6546857-chr2

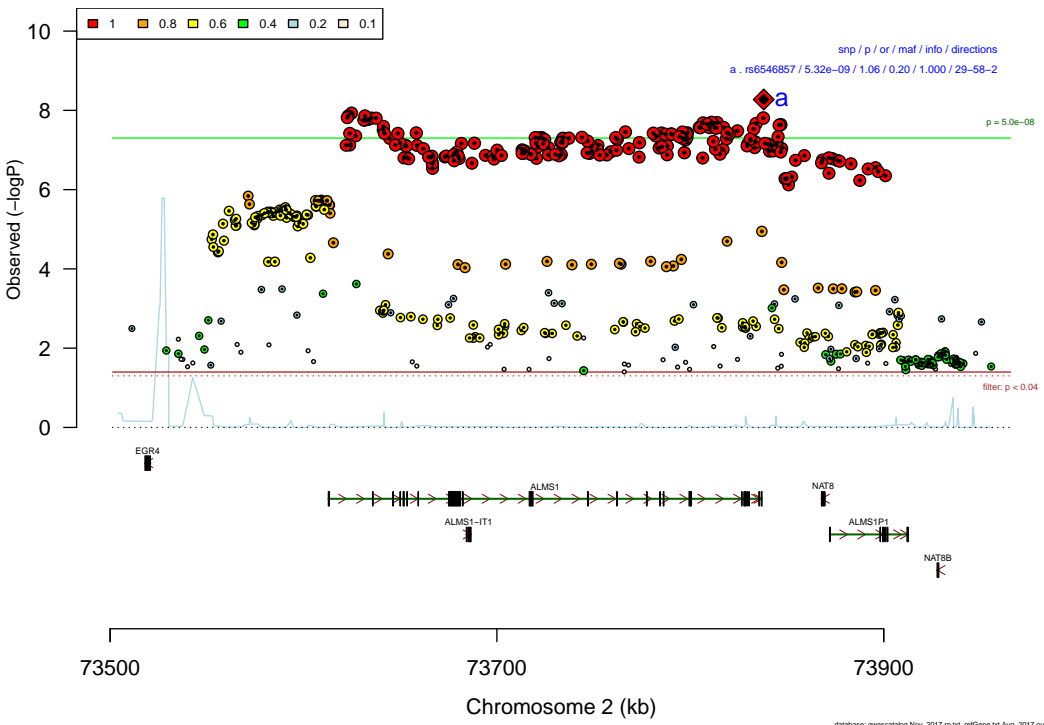

### SCZ\_cond\_rs6546857-chr2

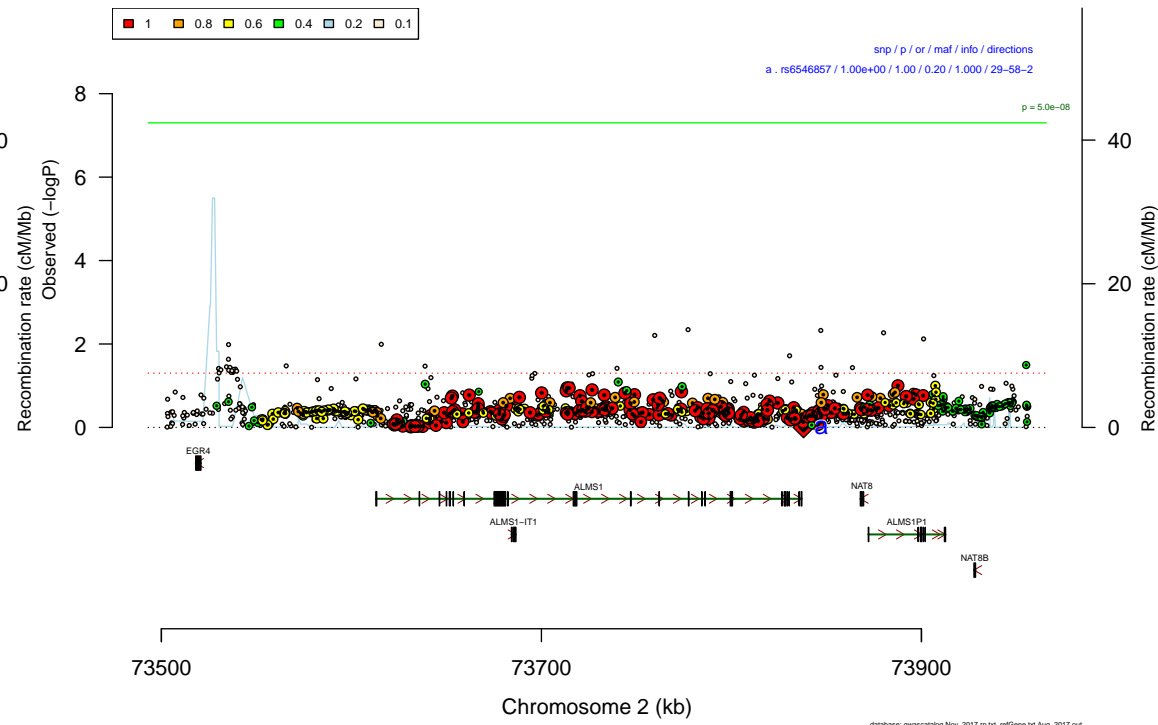

### SCZ\_uncond-rs215483-chr4

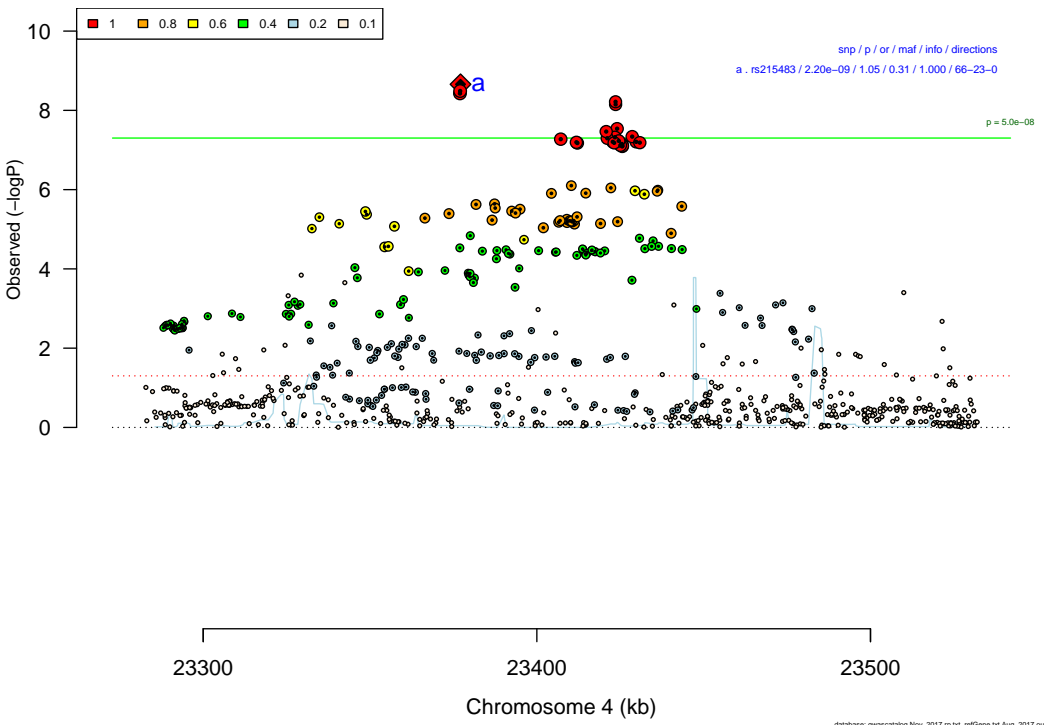

### SCZ\_cond\_rs215483-chr4

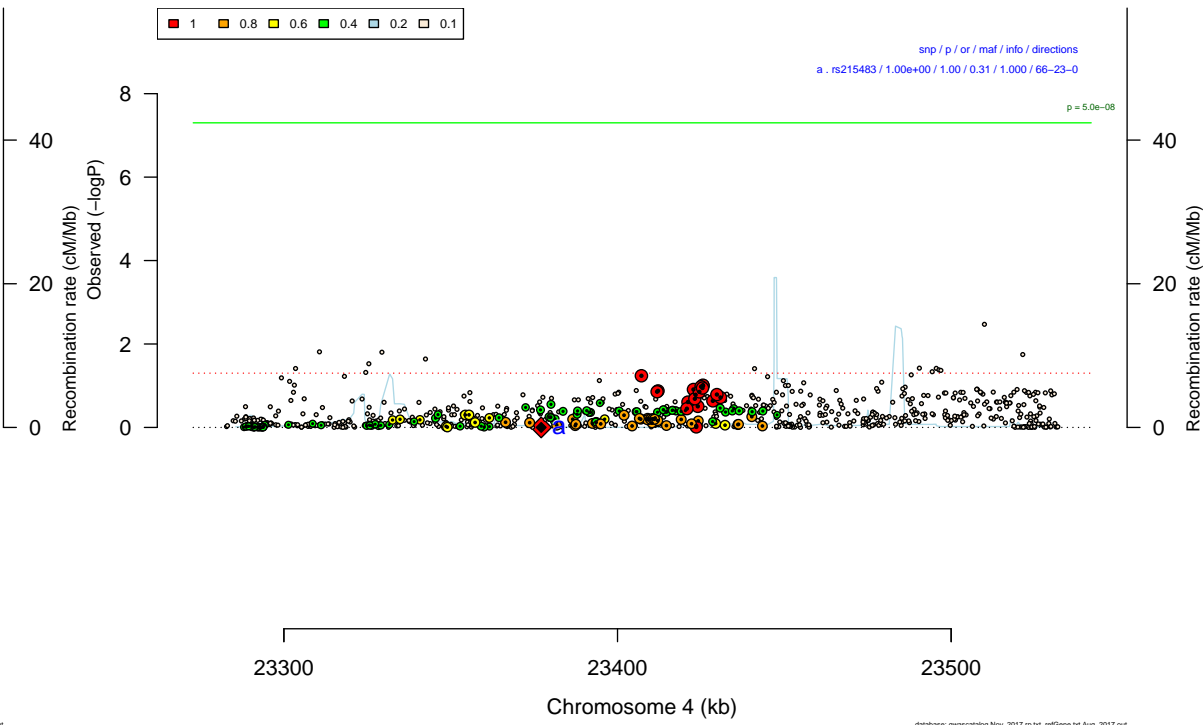

### SCZ\_uncond-rs11647188-chr16

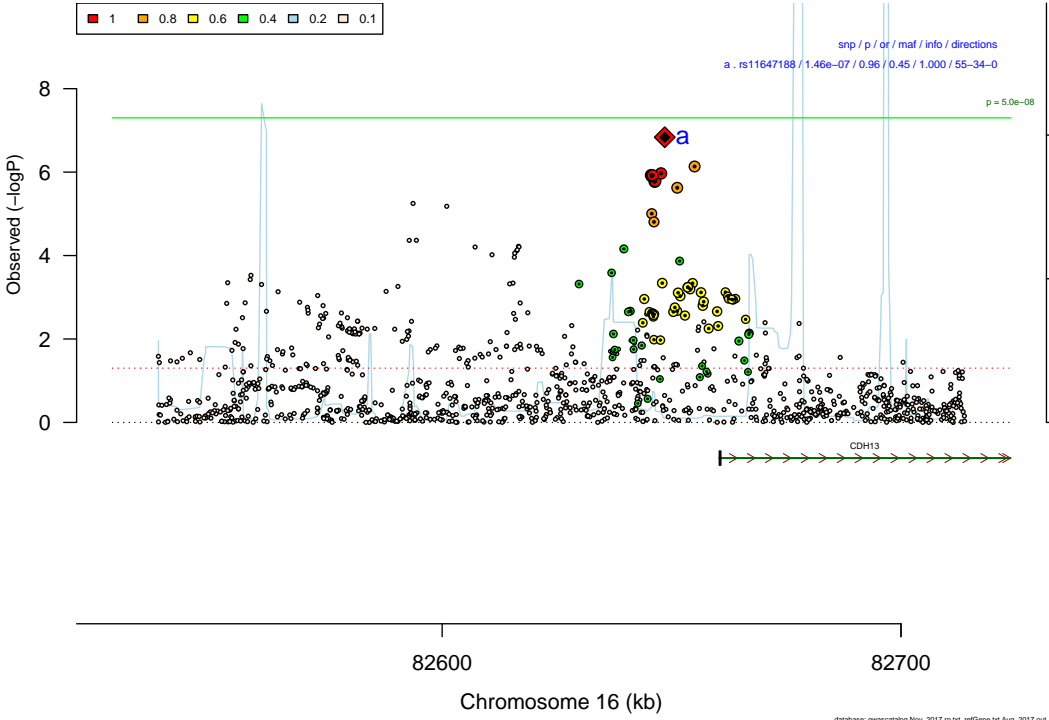

### SCZ\_cond\_rs11647188-chr16

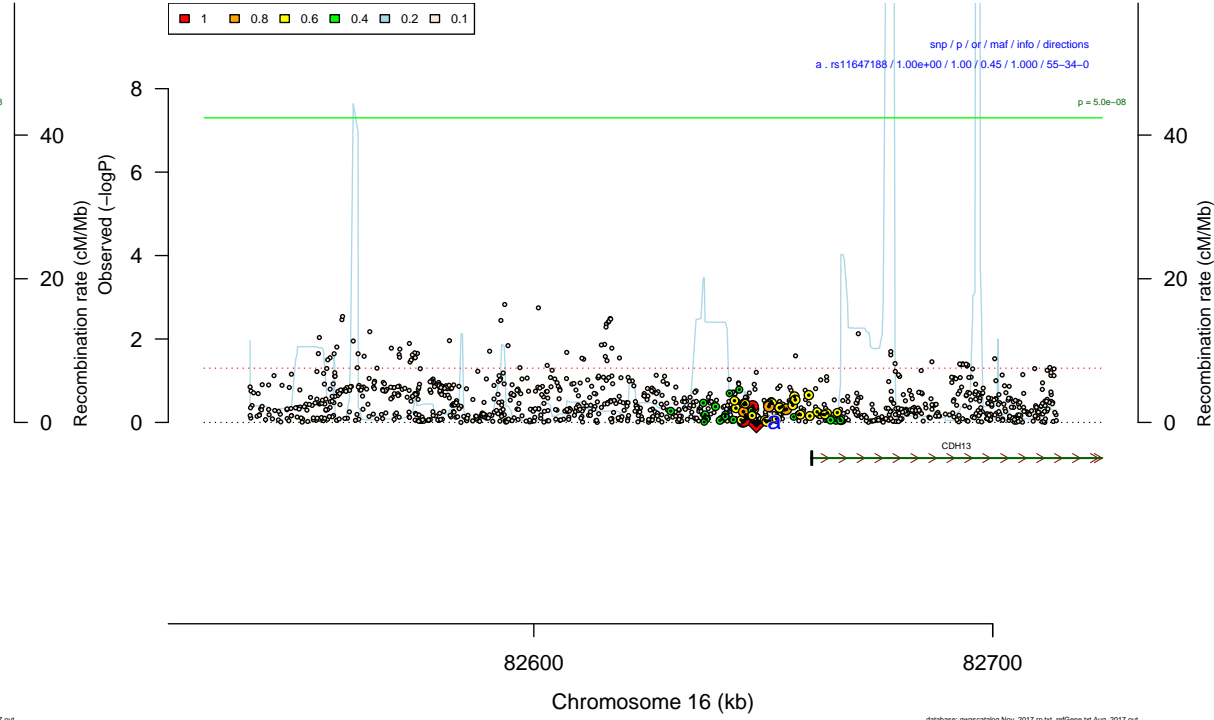

### SCZ\_uncond-rs61786047-chr1

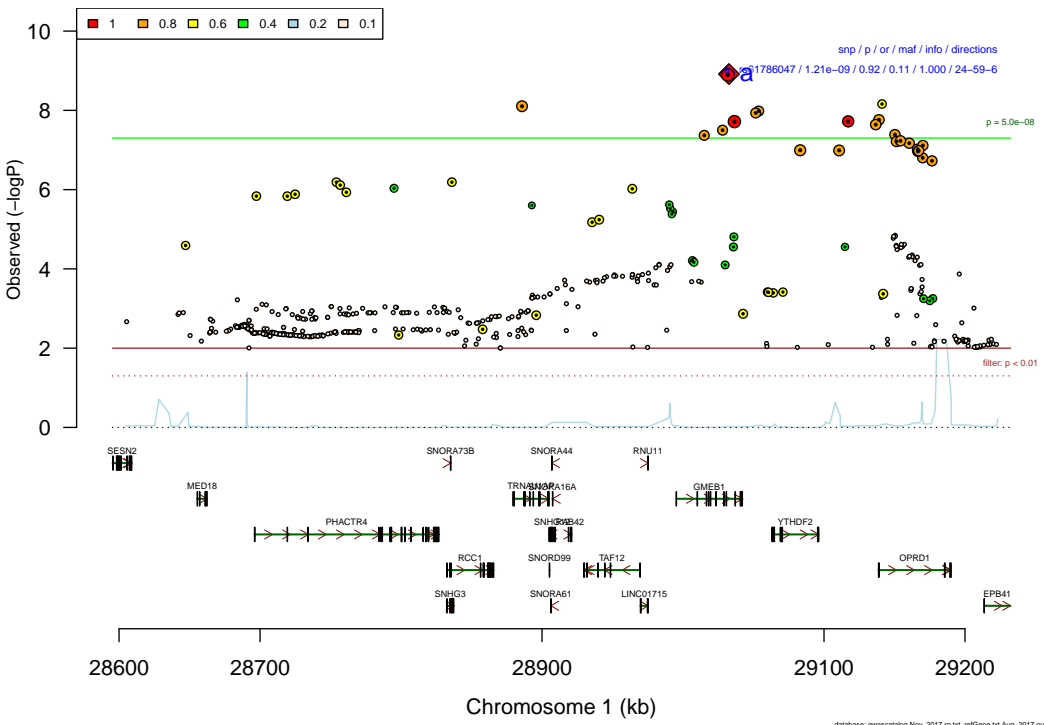

### SCZ\_cond\_rs61786047-chr1

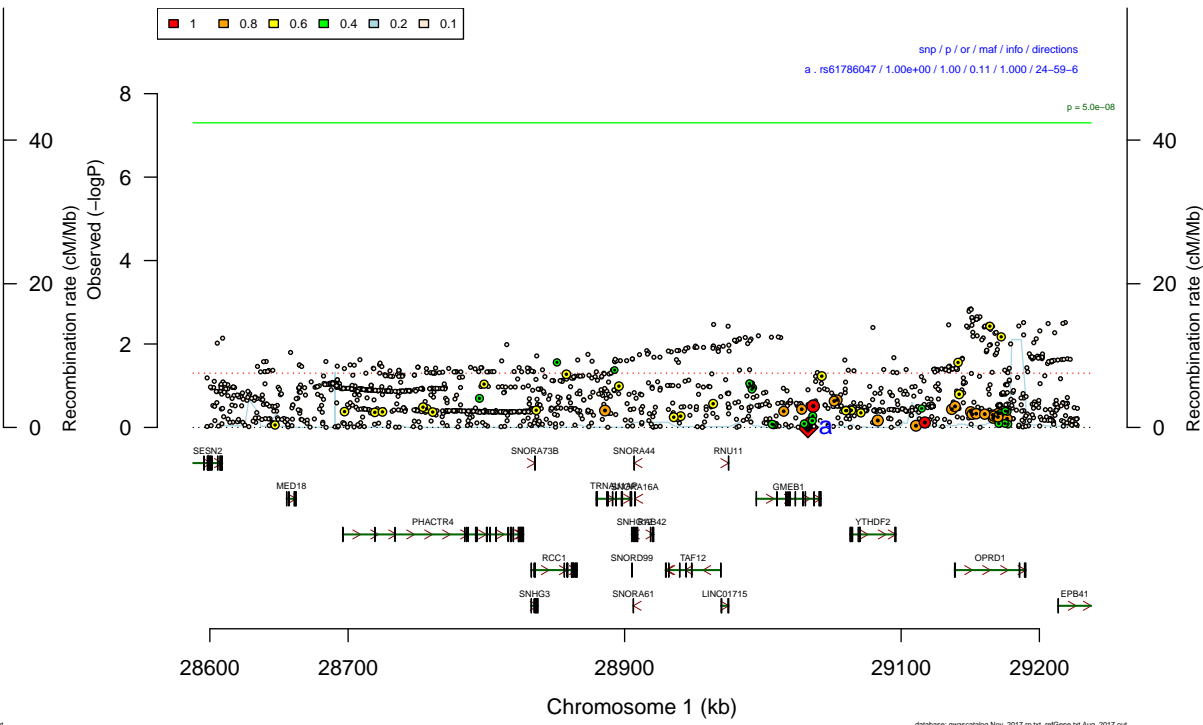

### SCZ\_uncond-rs2890914-chr9

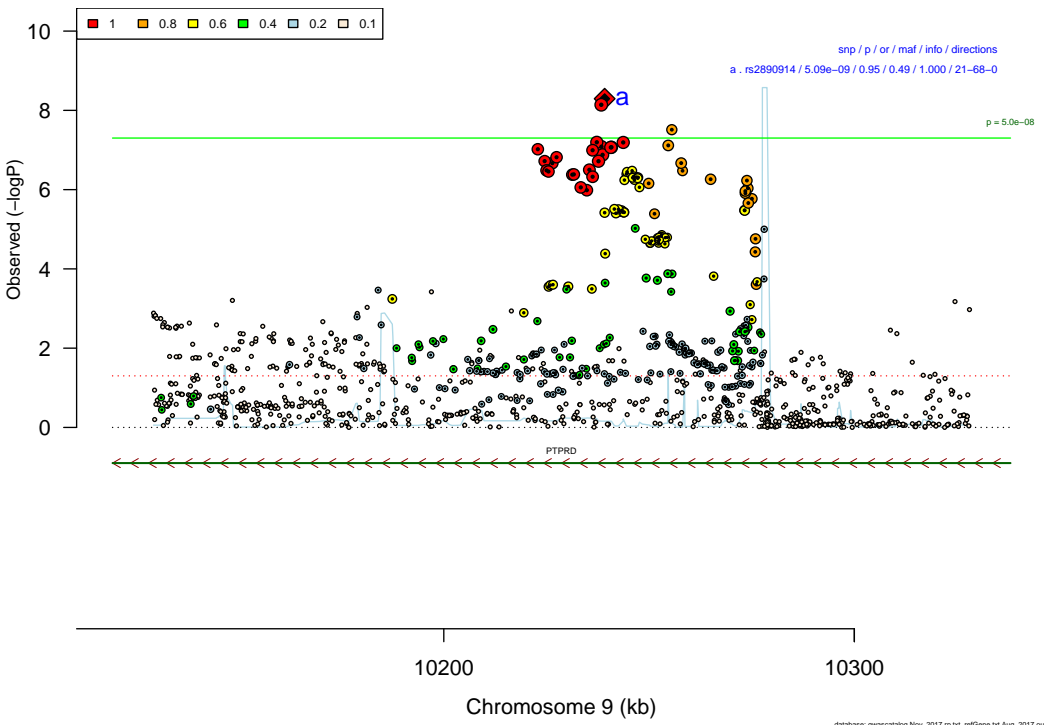

### SCZ\_cond\_rs2890914-chr9

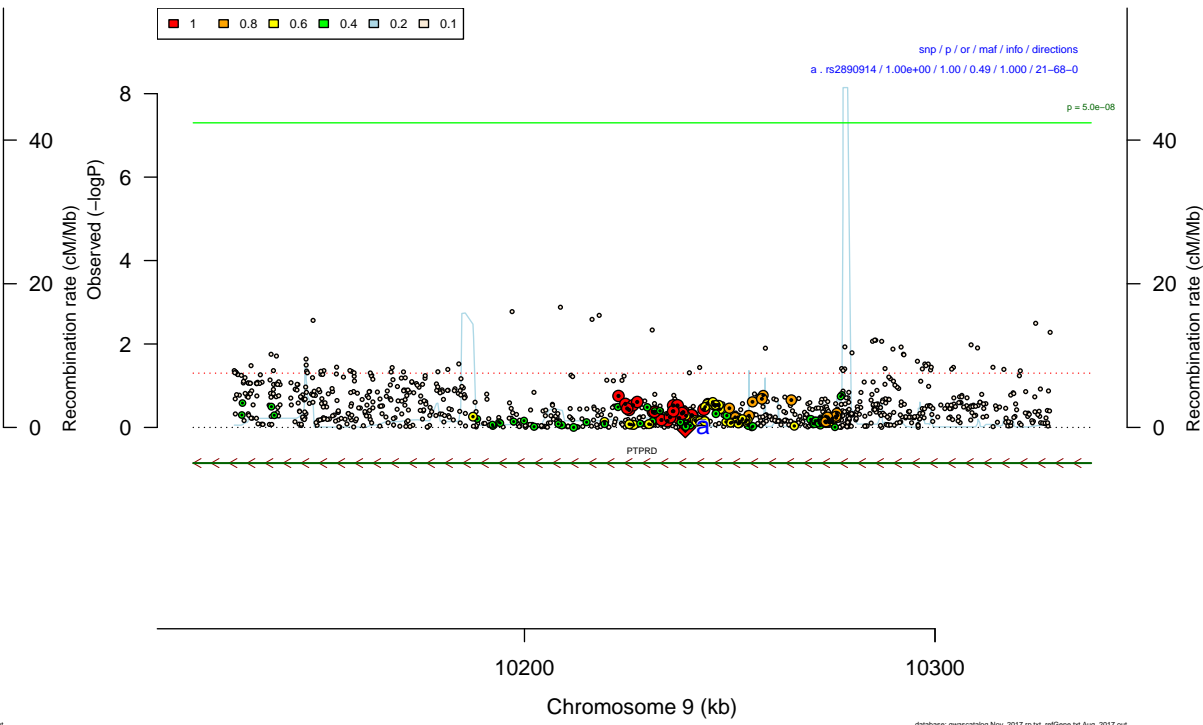



### SCZ\_uncond-rs500102-chr9

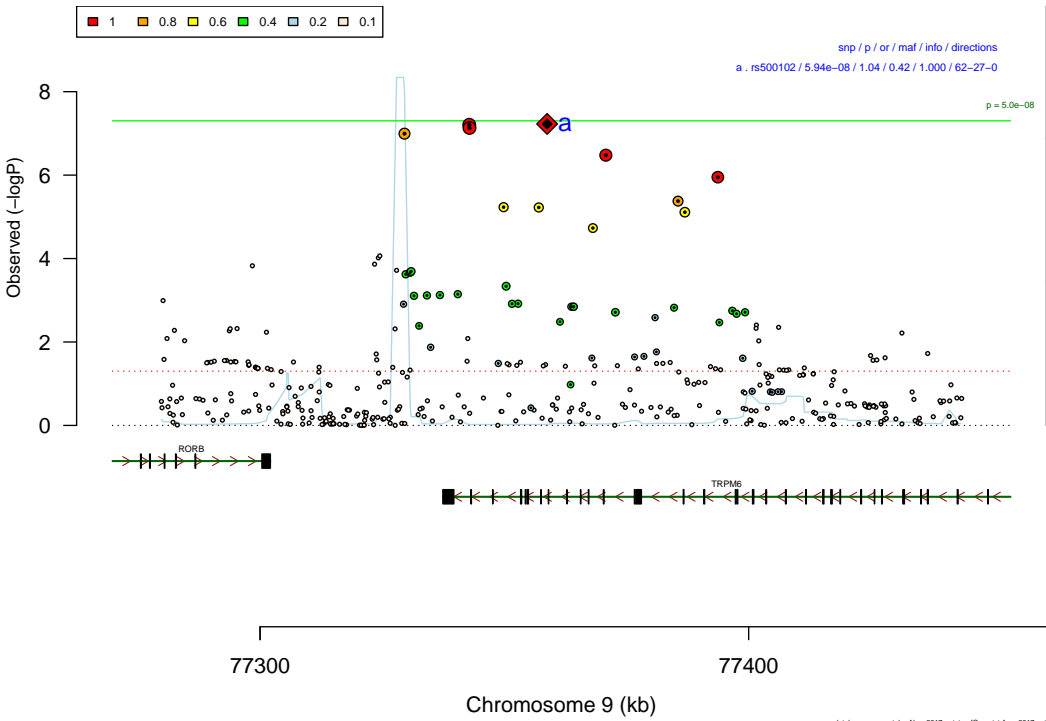

### SCZ\_cond\_rs500102-chr9

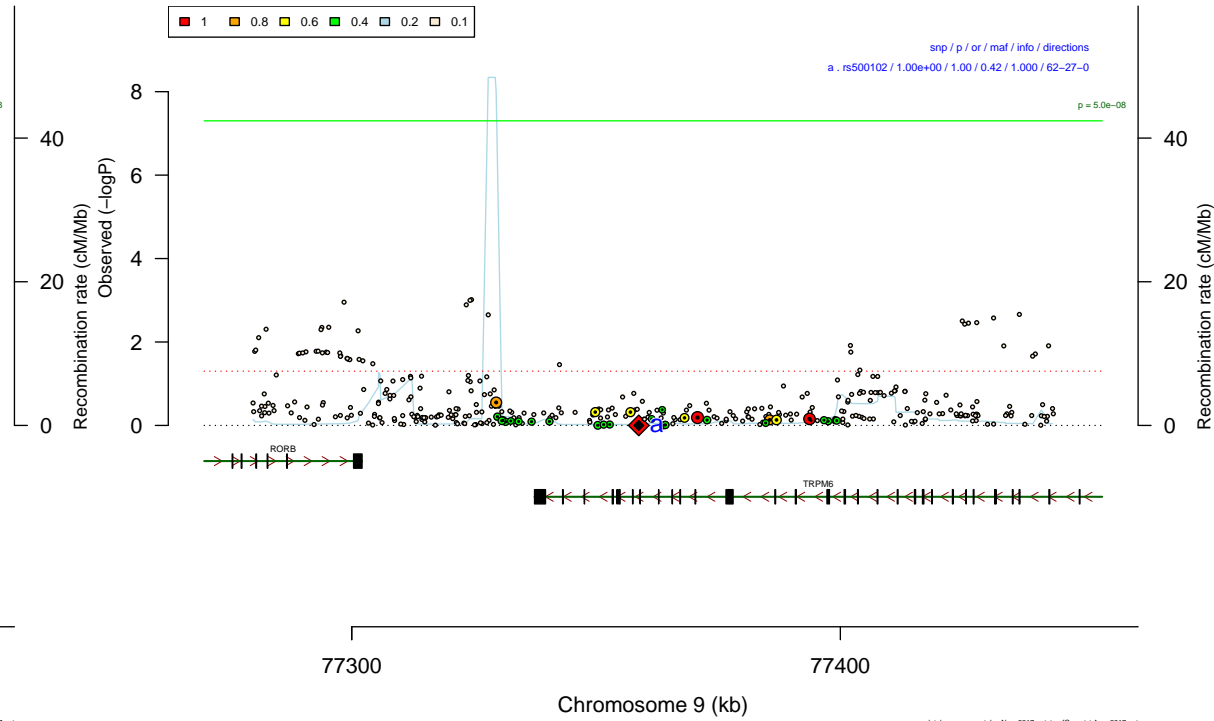

### SCZ\_uncond-rs337718-chr18

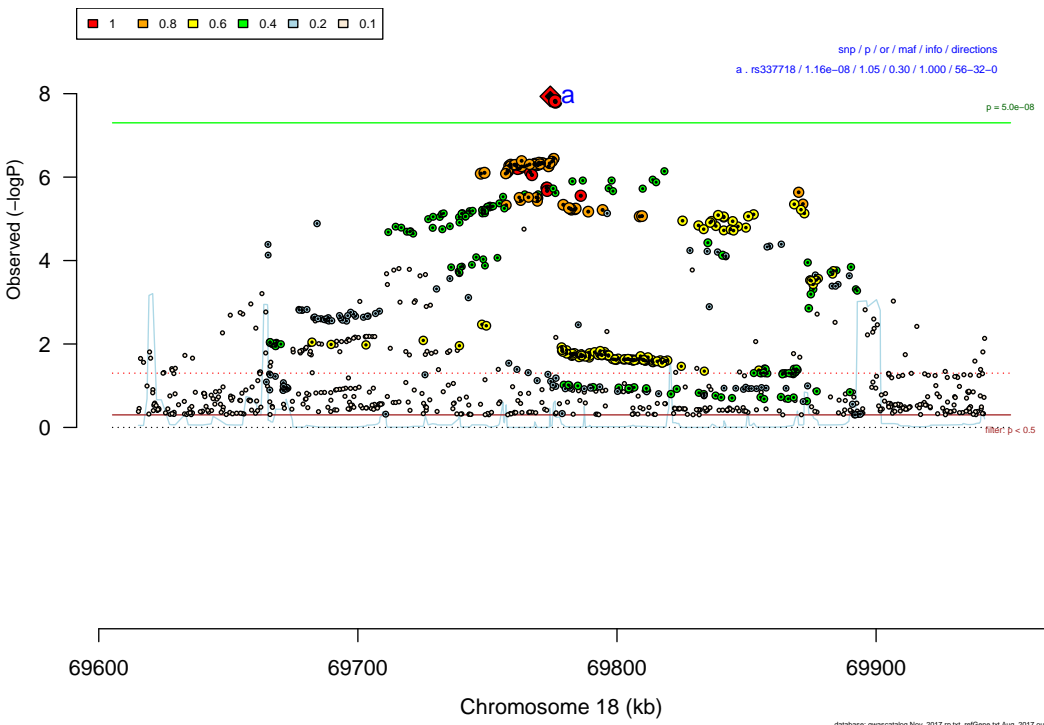

### SCZ\_cond\_rs337718-chr18

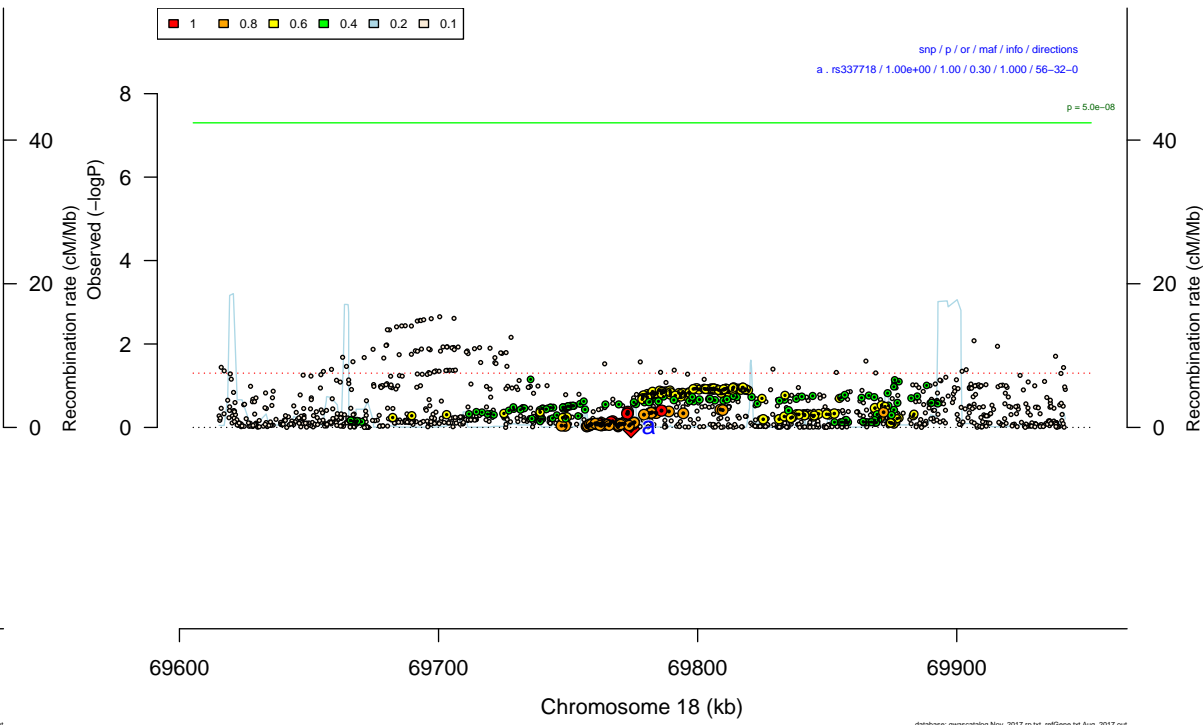

### SCZ\_uncond-rs7609876-chr3

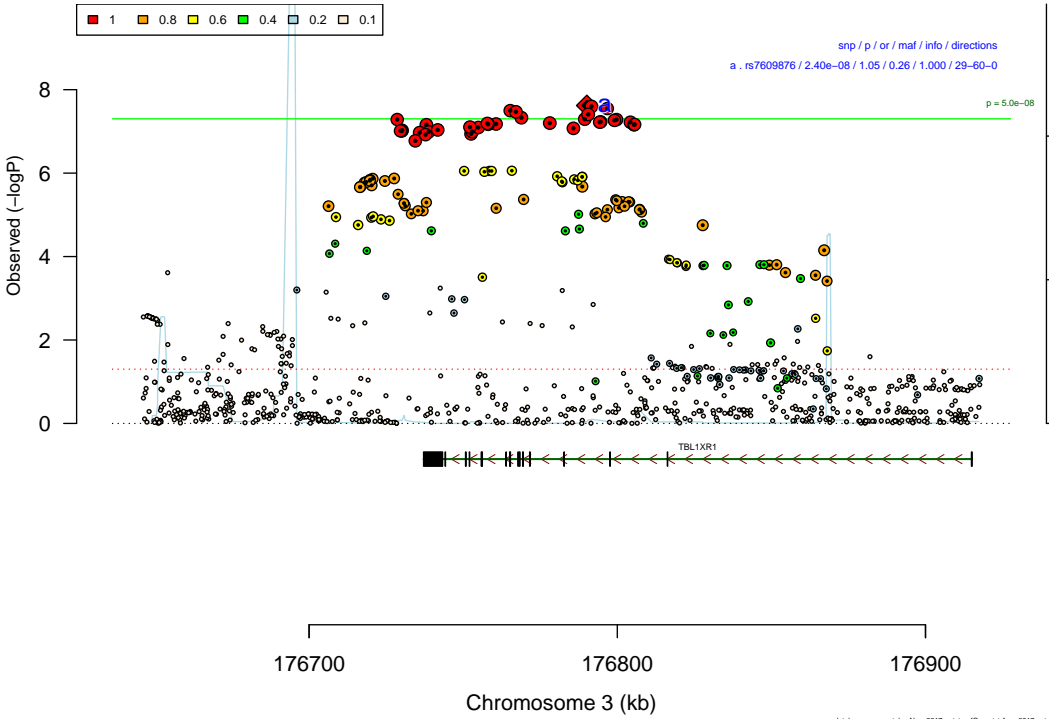

### SCZ\_cond\_rs7609876-chr3

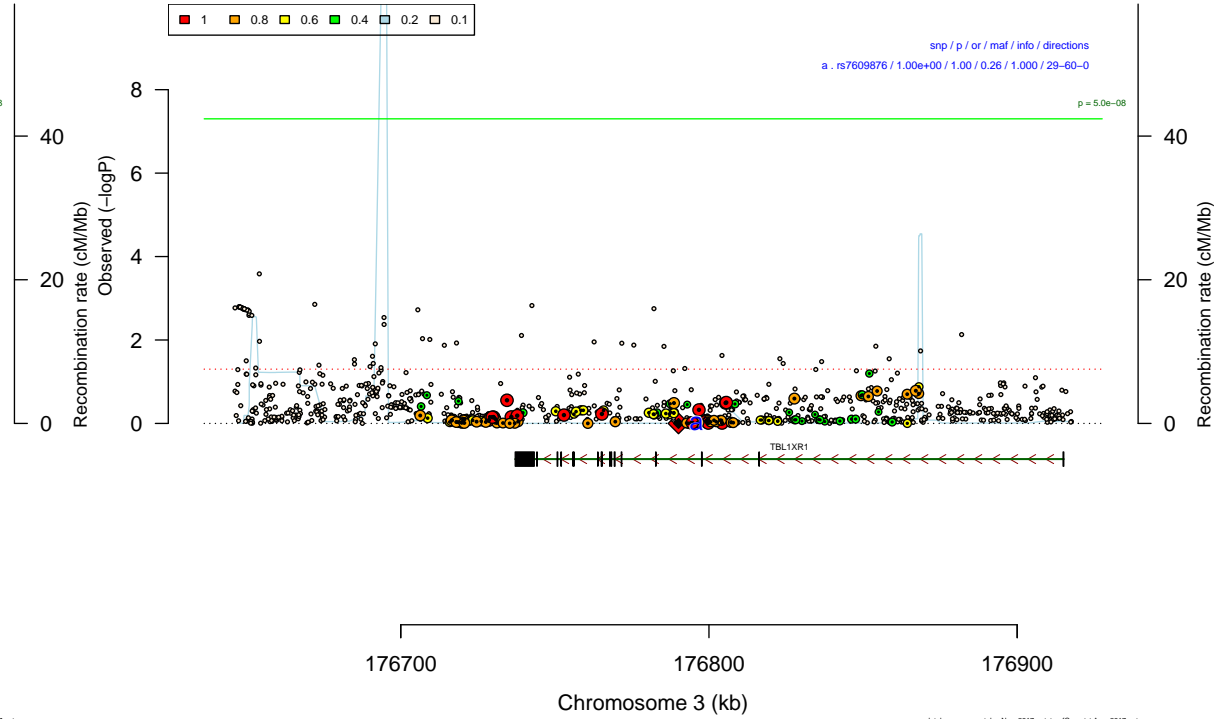

### SCZ\_uncond-rs6925964-chr6

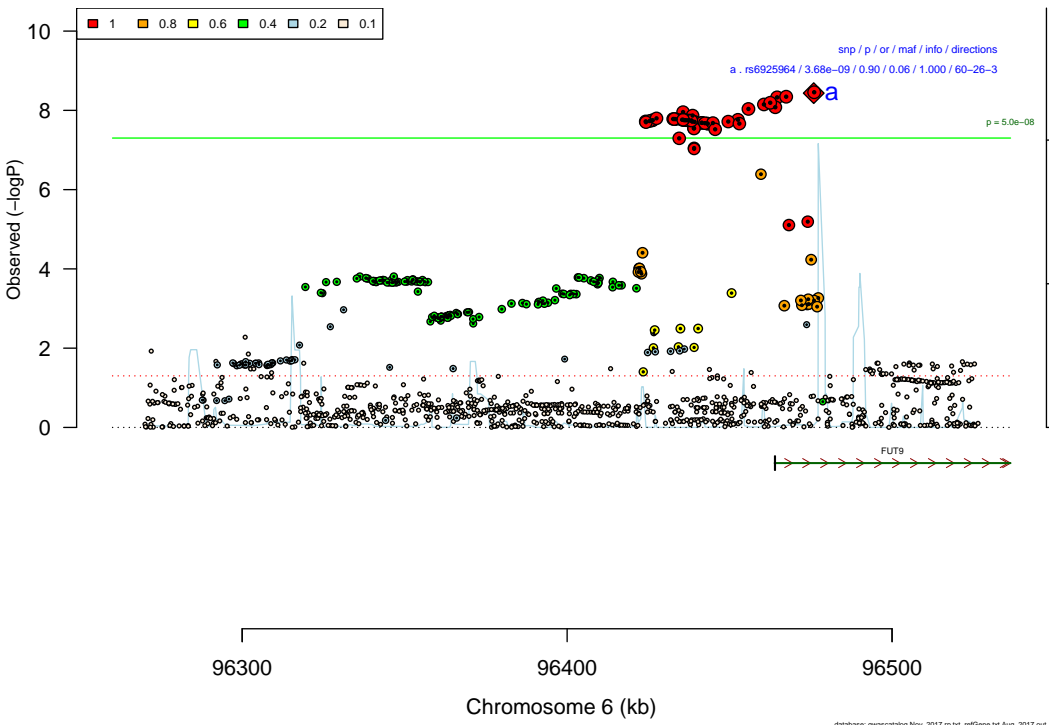

### SCZ\_cond\_rs6925964-chr6

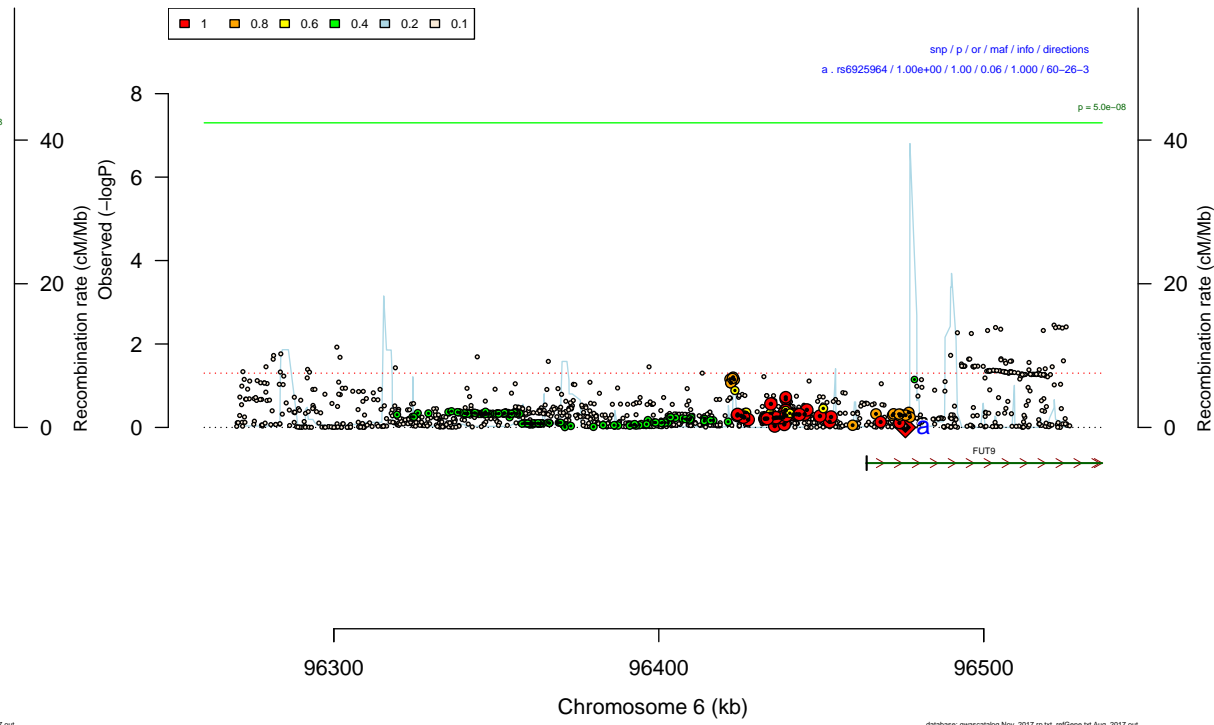

### SCZ\_uncond-rs154433-chr16

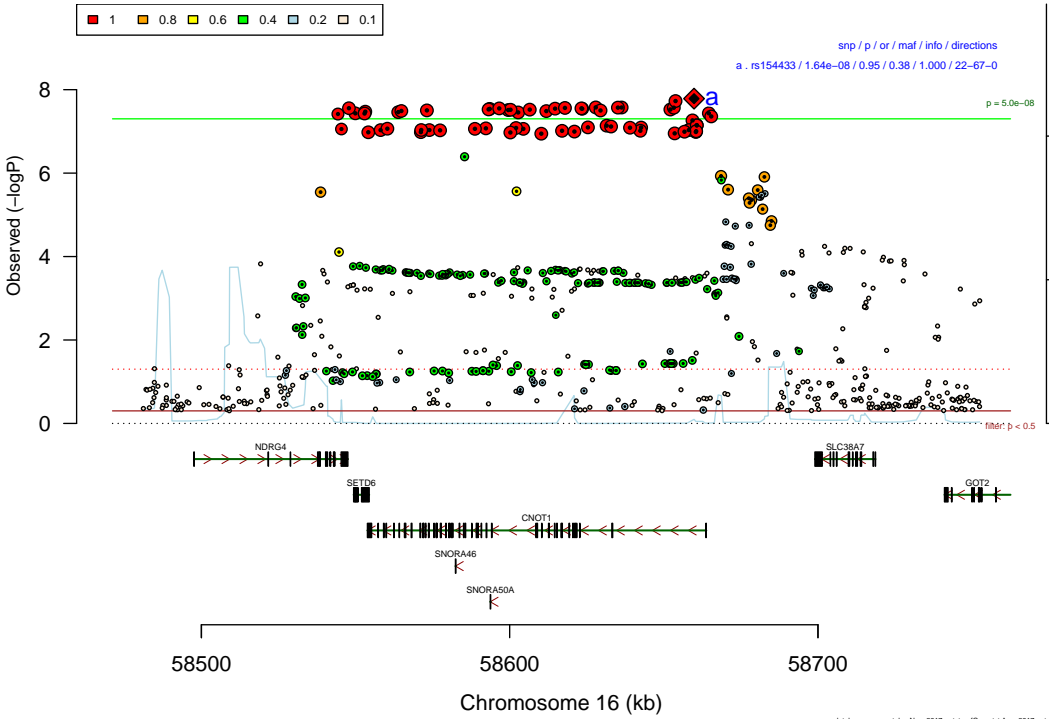

### SCZ\_cond\_rs154433-chr16

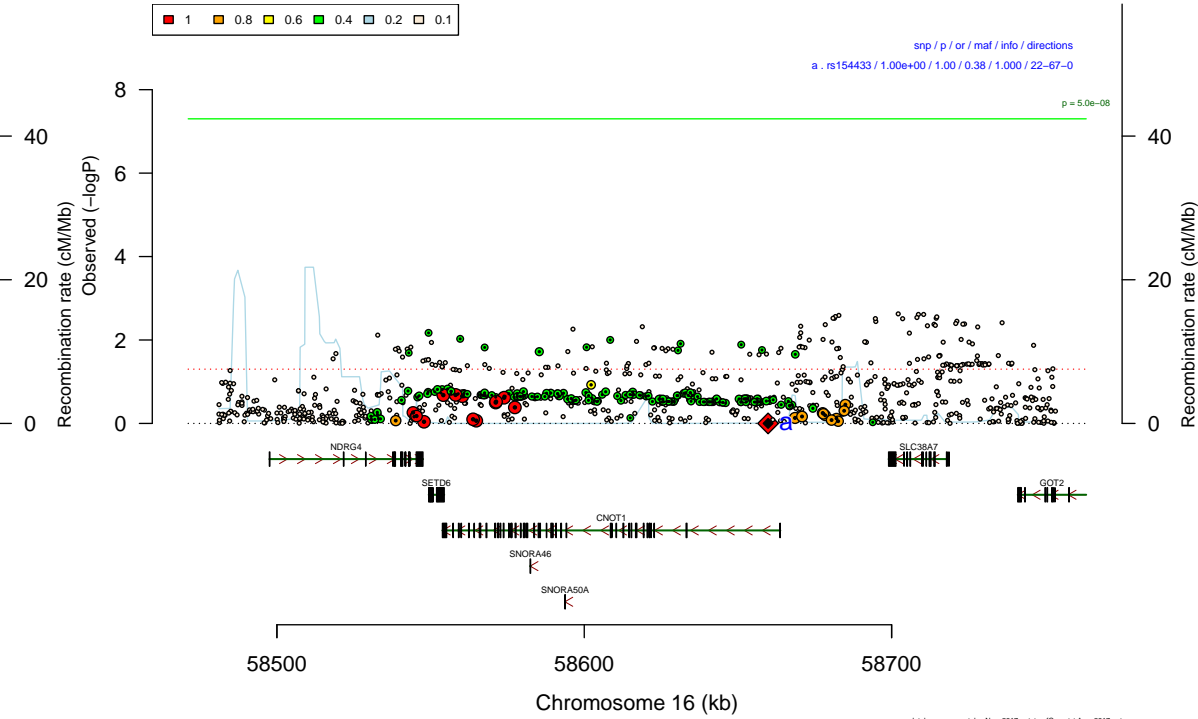

### SCZ\_uncond-rs1506297-chr3

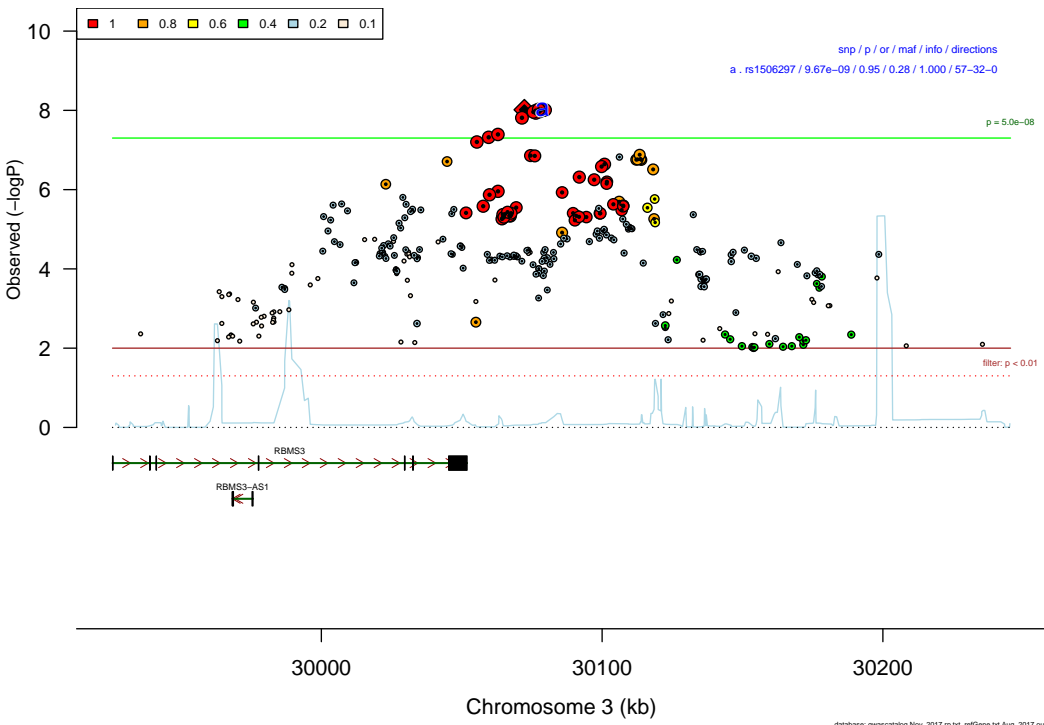

### SCZ\_cond\_rs1506297-chr3

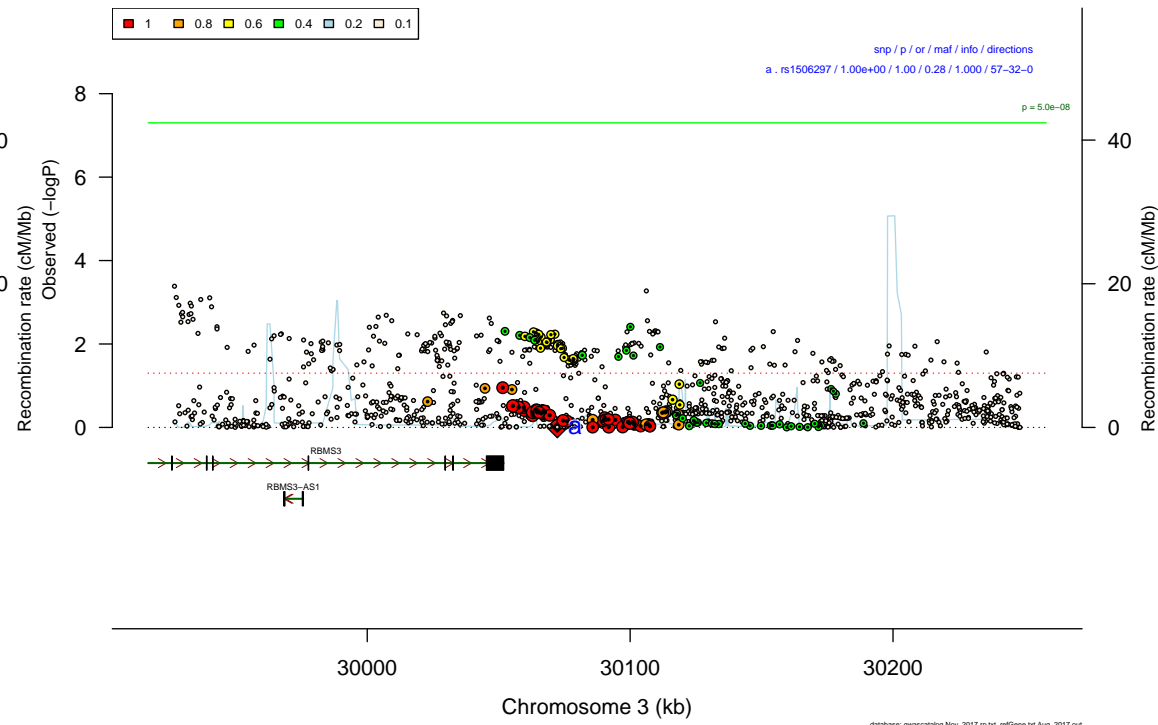

### SCZ\_uncond-rs9891739-chr17

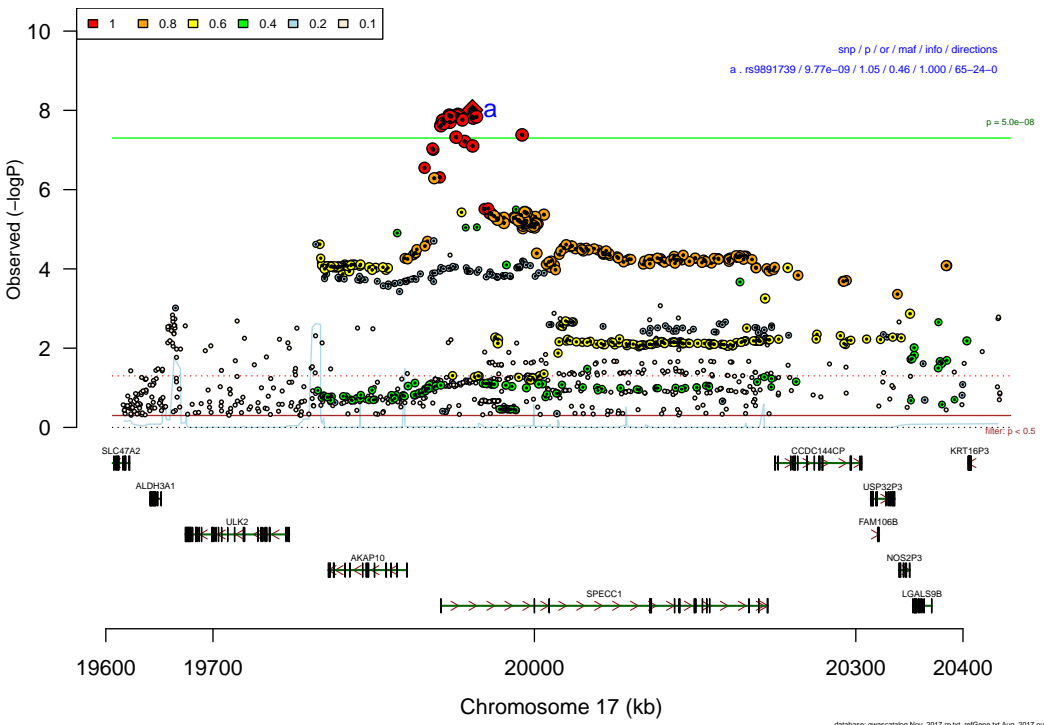

### SCZ\_cond\_rs9891739-chr17

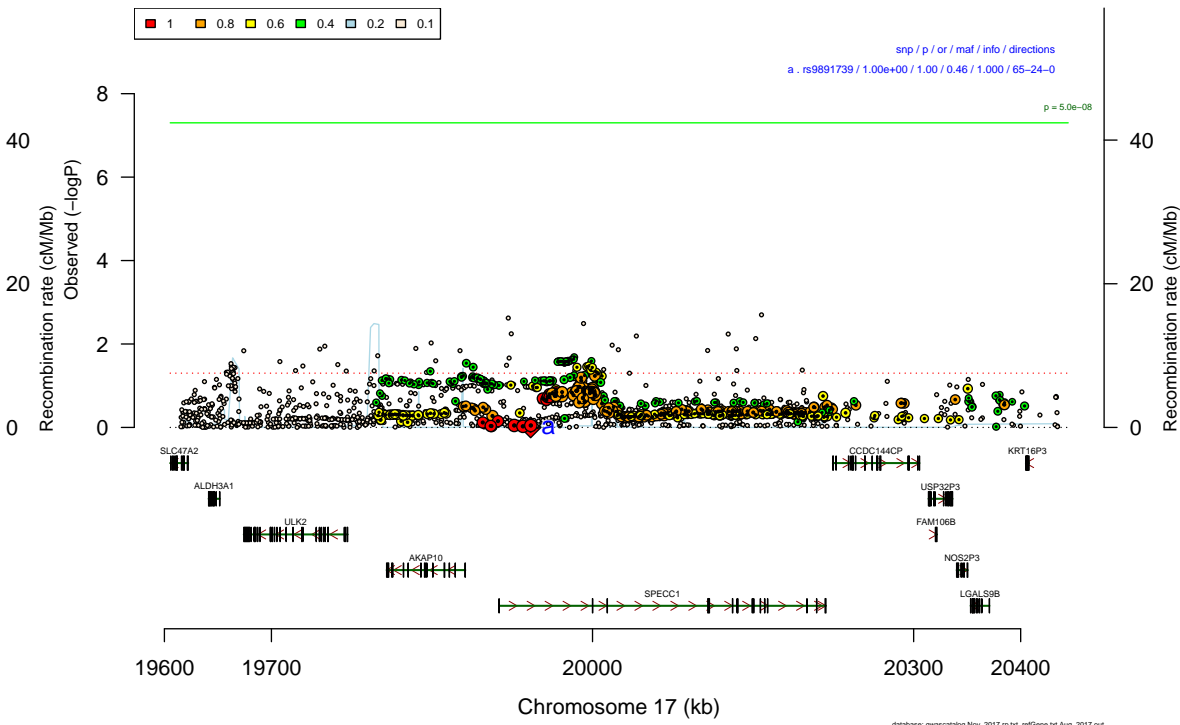

### SCZ\_uncond-rs7915131-chr10

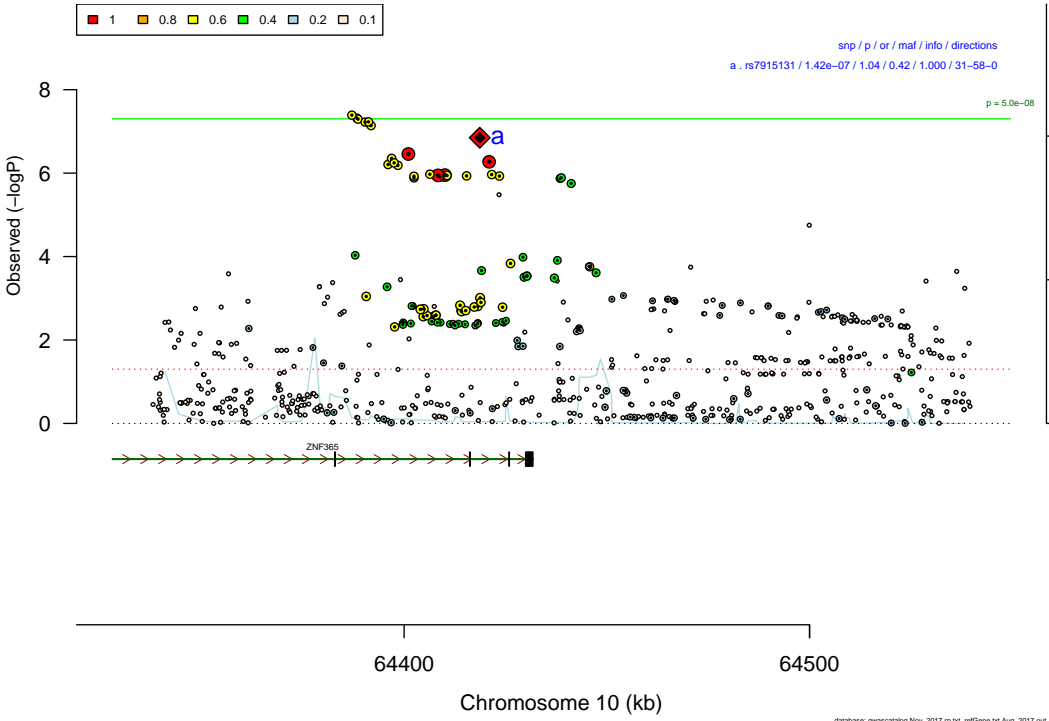

### SCZ\_cond\_rs7915131-chr10

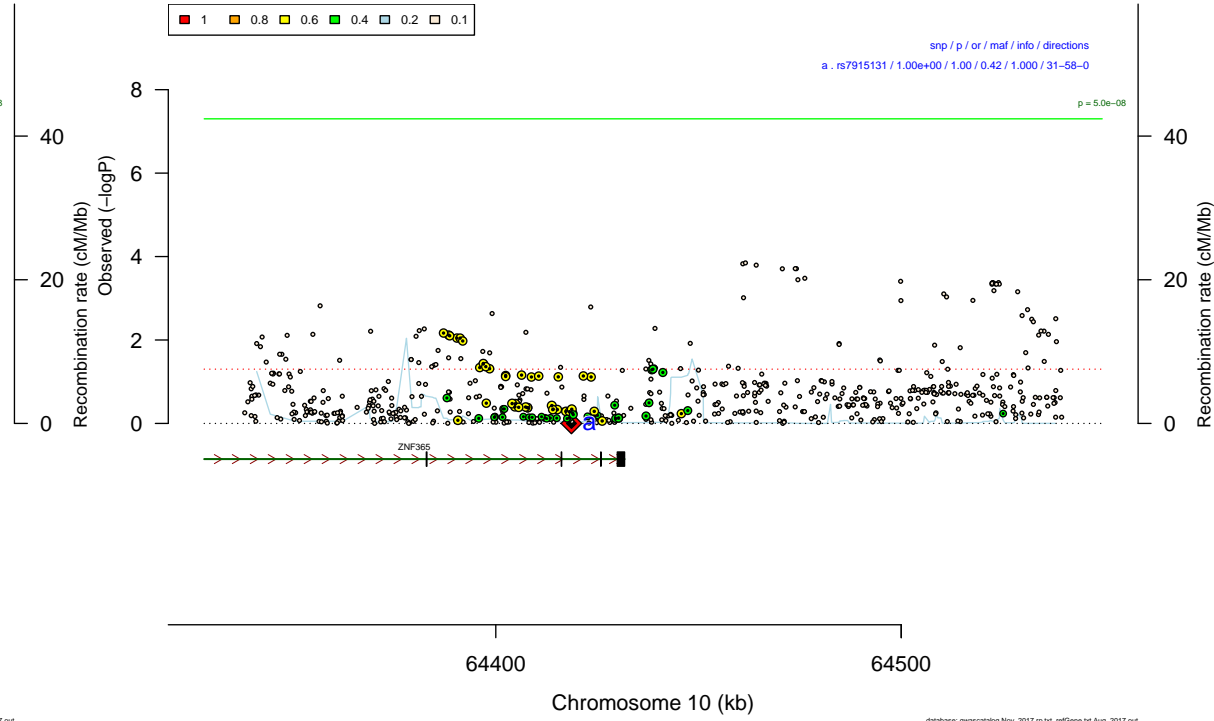



### SCZ\_uncond-rs1122119-chr1

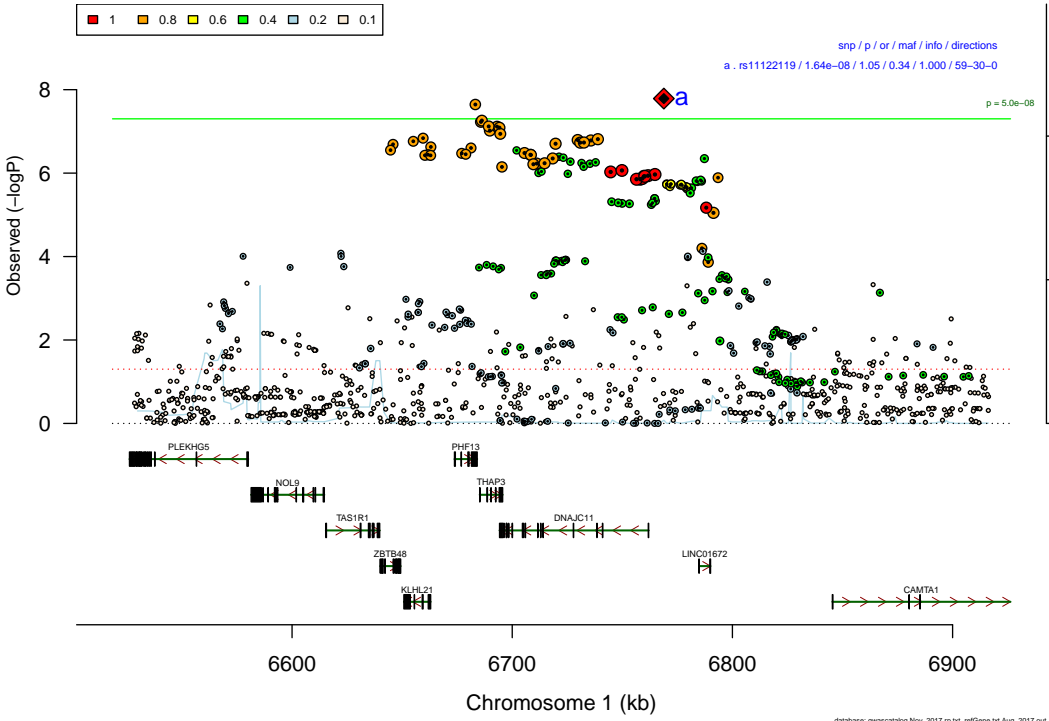

### SCZ\_cond\_rs1122119-chr1

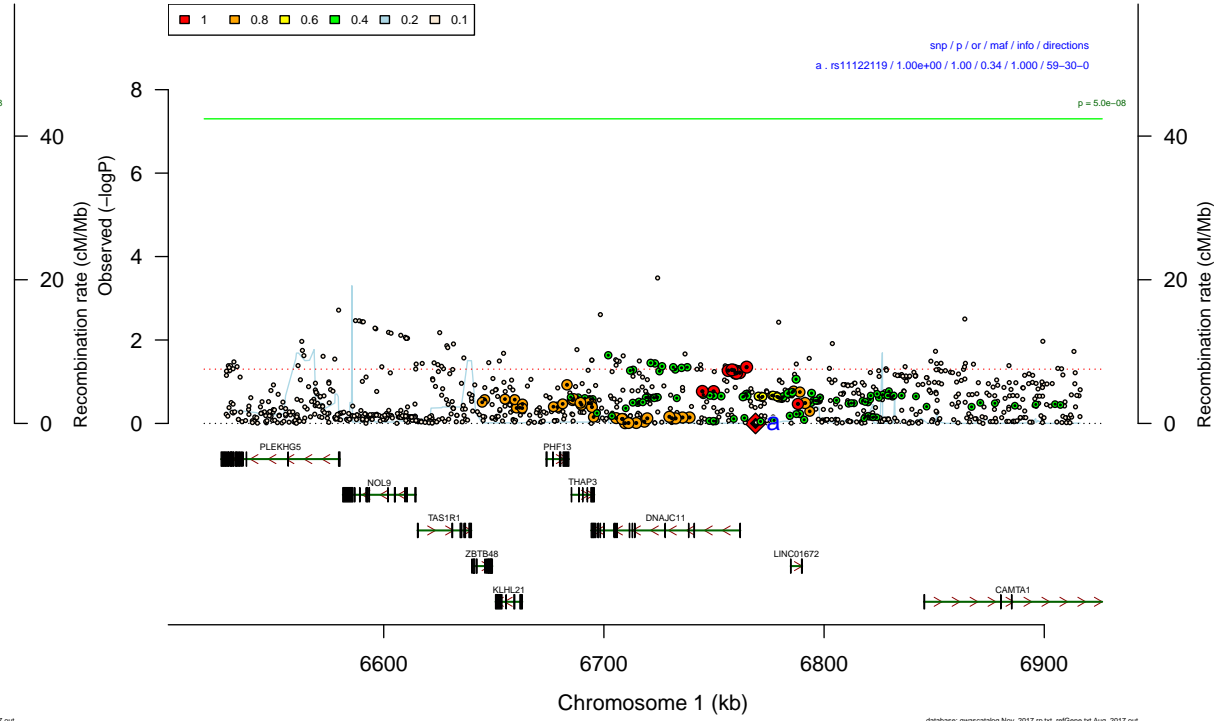

# SCZ\_uncond-rs72761691-chr9

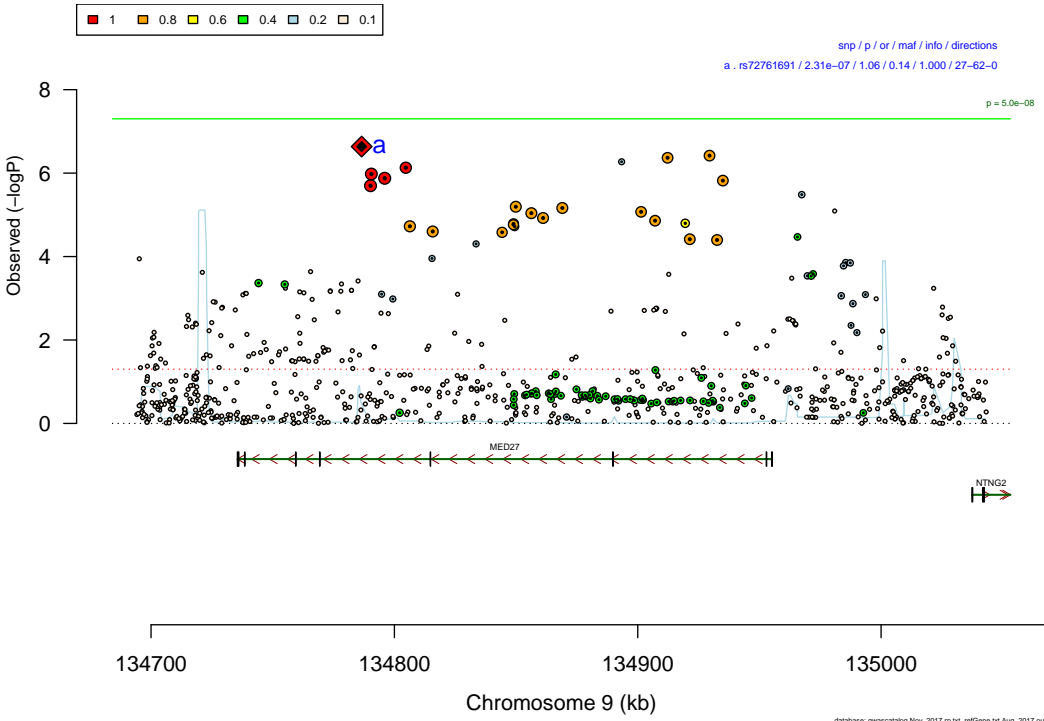

# SCZ\_cond\_rs72761691-chr9

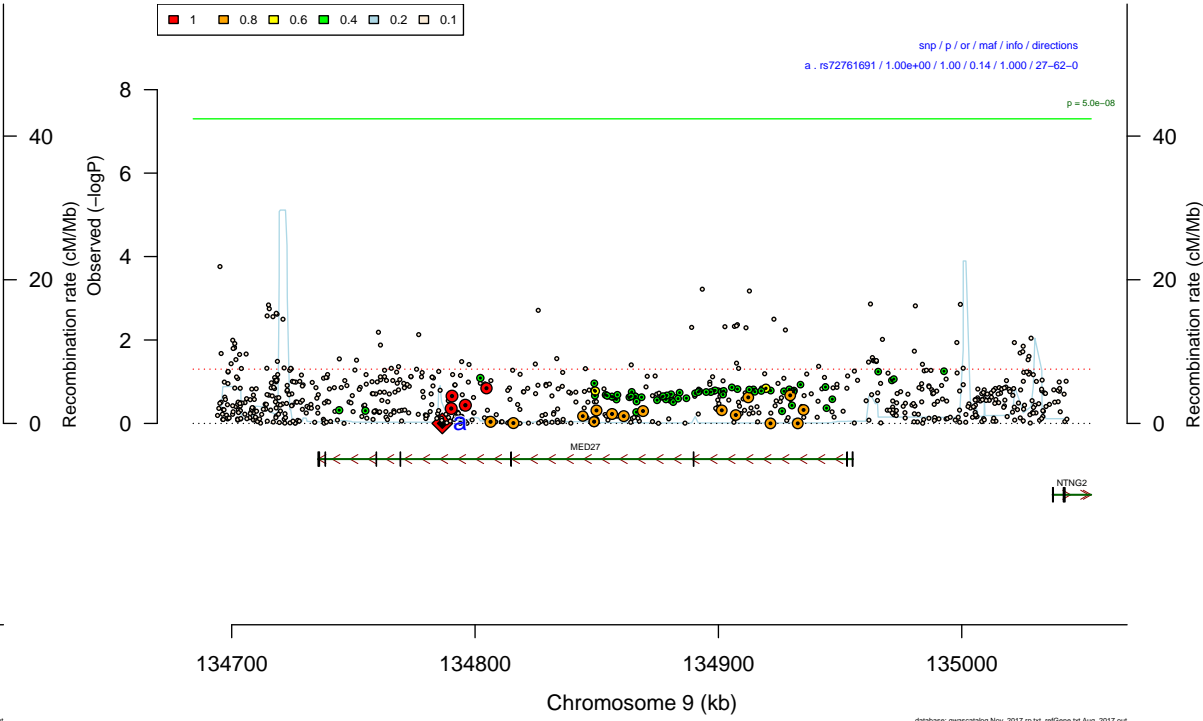

### SCZ\_uncond-rs1510136-chr4

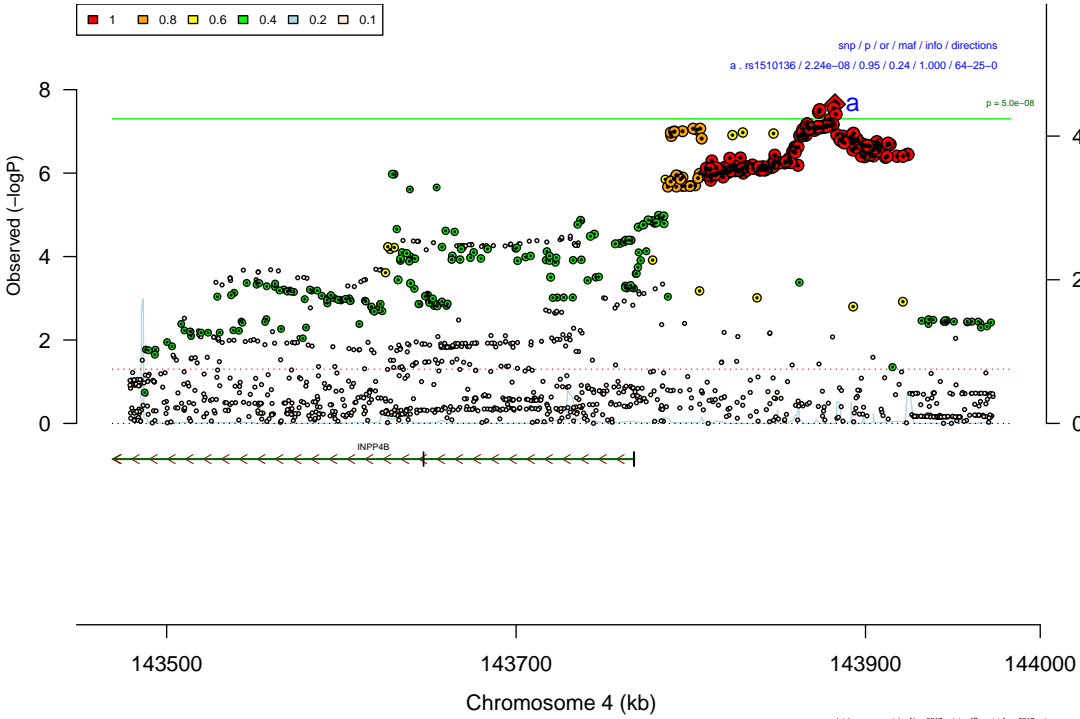

### SCZ\_cond\_rs1510136-chr4

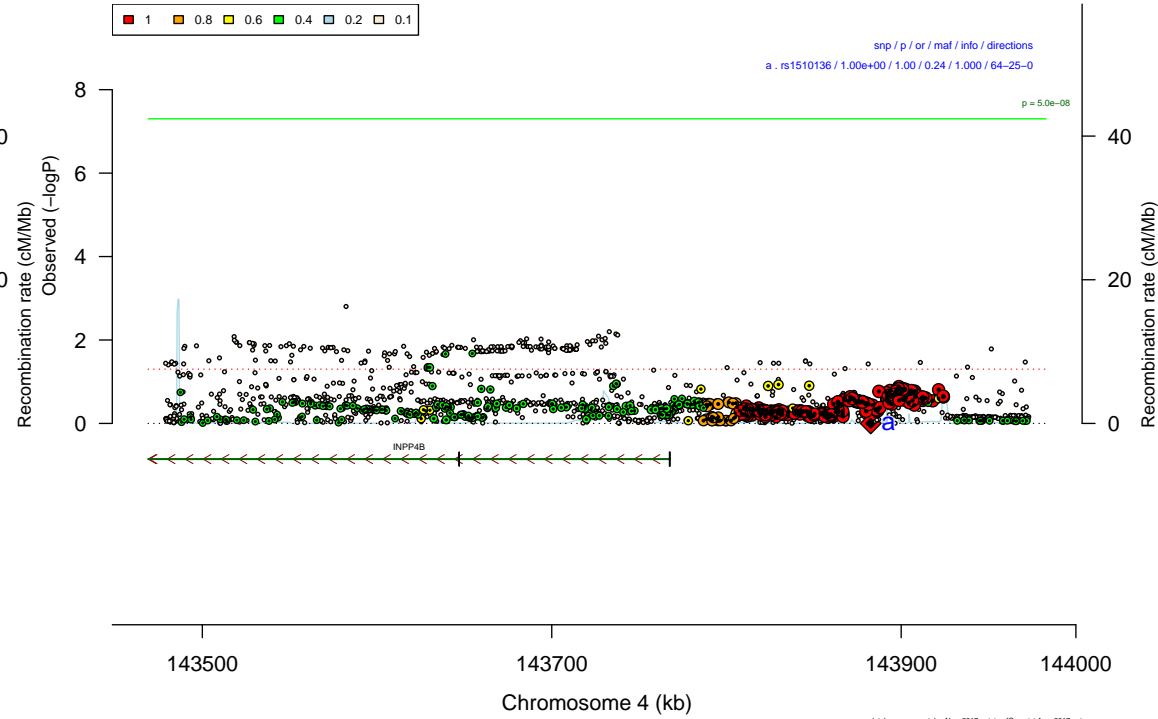

### SCZ\_uncond-rs13032111-chr2

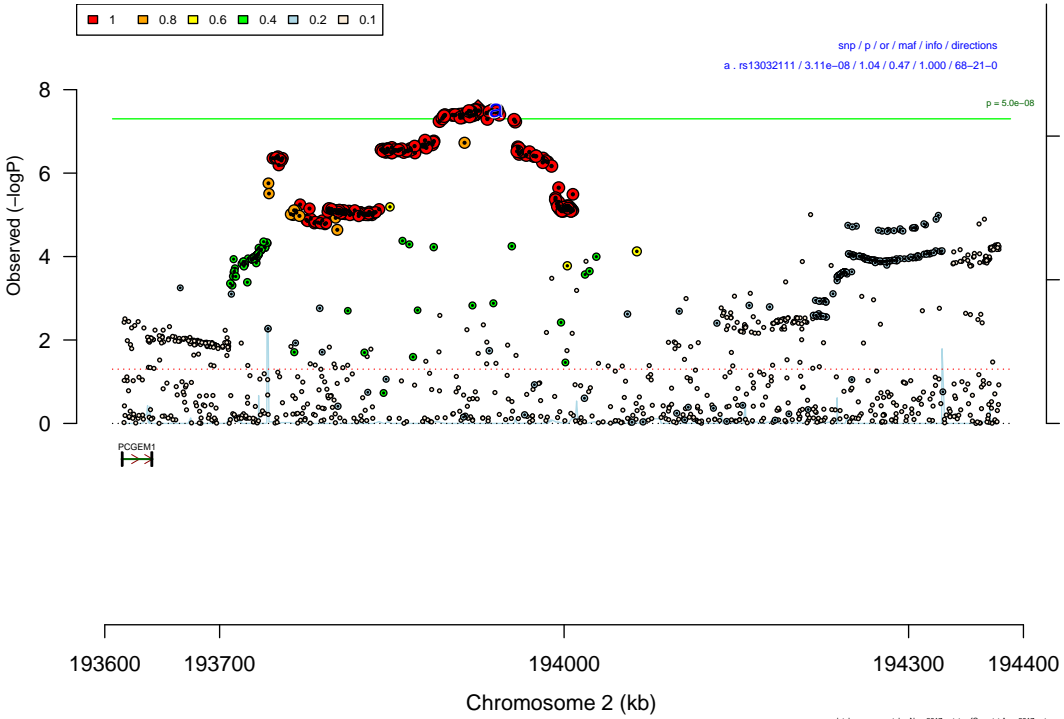

### SCZ\_cond\_rs13032111-chr2

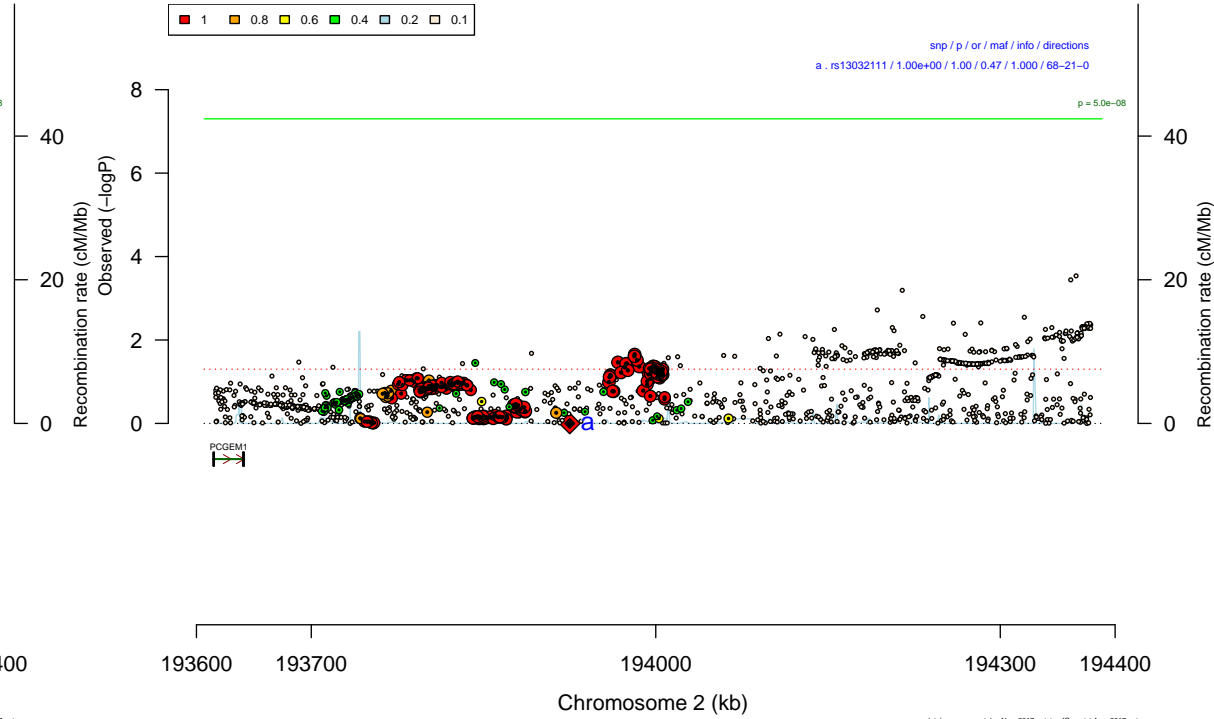

### SCZ\_uncond-rs35026989-chr2

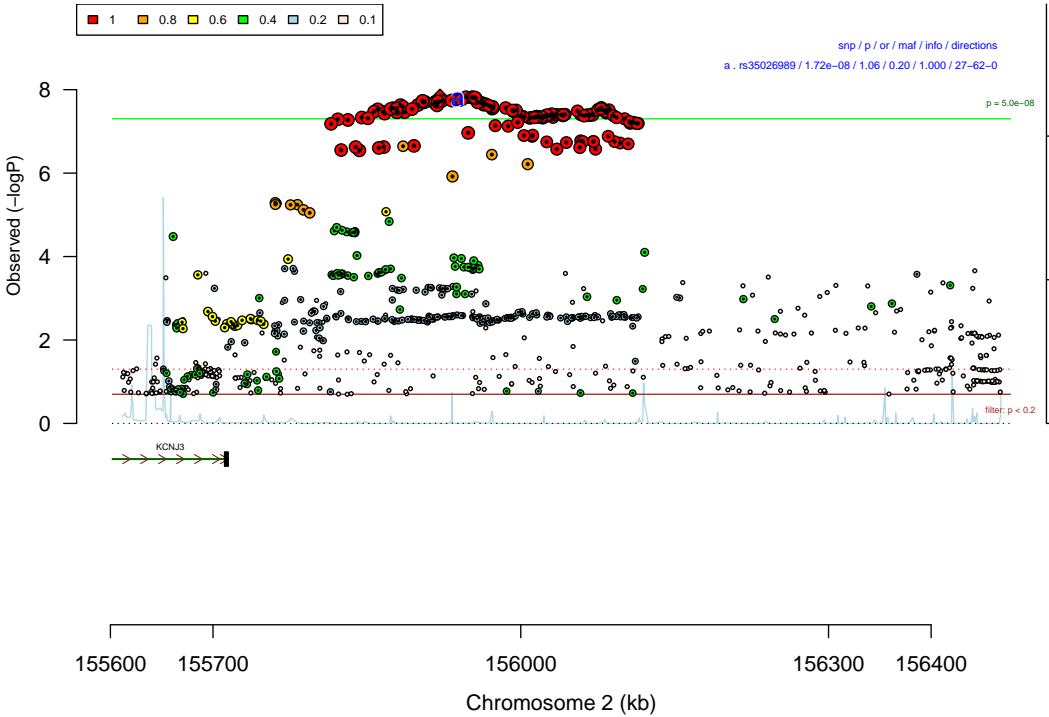

### SCZ\_cond\_rs35026989-chr2

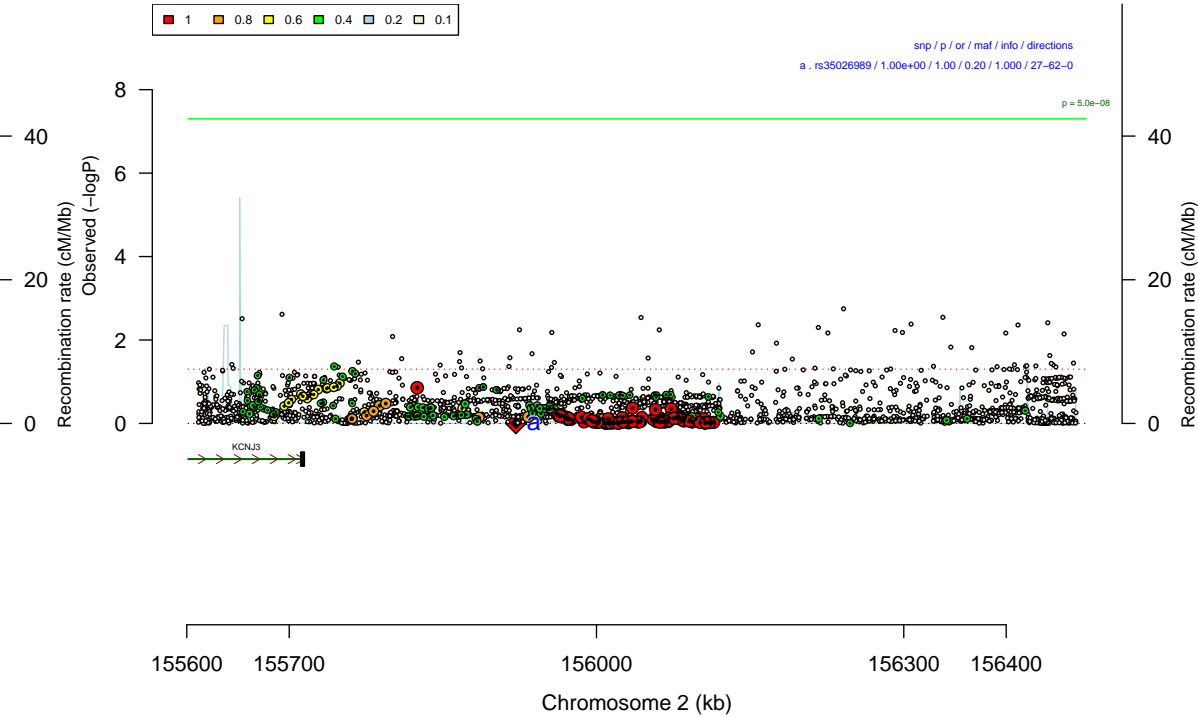

### SCZ\_uncond-rs10238960-chr7

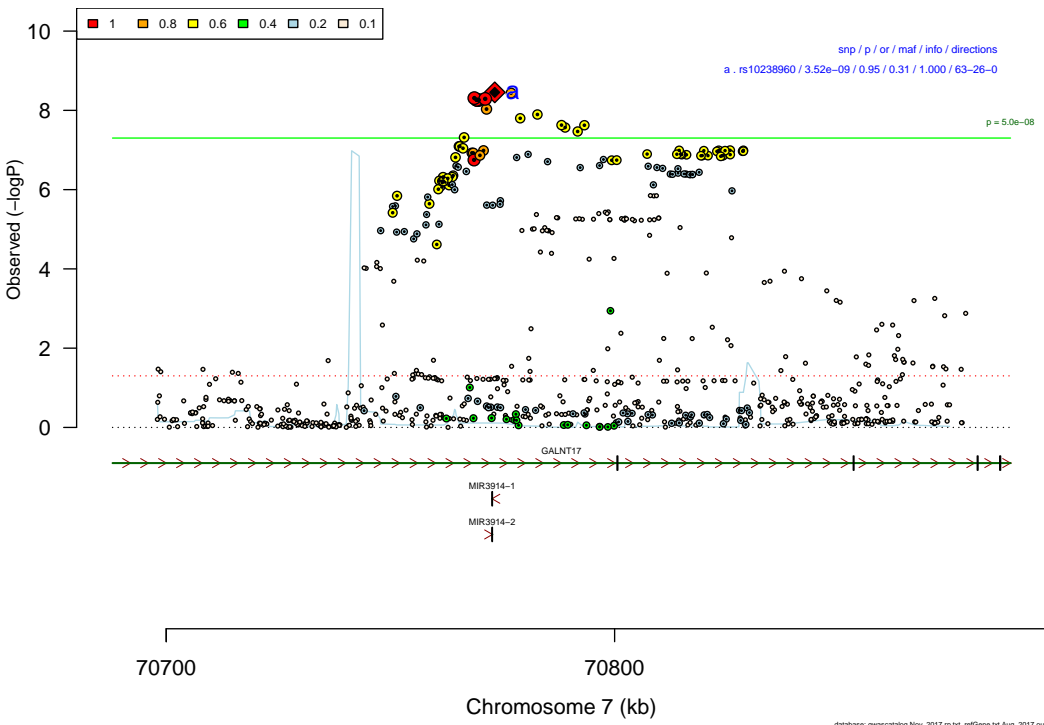

### SCZ\_cond\_rs10238960-chr7

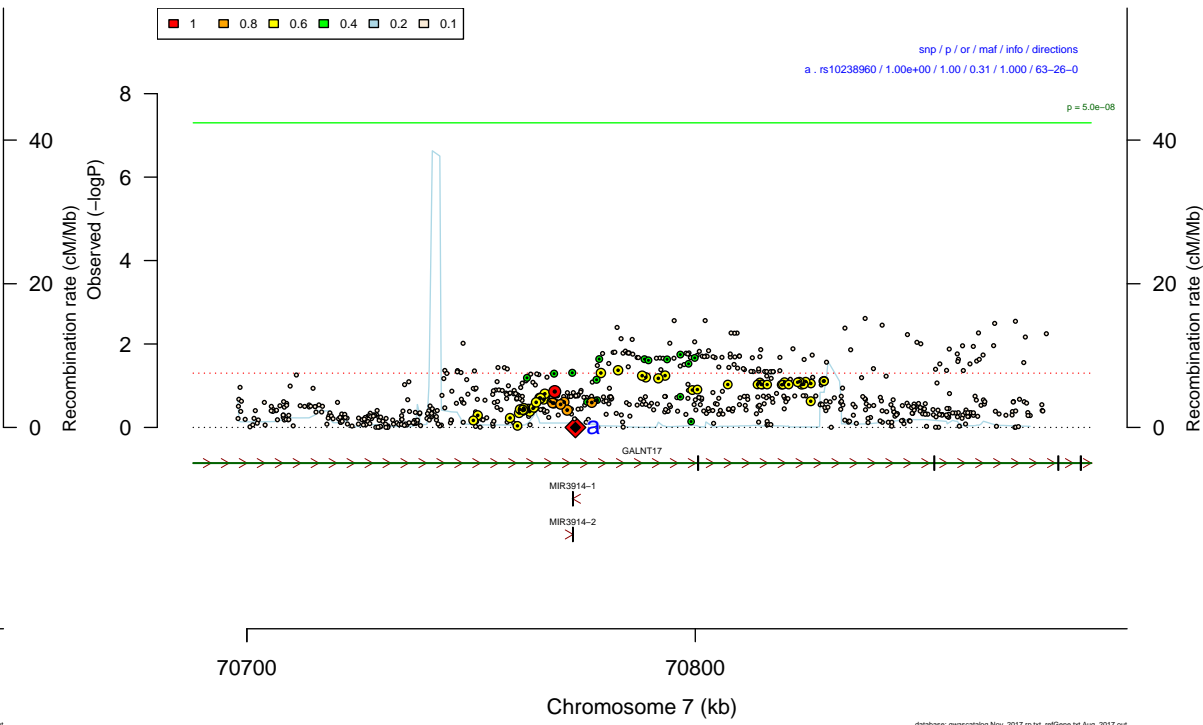

### SCZ\_uncond-rs7953300-chr12

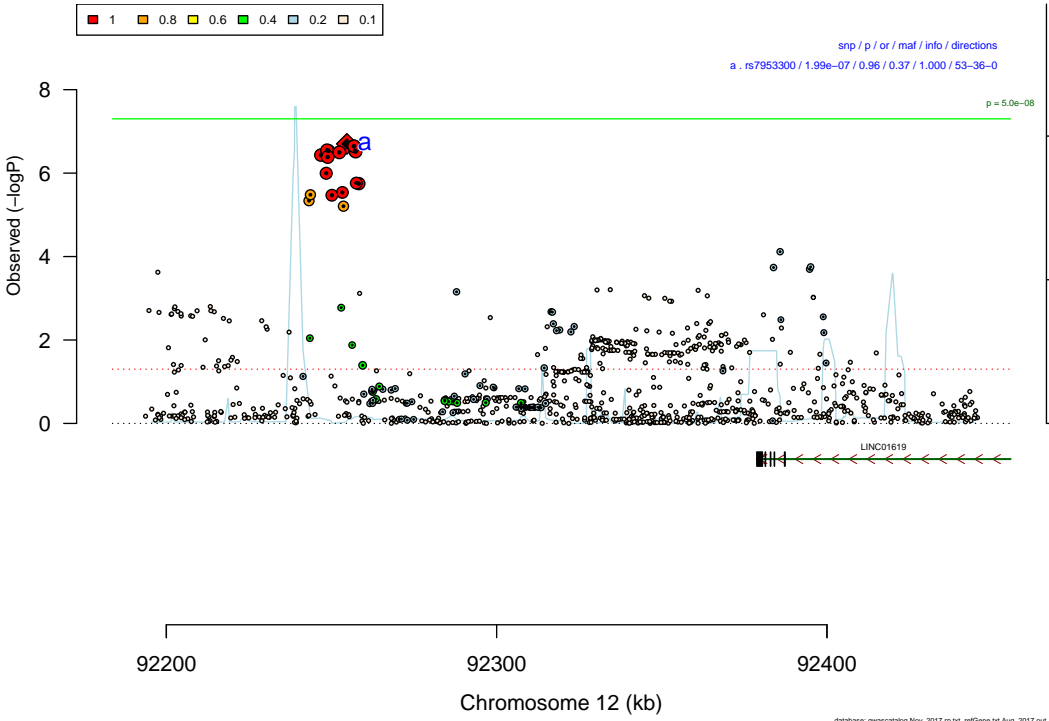

### SCZ\_cond\_rs7953300-chr12

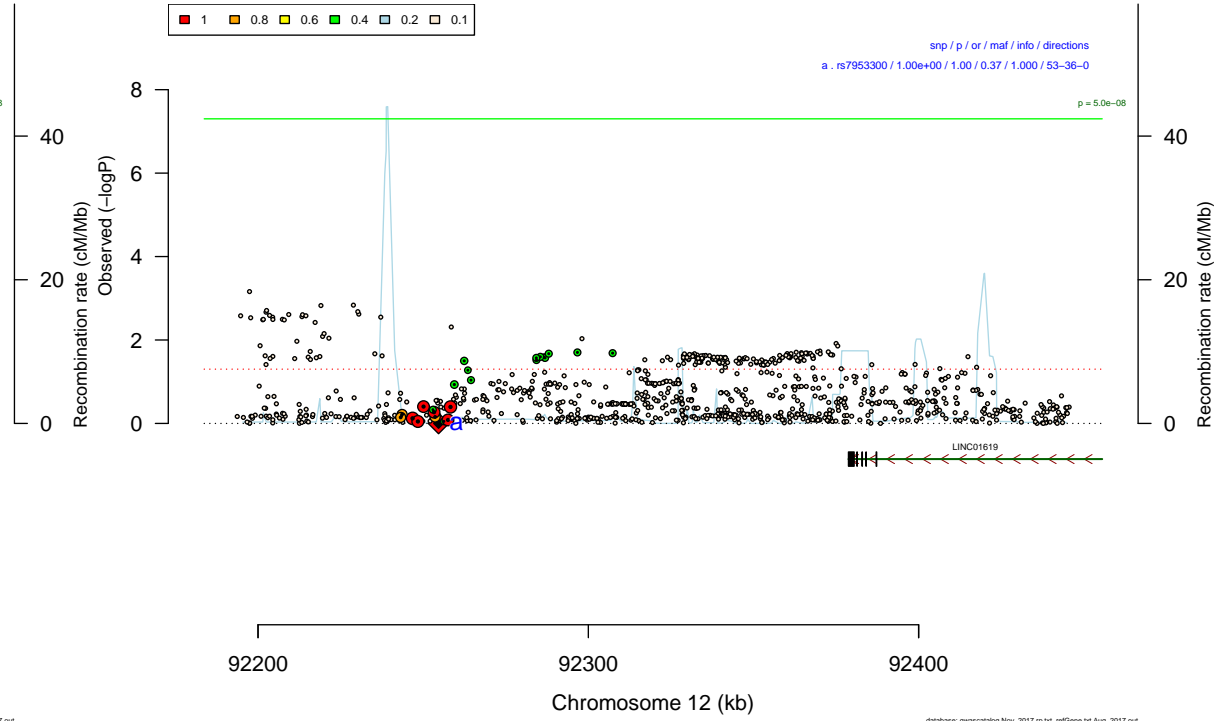

### SCZ\_uncond-rs6919146-chr6

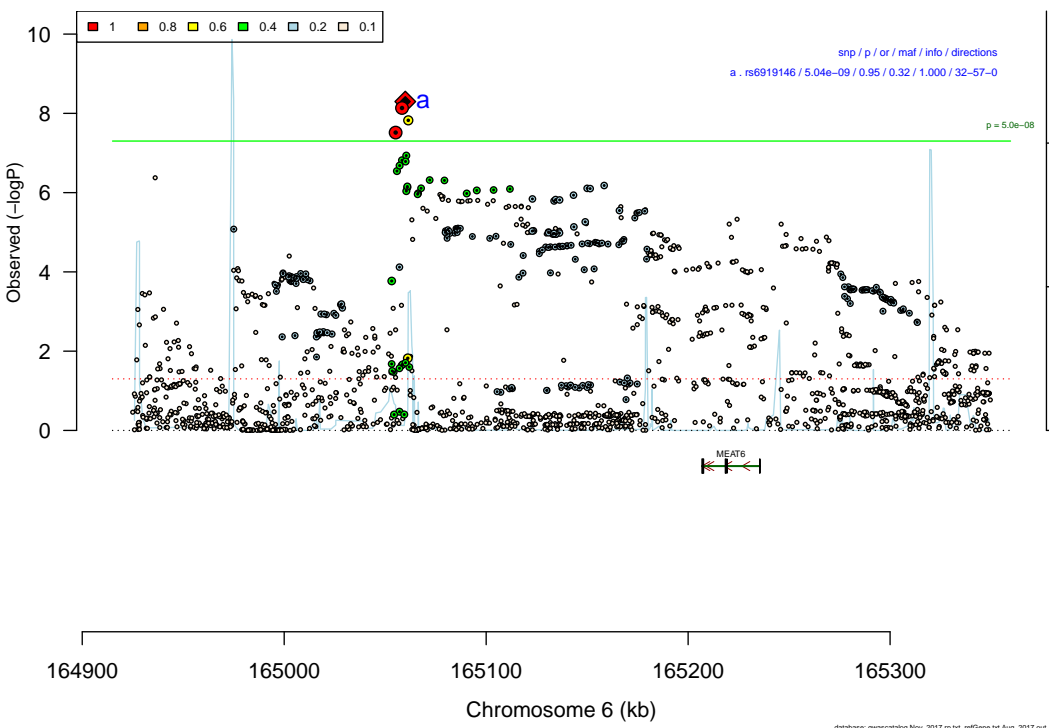

### SCZ\_cond\_rs6919146-chr6

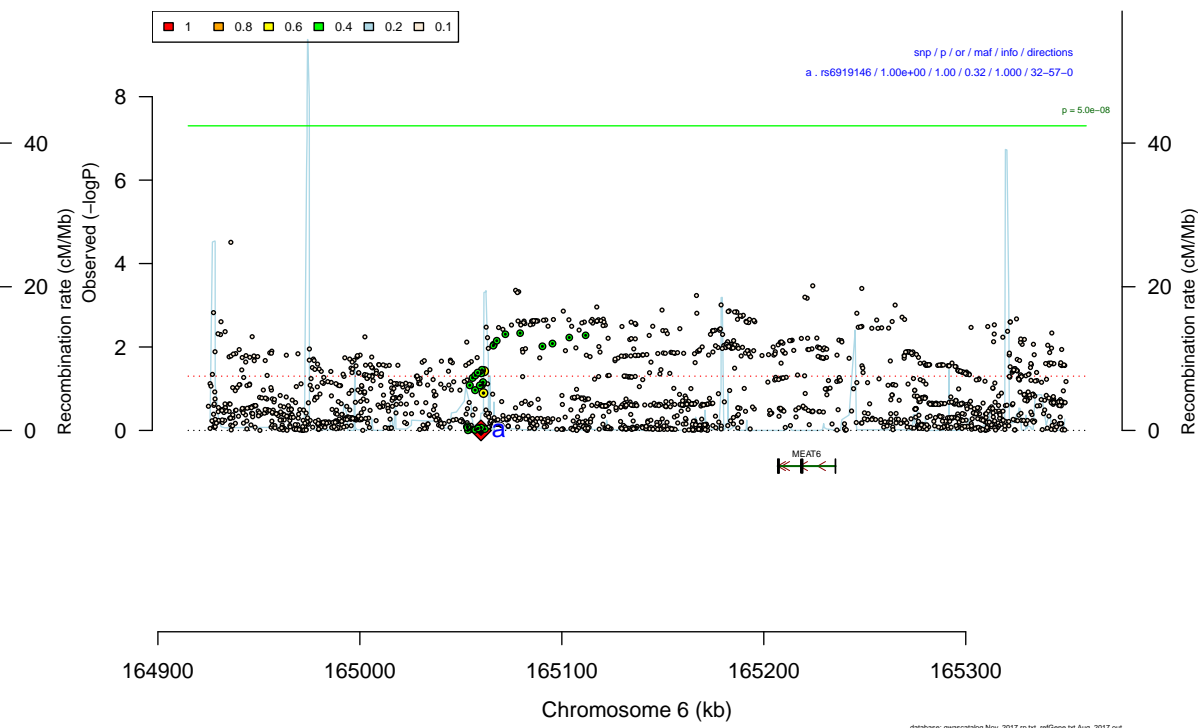



### SCZ\_uncond-rs7133857-chr12

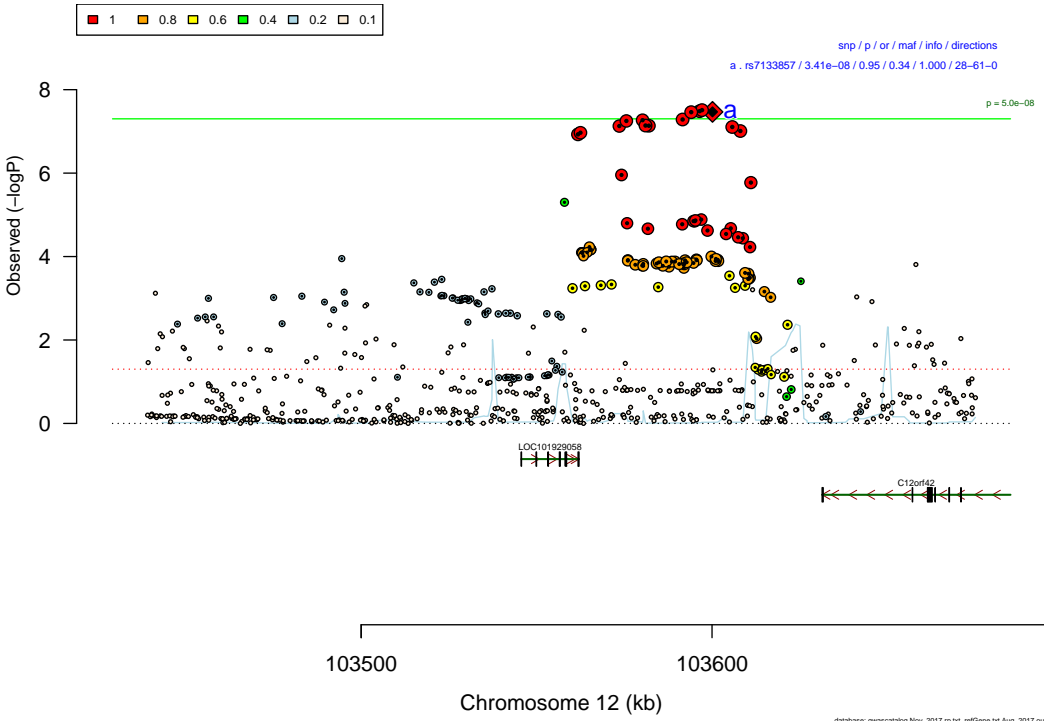

### SCZ\_cond\_rs7133857-chr12

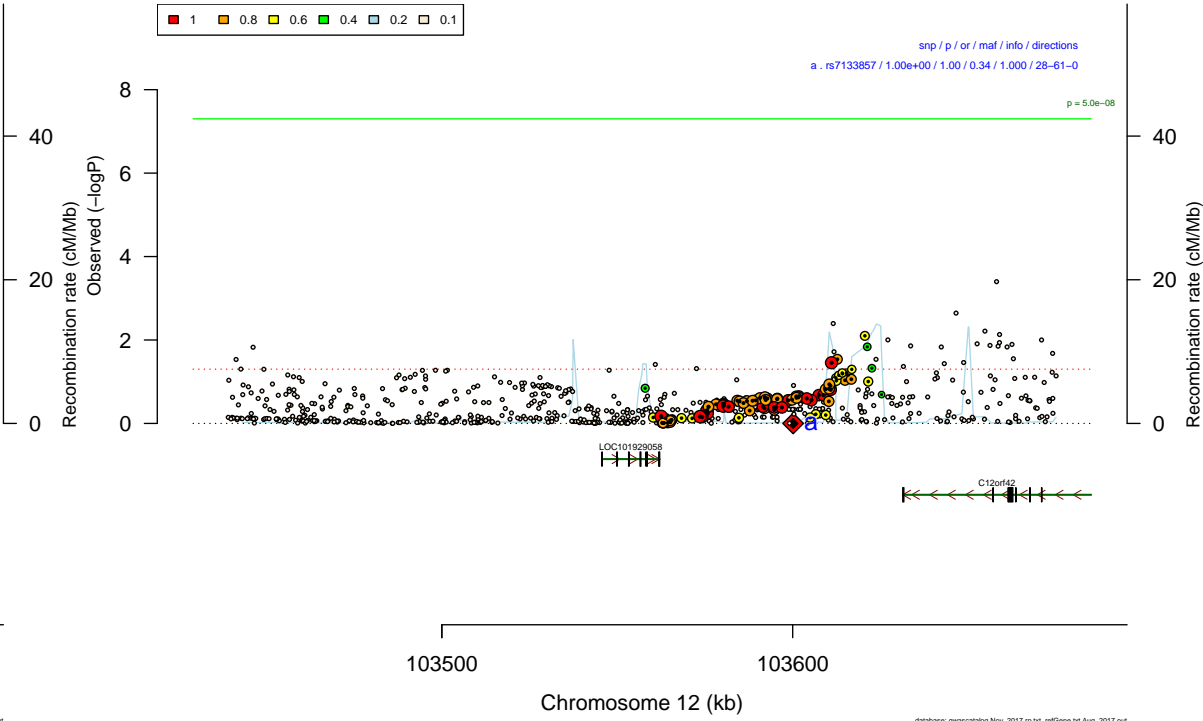

### SCZ\_uncond-rs77463171-chr16

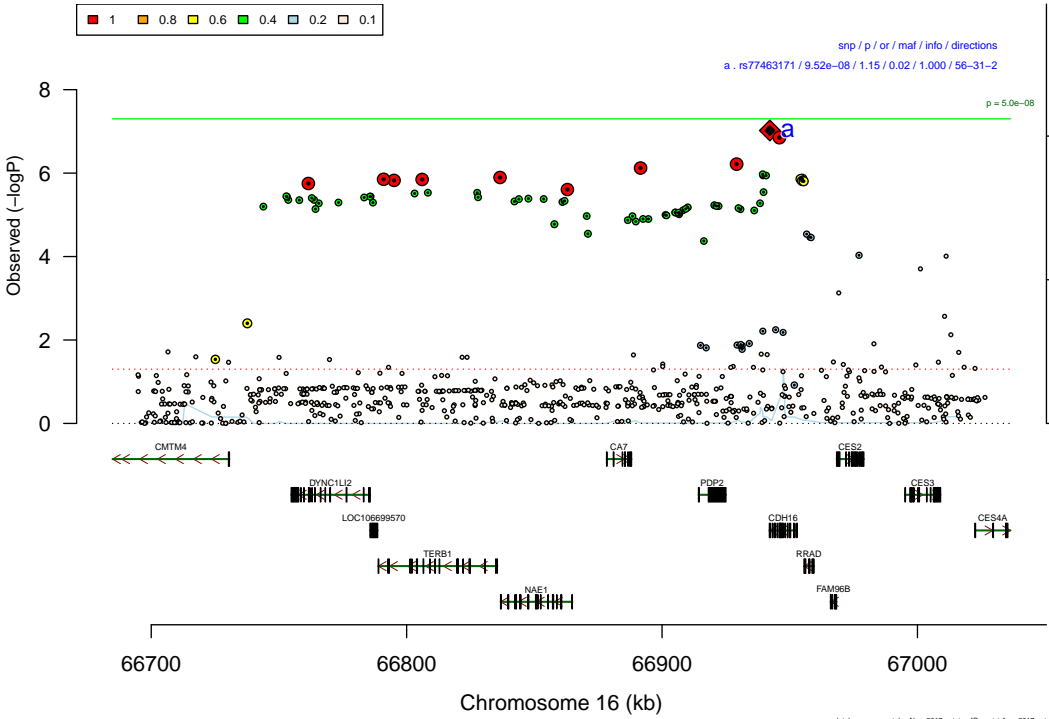

### SCZ\_cond\_rs77463171-chr16

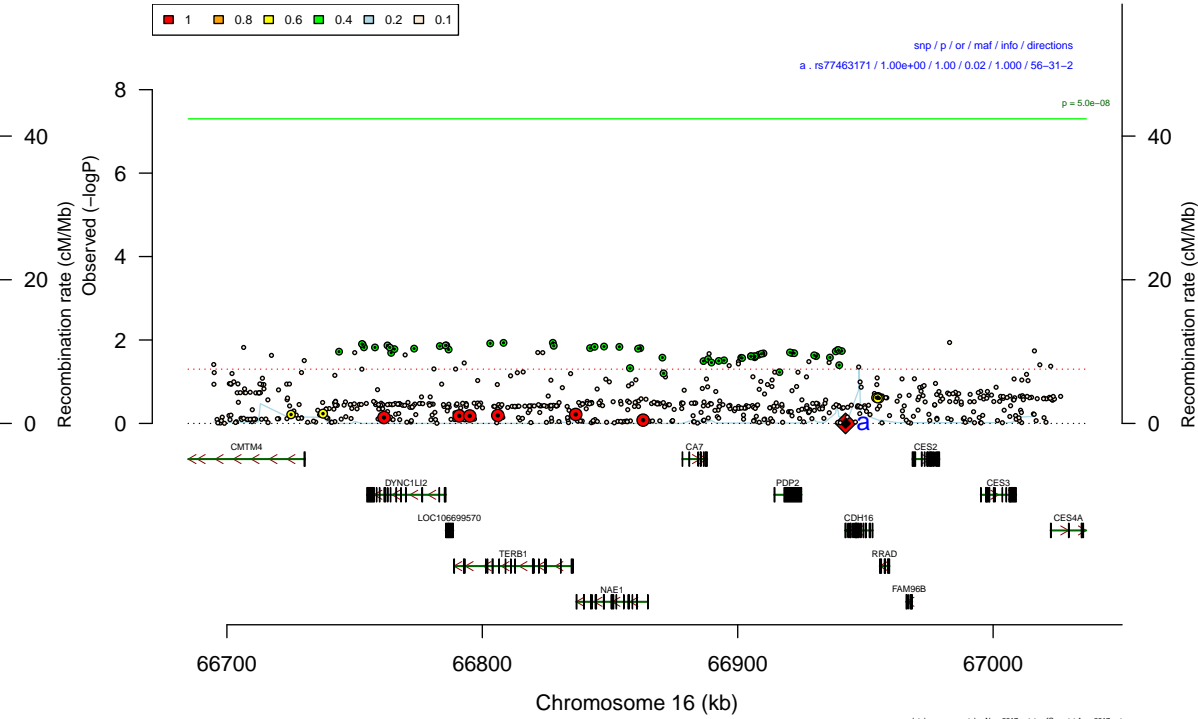

### SCZ\_uncond-rs72943392-chr11

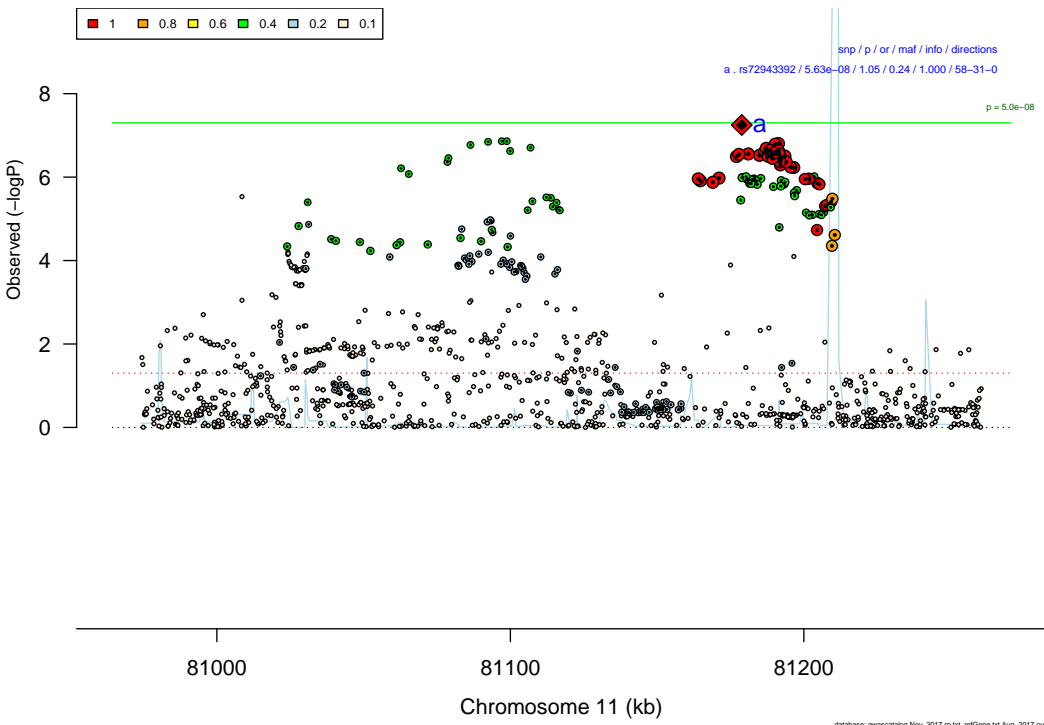

### SCZ\_cond\_rs72943392-chr11

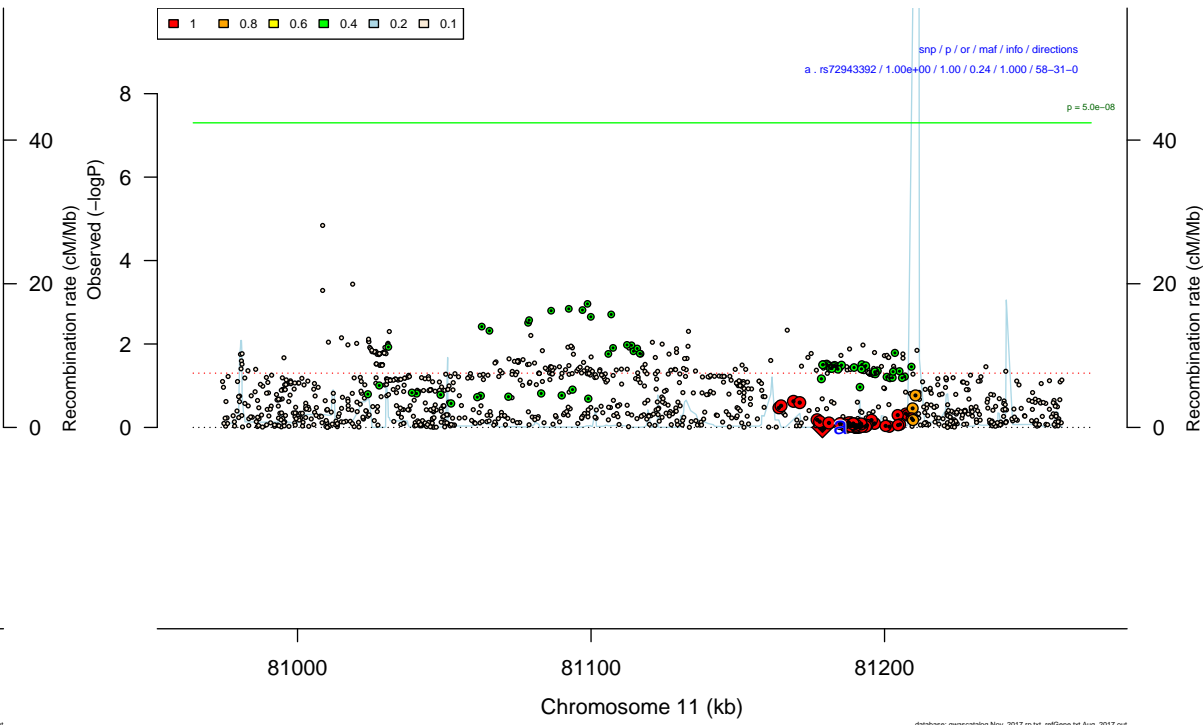

### SCZ\_uncond-rs12311848-chr12

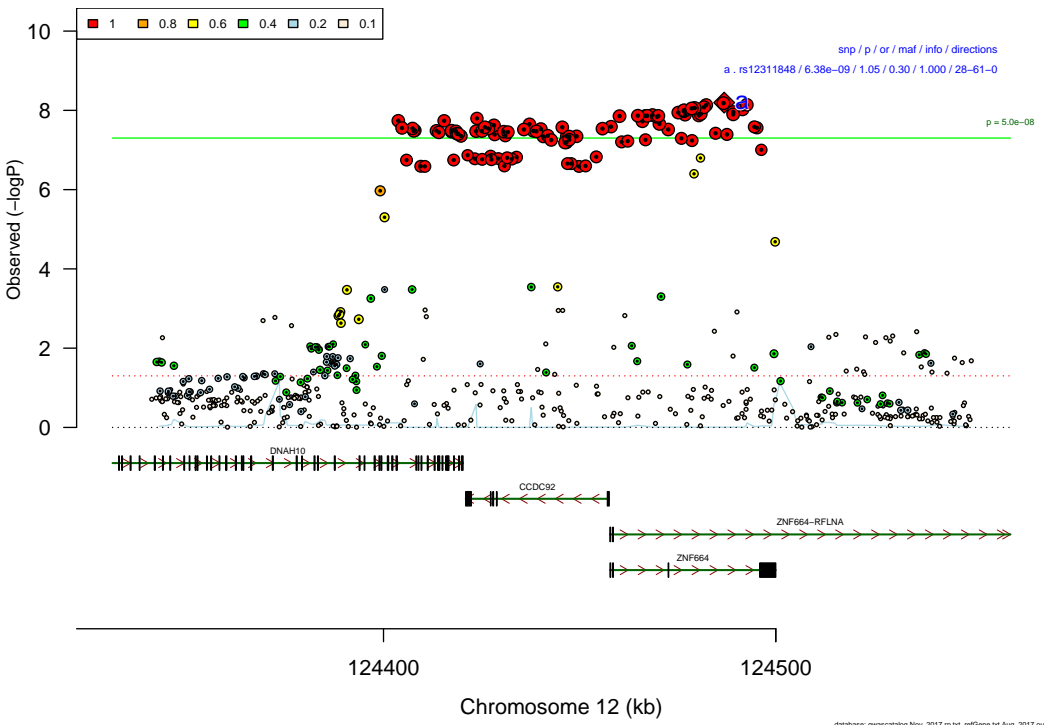

### SCZ\_cond\_rs12311848-chr12

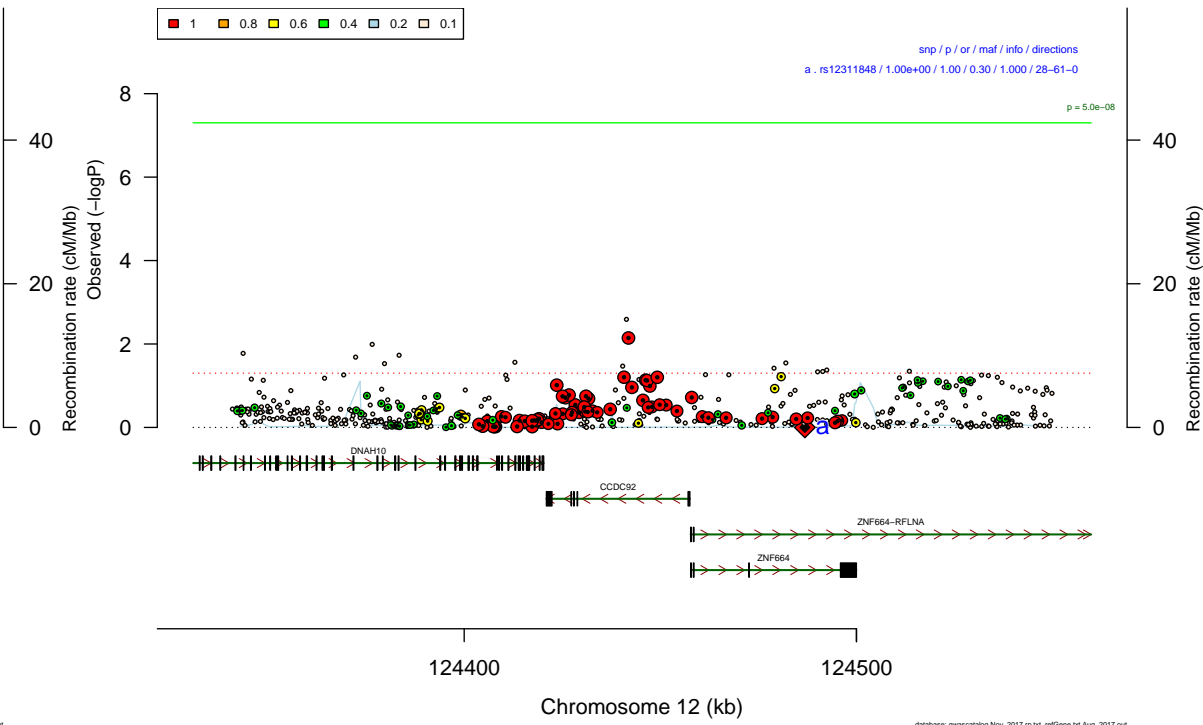

### SCZ\_uncond-rs12713008-chr2

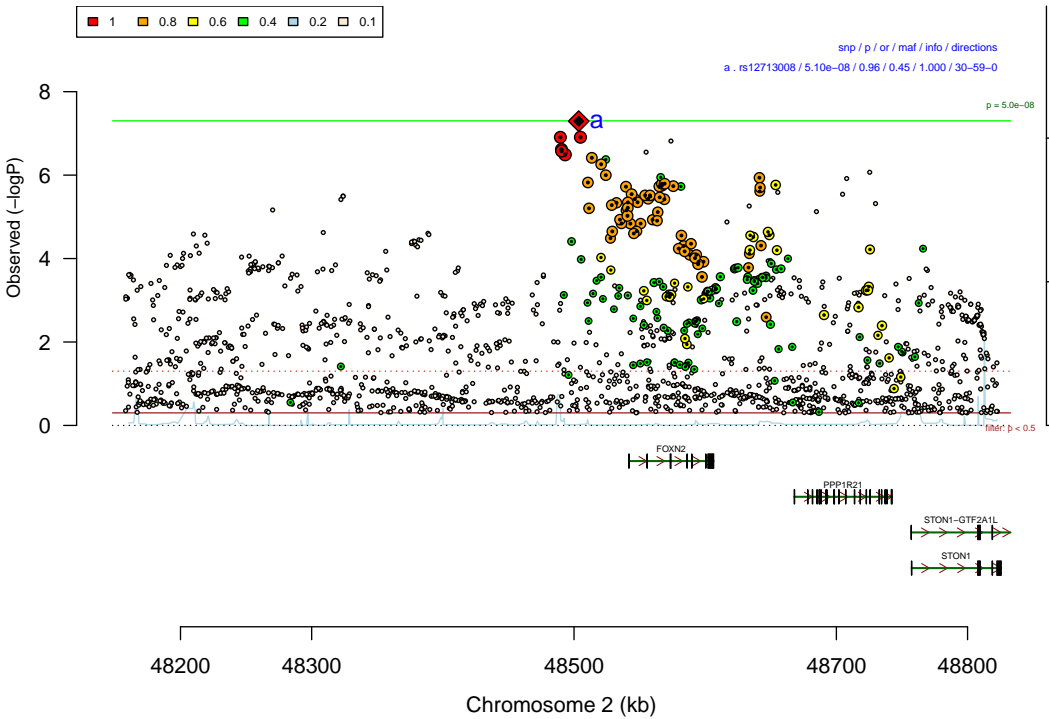

### SCZ\_cond\_rs12713008-chr2

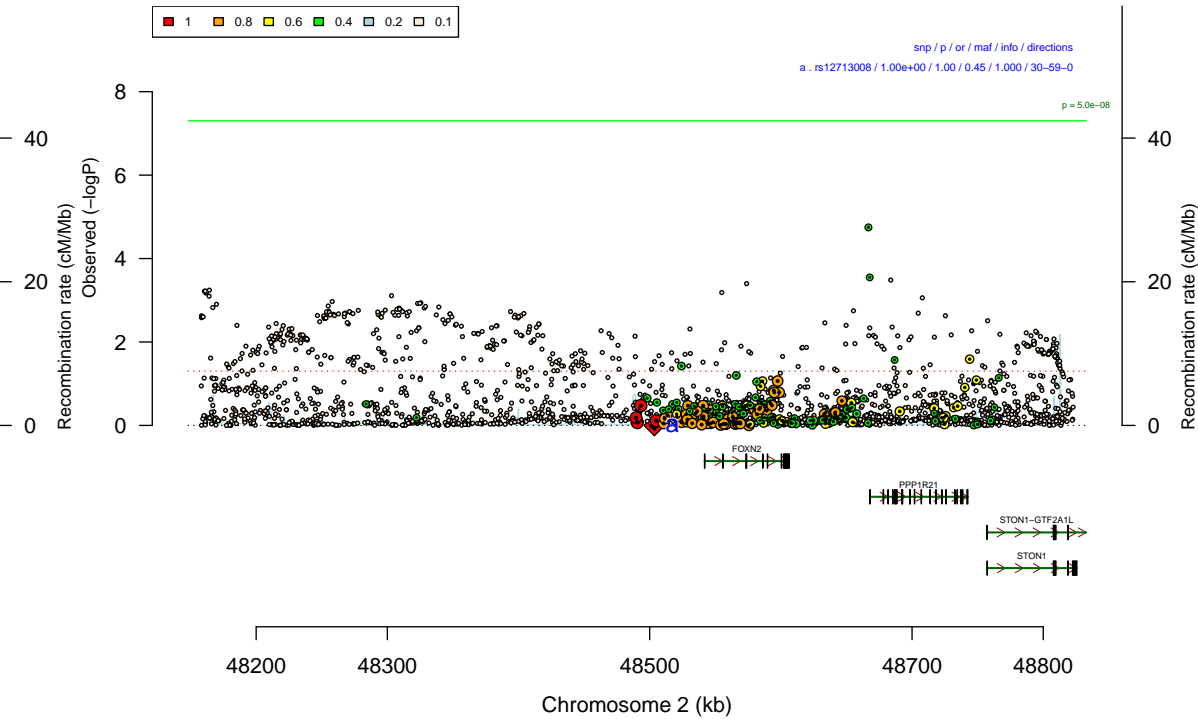

### SCZ\_uncond-rs9454727-chr6

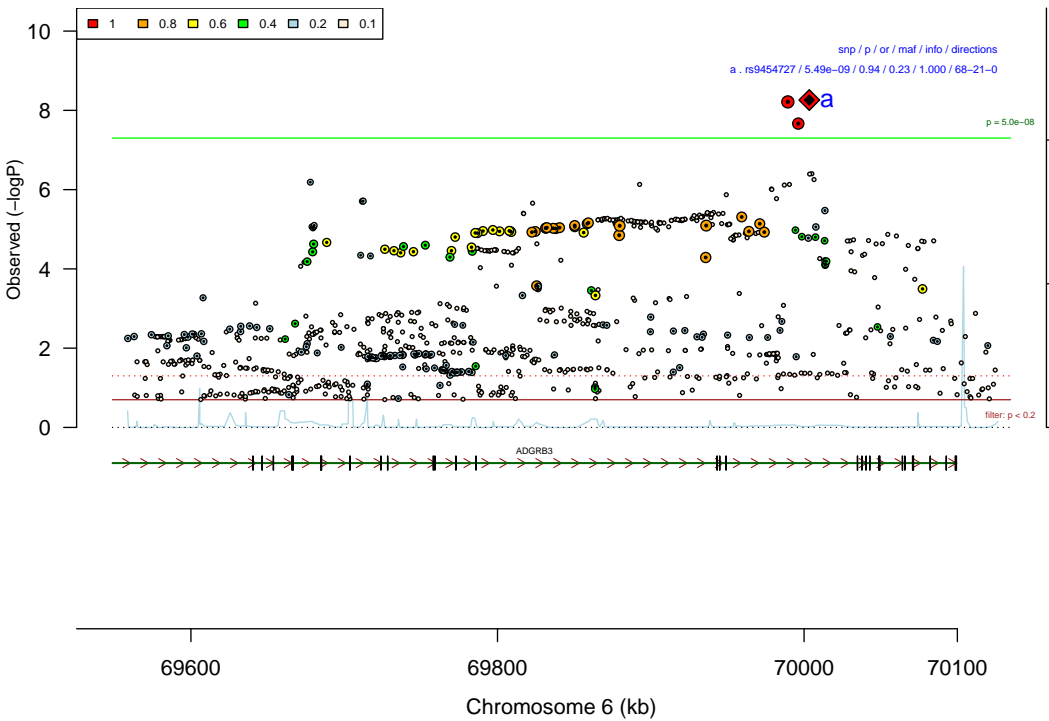

### SCZ\_cond\_rs9454727-chr6

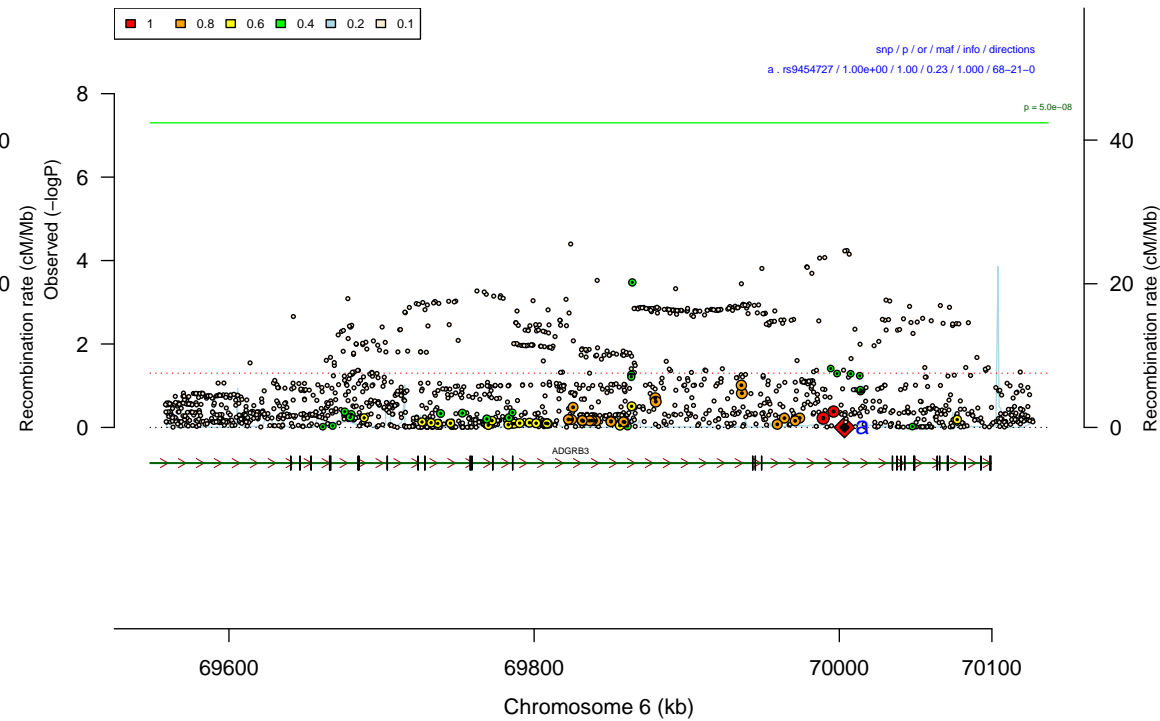

### SCZ\_uncond-rs73292401-chr17

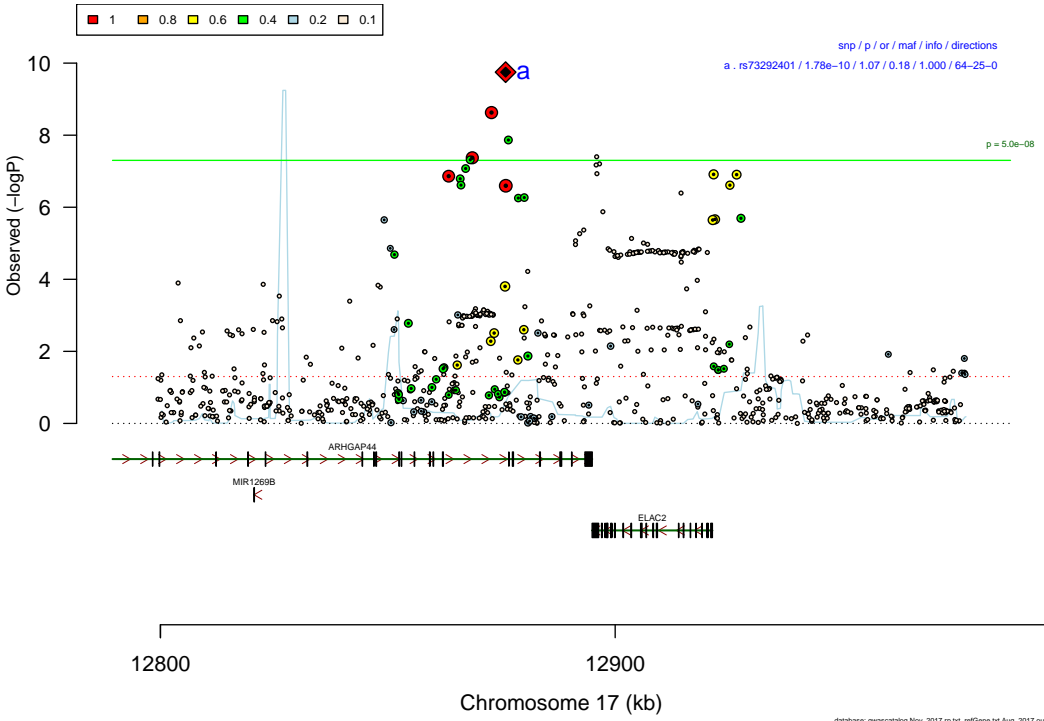

### SCZ\_cond\_rs73292401-chr17

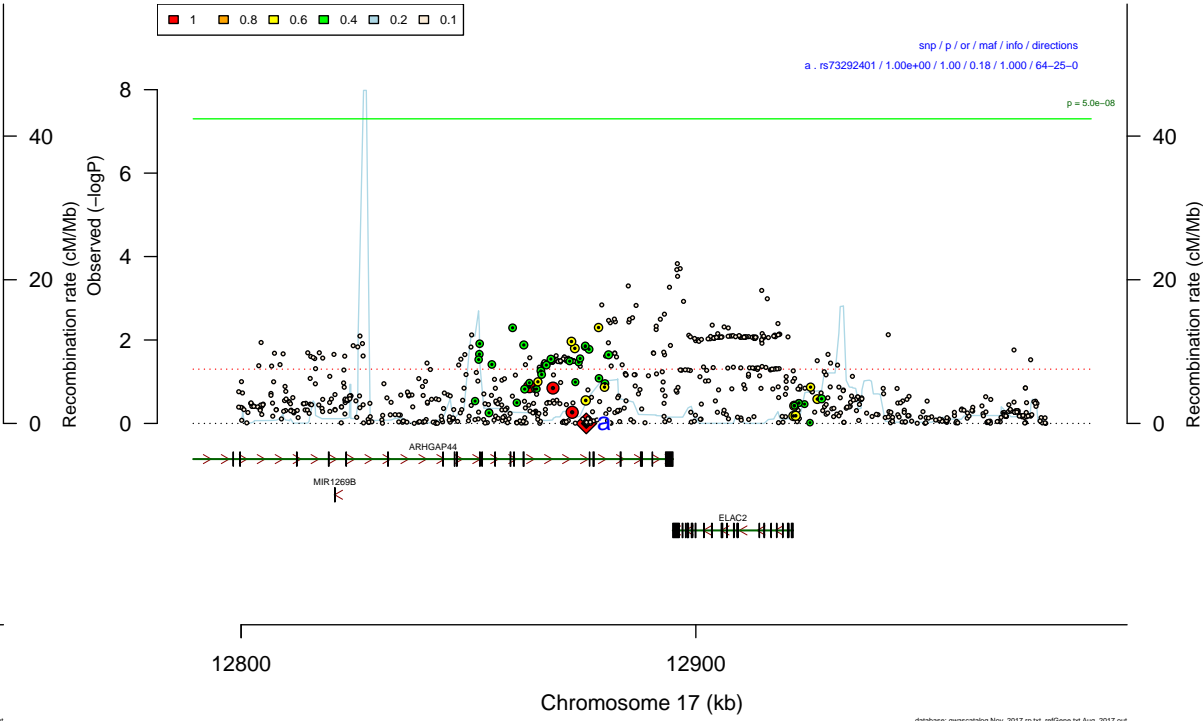

### SCZ\_uncond-rs61920311-chr12

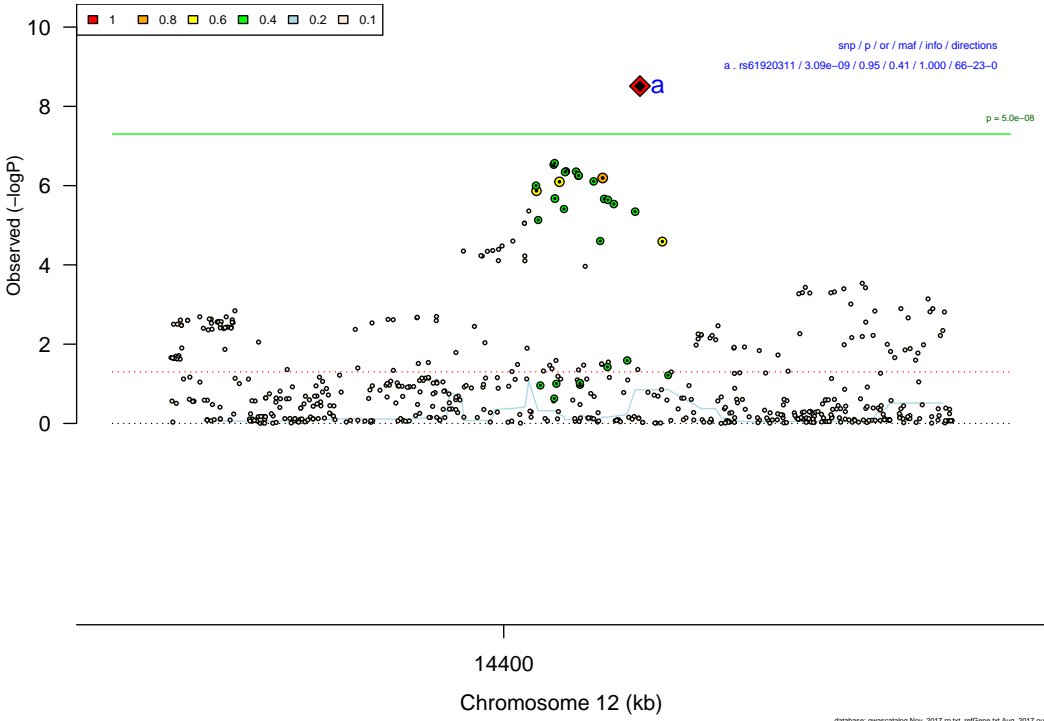

### SCZ\_cond\_rs61920311-chr12

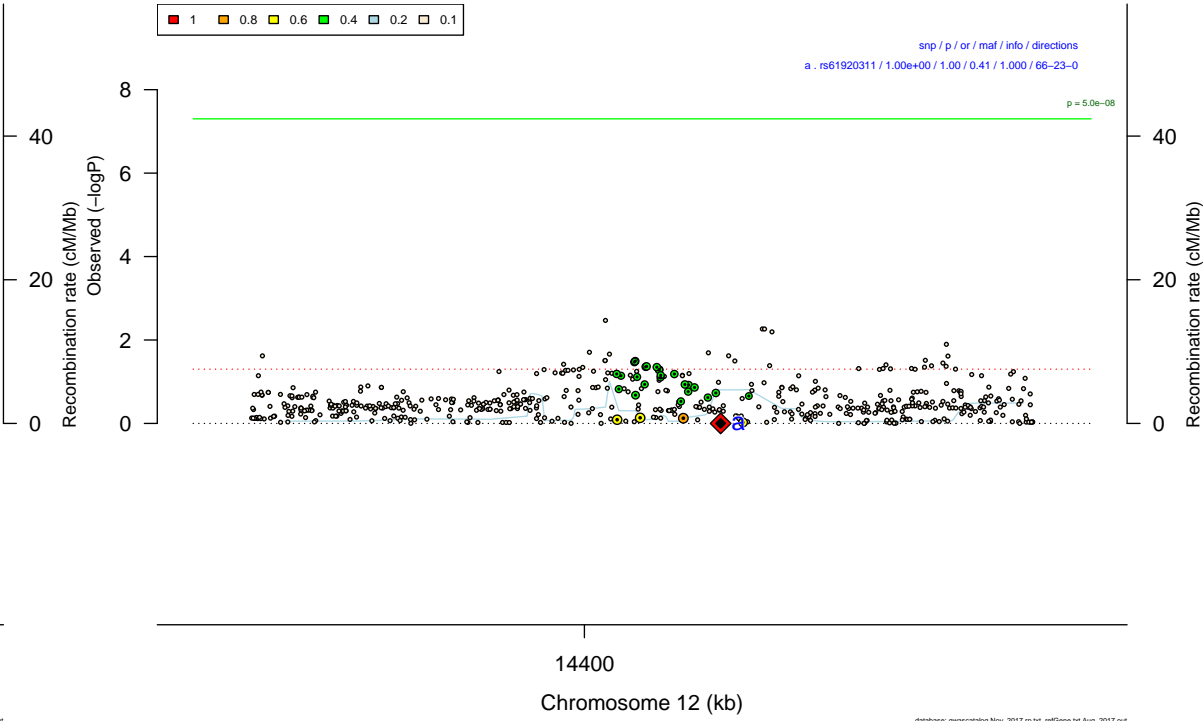



### SCZ\_uncond-rs6715366-chr2

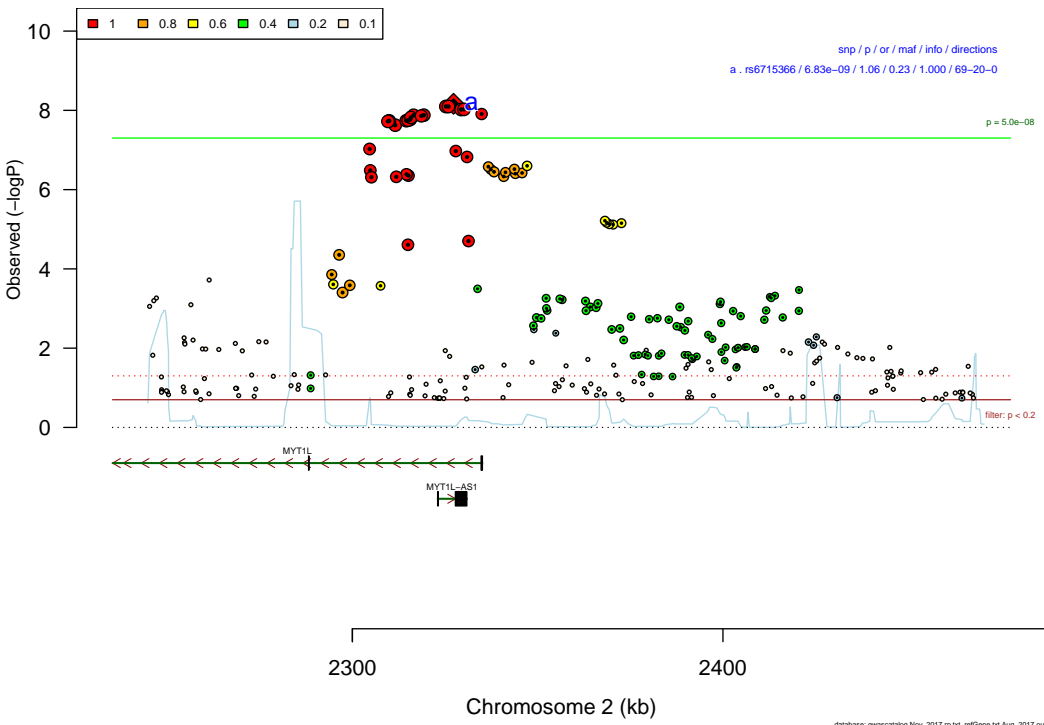

### SCZ\_cond\_rs6715366-chr2

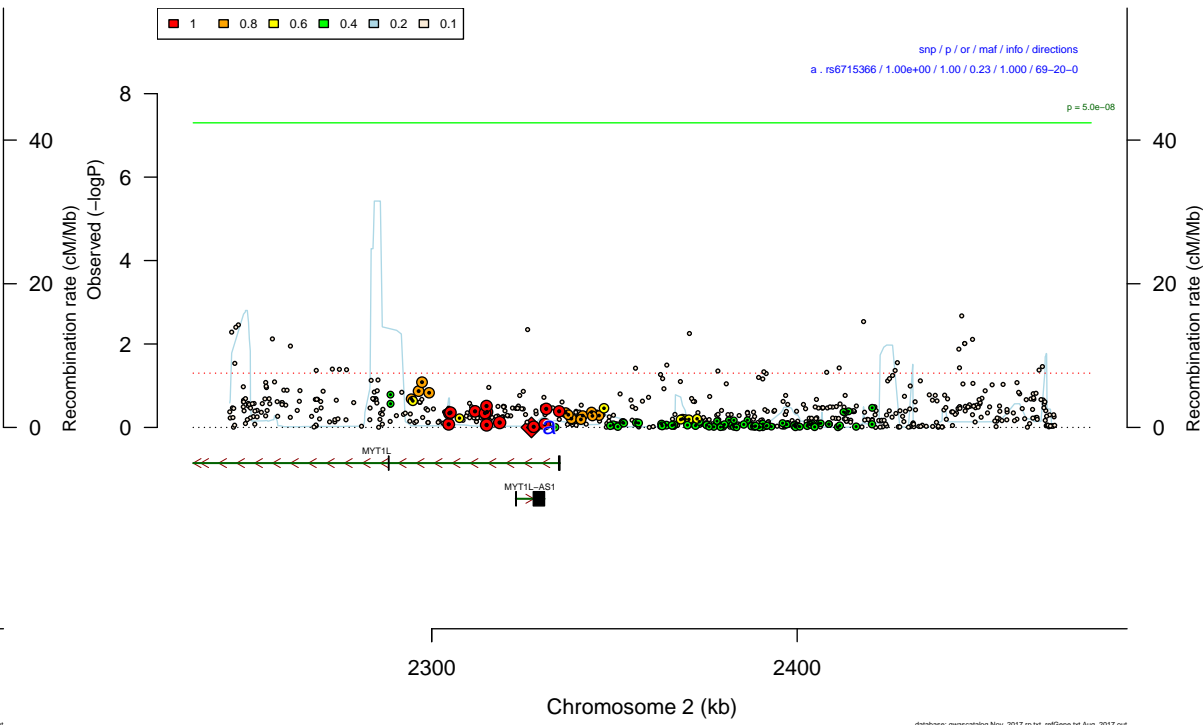

### SCZ\_uncond-rs60135207-chr3

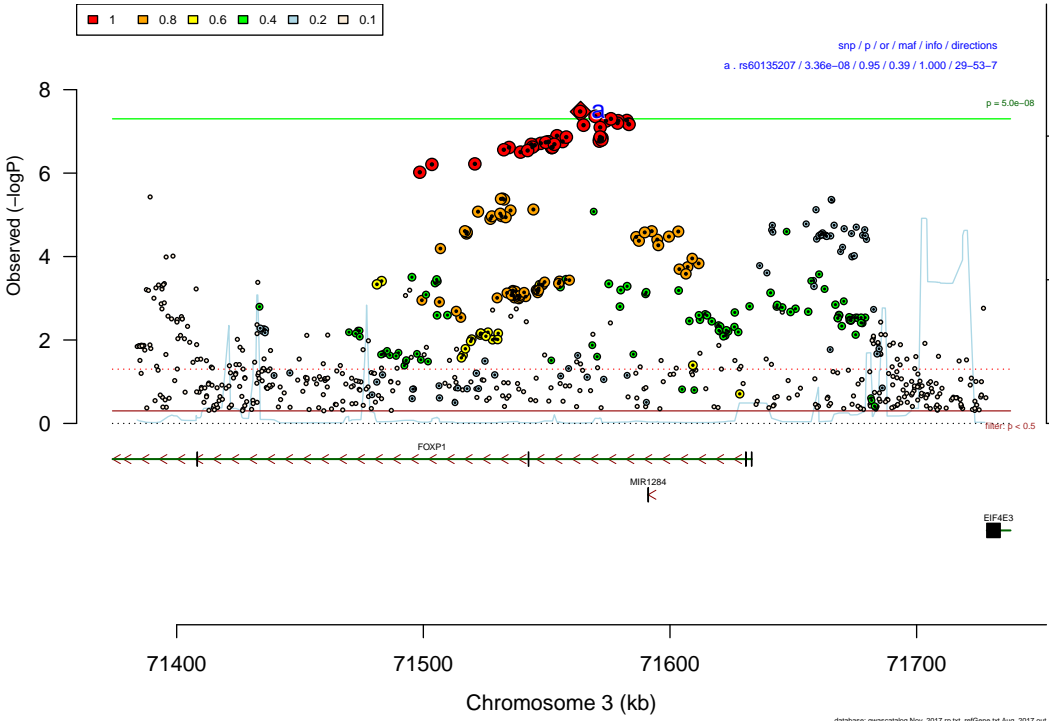

### SCZ\_cond\_rs60135207-chr3

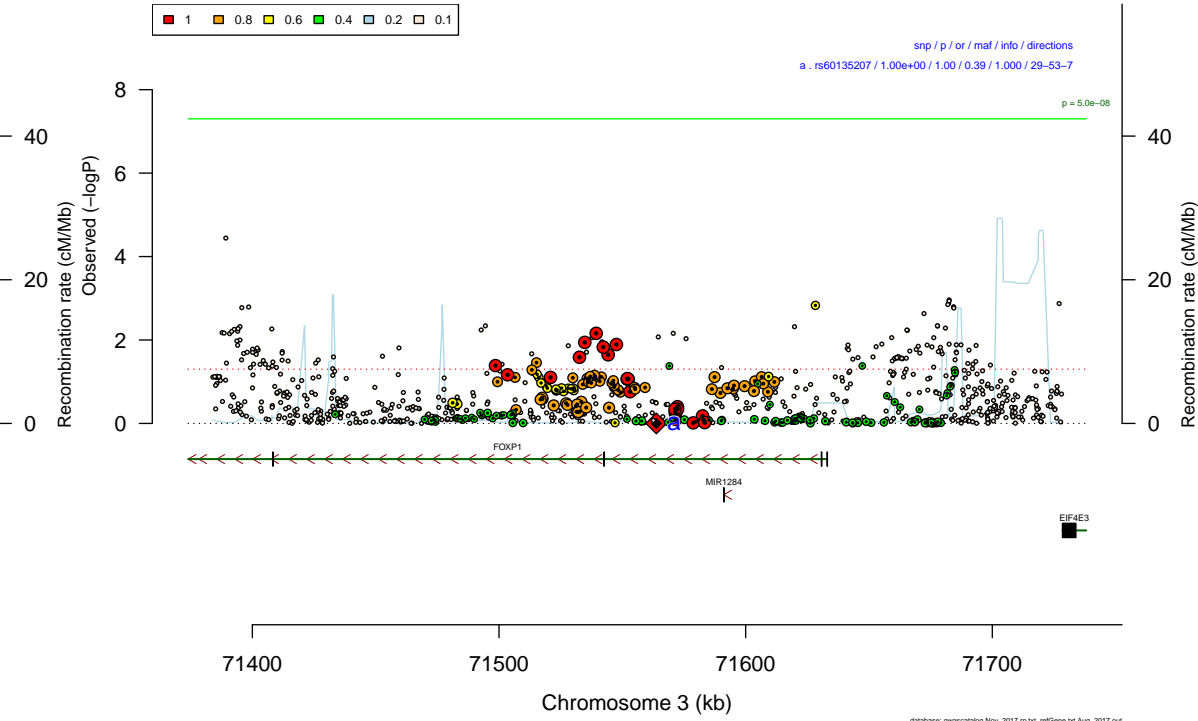

### SCZ\_uncond-rs9813516-chr3

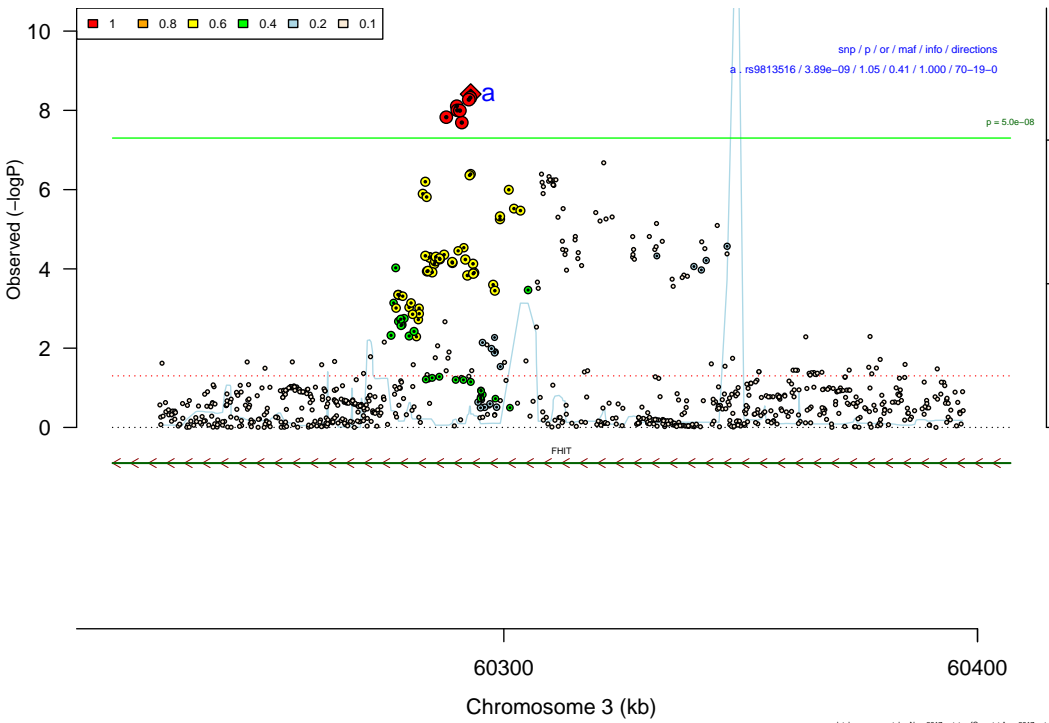

### SCZ\_cond\_rs9813516-chr3

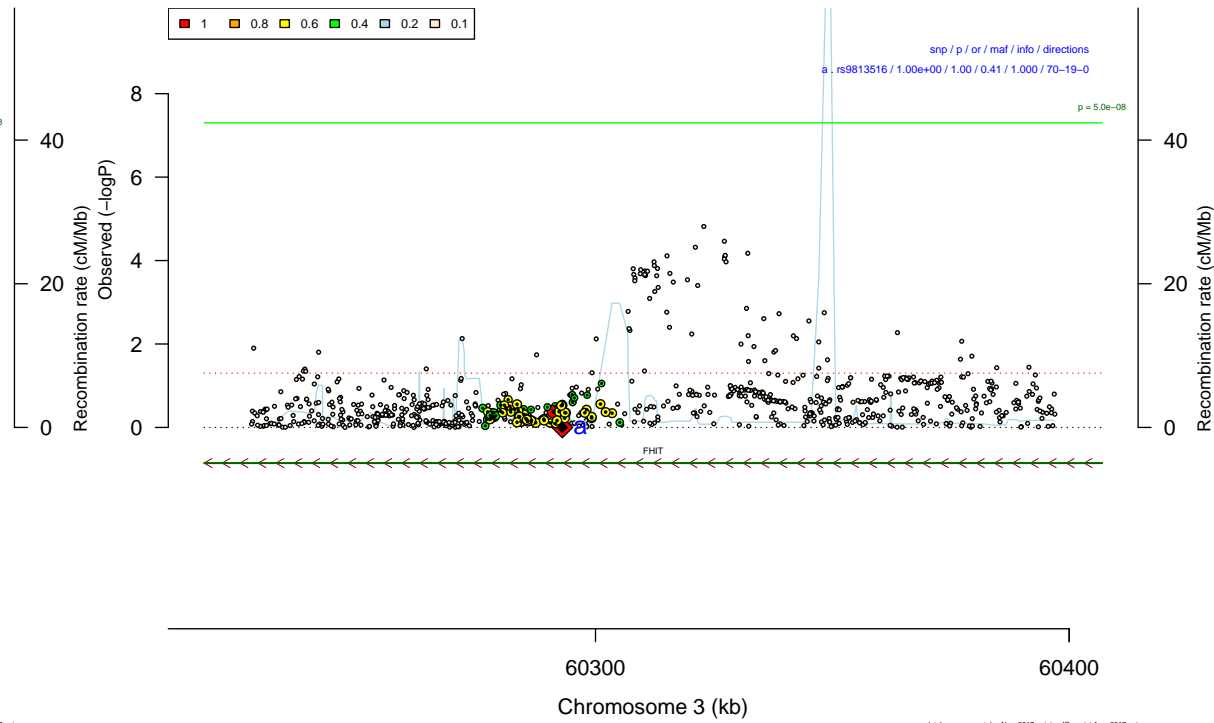

### SCZ\_uncond-rs6588355-chr1

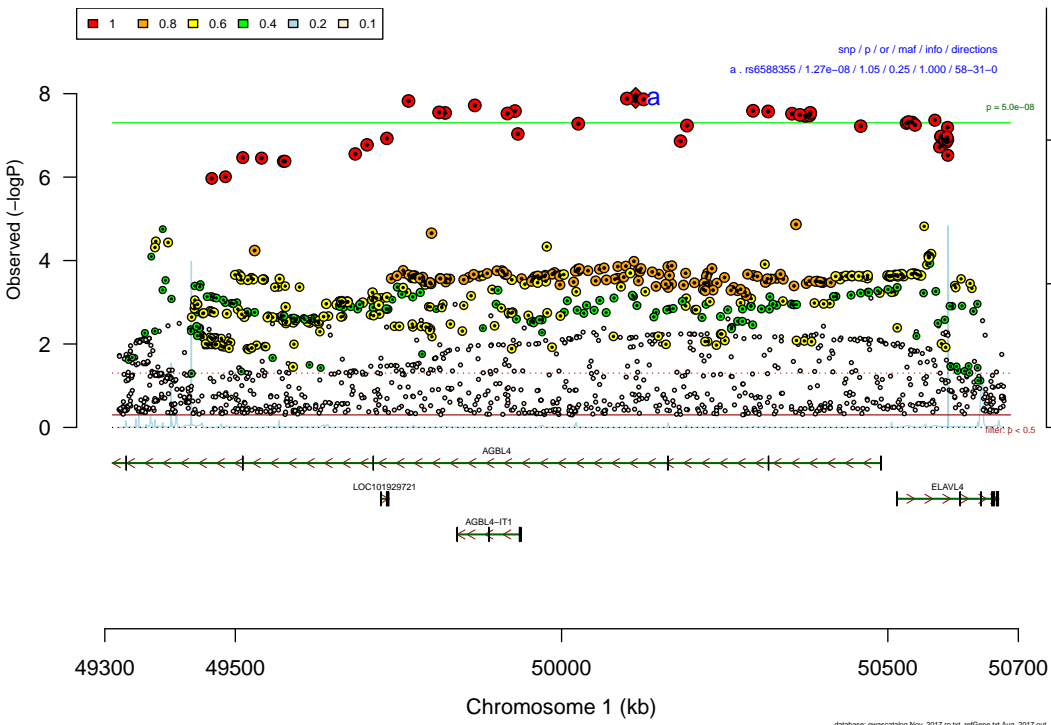

### SCZ\_cond\_rs6588355-chr1

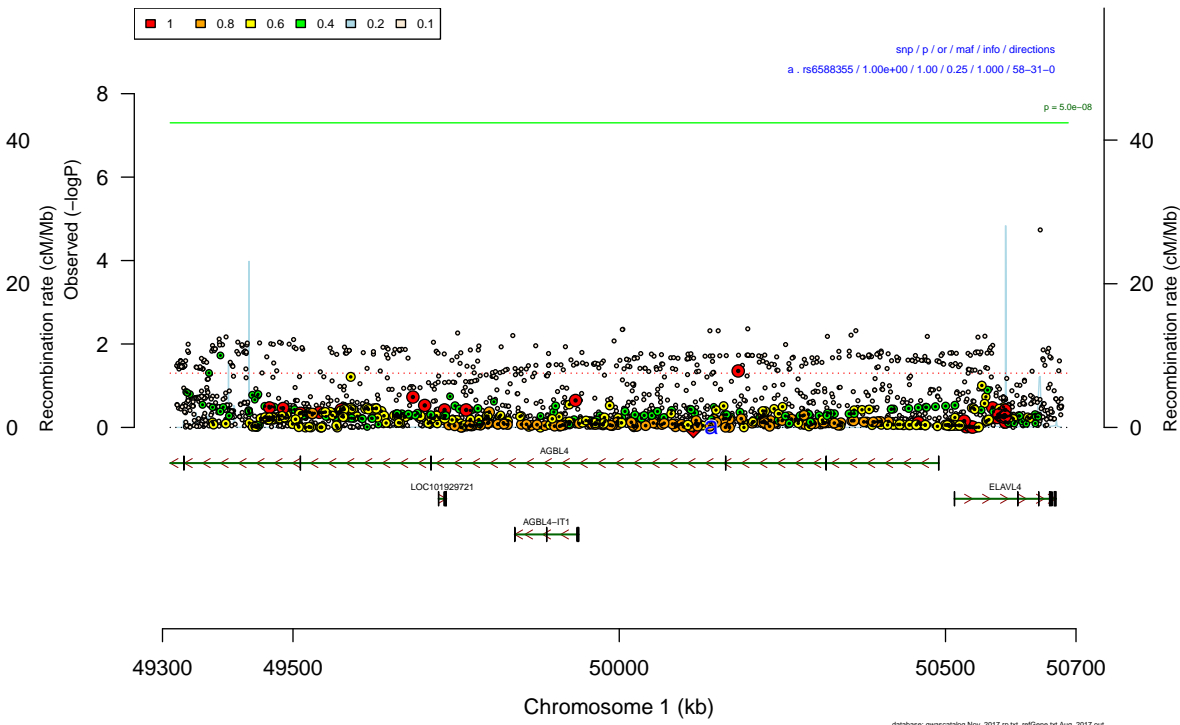

### SCZ\_uncond-rs117799466-chr15

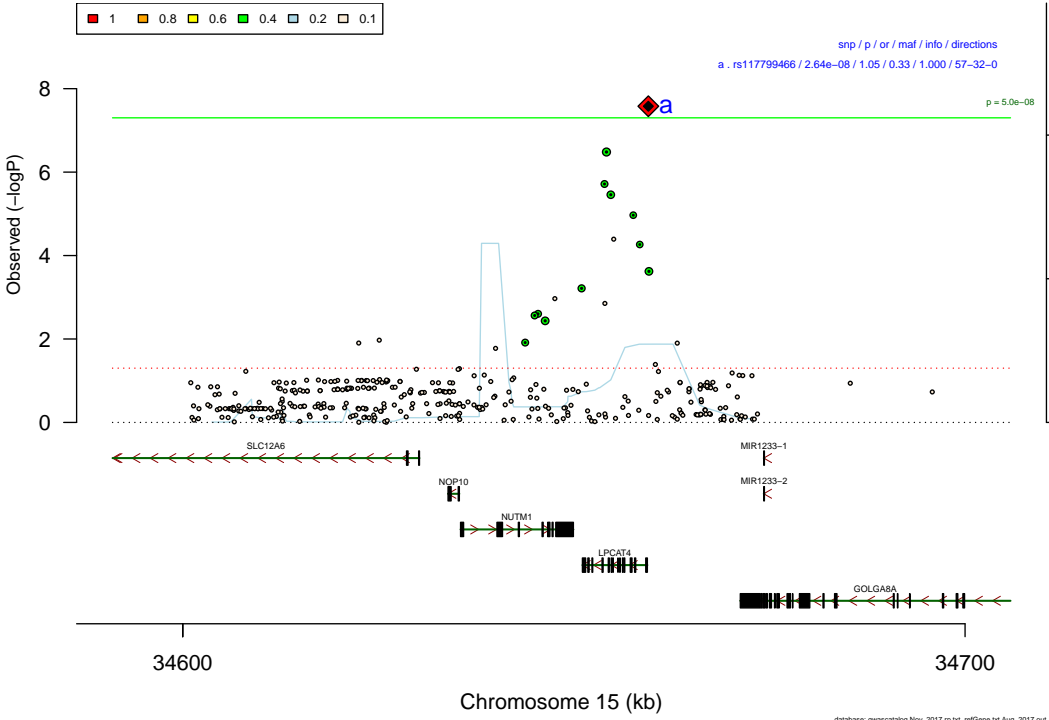

### SCZ\_cond\_rs117799466-chr15

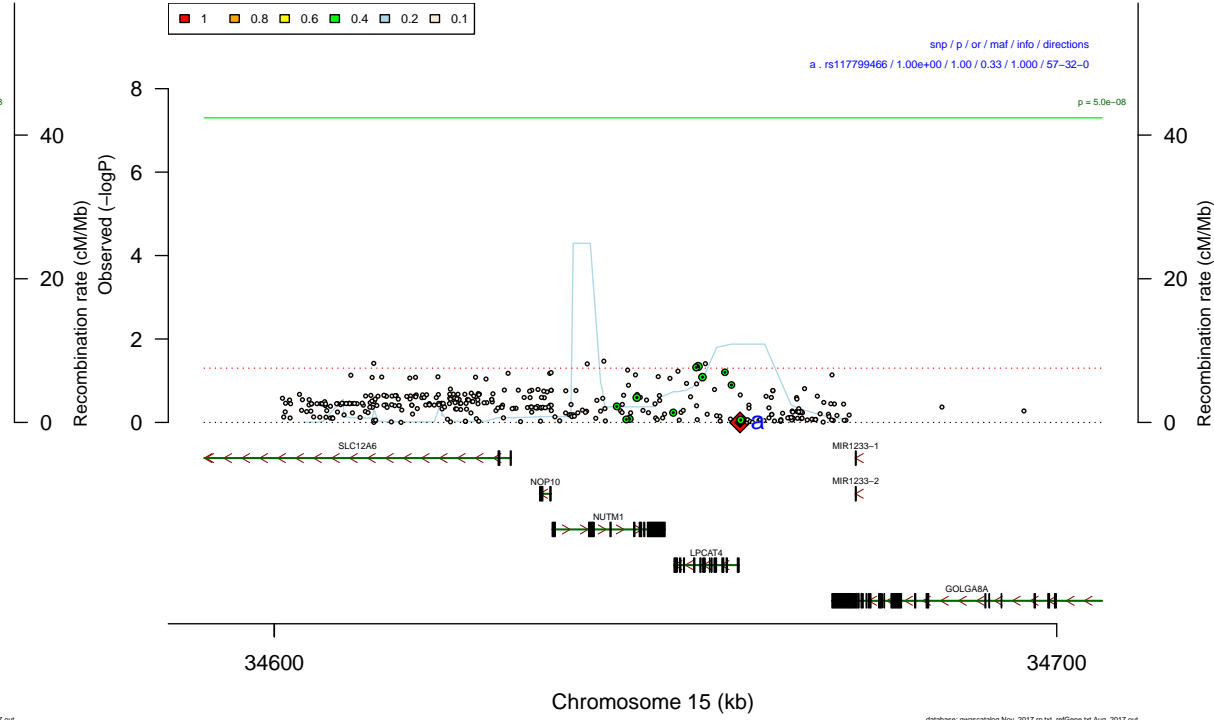

### SCZ\_uncond-rs8104557-chr19

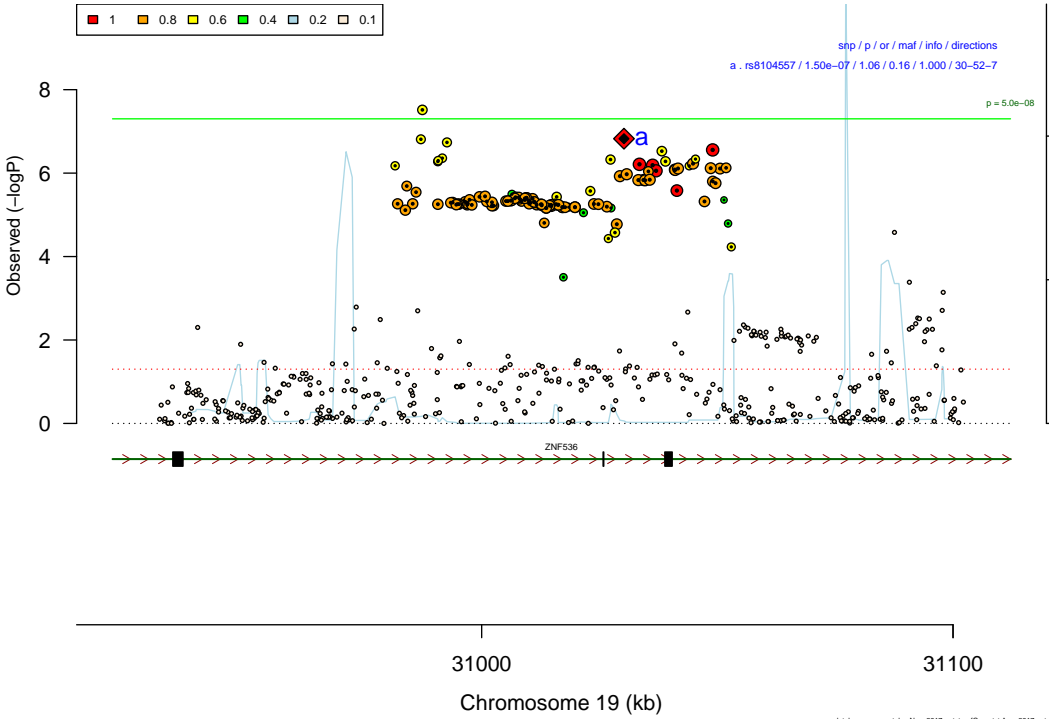

### SCZ\_cond\_rs8104557-chr19

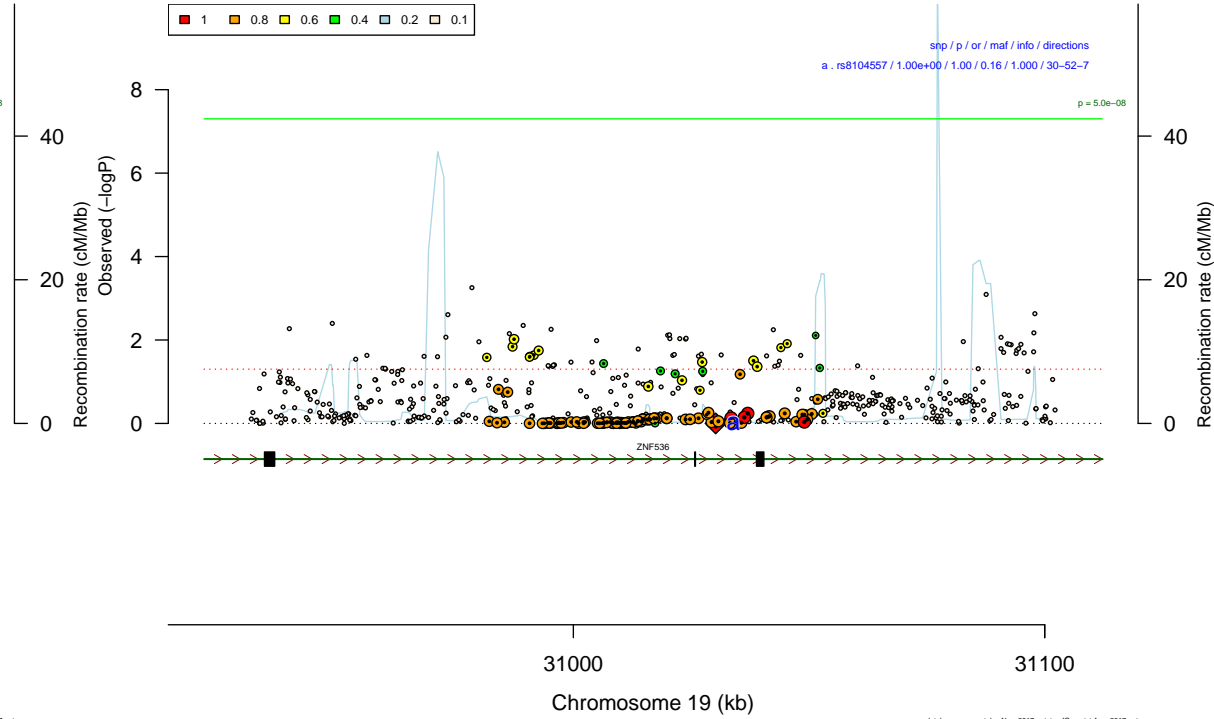

### SCZ\_uncond-rs35045093-chr7

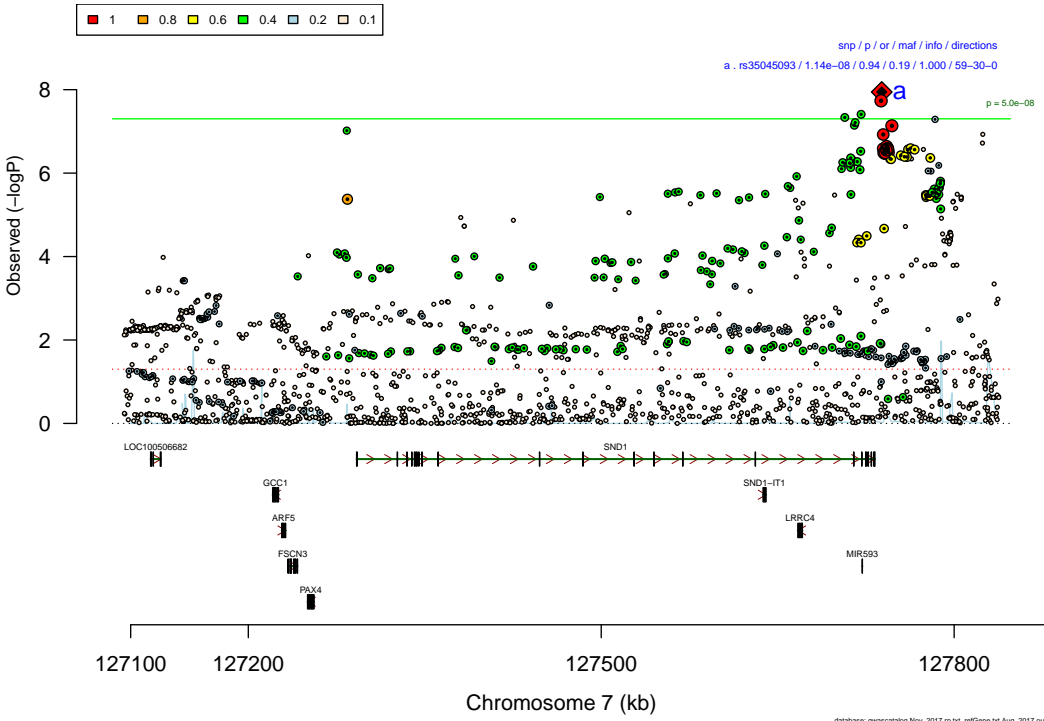

### SCZ\_cond\_rs35045093-chr7

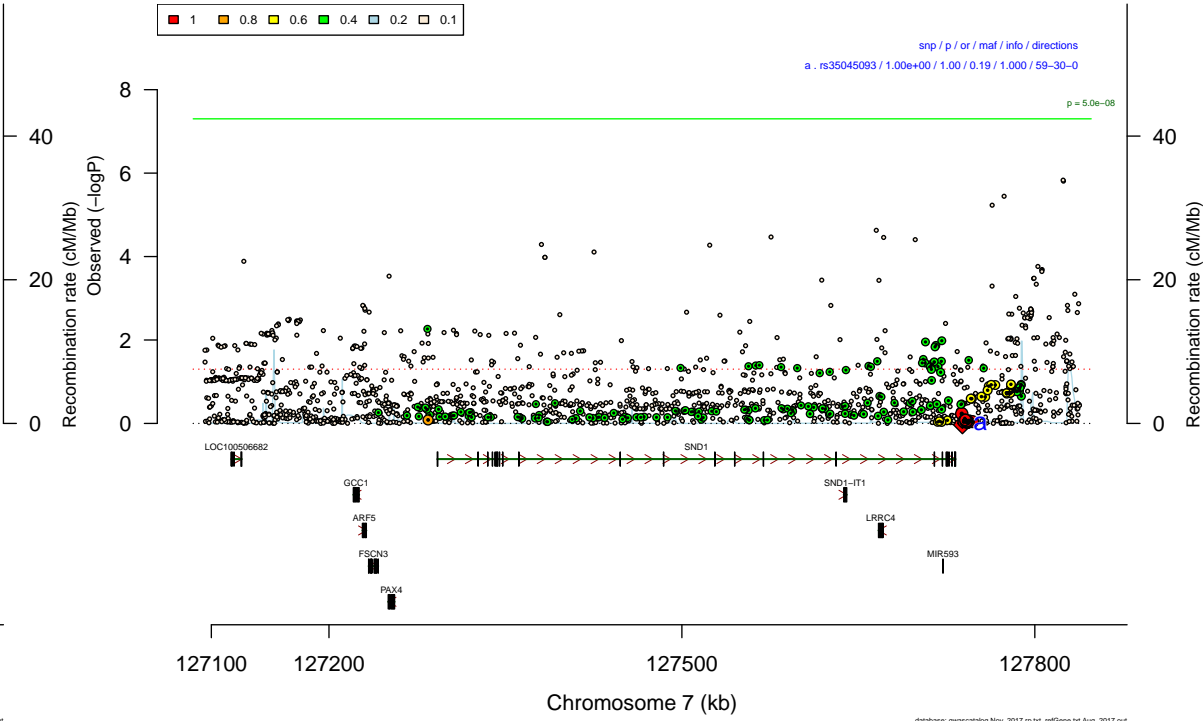

### SCZ\_uncond-rs2078266-chr9

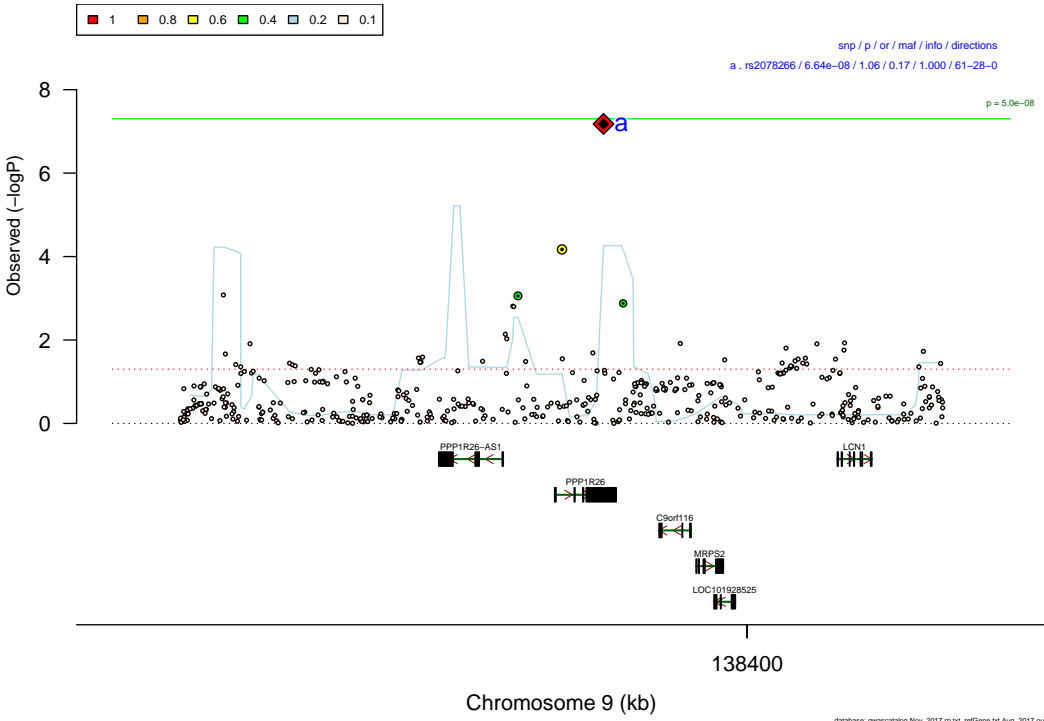

### SCZ\_cond\_rs2078266-chr9

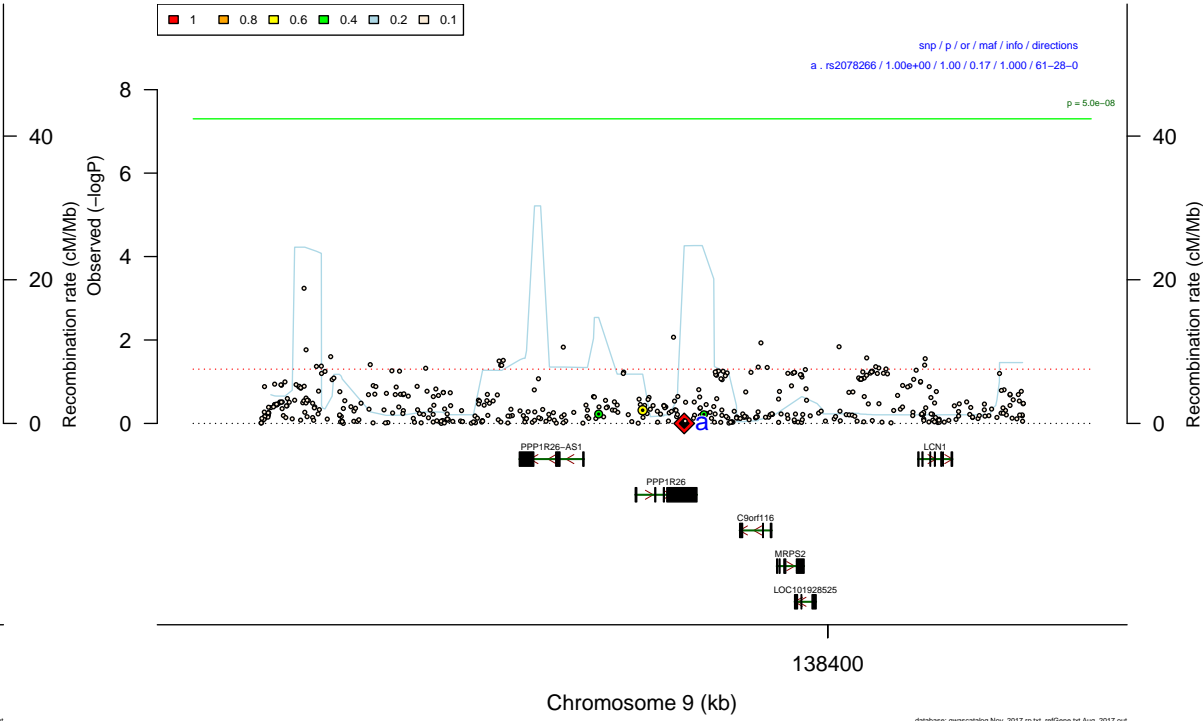



### SCZ\_uncond-rs55929115-chr3

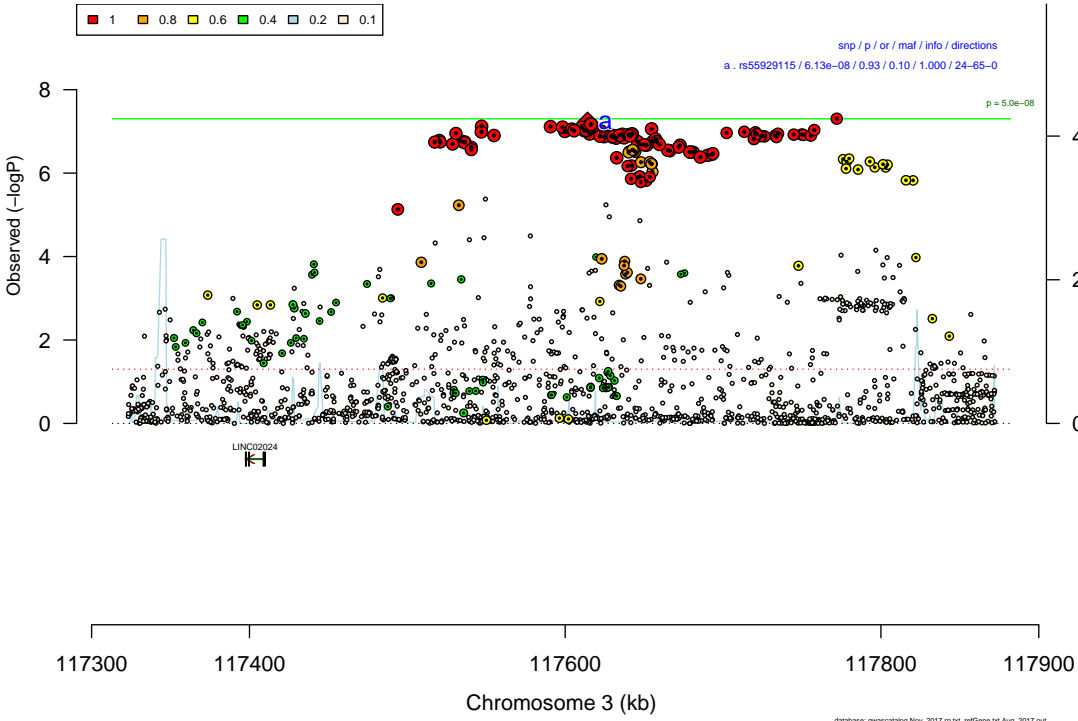

### SCZ\_cond\_rs55929115-chr3

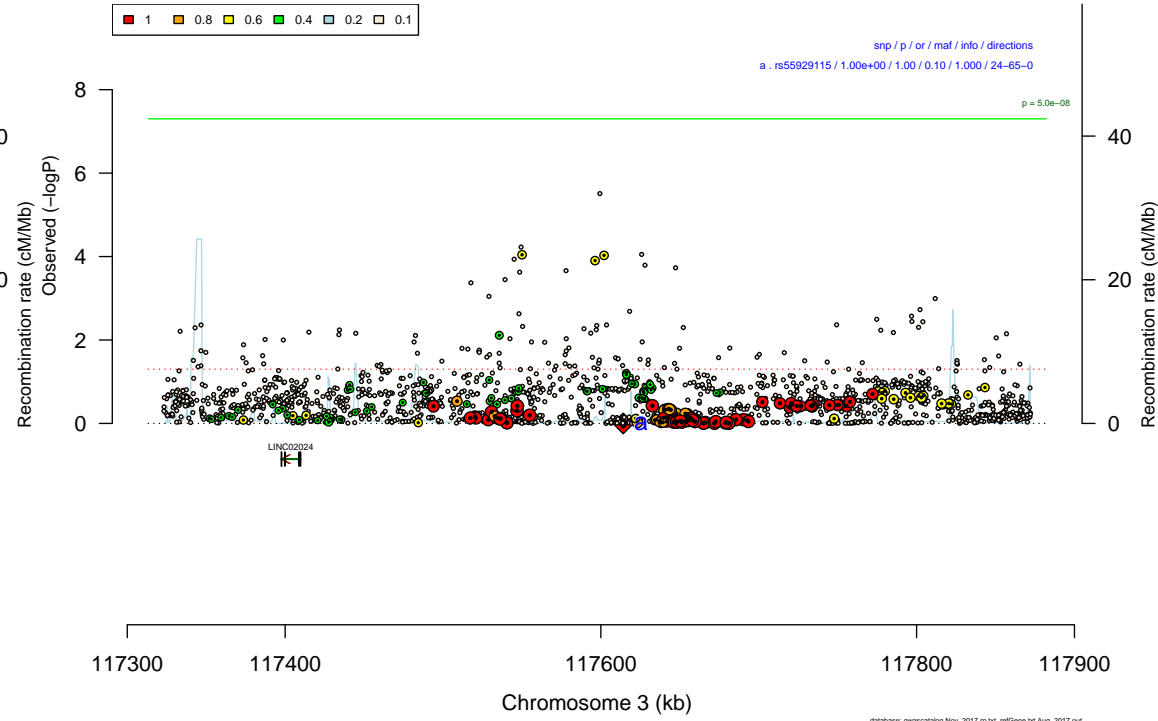

### SCZ\_uncond-rs13219424-chr6

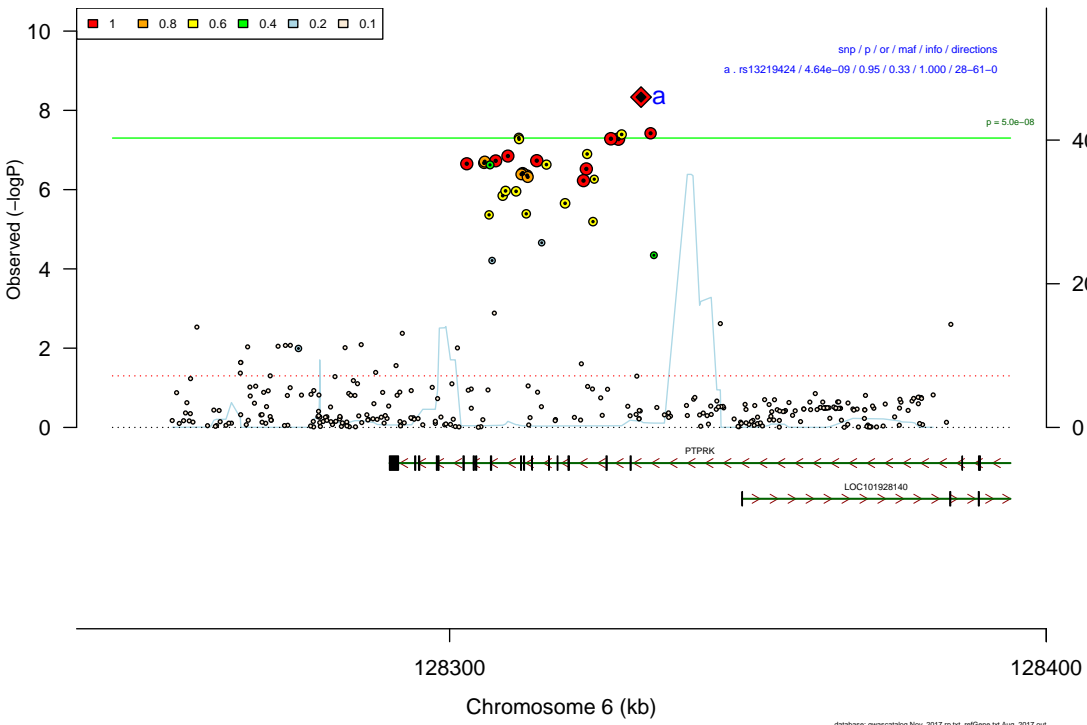

### SCZ\_cond\_rs13219424-chr6

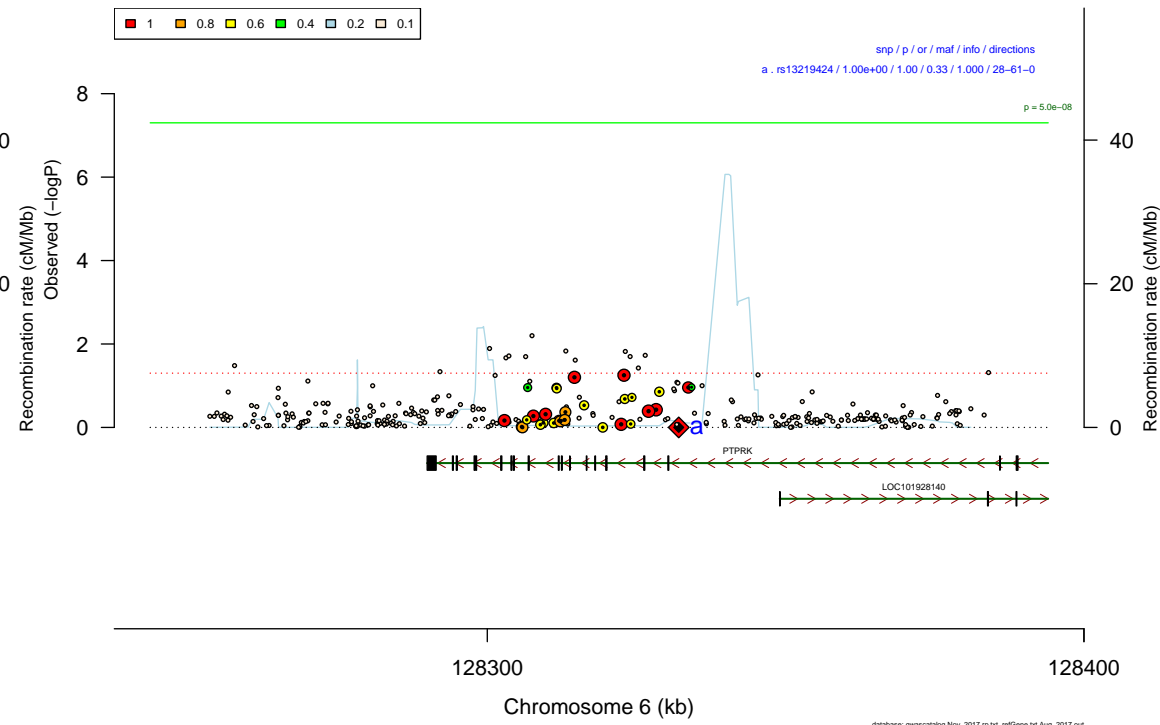

### SCZ\_uncond-rs141216273-chr2

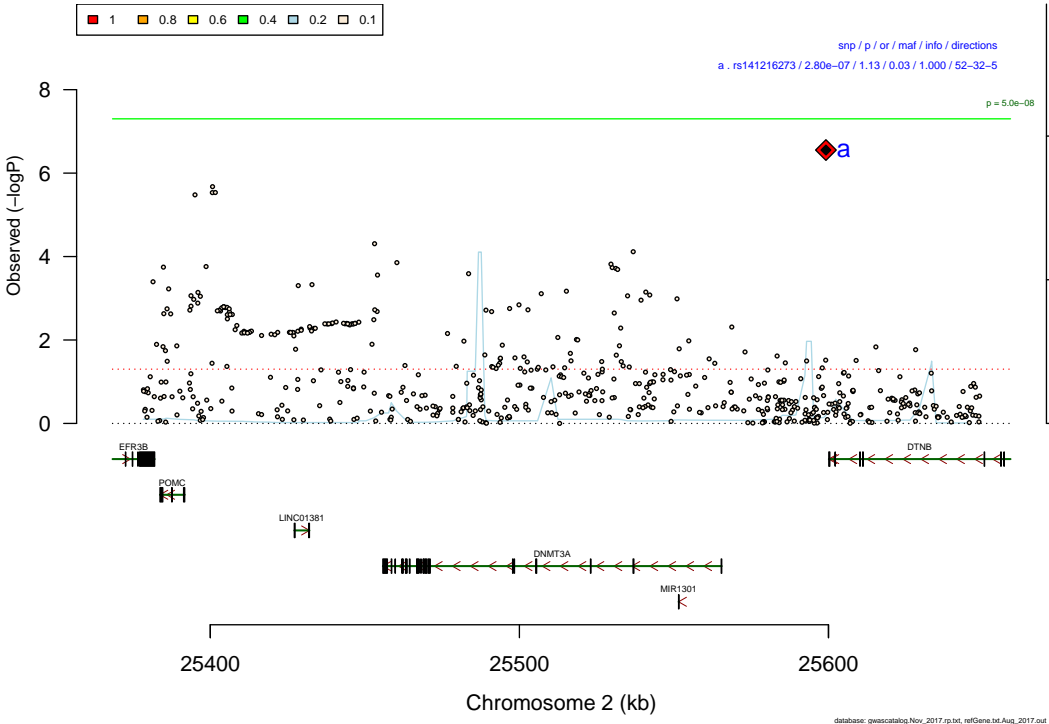

### SCZ\_cond\_rs141216273-chr2

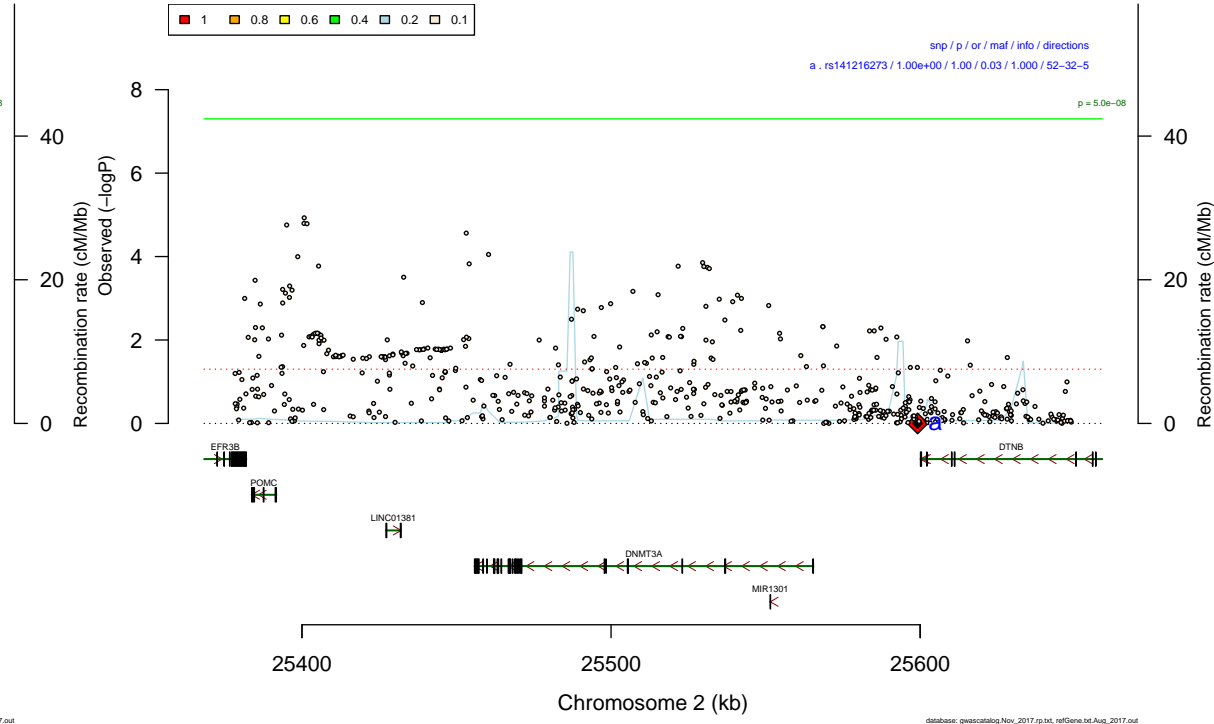

### SCZ\_uncond-rs2224086-chr1

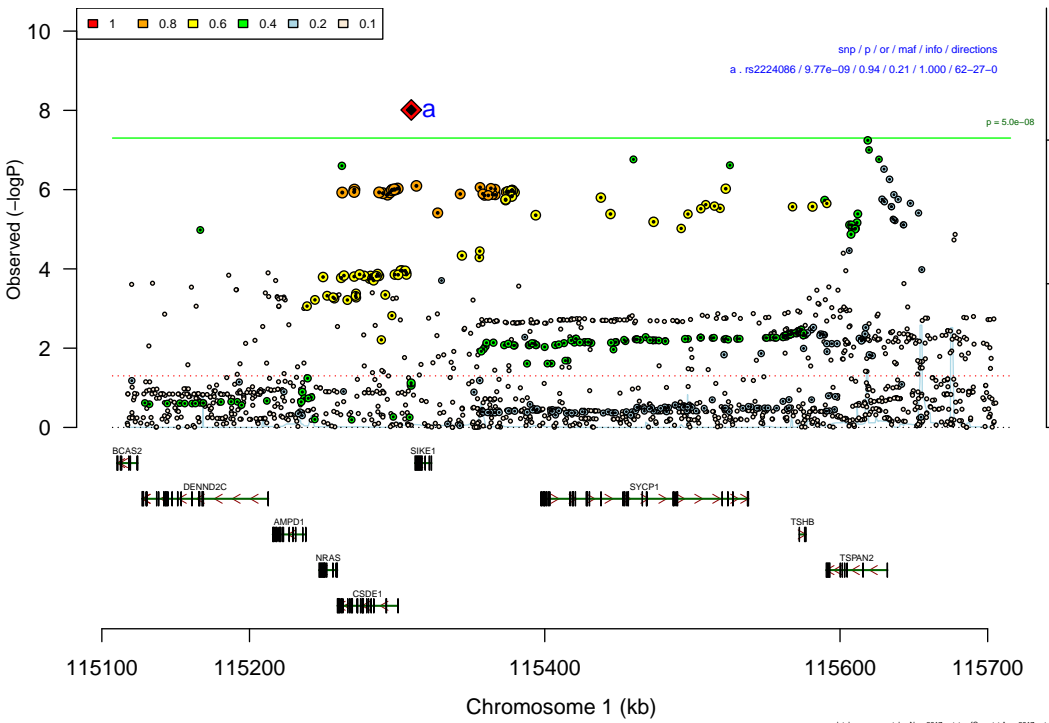

### SCZ\_cond\_rs2224086-chr1

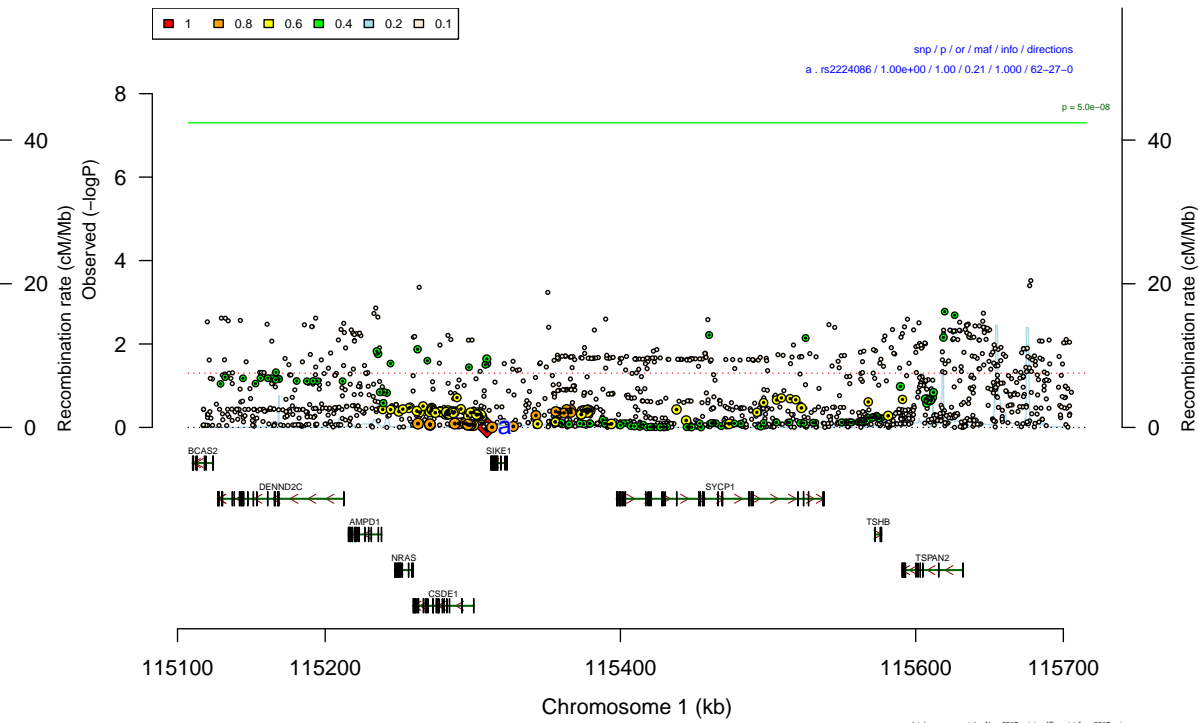

### SCZ\_uncond-rs2600490-chr8

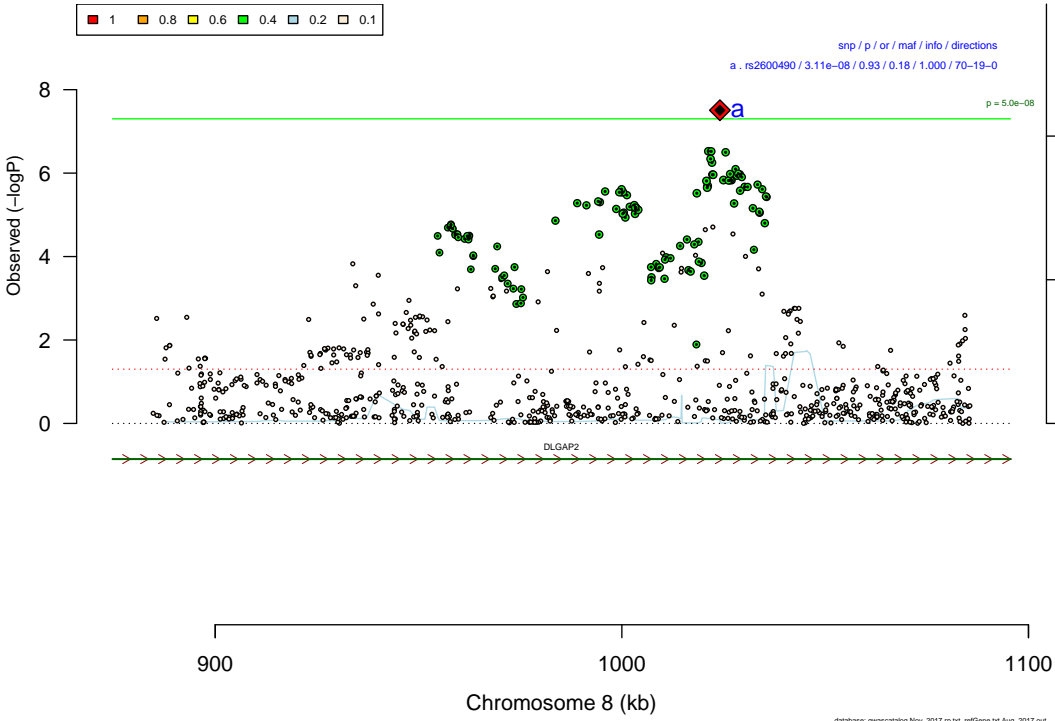

### SCZ\_cond\_rs2600490-chr8

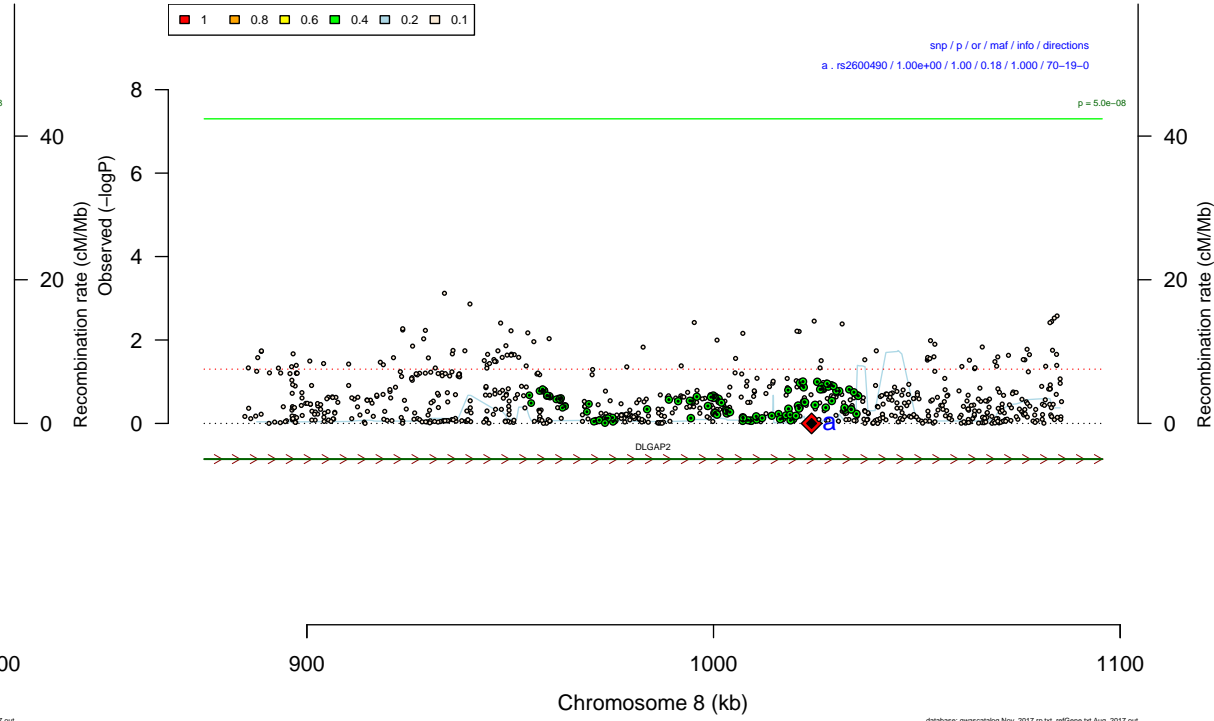

### SCZ\_uncond-rs12008603-chr23

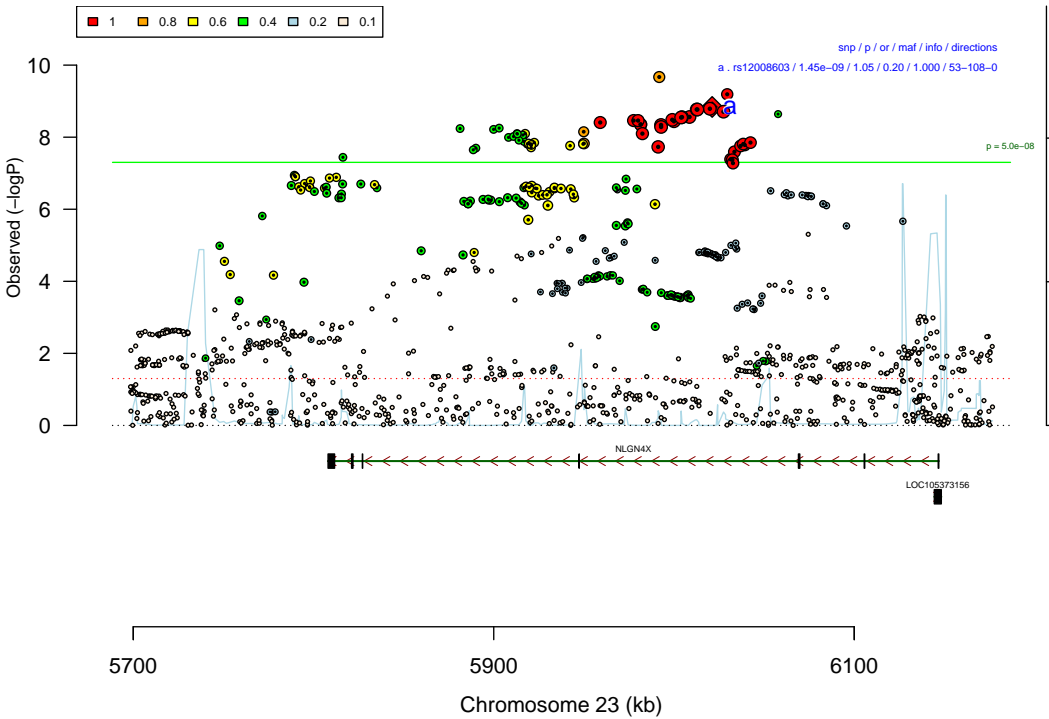

### SCZ\_cond\_rs12008603-chrX

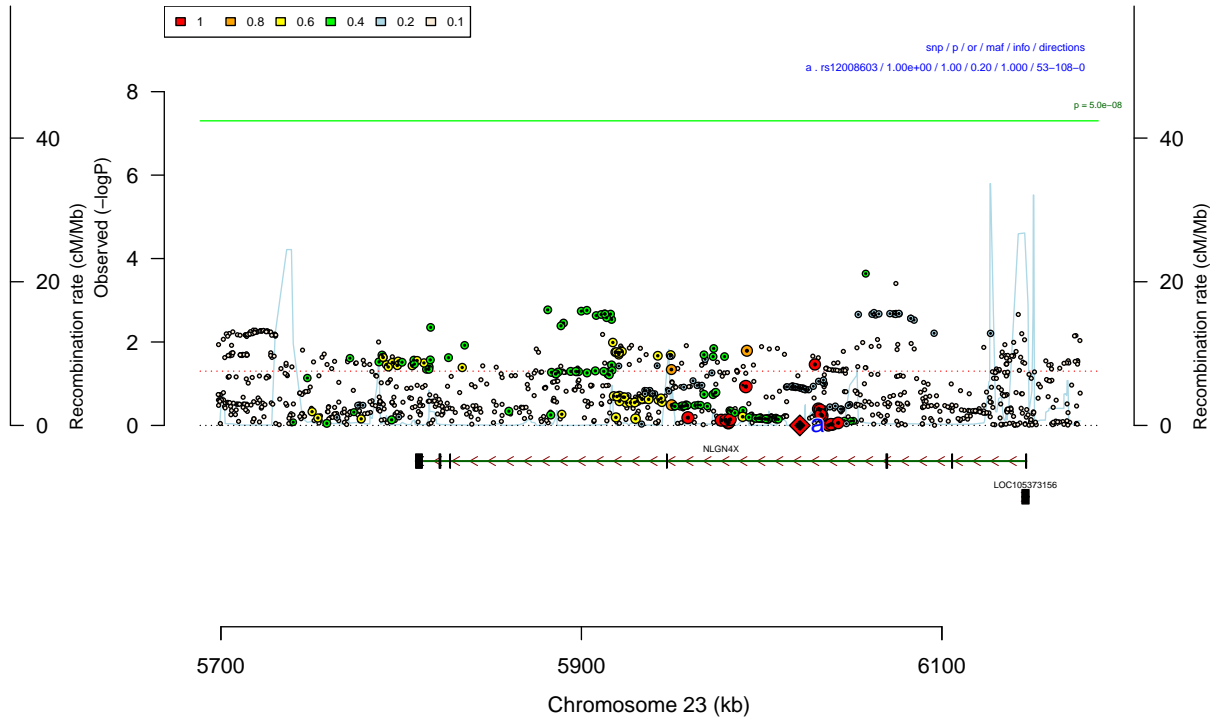

### SCZ\_uncond-rs1378559-chr23

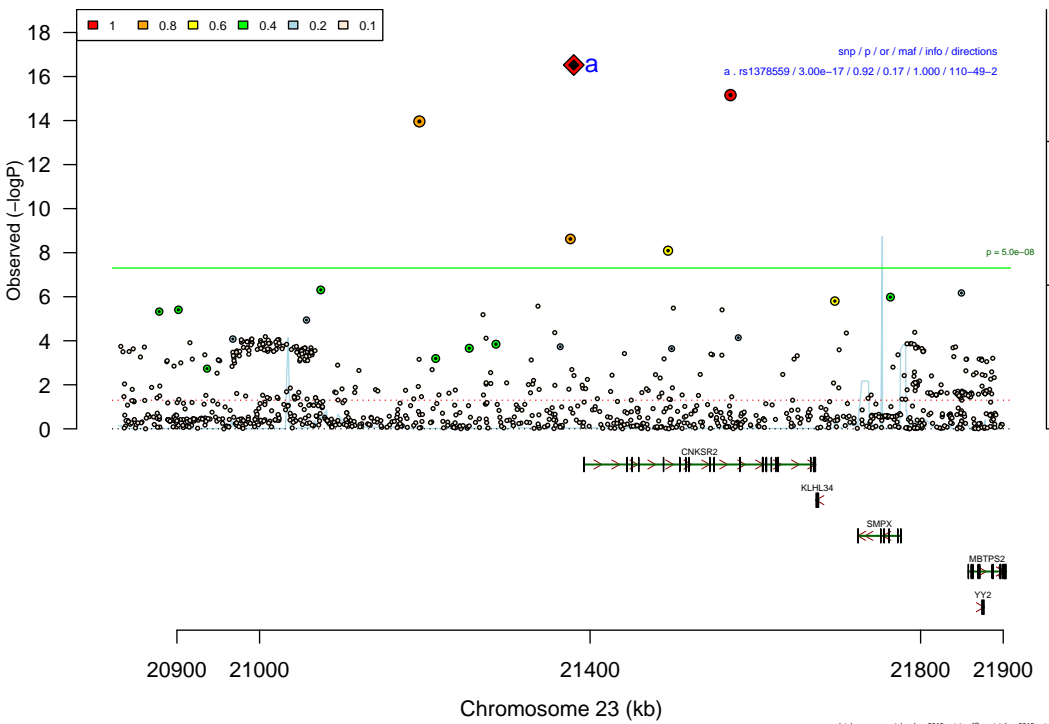

### SCZ\_cond\_rs1378559-chrX

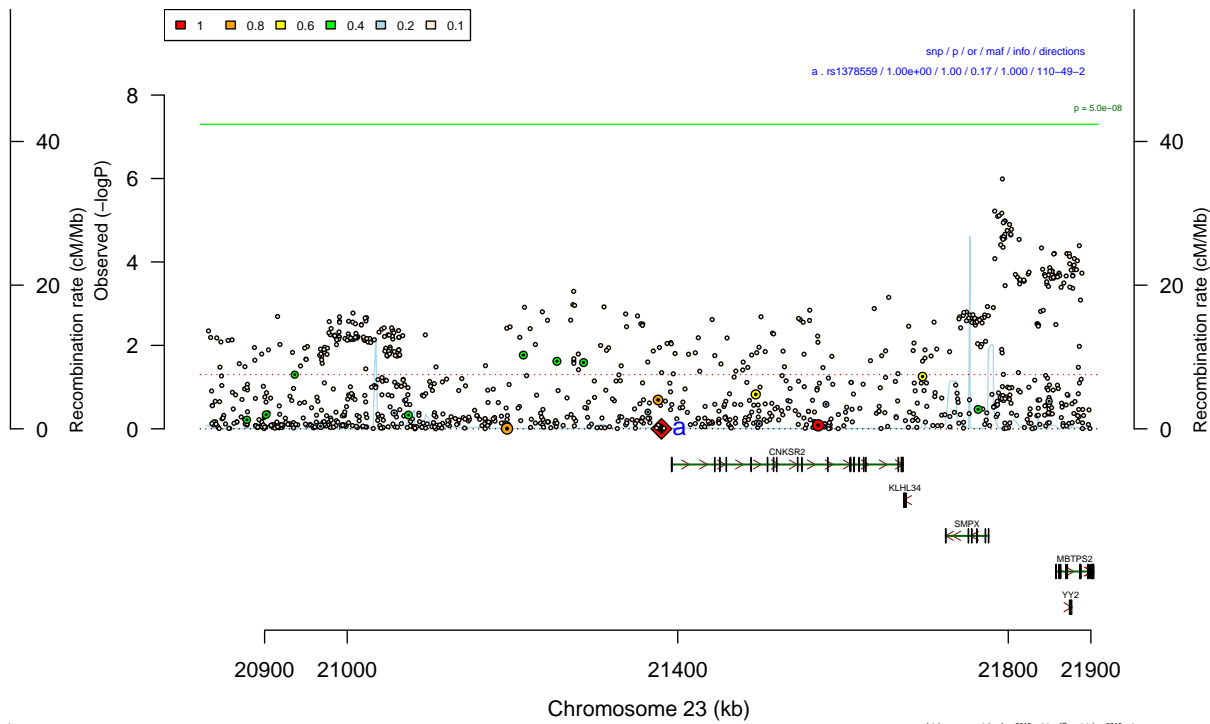

SCZ\_uncond-rs2361468-chr23

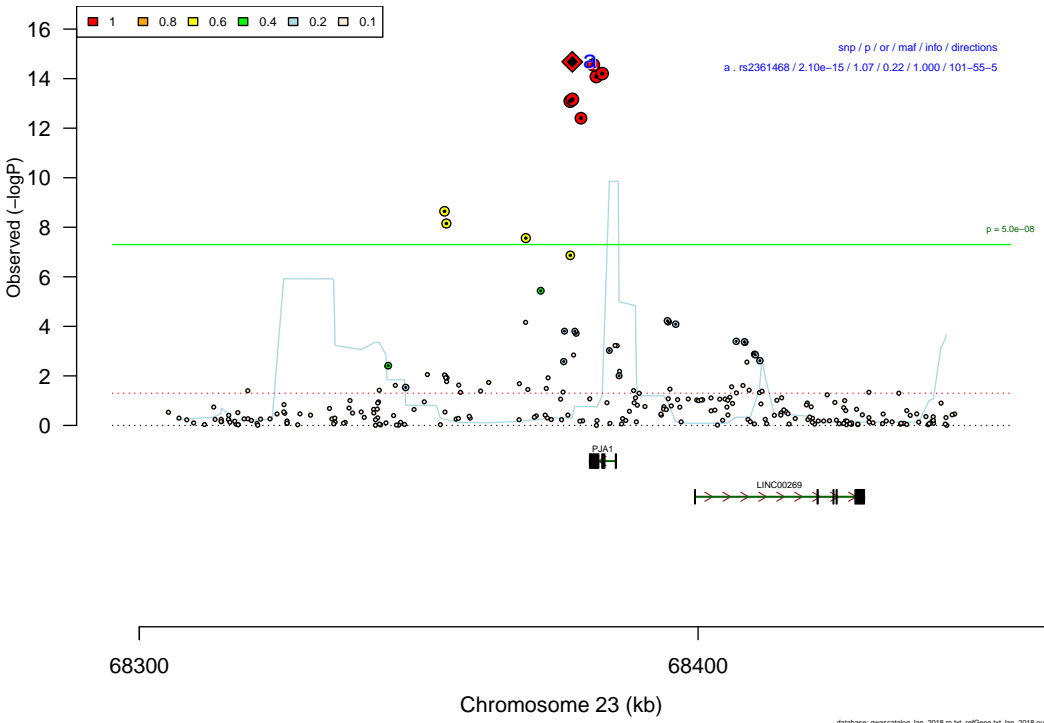

SCZ\_cond\_rs2361468-chrX

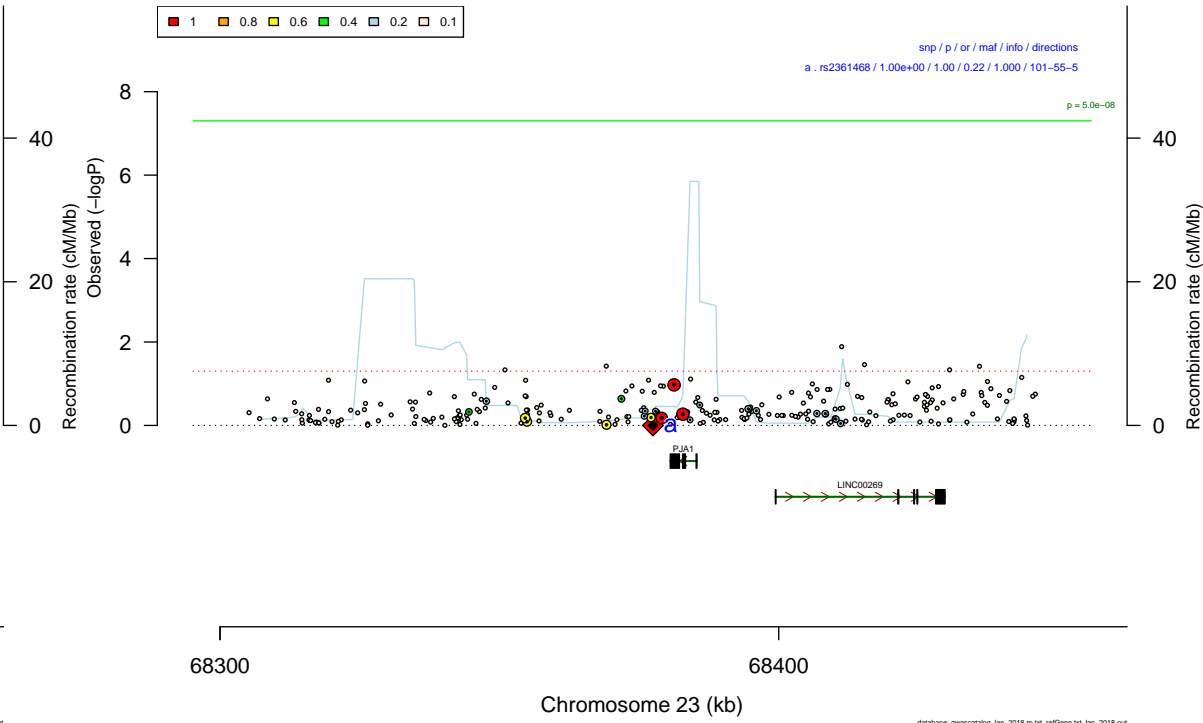

SCZ\_uncond-rs34539323-chr23

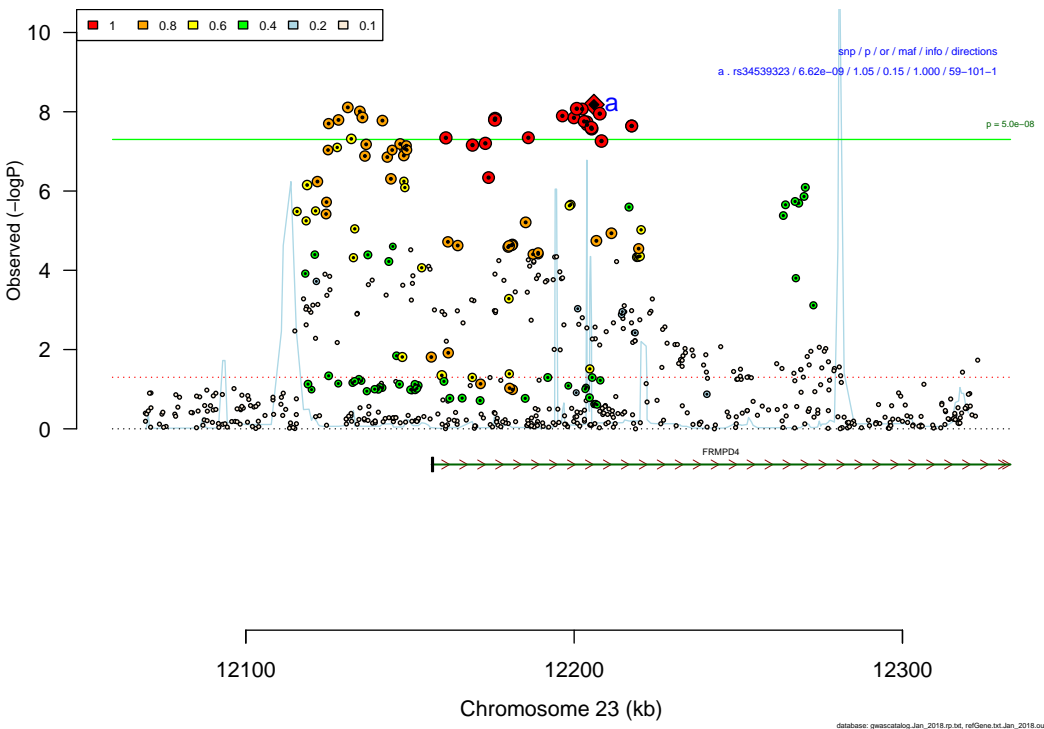

SCZ\_cond\_rs34539323-chrX

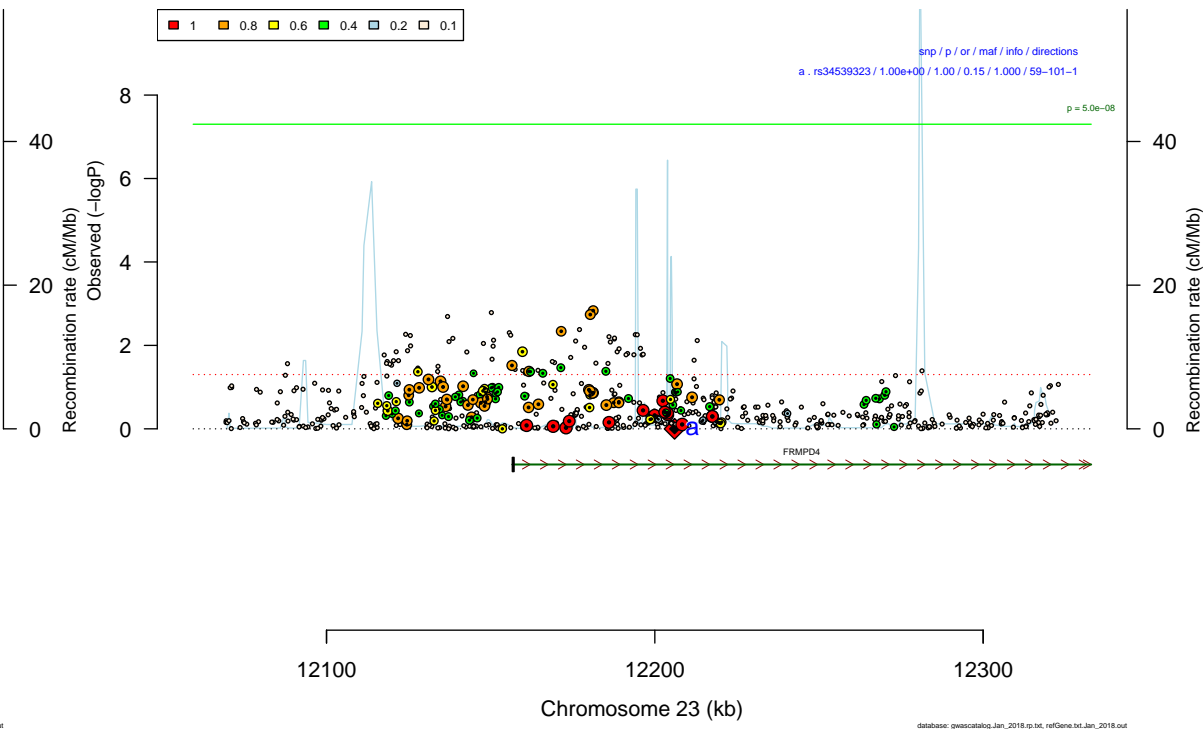

### SCZ\_uncond-rs5943629-chr23

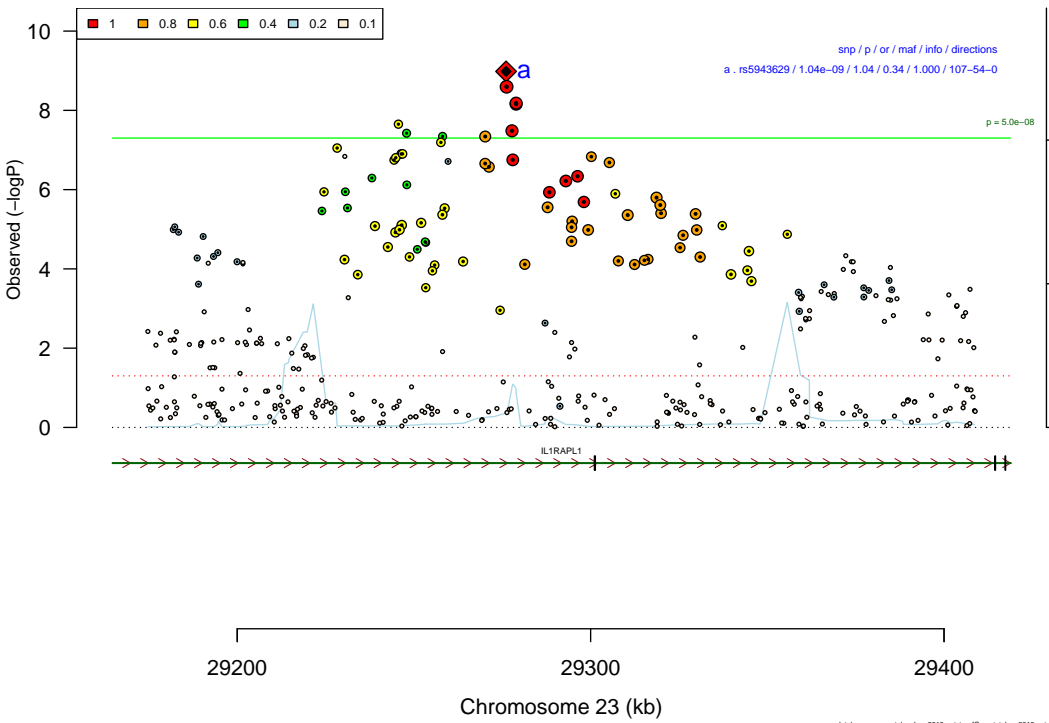

### SCZ\_cond\_rs5943629-chrX

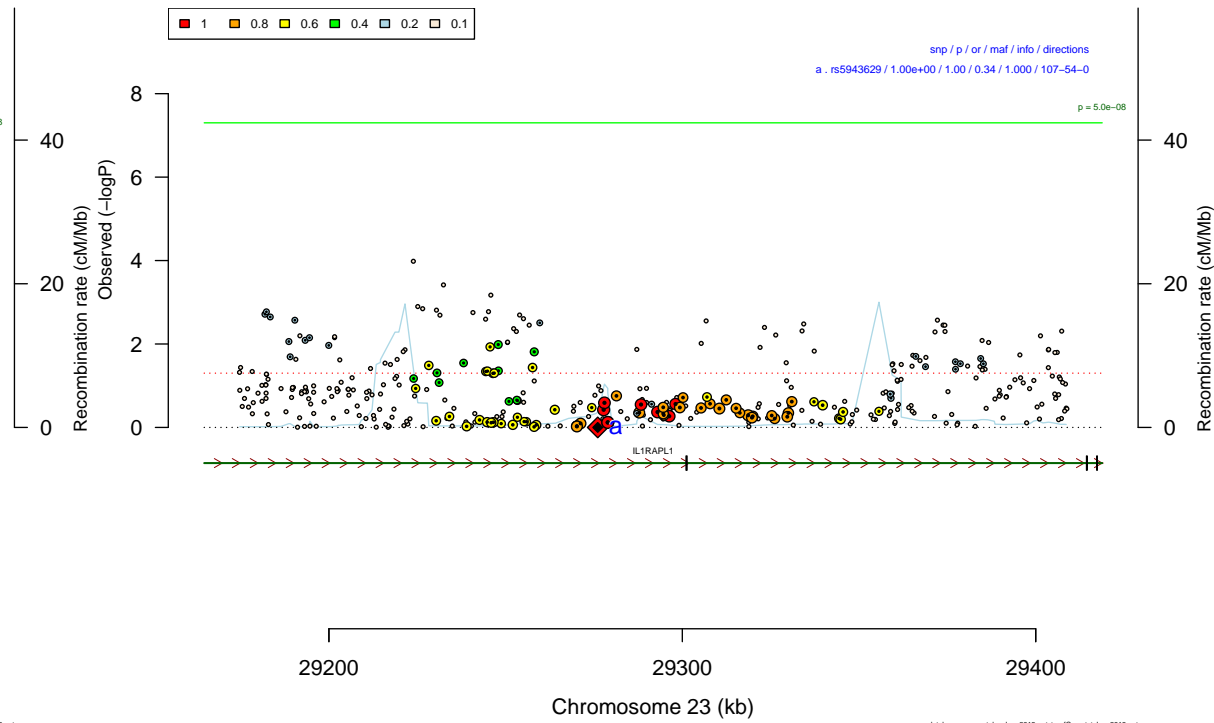

Supplement: NIHMS1824605-supplement-Fig_S7.pdf [file NIHMS1824605-supplement-Fig_S7.pdf]
