# Supplementary material
Source: PubMed Central journal article supplement (PMC9392466)

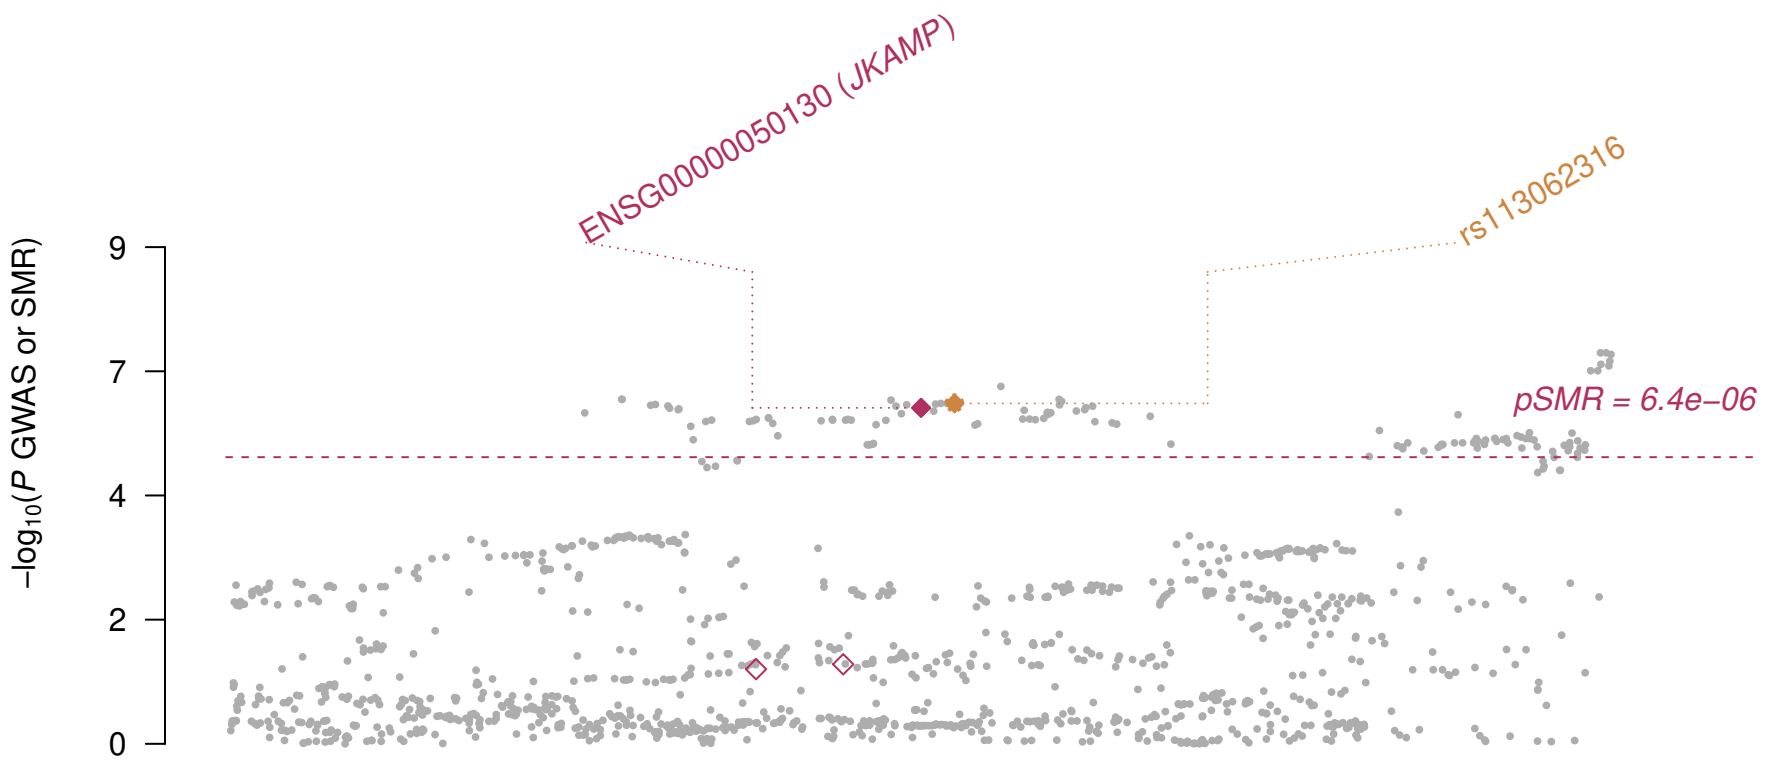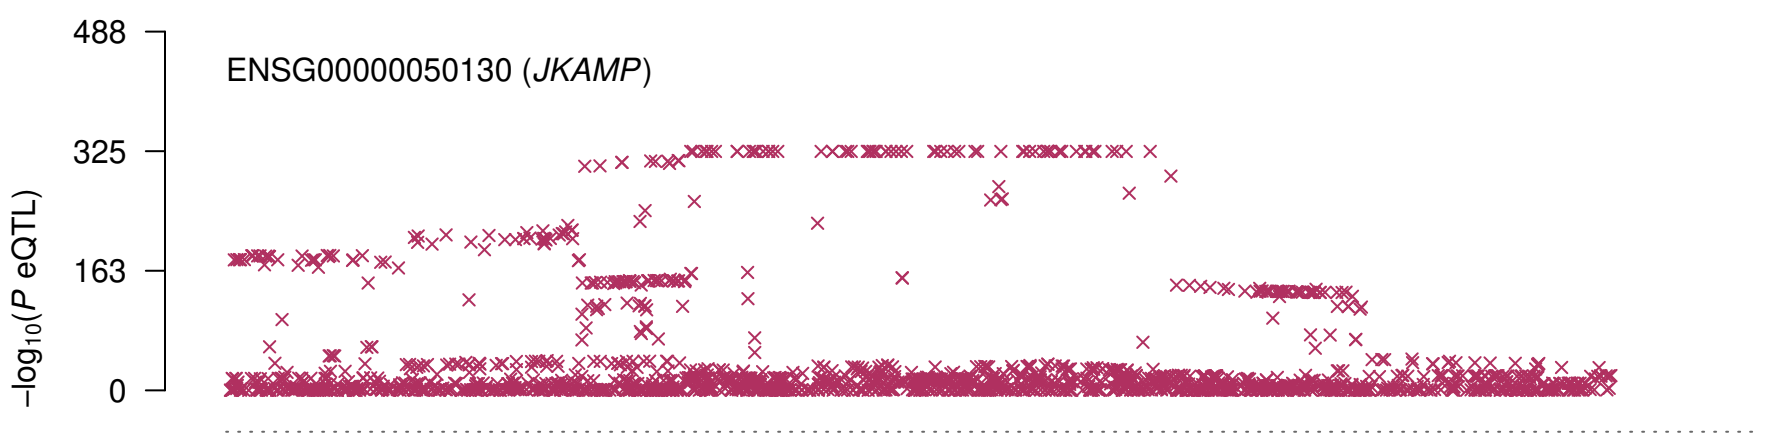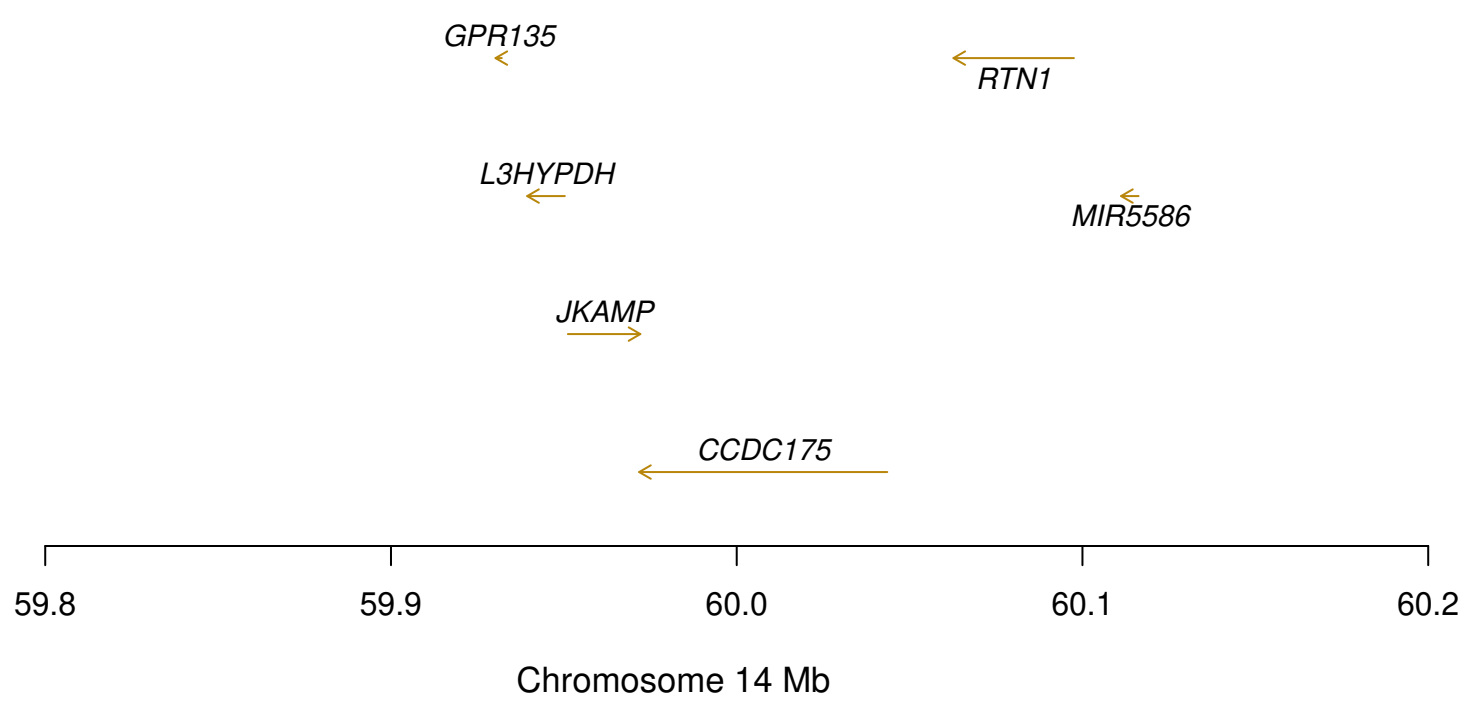

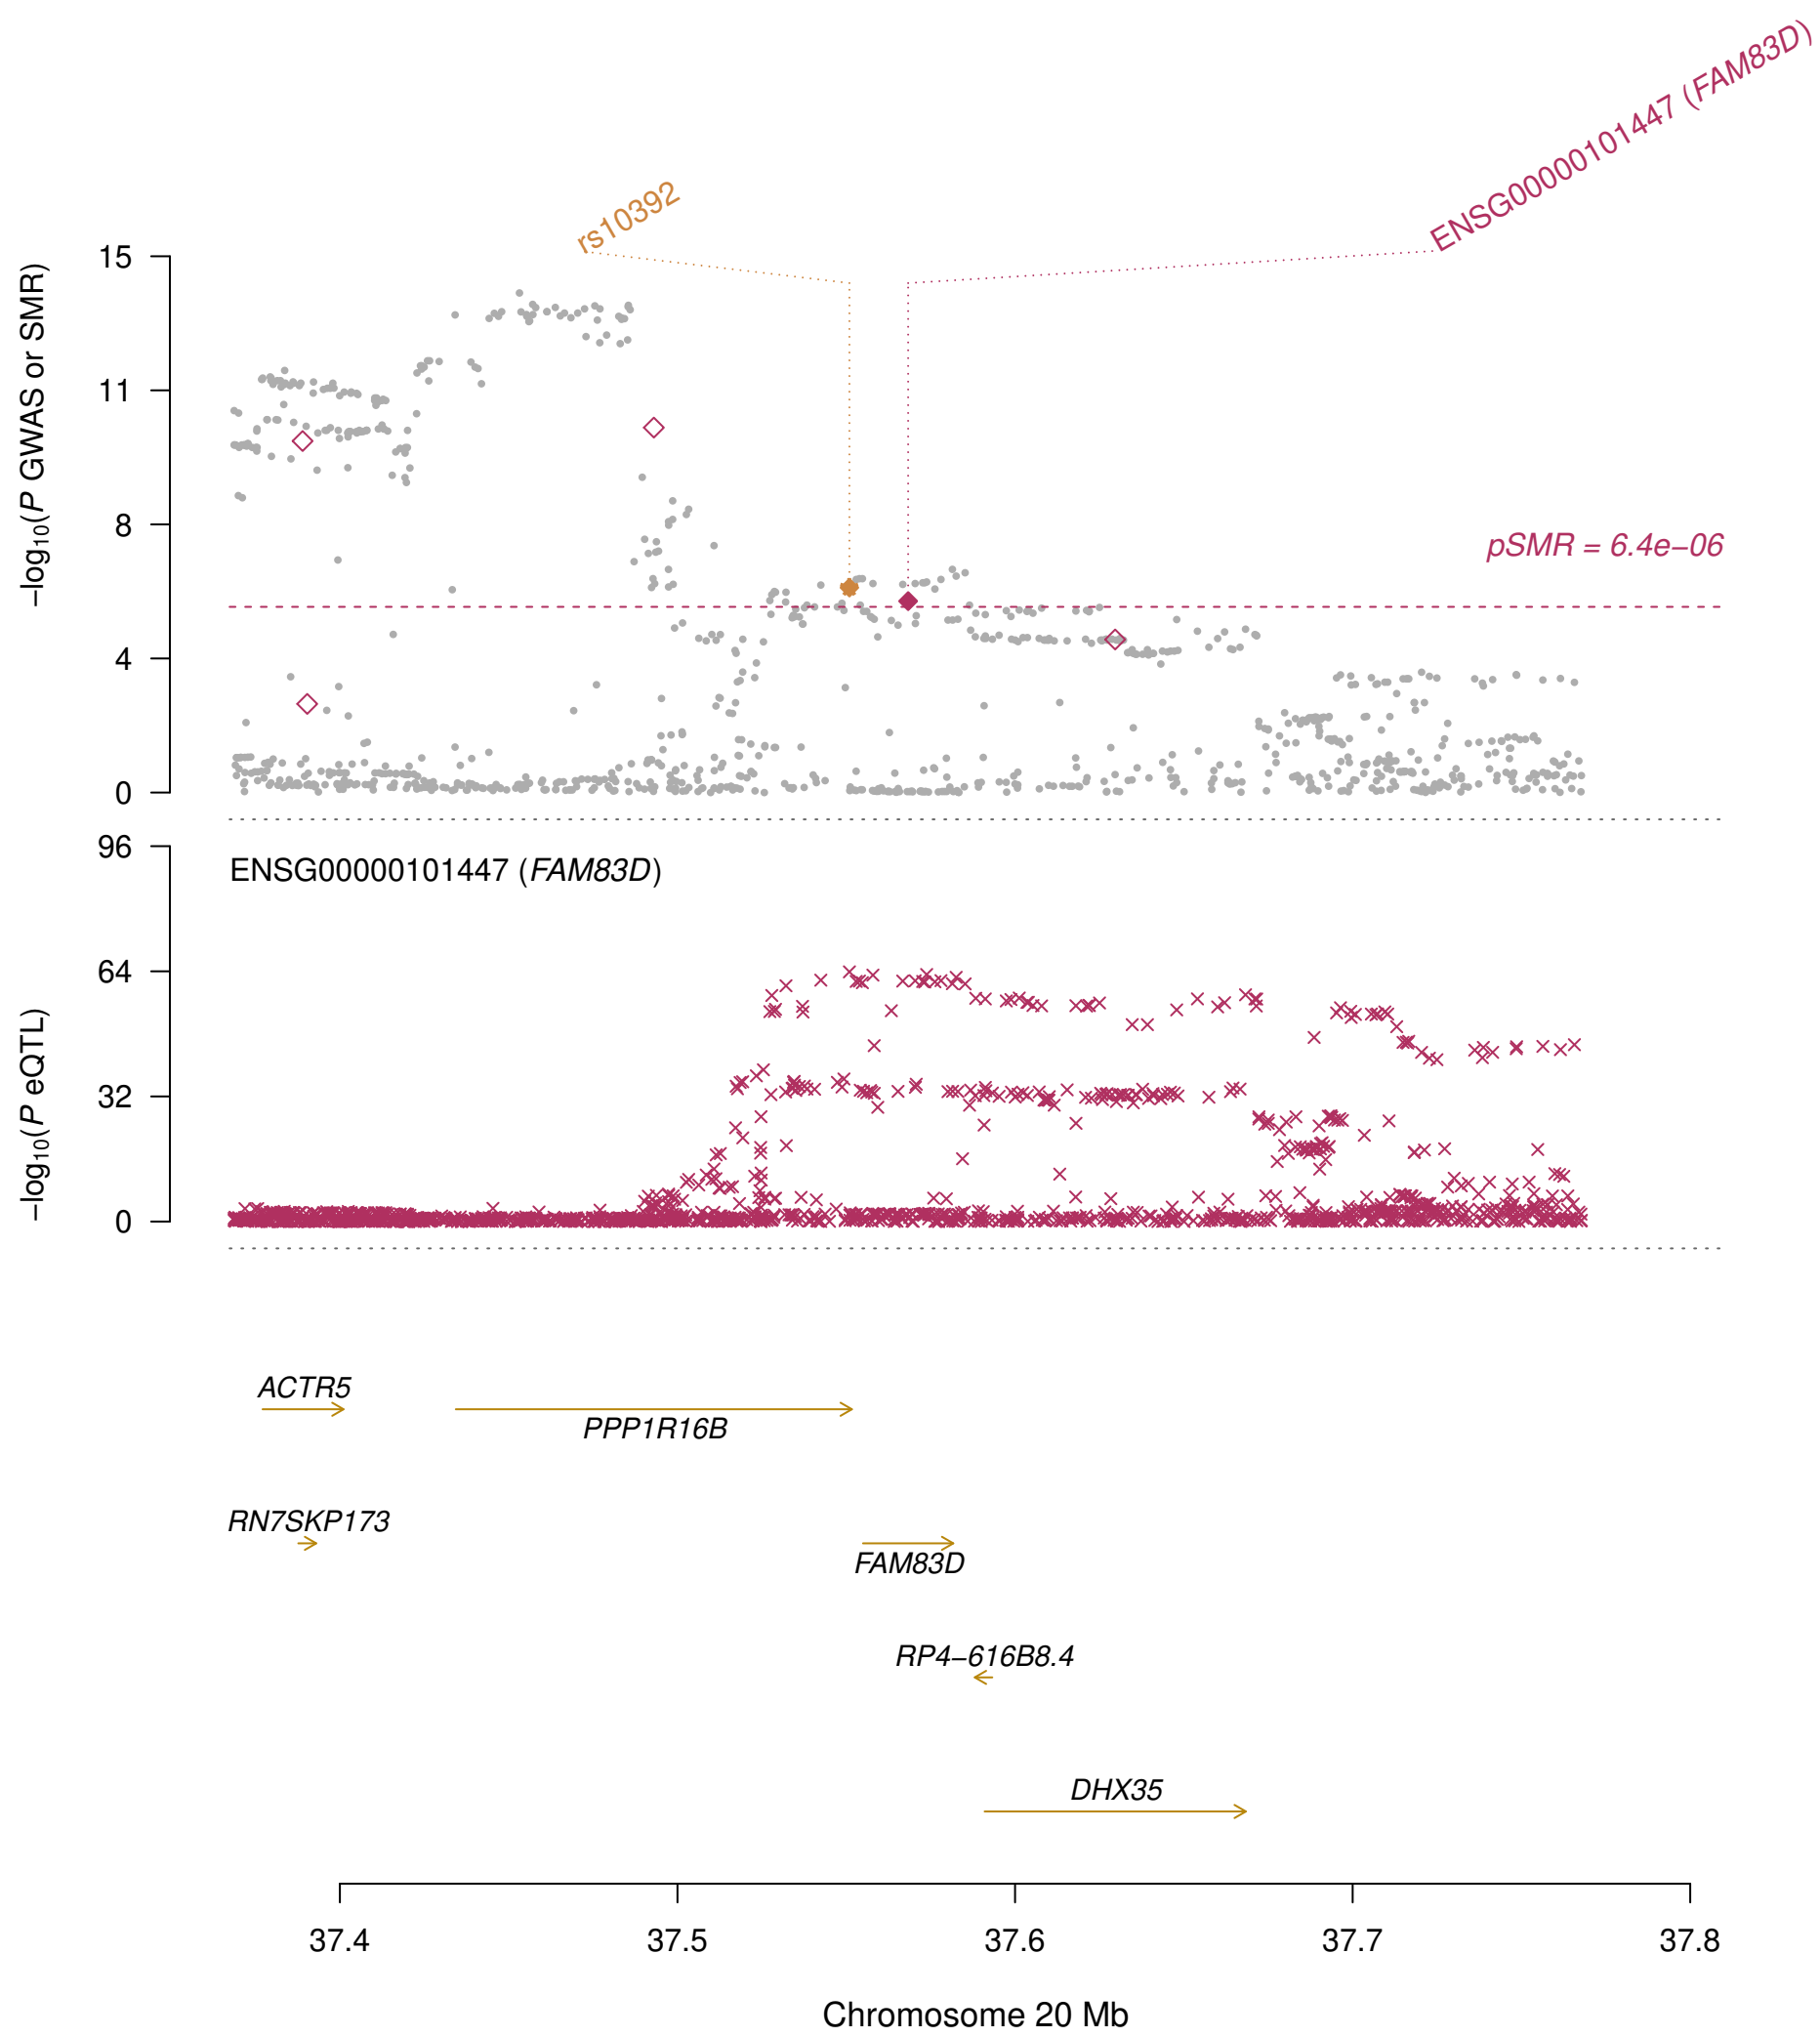

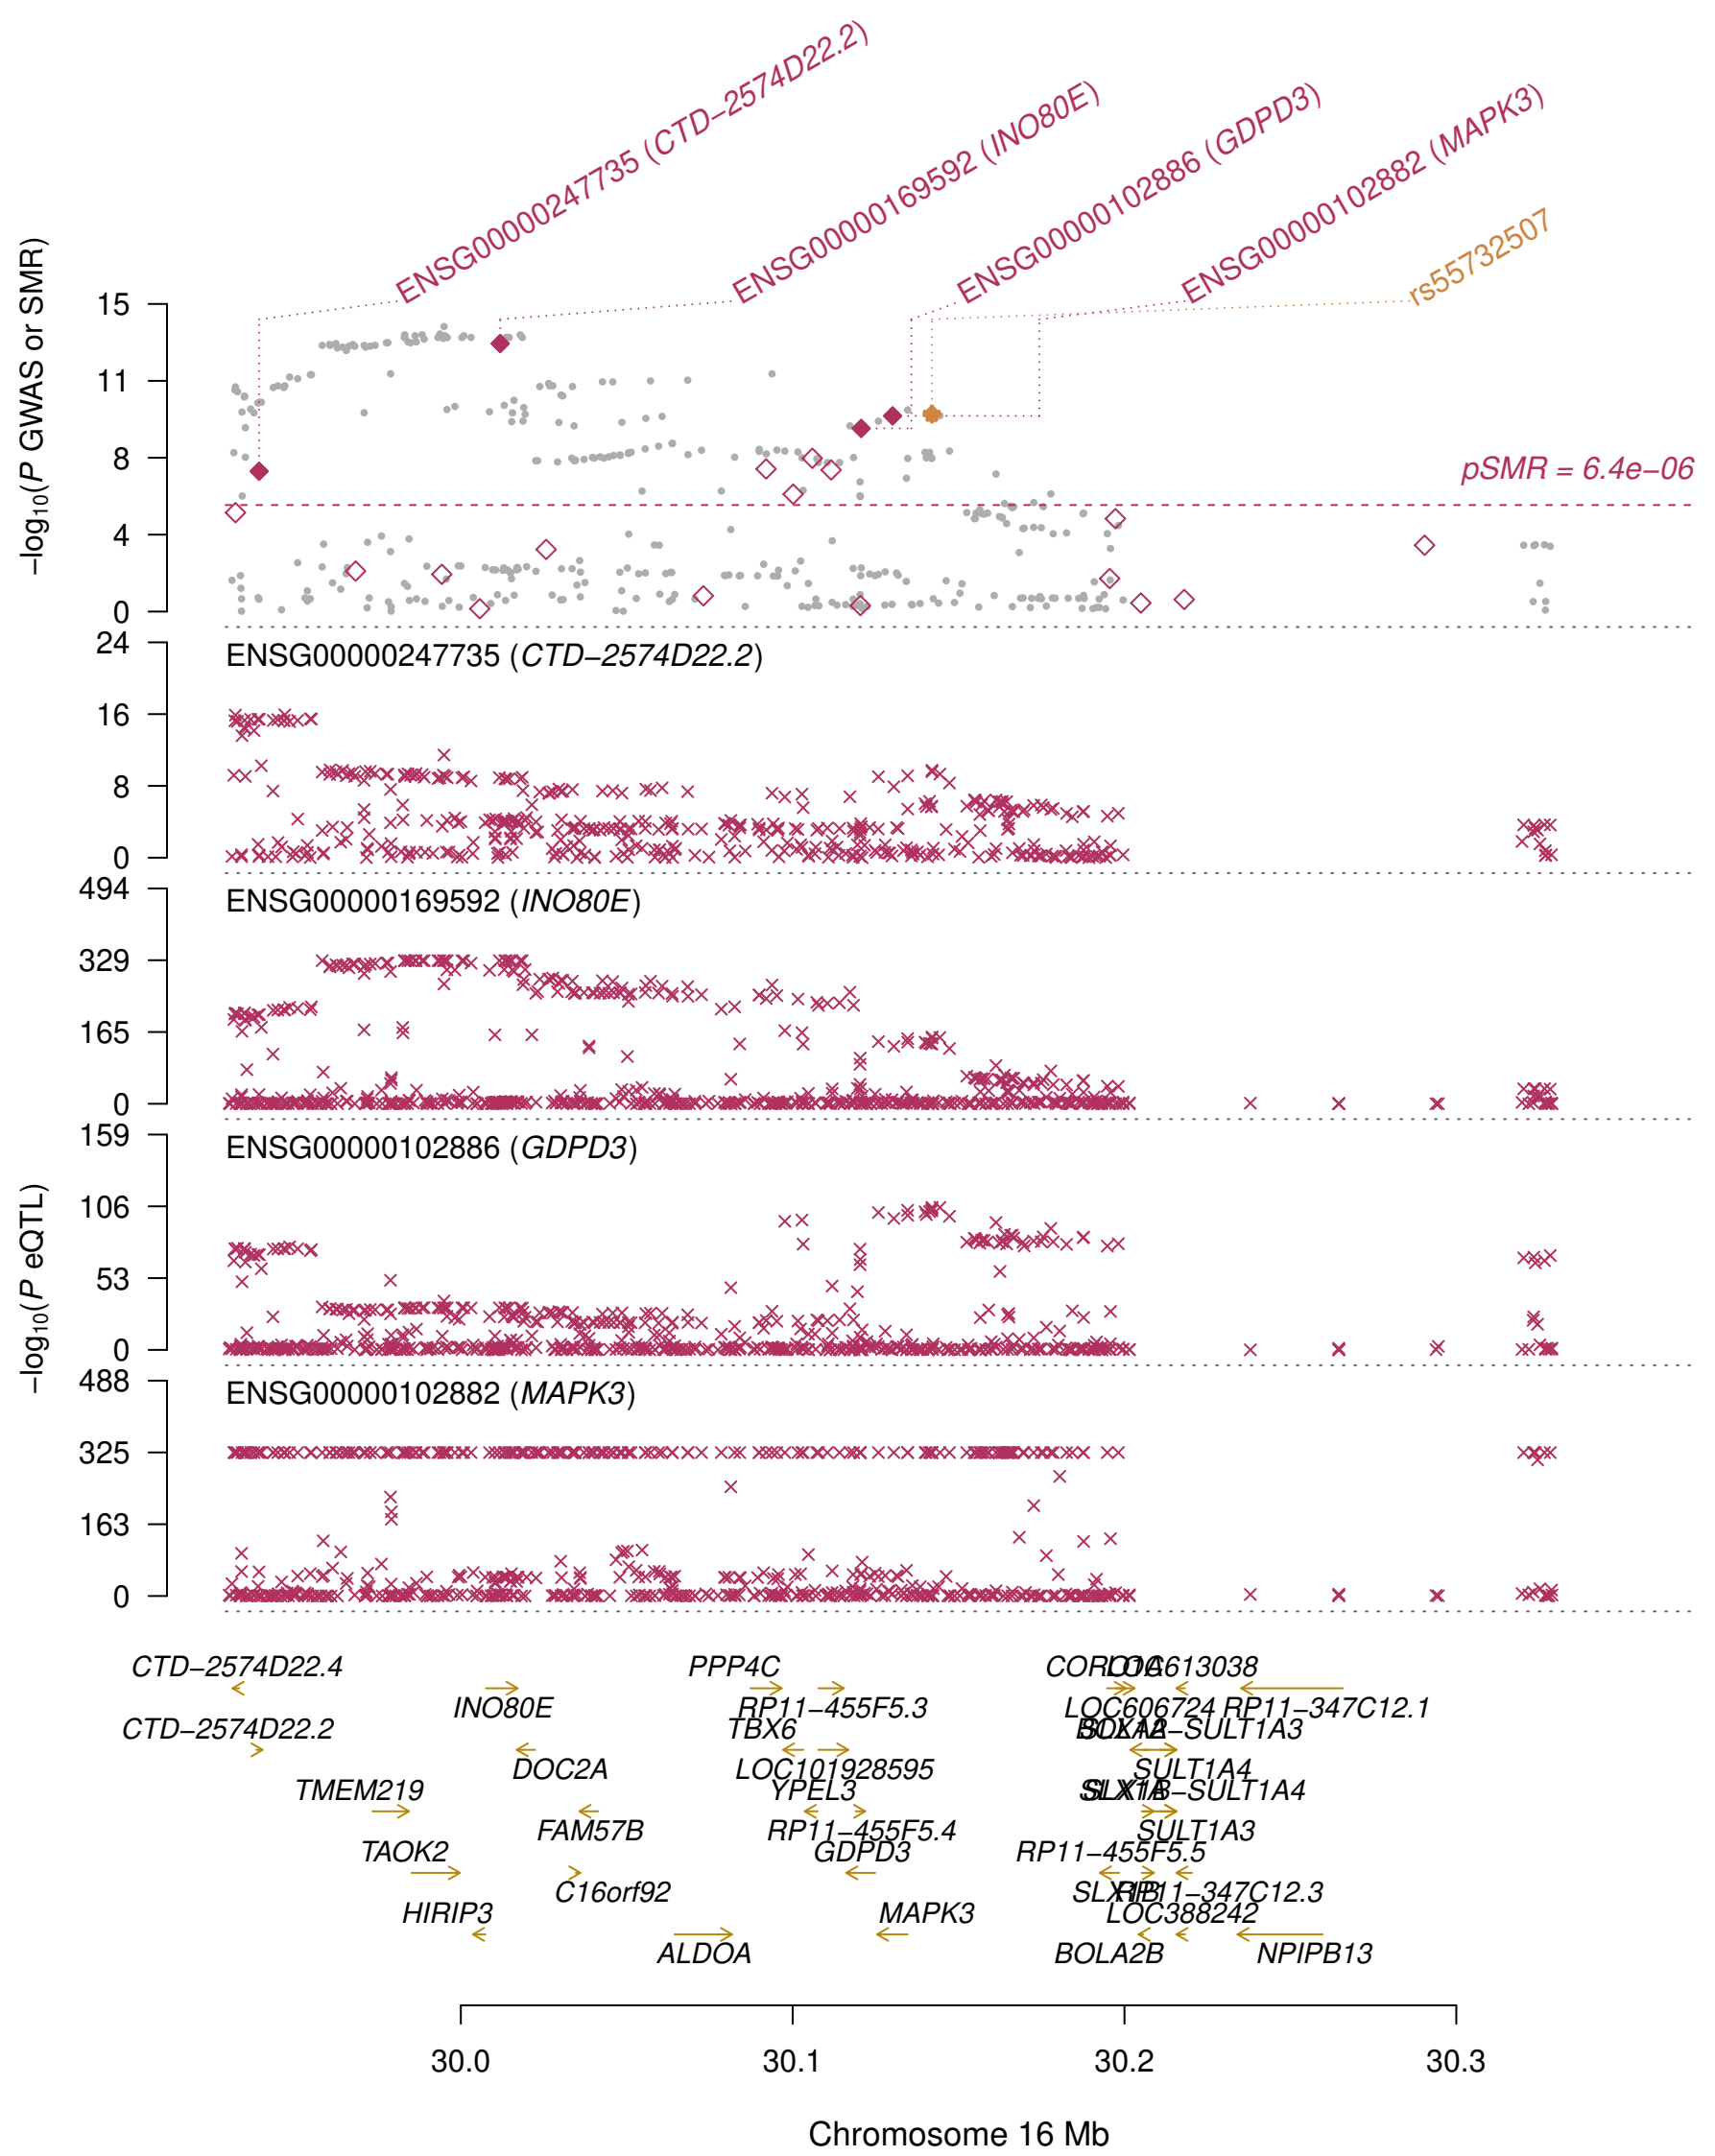

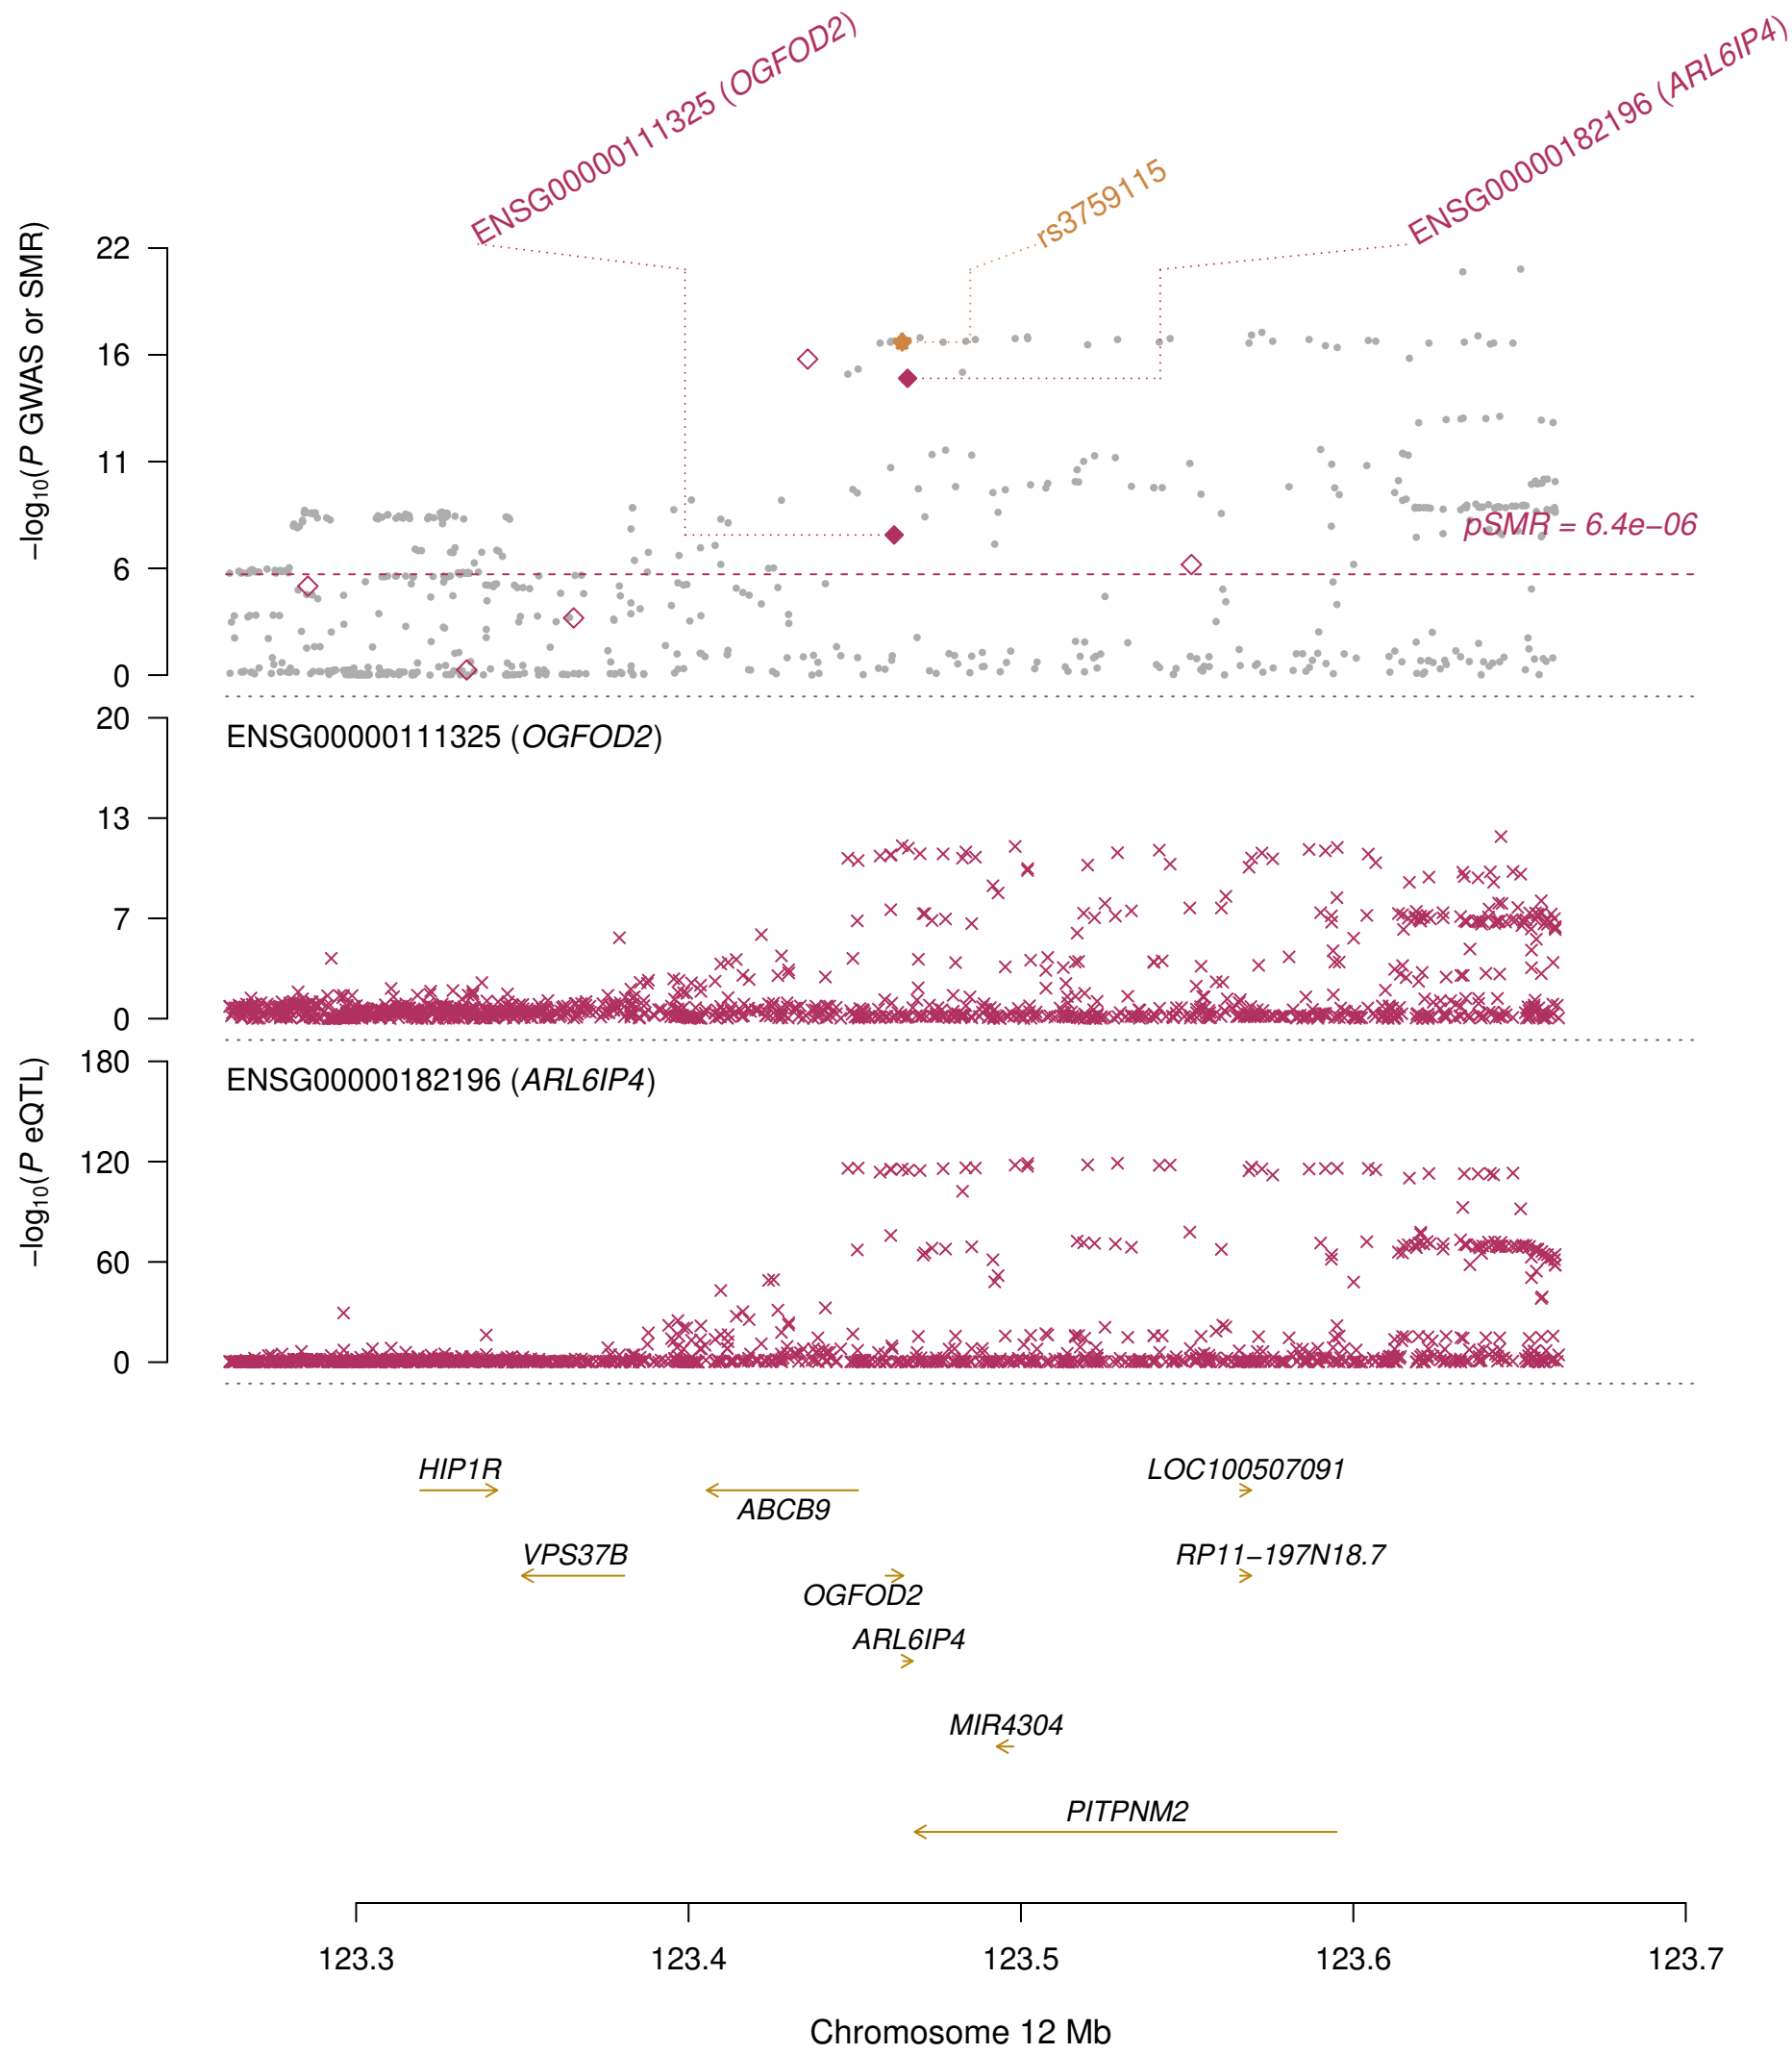

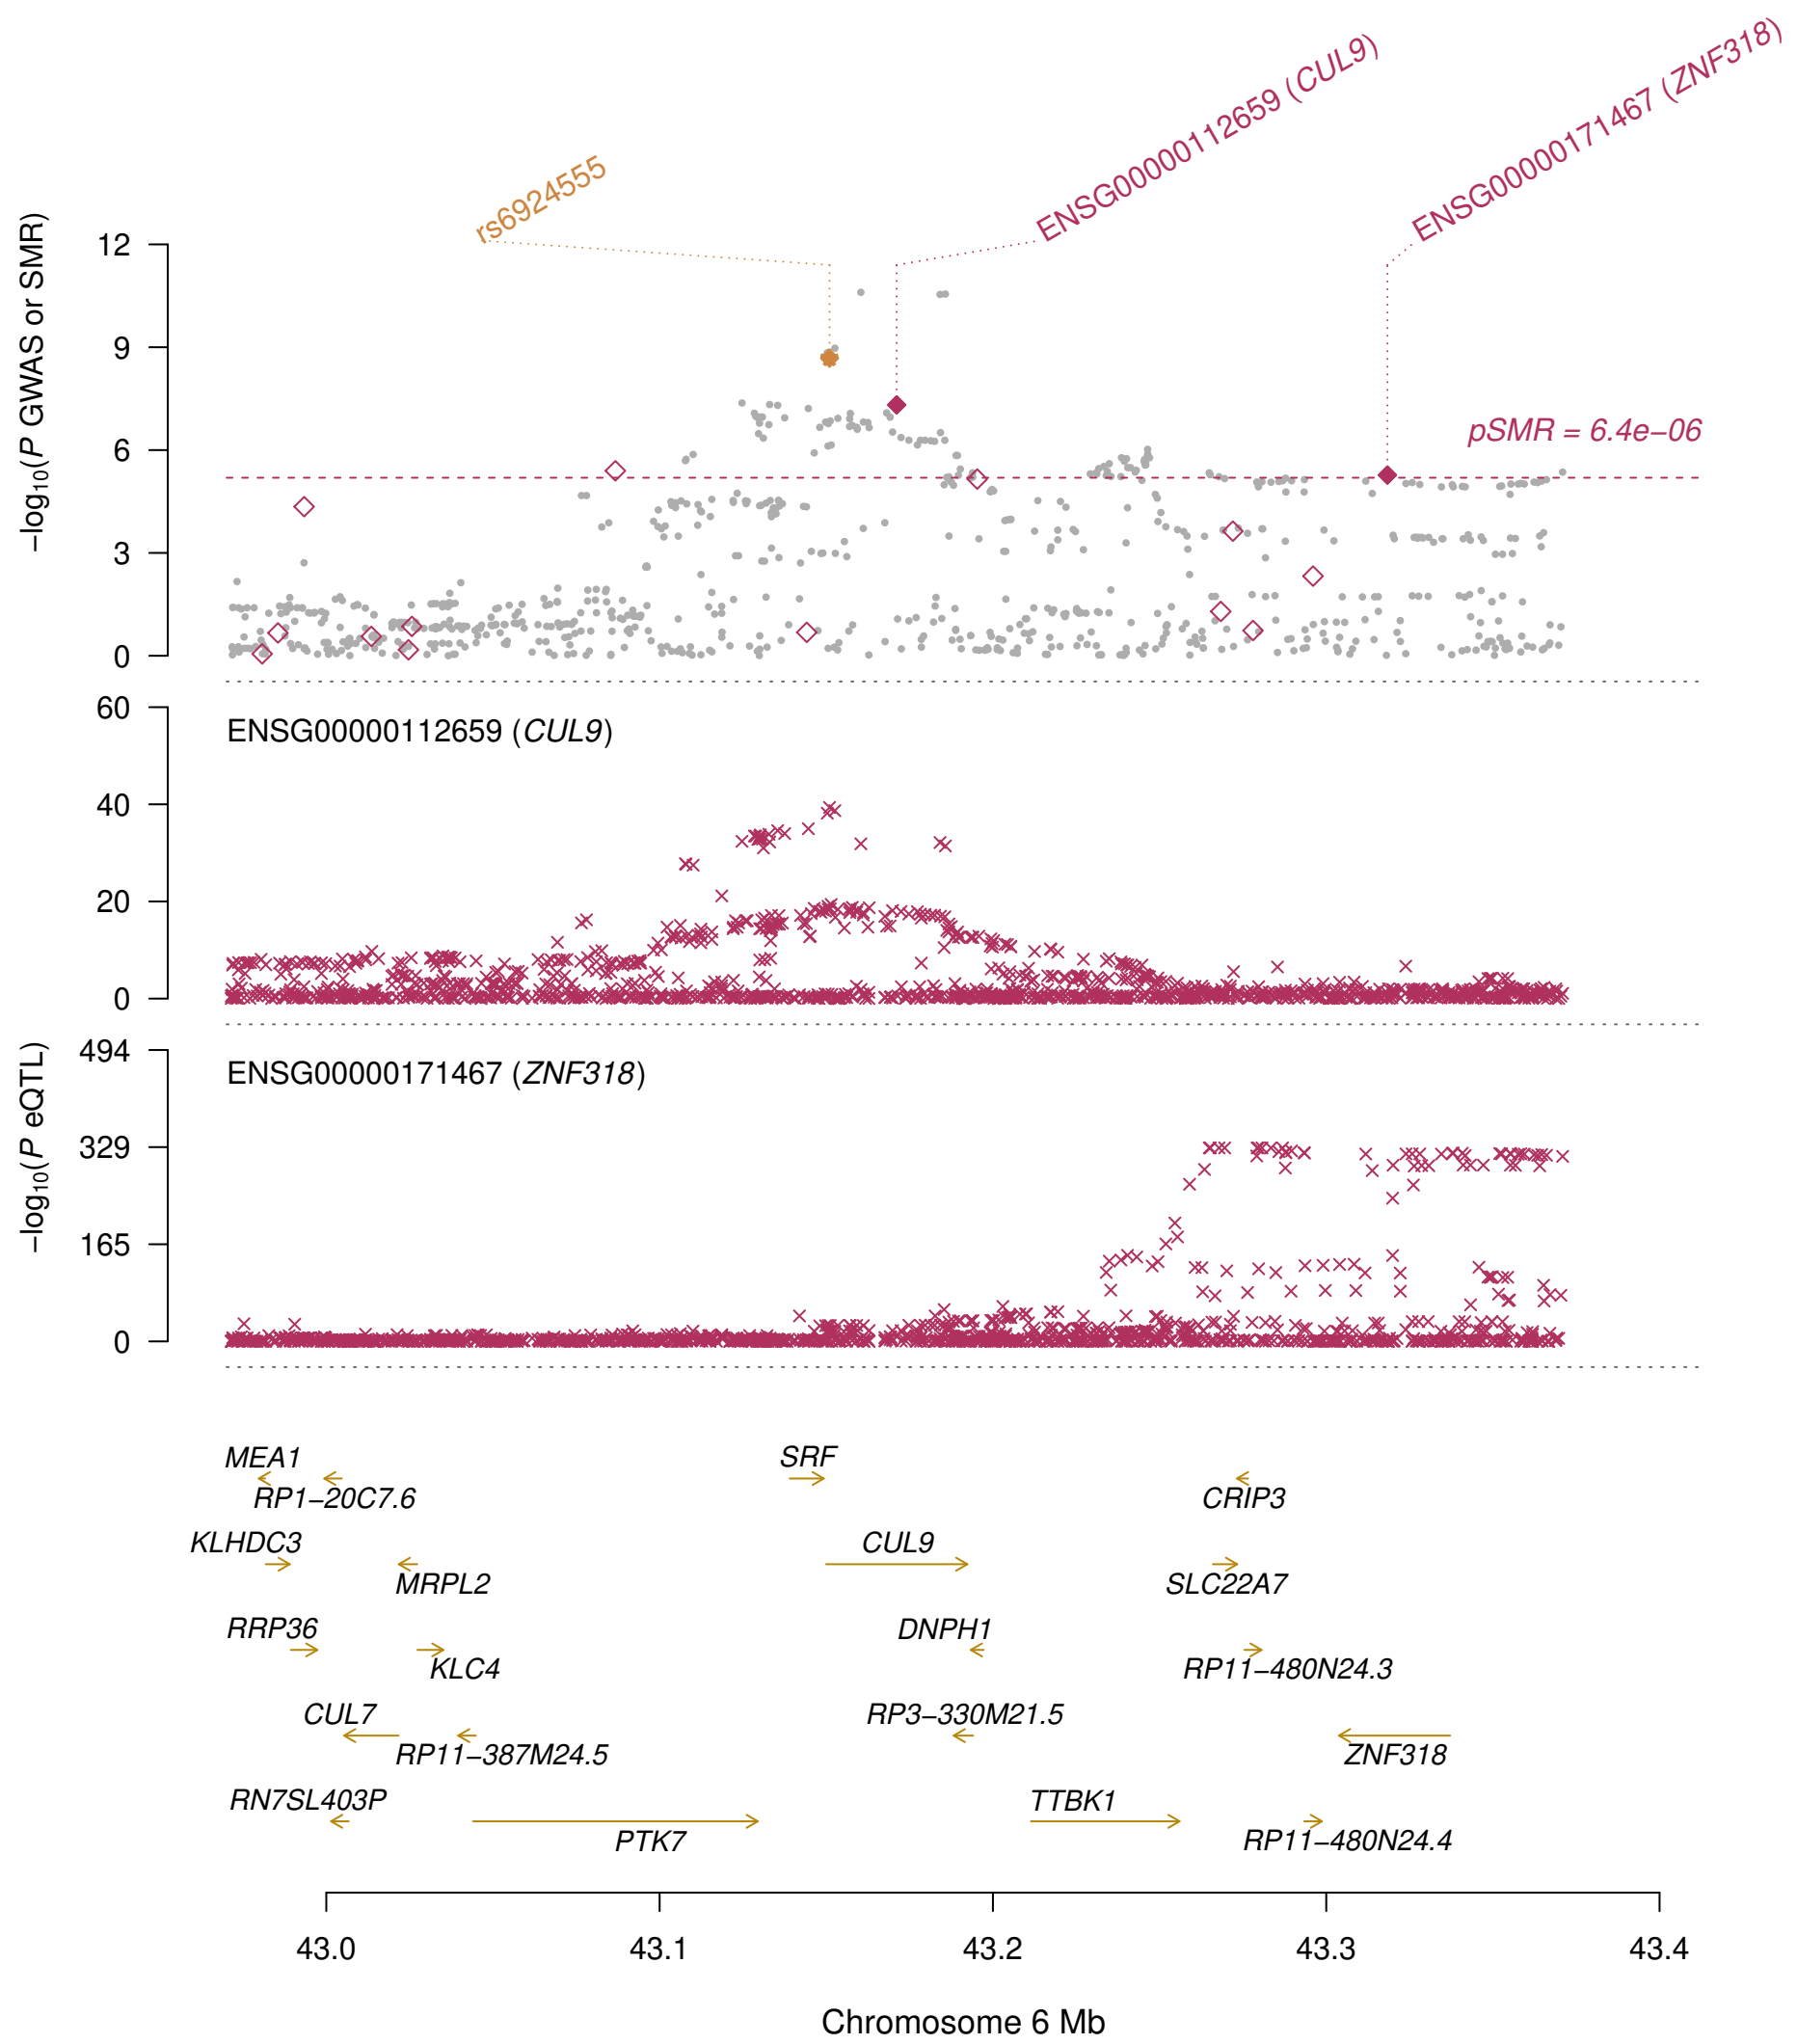

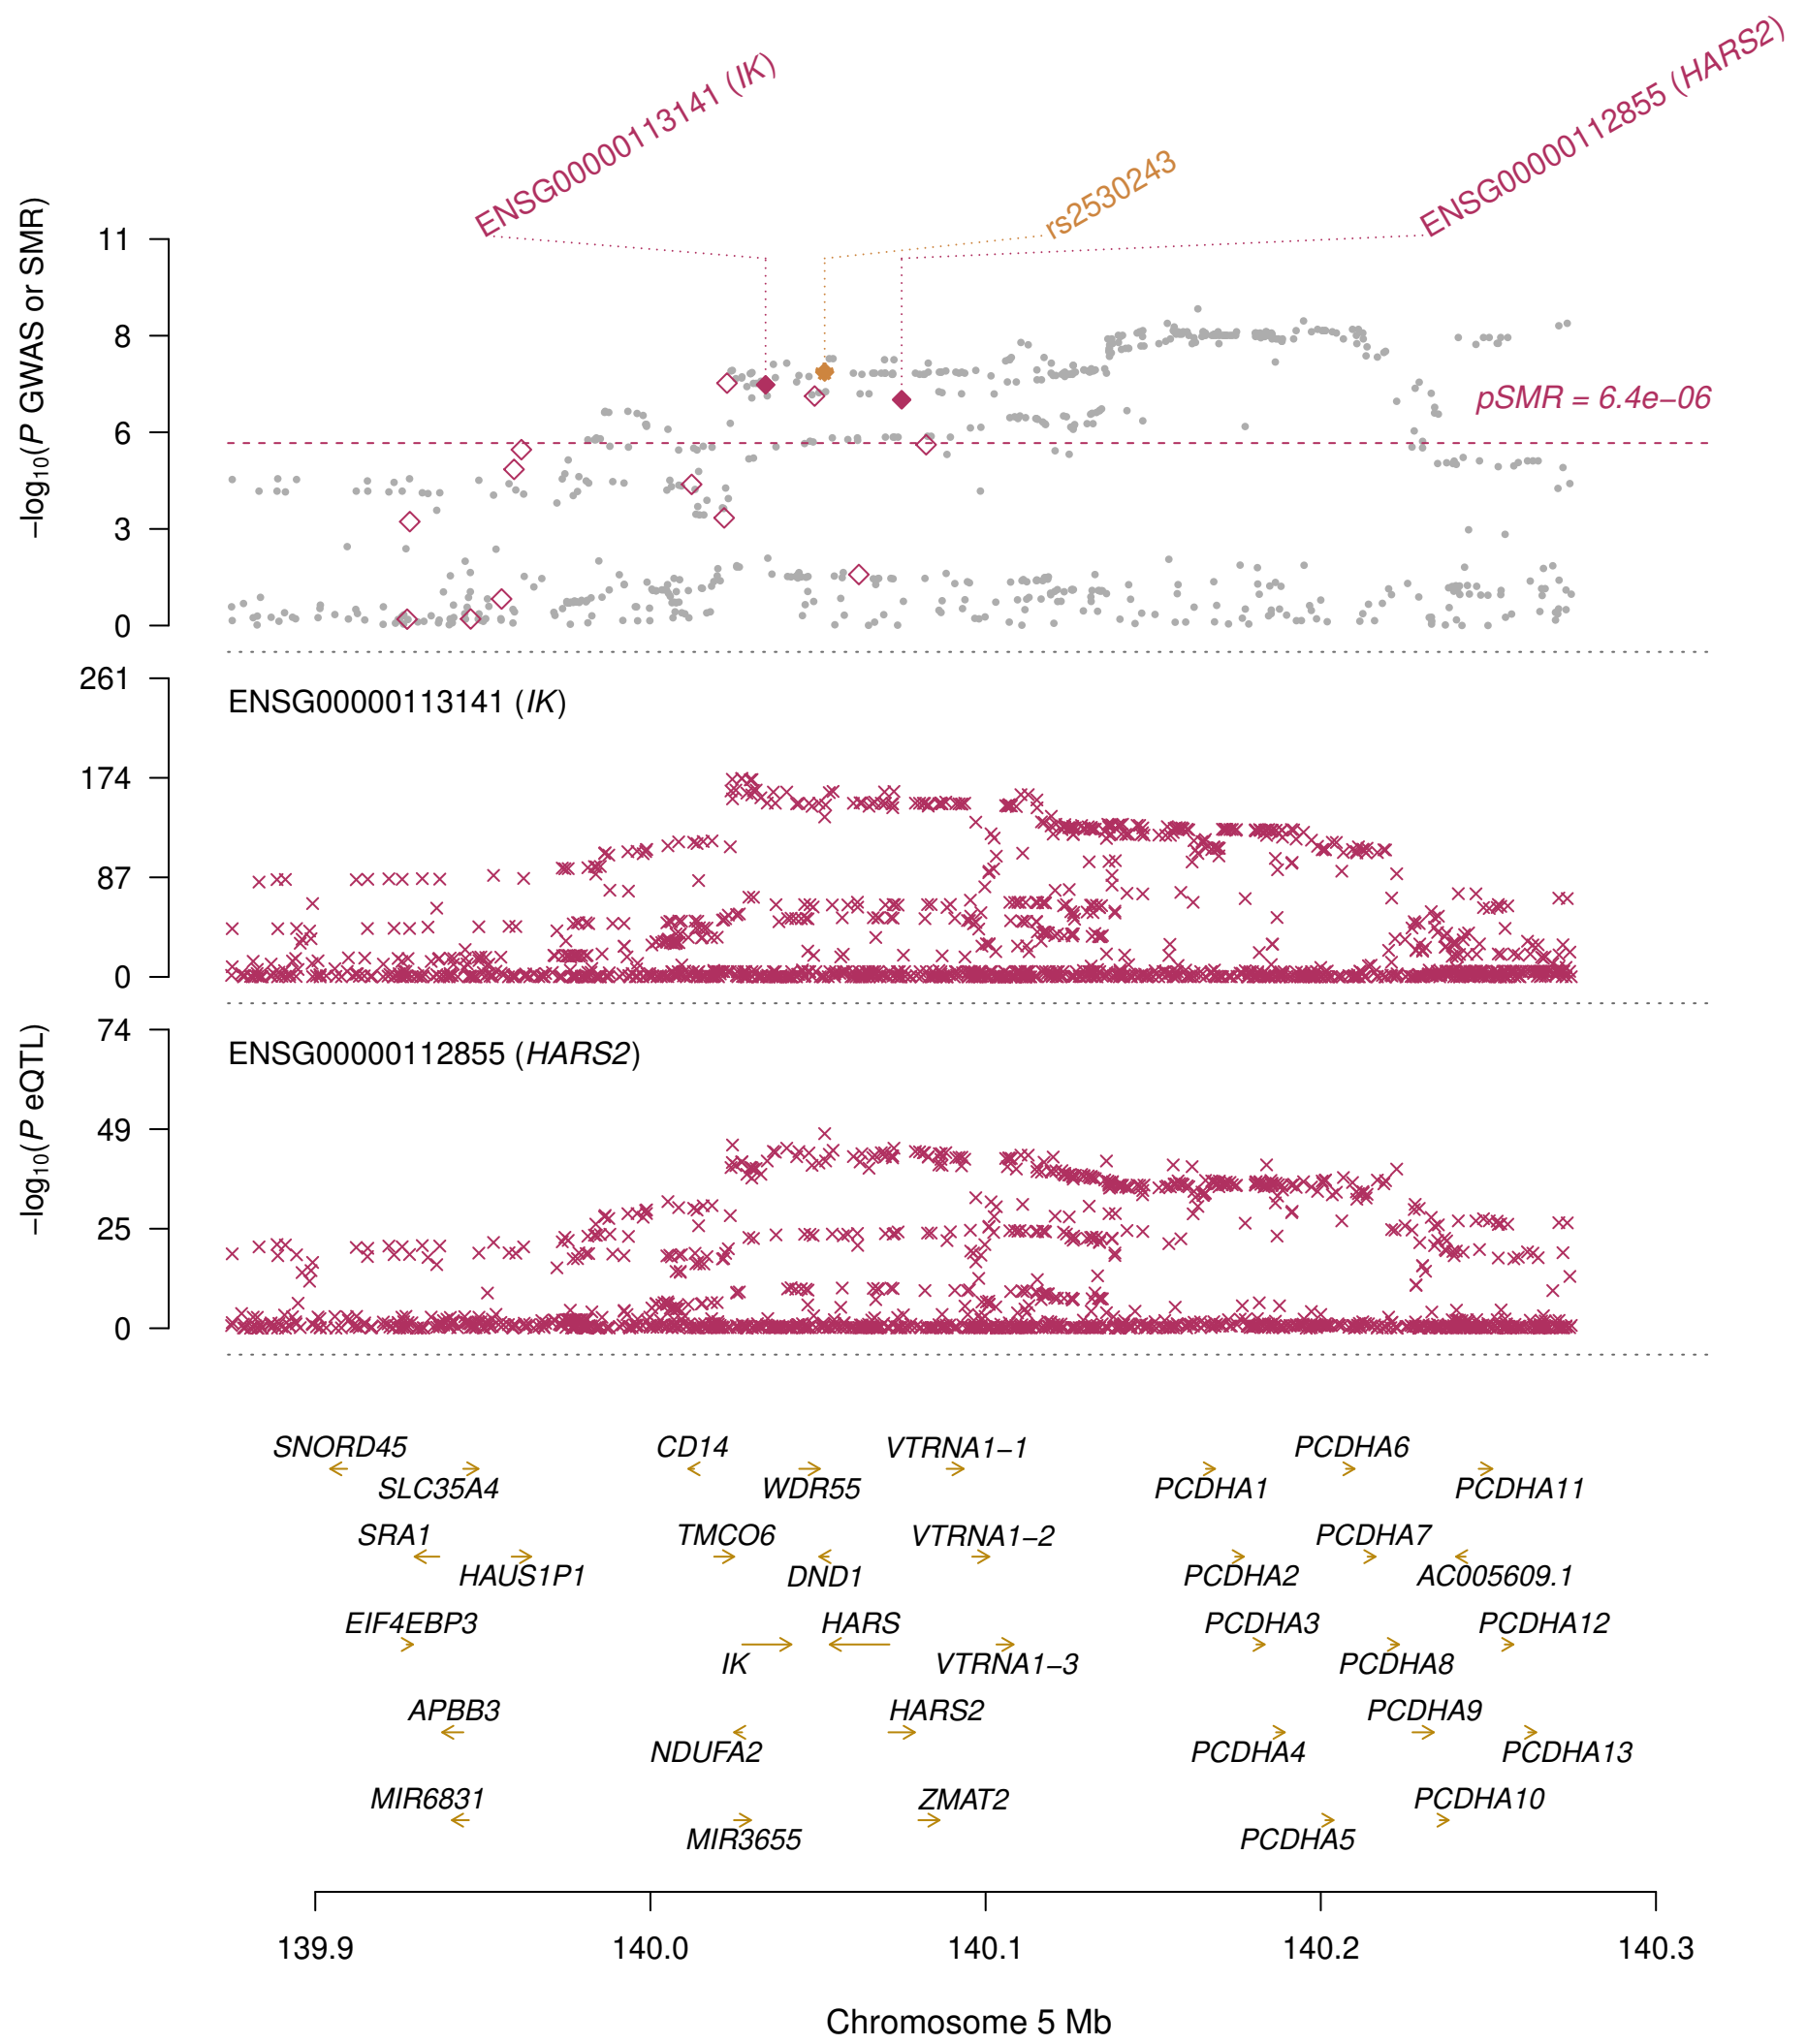

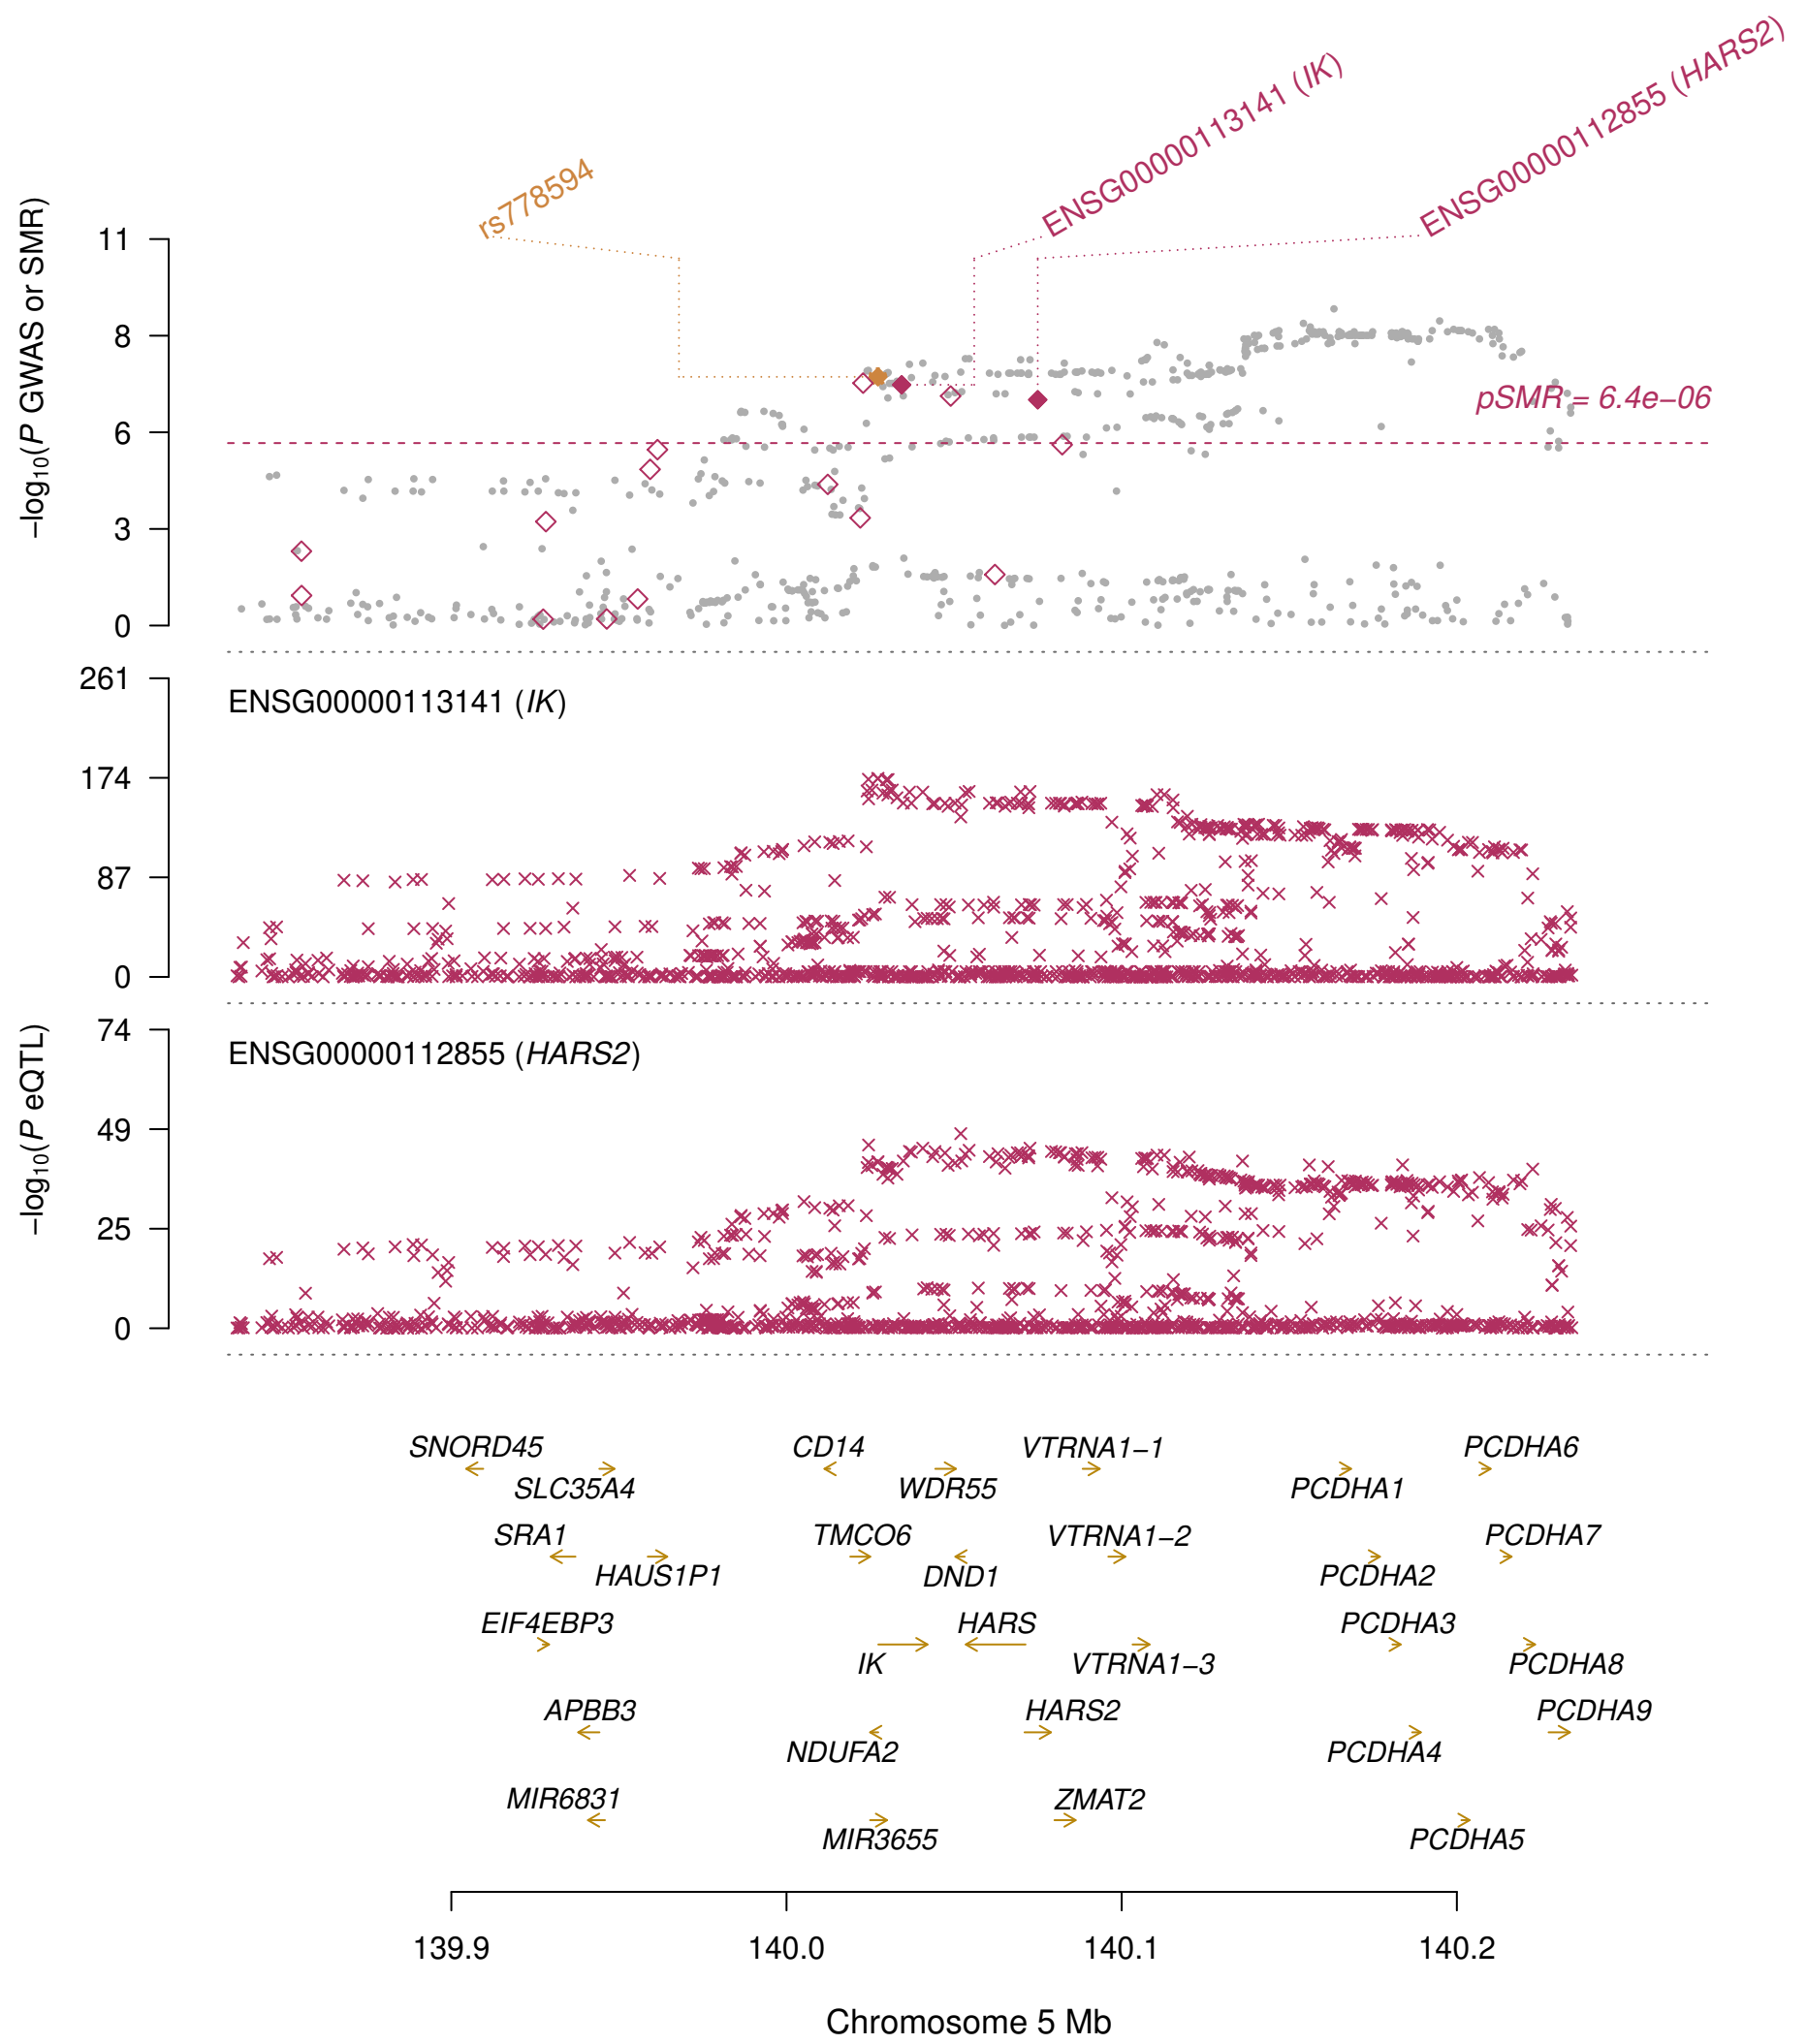

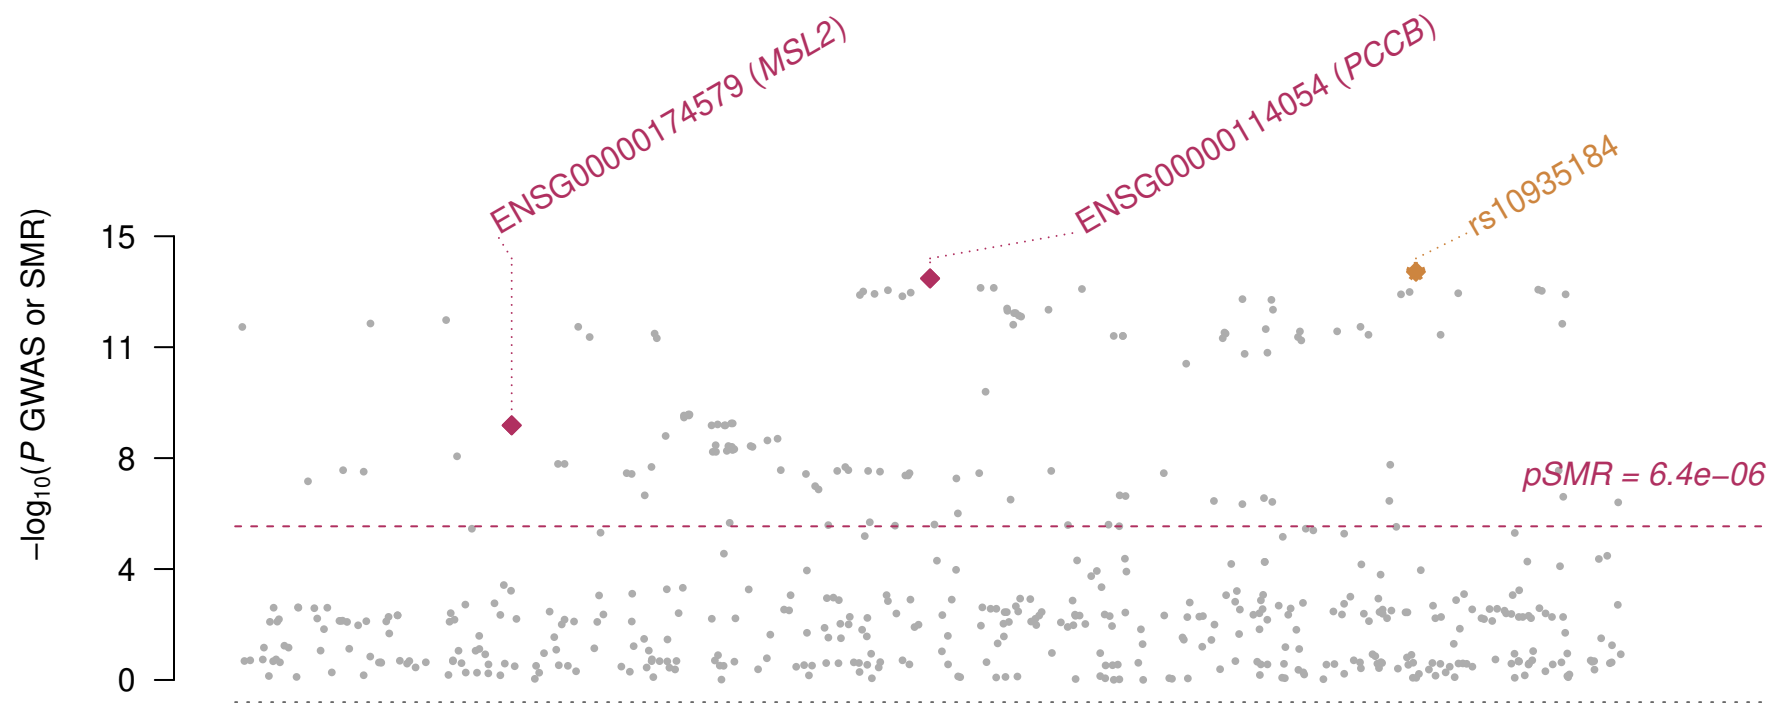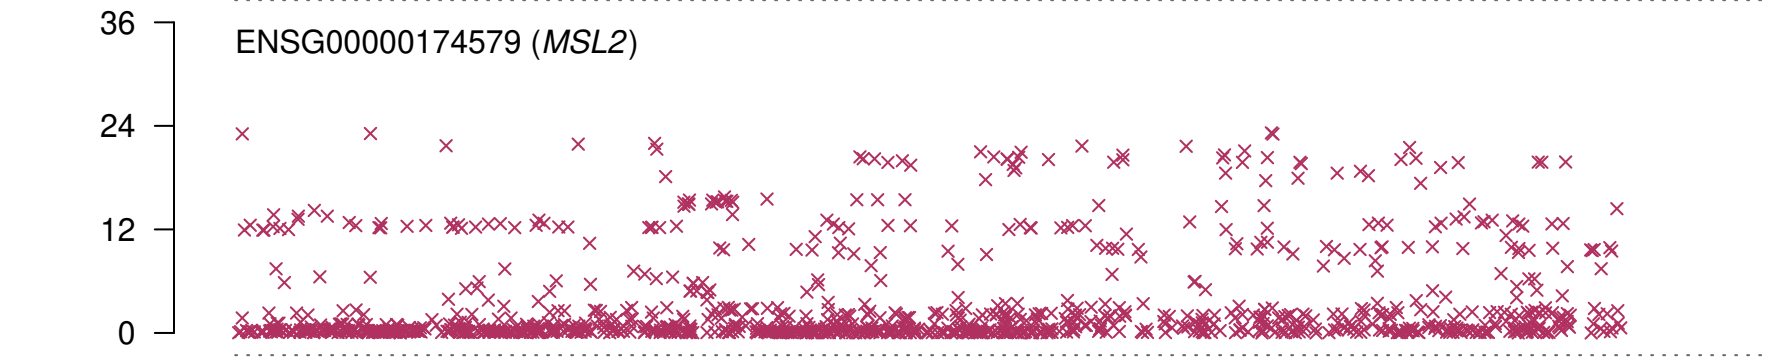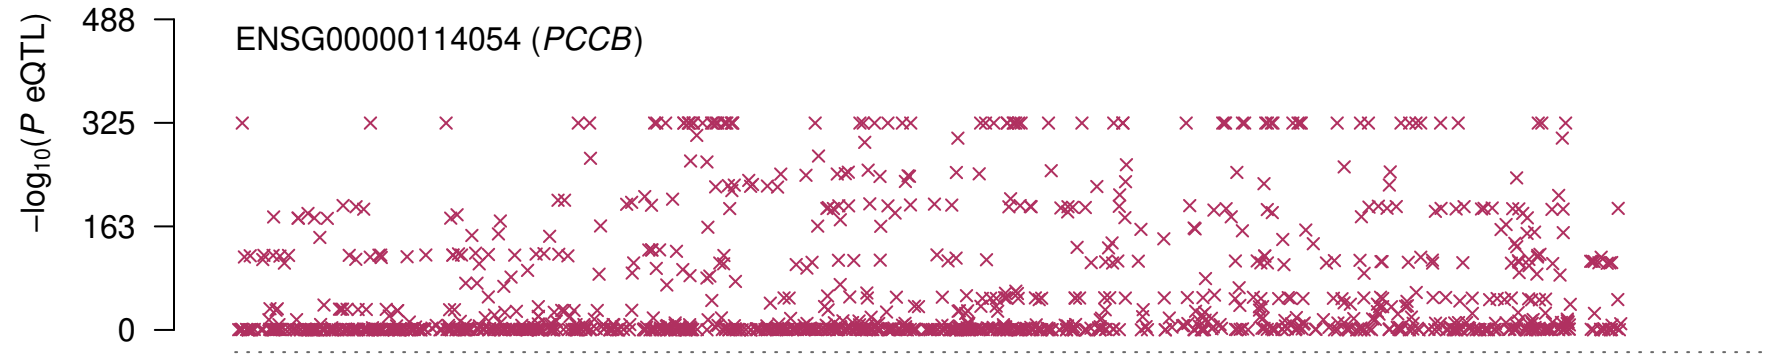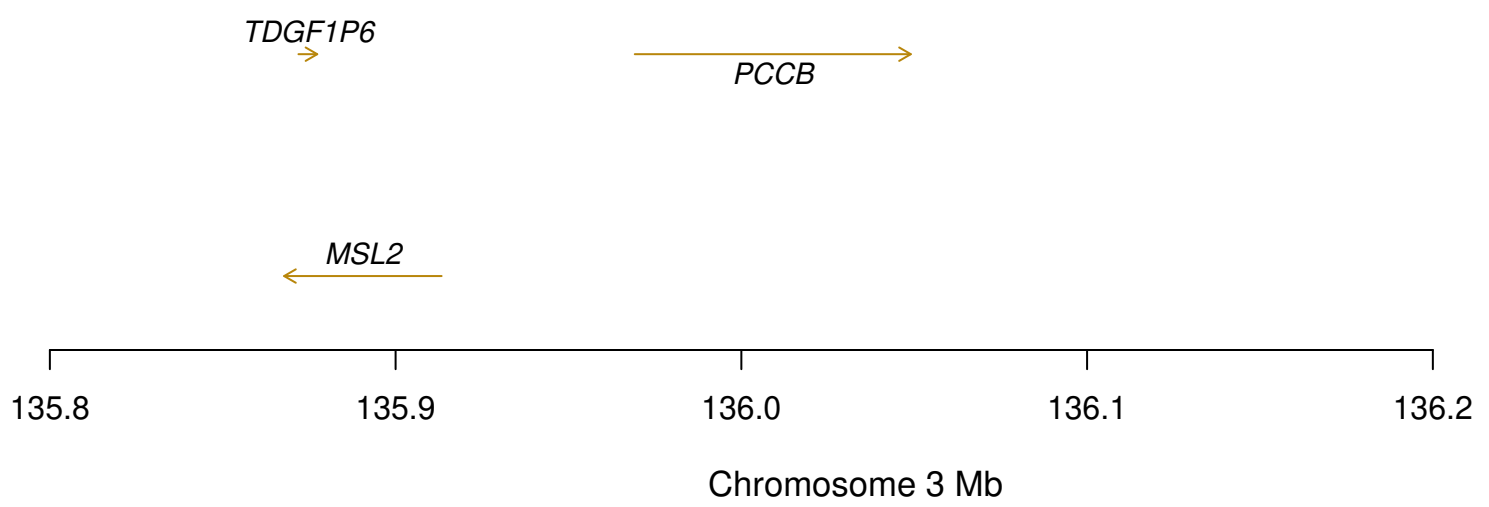



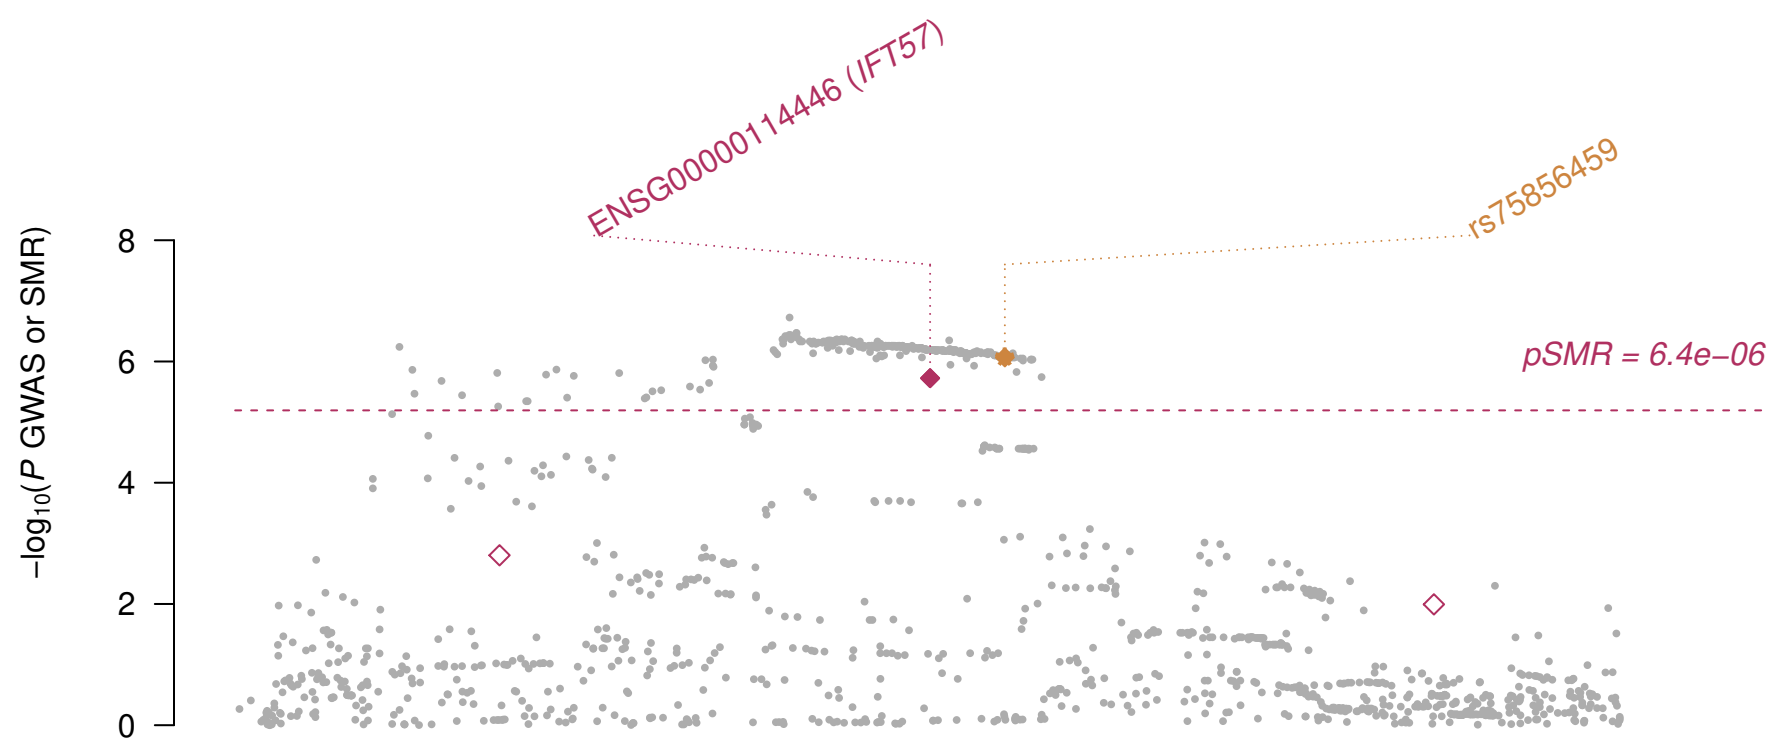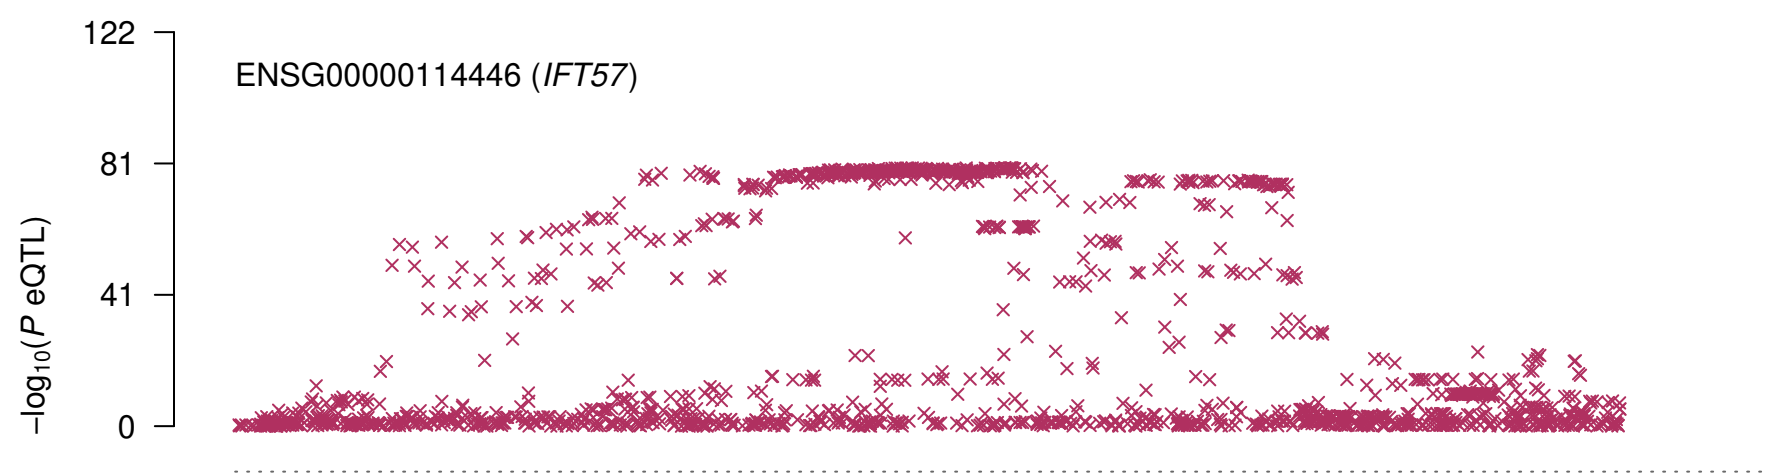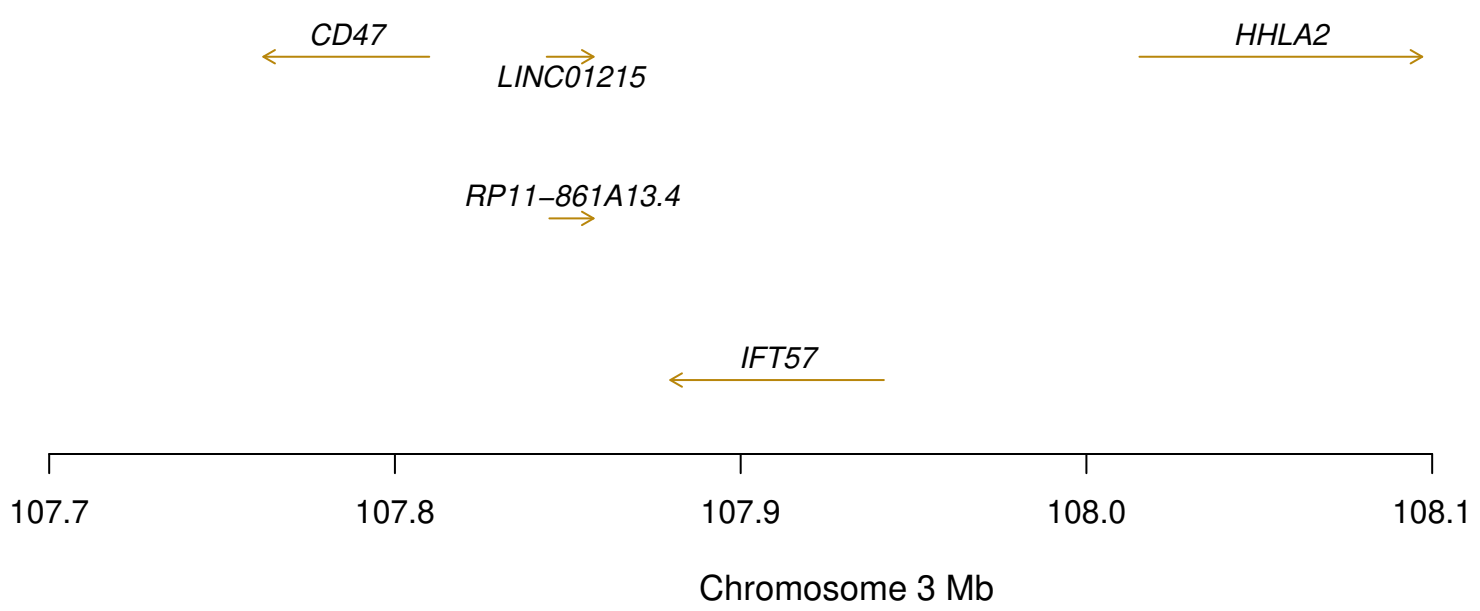

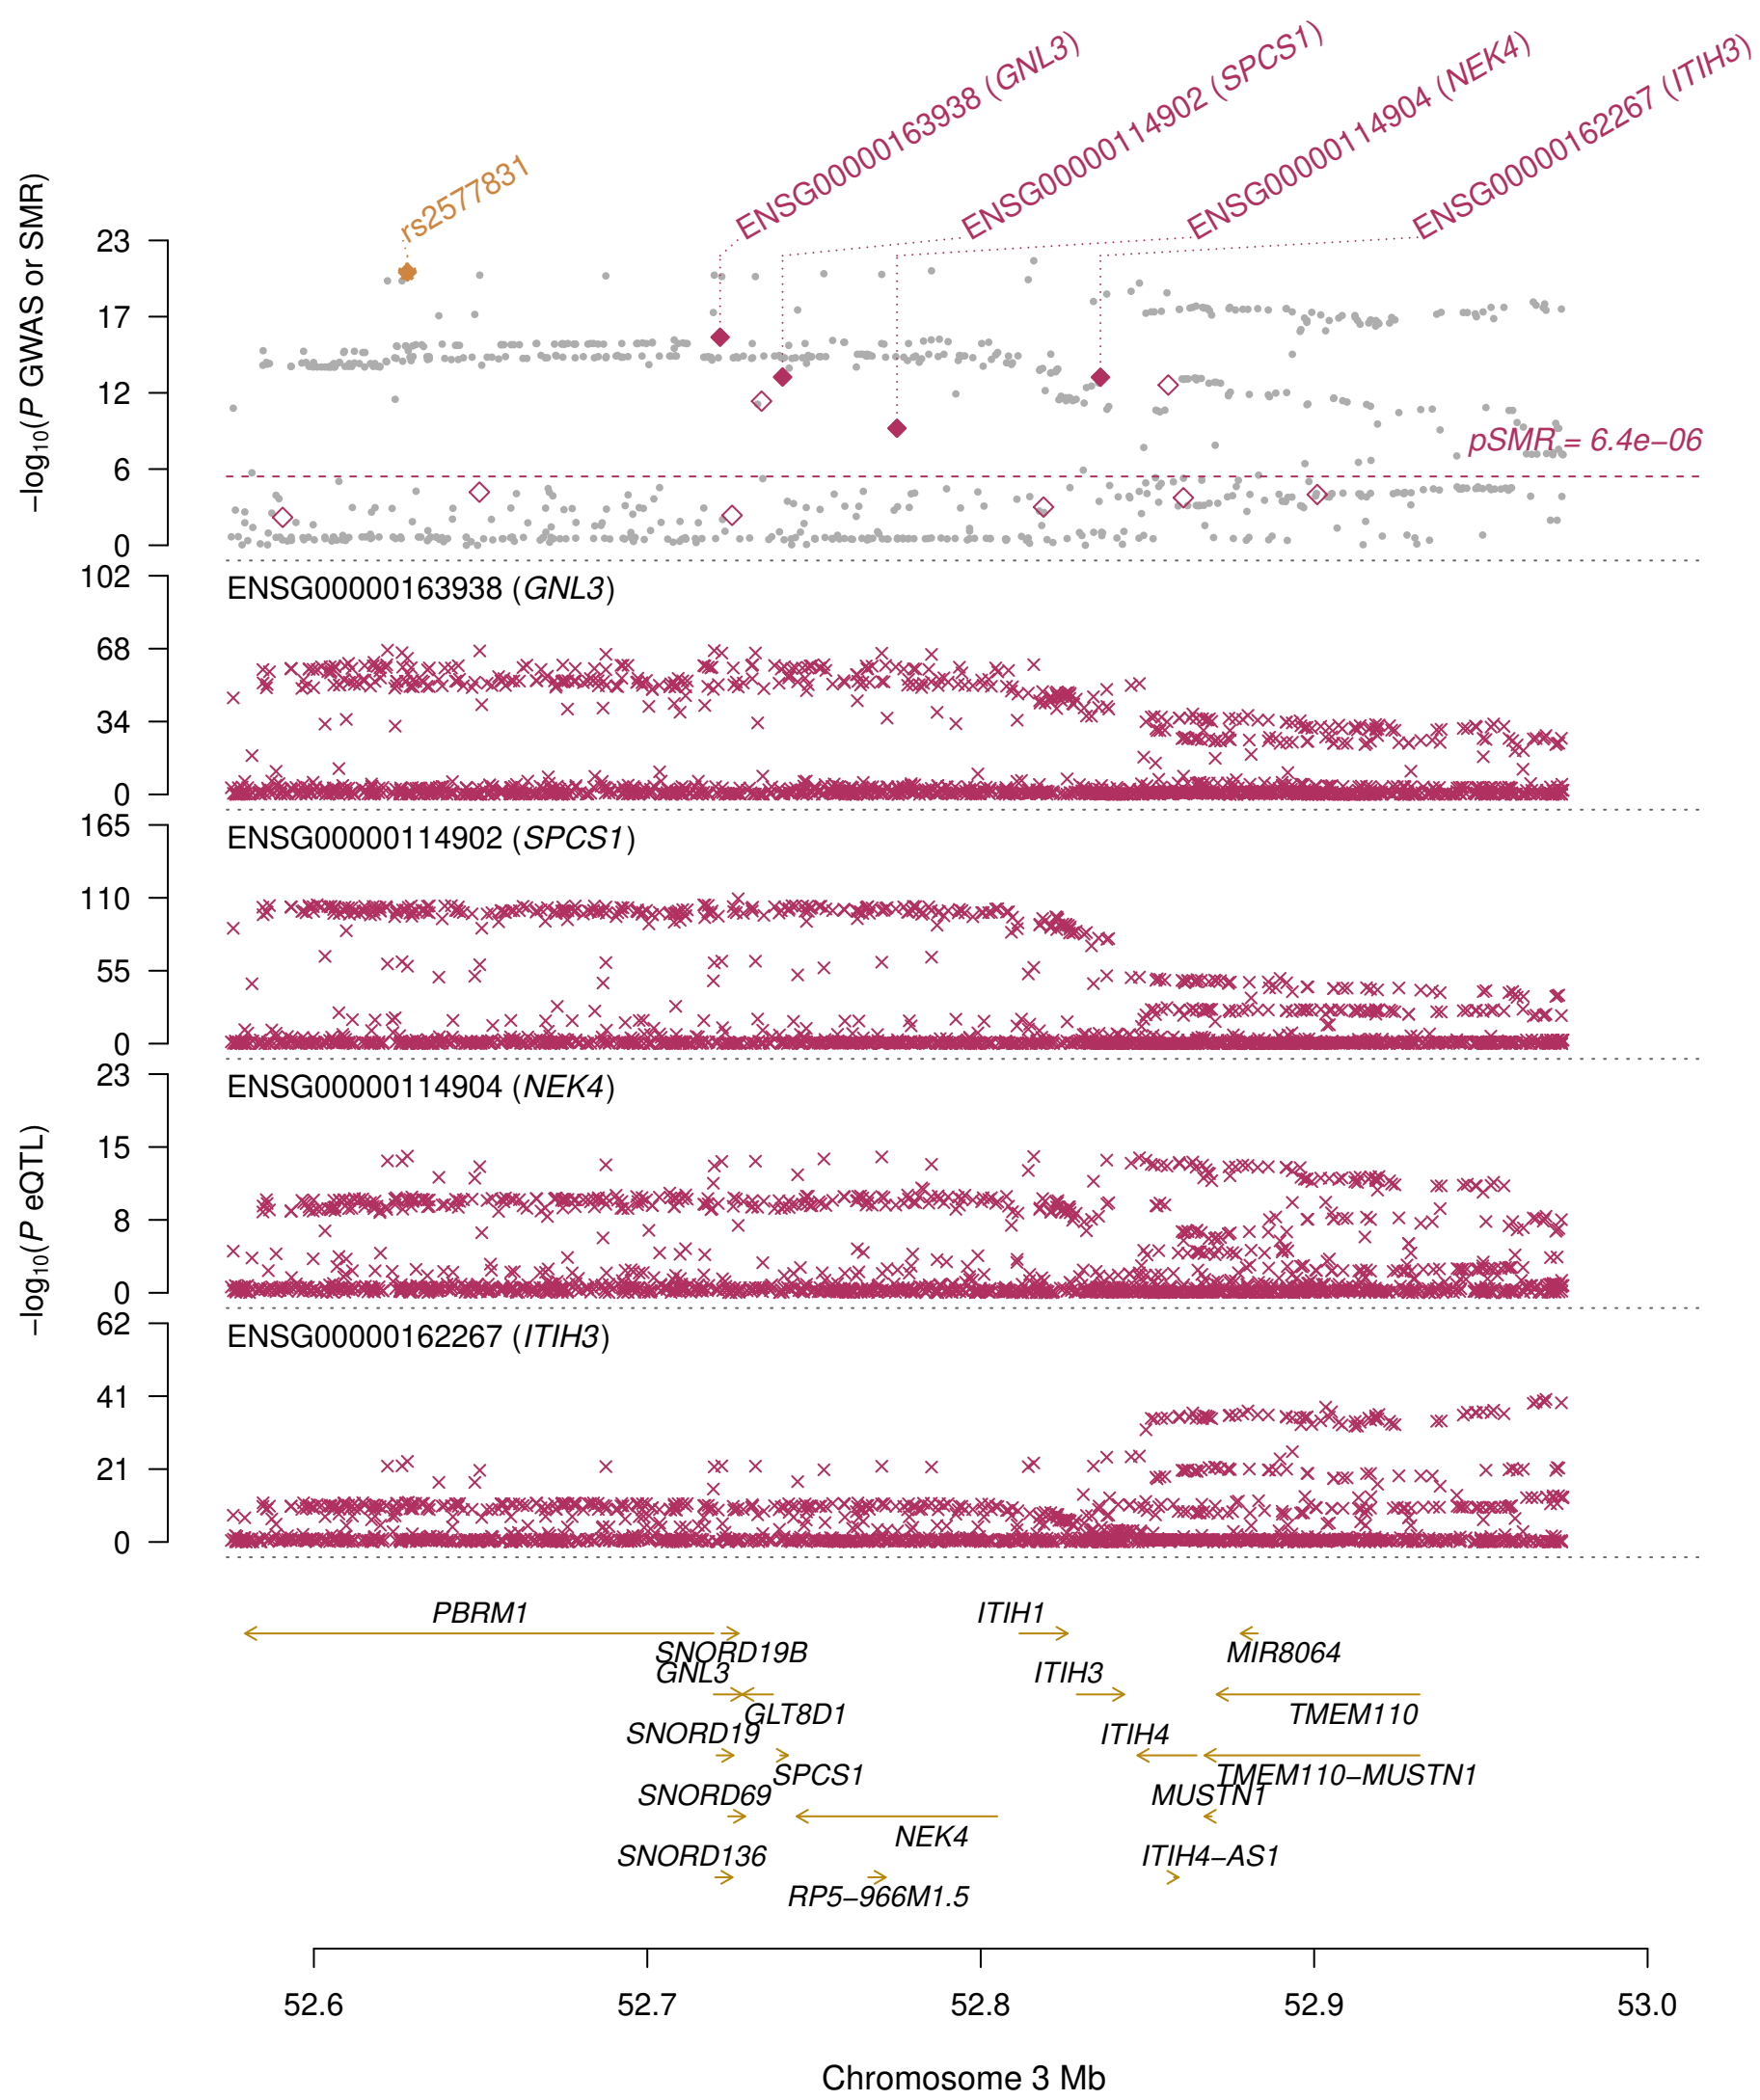

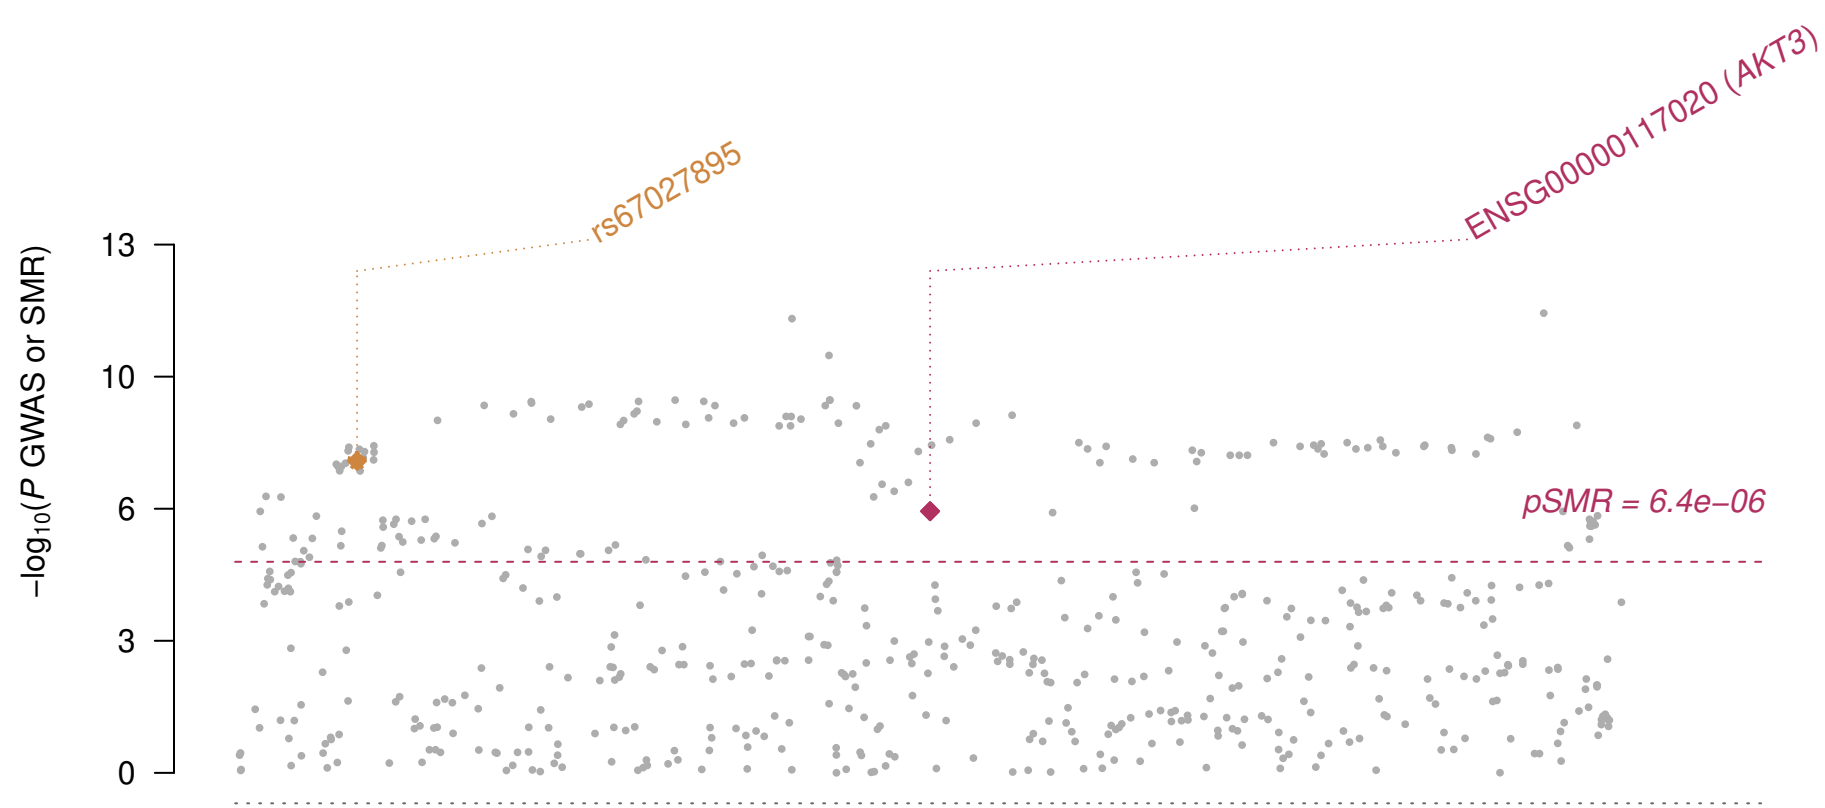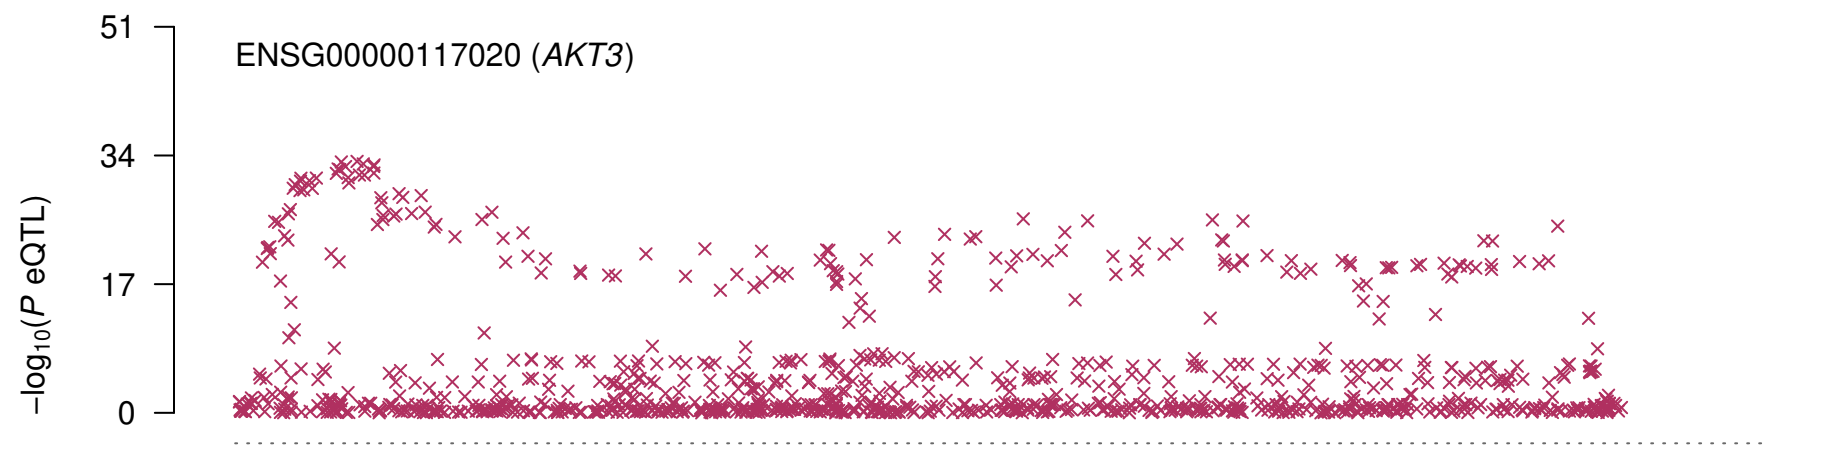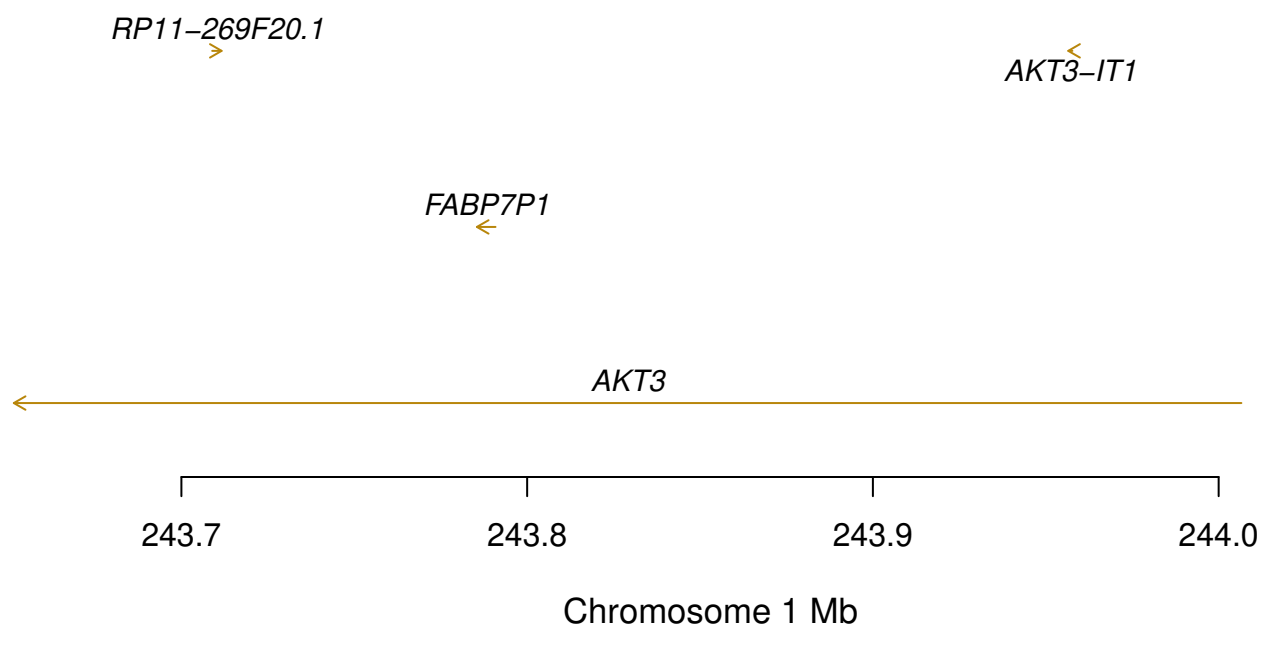

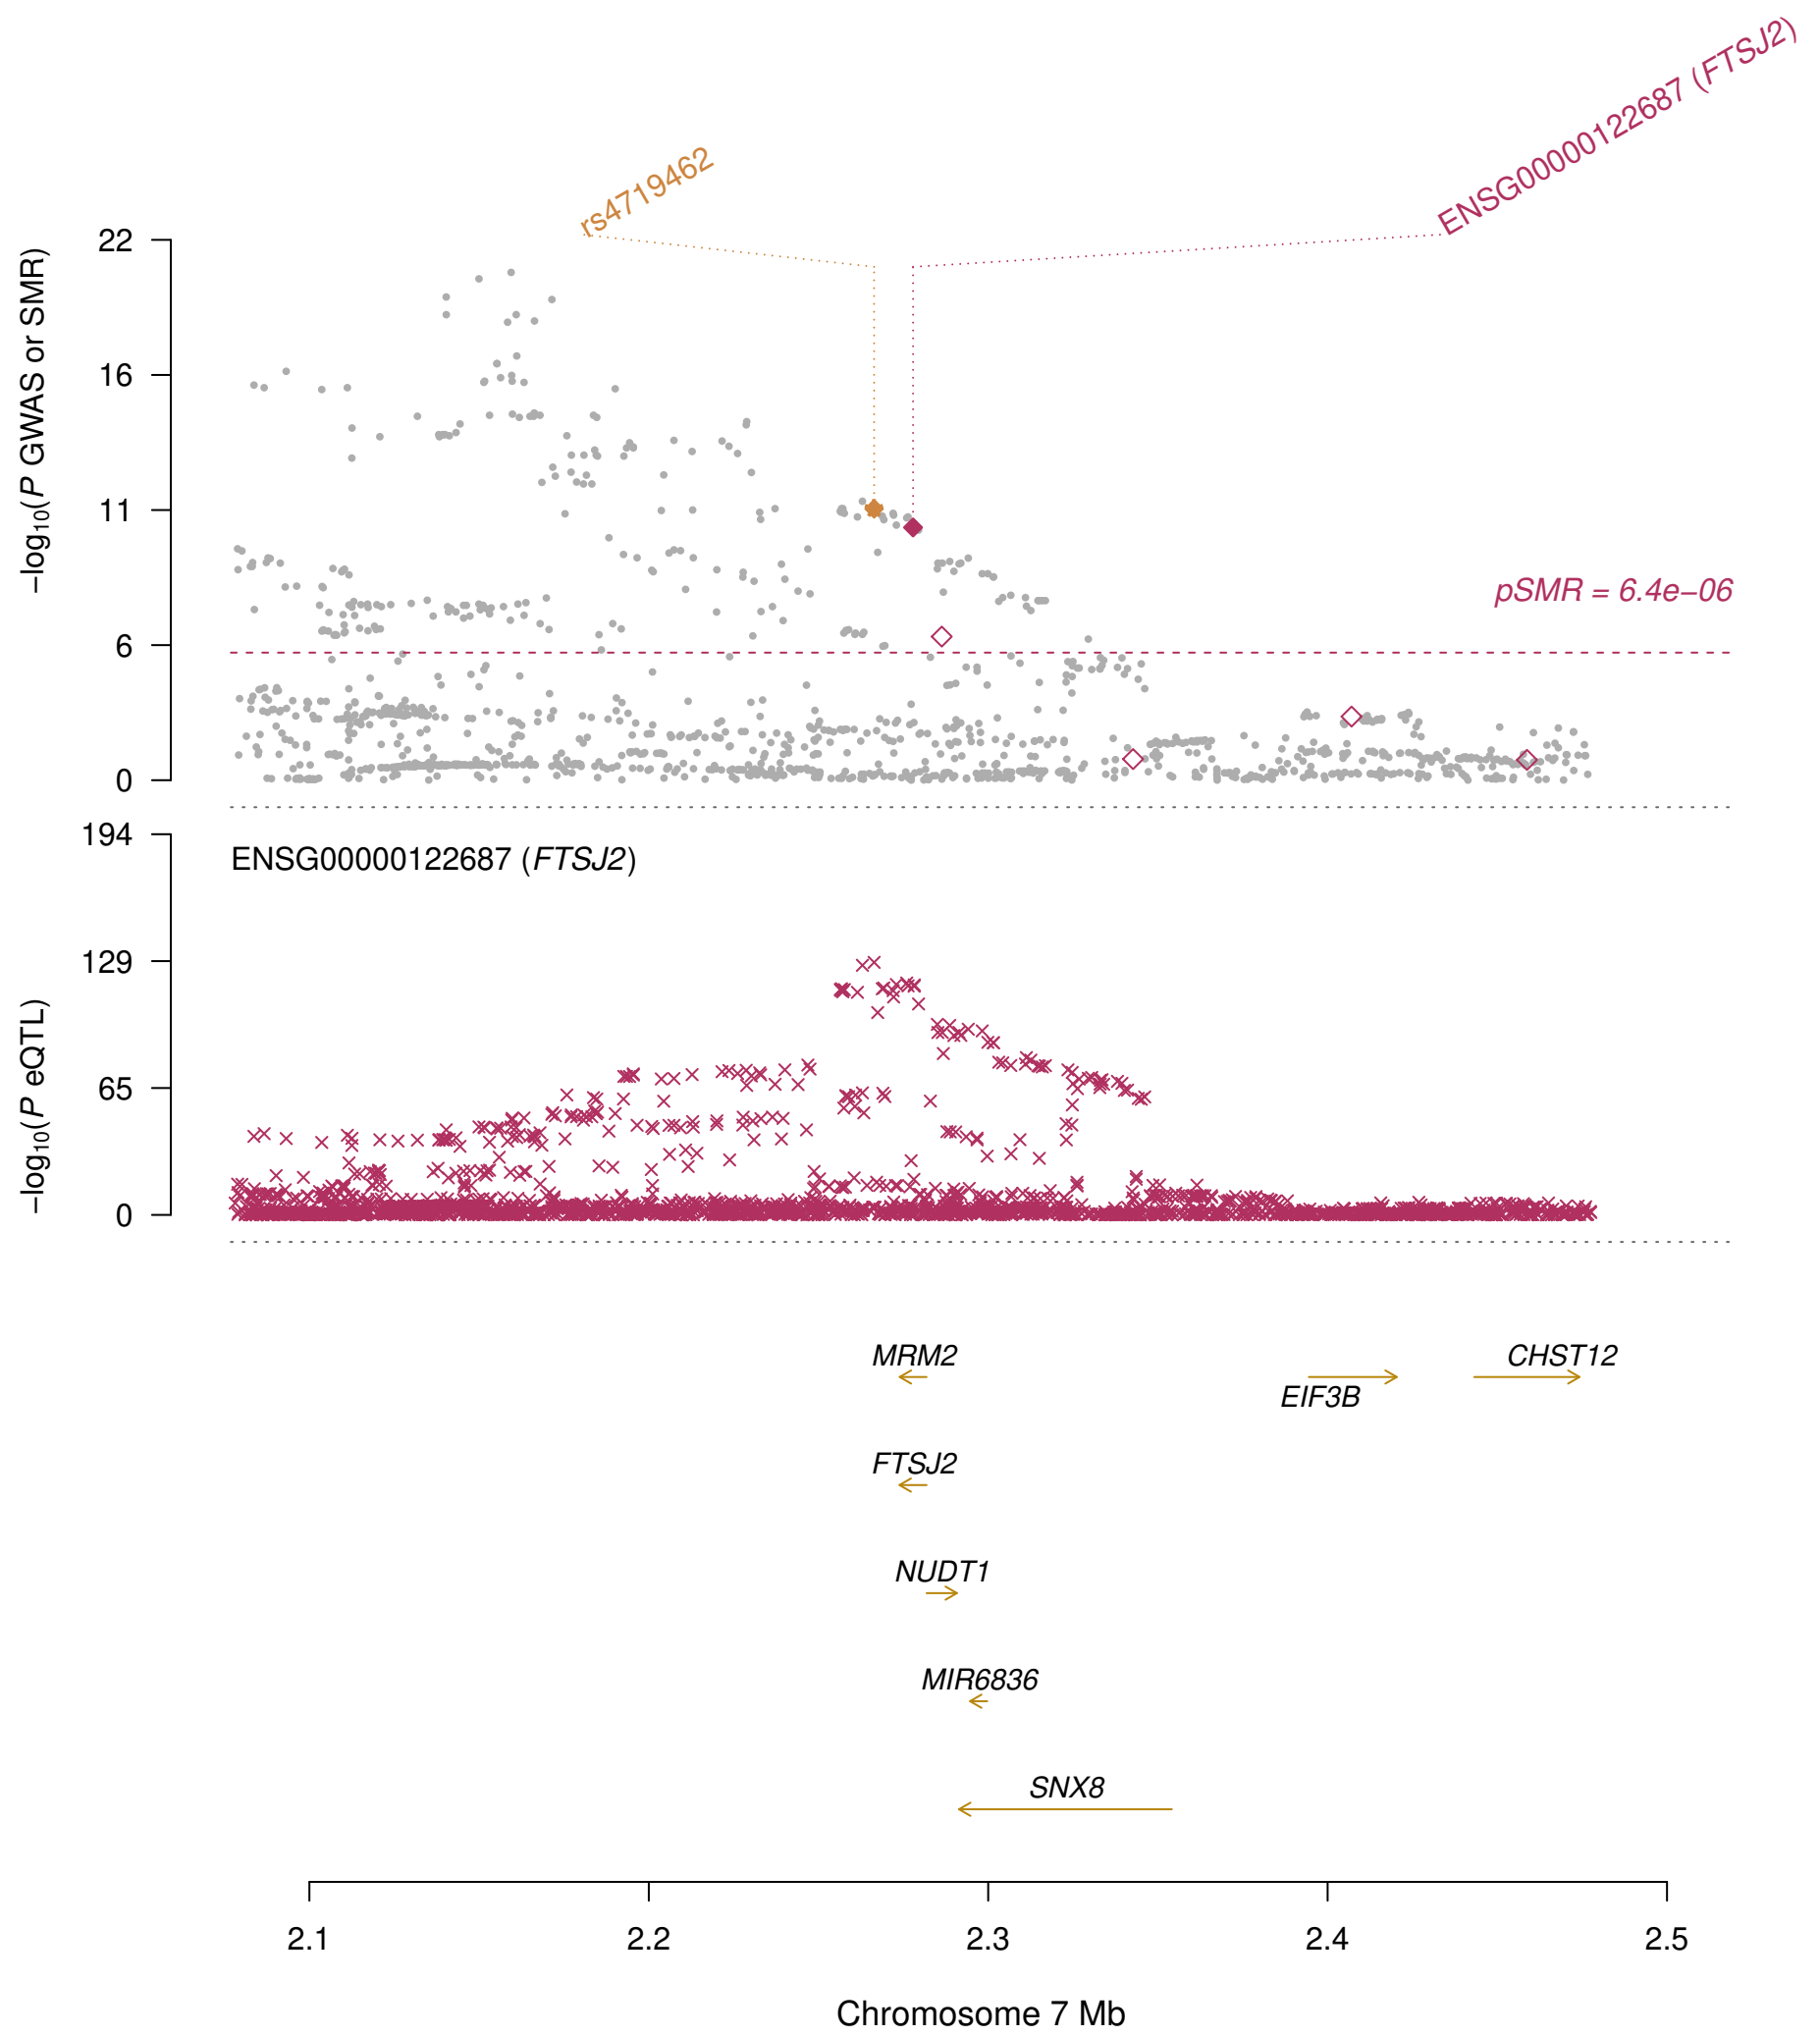

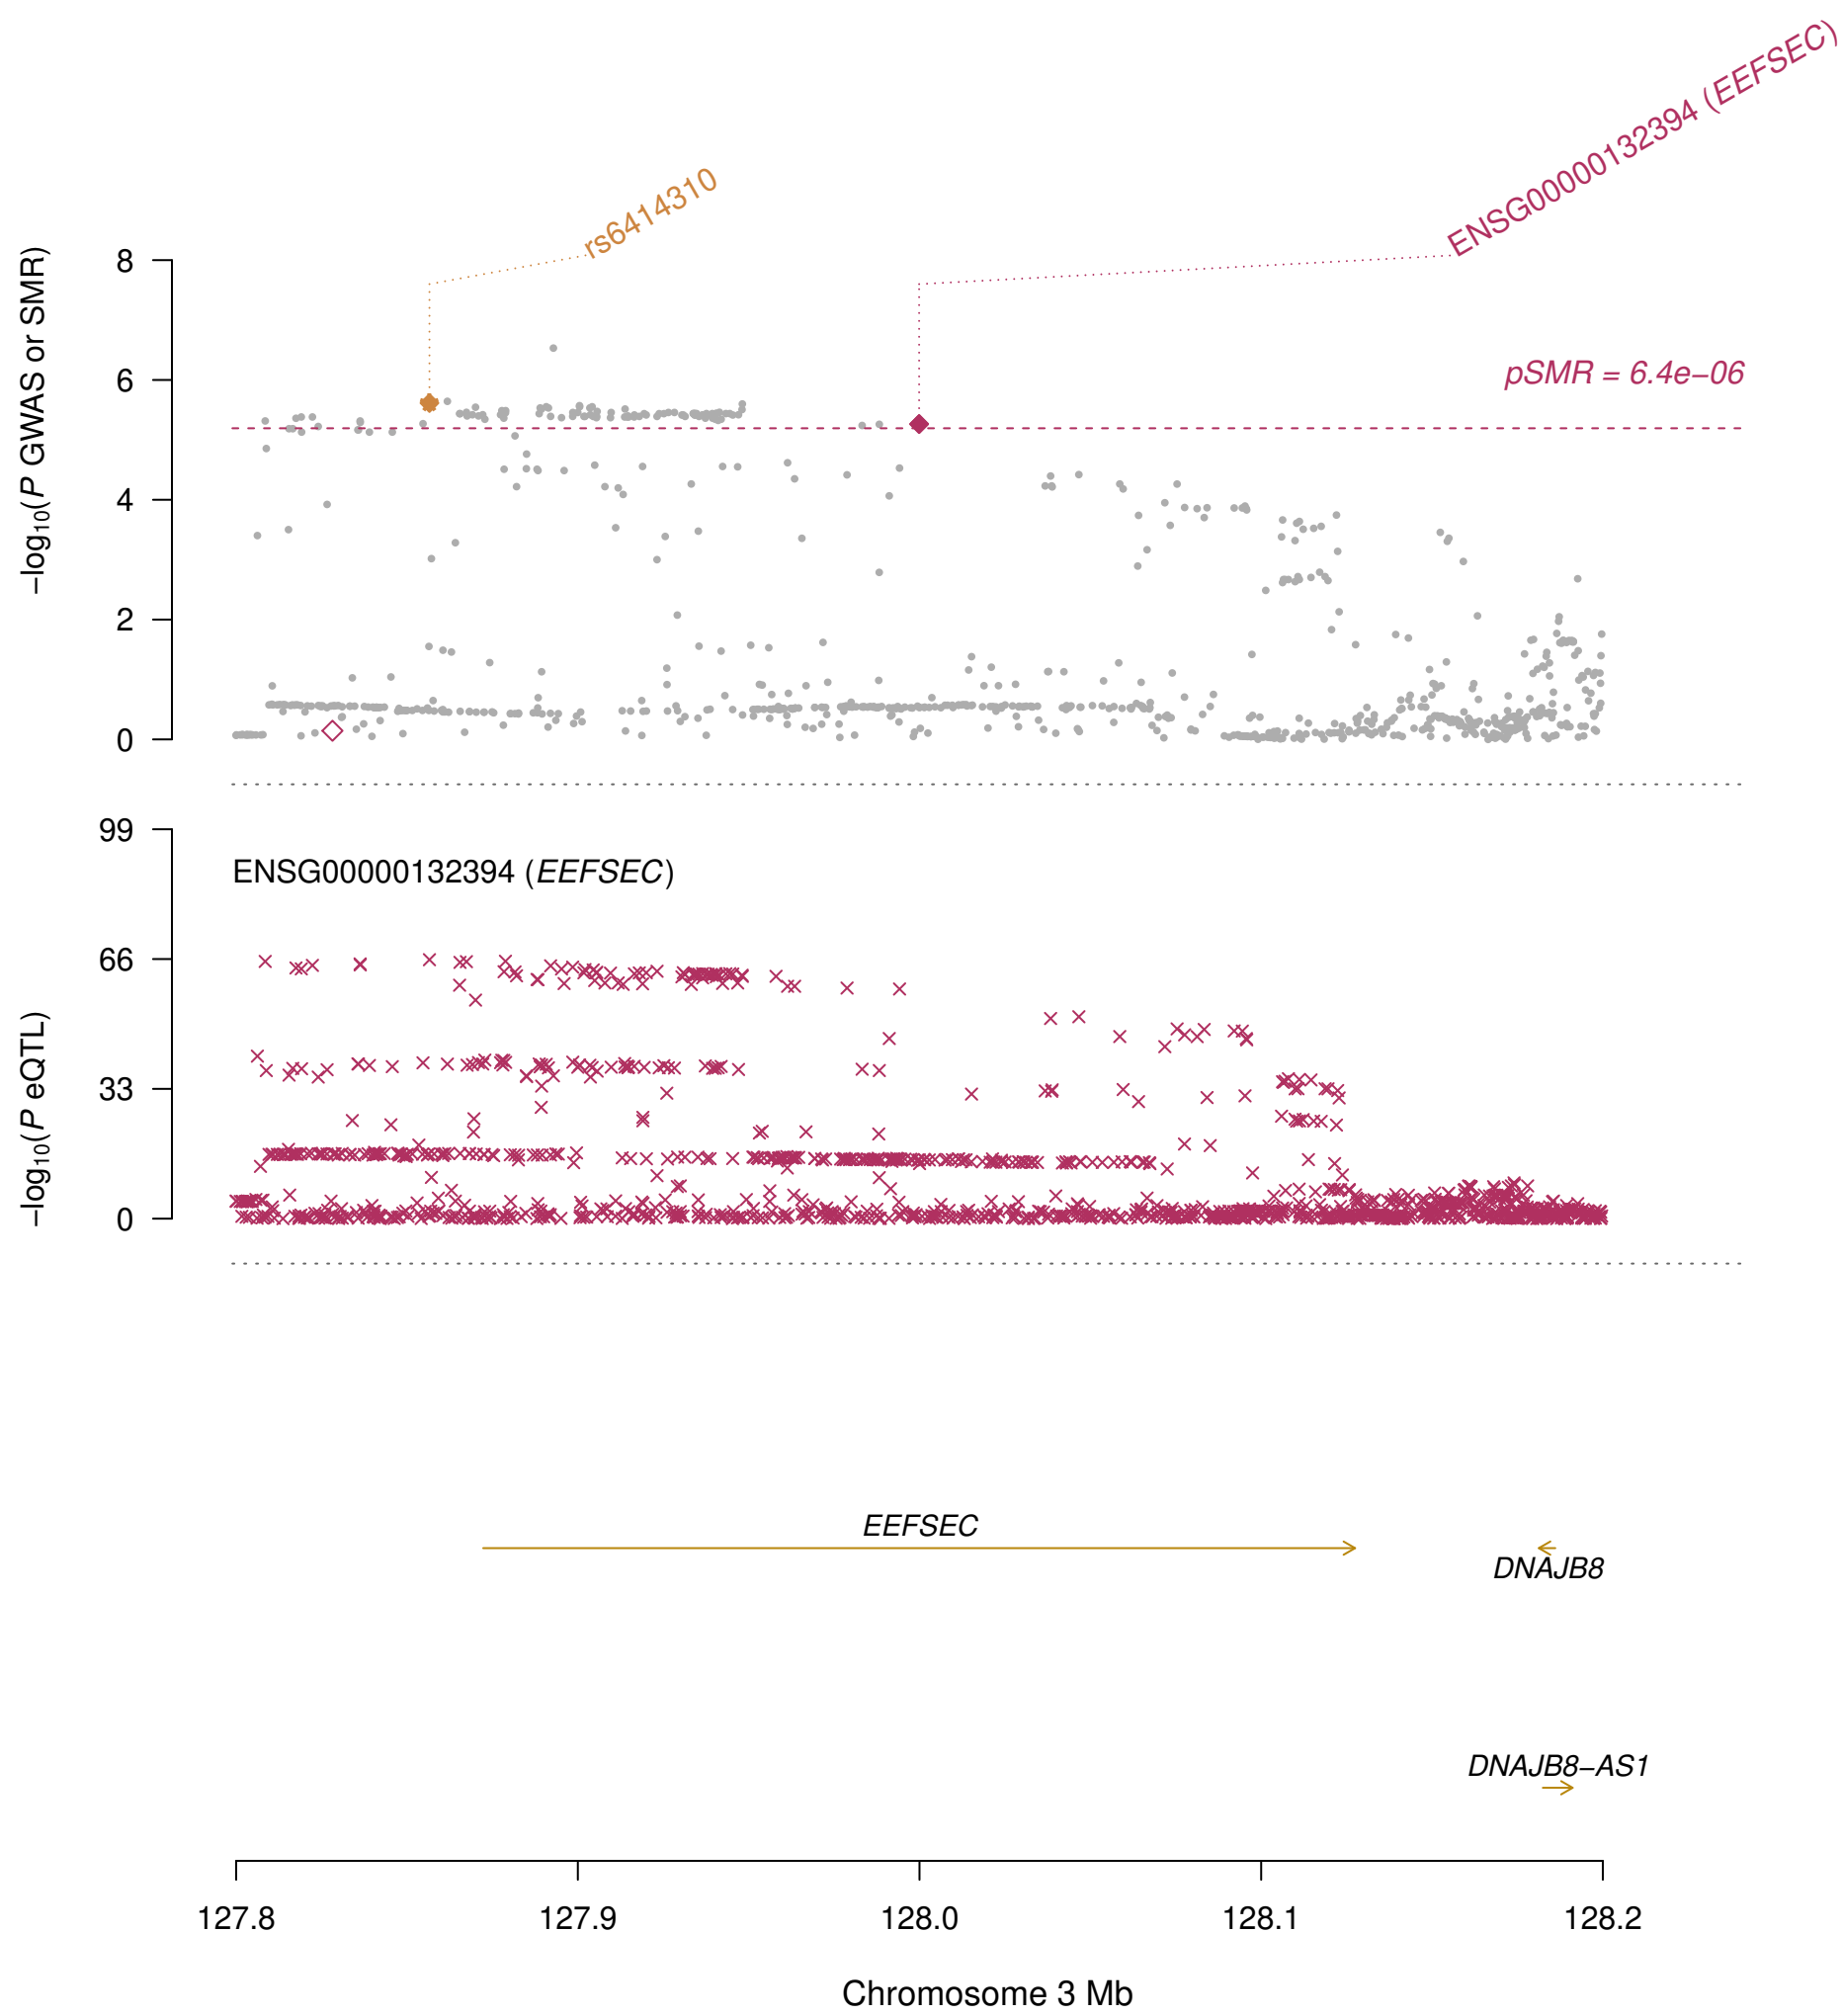

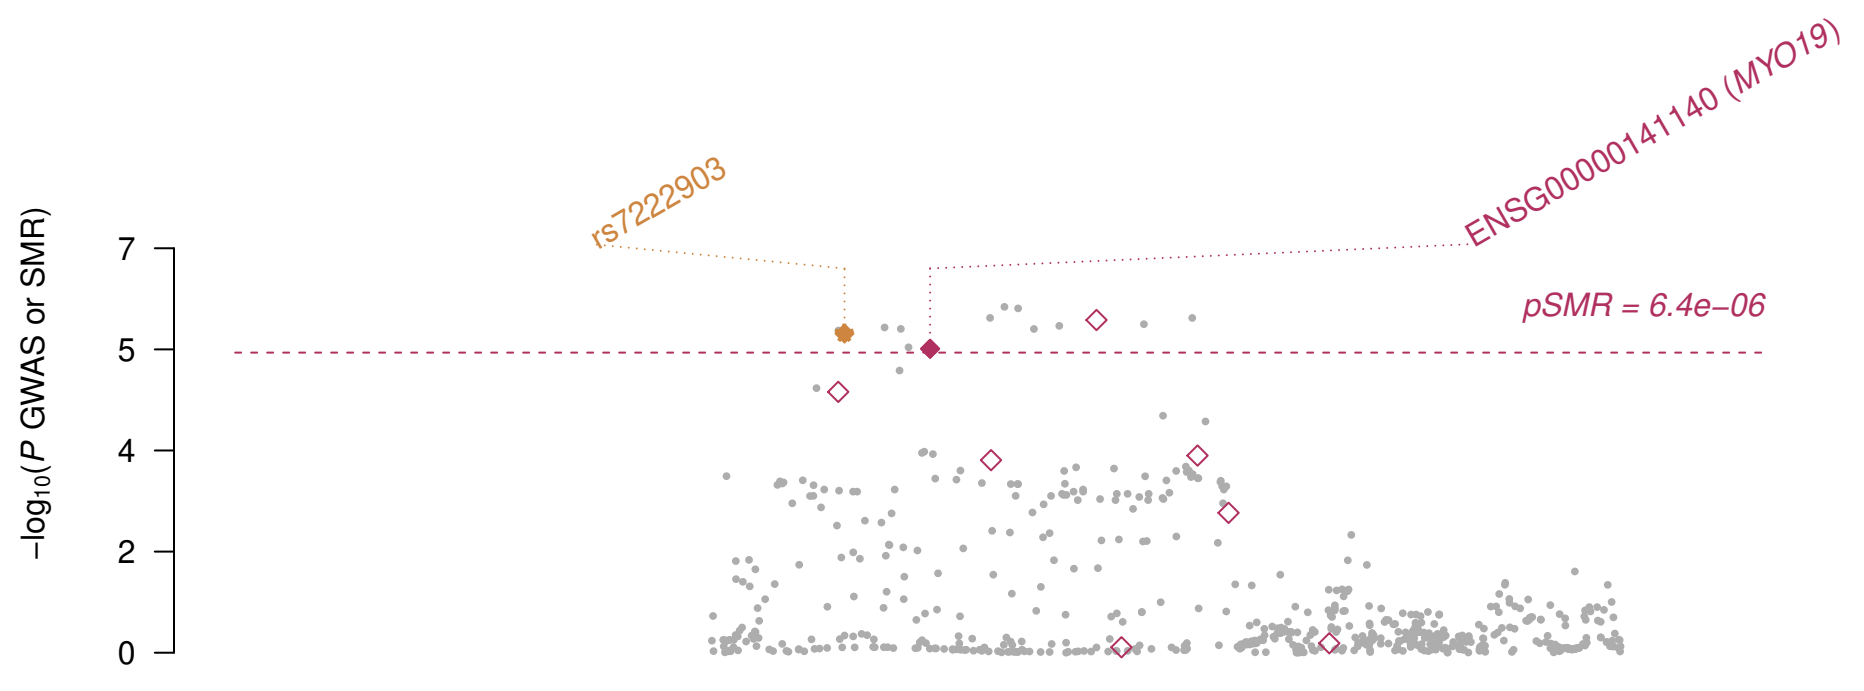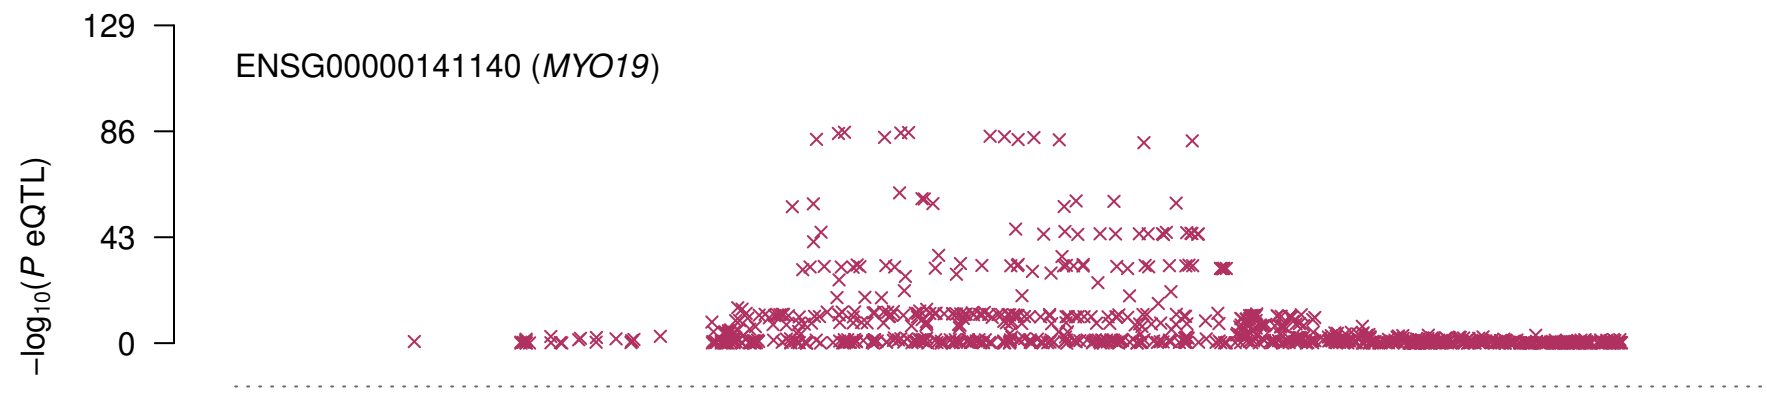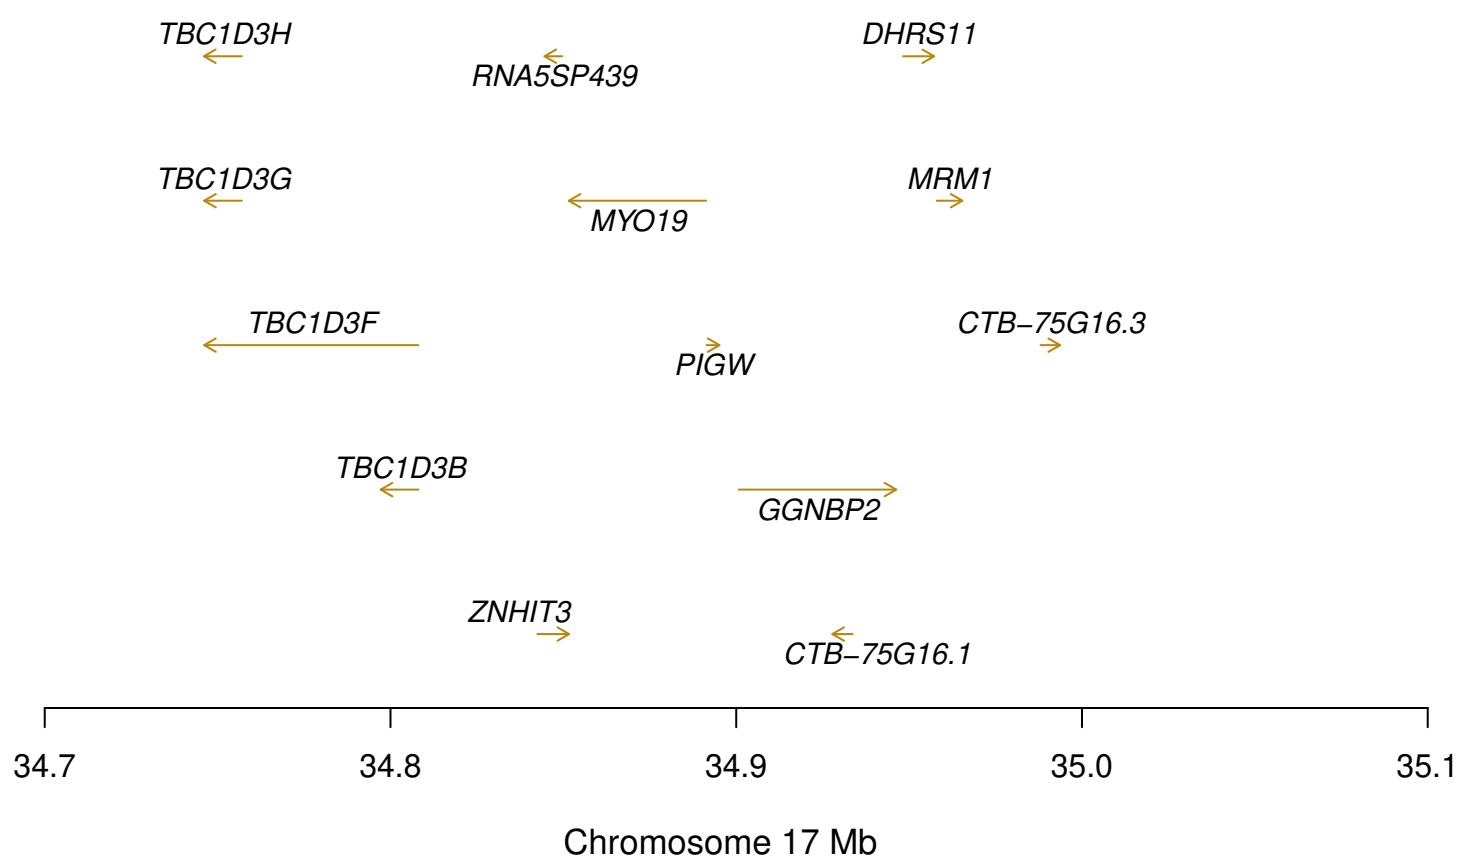

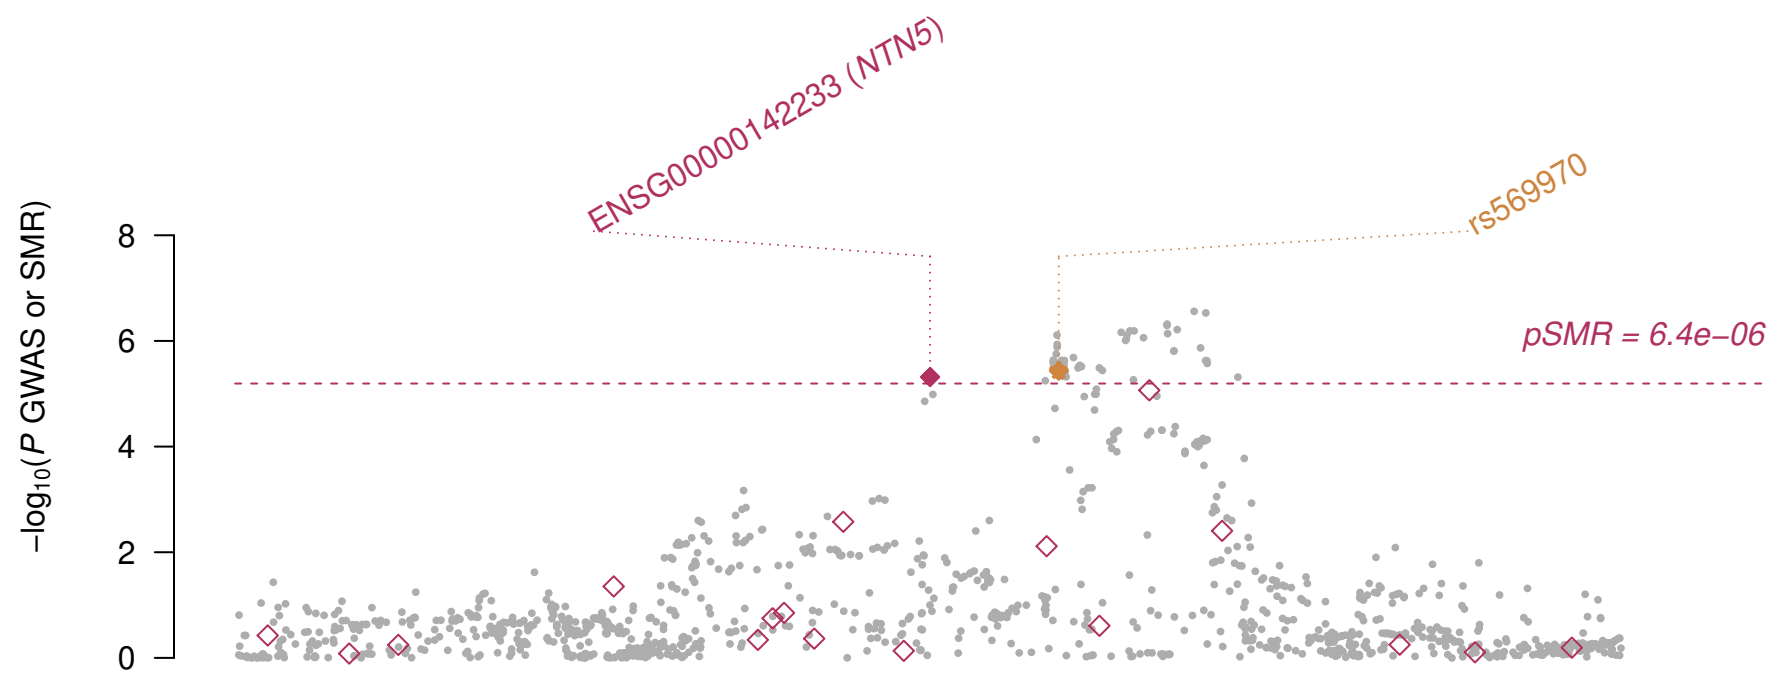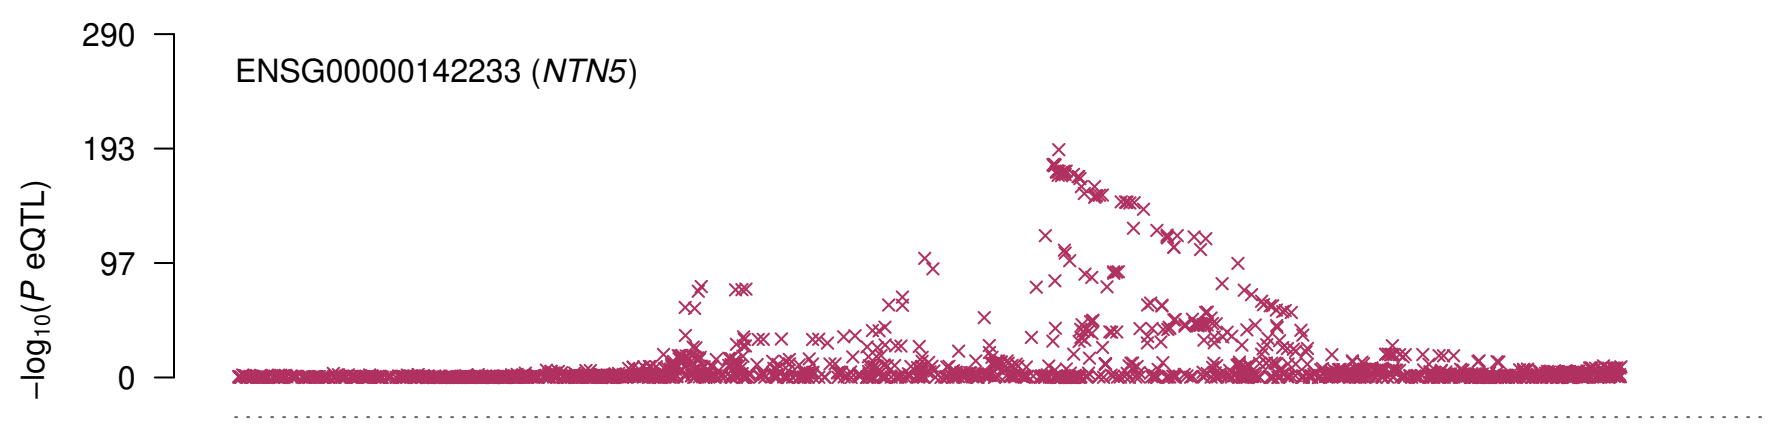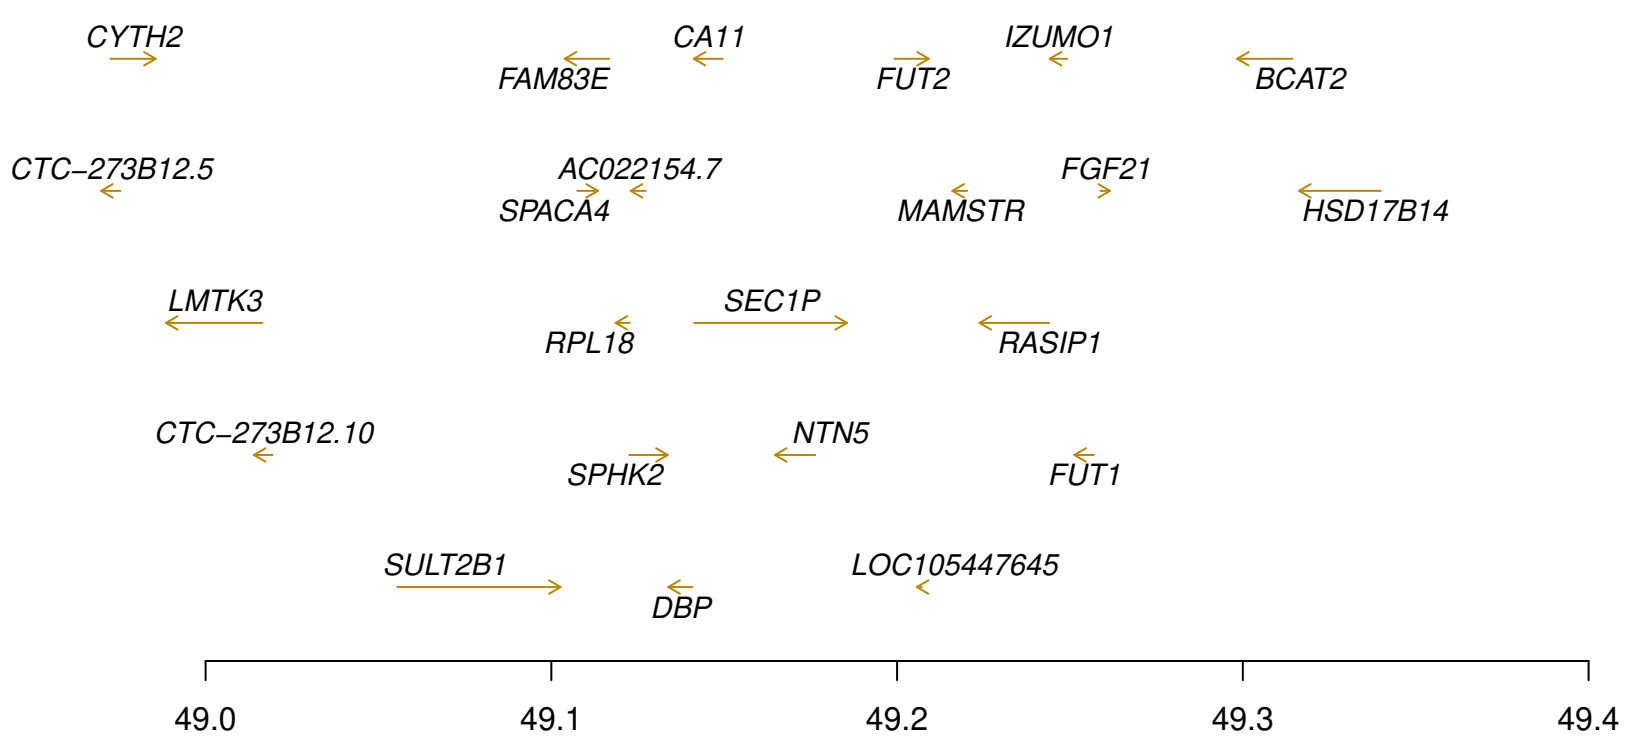

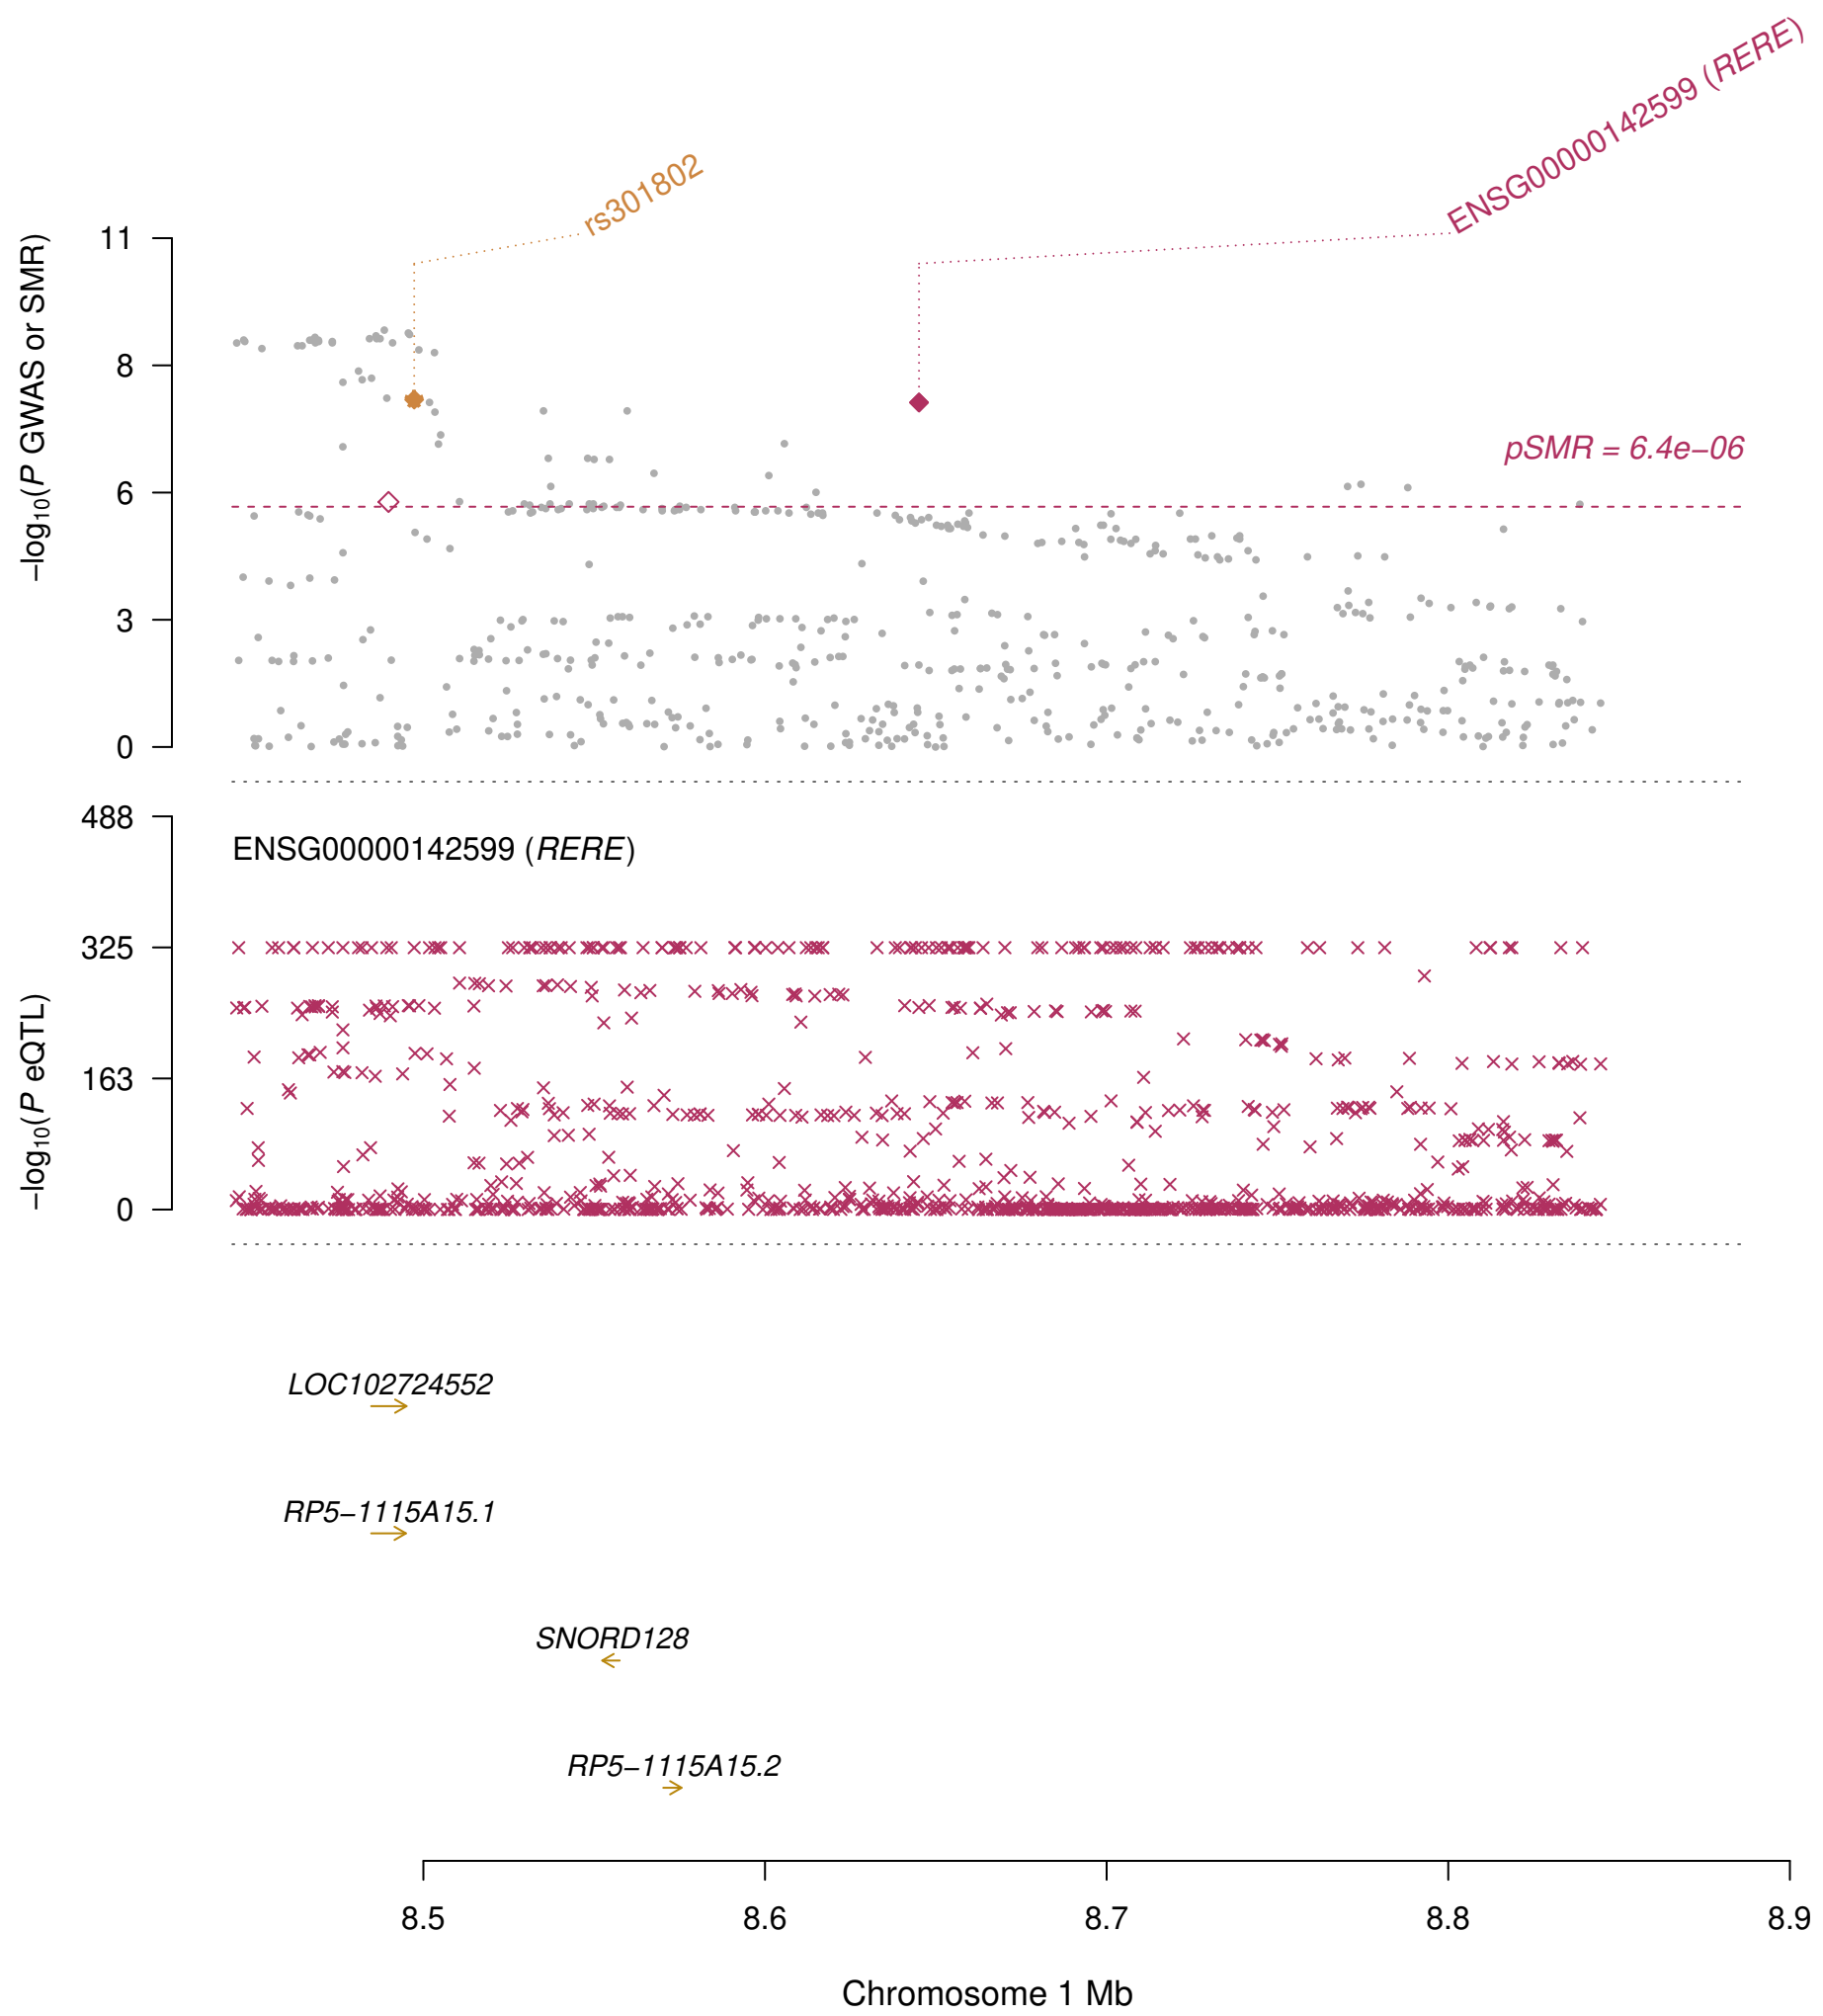



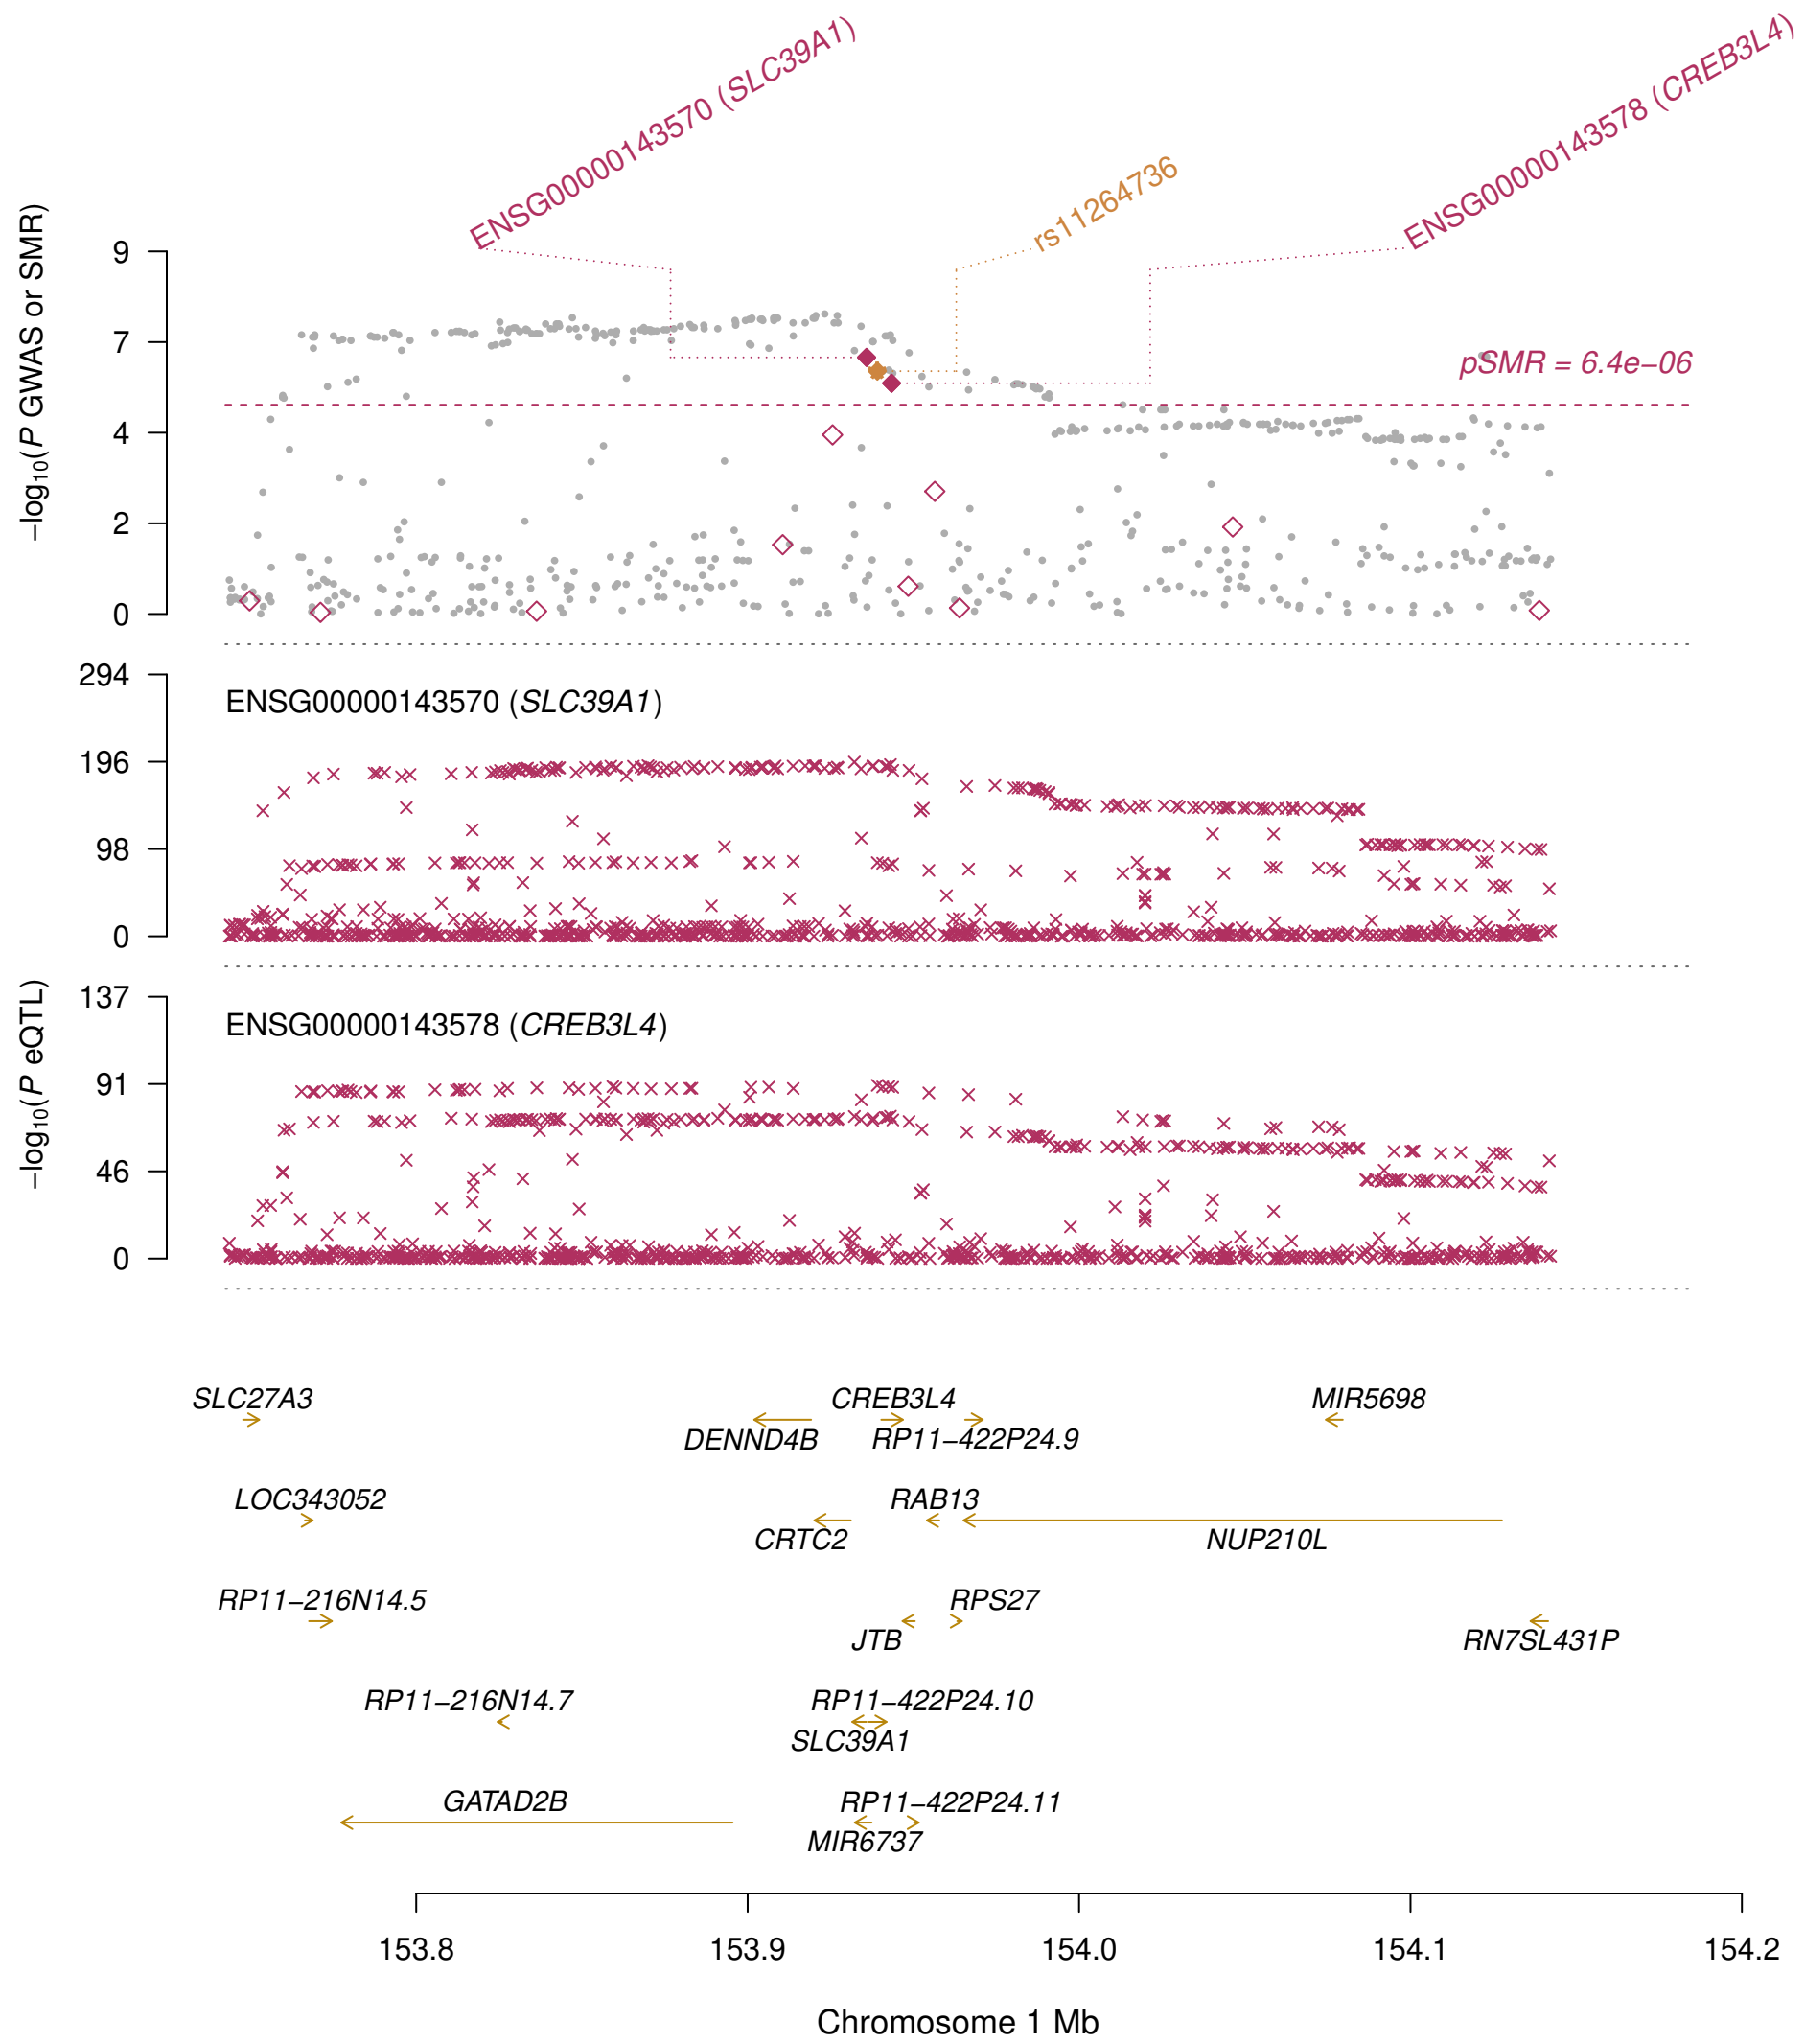

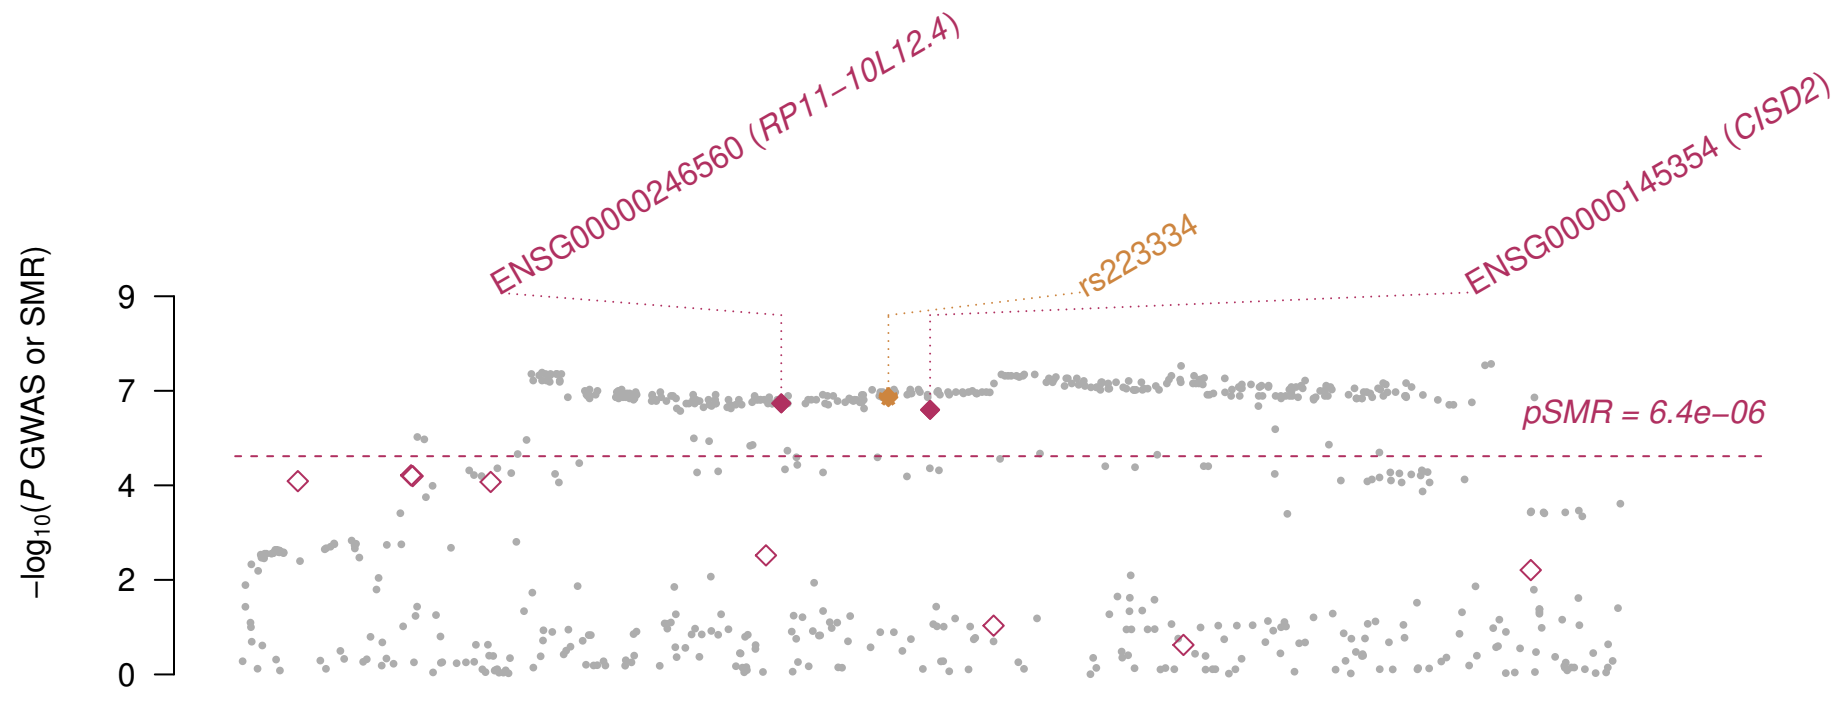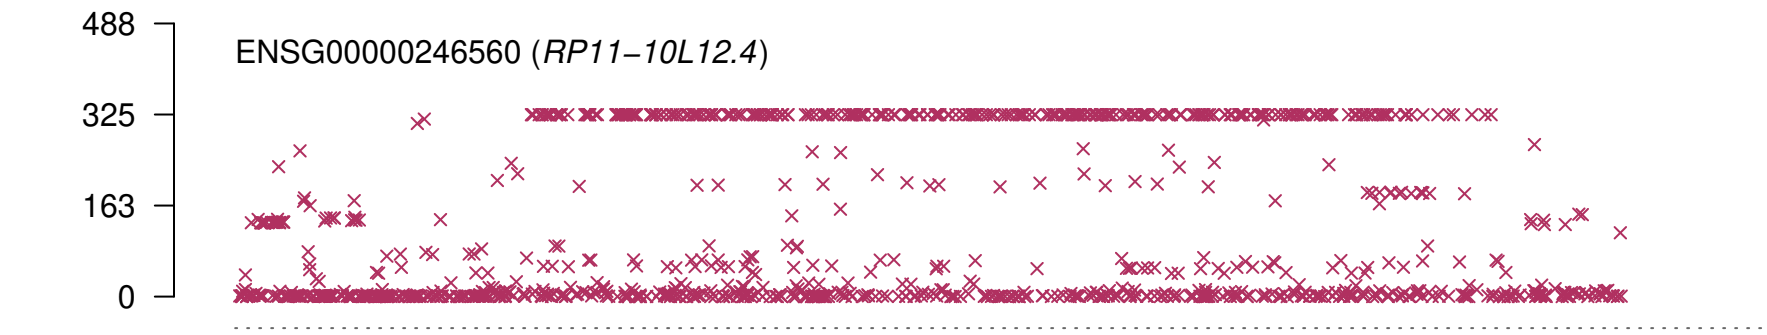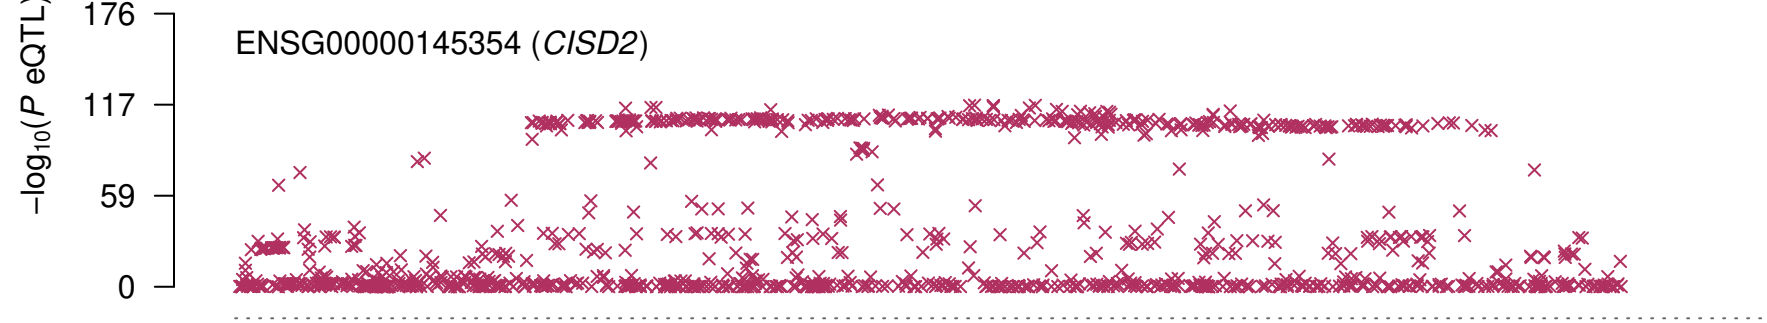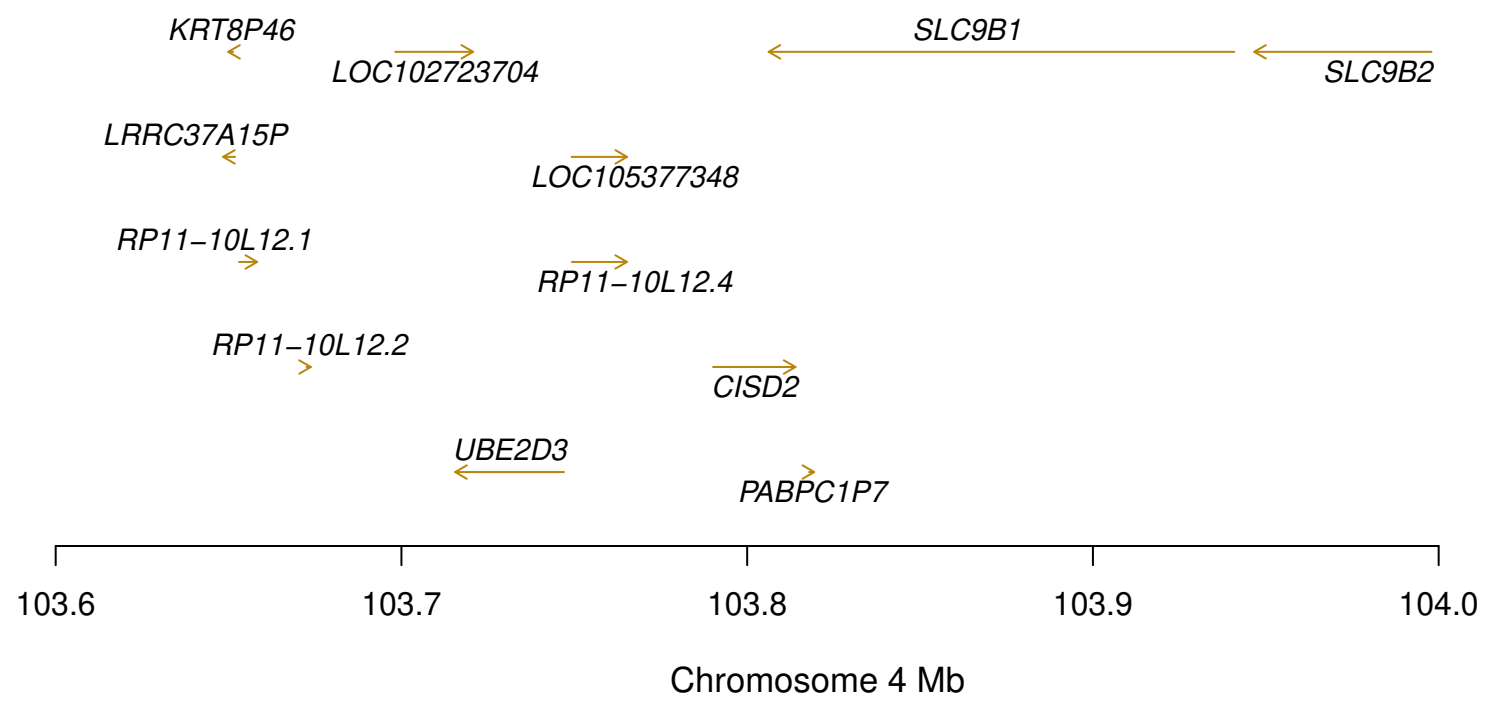

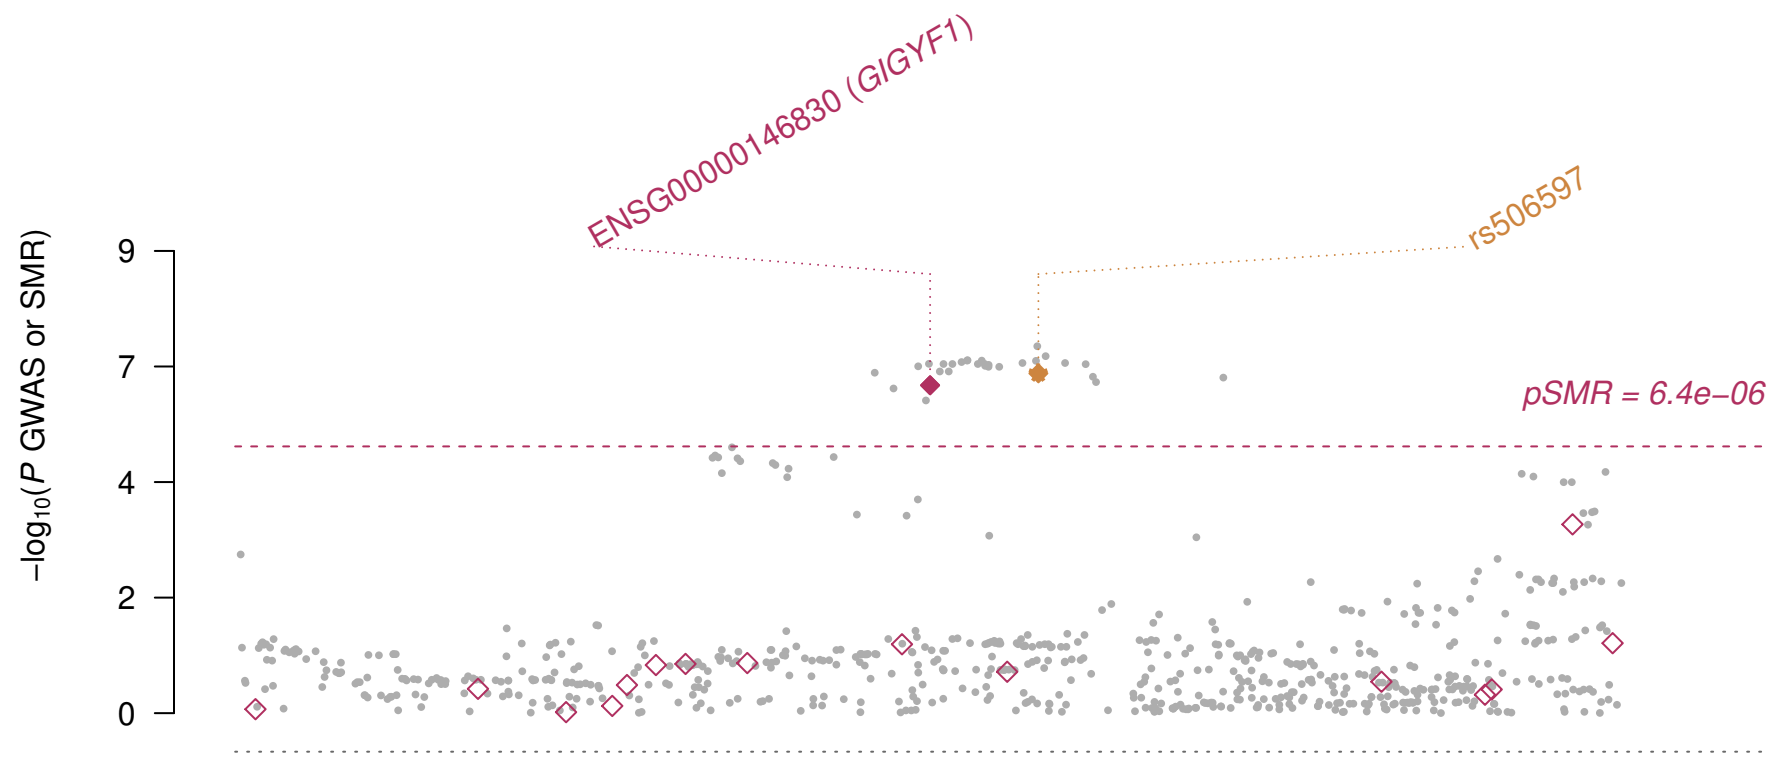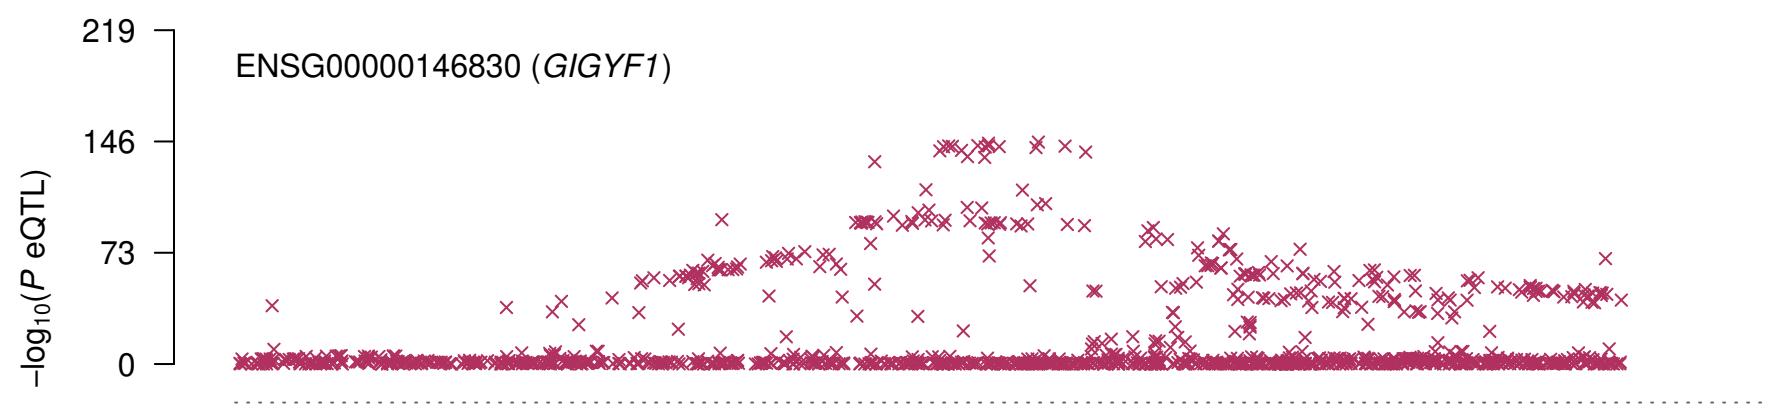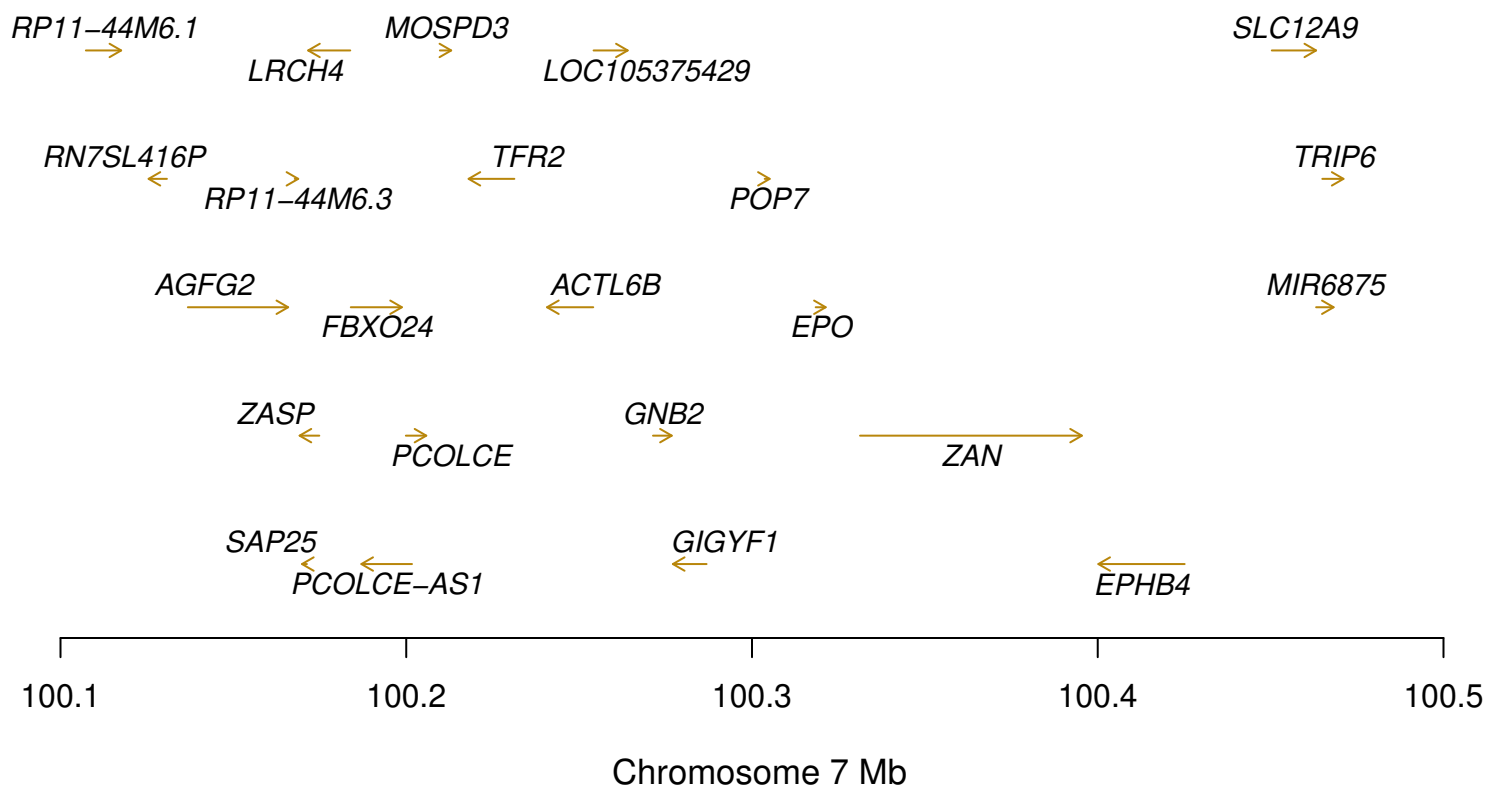

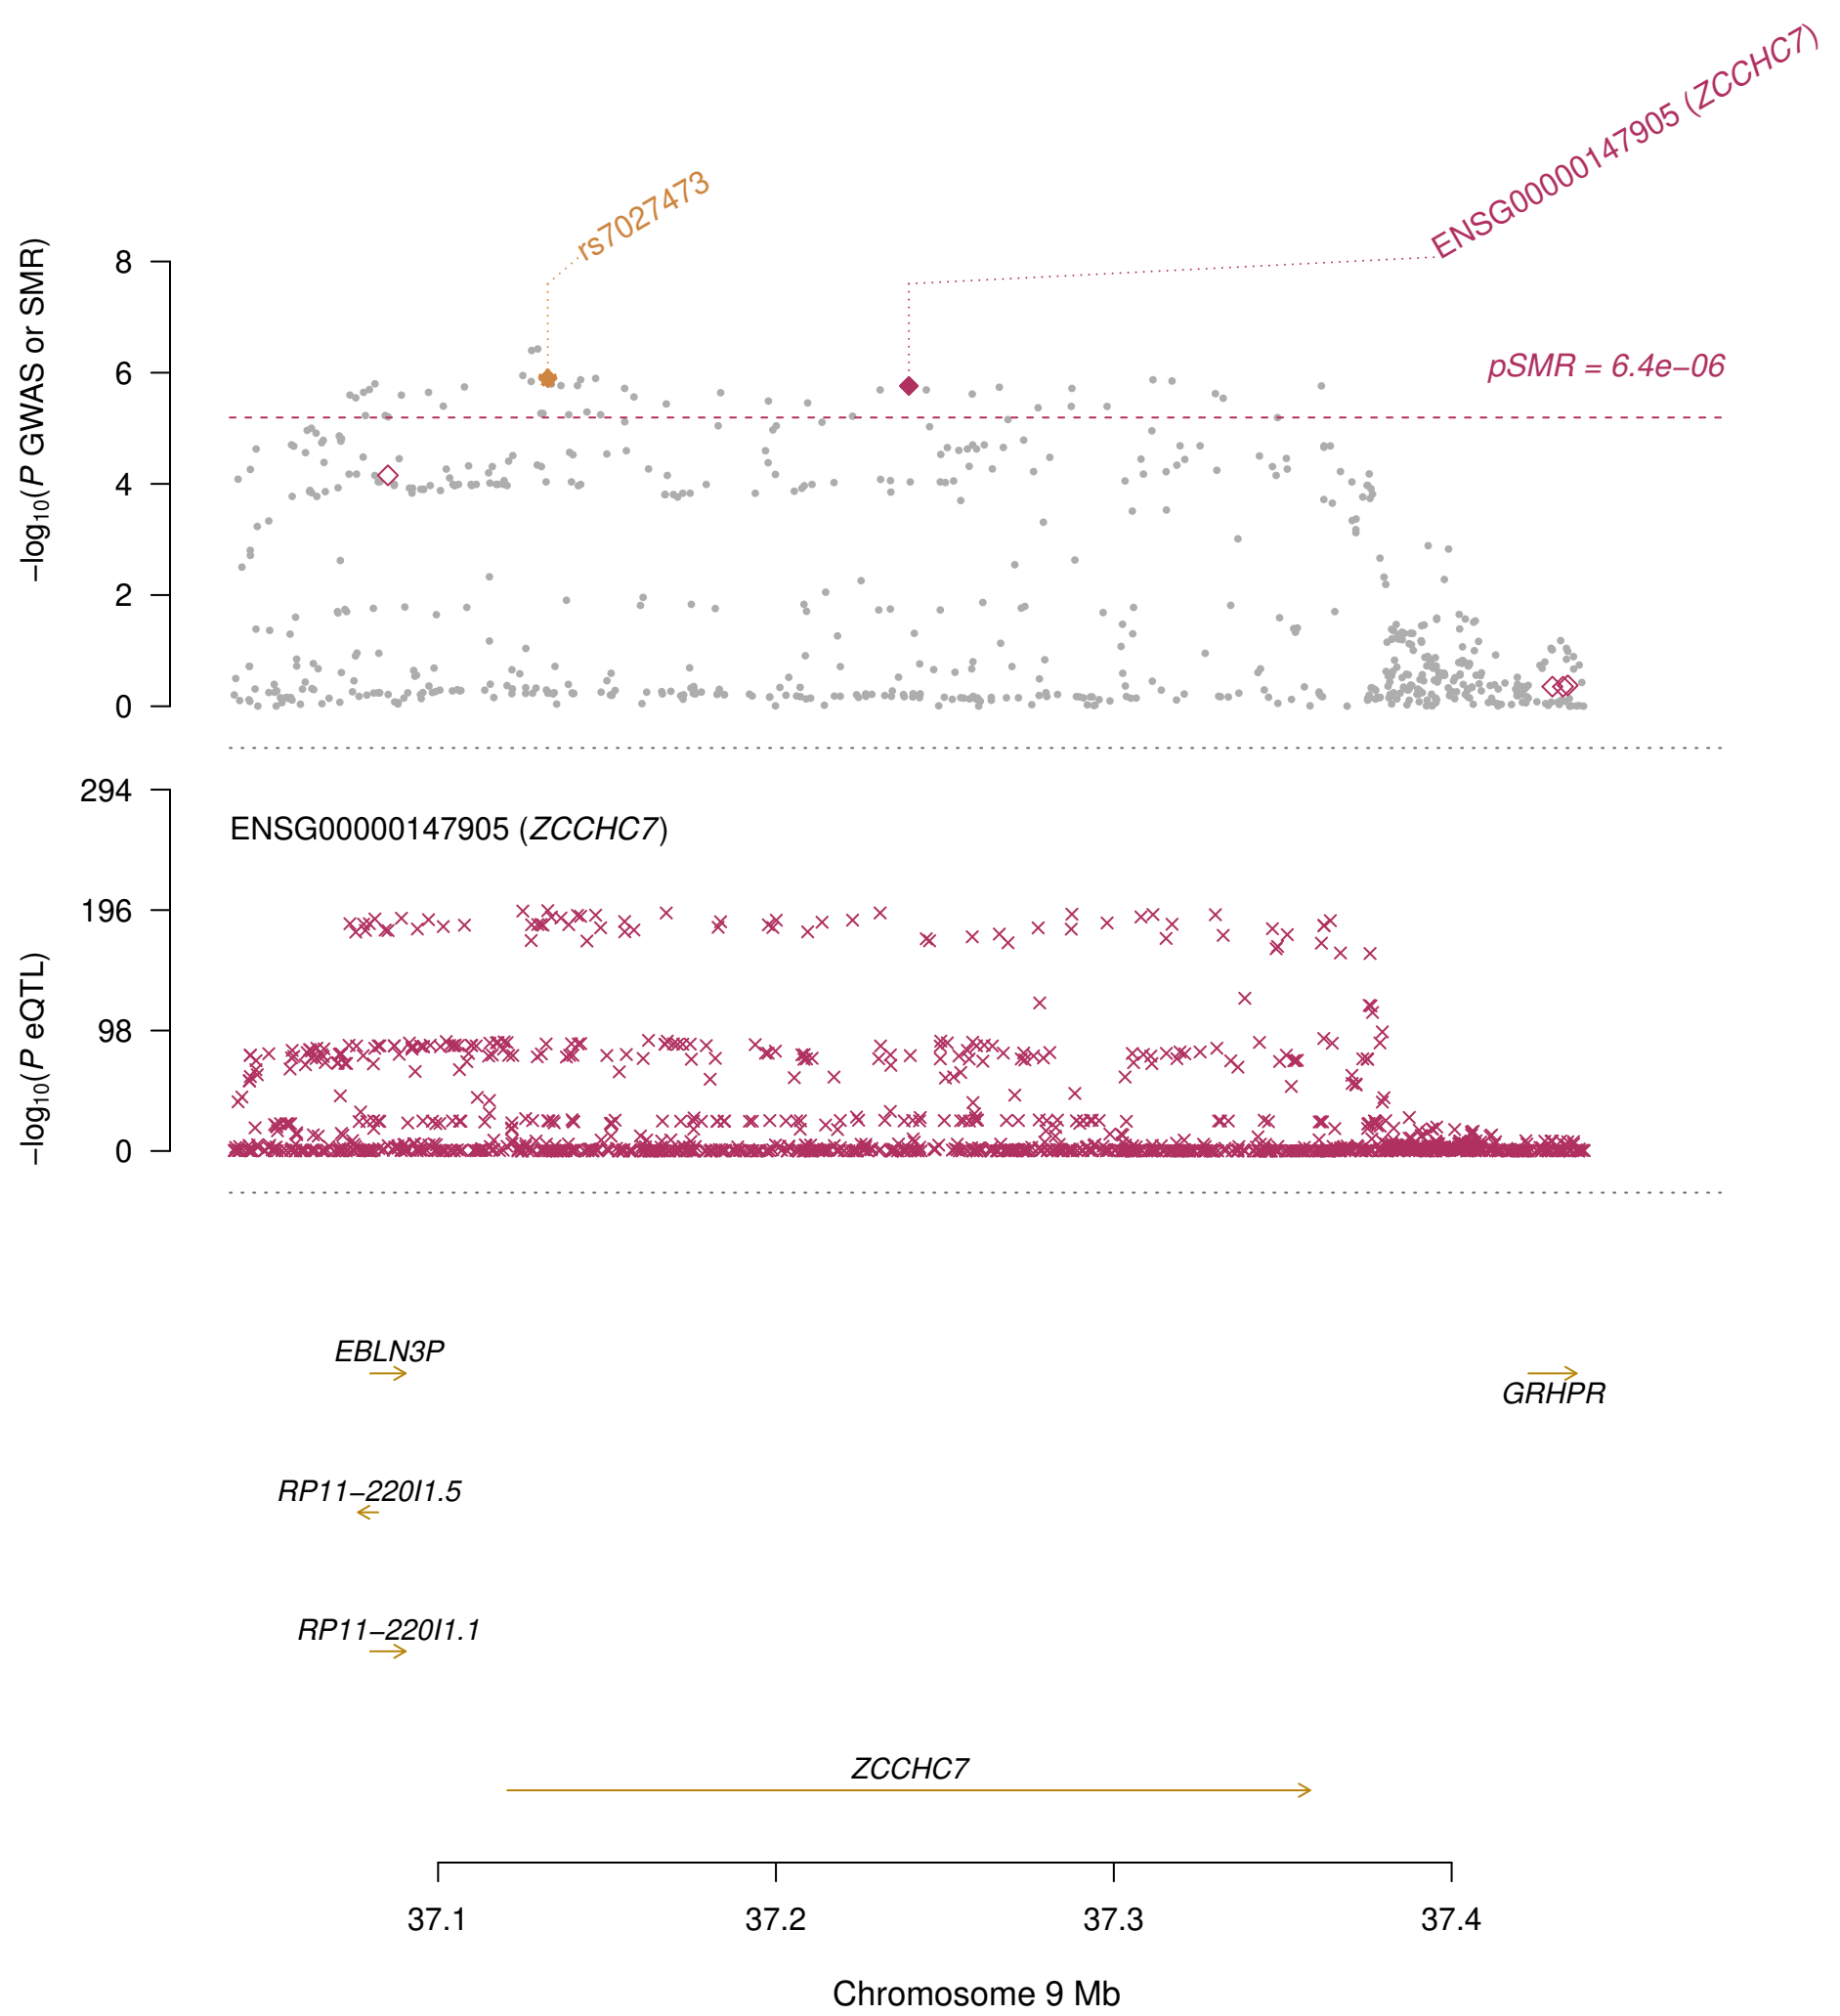

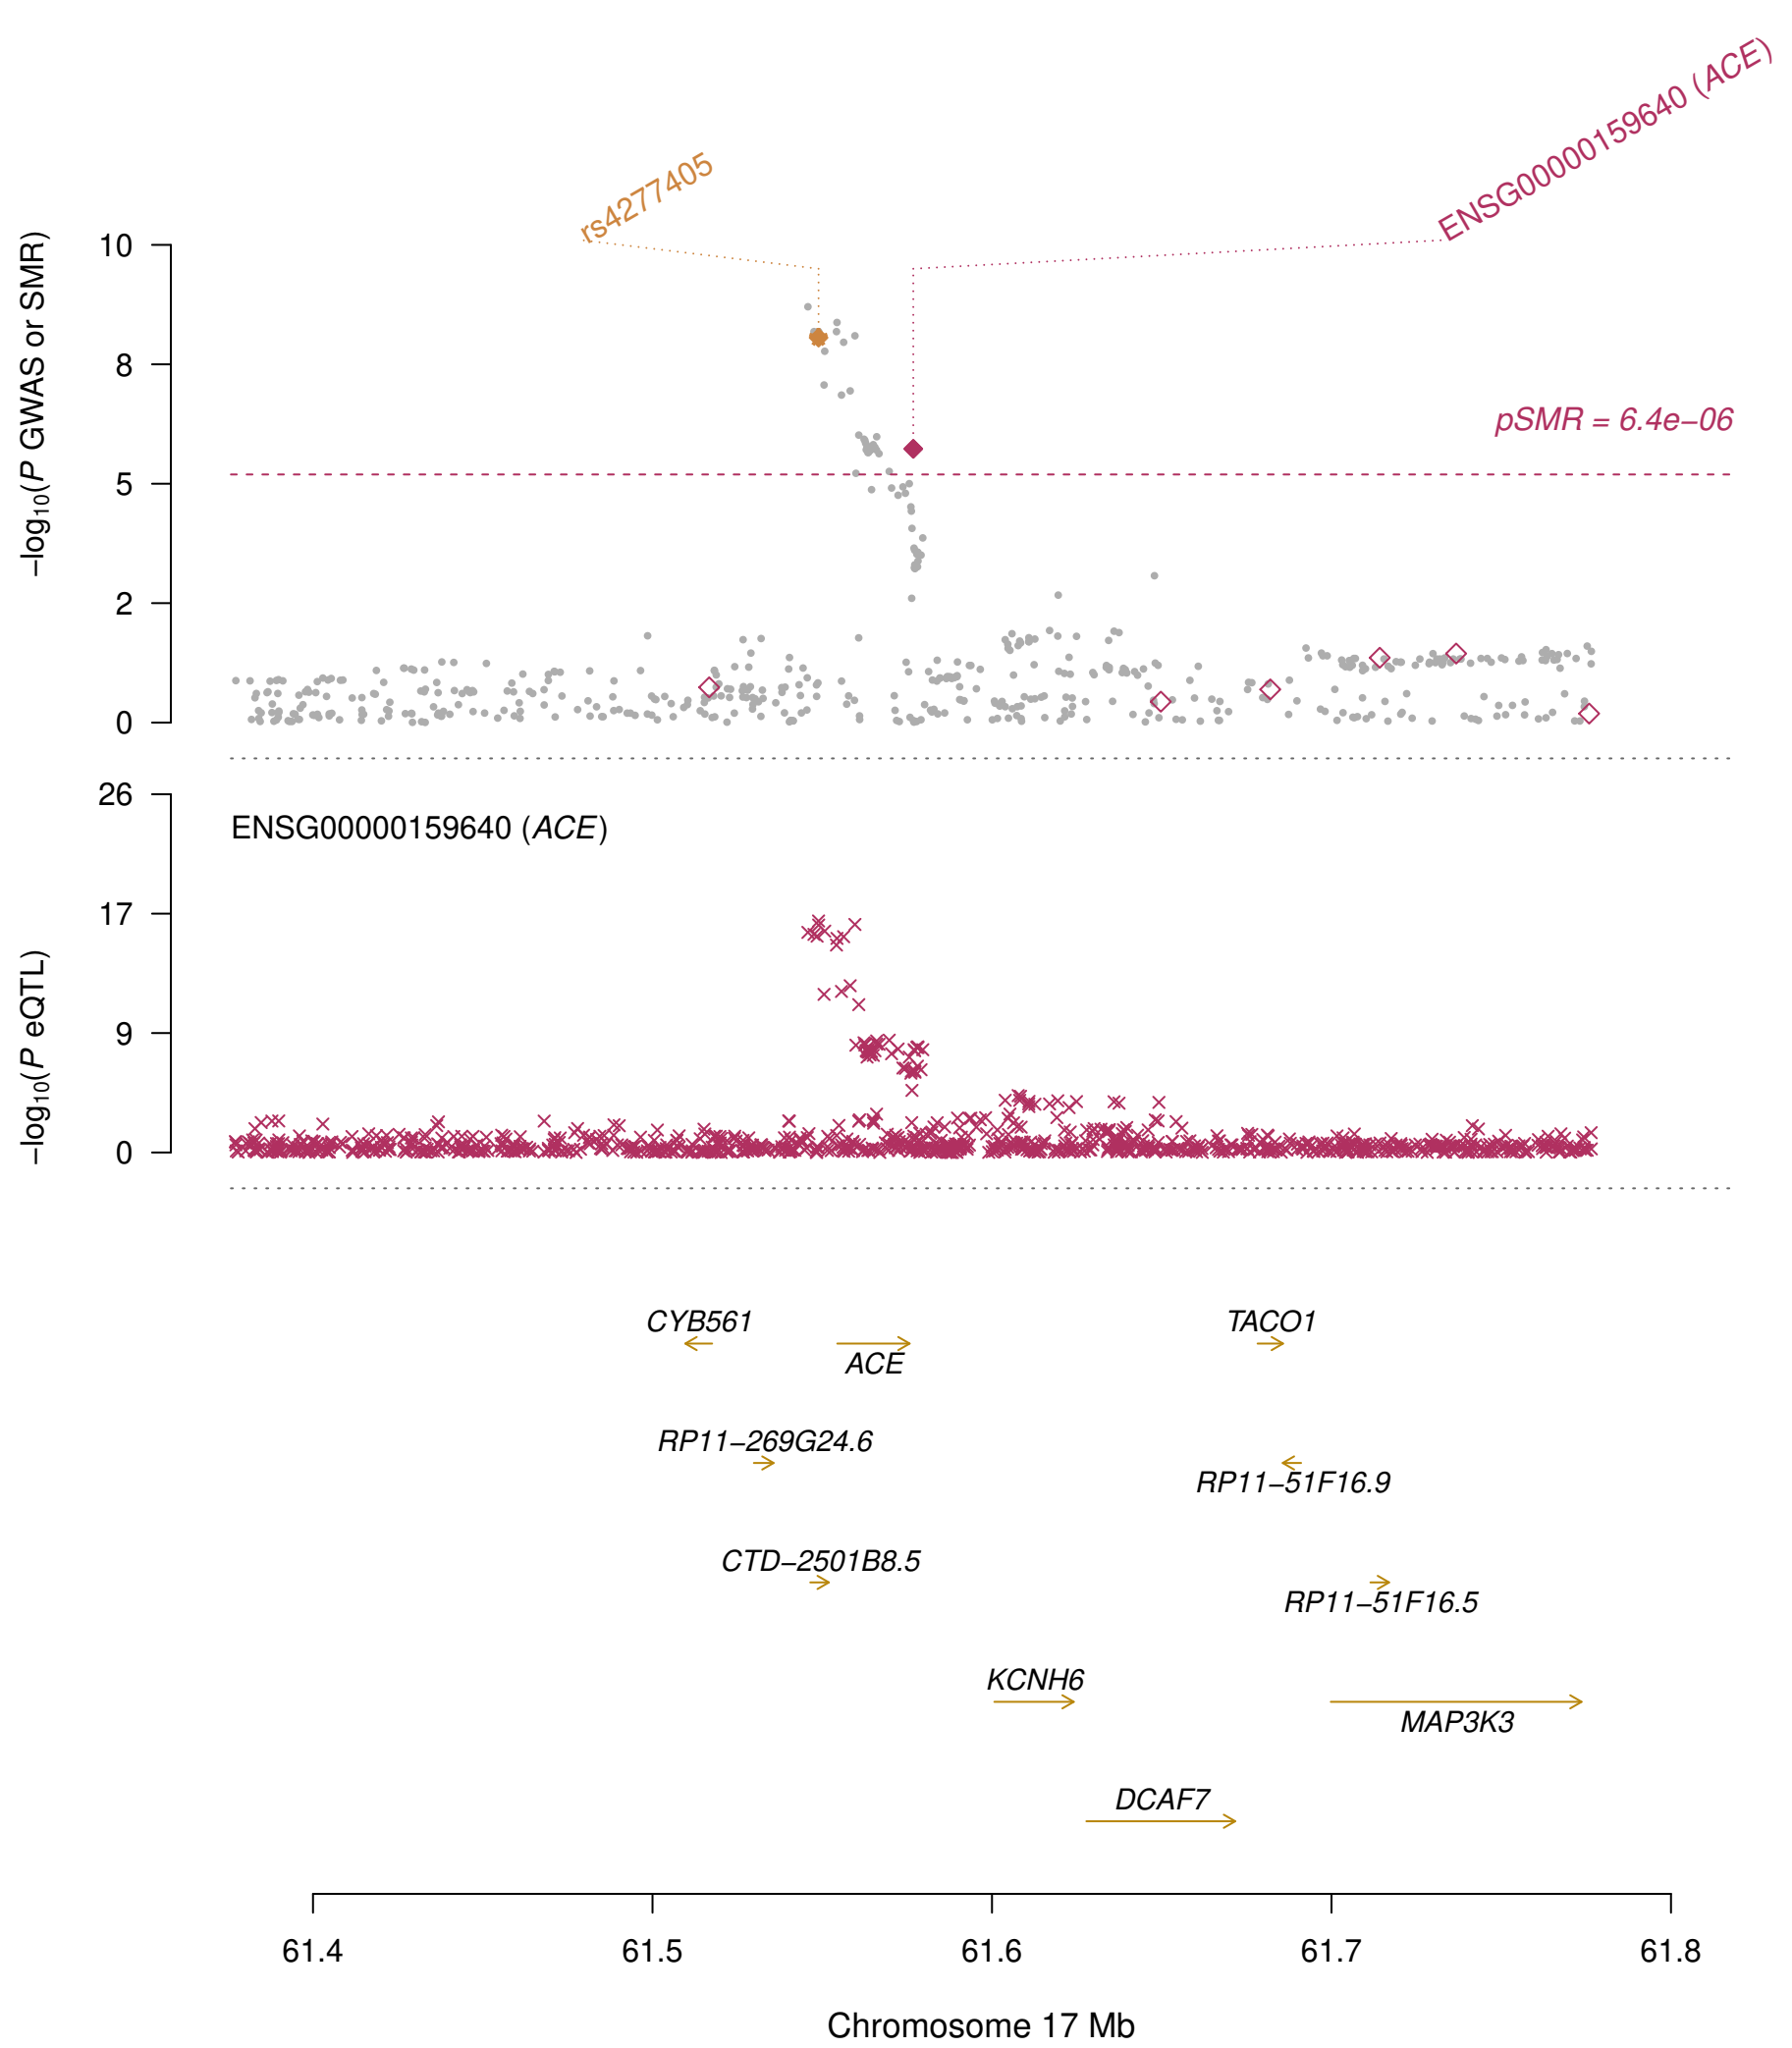

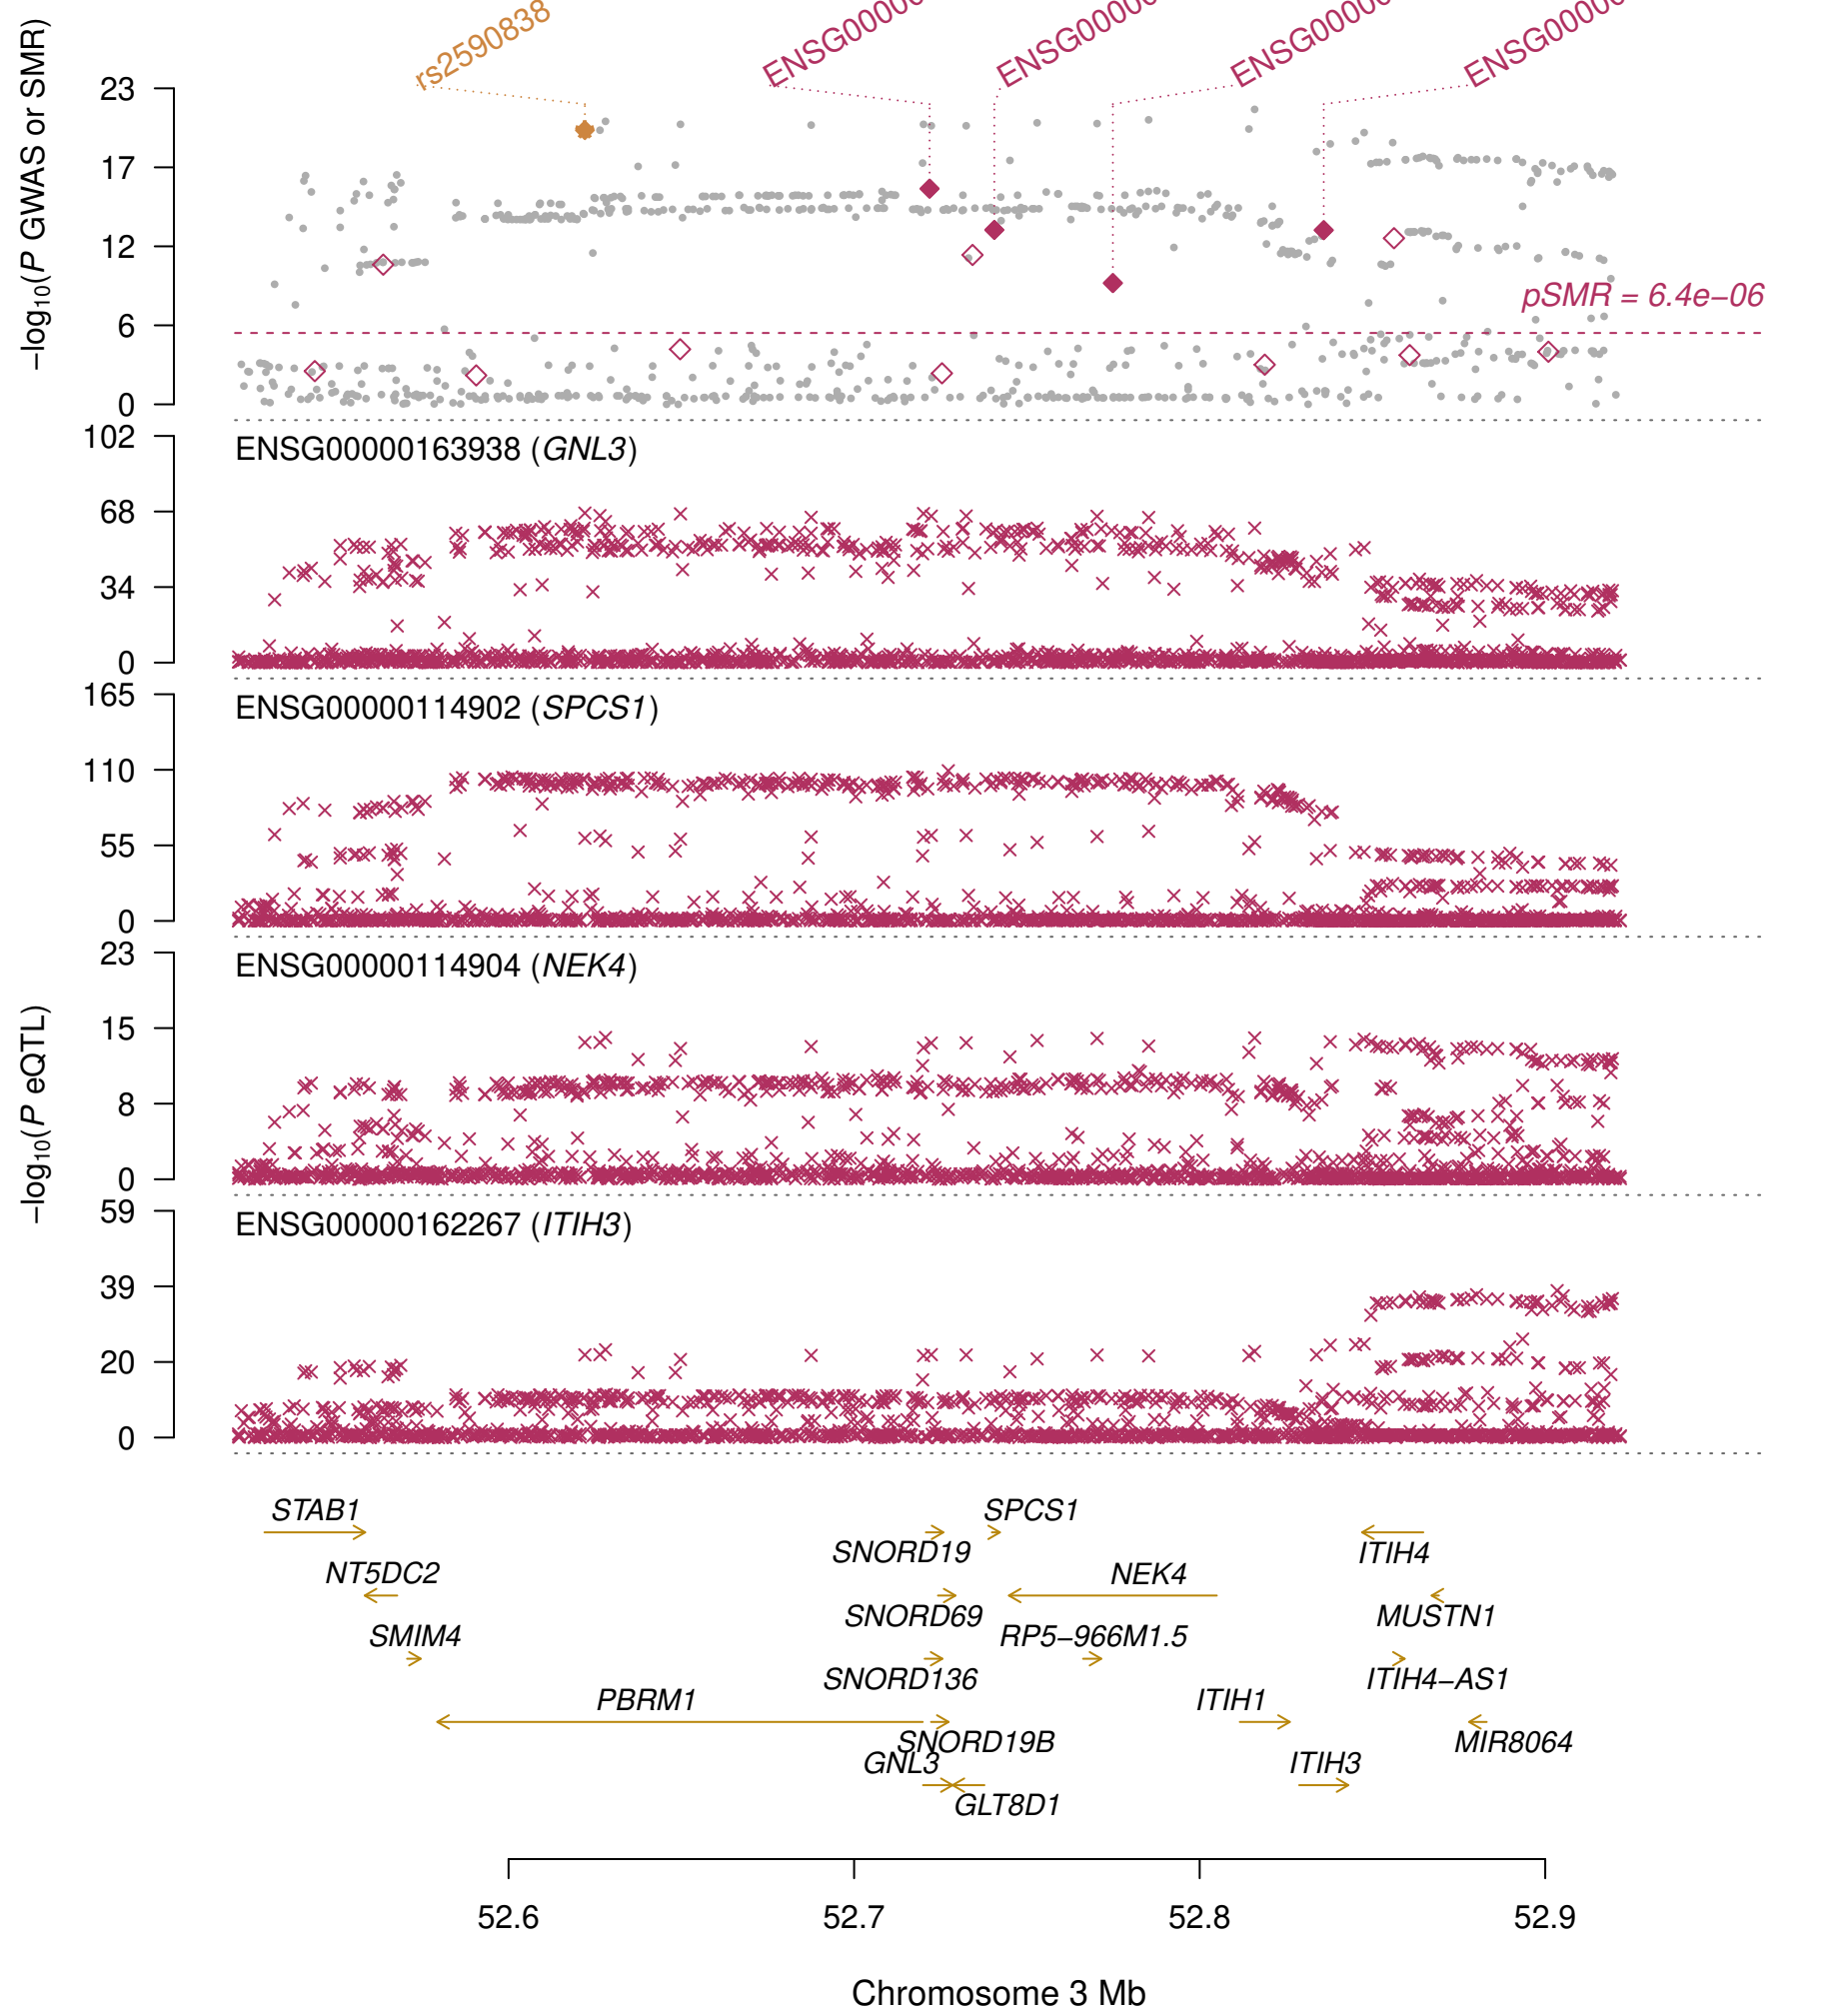

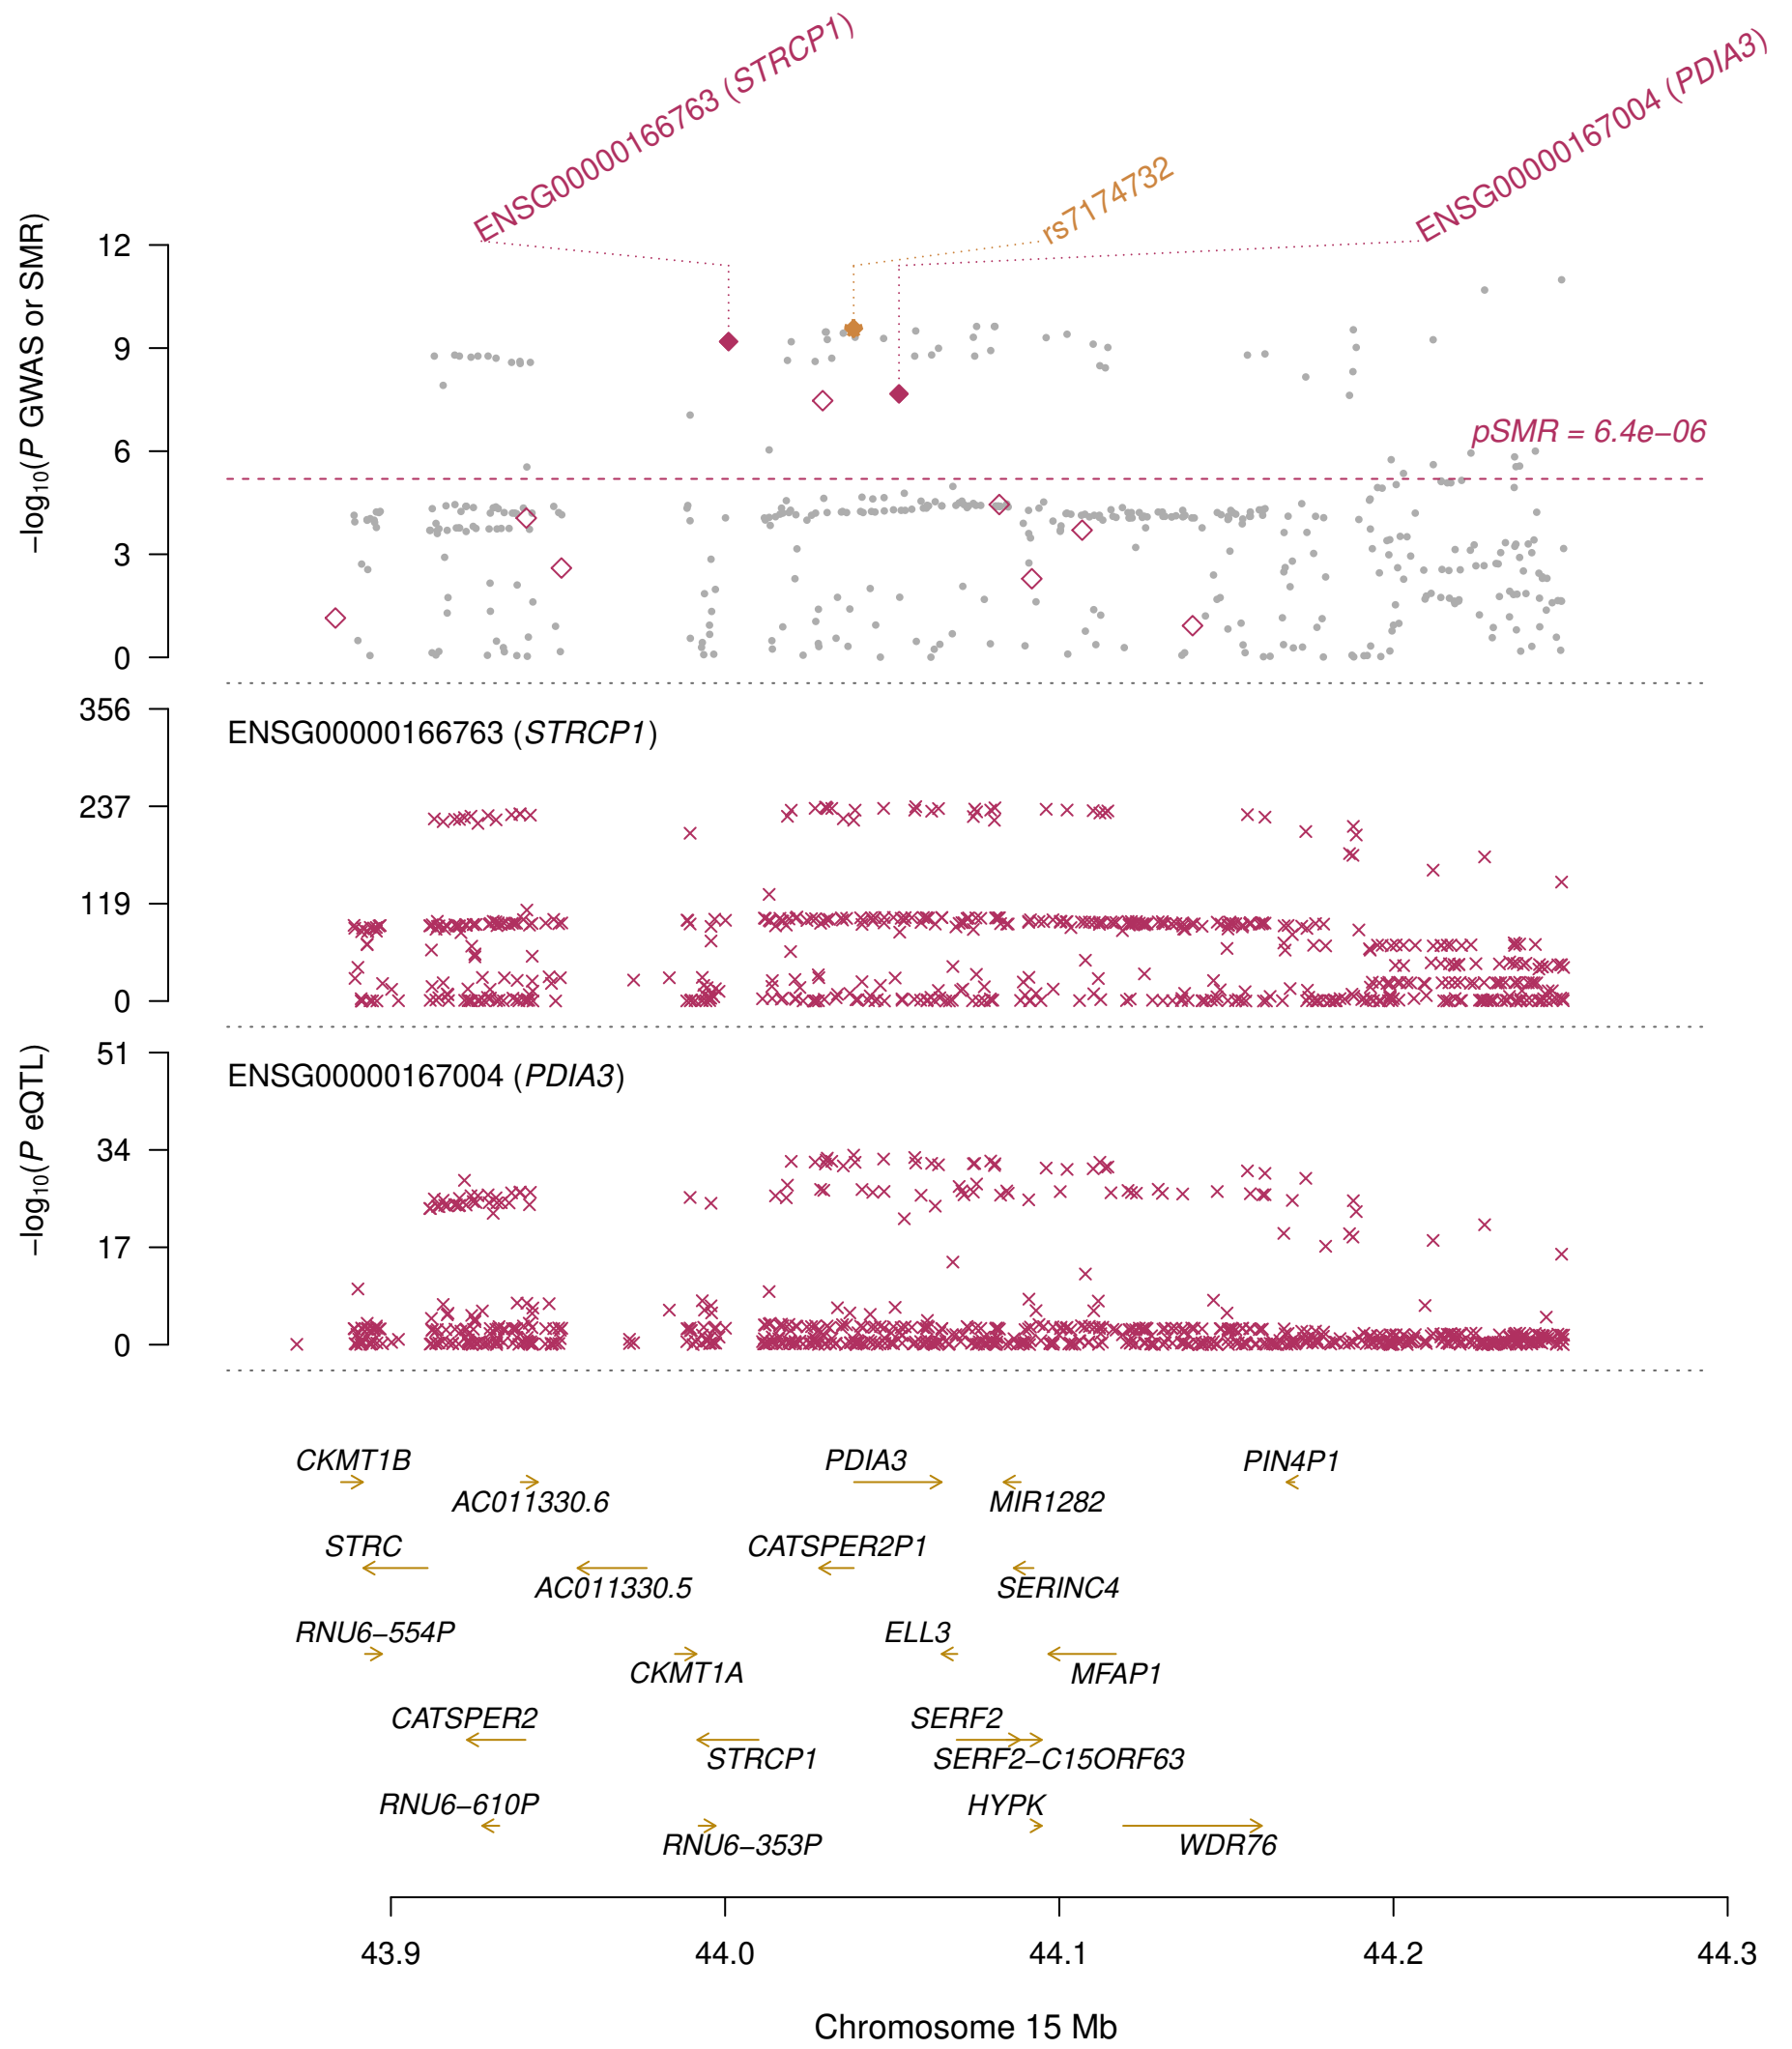

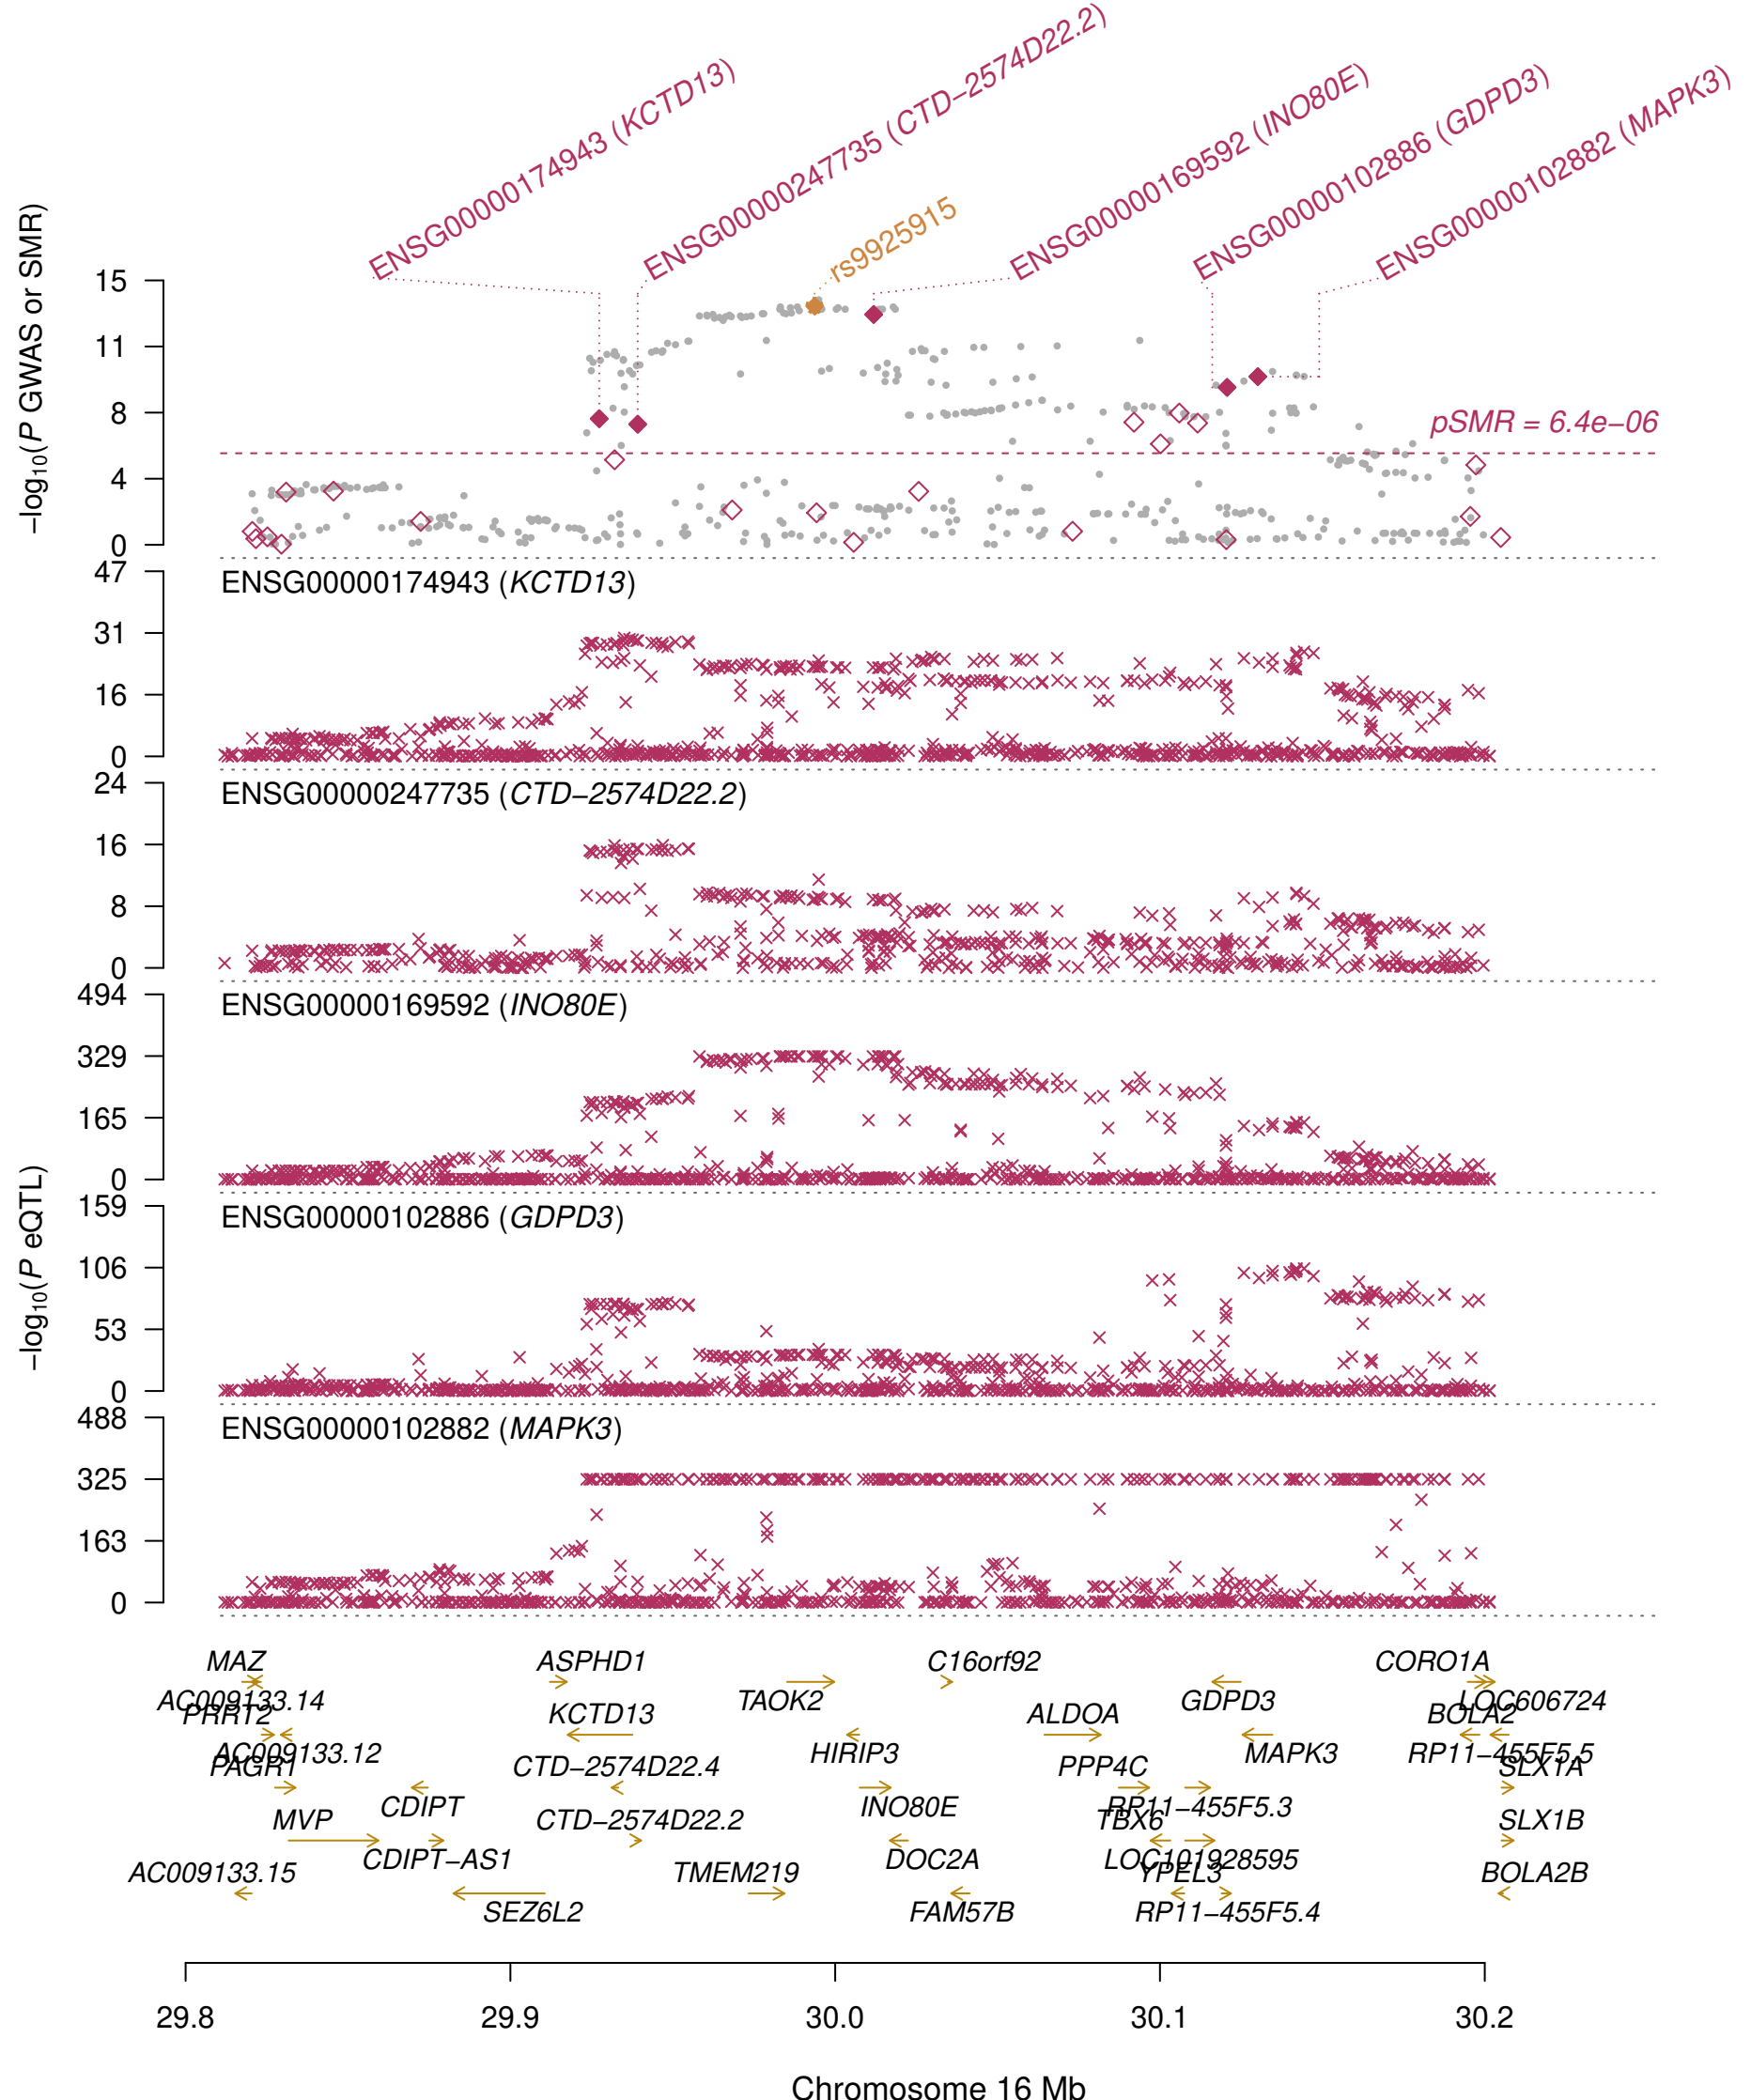



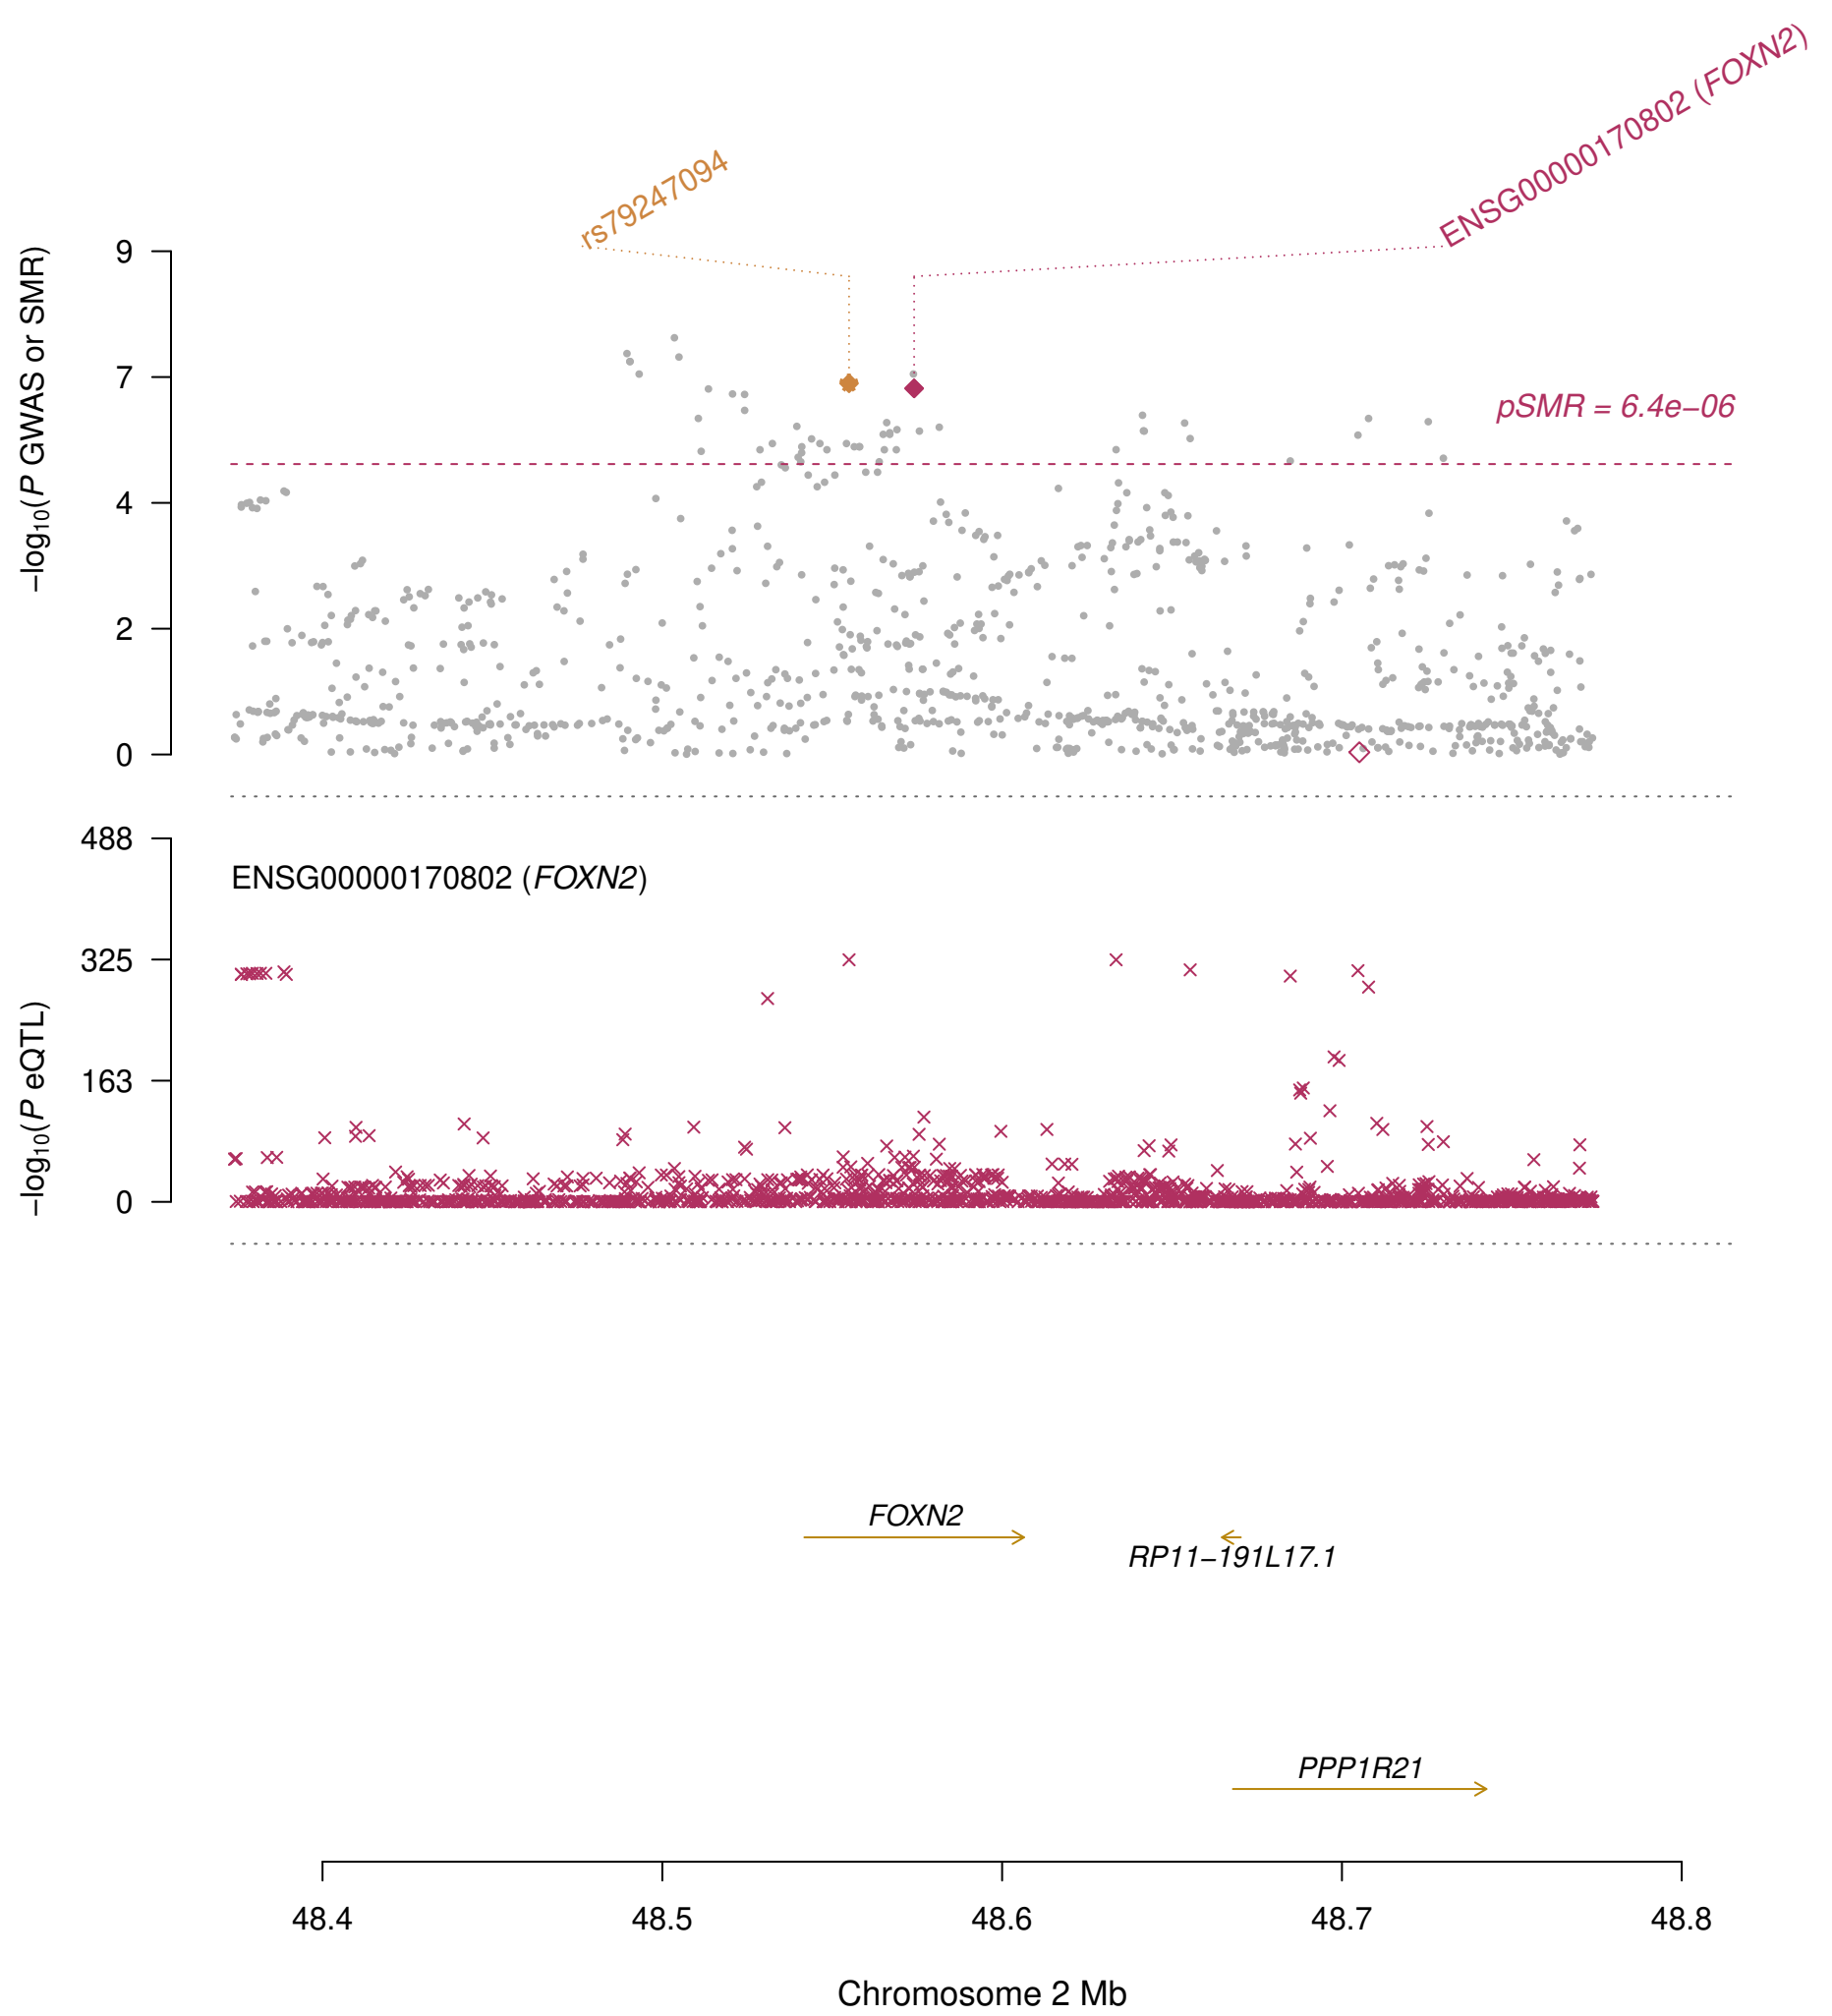

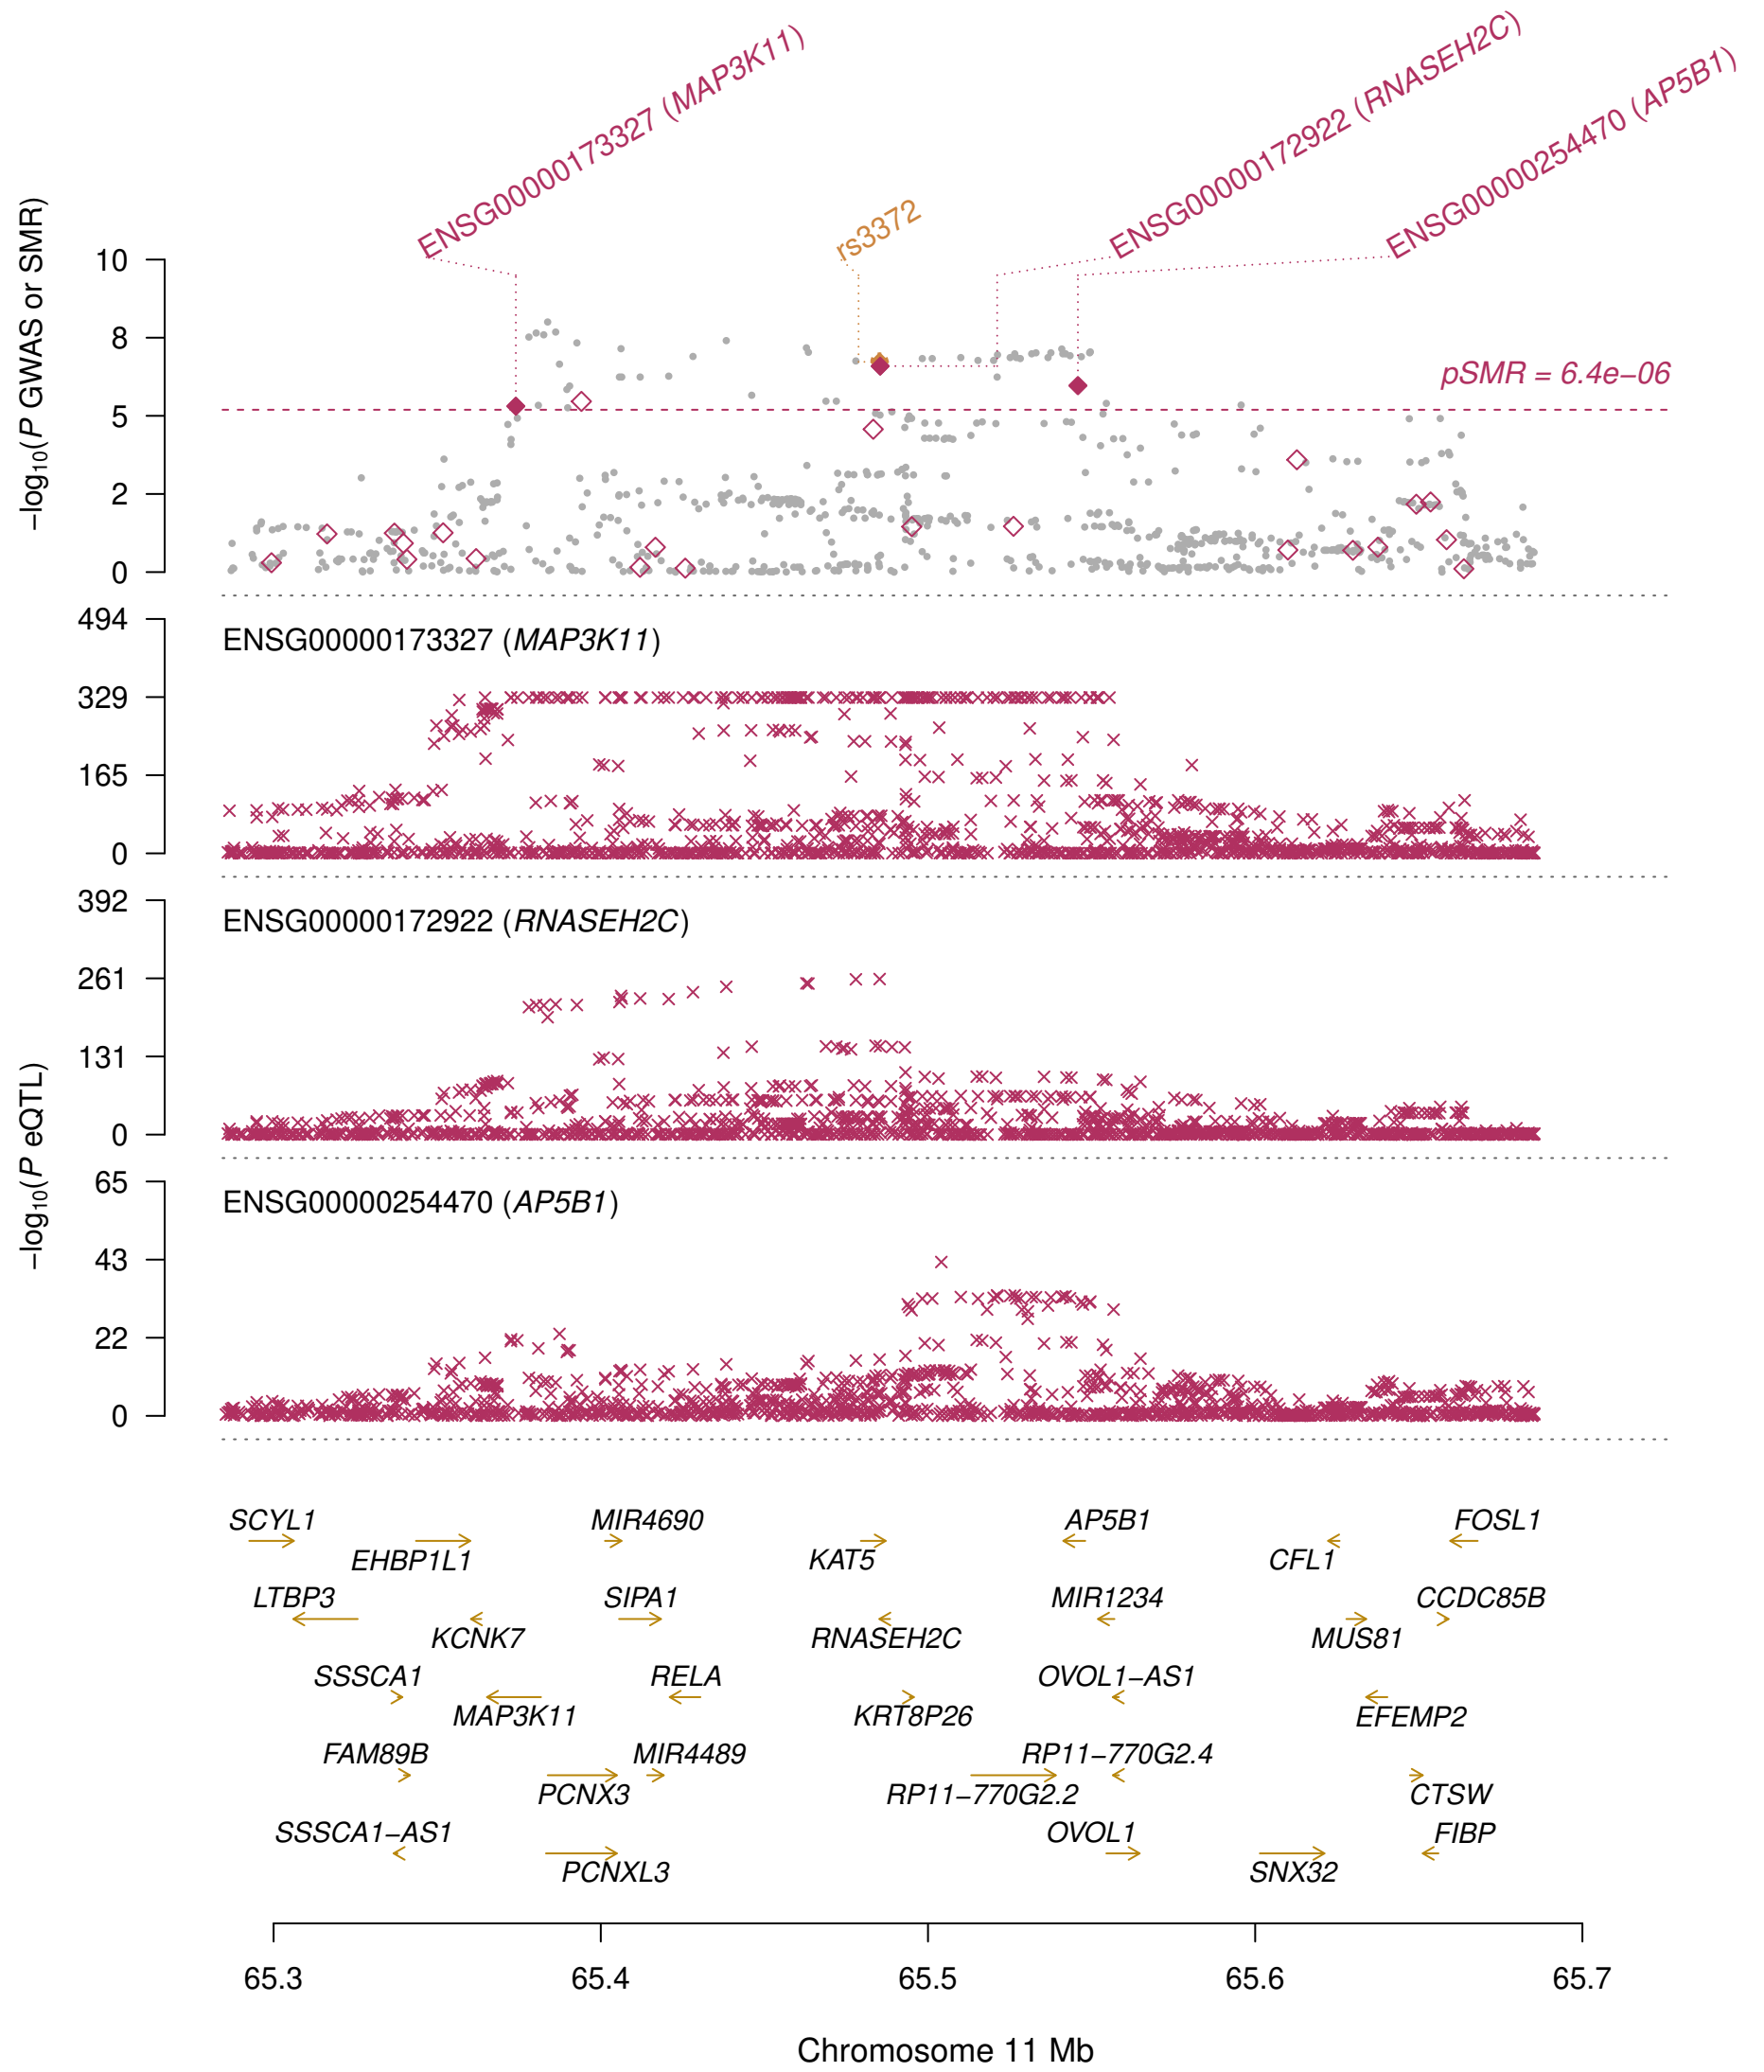

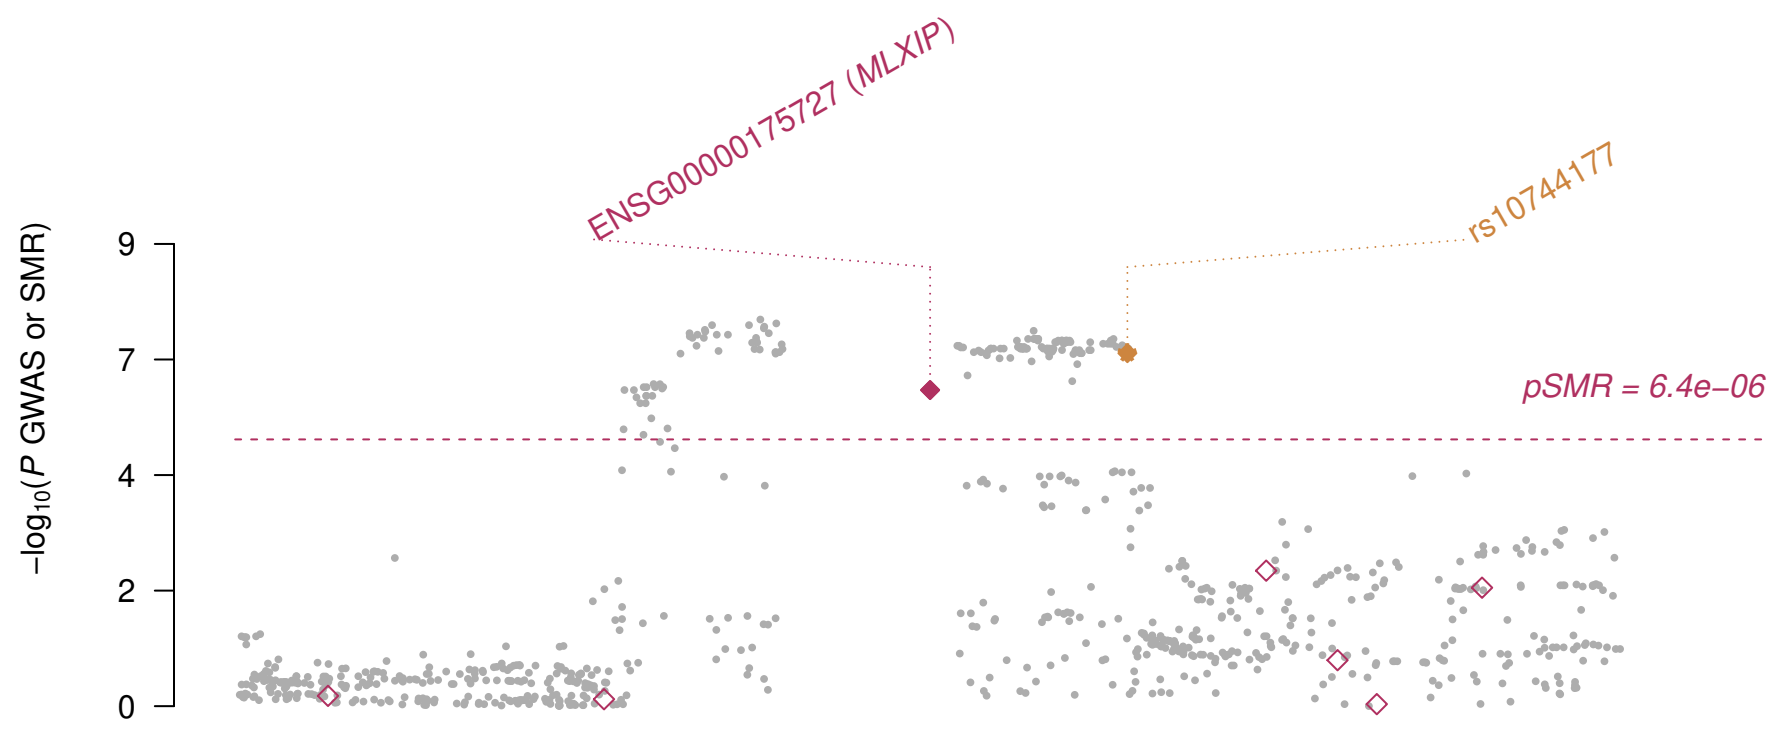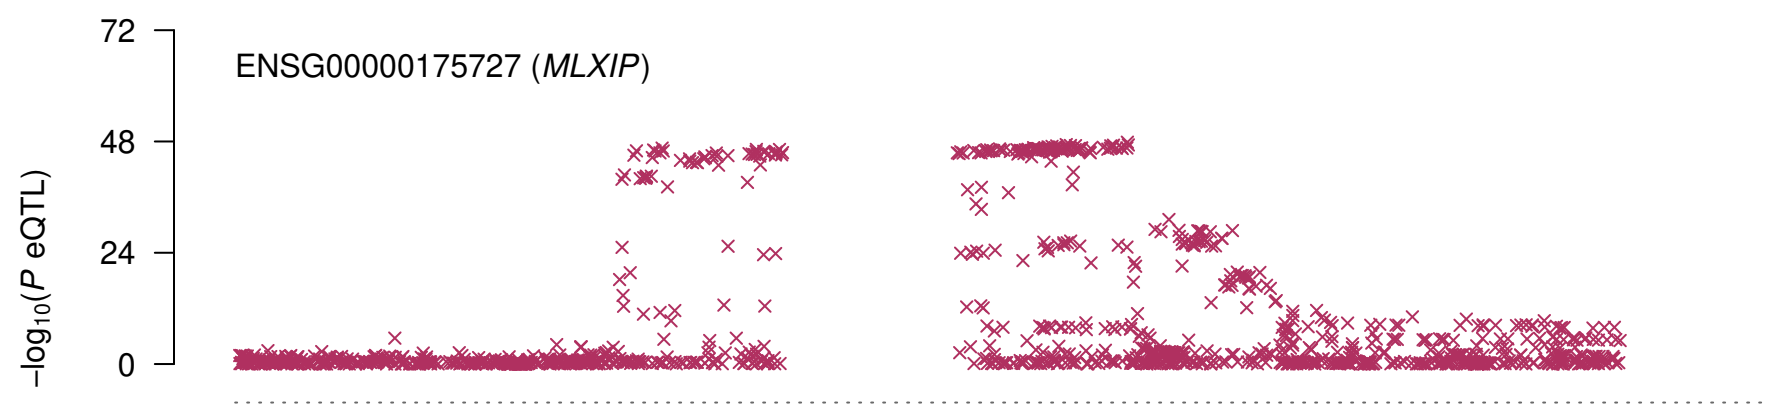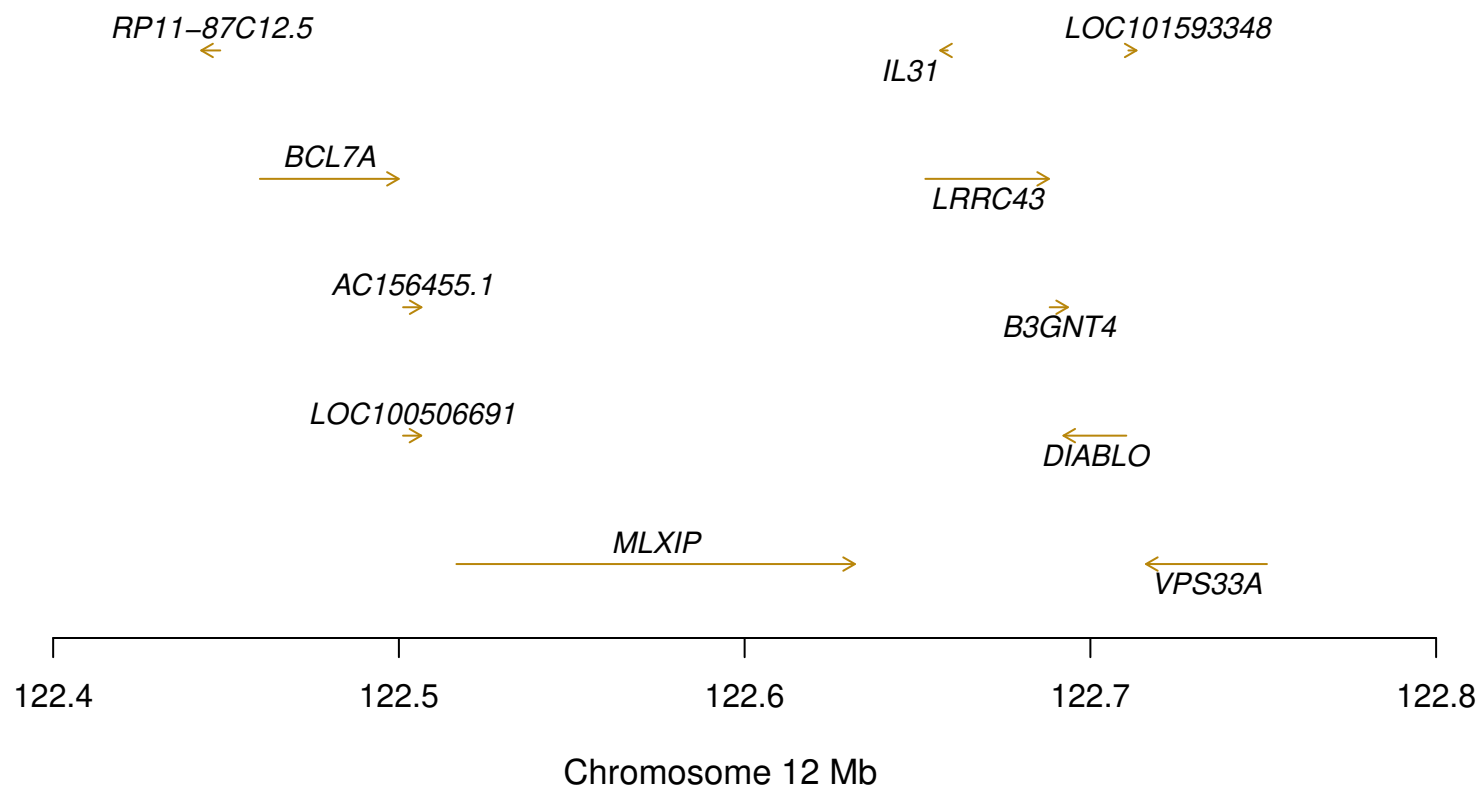

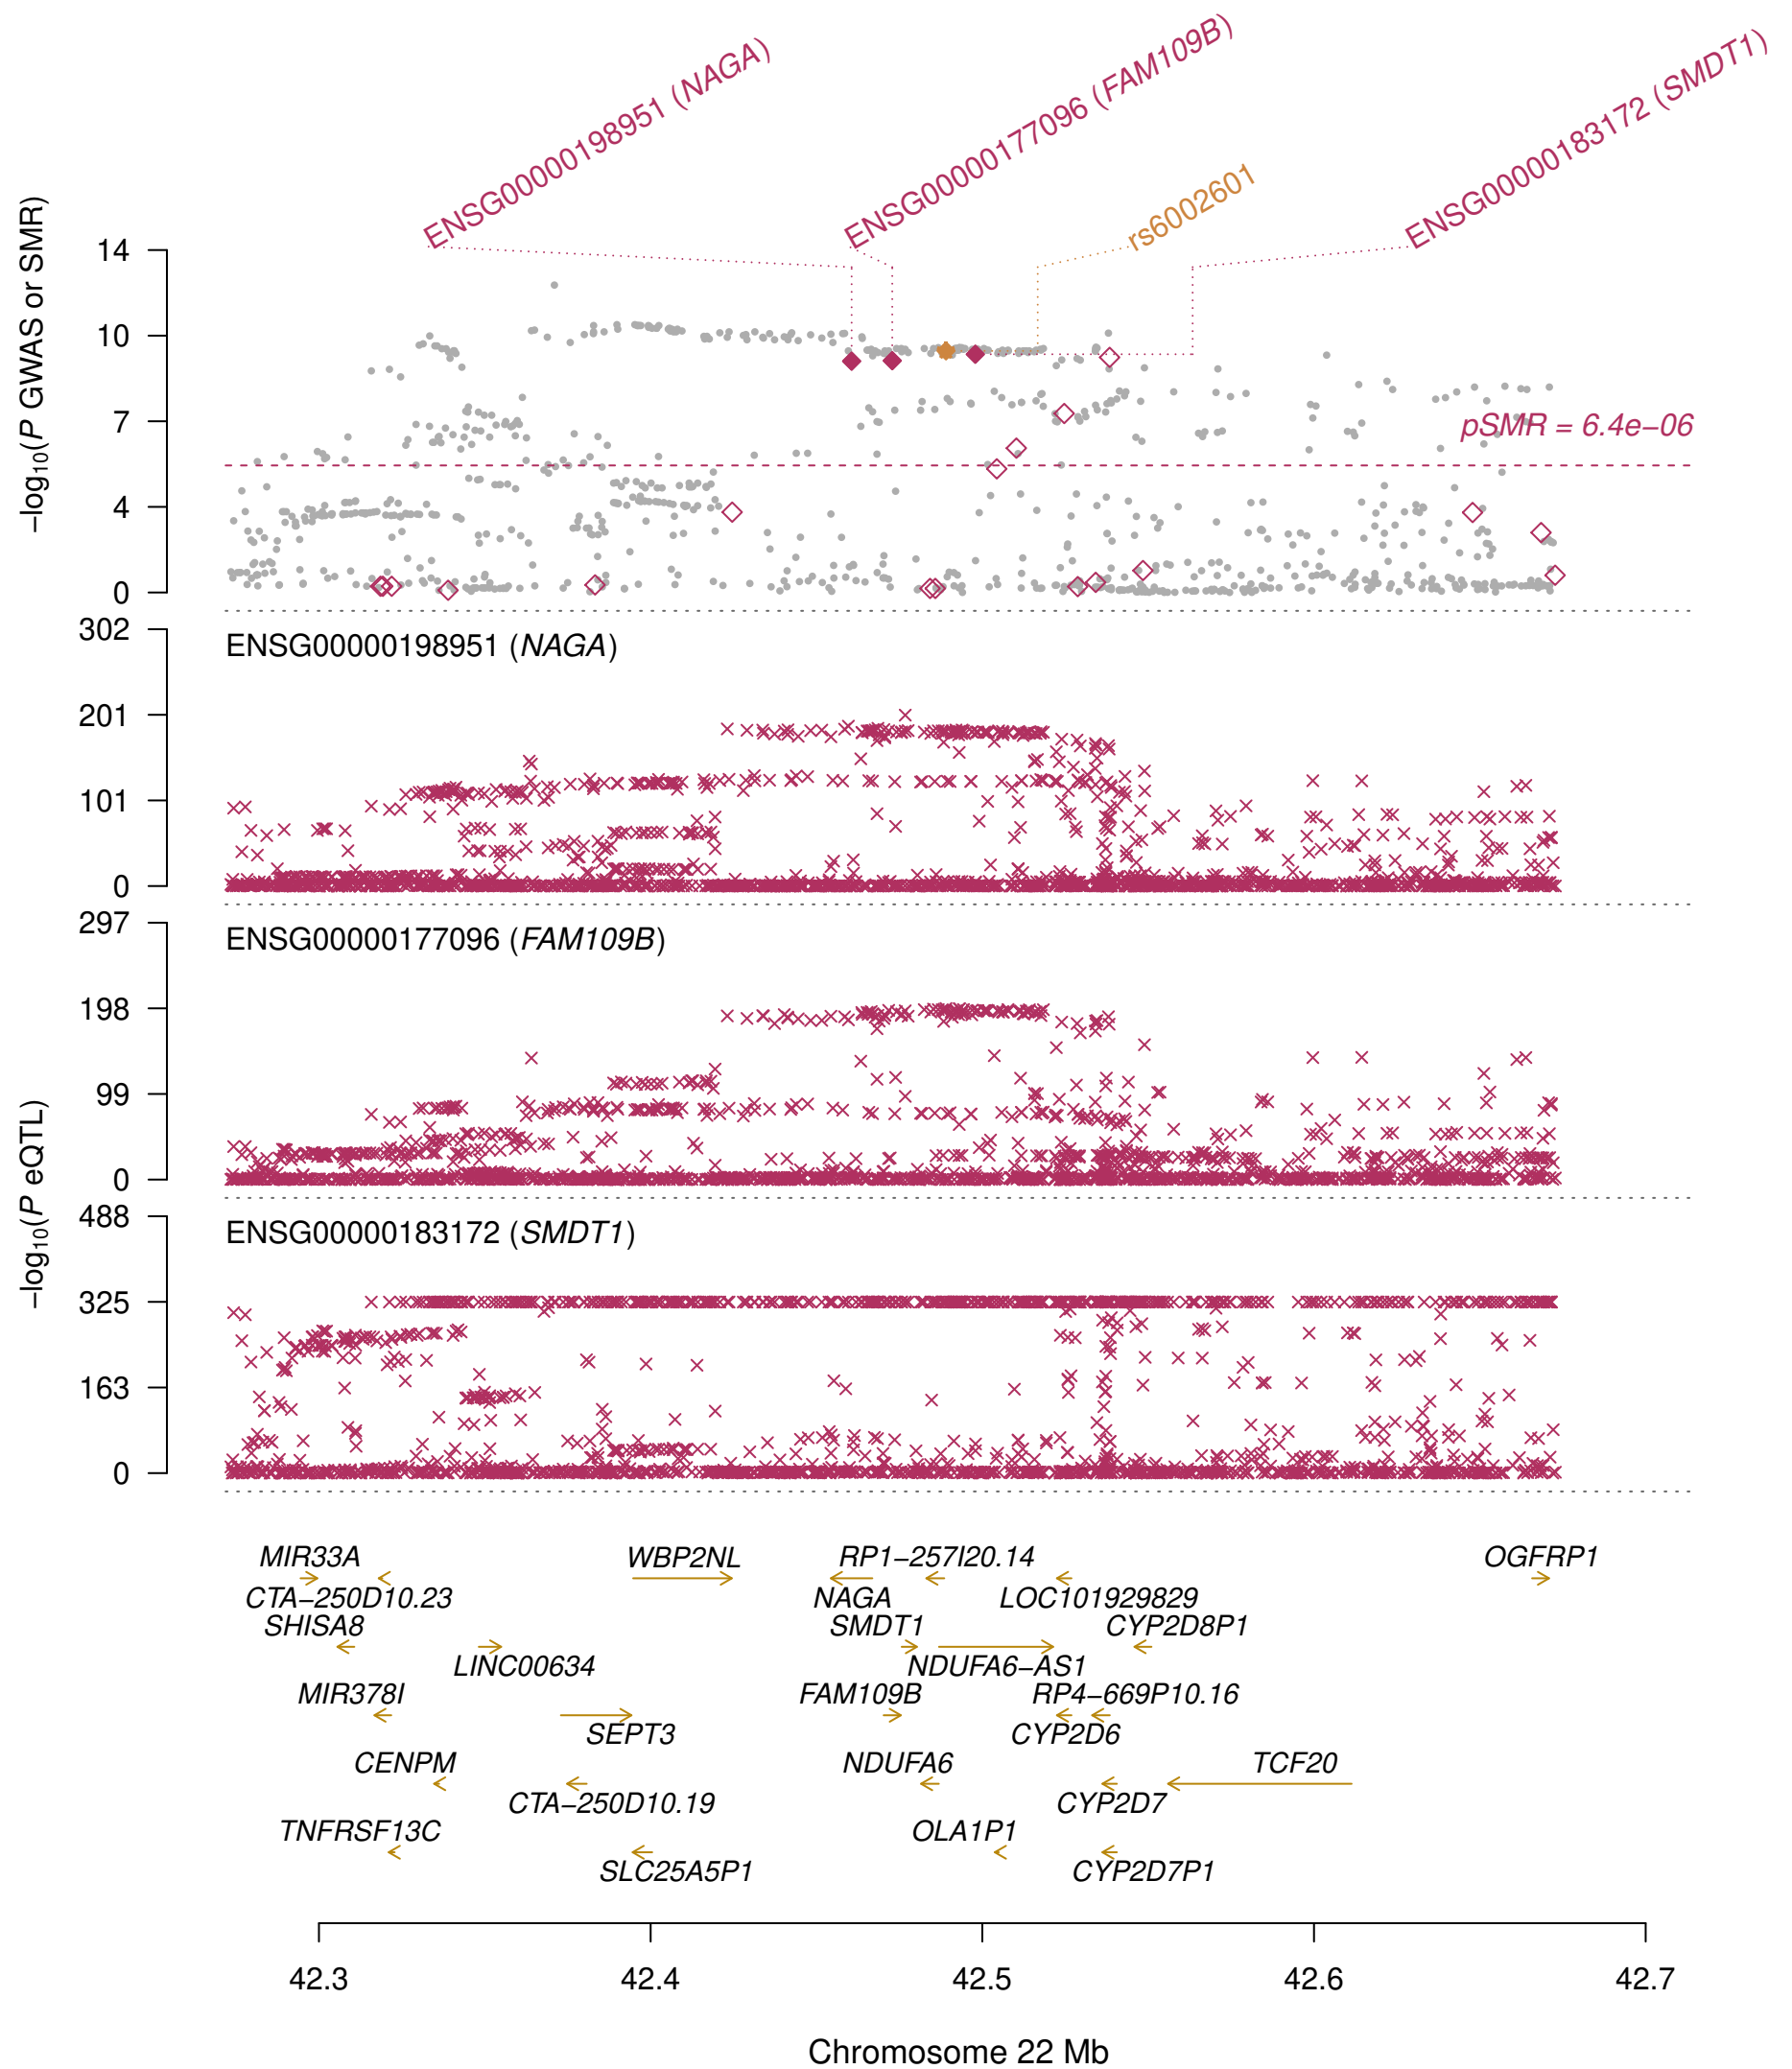

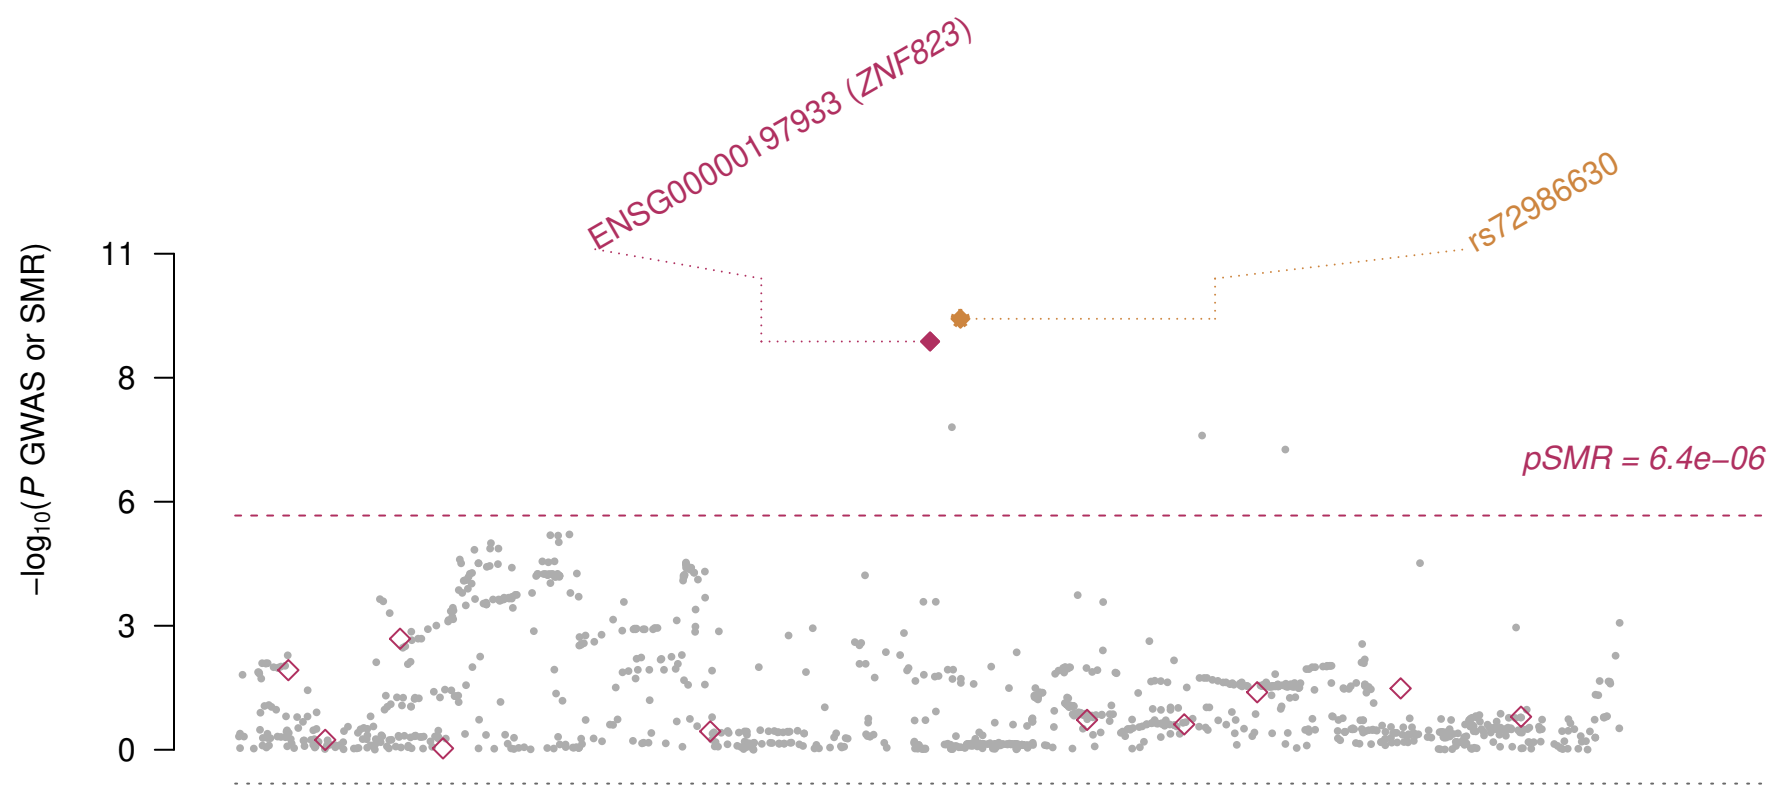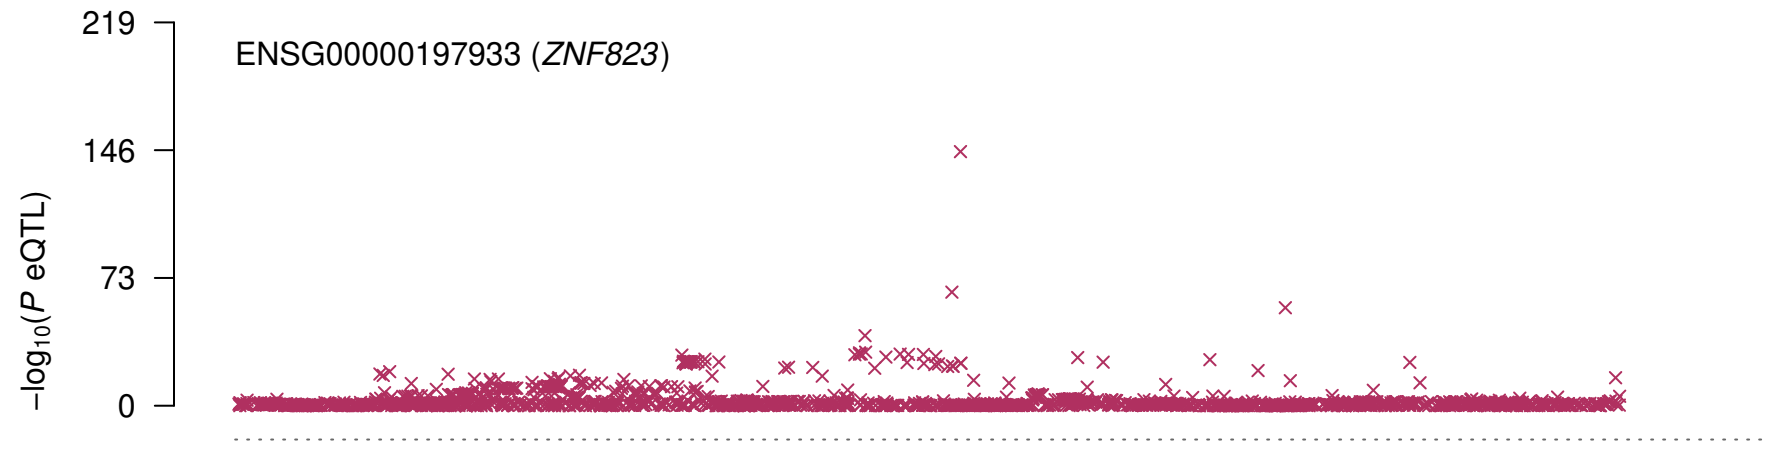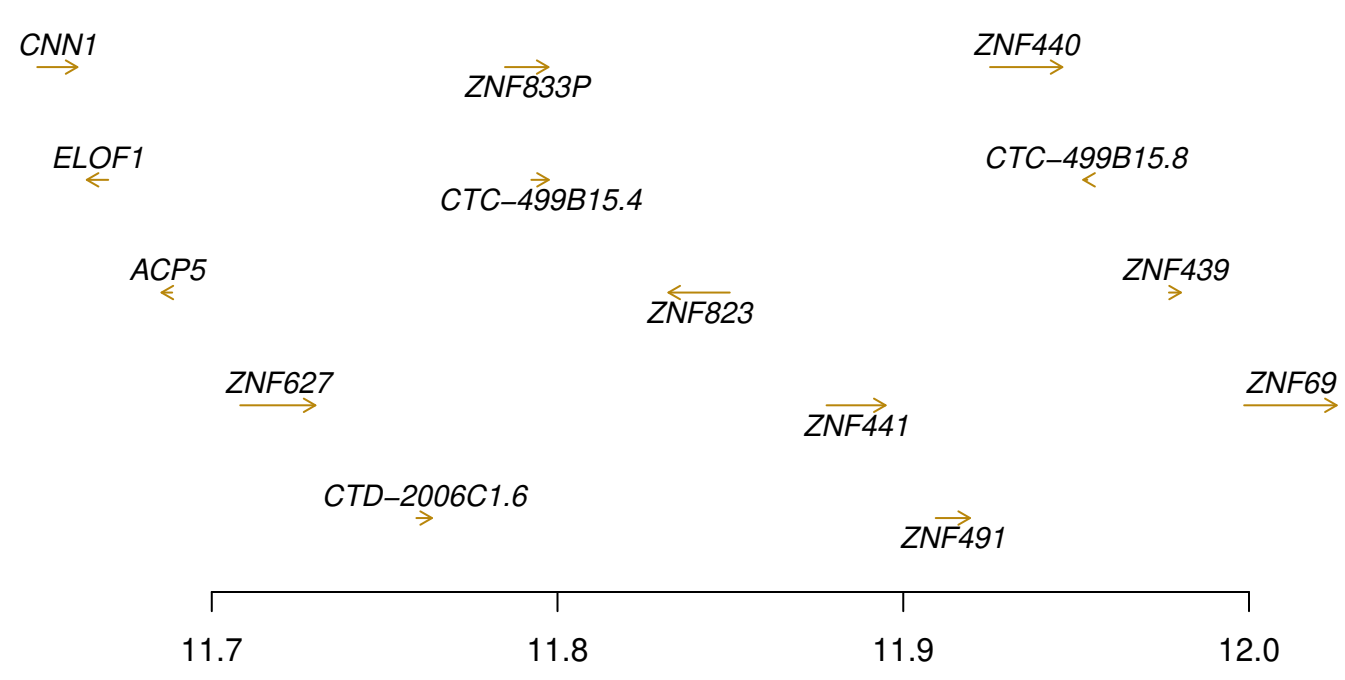

11.7 11.8 11.9 12.0

Chromosome 19 Mb

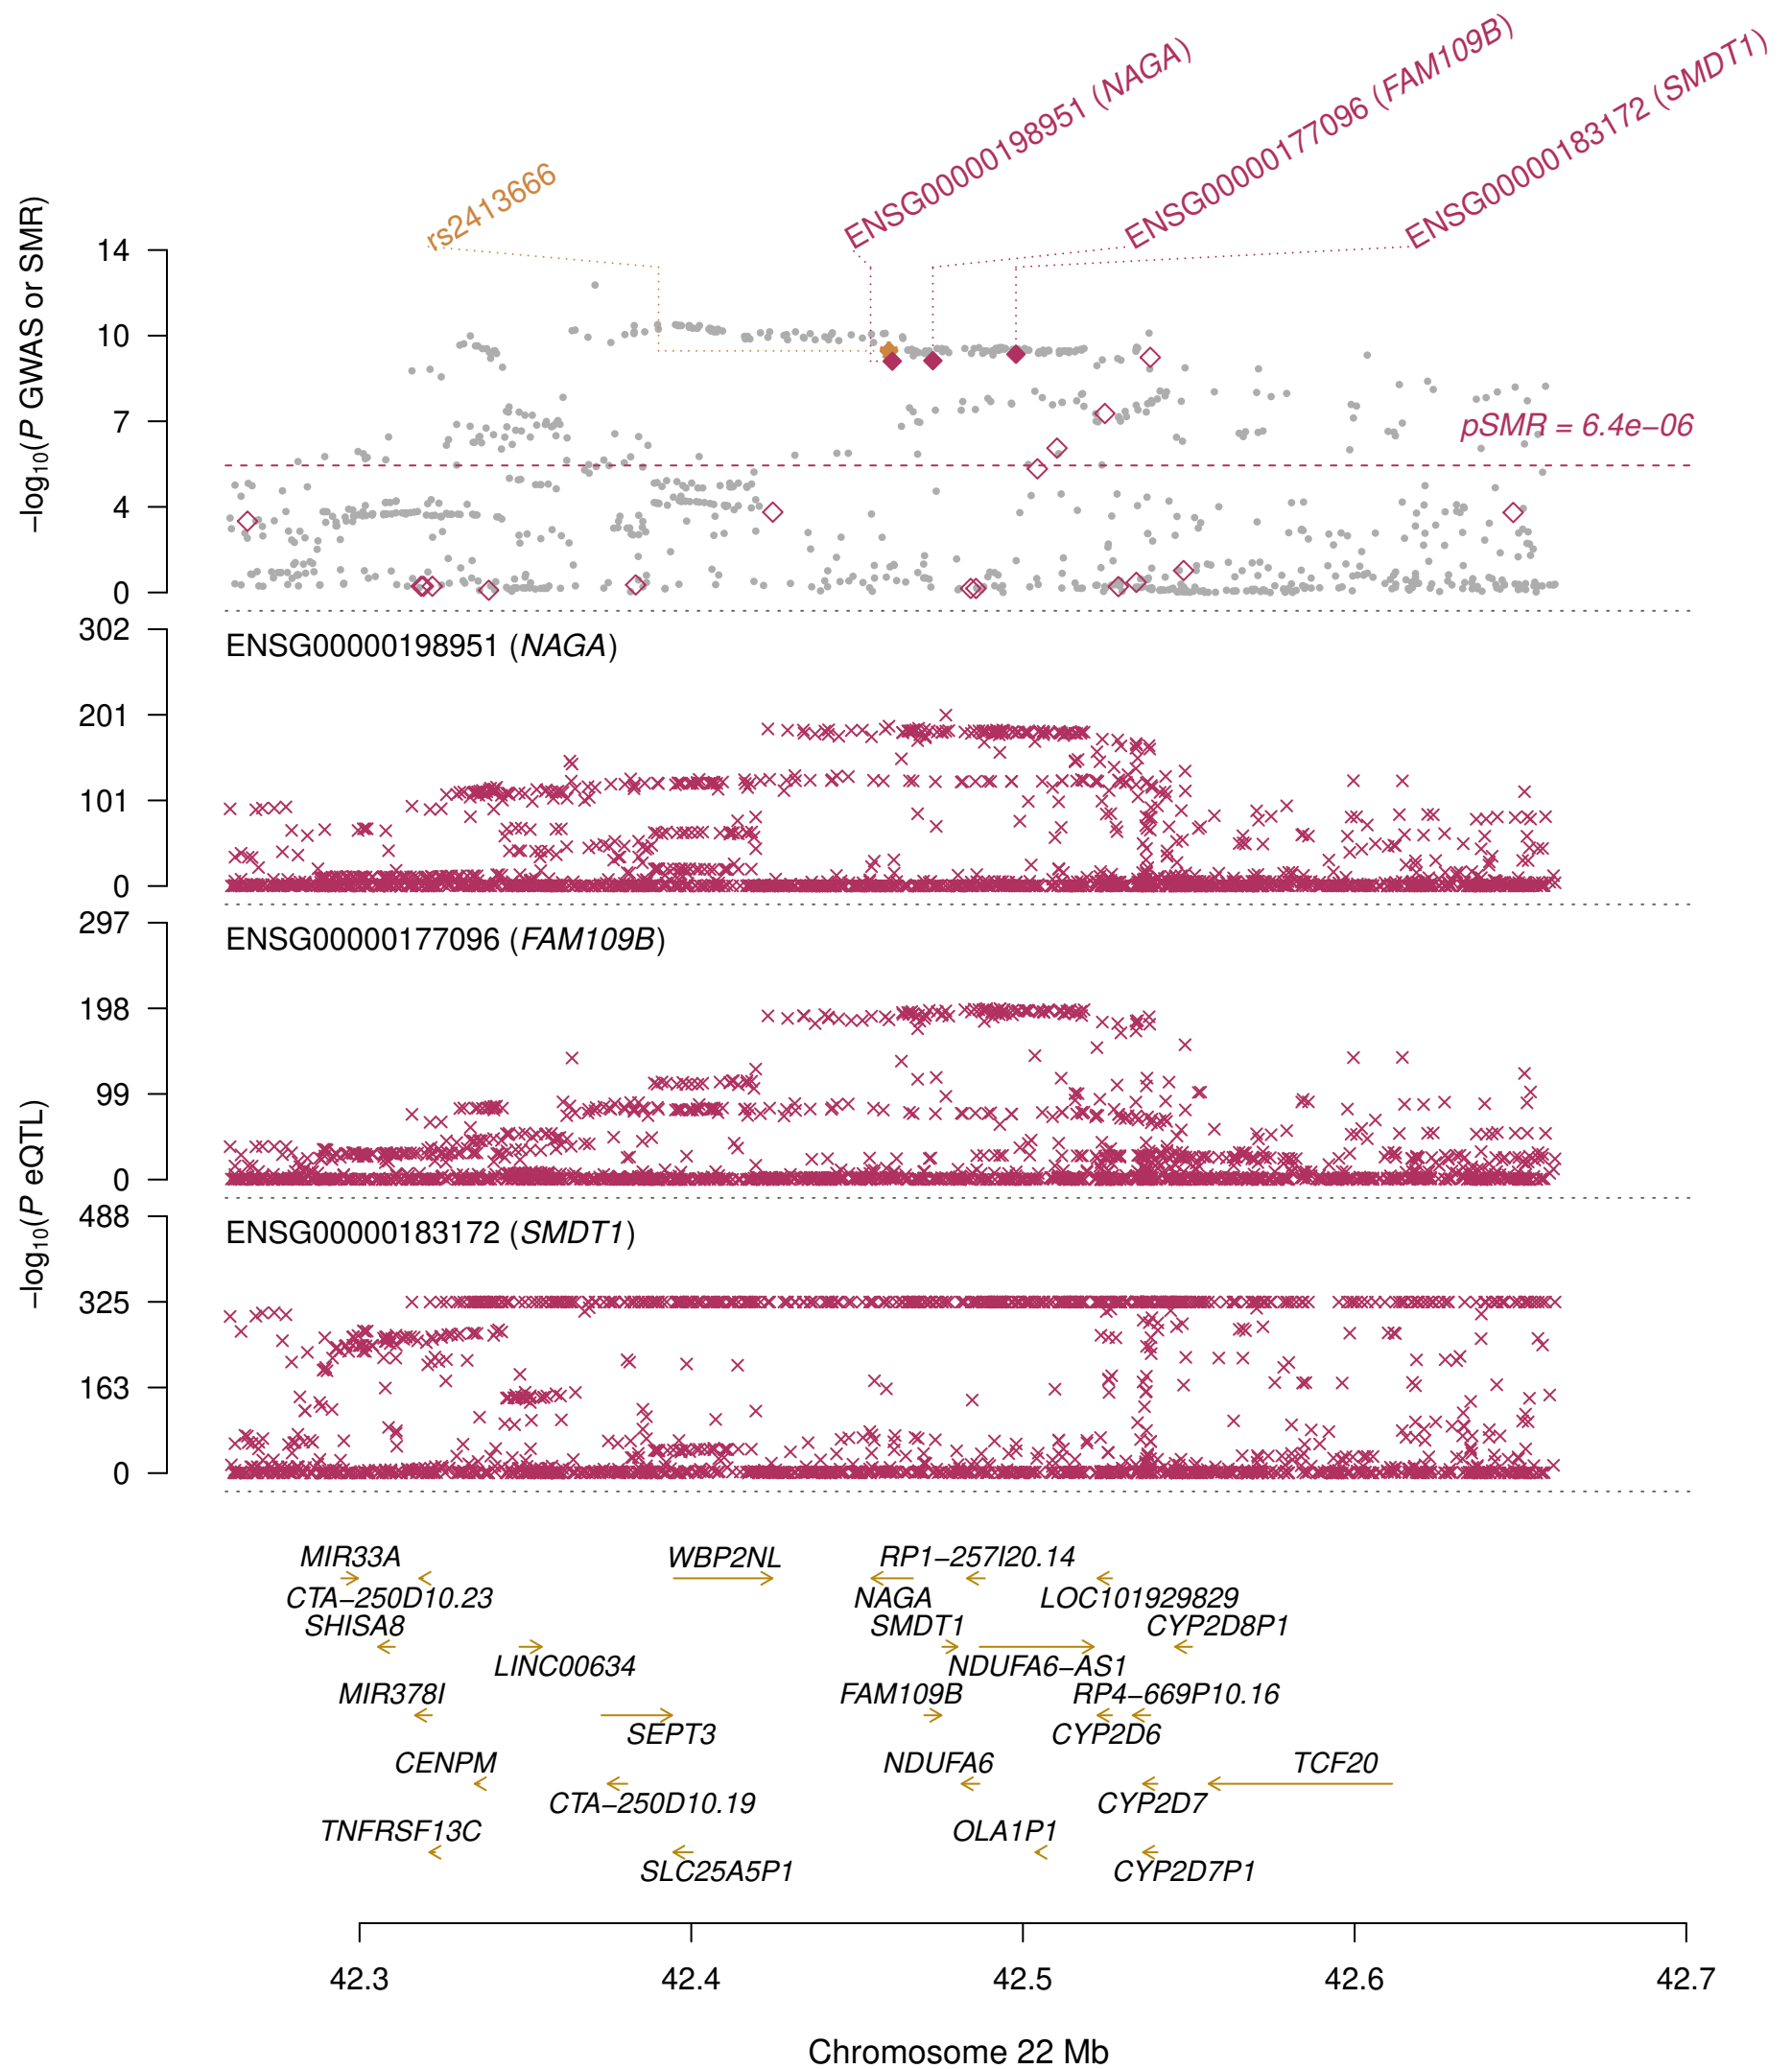

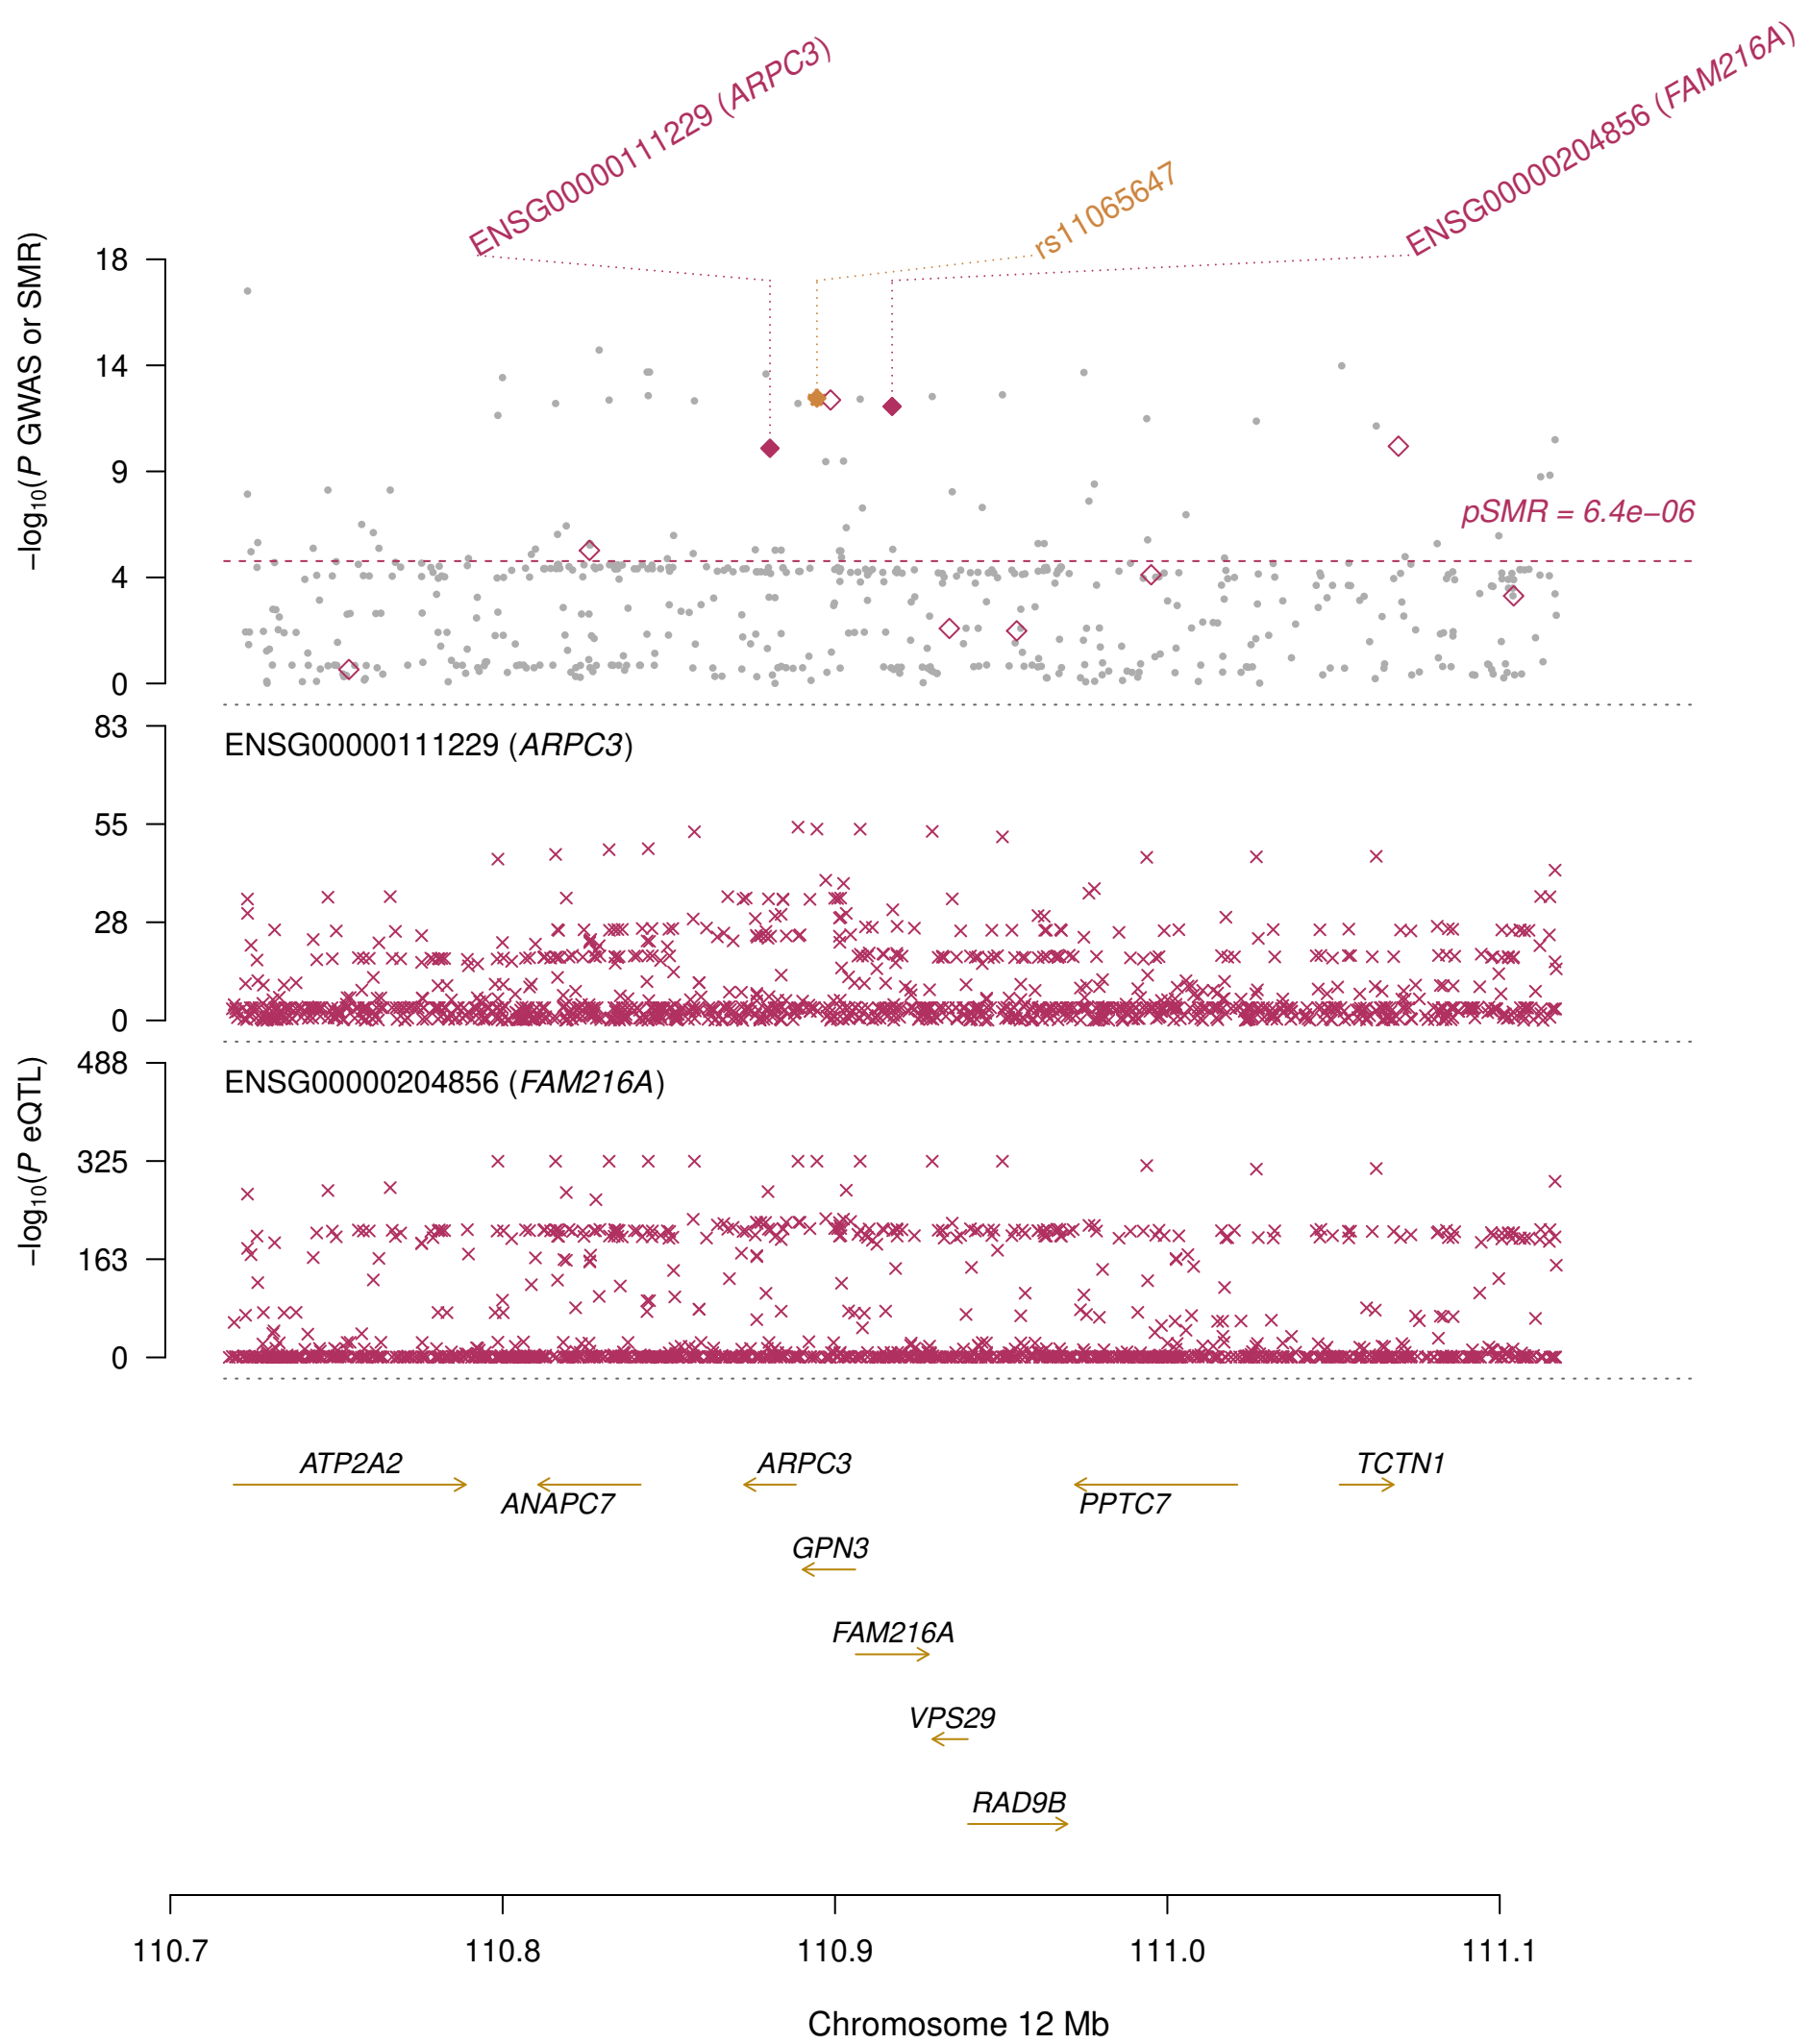

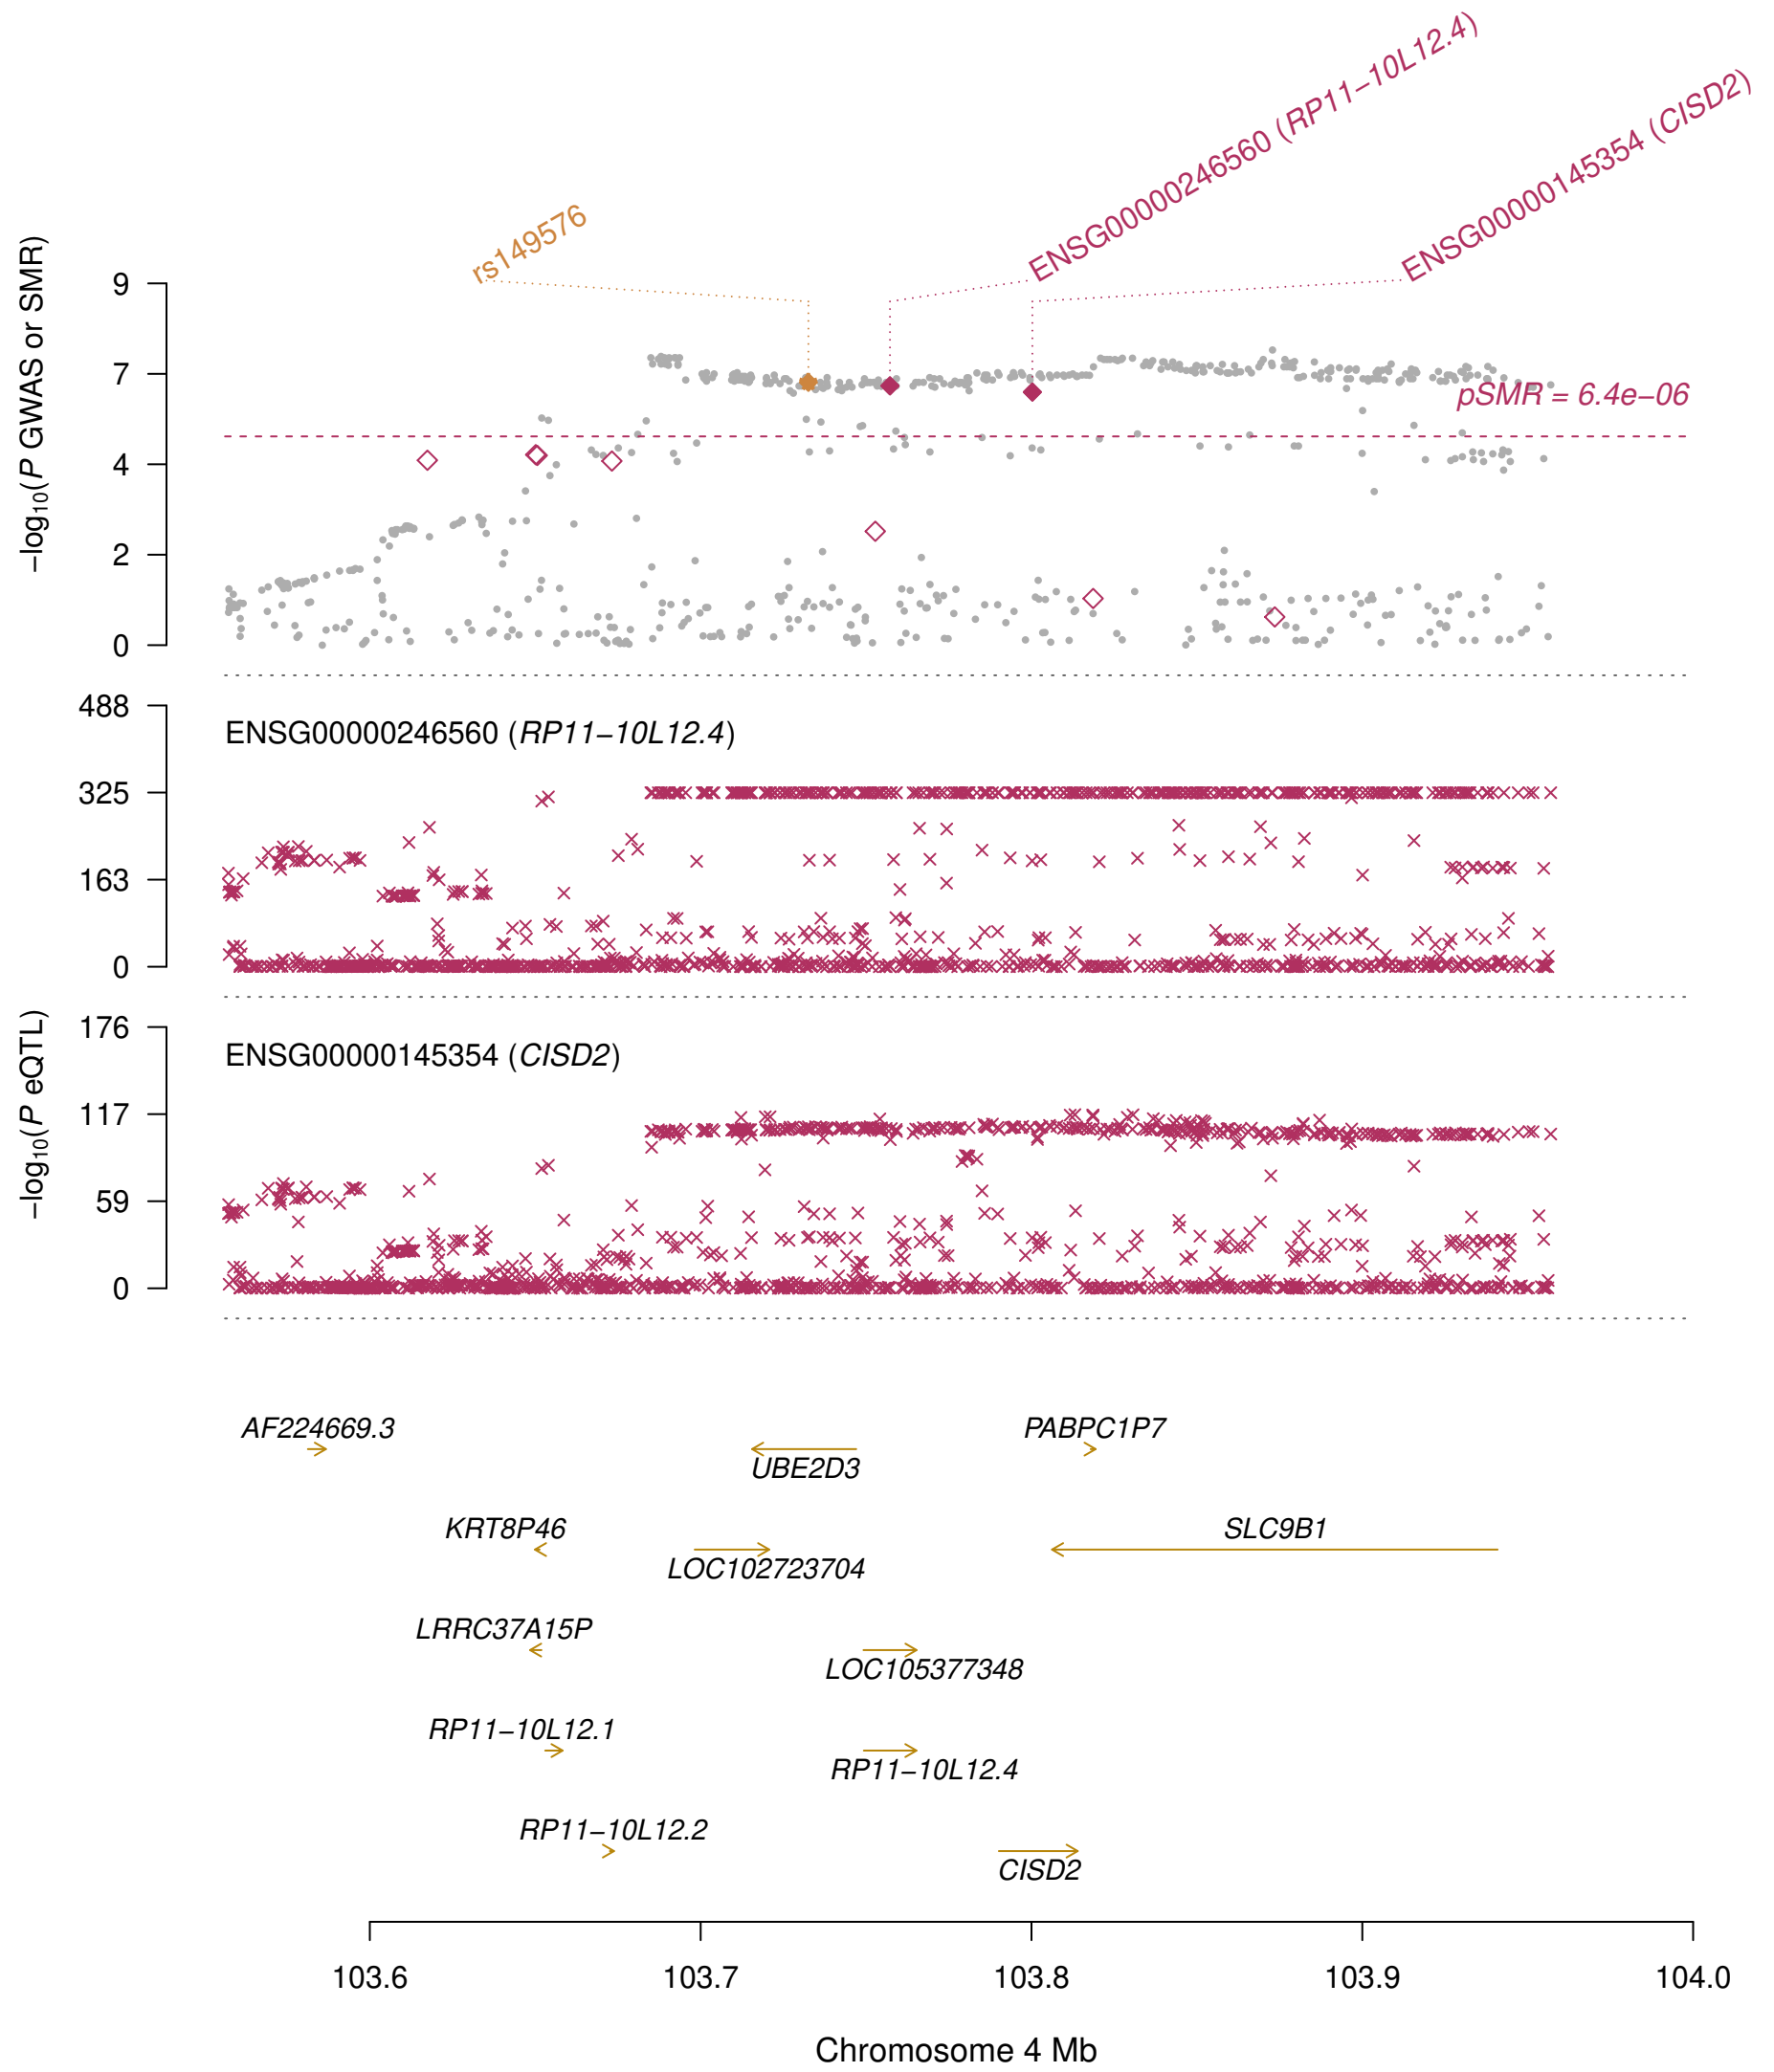



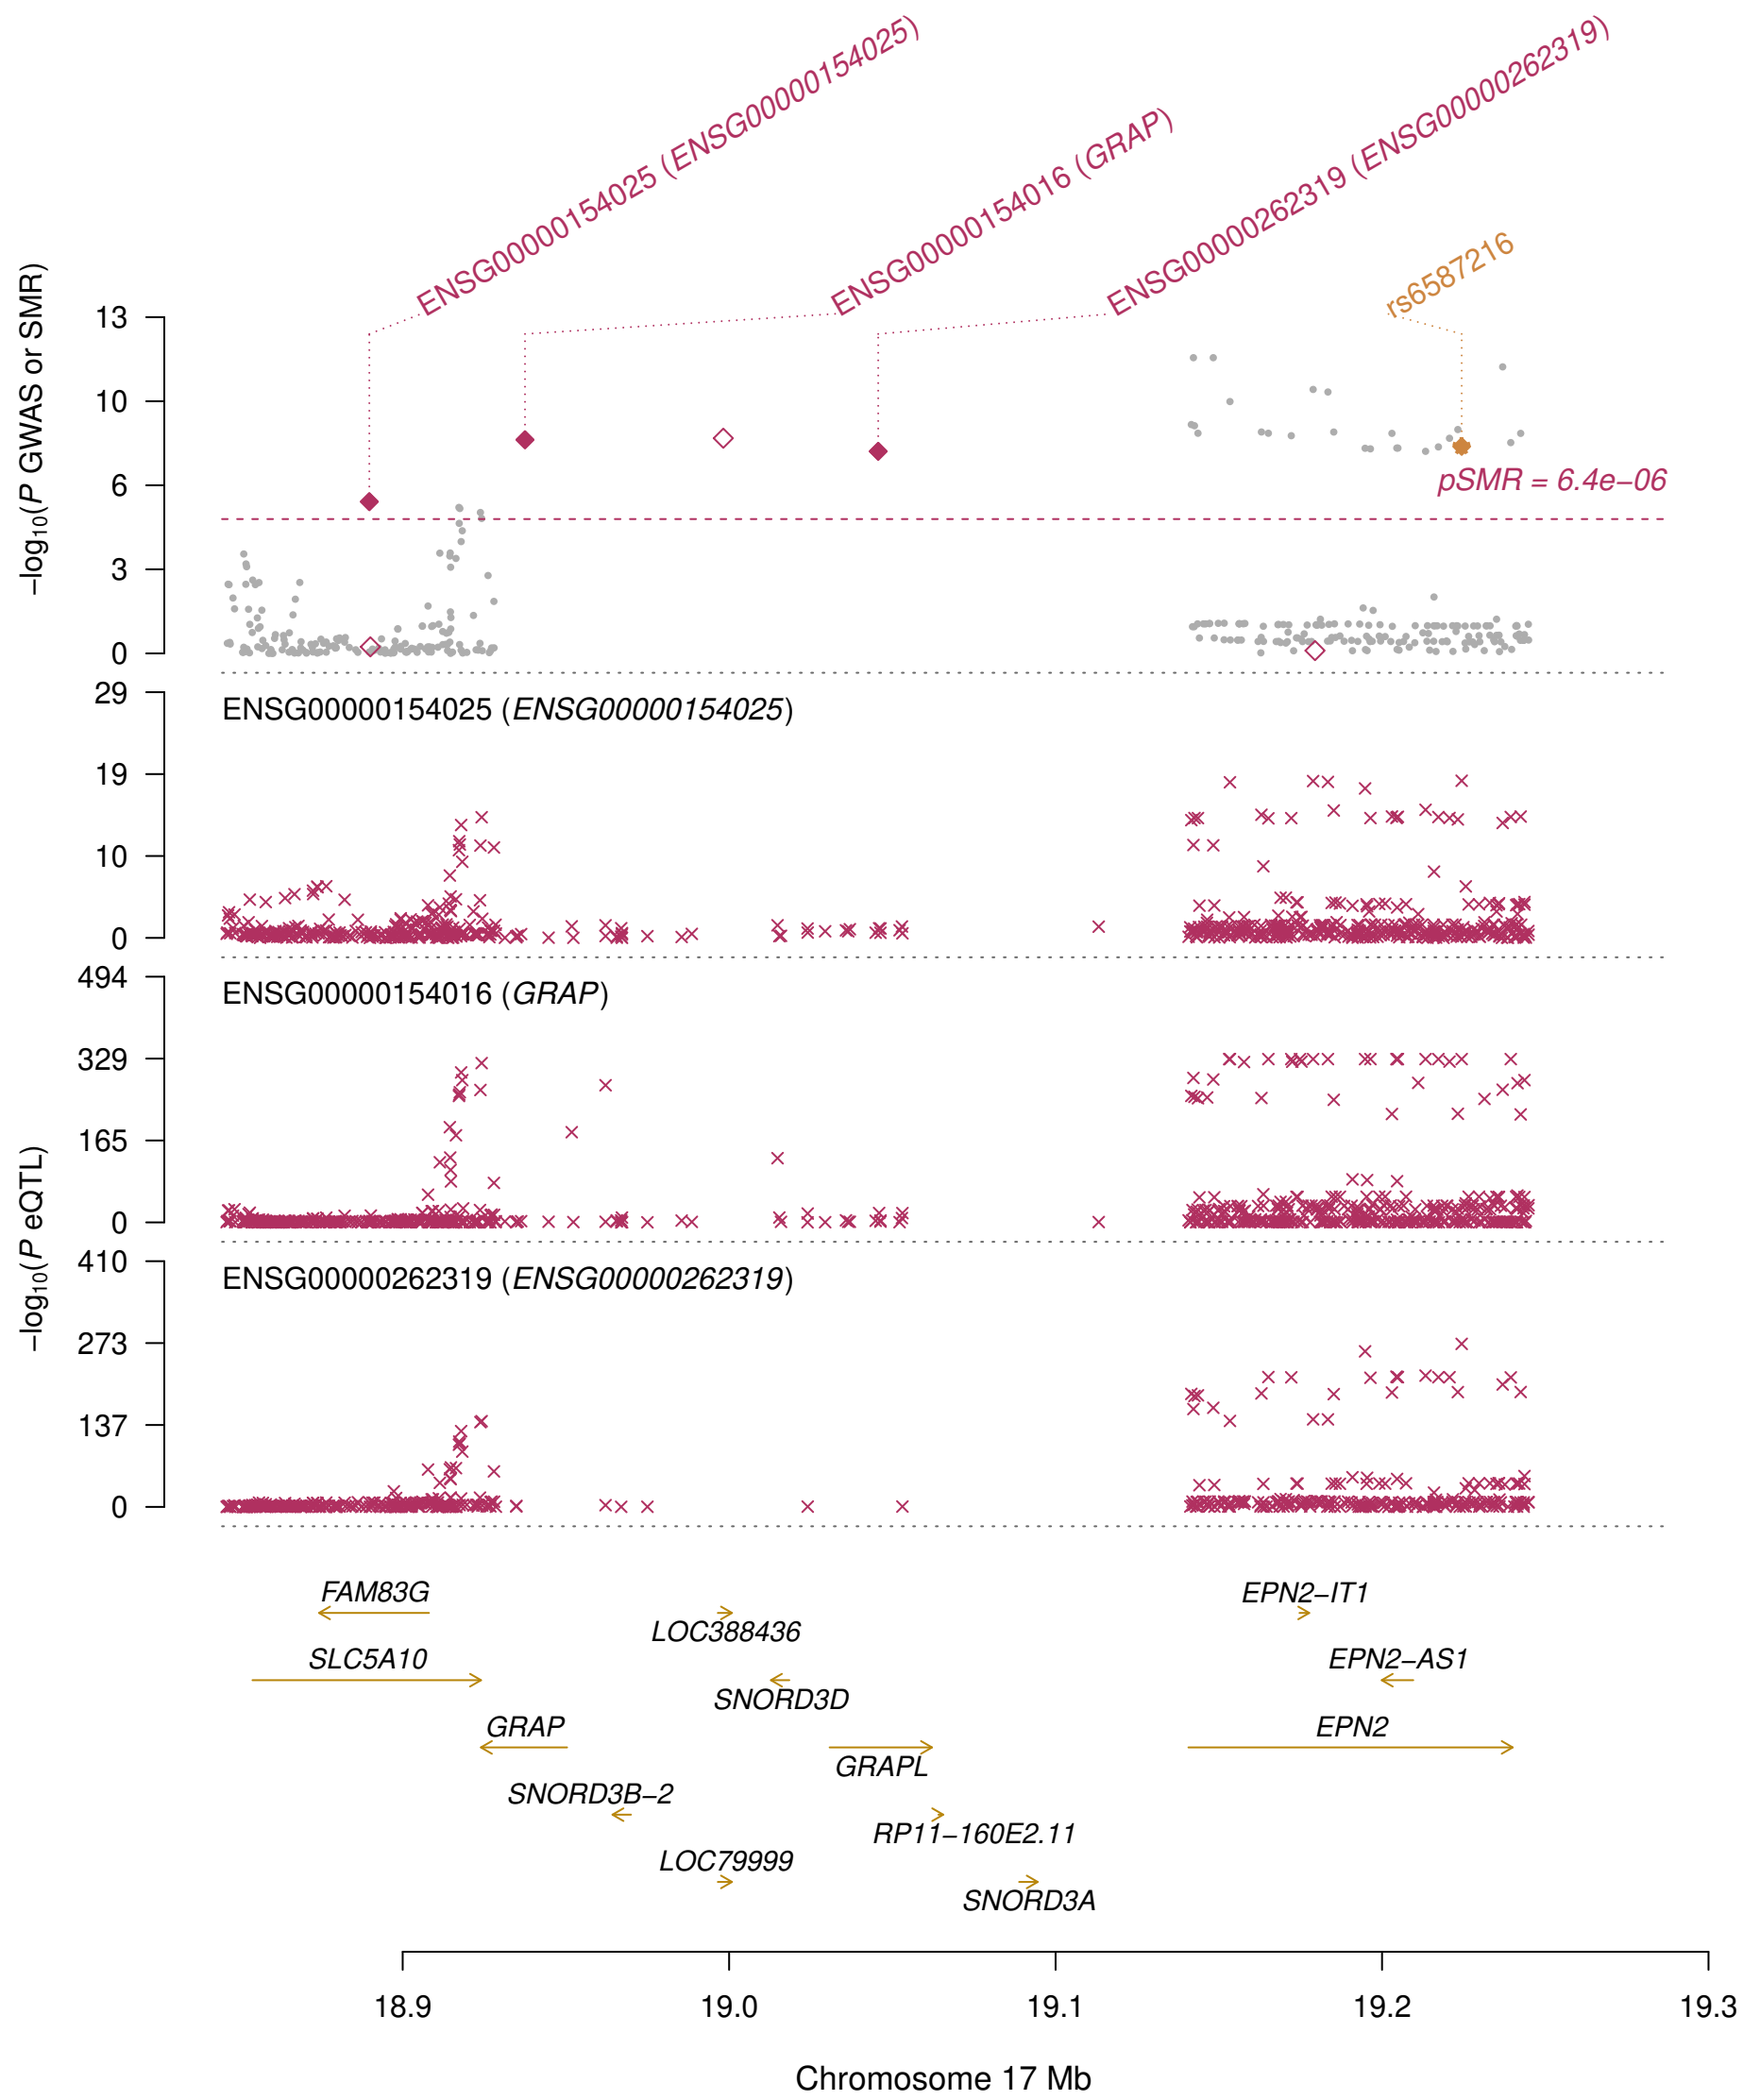

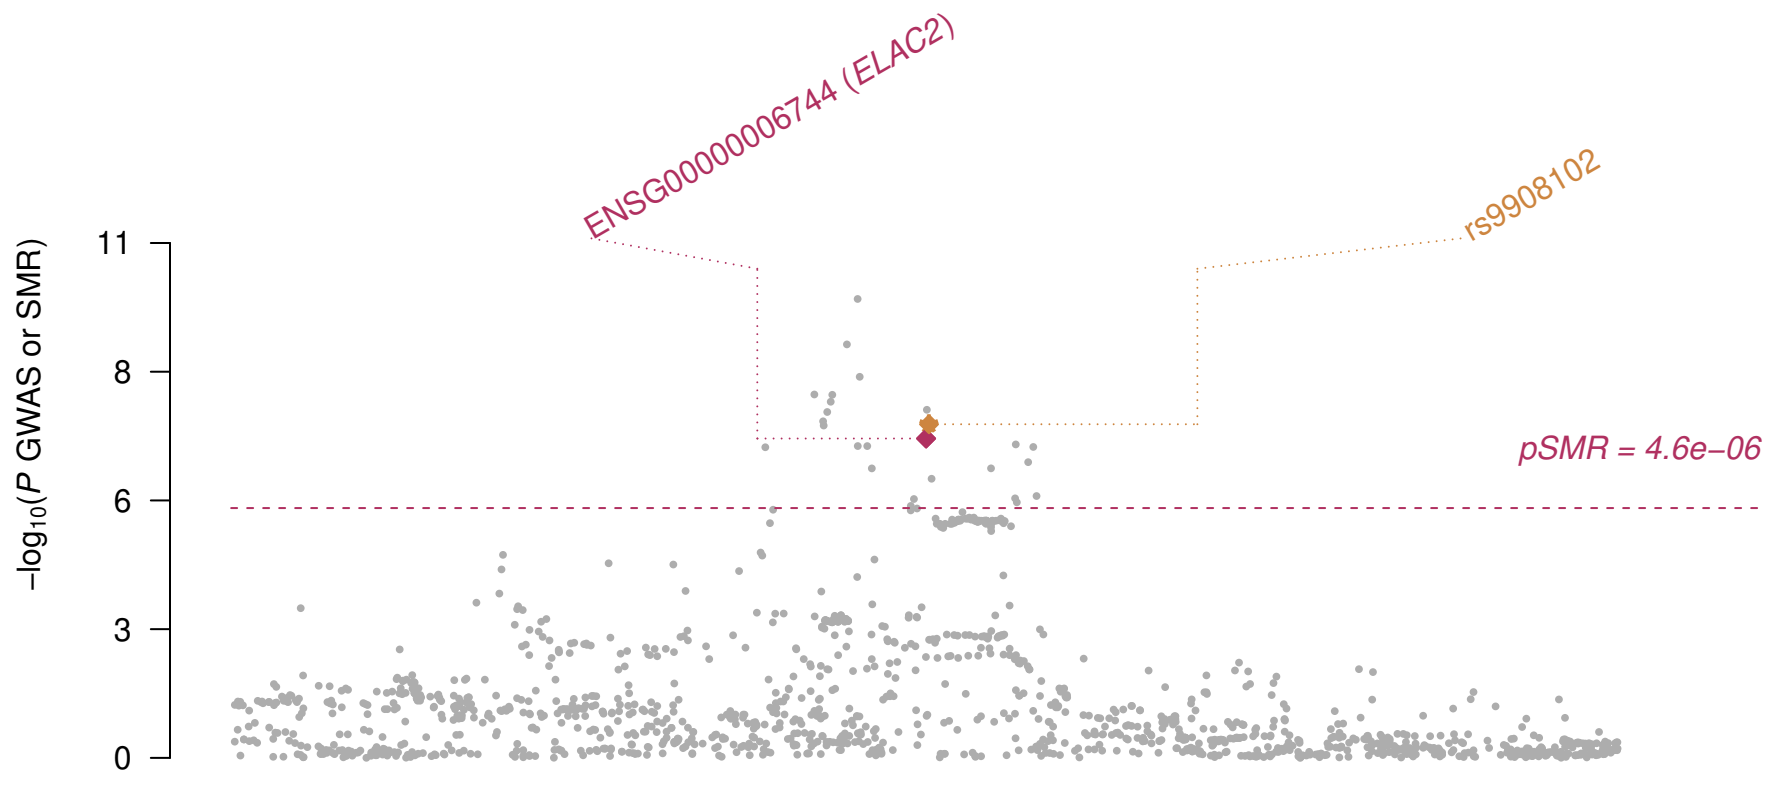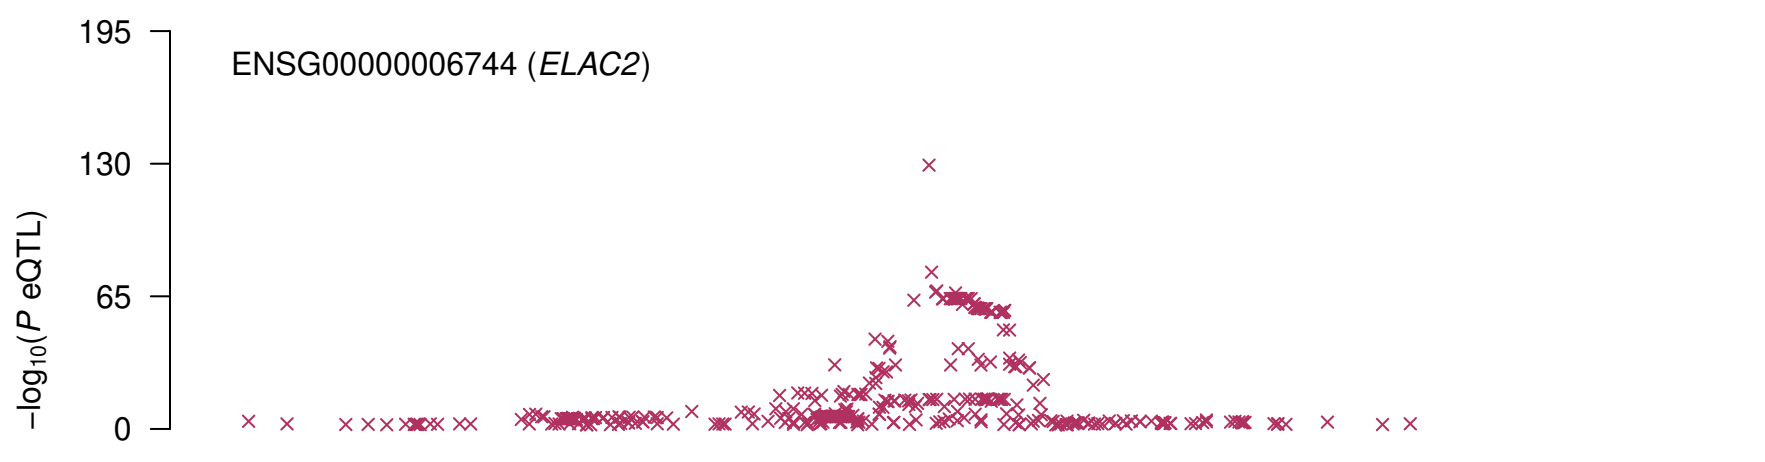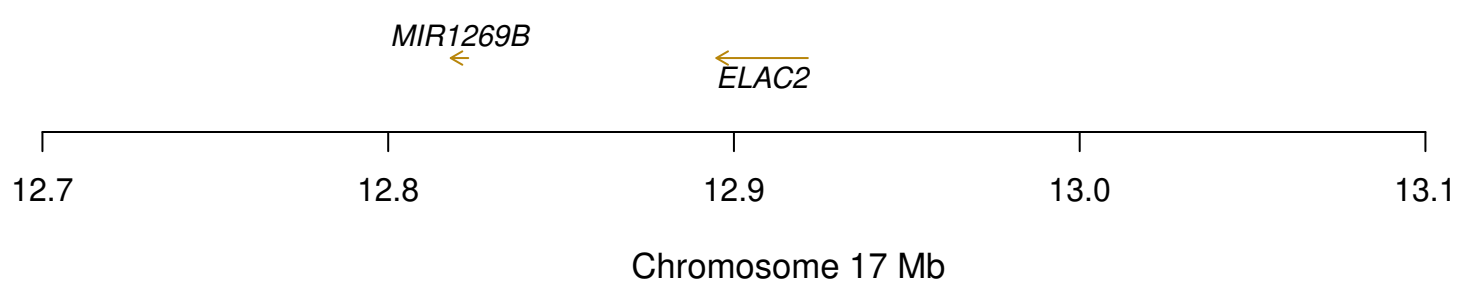

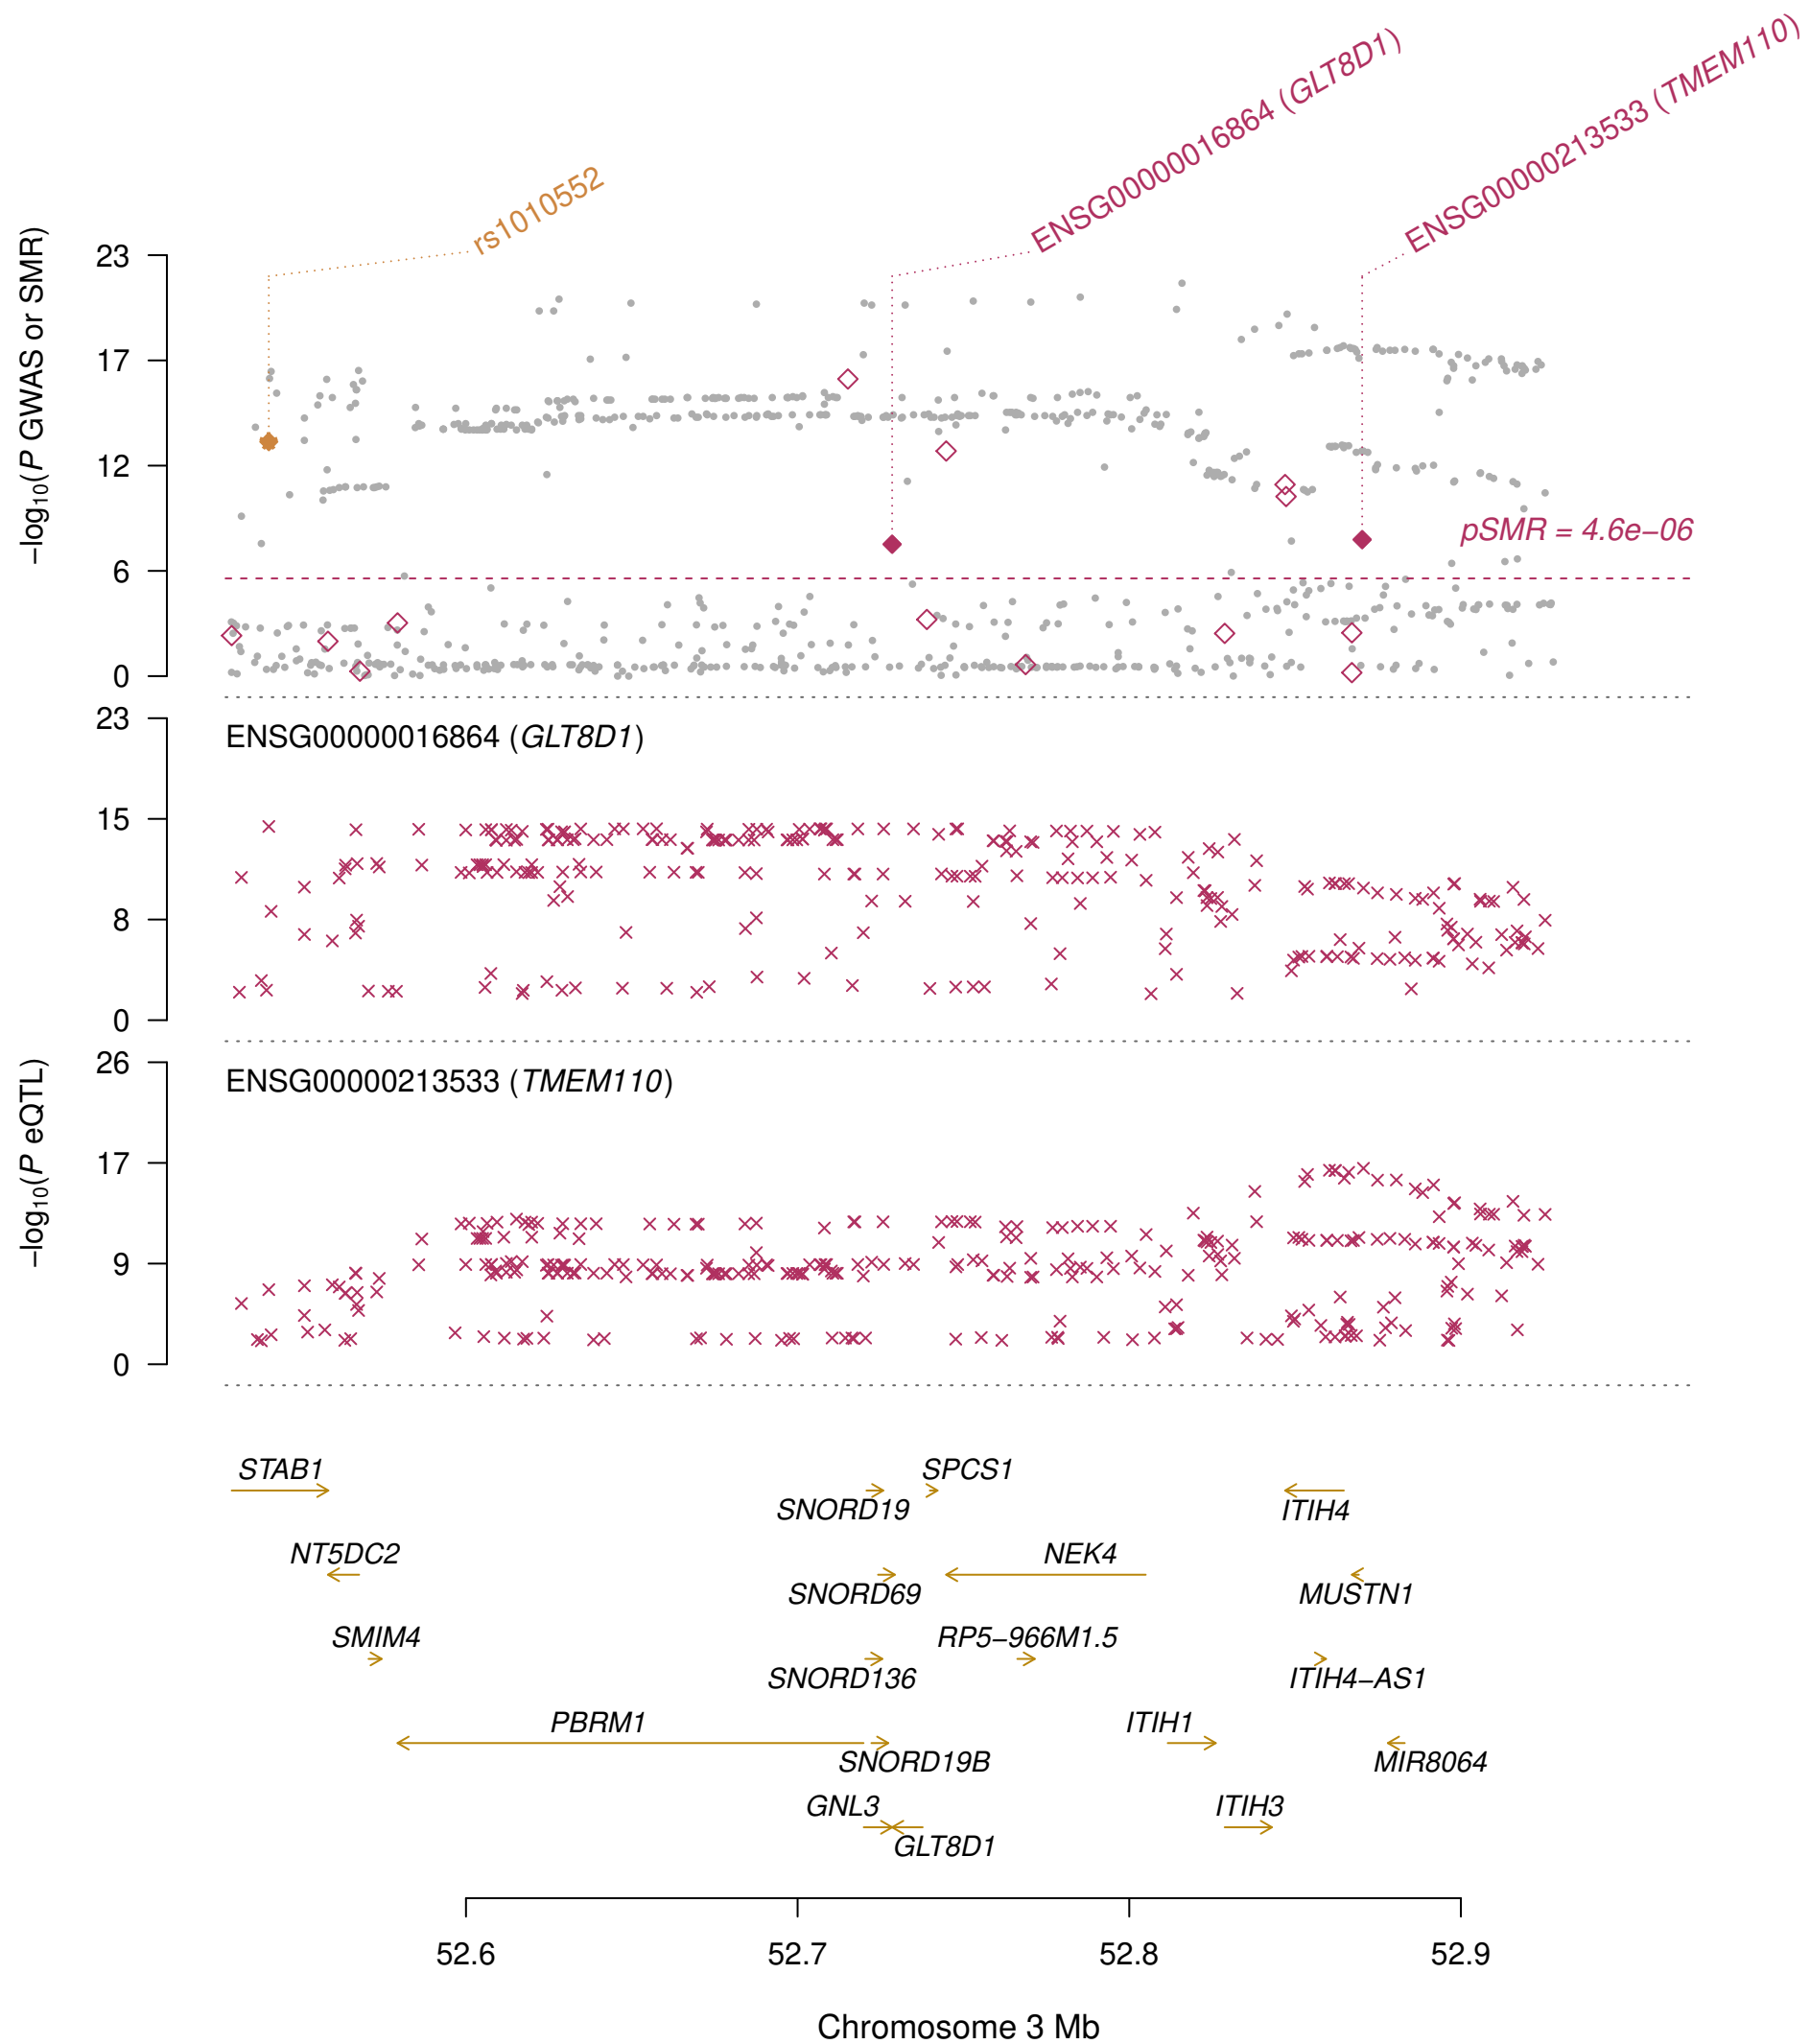

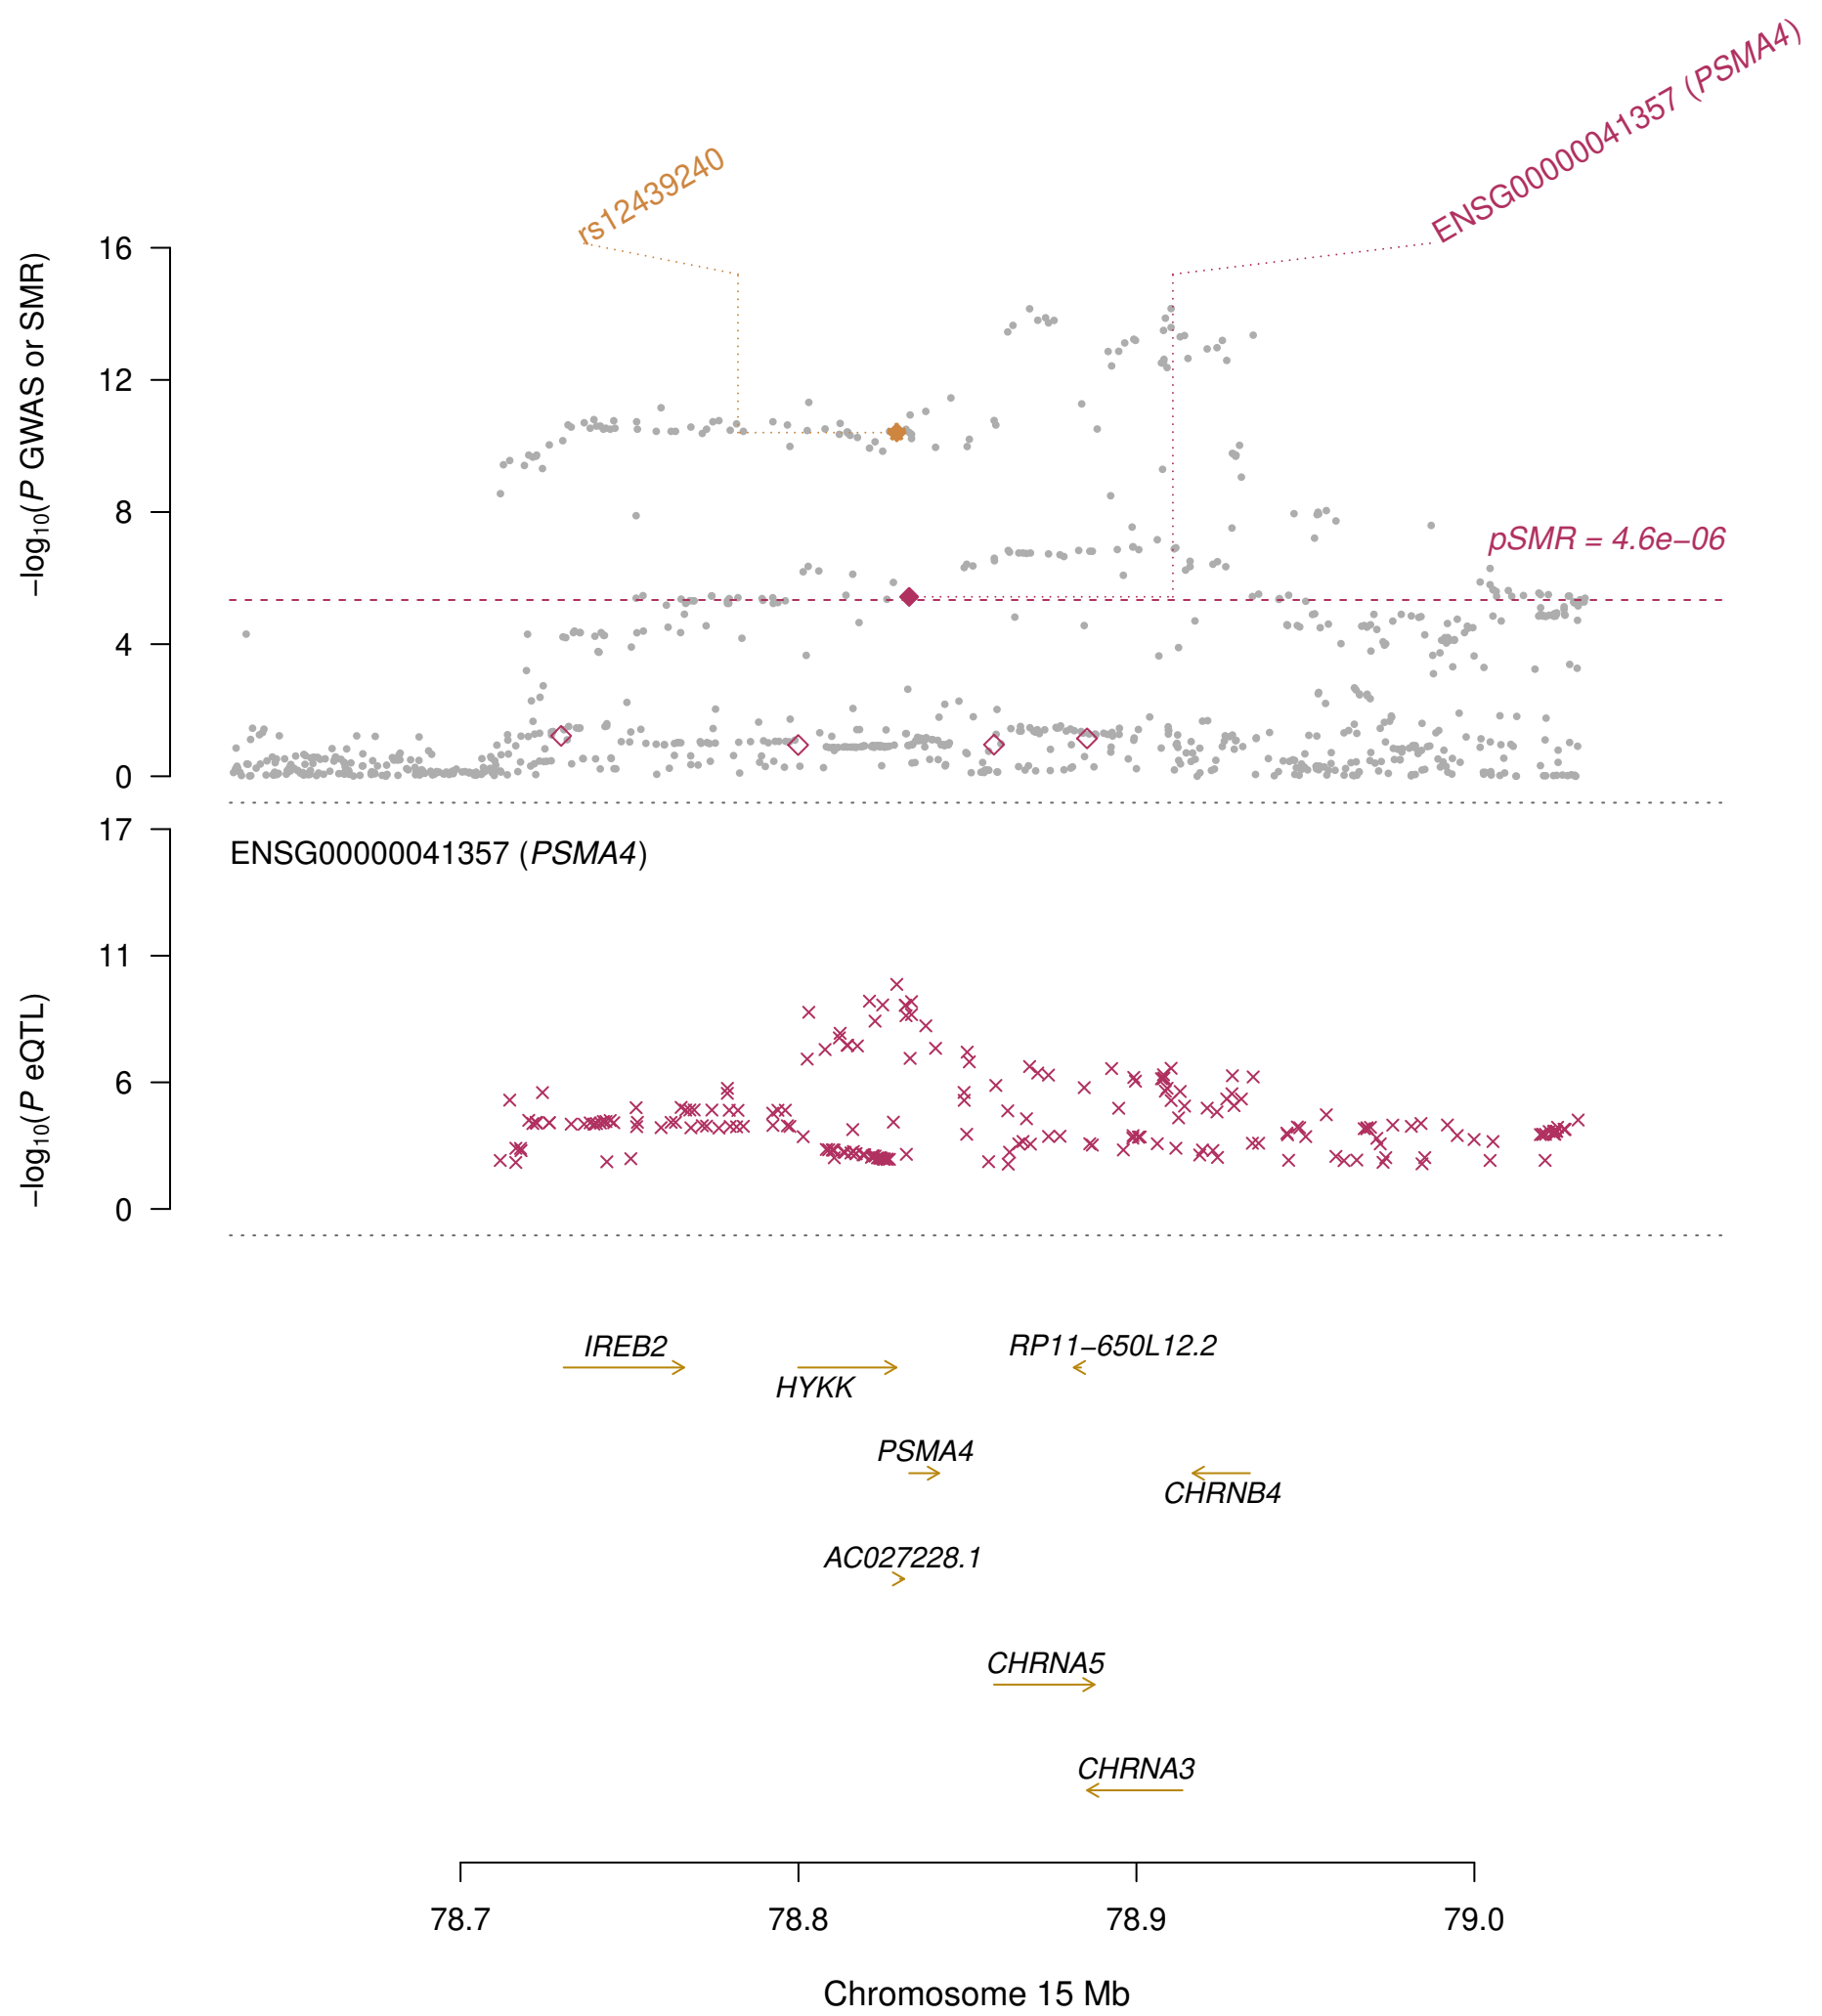

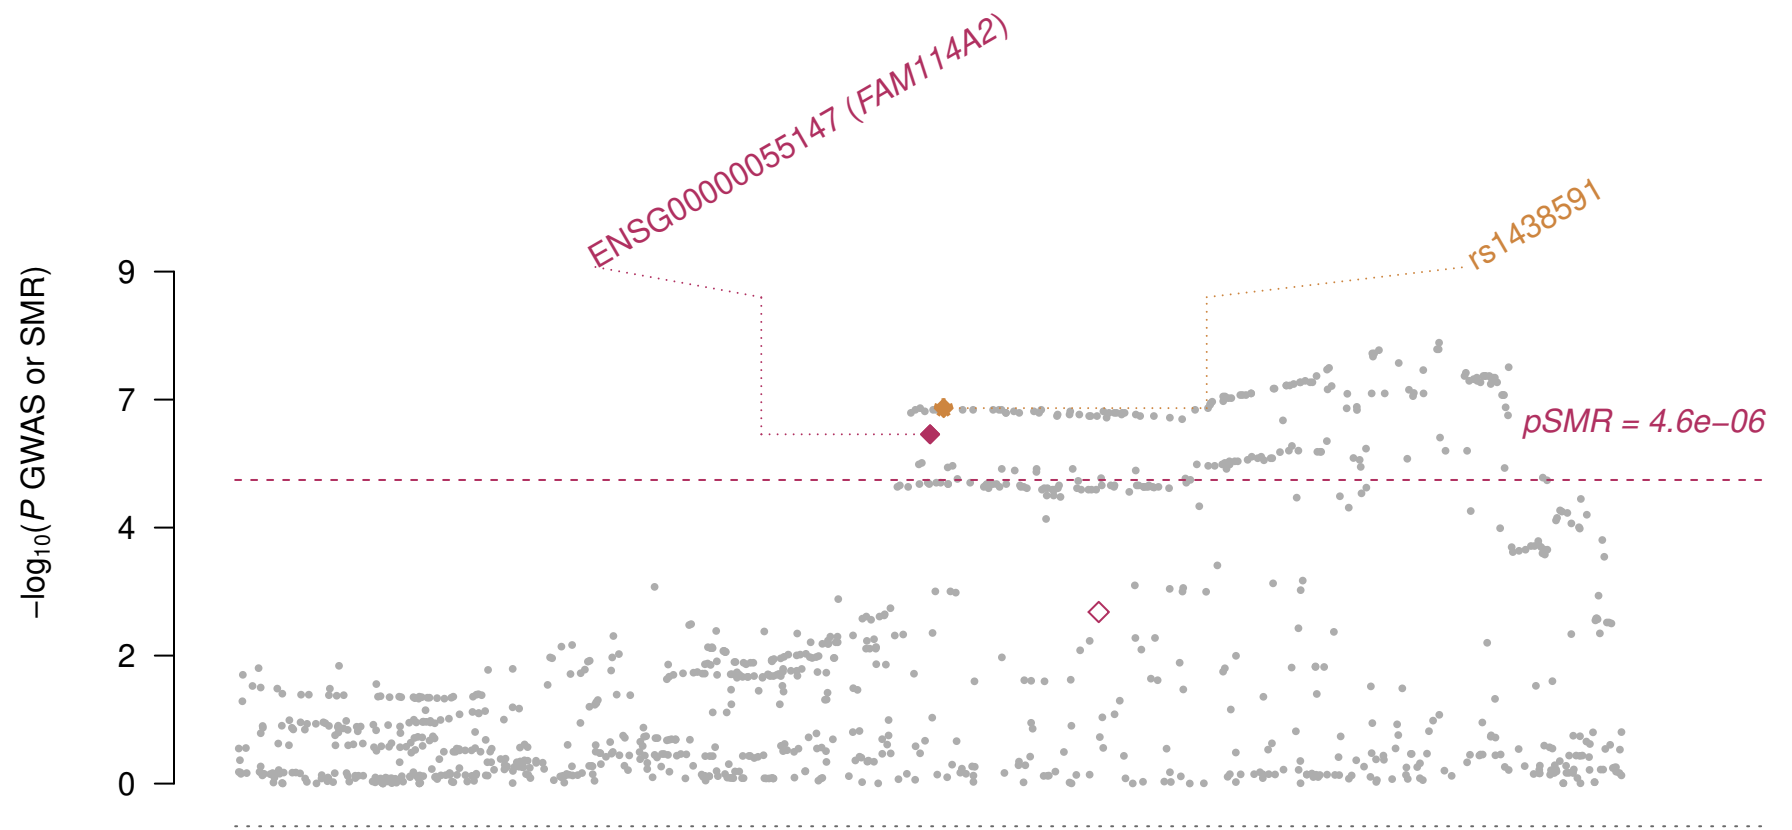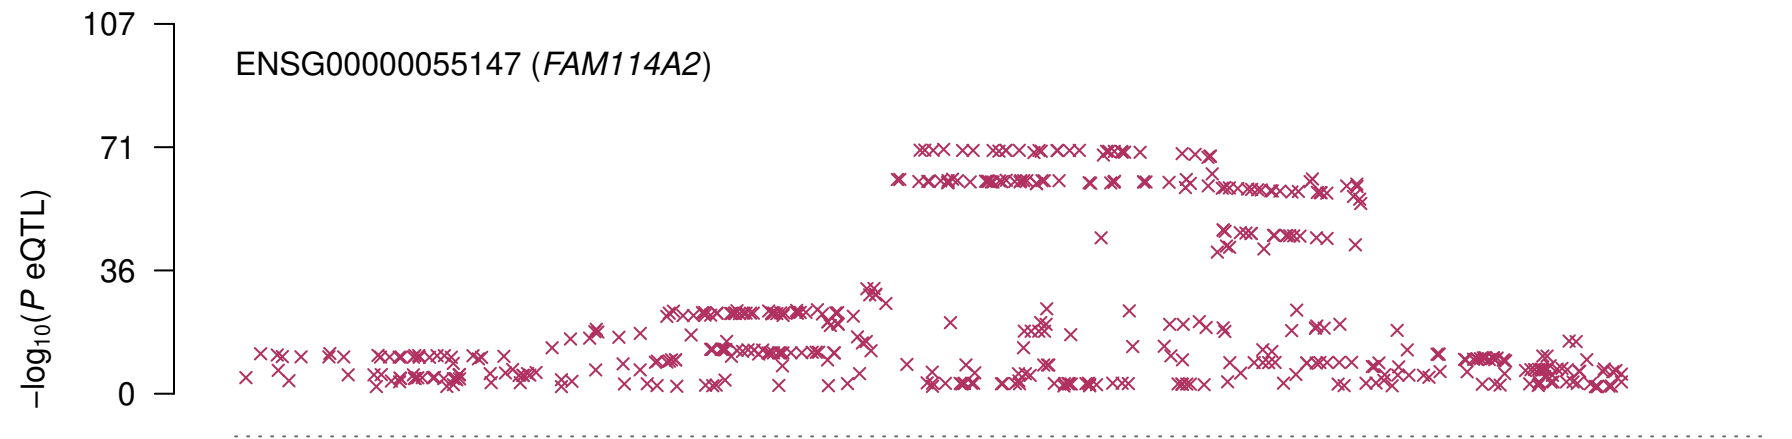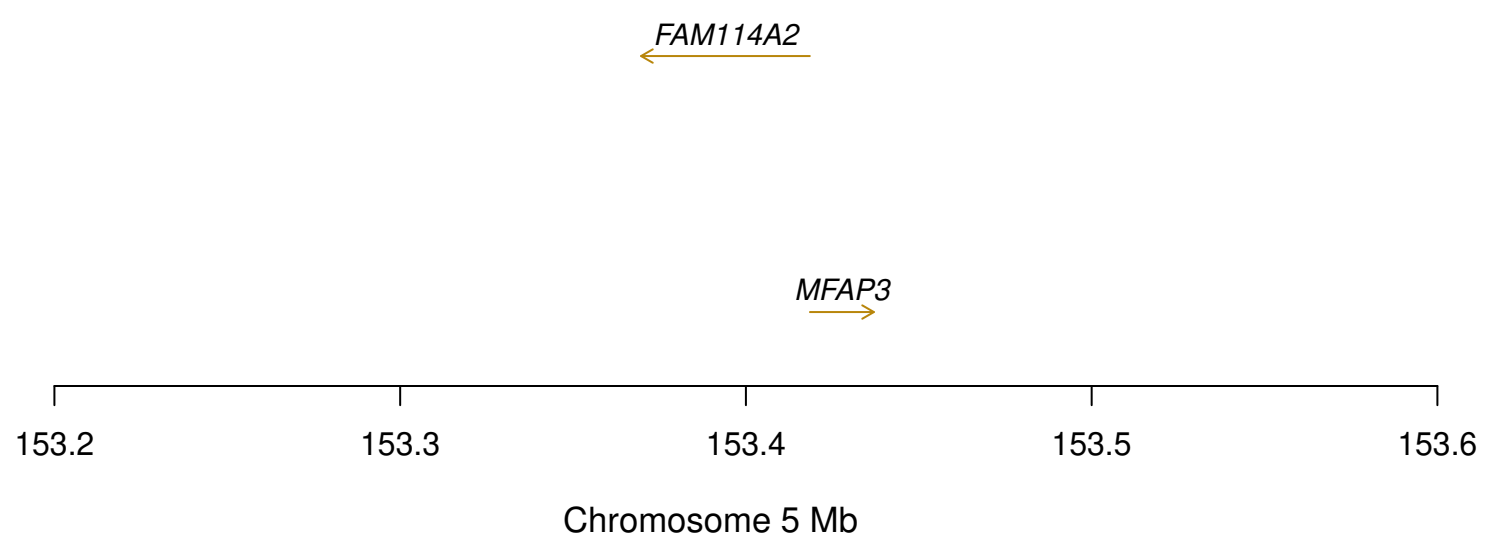

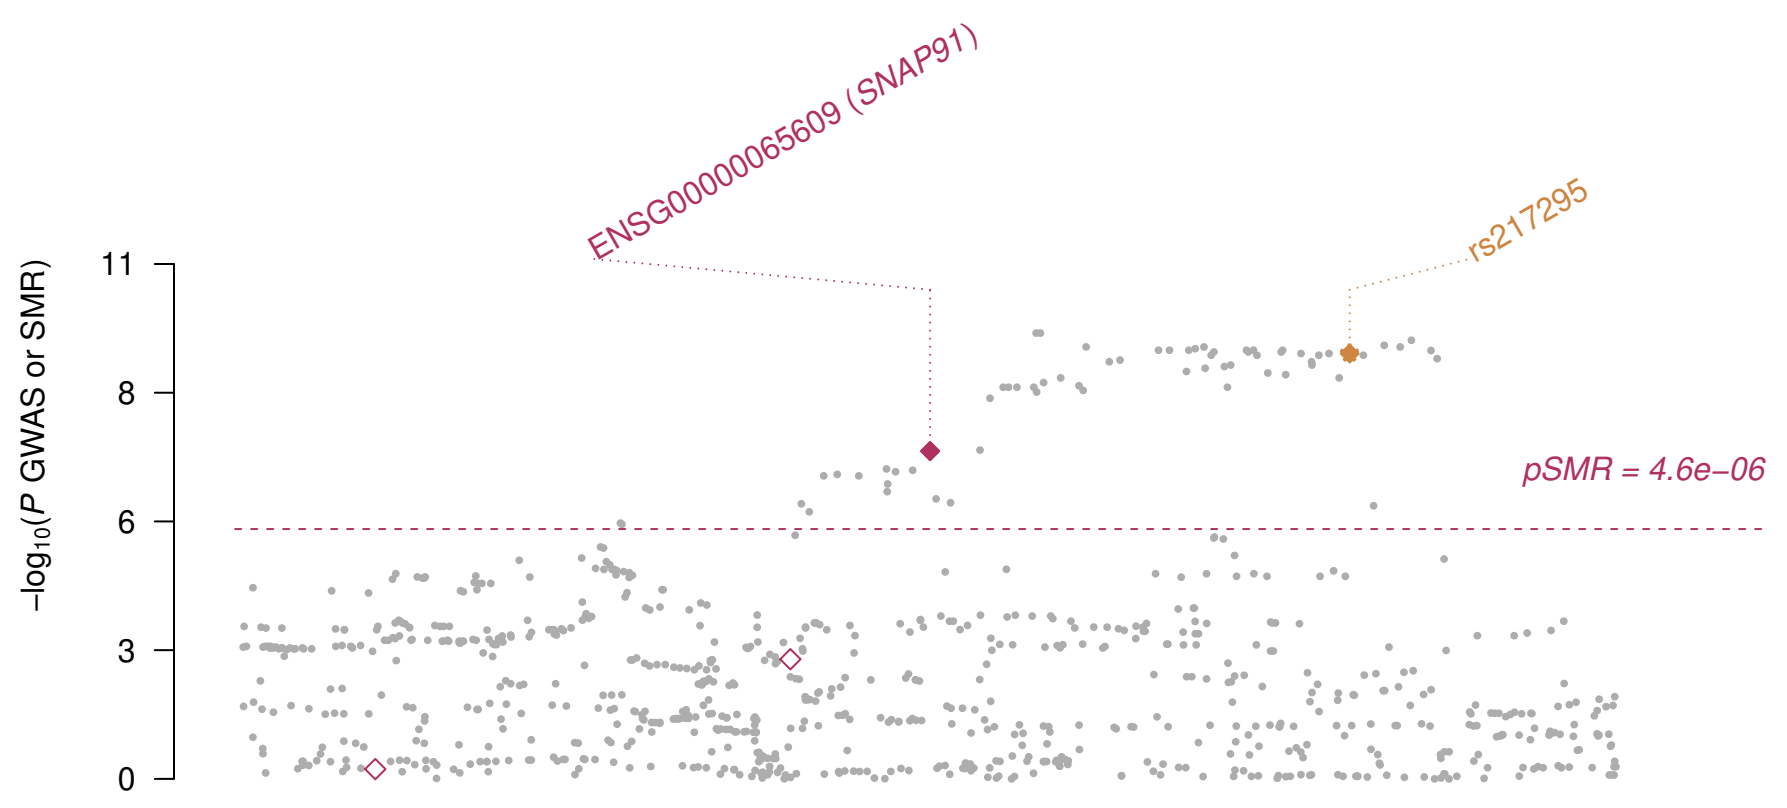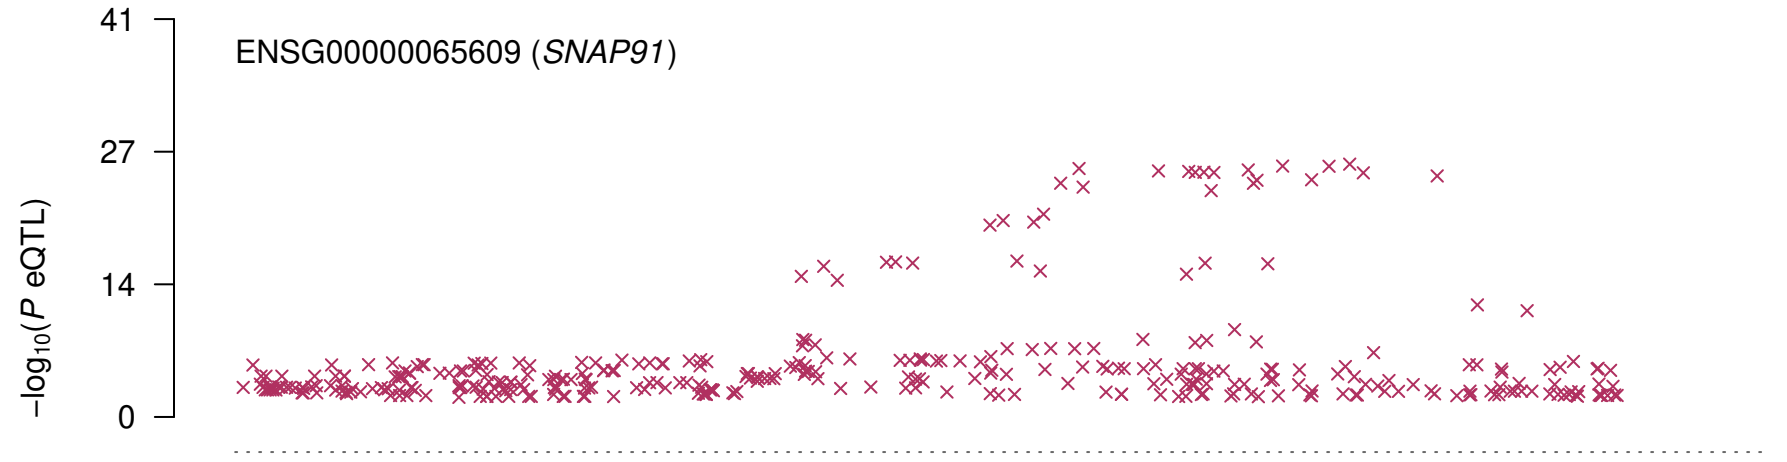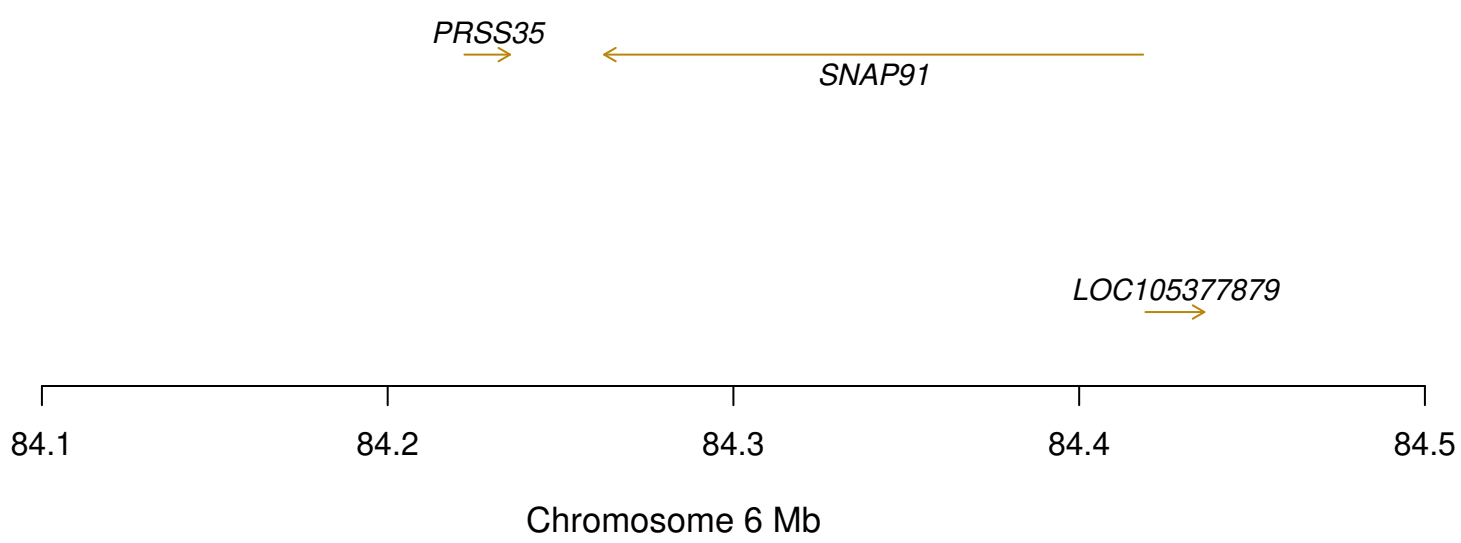

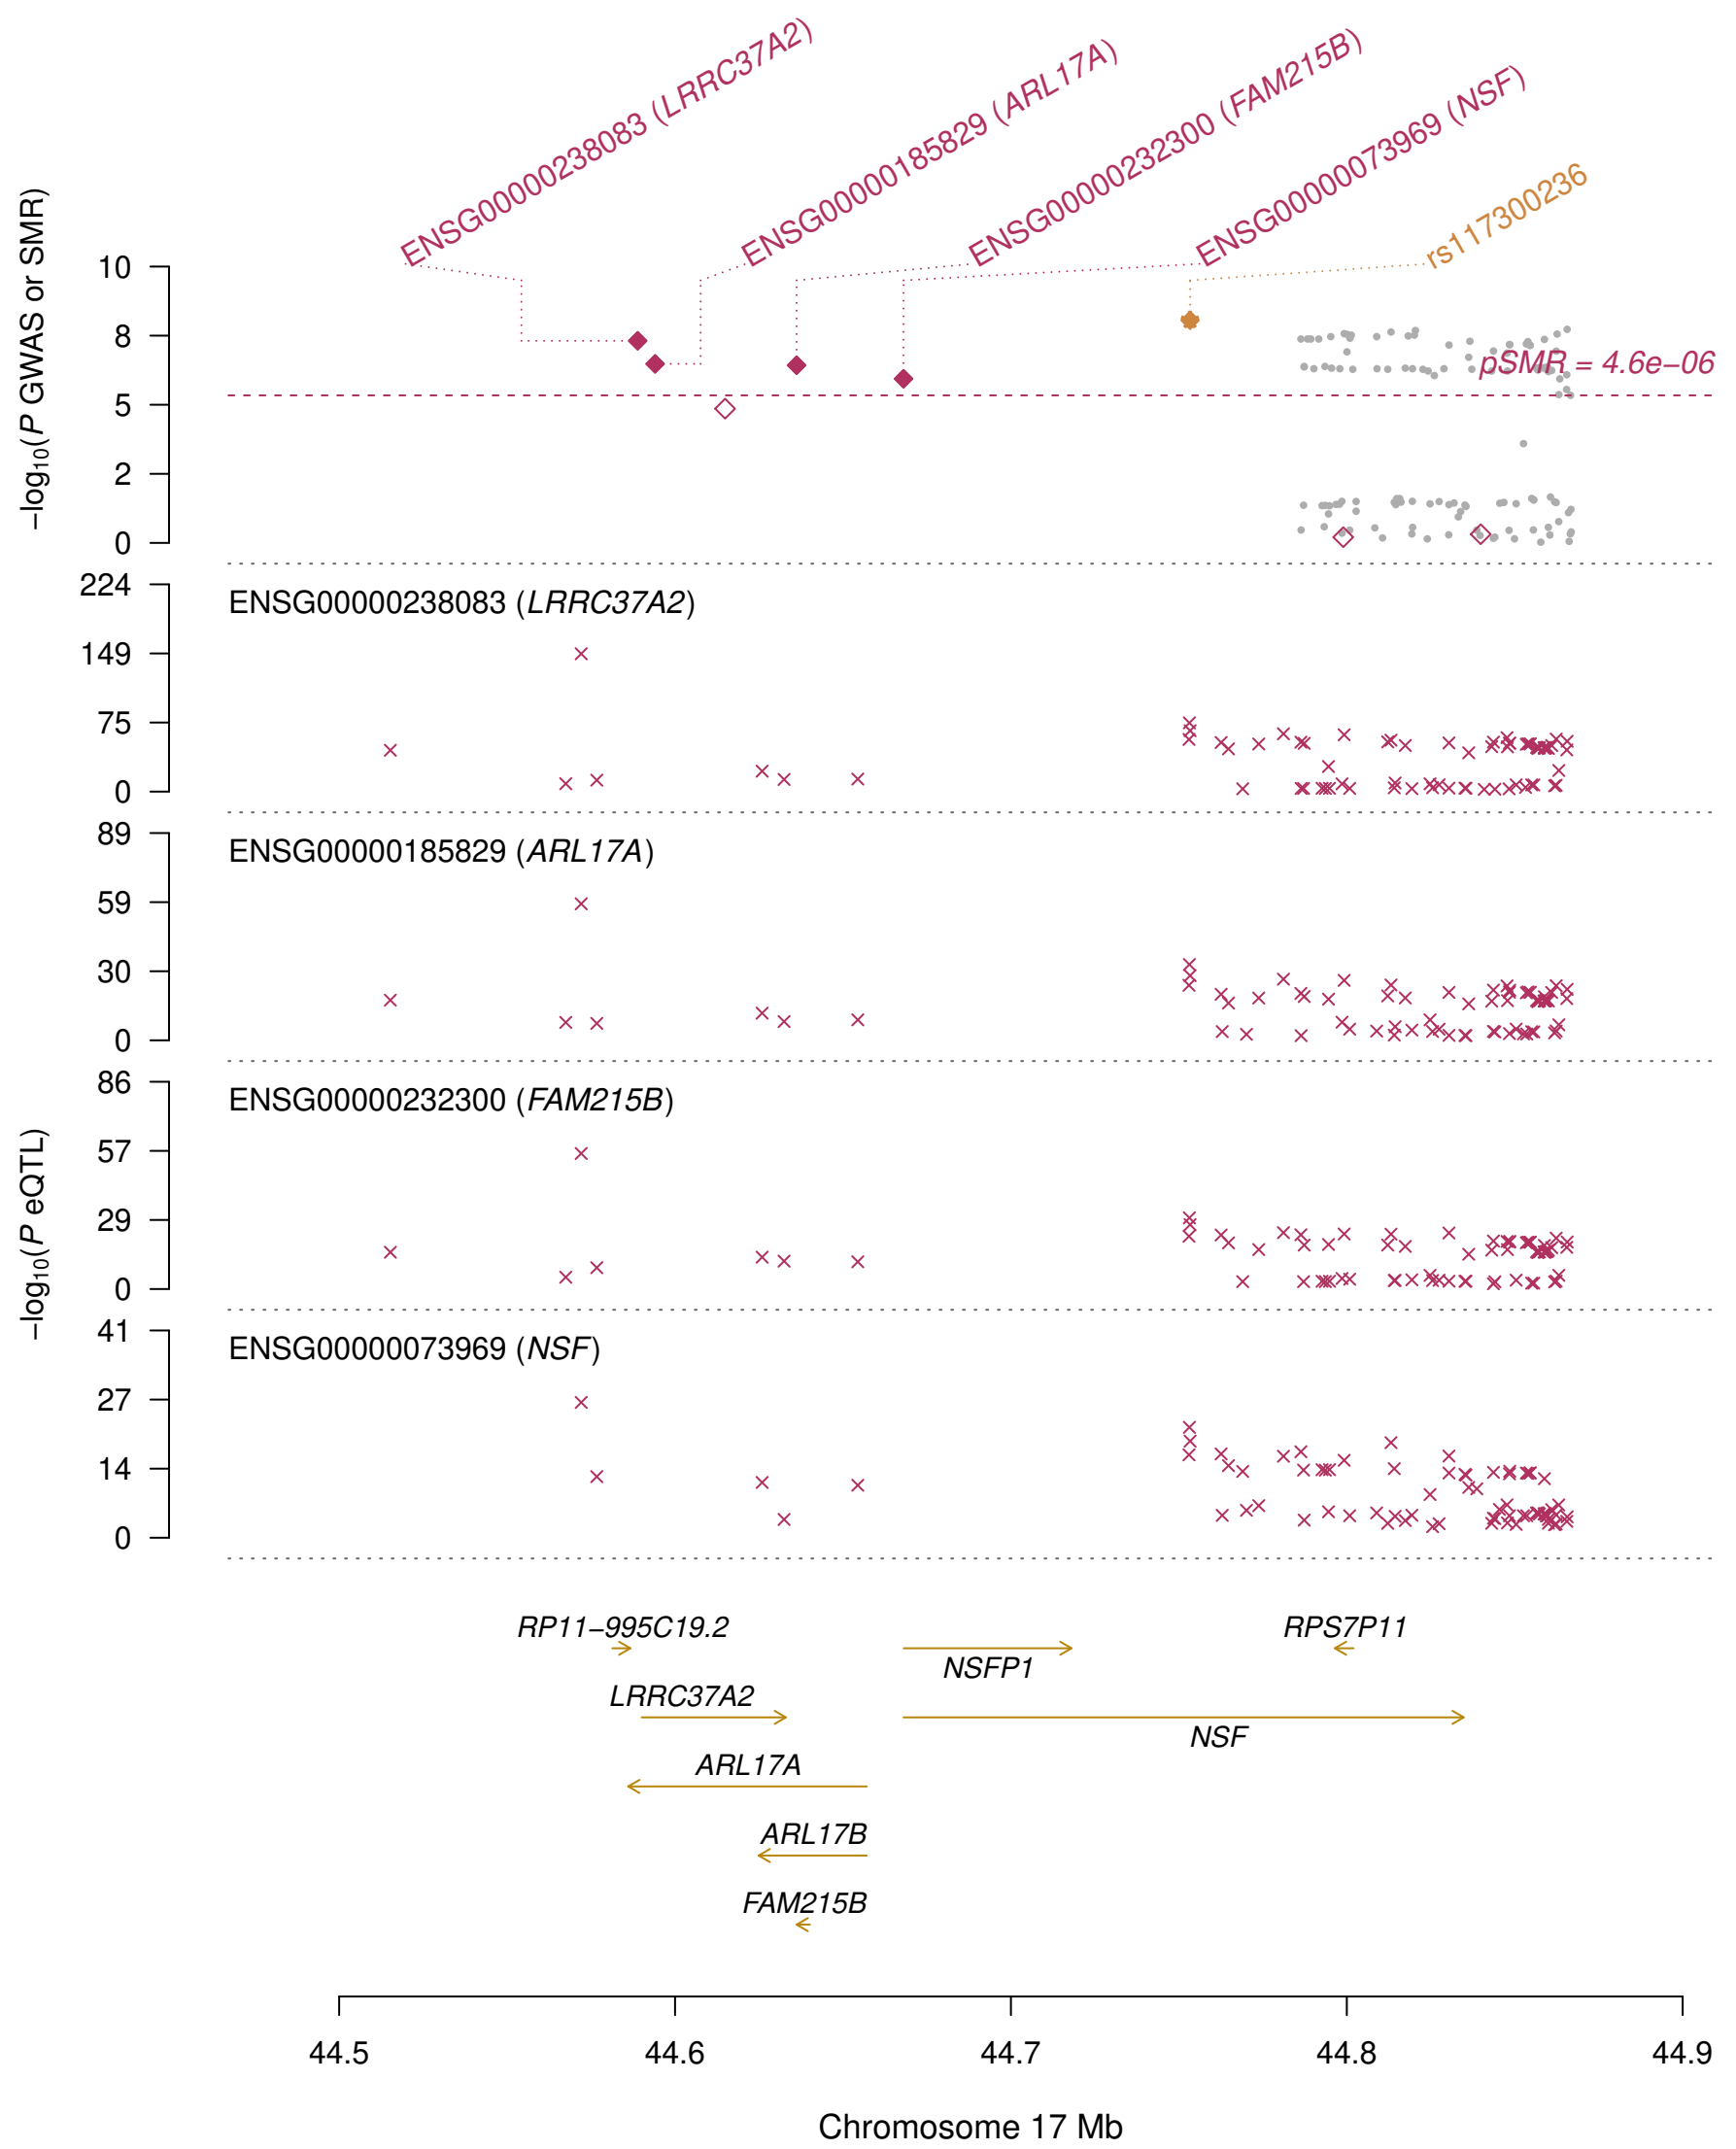

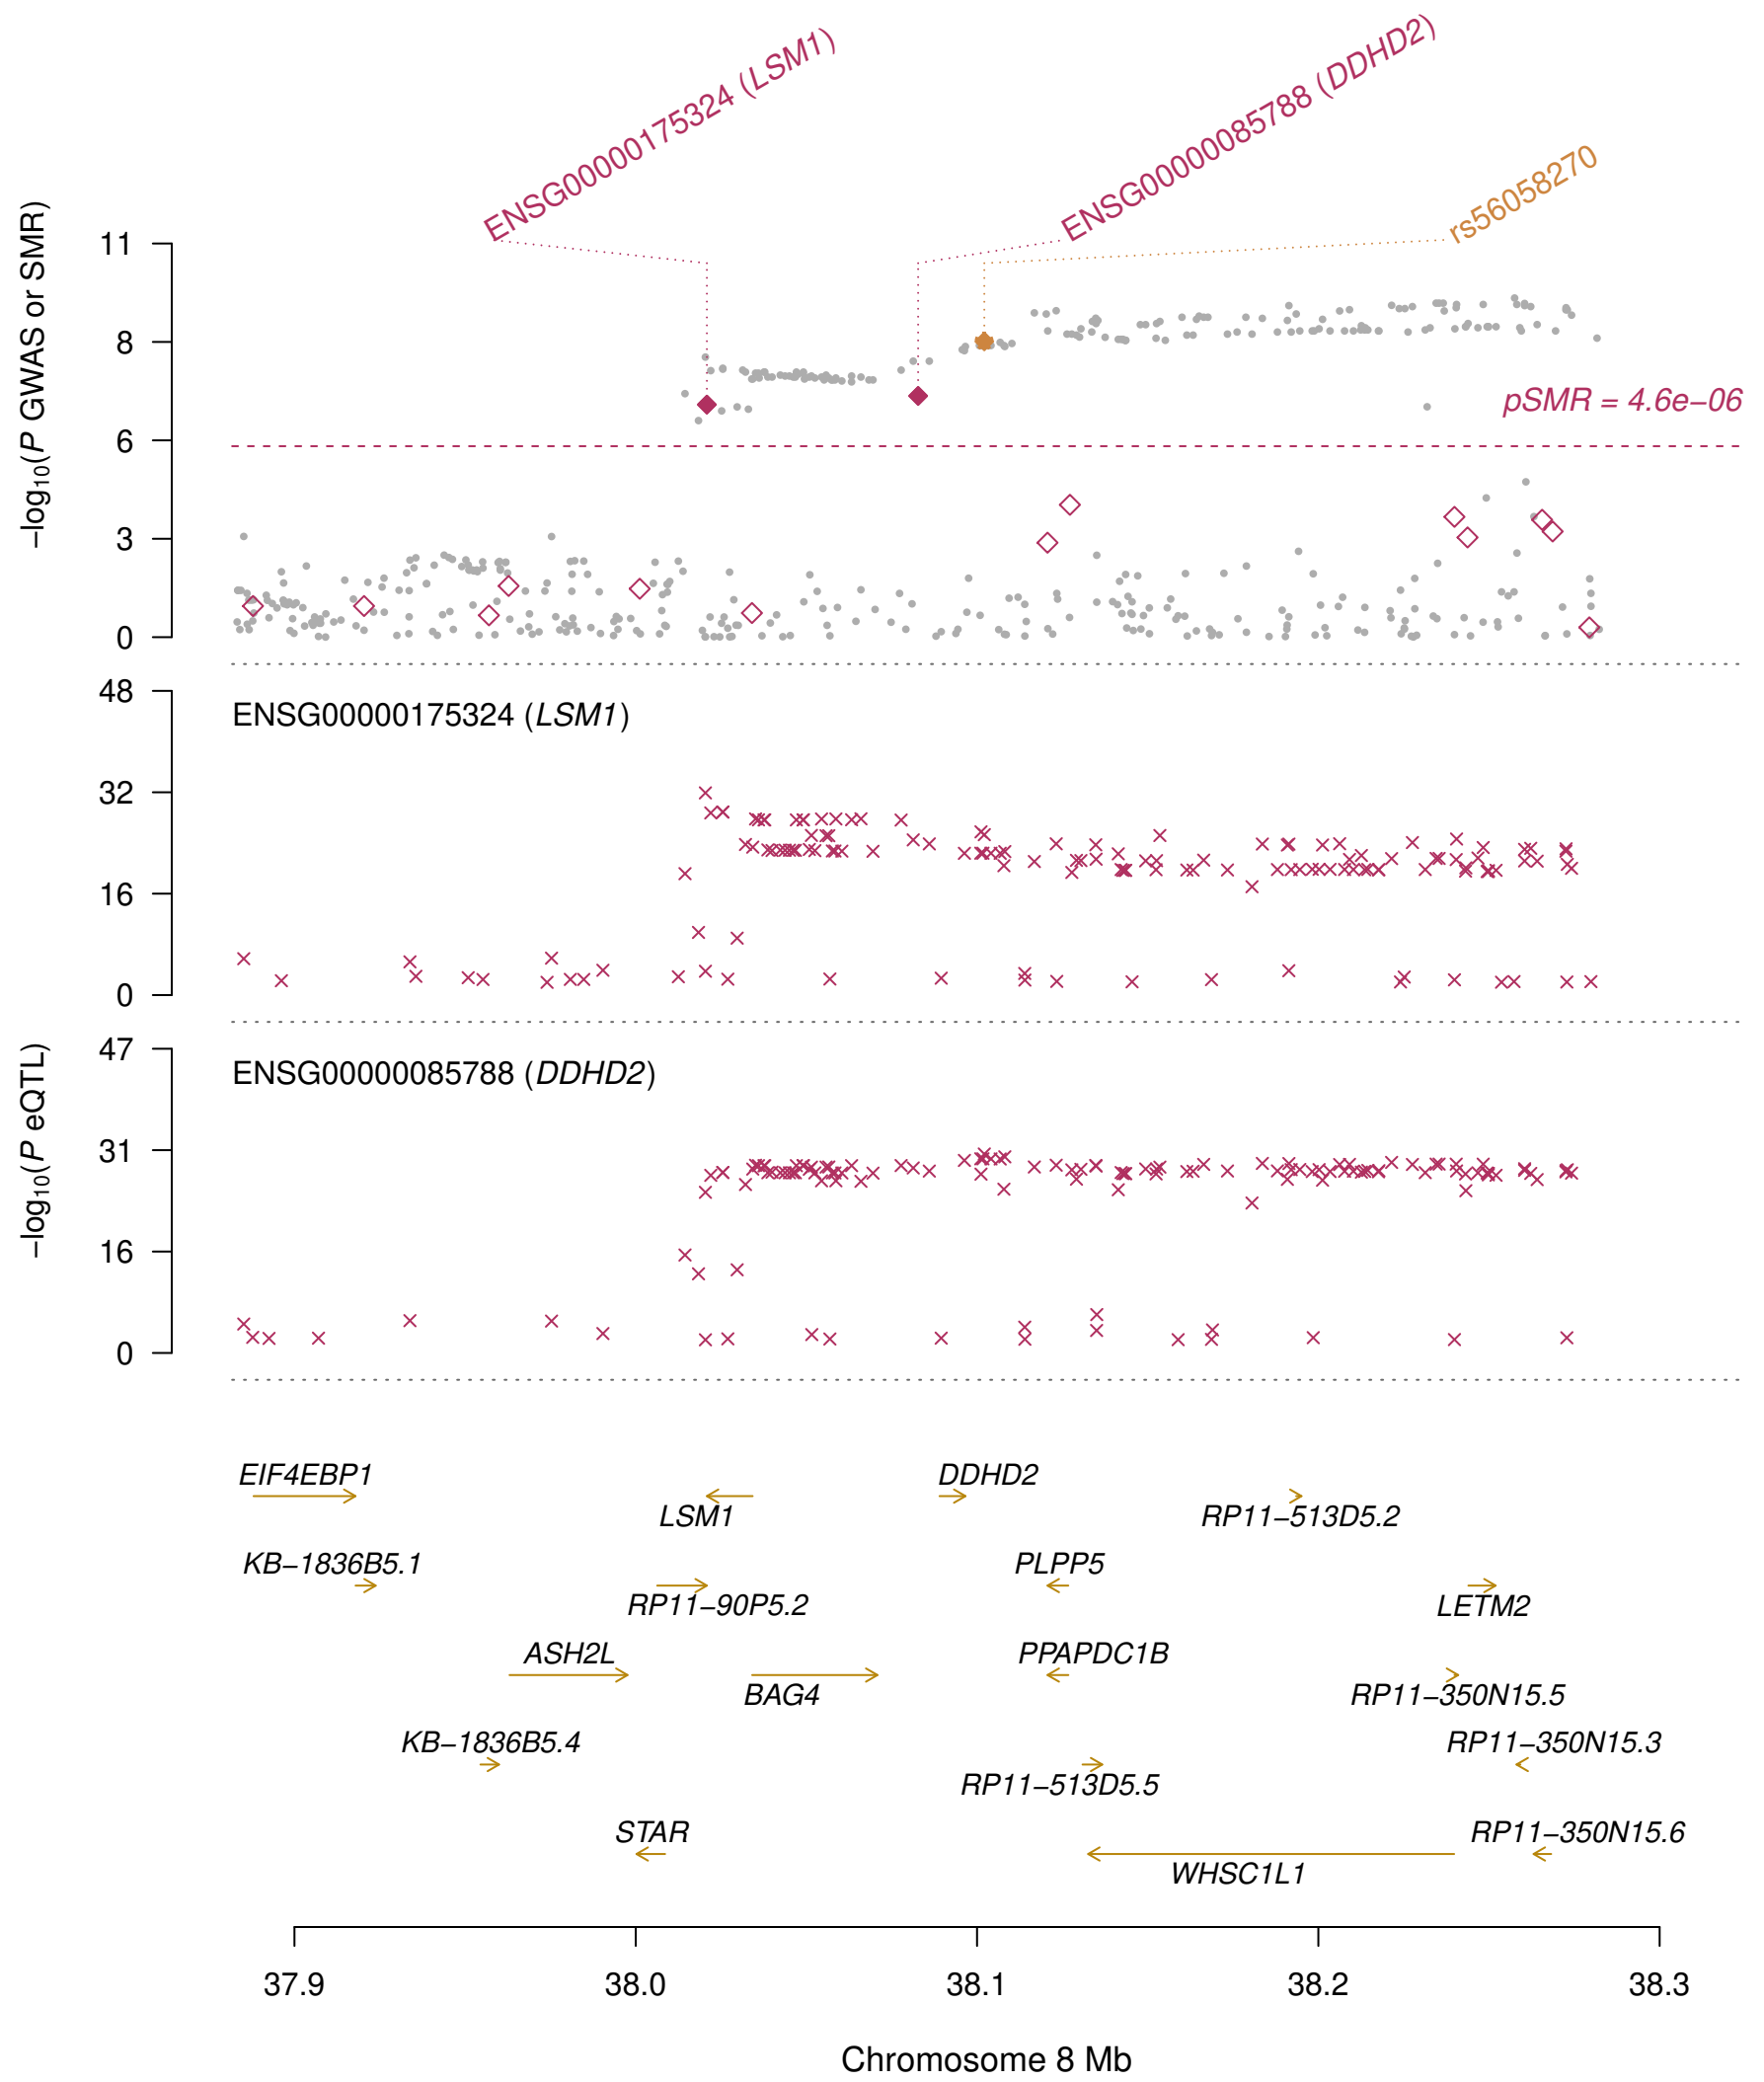



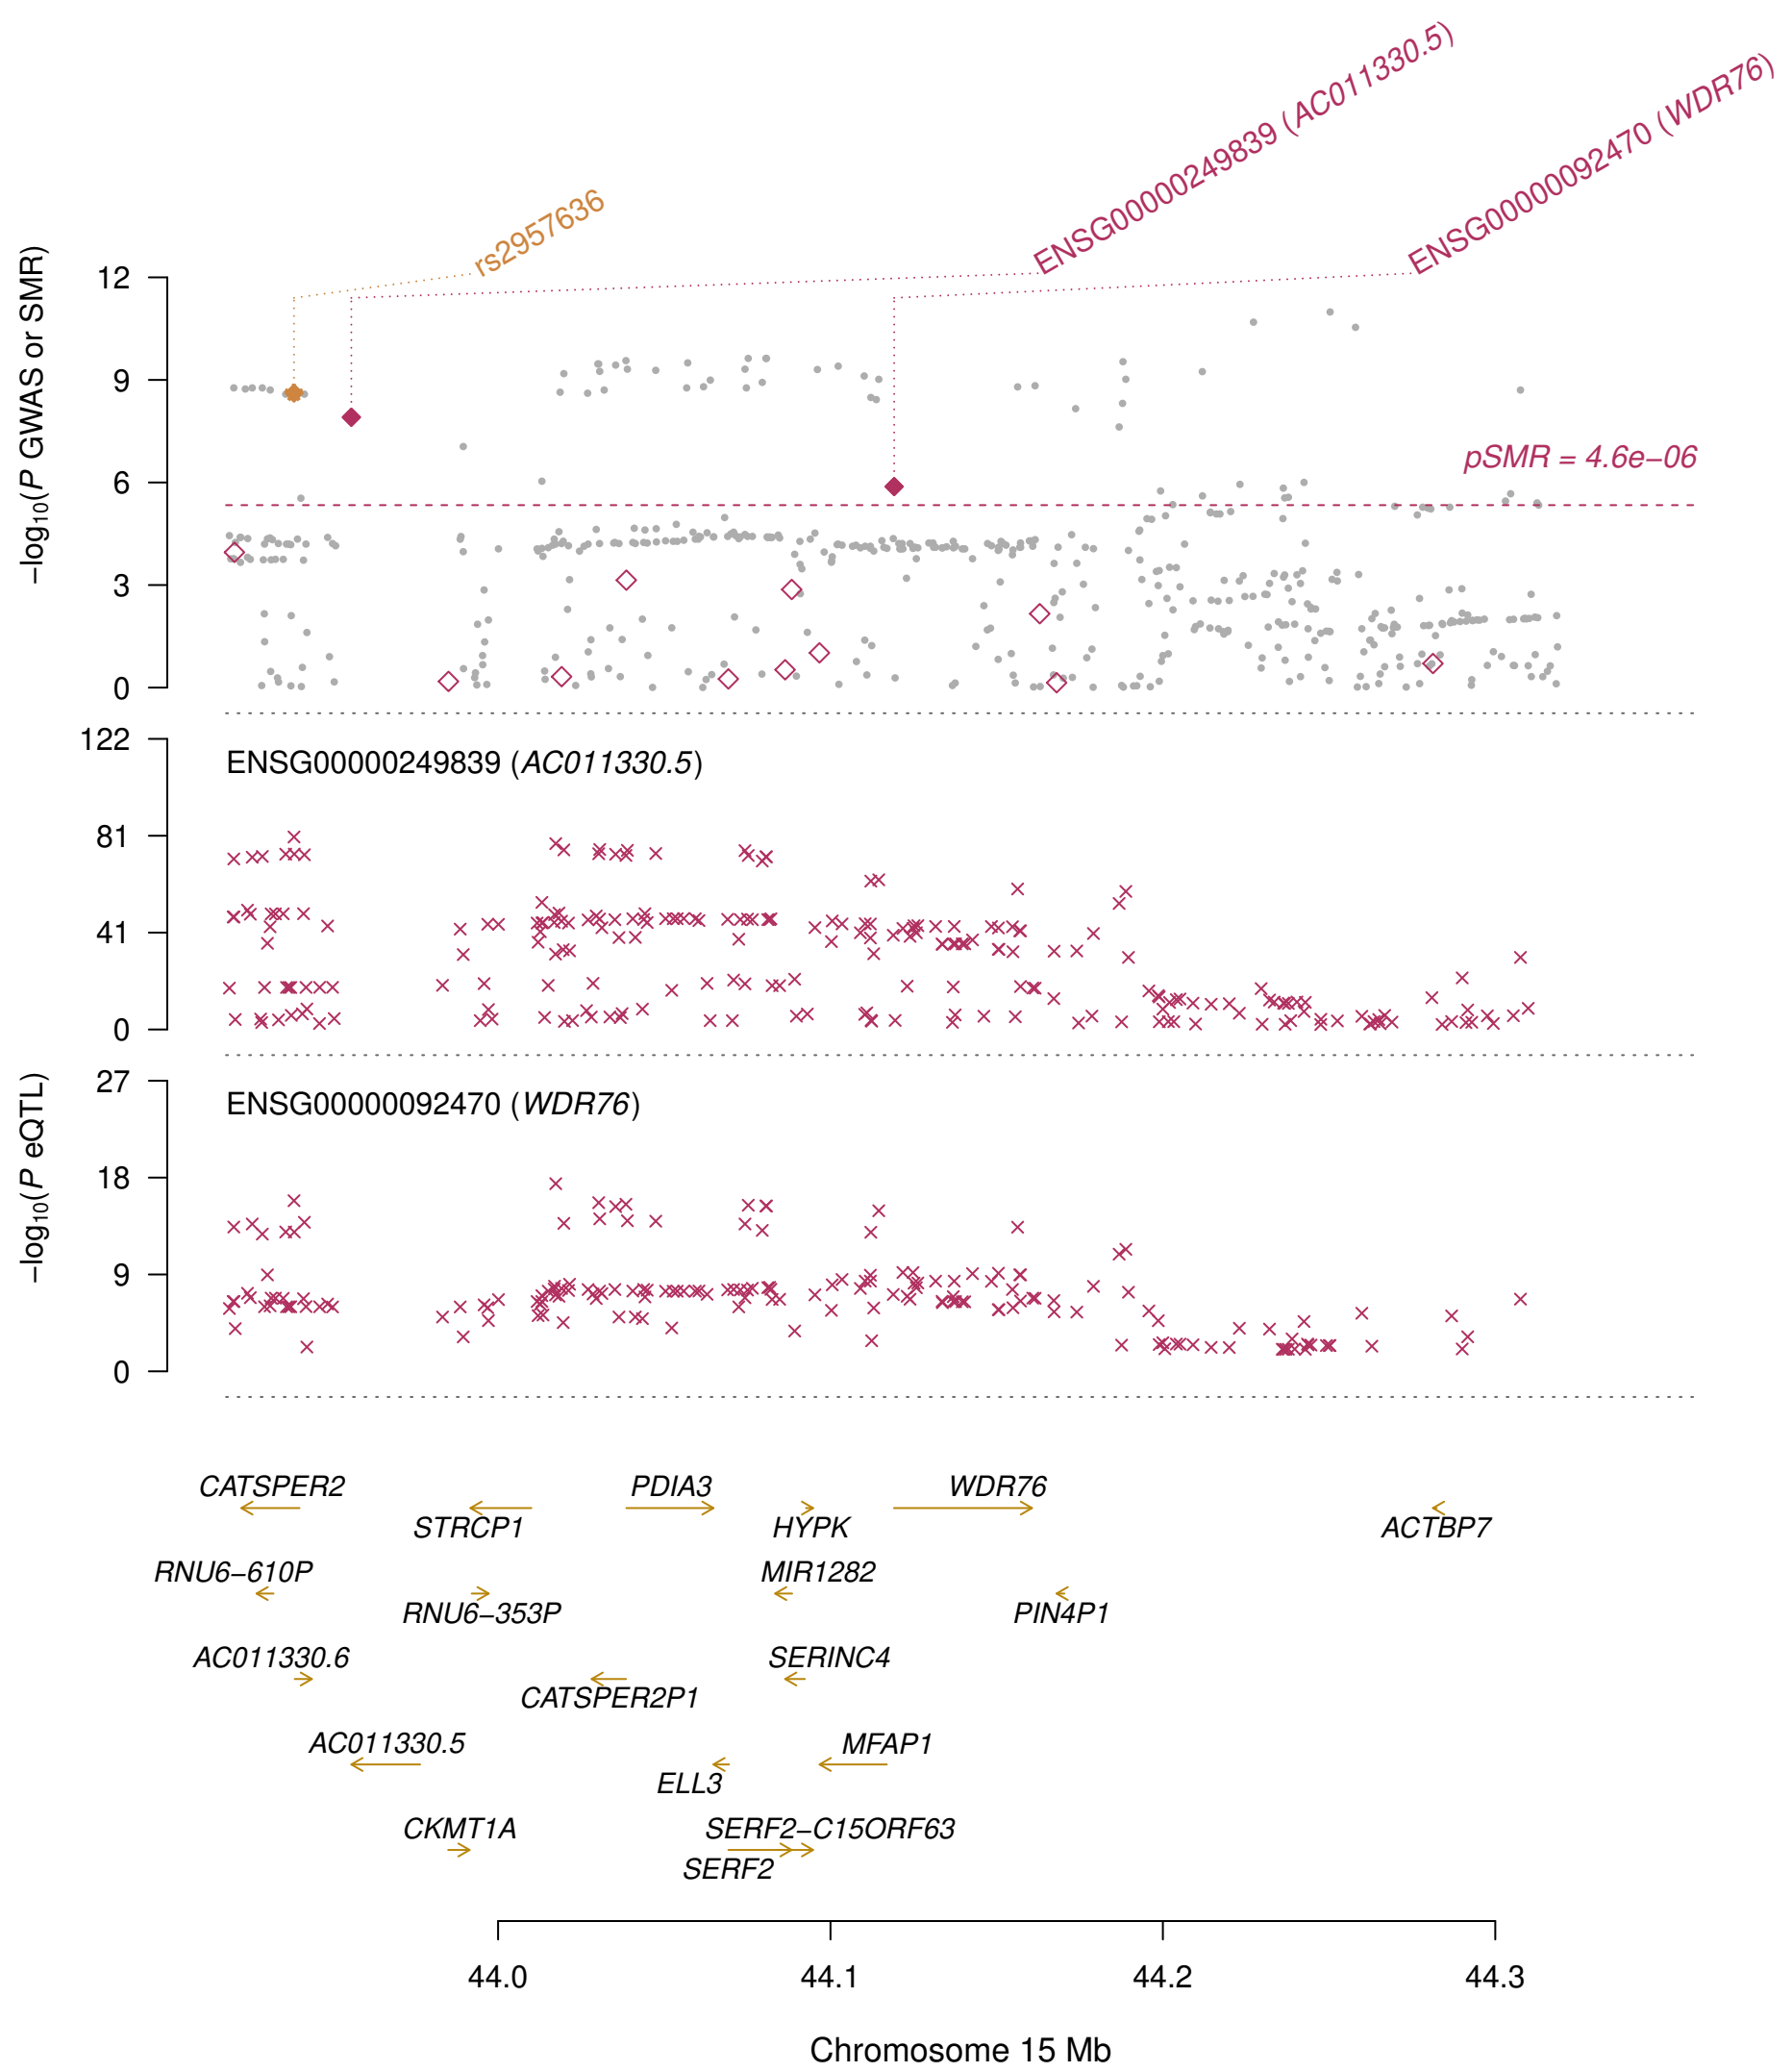

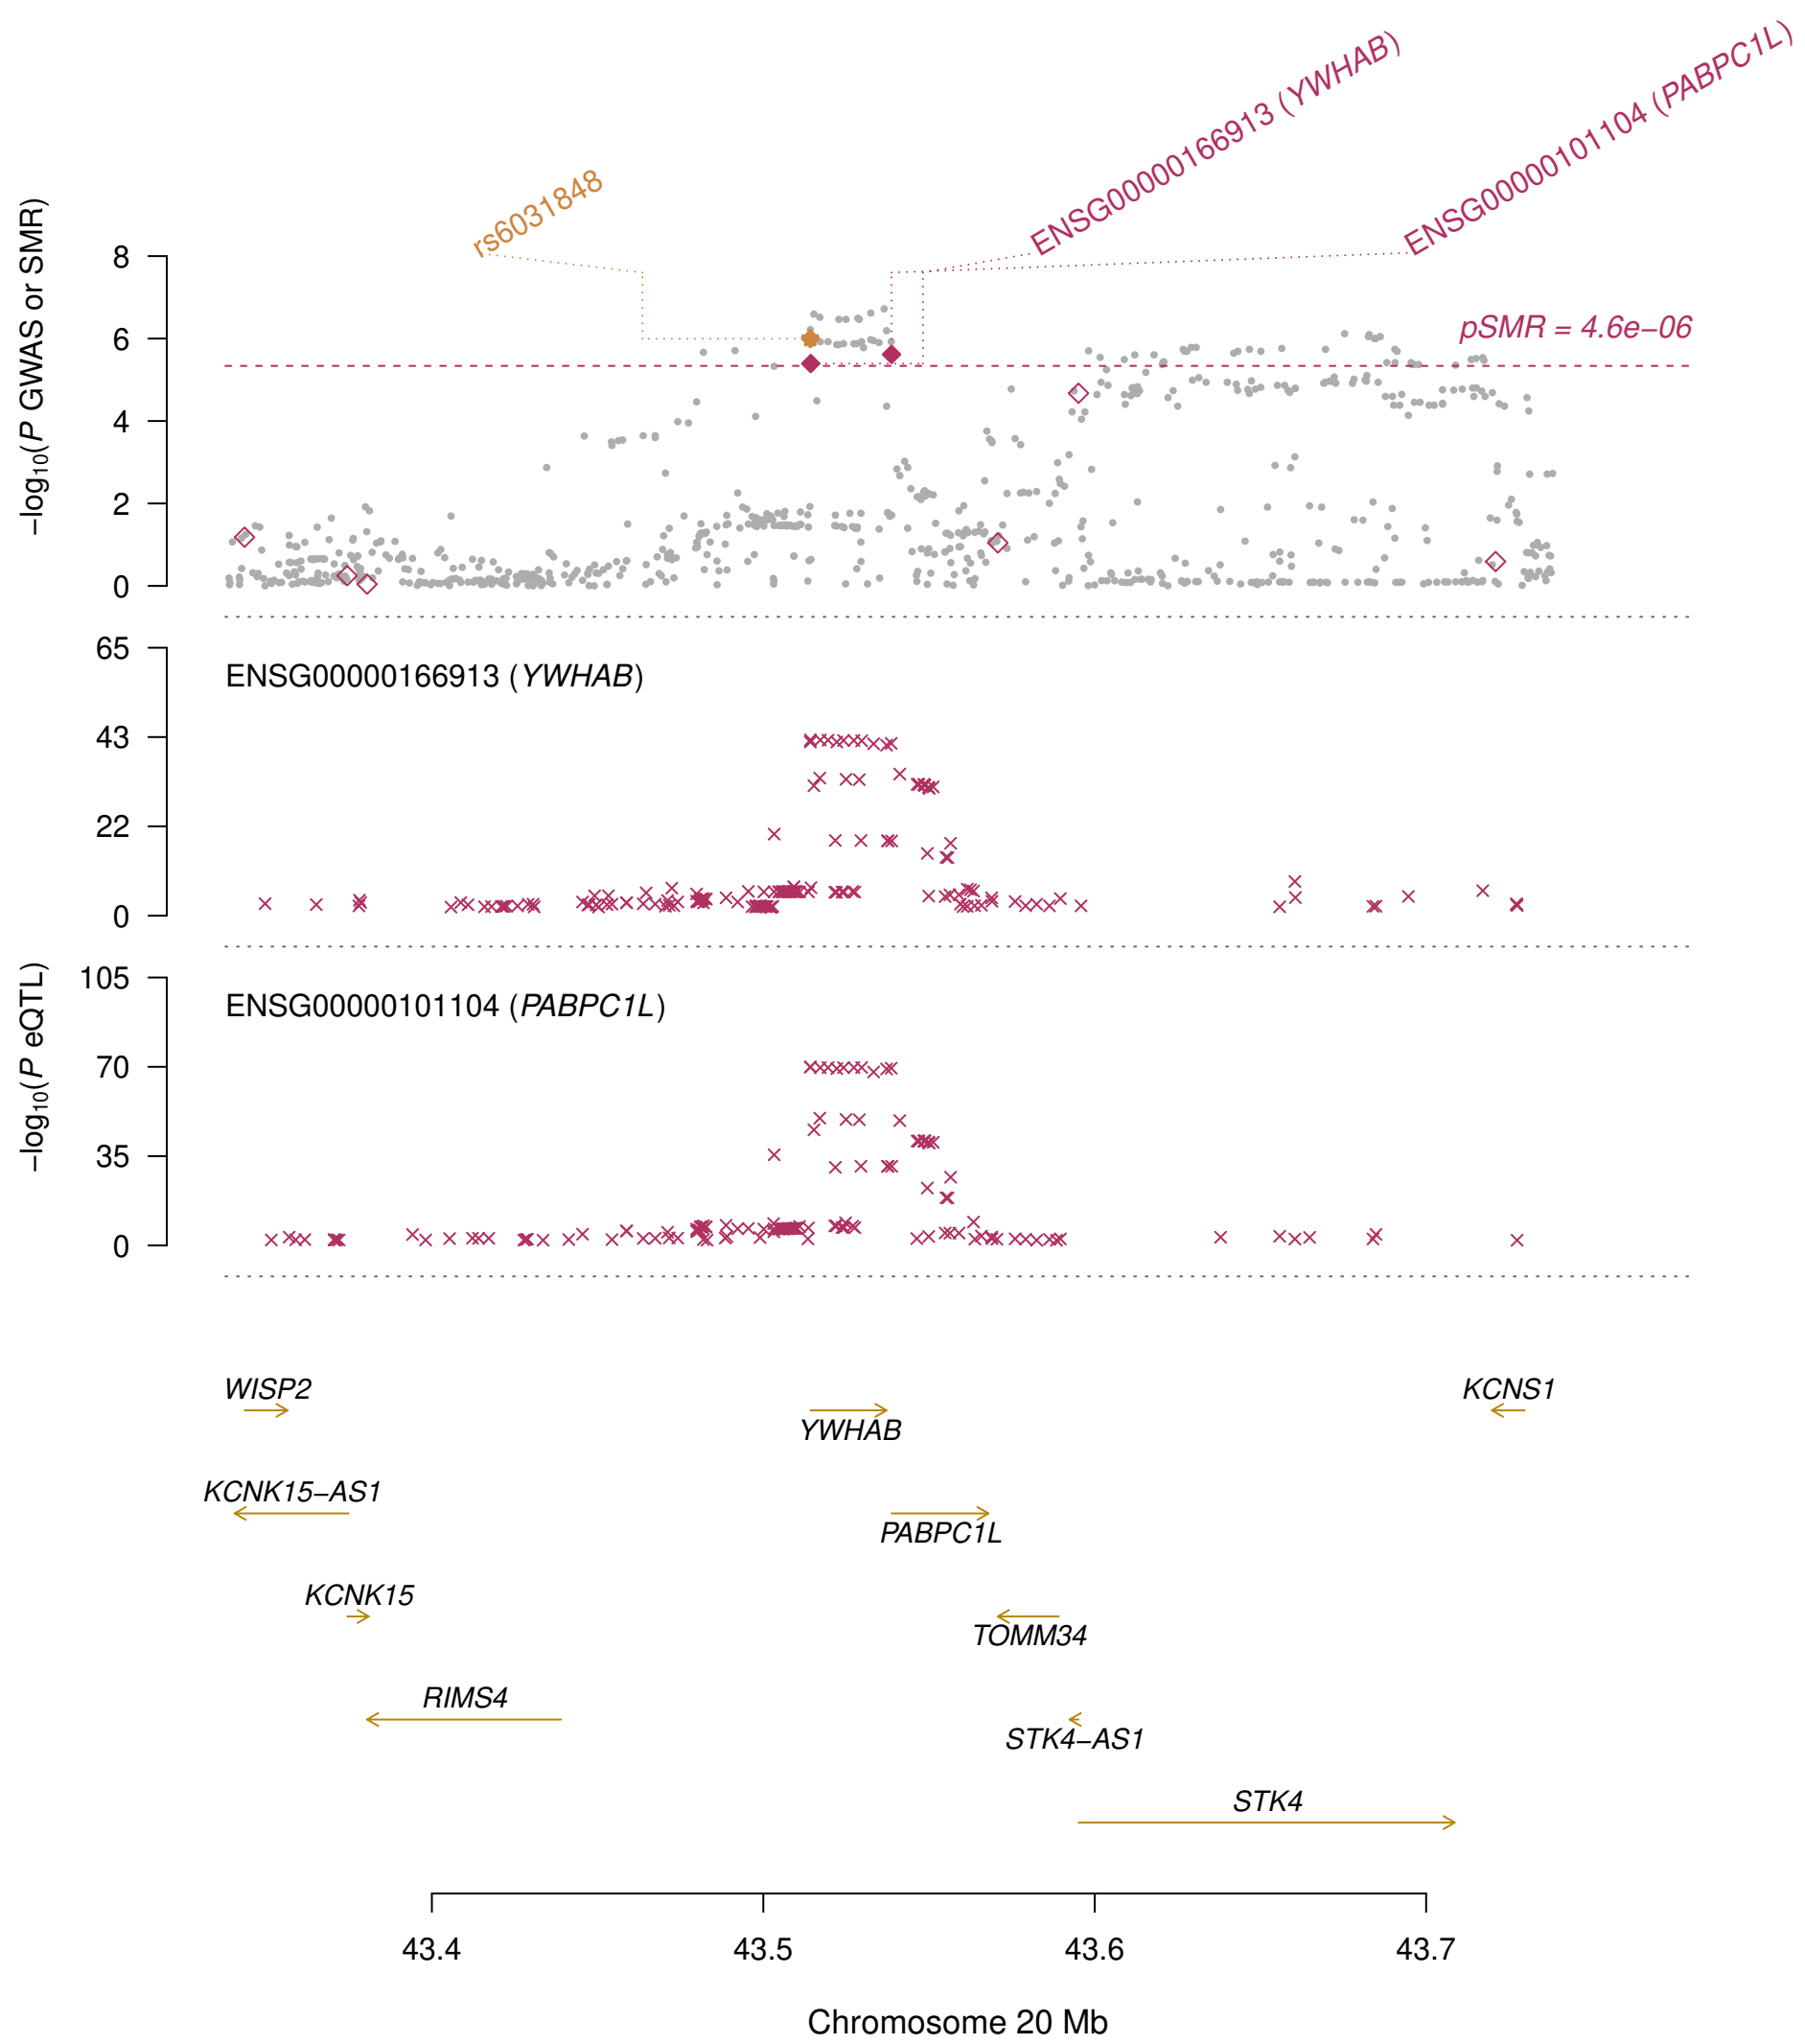

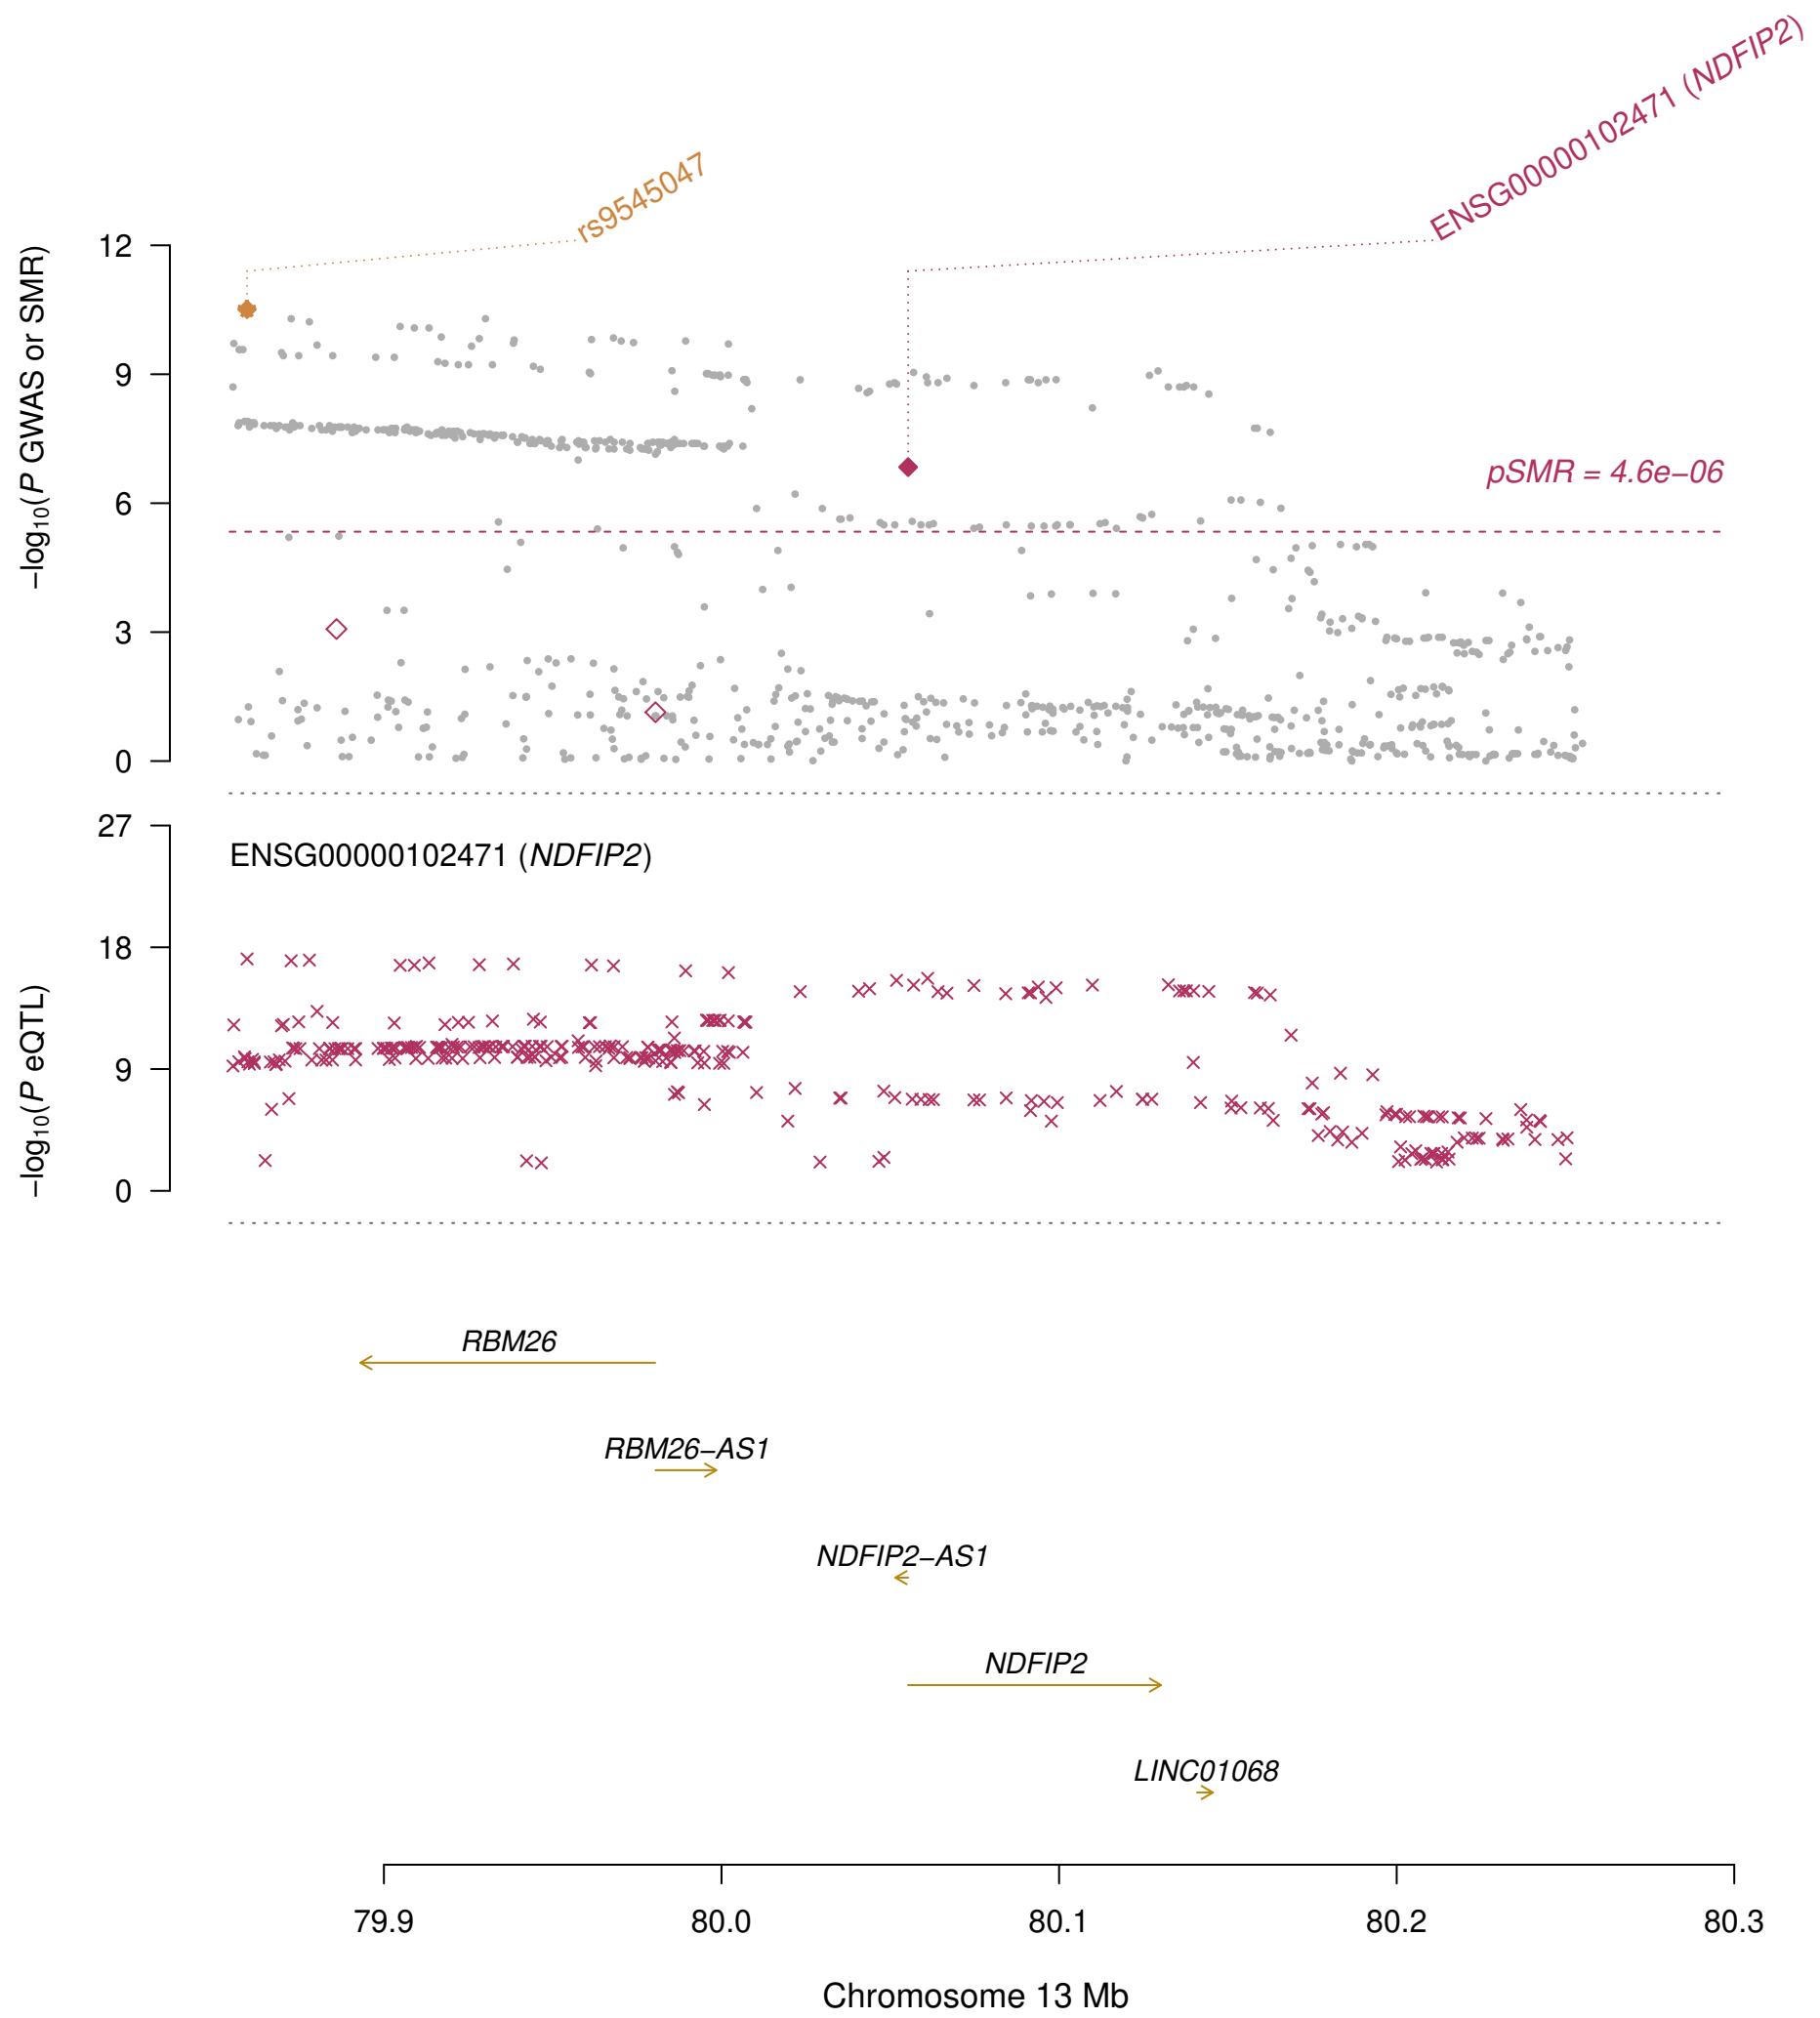

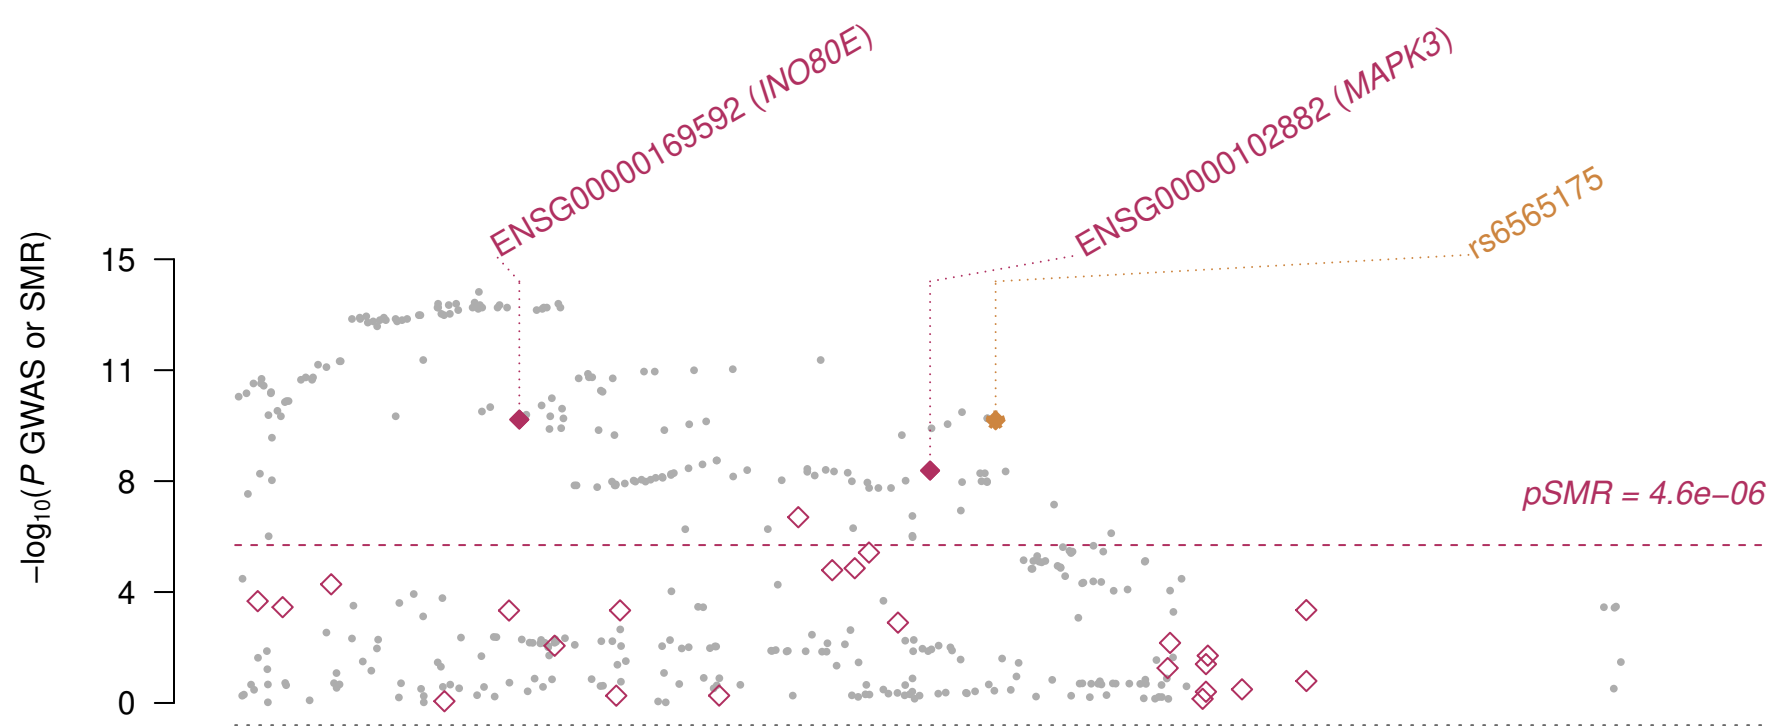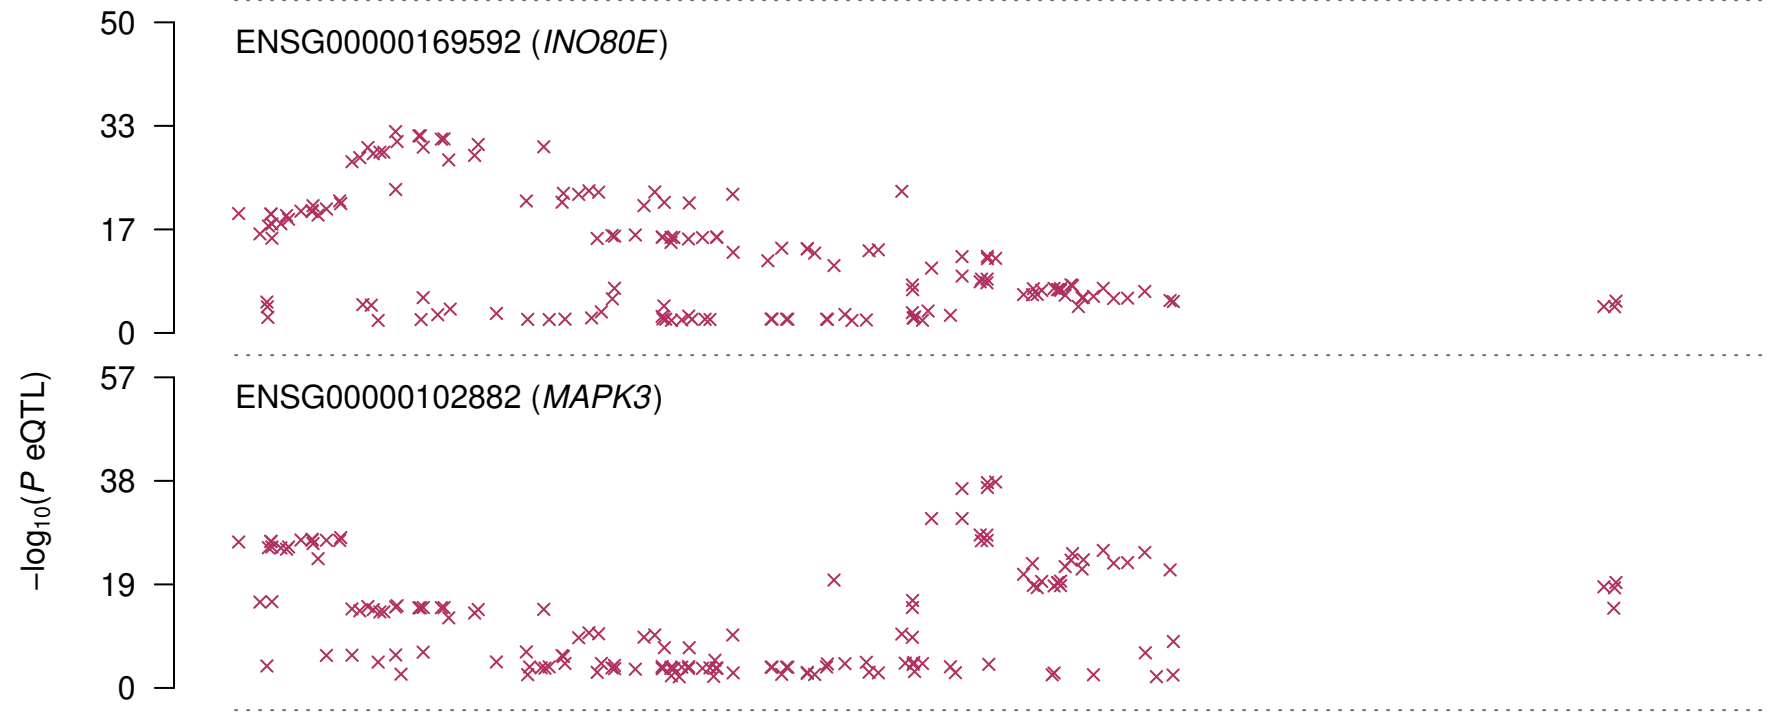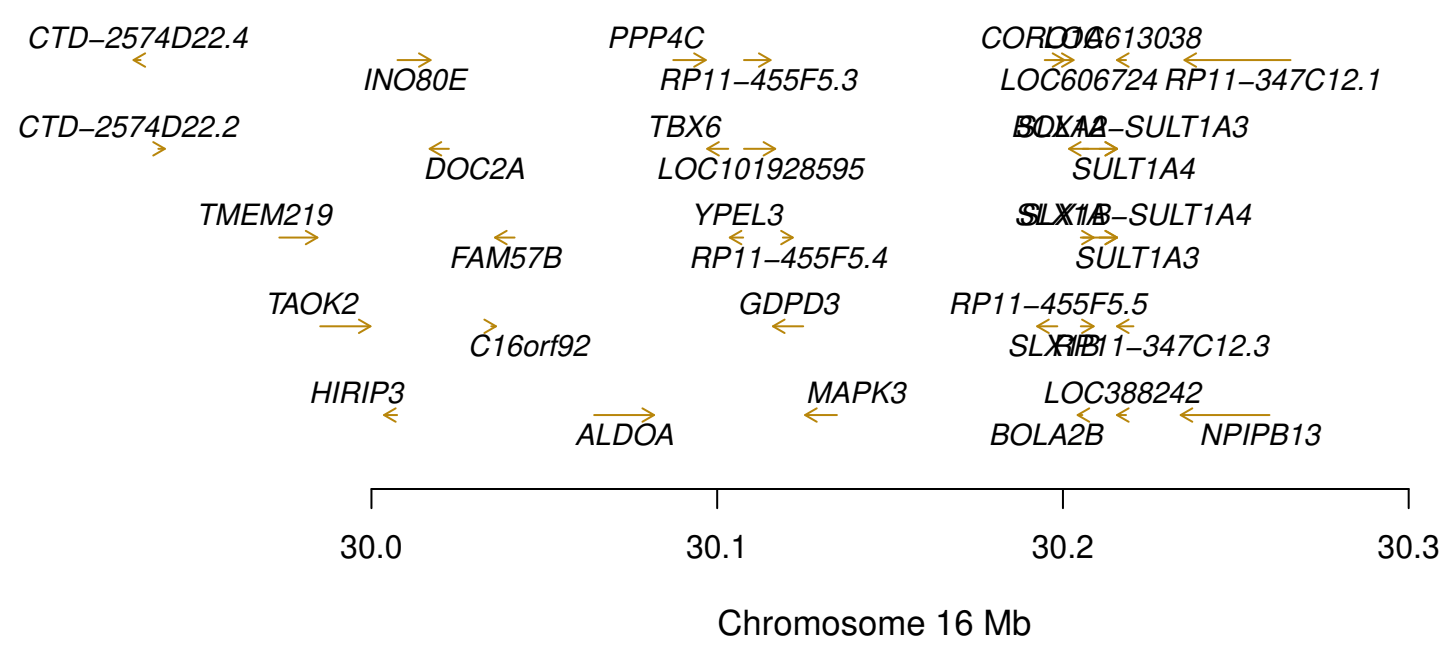

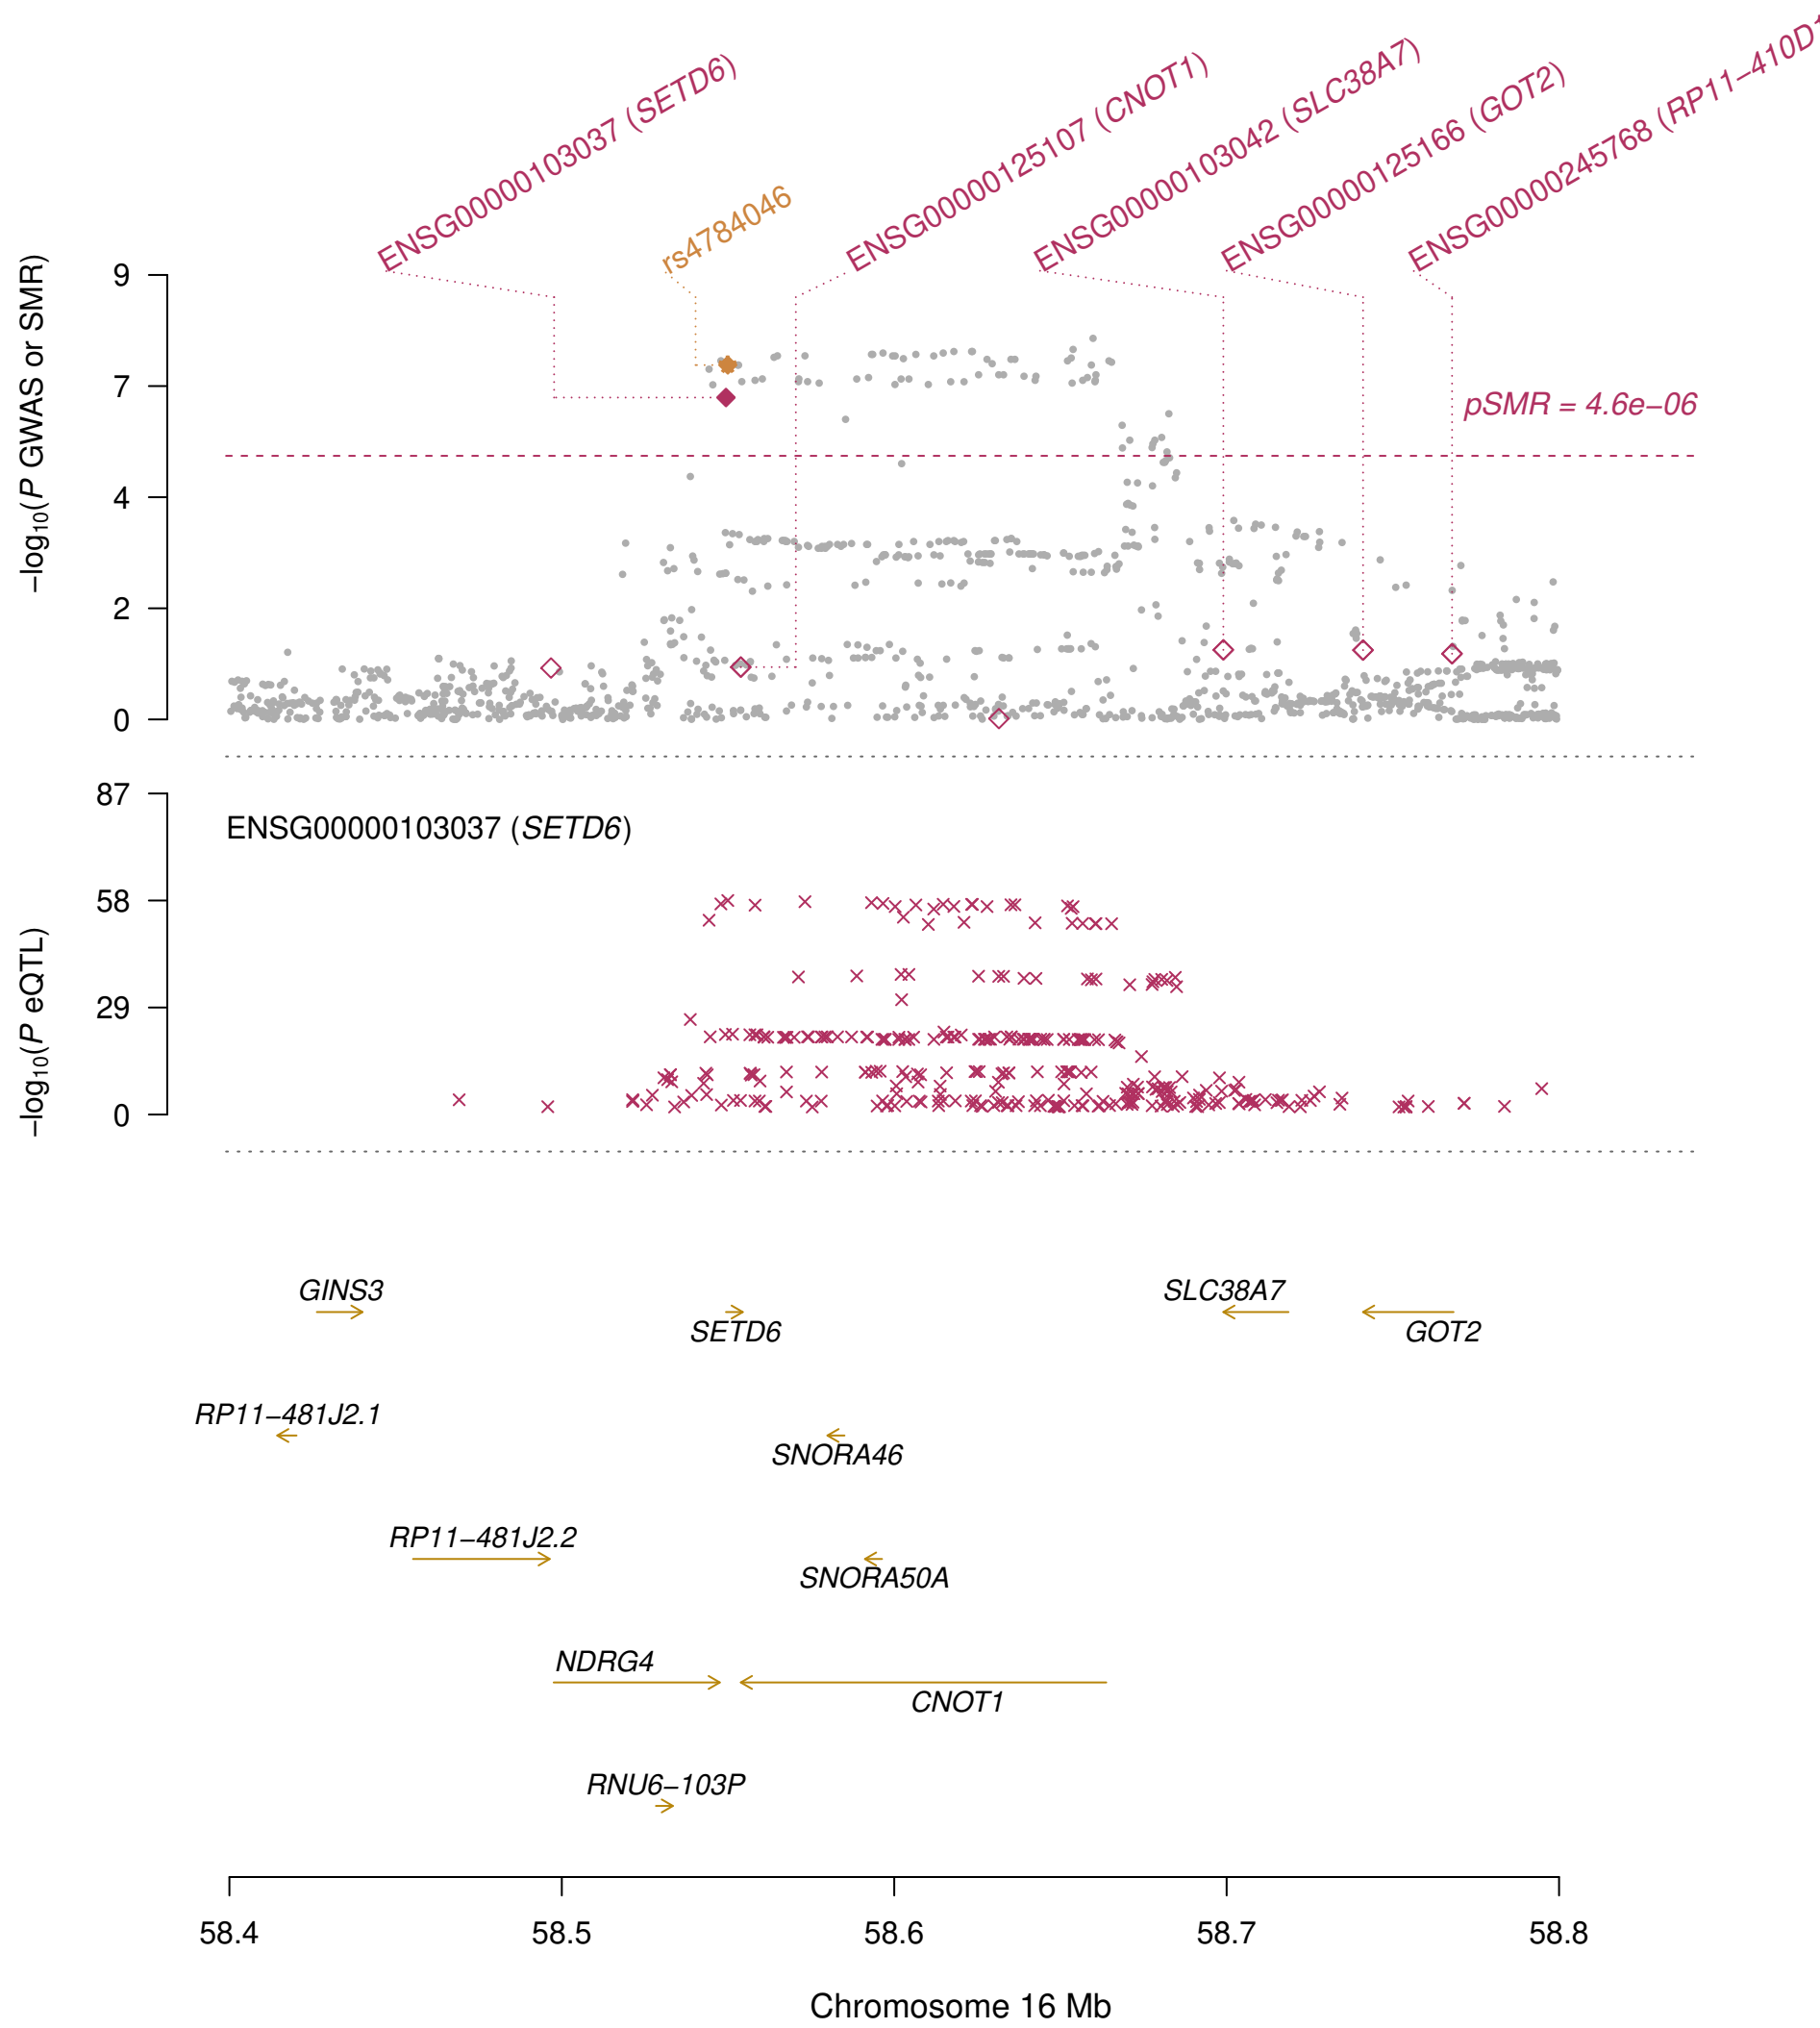

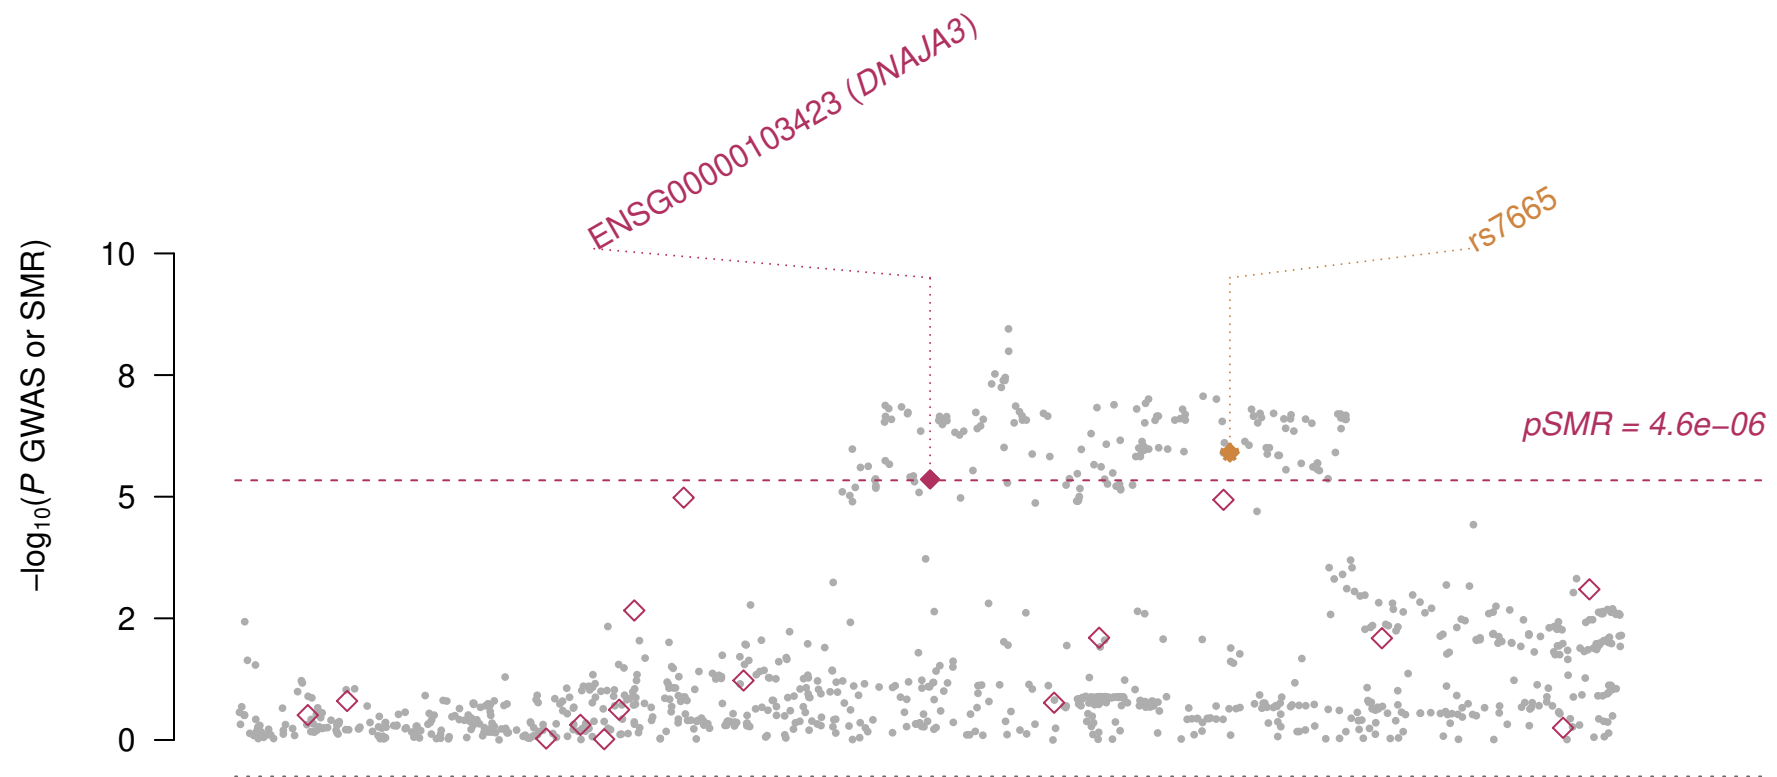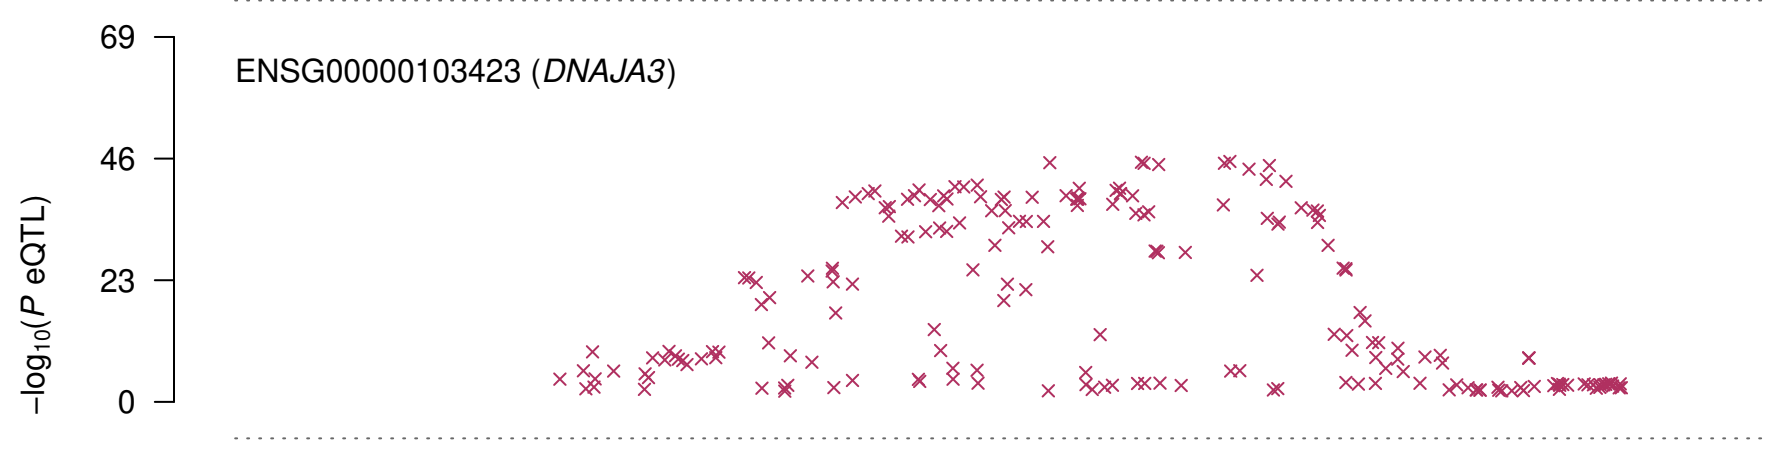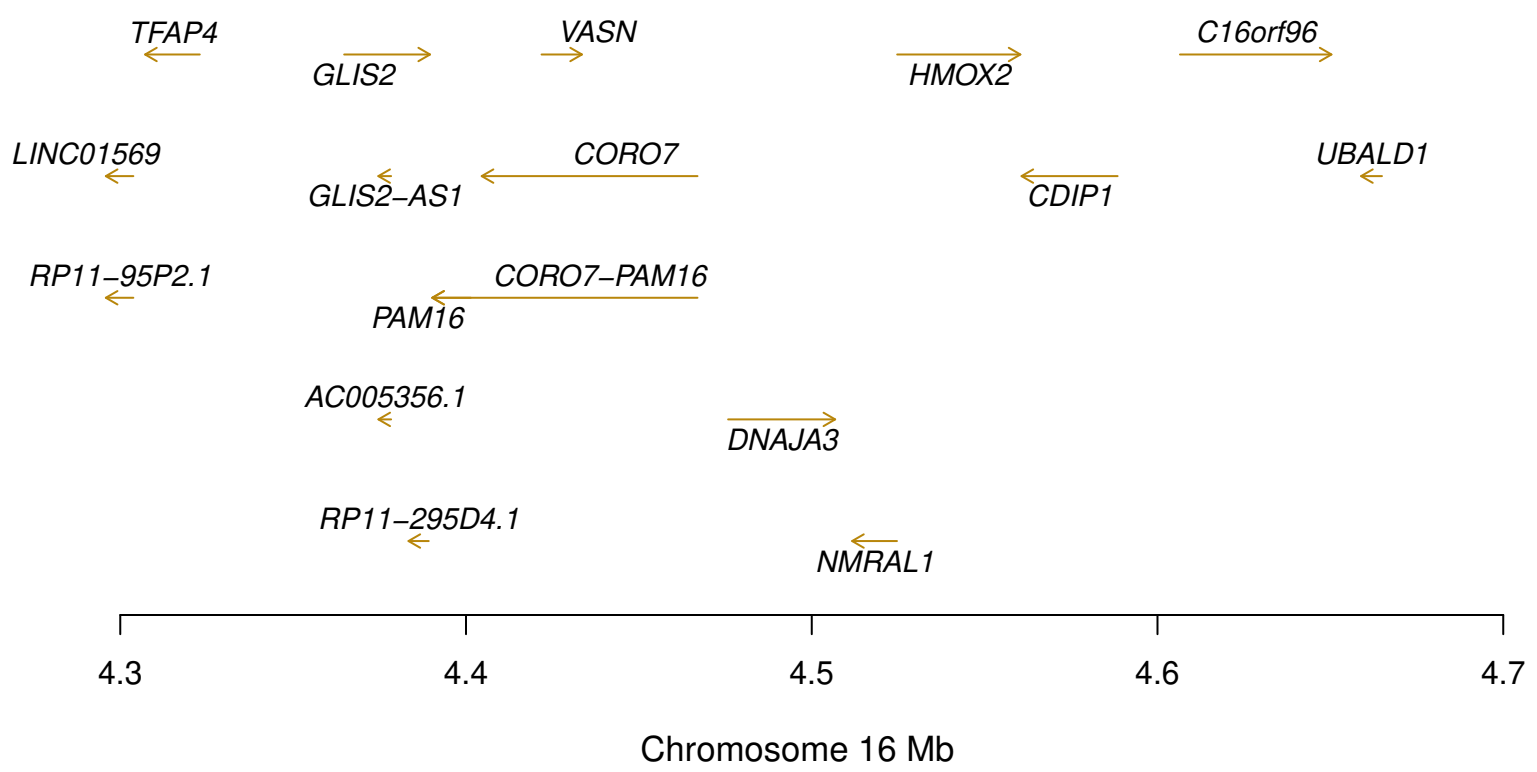

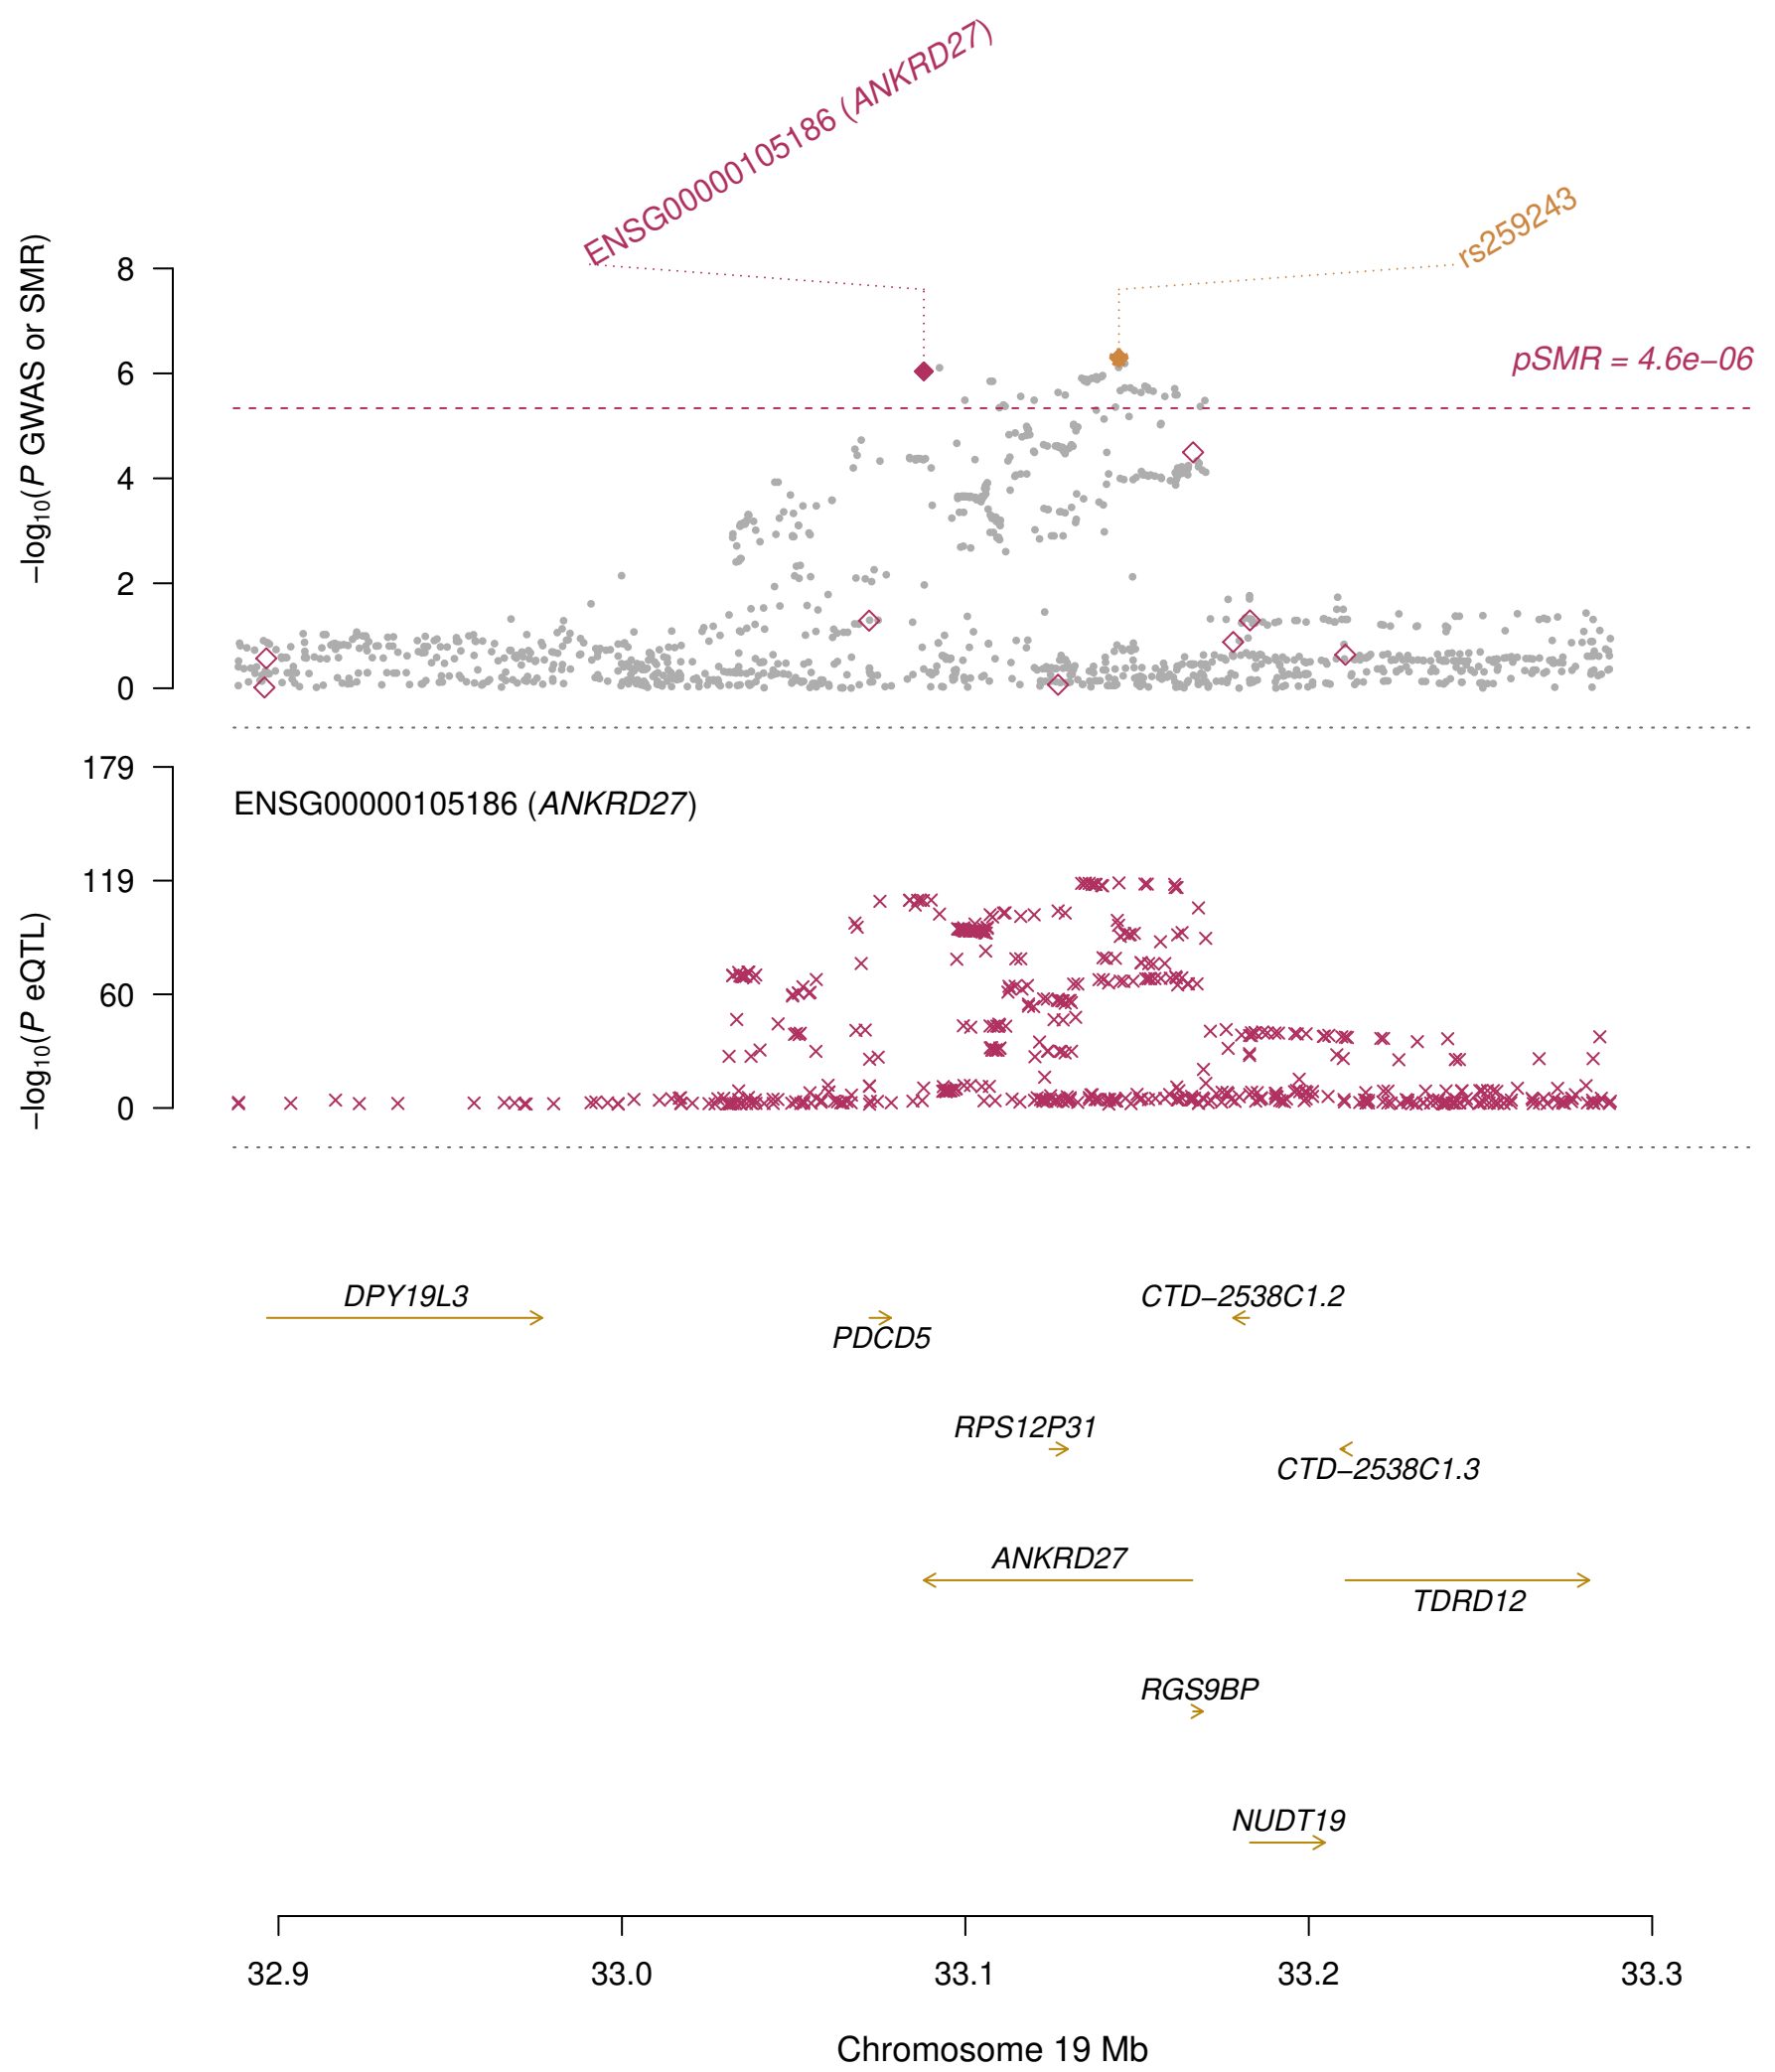

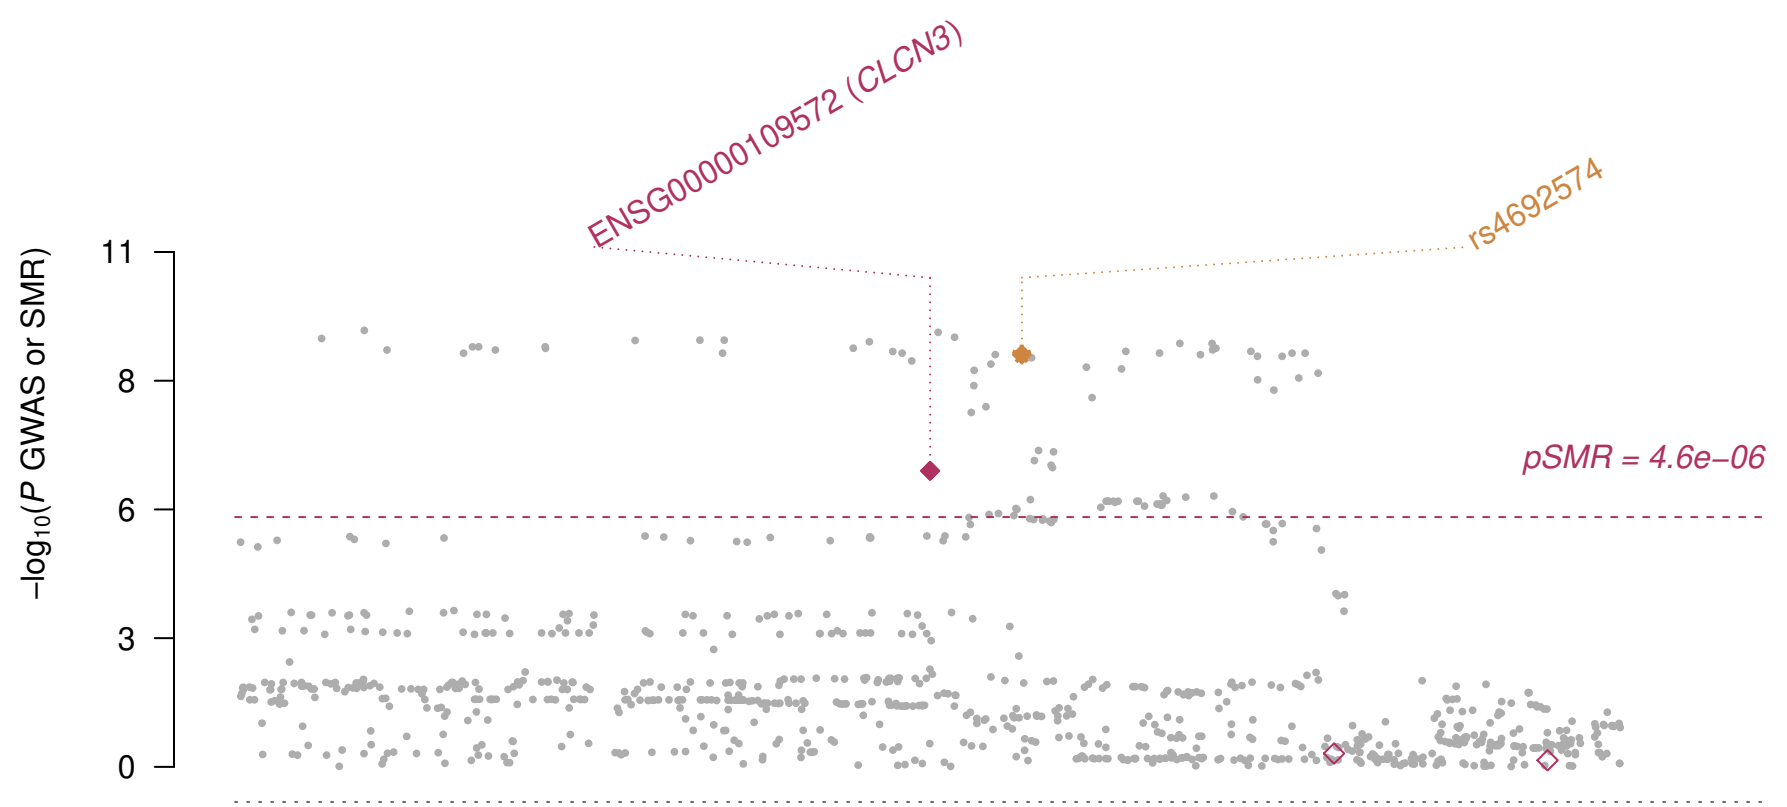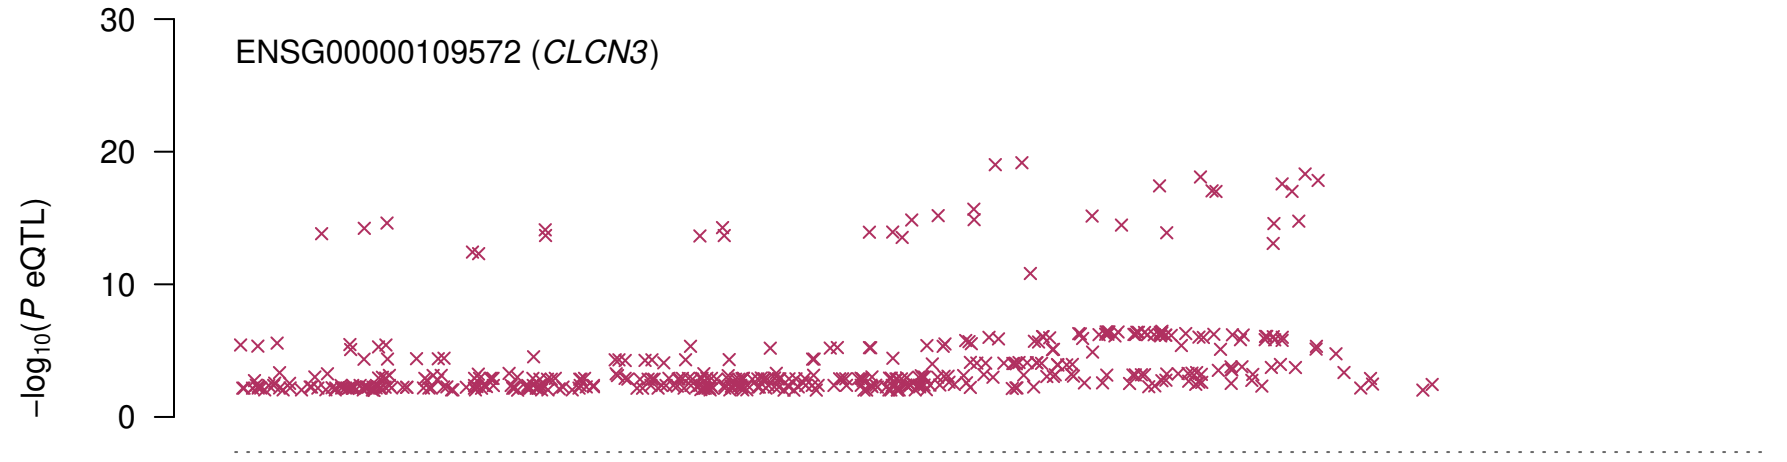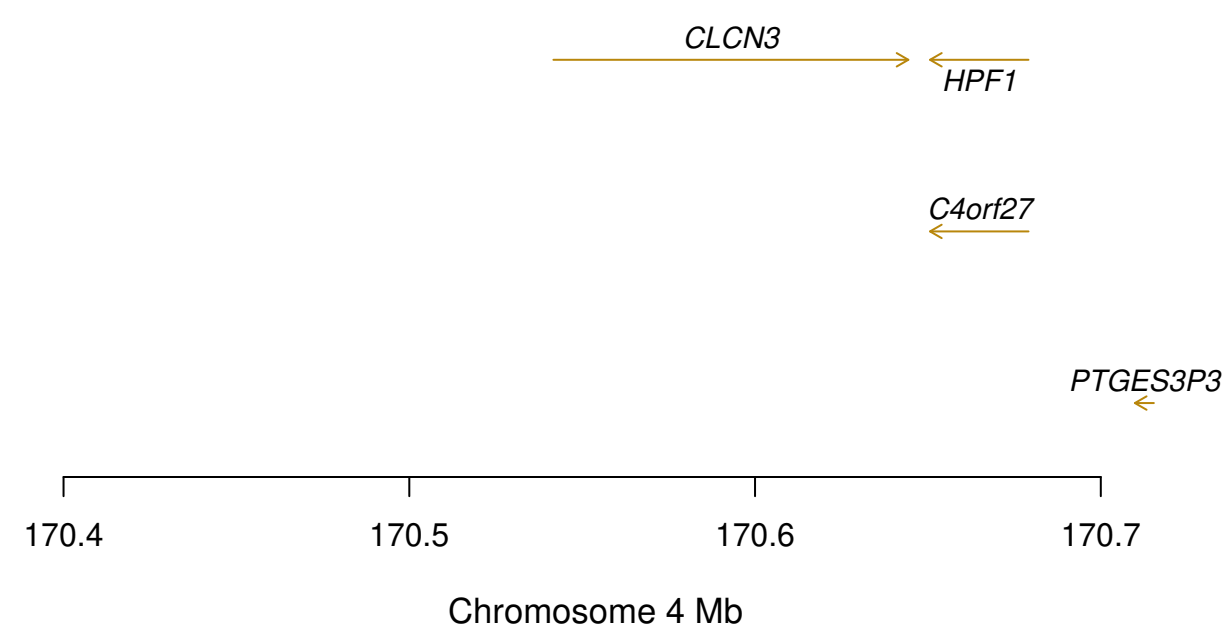



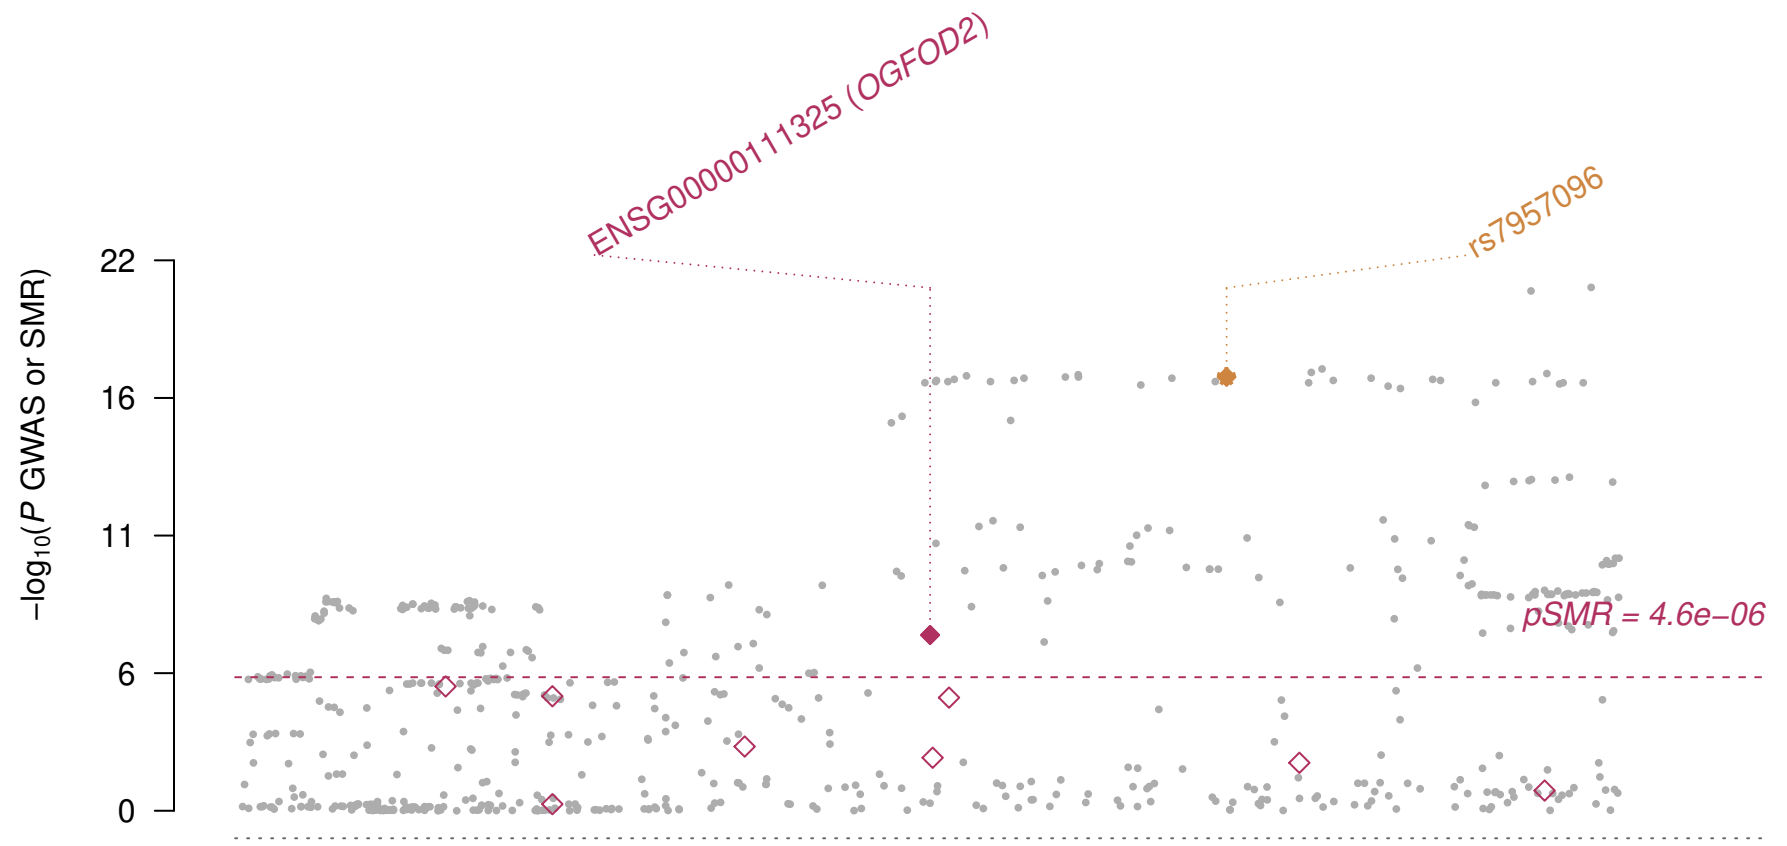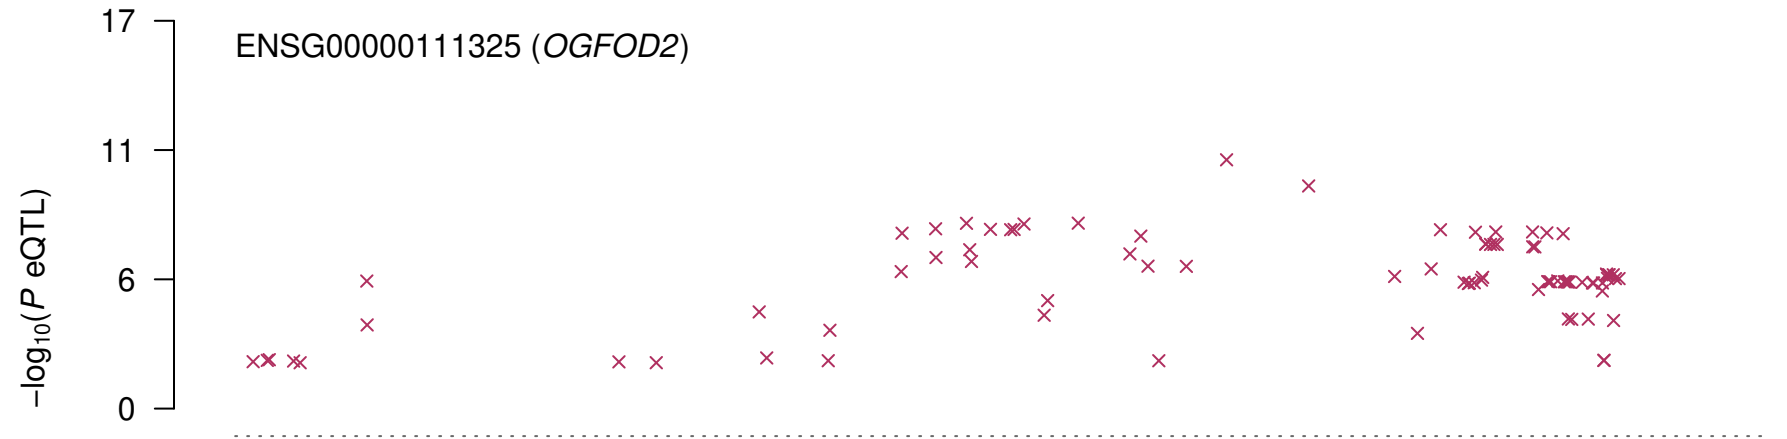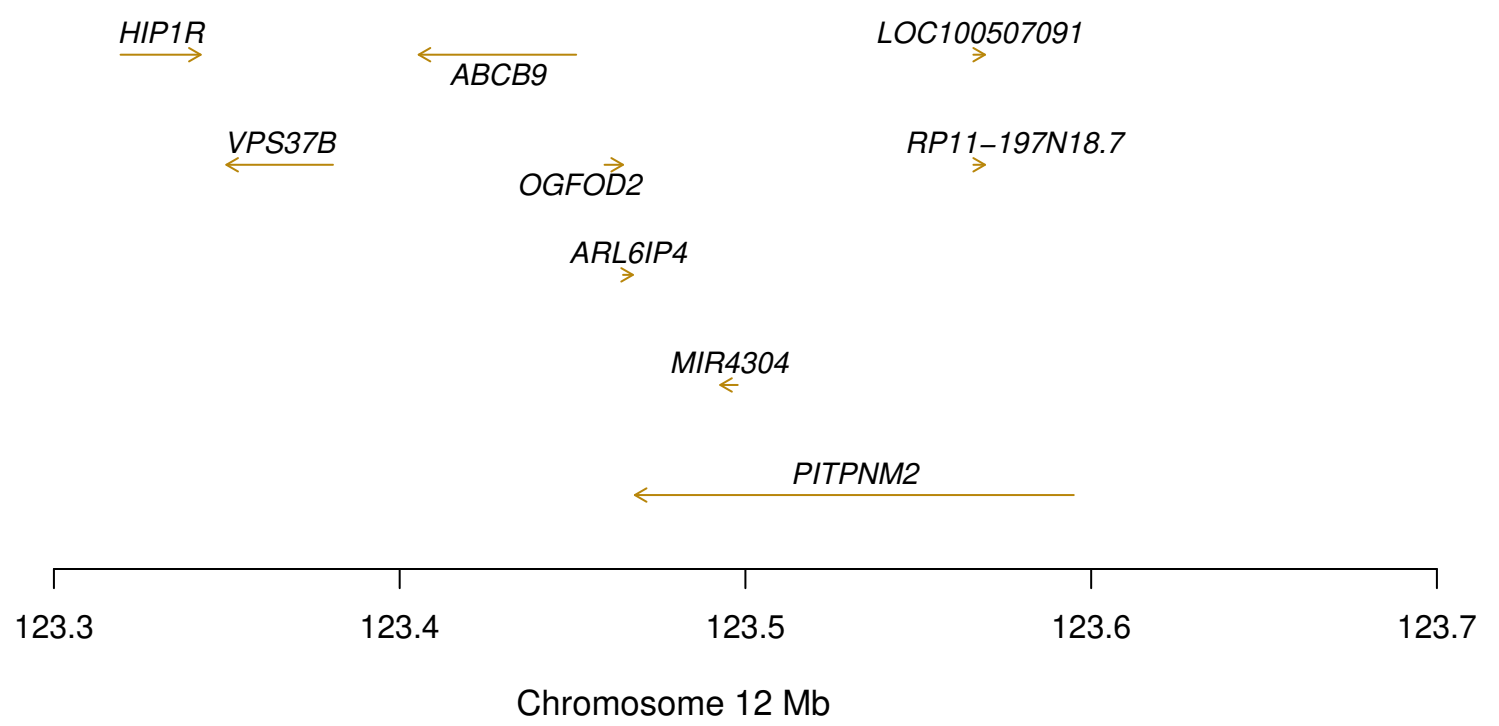

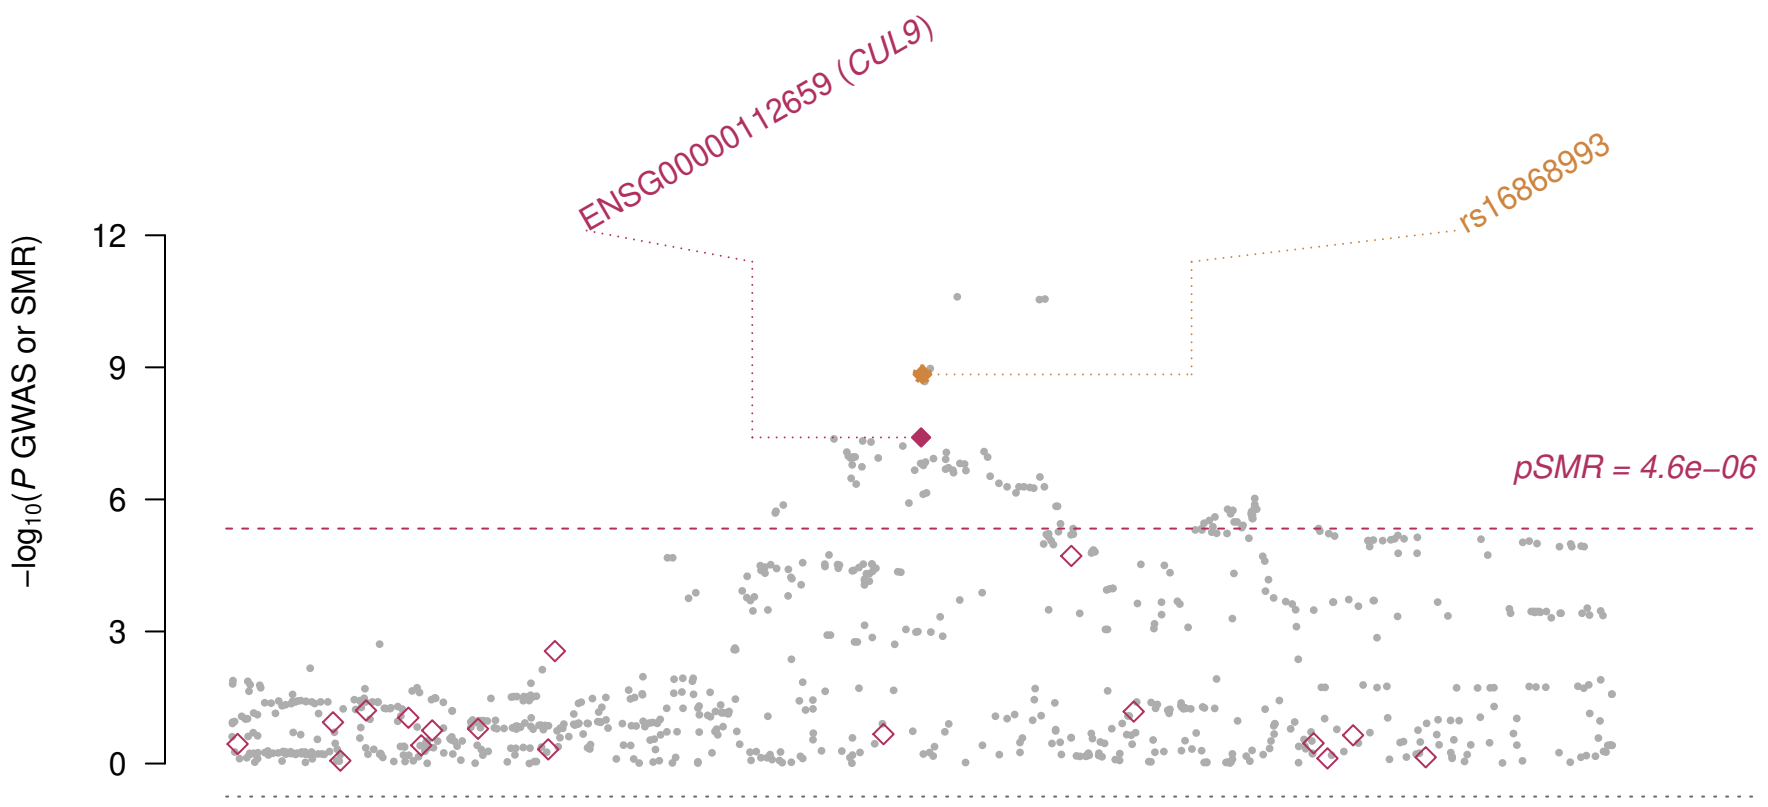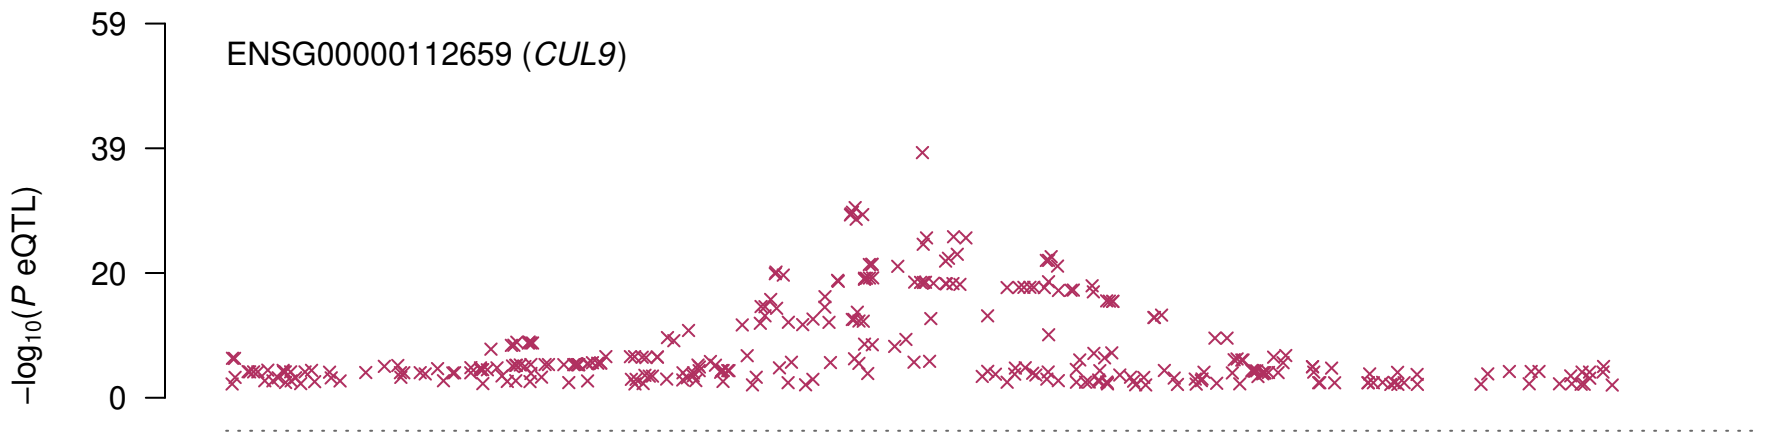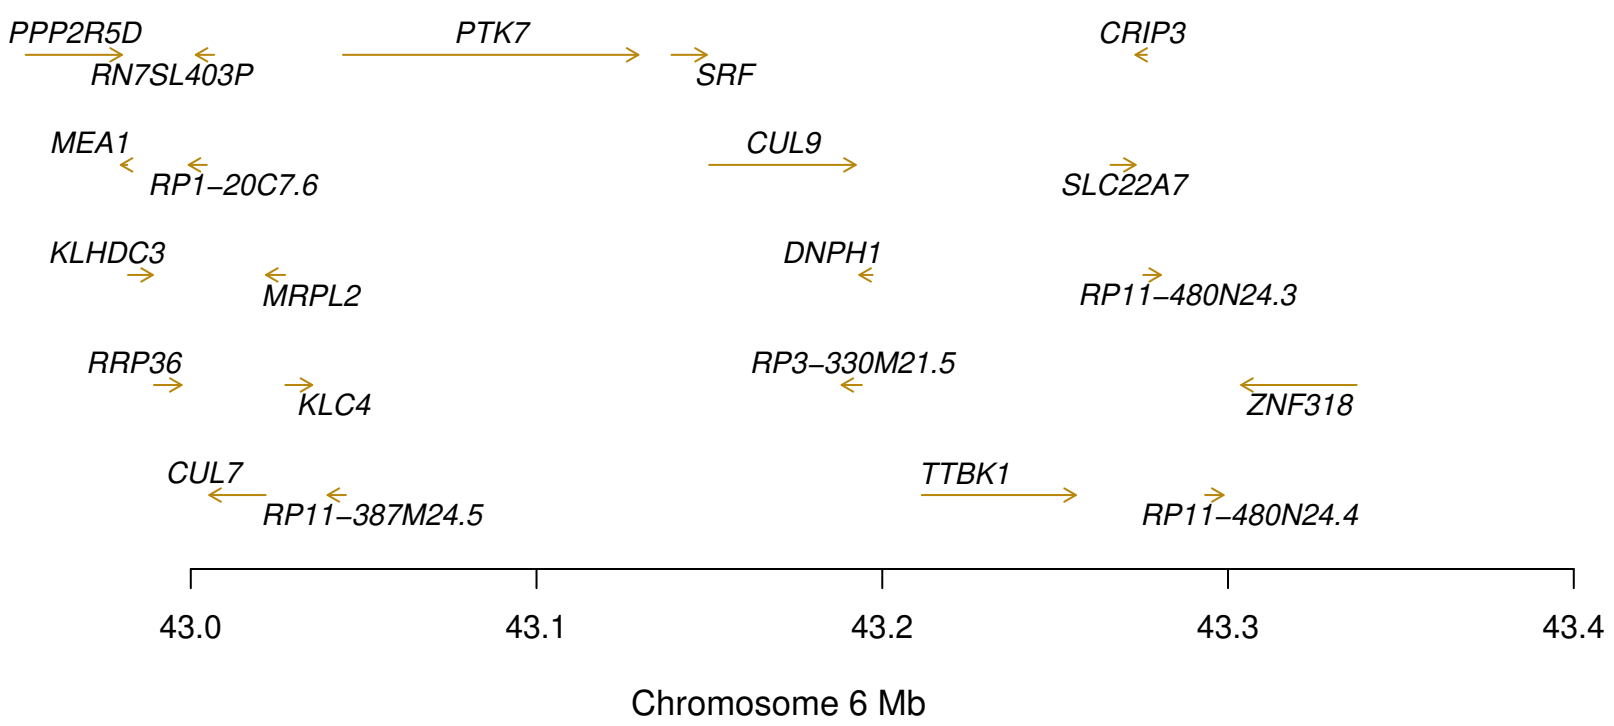

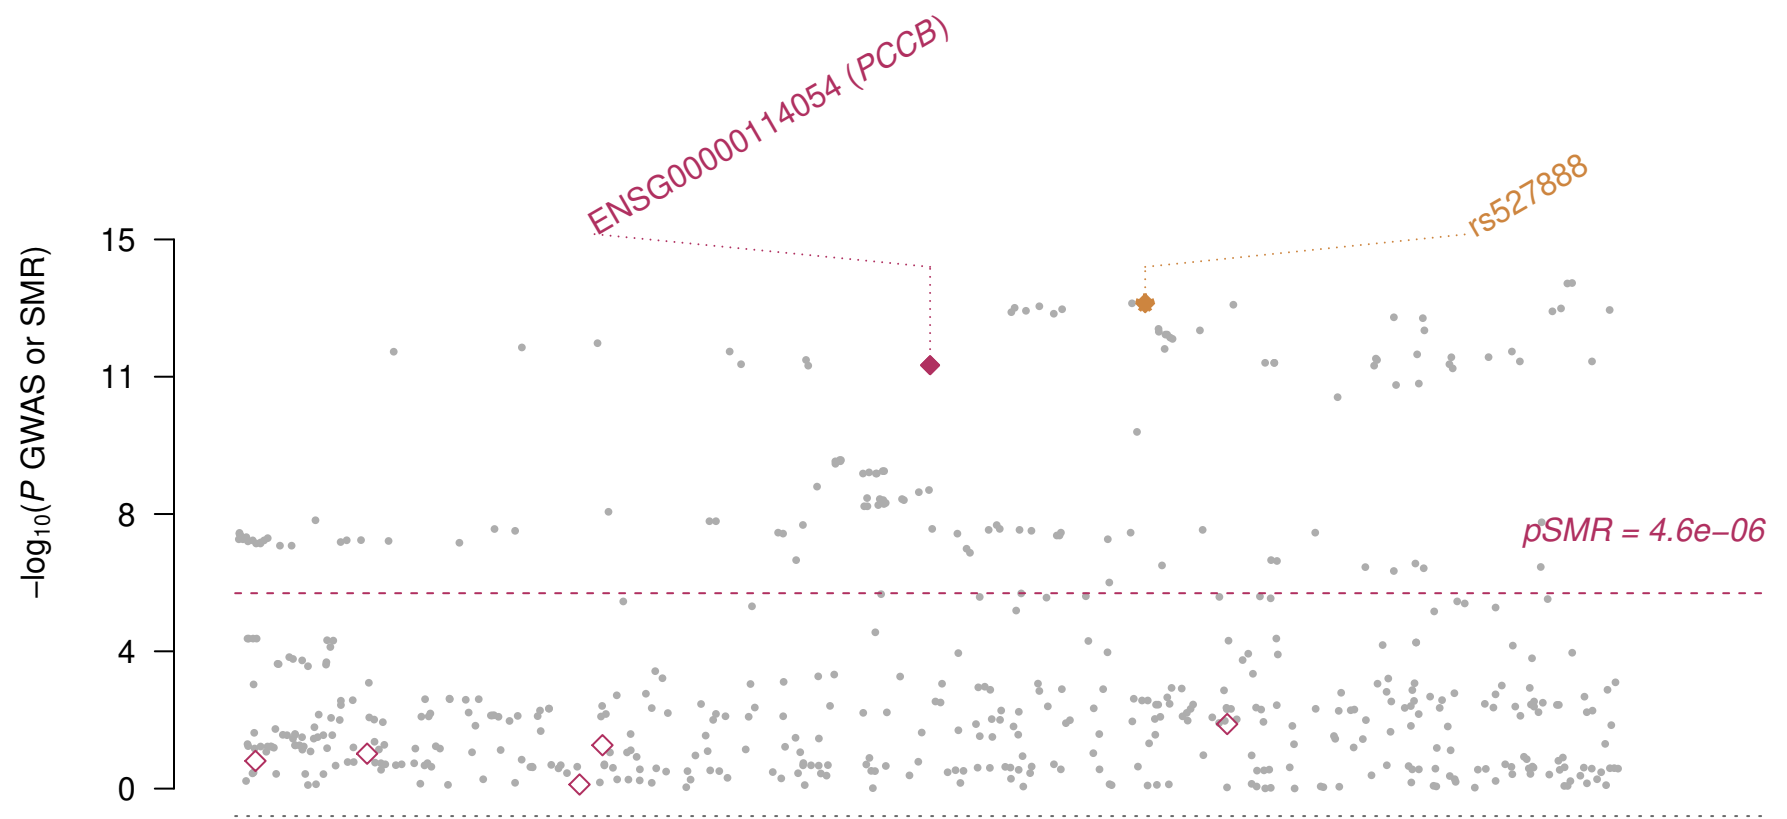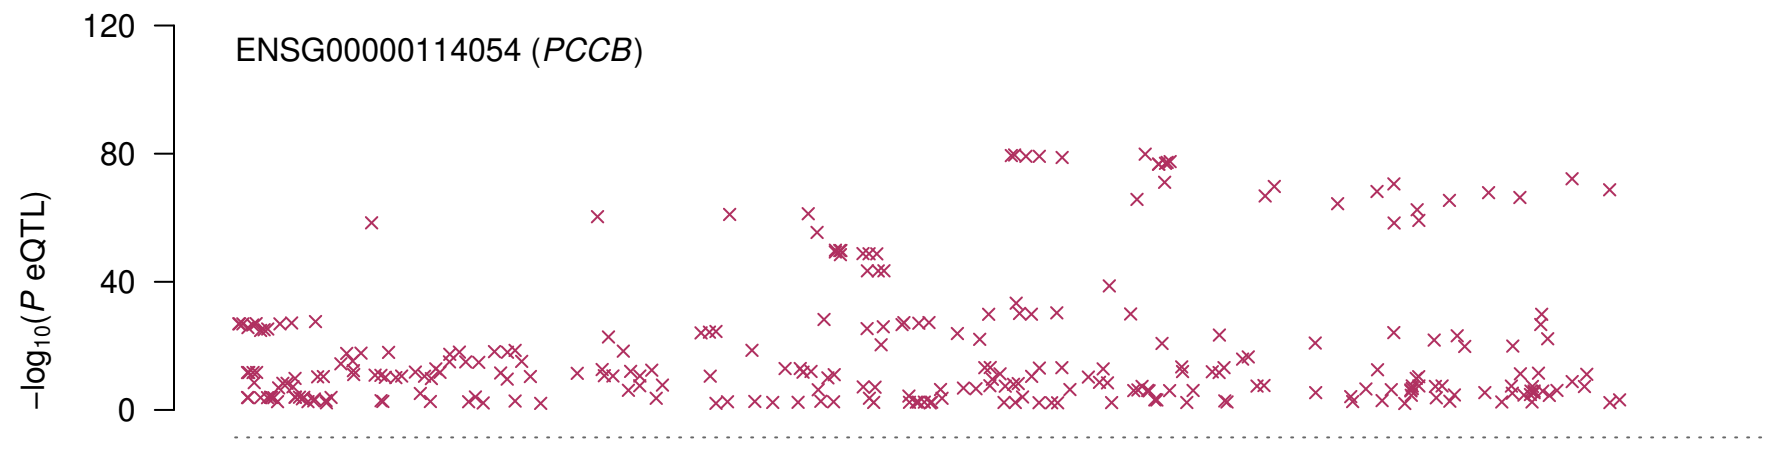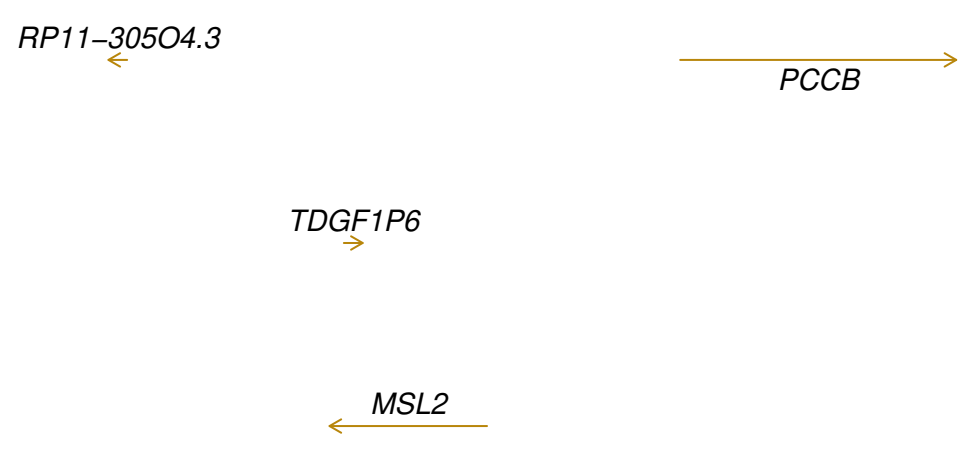

135.8      135.9      136.0      136.1      136.2

Chromosome 3 Mb

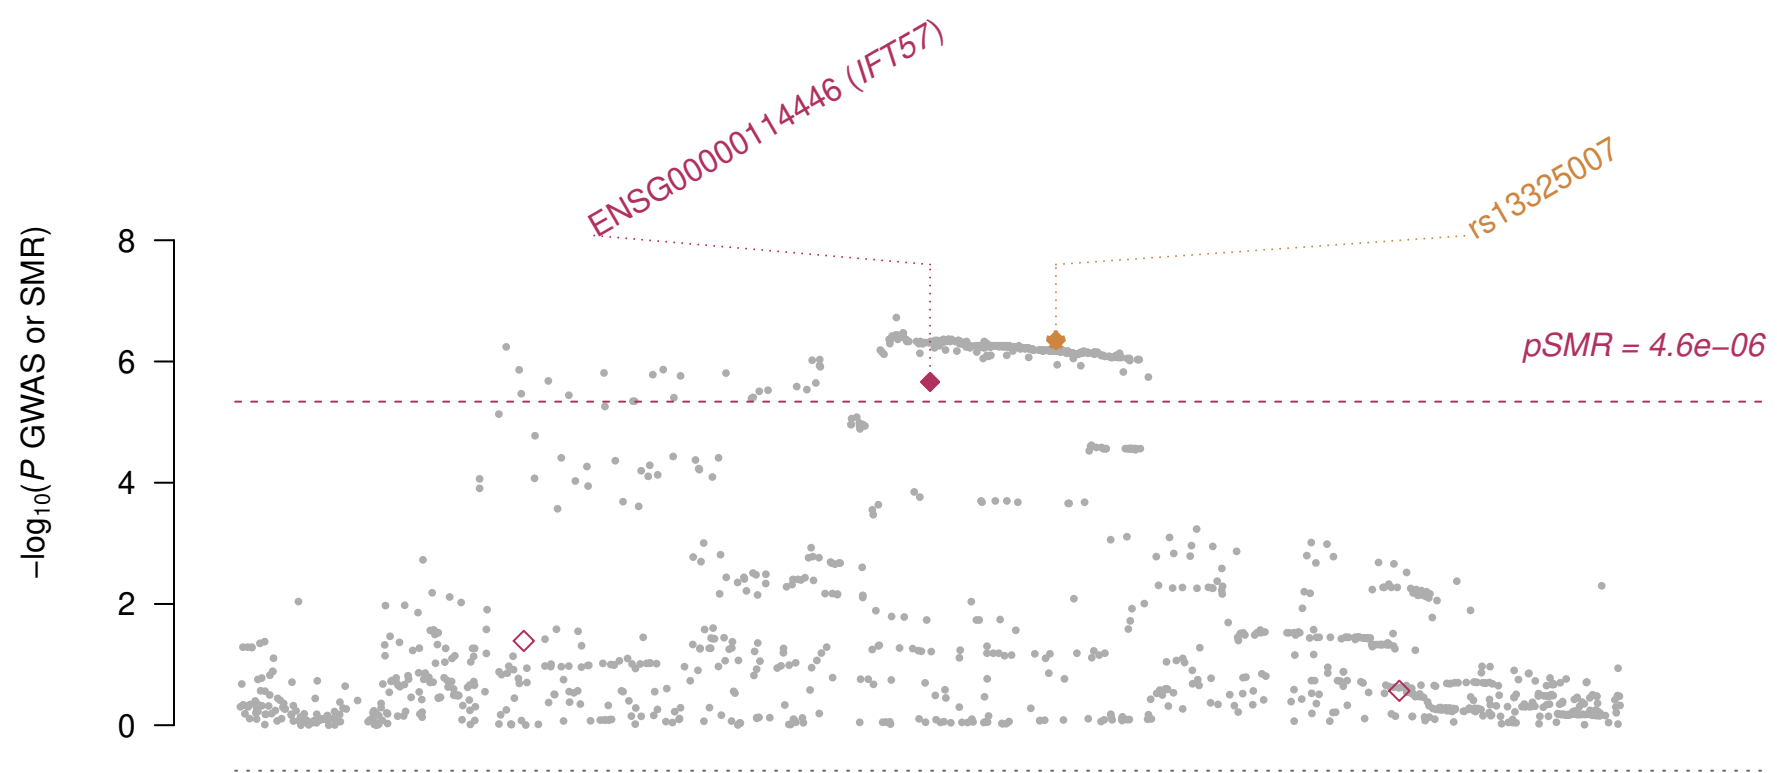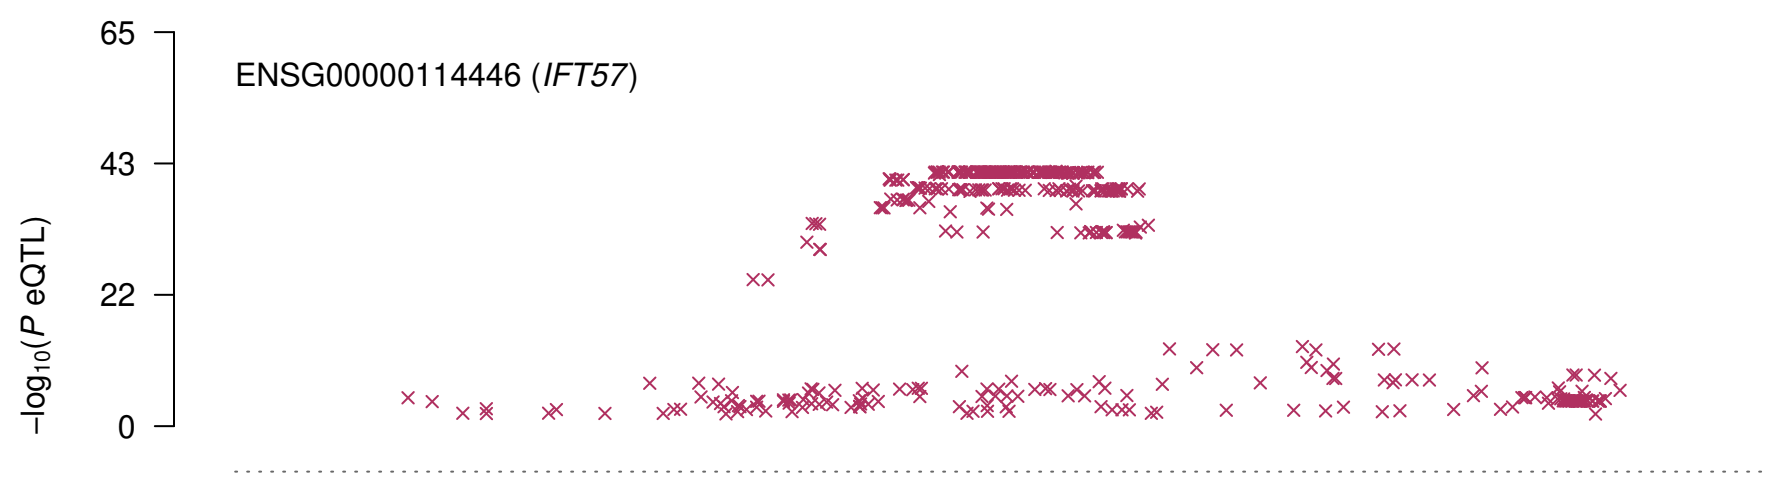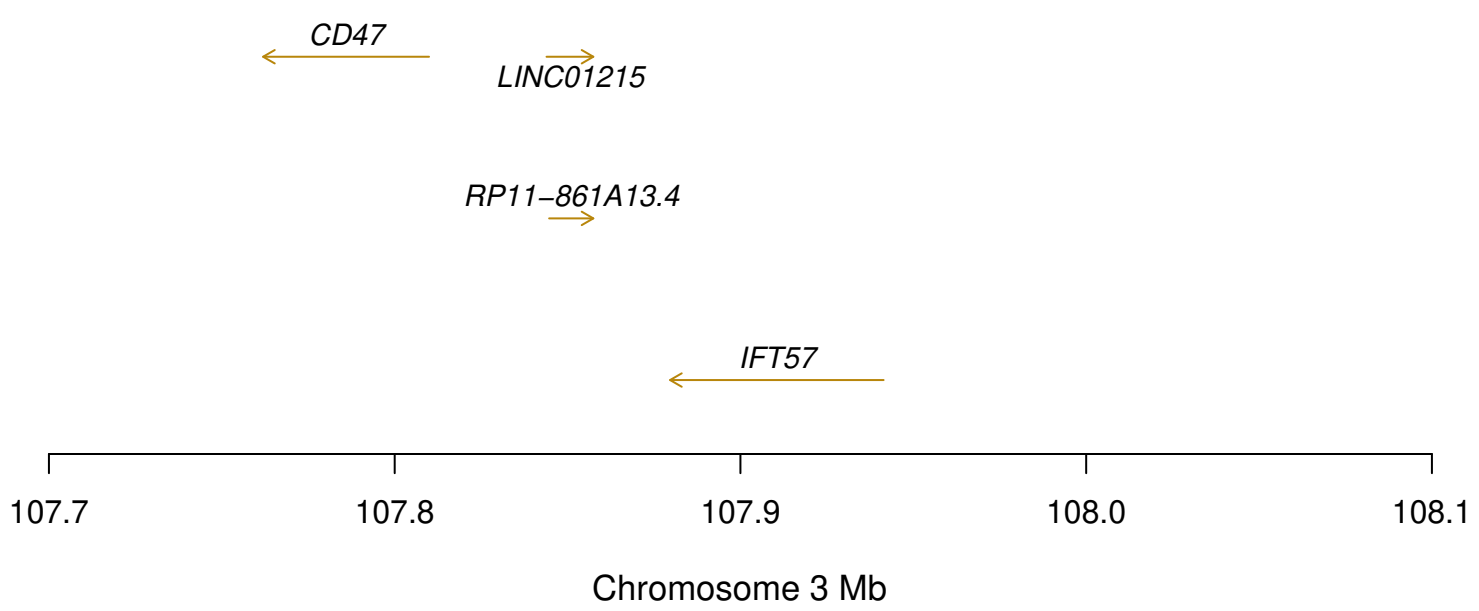

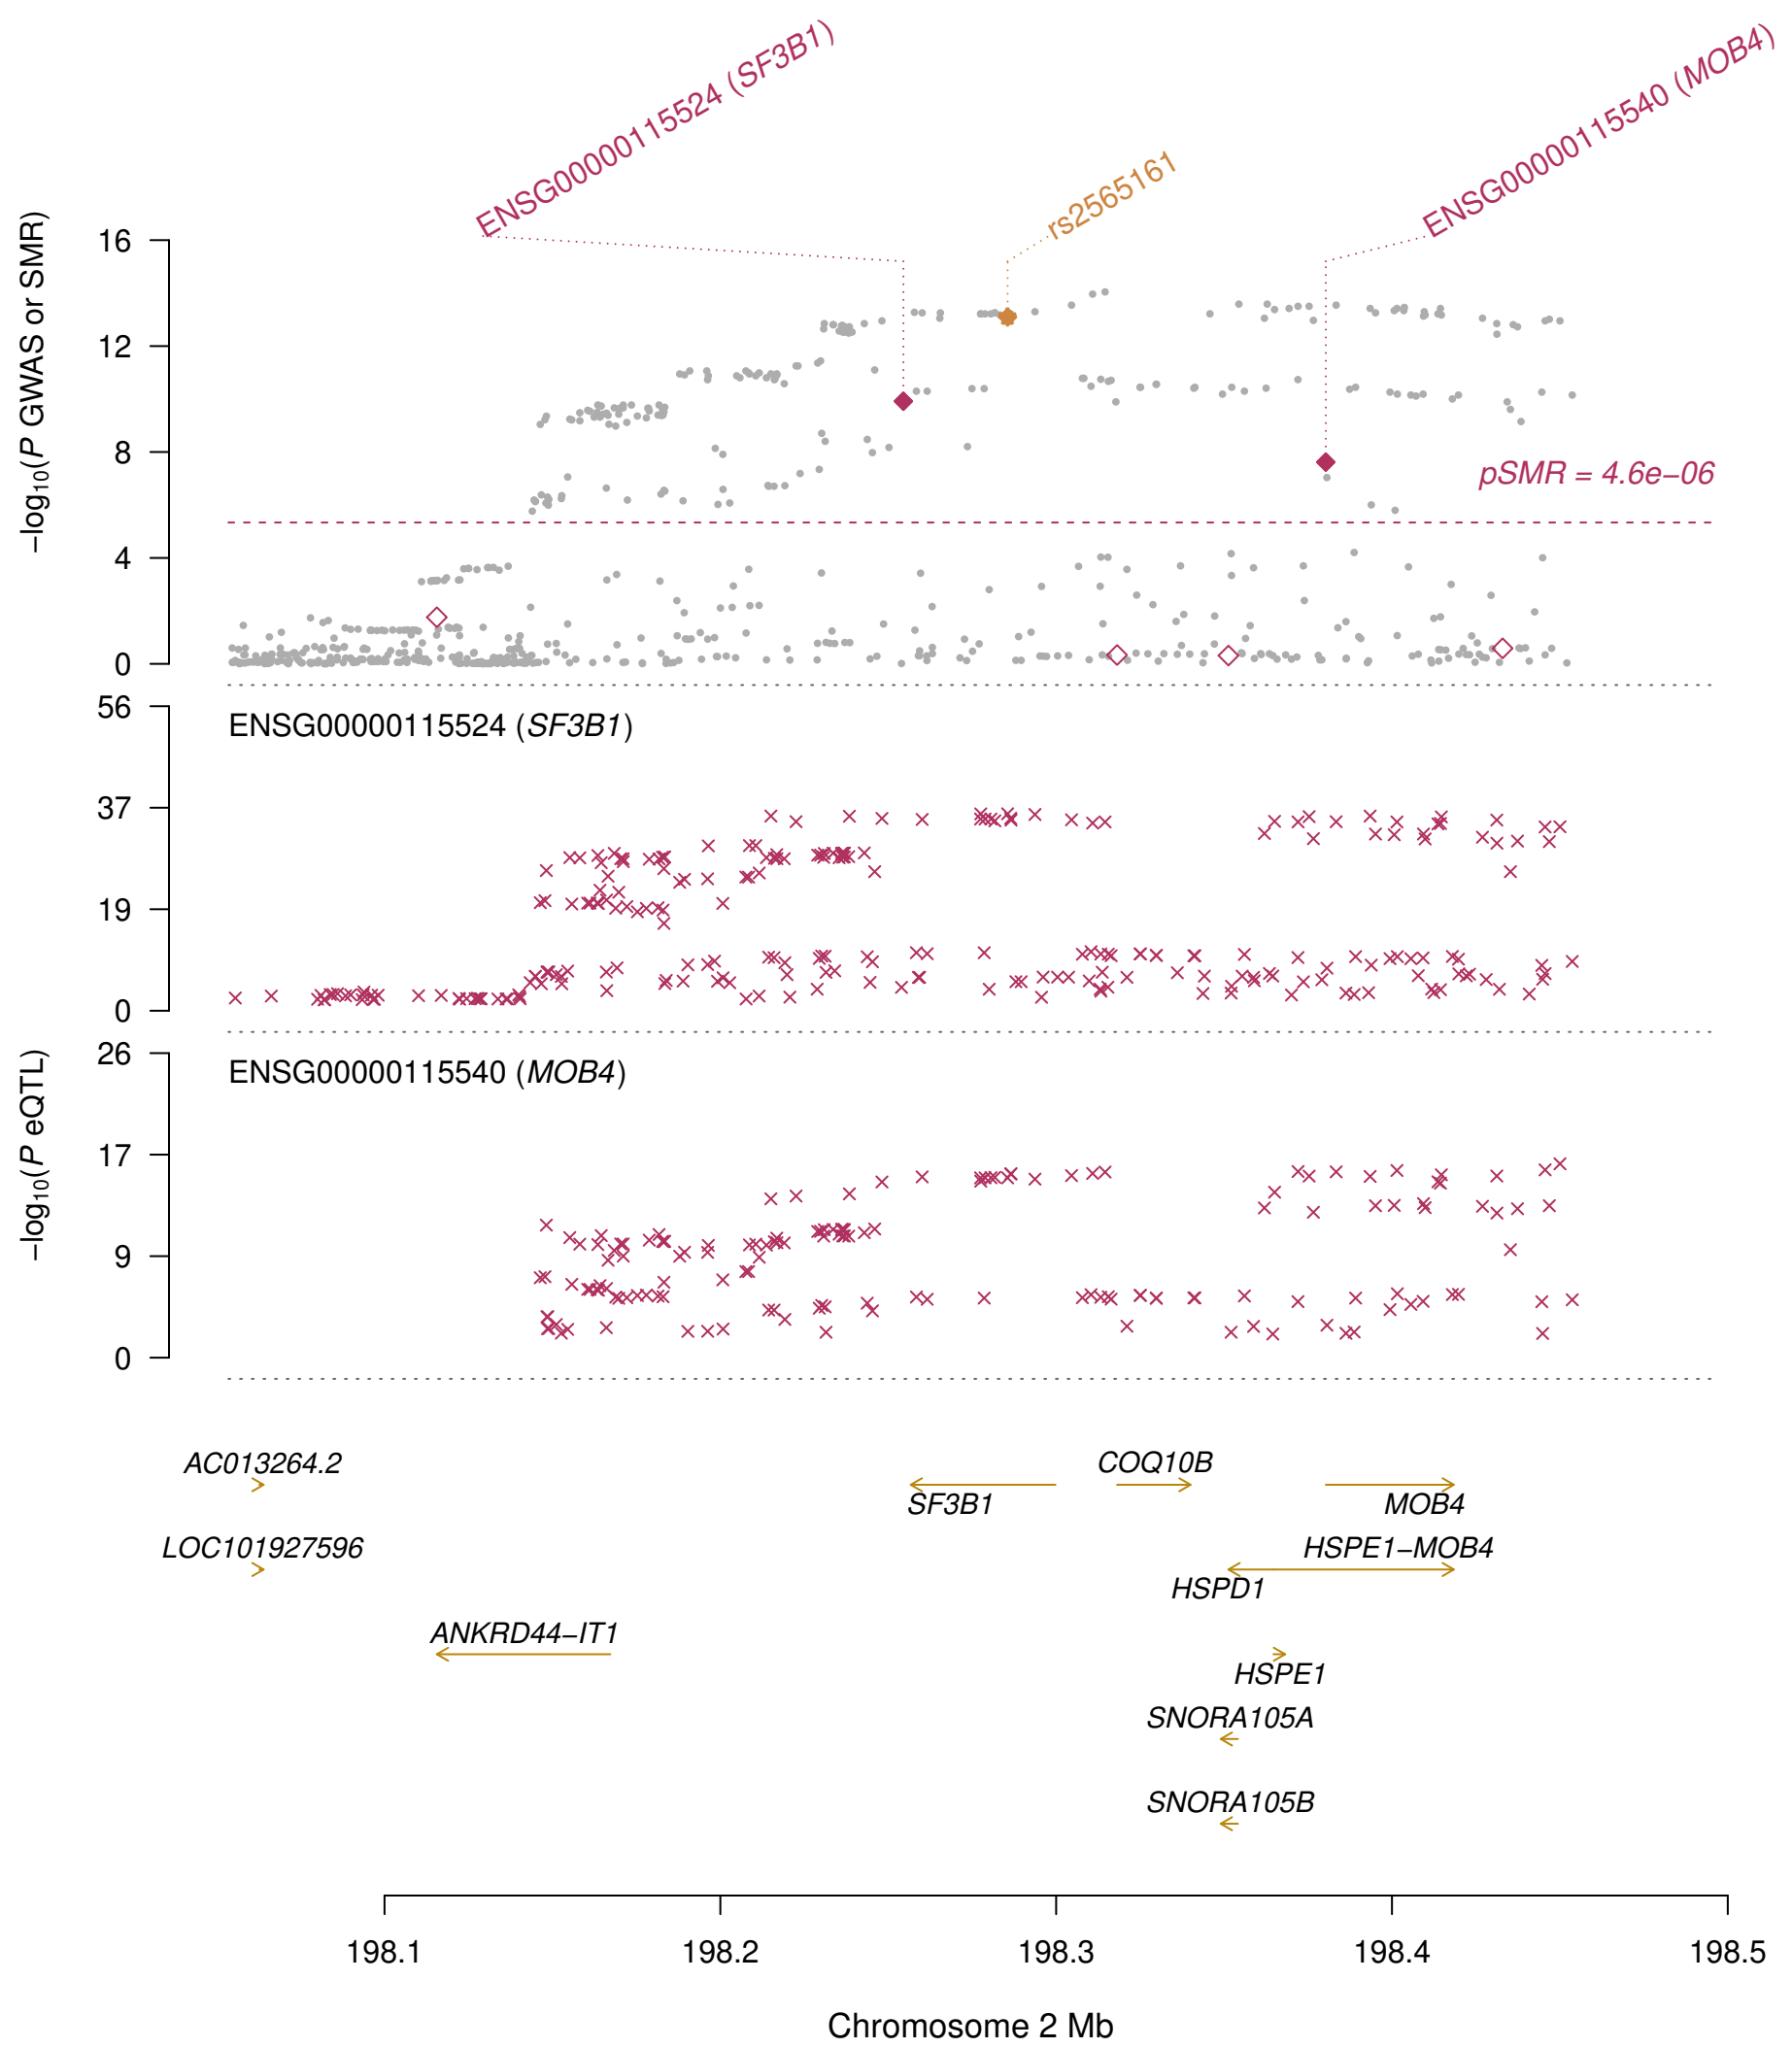

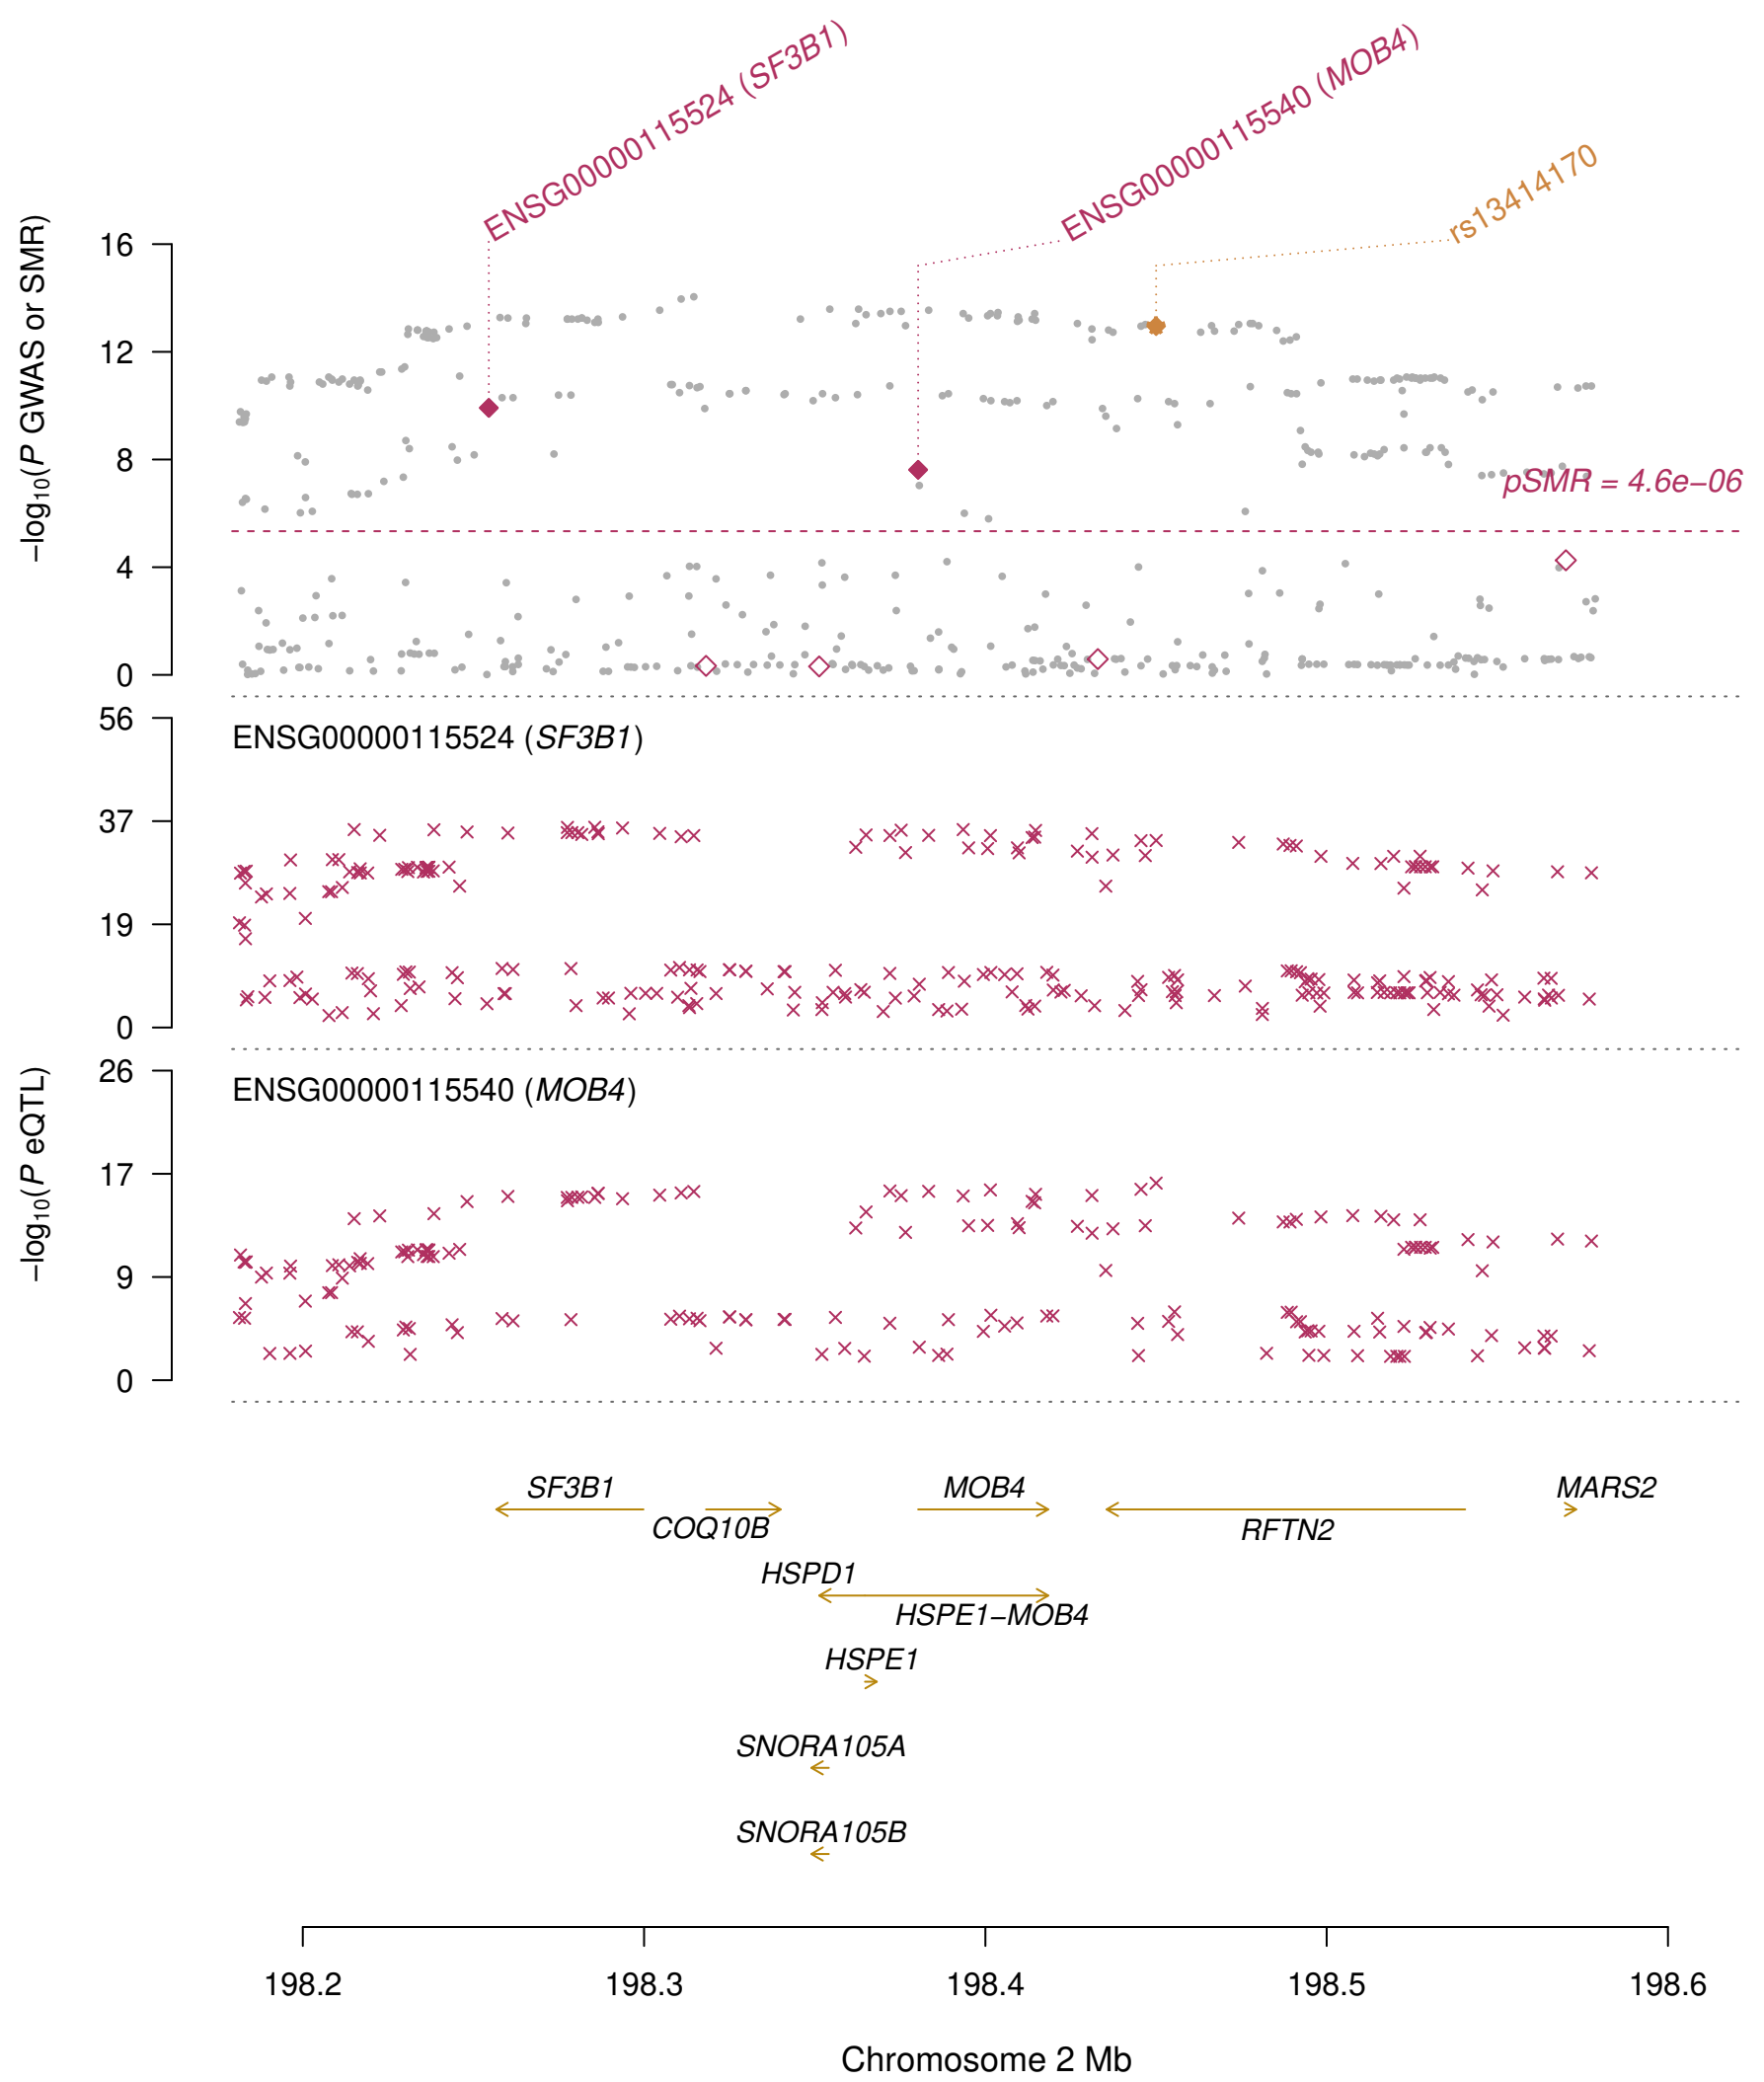

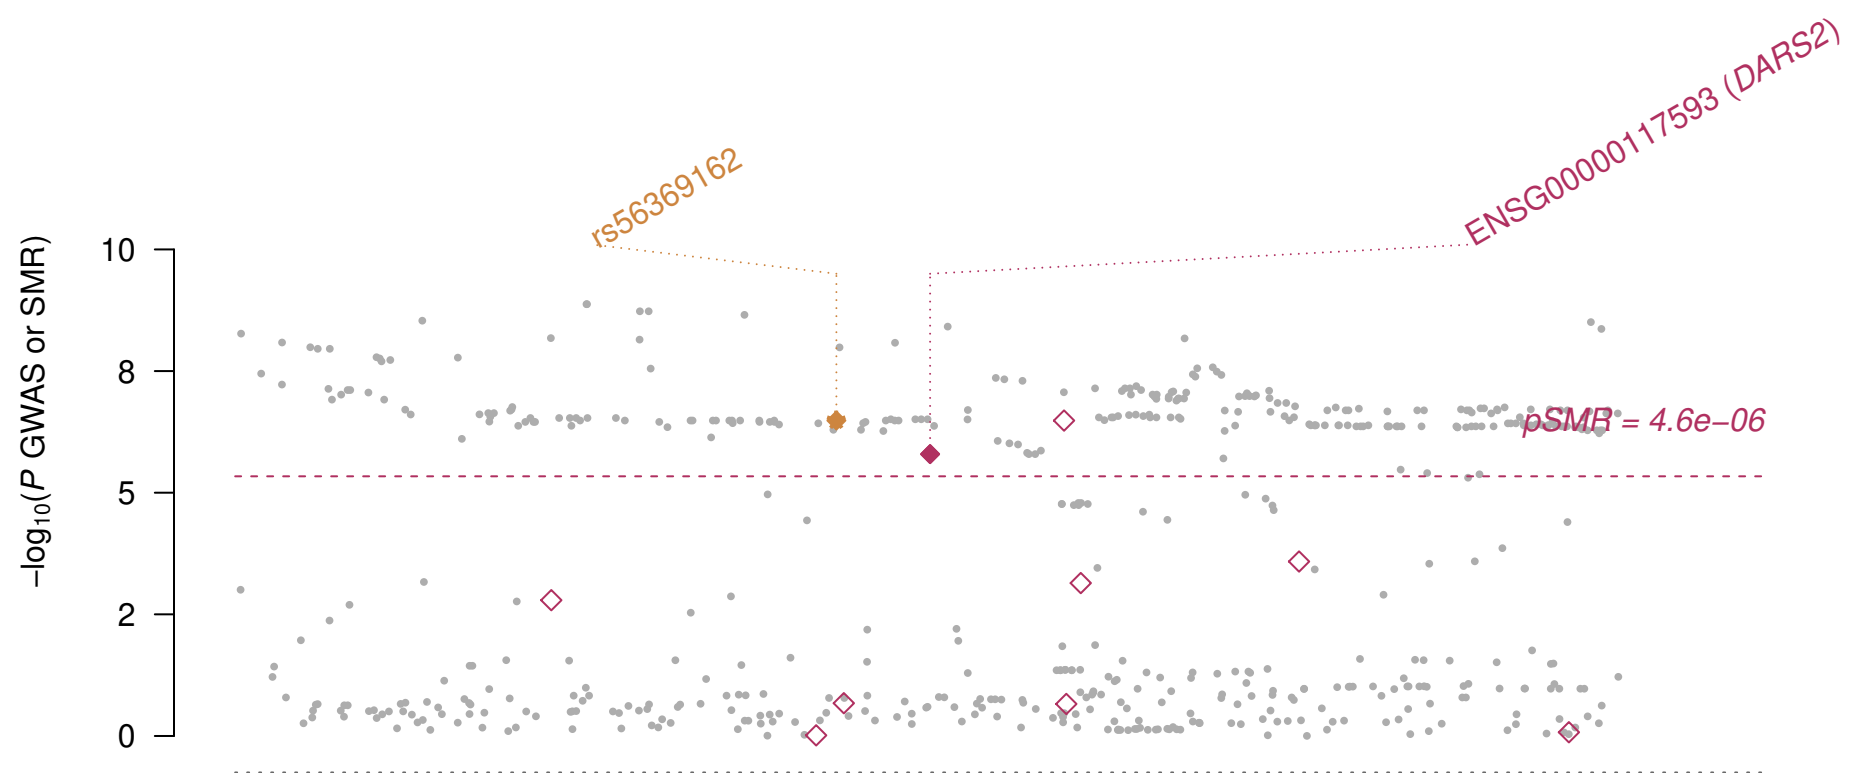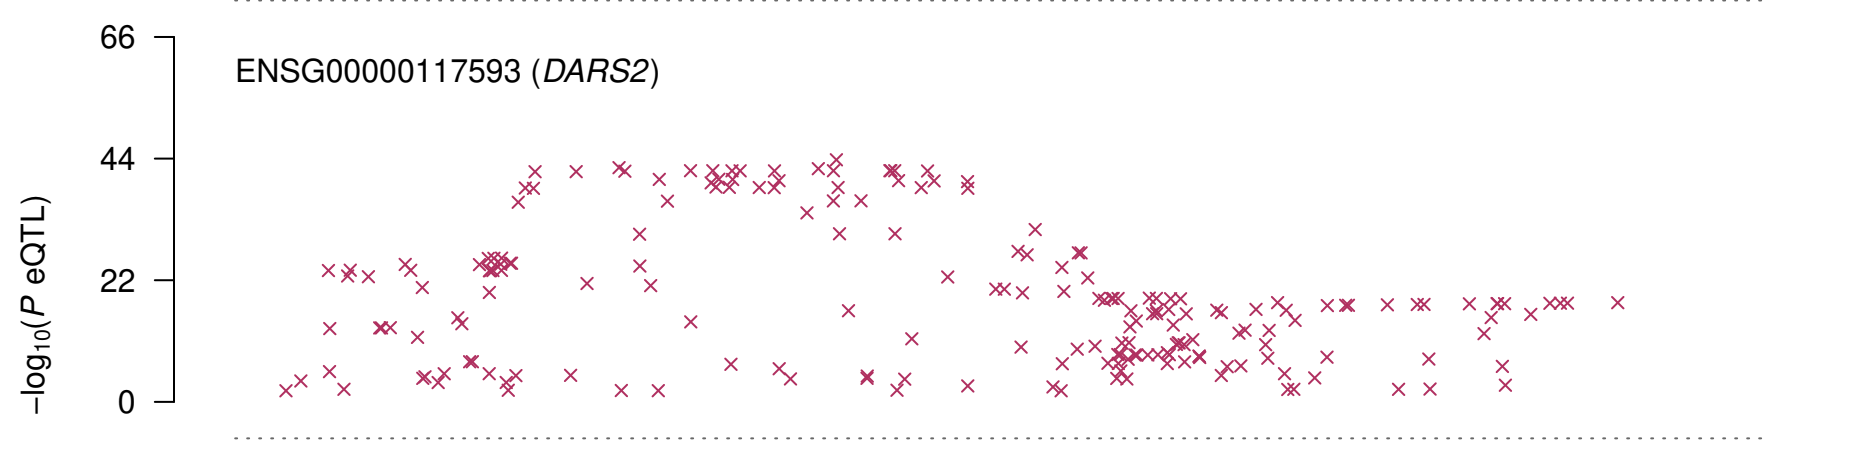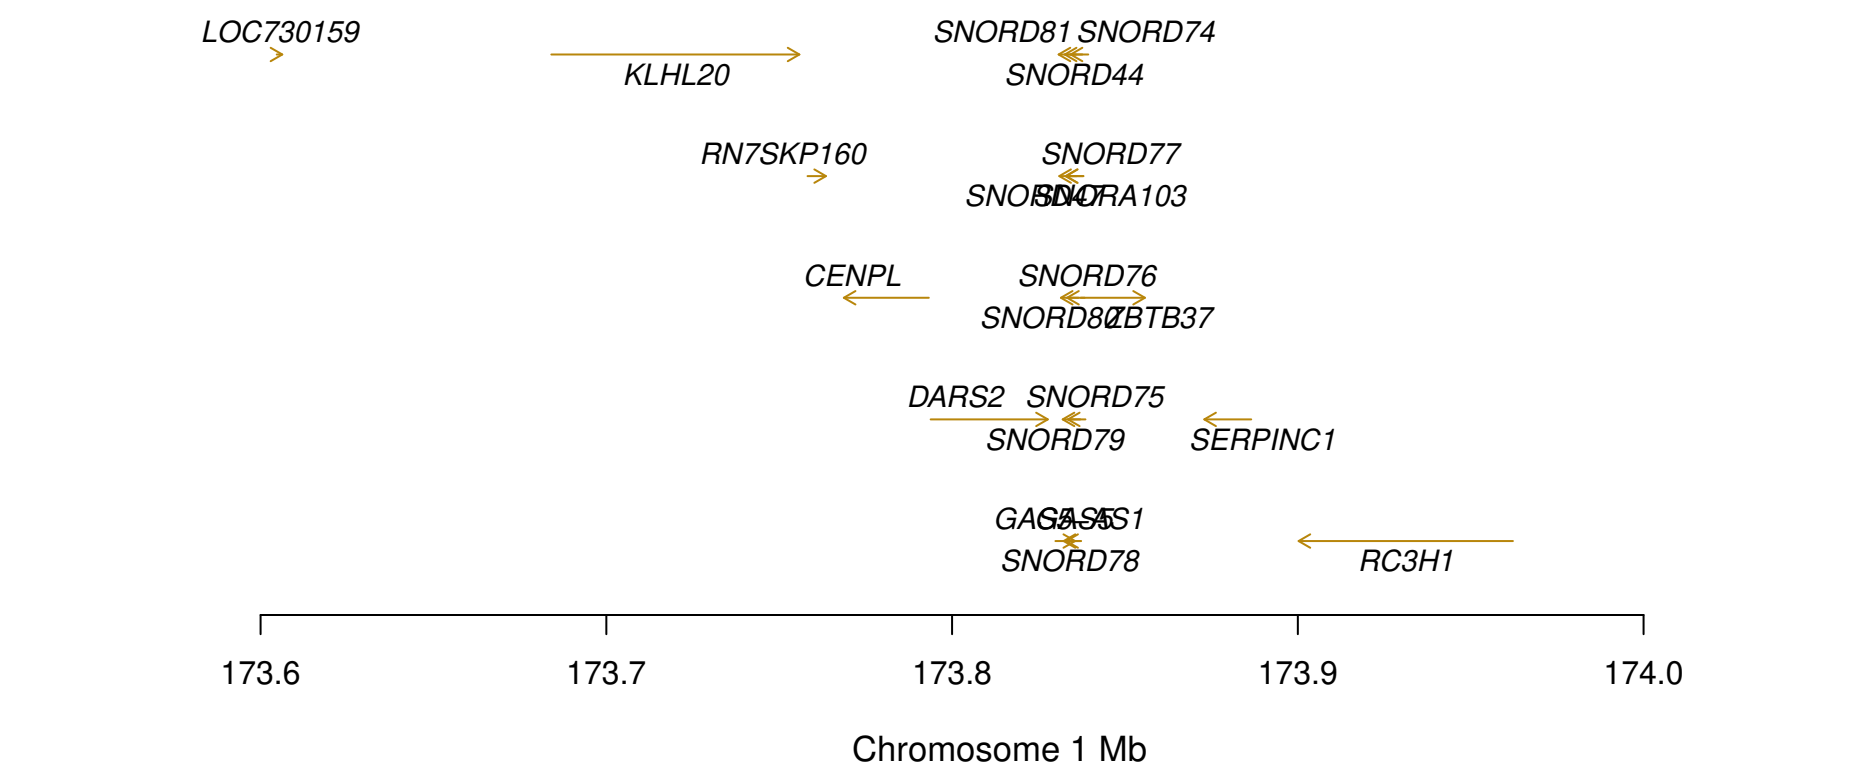

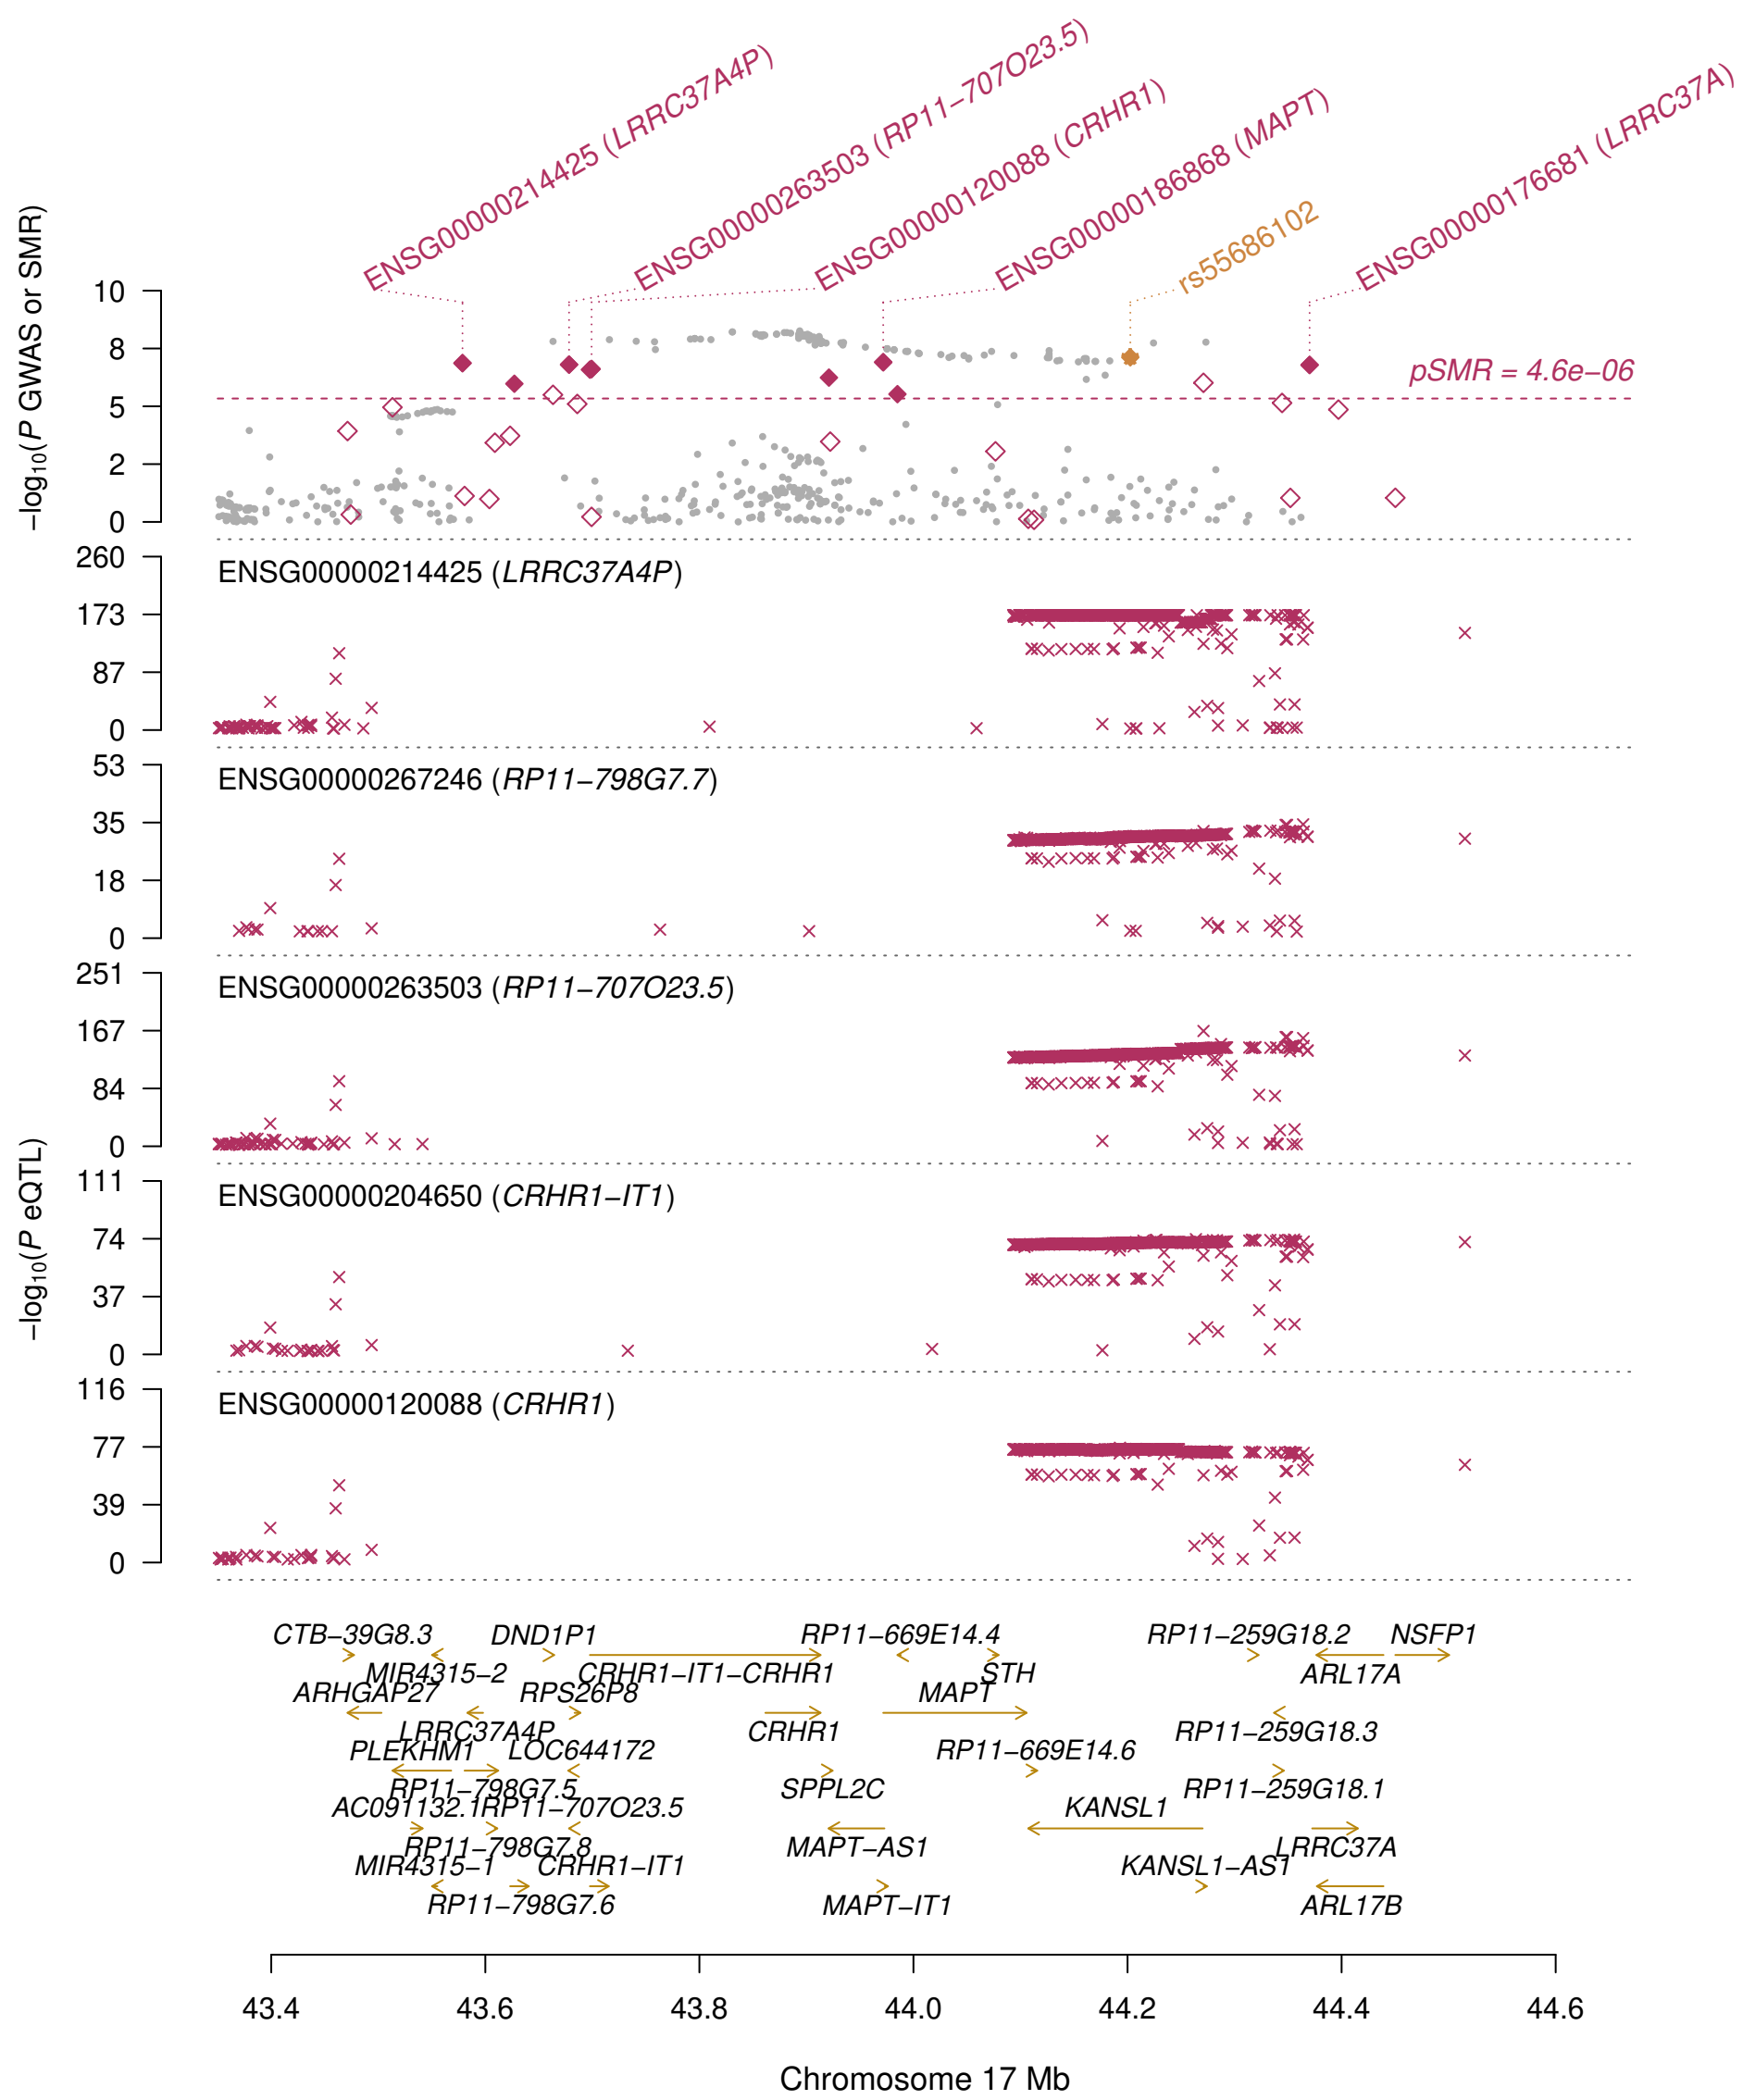



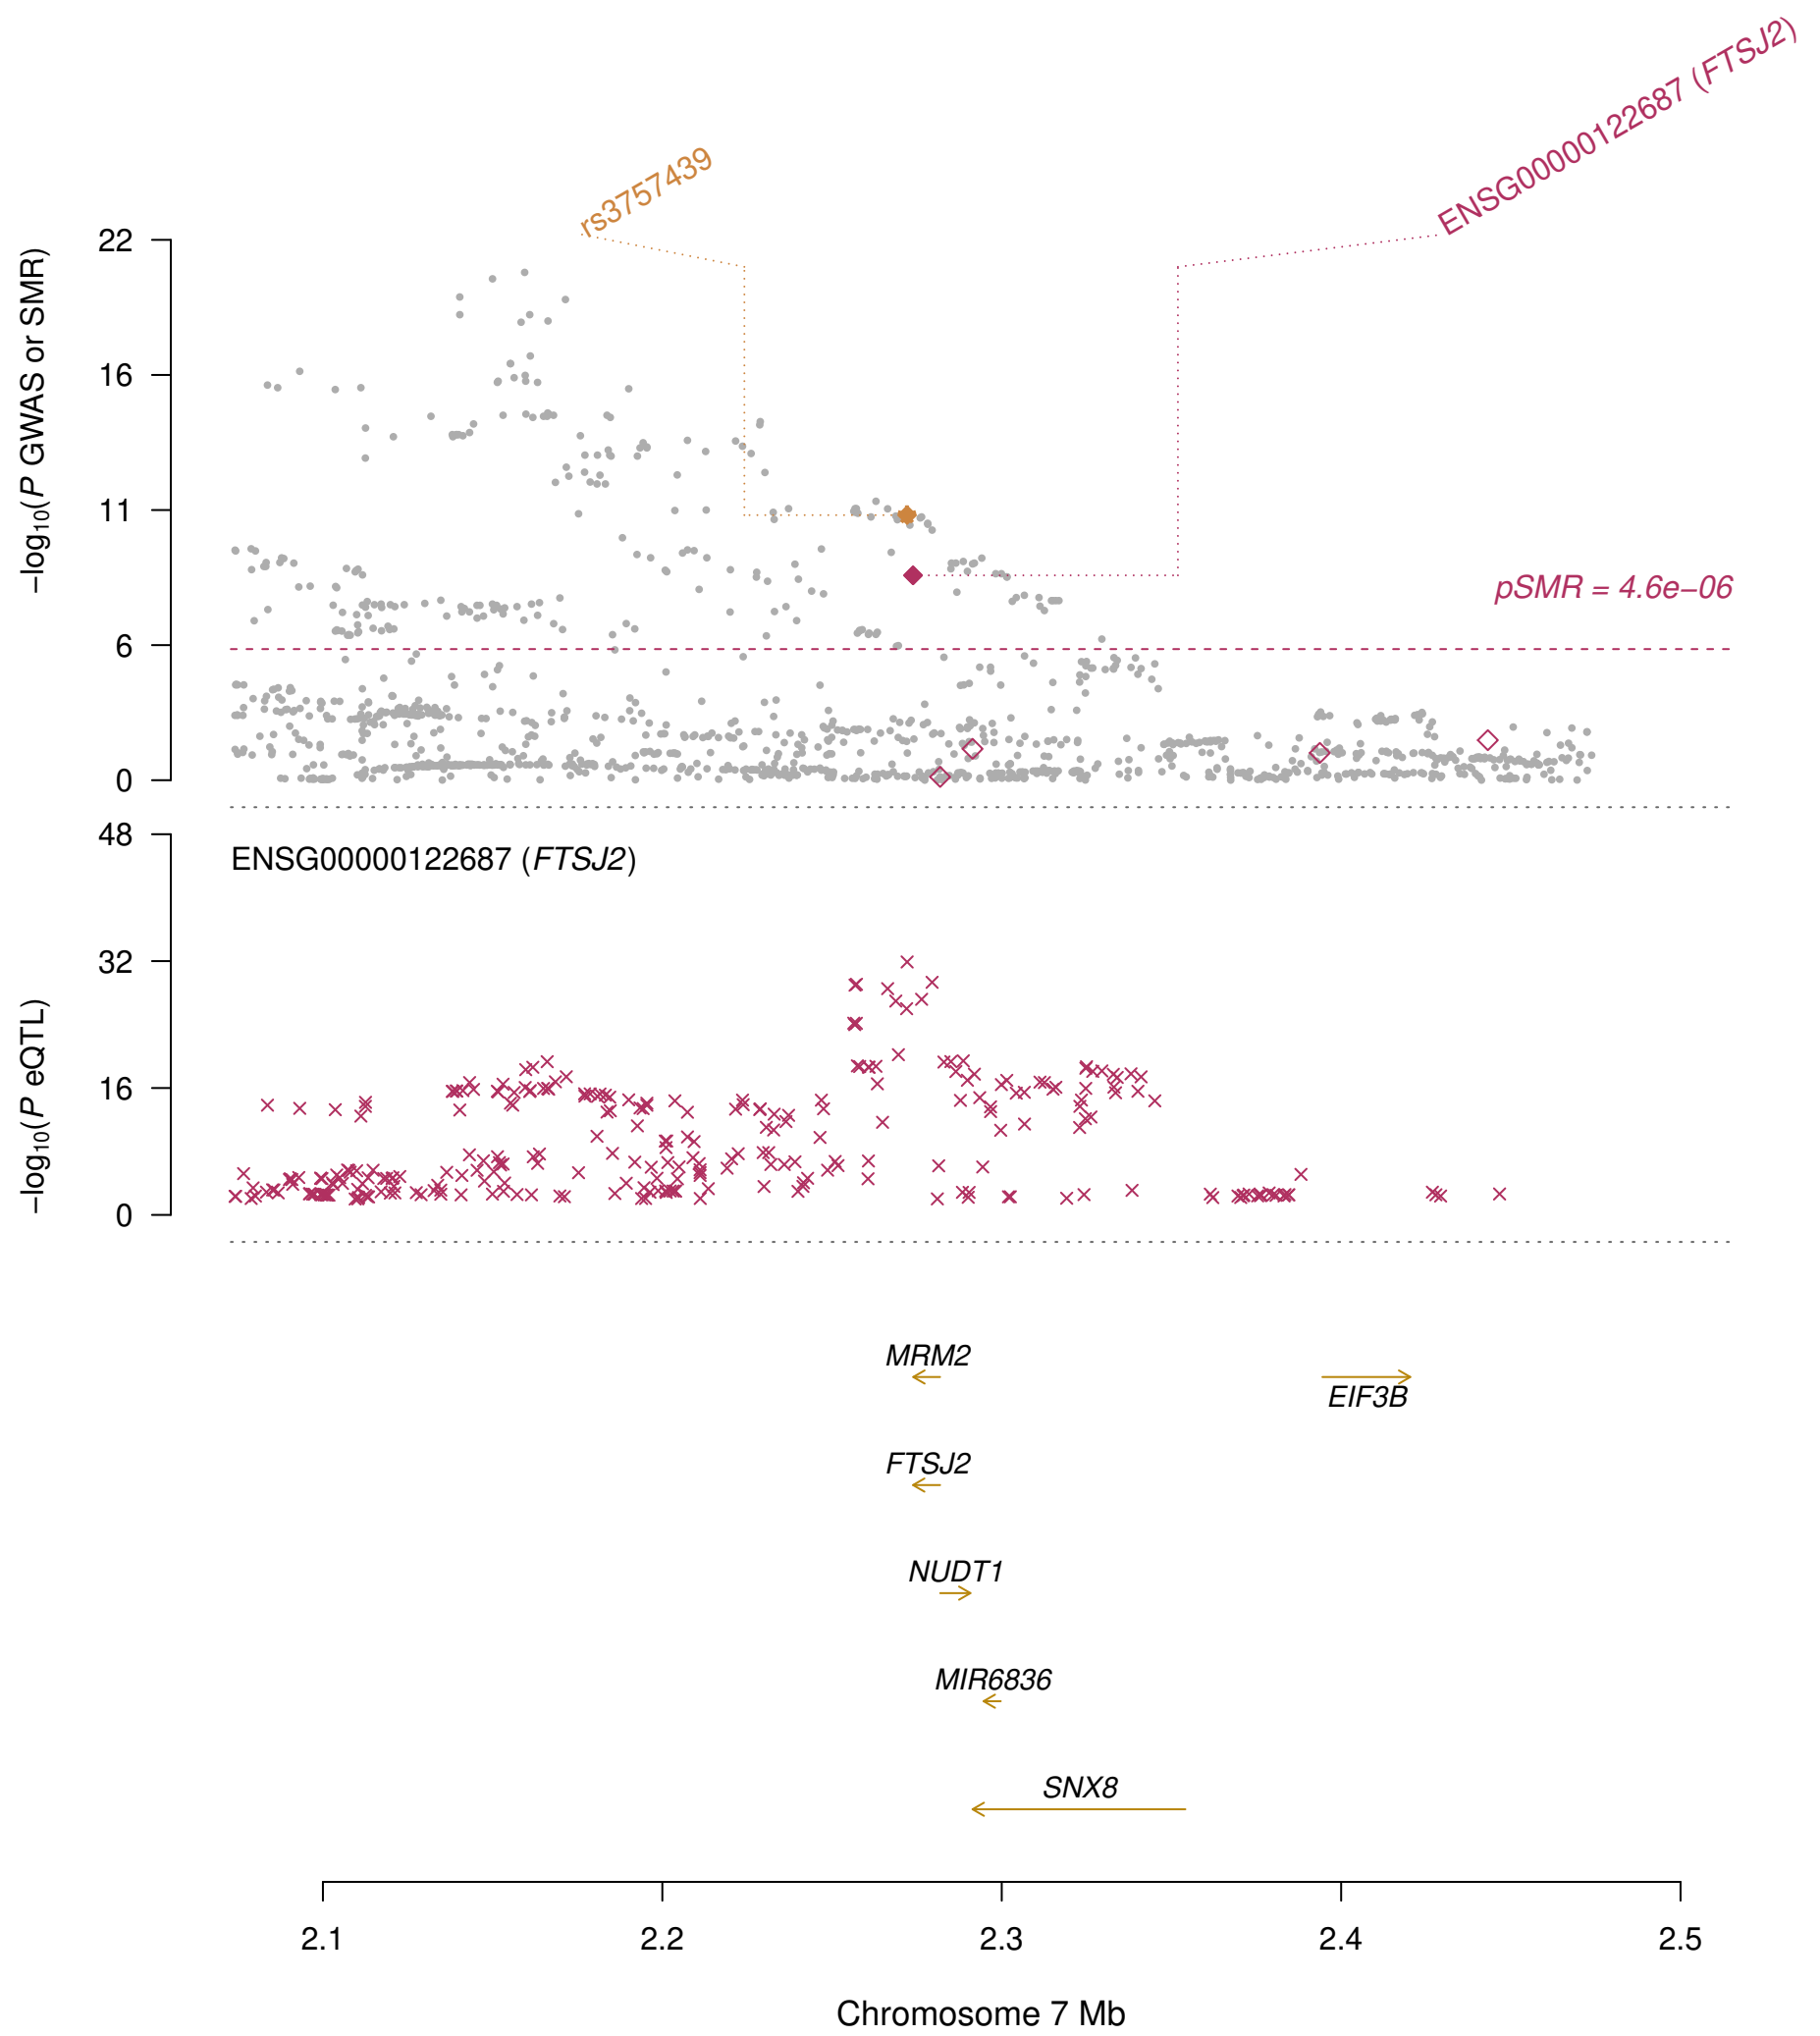

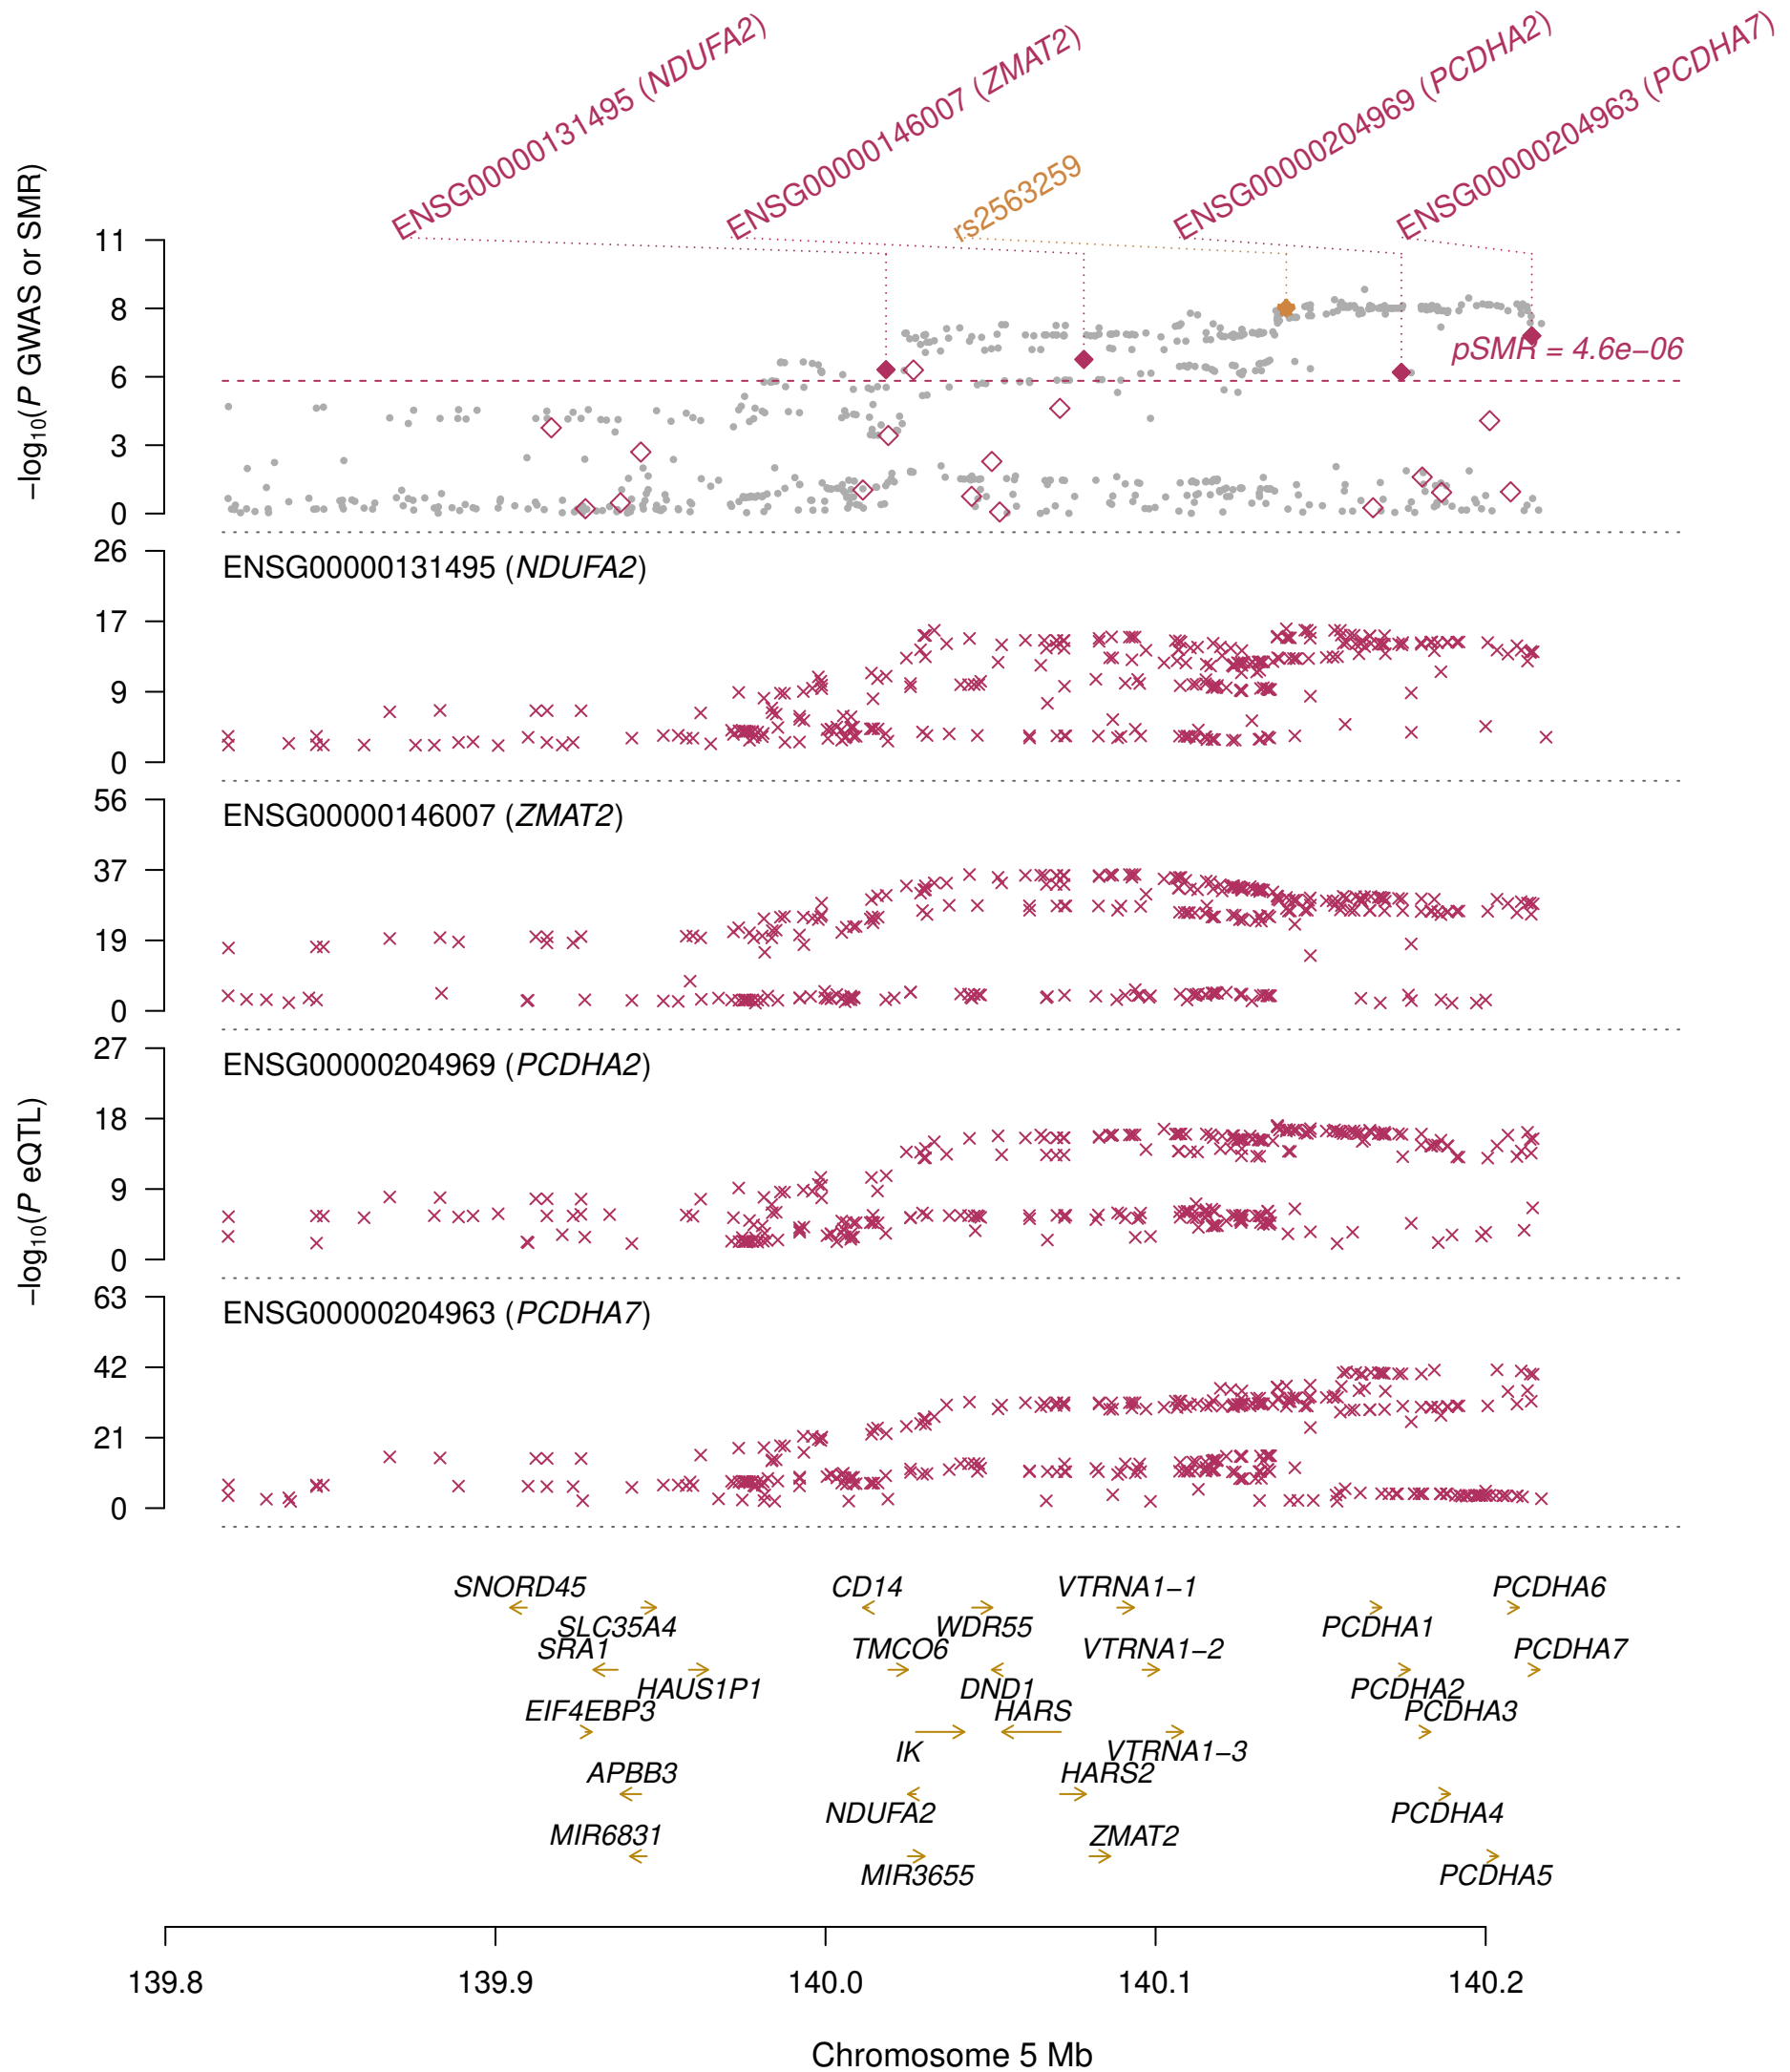

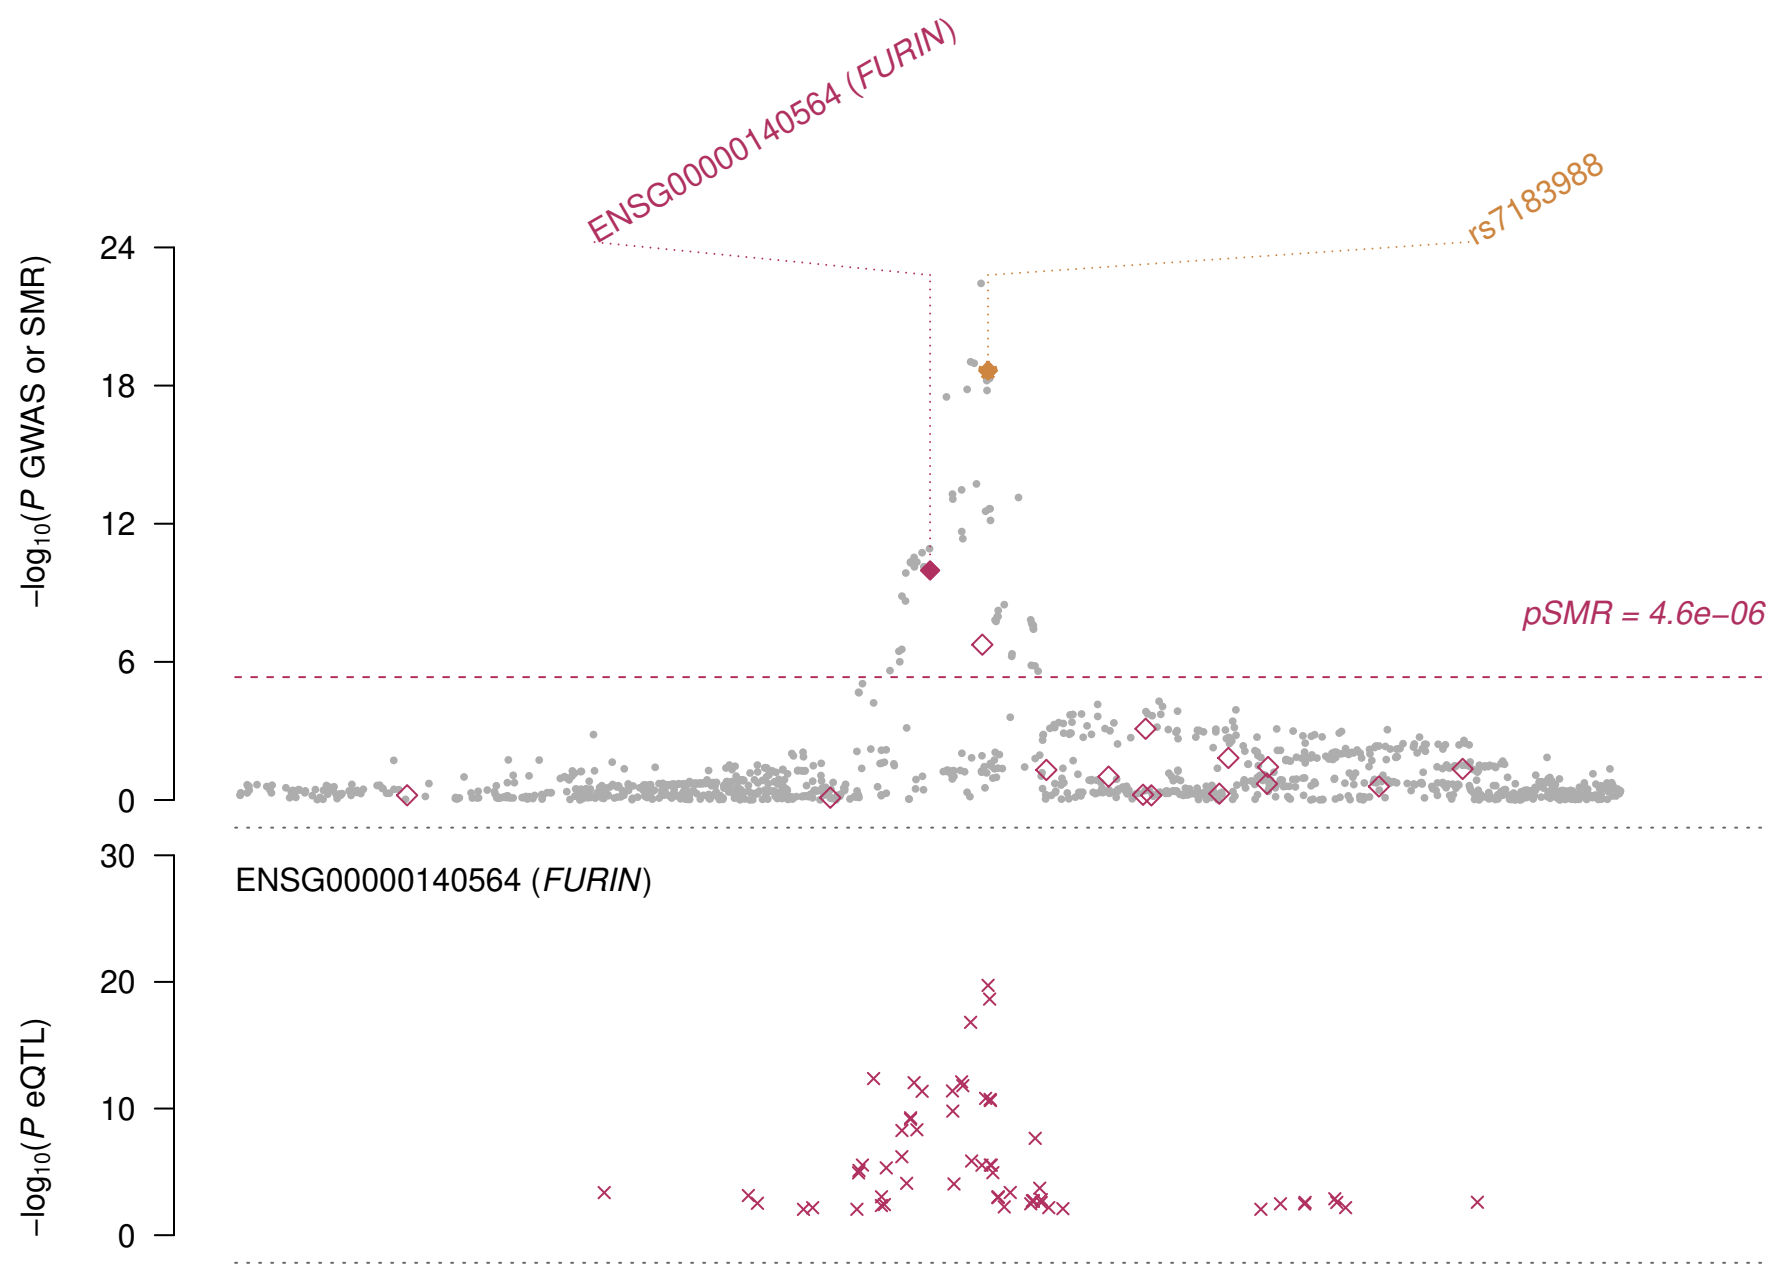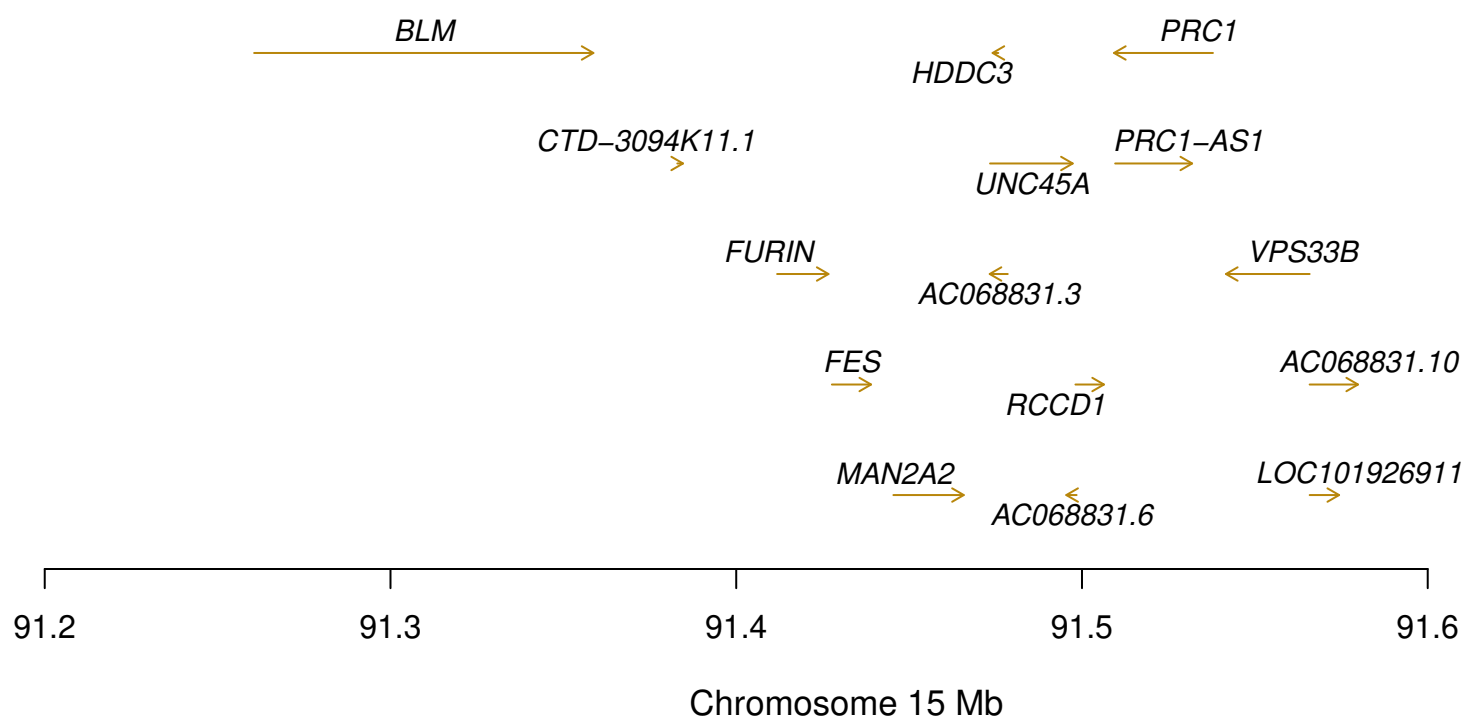

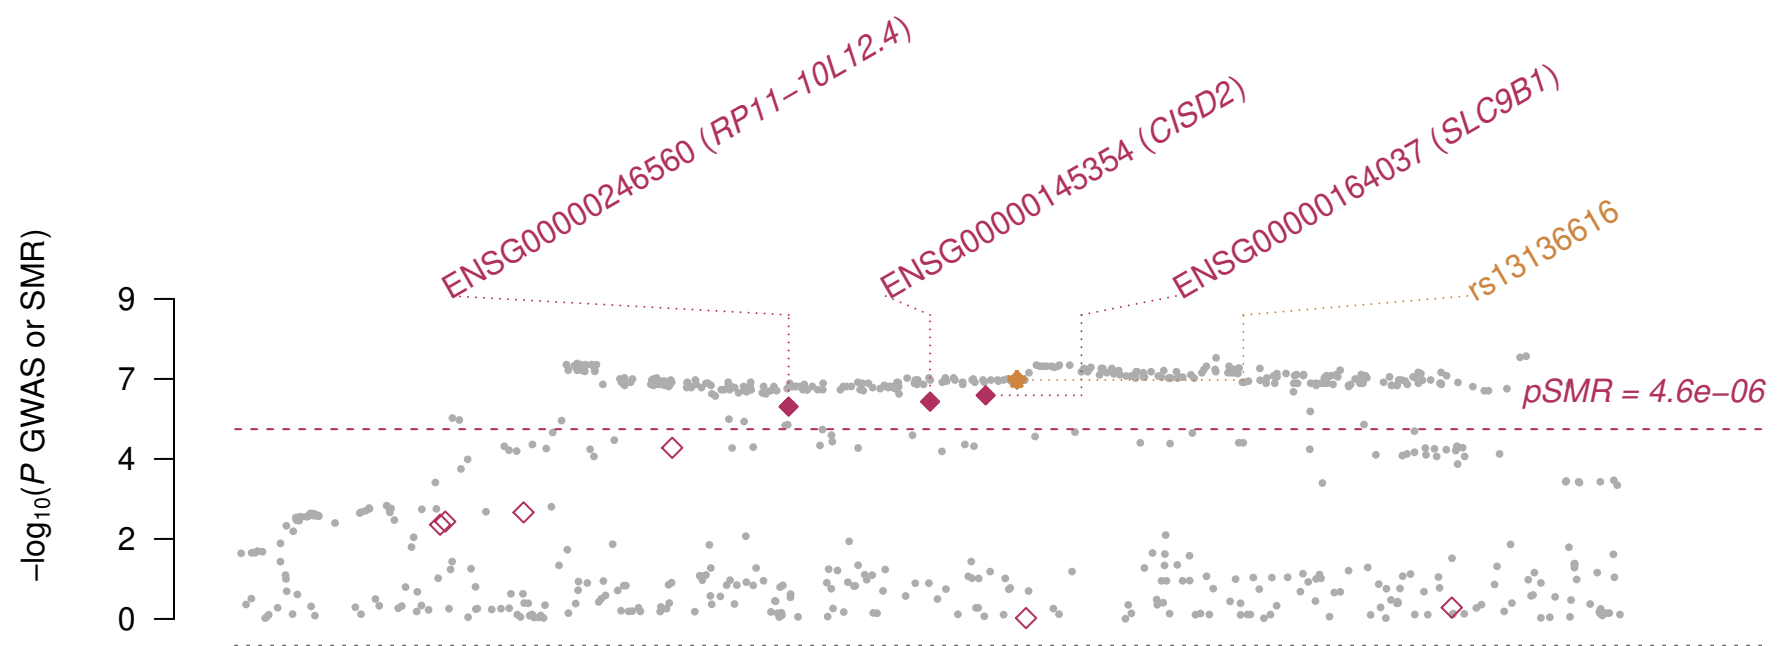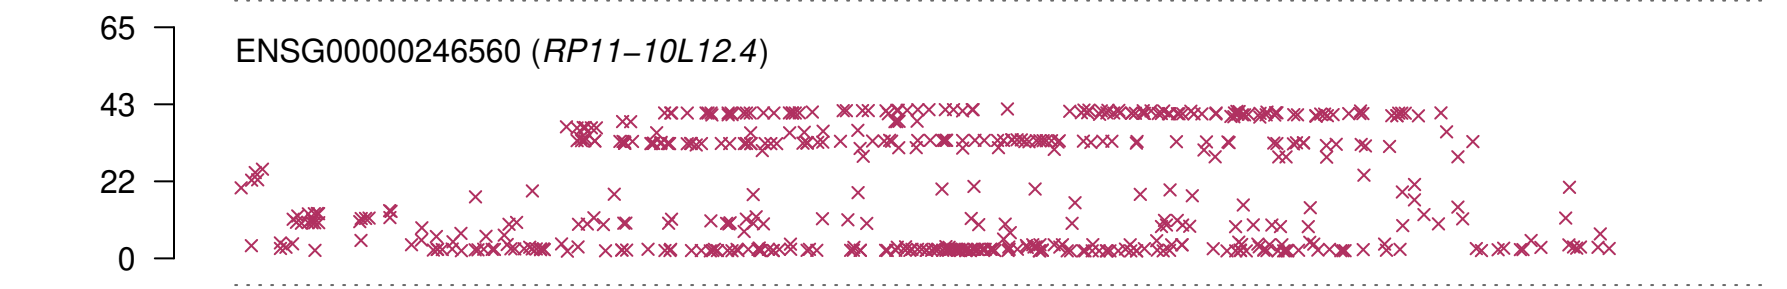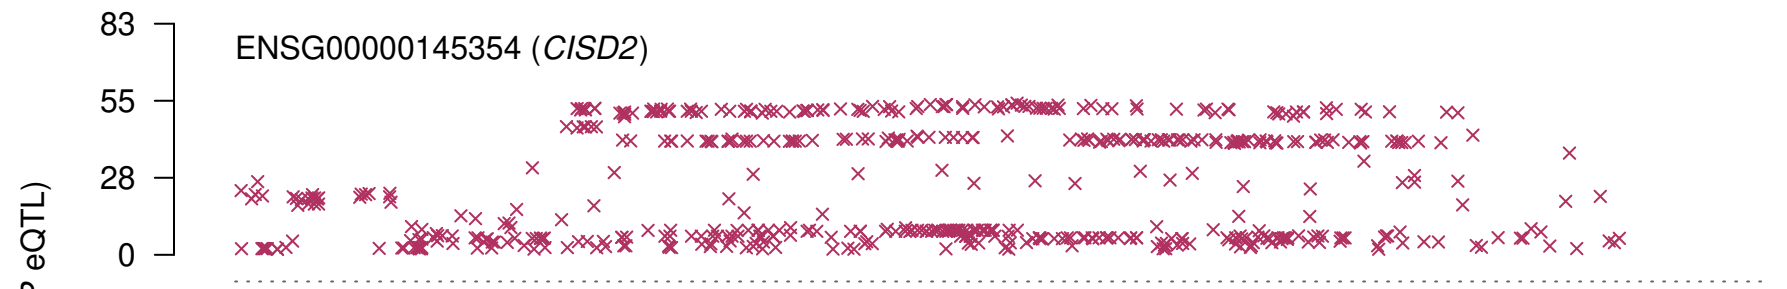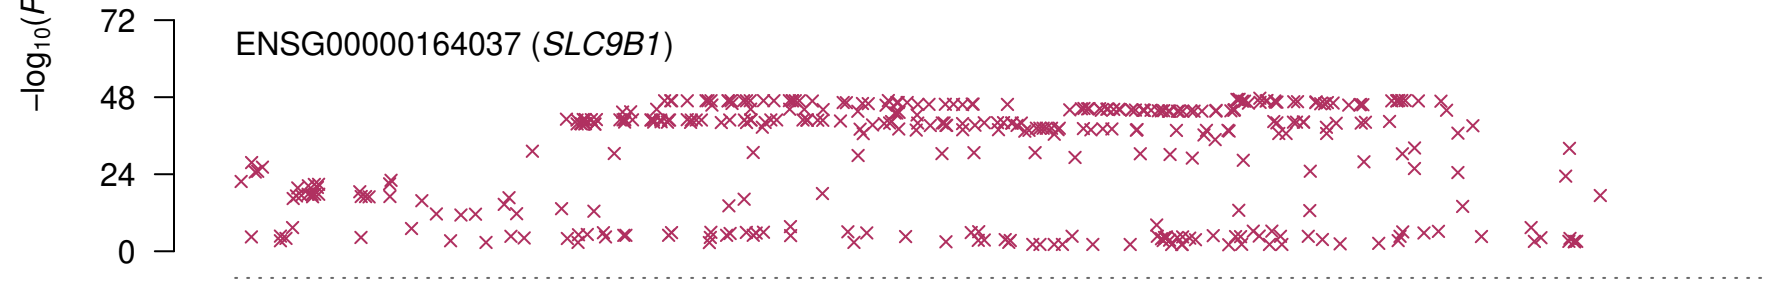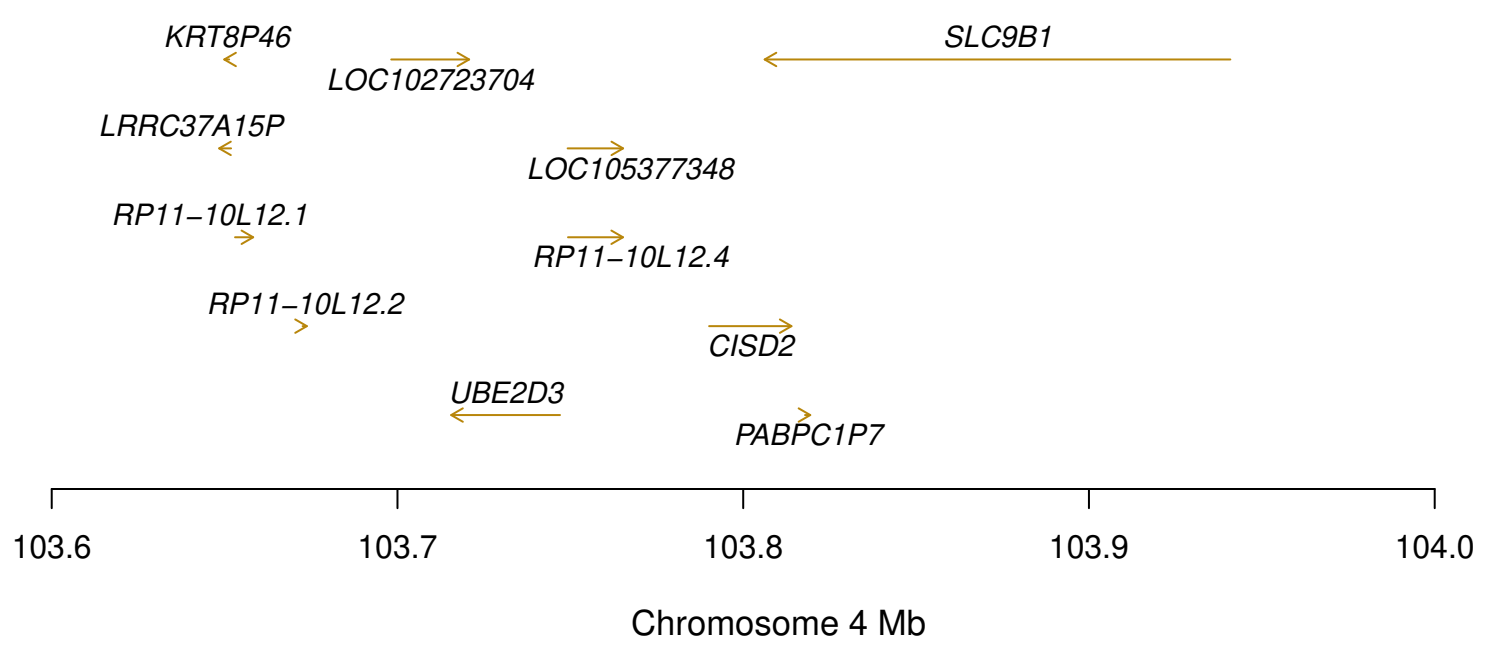

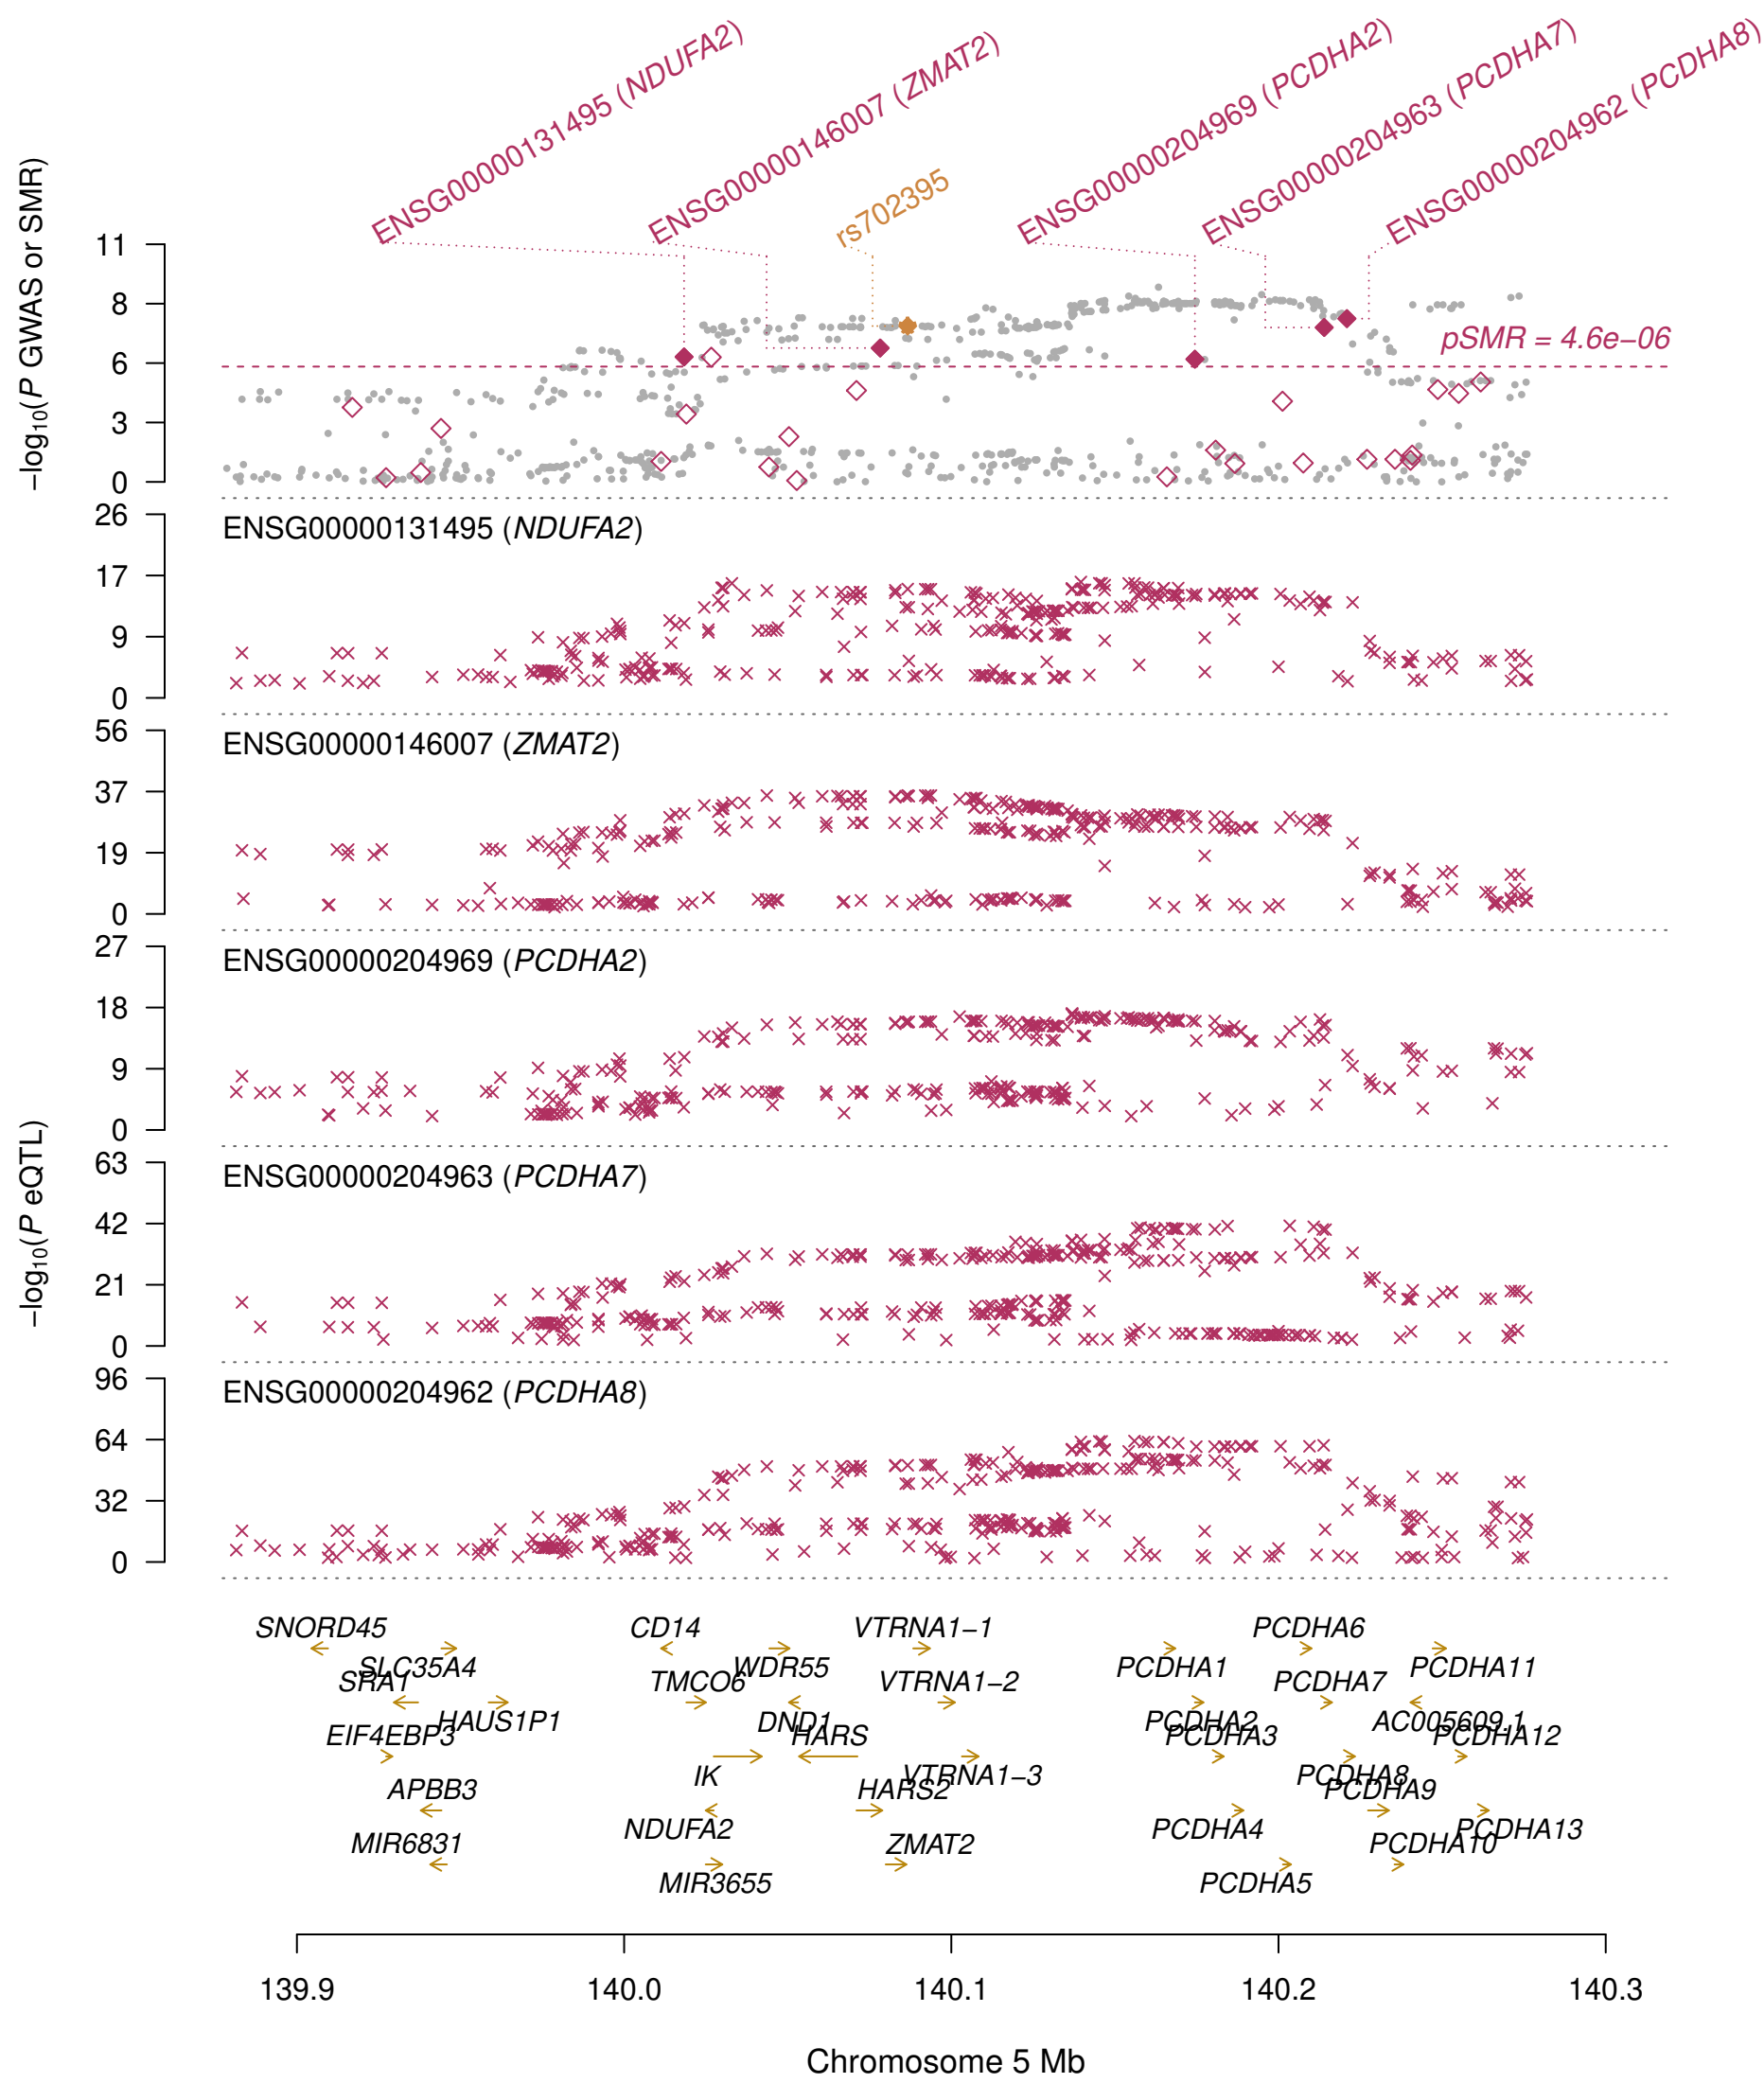

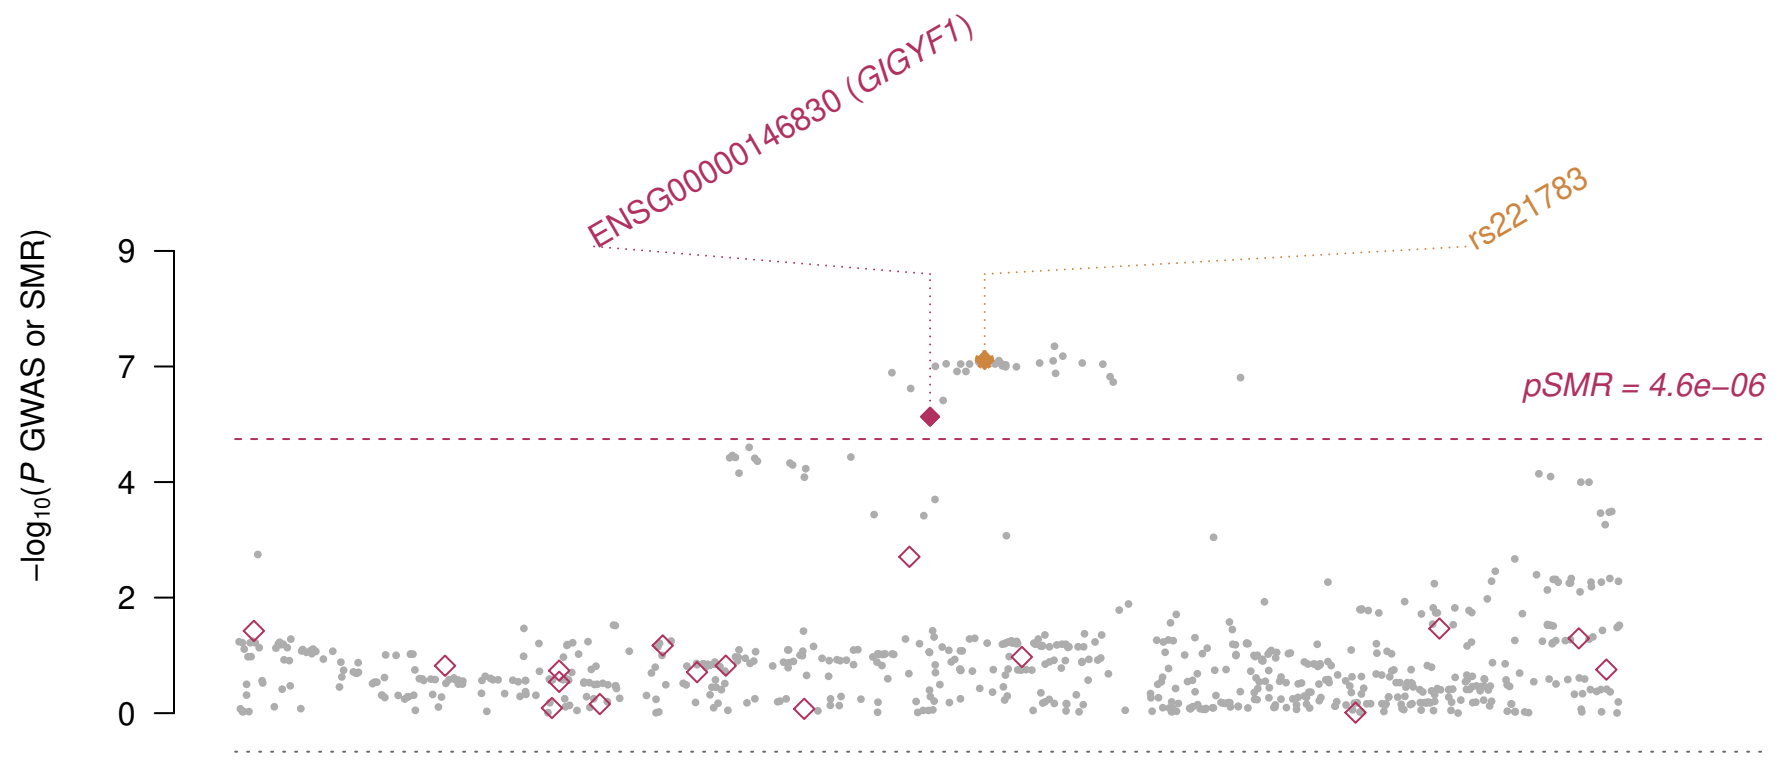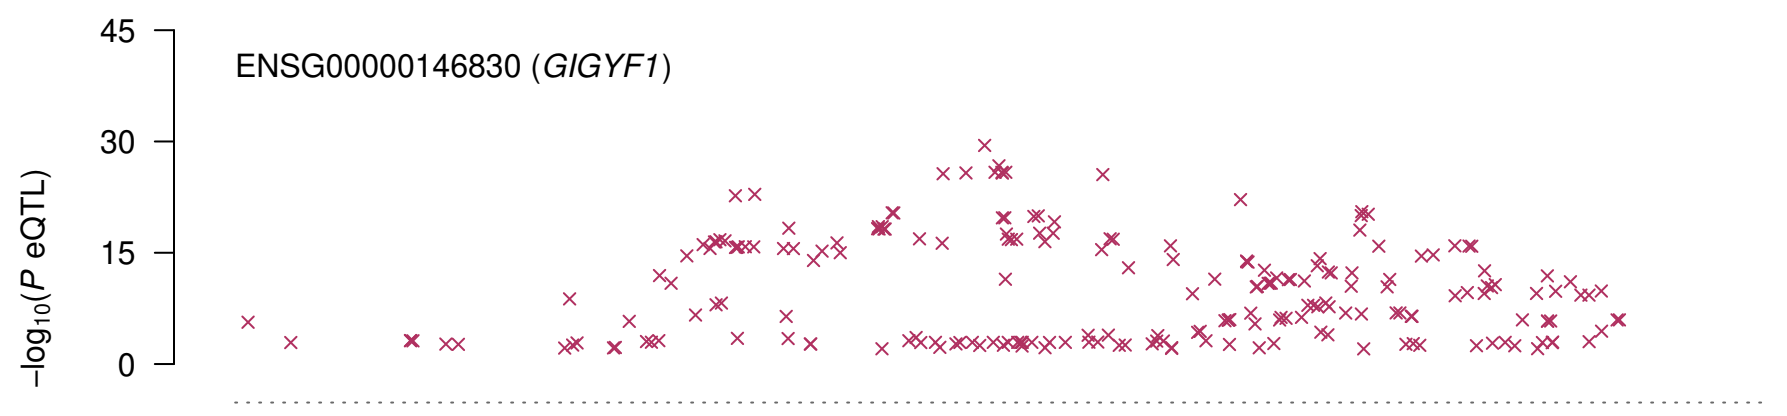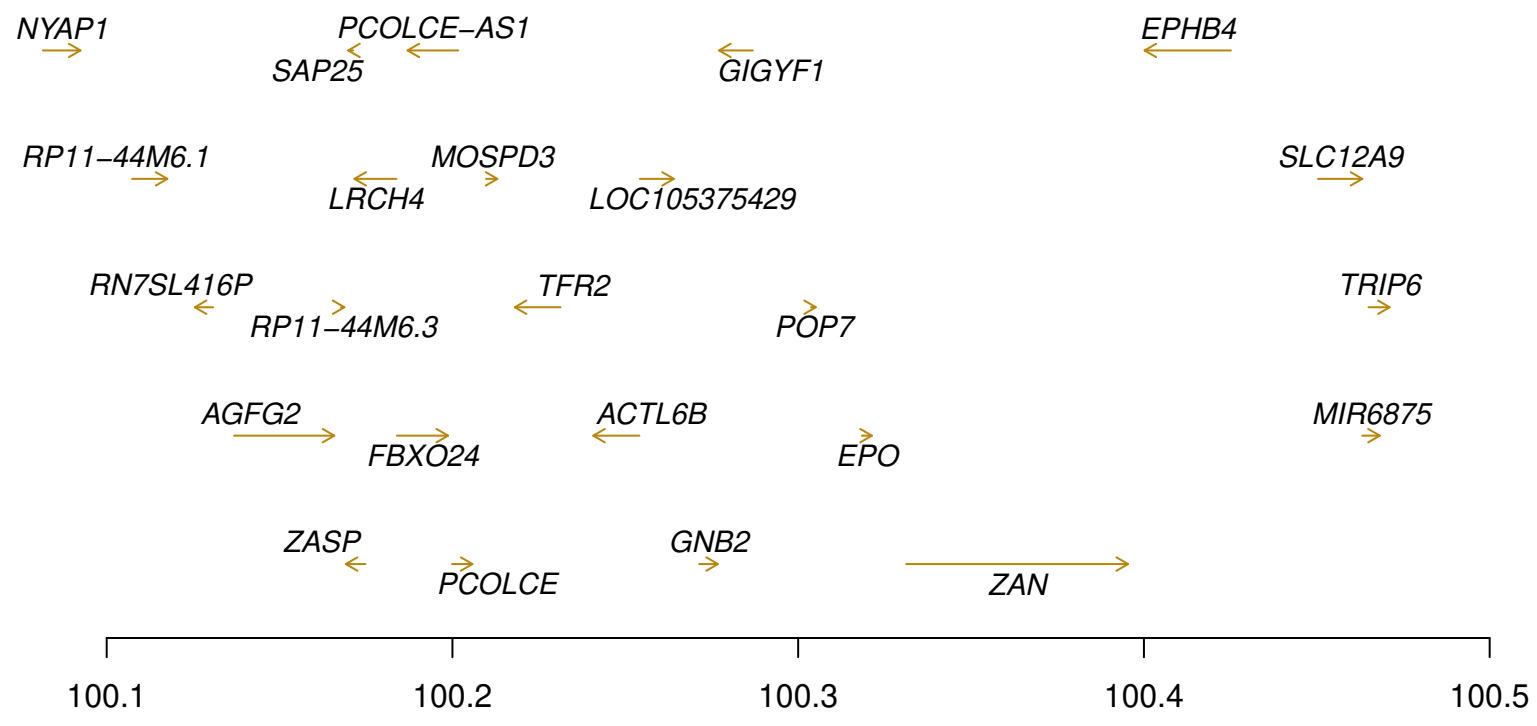

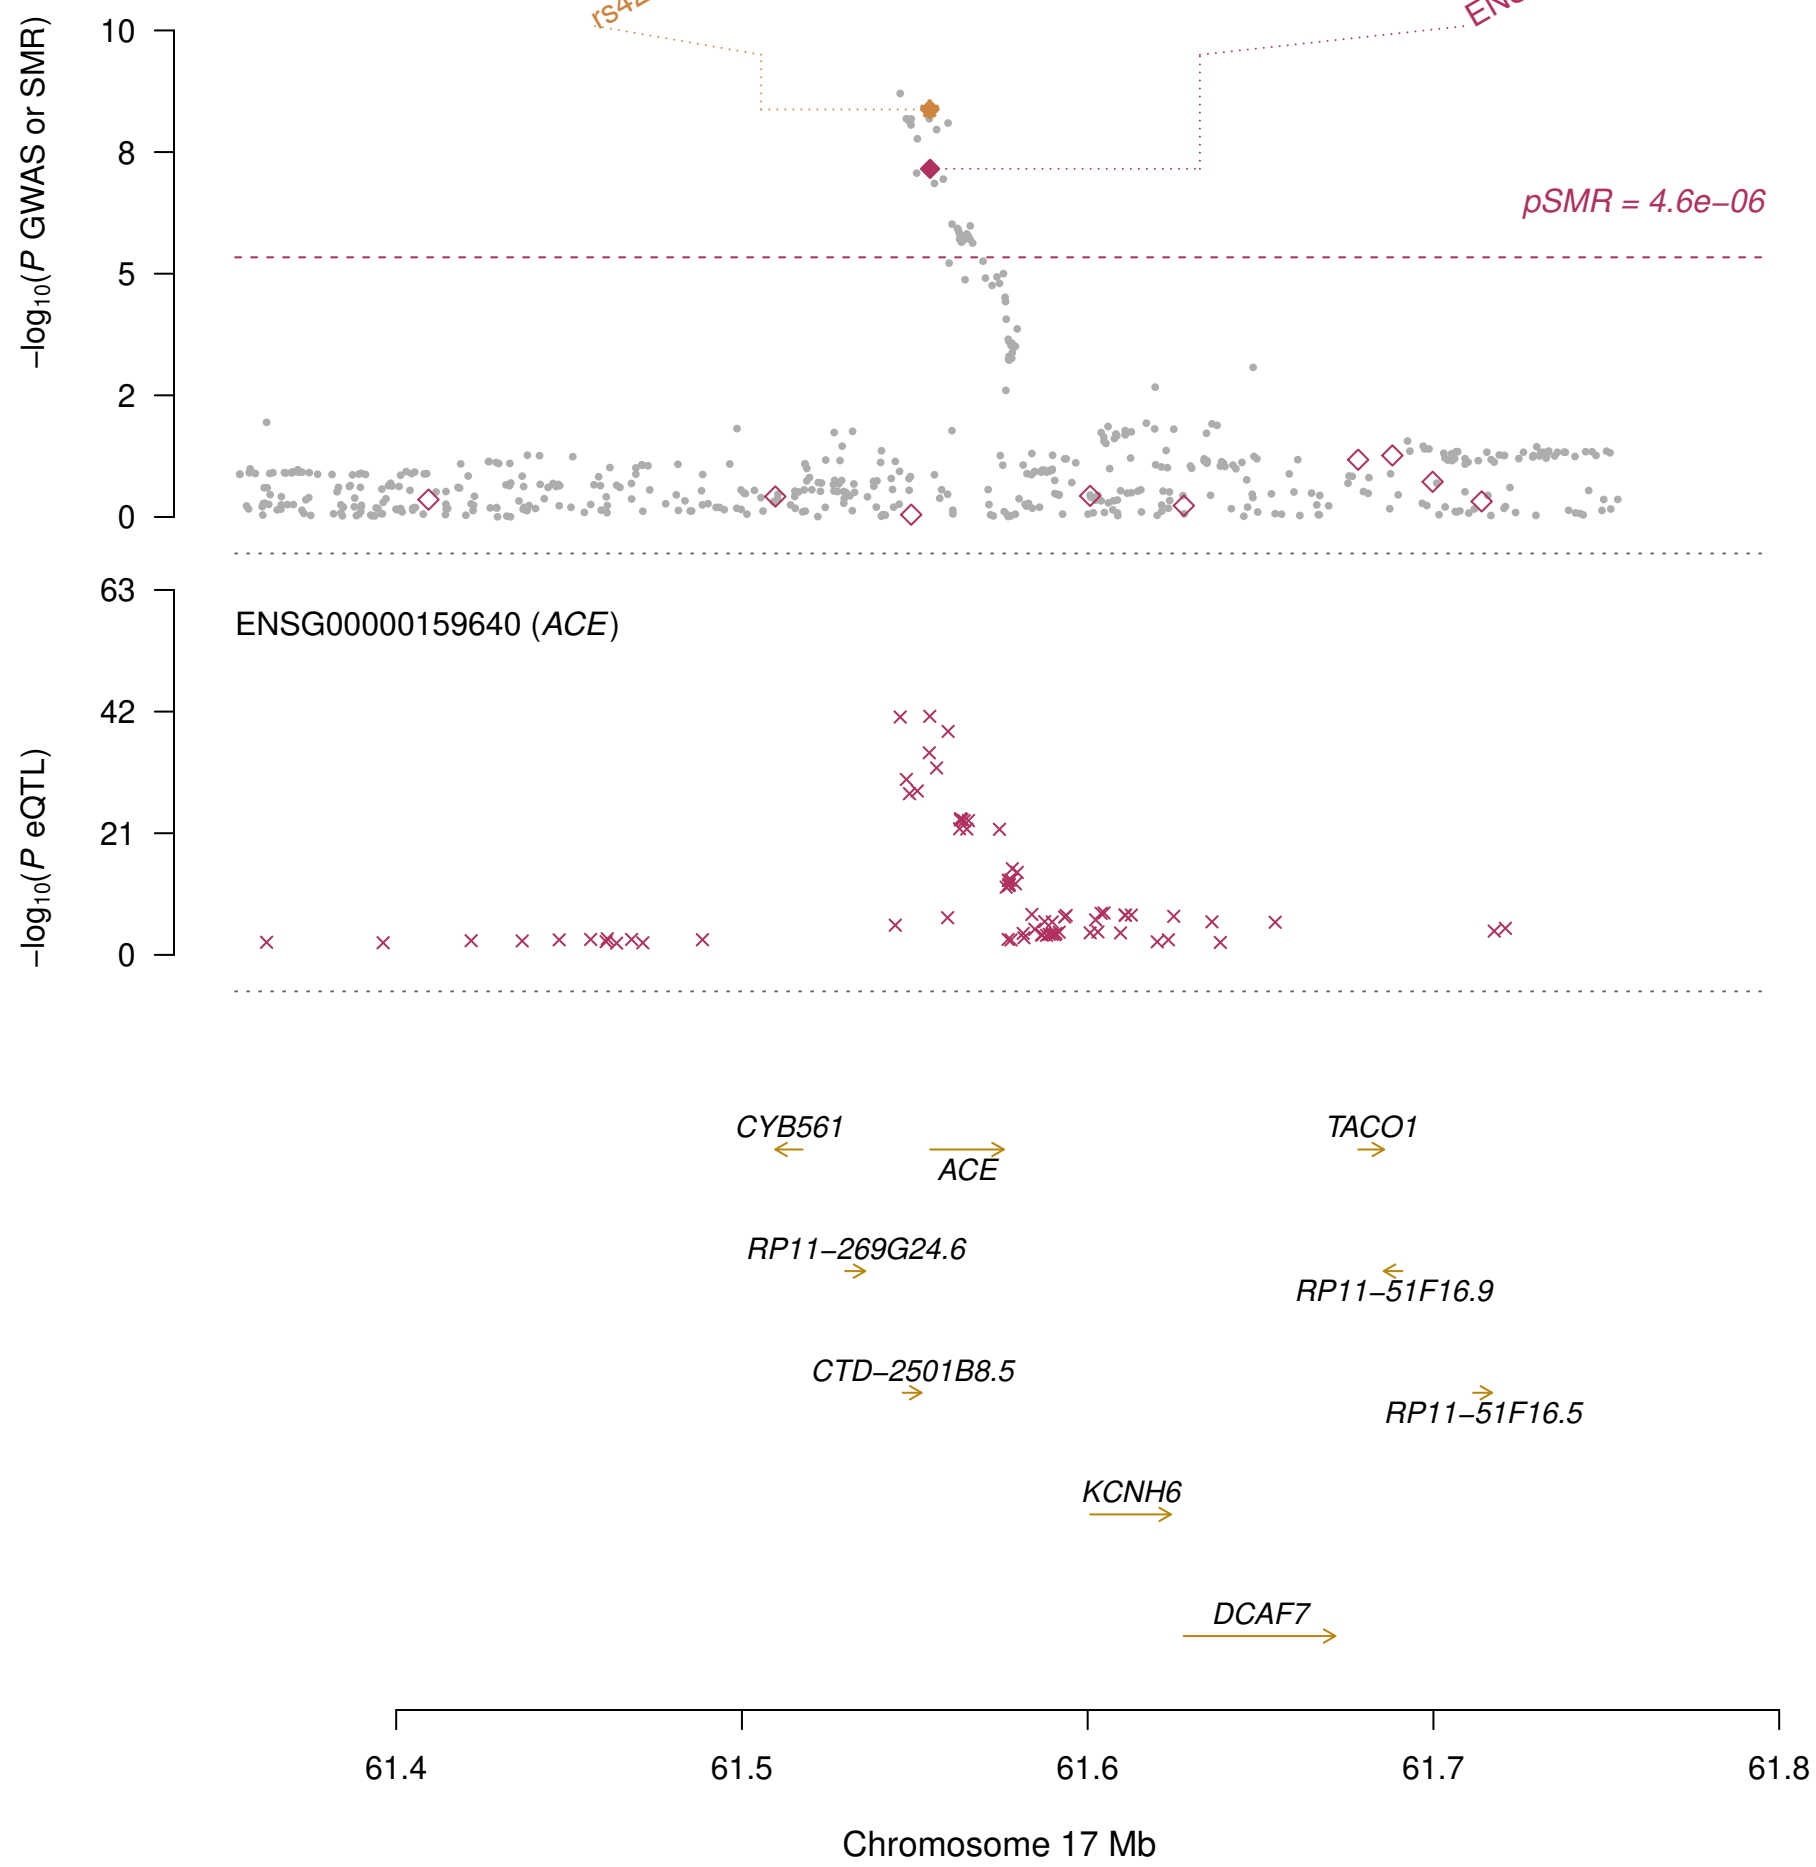

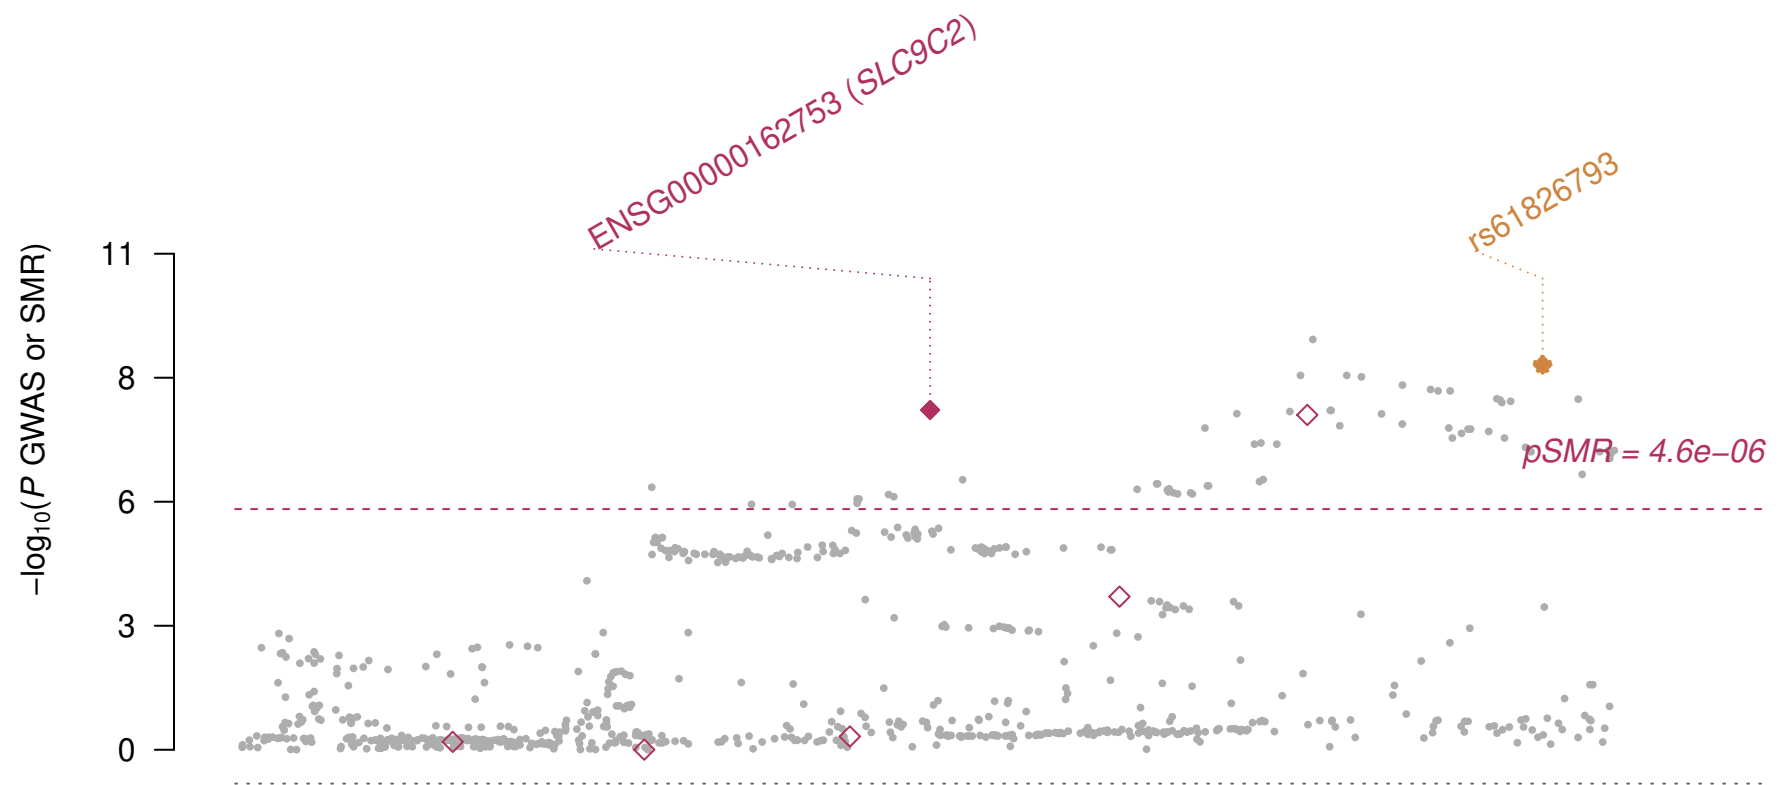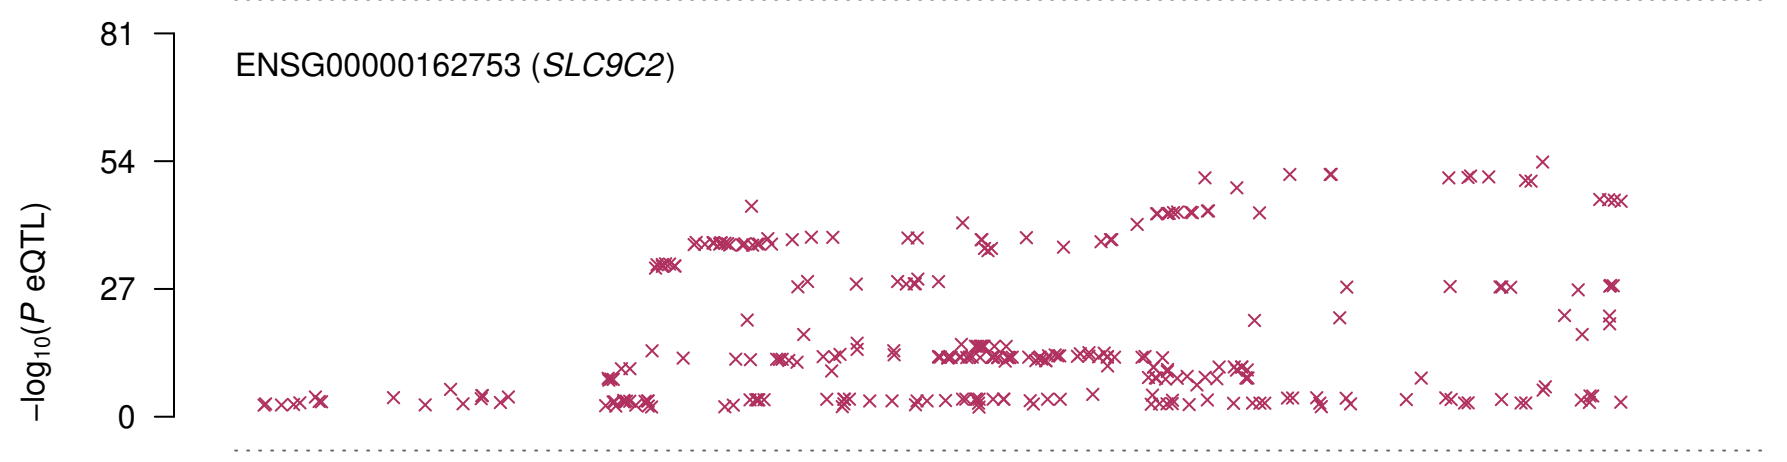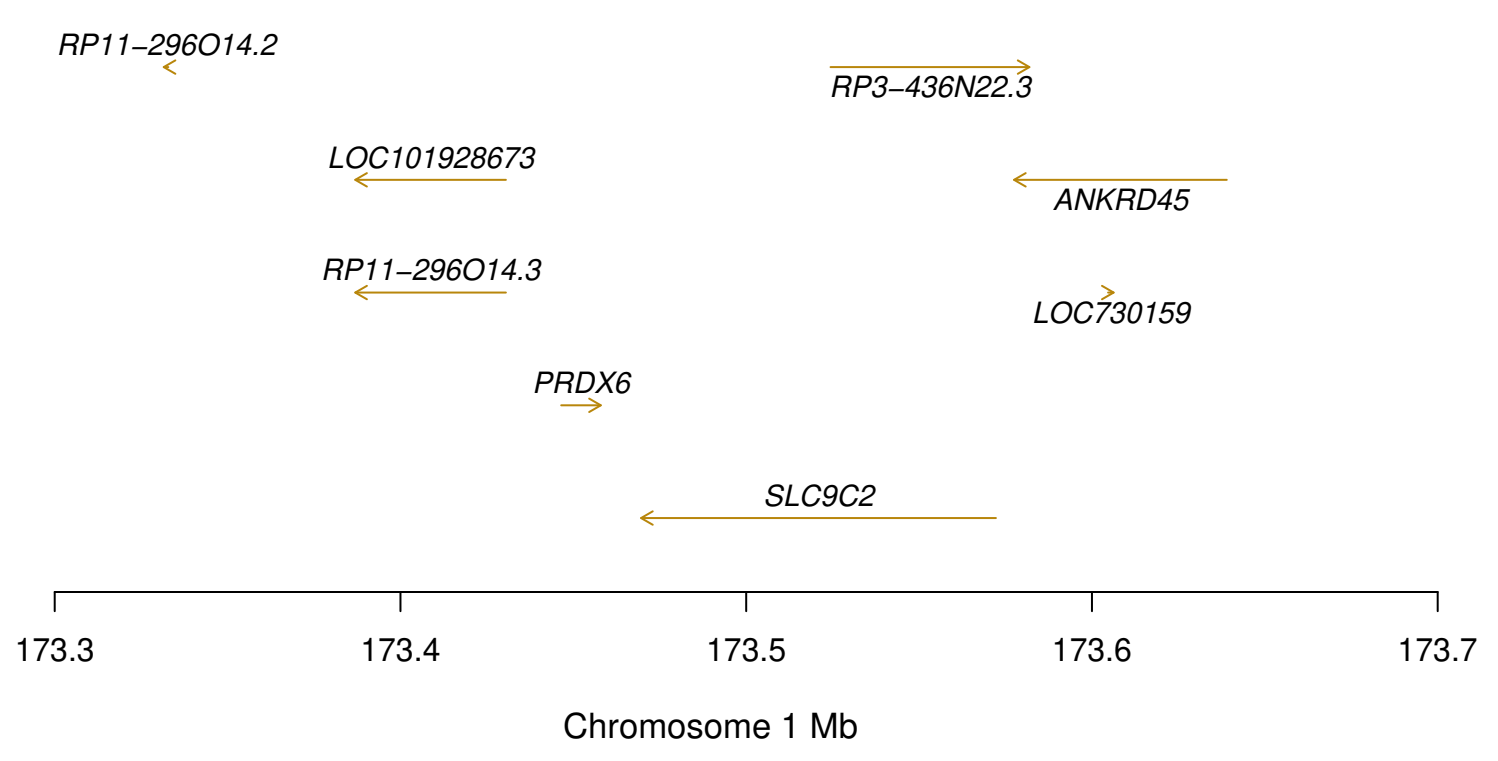



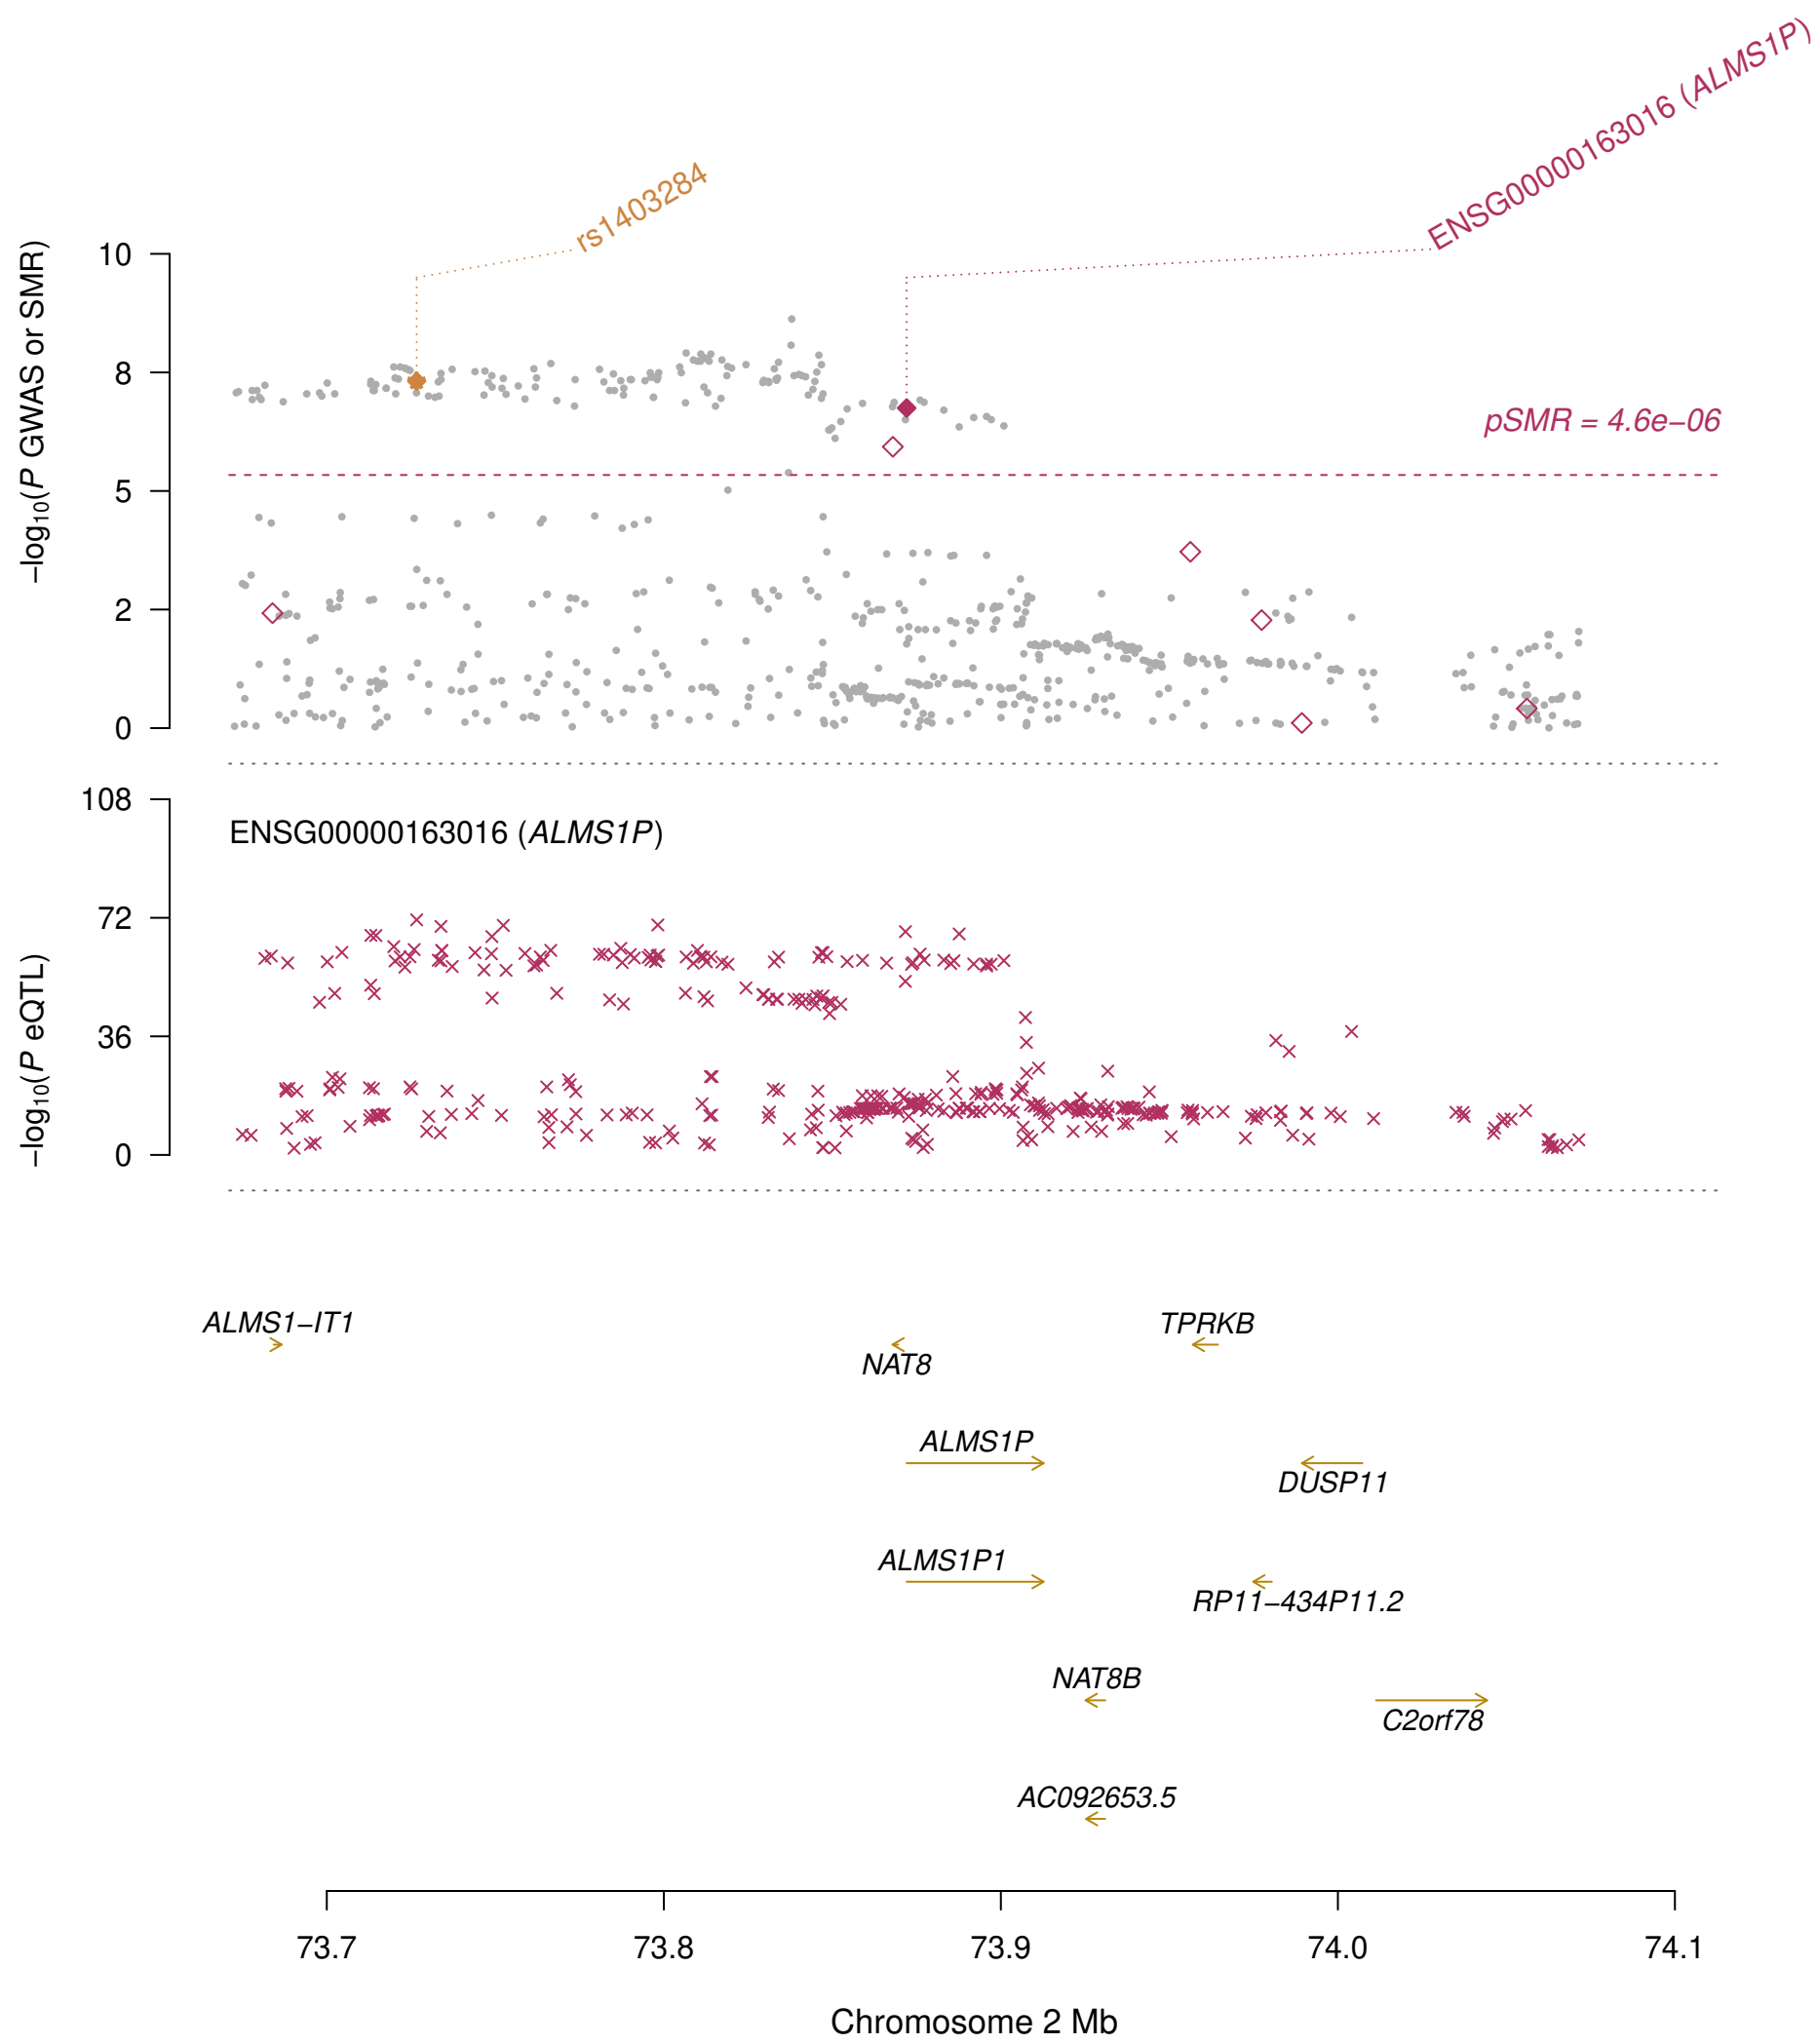

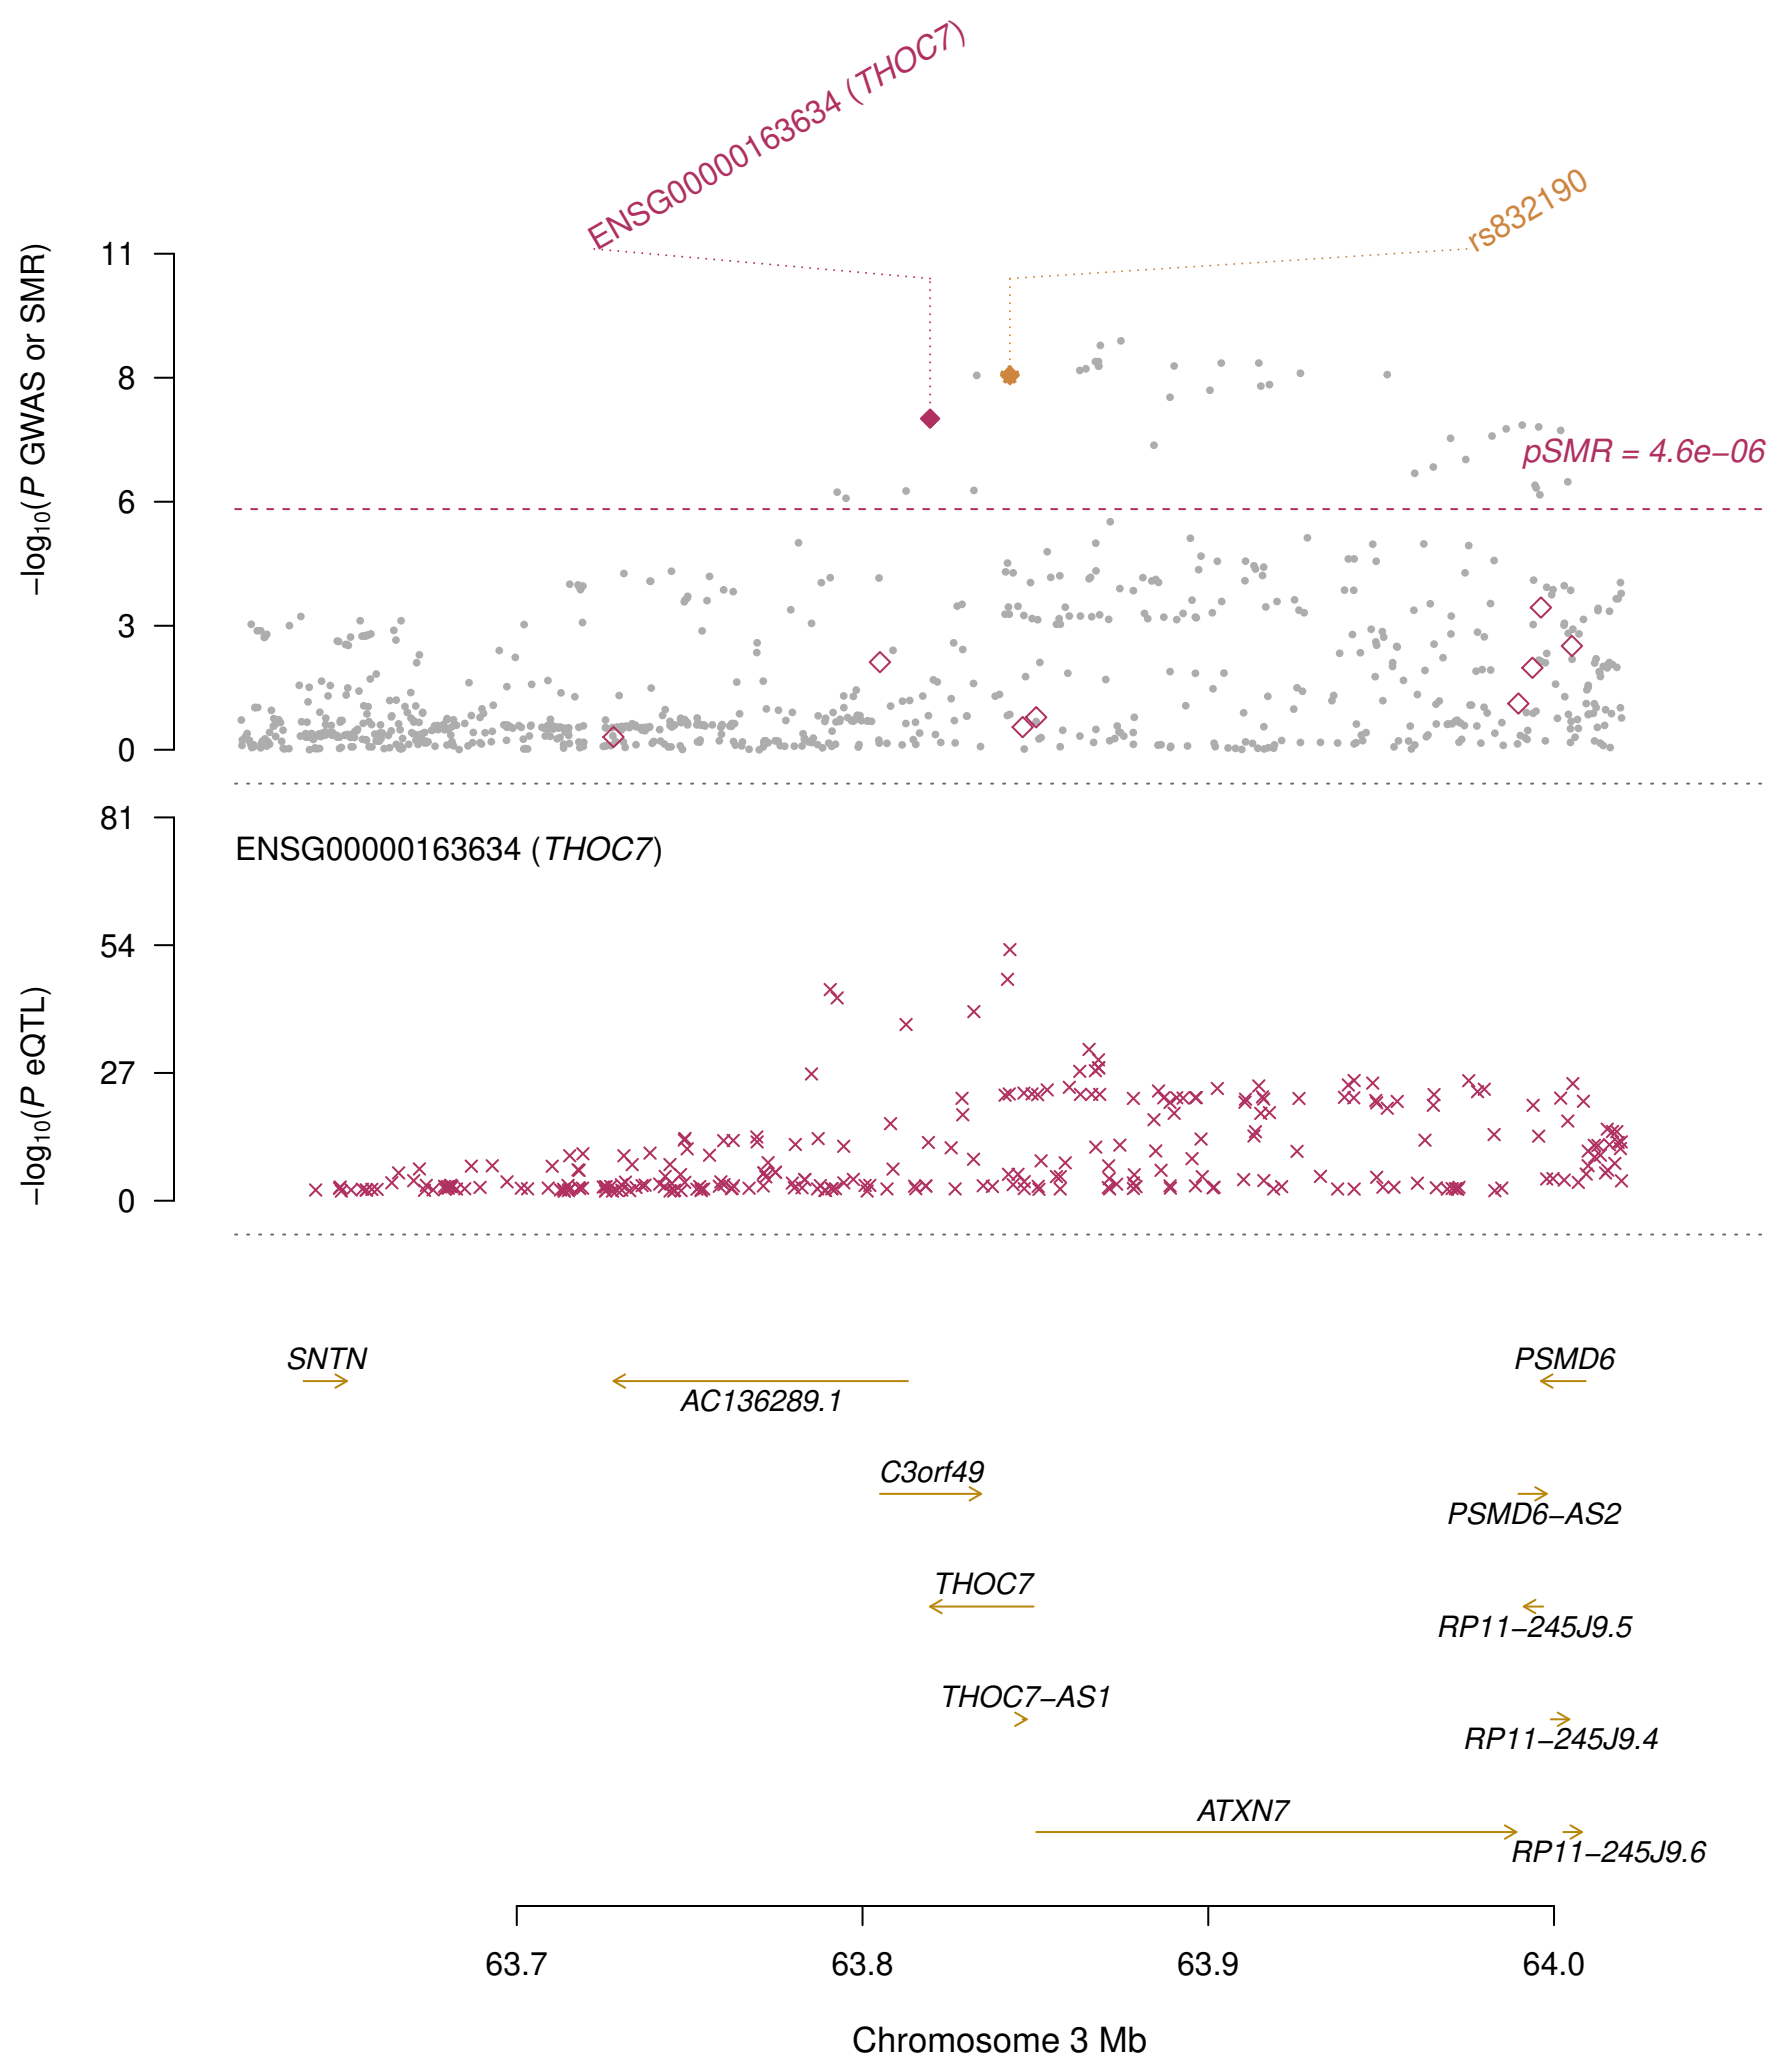

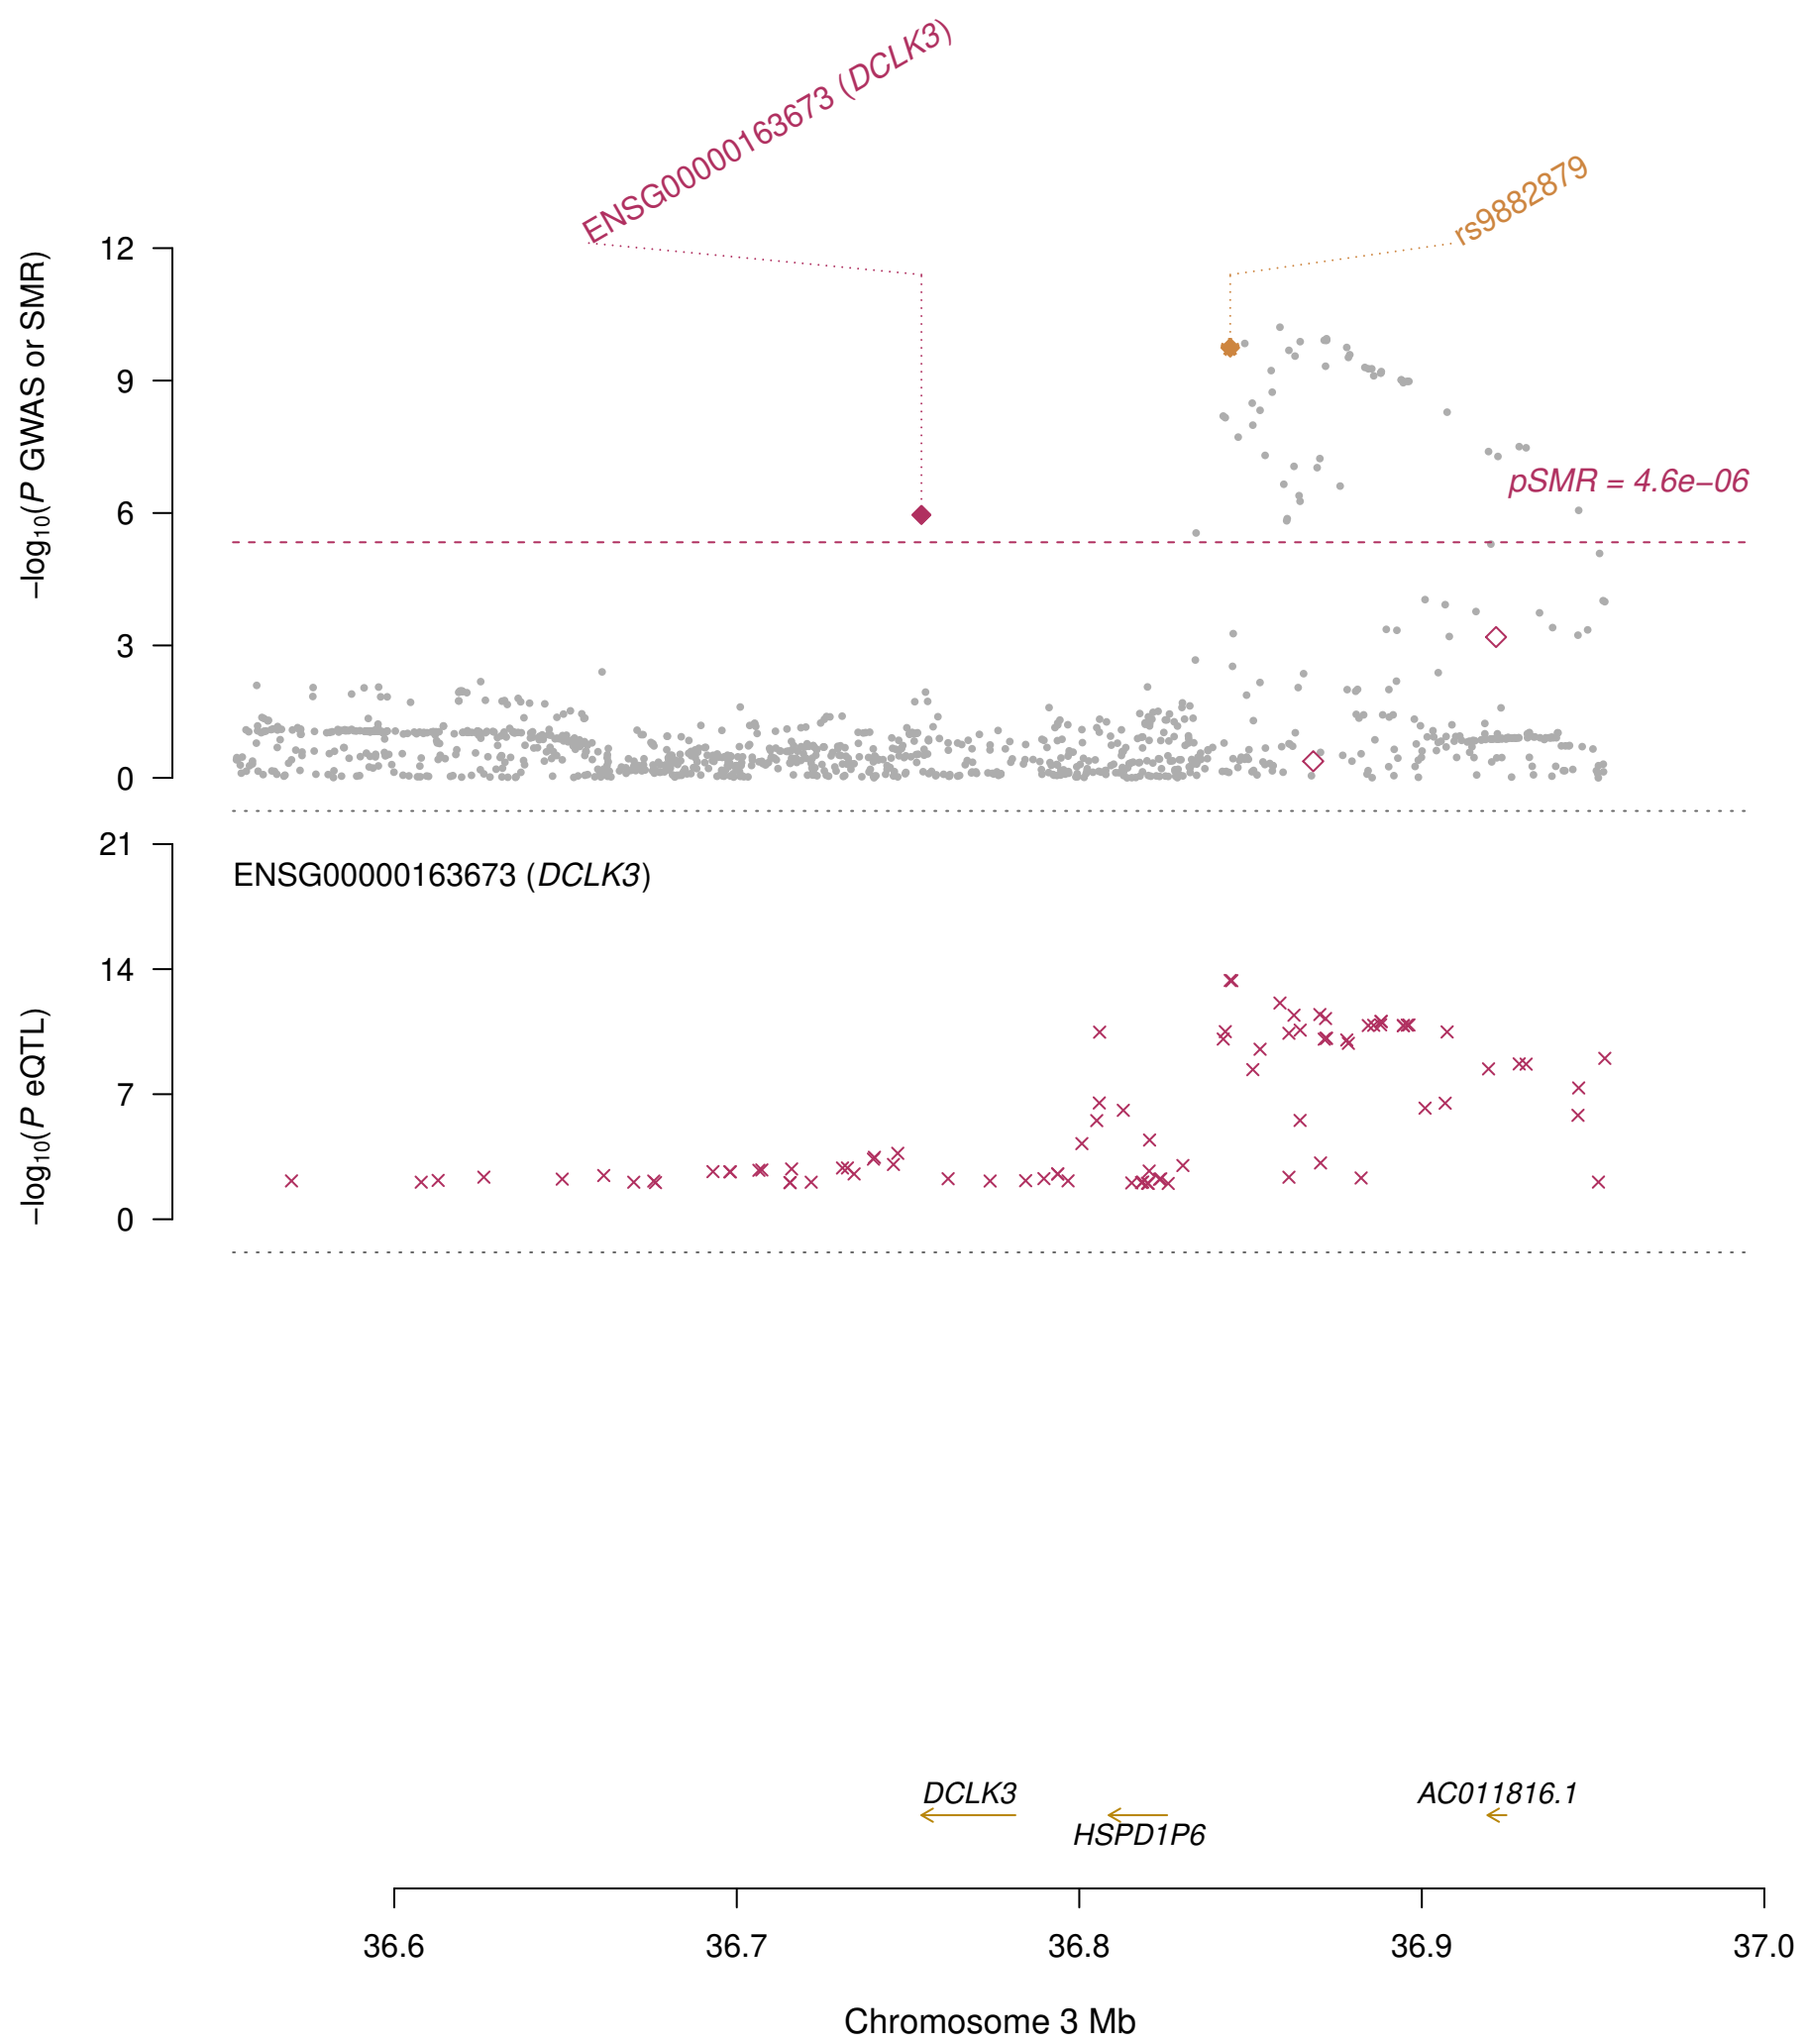

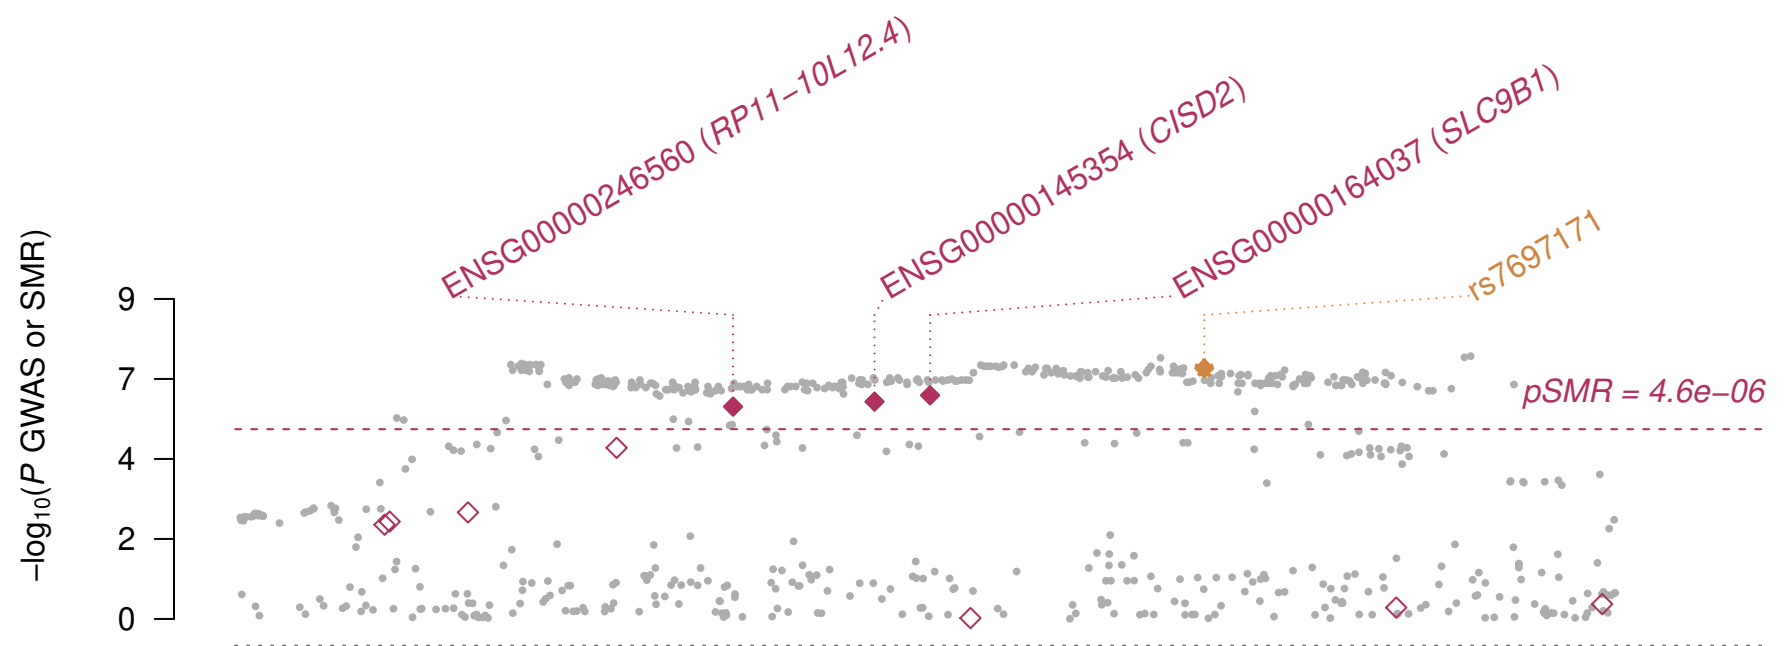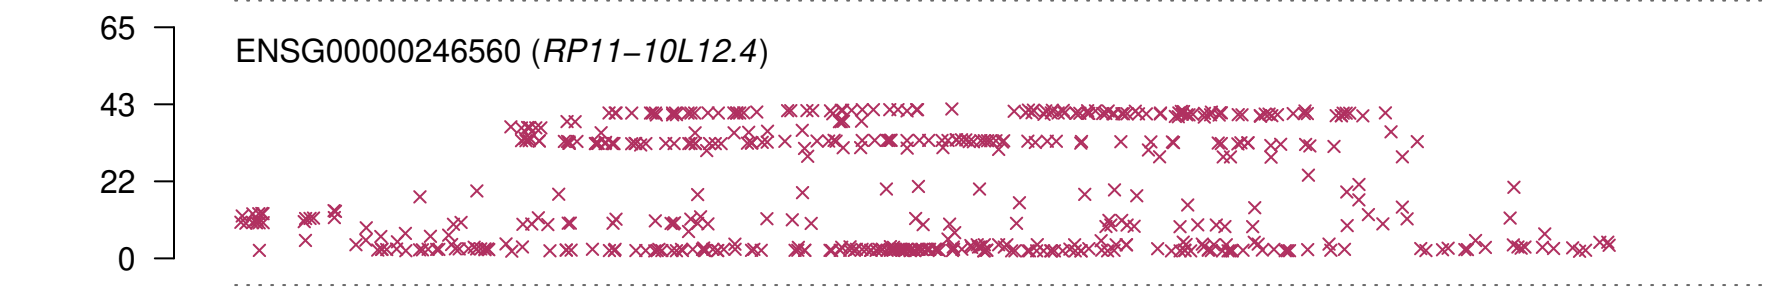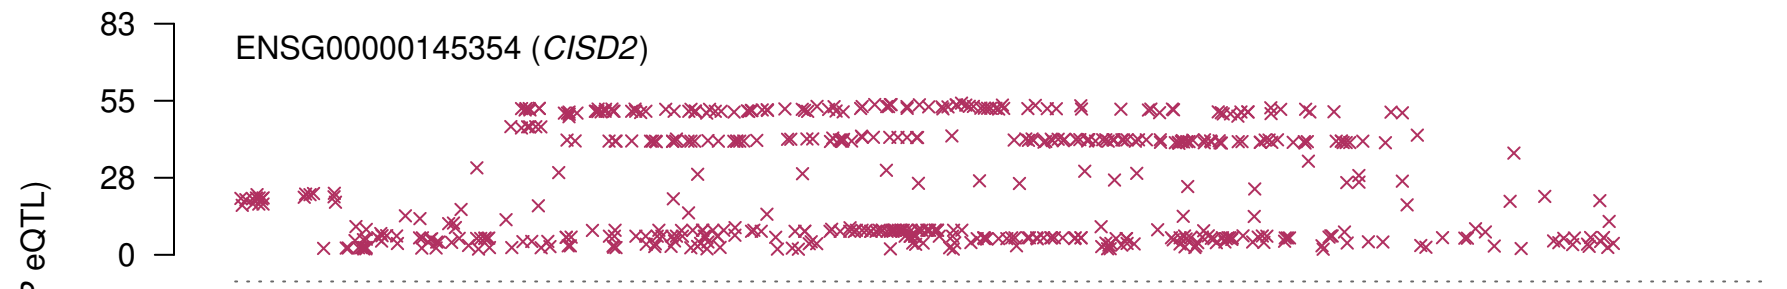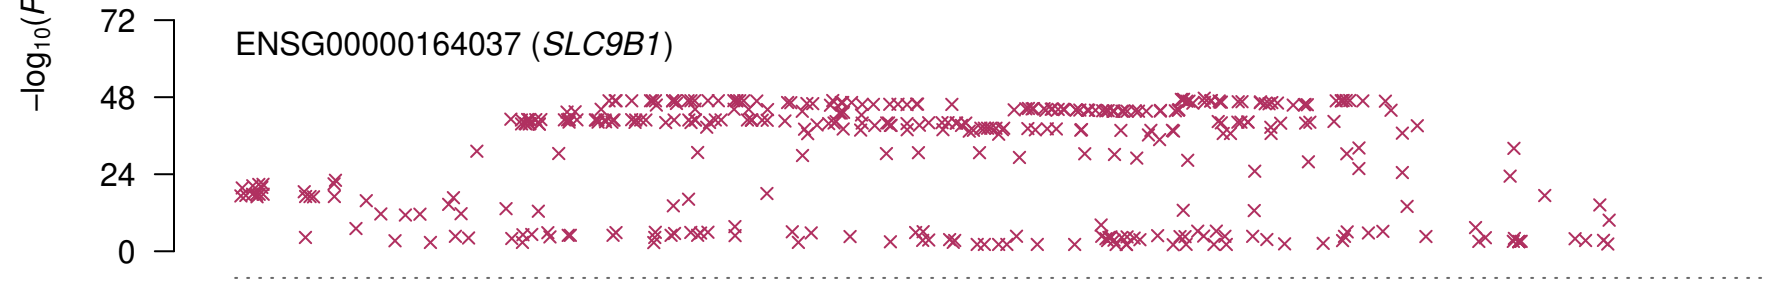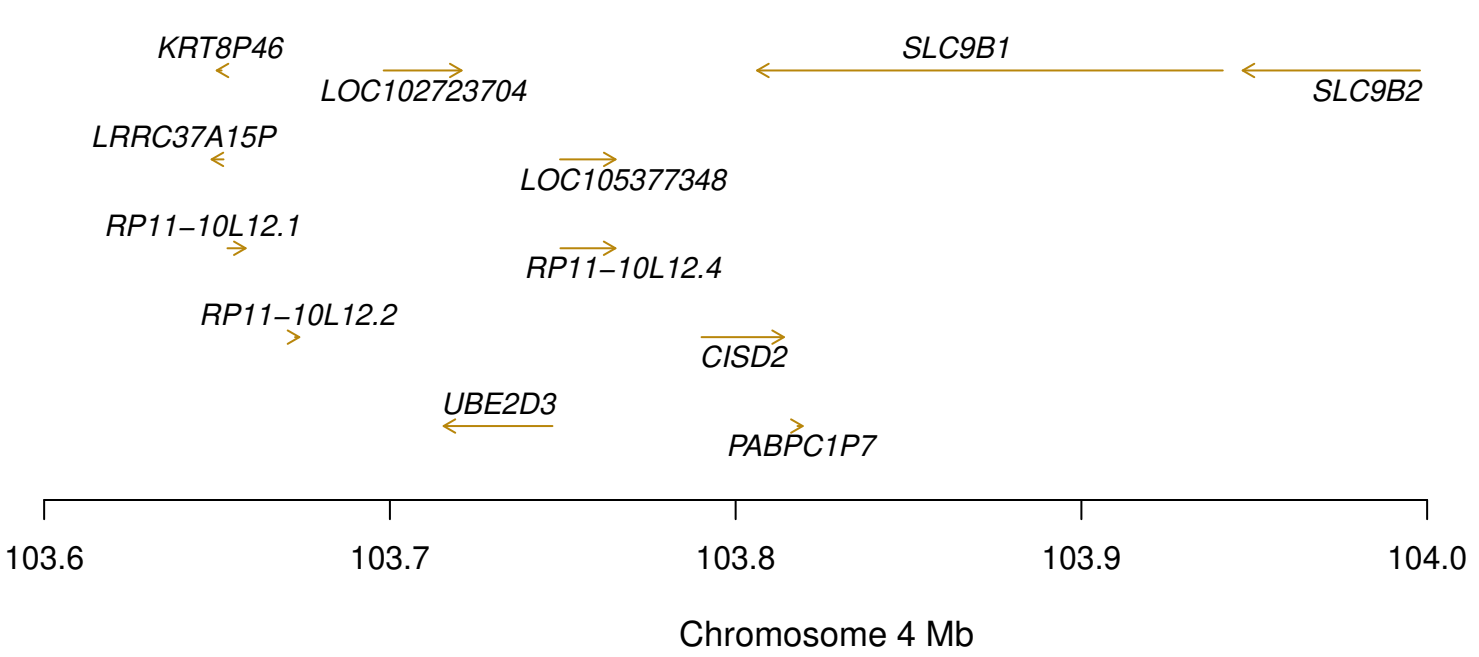

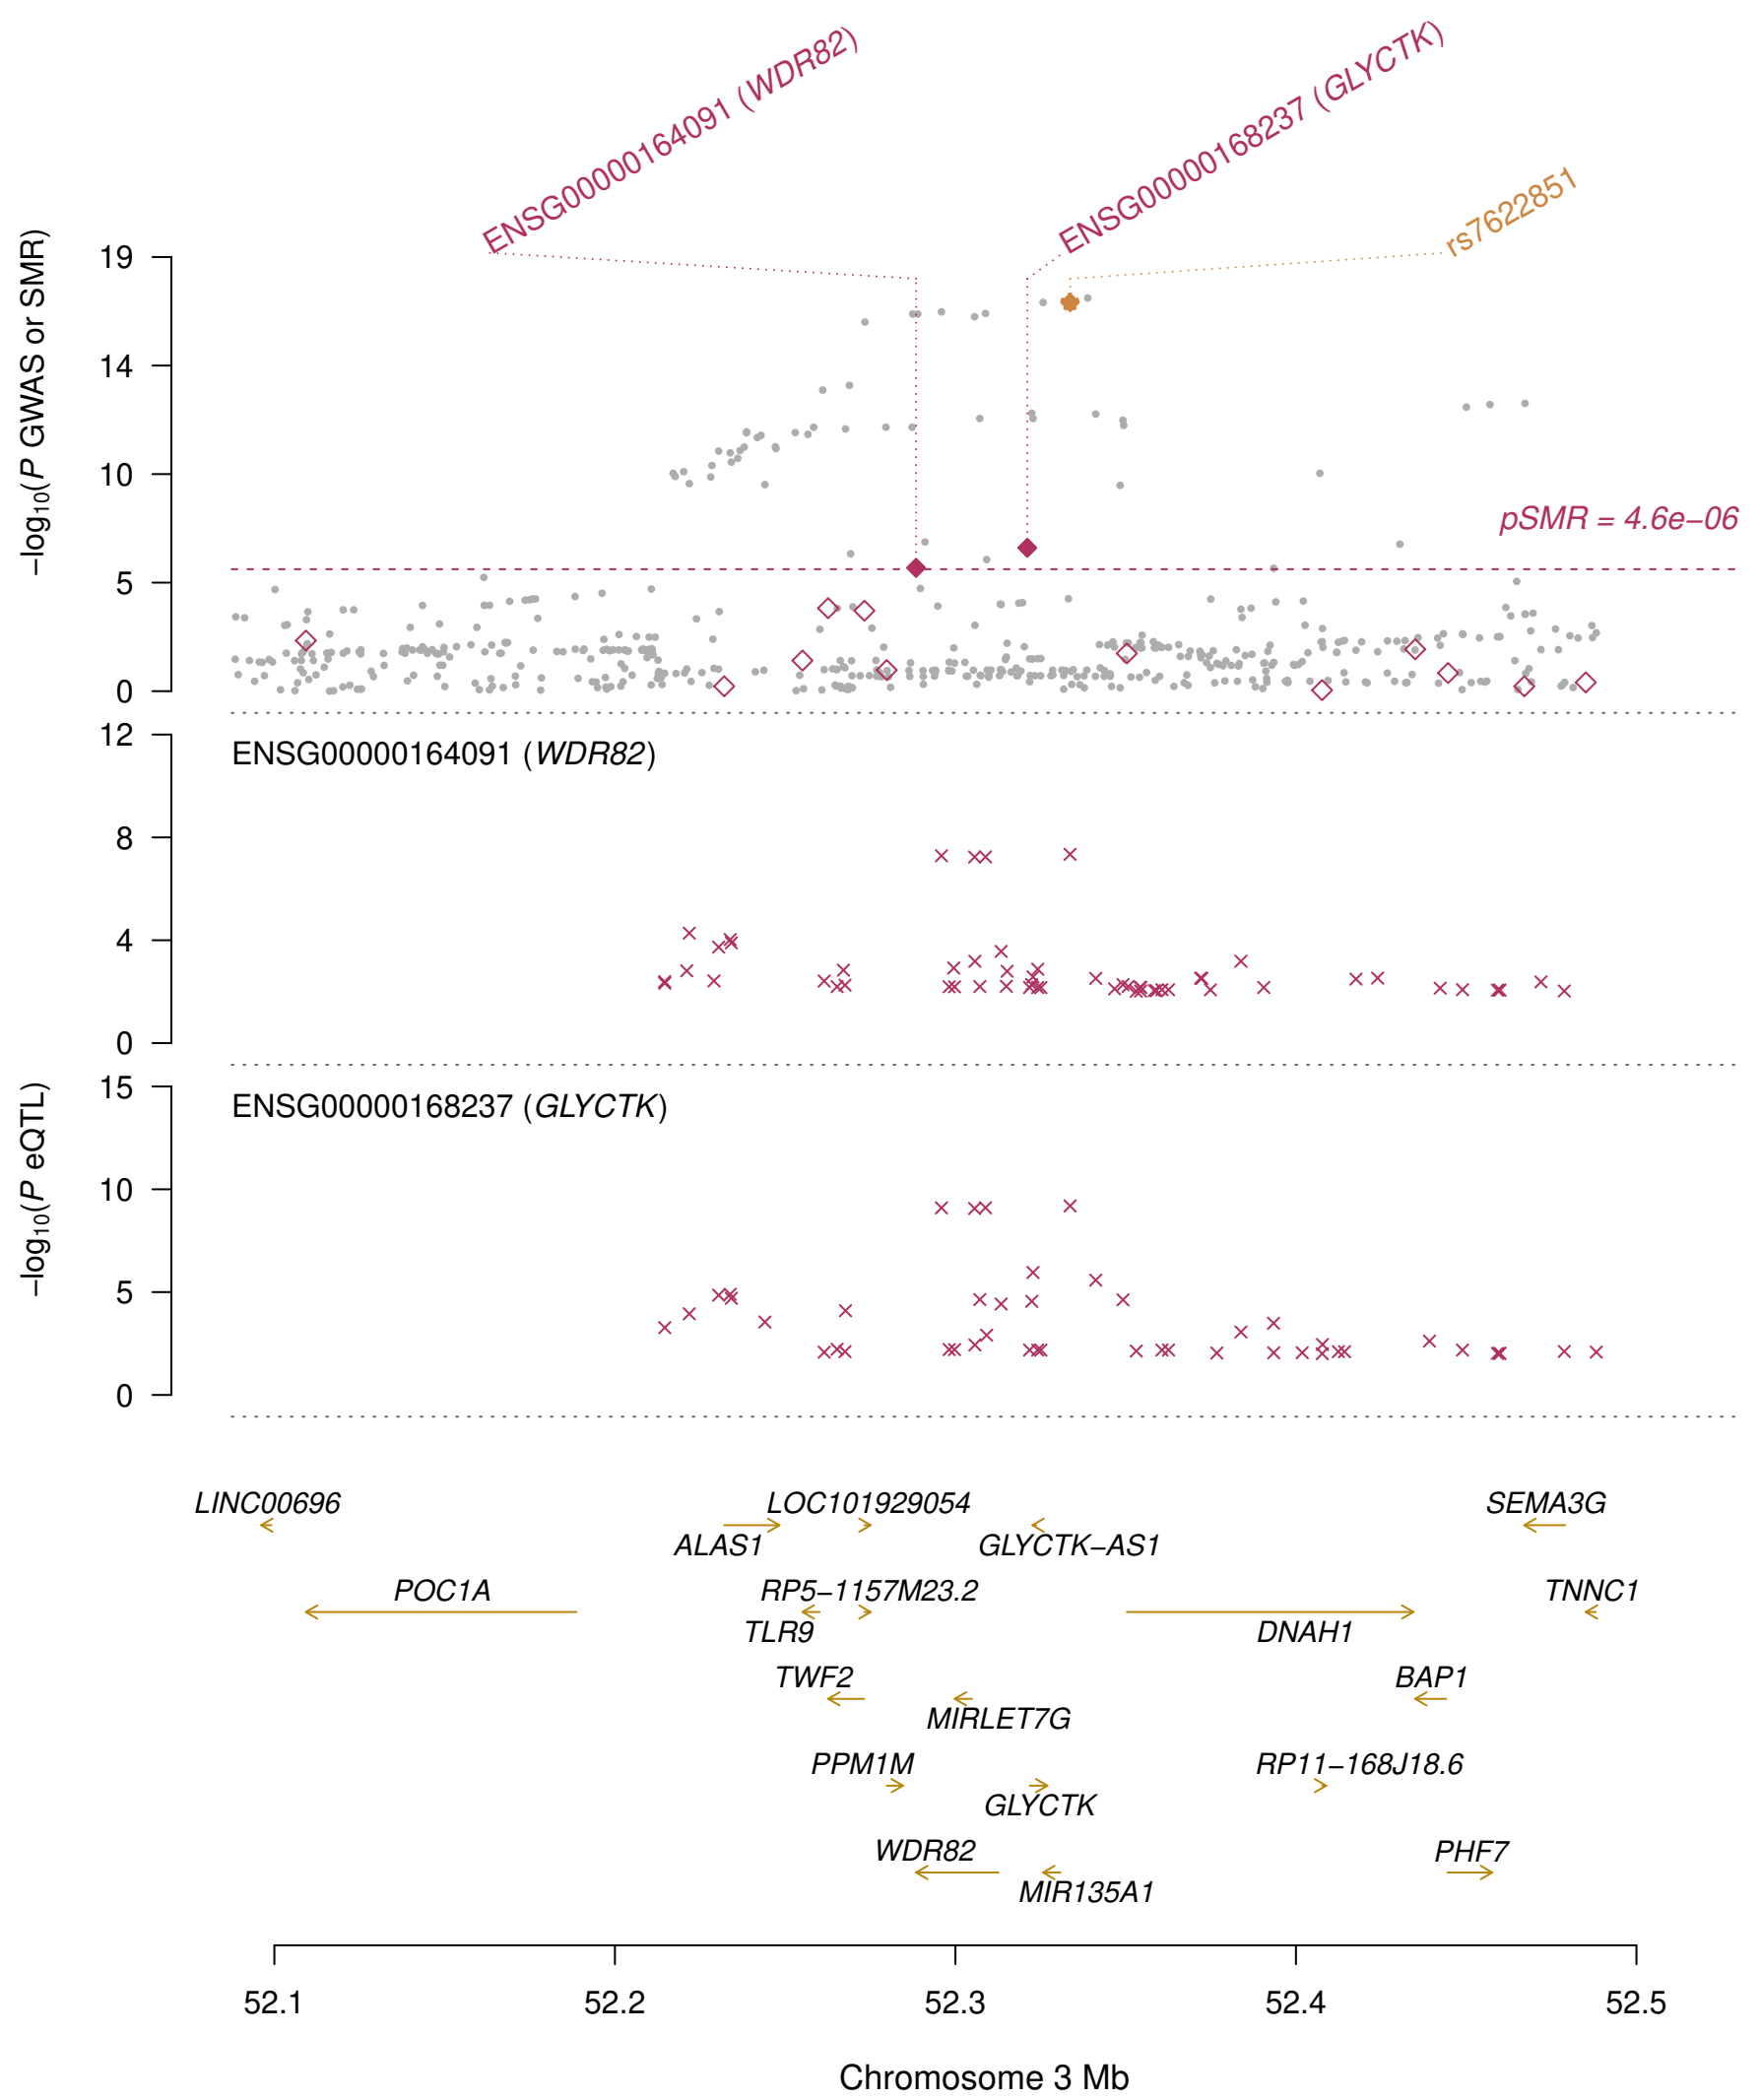

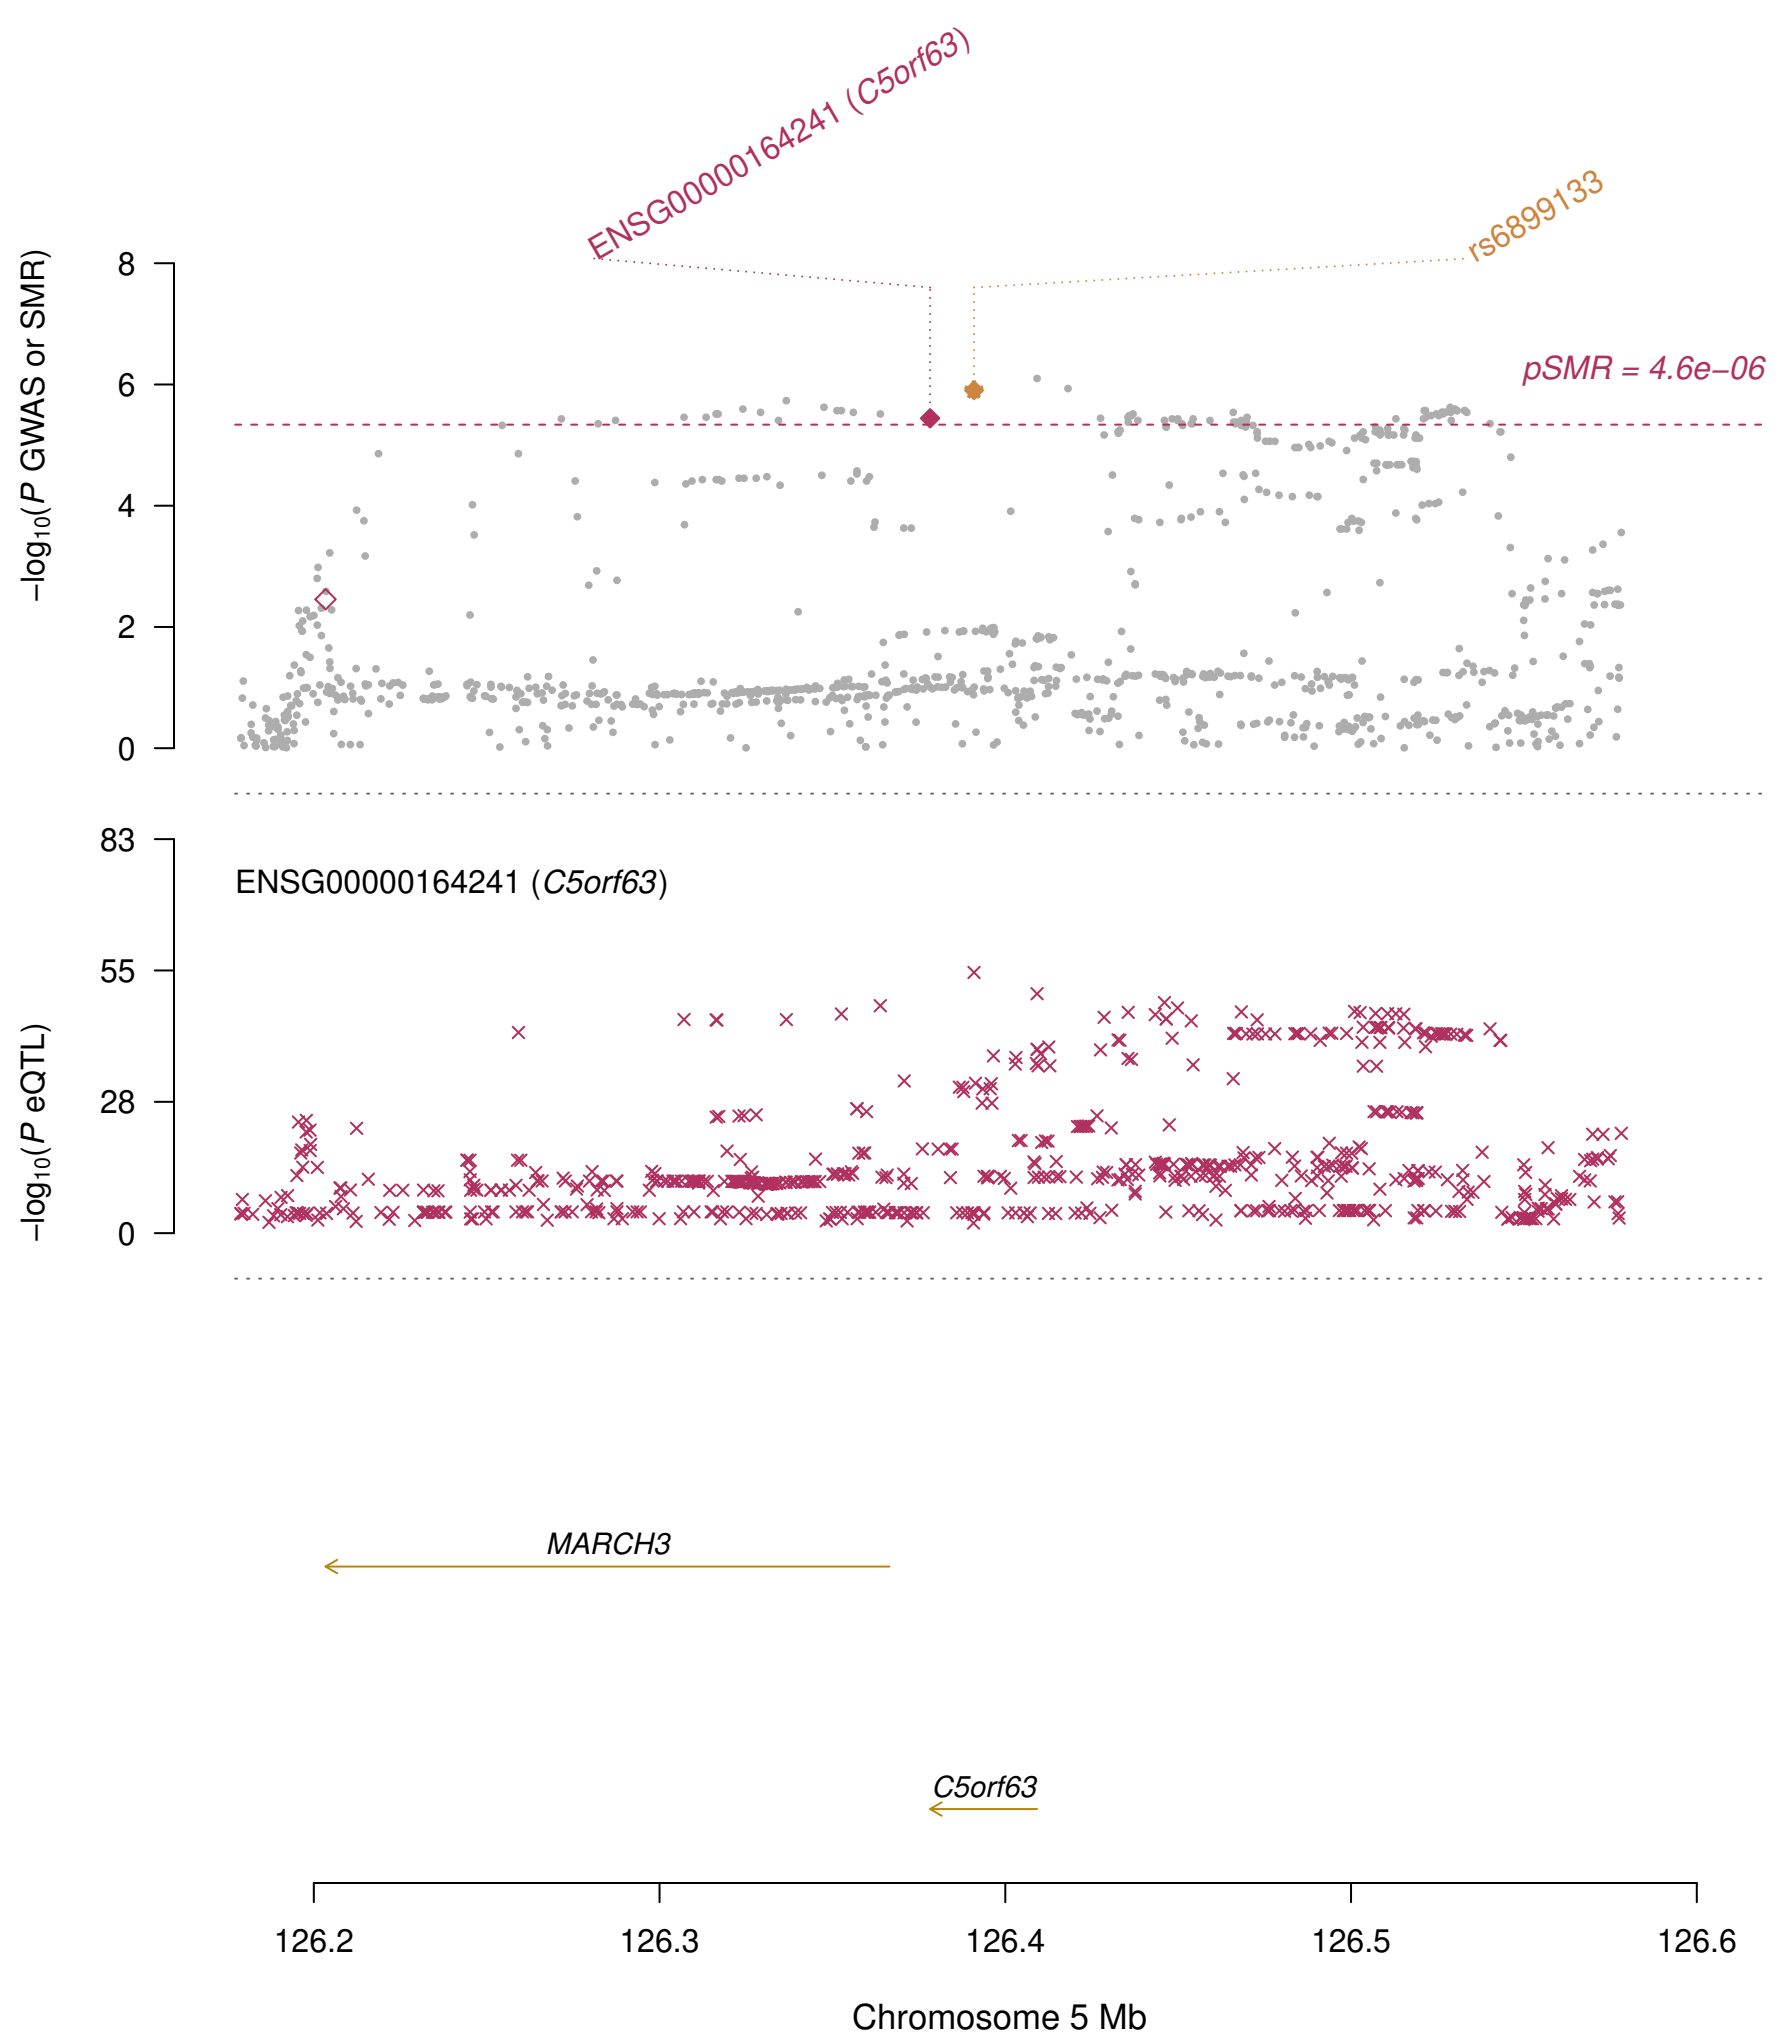

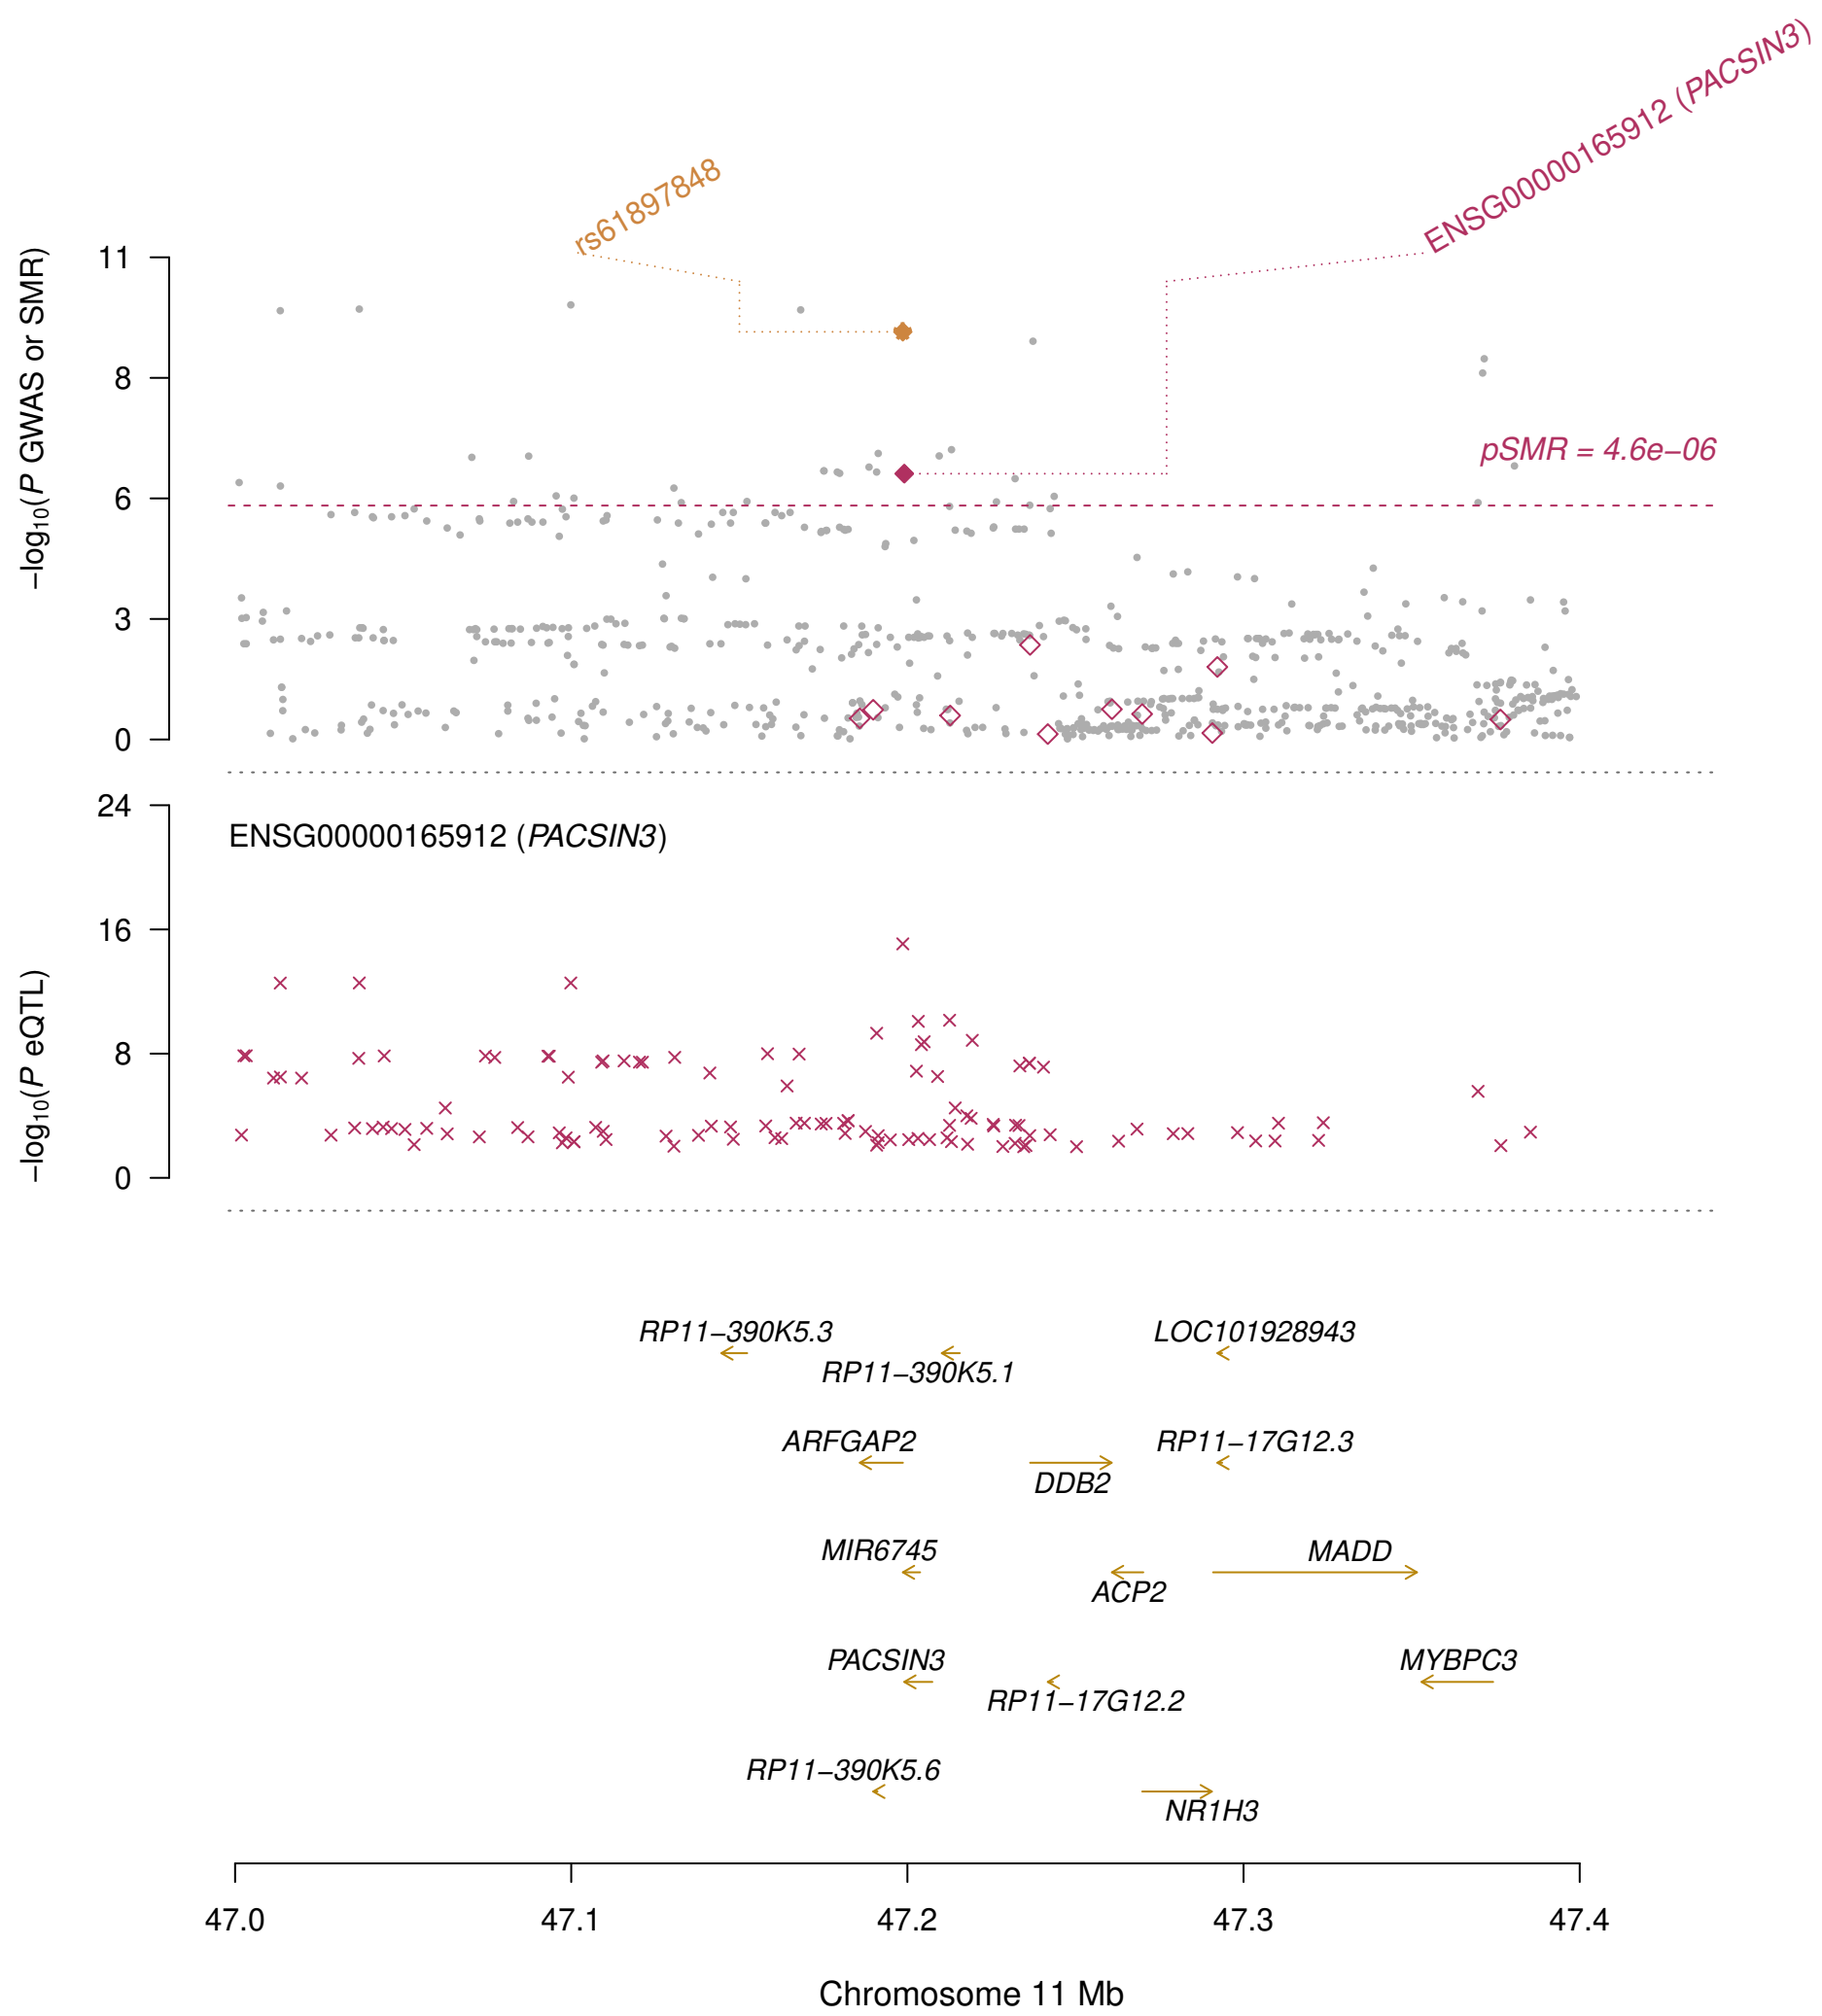

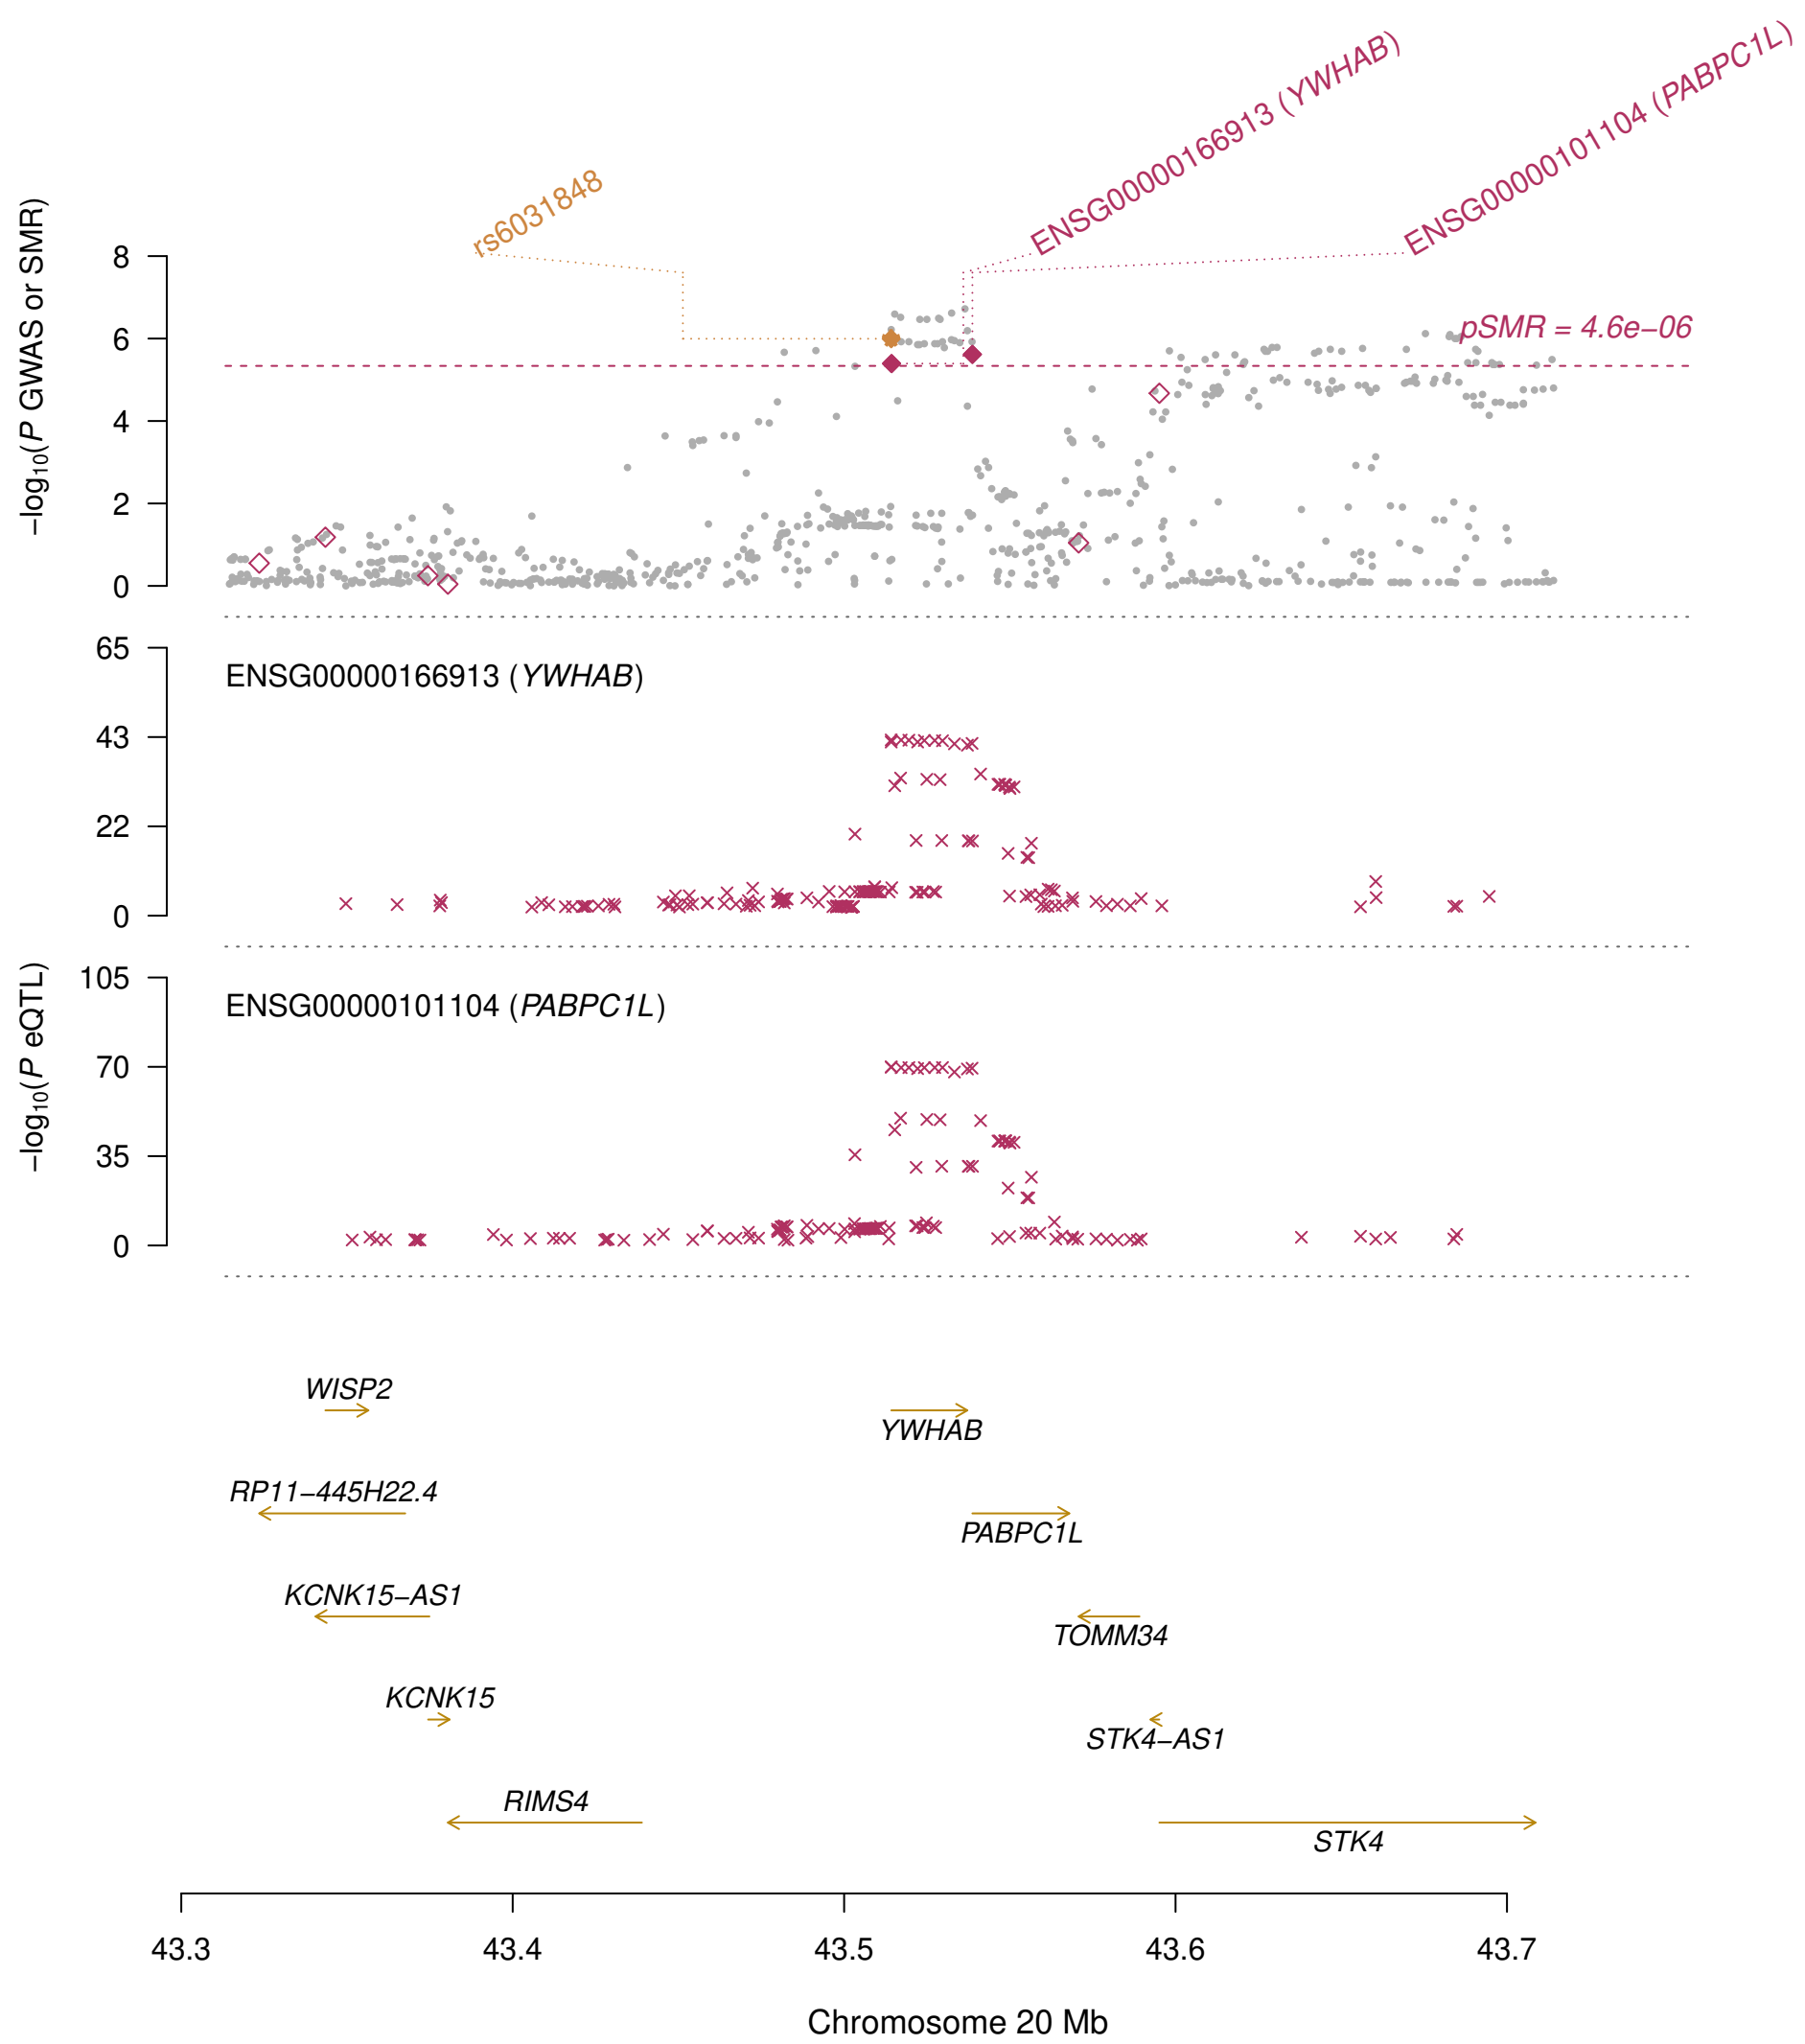



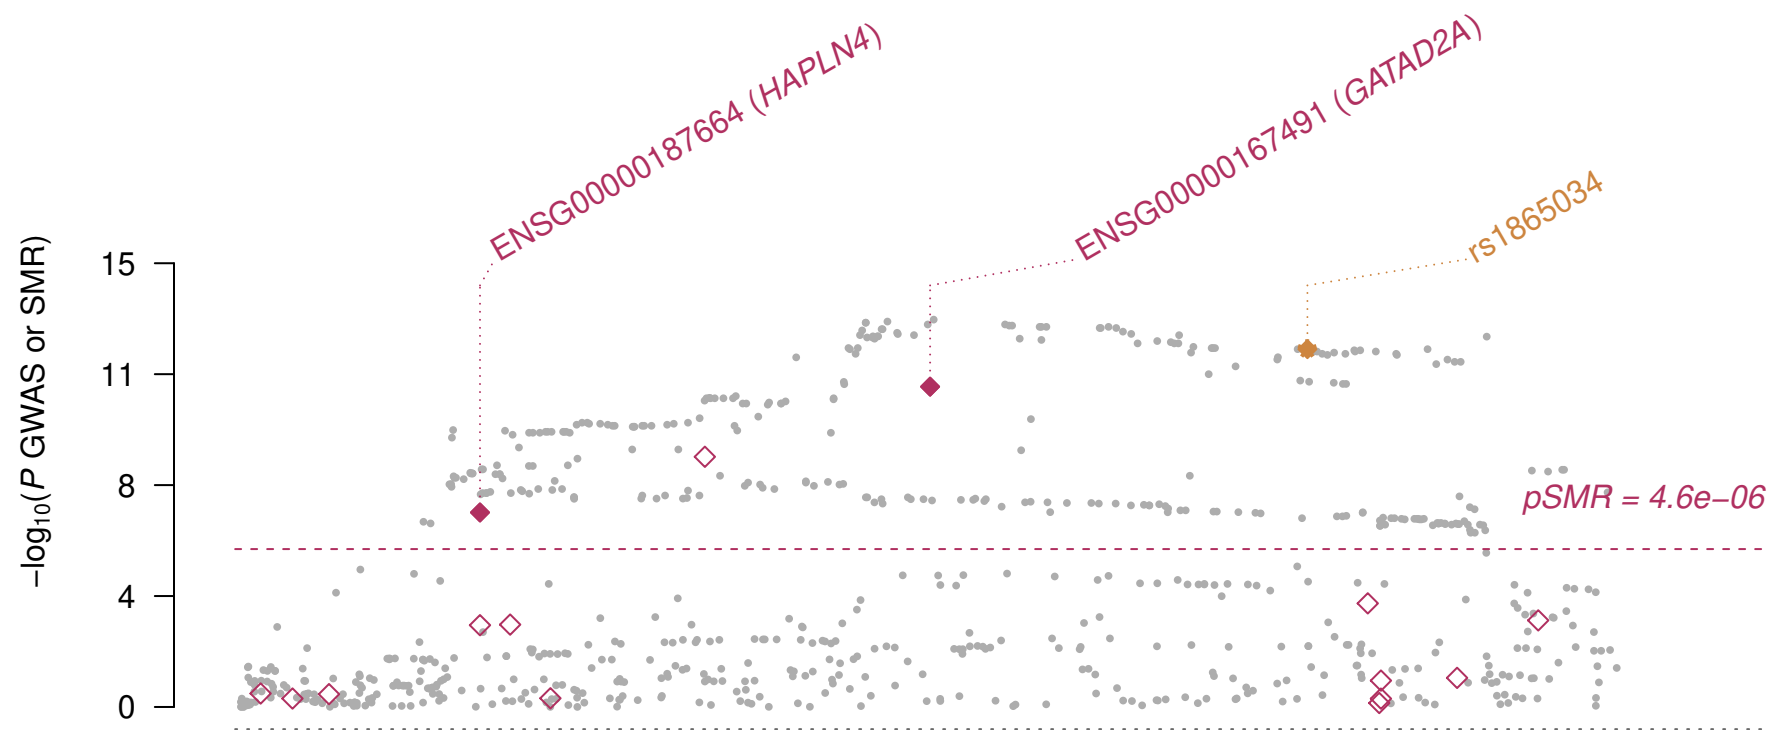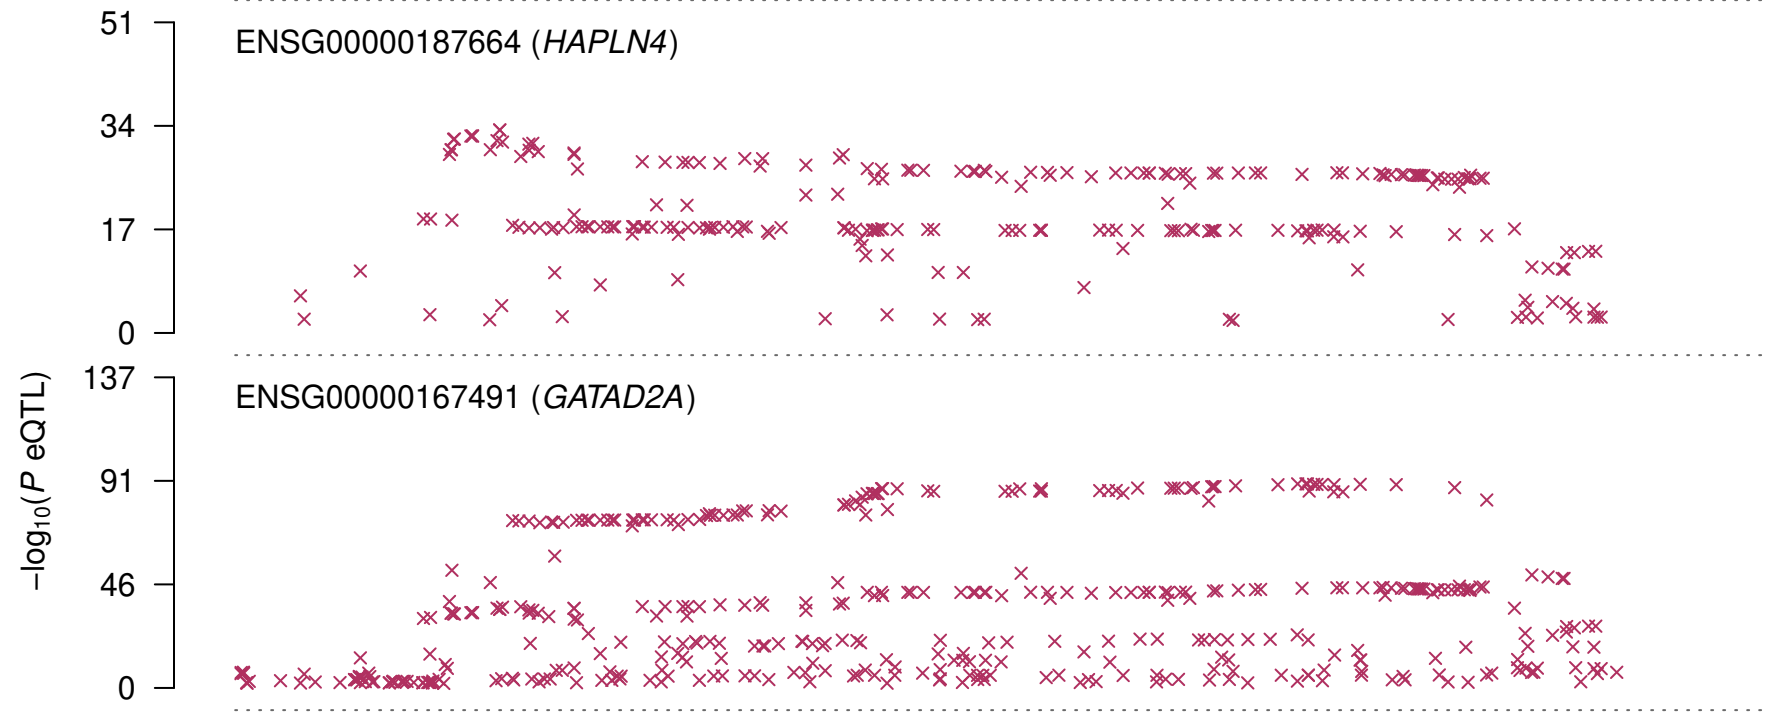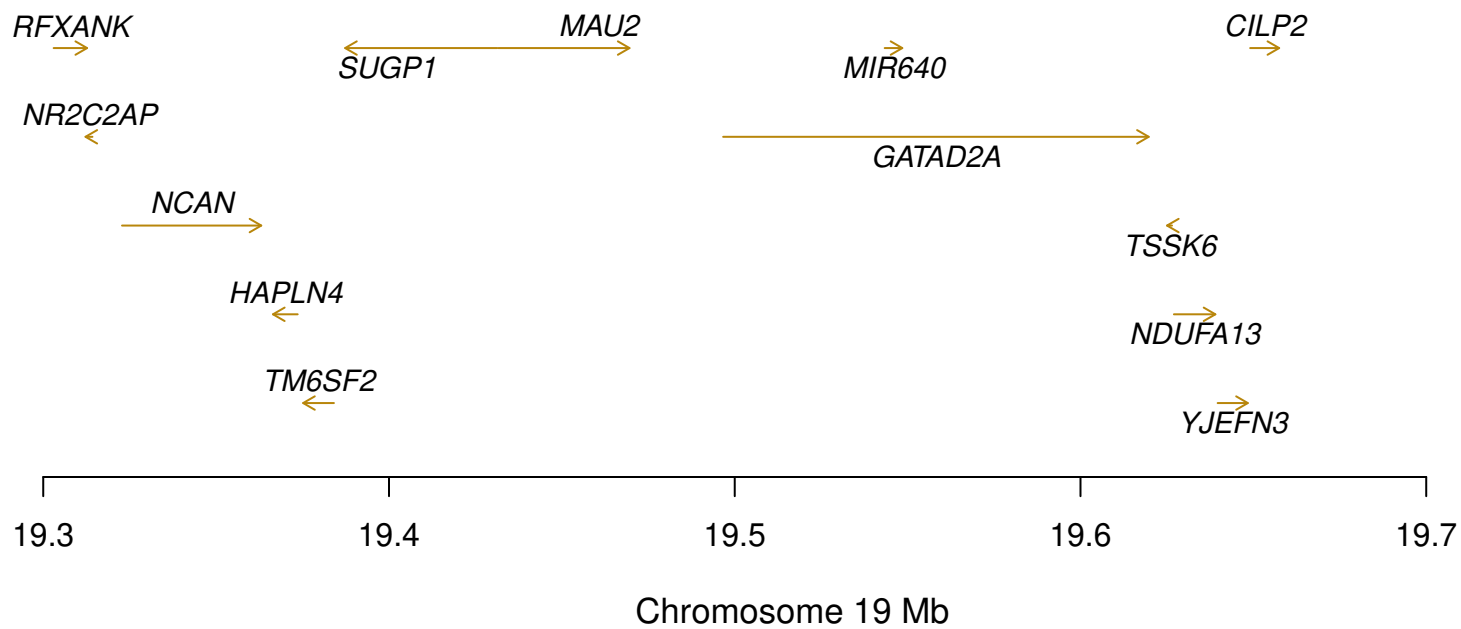

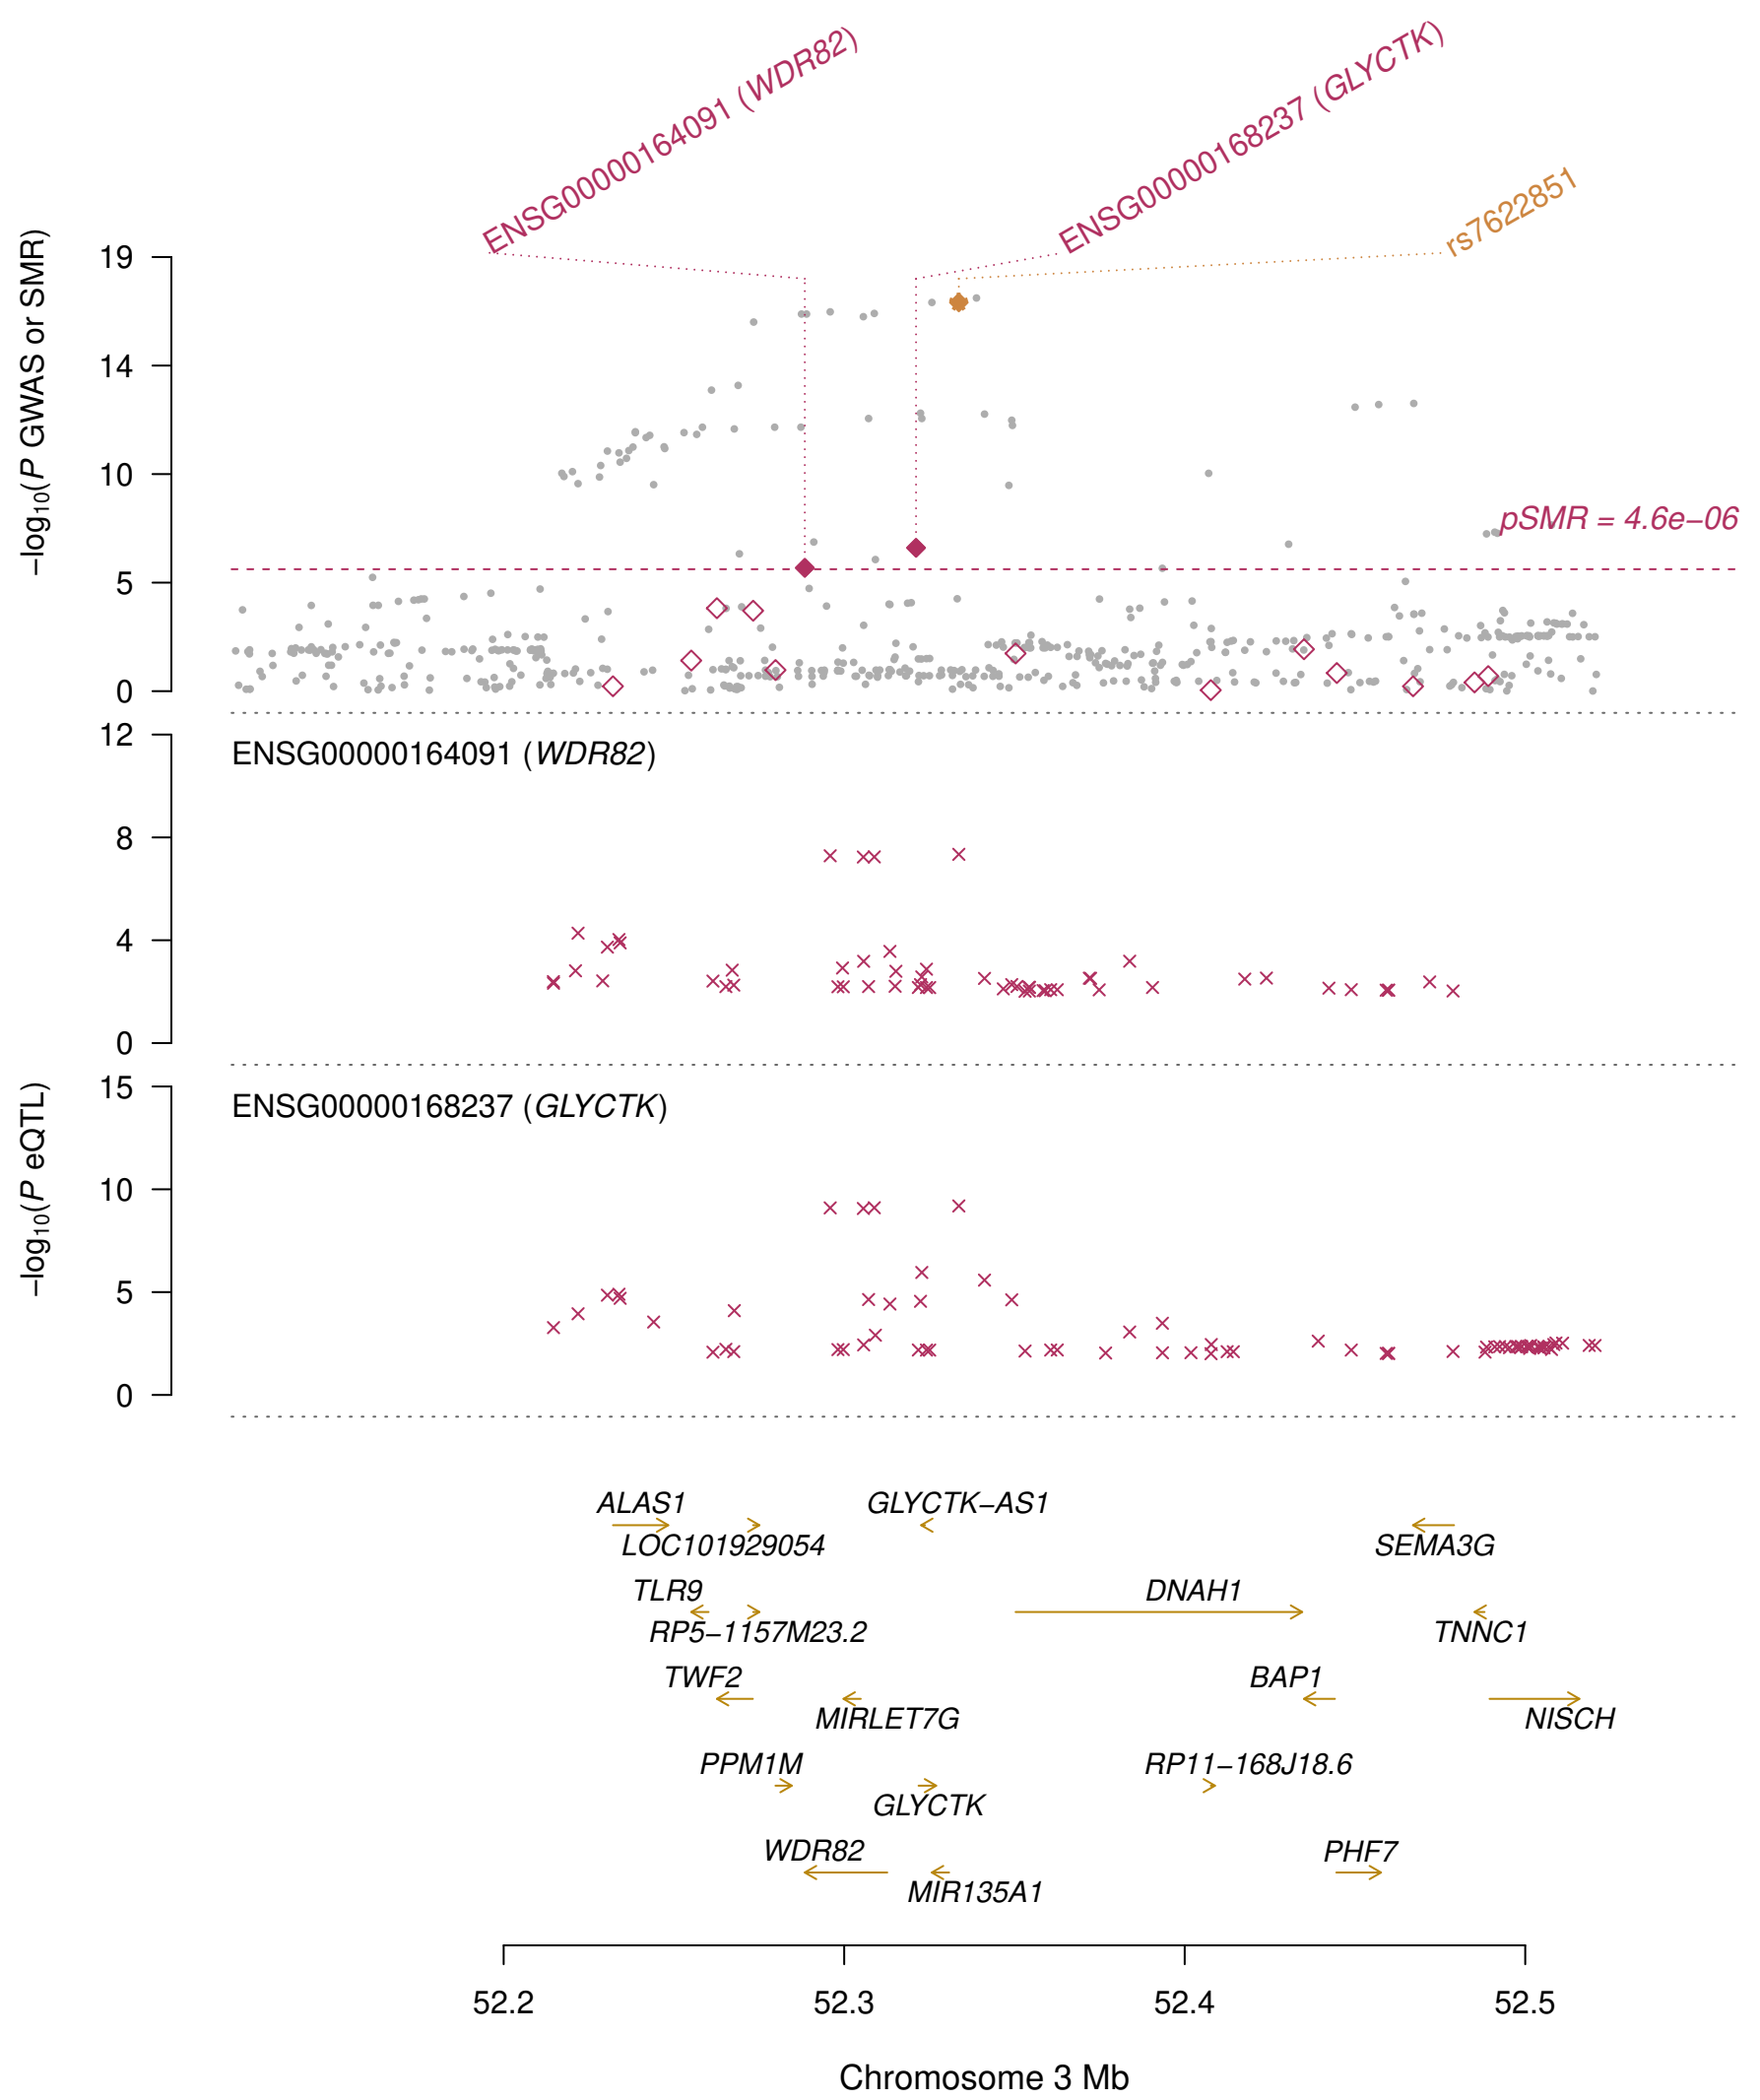

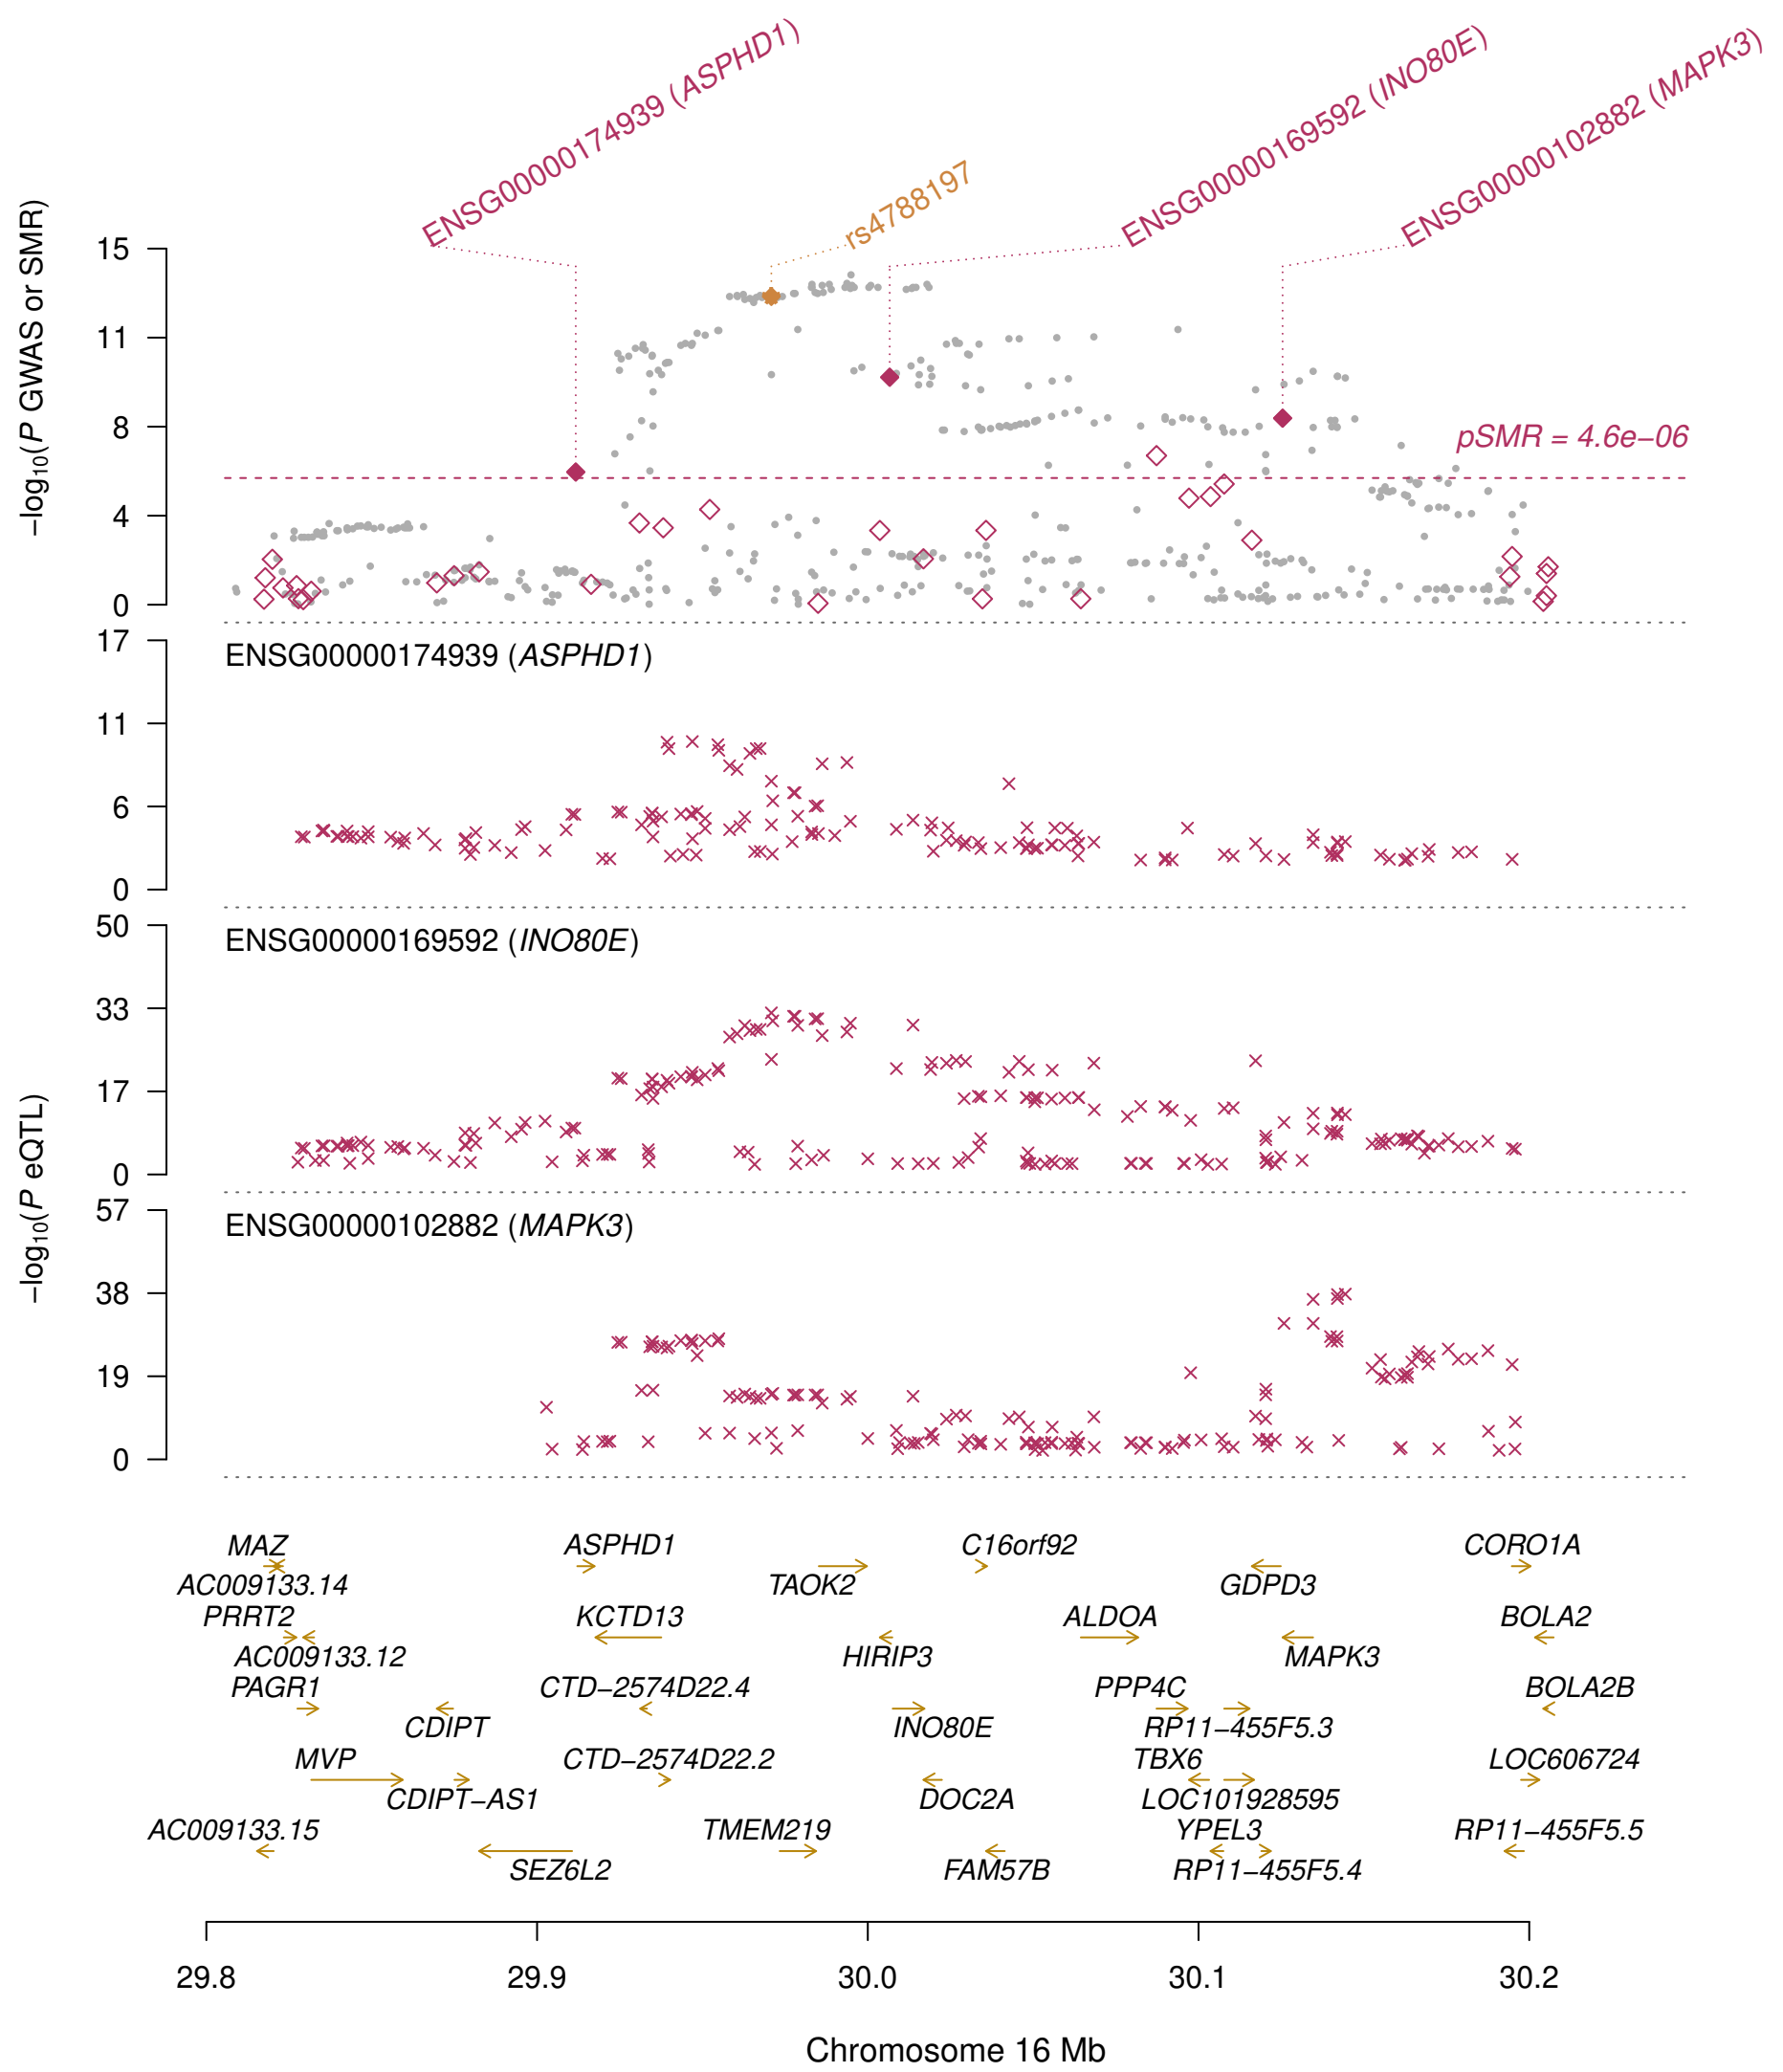

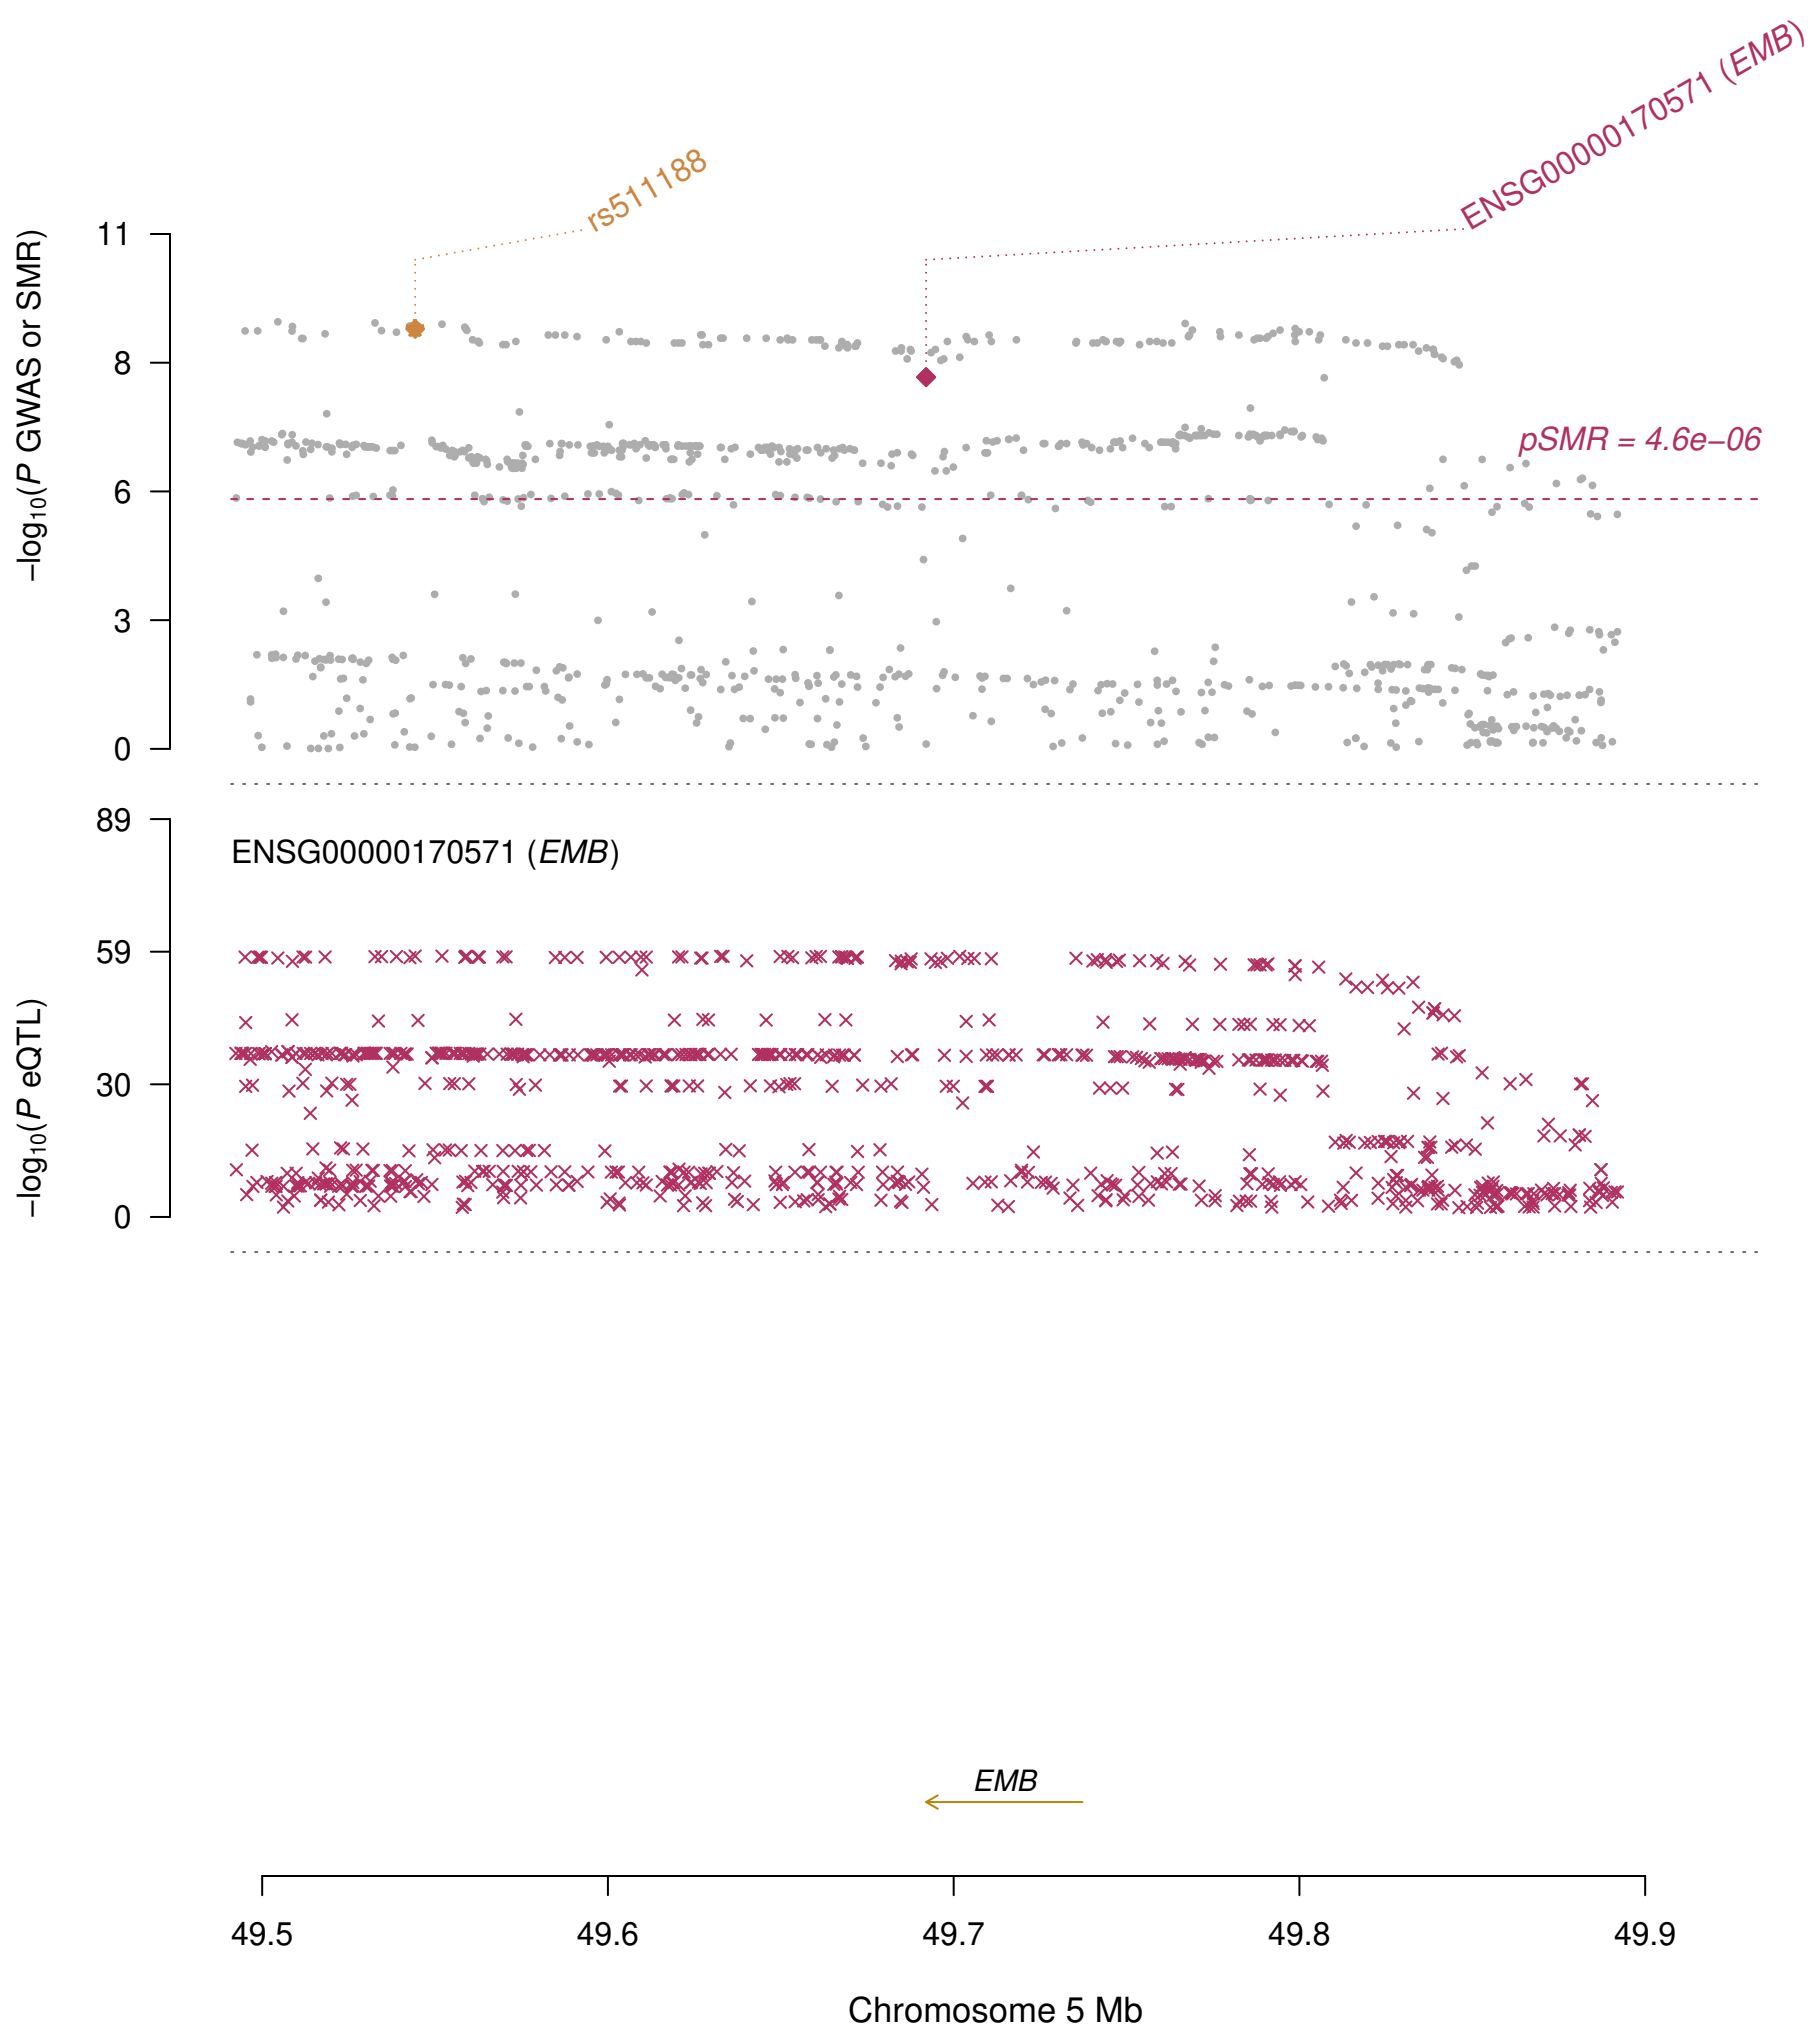

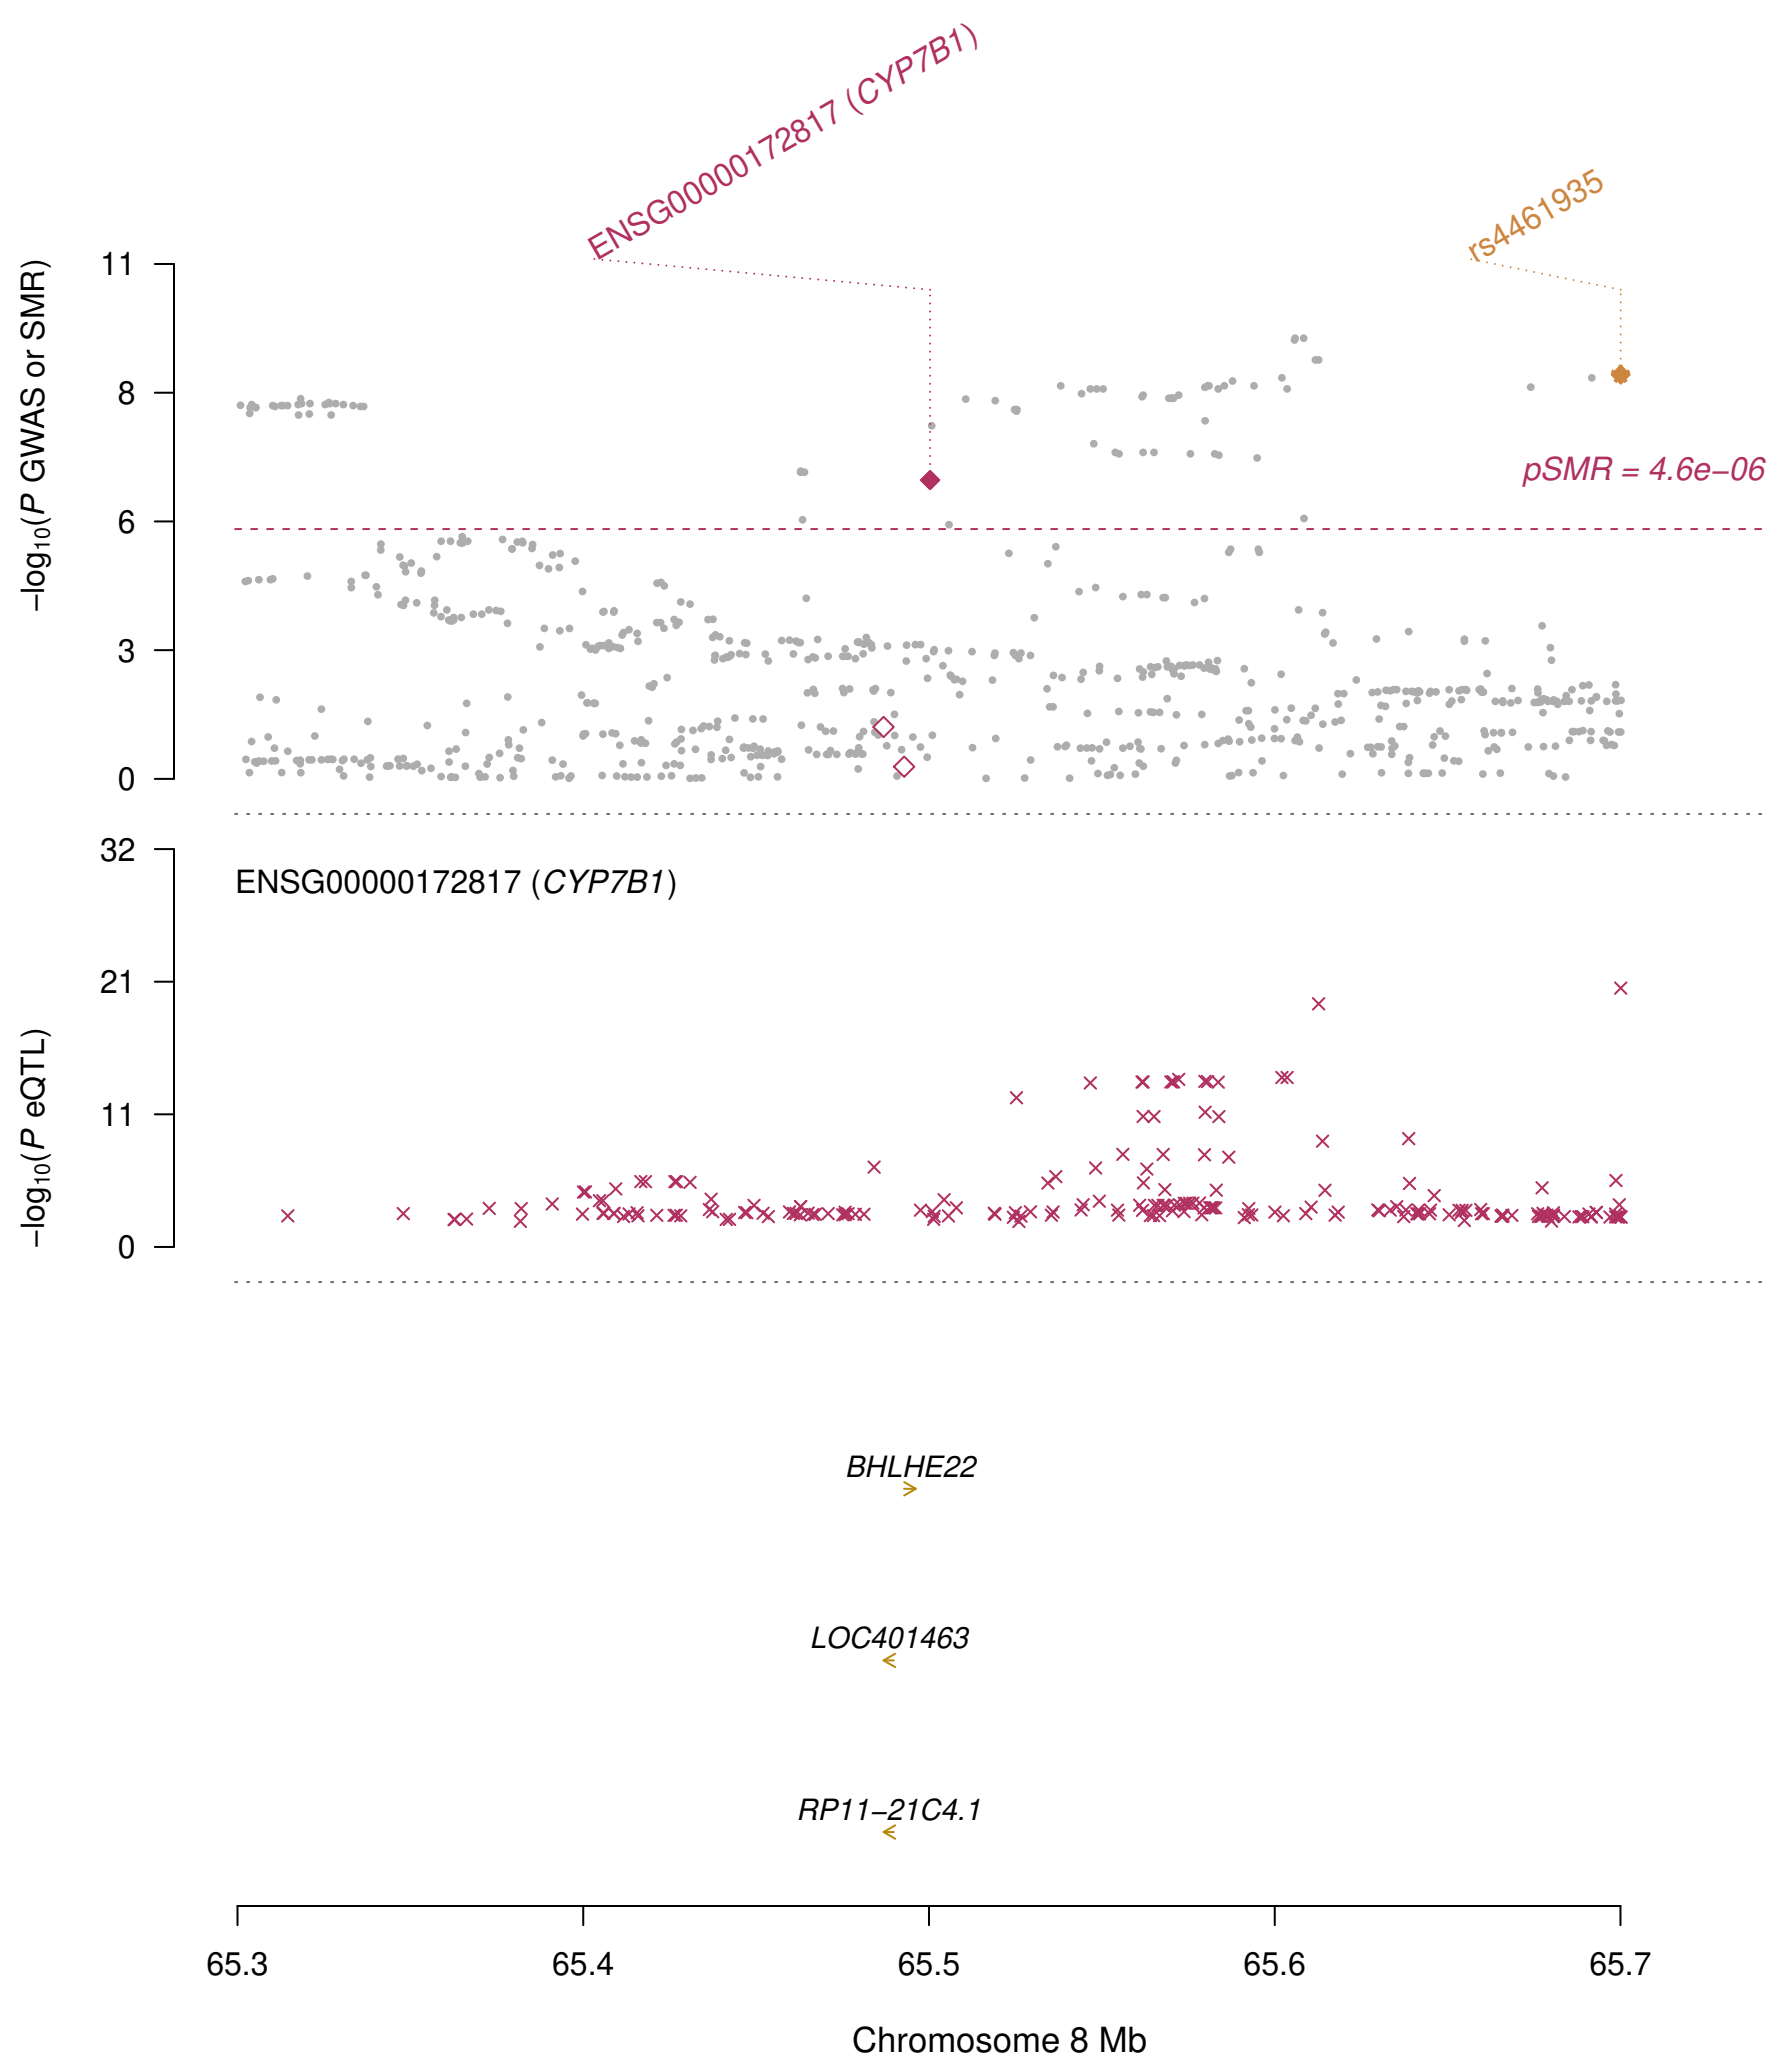

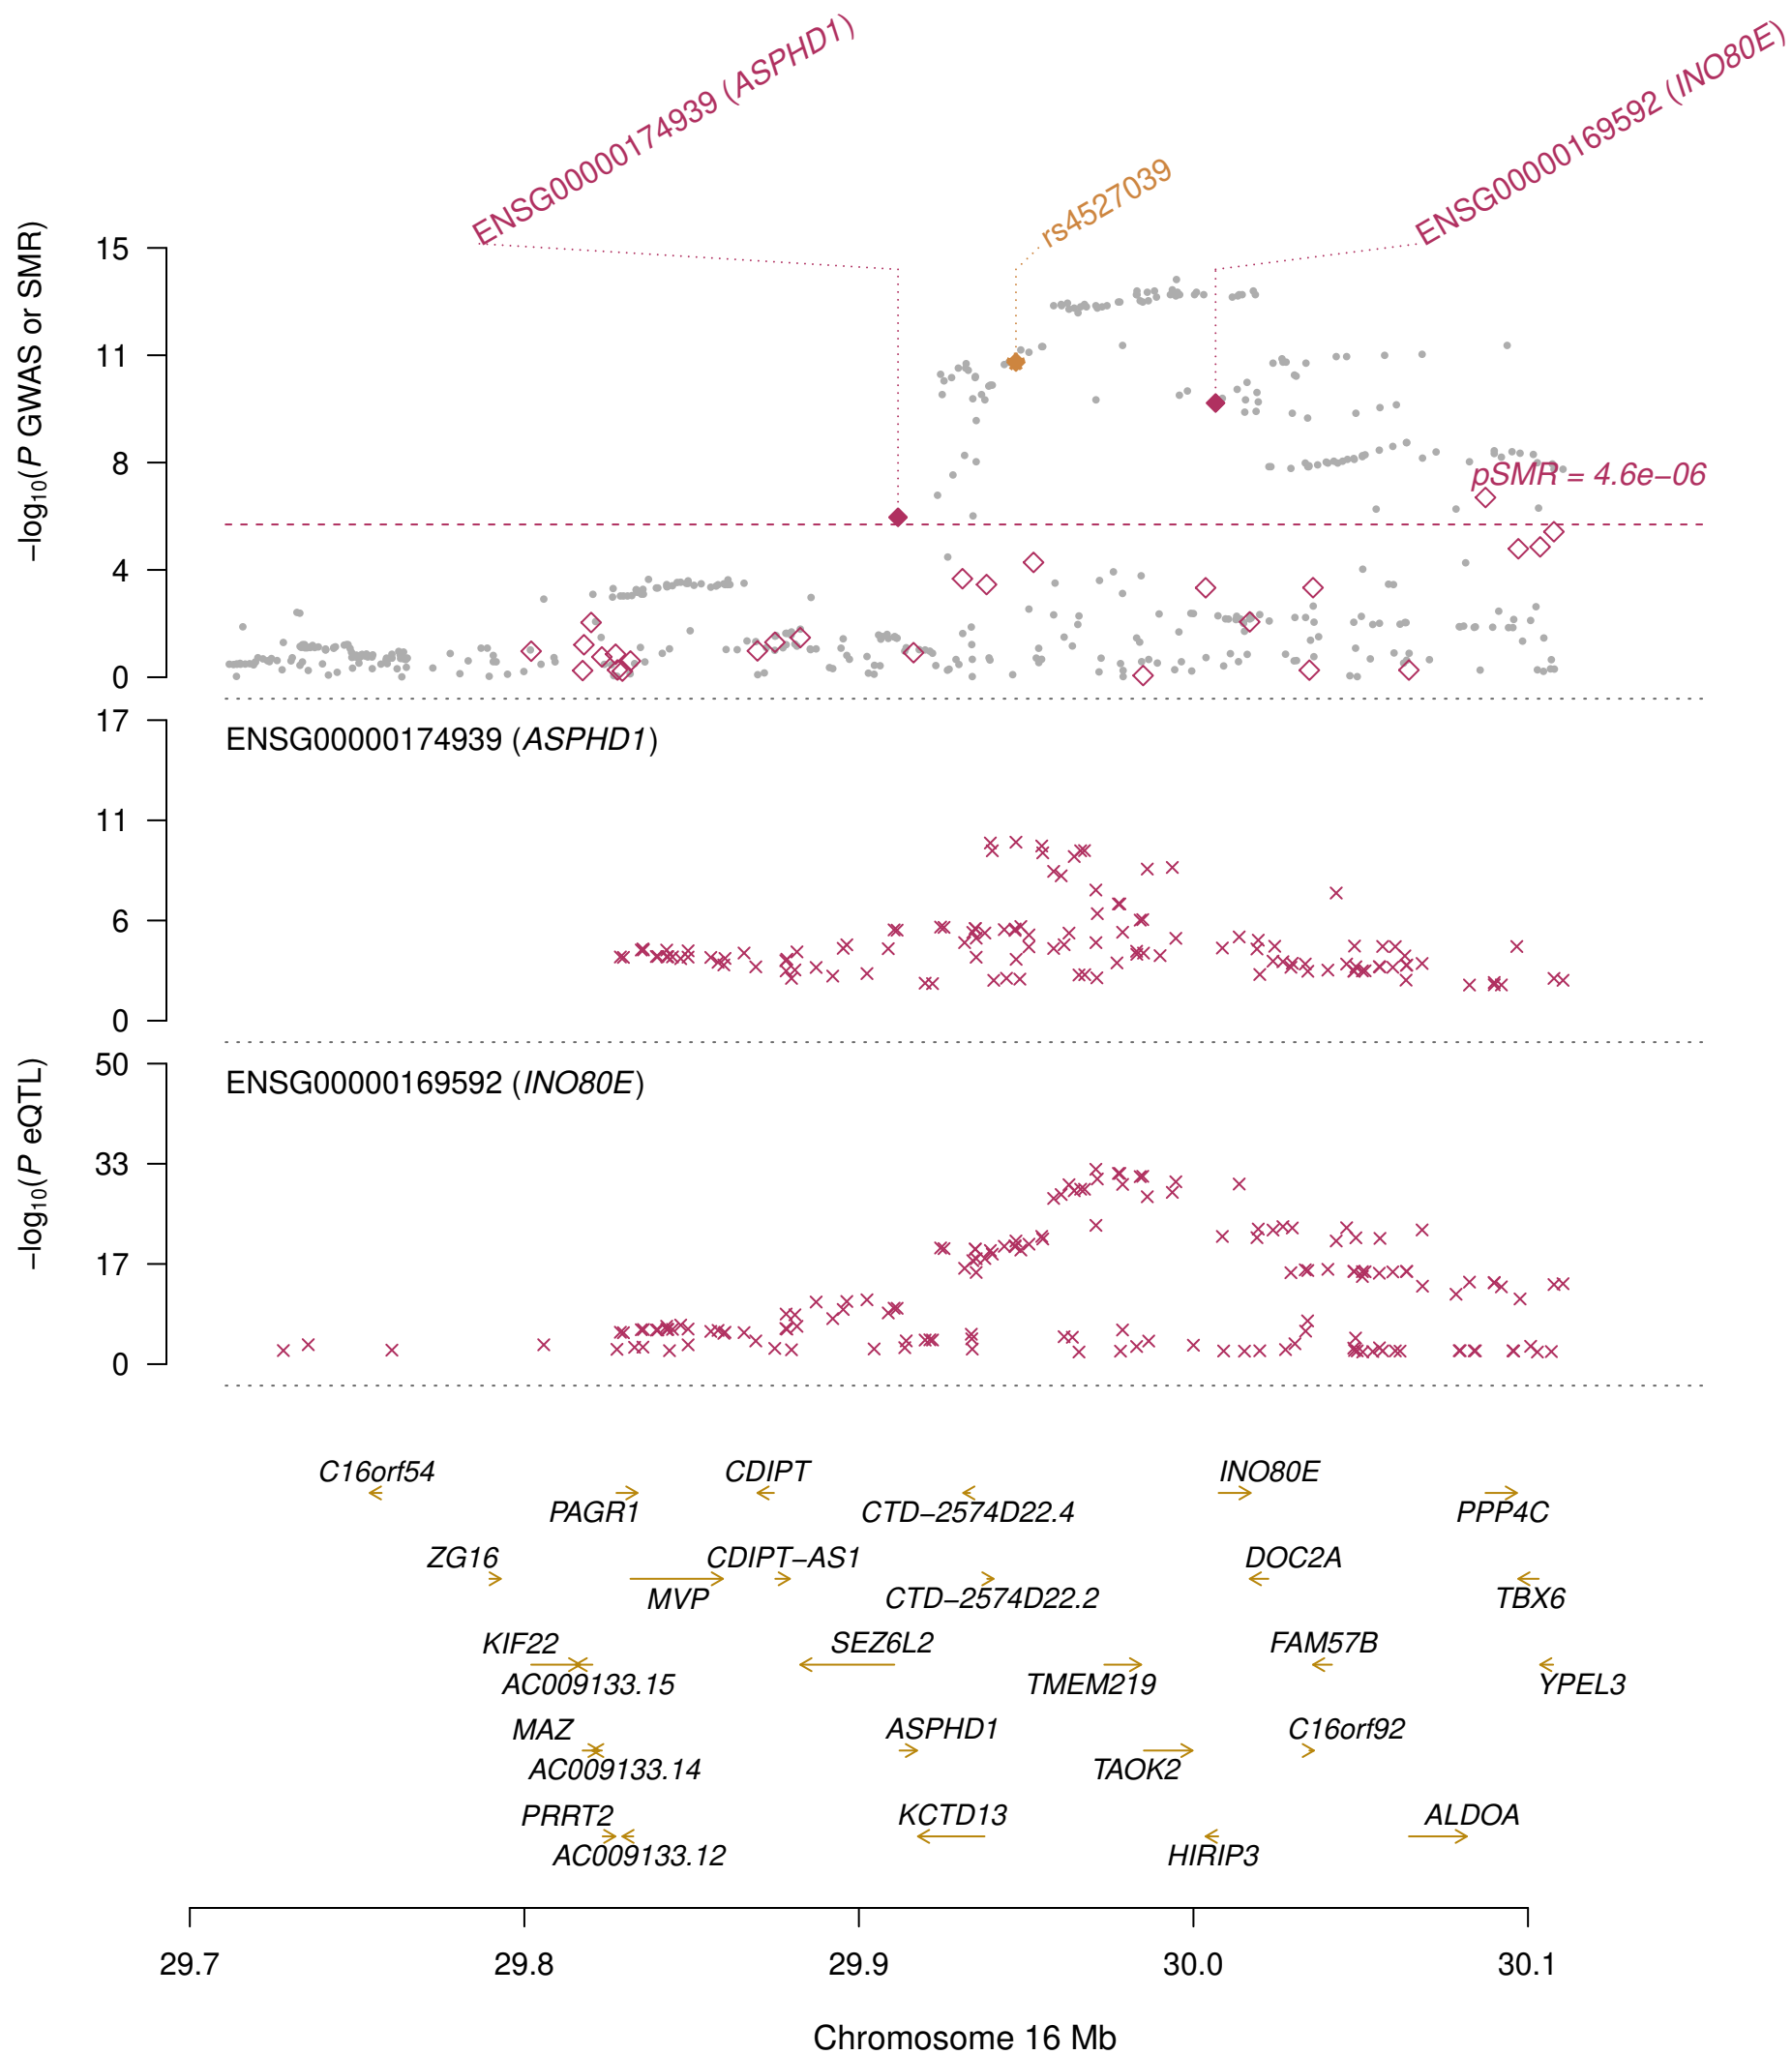

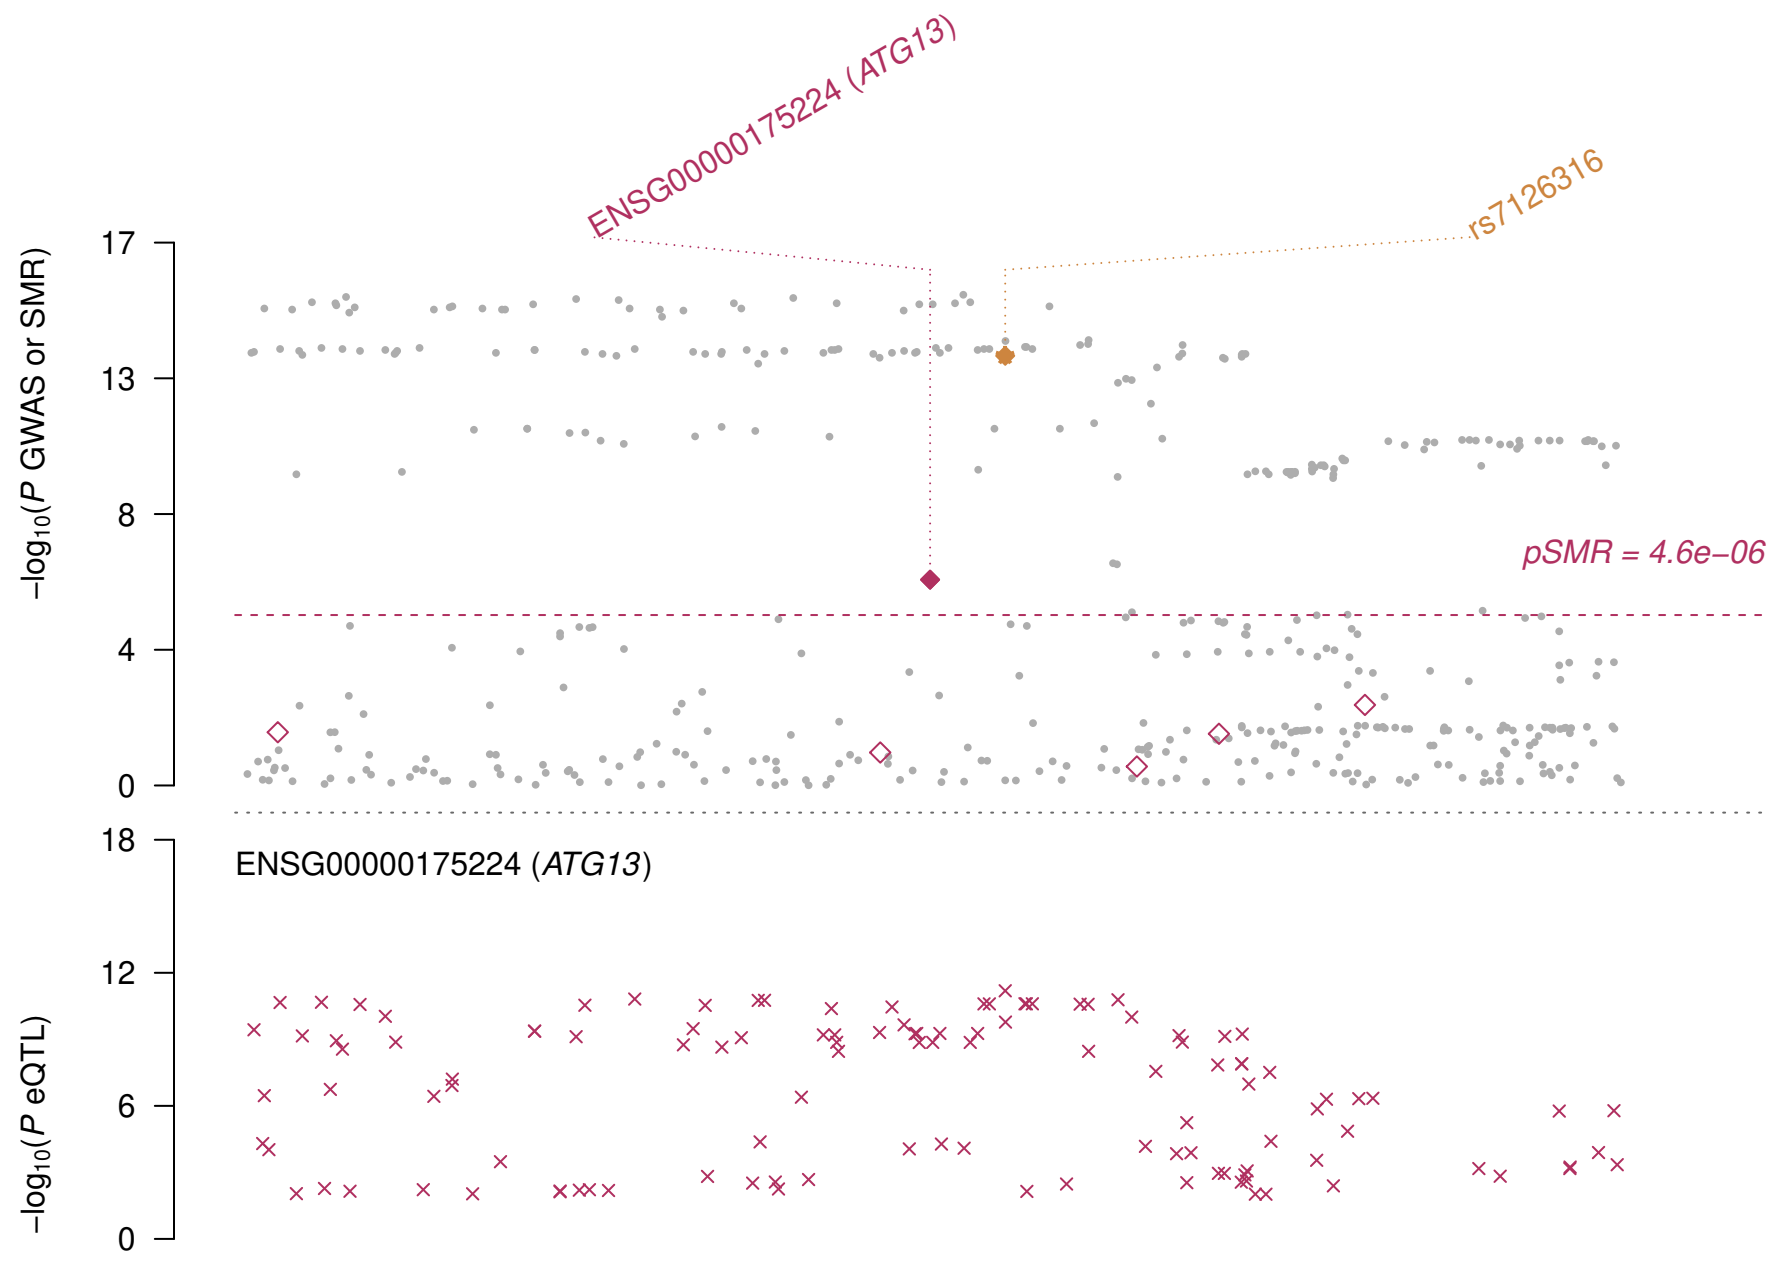

*RP11-425L10.1*  
←

←  
*HARBI1*

*MIR5582*  
←

*MIR3160-1*  
←

→  
*ATG13*

*SNORD67*  
←

*MIR3160-2*  
→

←  
*ARHGAP1*

*ZNF408*  
→

→  
*F2*

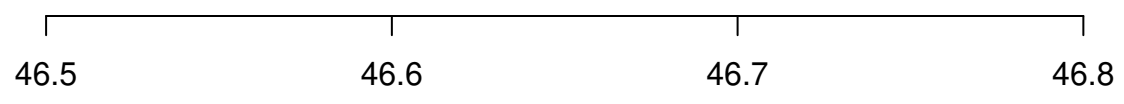

Chromosome 11 Mb

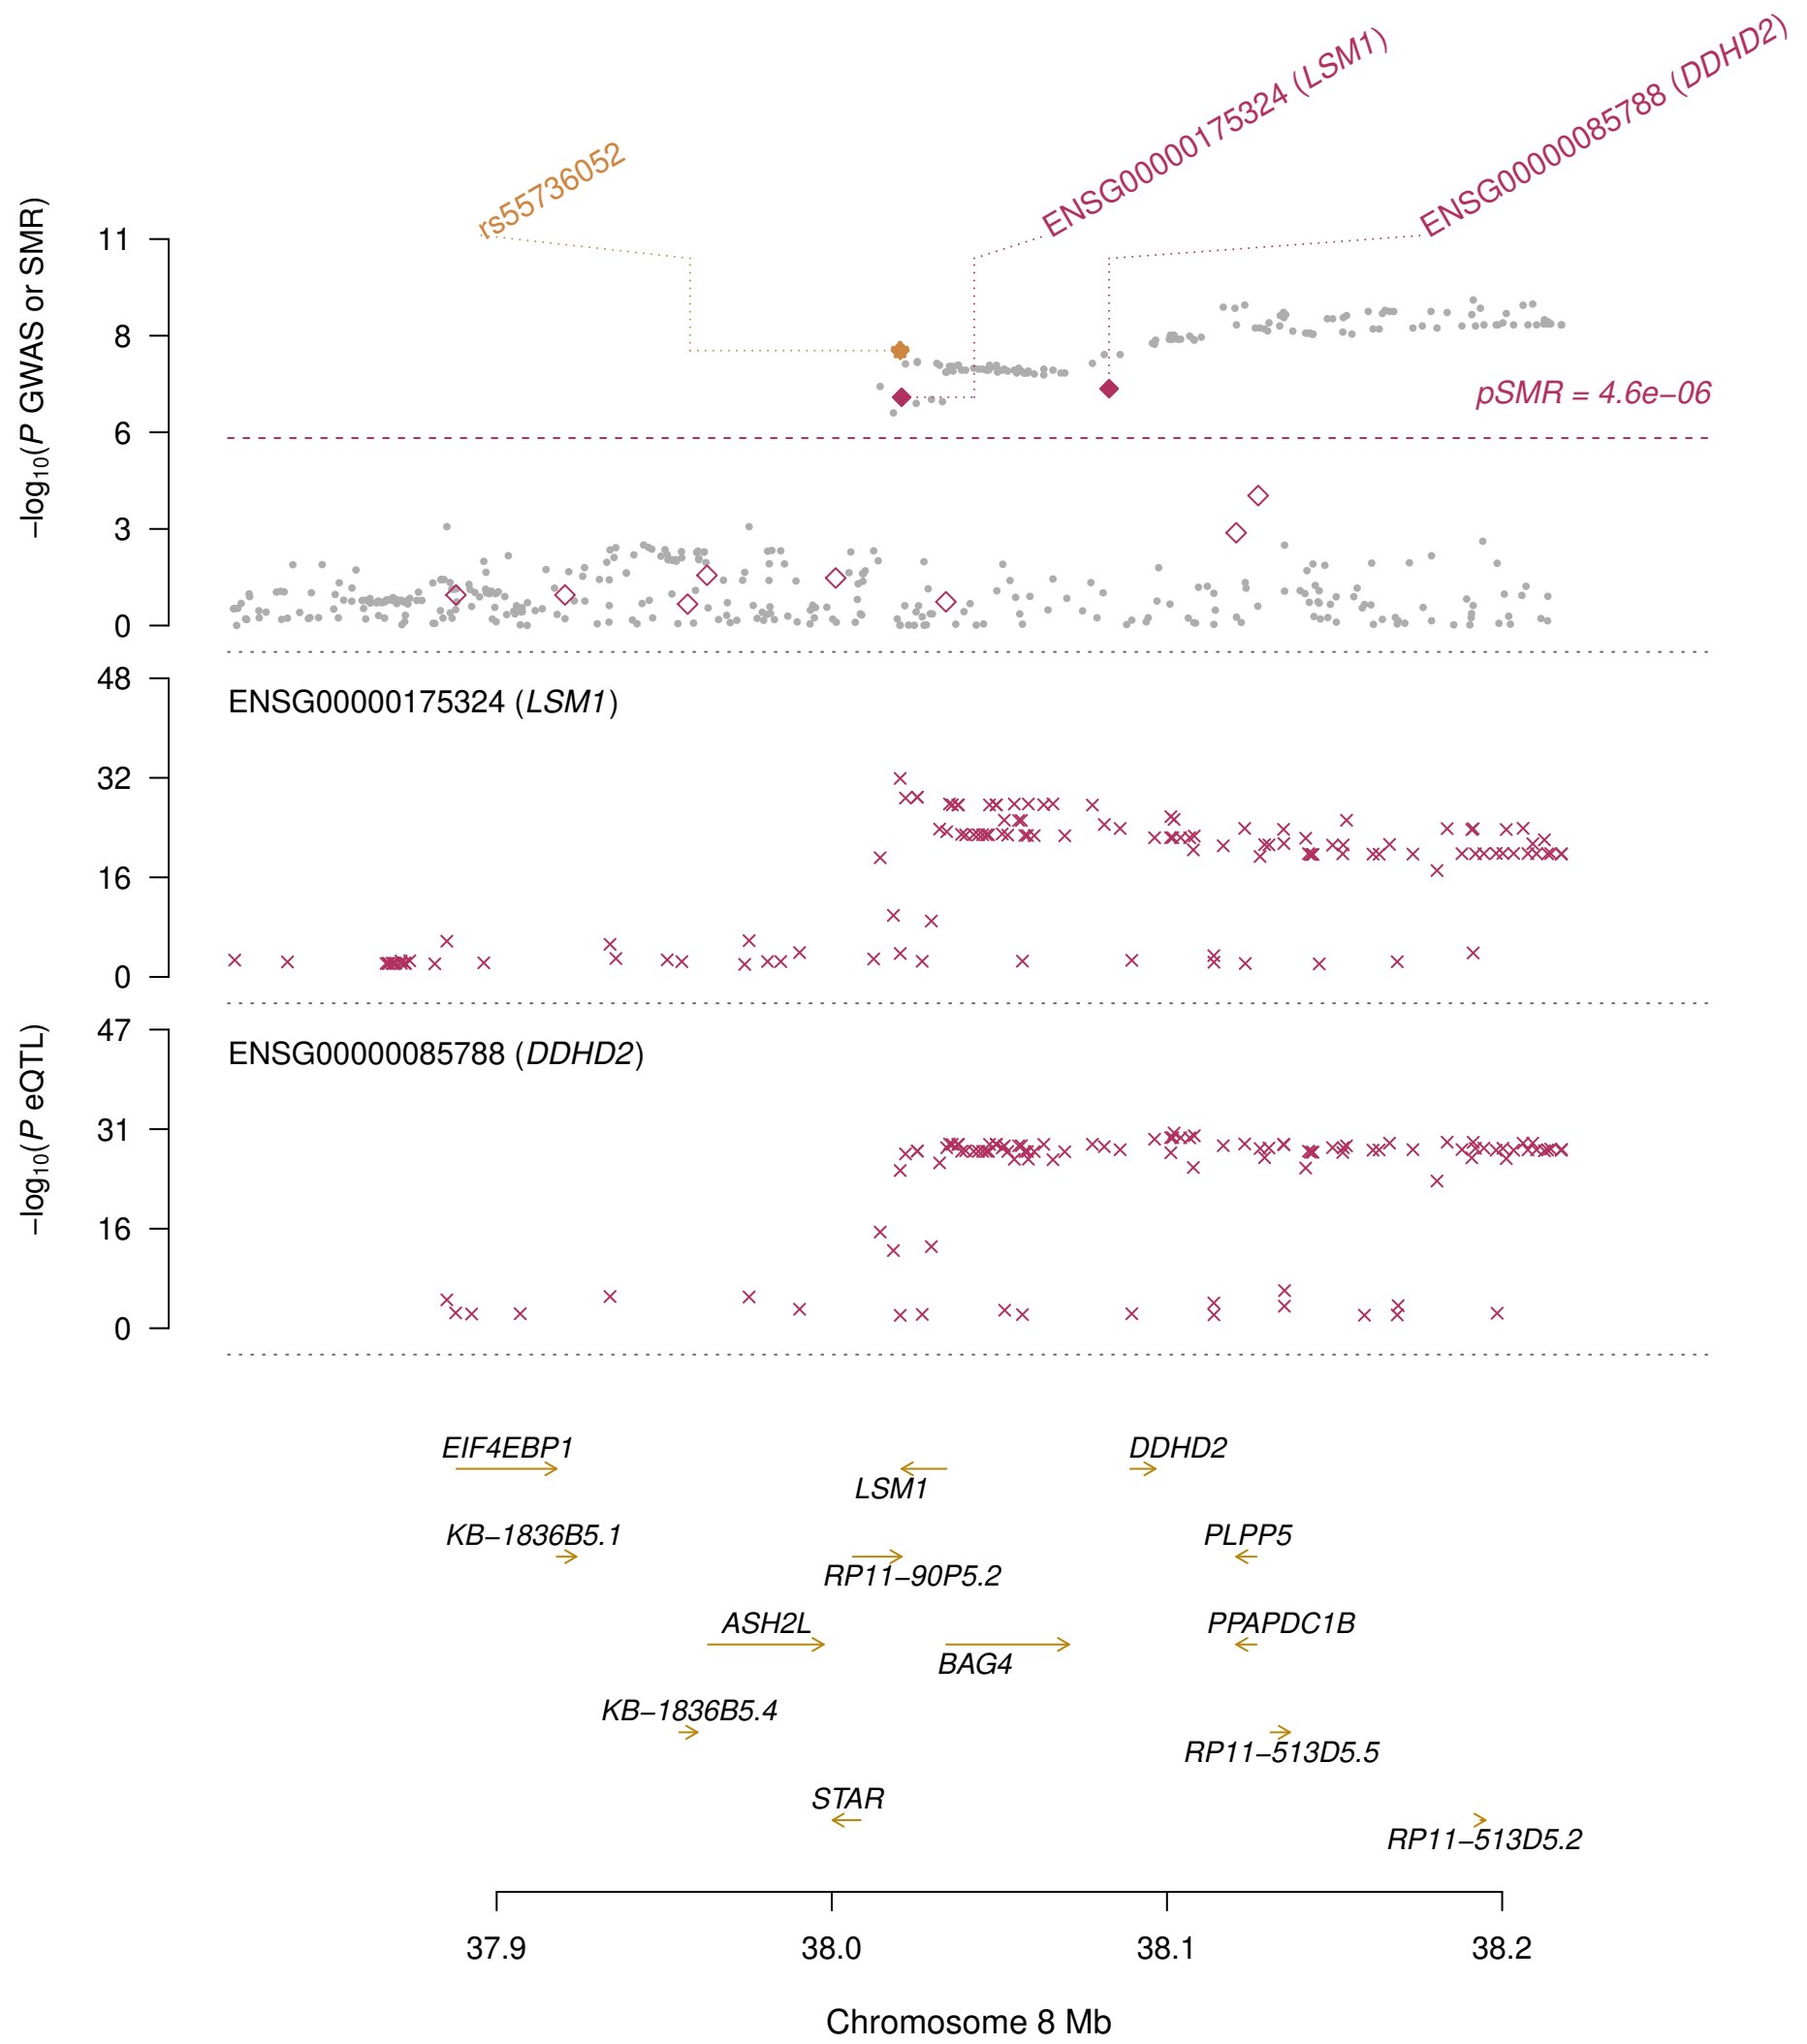



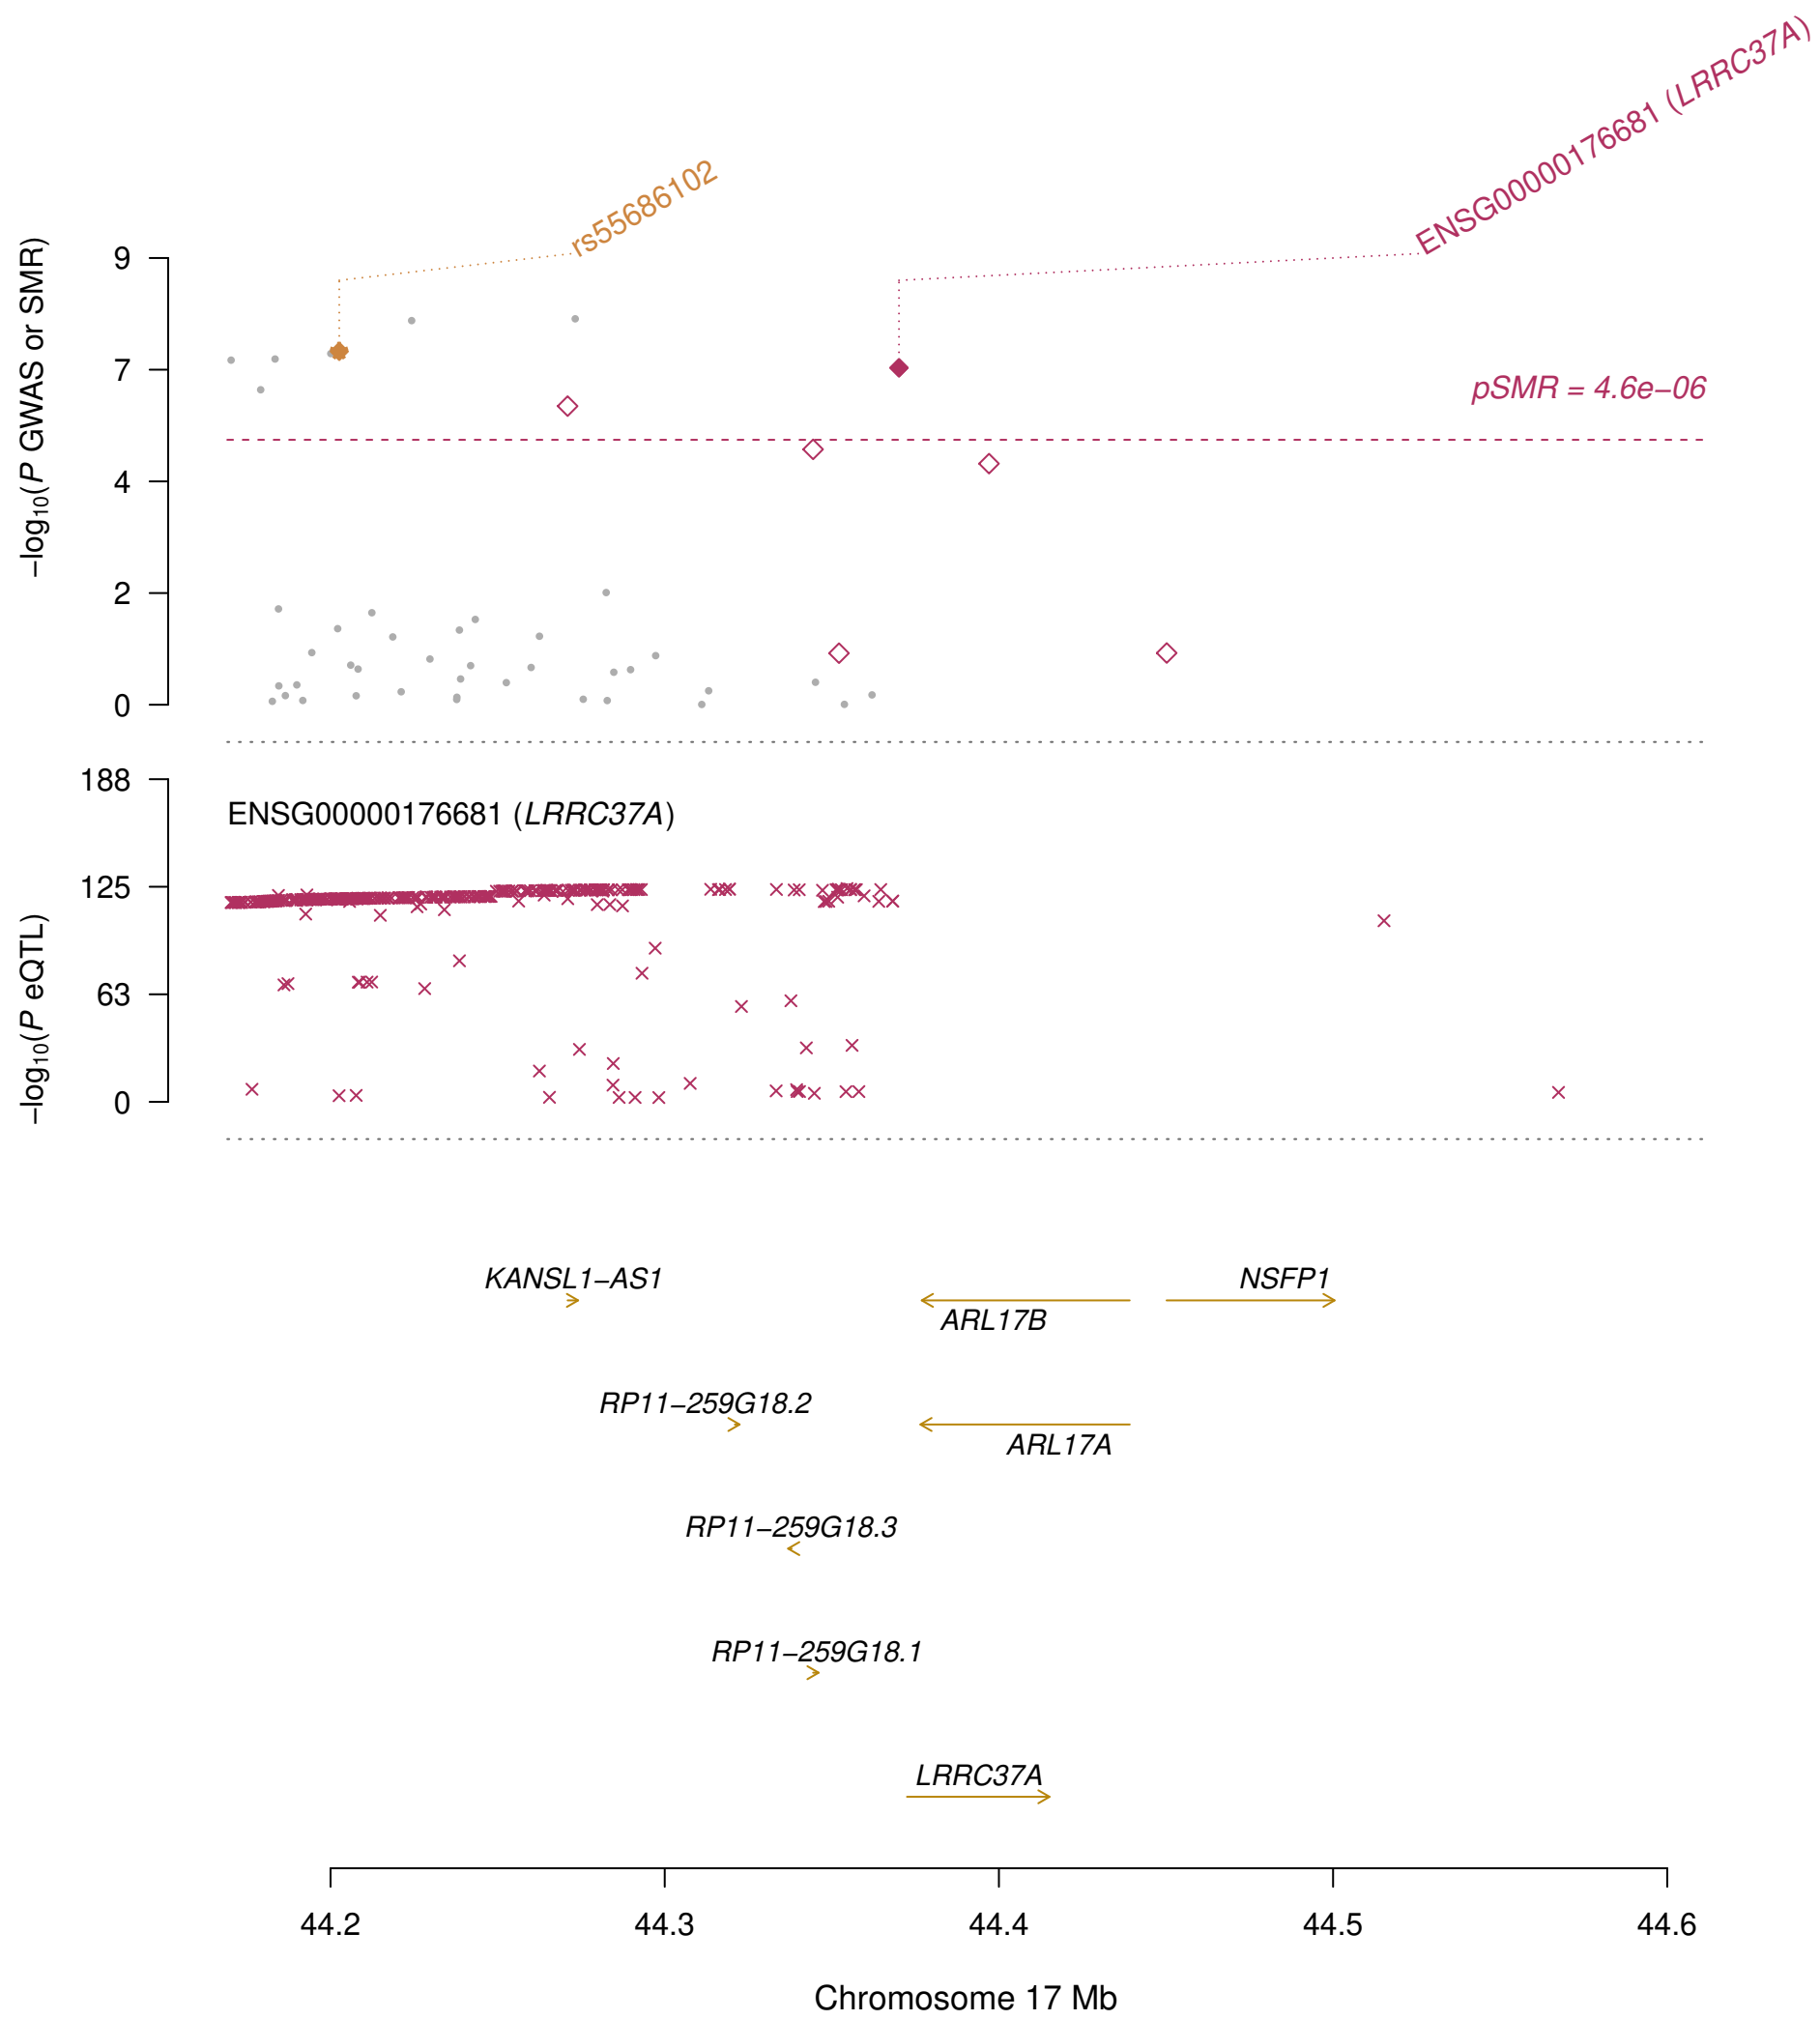

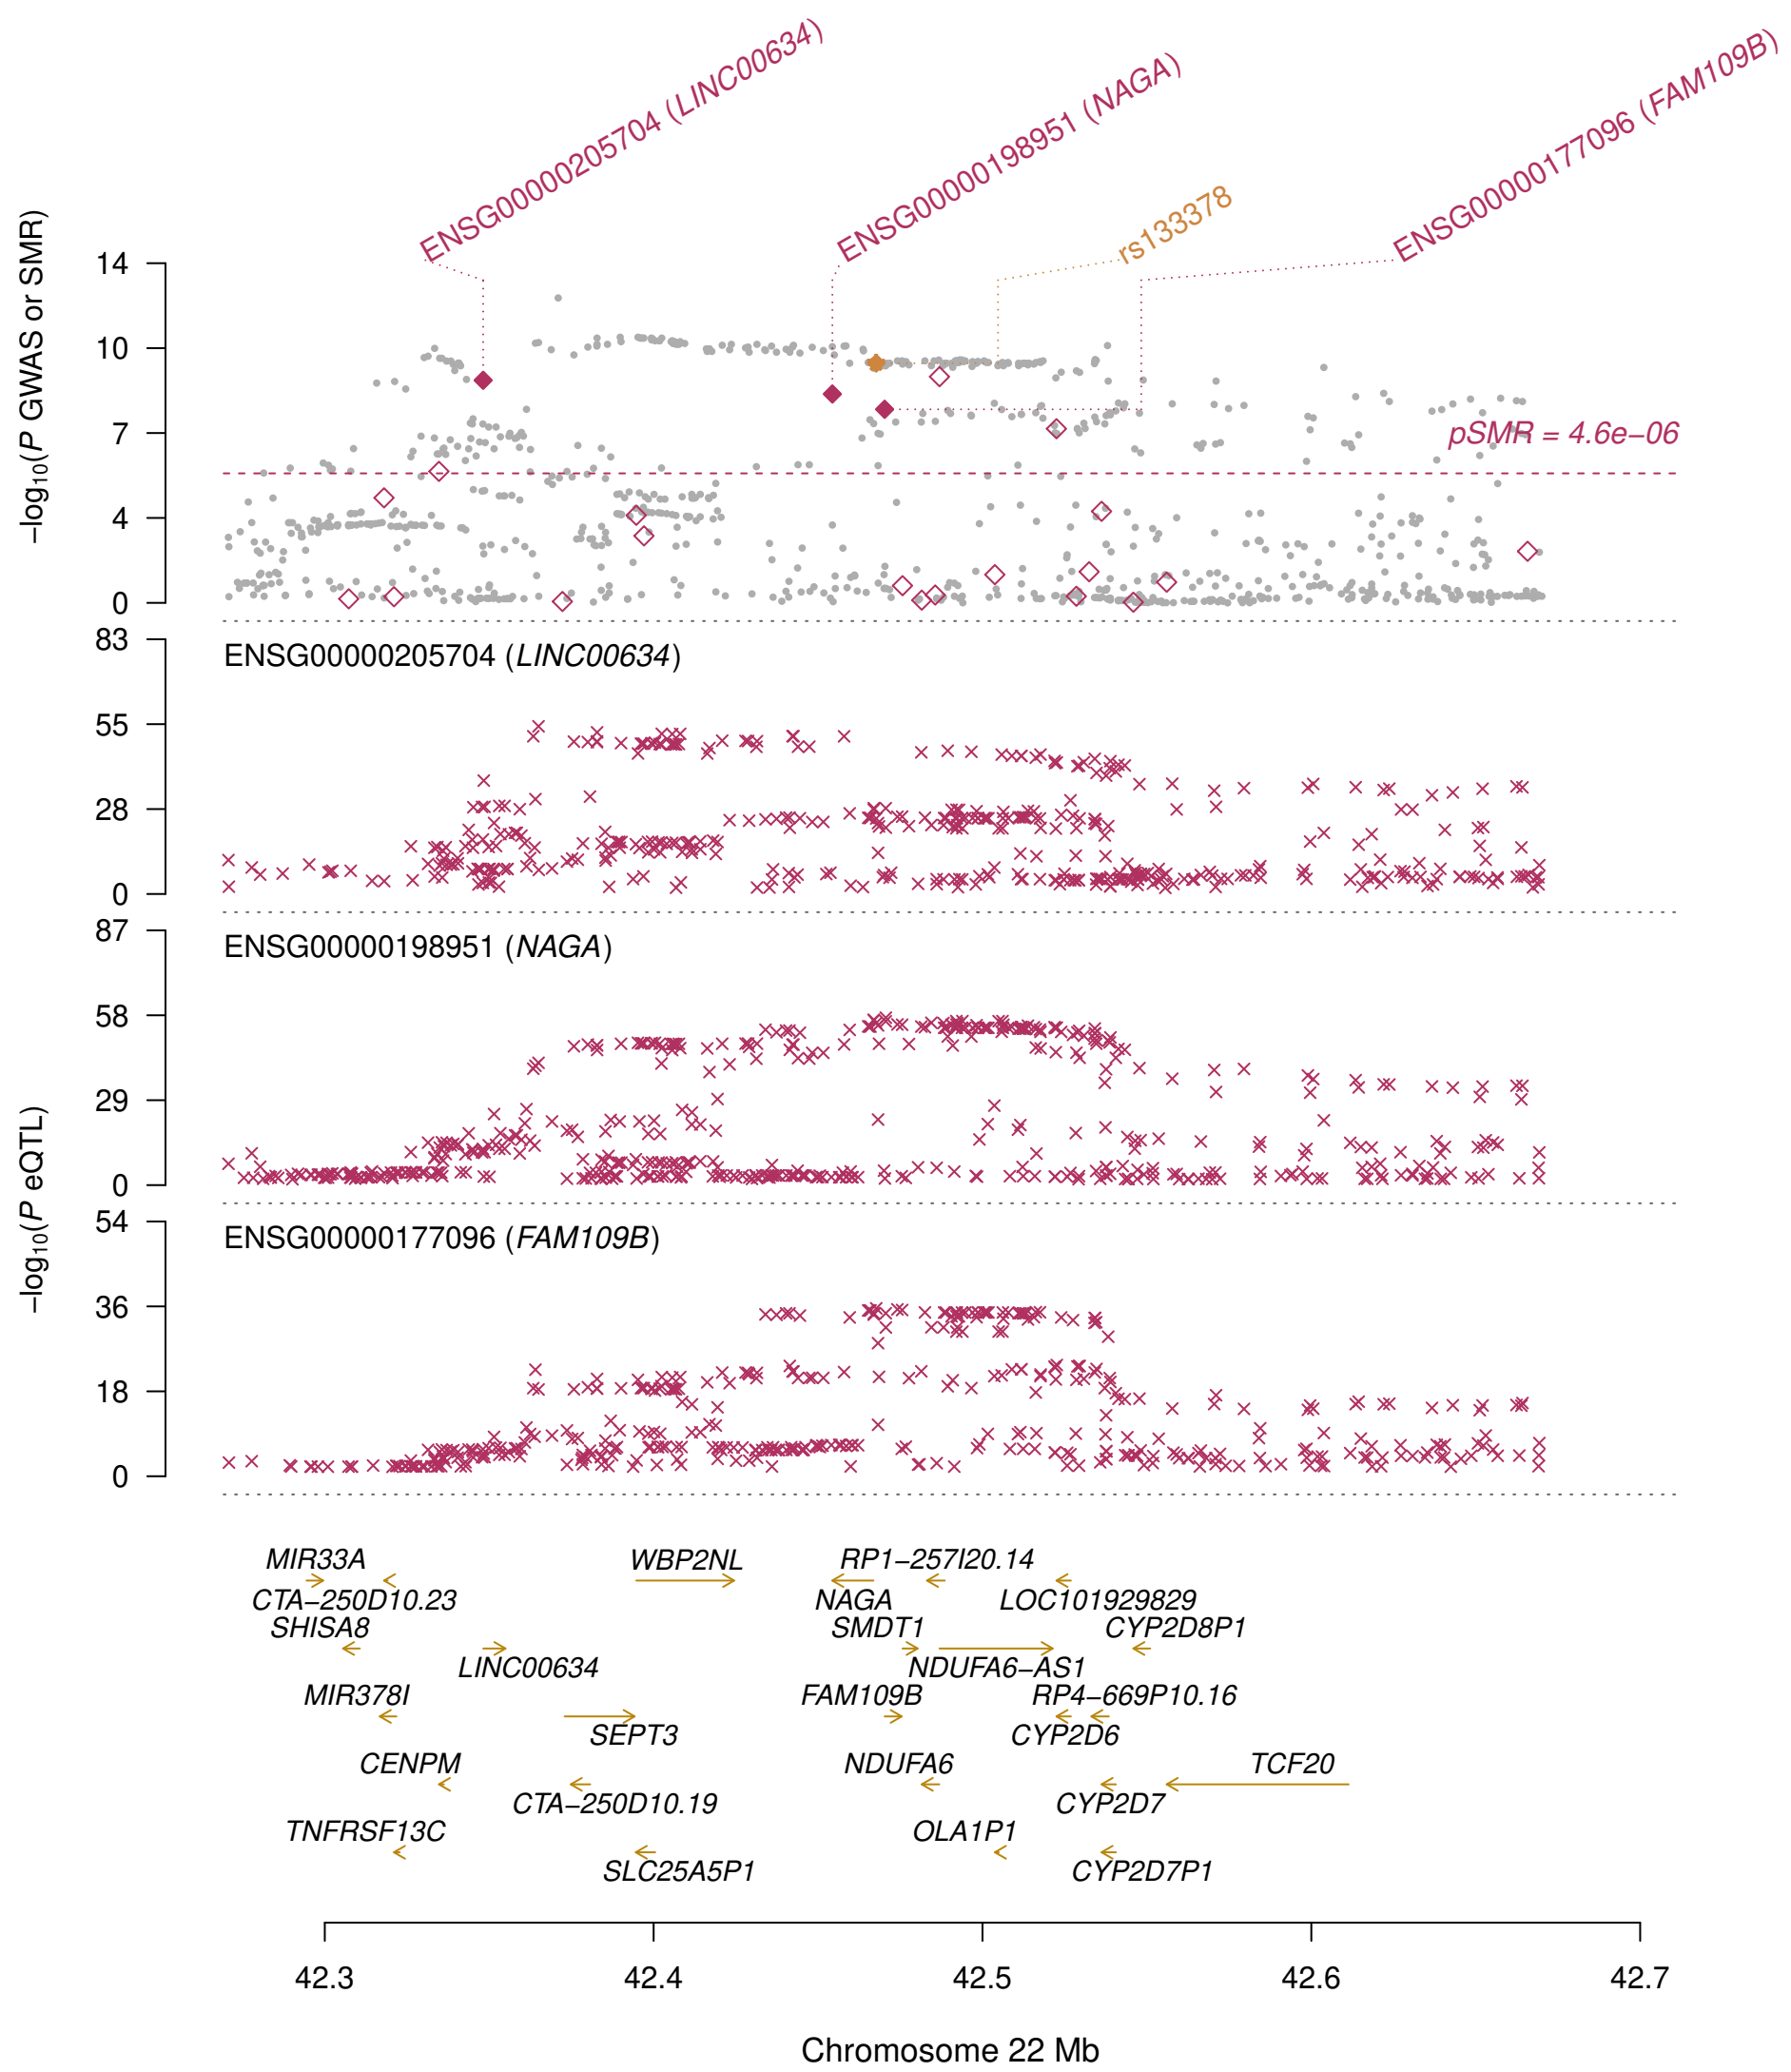

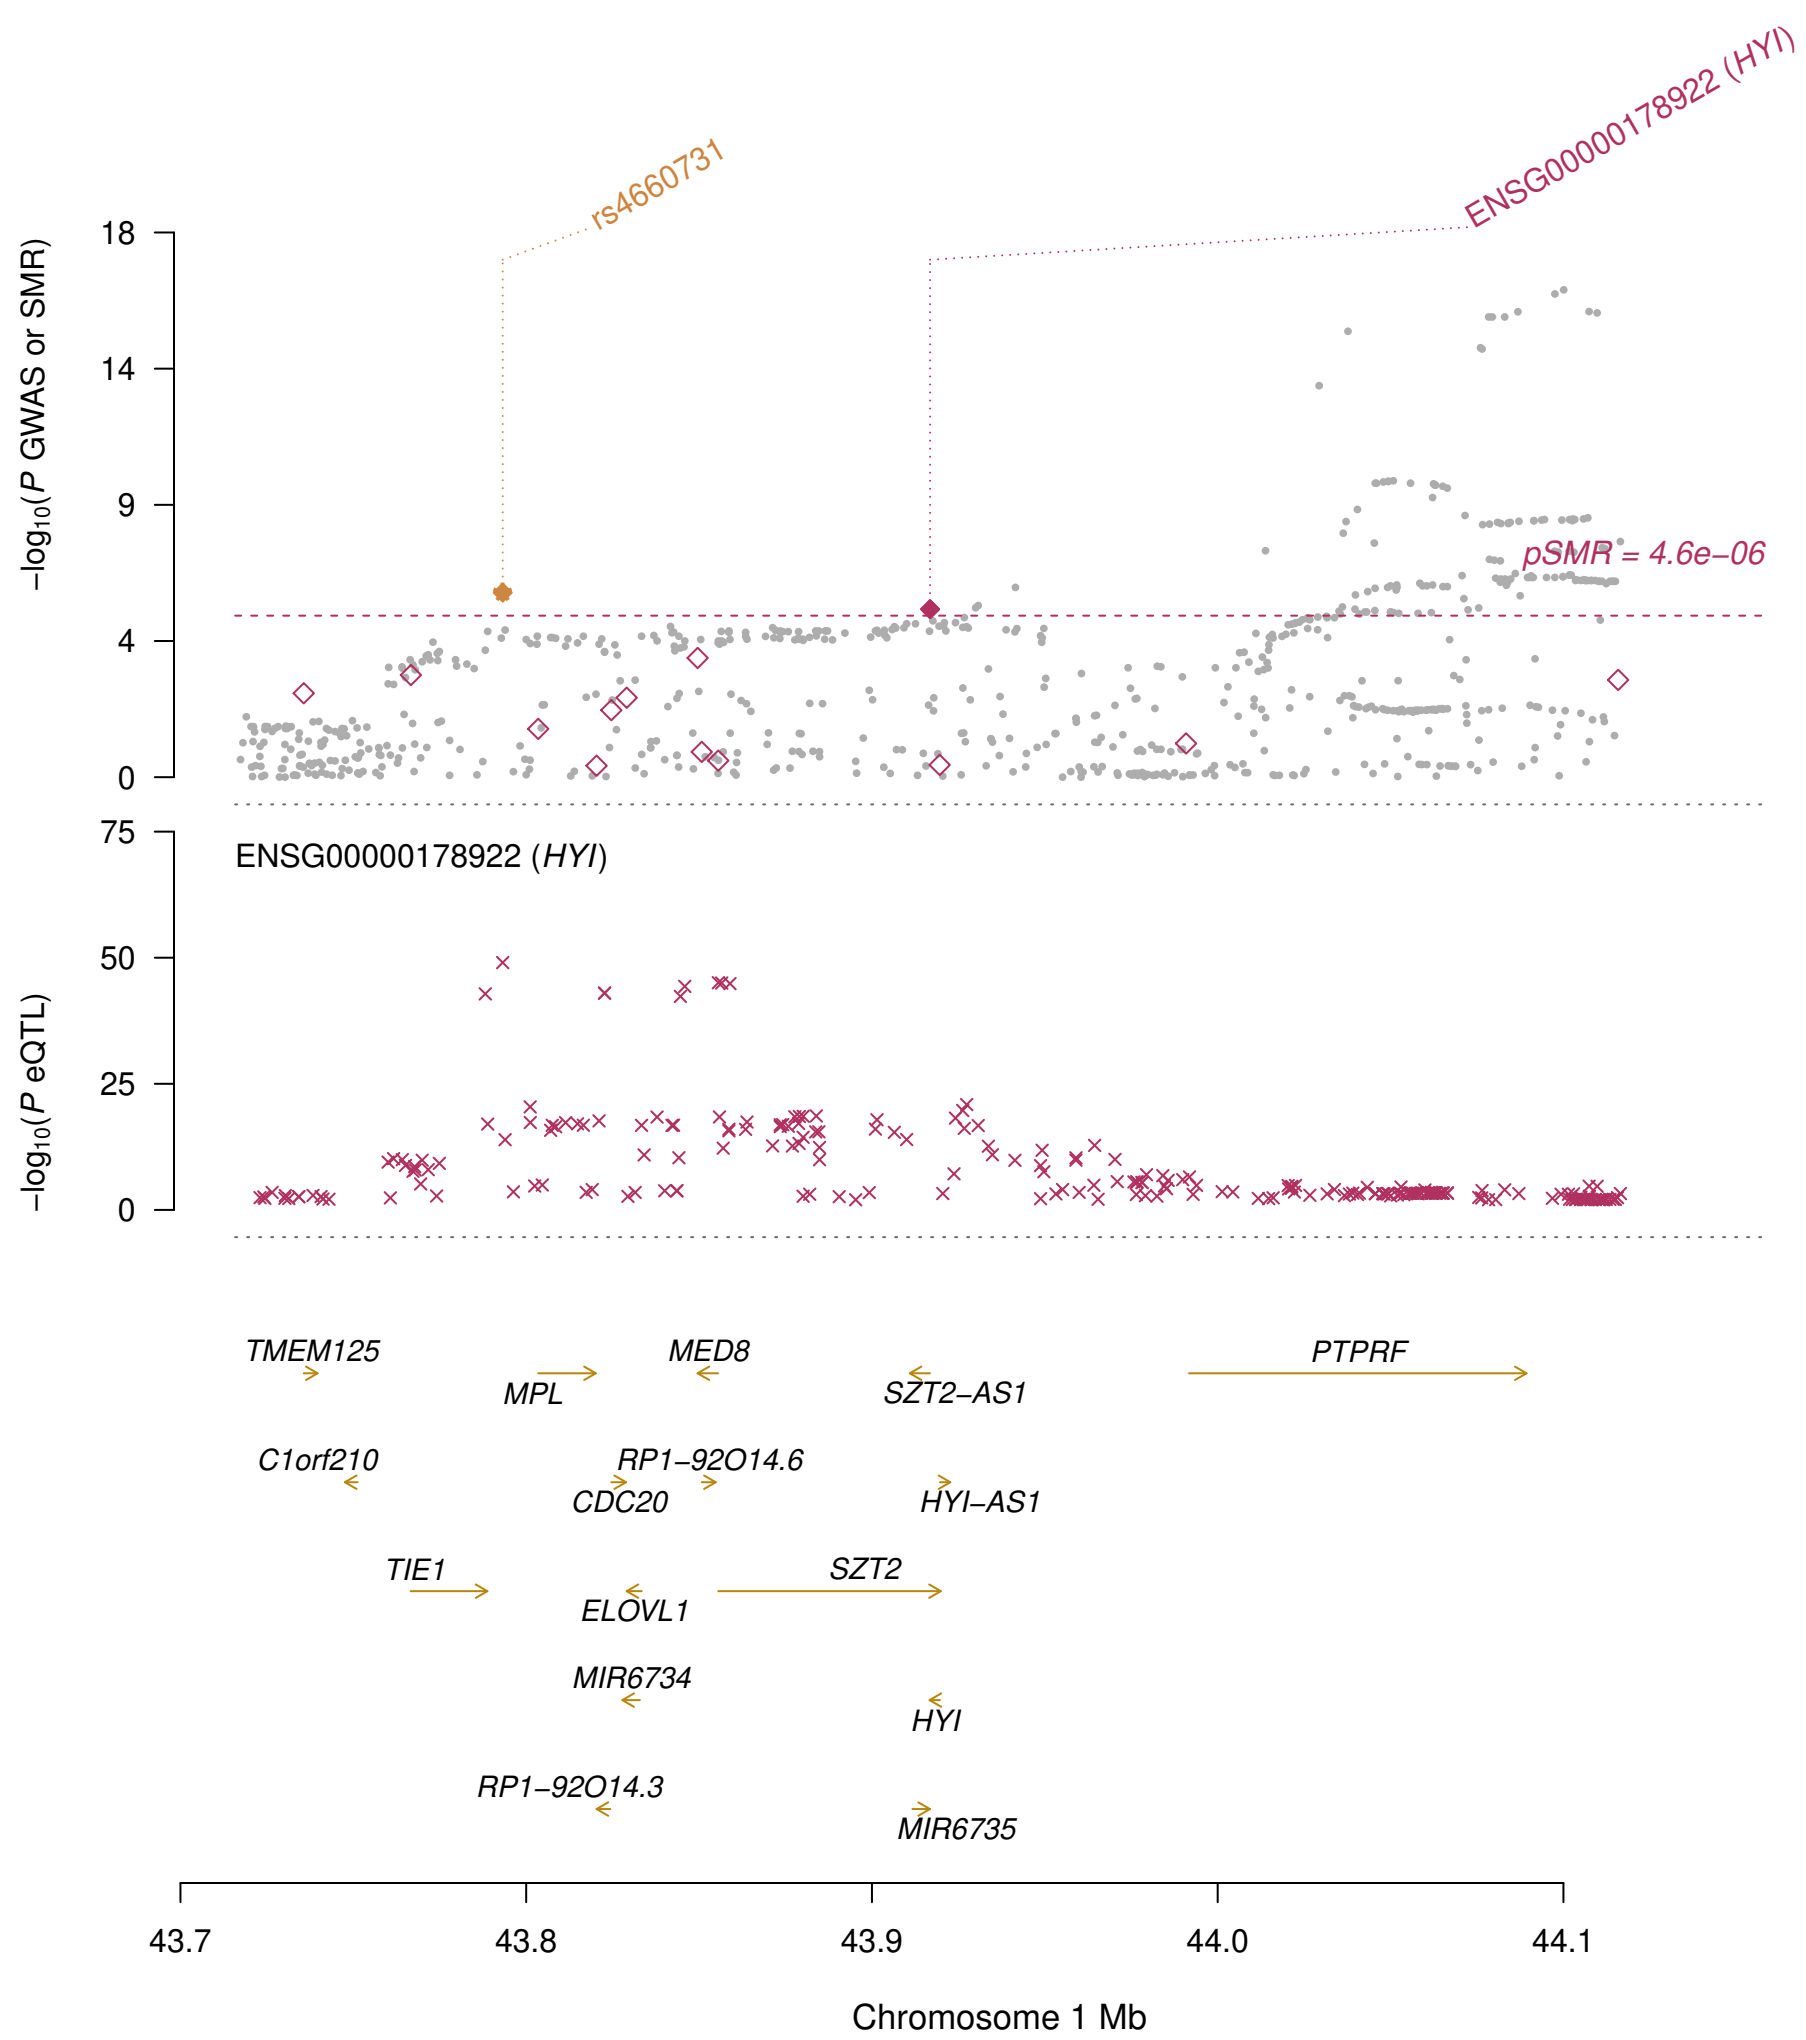

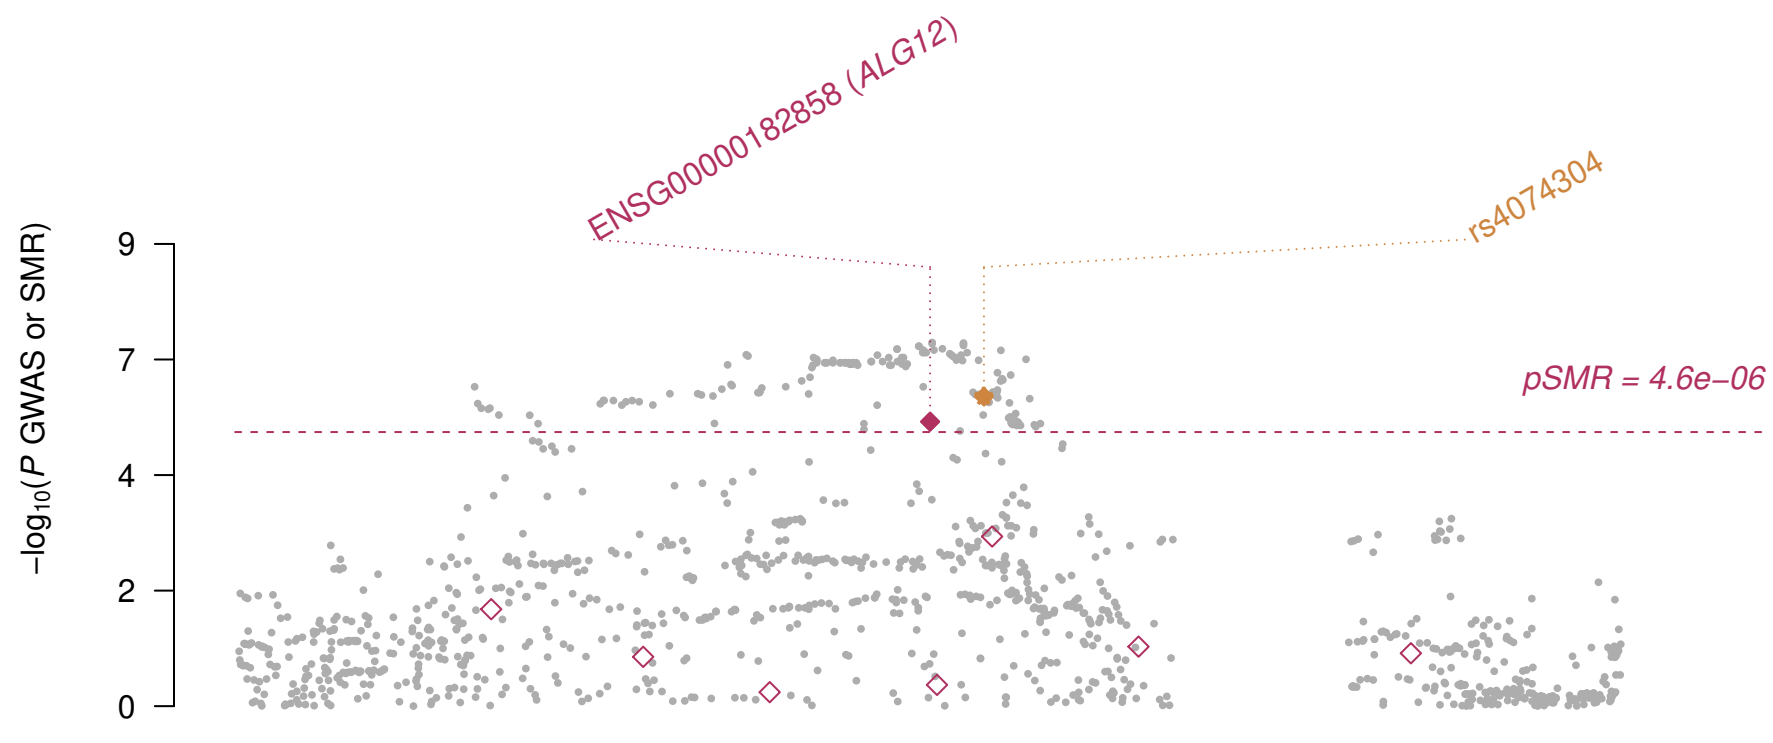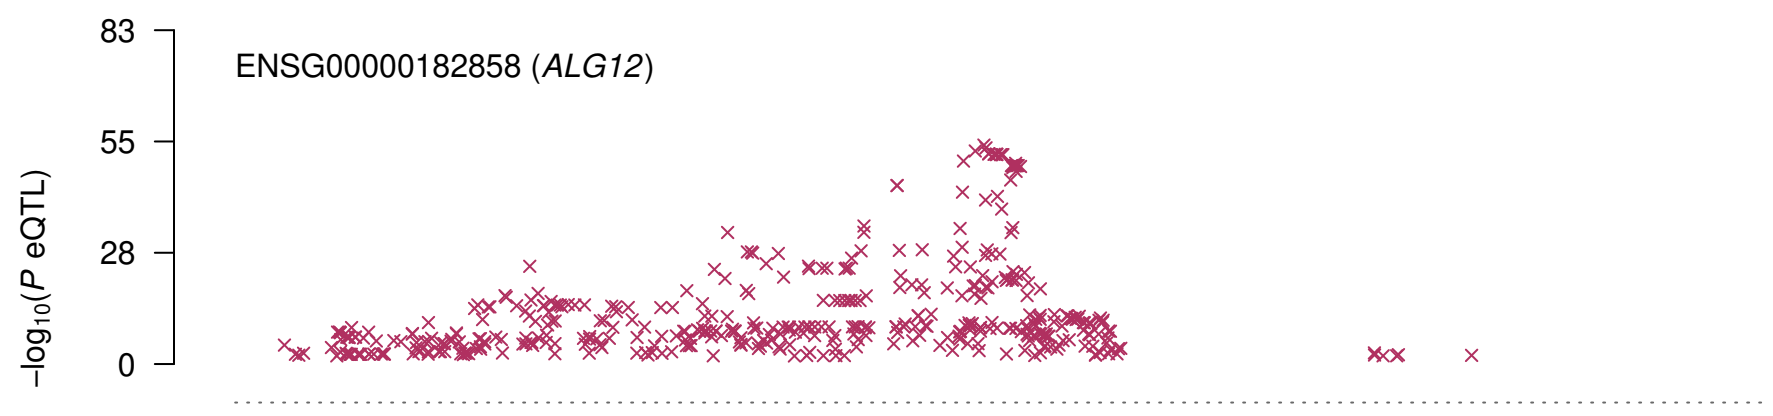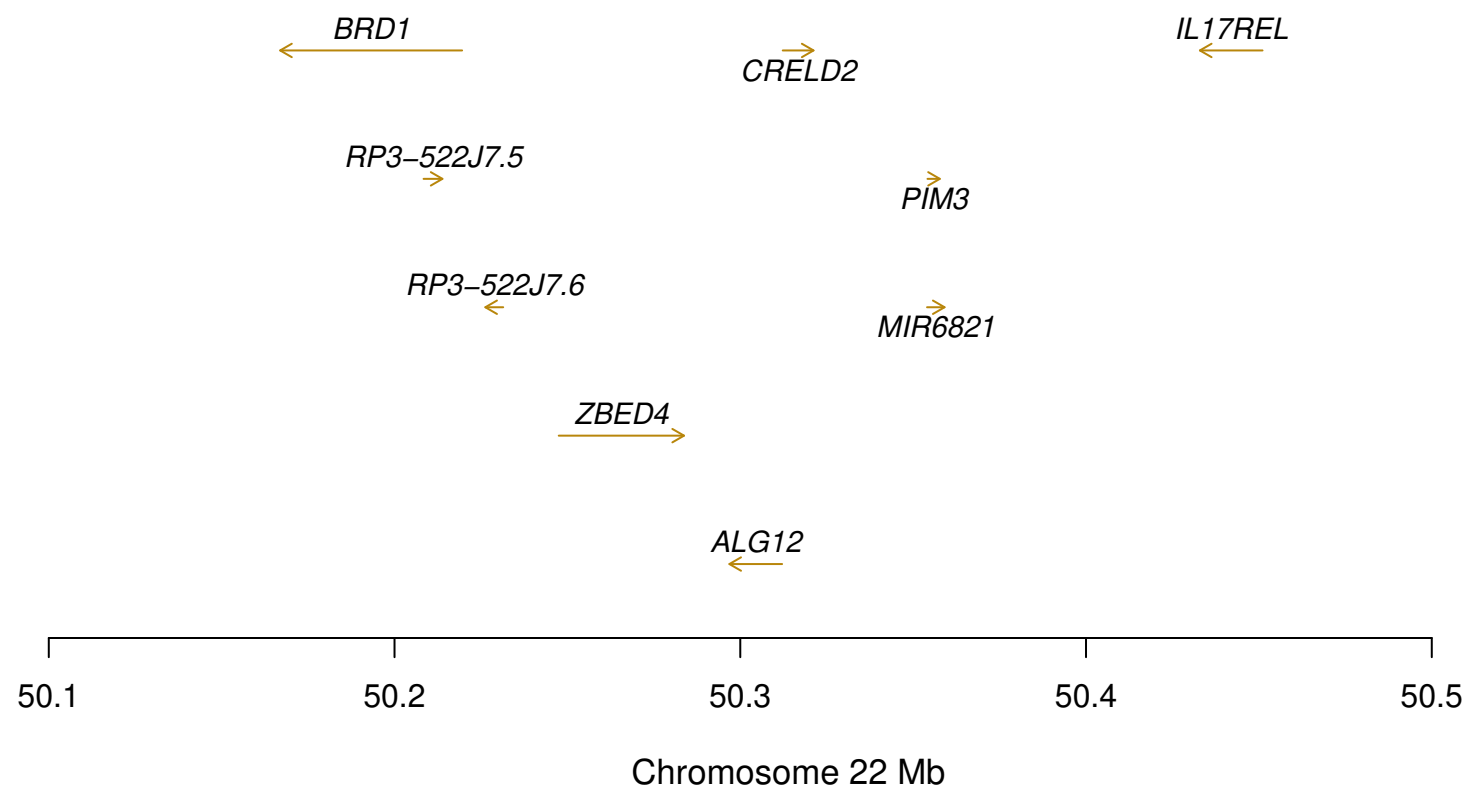

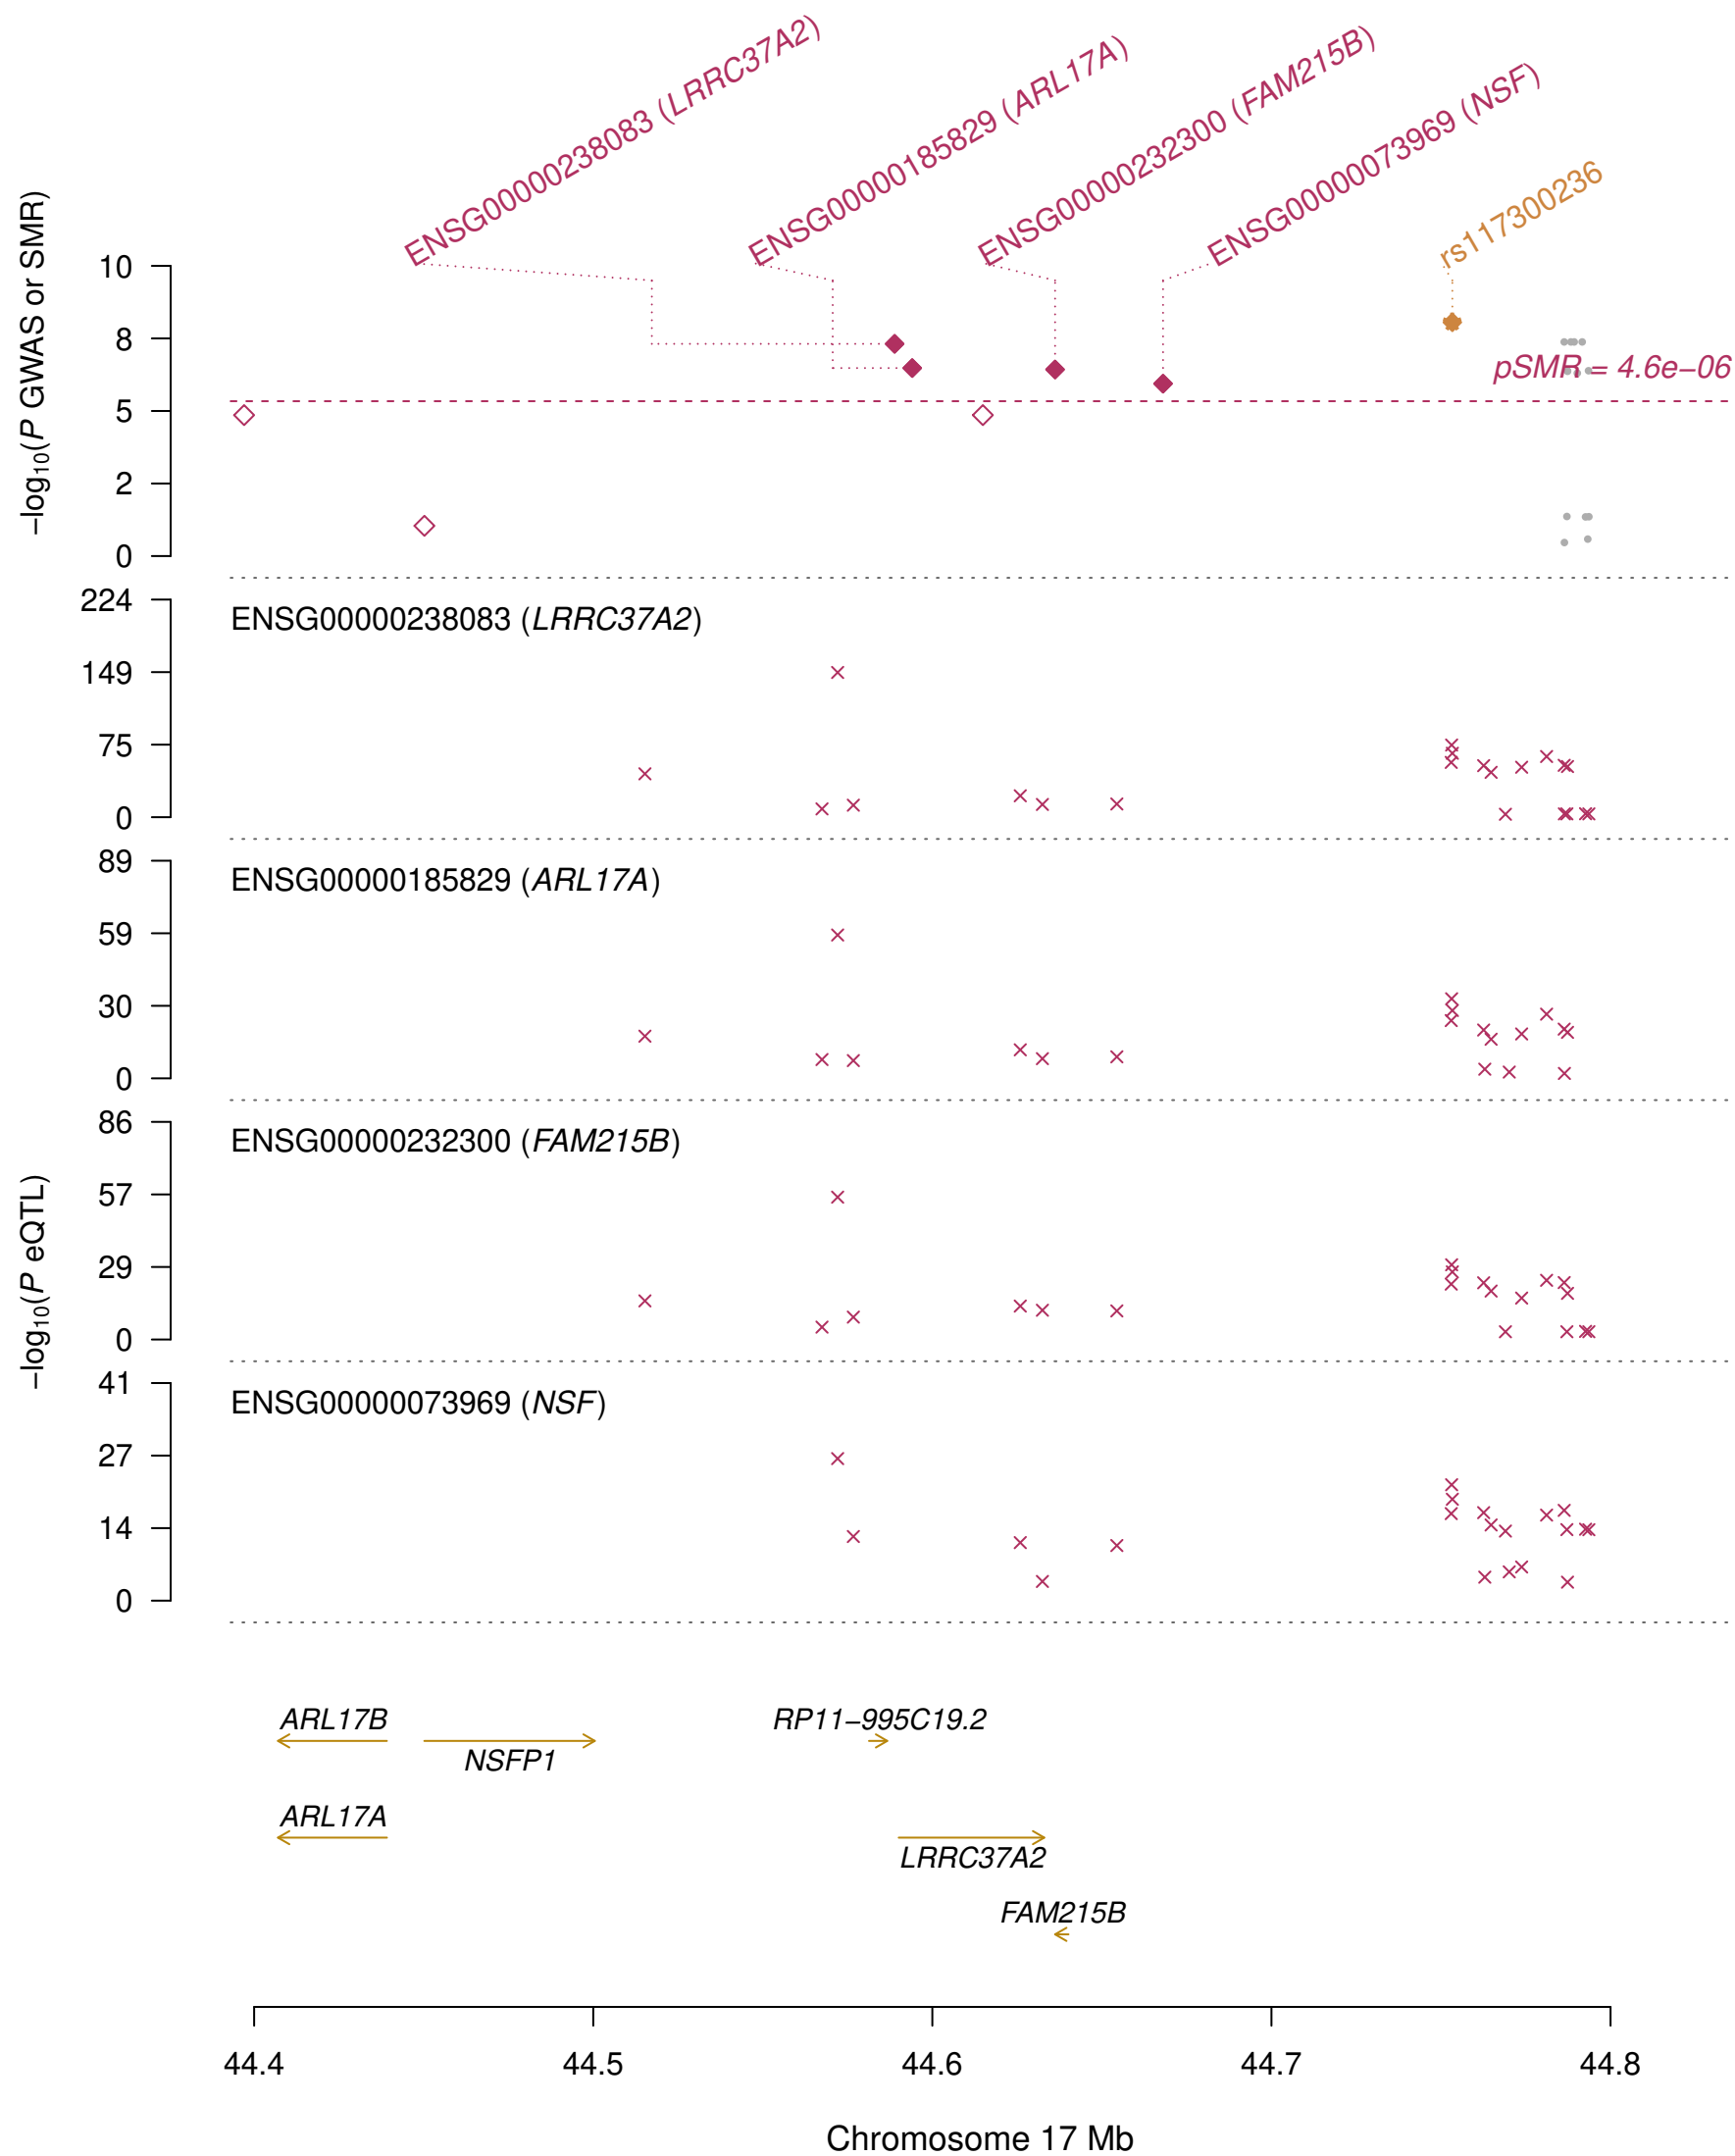

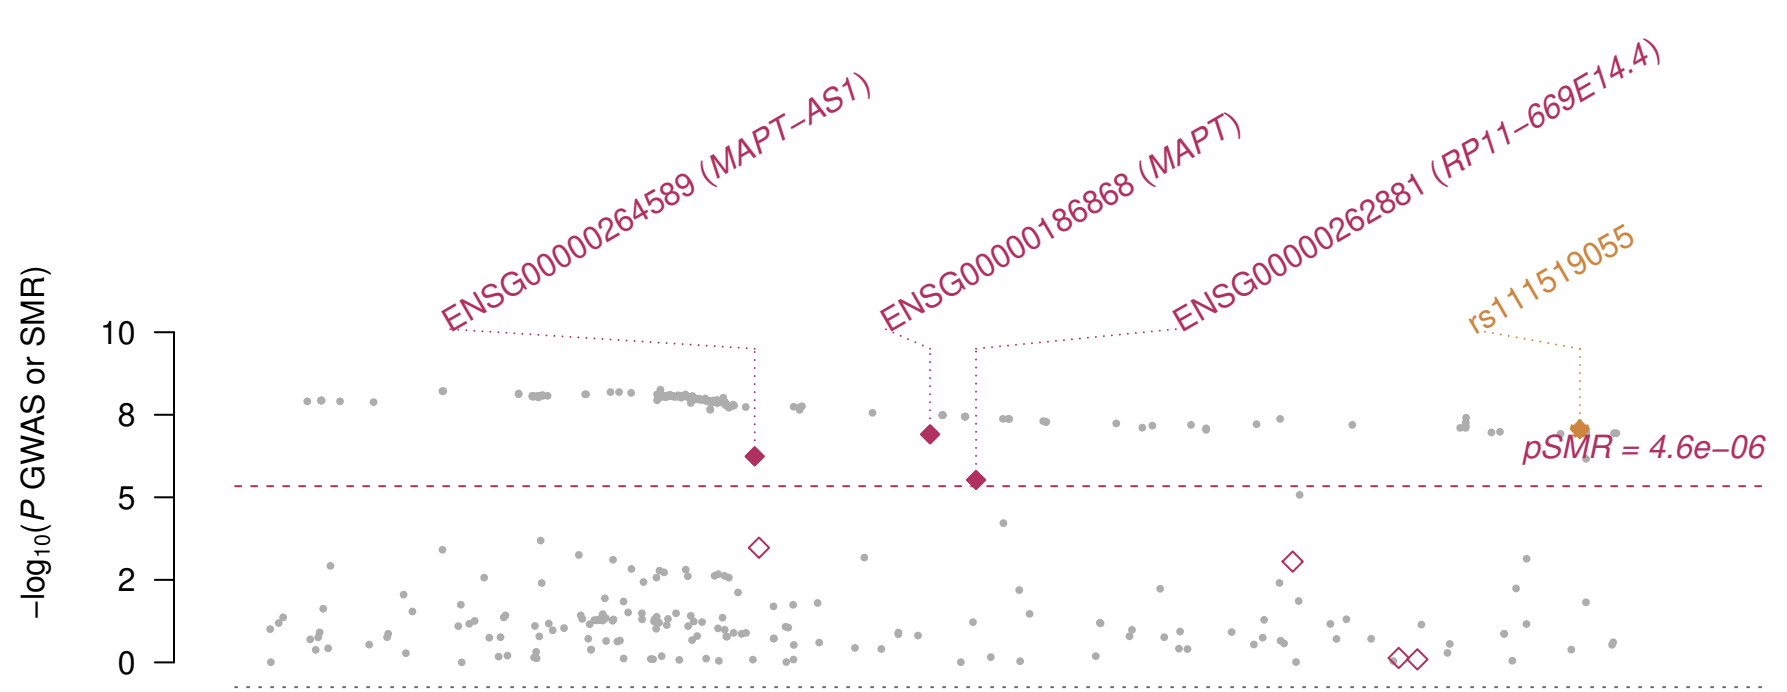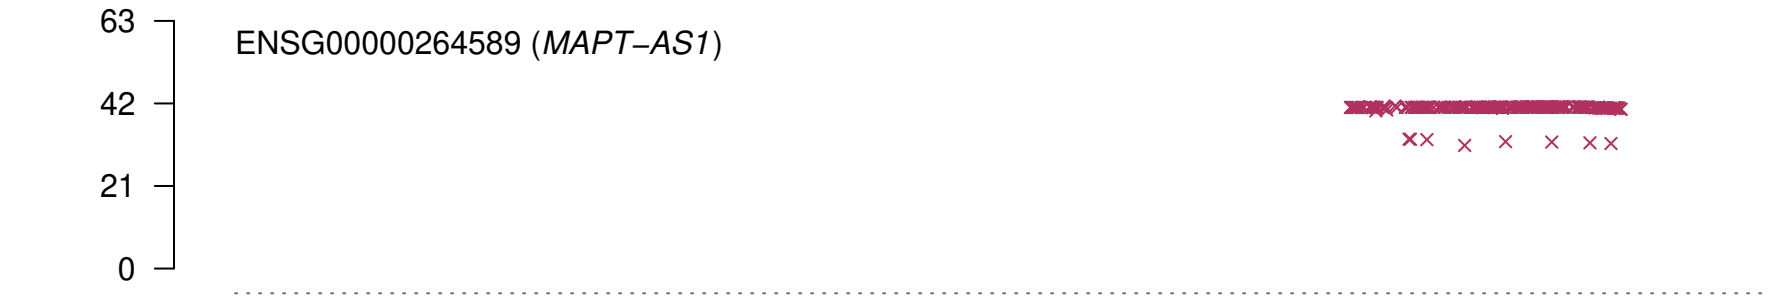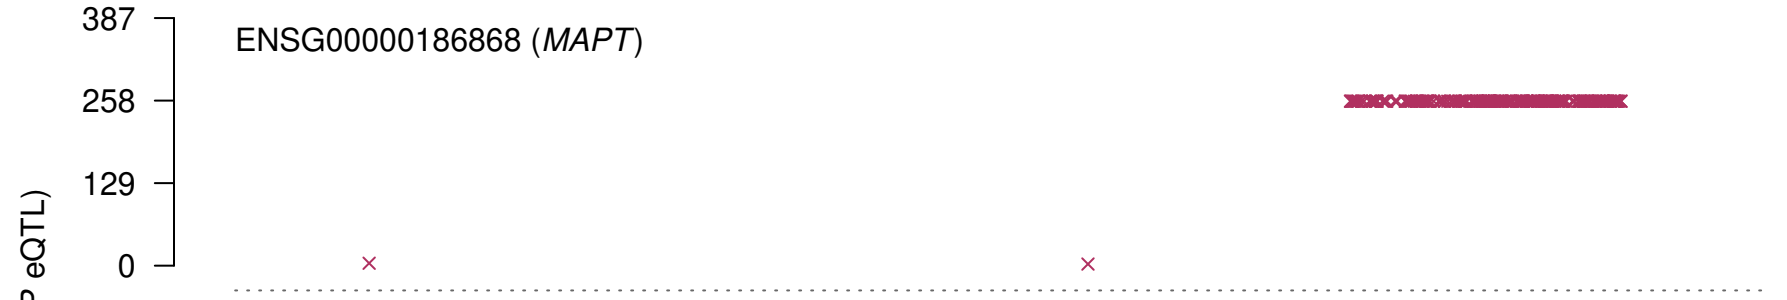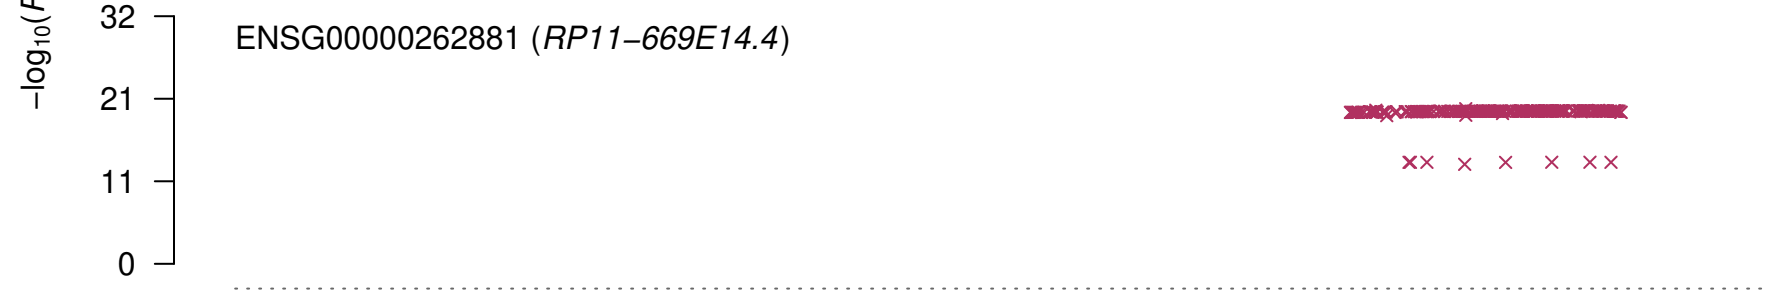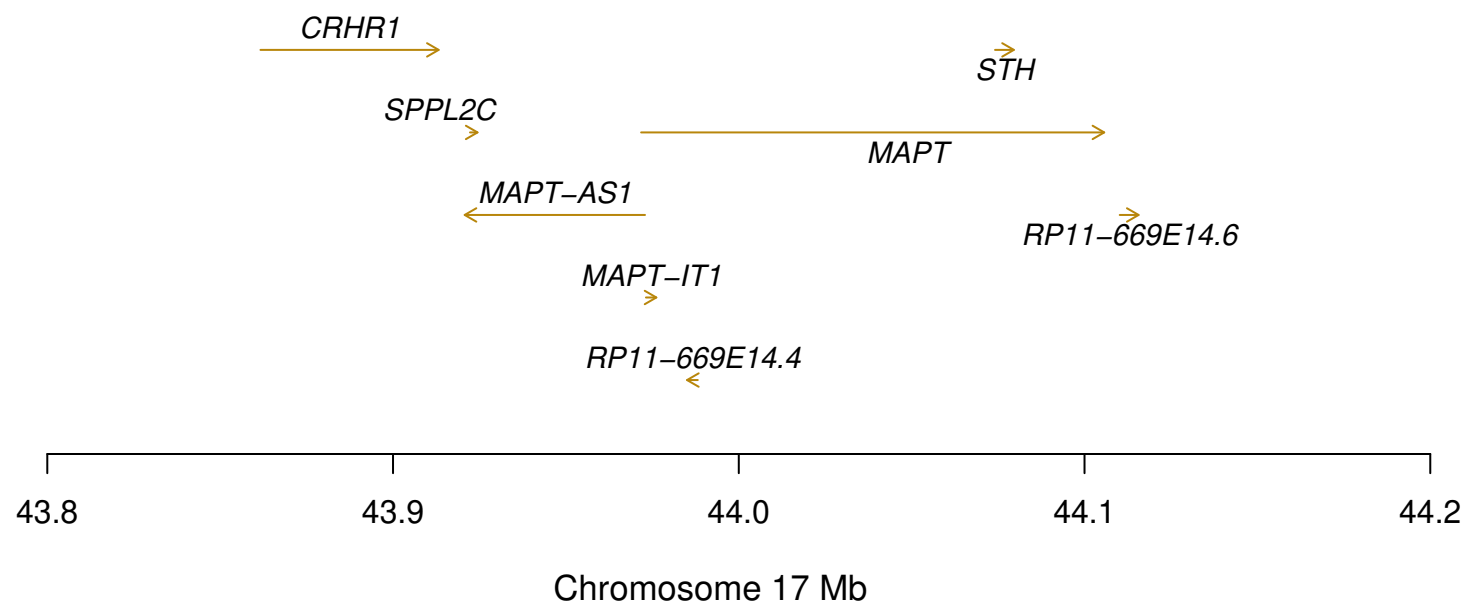

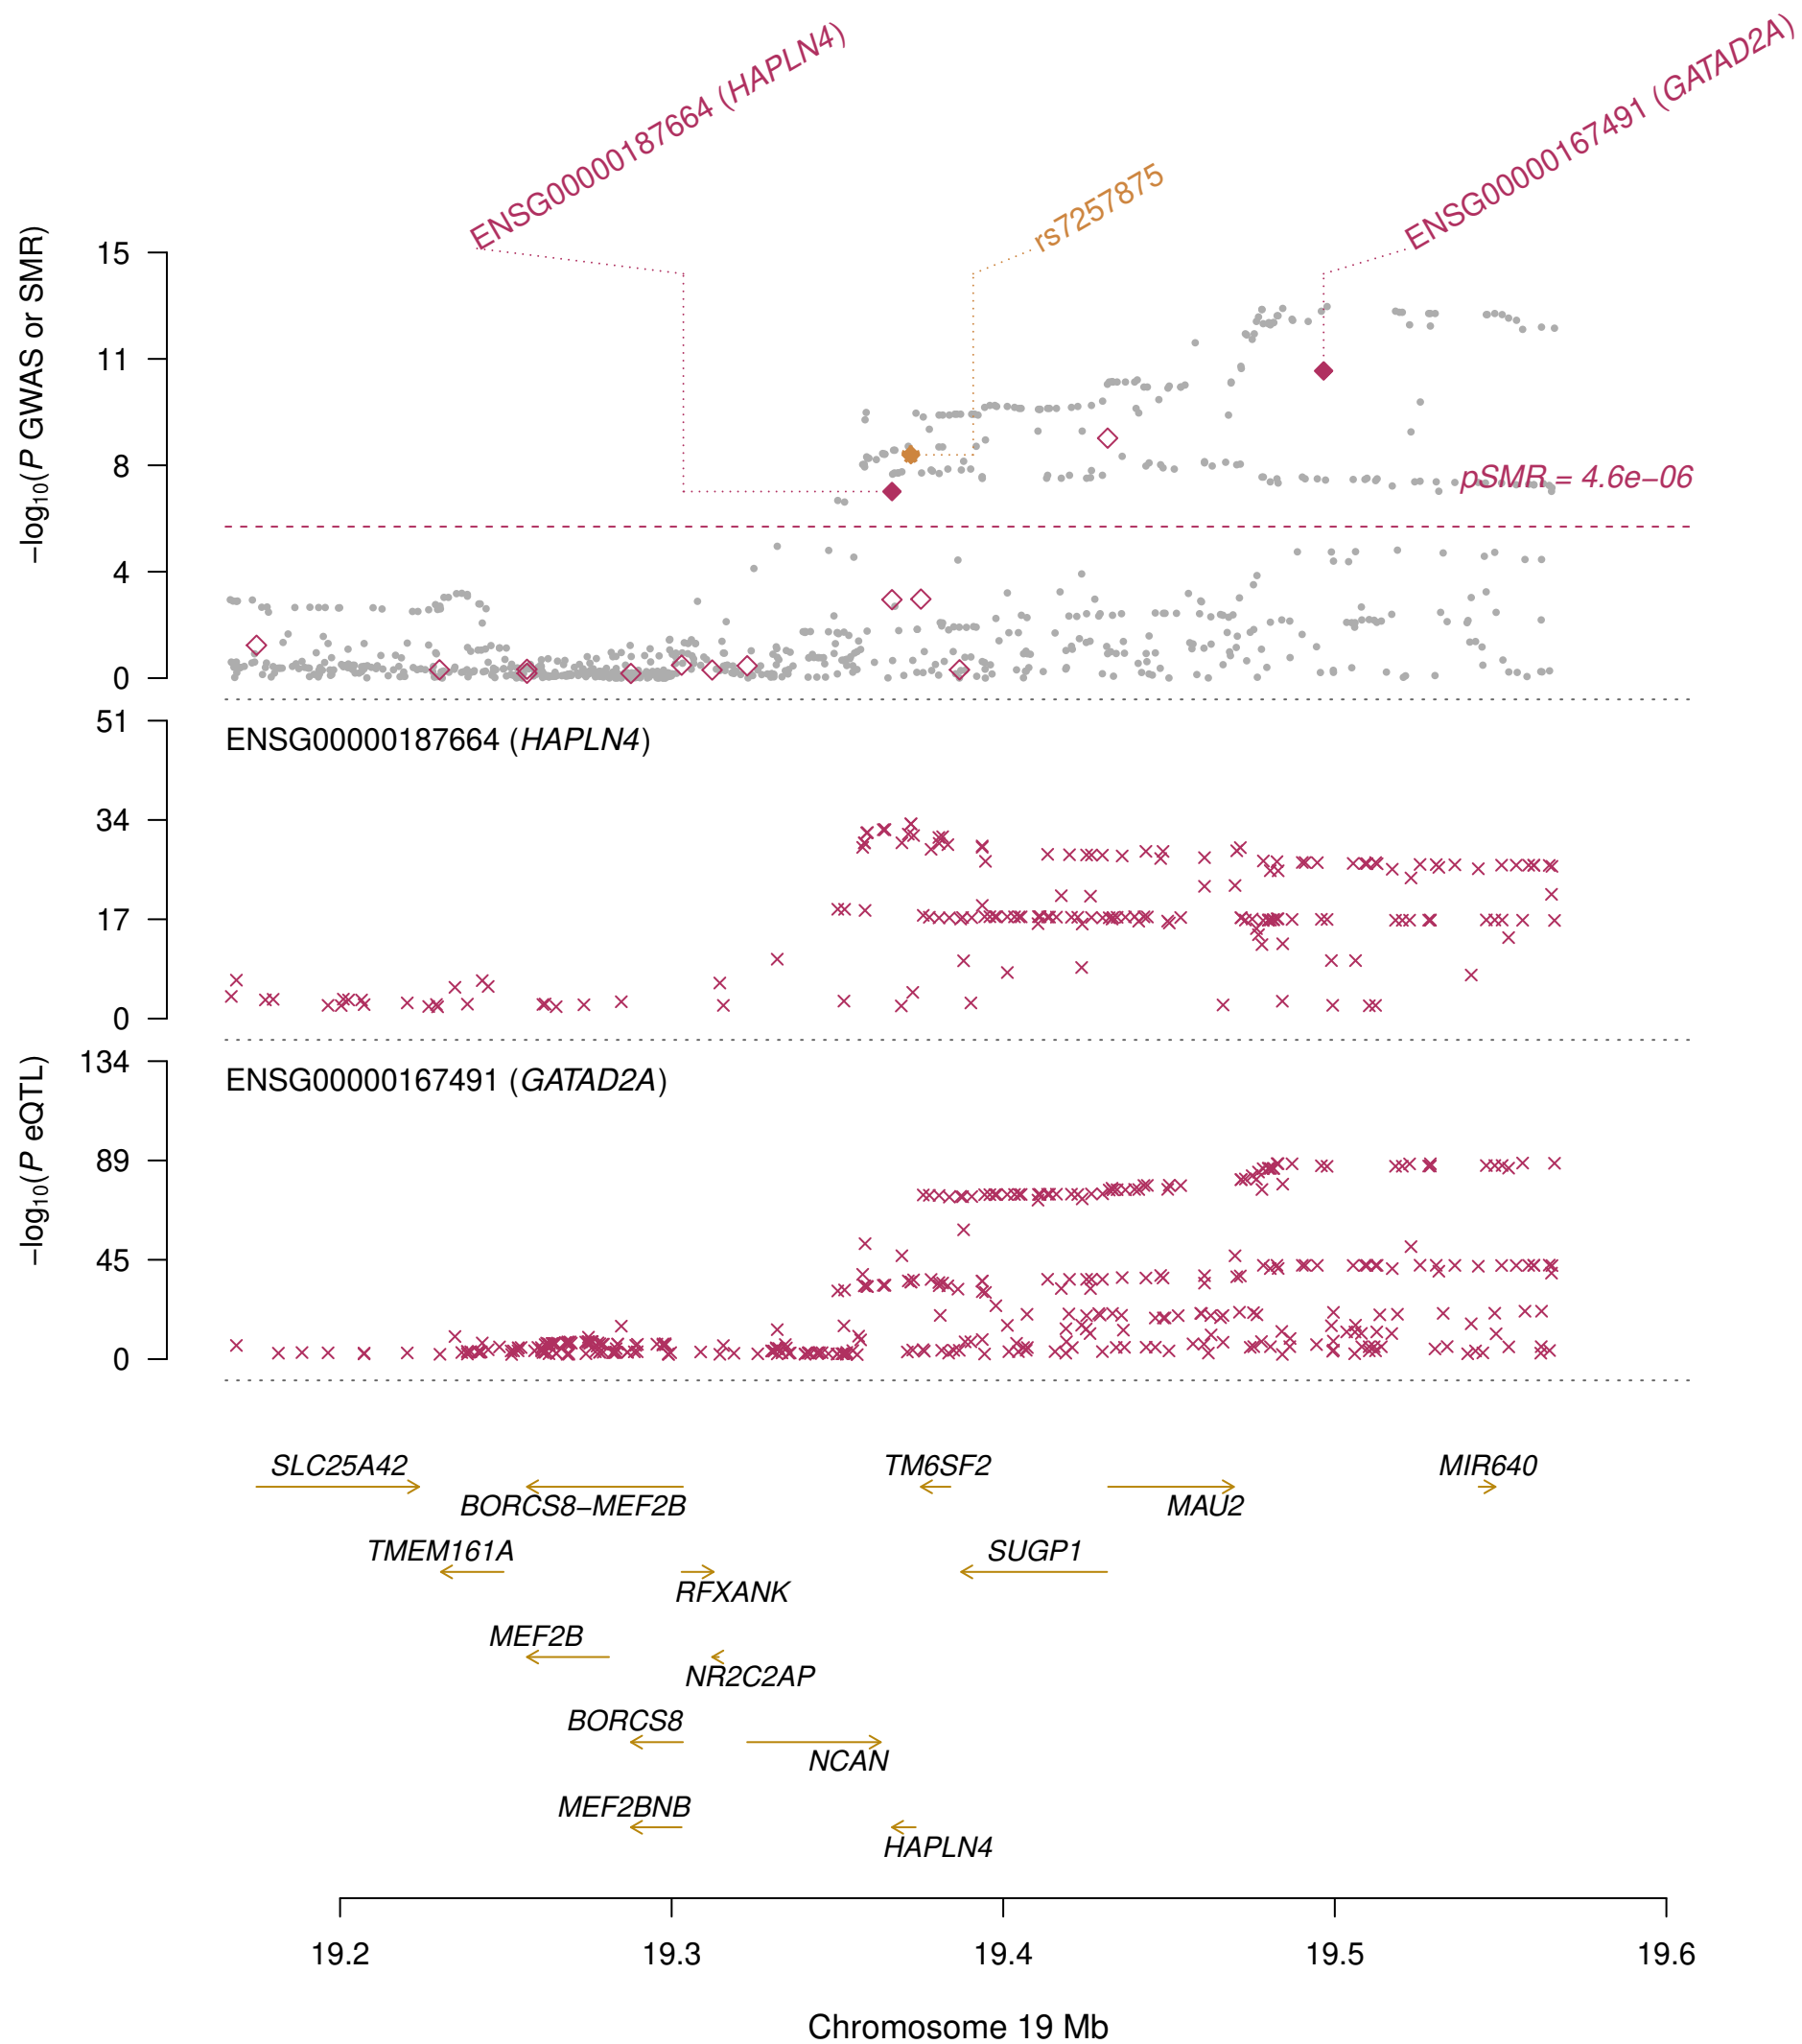

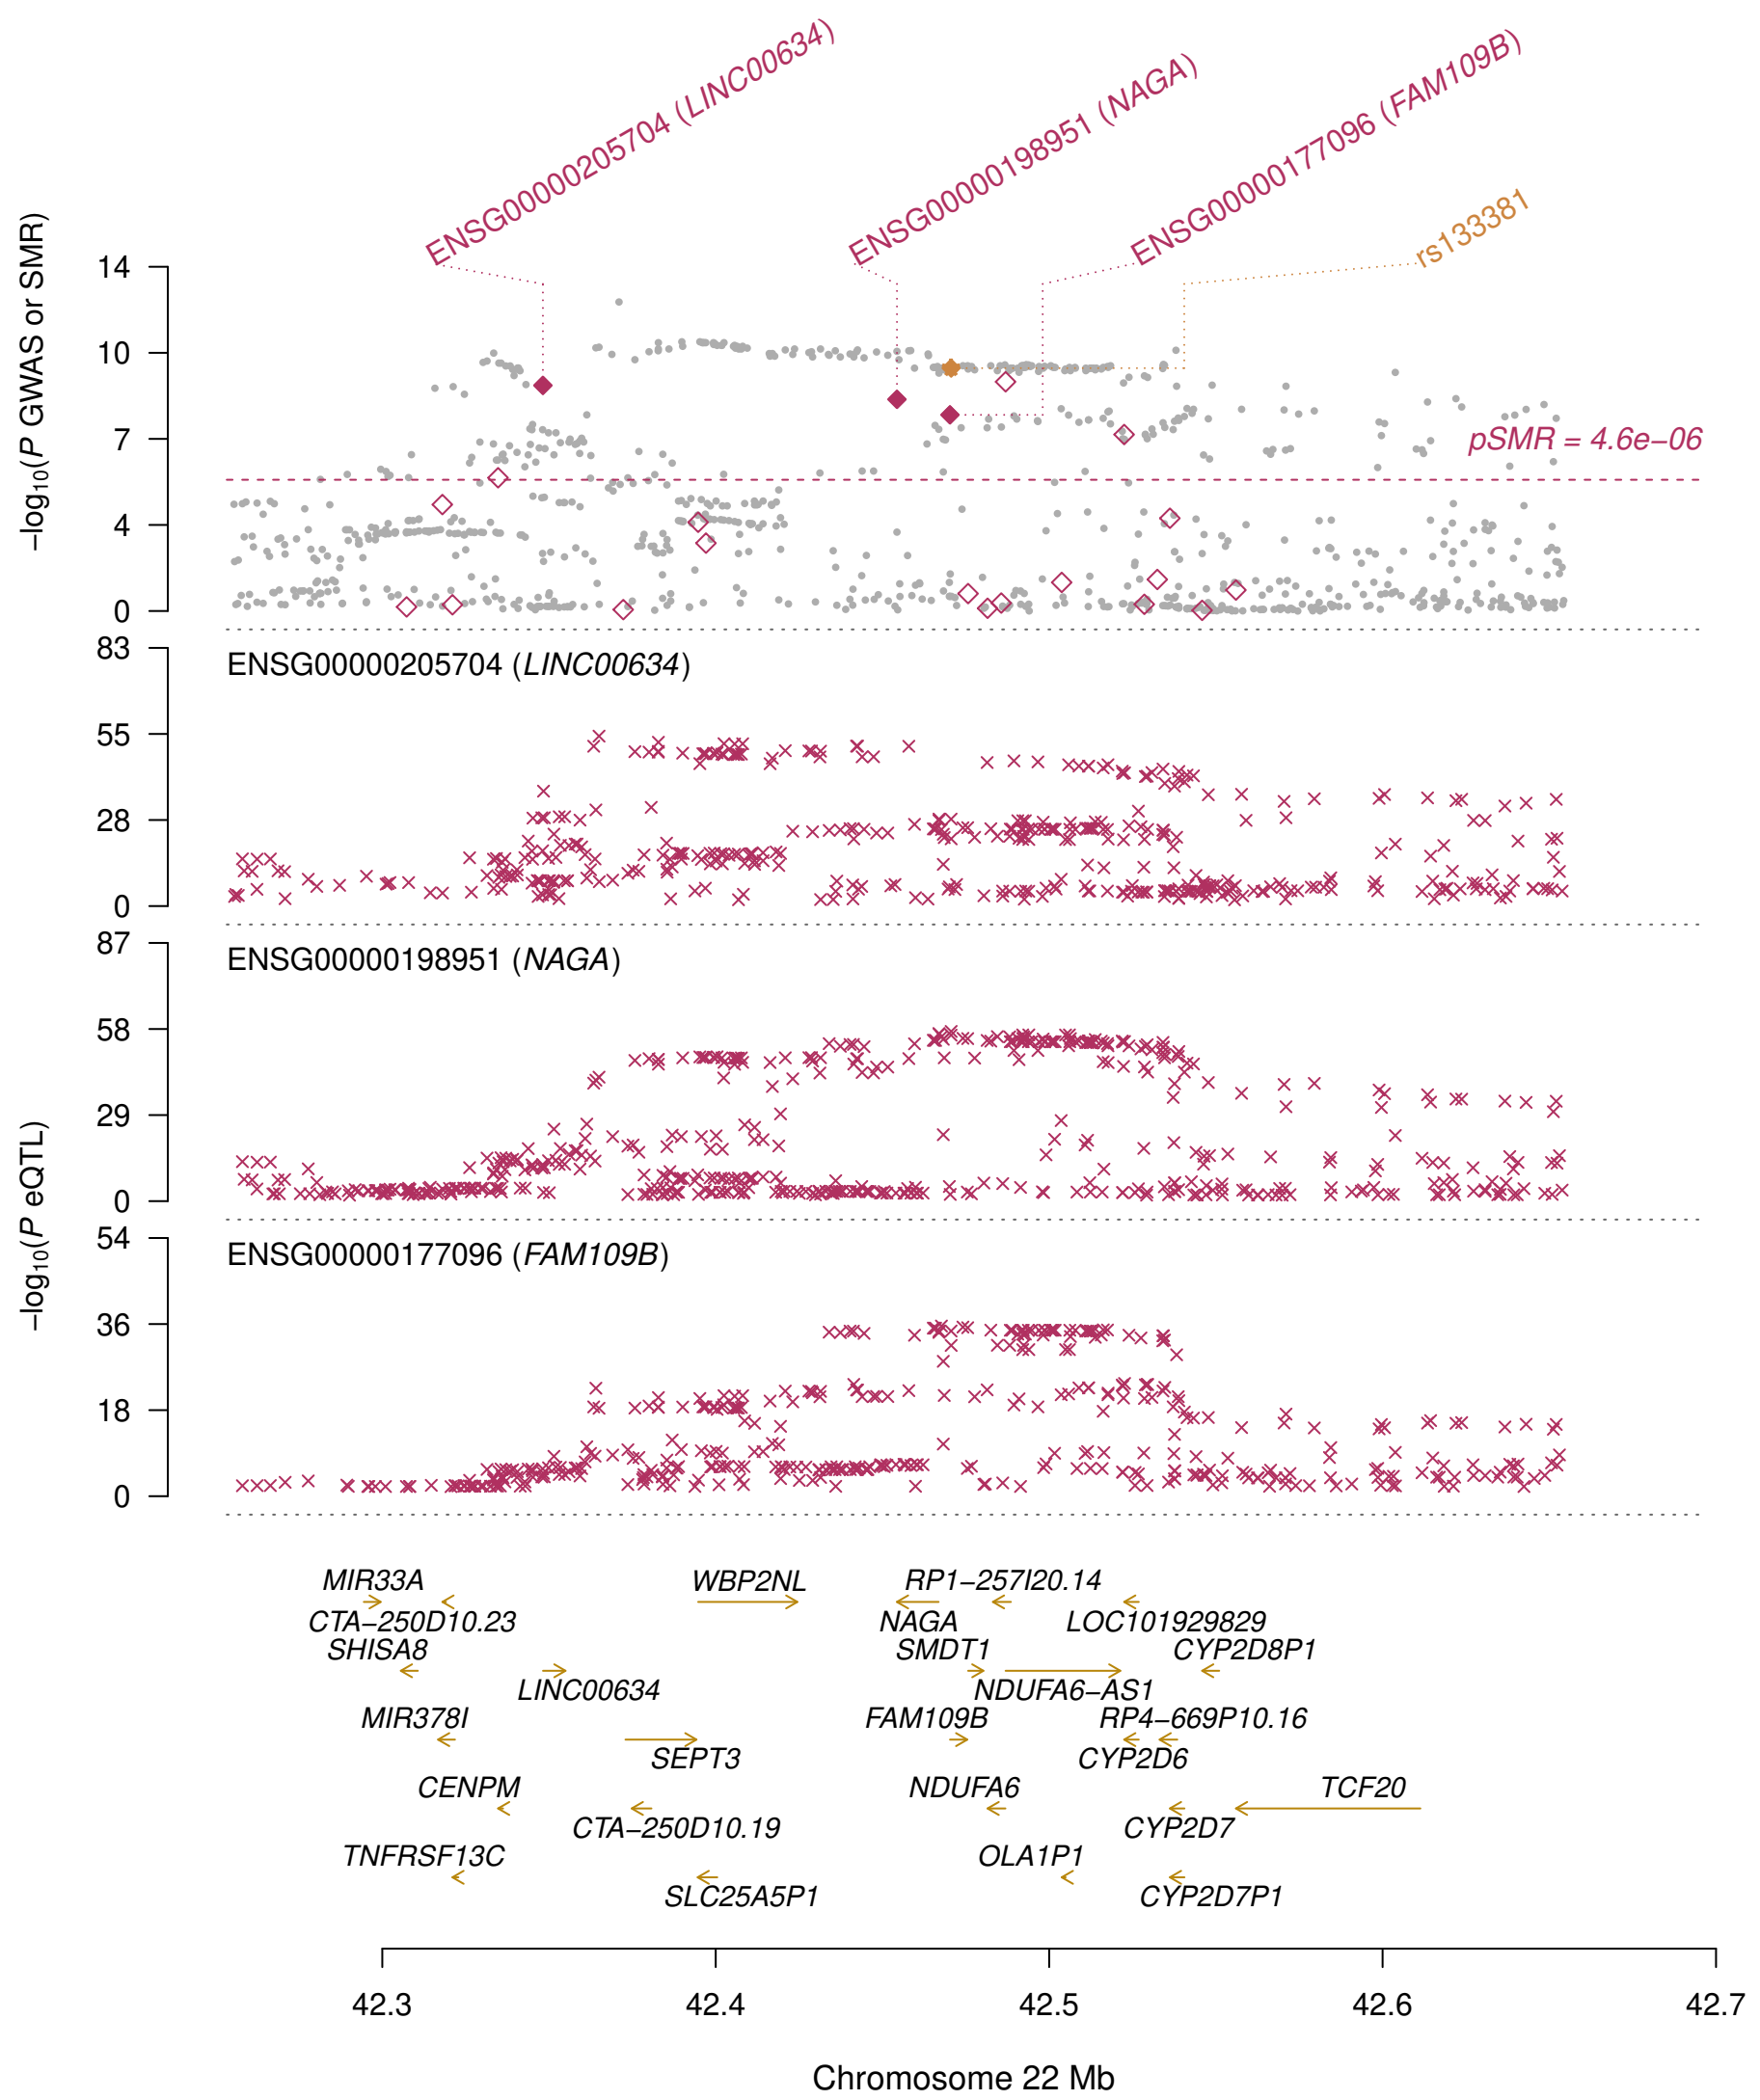



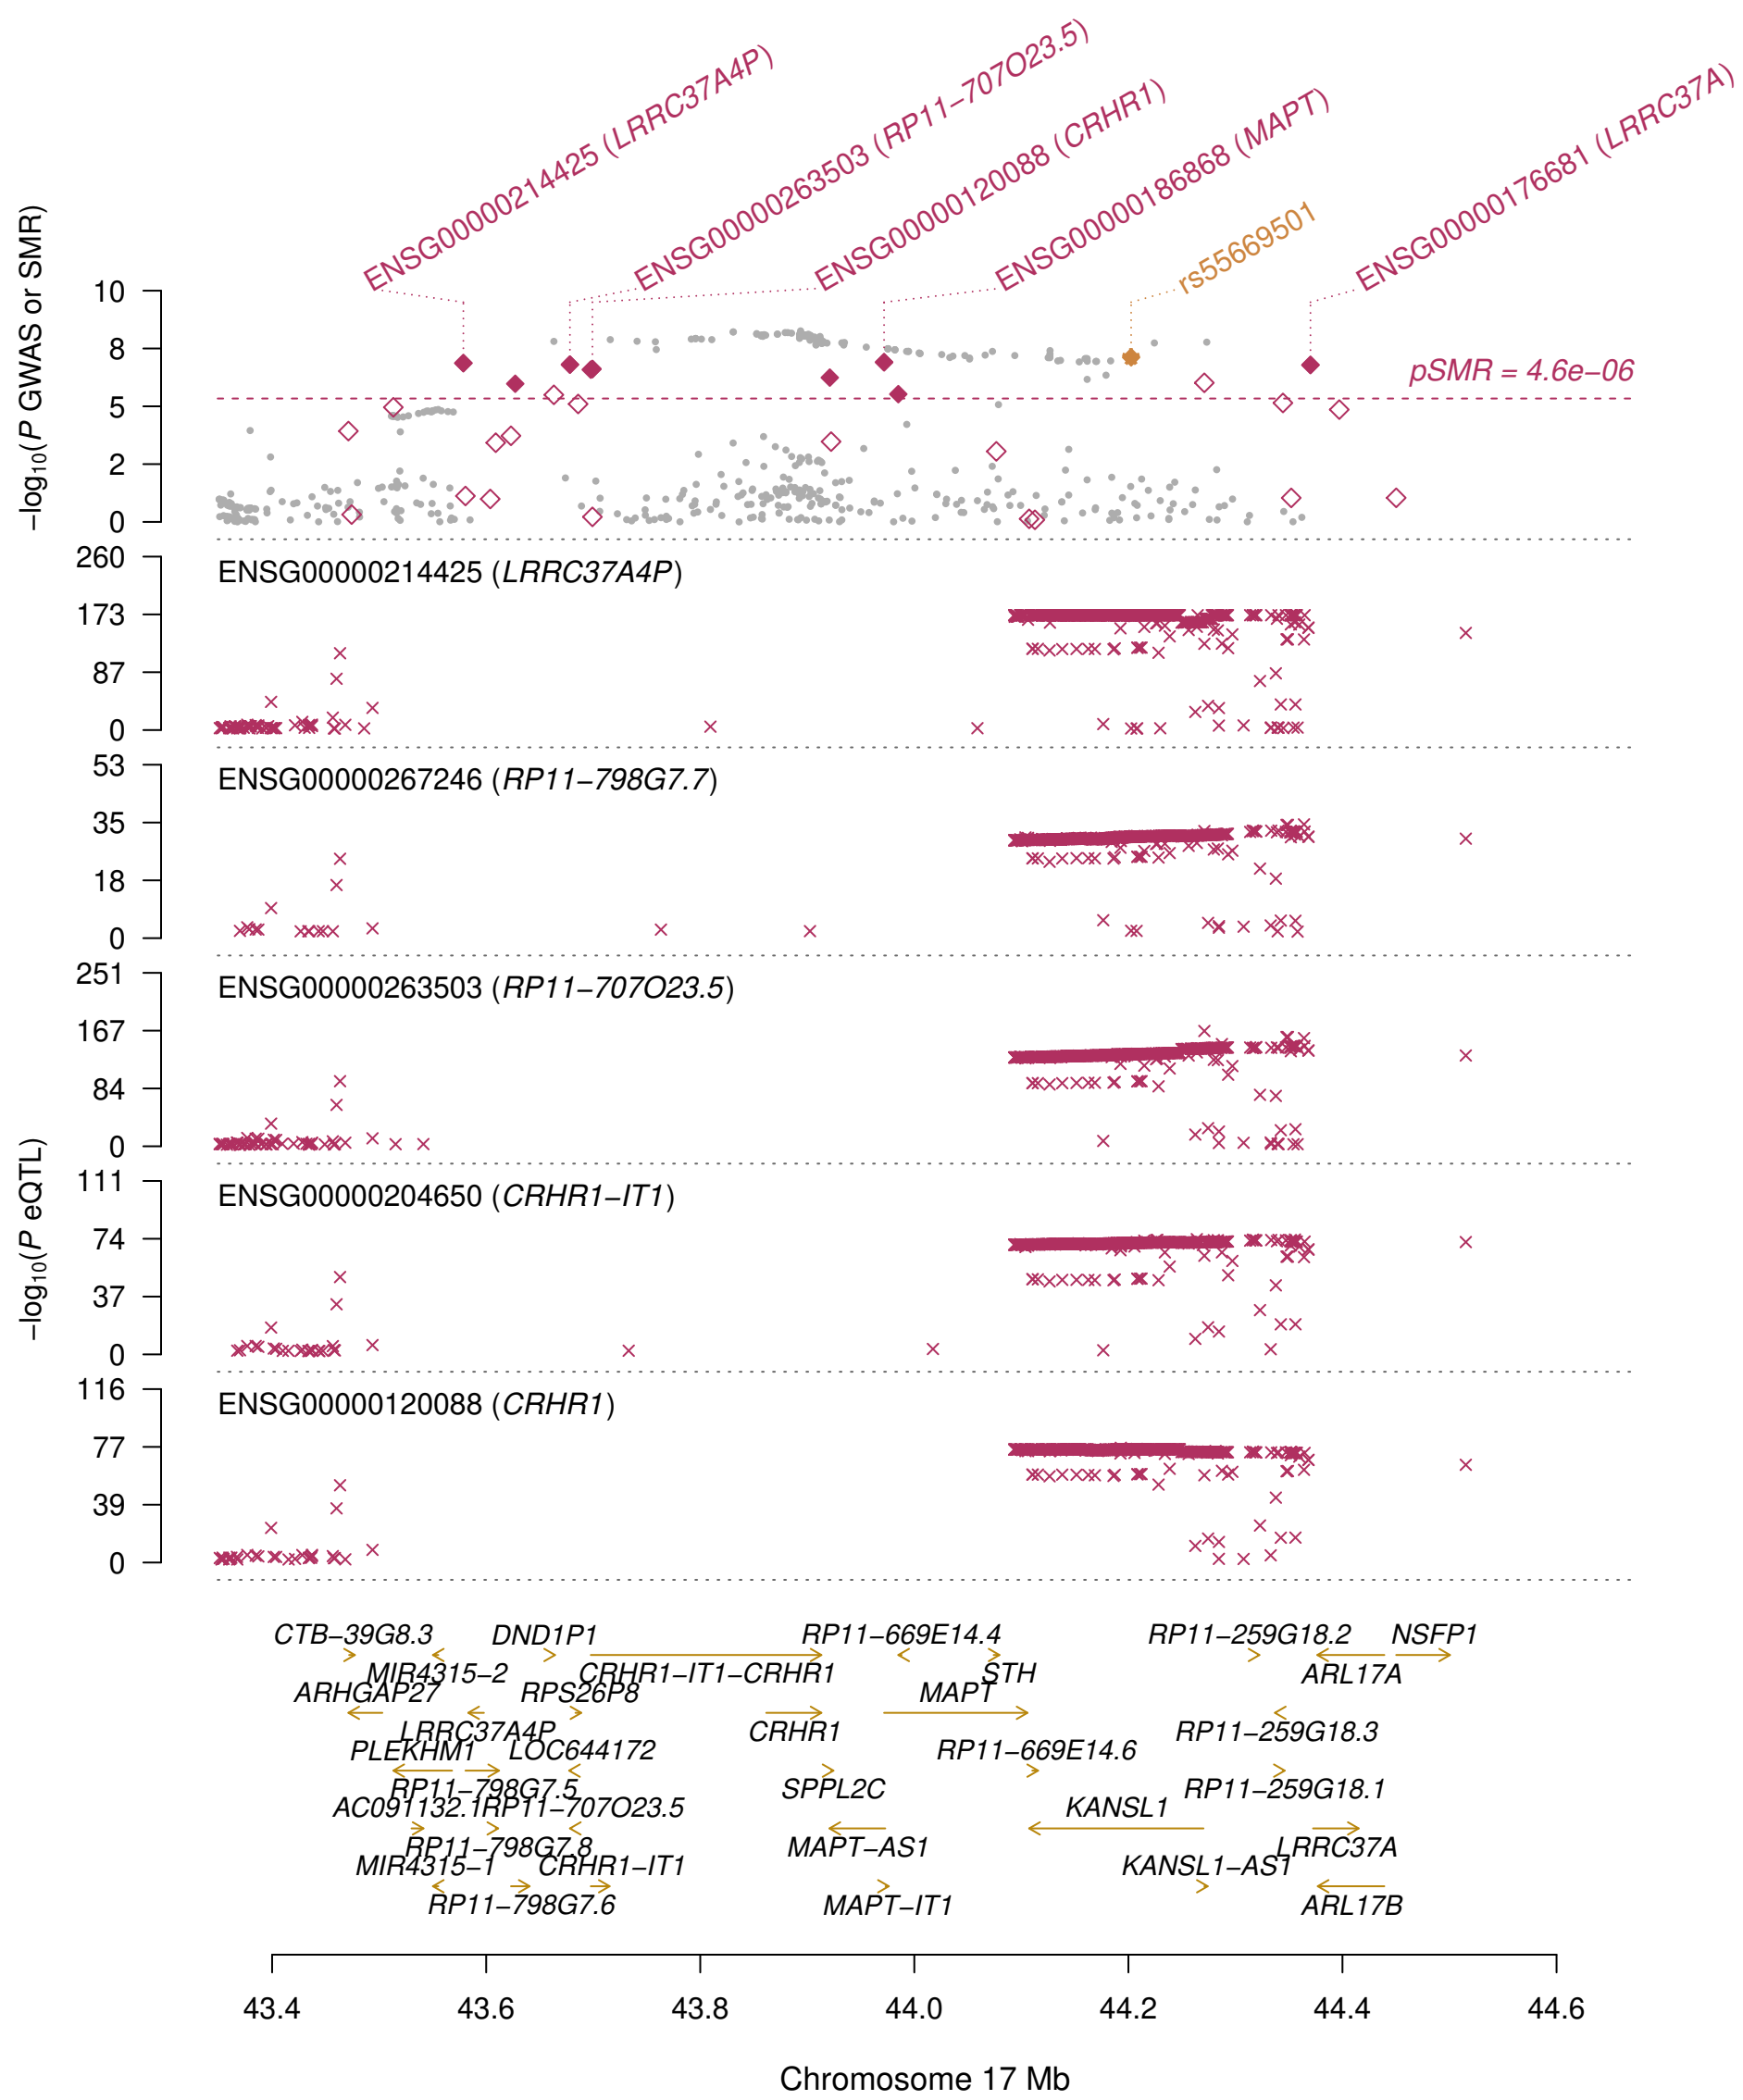

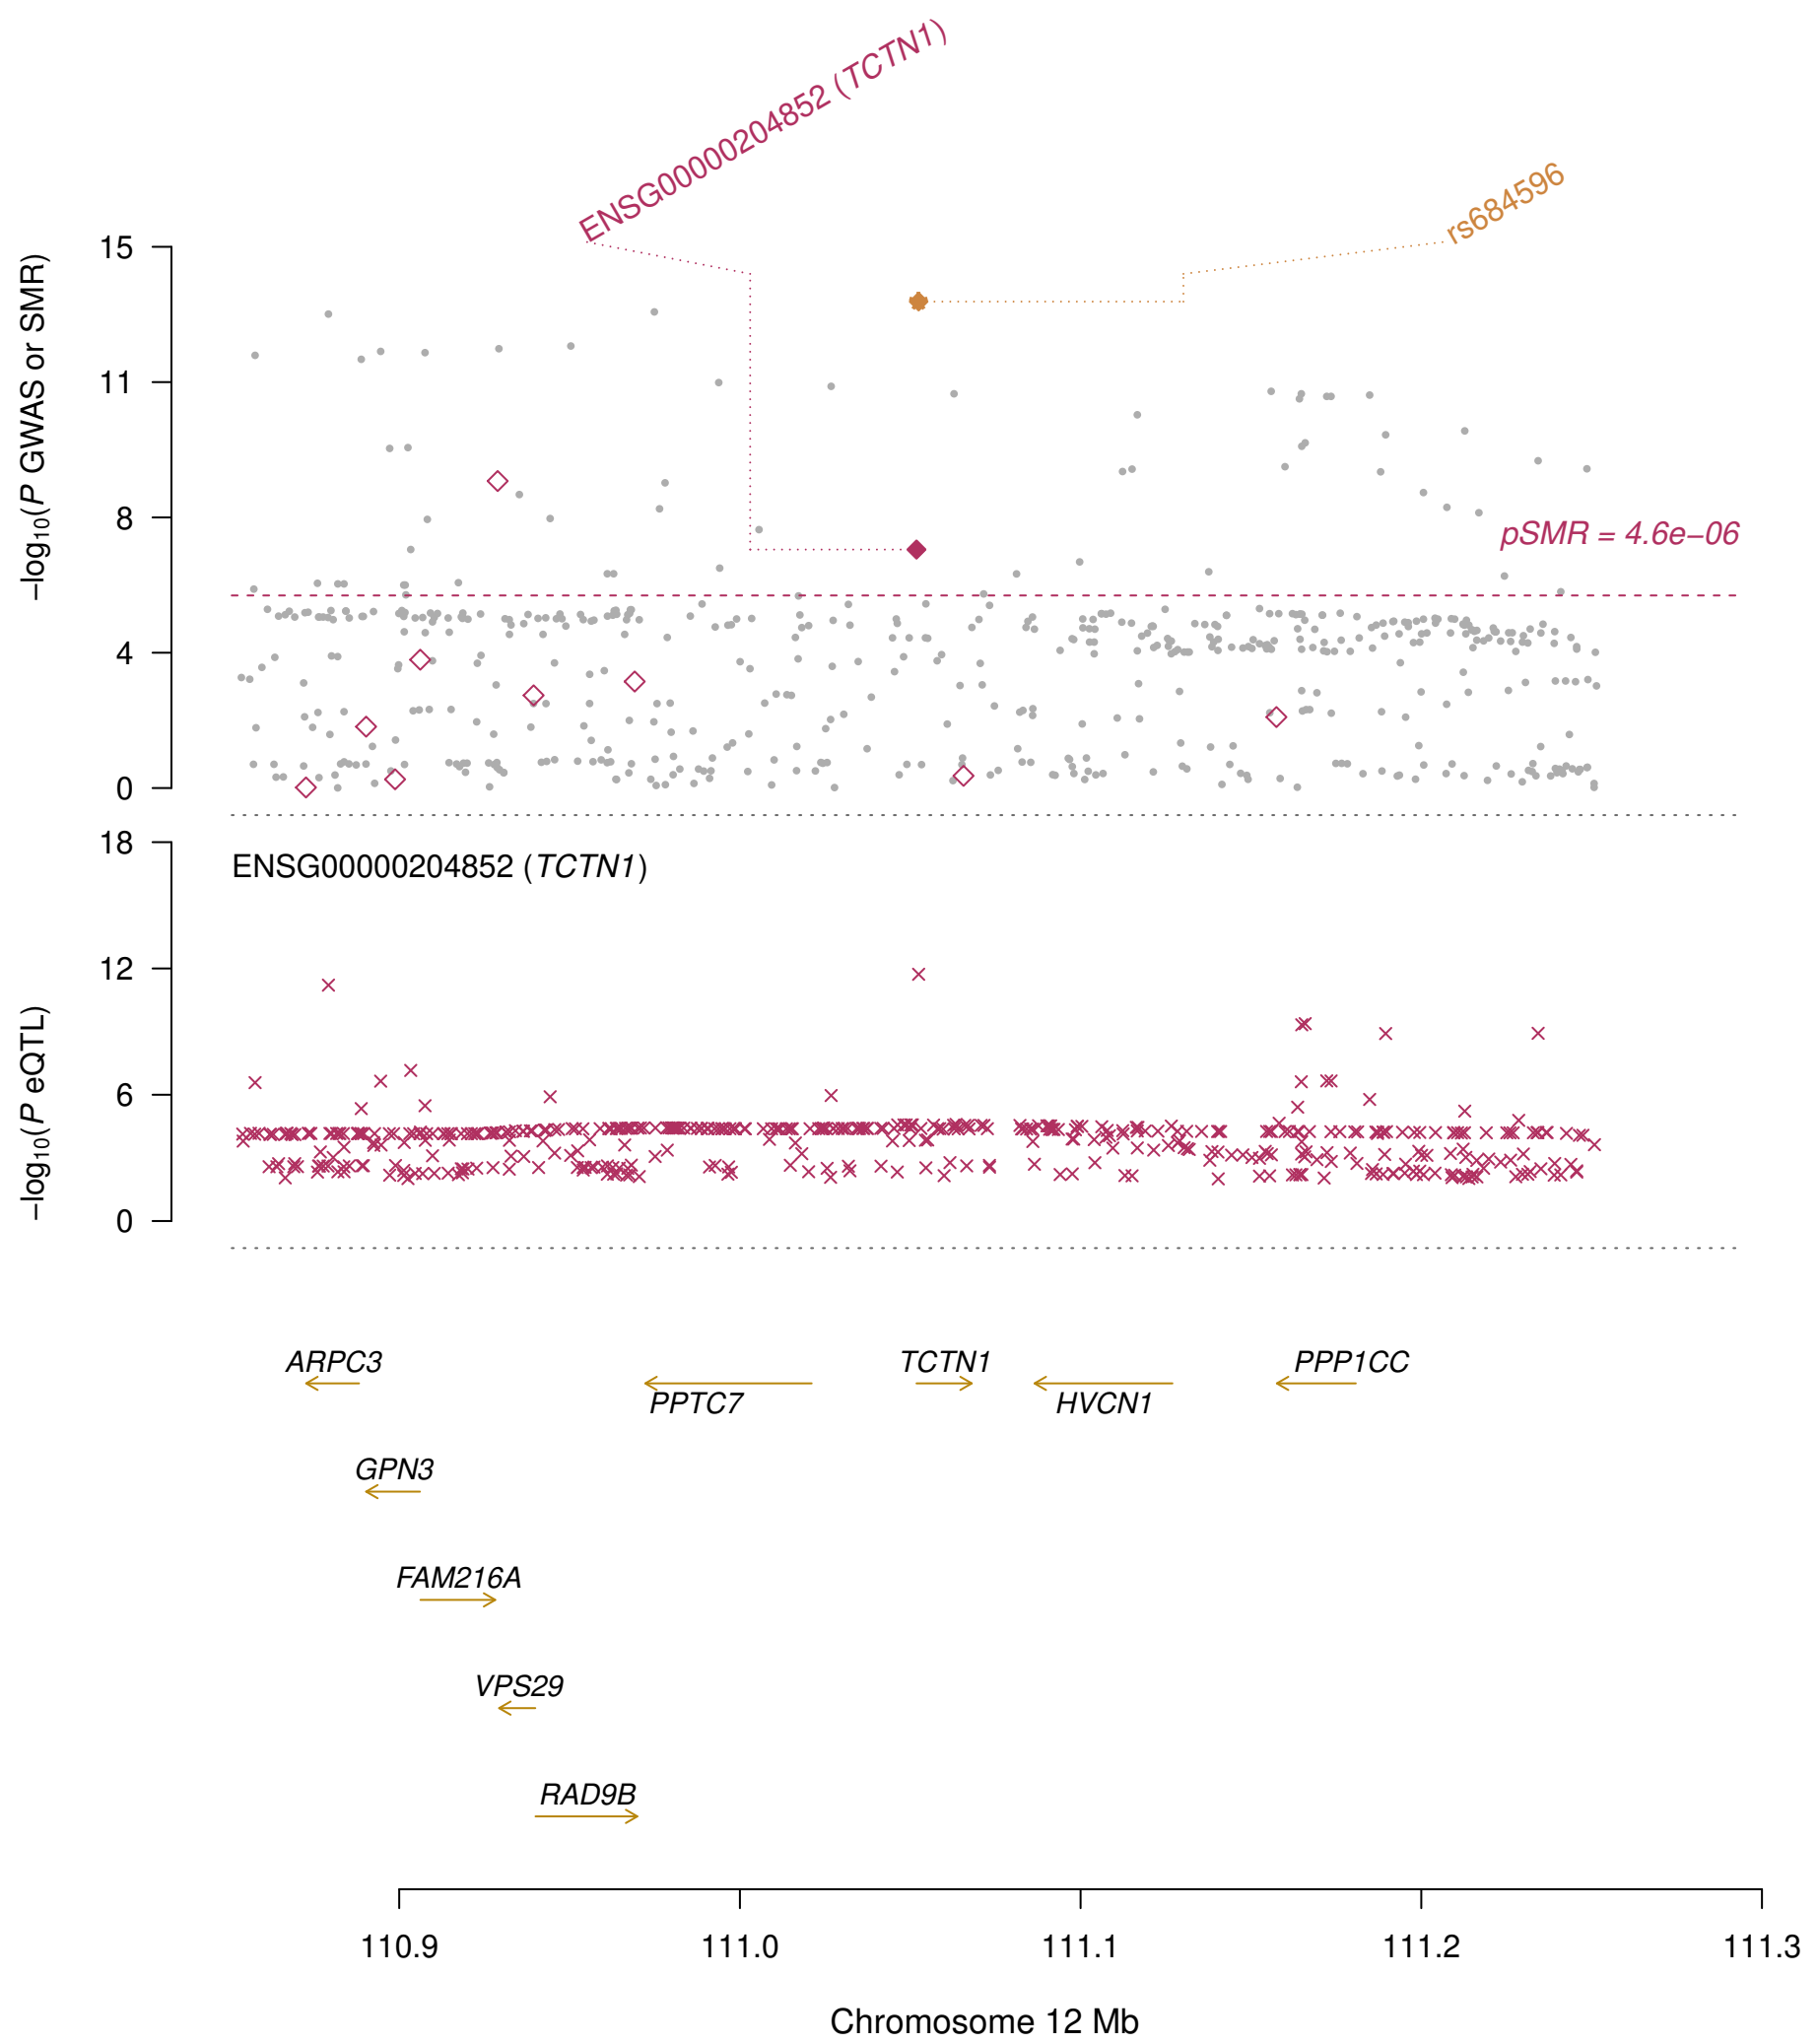

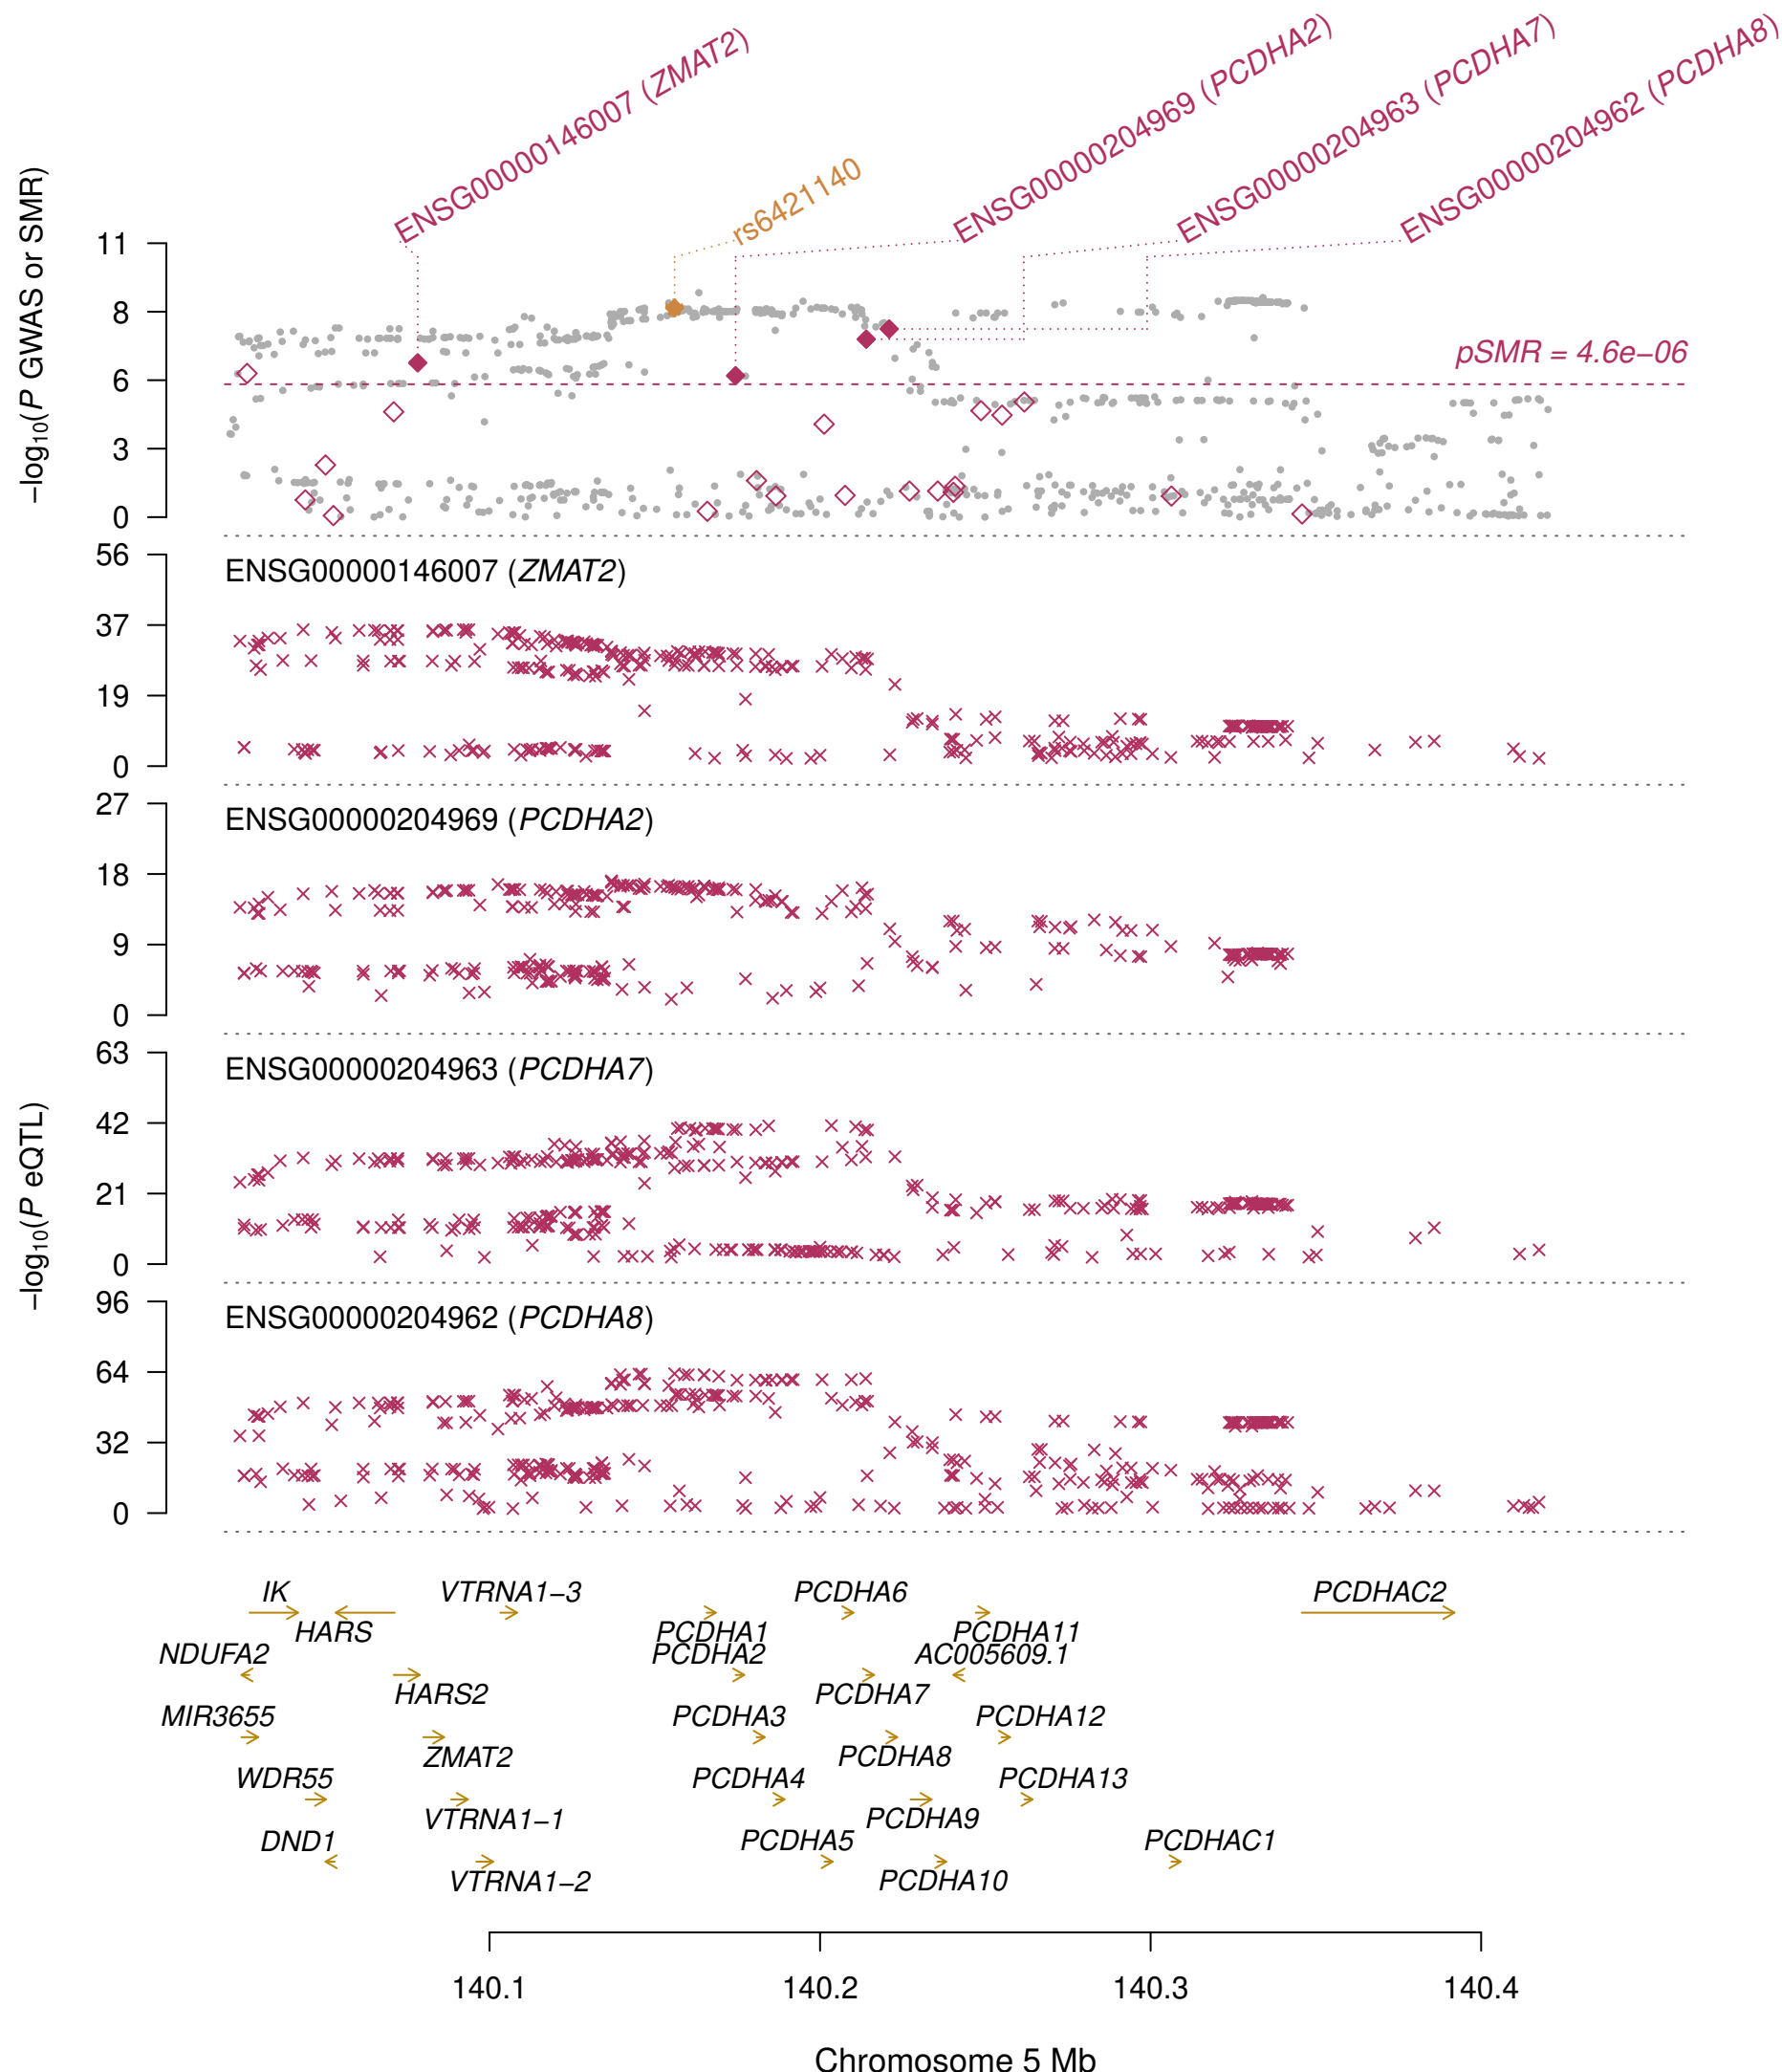

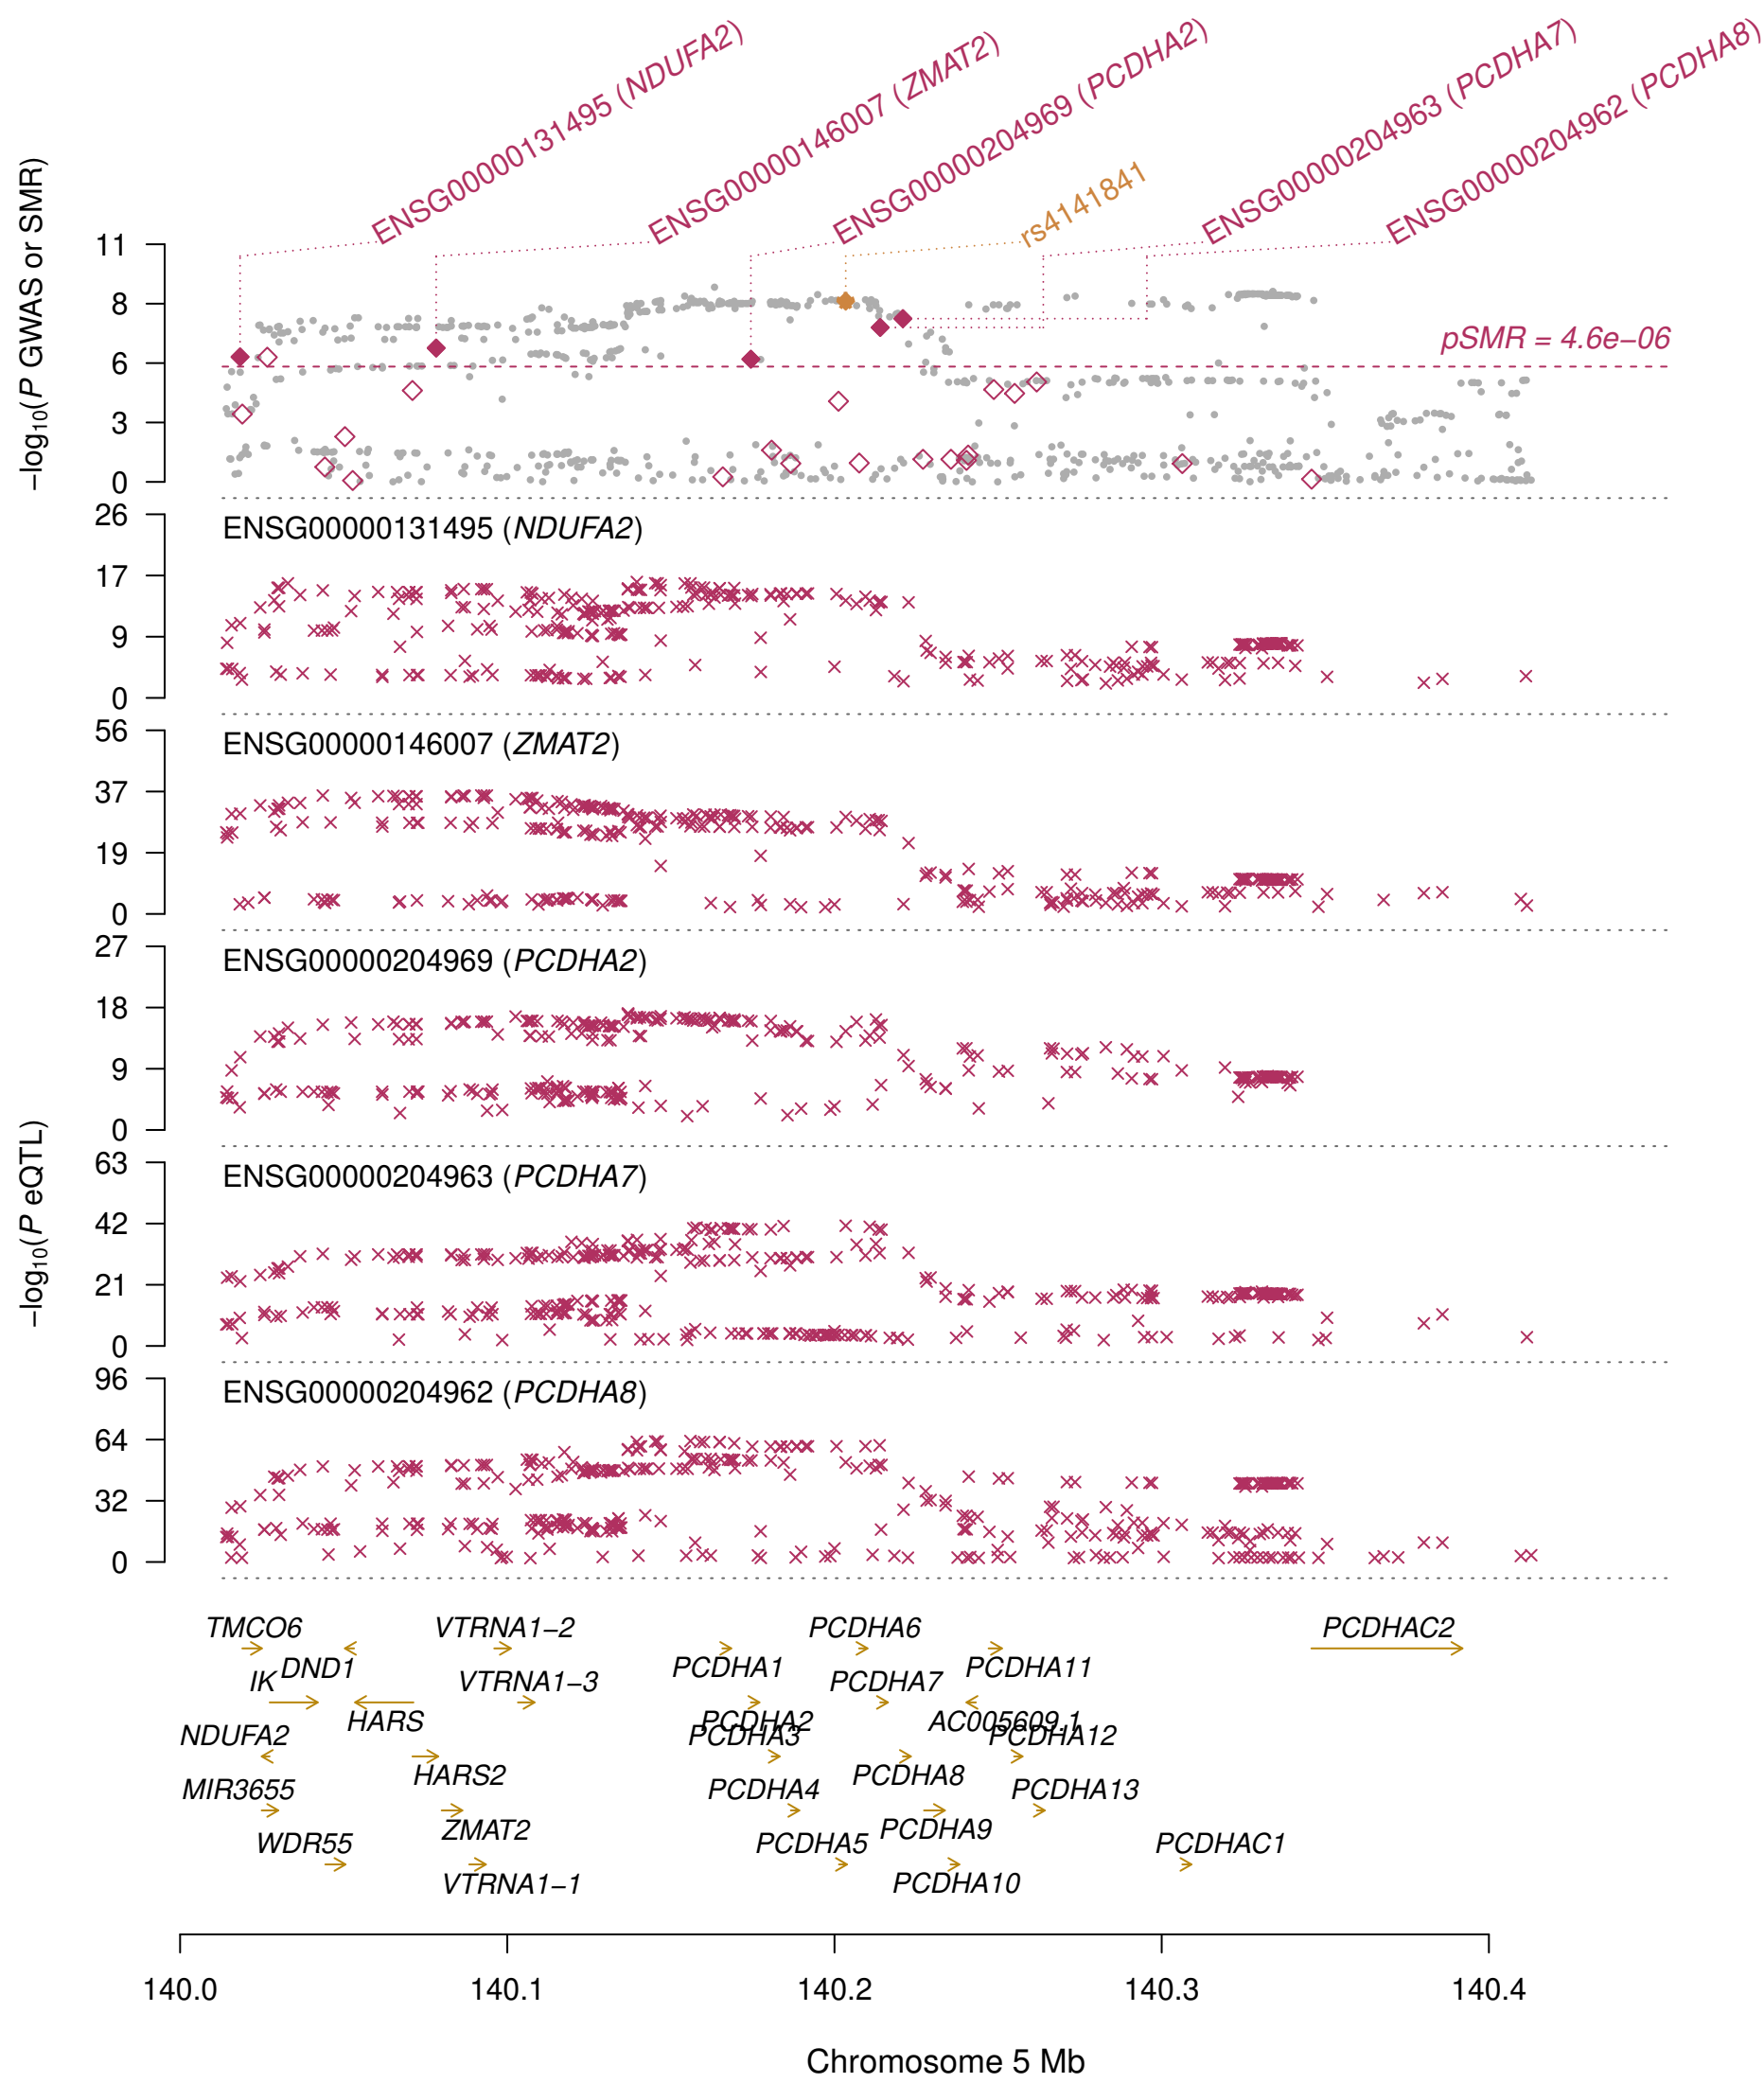

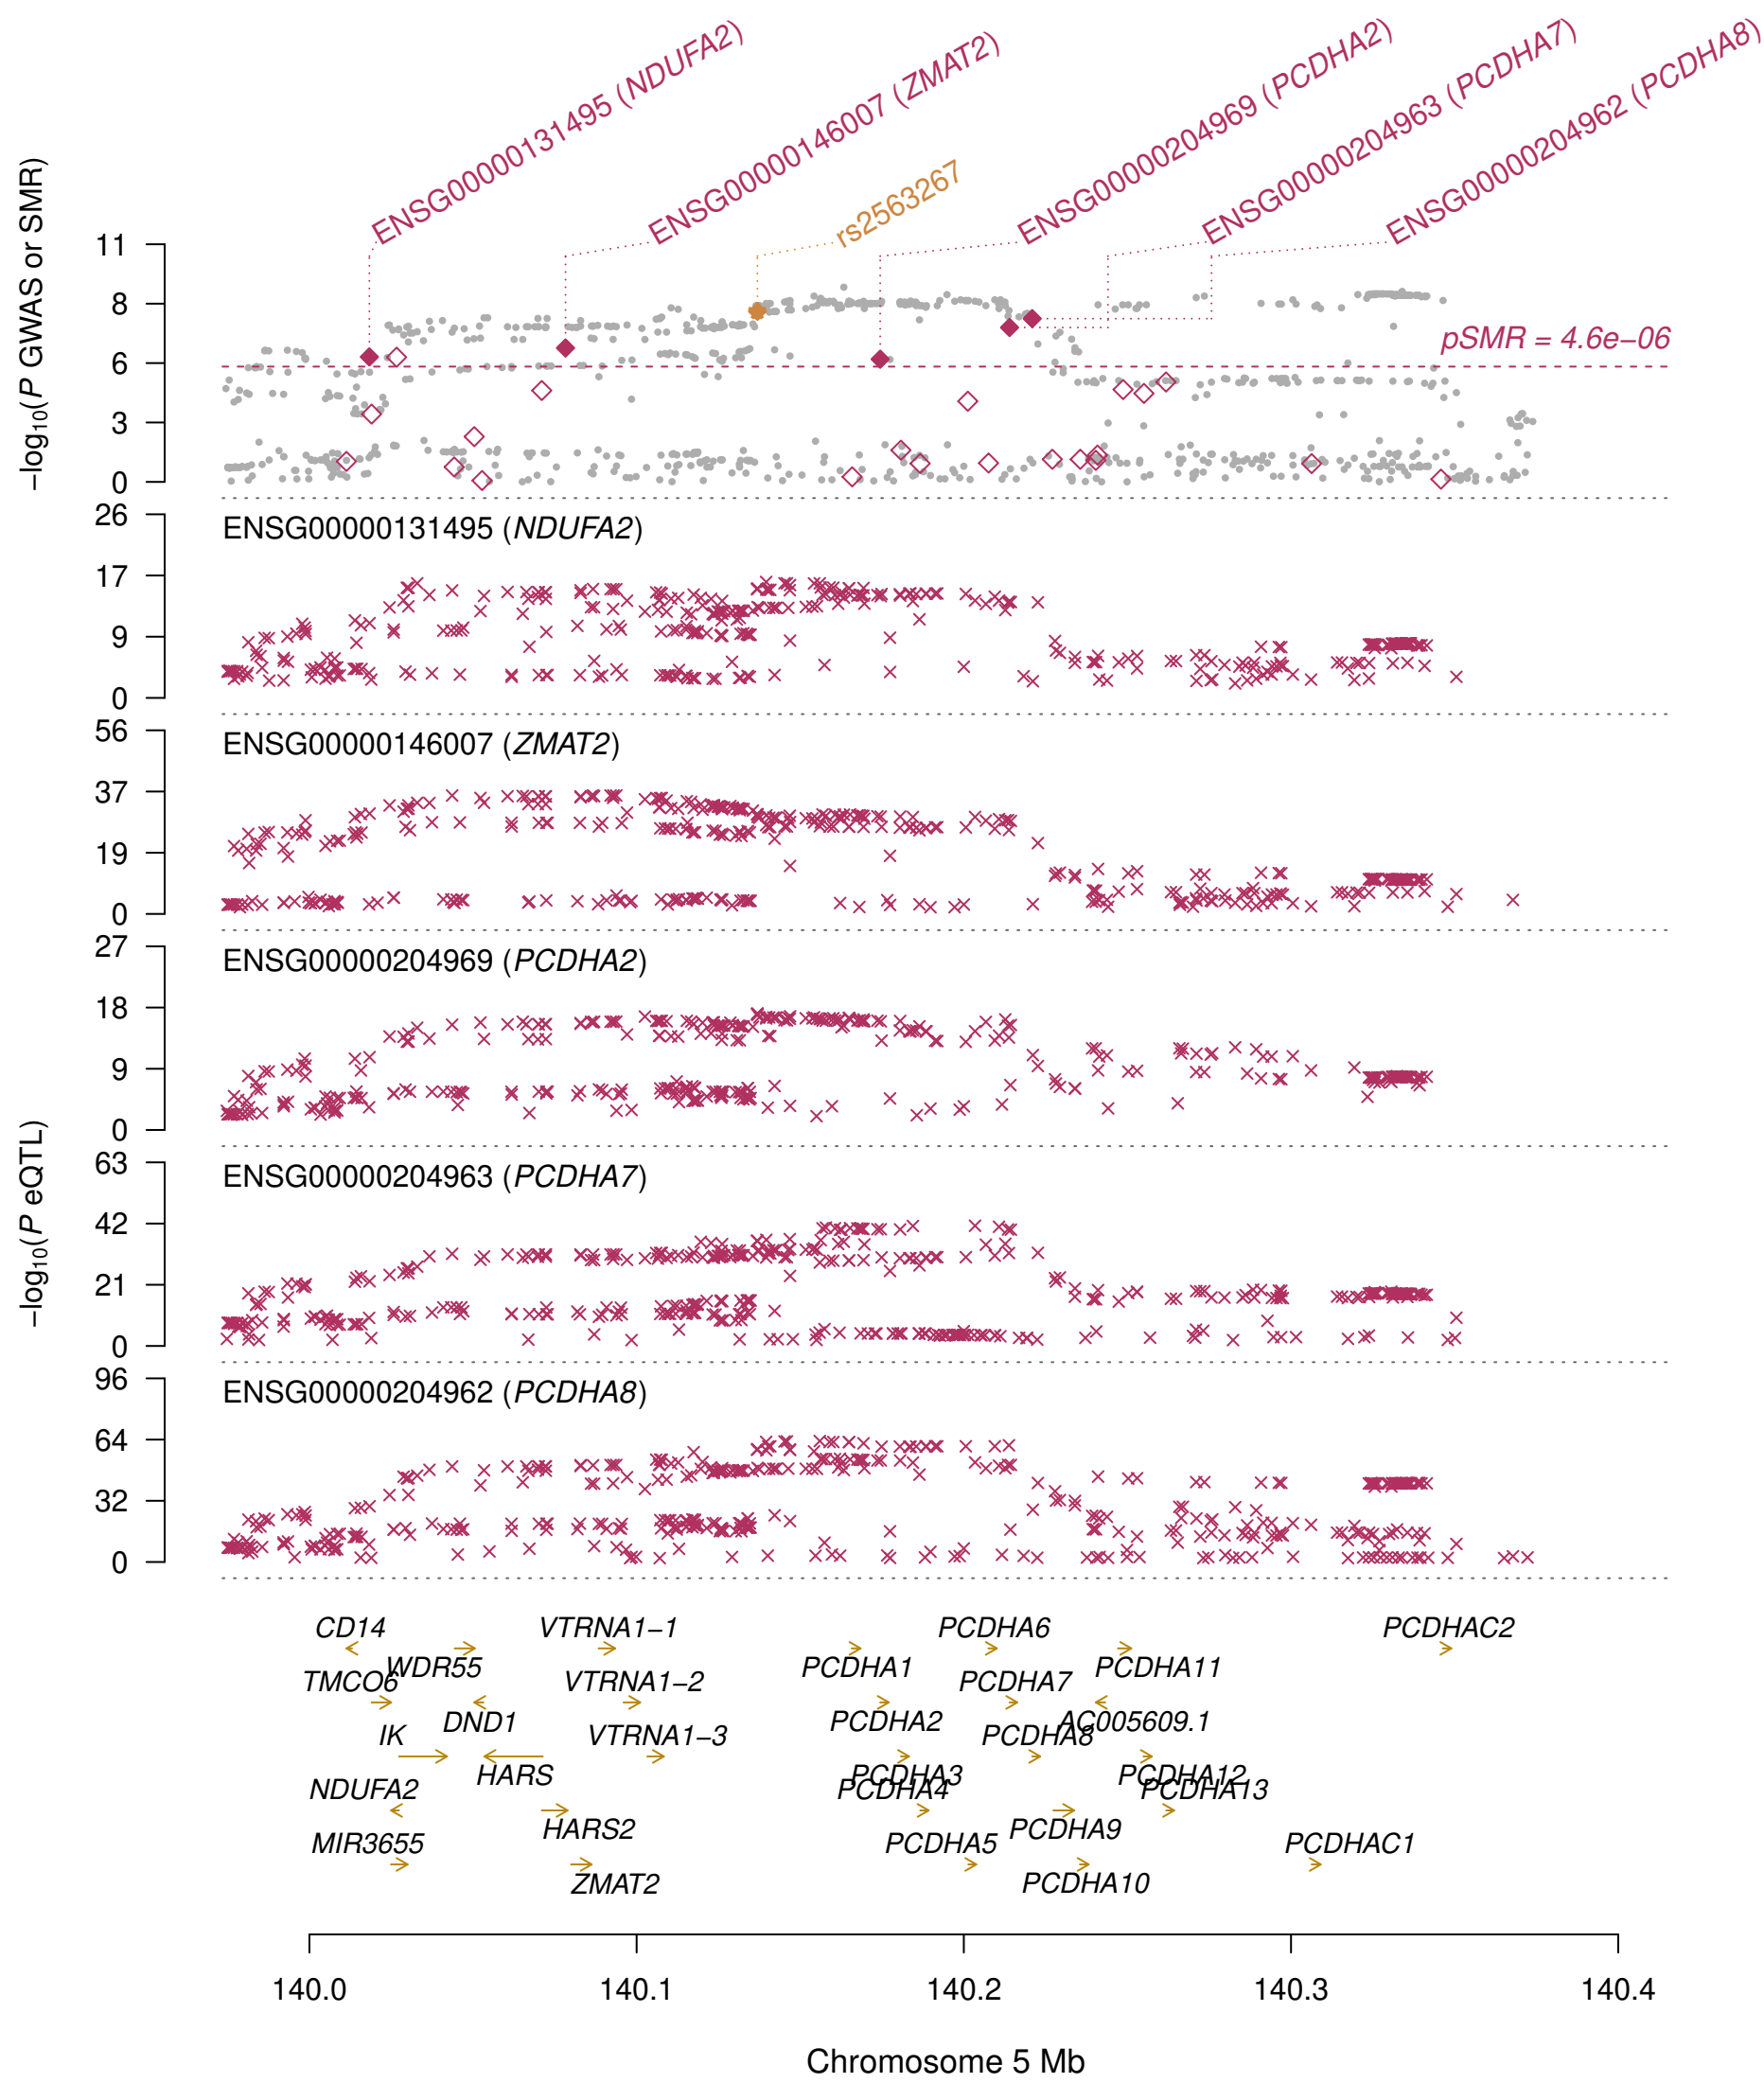

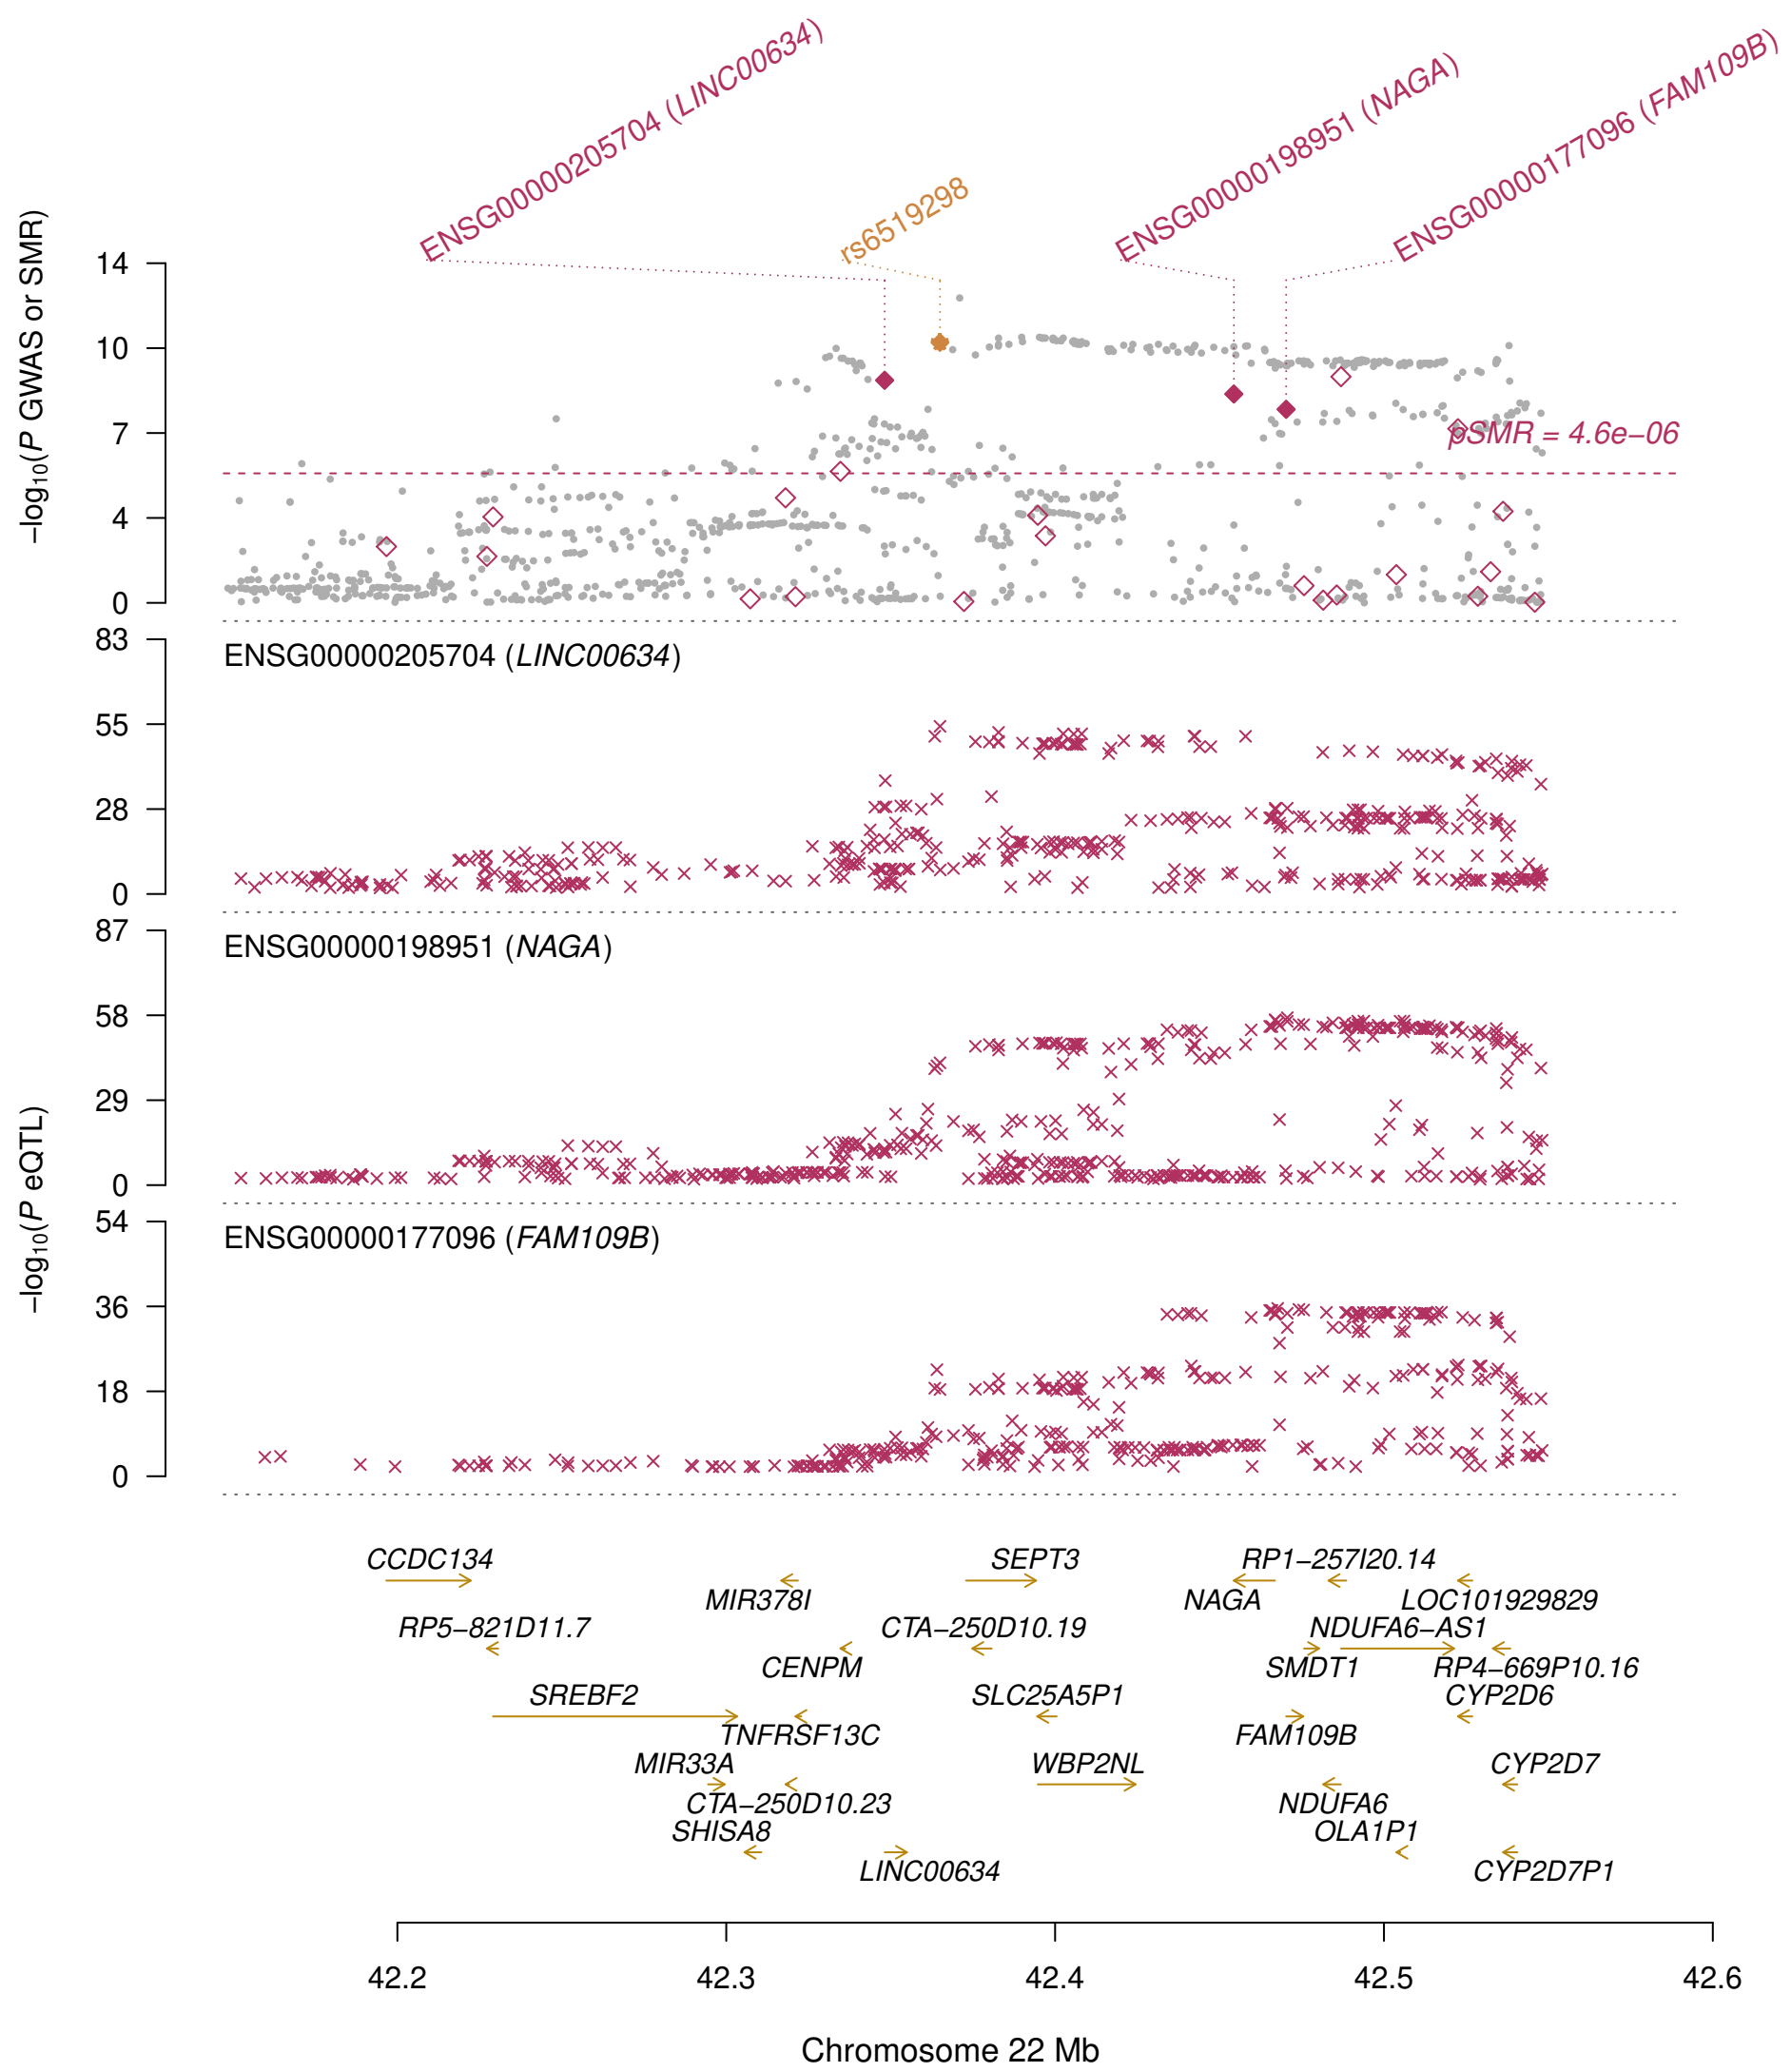

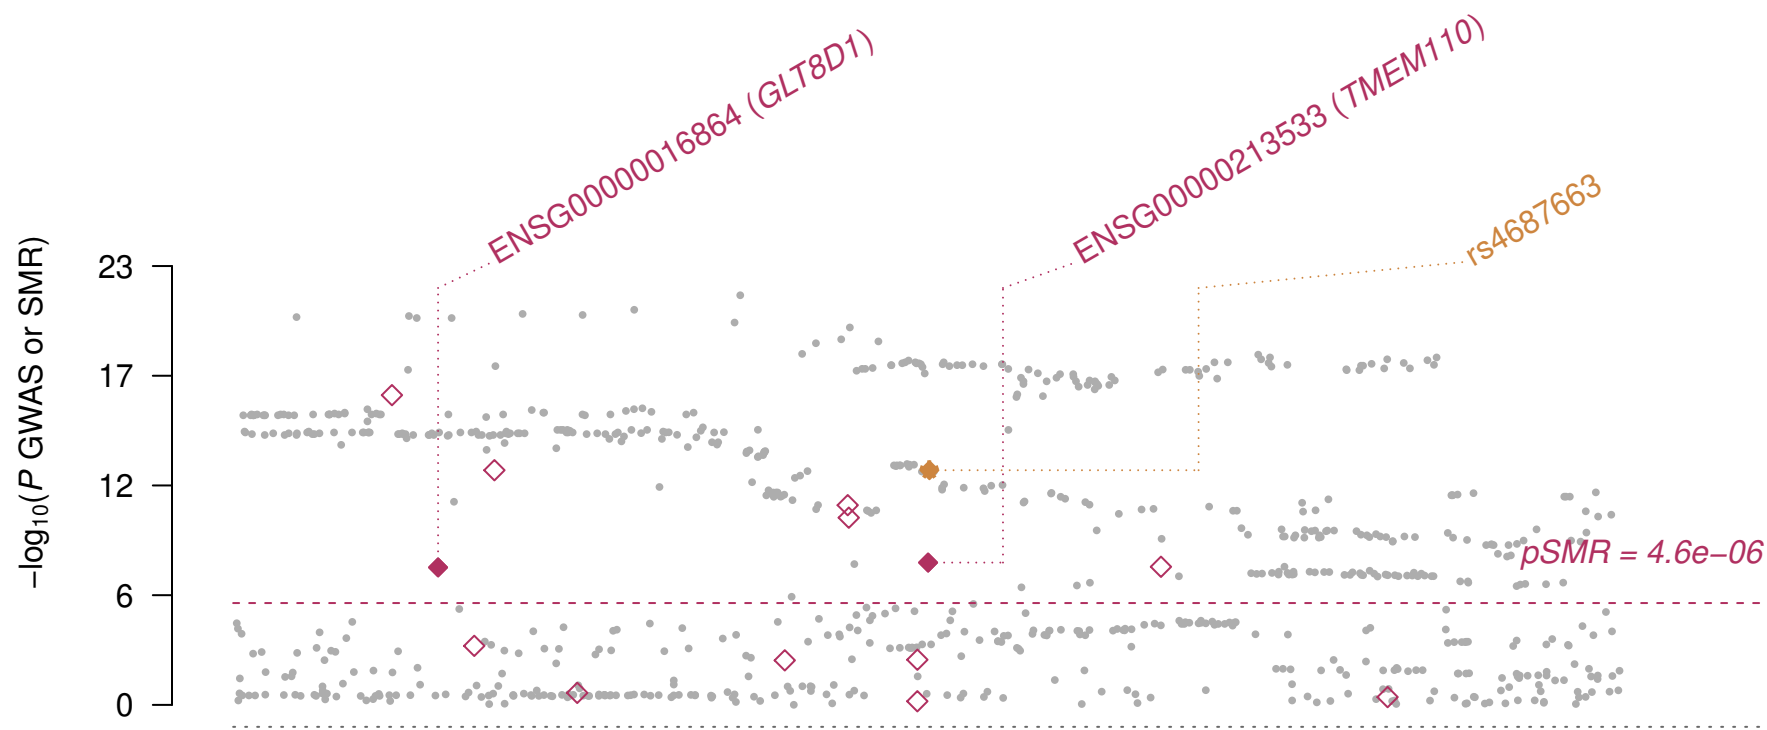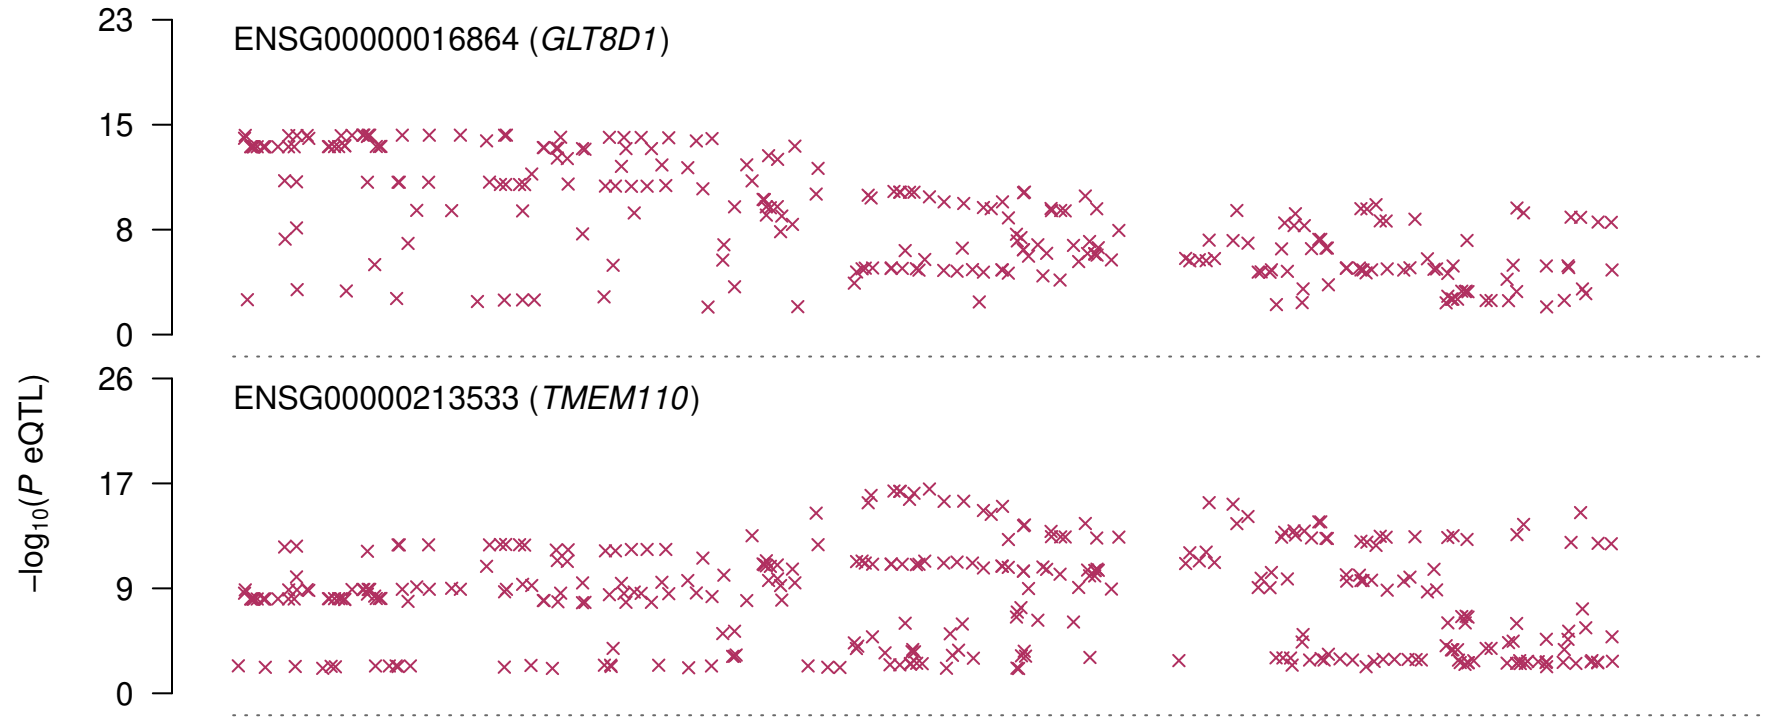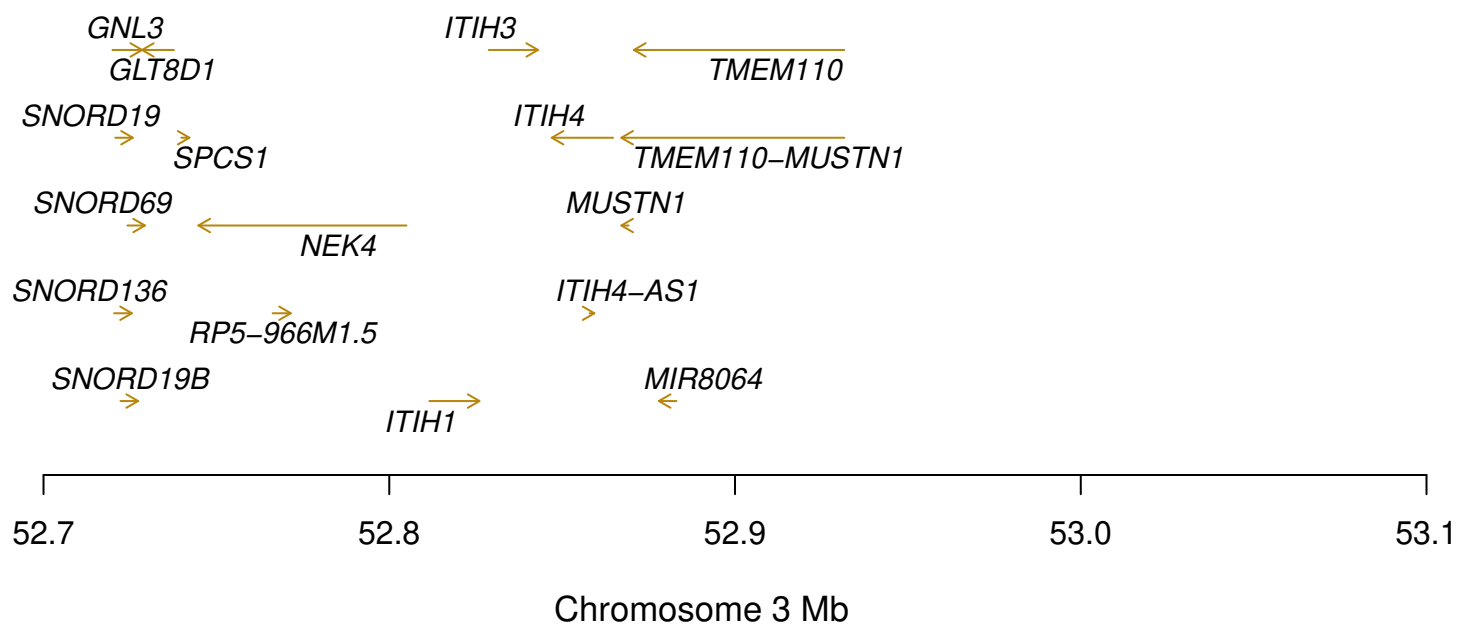

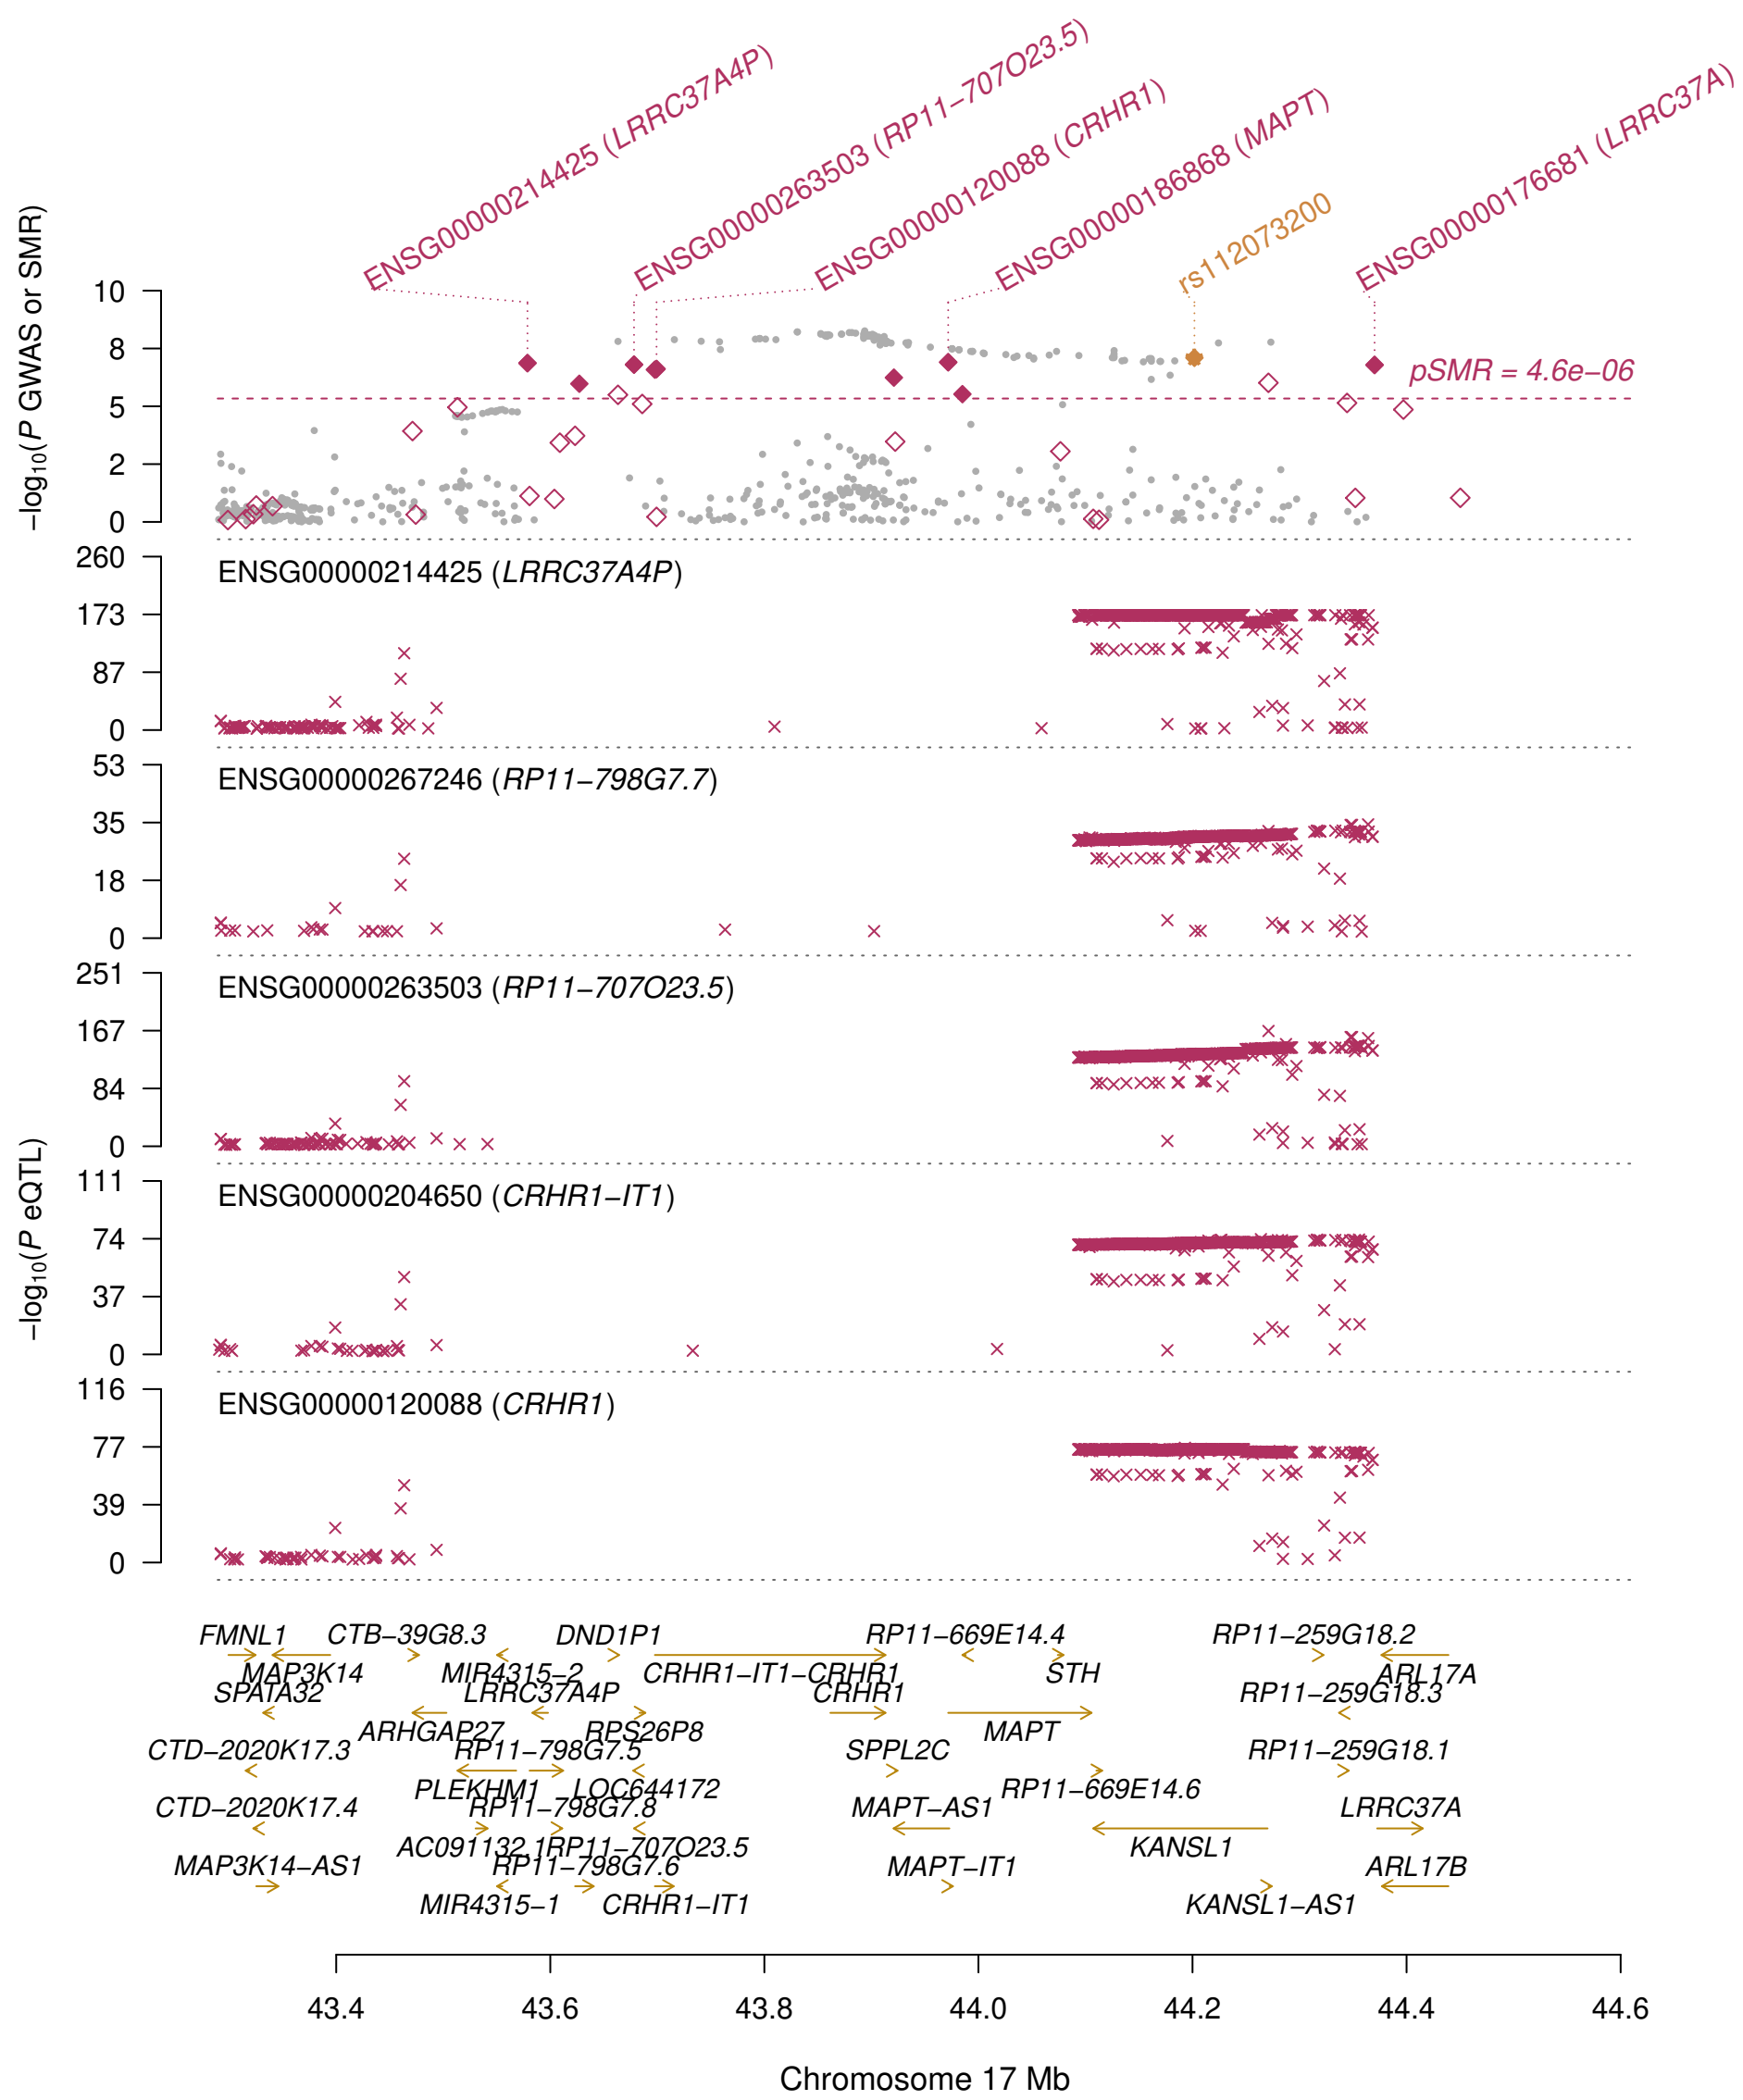



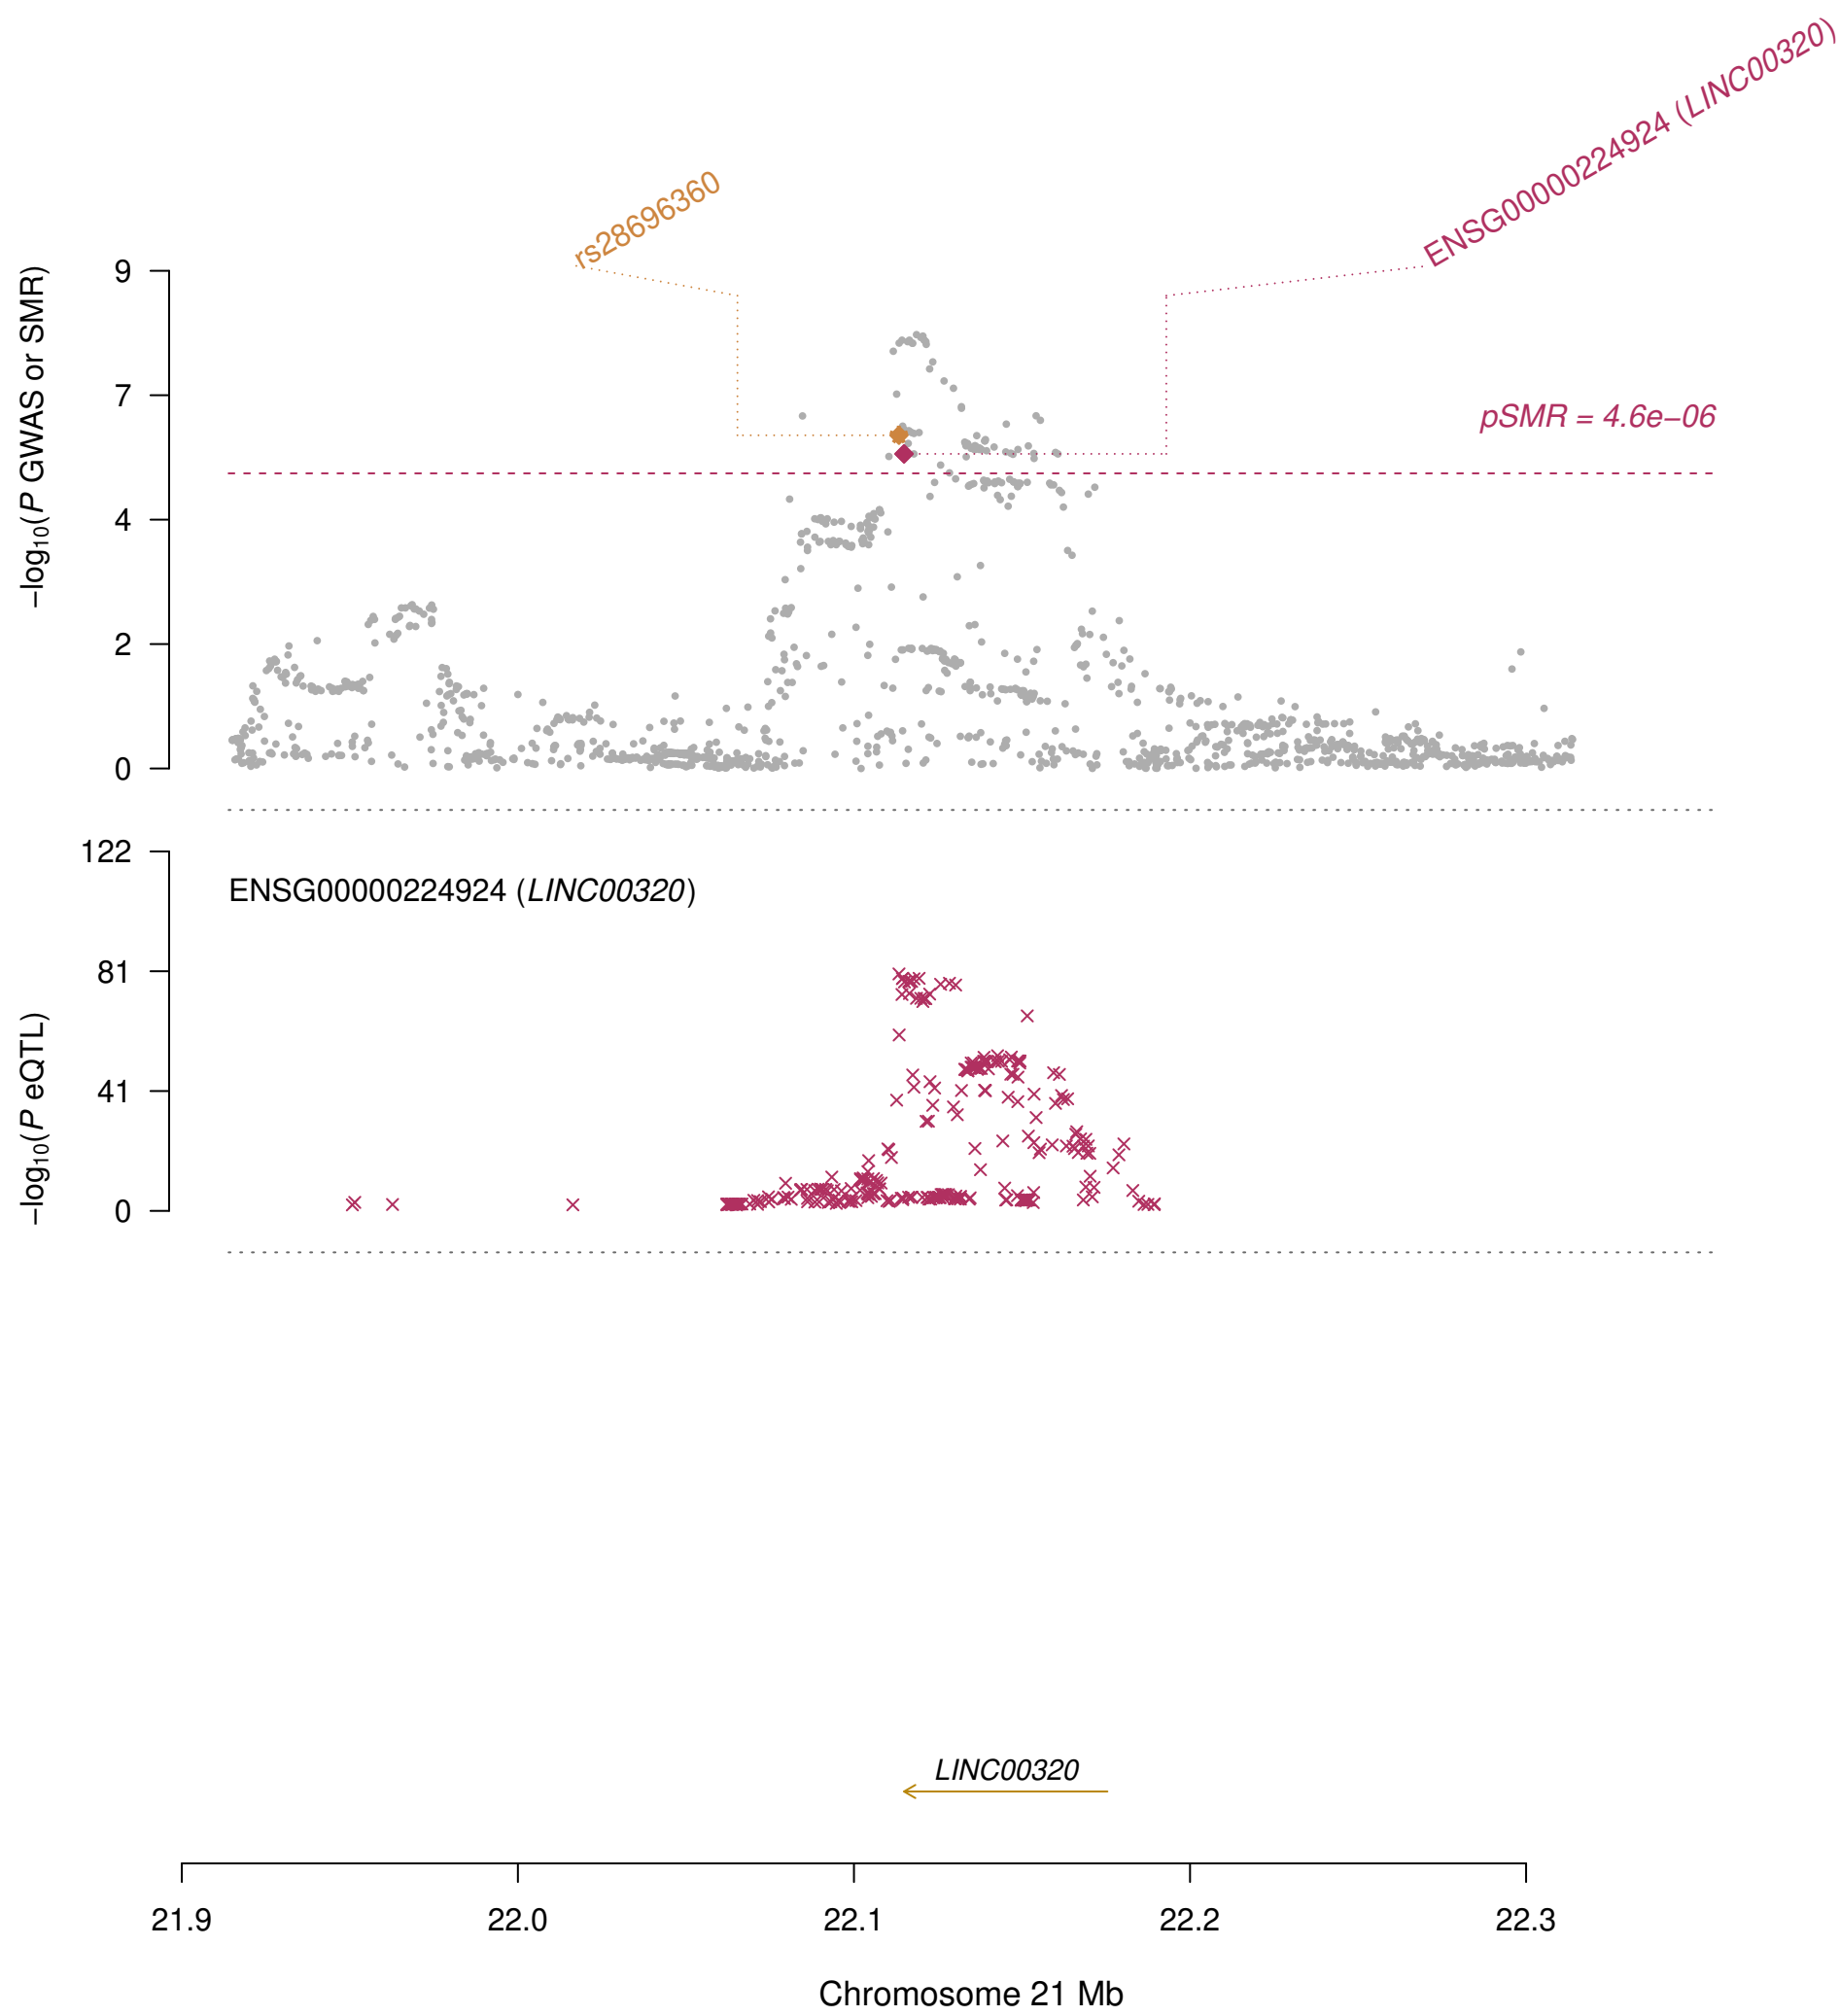

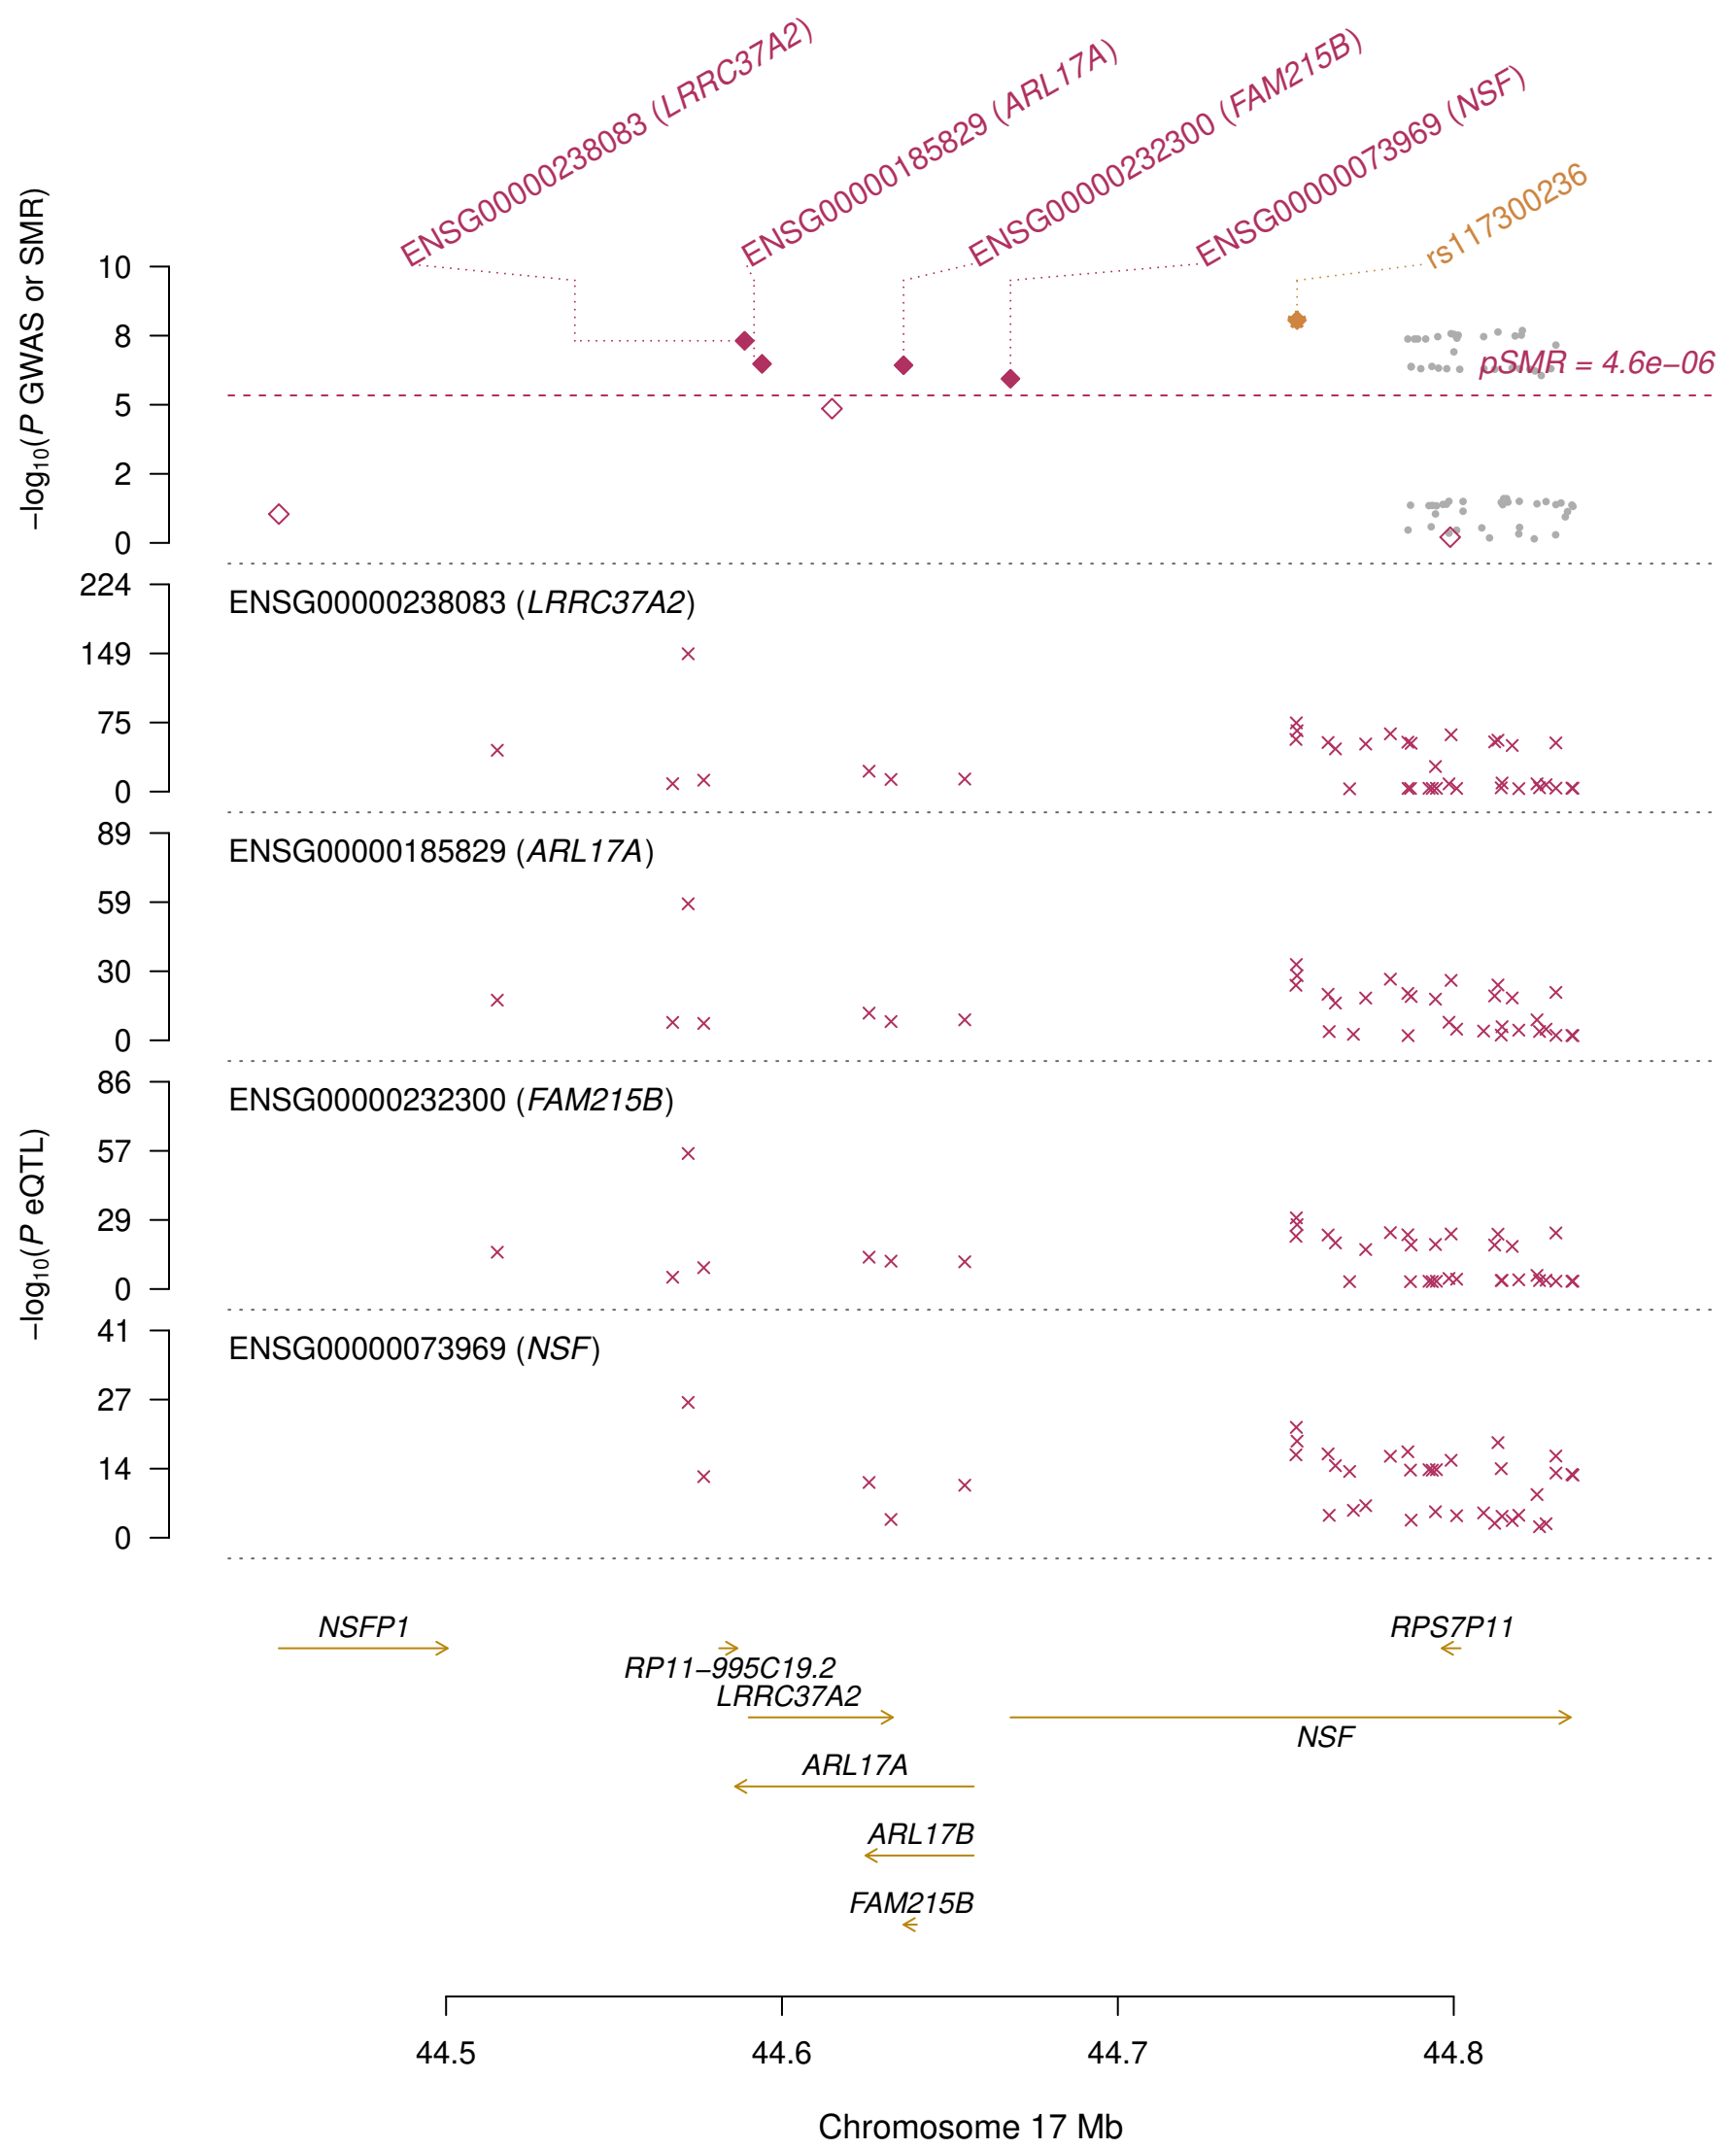

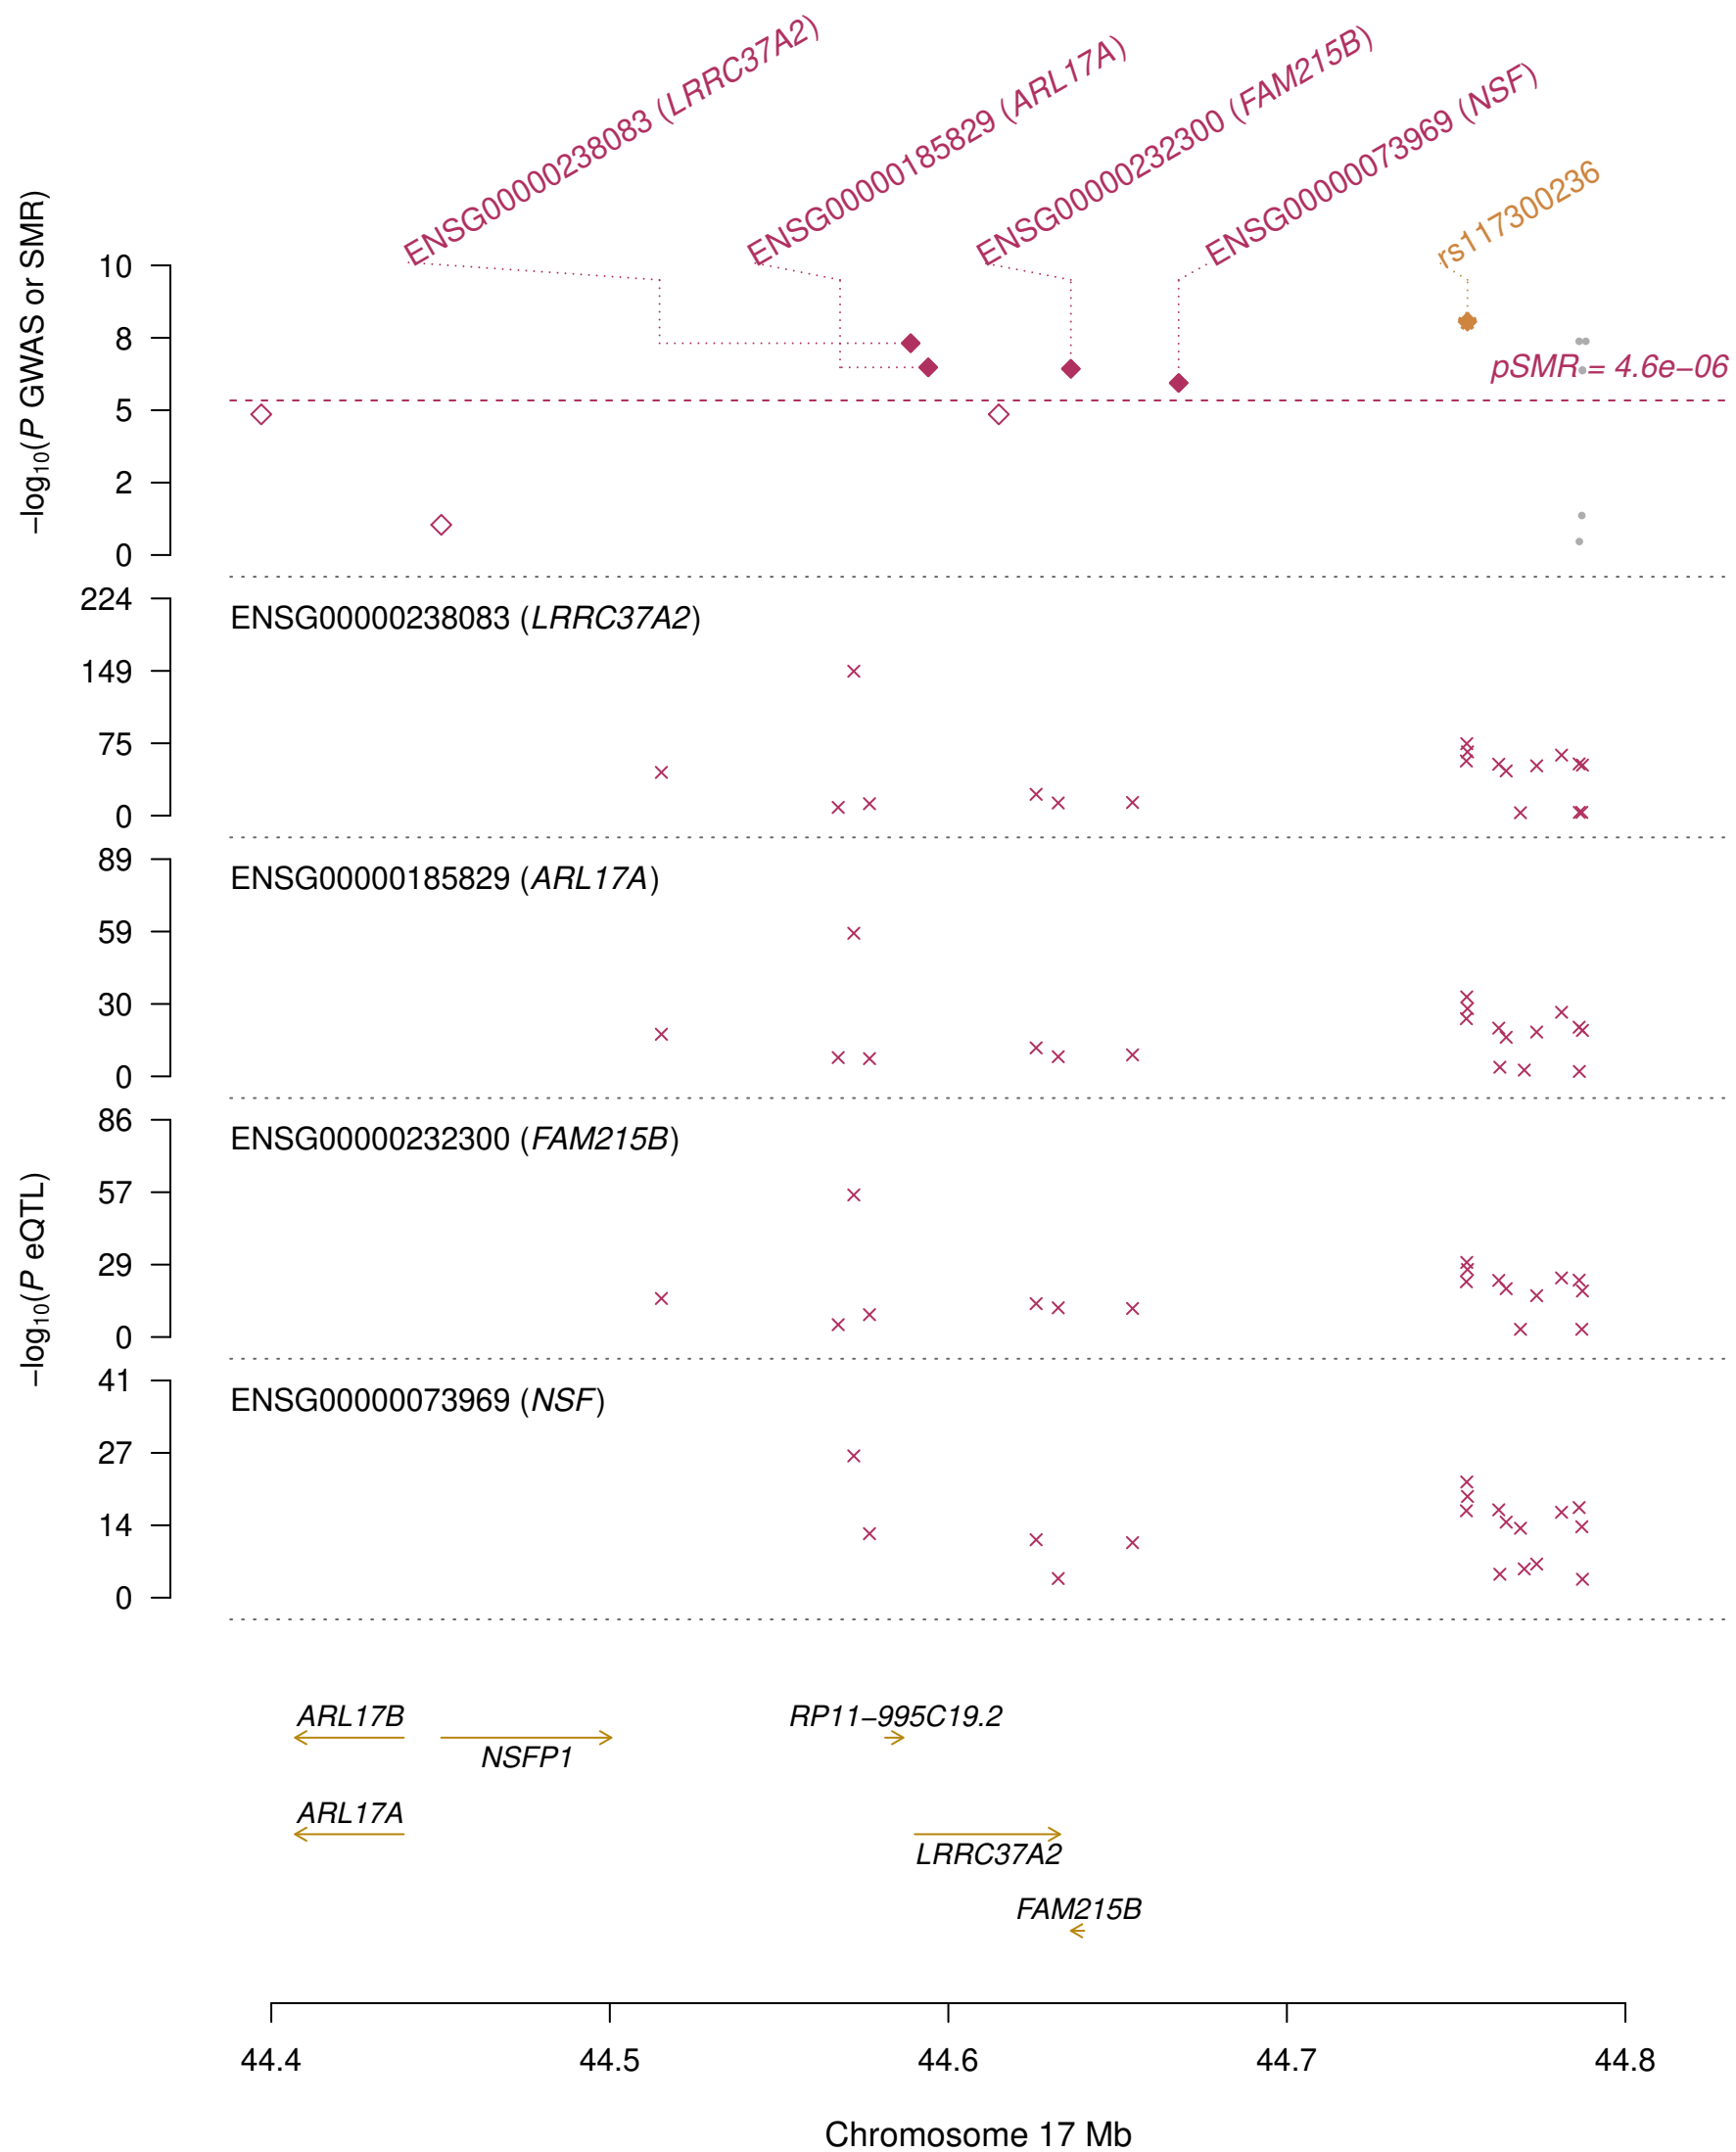

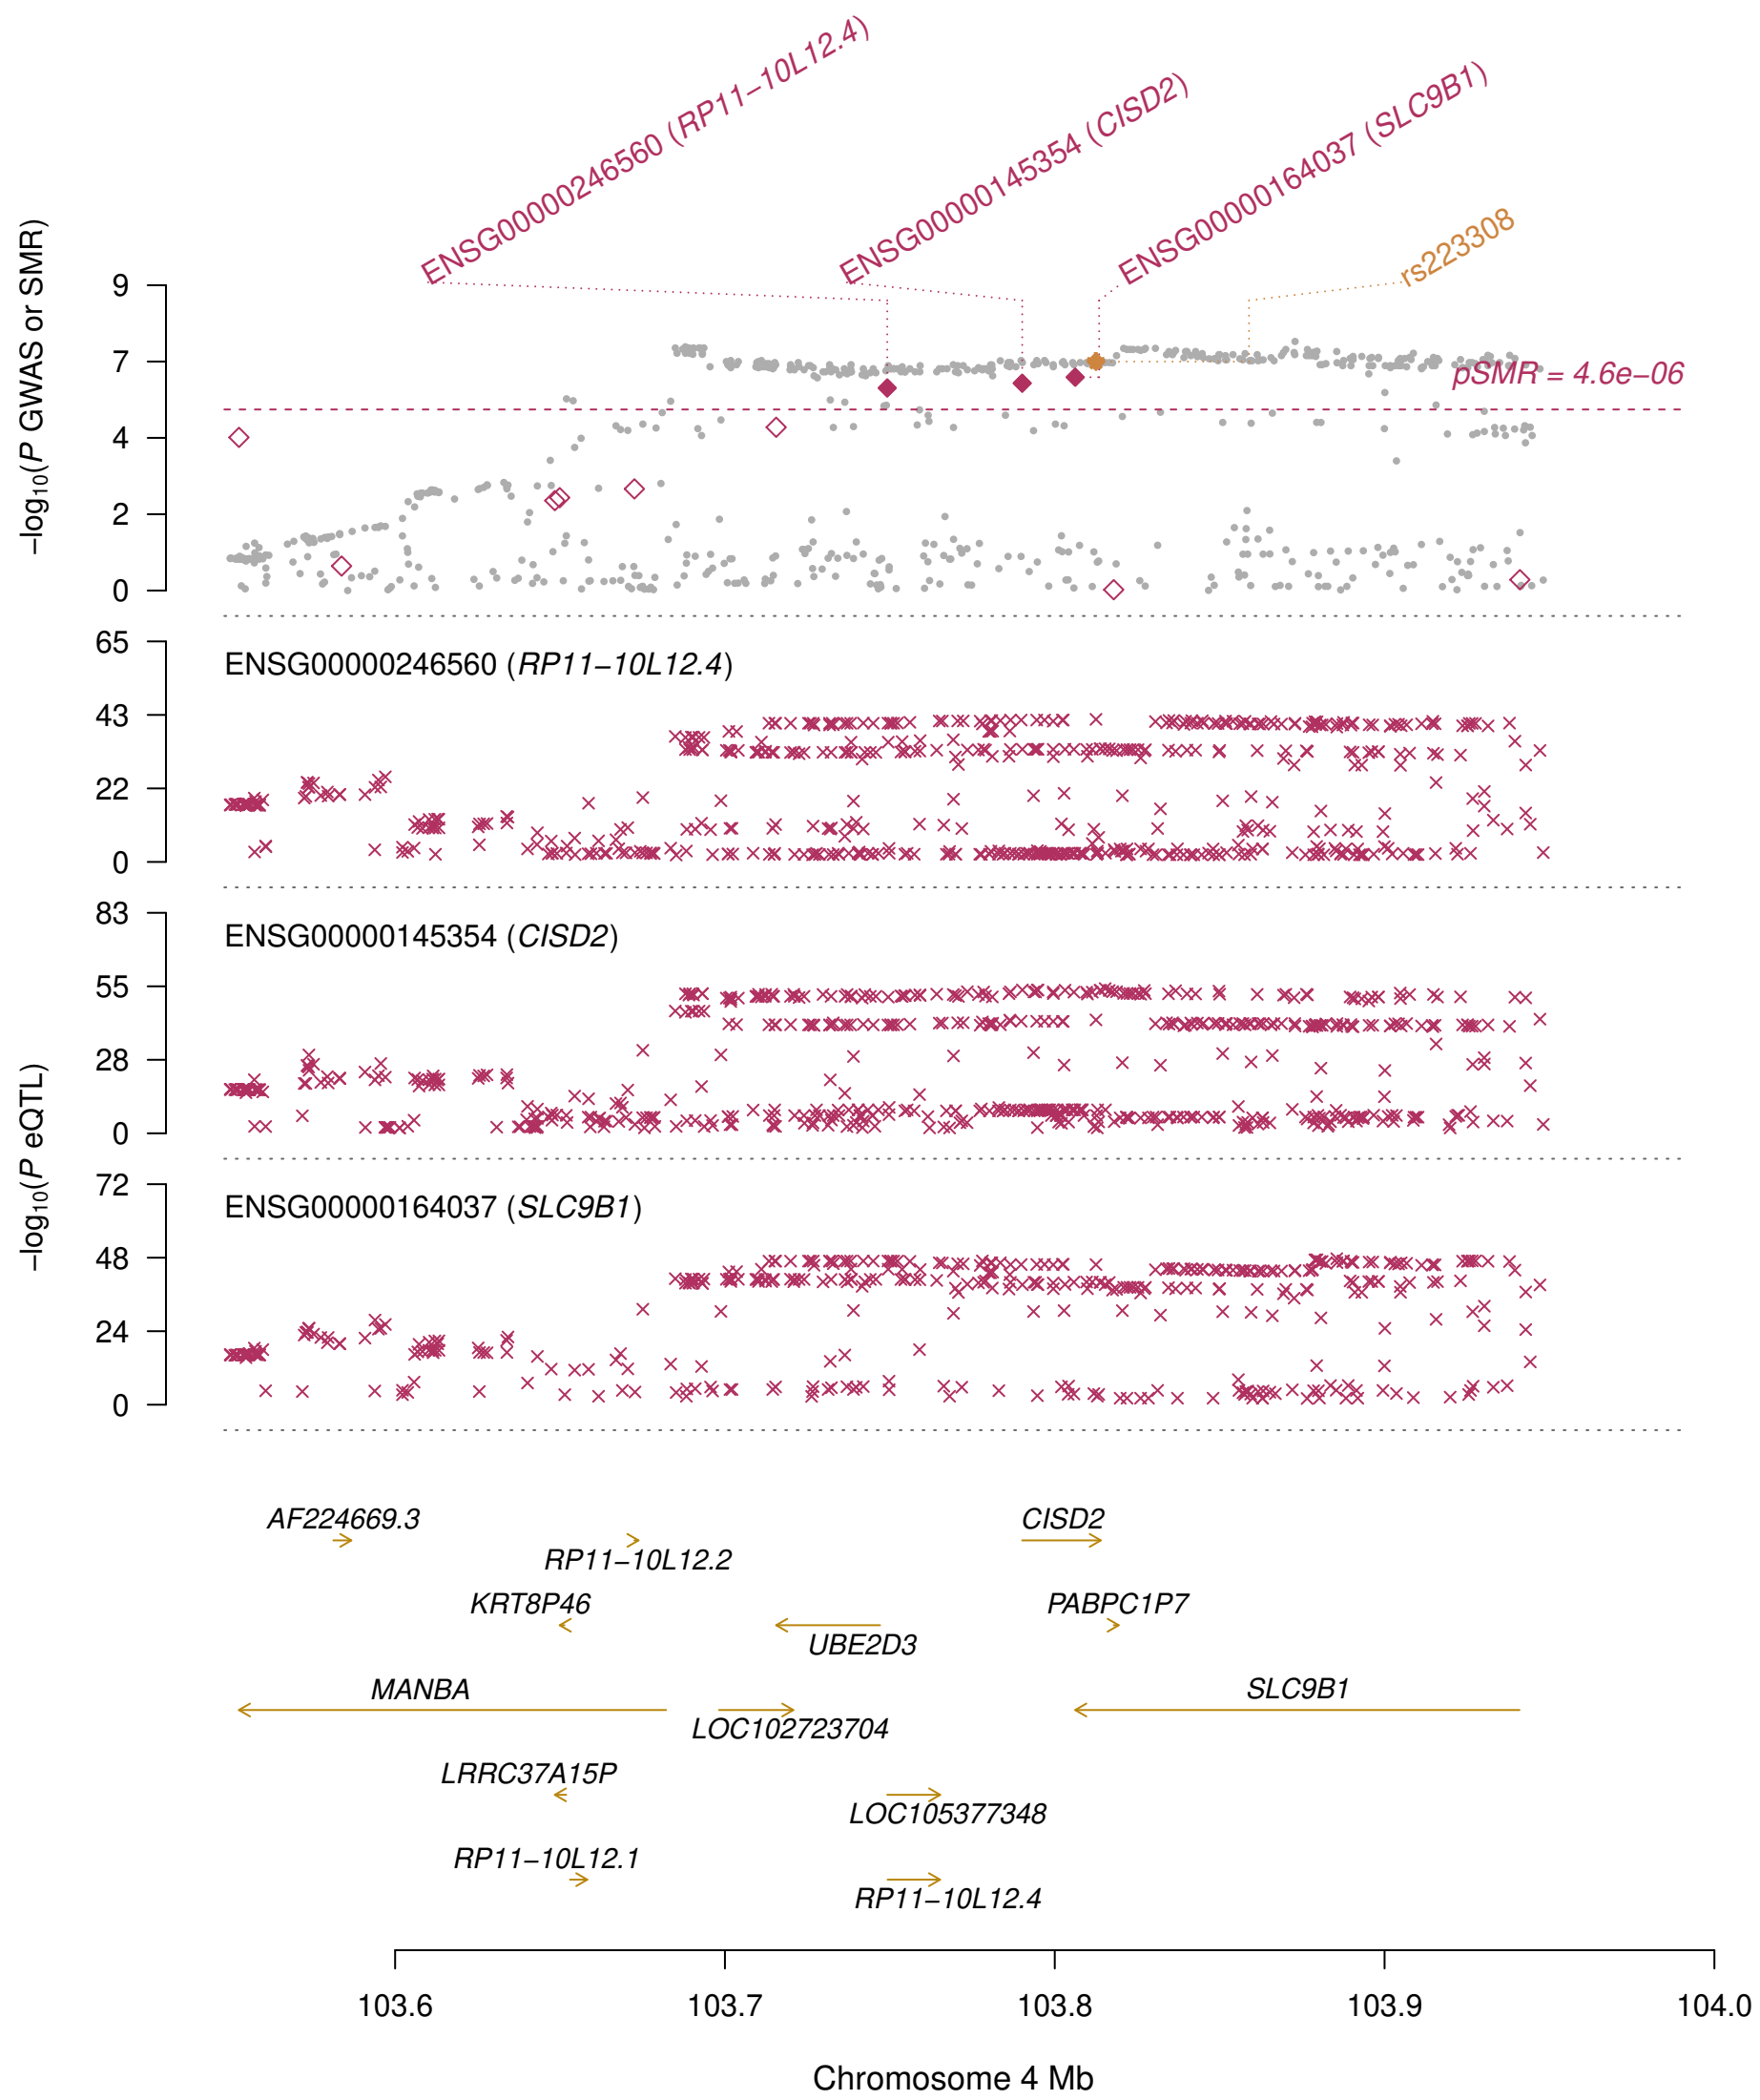

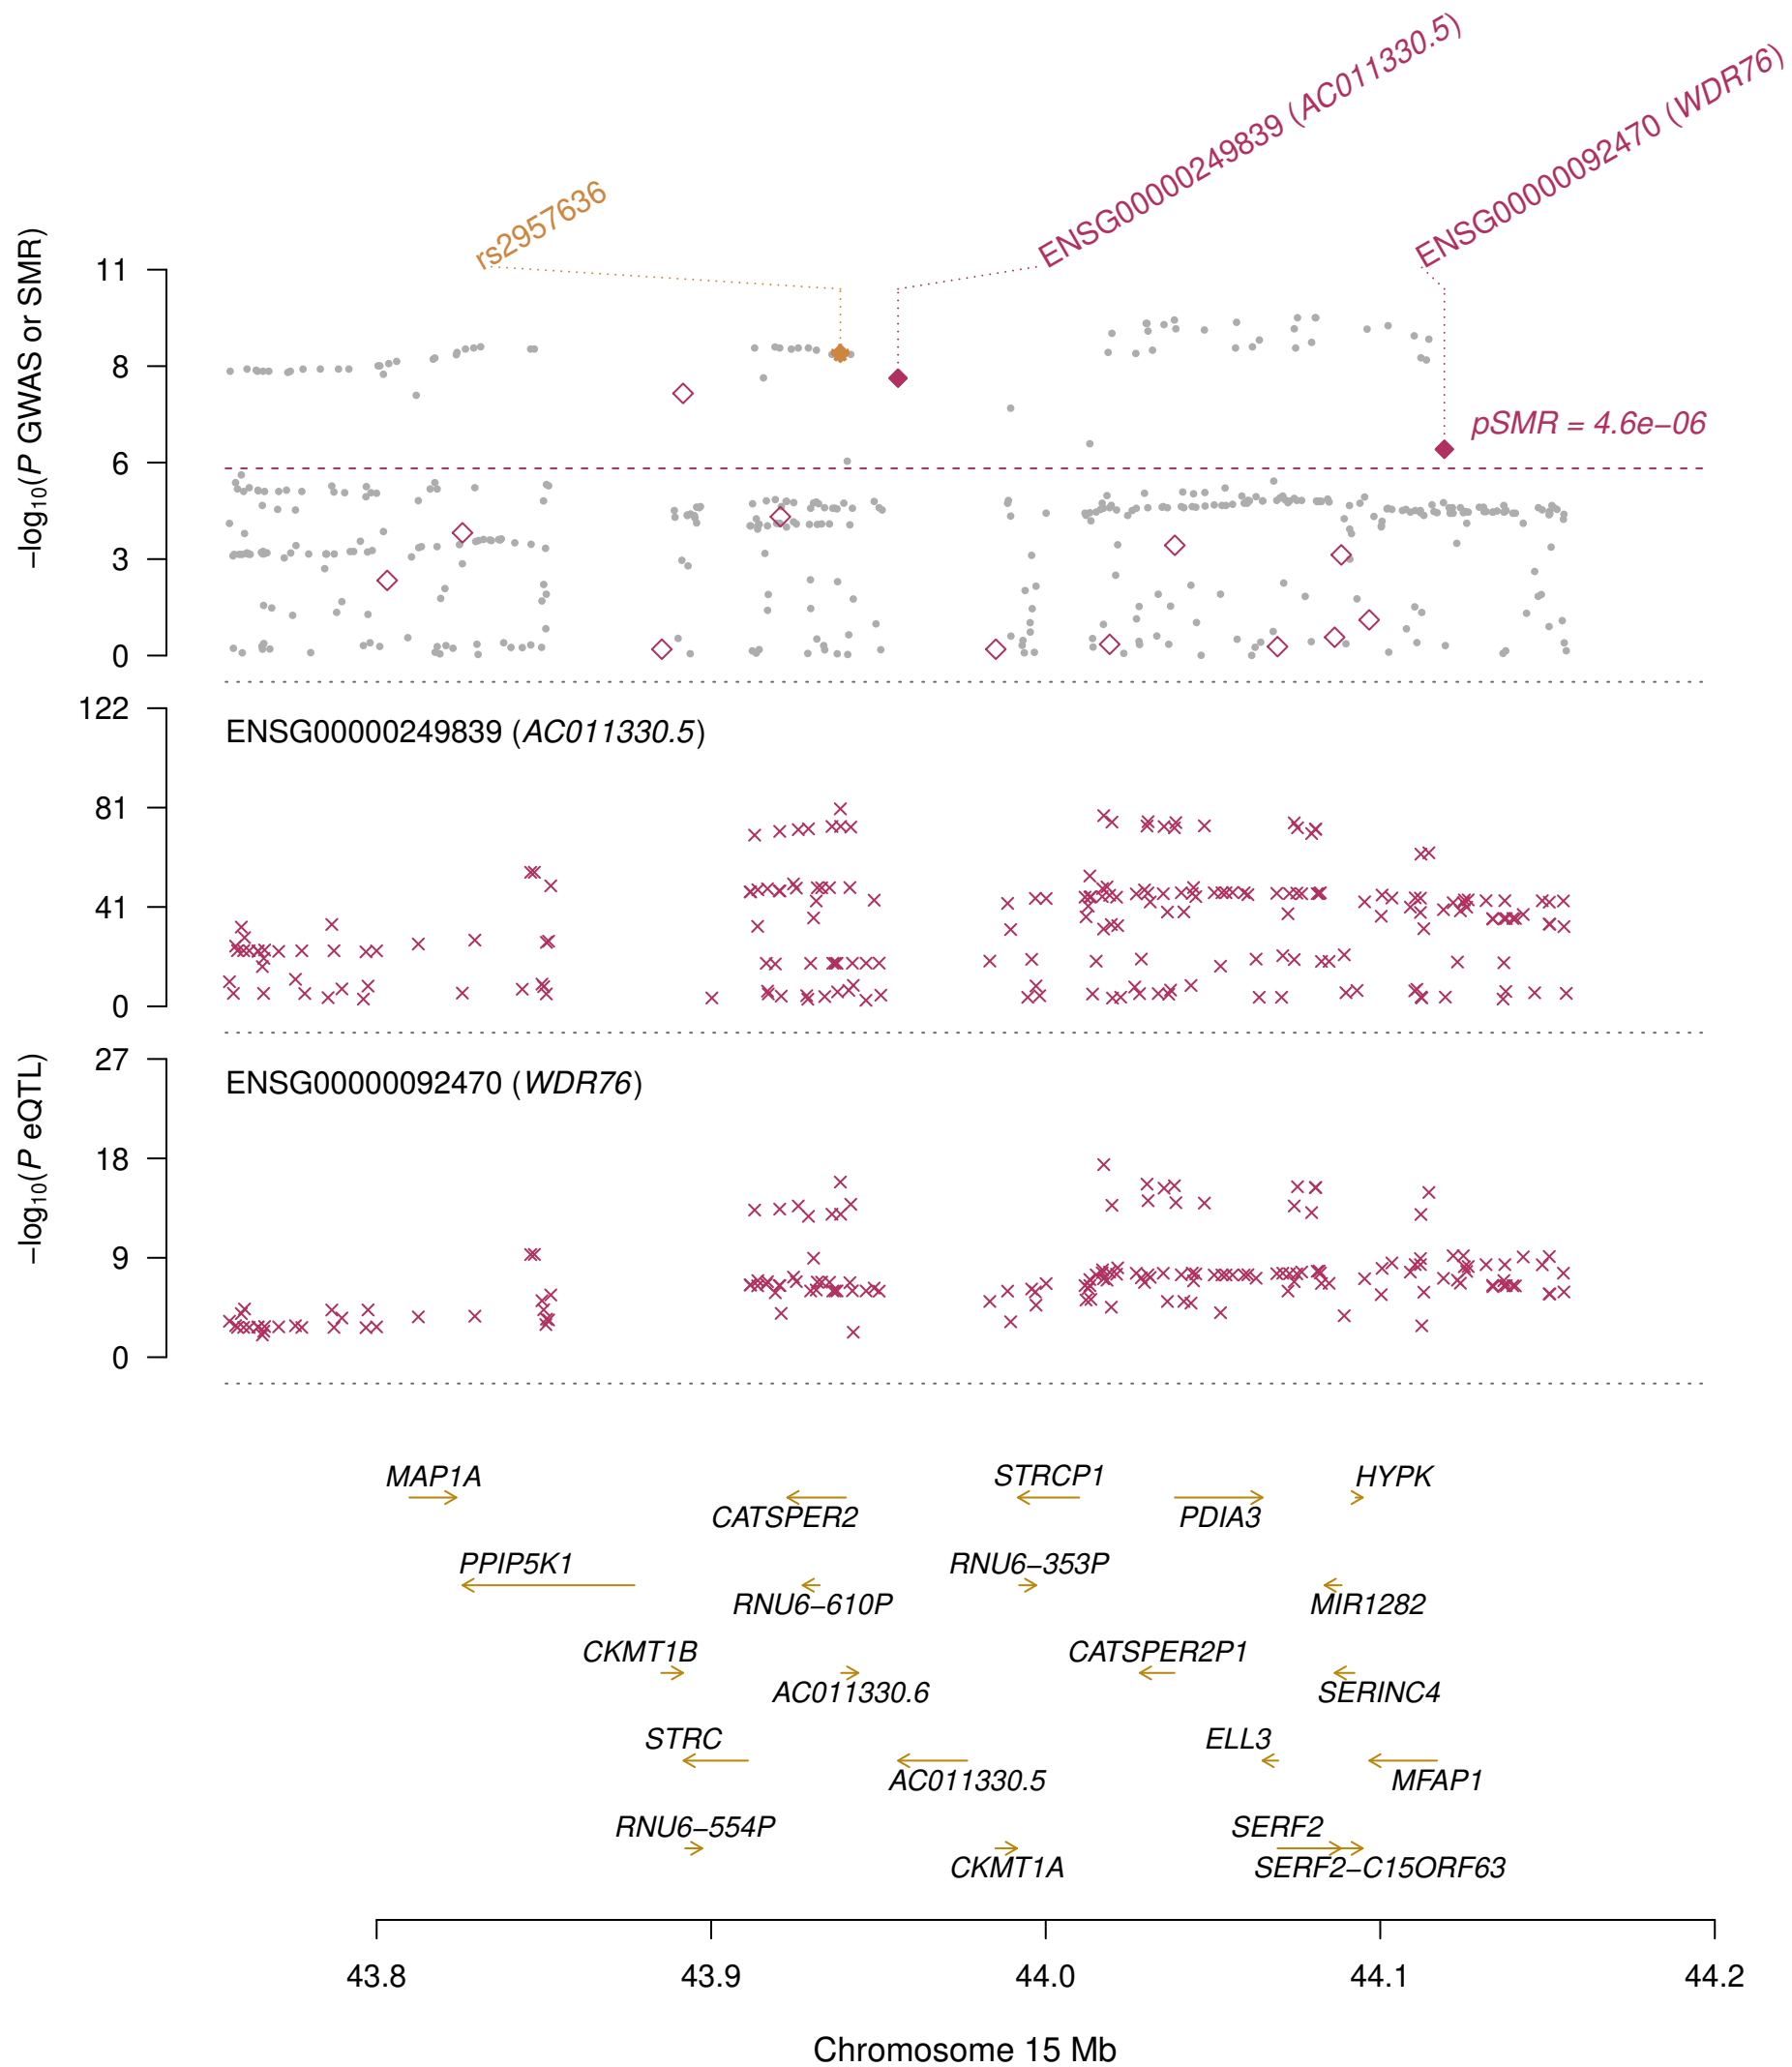

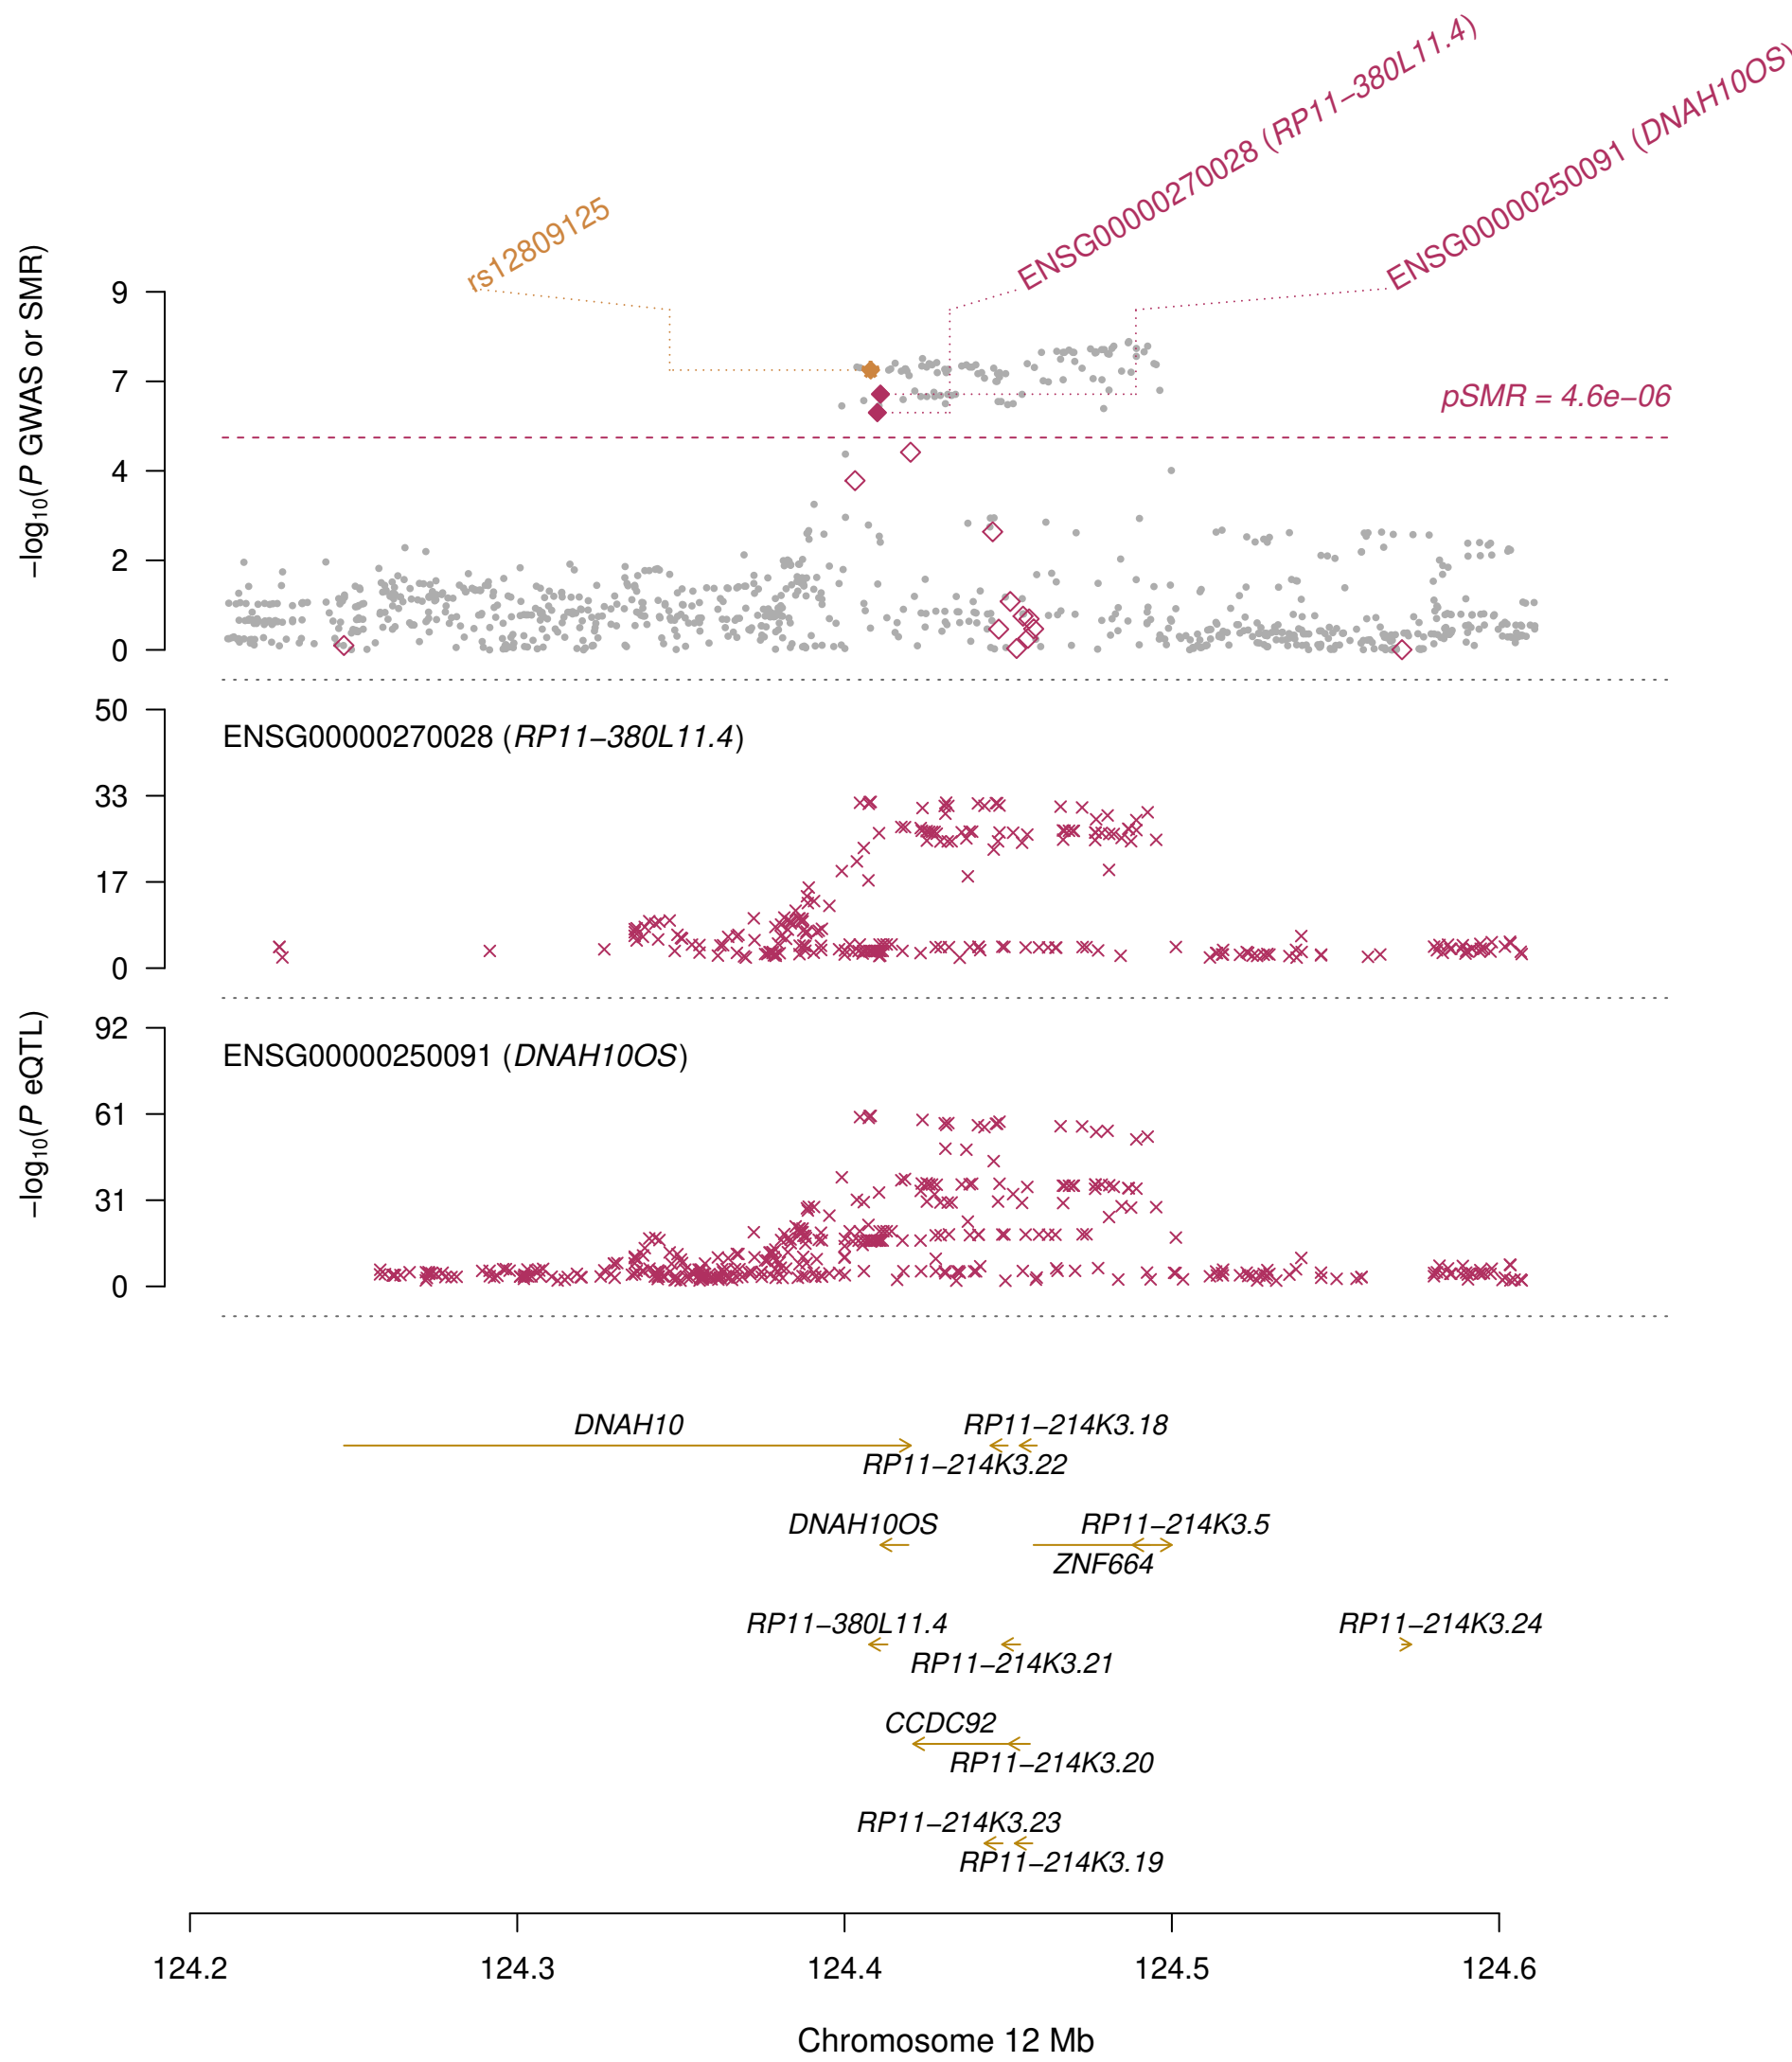

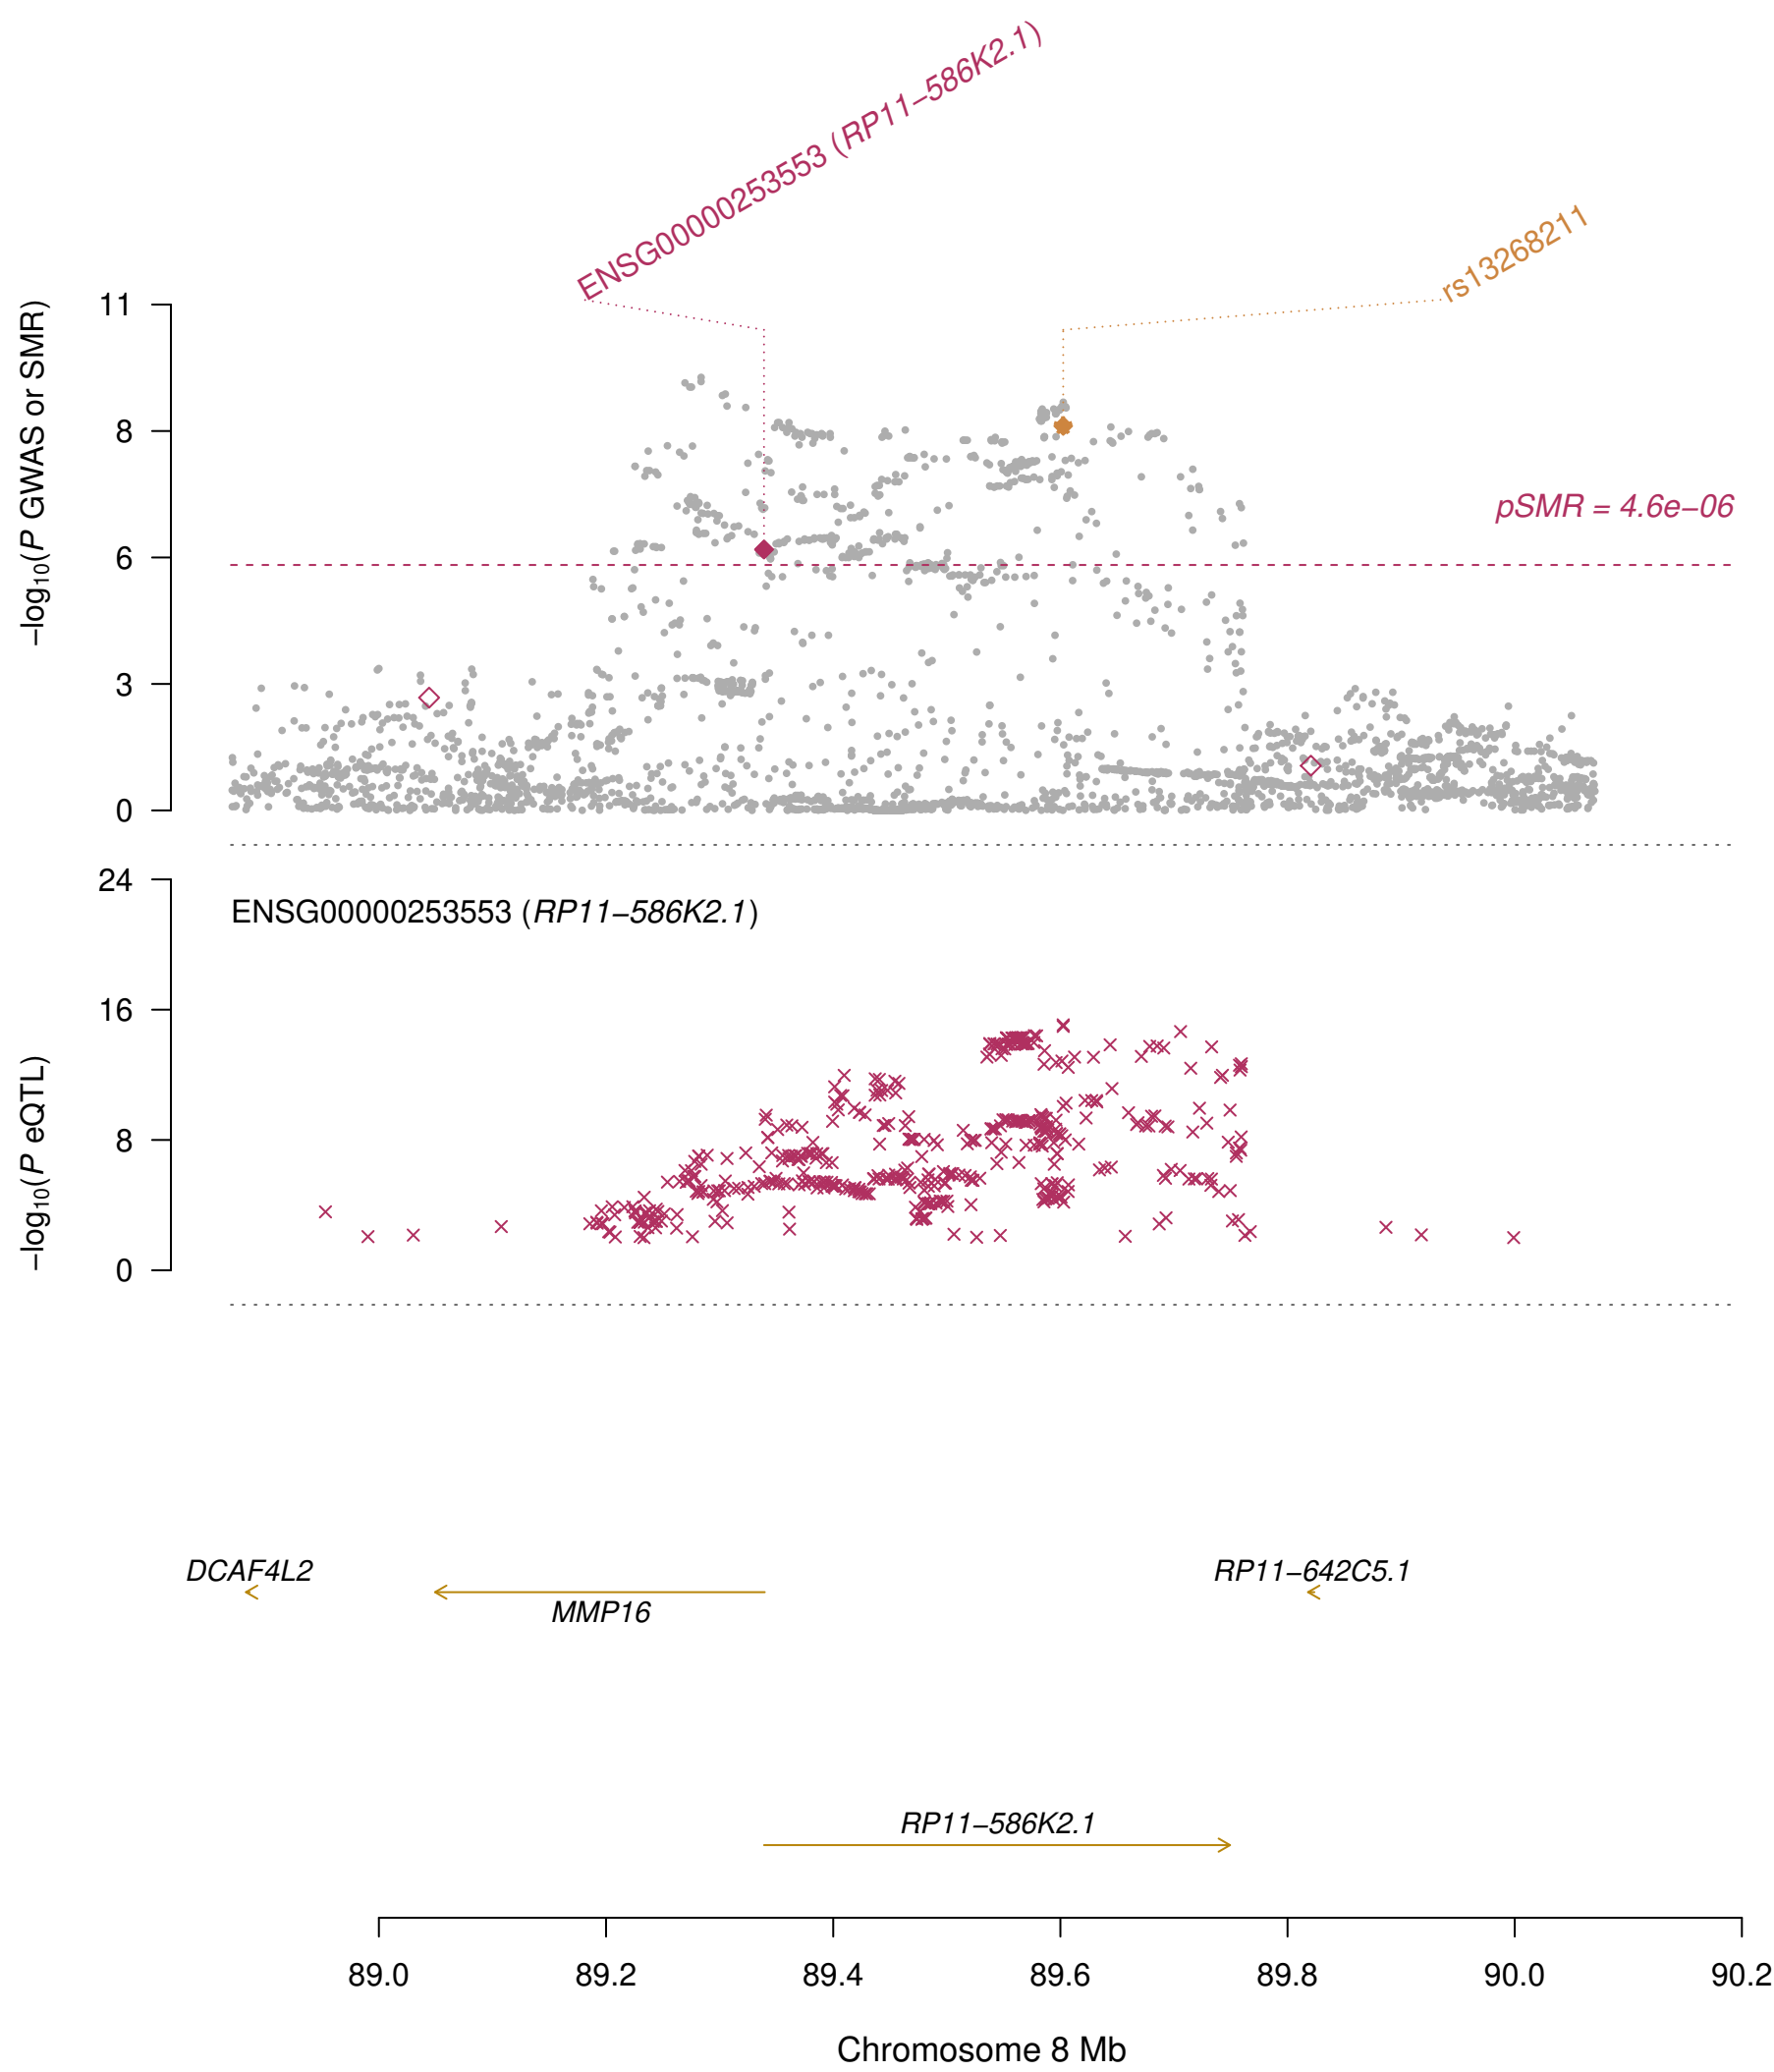

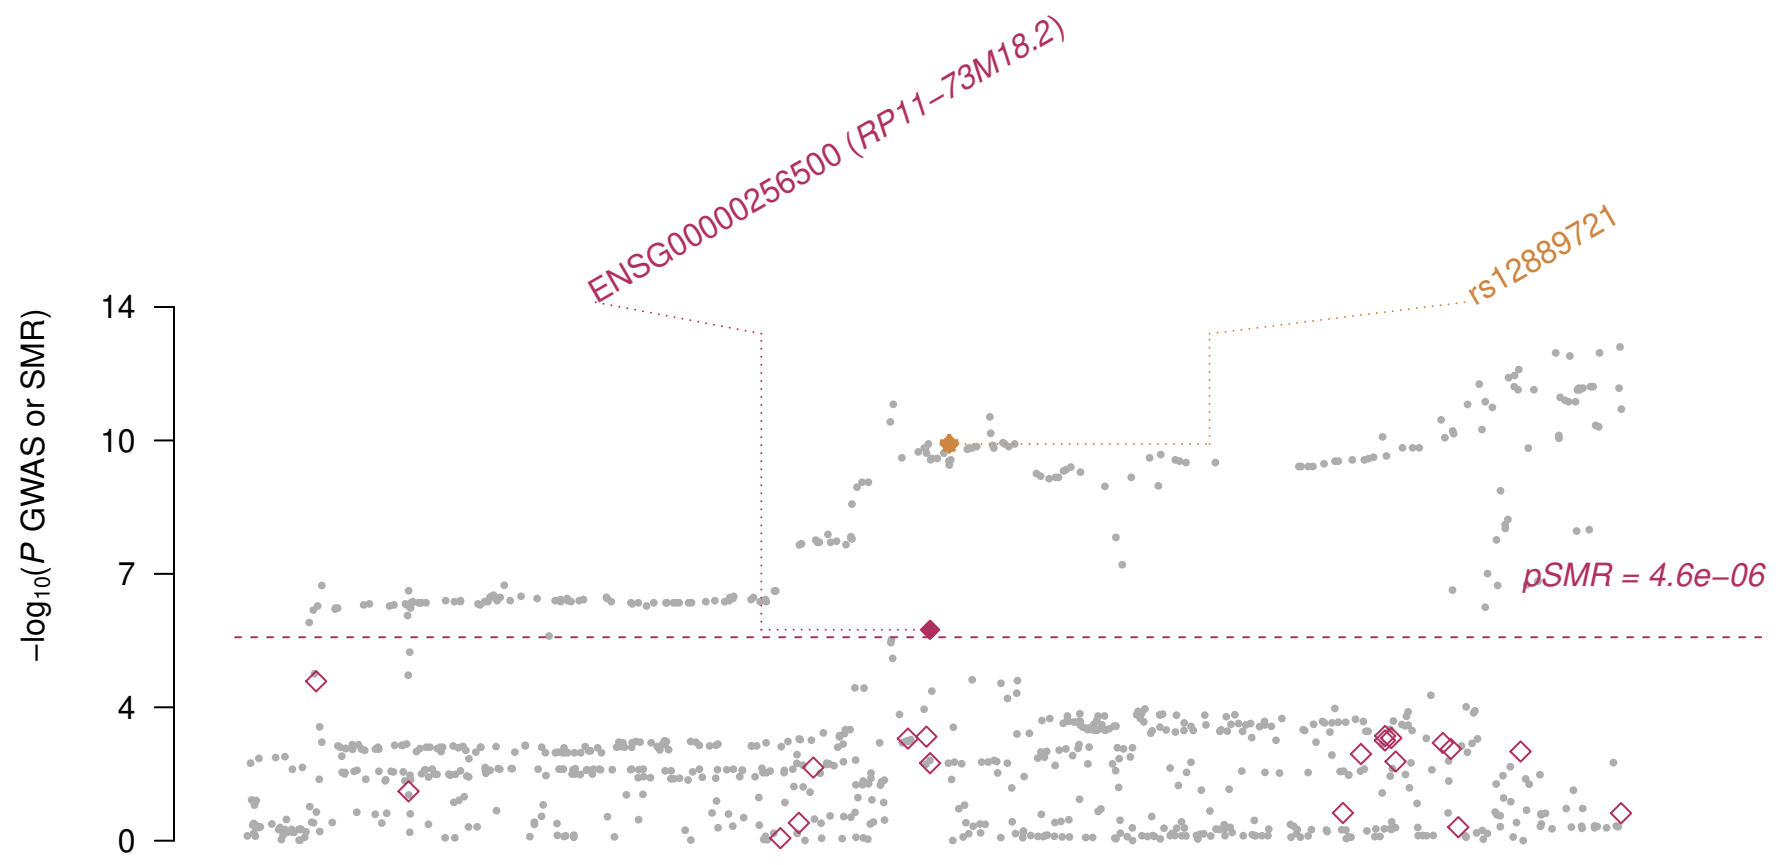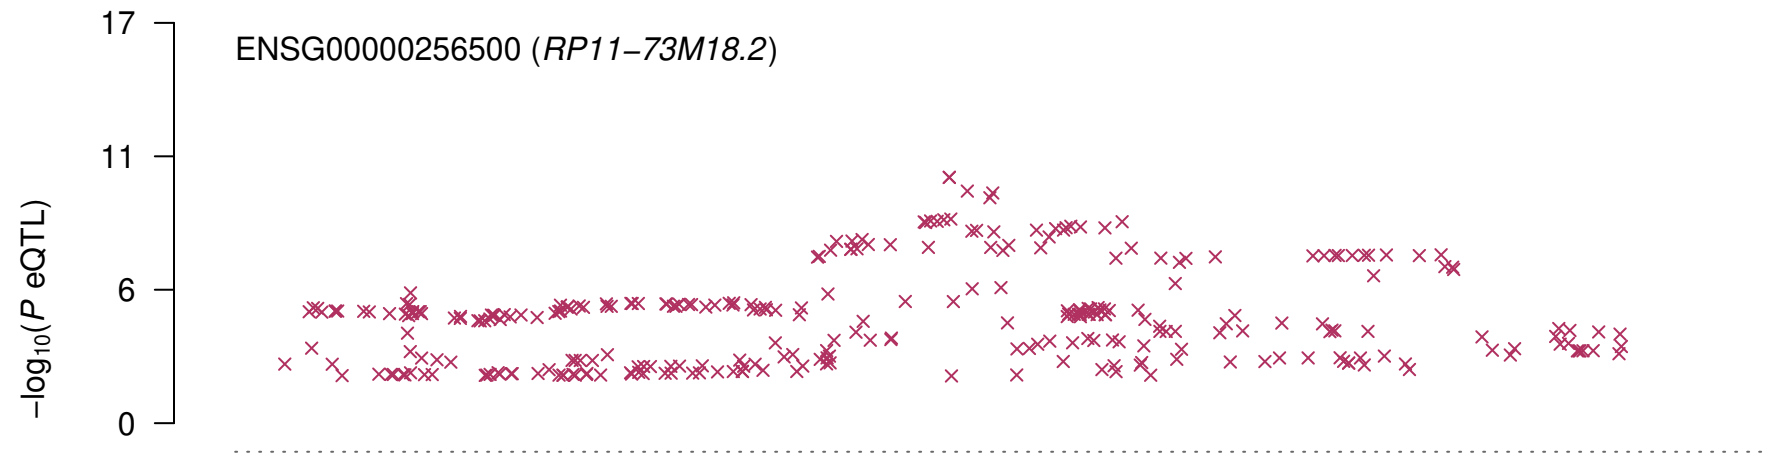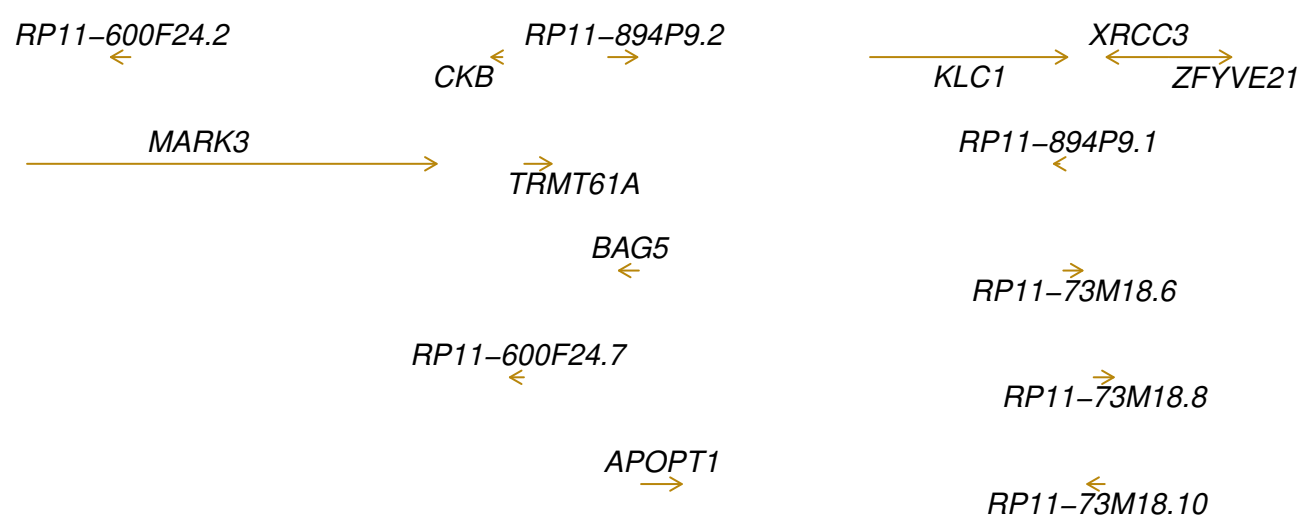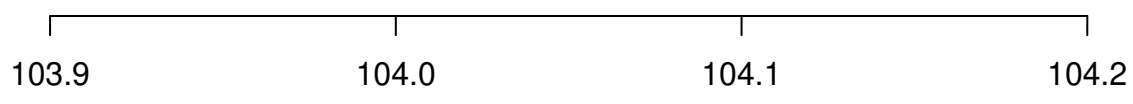

Chromosome 14 Mb



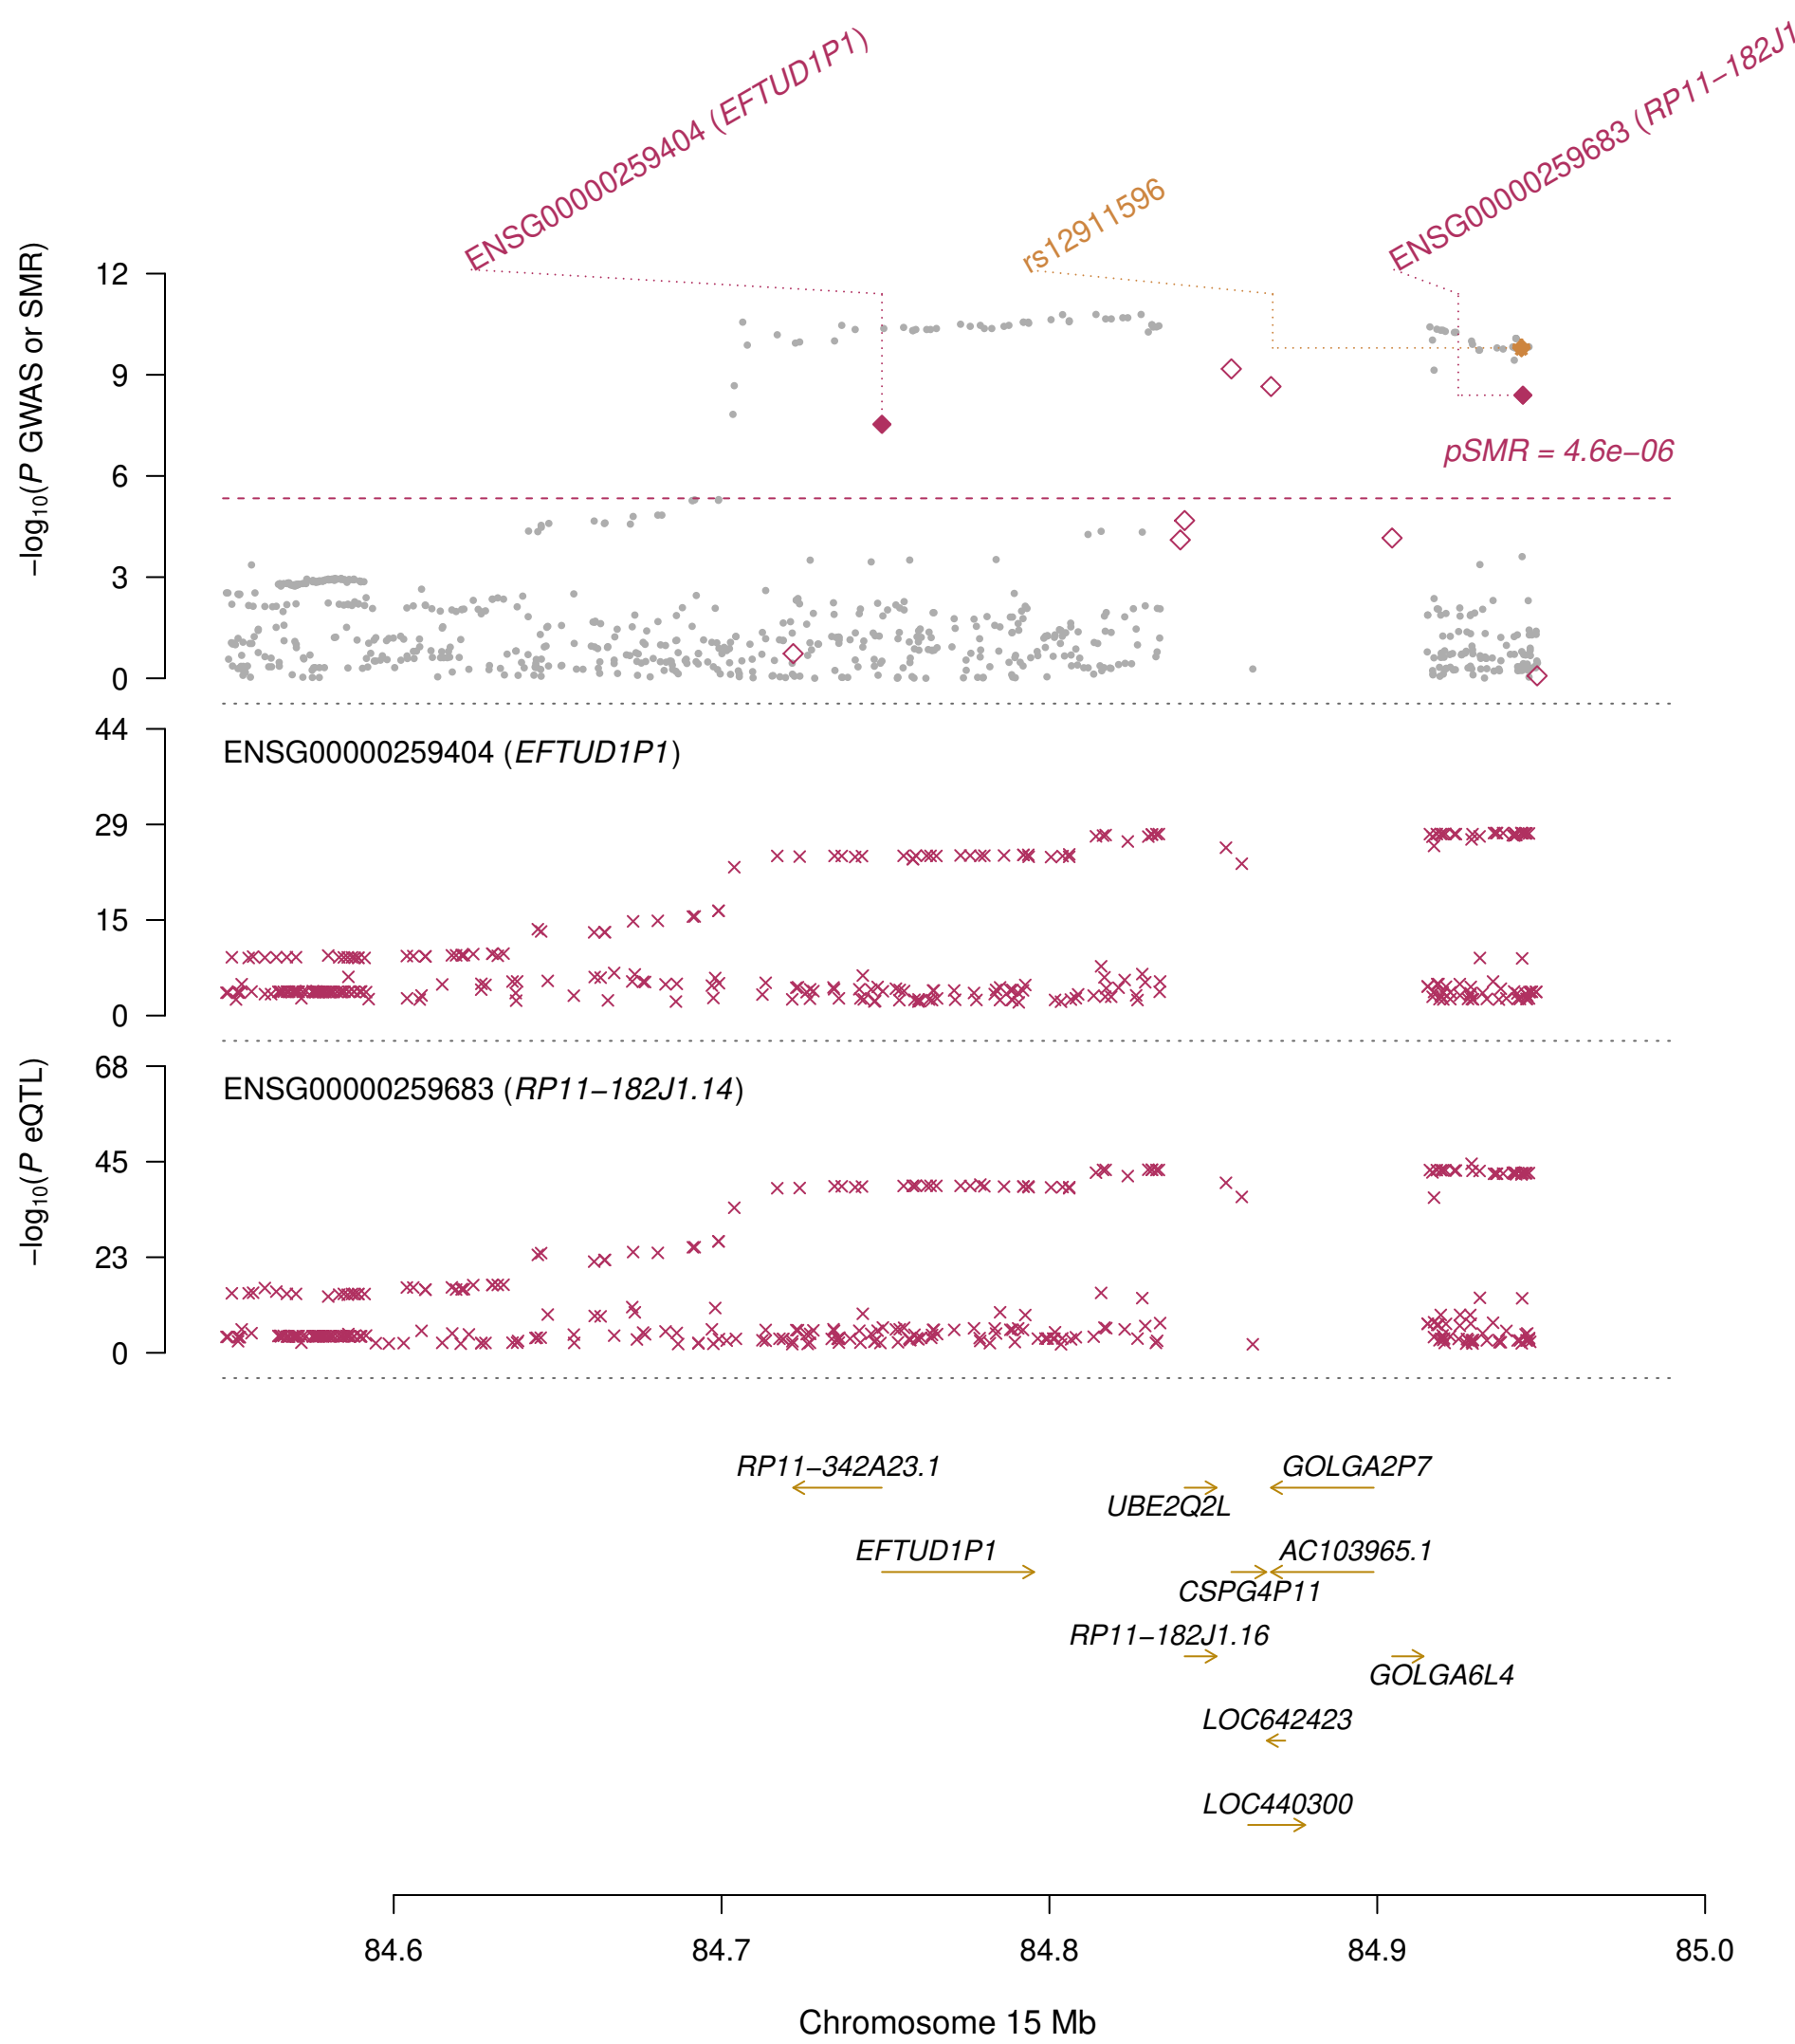

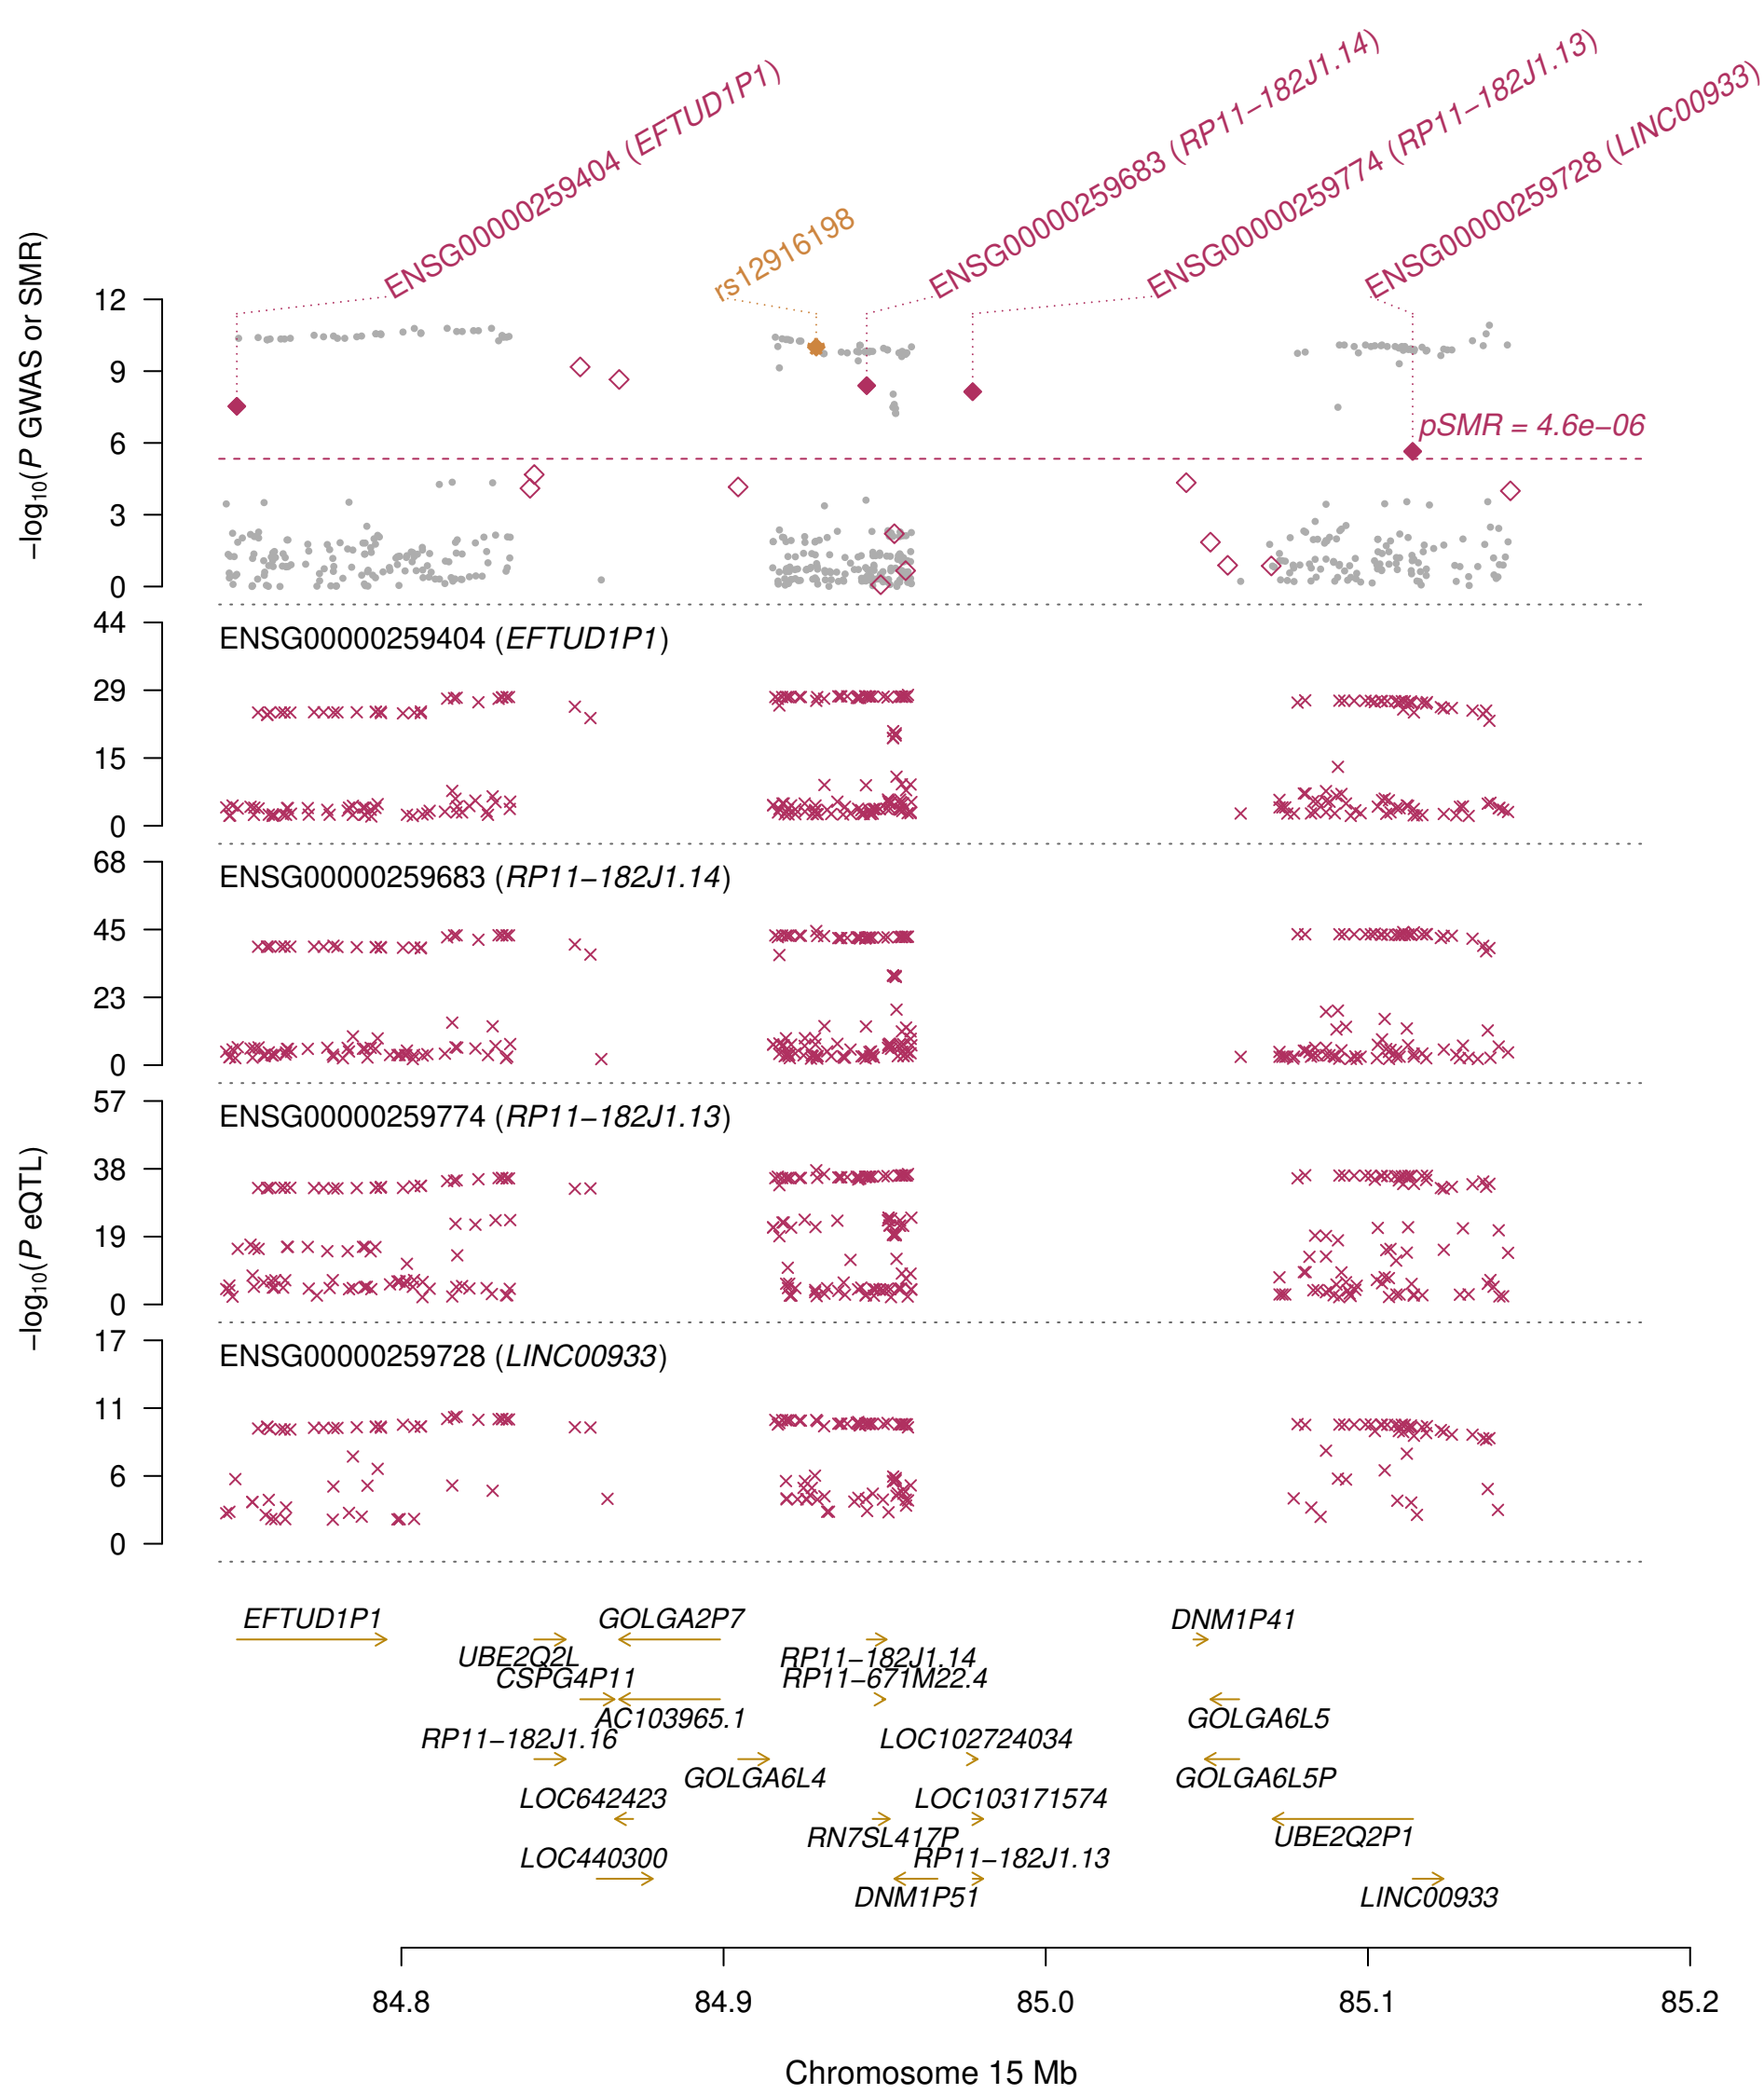

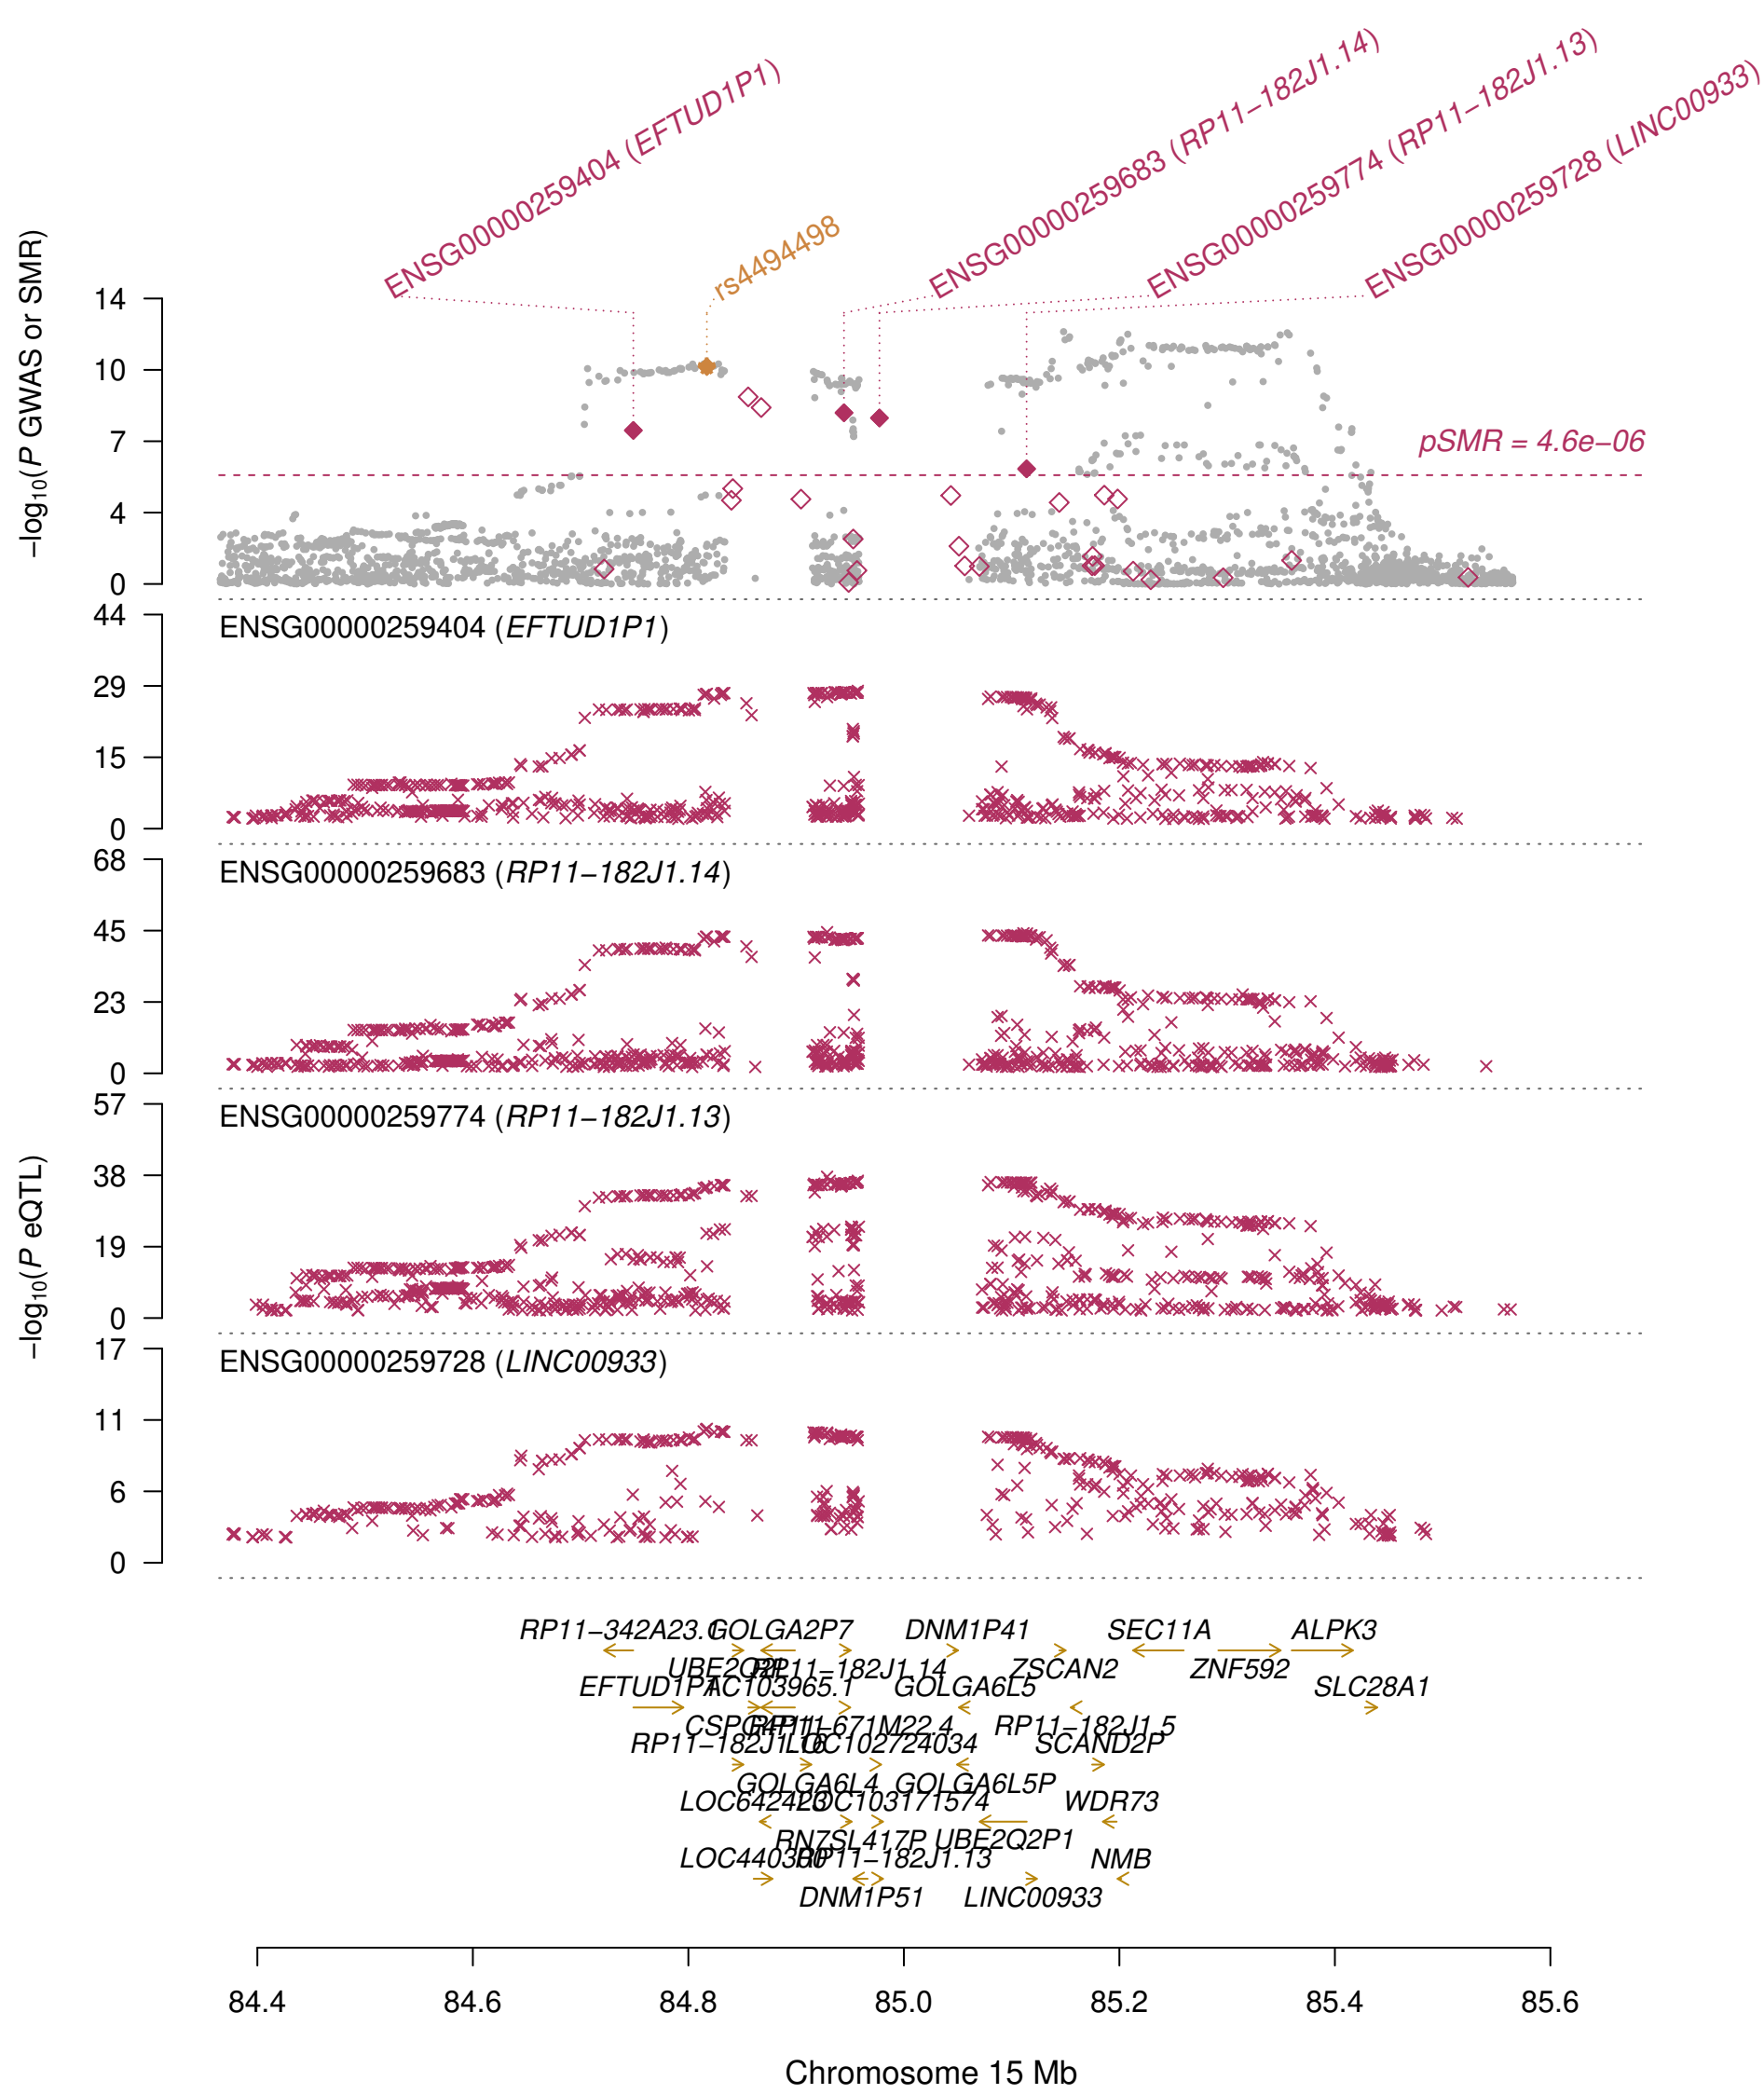

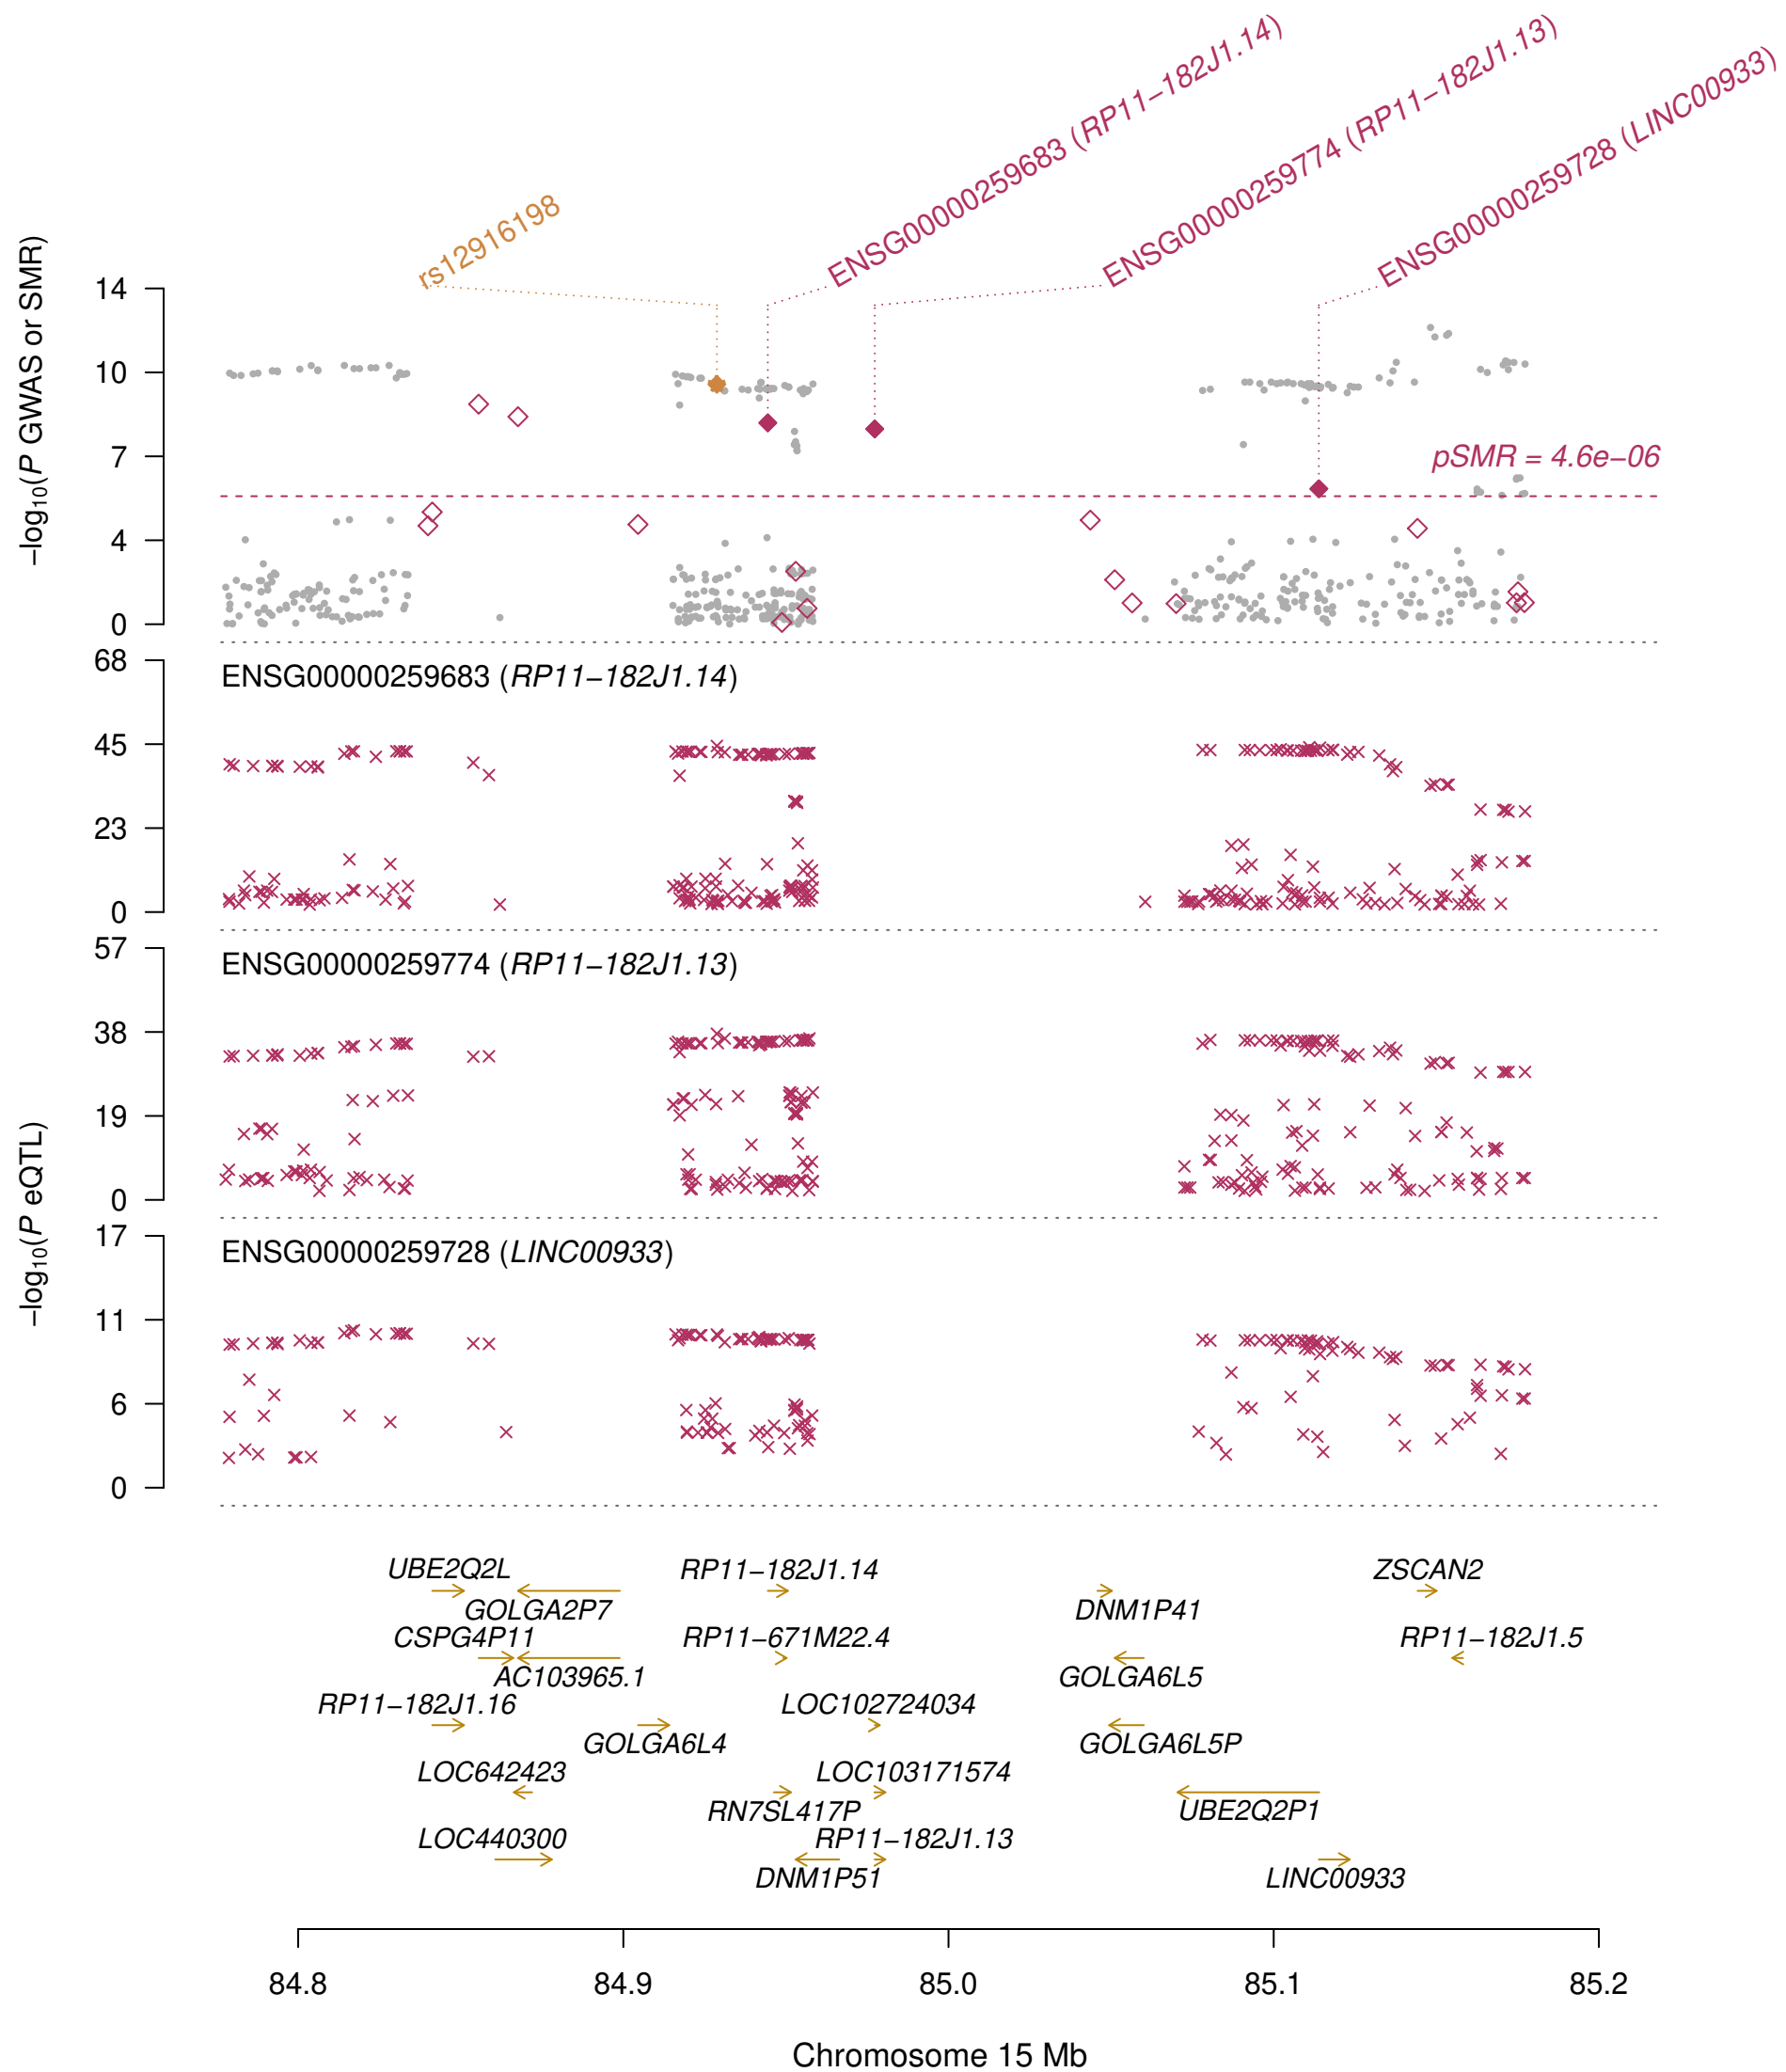

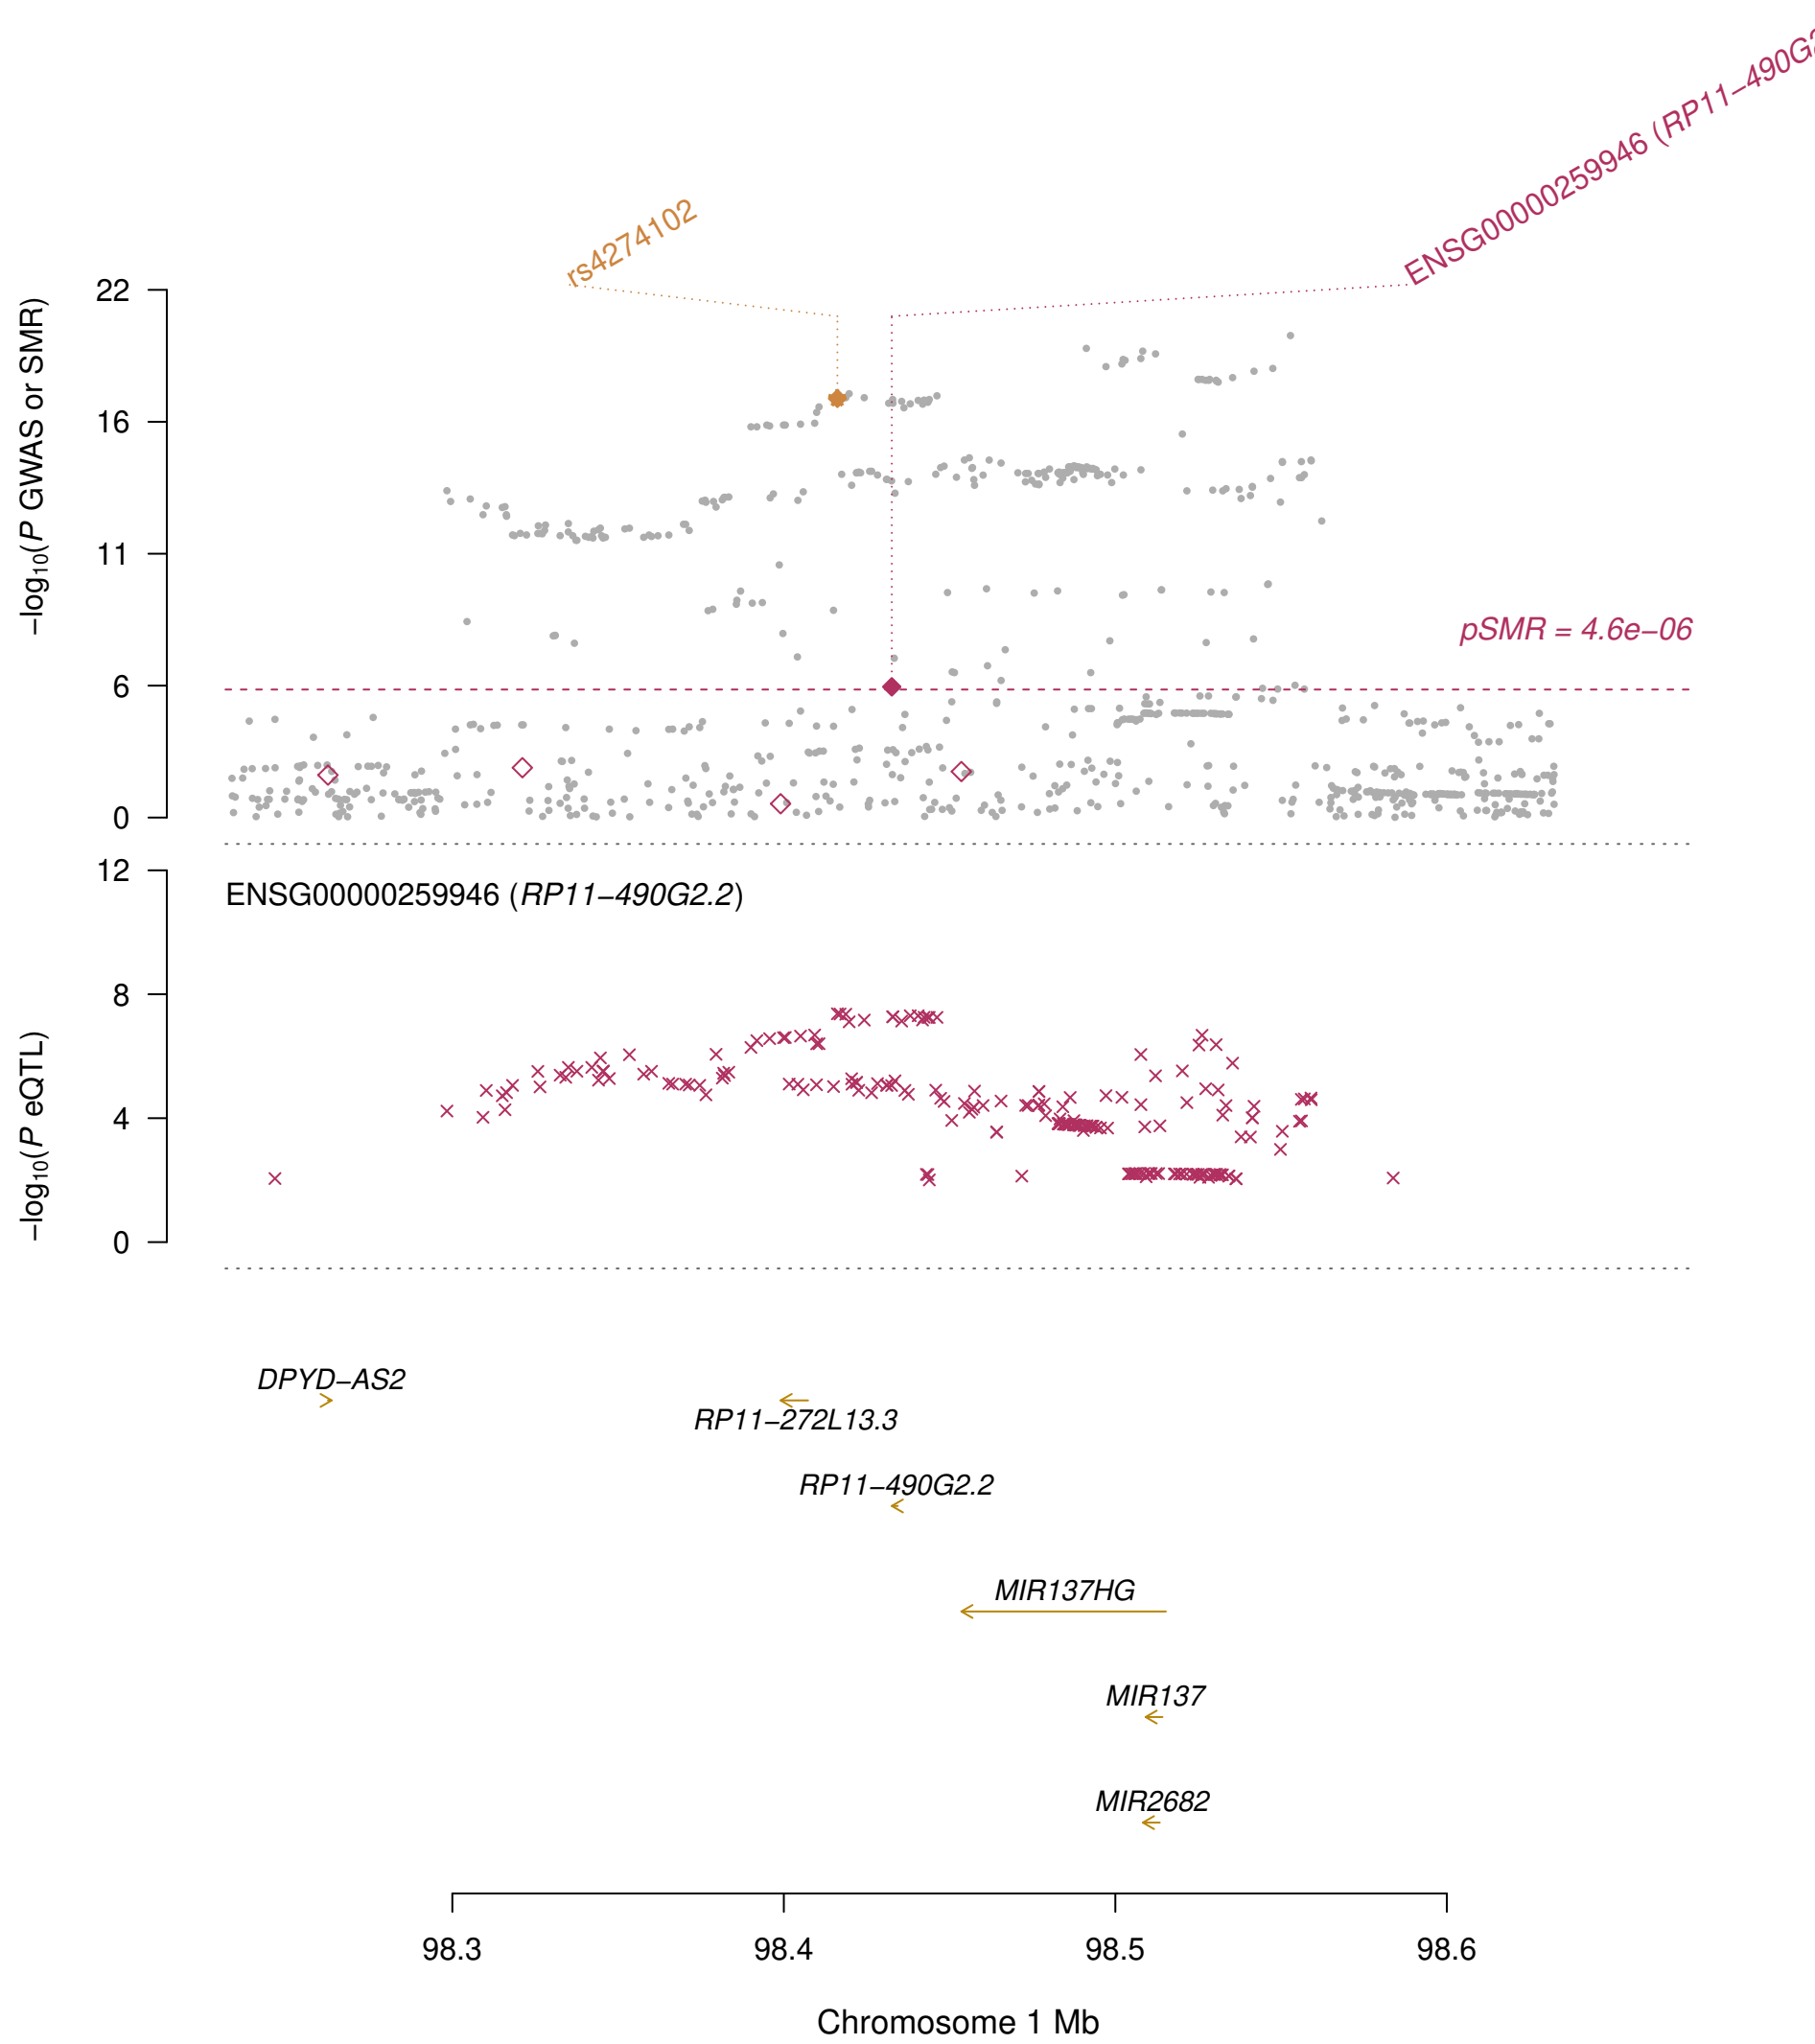

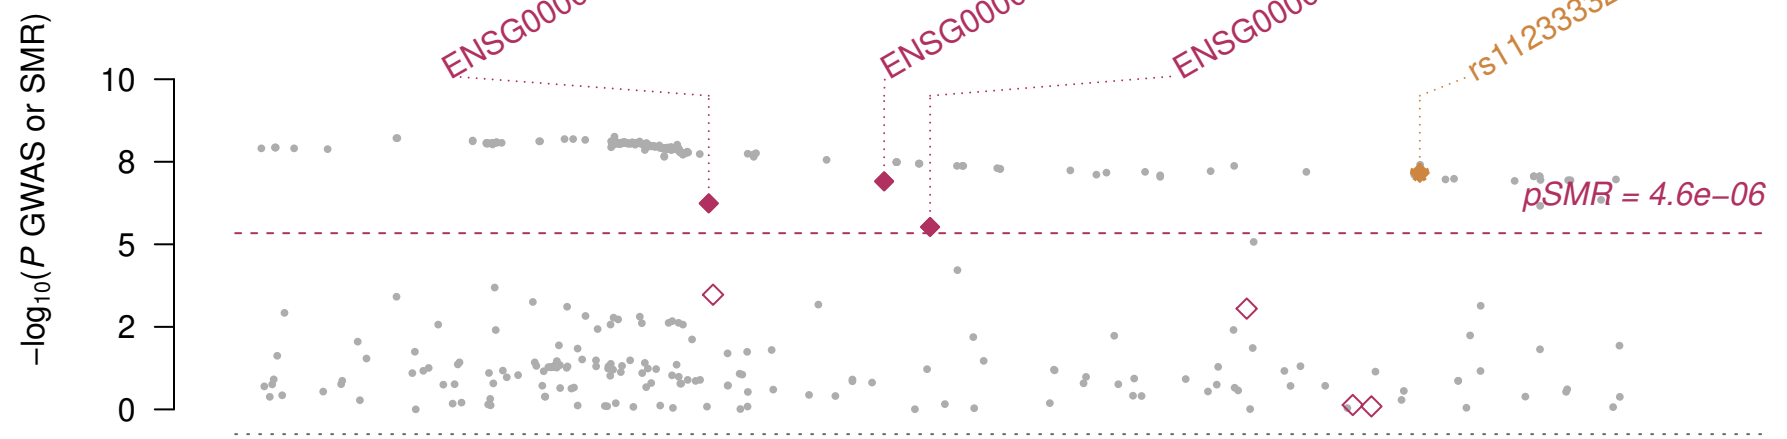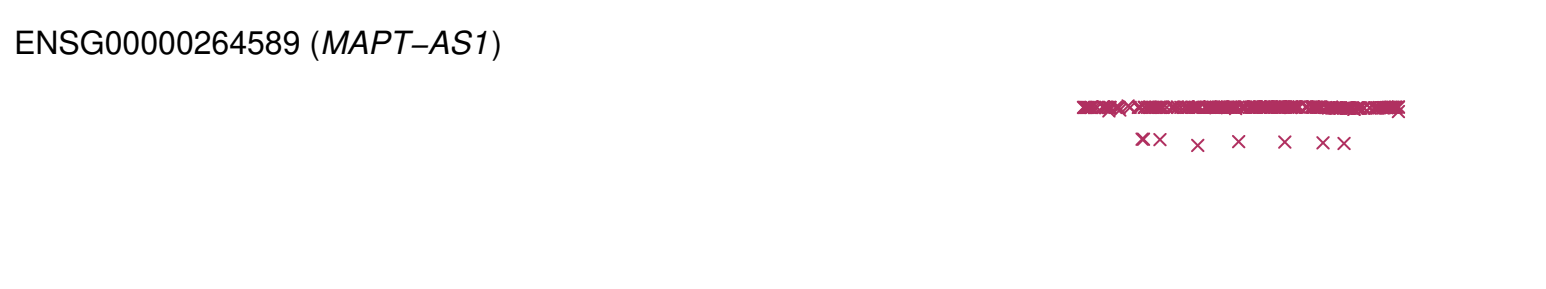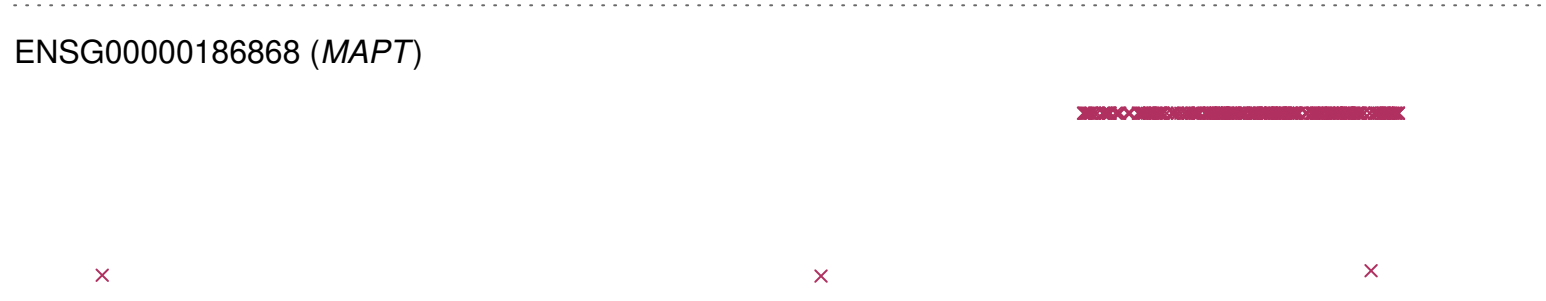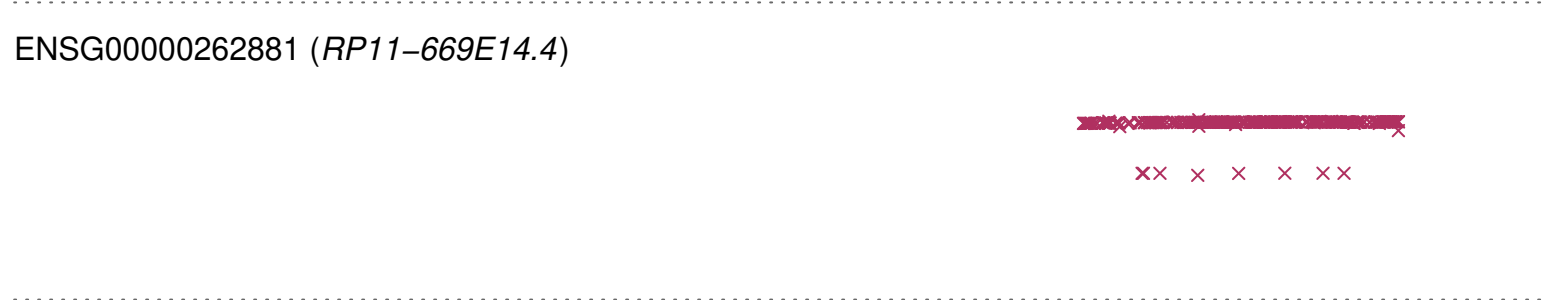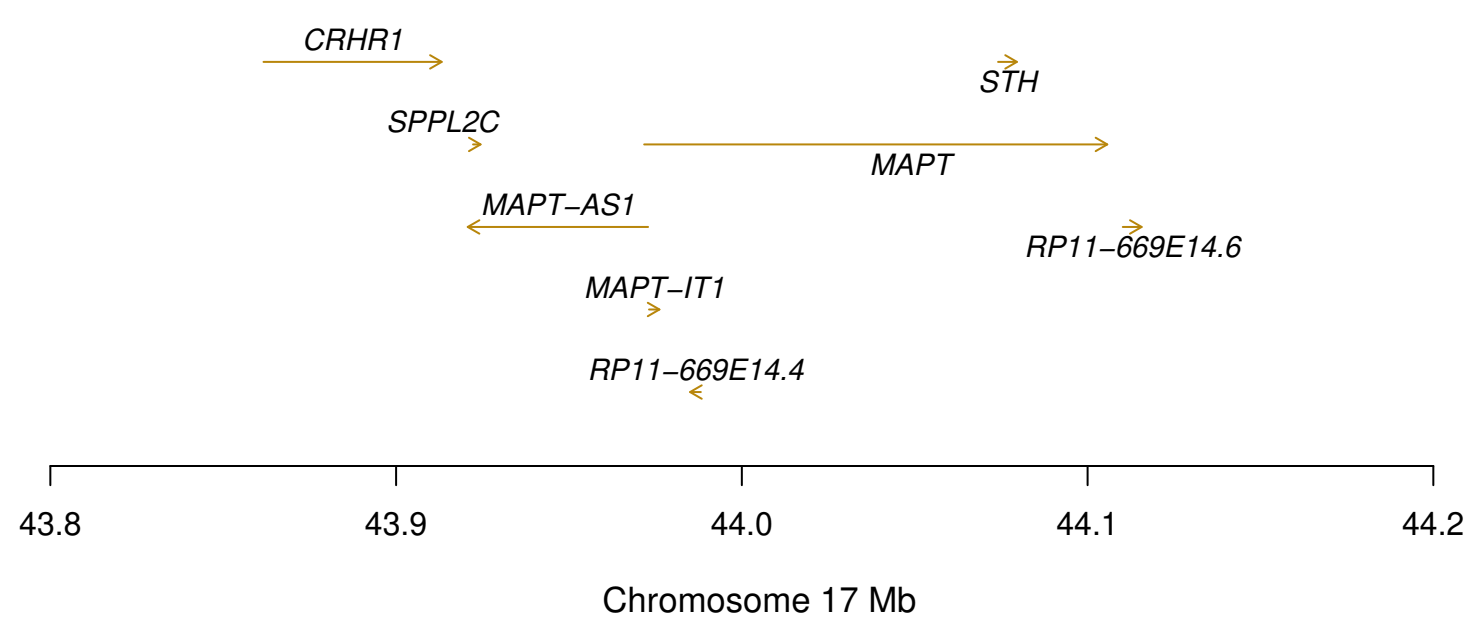

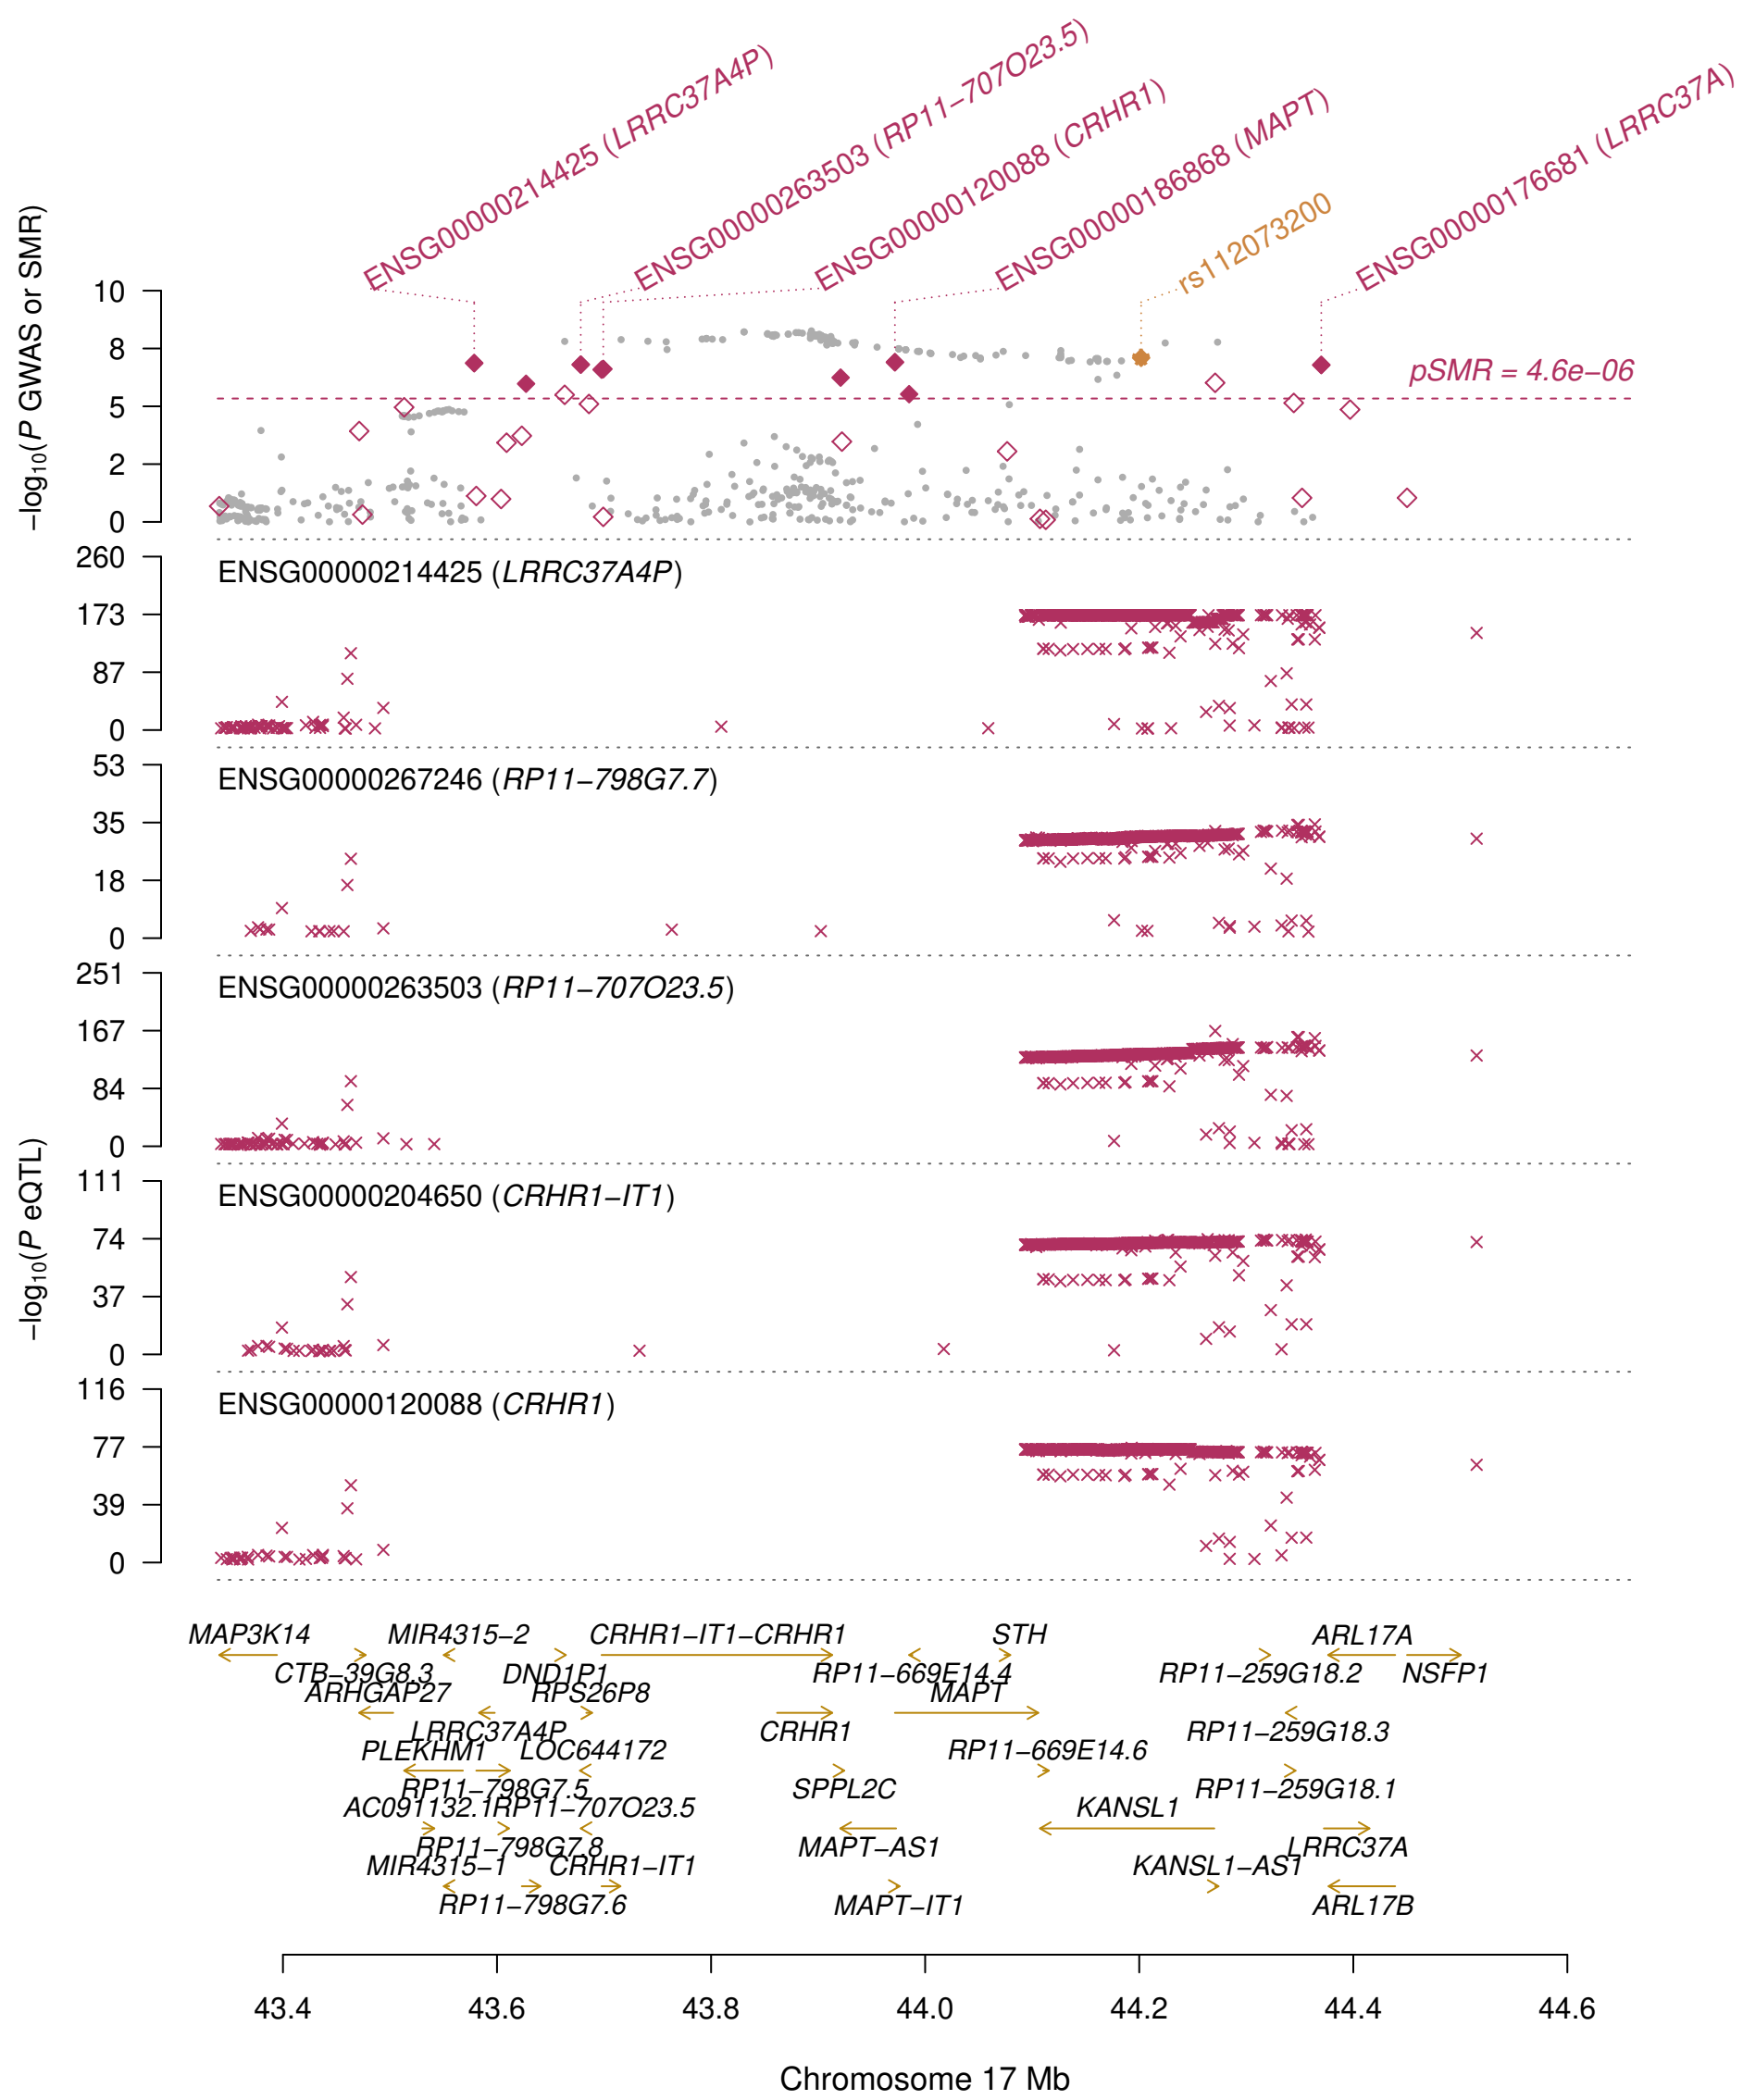

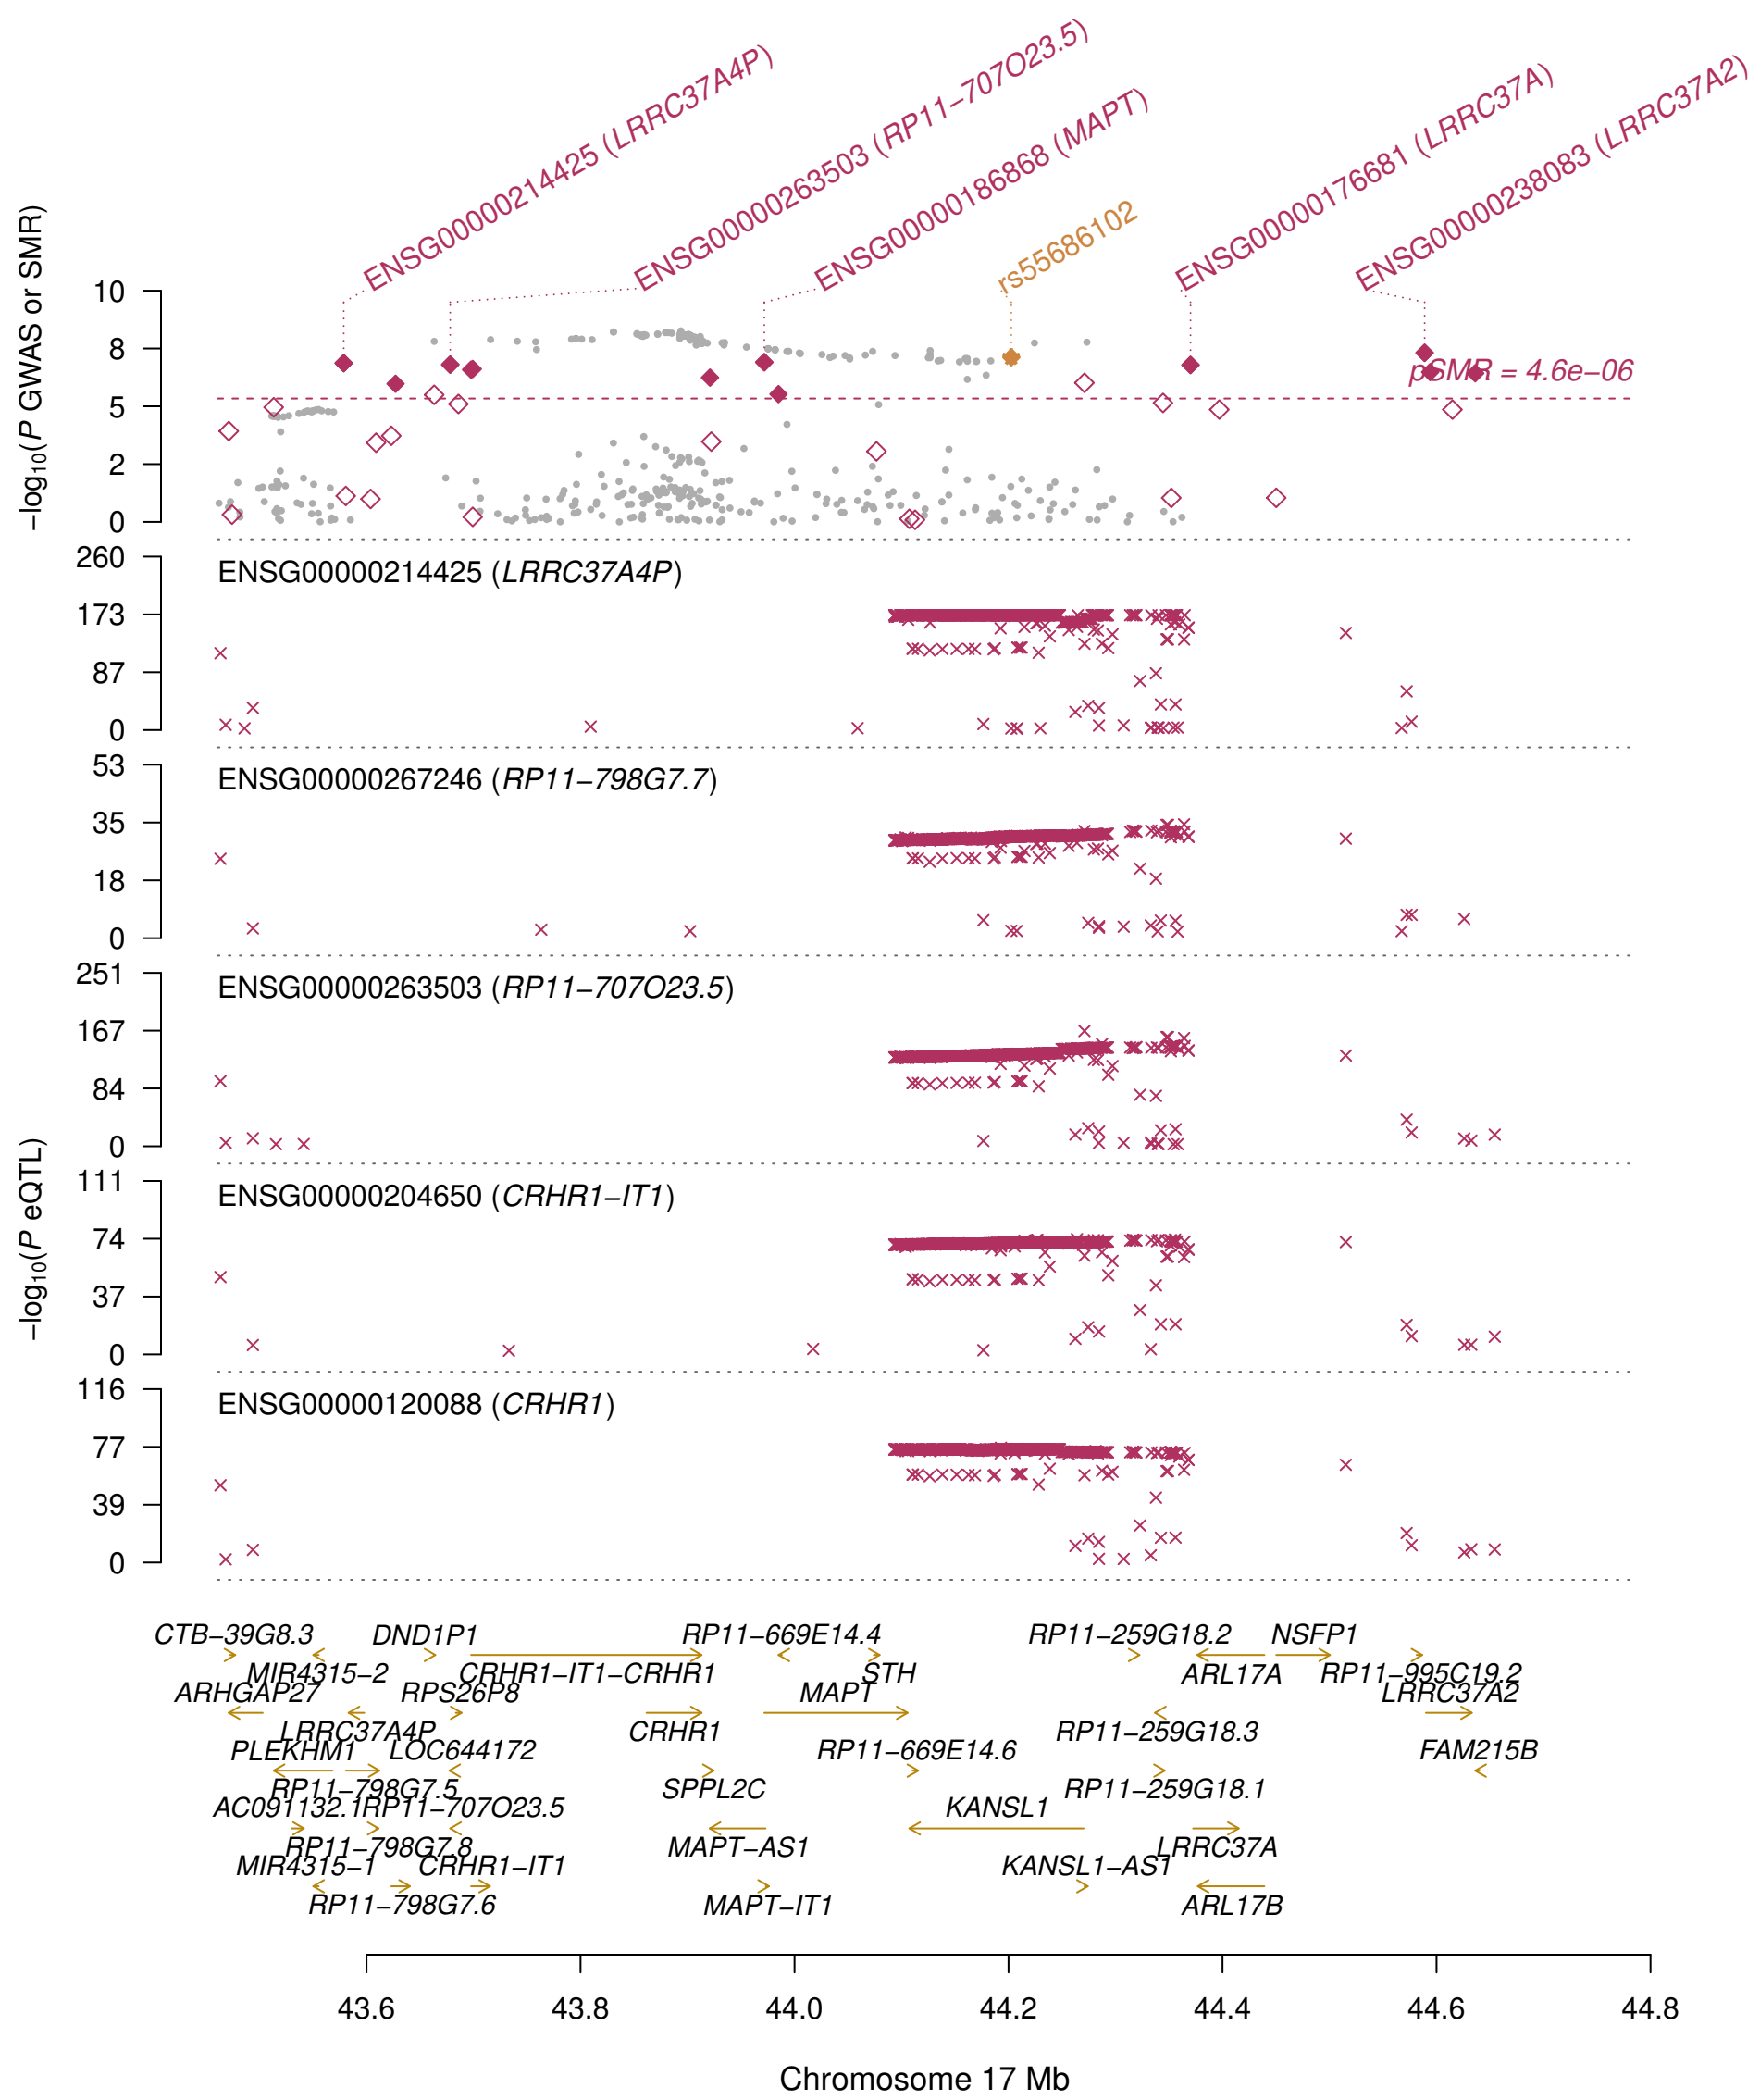



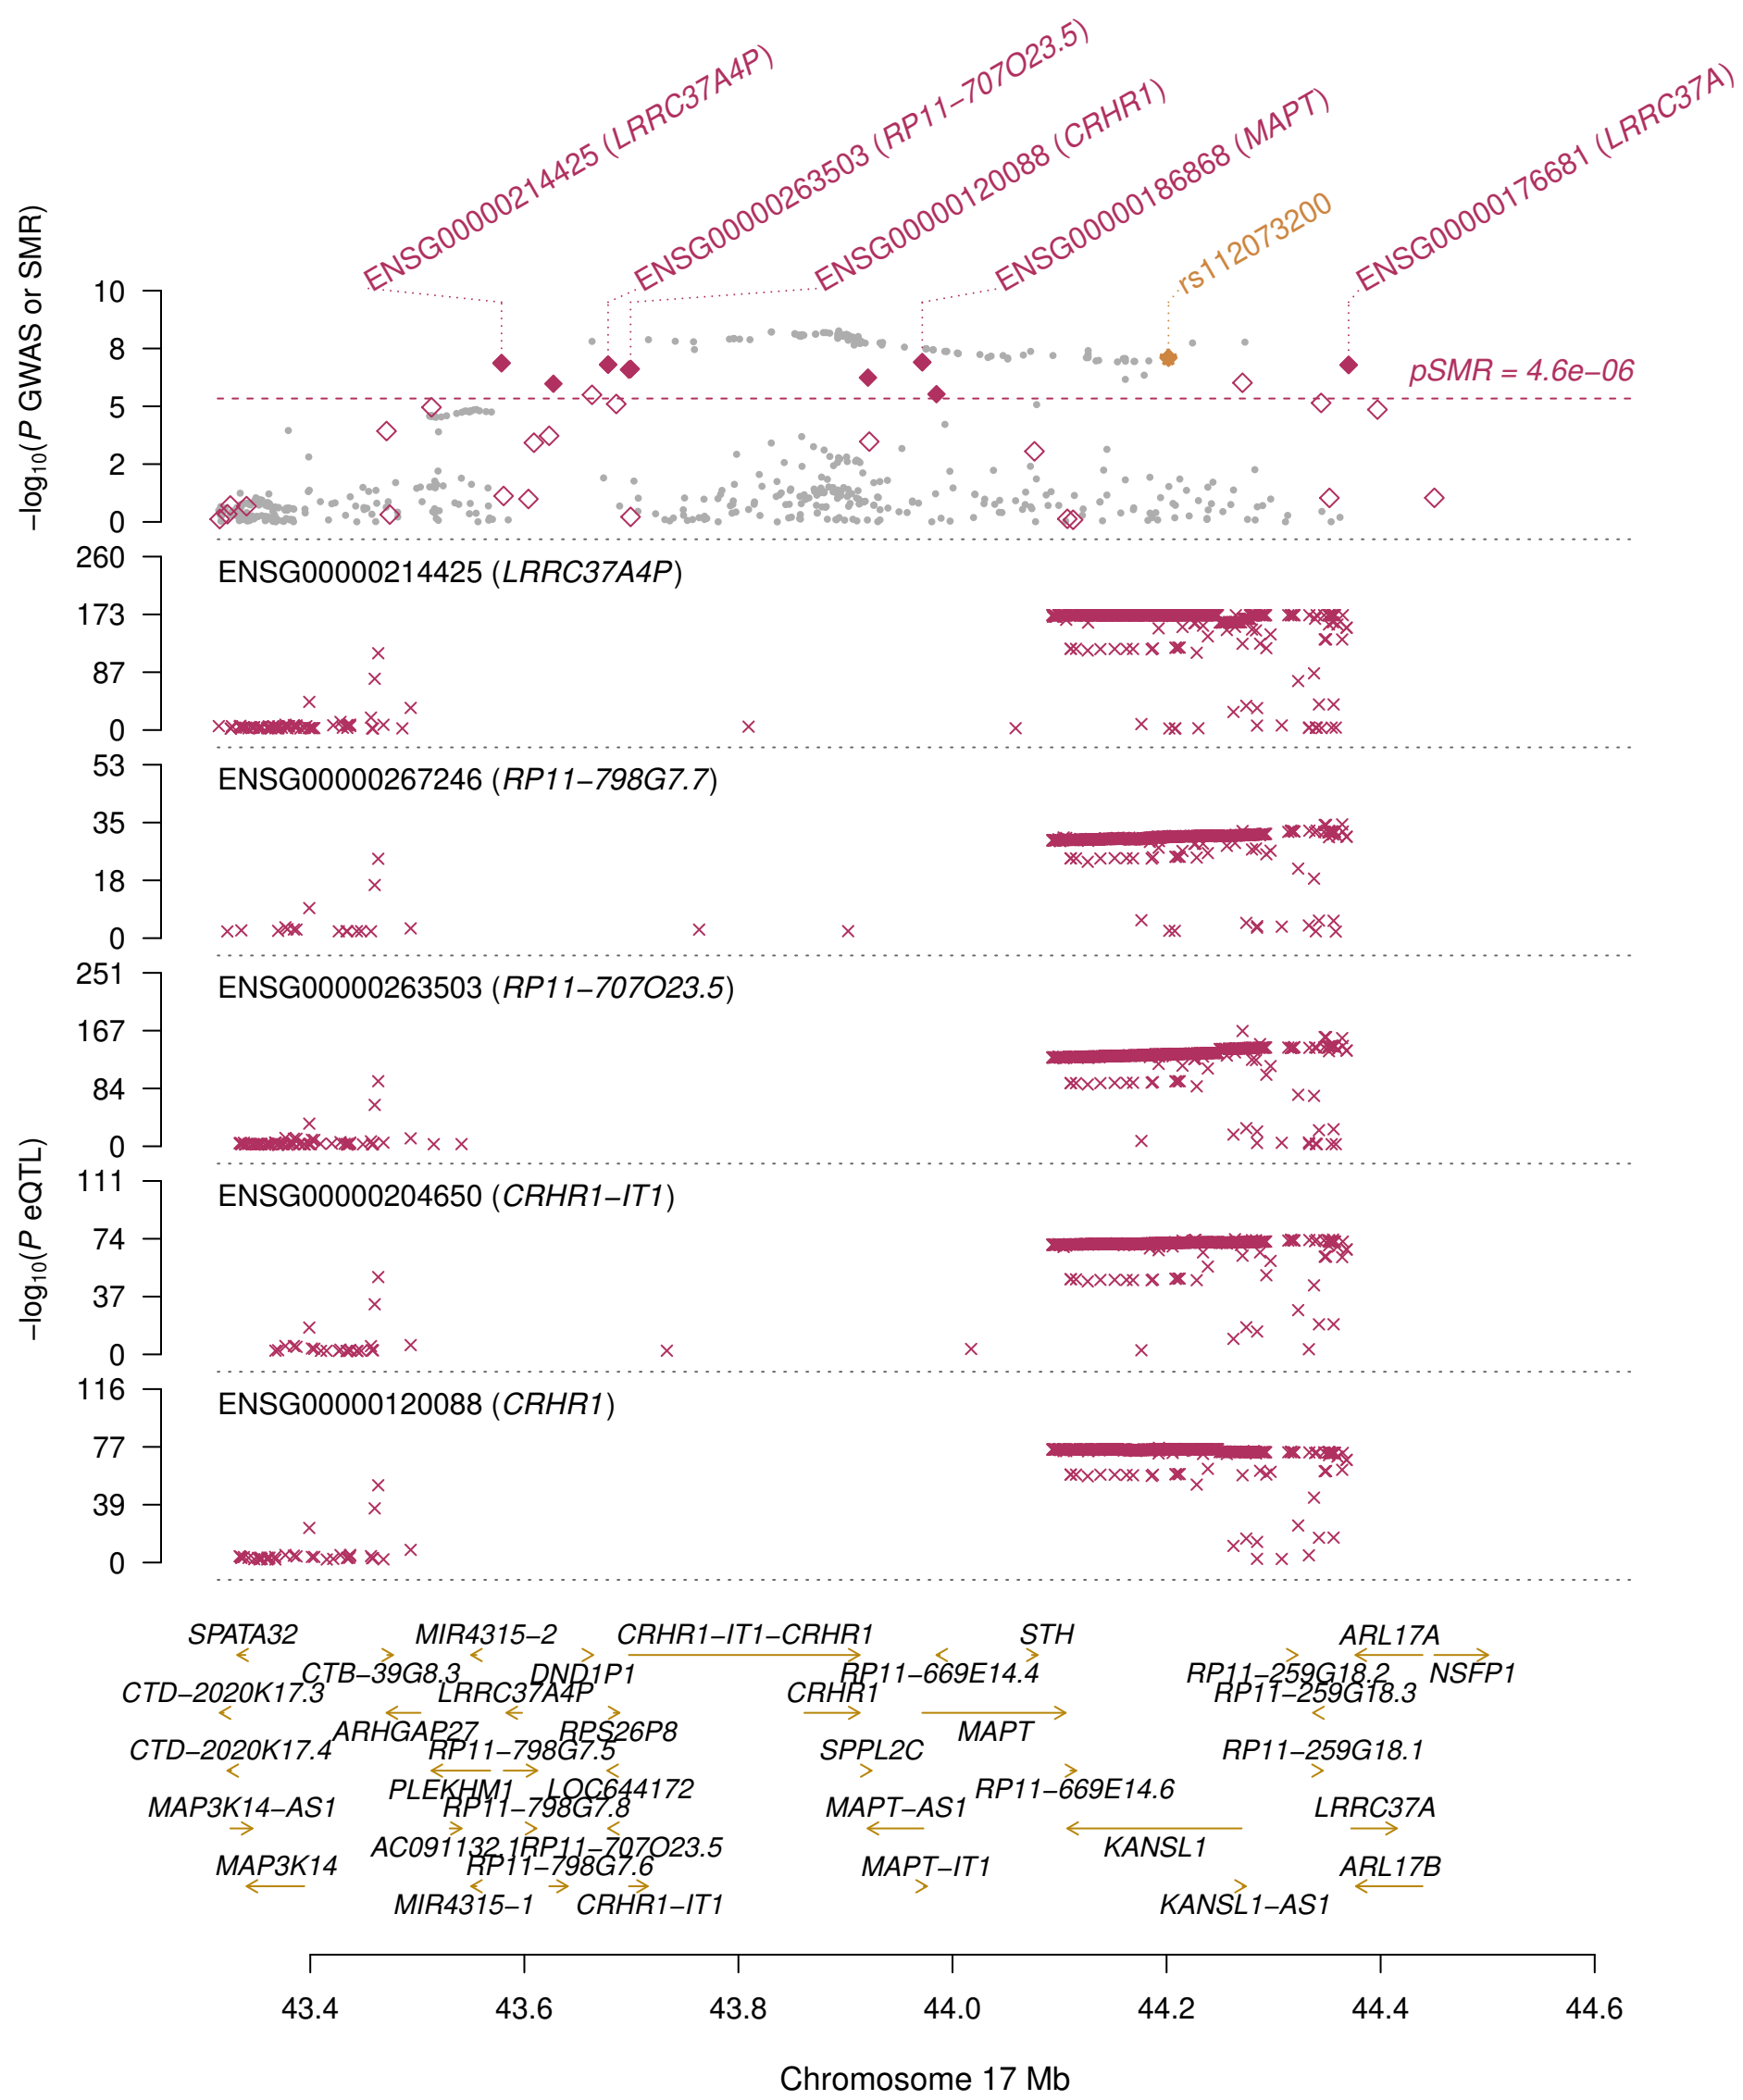

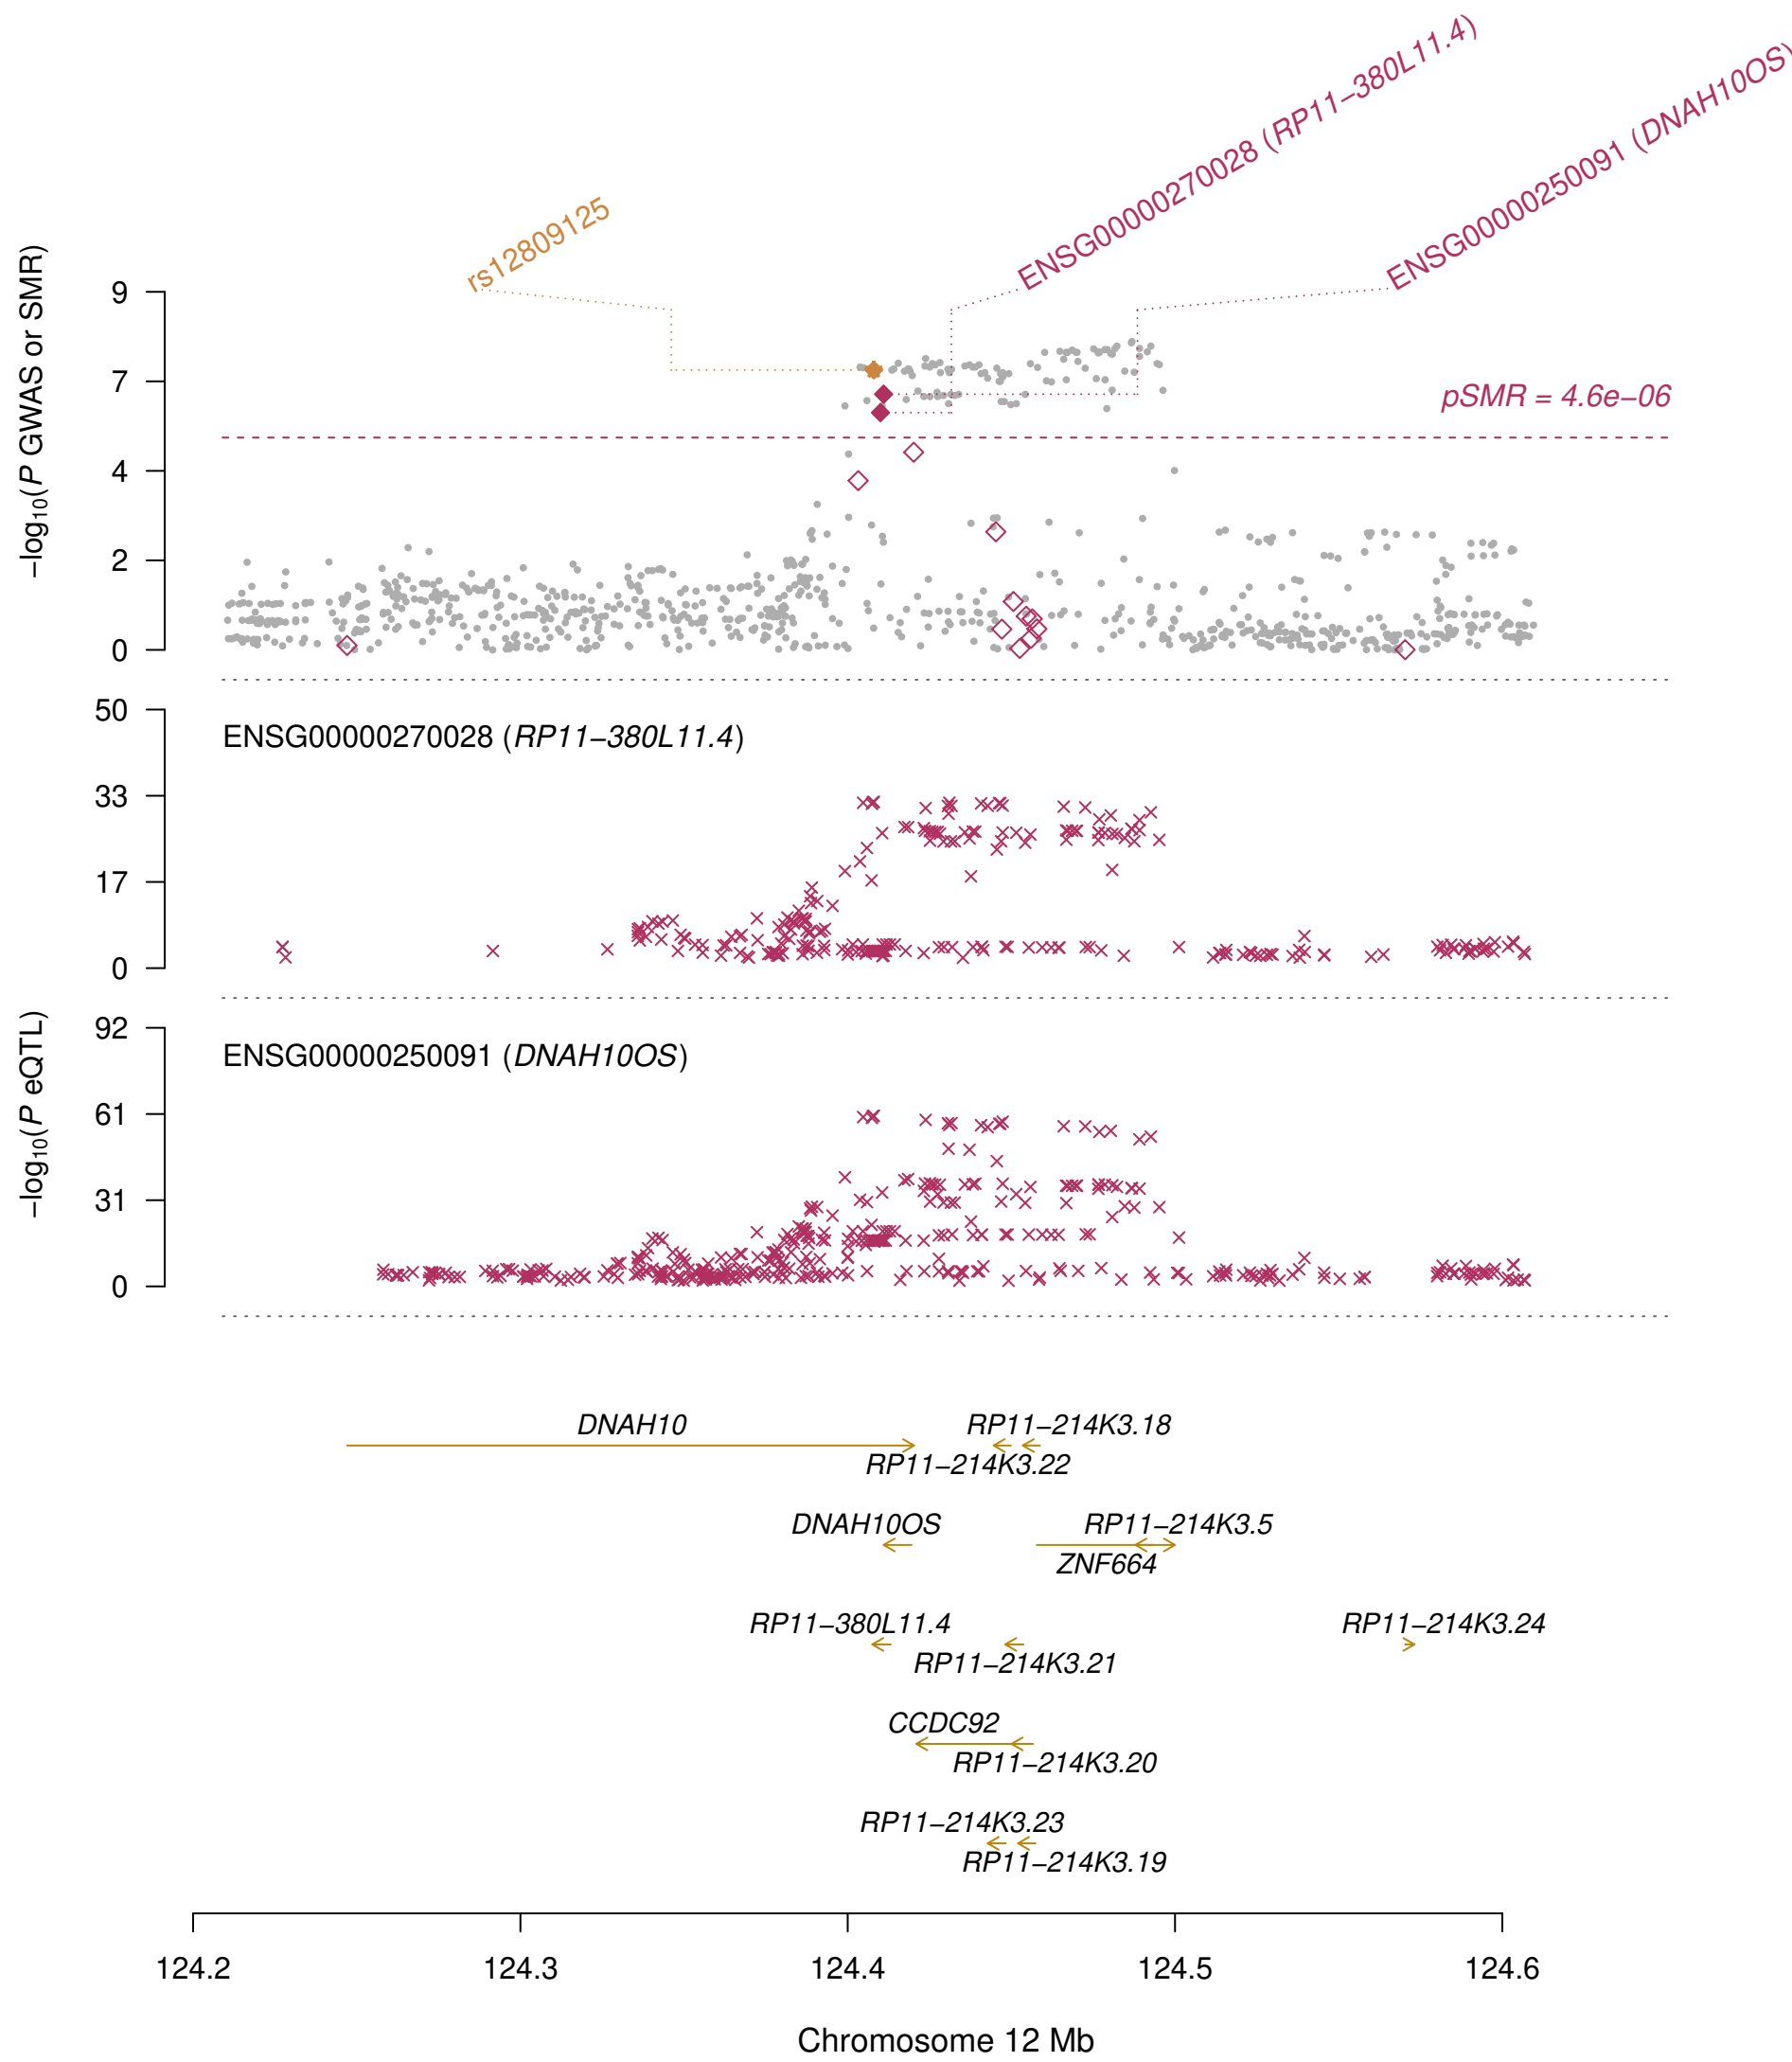

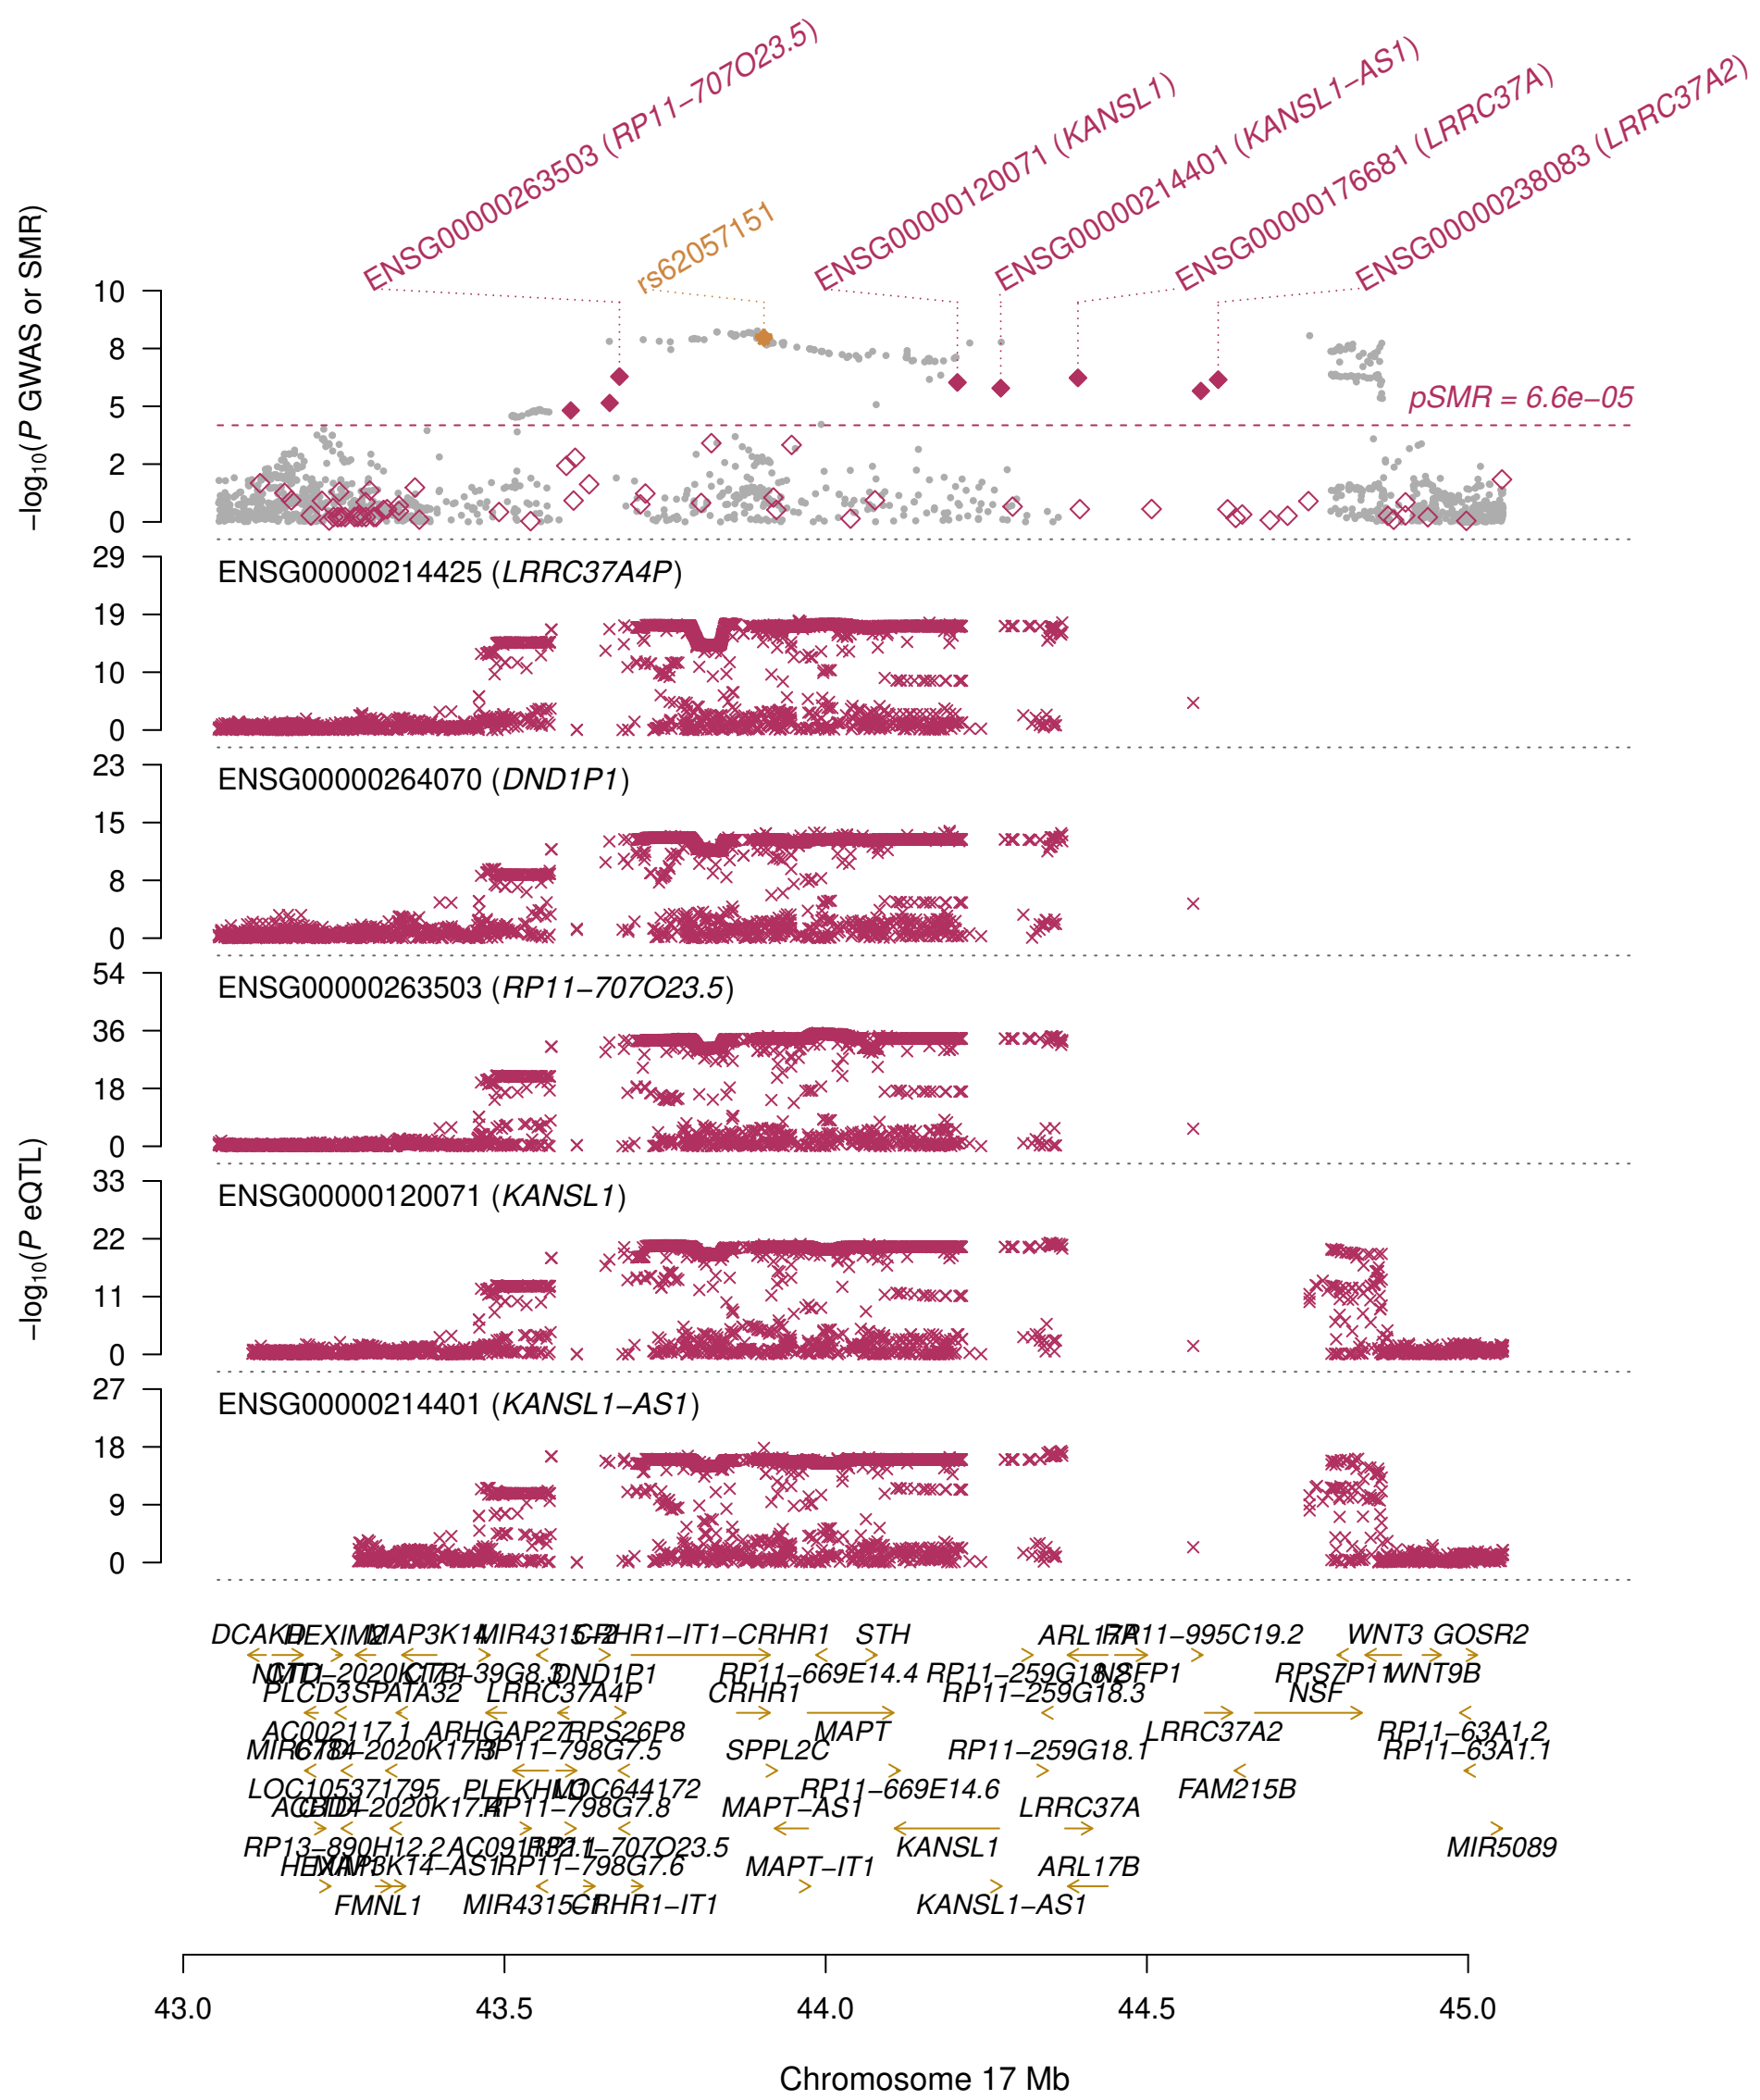

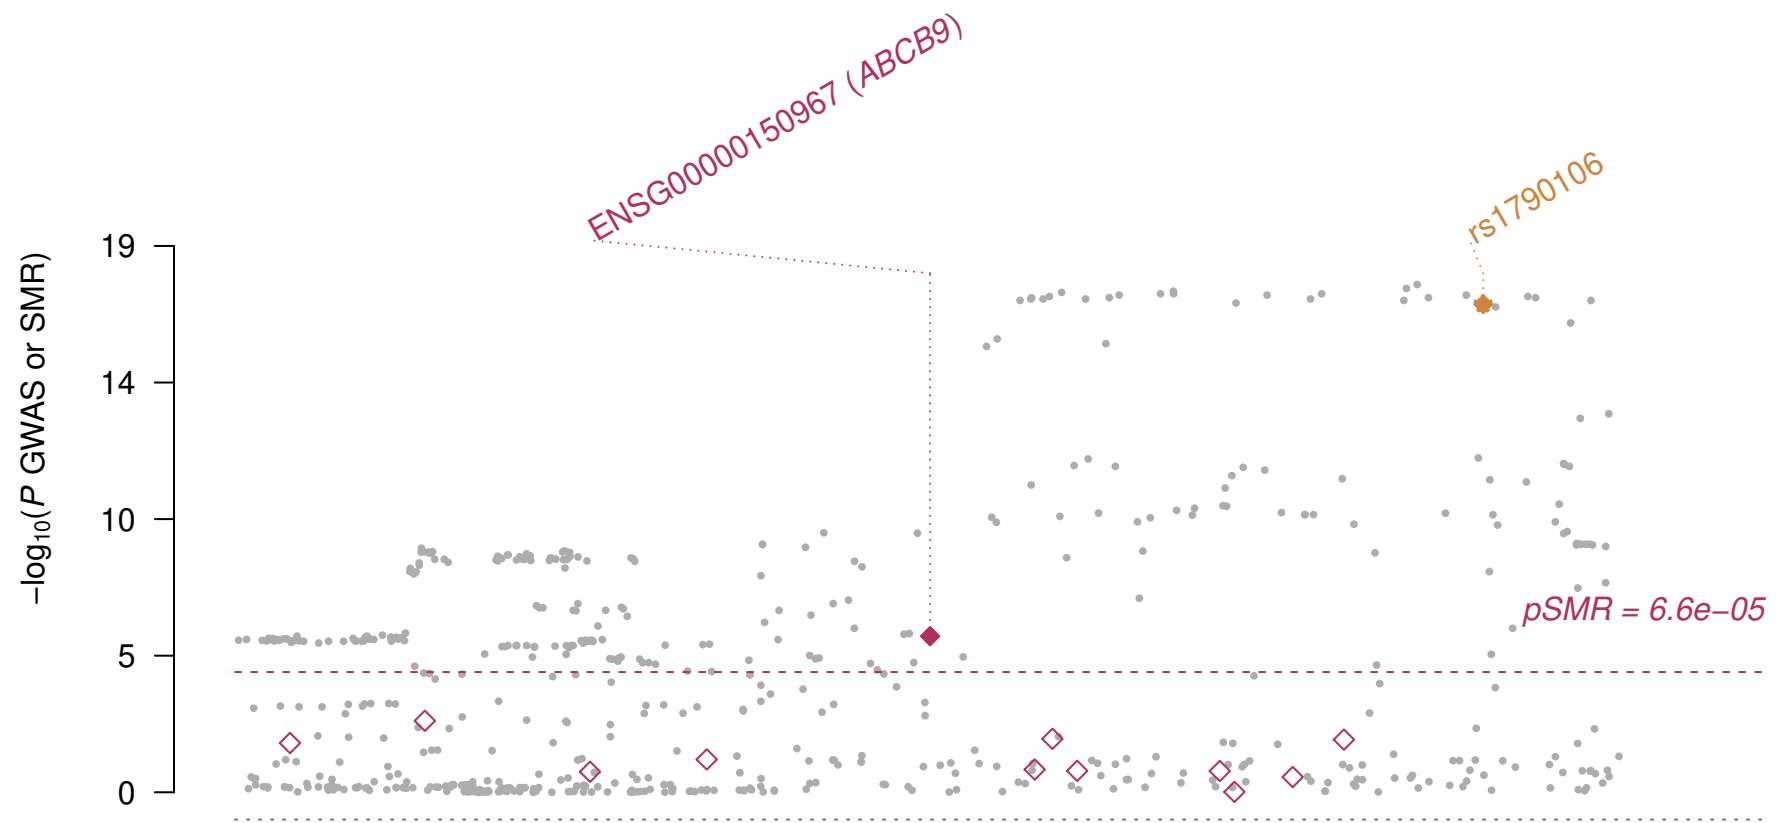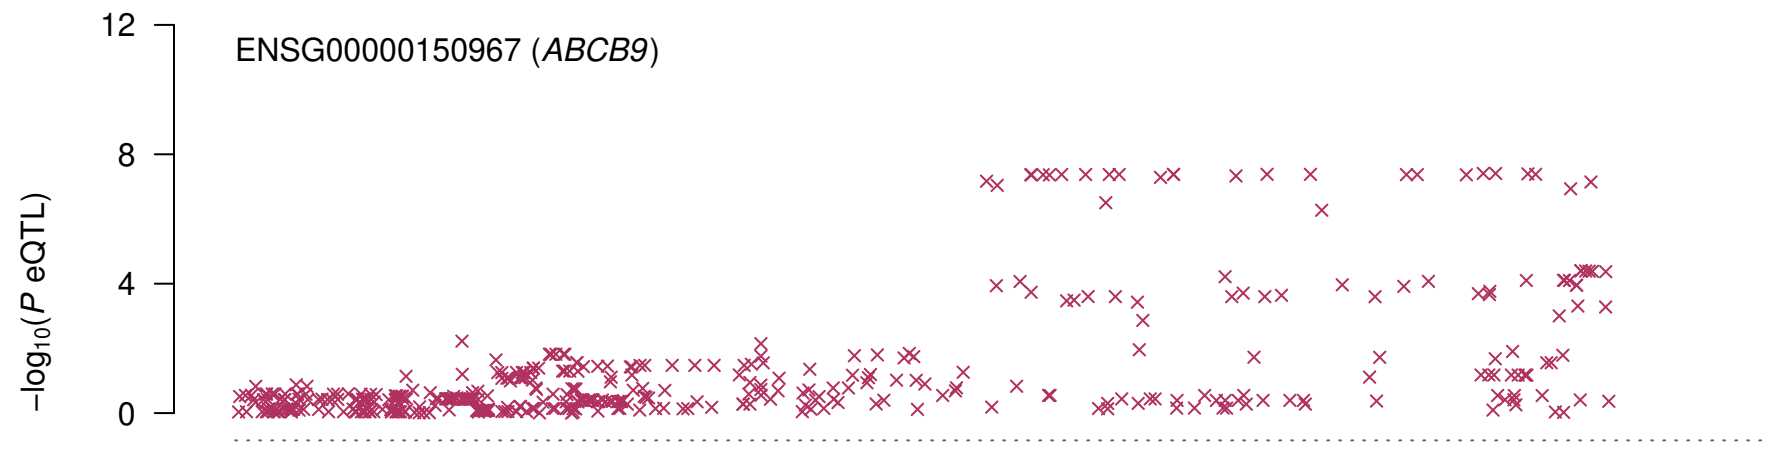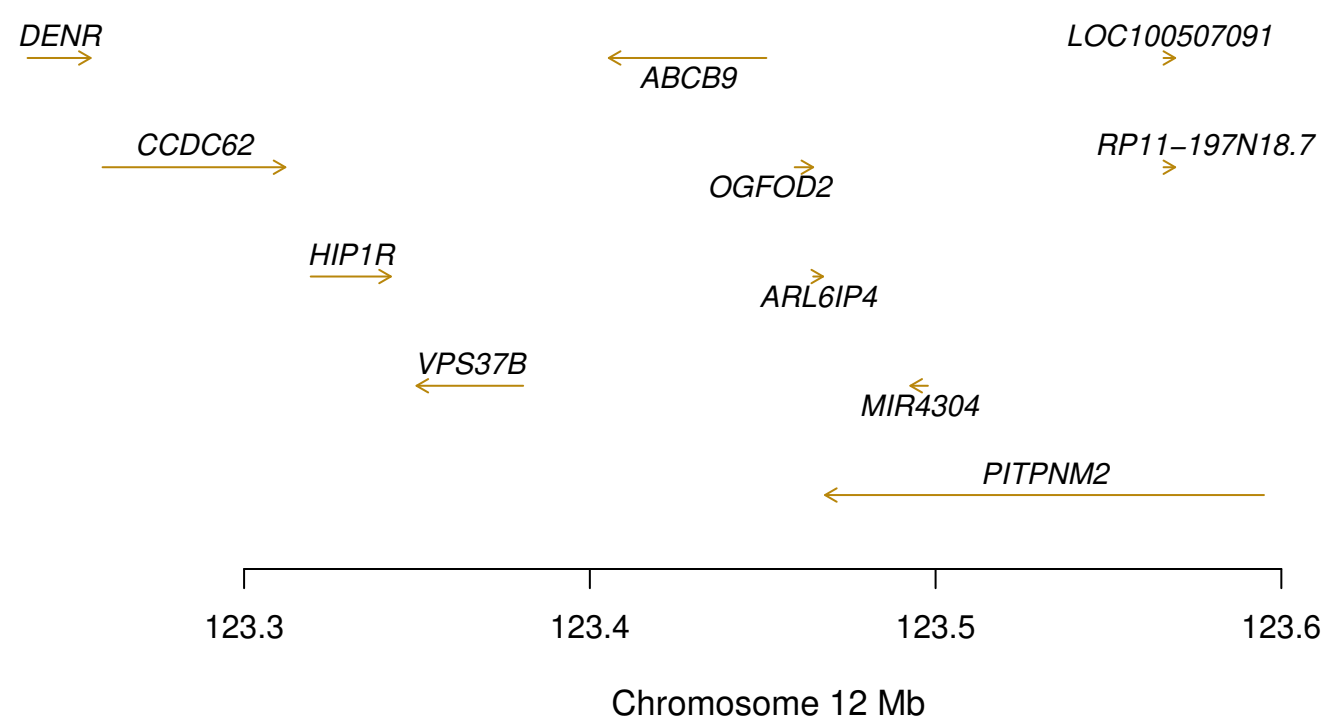

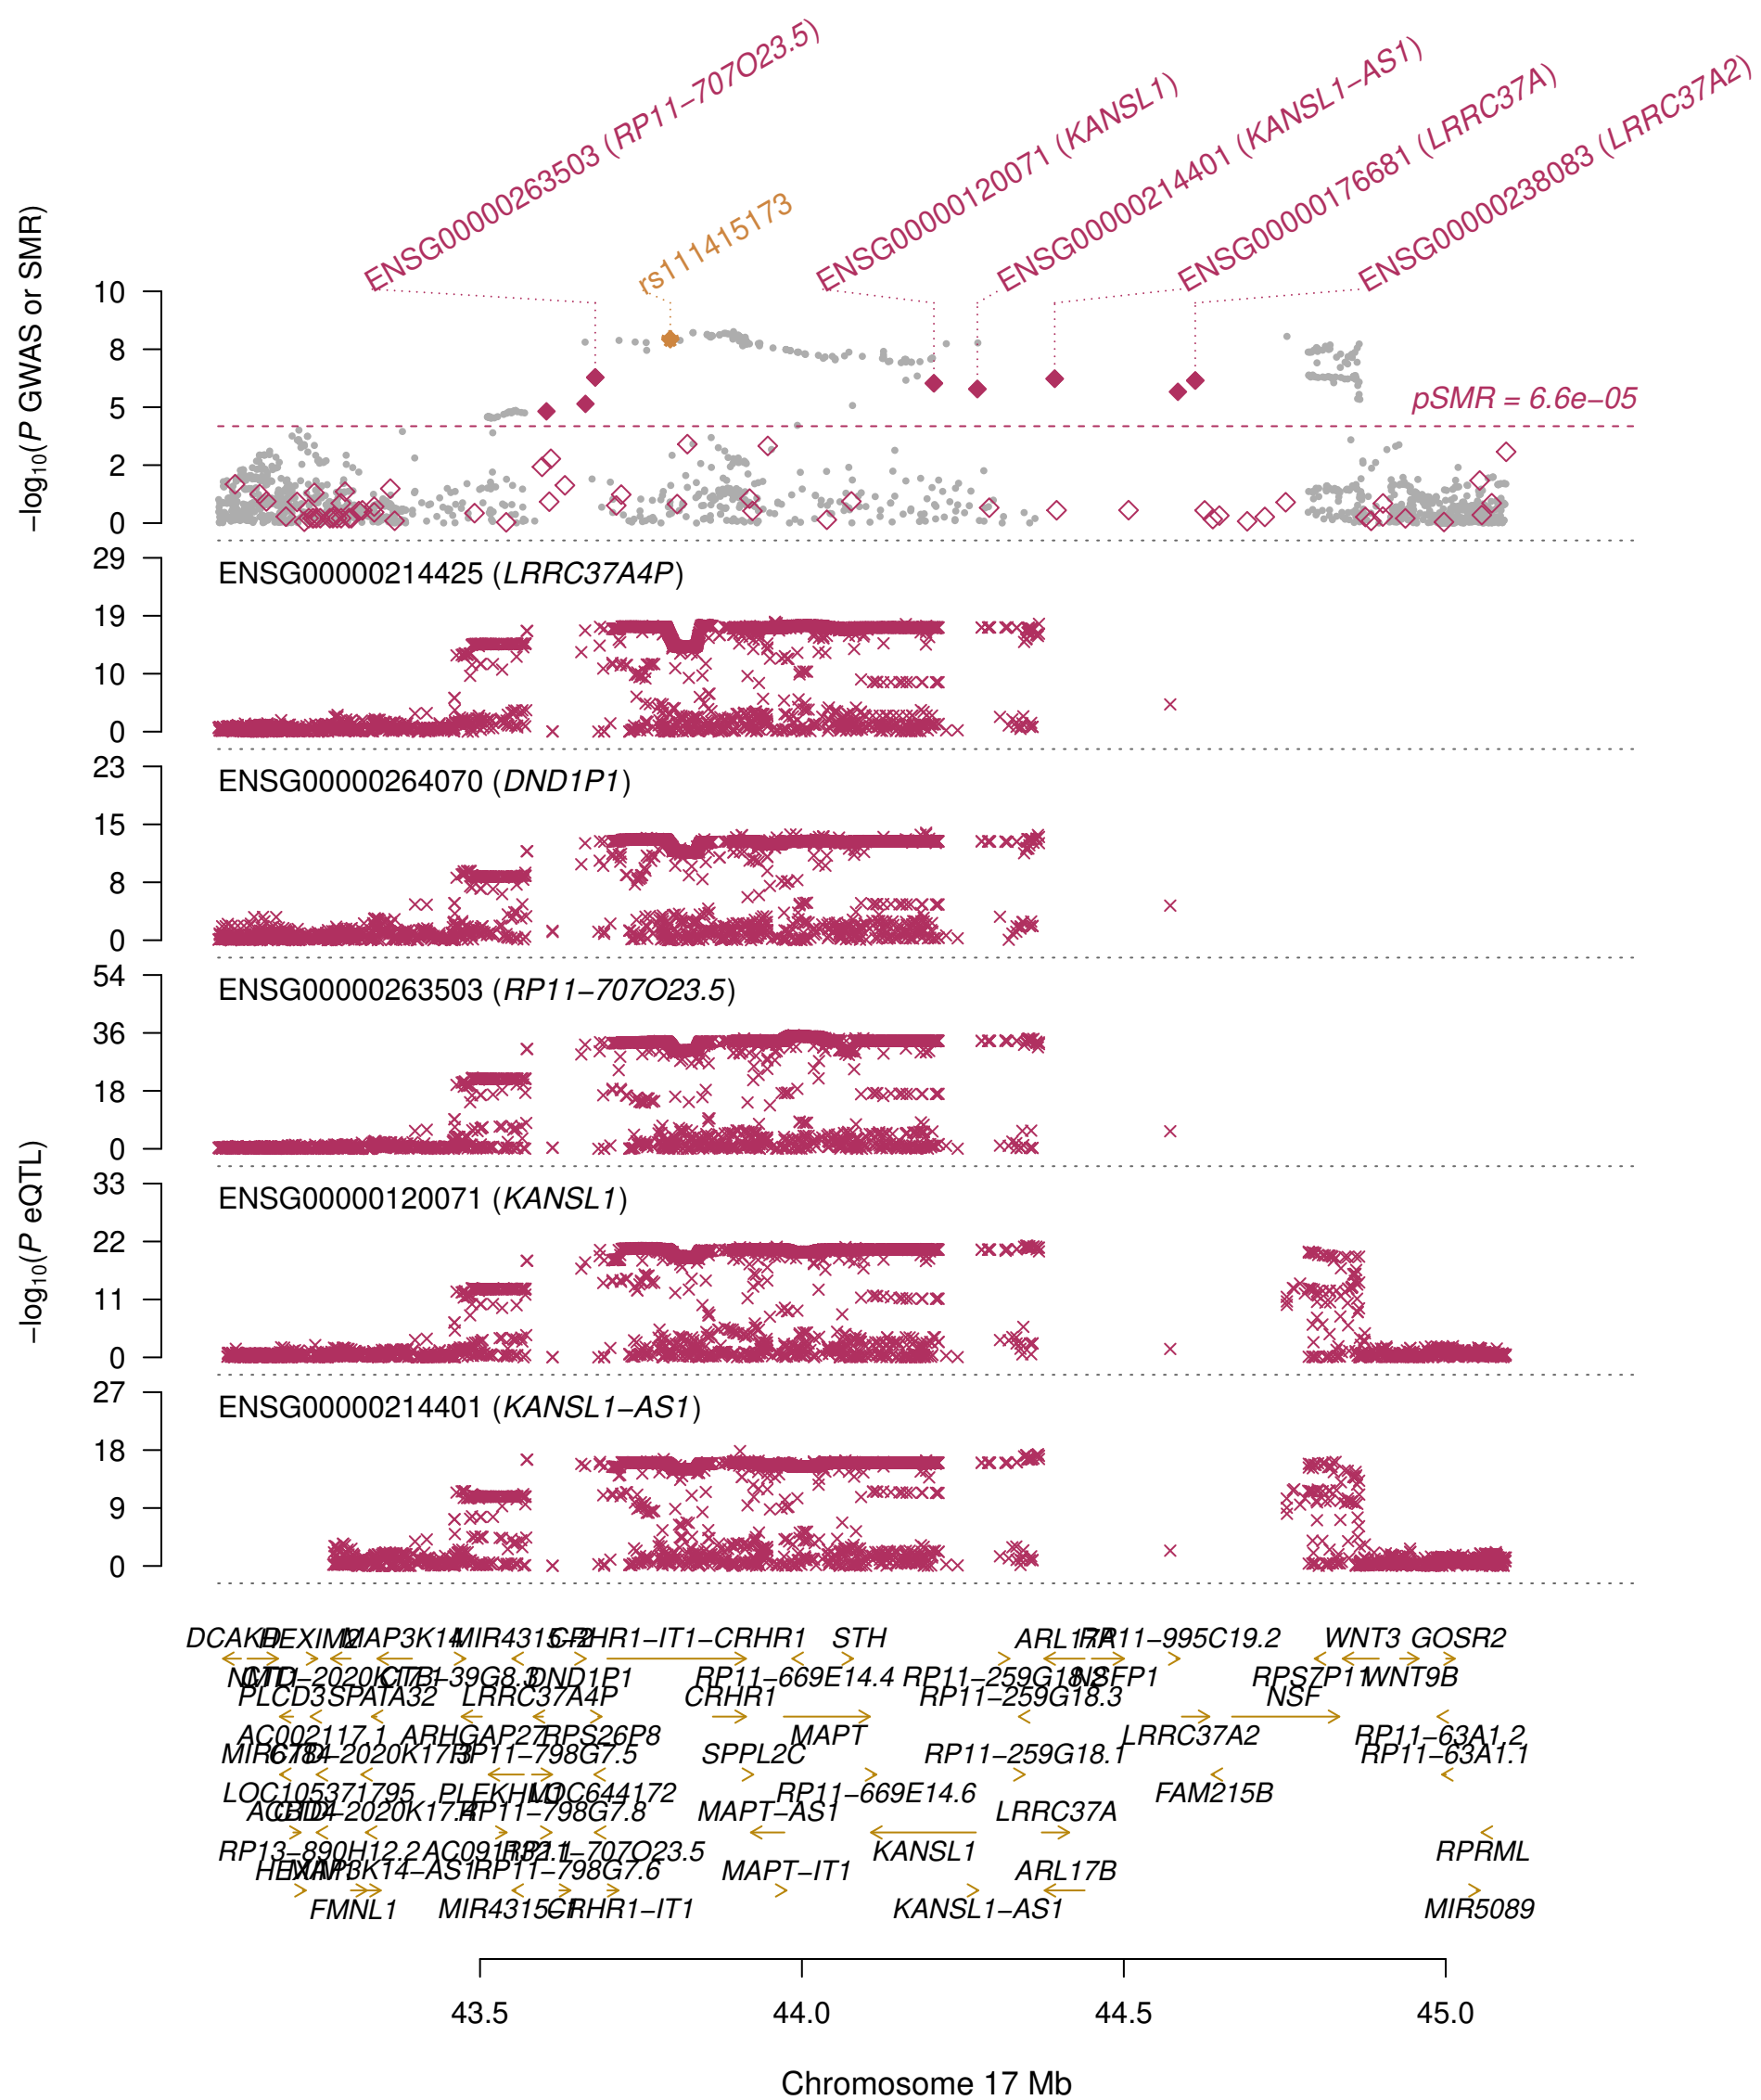

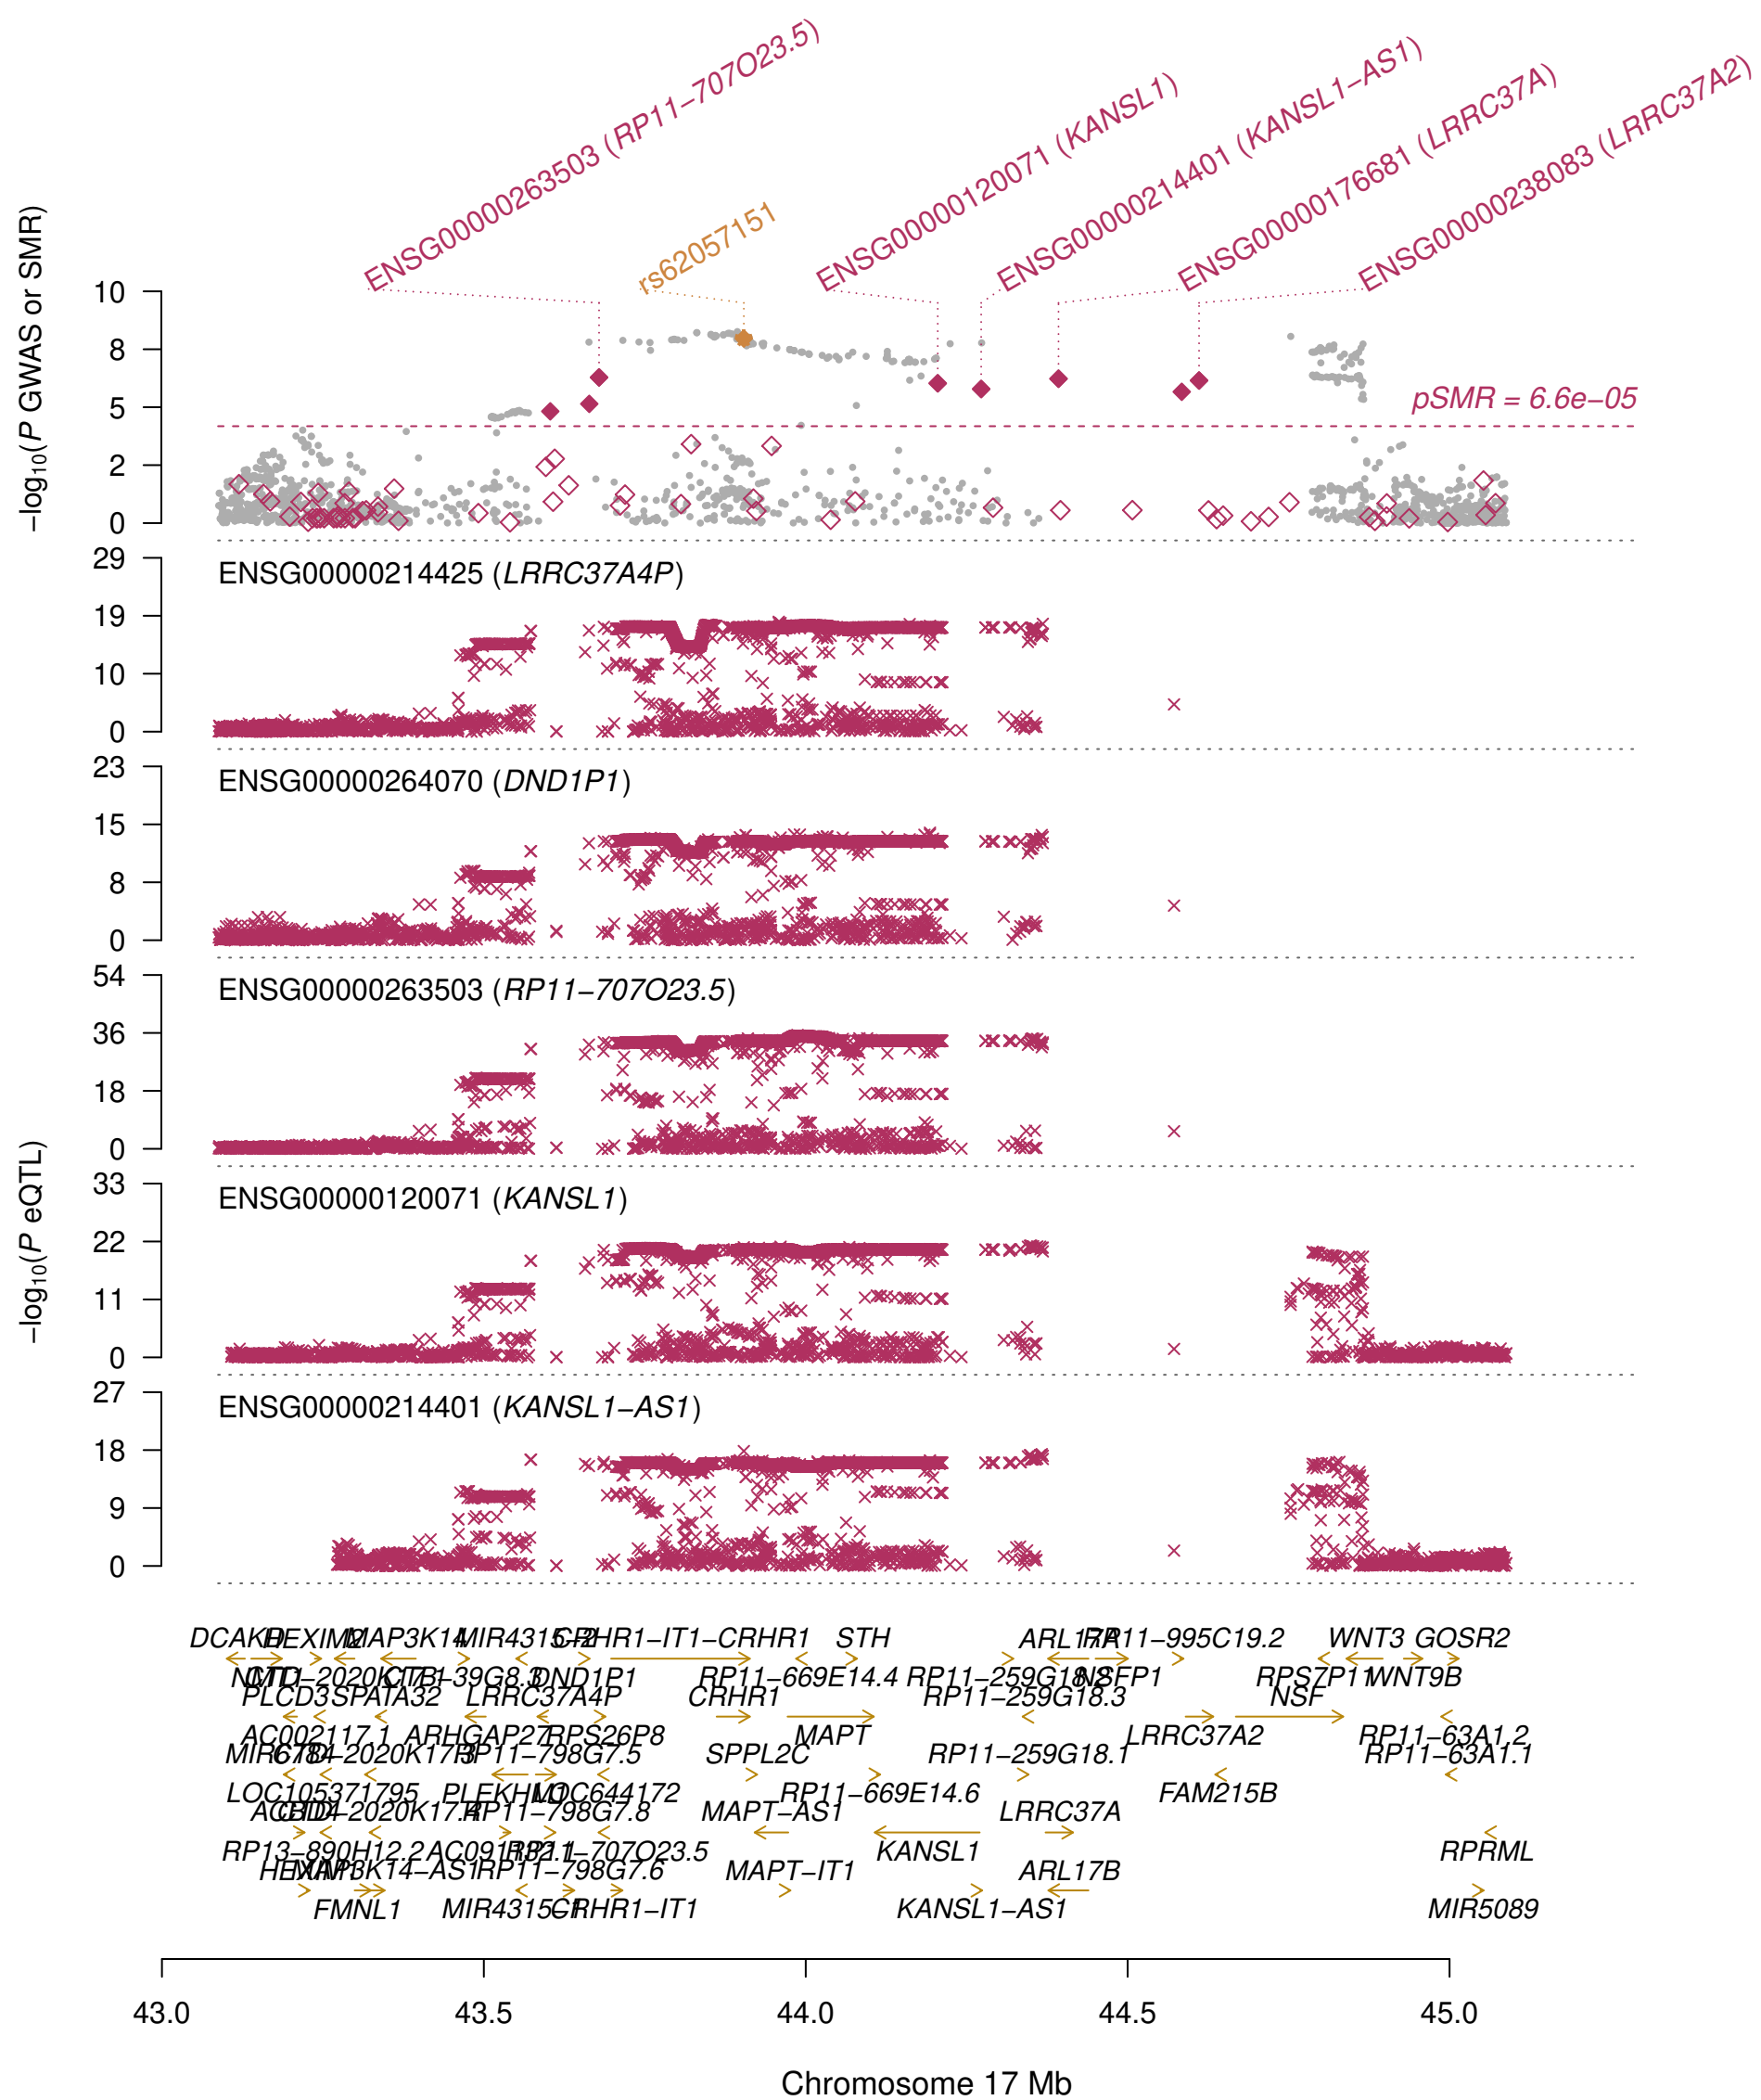

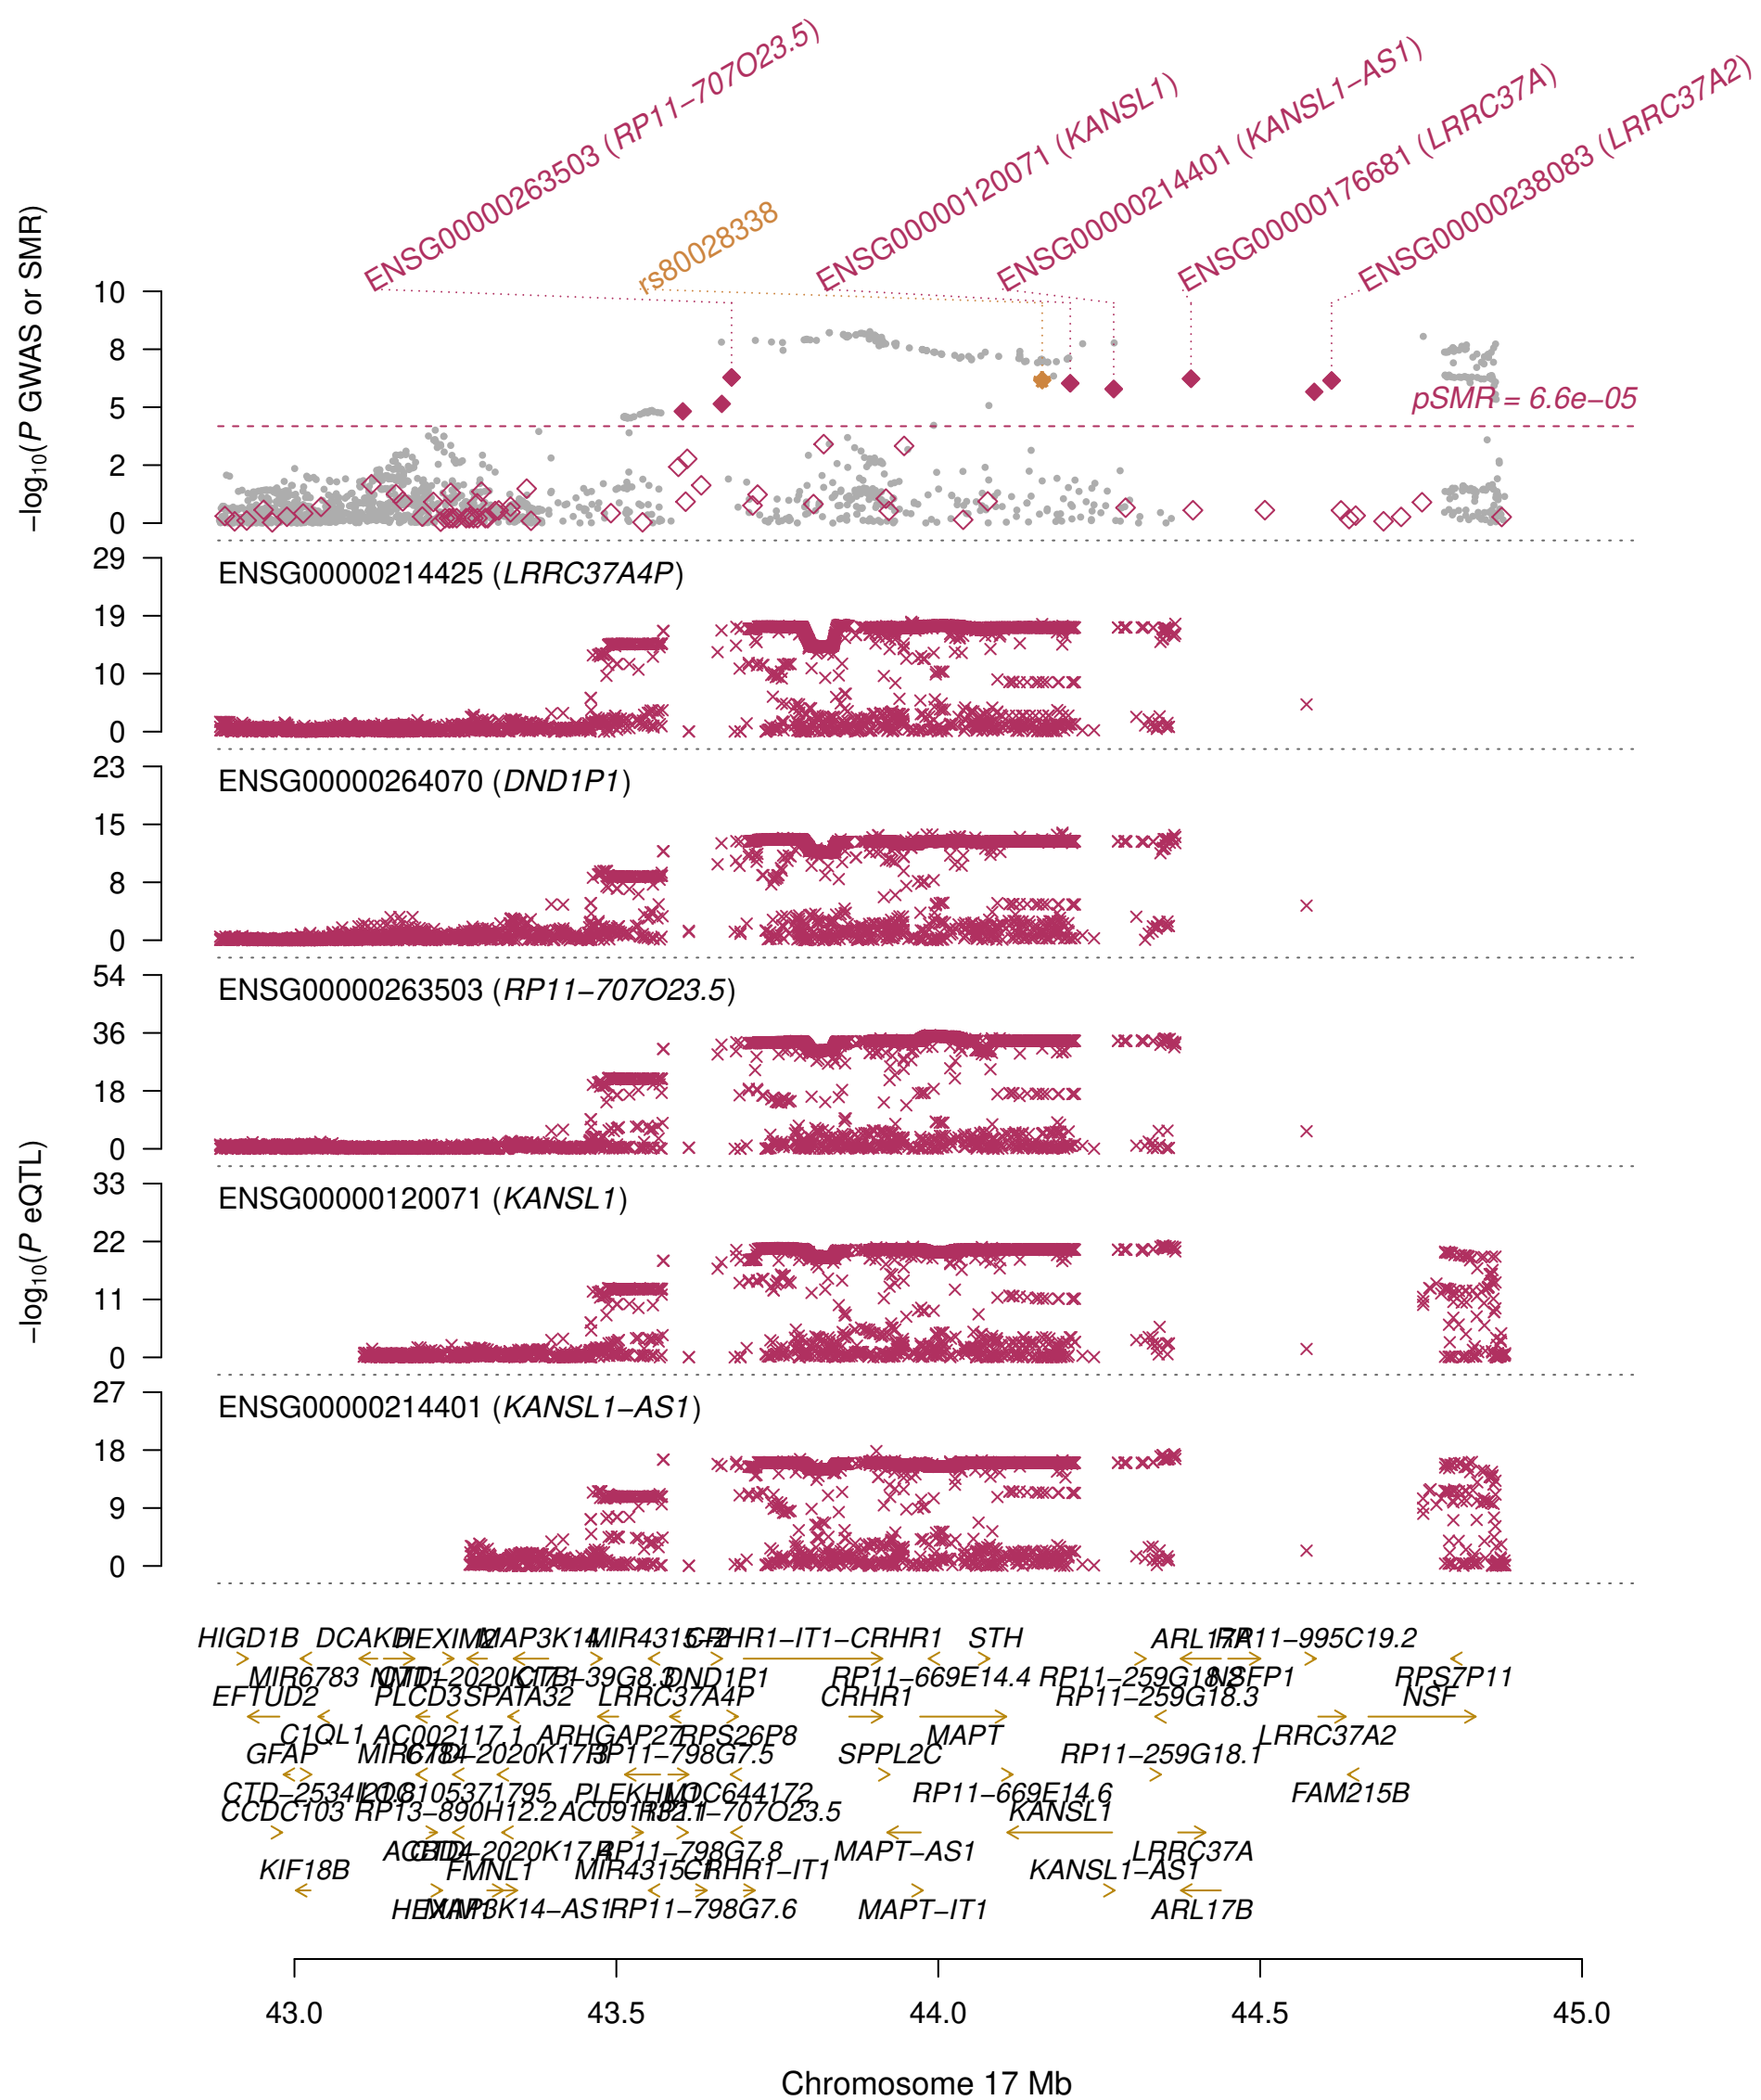





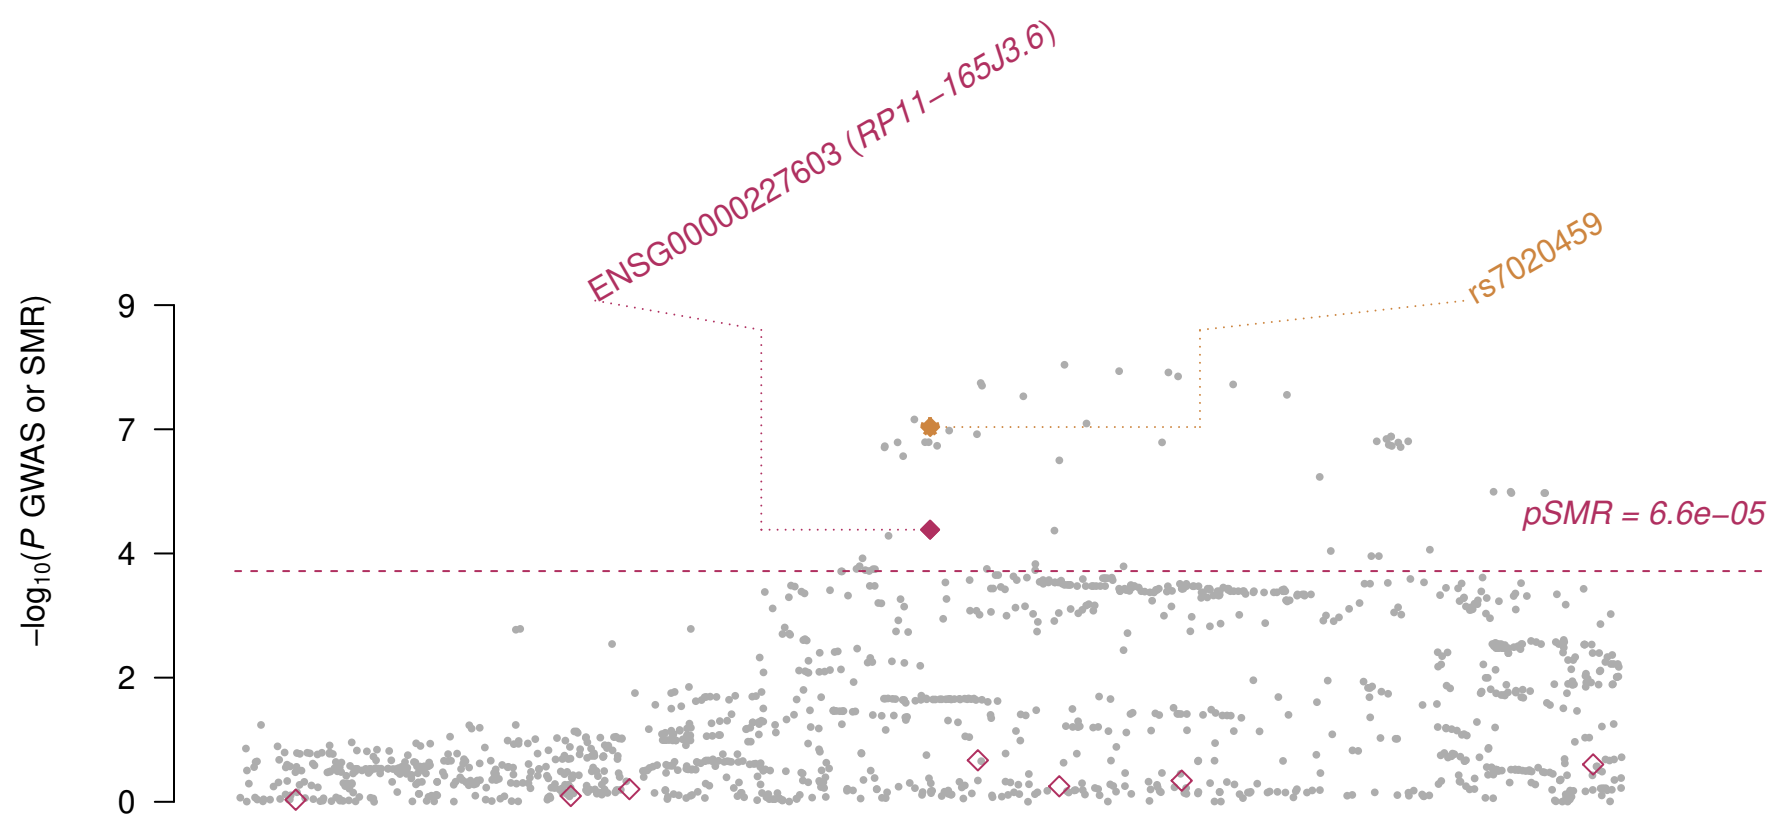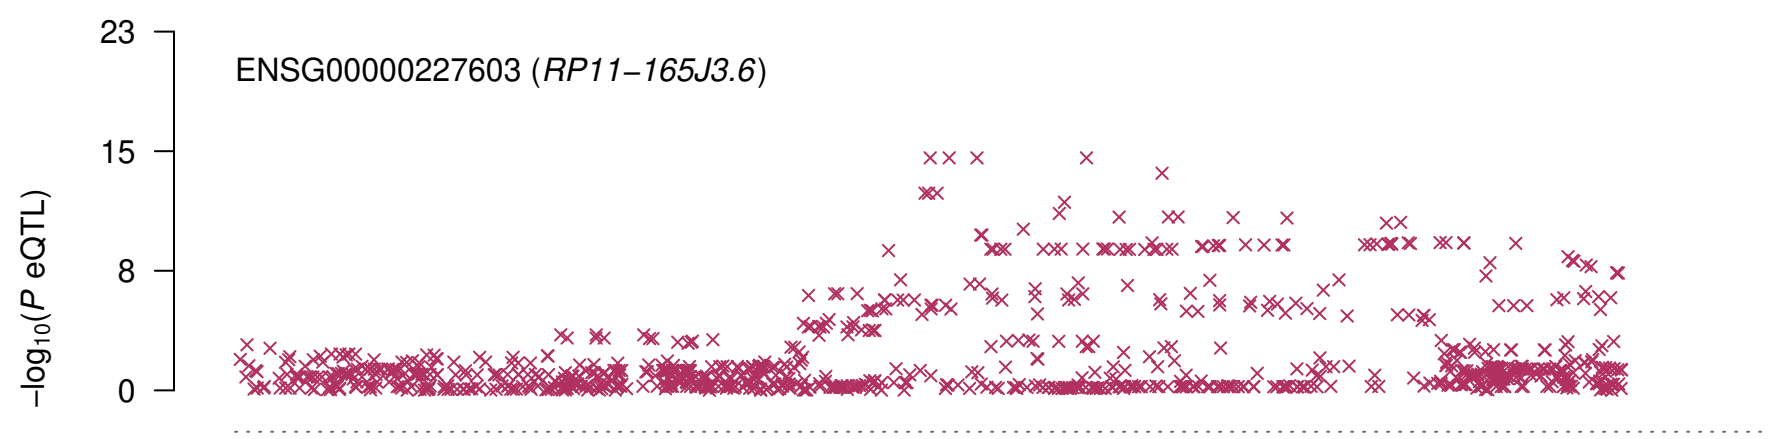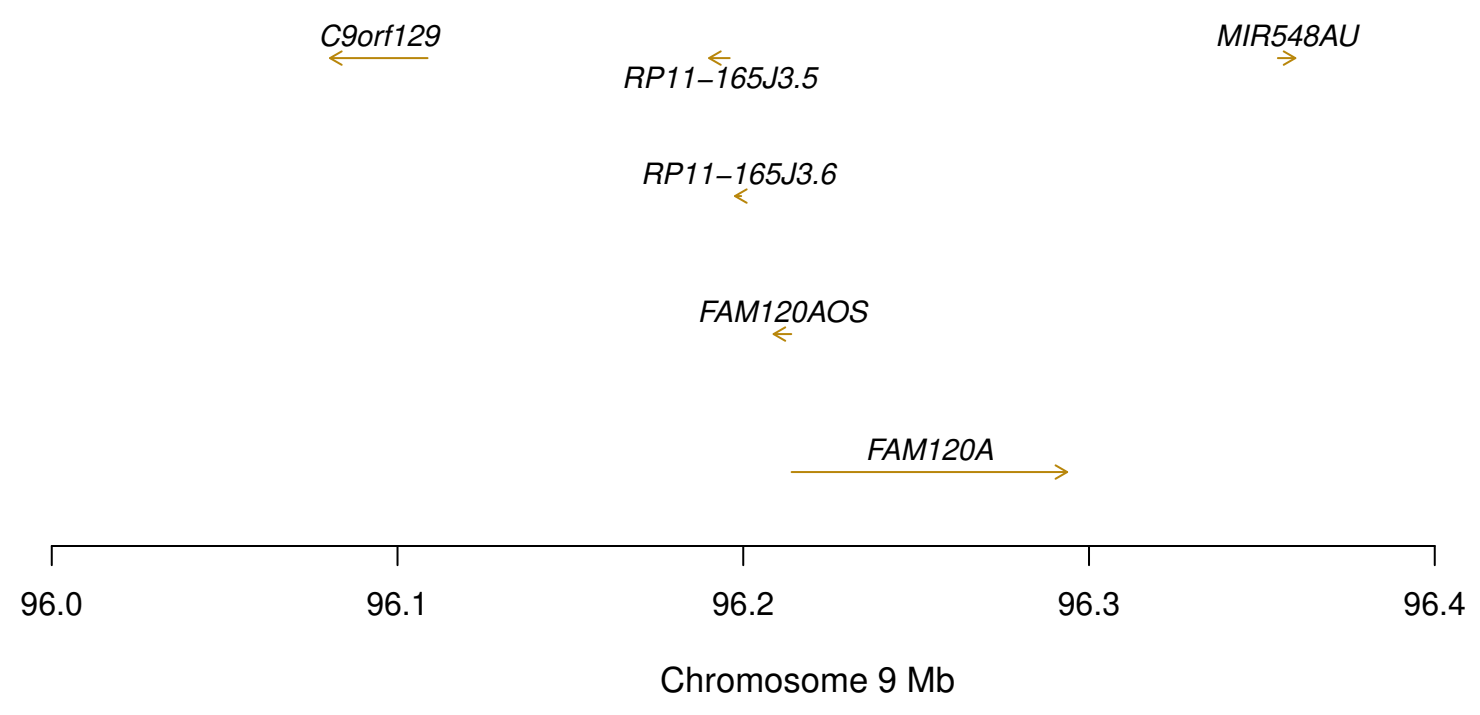

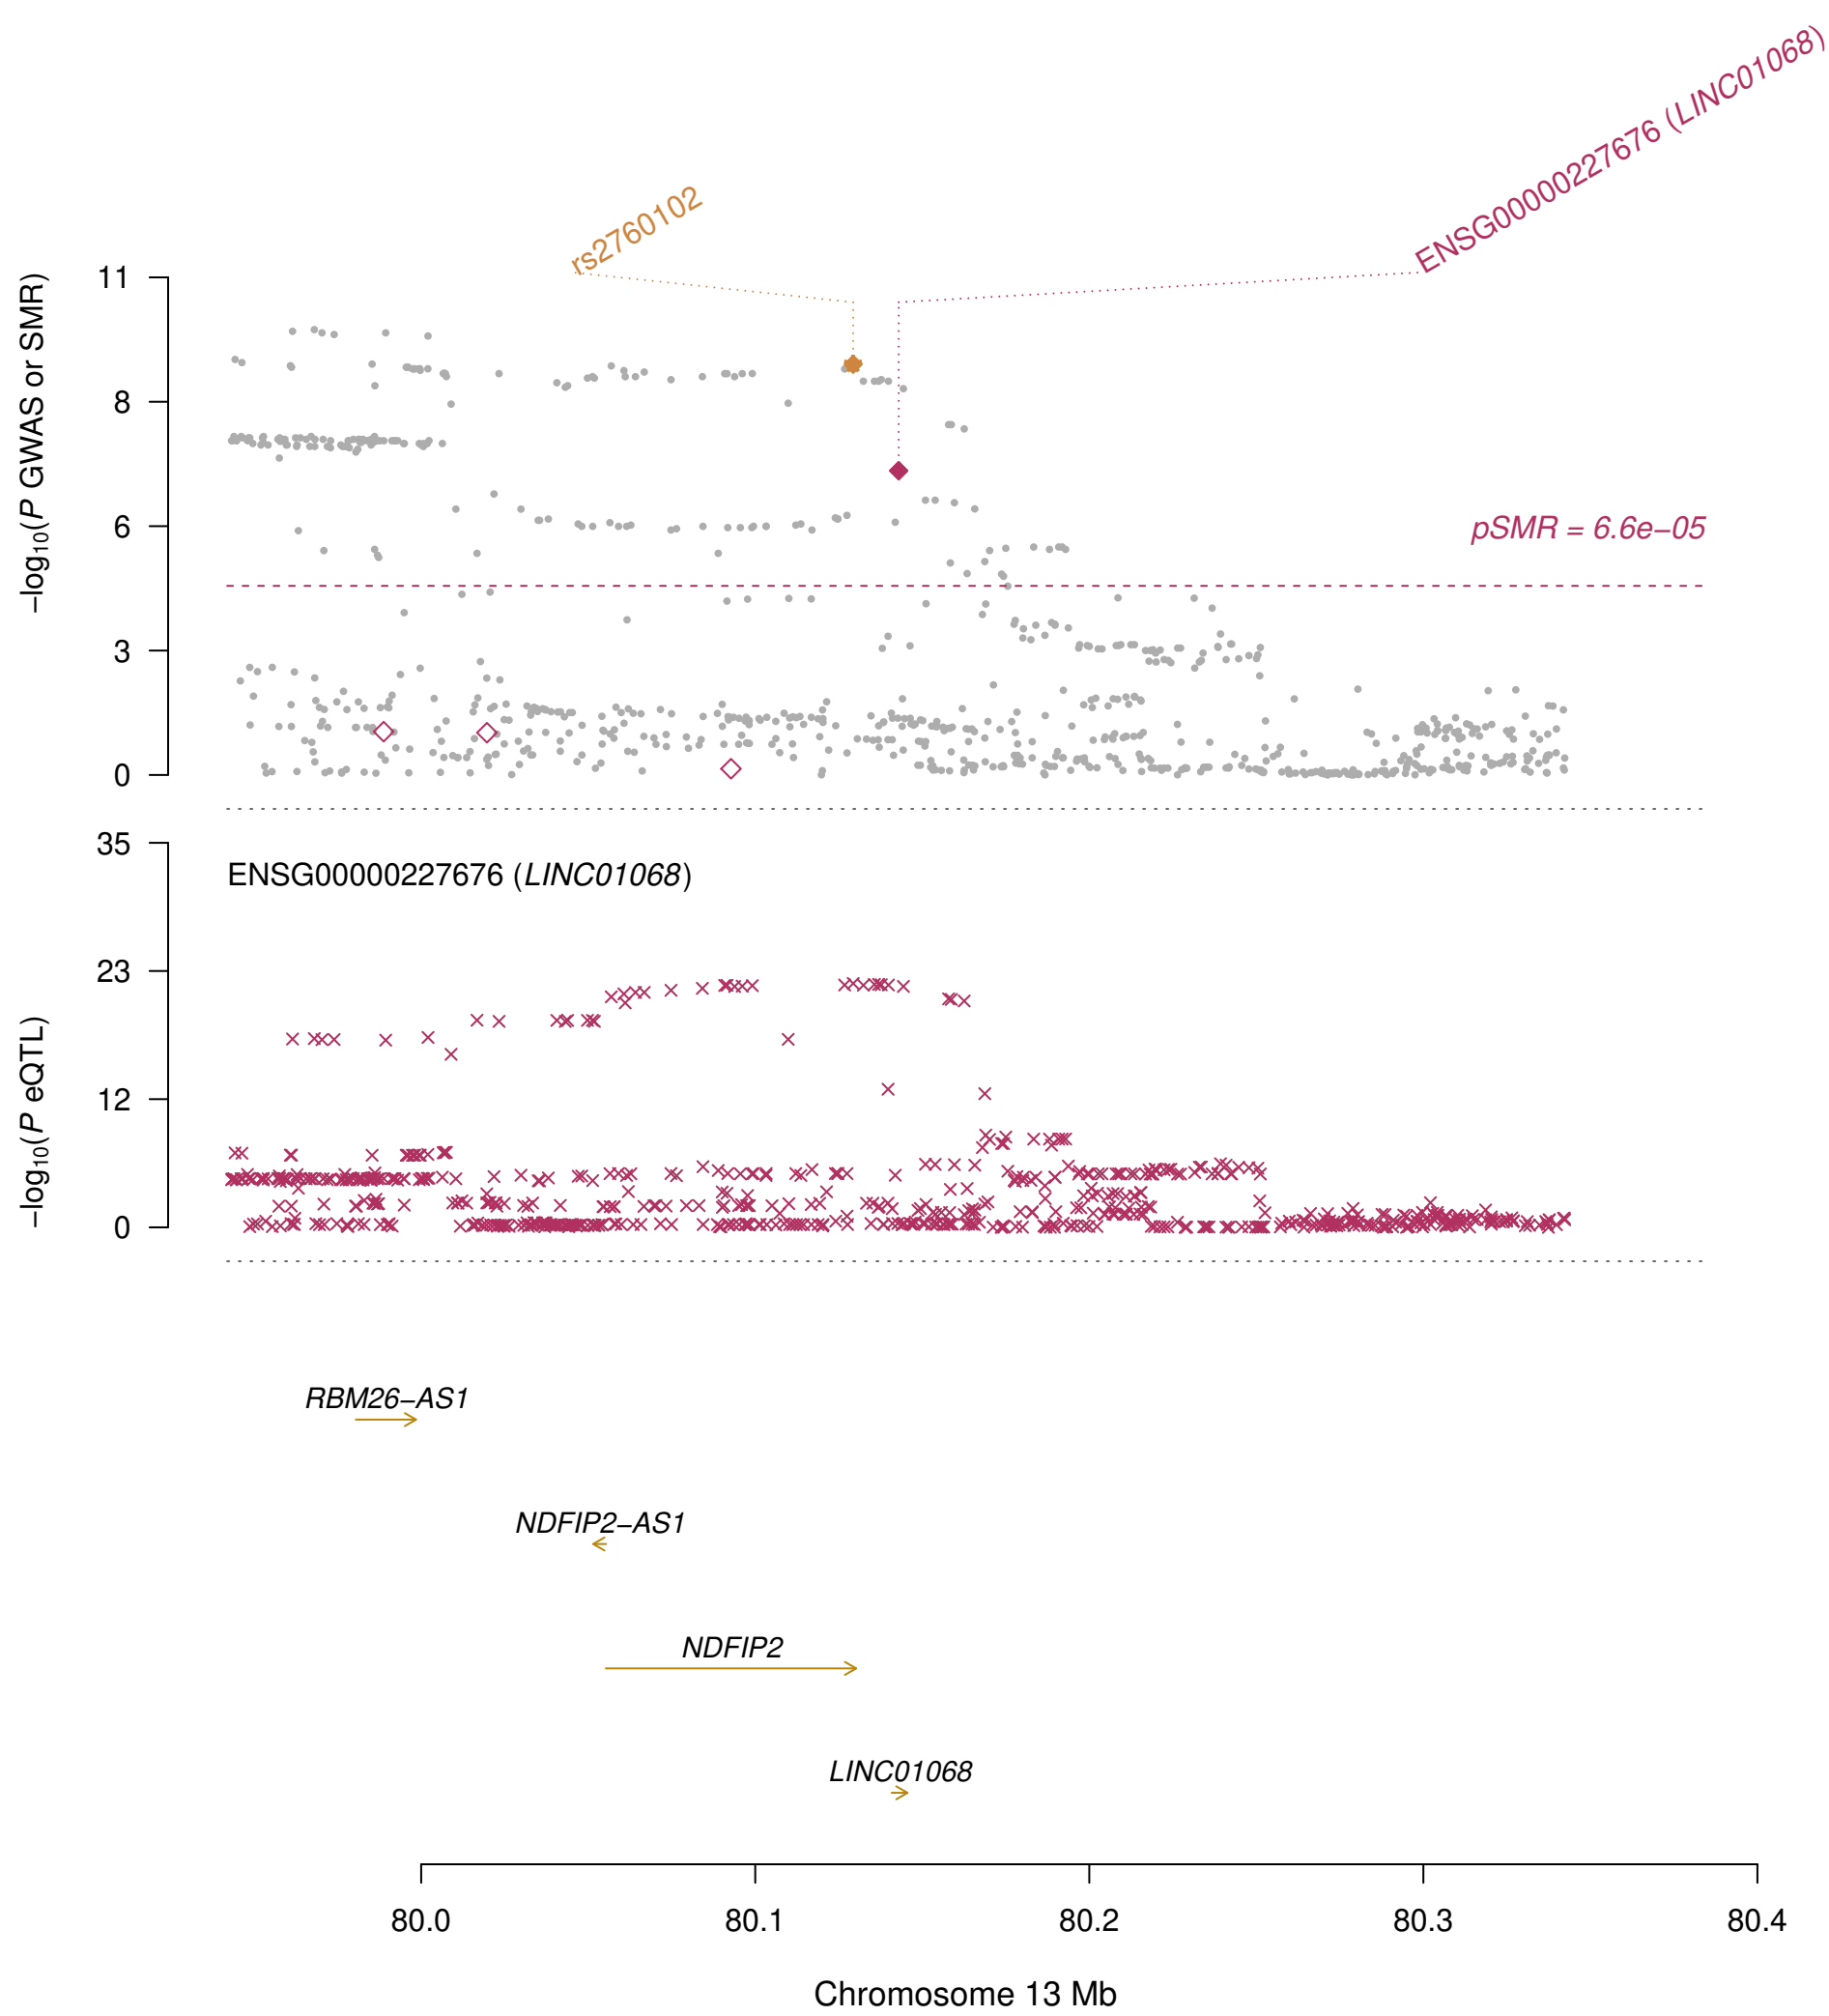

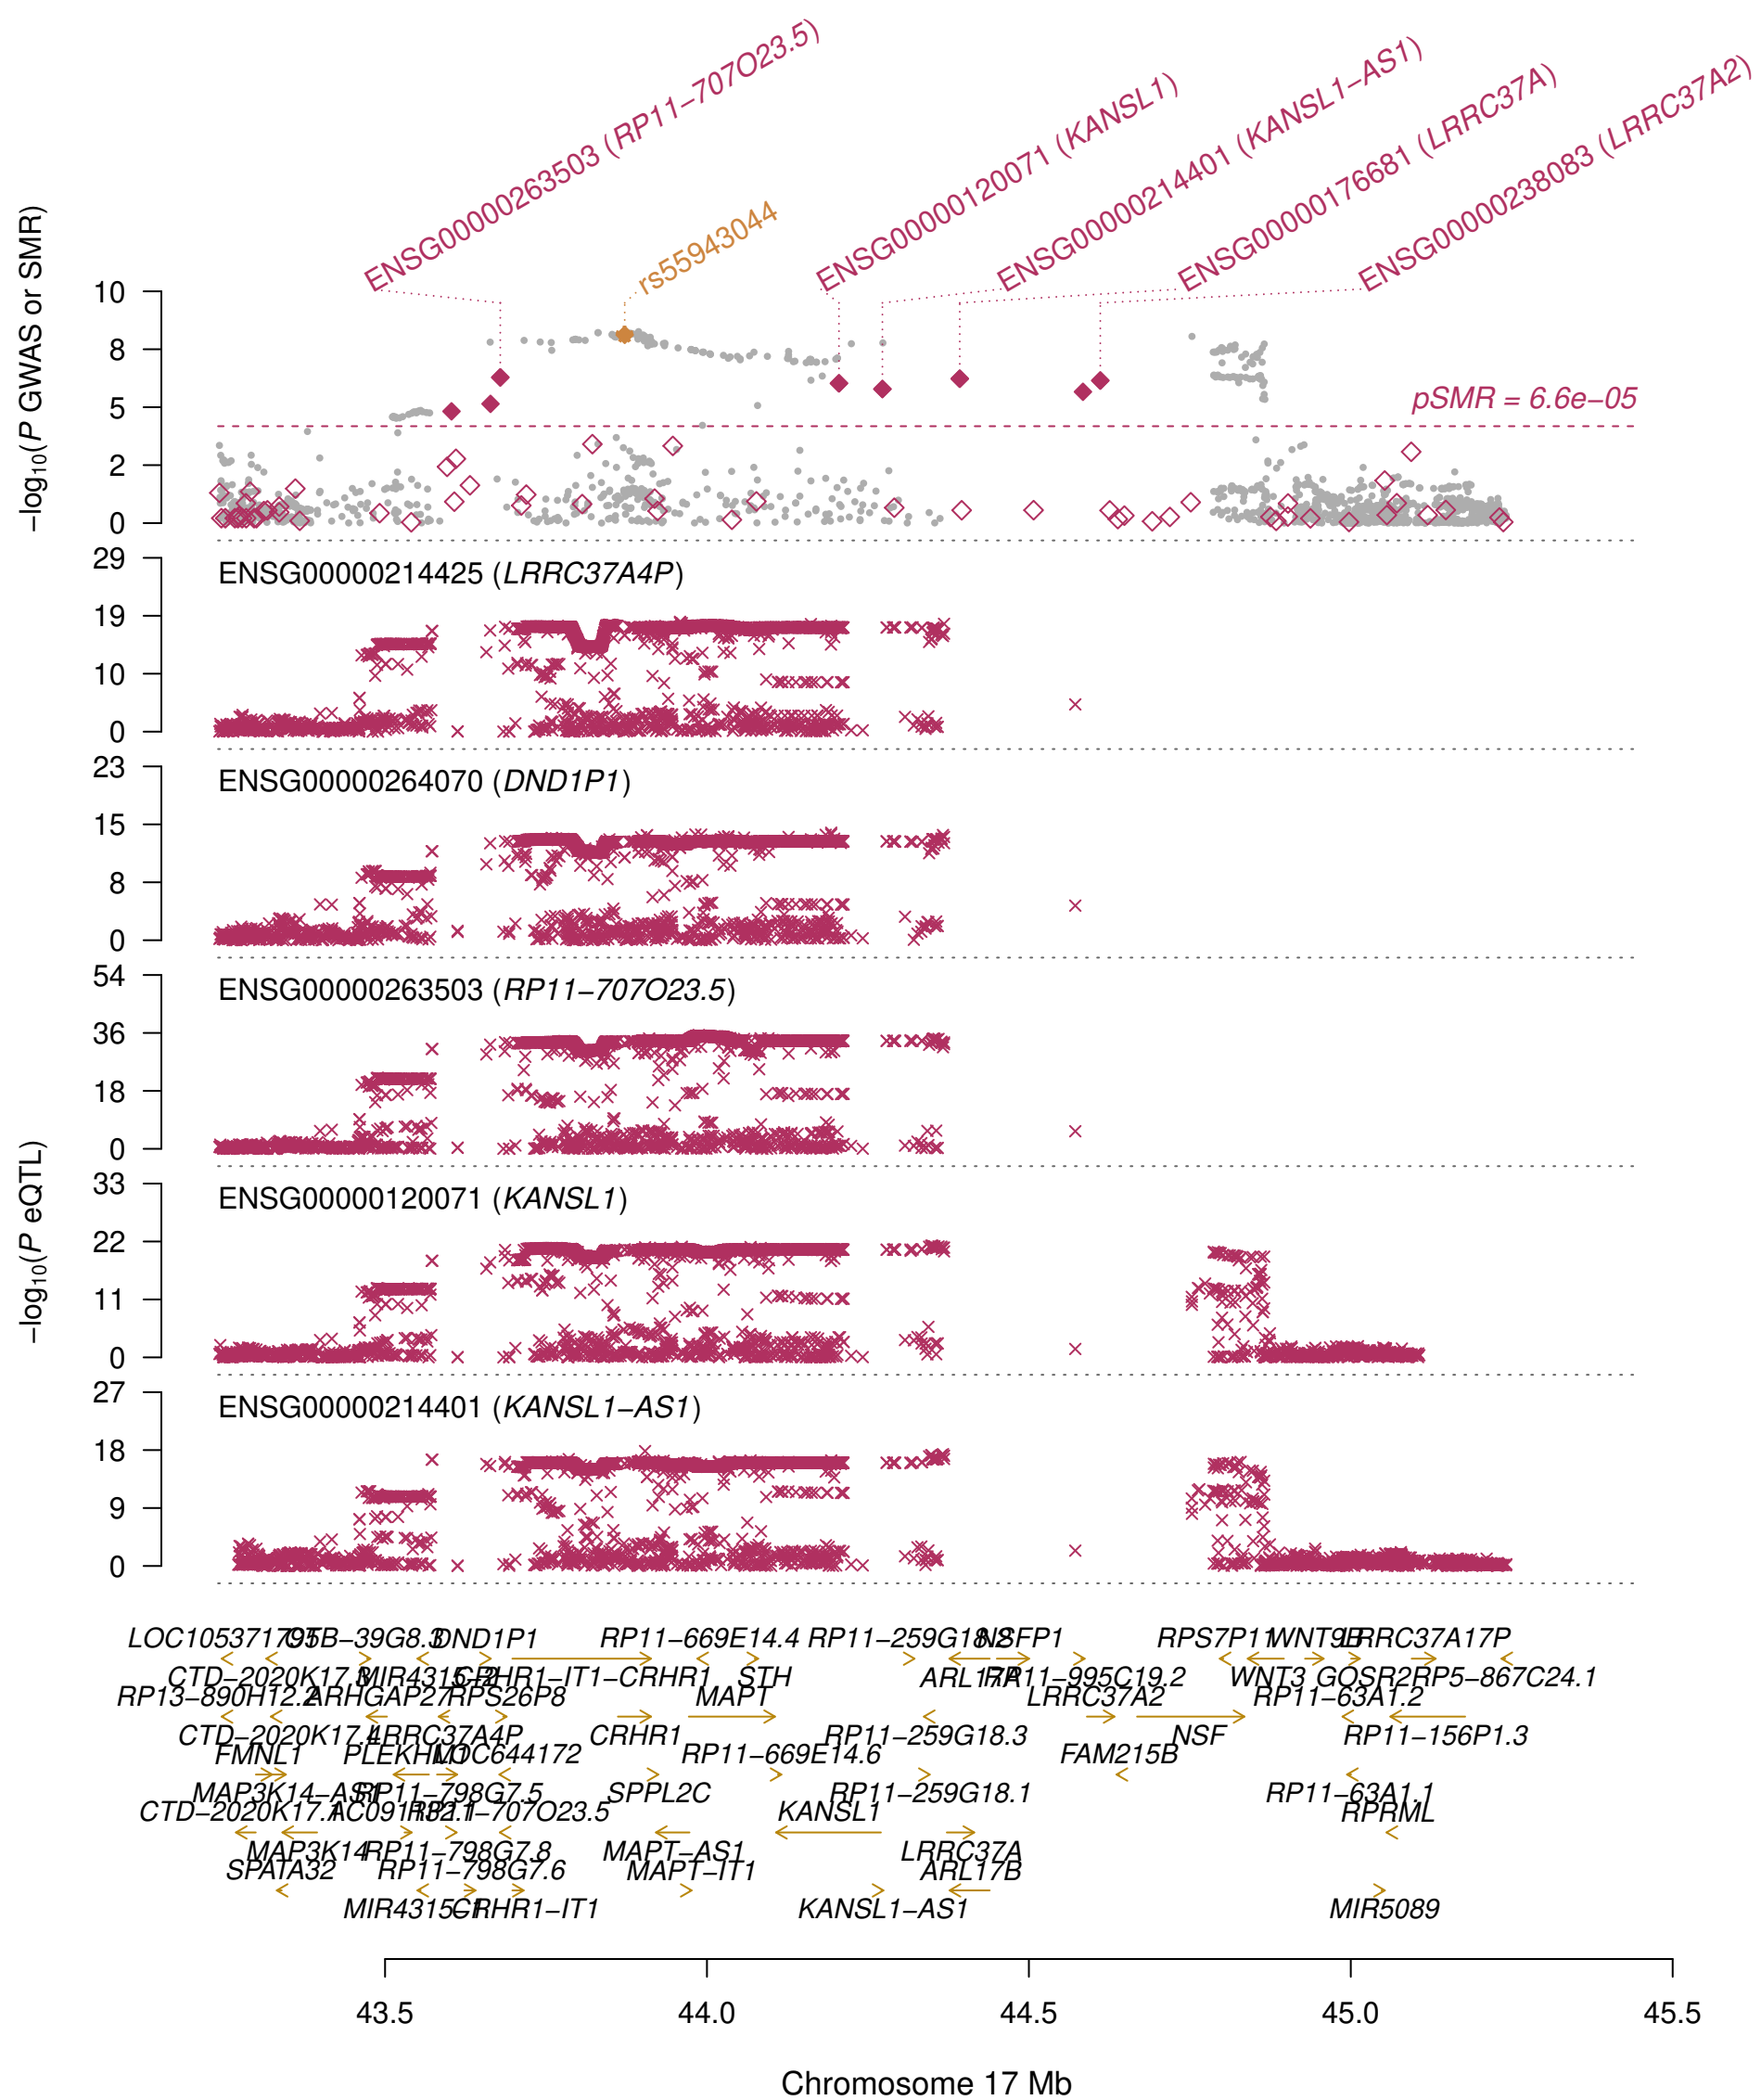

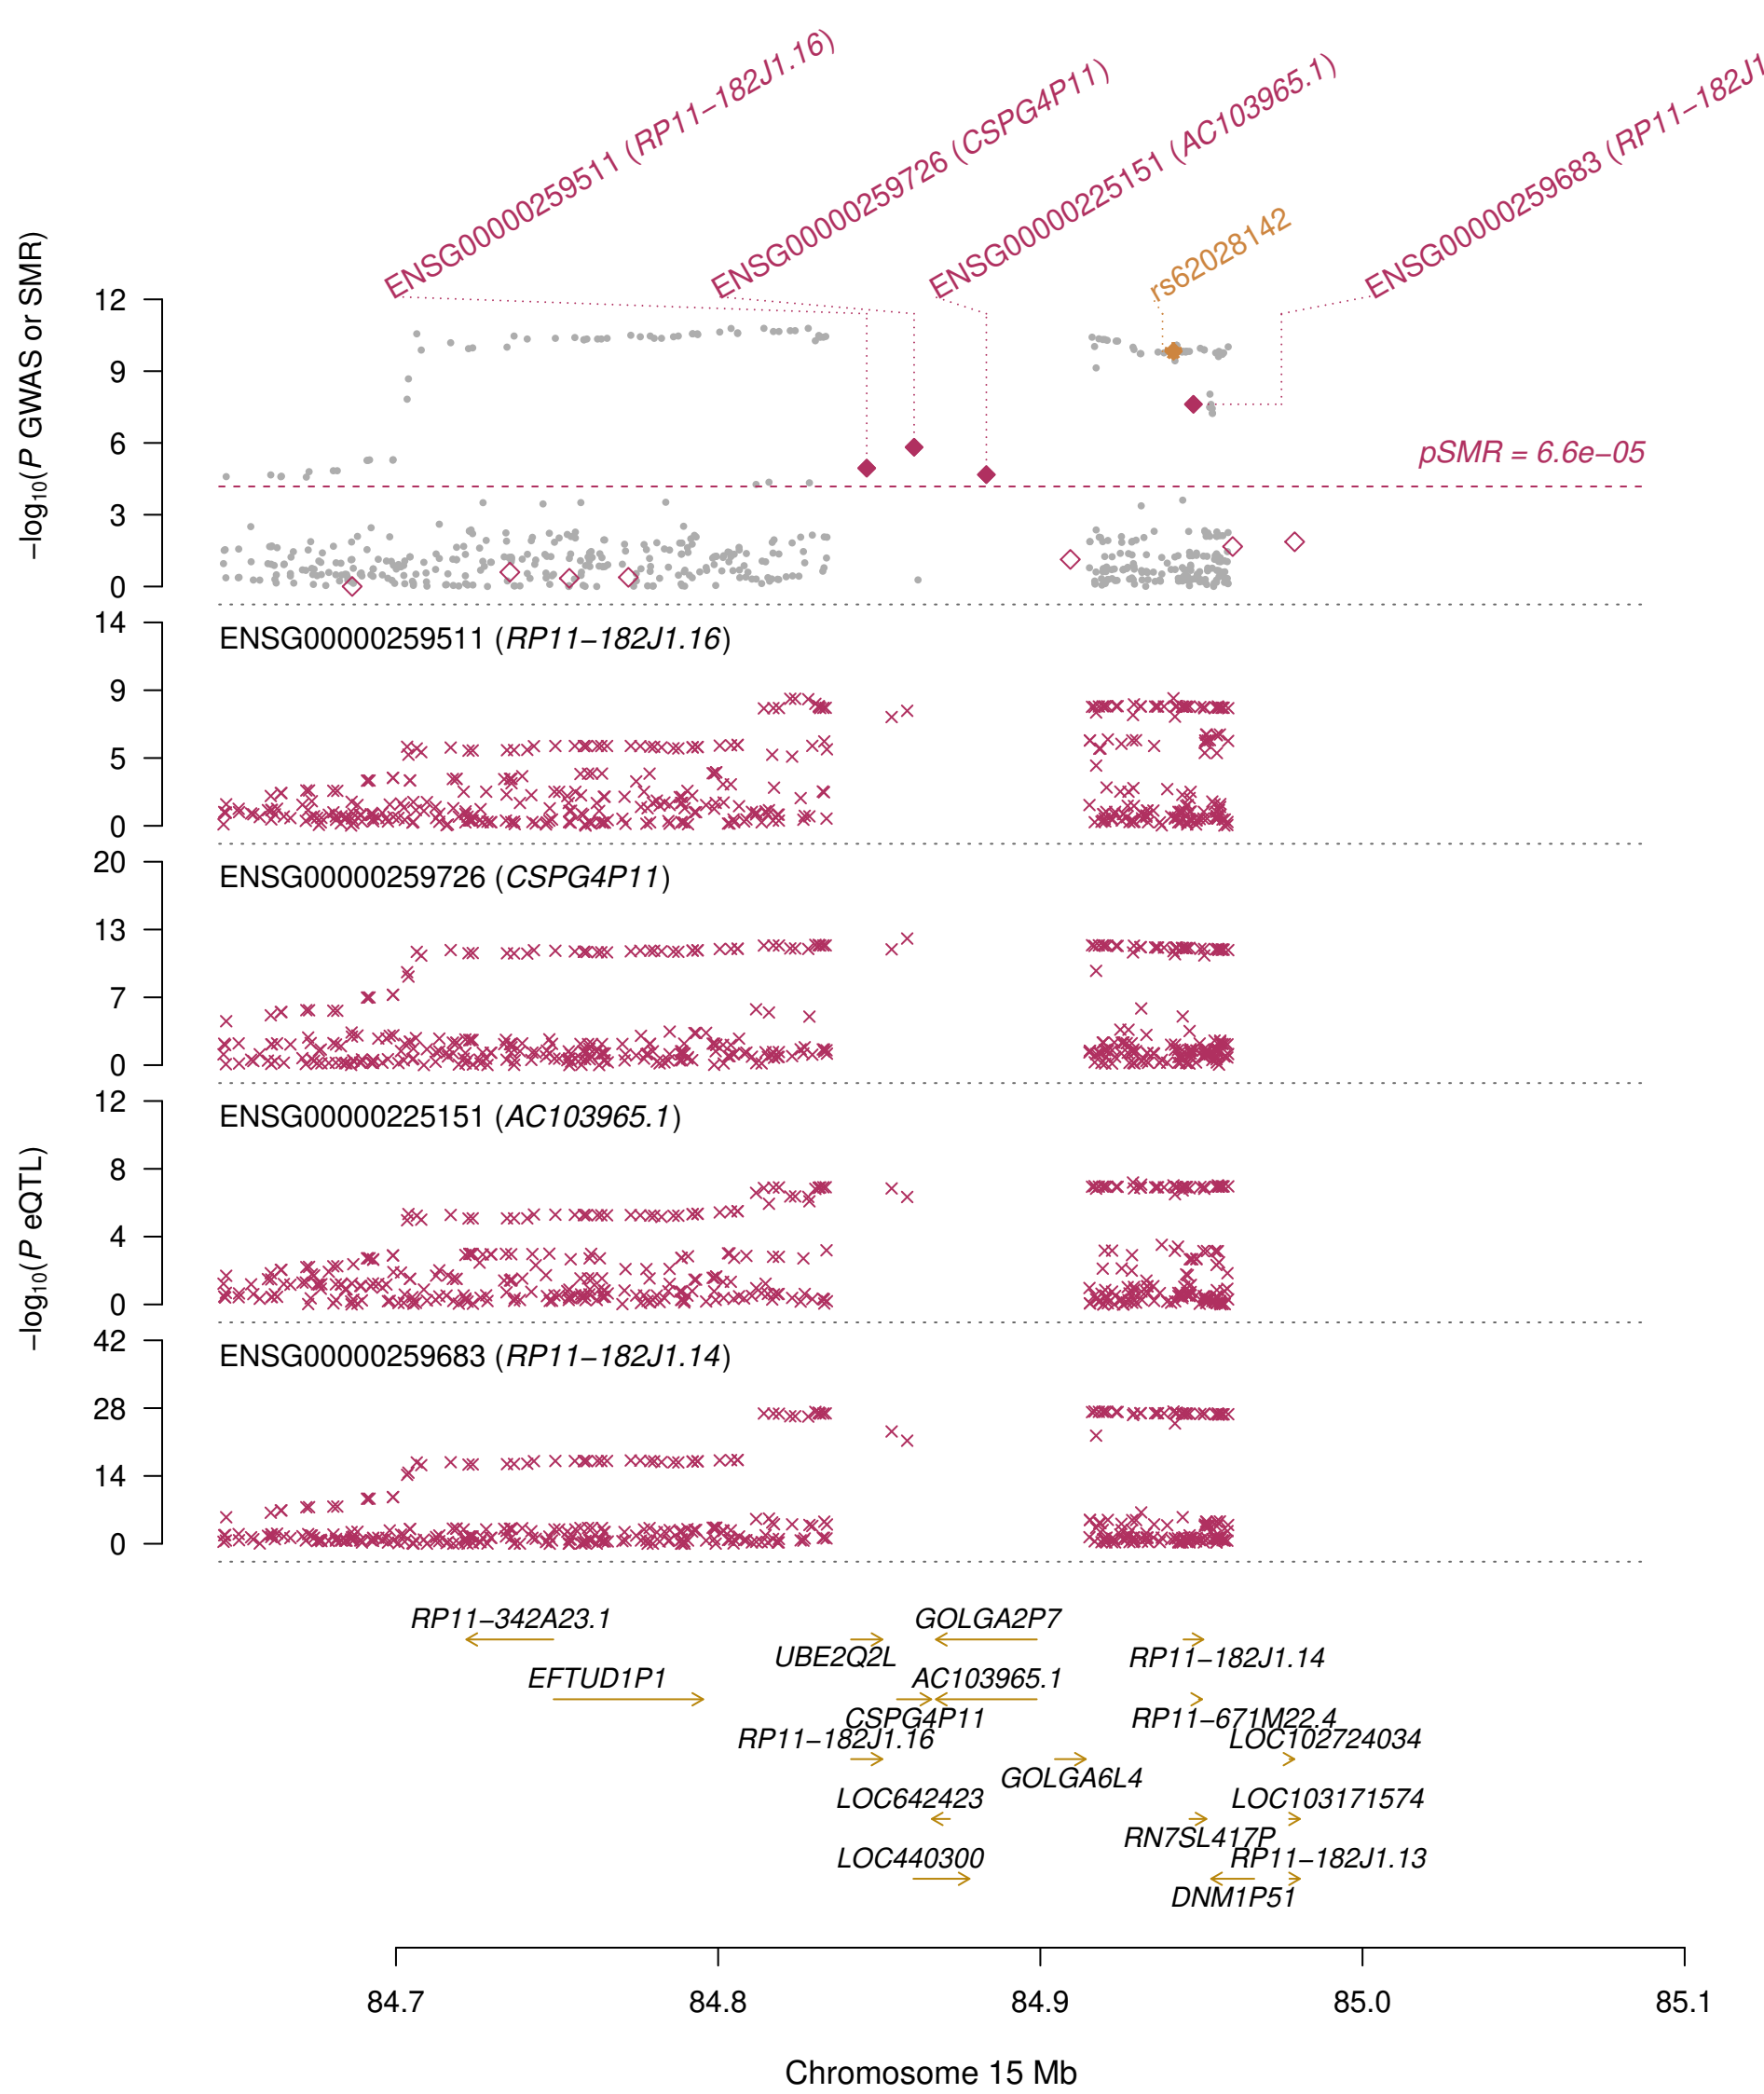

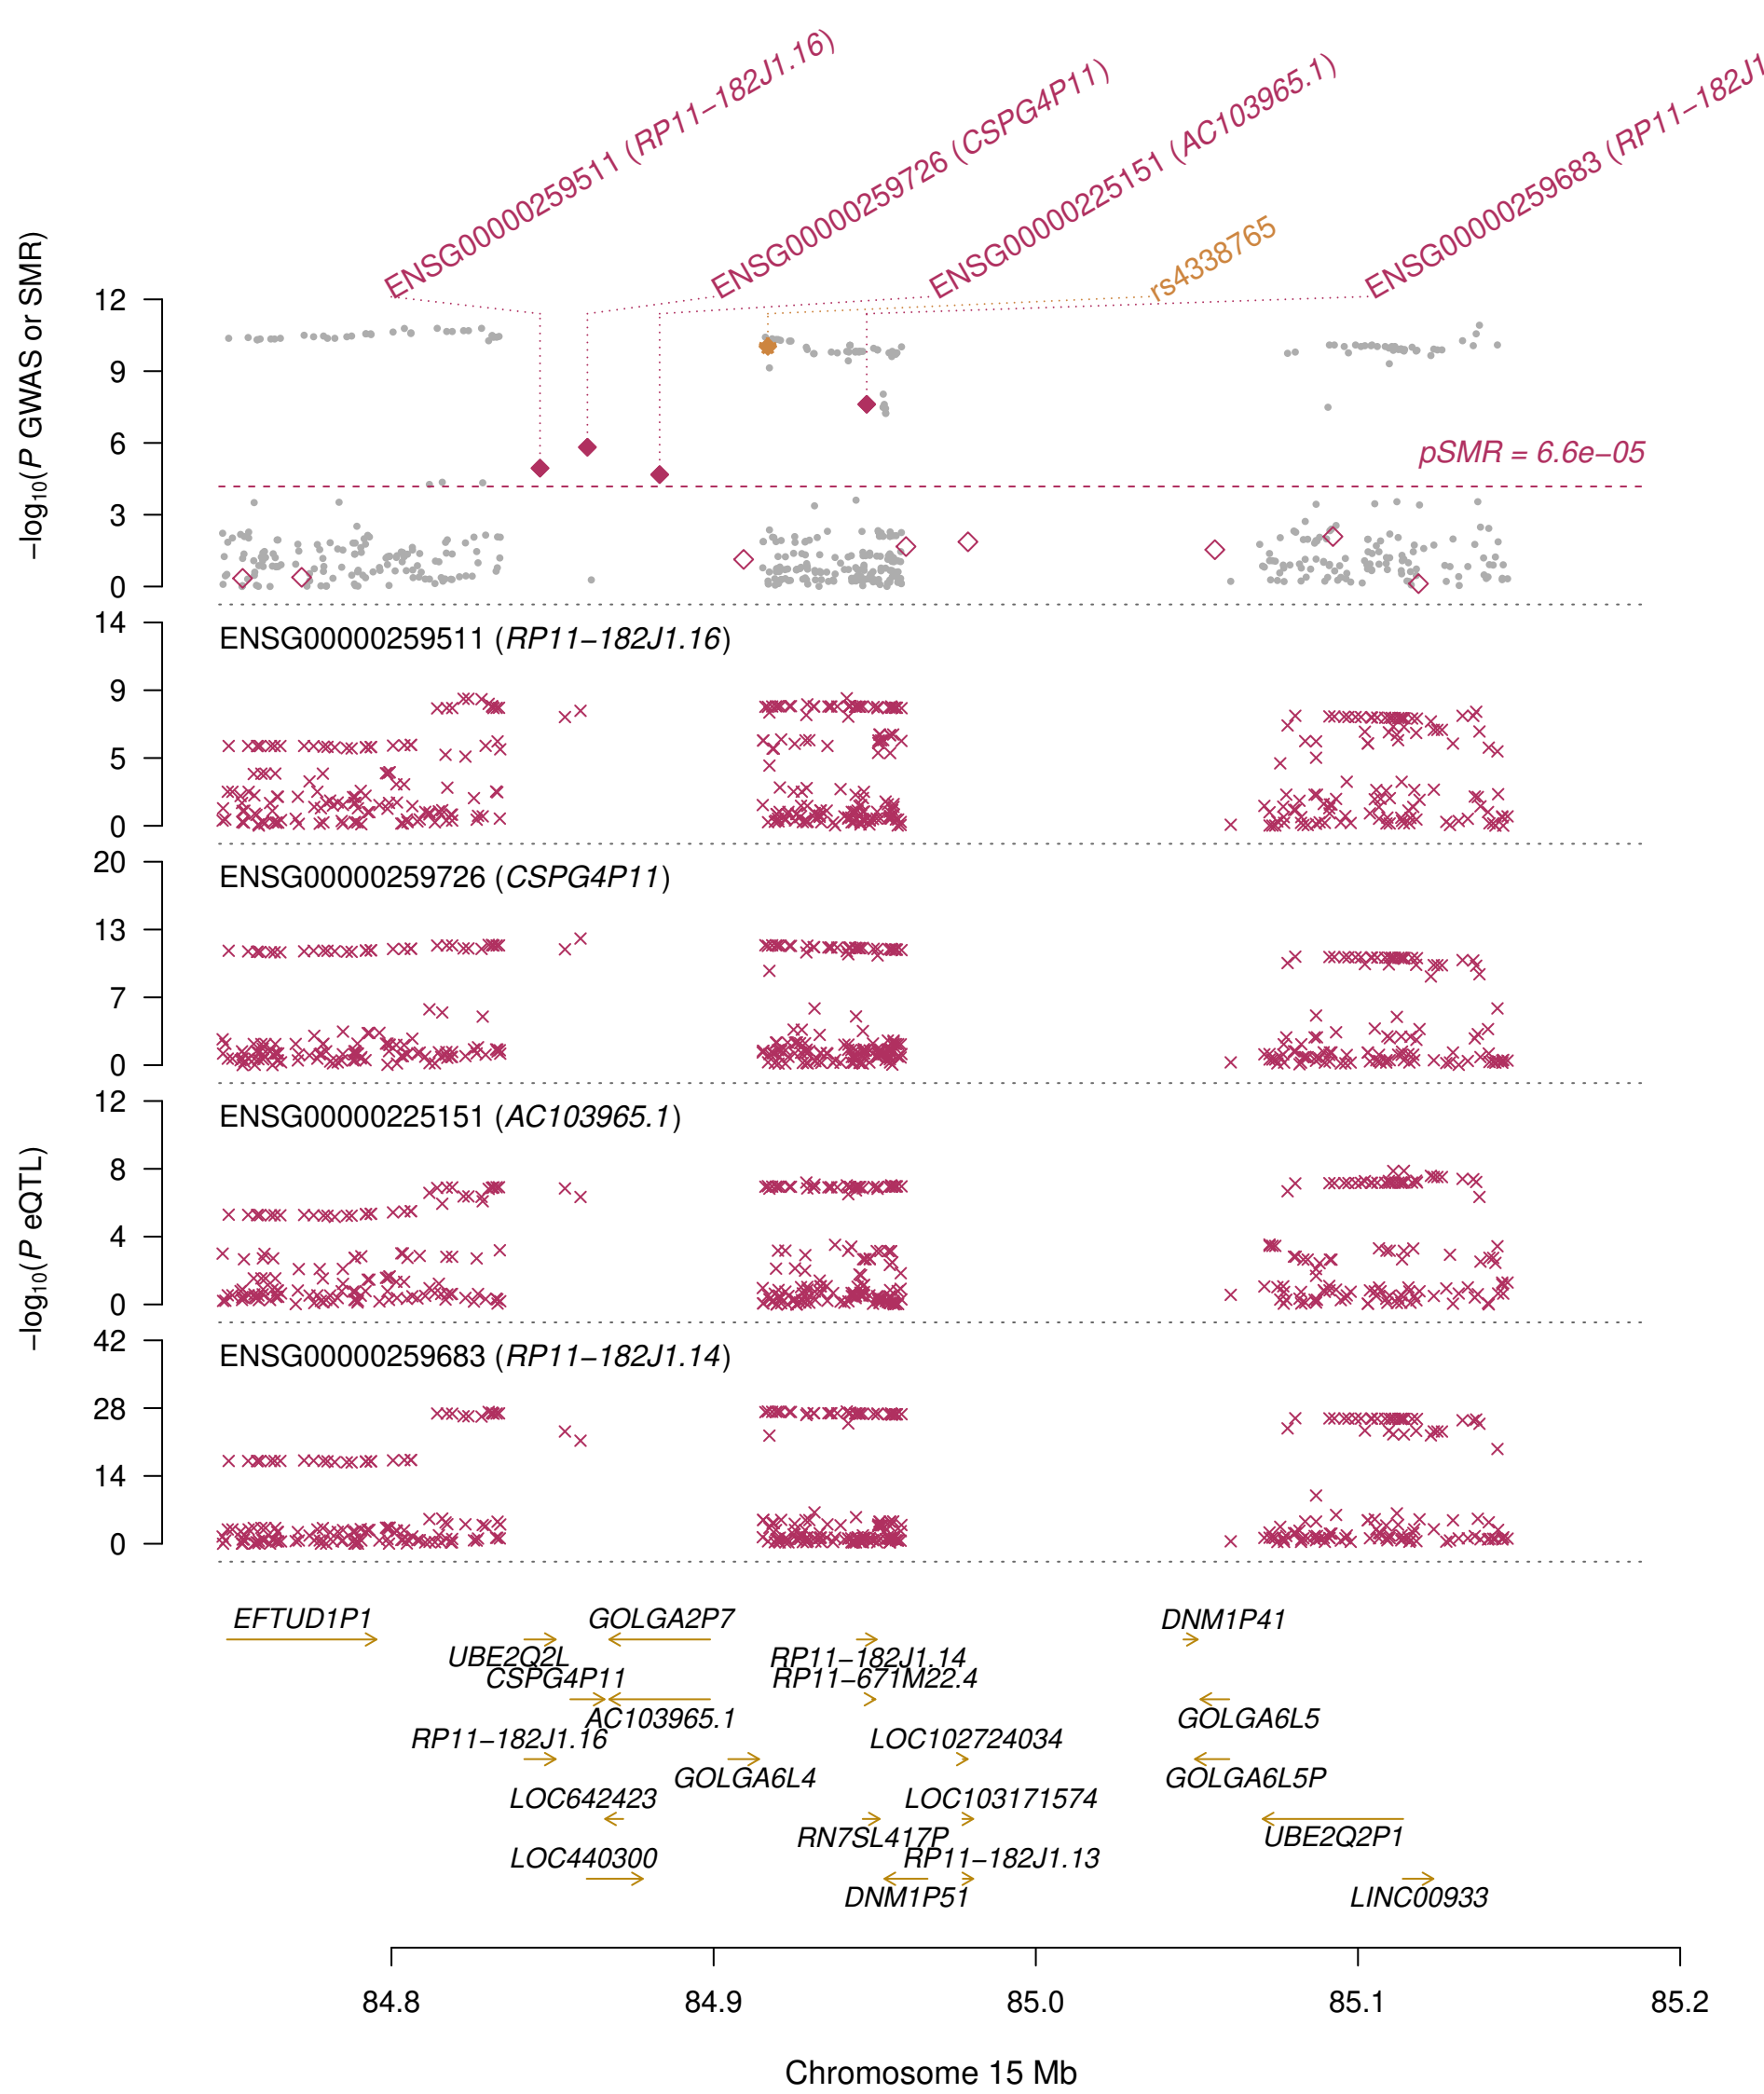

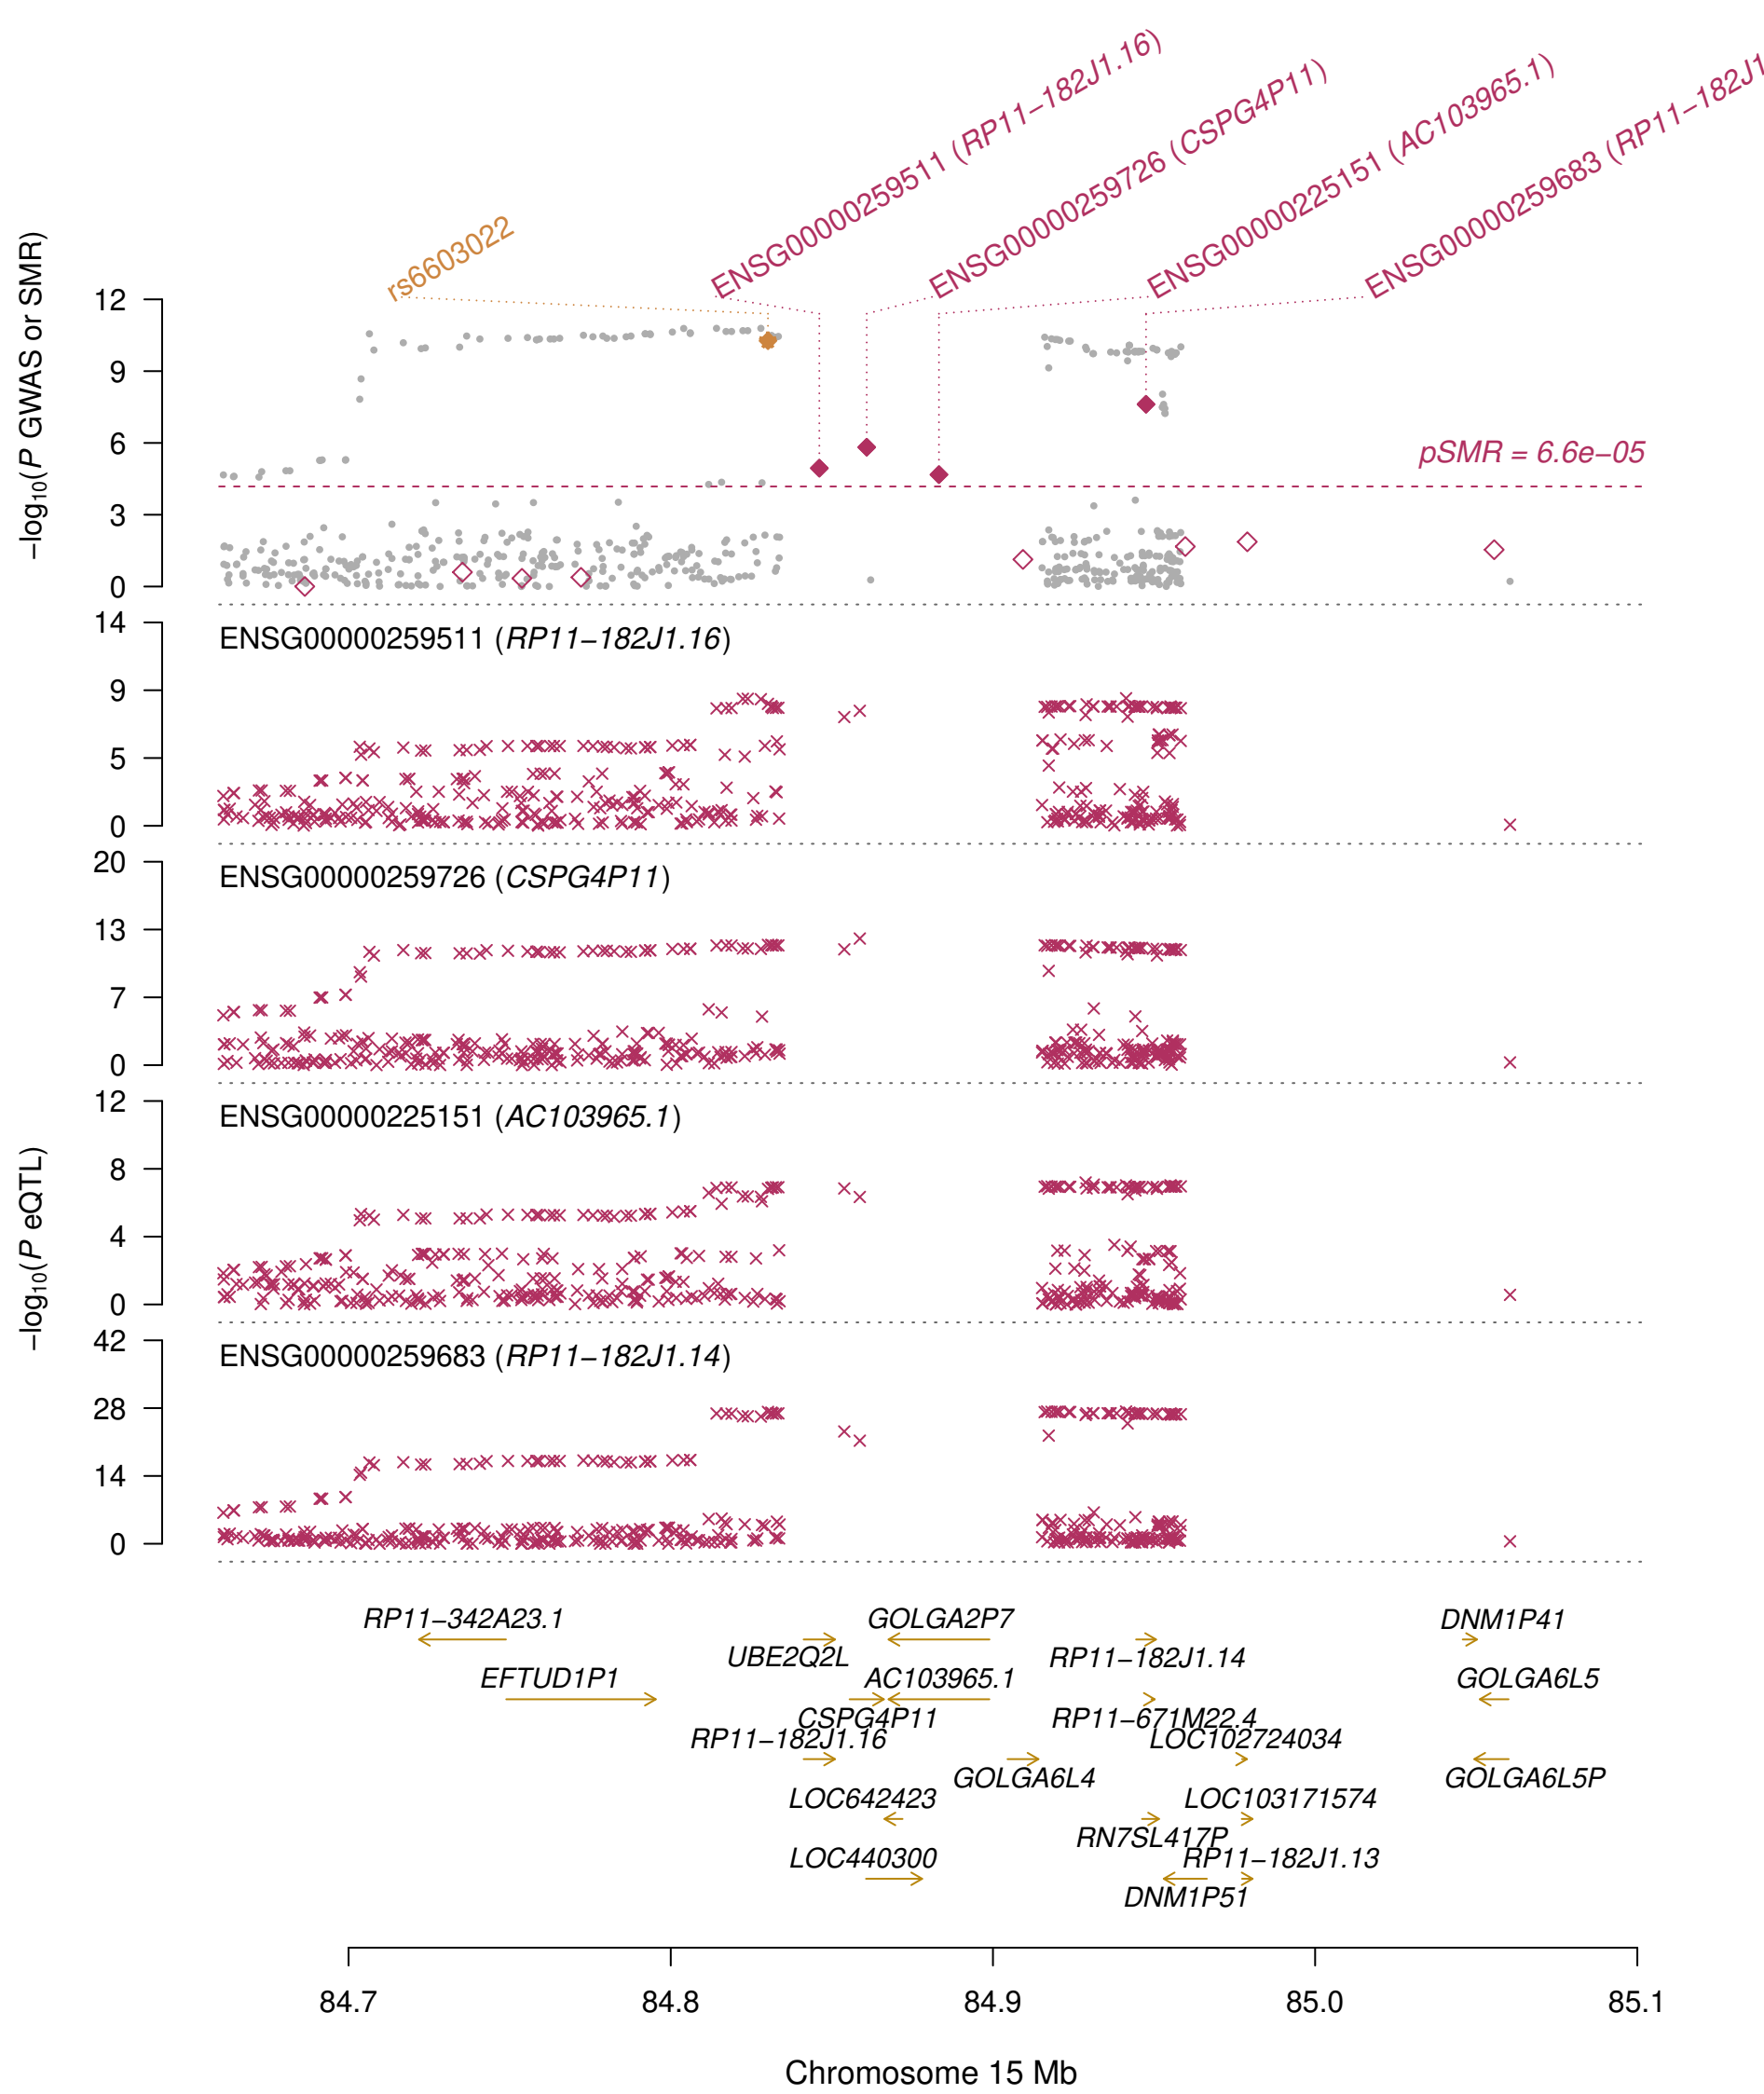

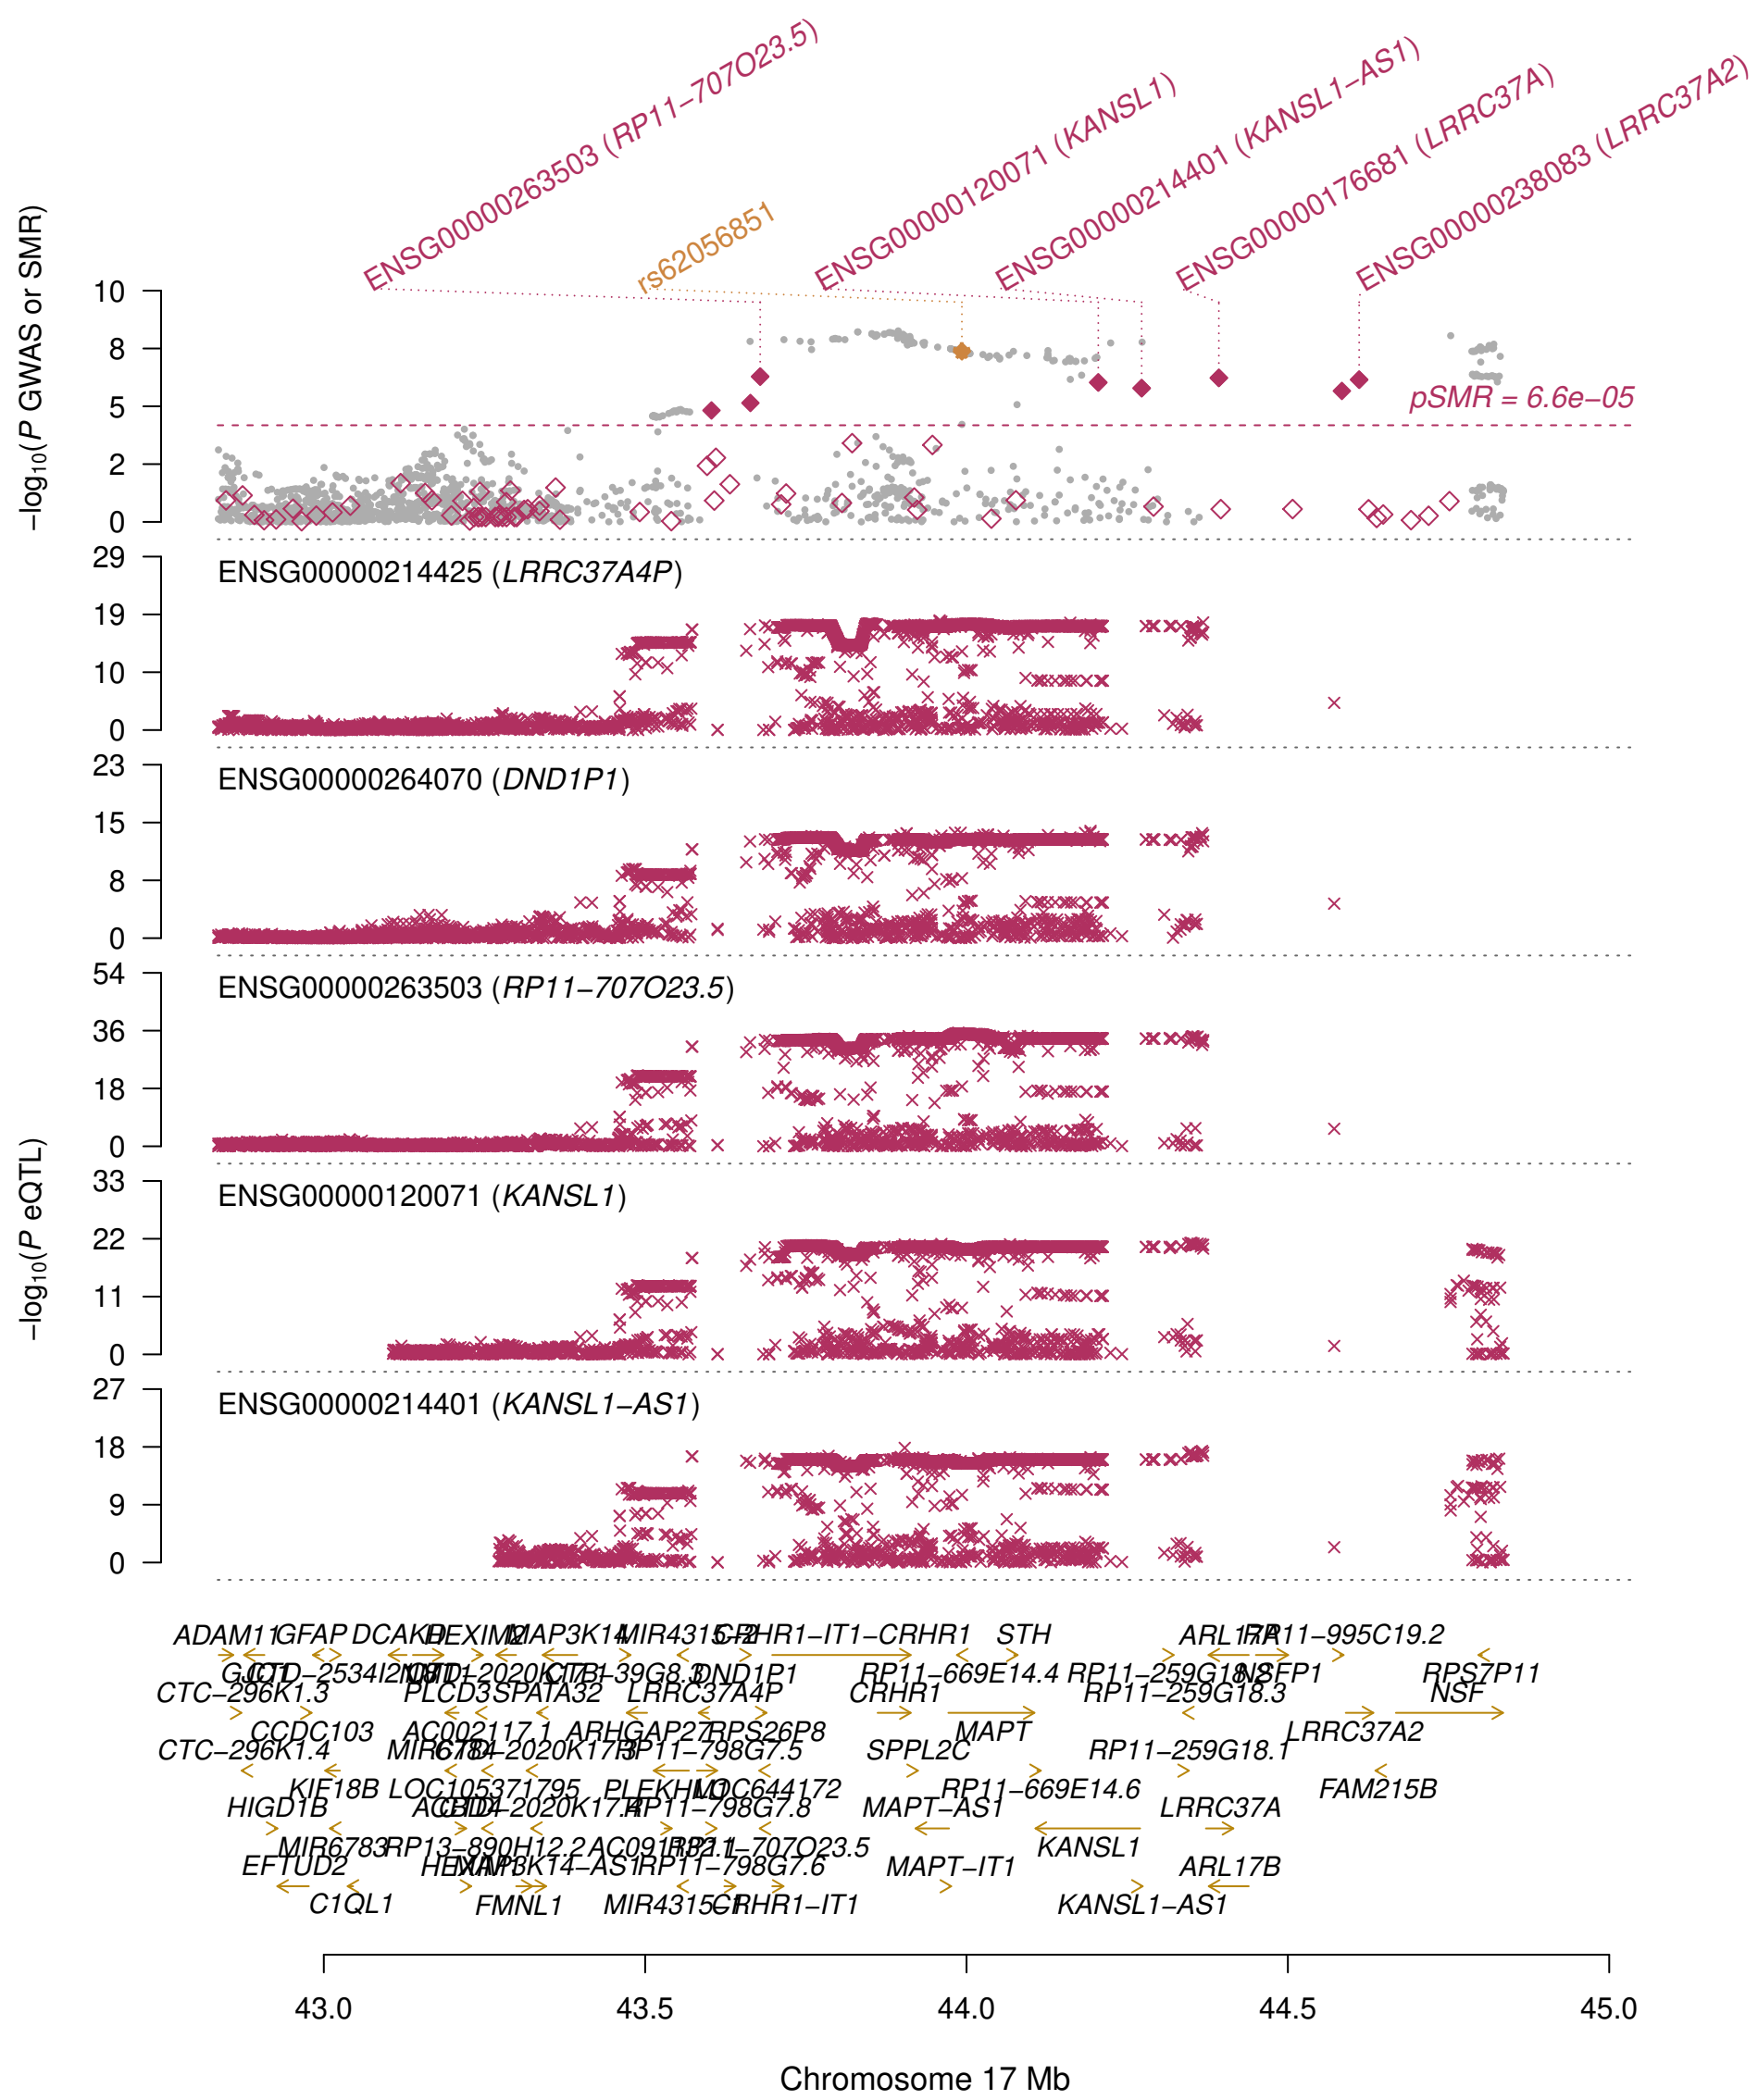

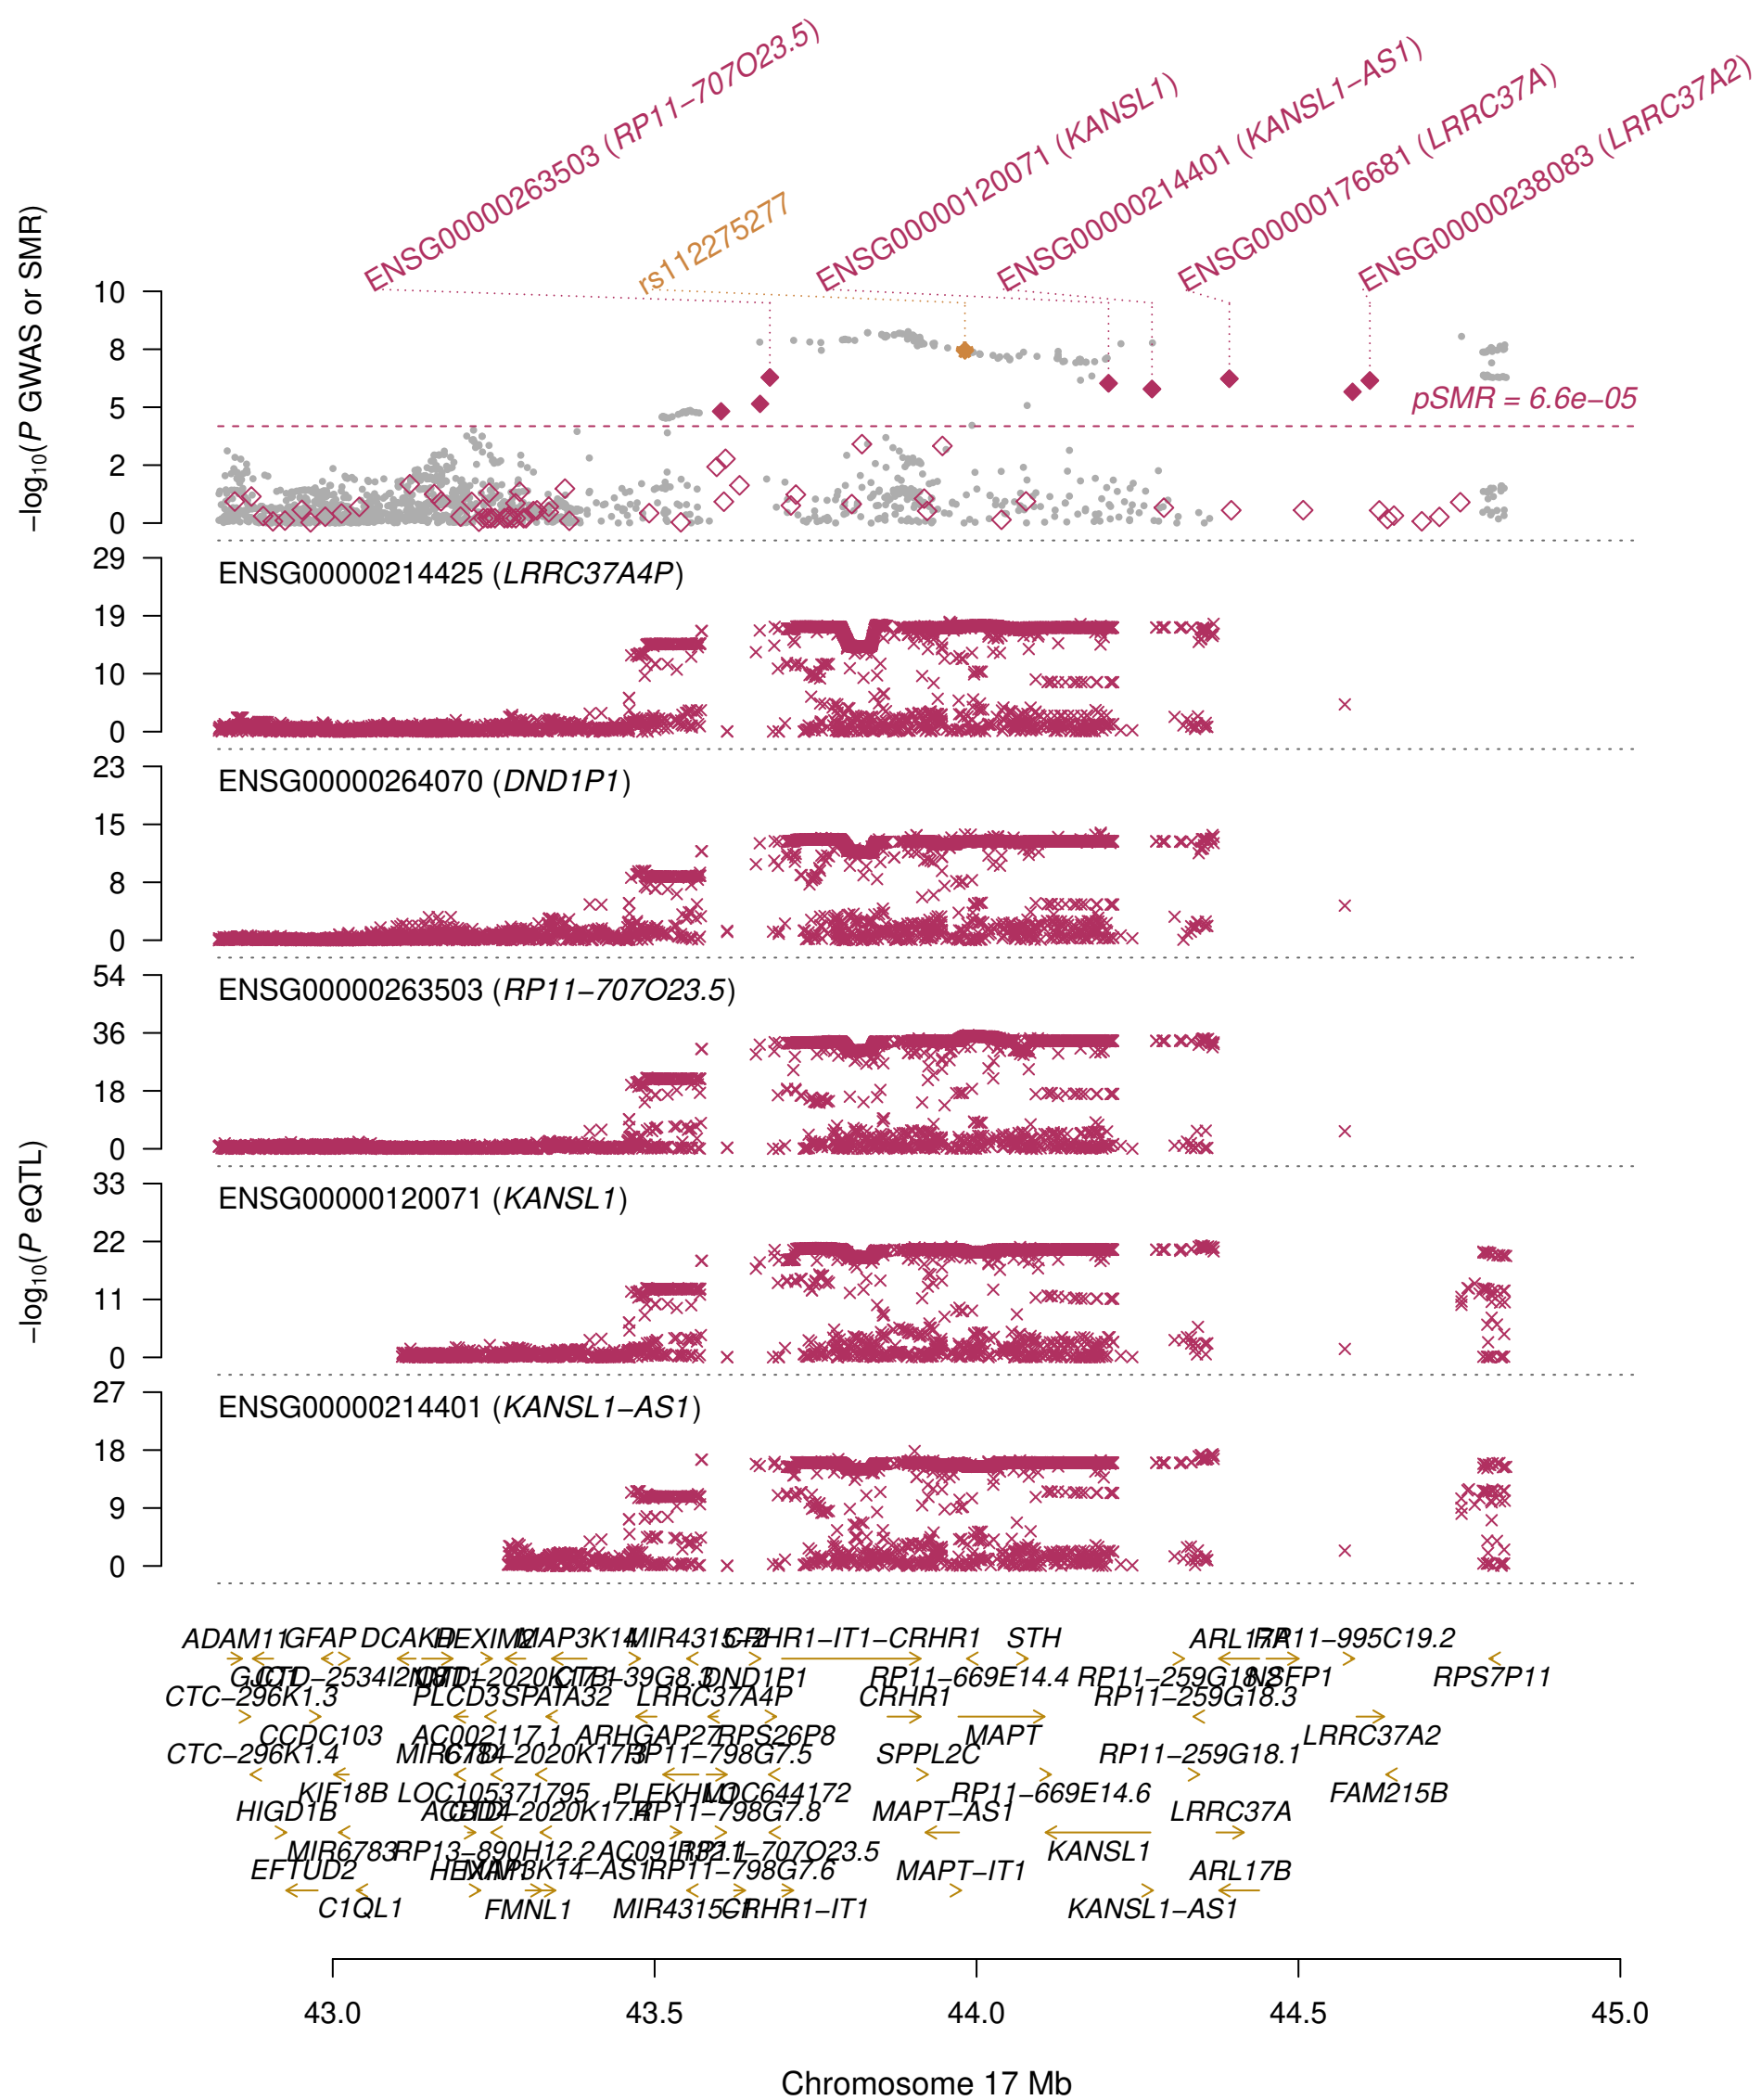



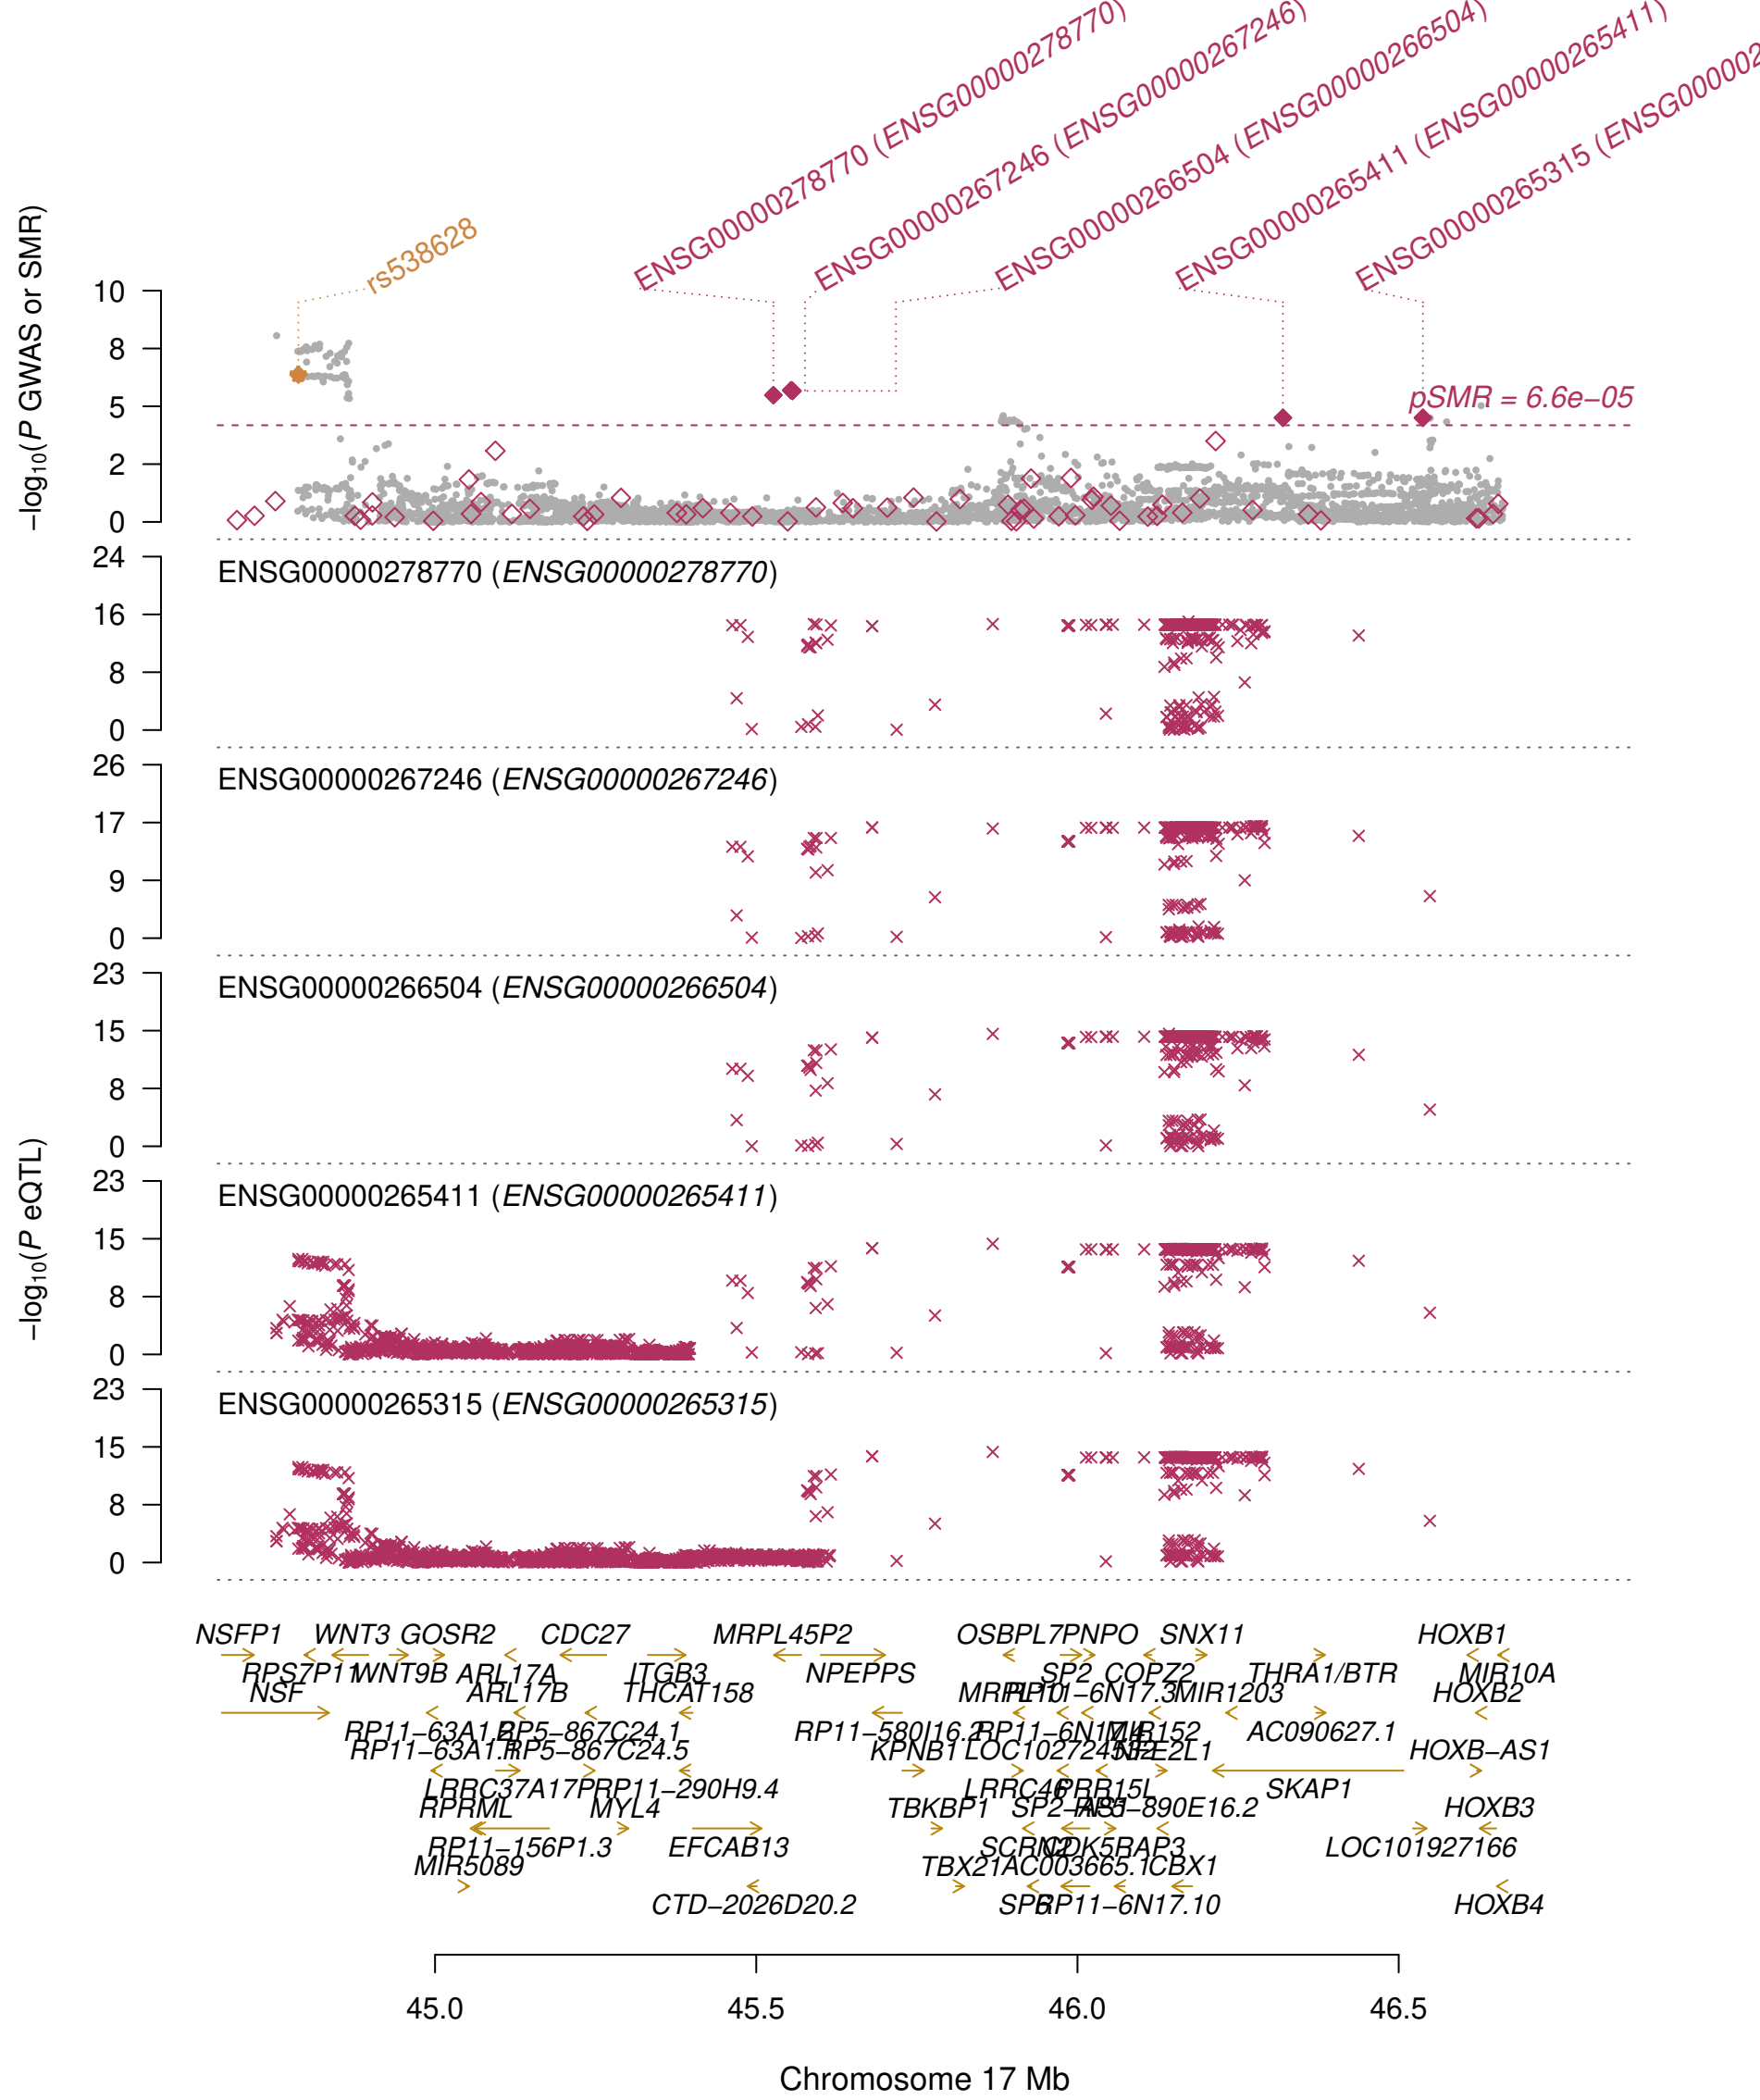

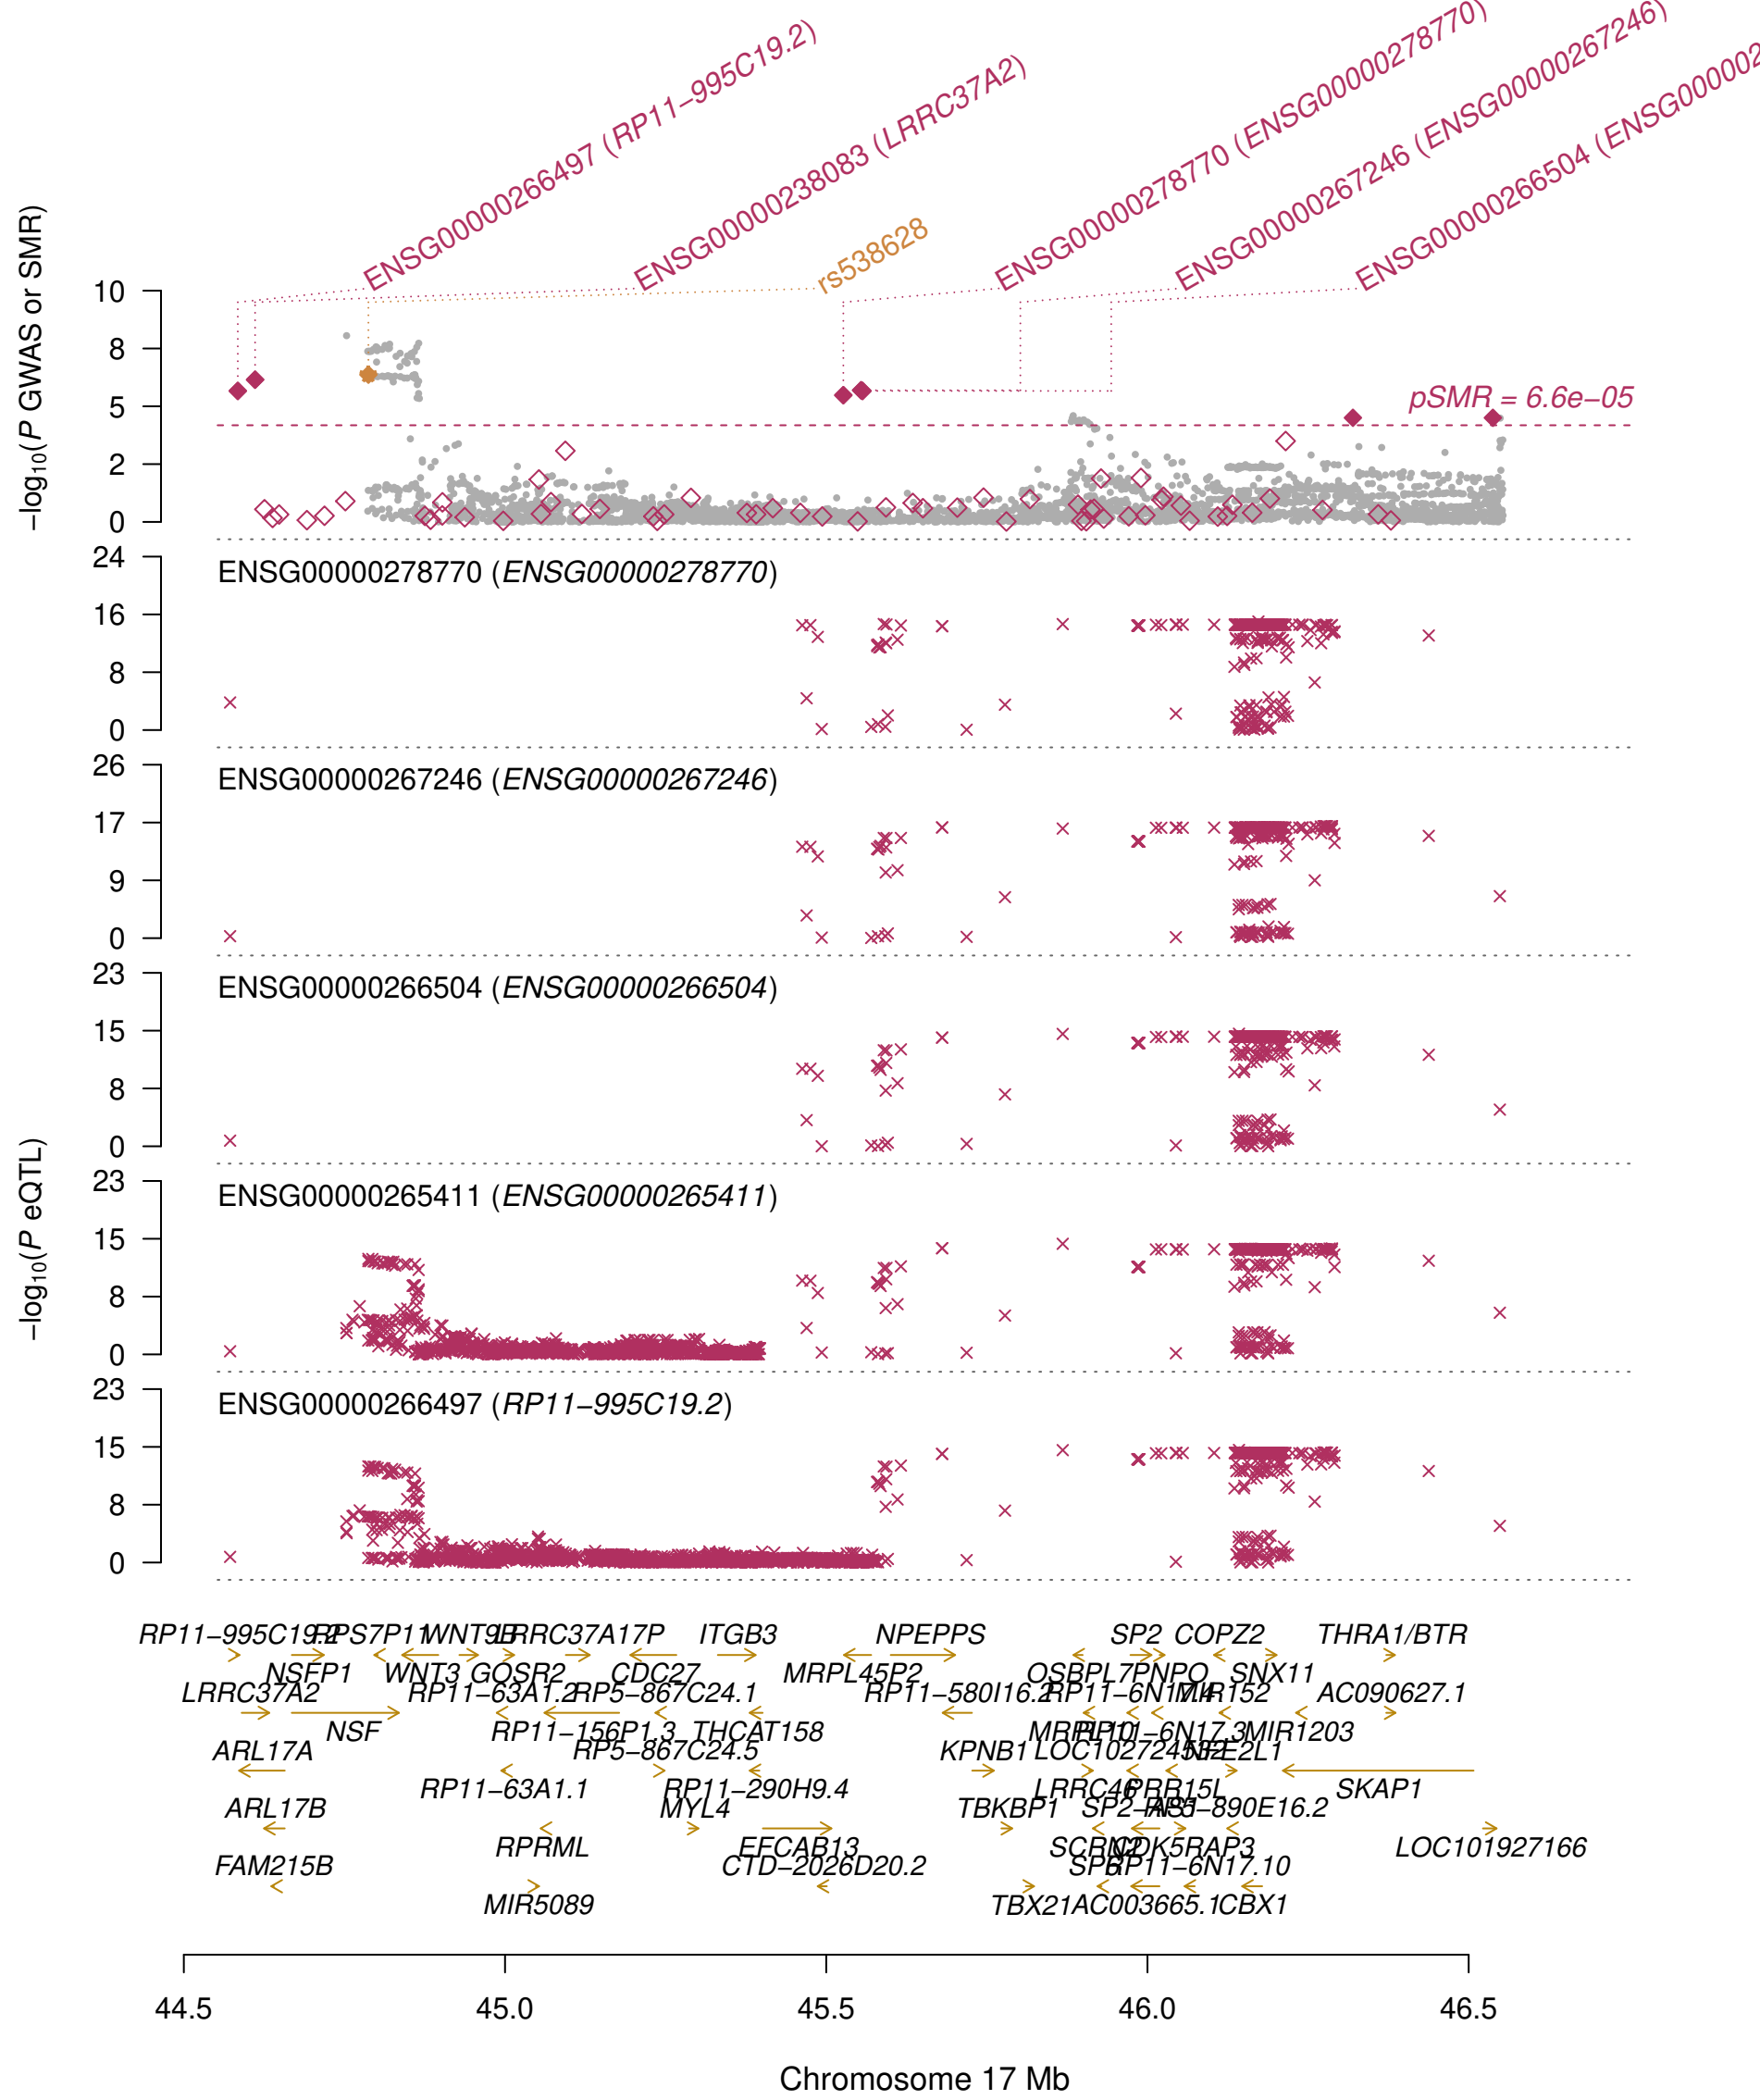

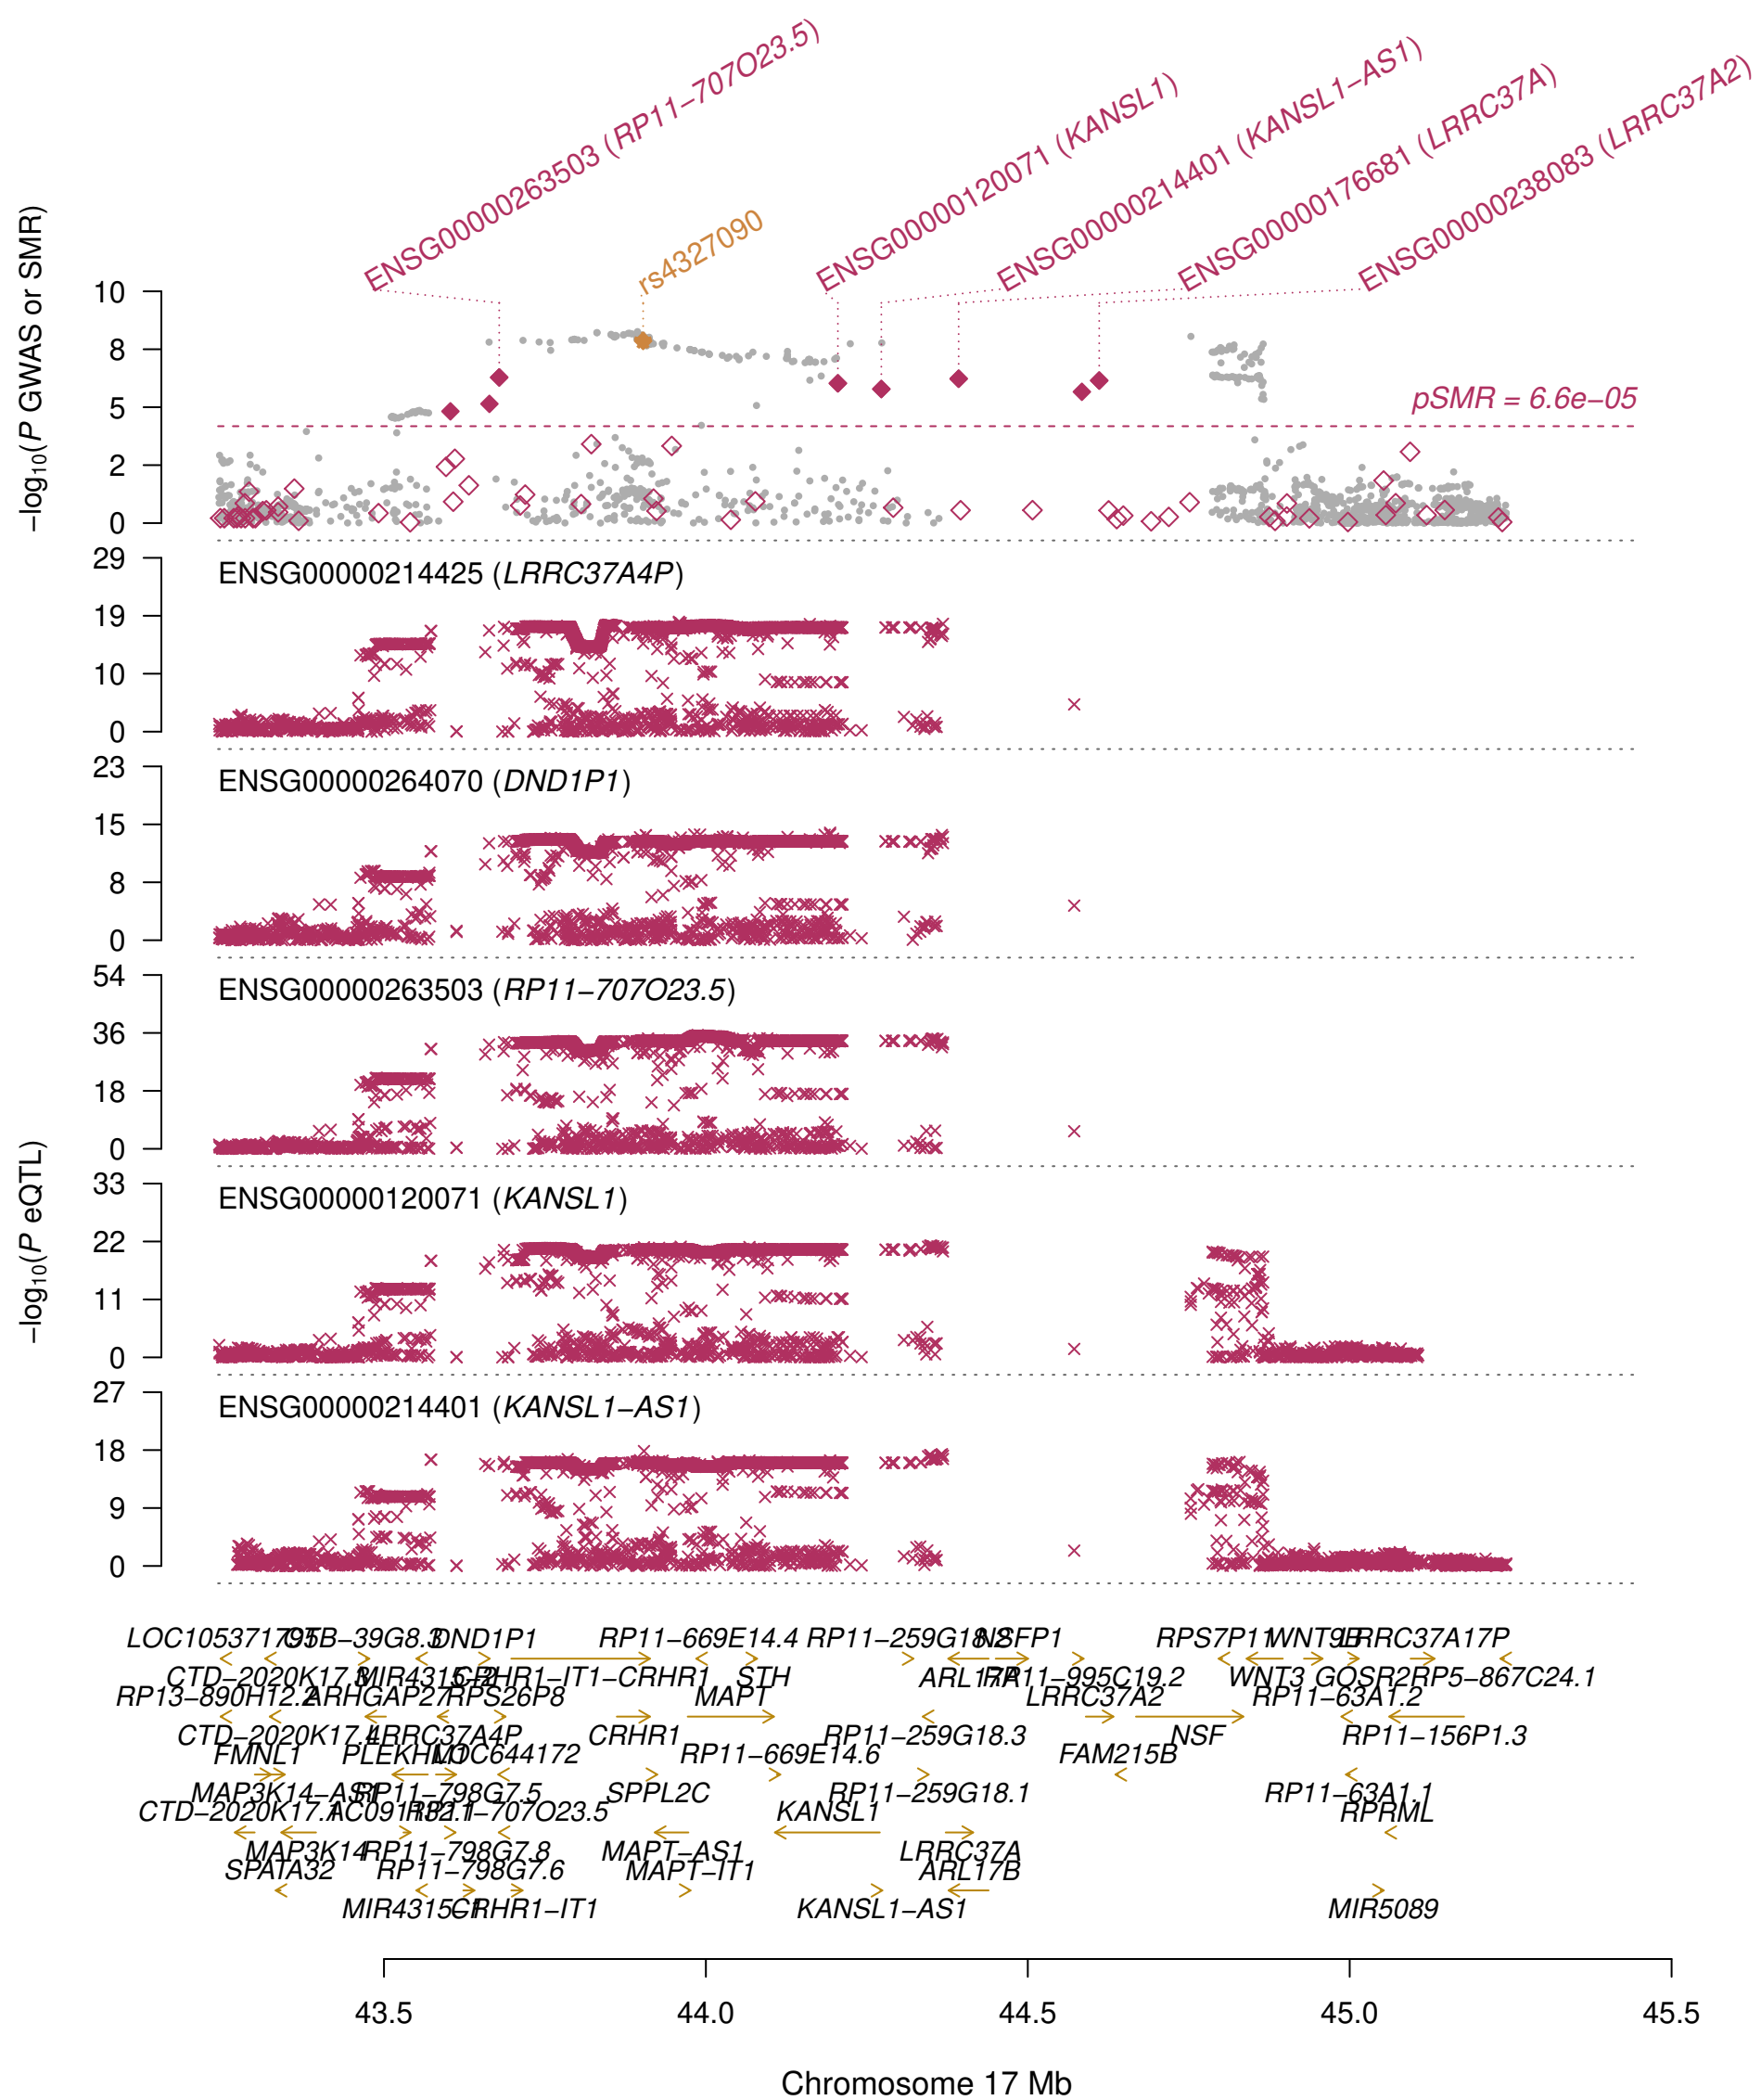

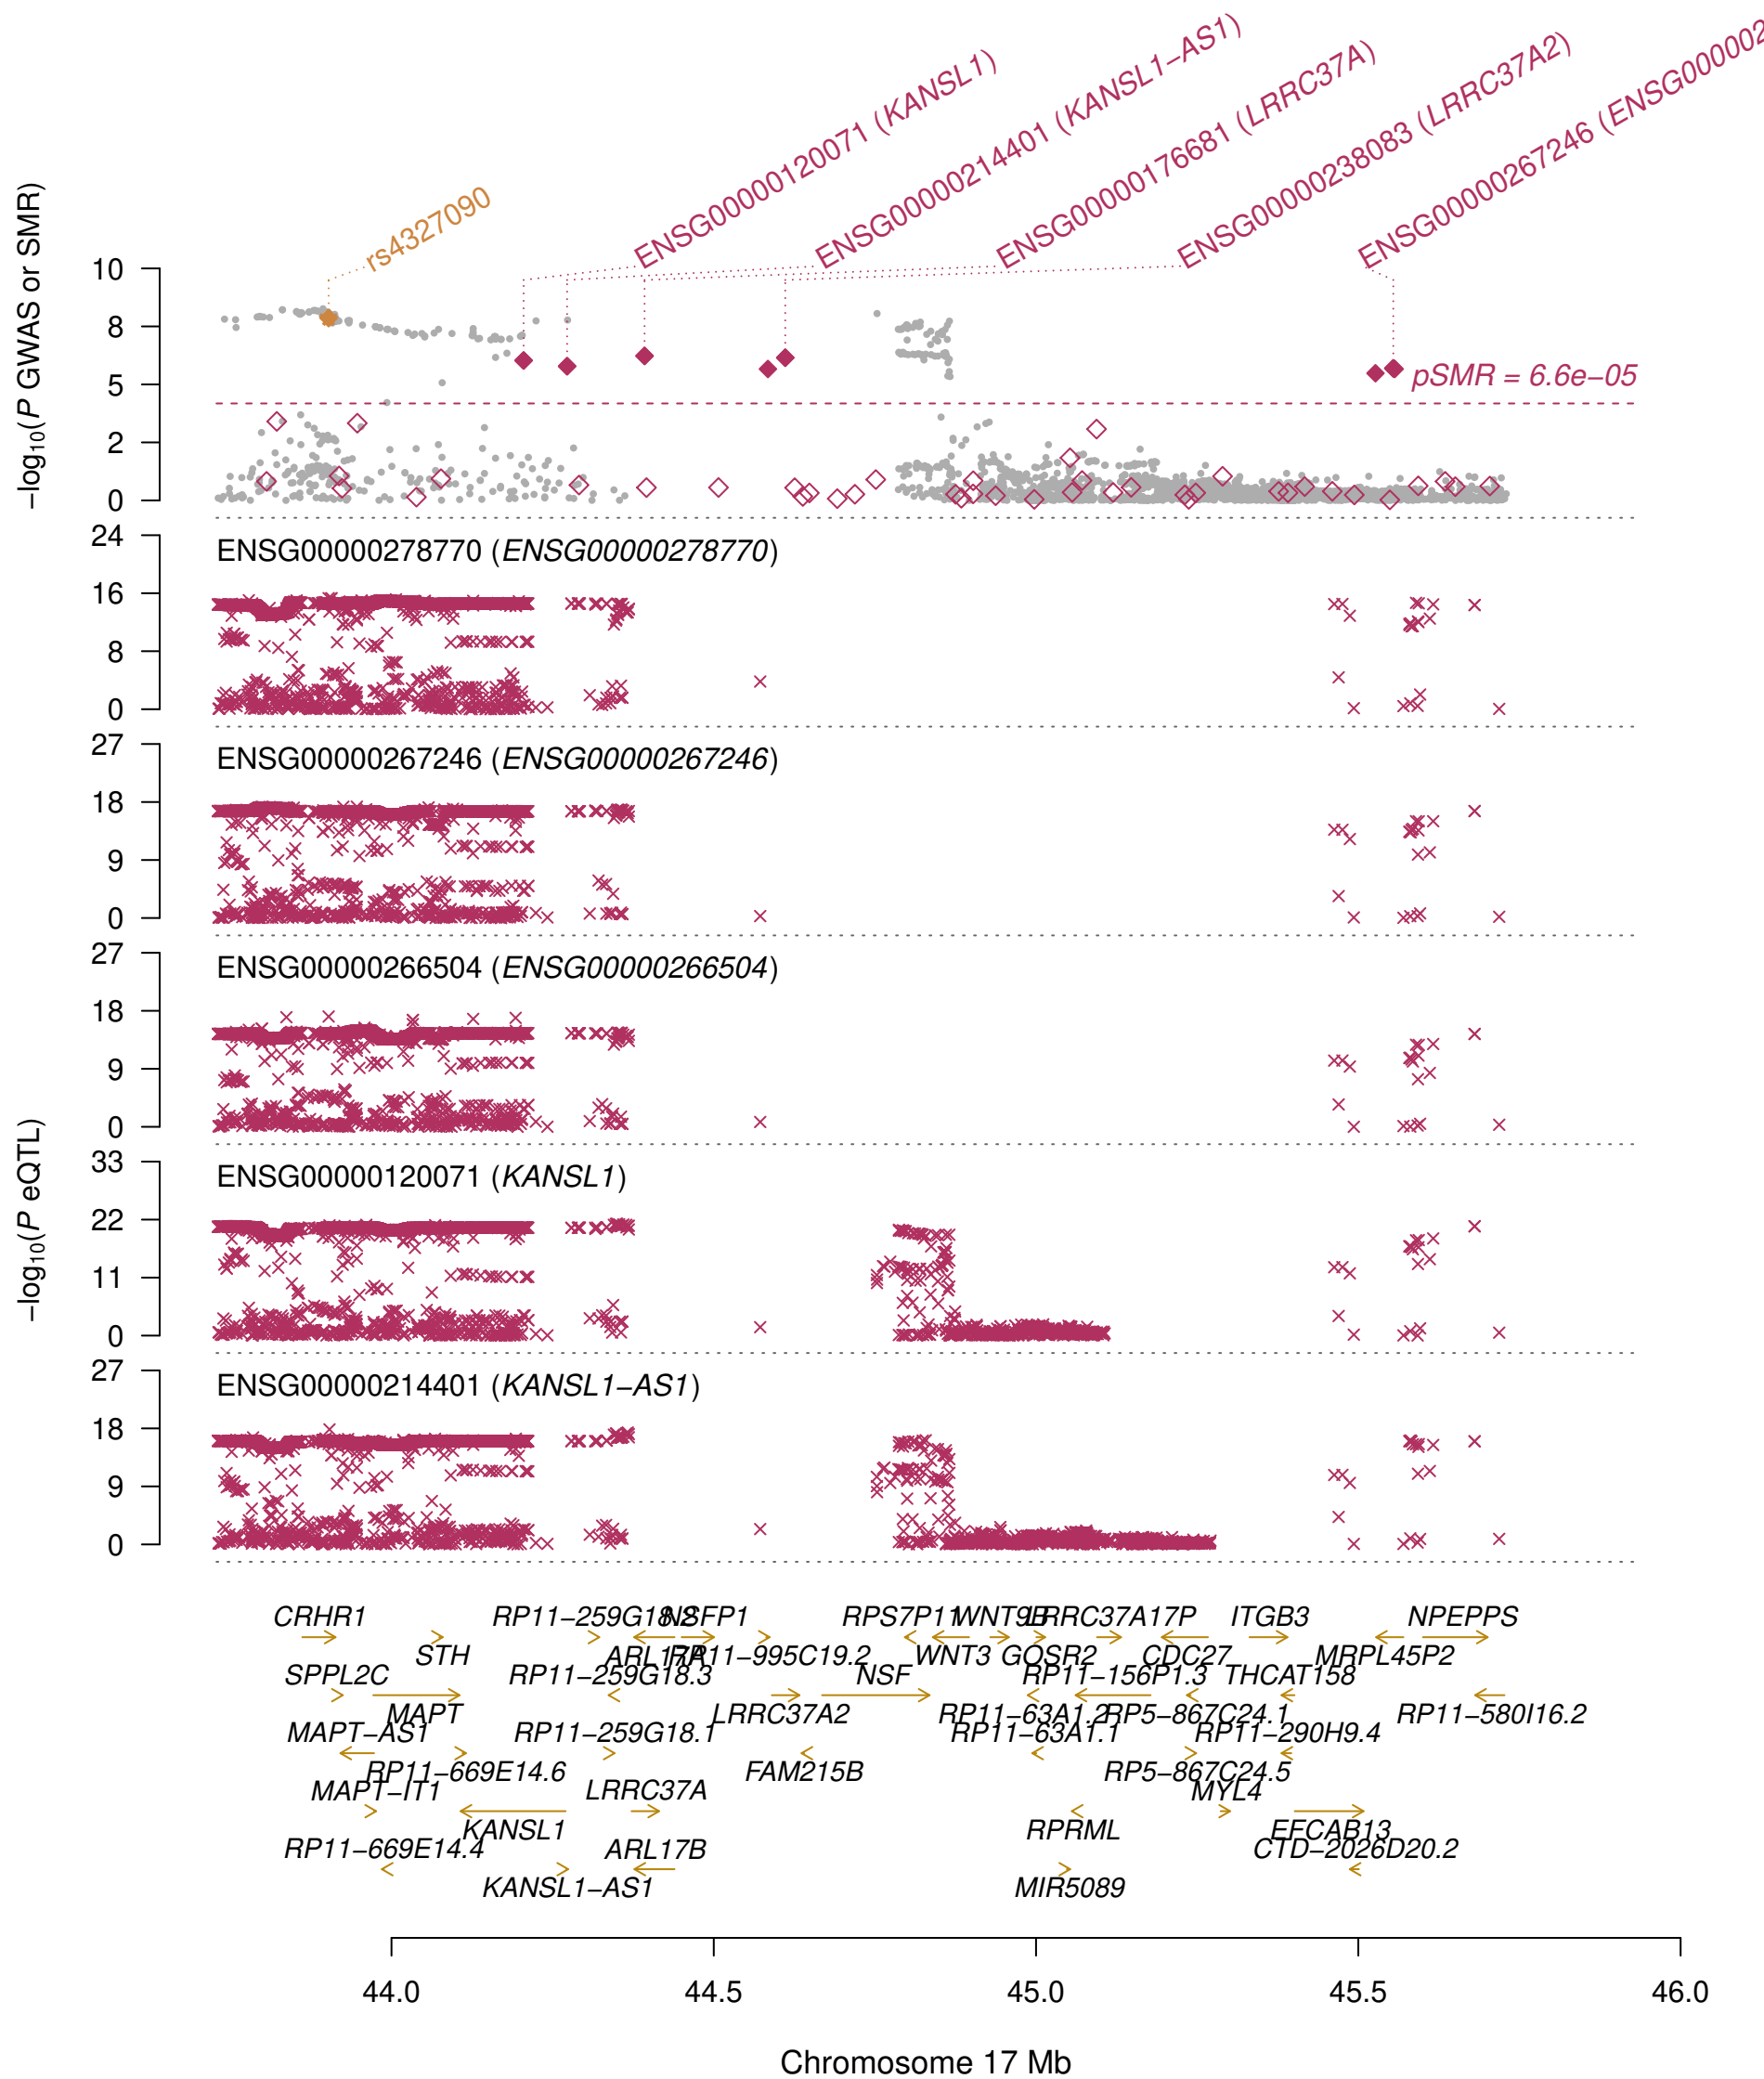

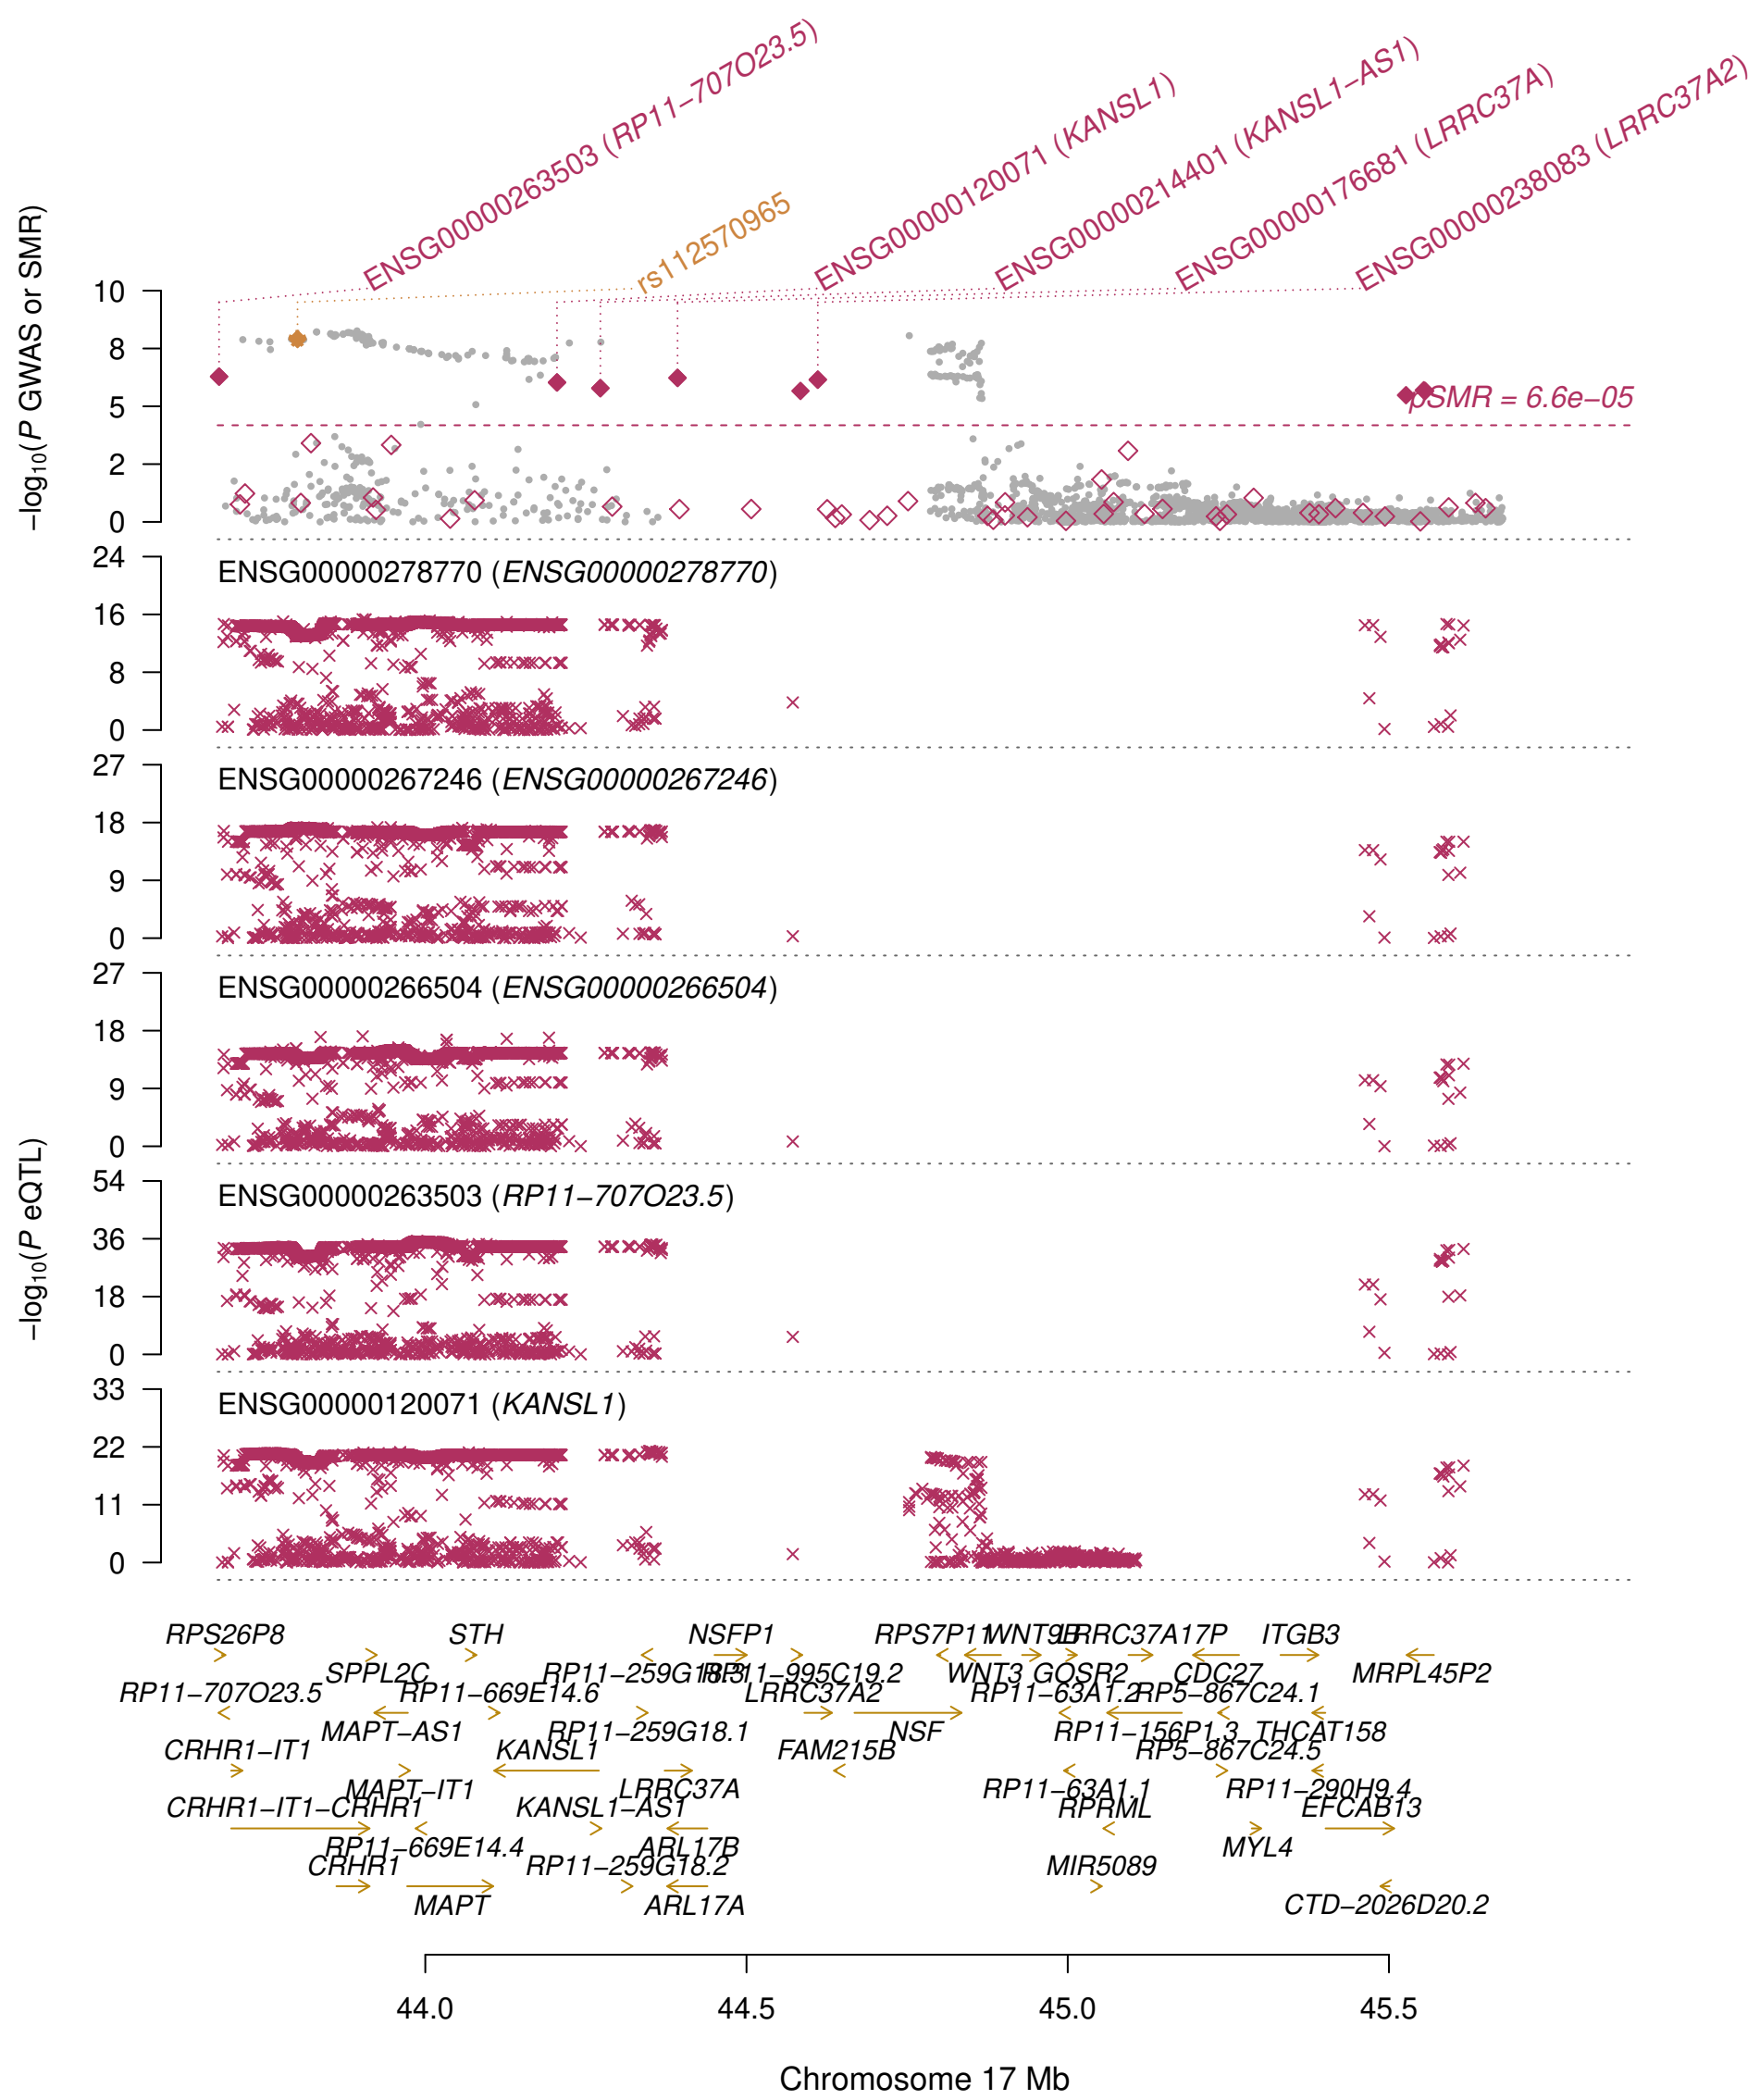

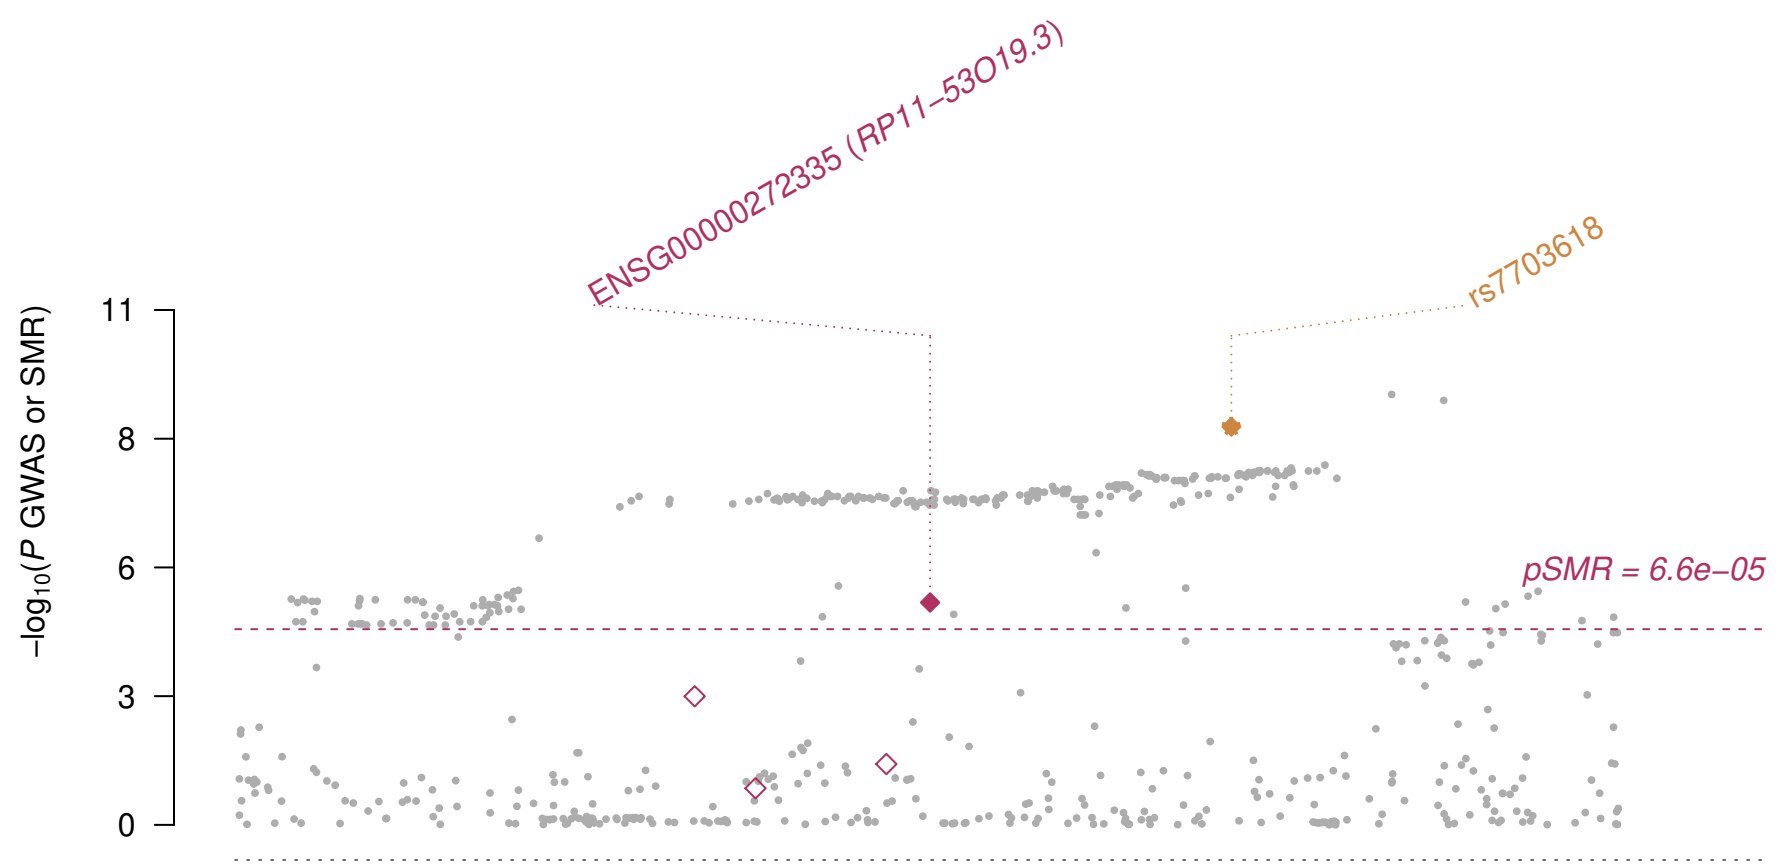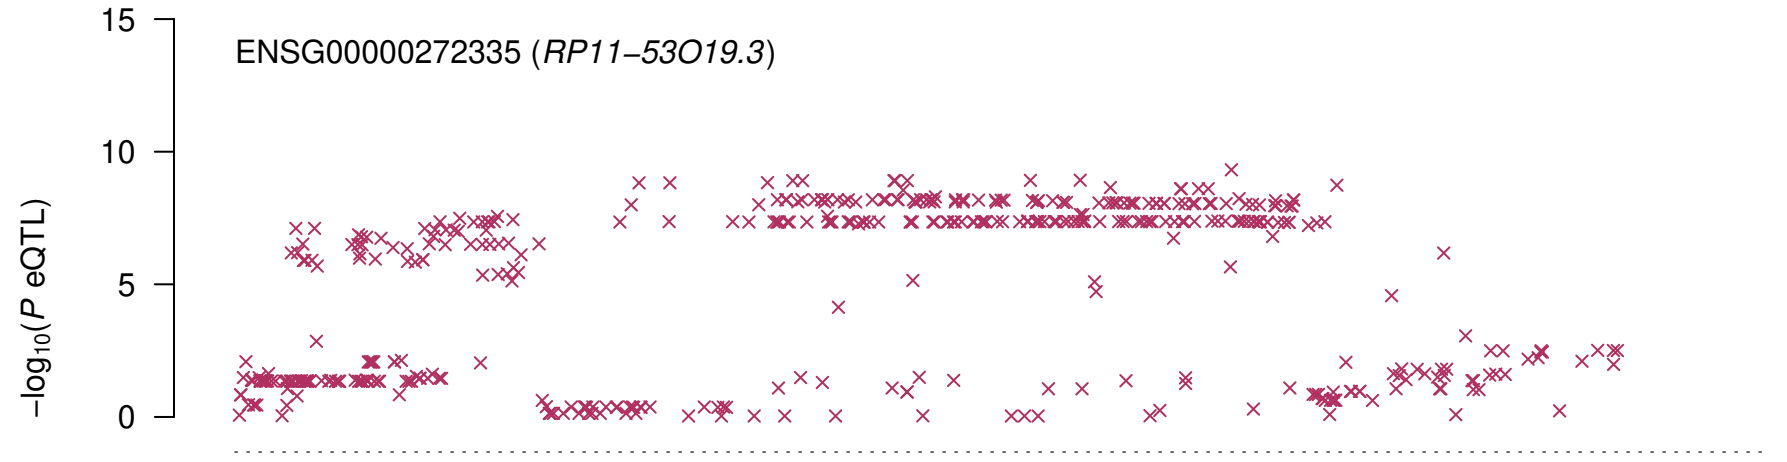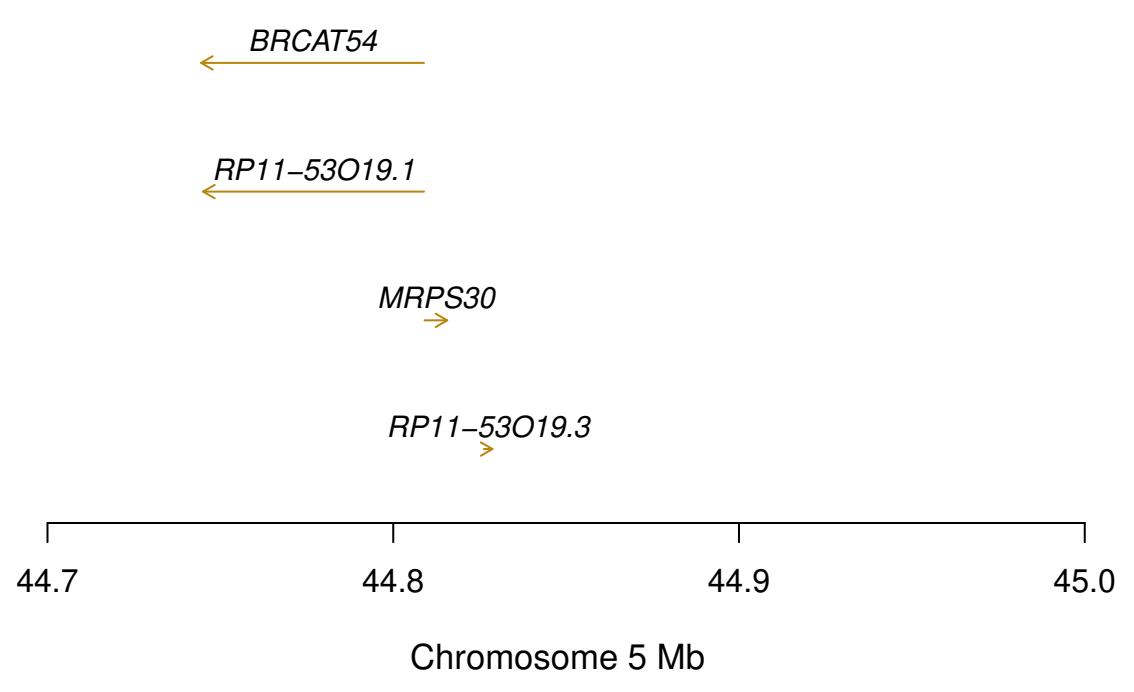

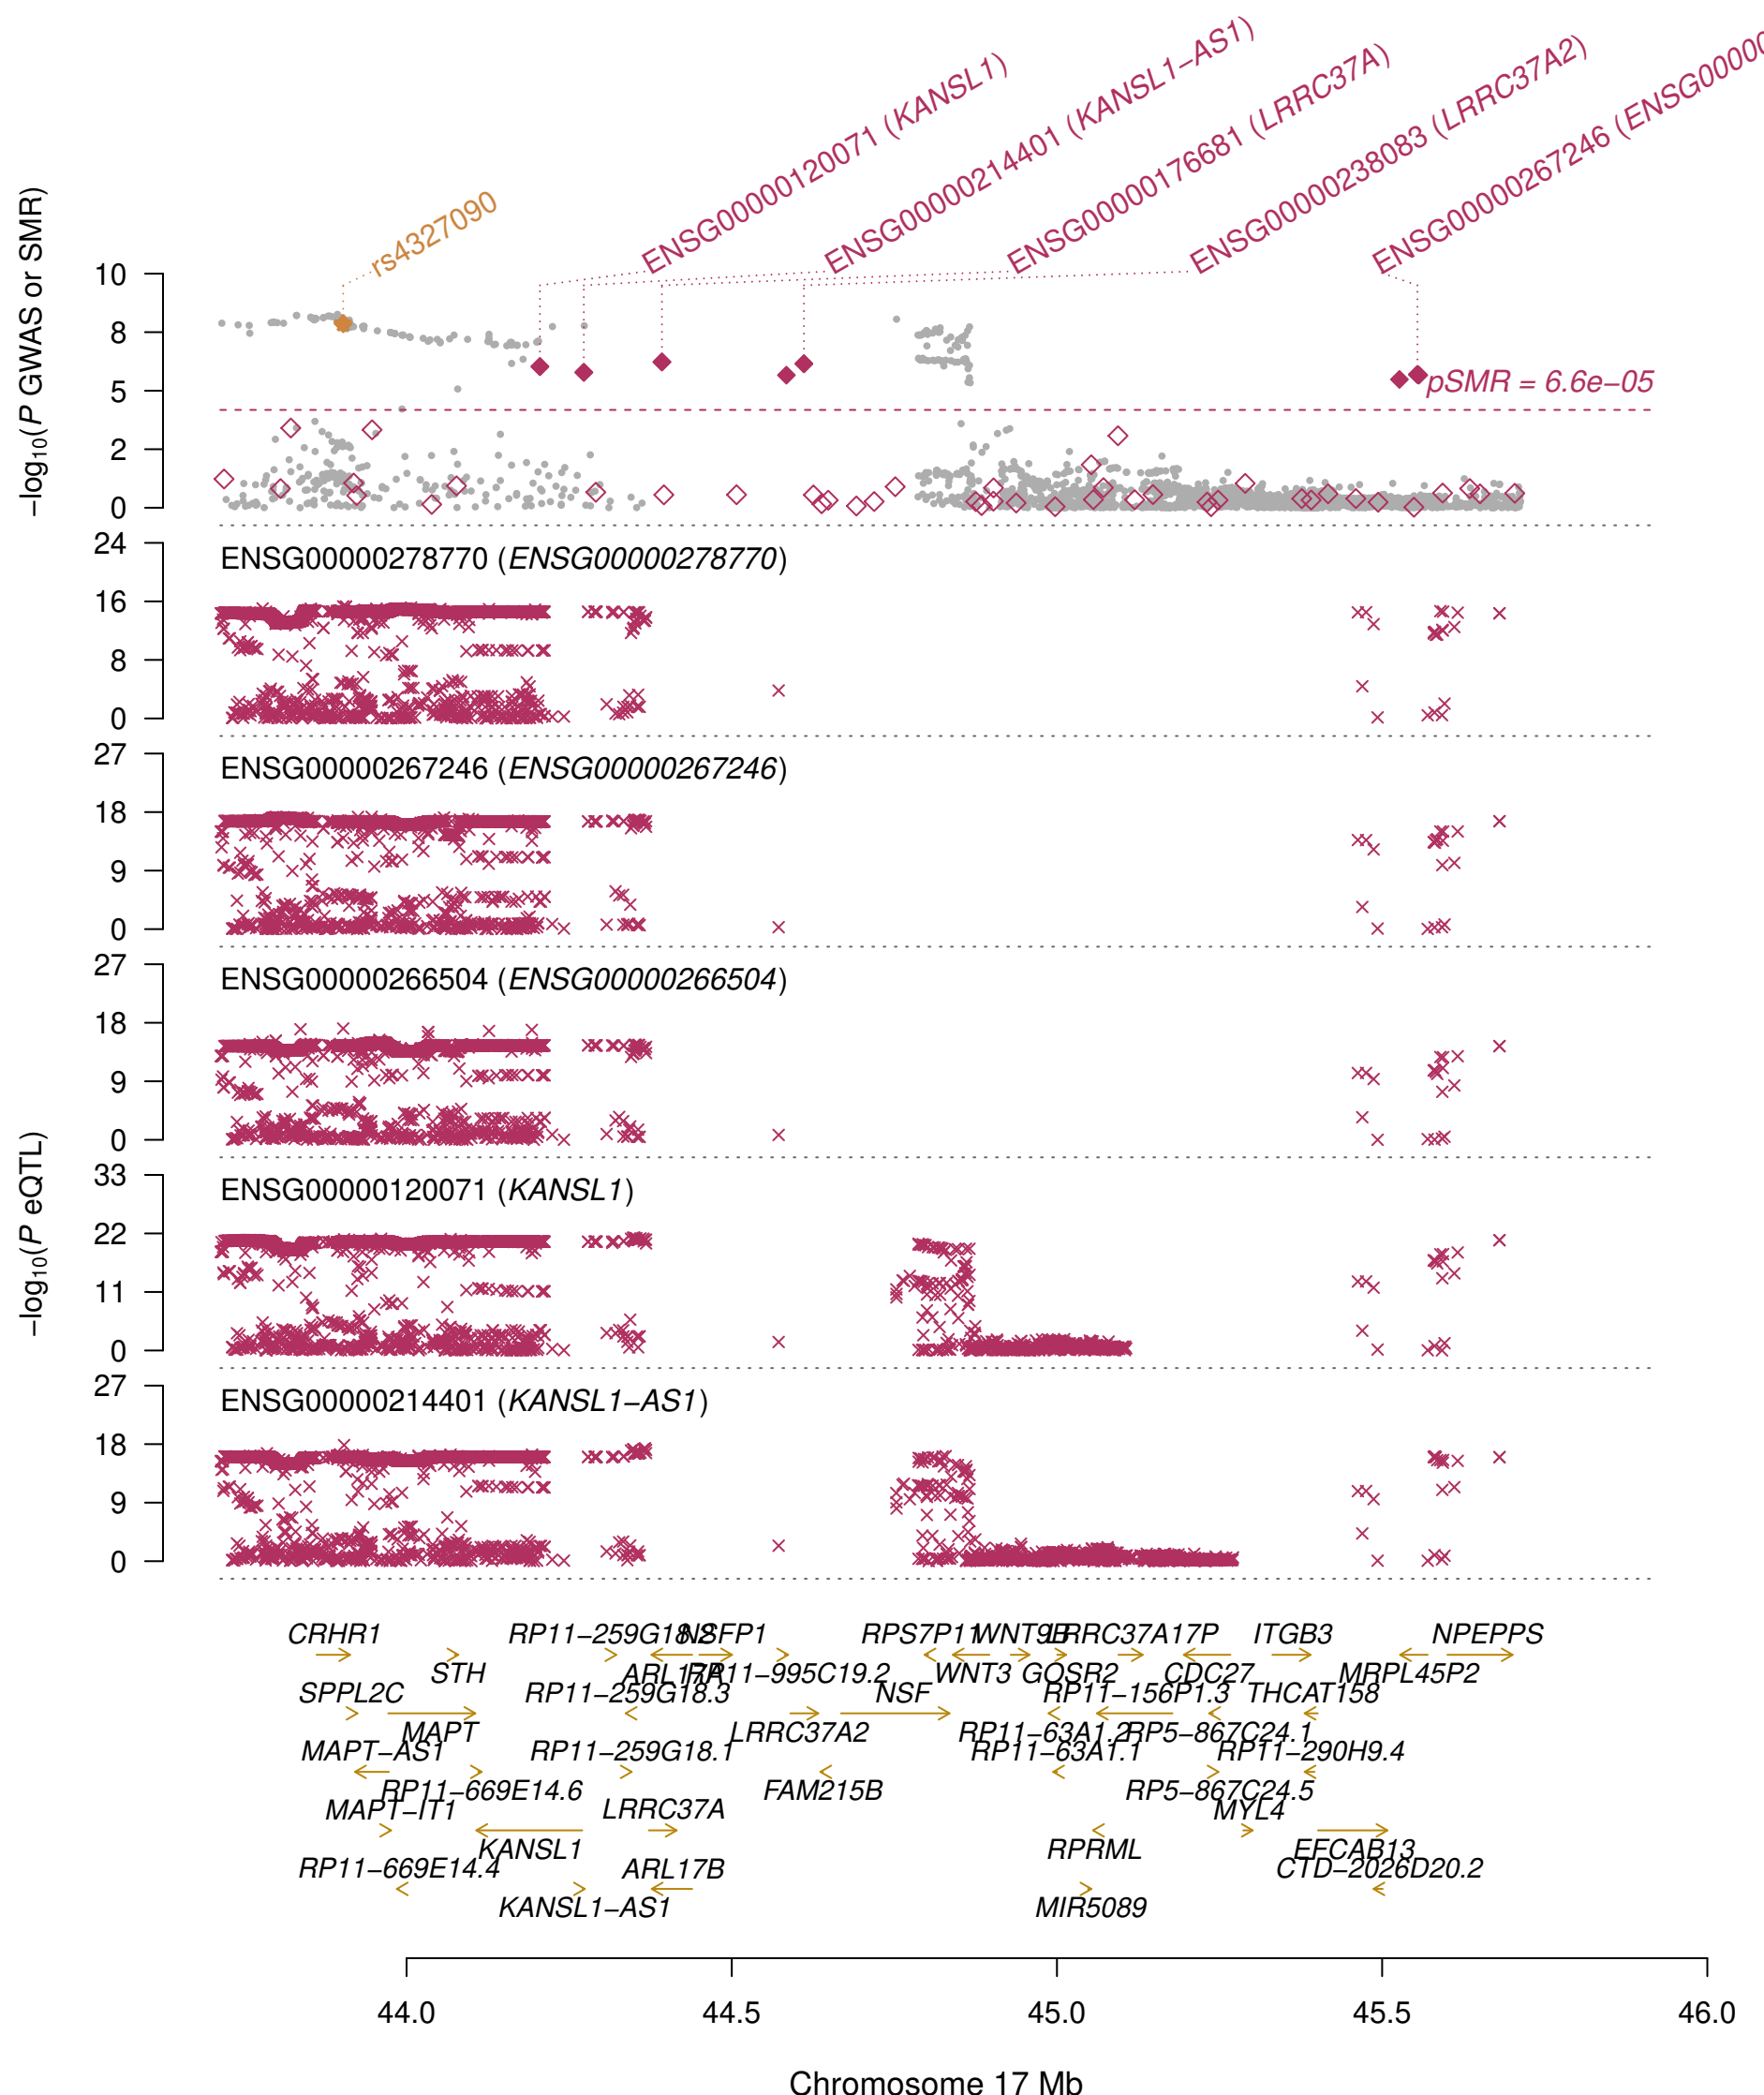

Supplement: NIHMS1824605-supplement-Fig_S10a.pdf [file NIHMS1824605-supplement-Fig_S10a.pdf]
