# Supplementary material
Source: PubMed Central journal article supplement (PMC9392466)

# PGC\_SCZ\_w3\_90\_0418b.1.chr6

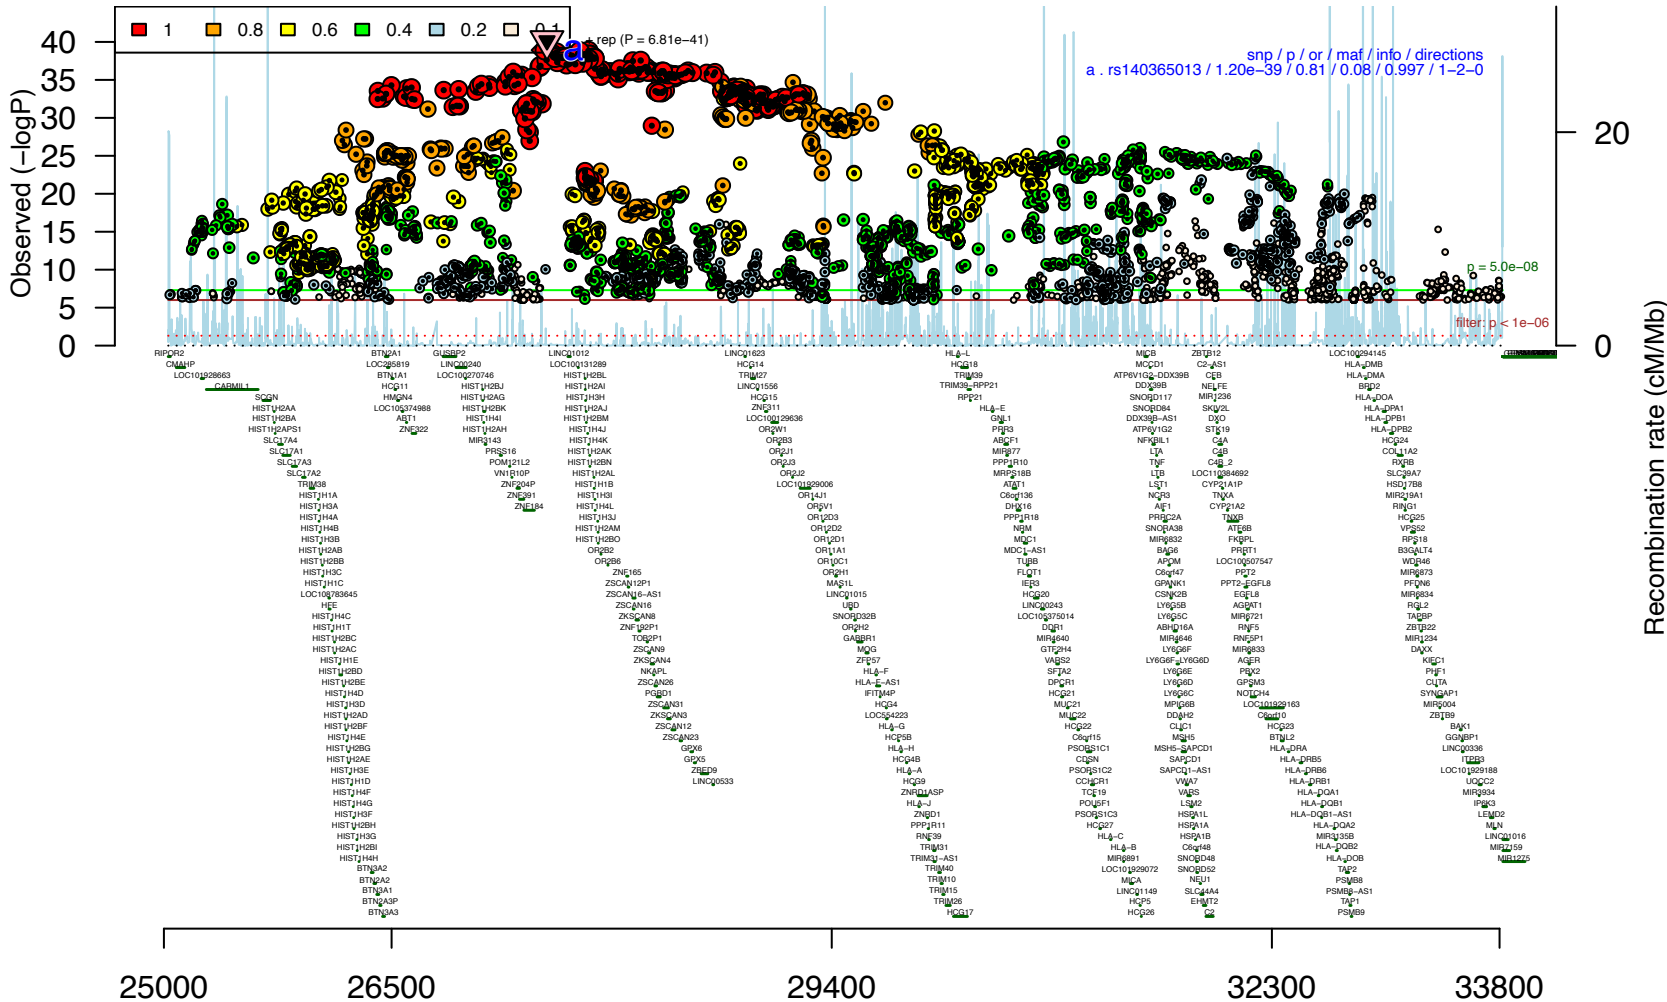

# PGC\_SCZ\_w3\_90\_0418b.2.chr7

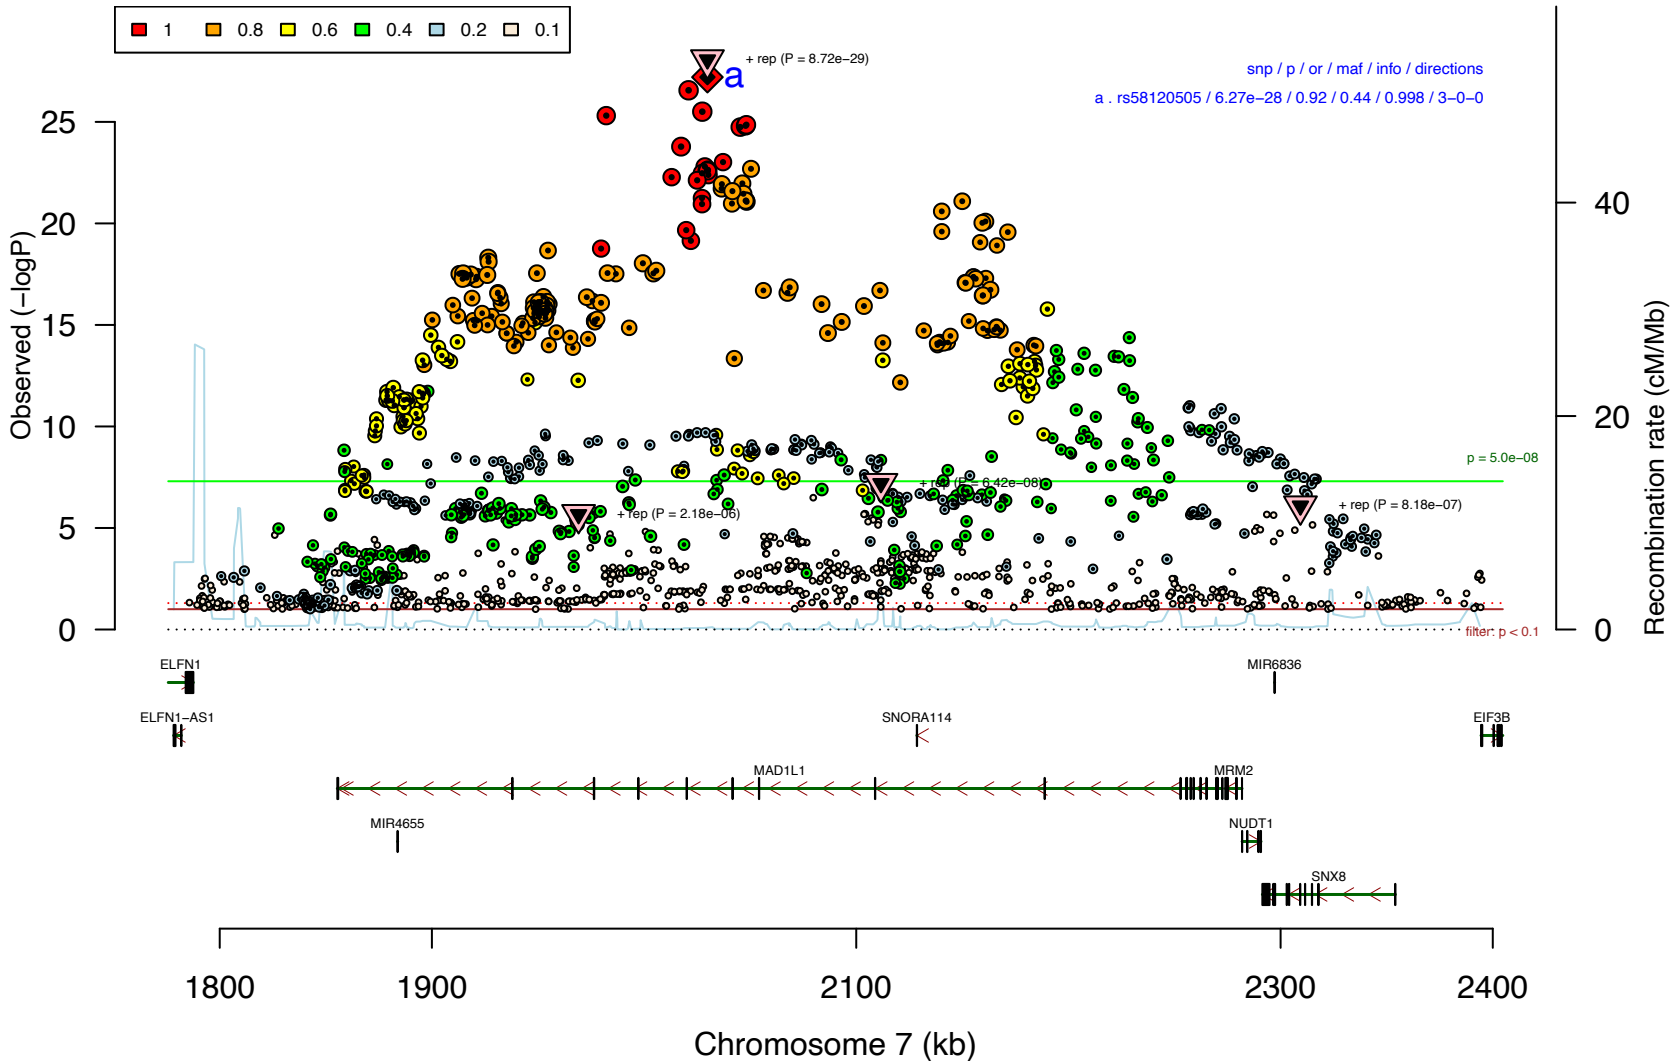

# PGC\_SCZ\_w3\_90\_0418b.3.chr10

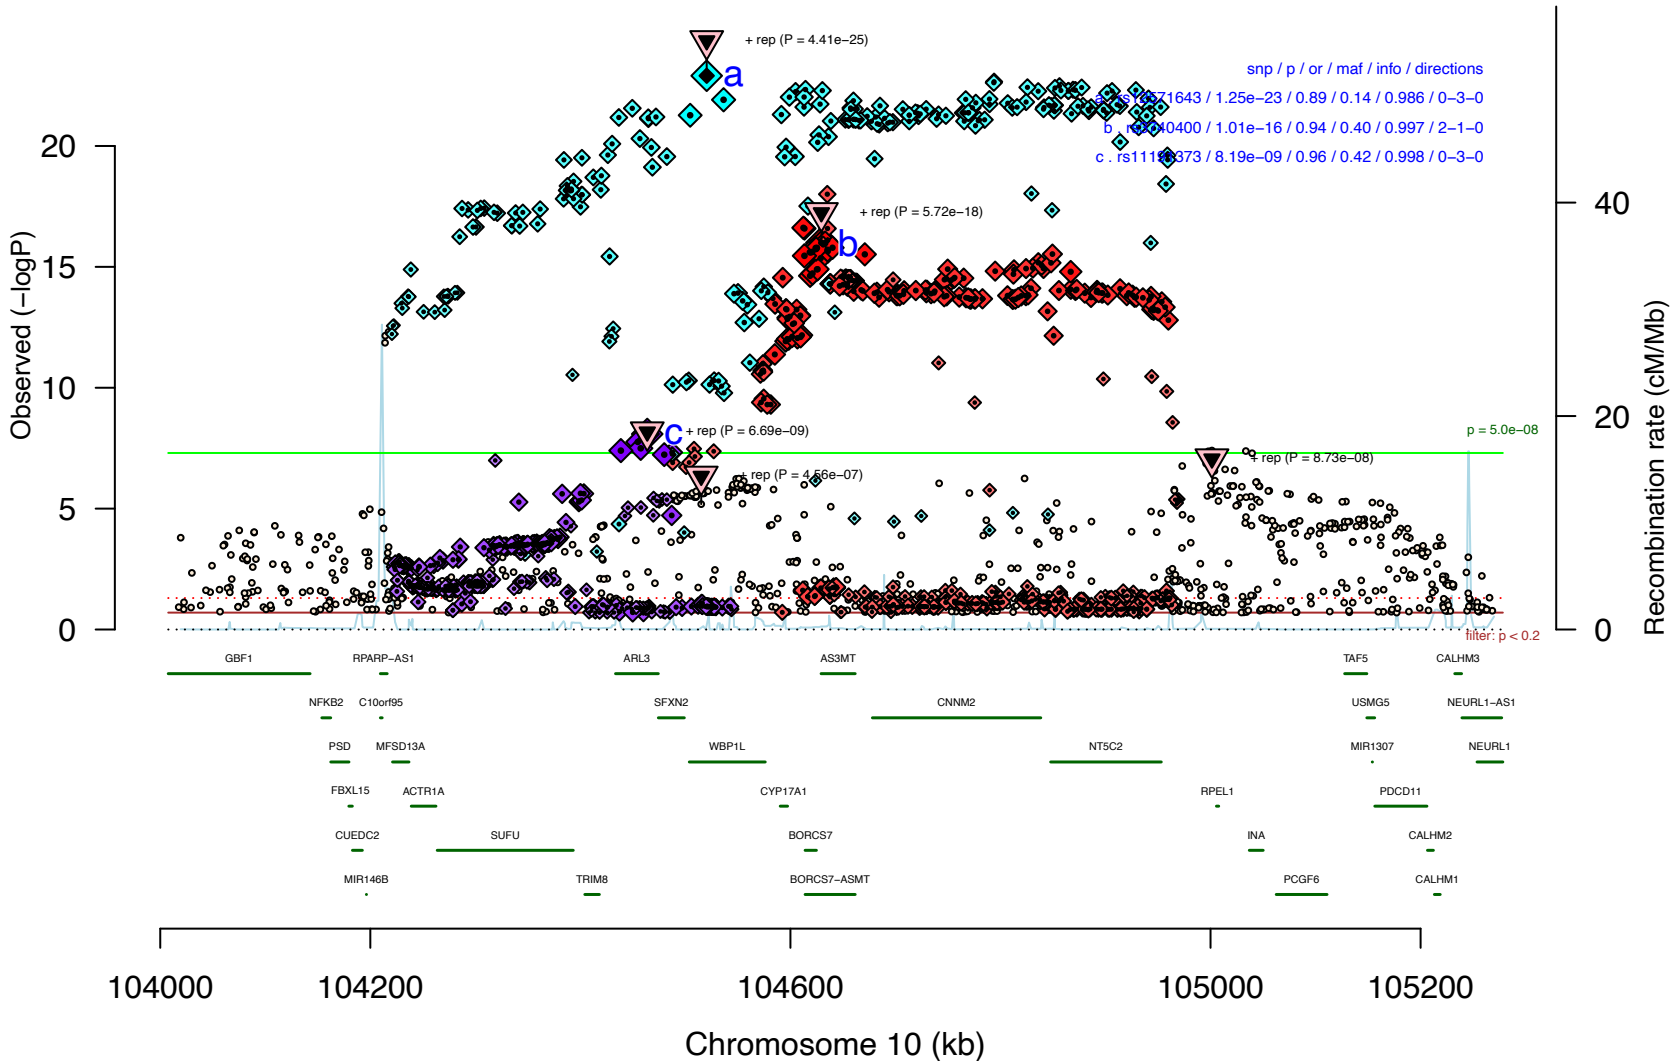

# PGC\_SCZ\_w3\_90\_0418b.4.chr15

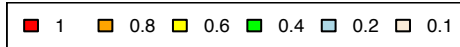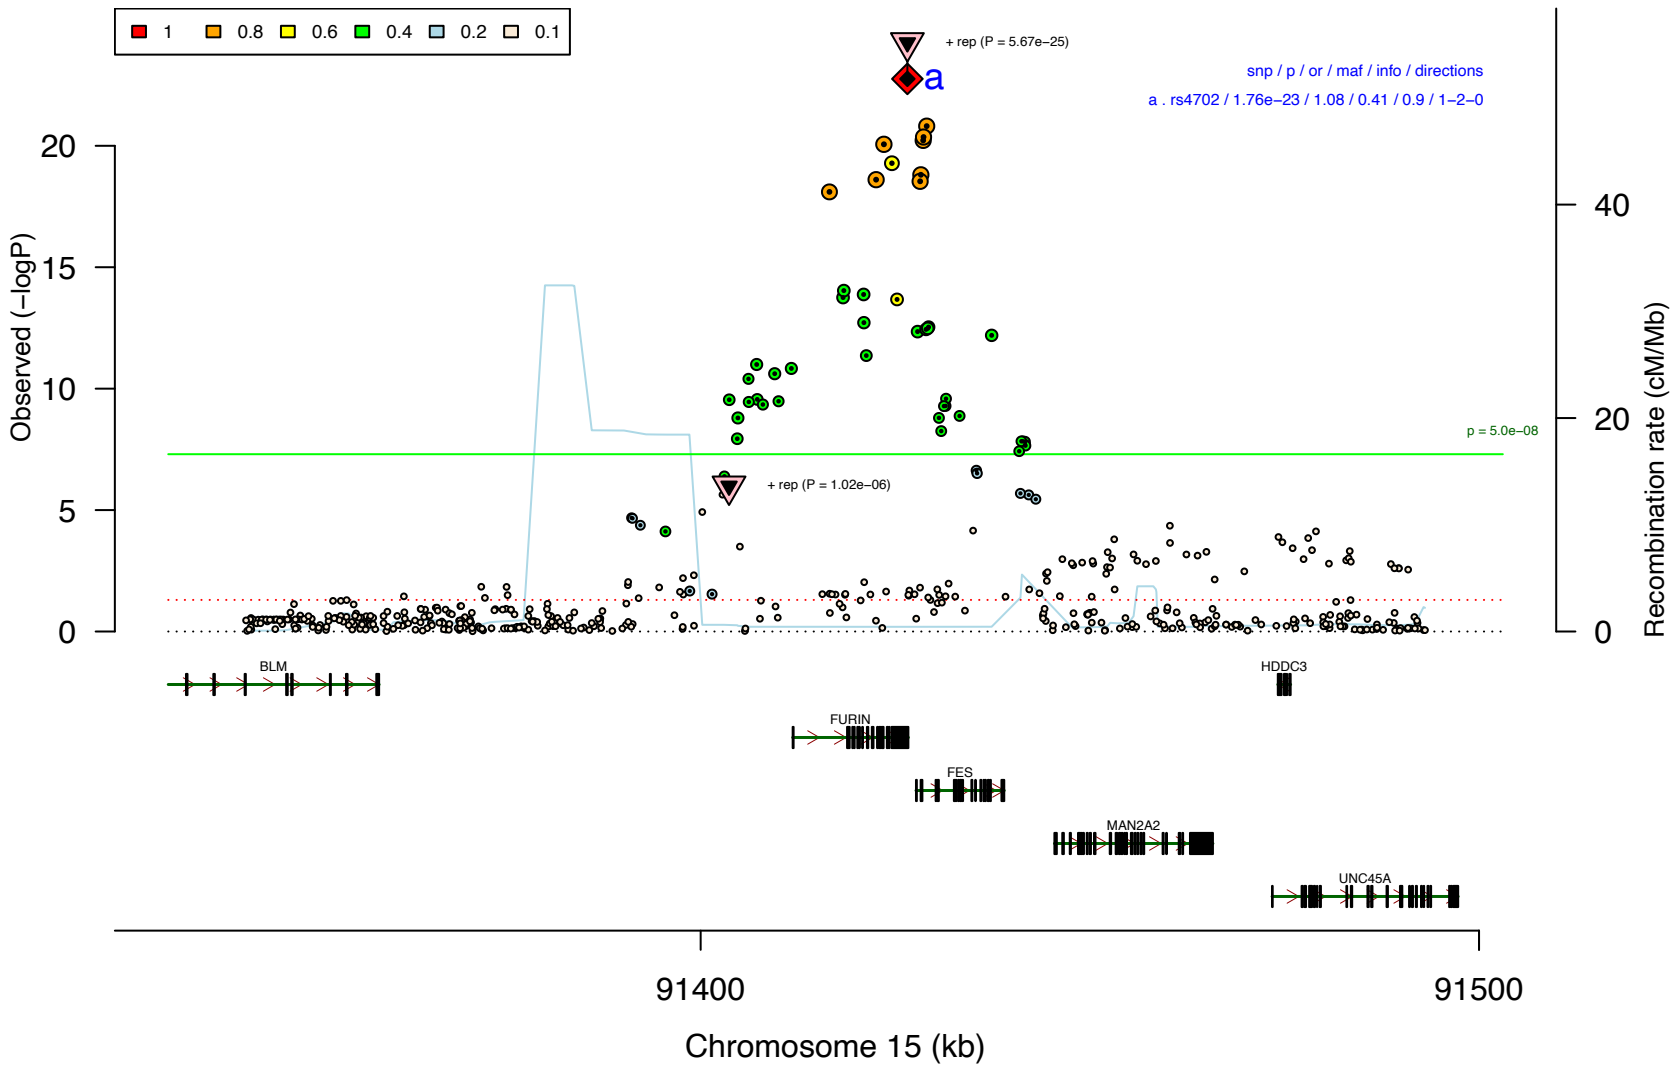



# PGC\_SCZ\_w3\_90\_0418b.5.chr12

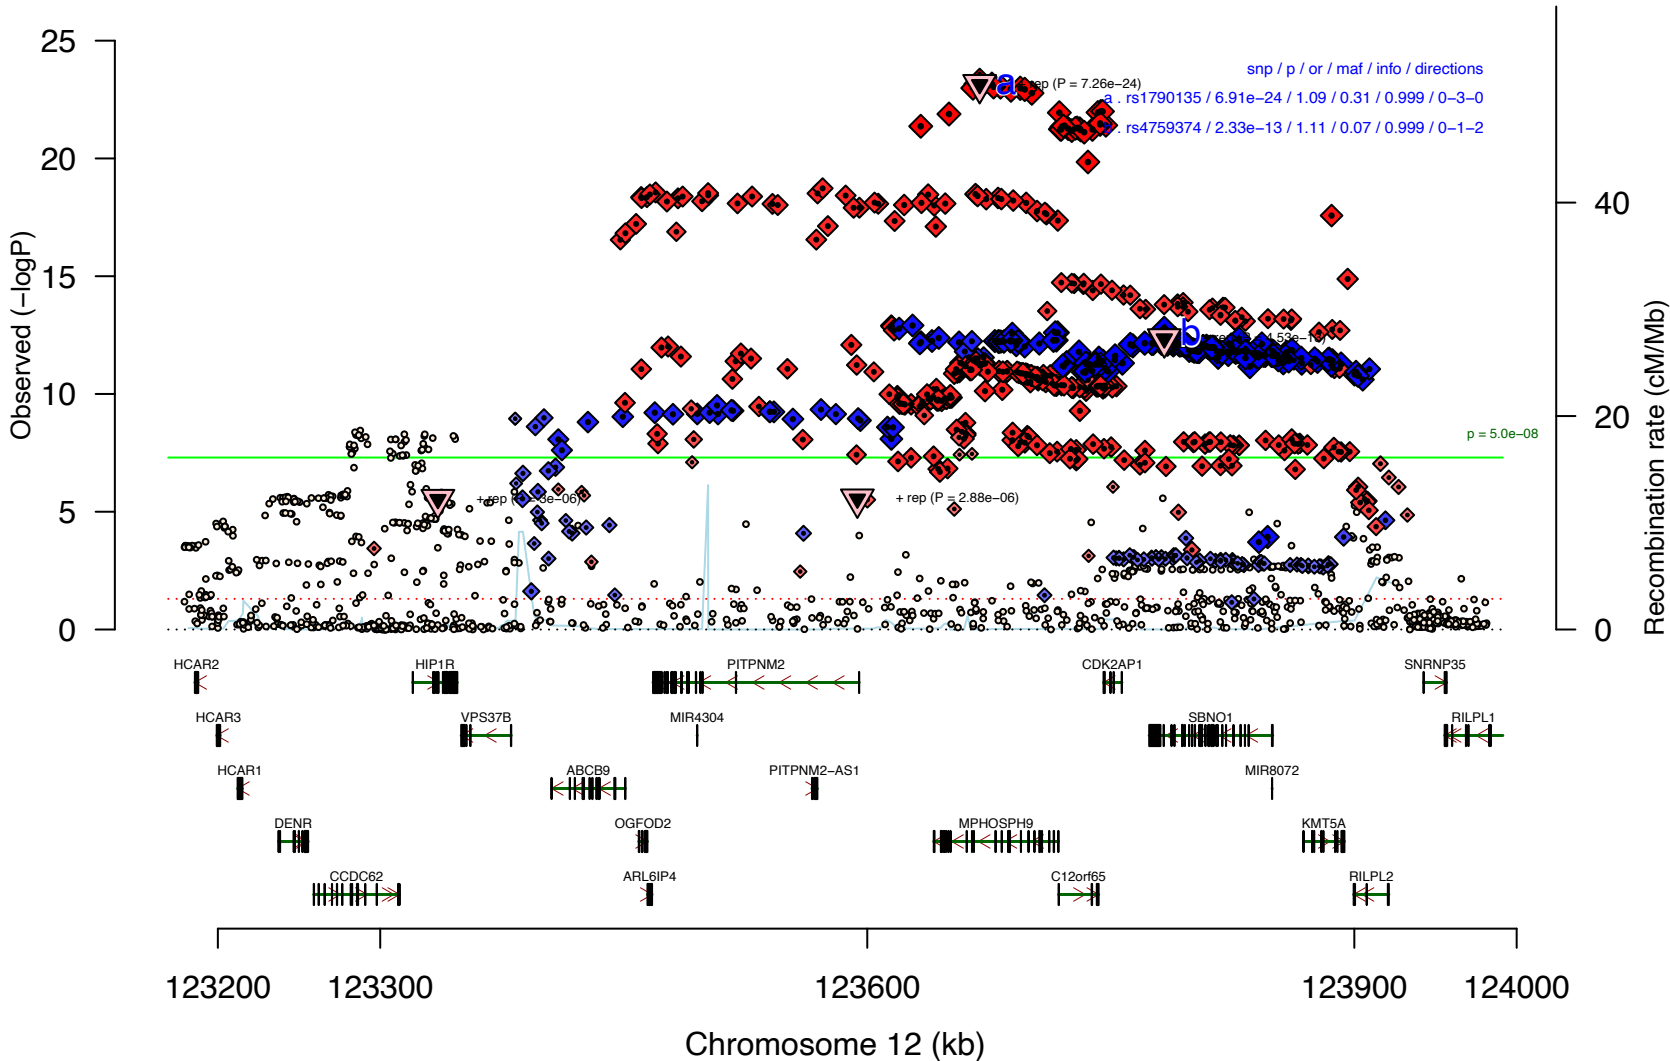

# PGC\_SCZ\_w3\_90\_0418b.6.chr4

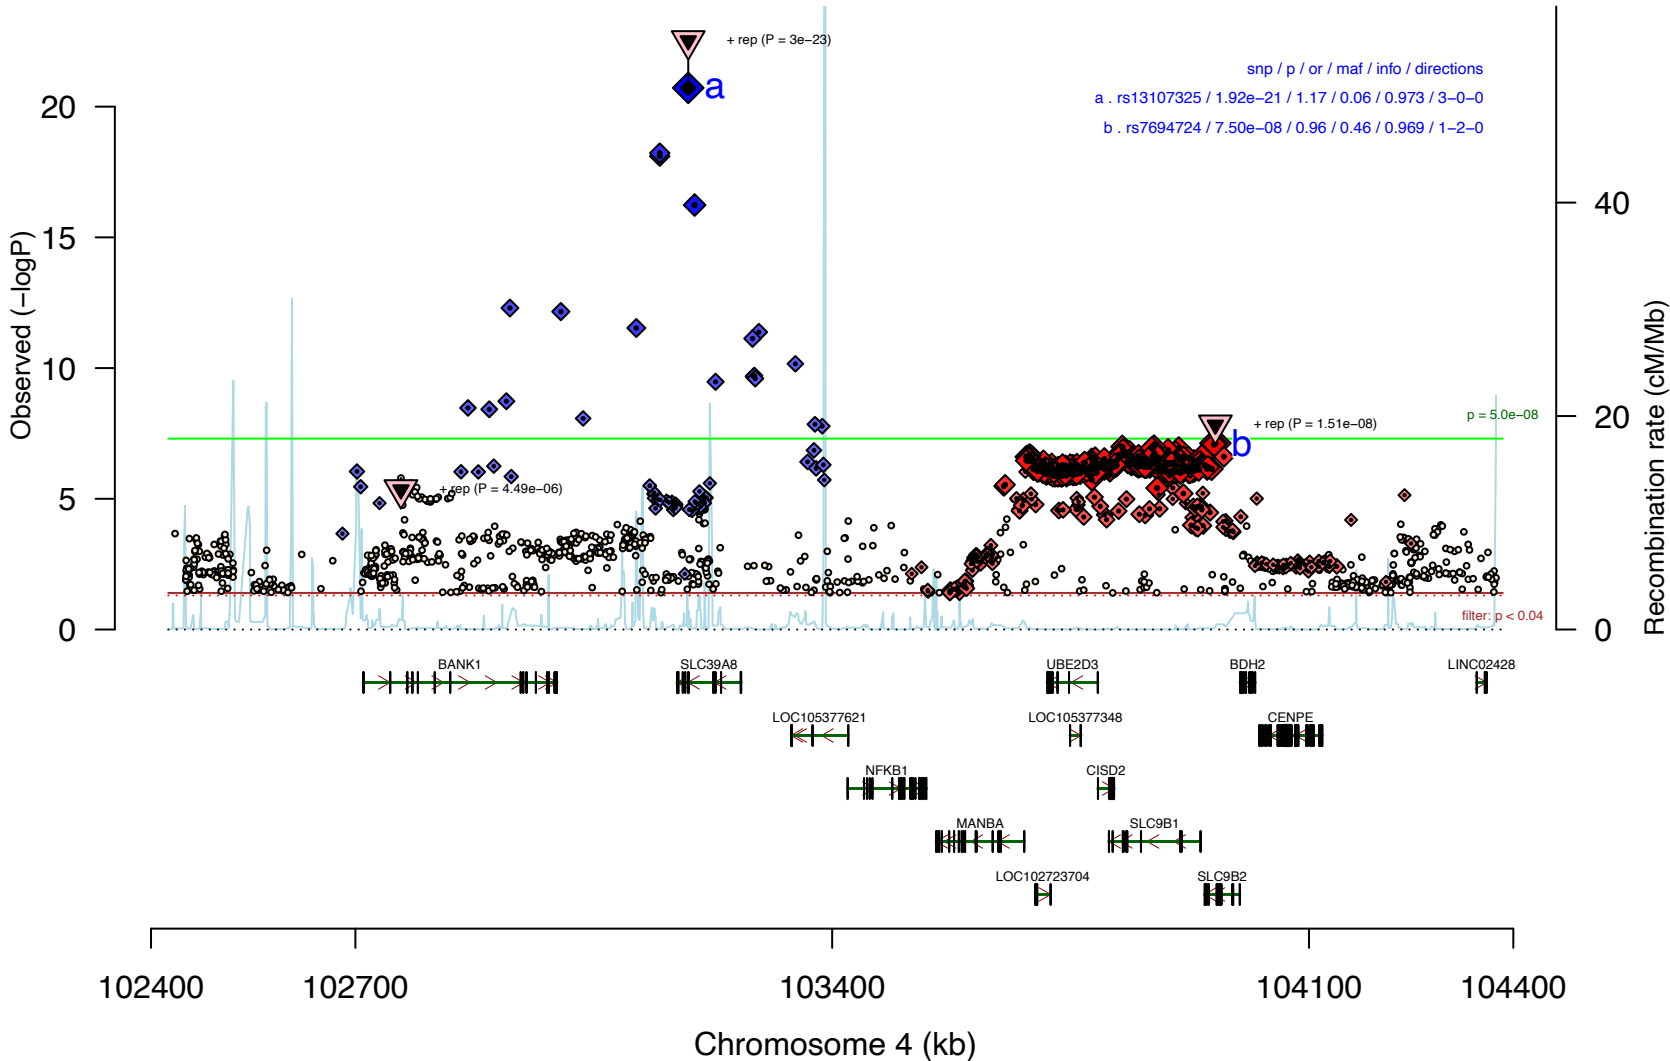

# PGC\_SCZ\_w3\_90\_0418b.7.chr12

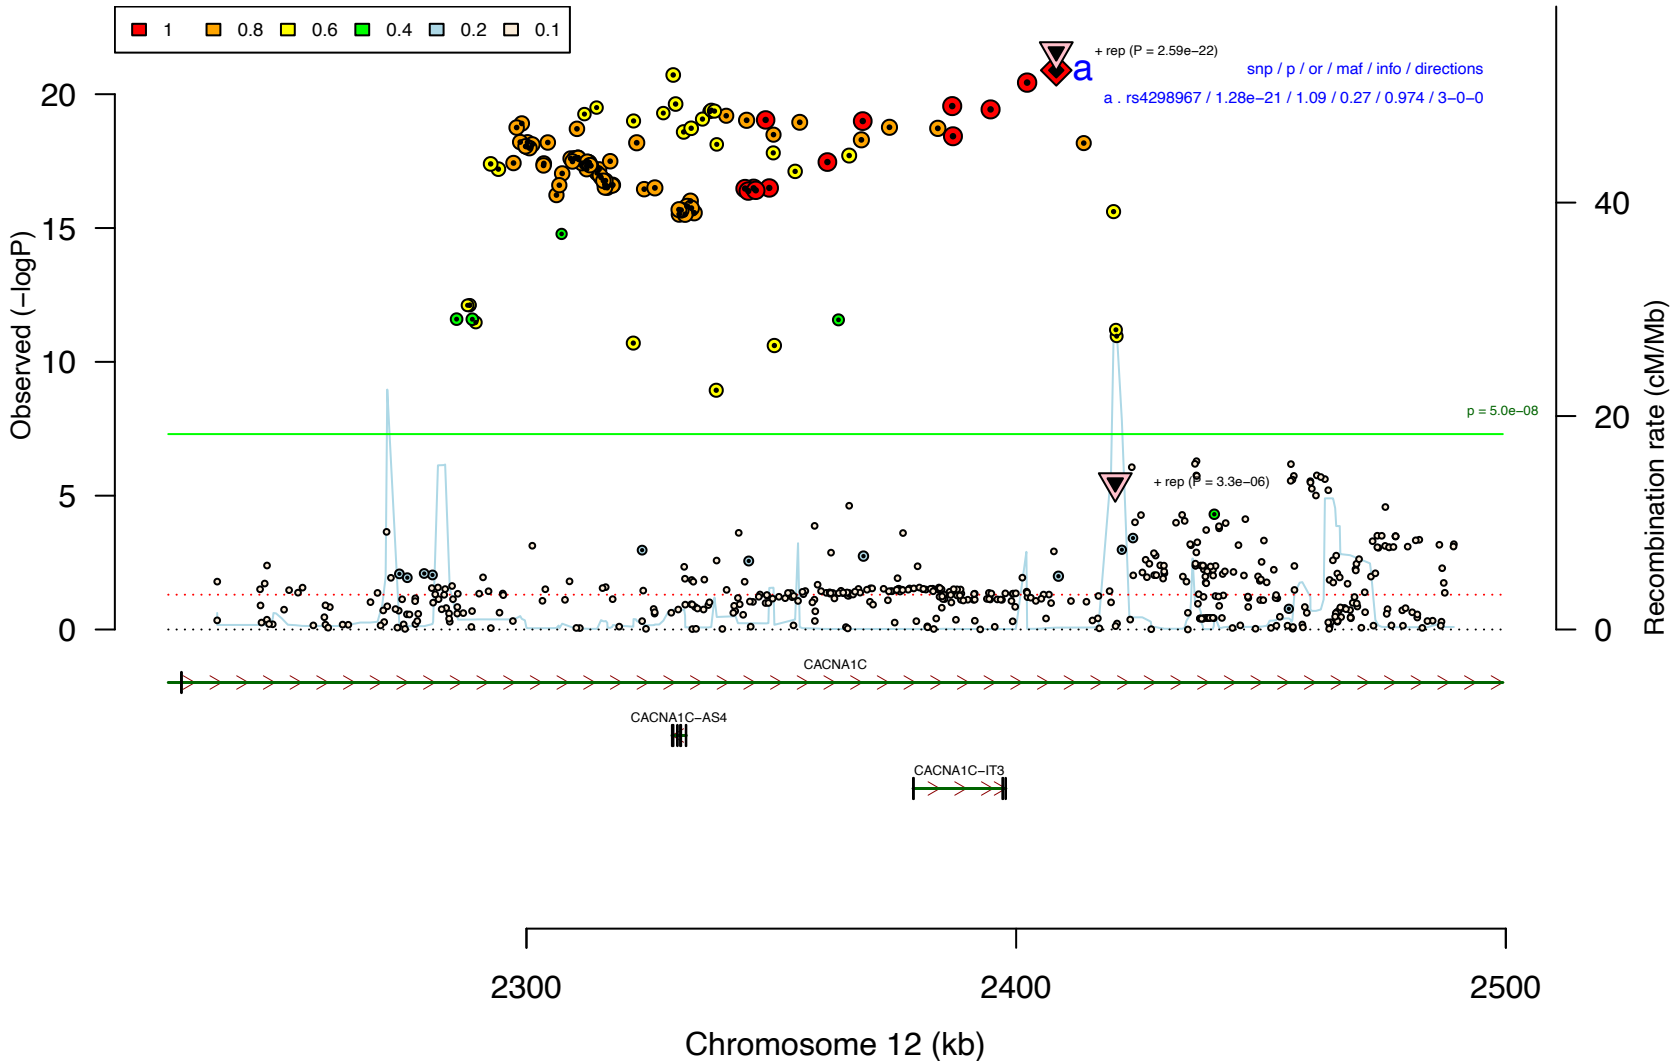

# PGC\_SCZ\_w3\_90\_0418b.8.chr3

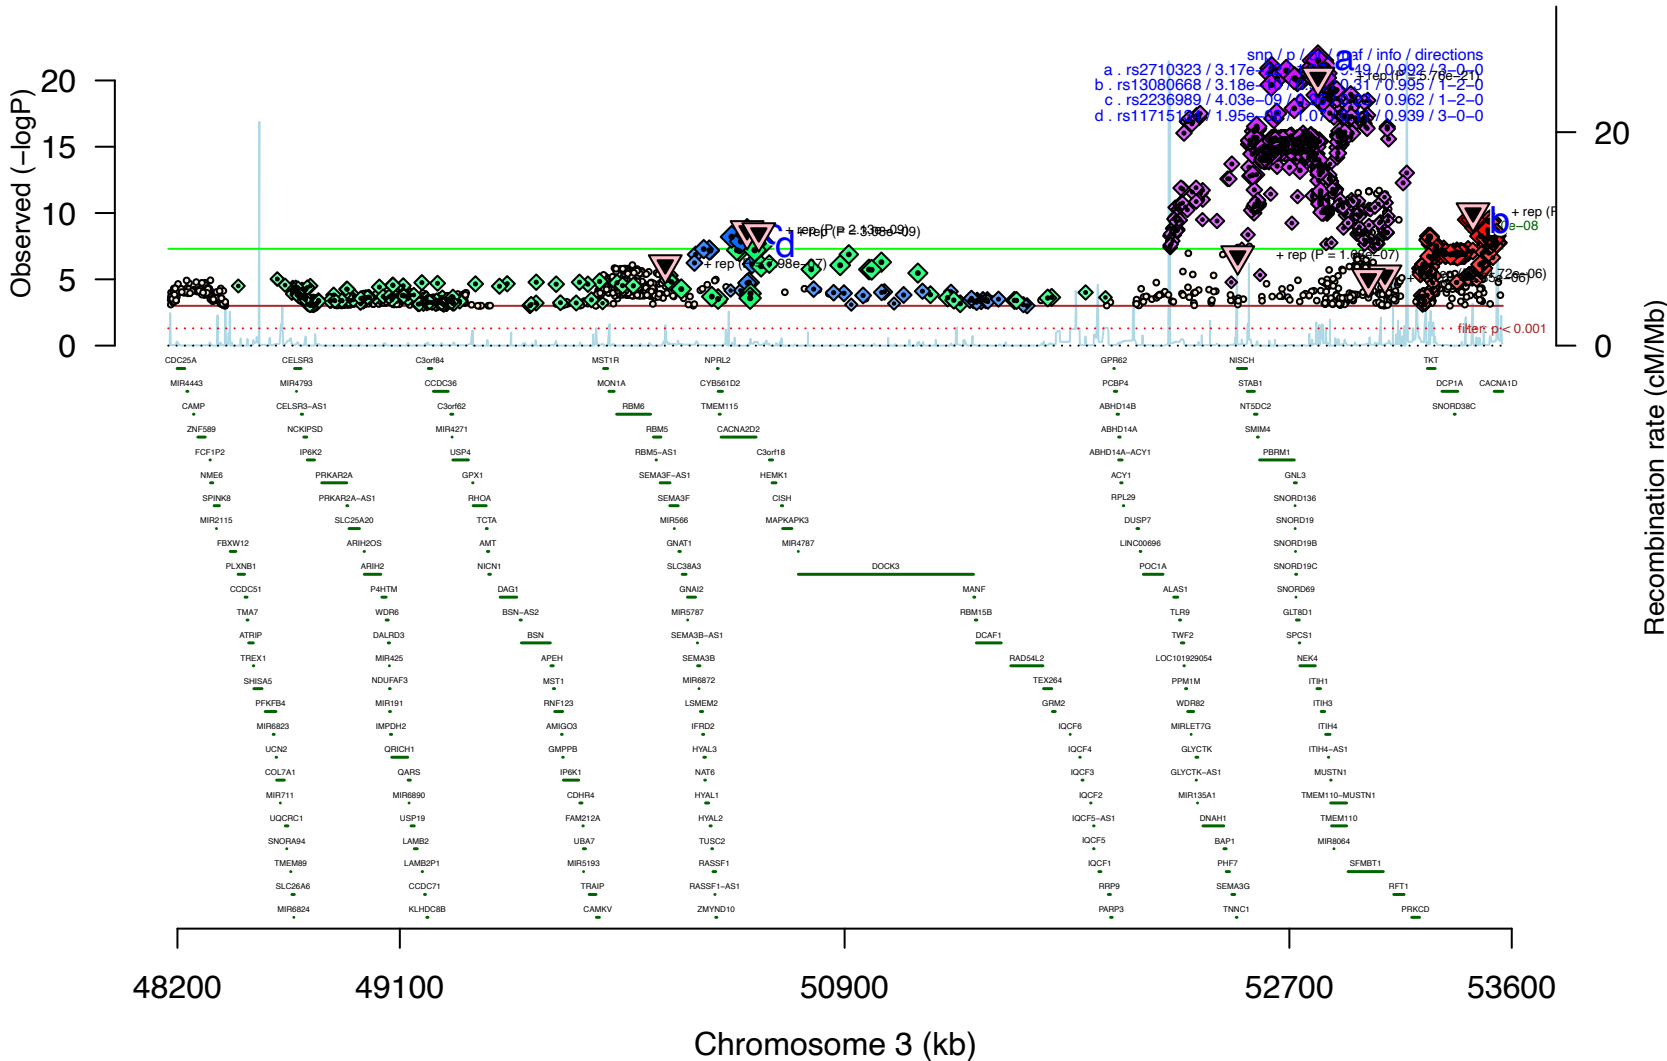

# PGC\_SCZ\_w3\_90\_0418b.9.chr2

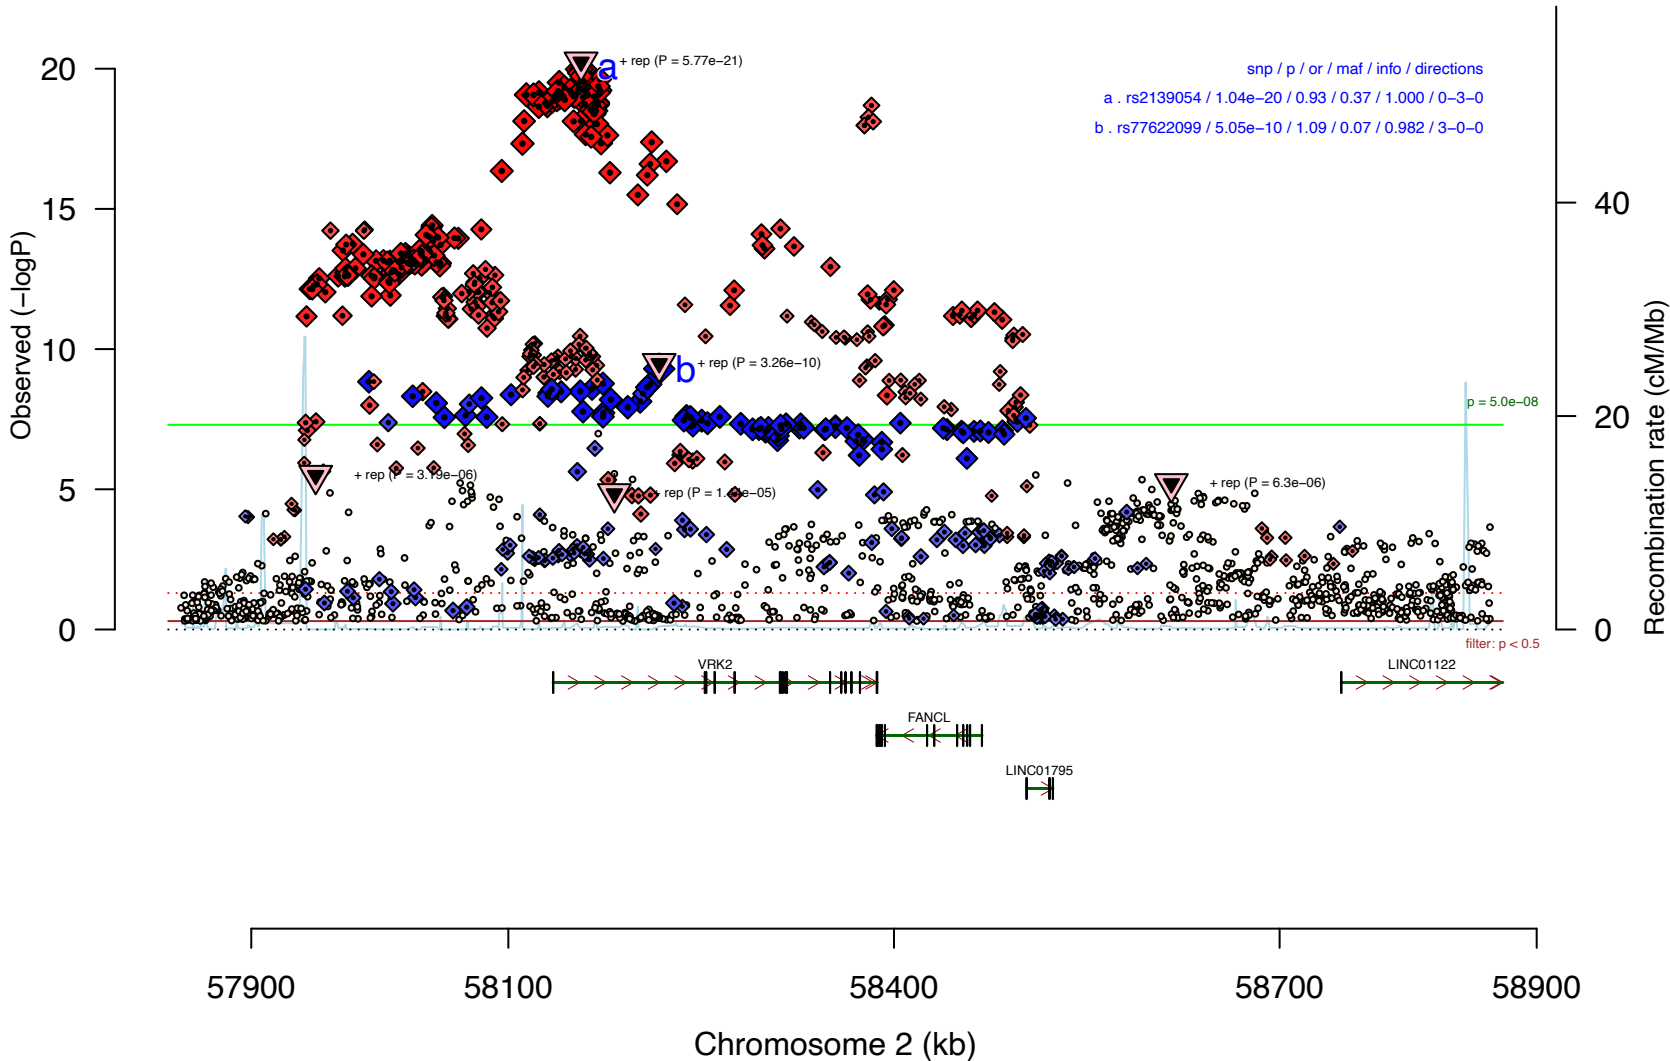

# PGC\_SCZ\_w3\_90\_0418b.10.chr1

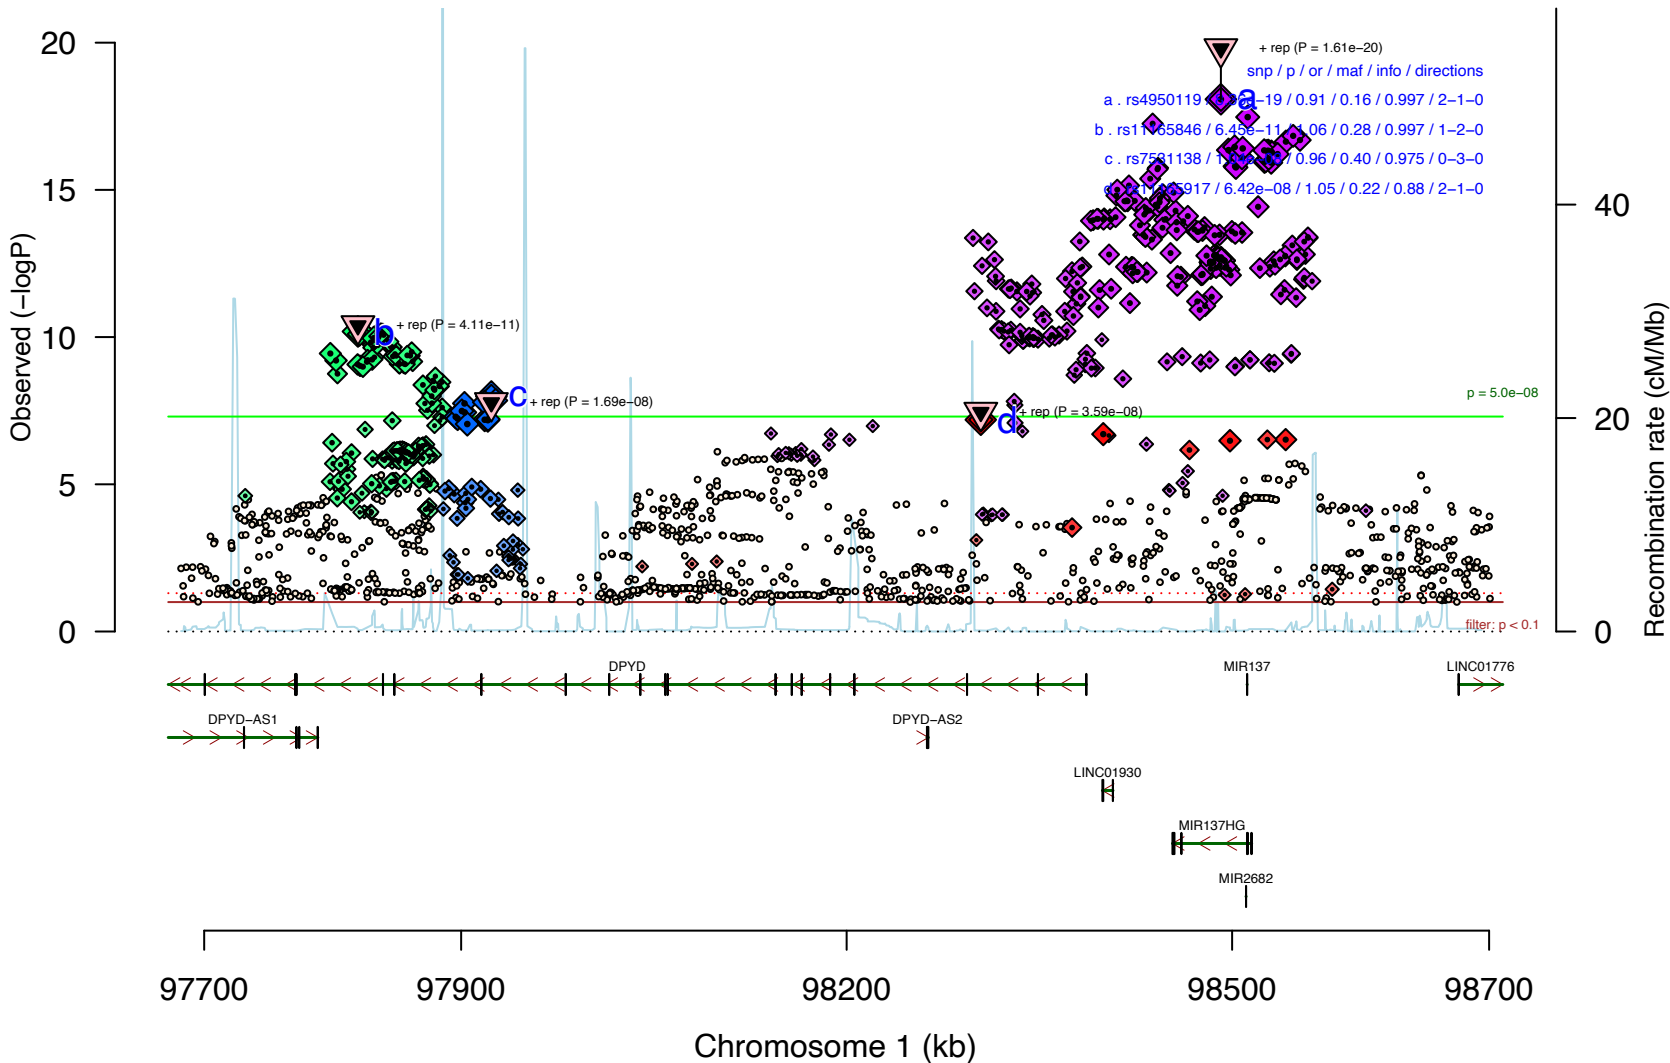

# PGC\_SCZ\_w3\_90\_0418b.11.chr7

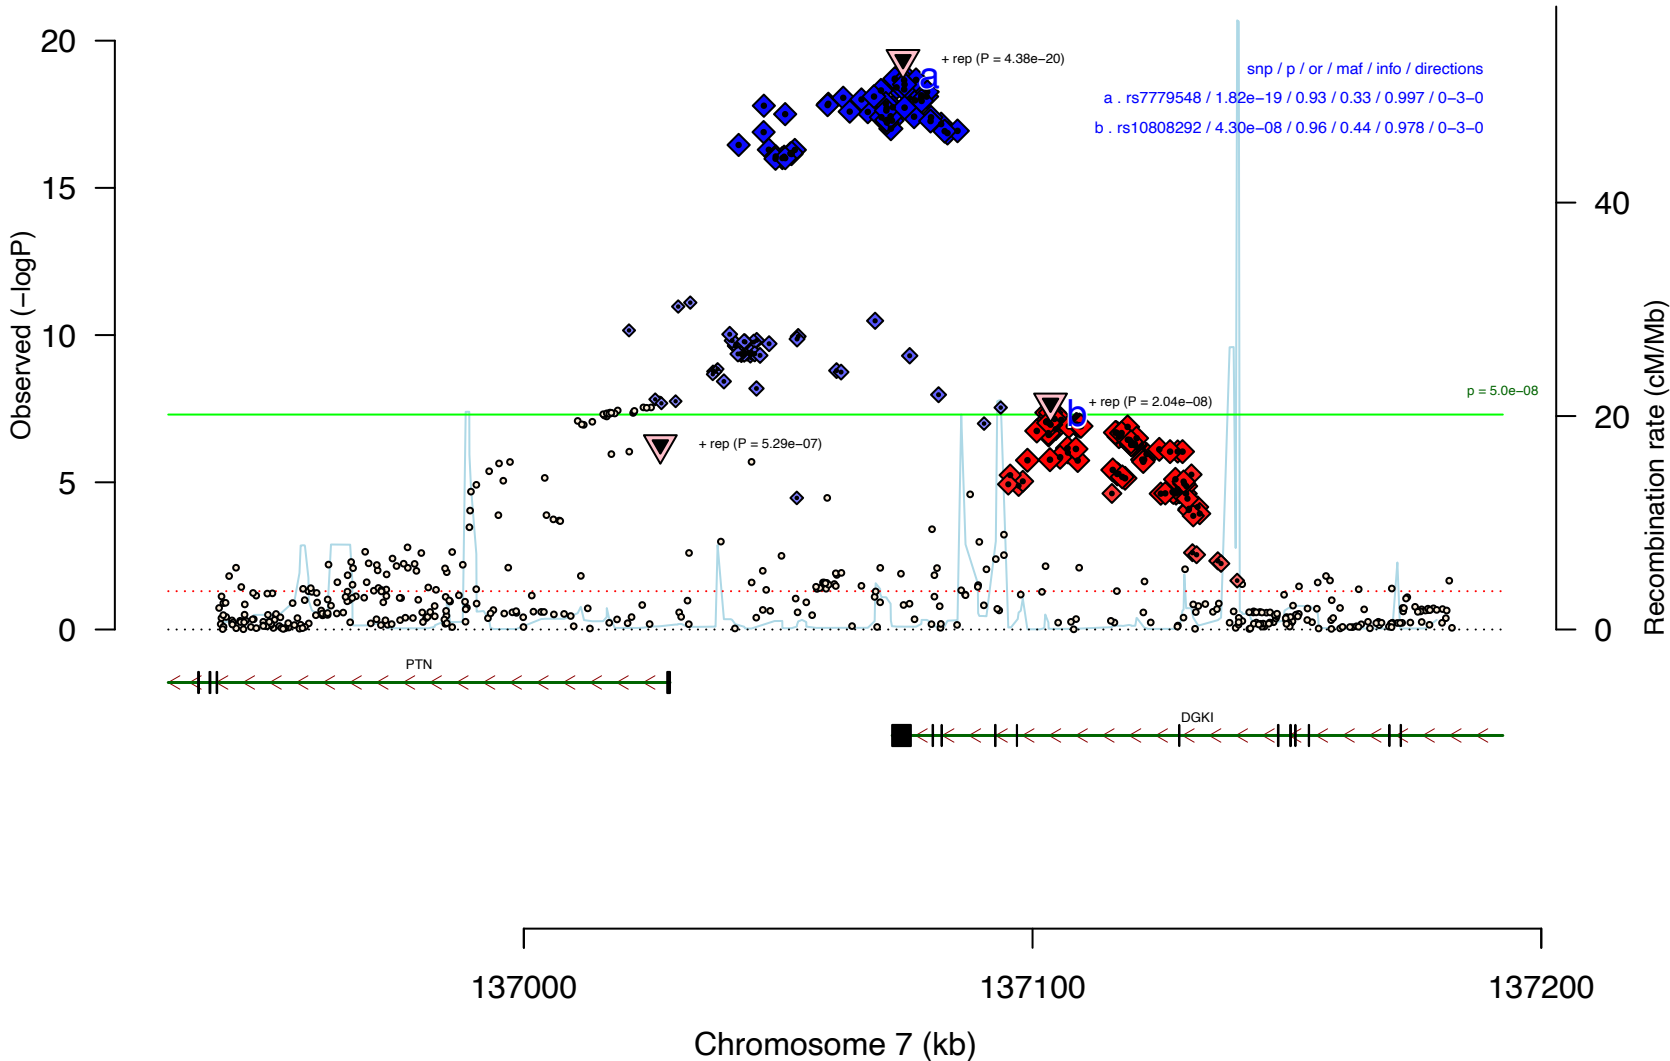

# PGC\_SCZ\_w3\_90\_0418b.12.chr8

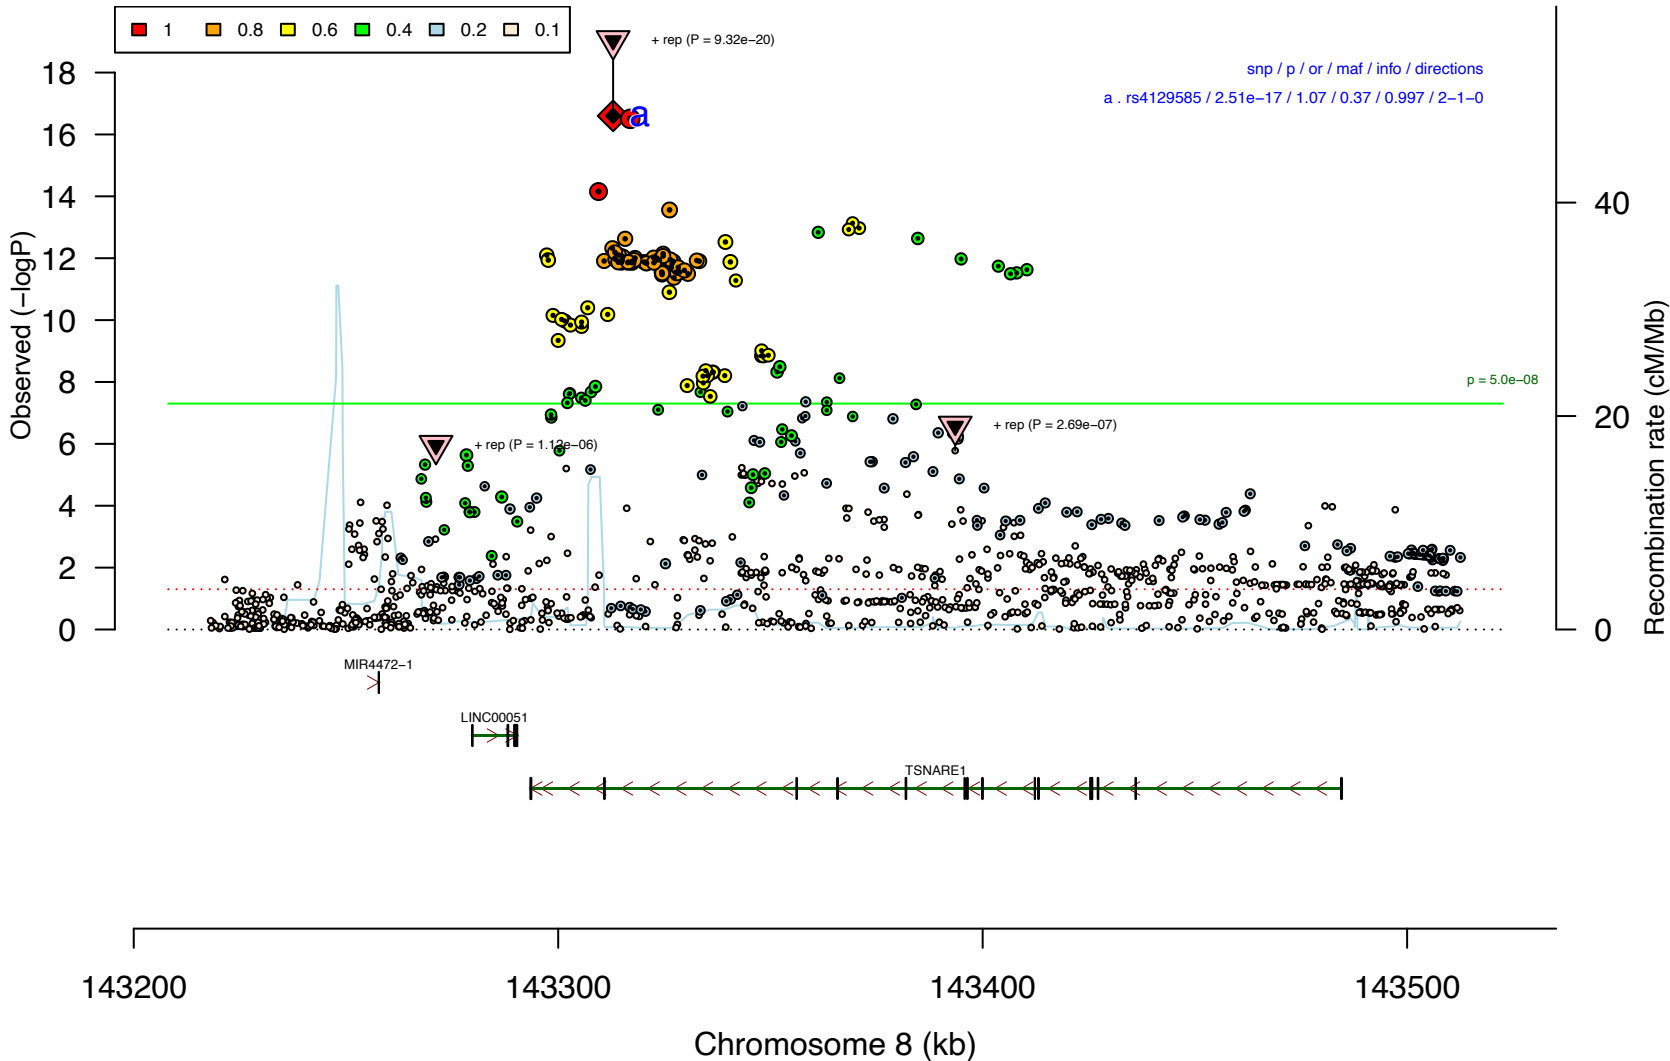



# PGC\_SCZ\_w3\_90\_0418b.13.chr11

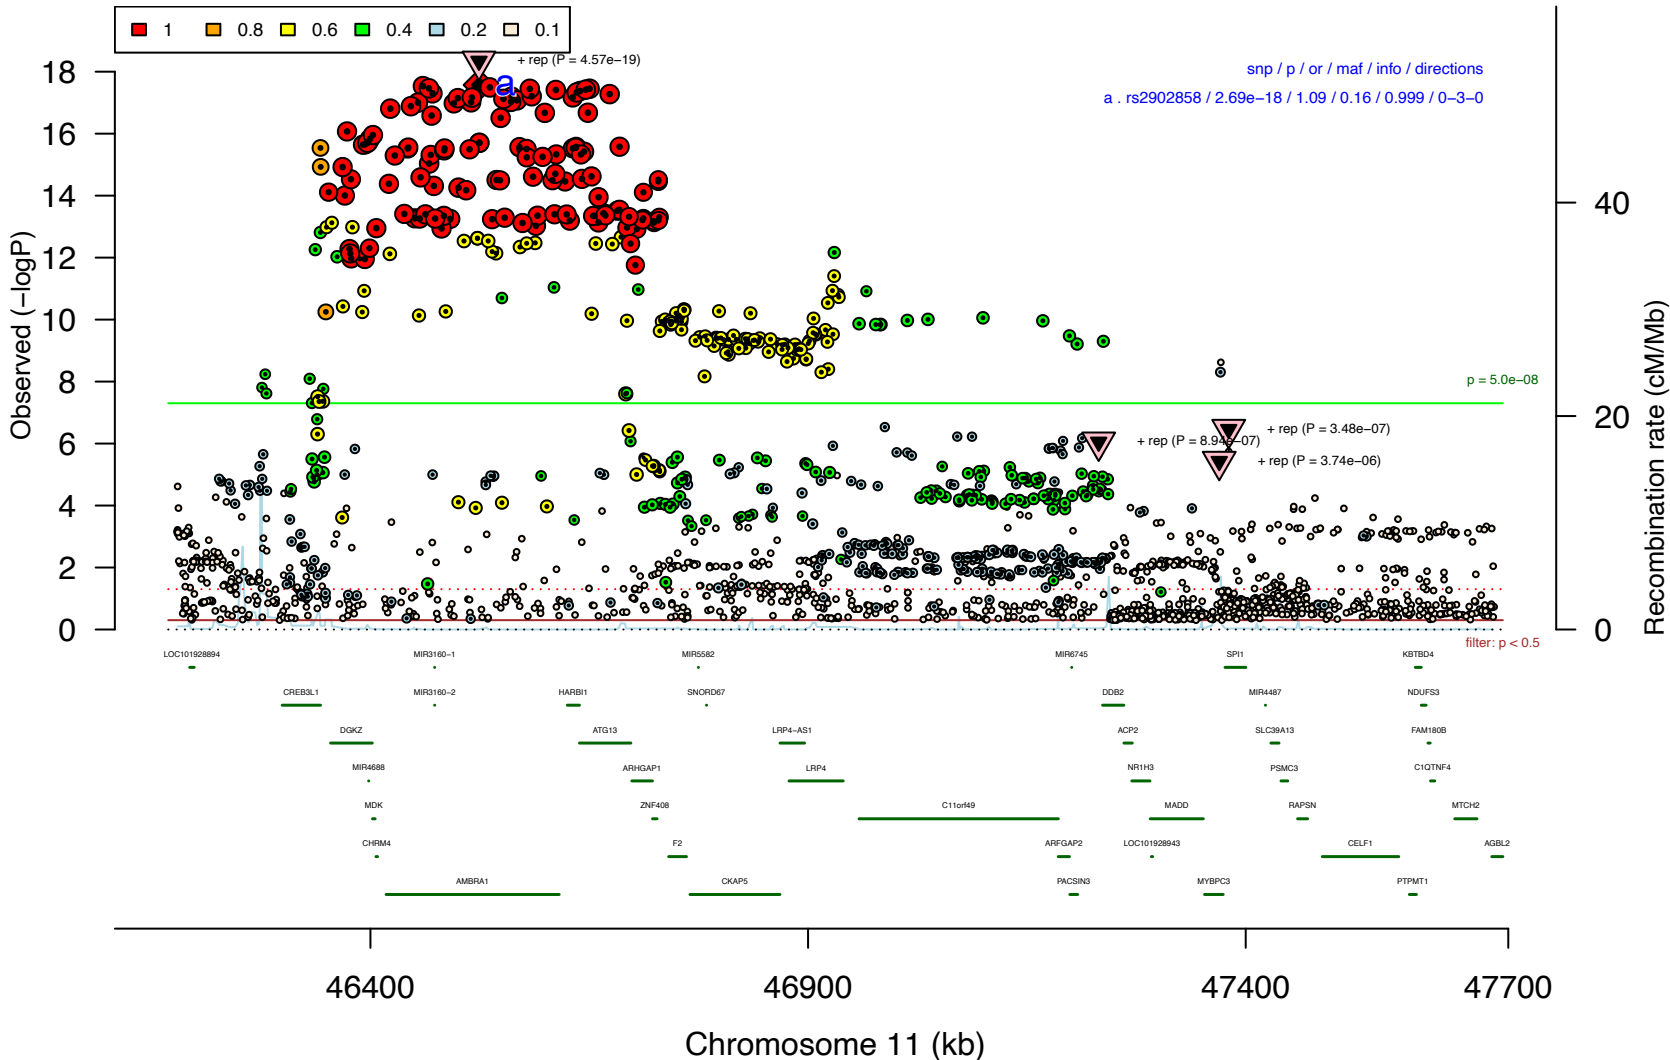

# PGC\_SCZ\_w3\_90\_0418b.14.chr14

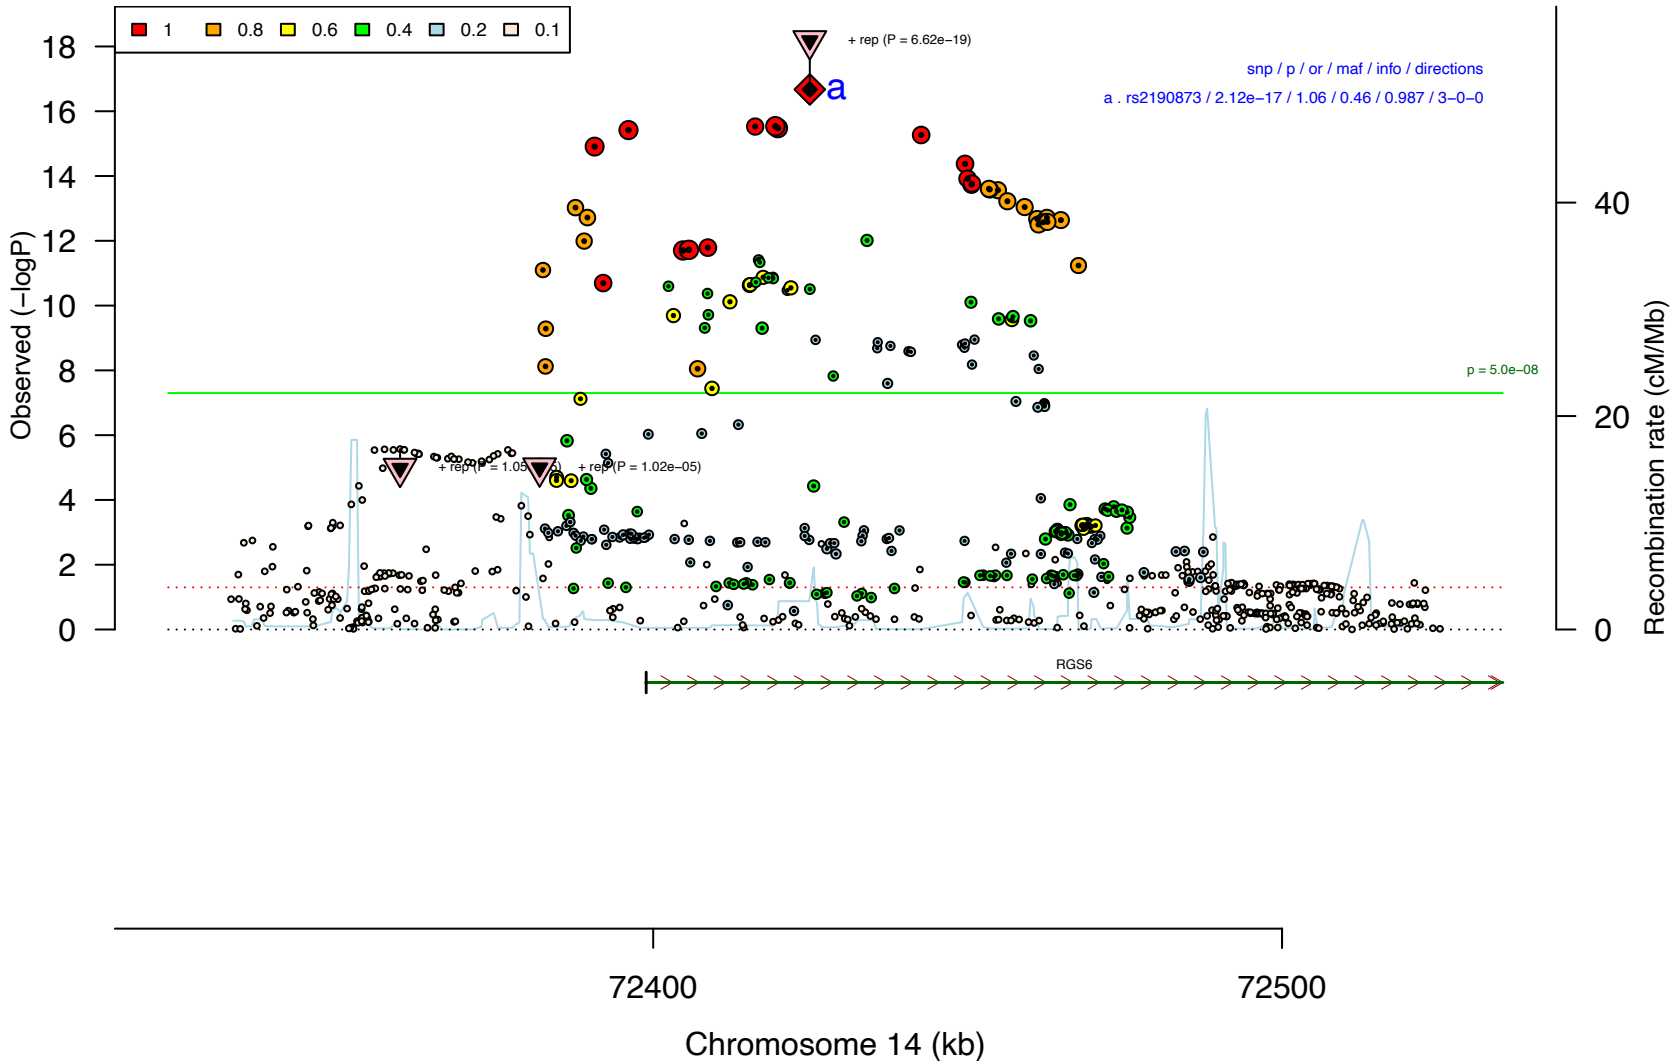

# PGC\_SCZ\_w3\_90\_0418b.15.chr1

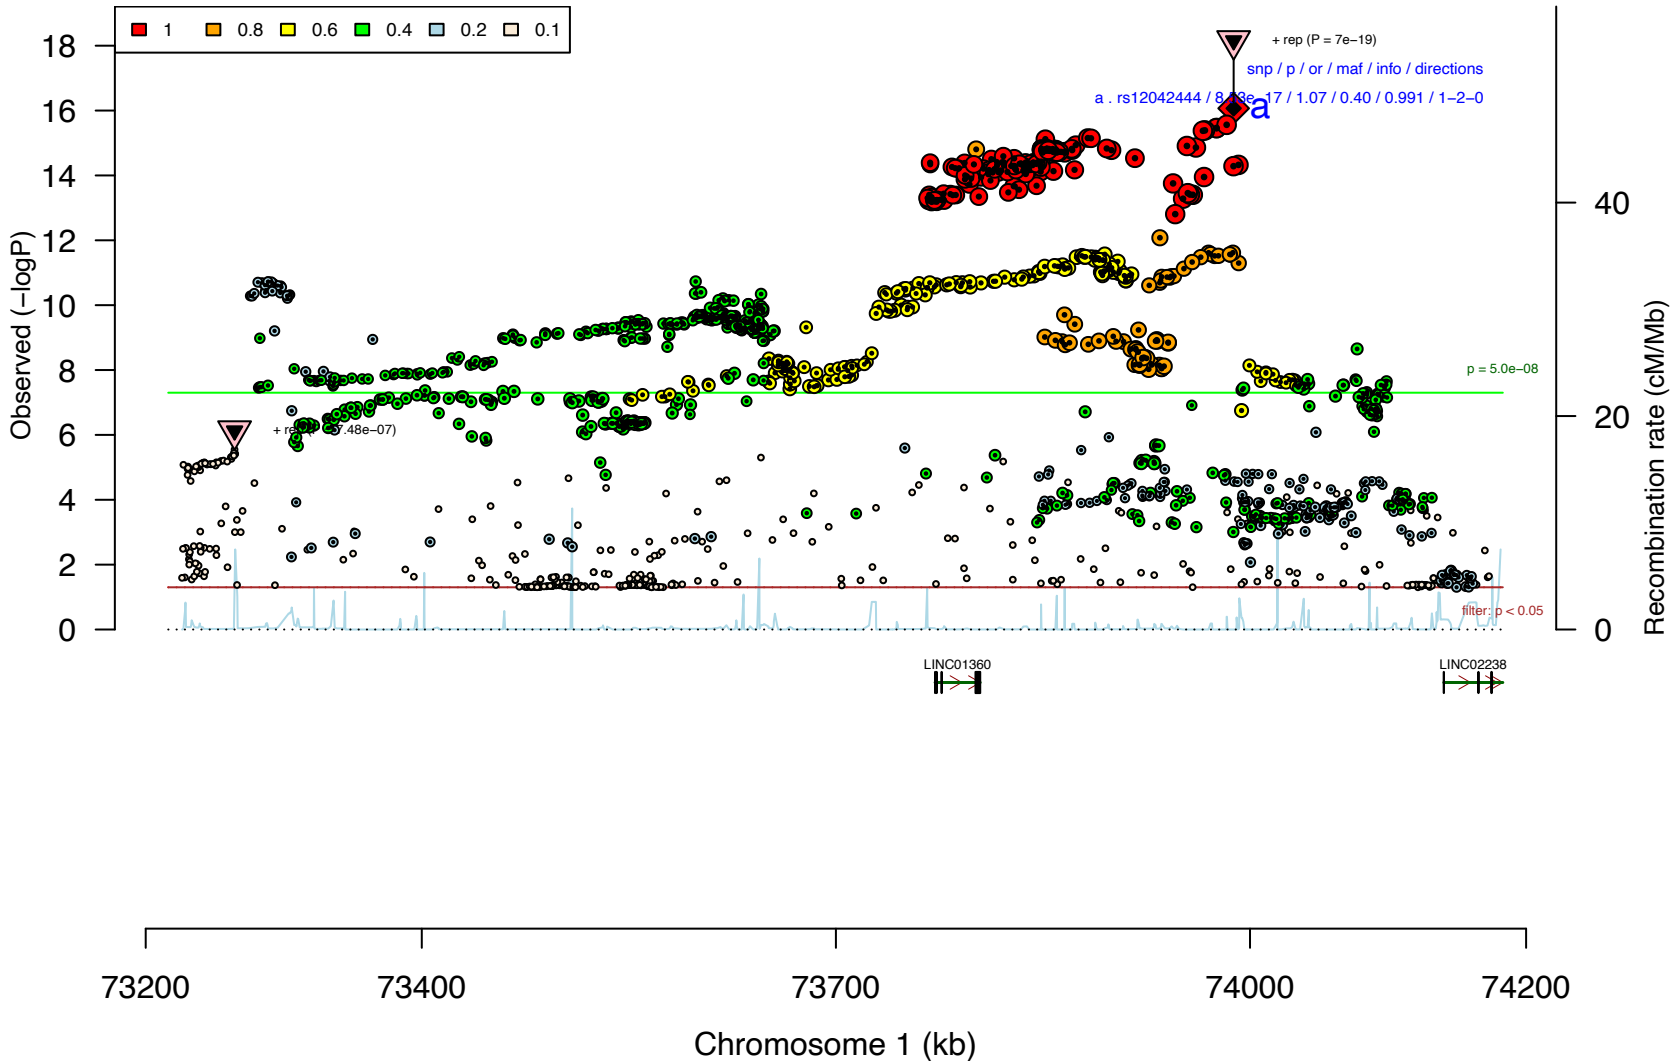

# PGC\_SCZ\_w3\_90\_0418b.16.chr5

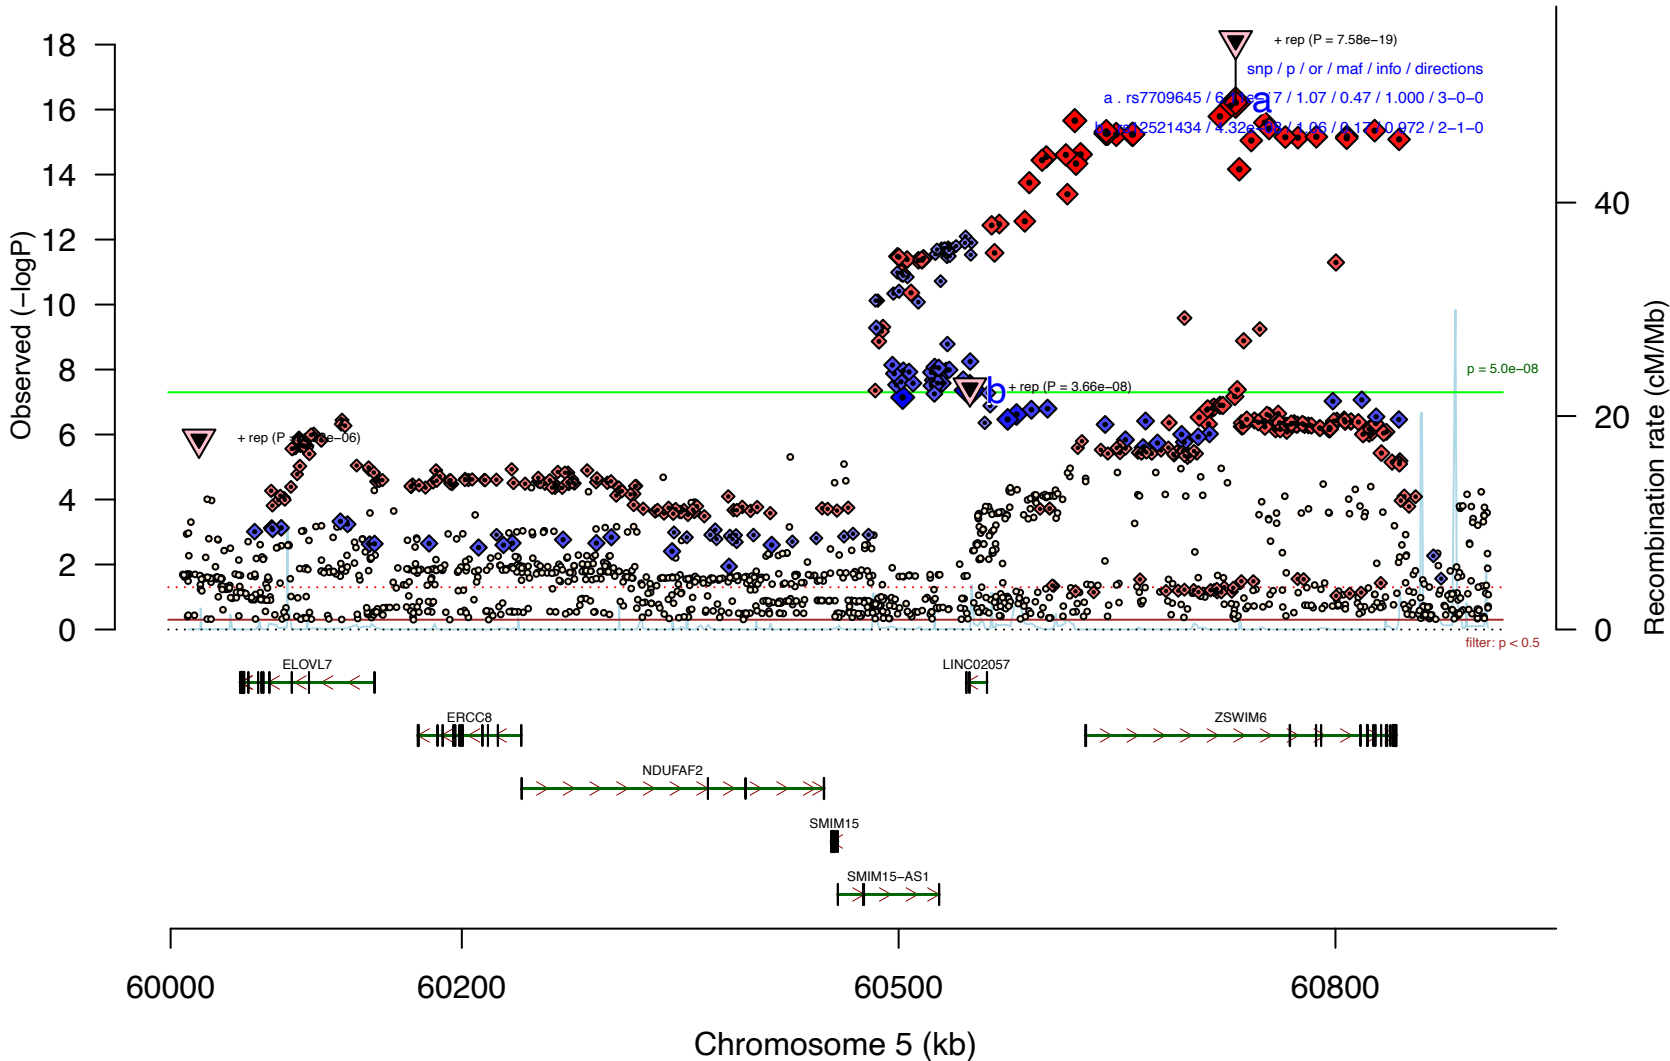

# PGC\_SCZ\_w3\_90\_0418b.17.chr3

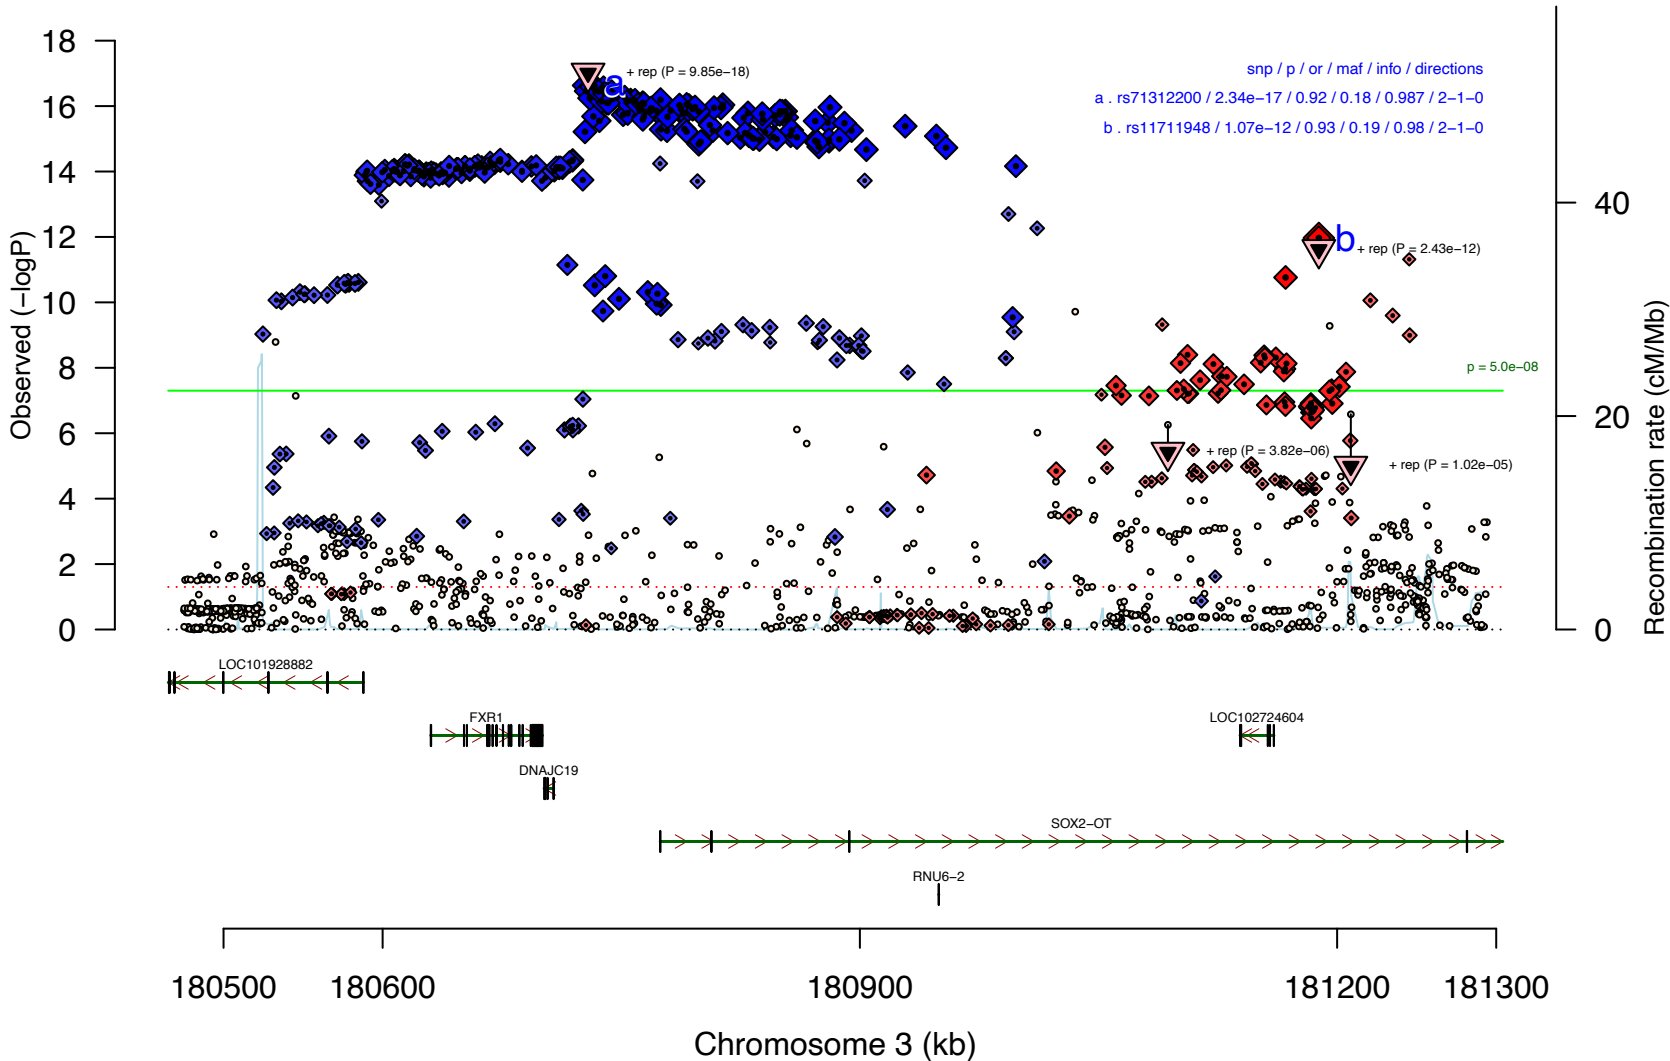

# PGC\_SCZ\_w3\_90\_0418b.18.chr10

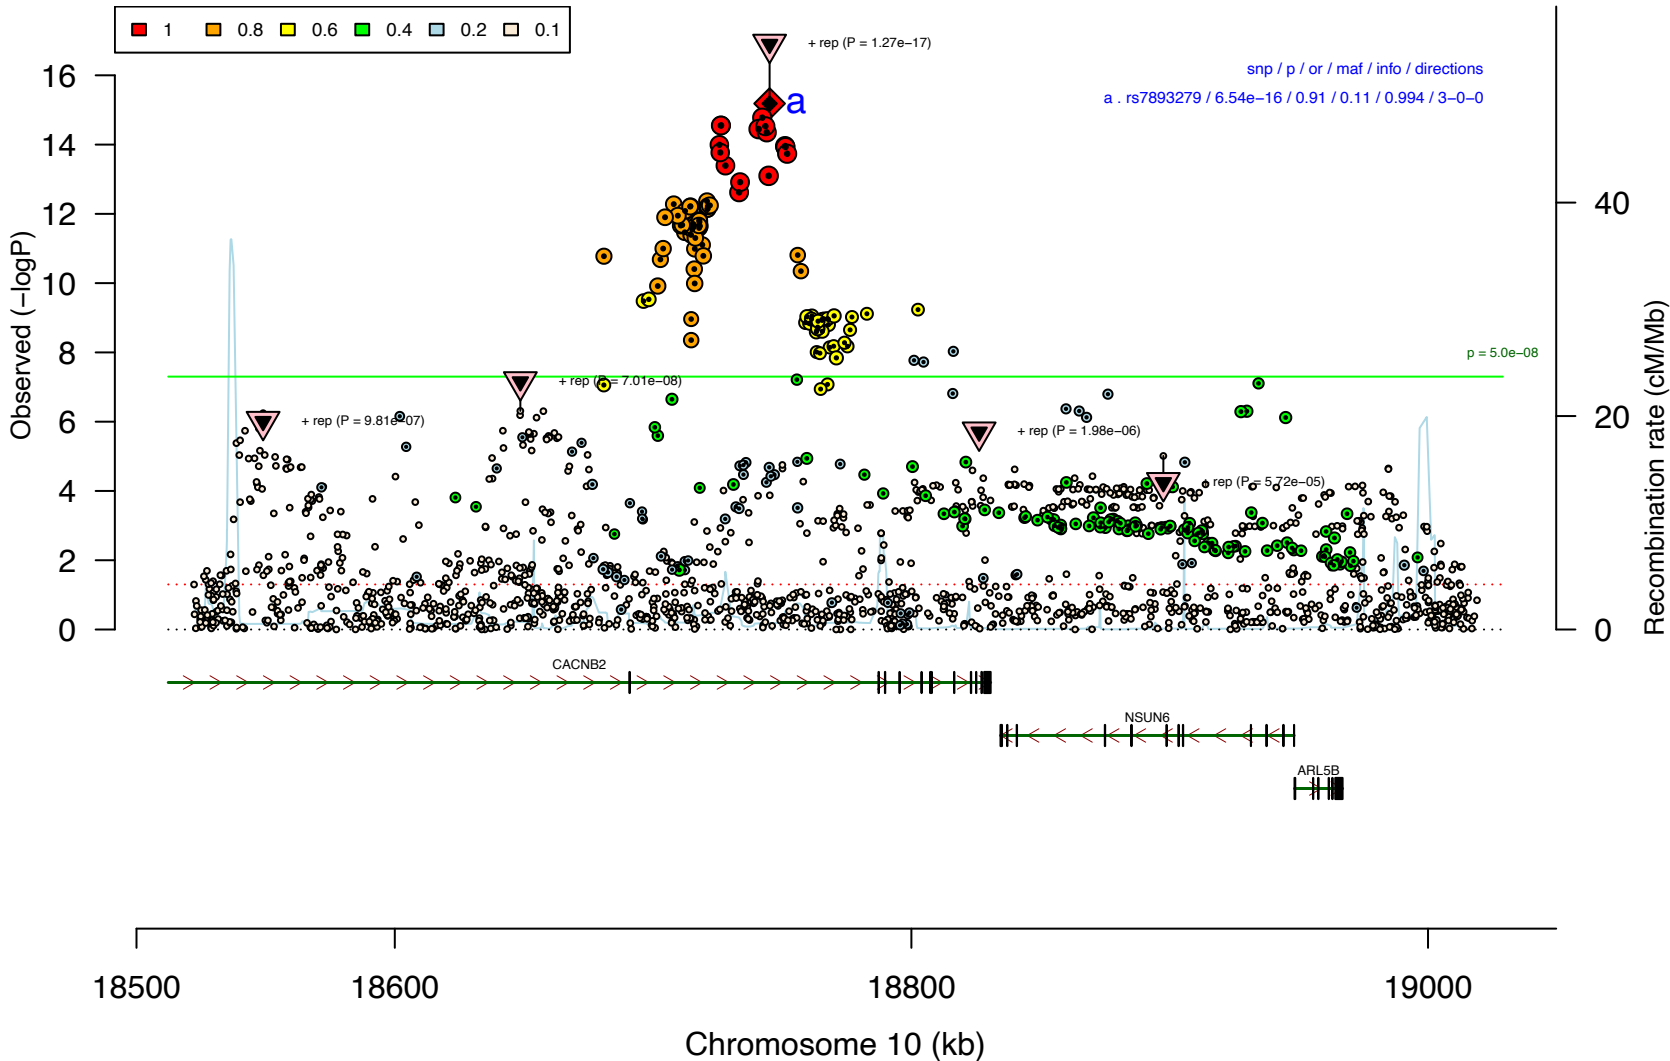

# PGC\_SCZ\_w3\_90\_0418b.19.chr2

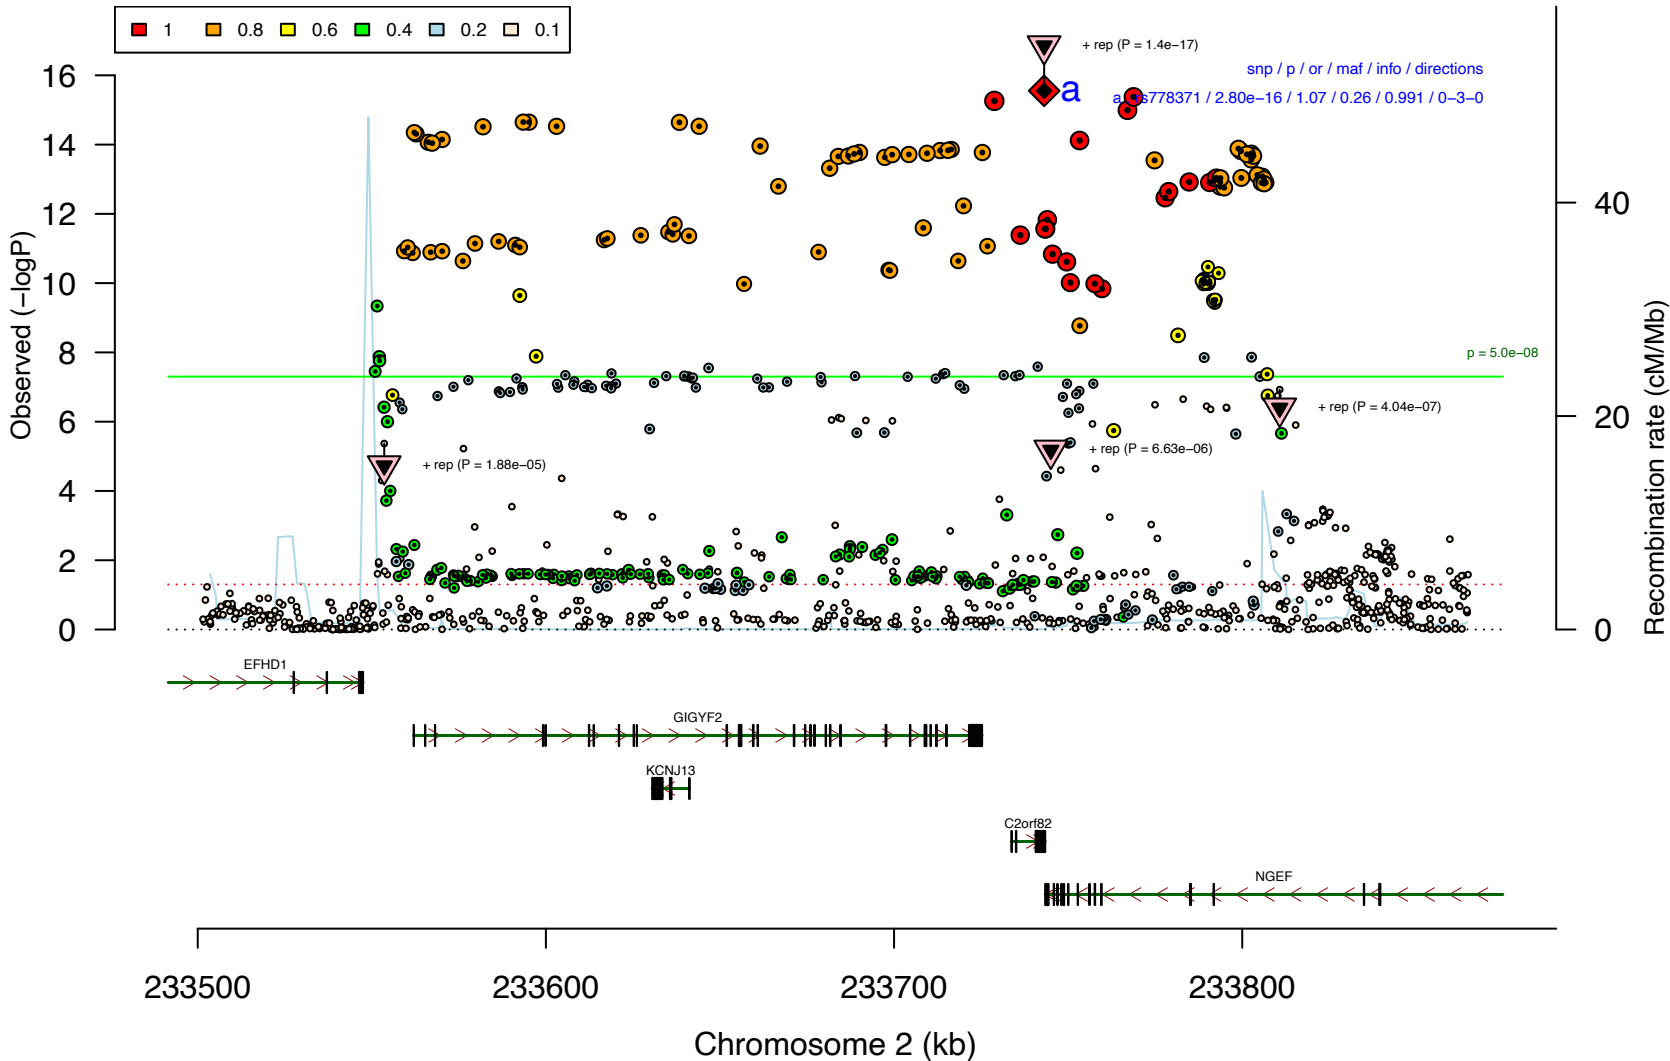

# PGC\_SCZ\_w3\_90\_0418b.20.chr11

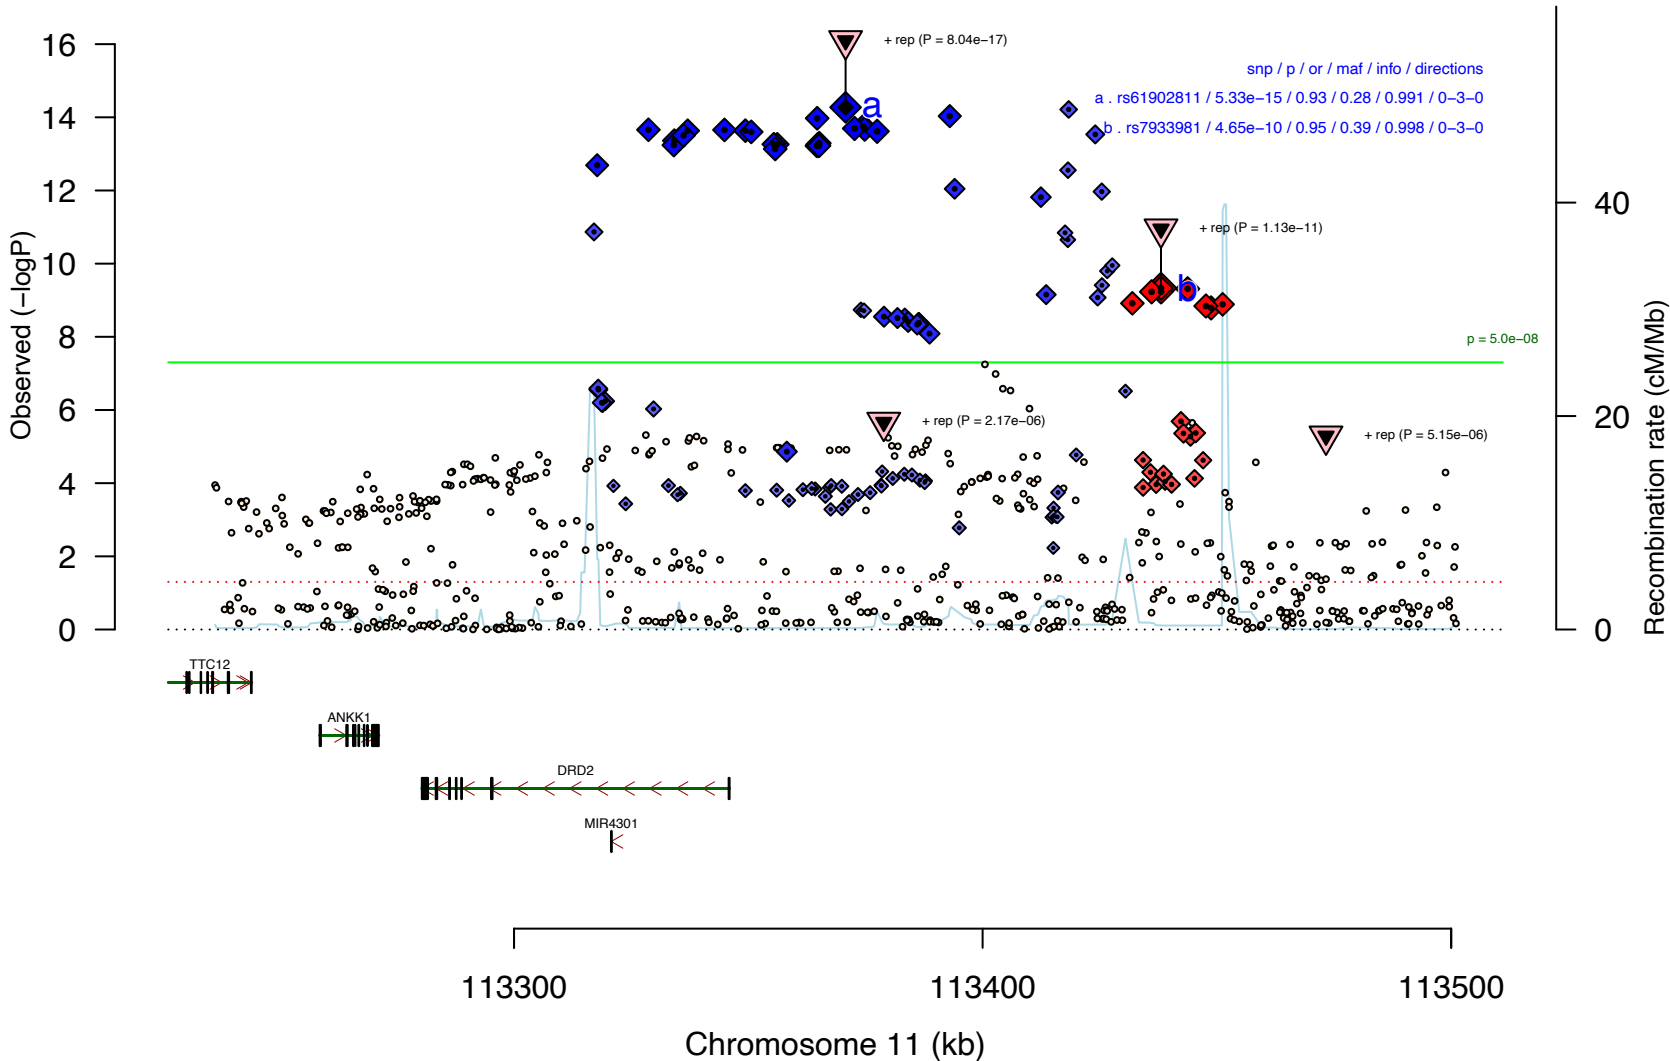



# PGC\_SCZ\_w3\_90\_0418b.21.chr7

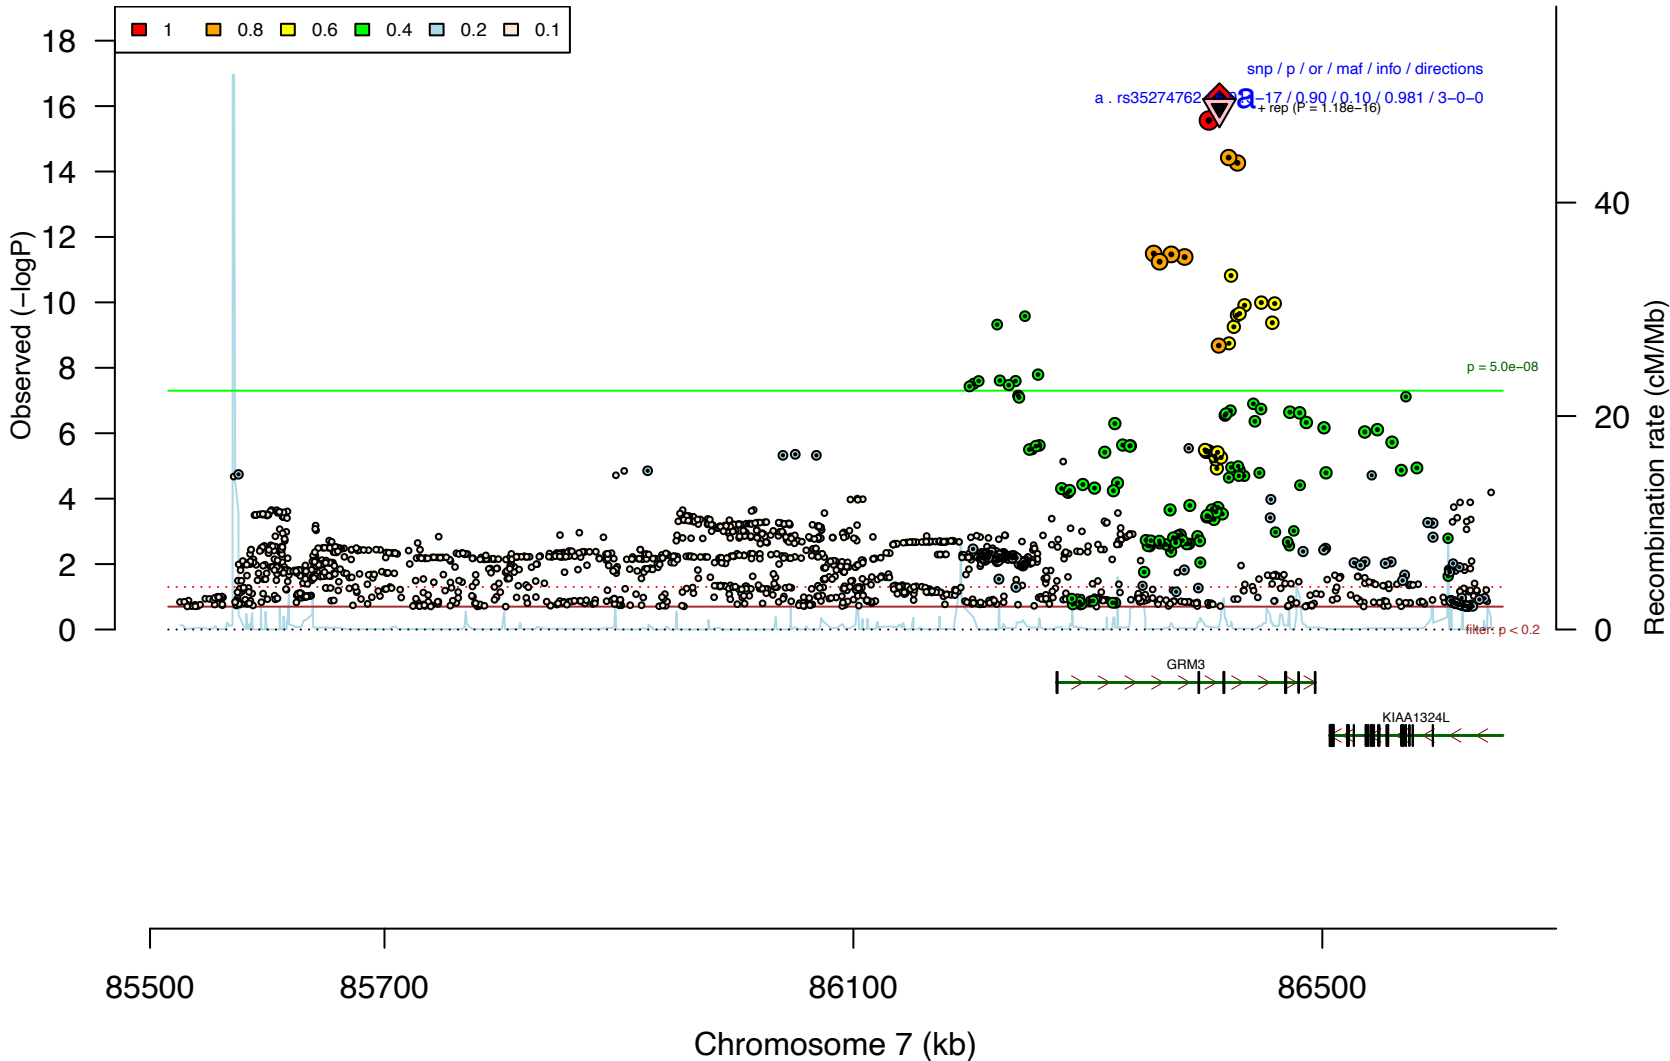

# PGC\_SCZ\_w3\_90\_0418b.22.chr20

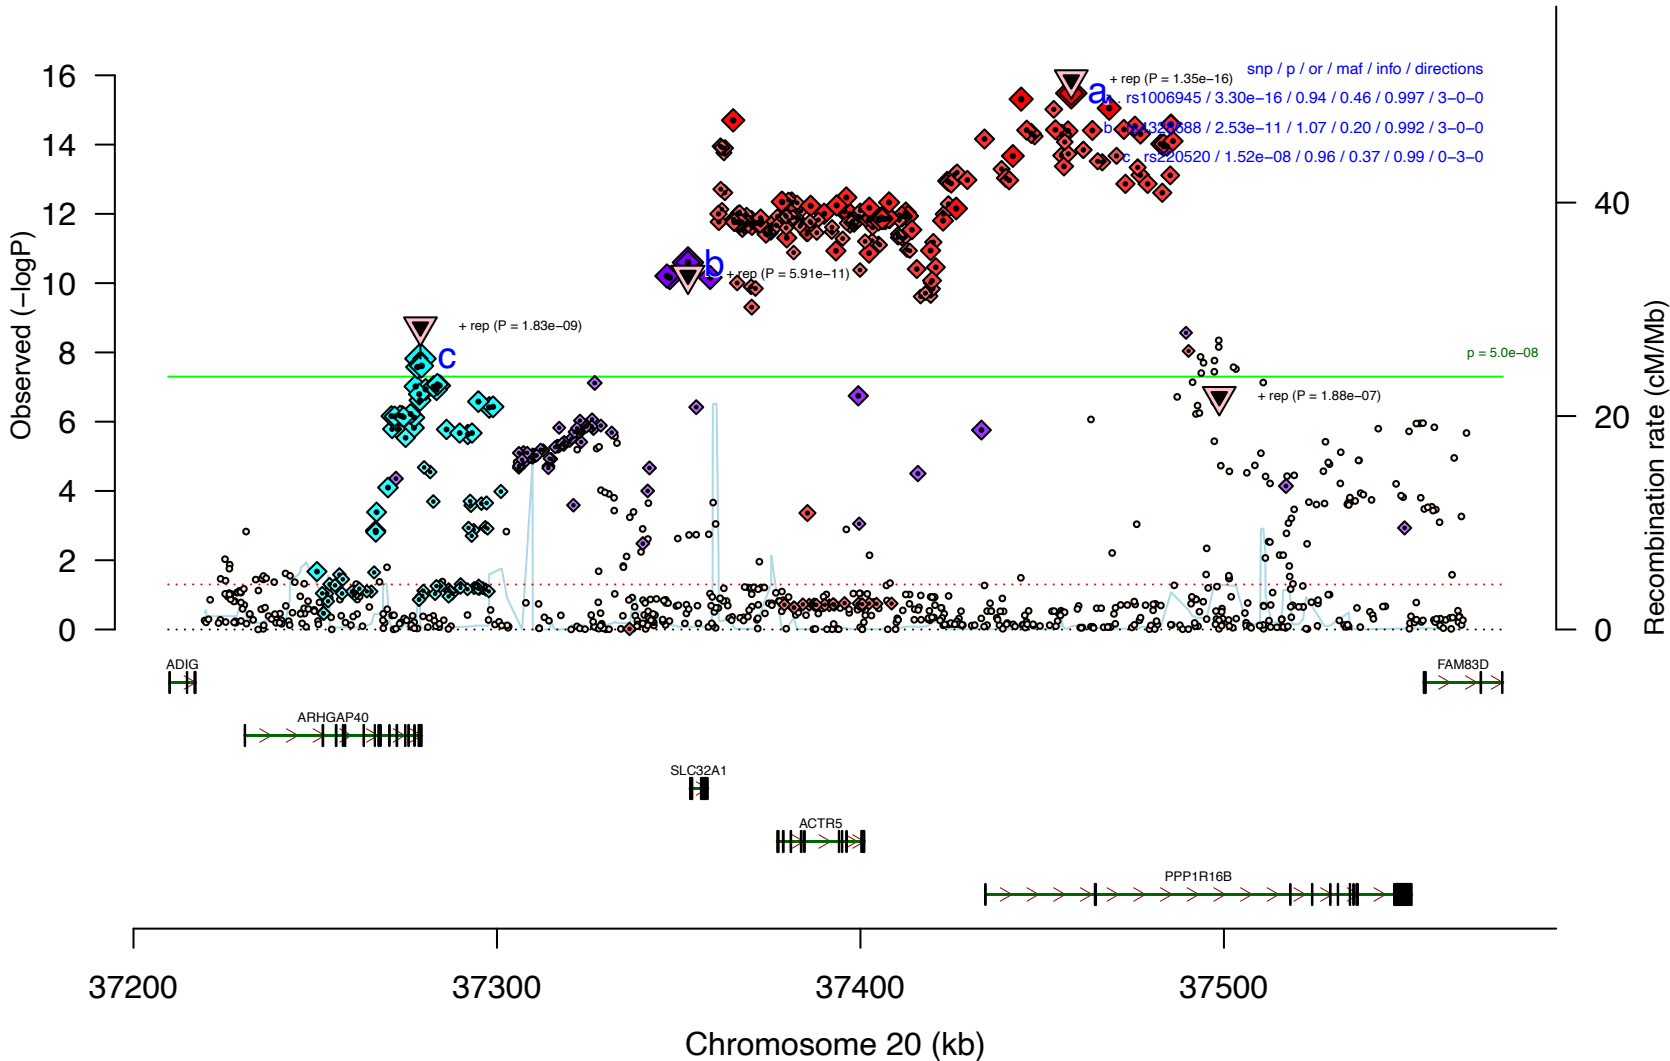

# PGC\_SCZ\_w3\_90\_0418b.23.chr15

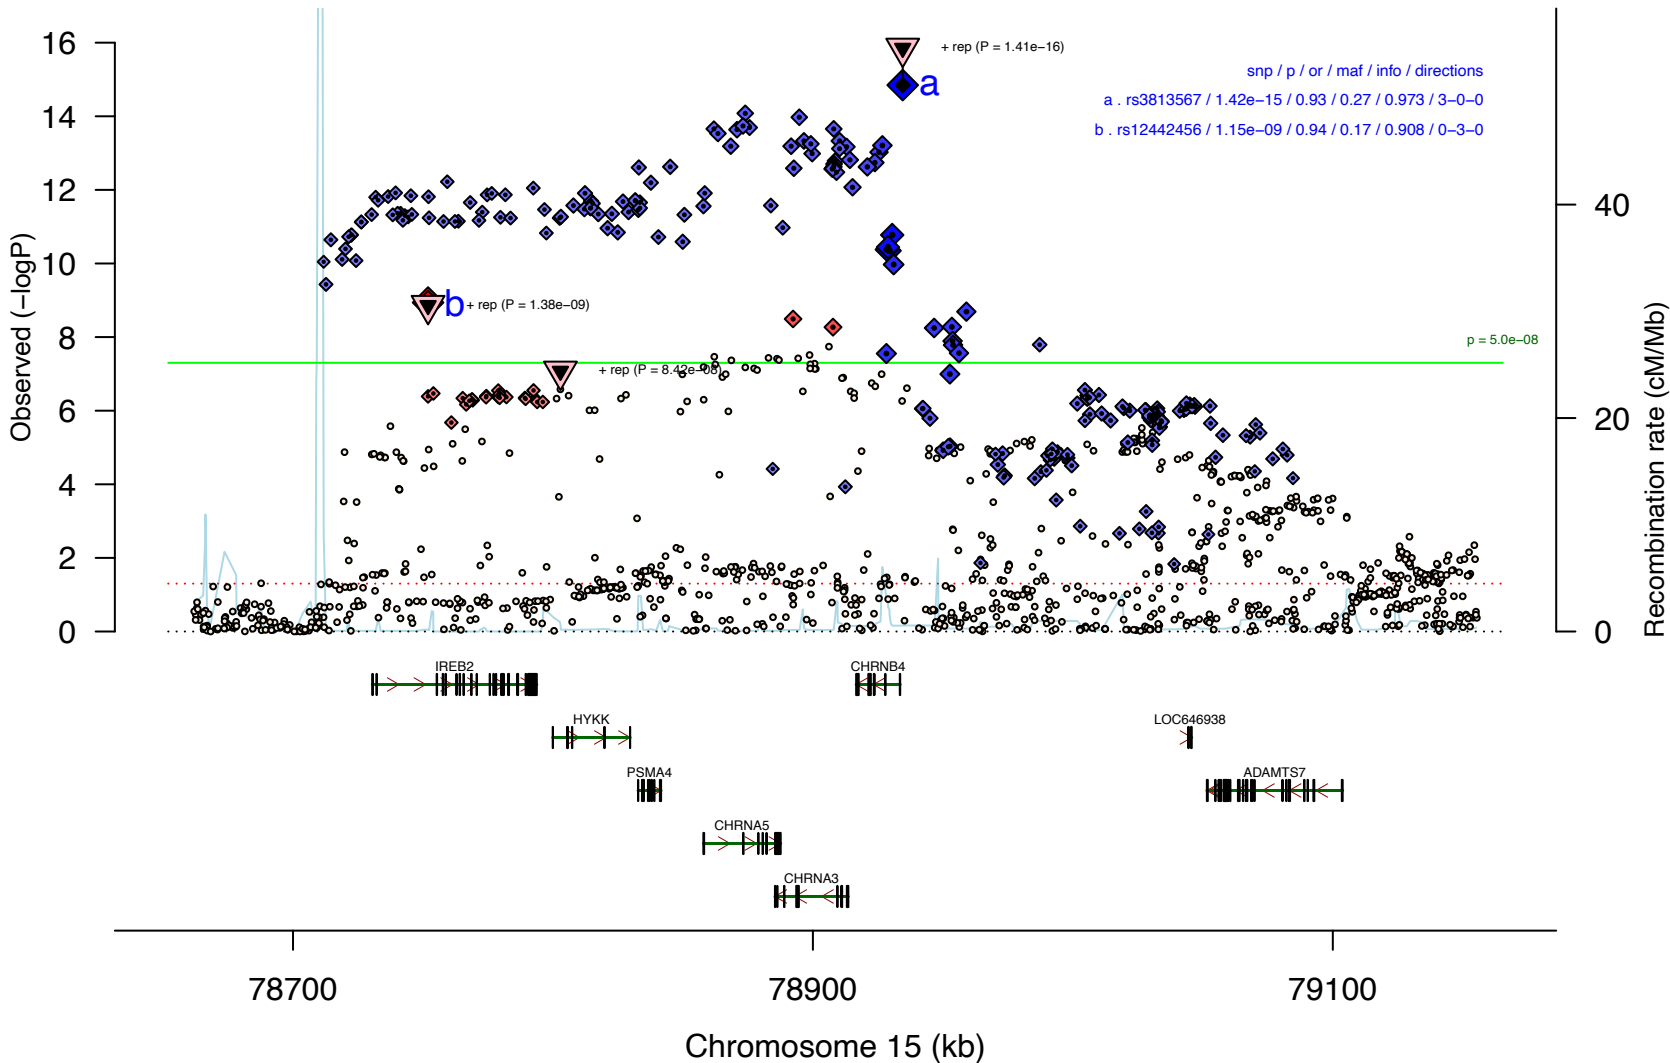

# PGC\_SCZ\_w3\_90\_0418b.24.chr12

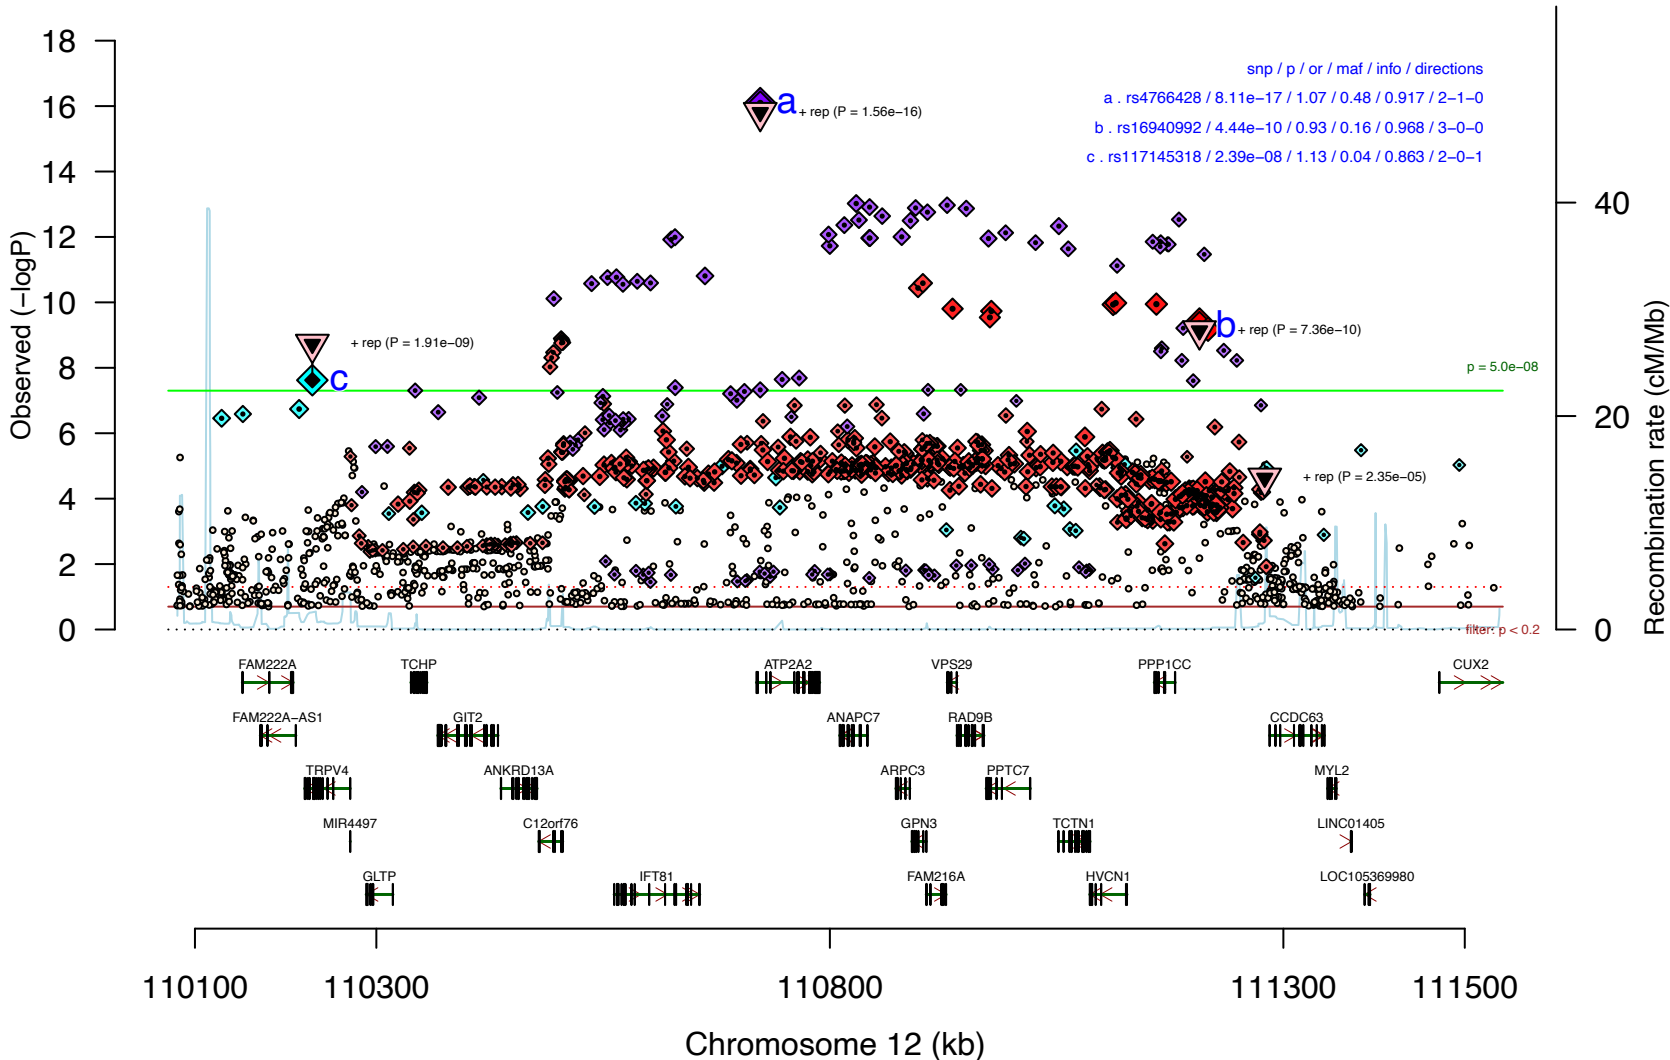

# PGC\_SCZ\_w3\_90\_0418b.25.chr1

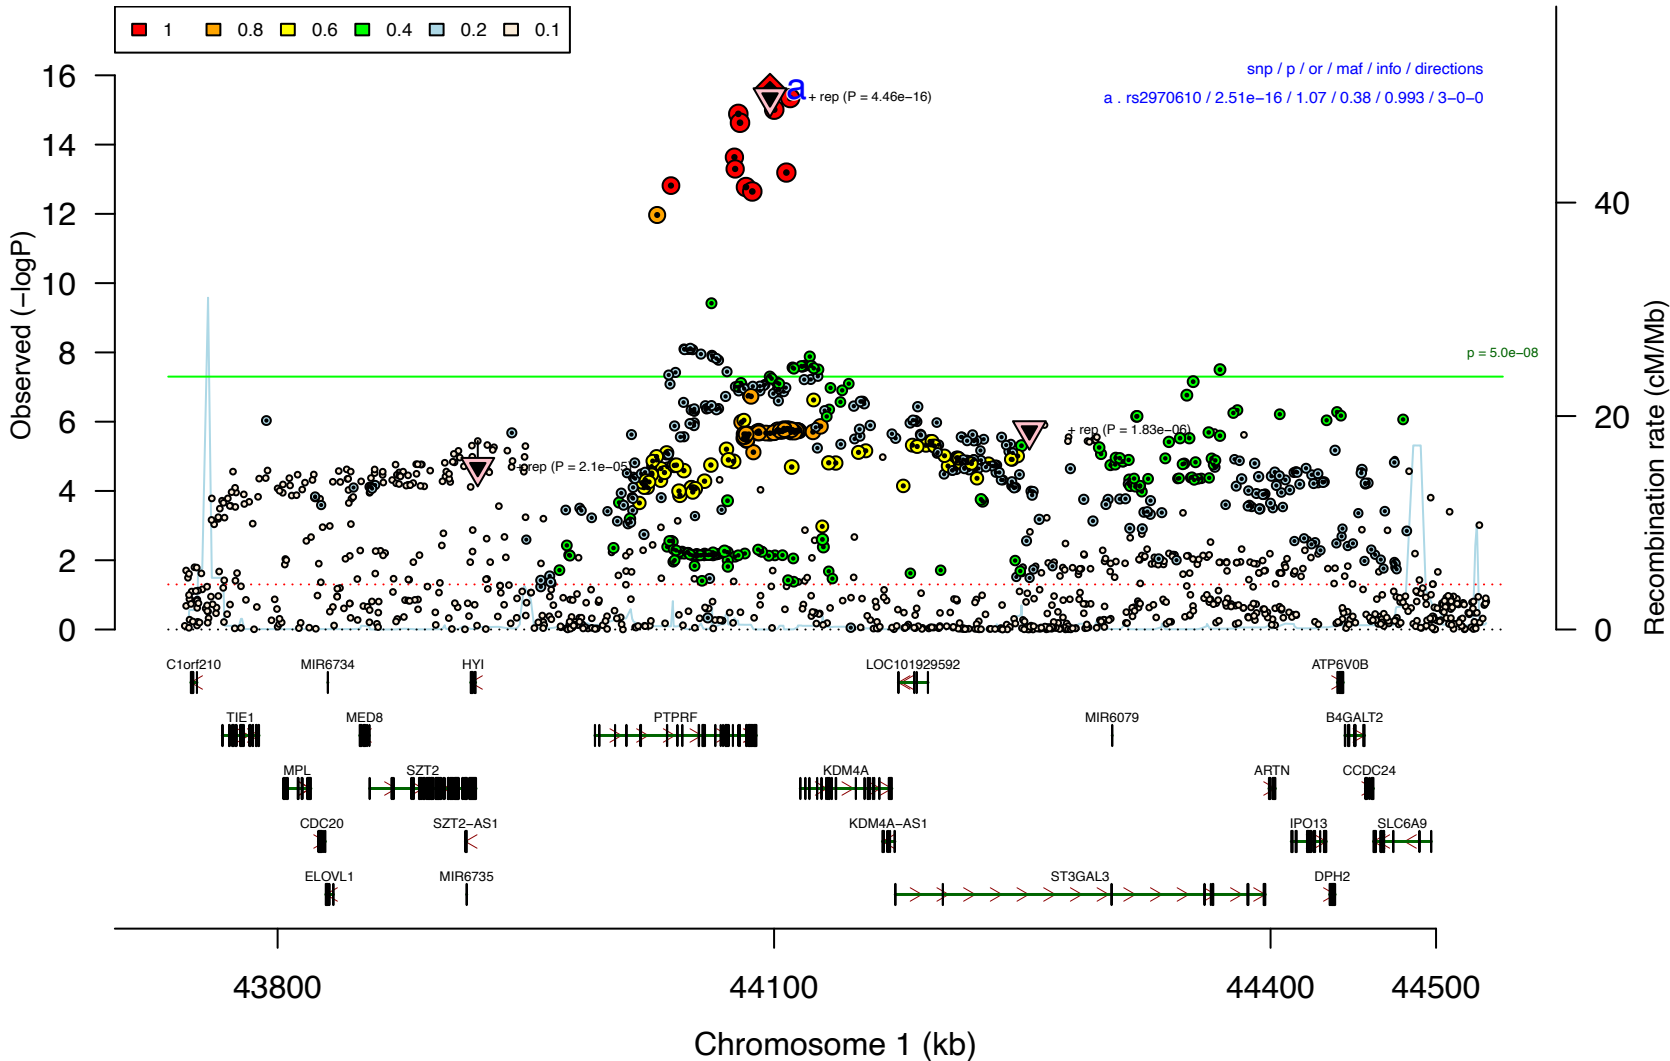

# PGC\_SCZ\_w3\_90\_0418b.26.chr2

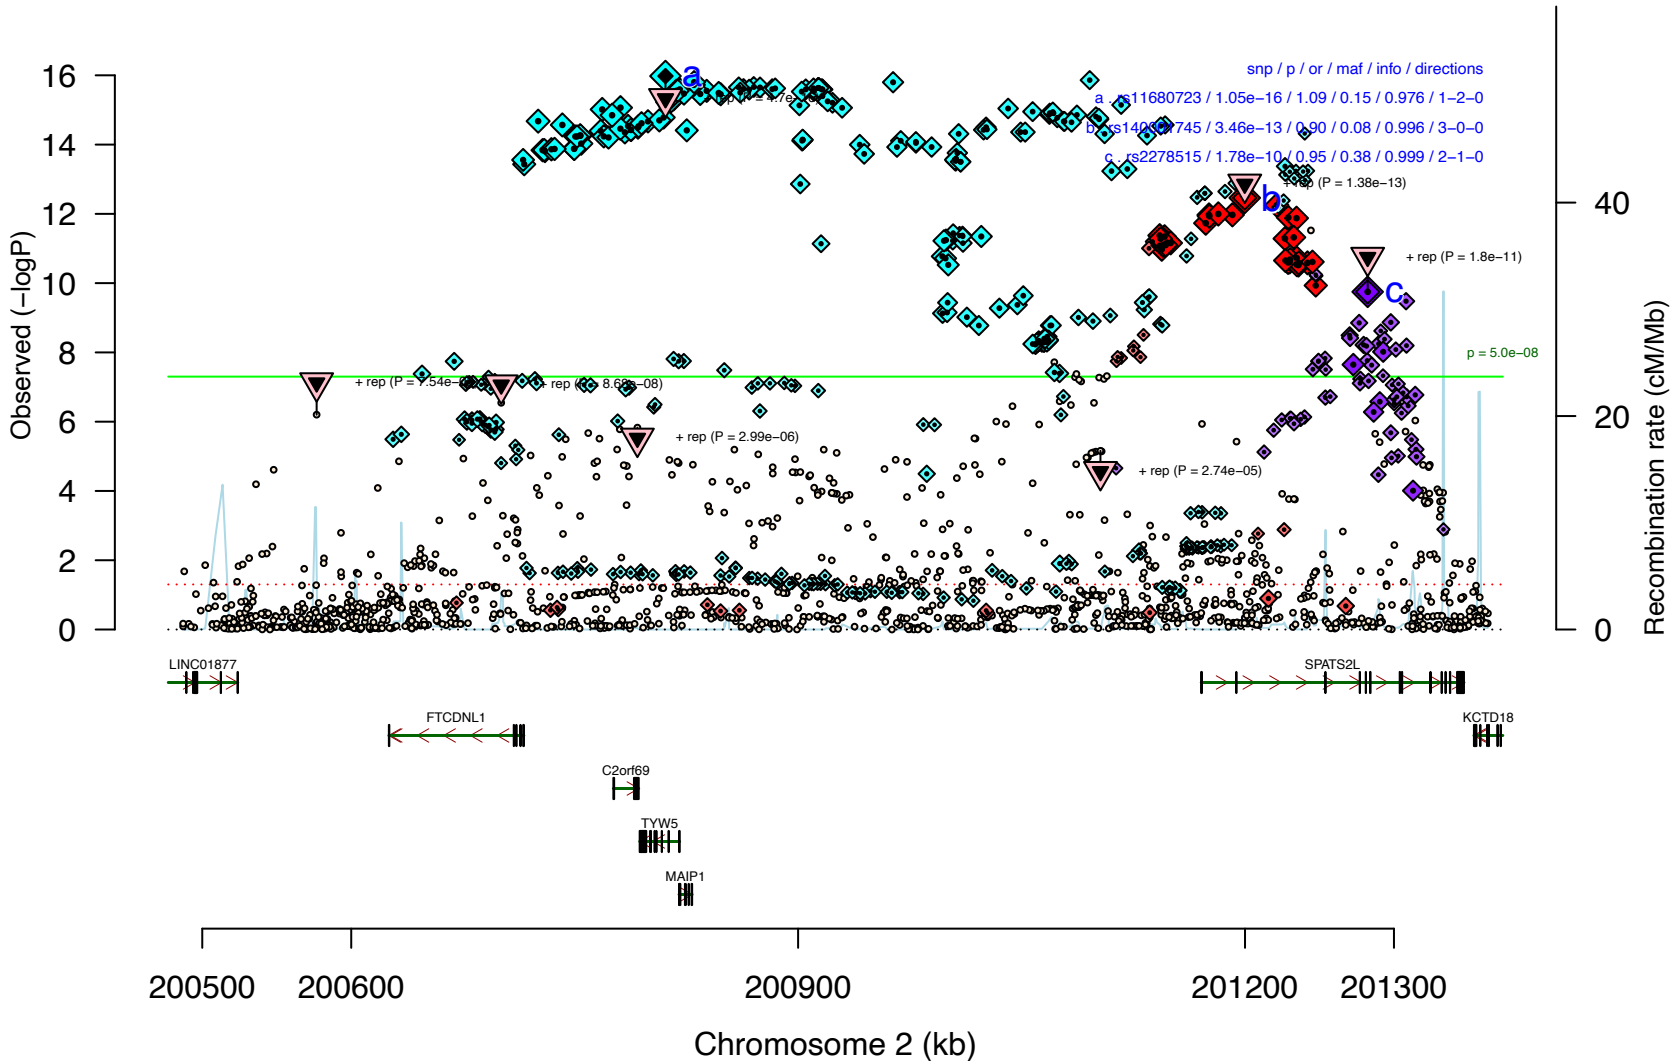

# PGC\_SCZ\_w3\_90\_0418b.27.chr18

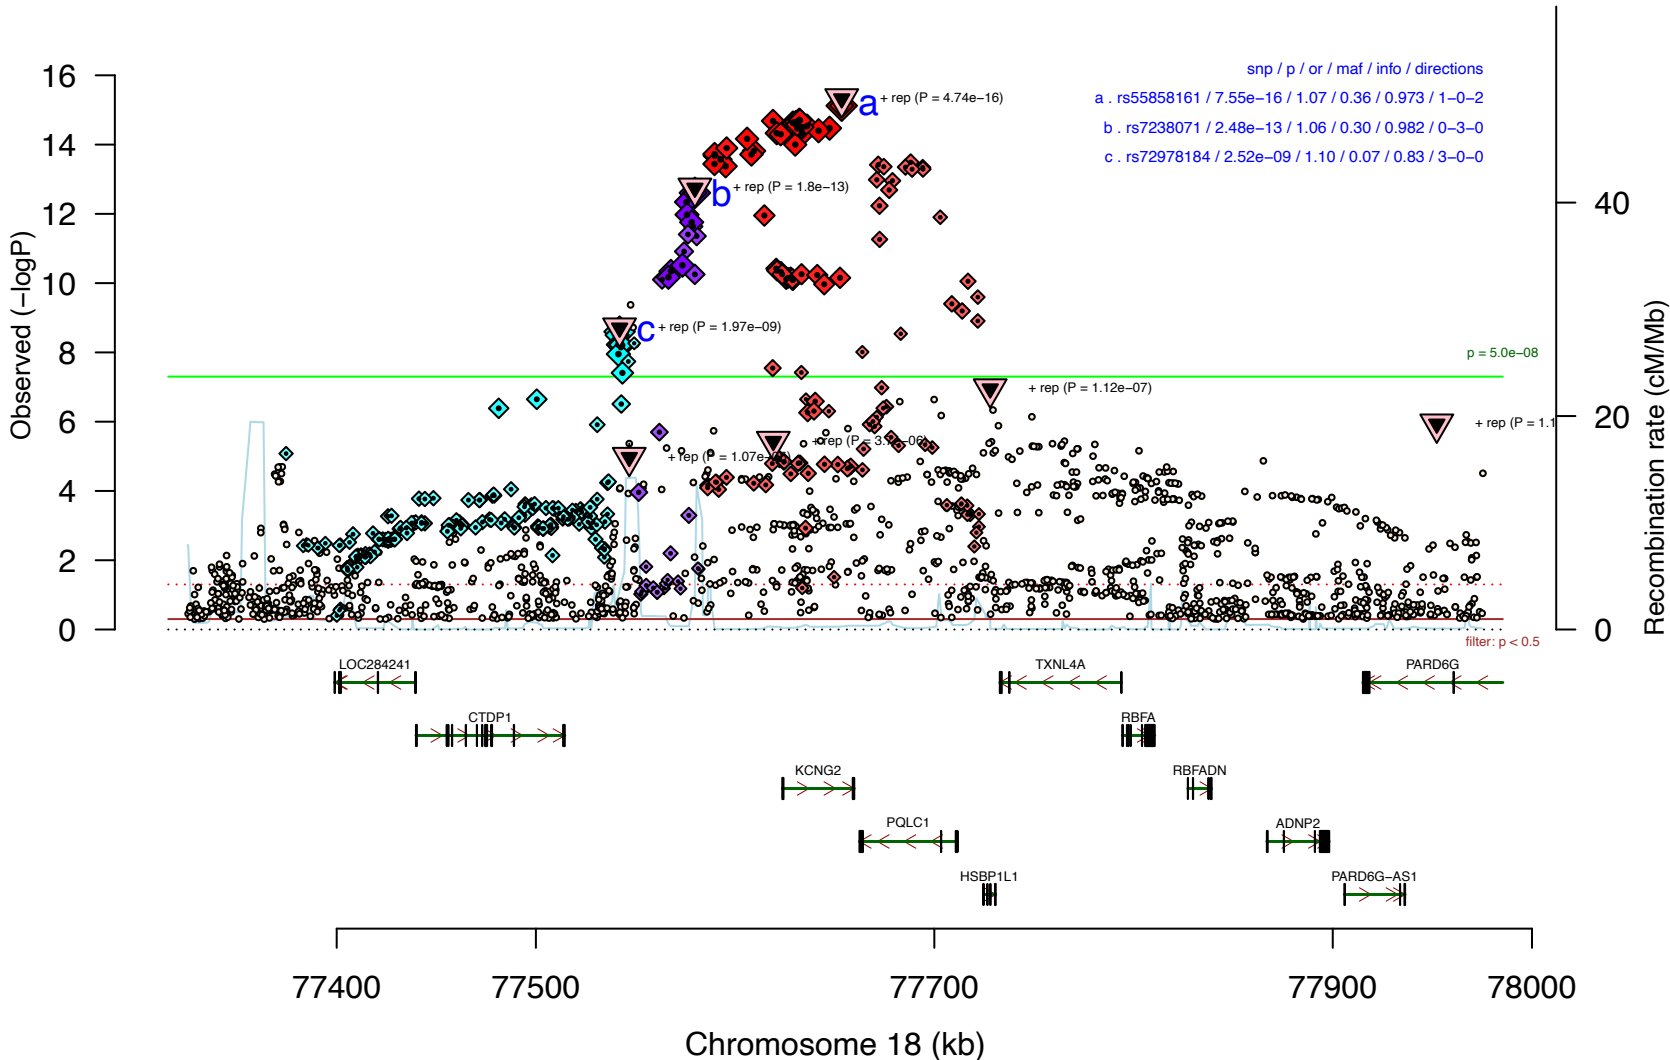

# PGC\_SCZ\_w3\_90\_0418b.28.chr16

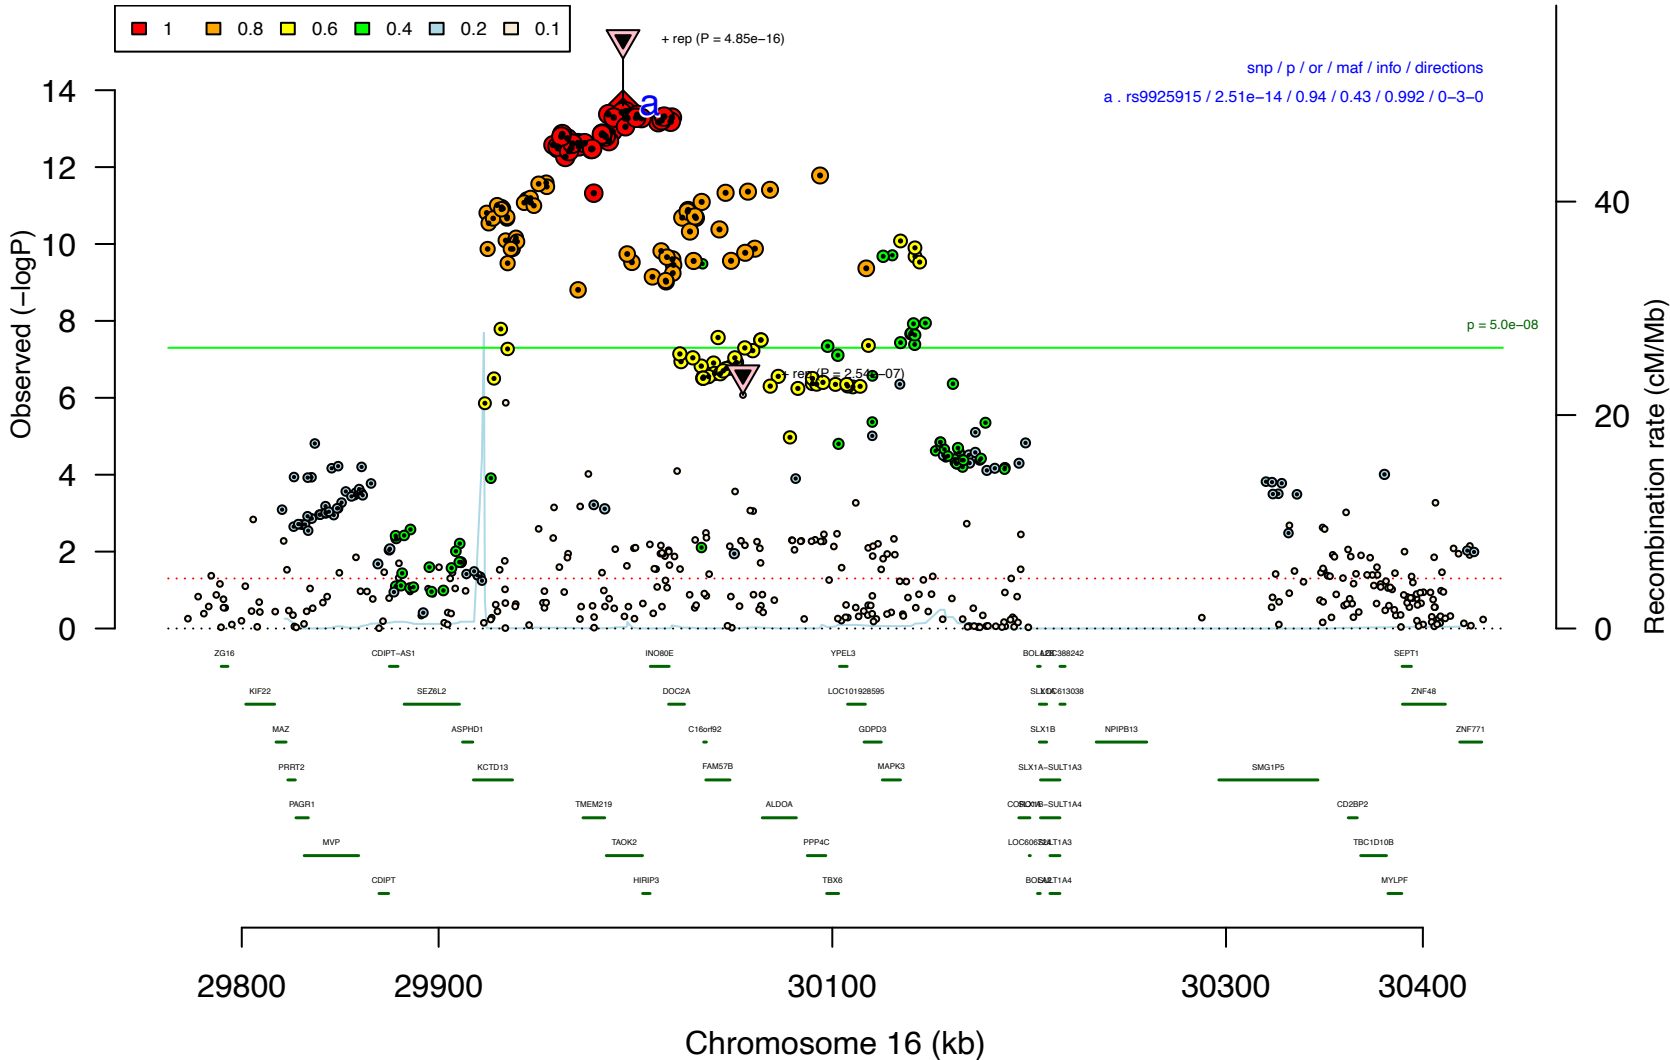



# PGC\_SCZ\_w3\_90\_0418b.29.chr19

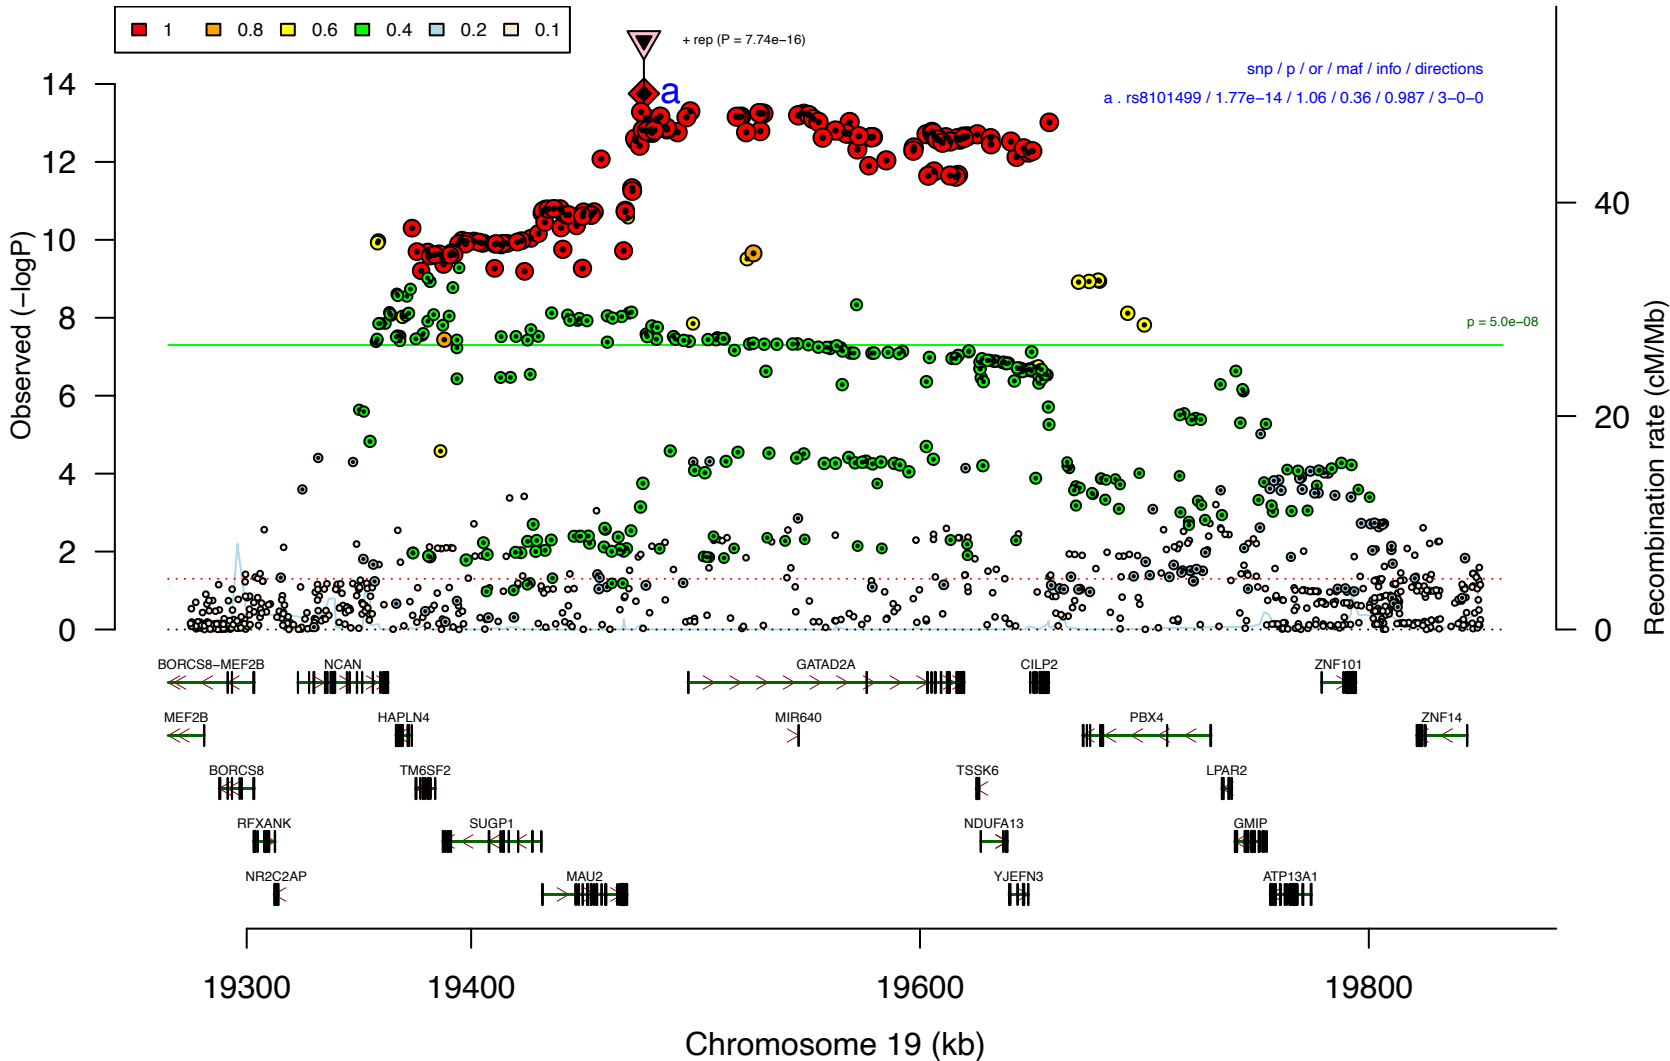

# PGC\_SCZ\_w3\_90\_0418b.30.chr4

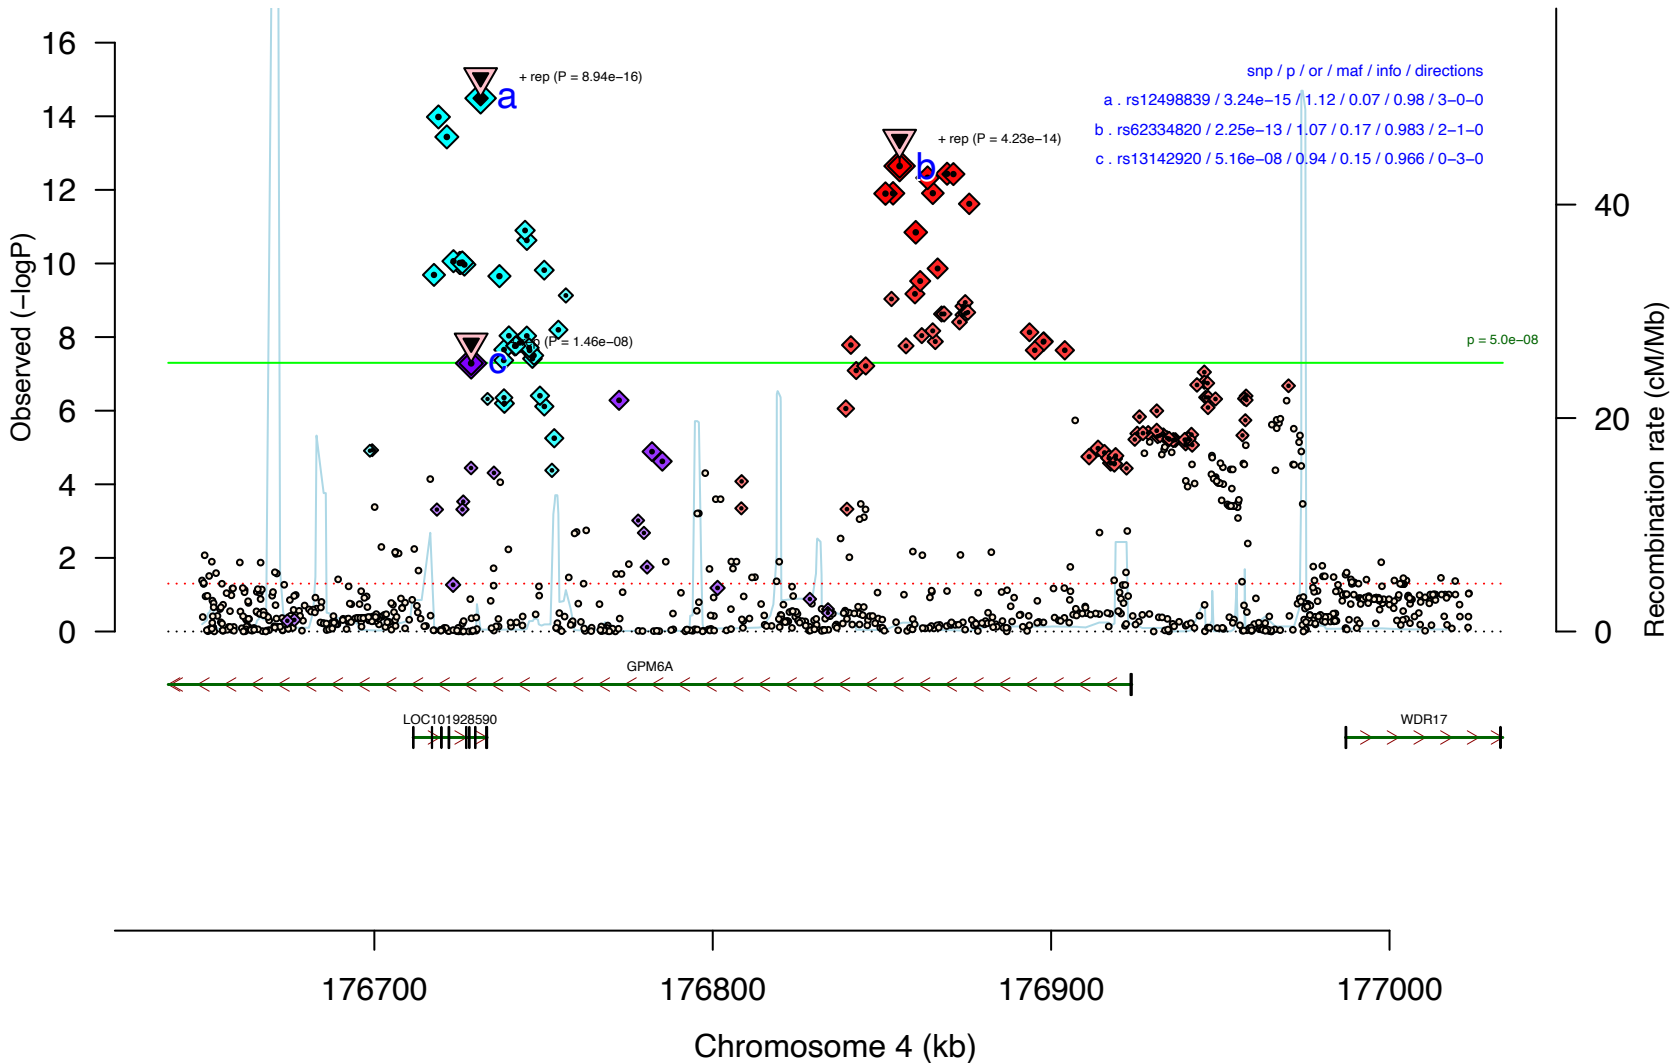

# PGC\_SCZ\_w3\_90\_0418b.31.chr1

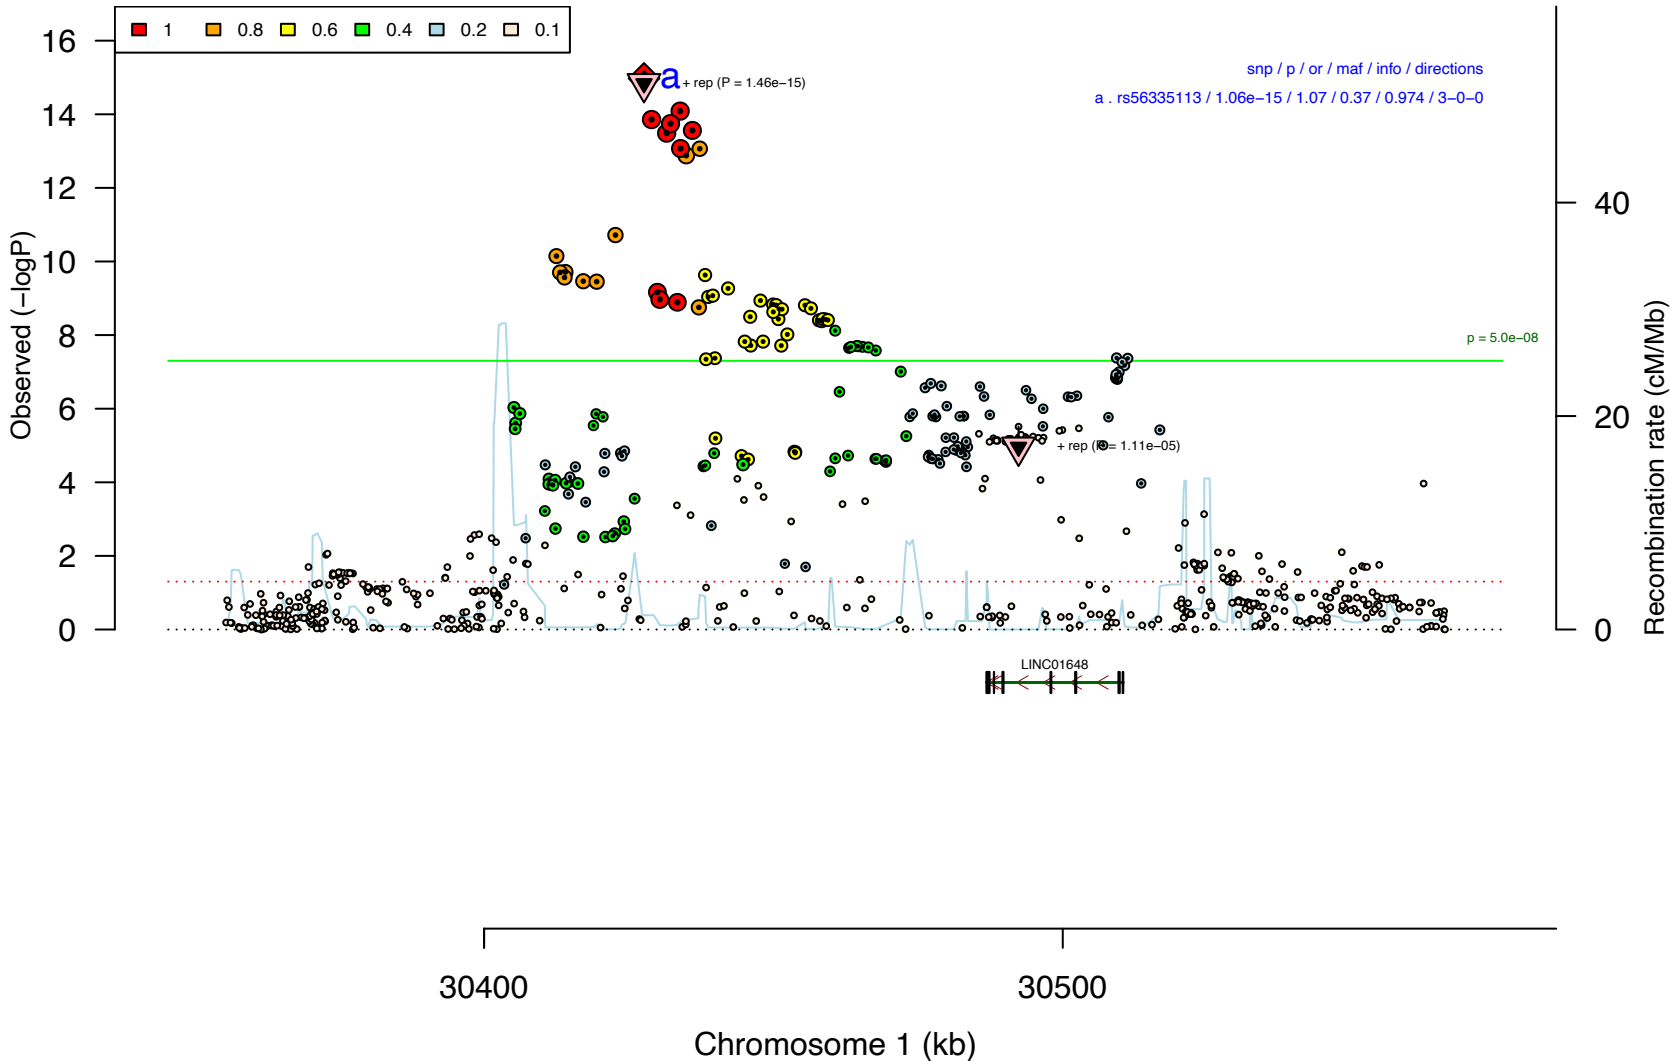

# PGC\_SCZ\_w3\_90\_0418b.32.chr2

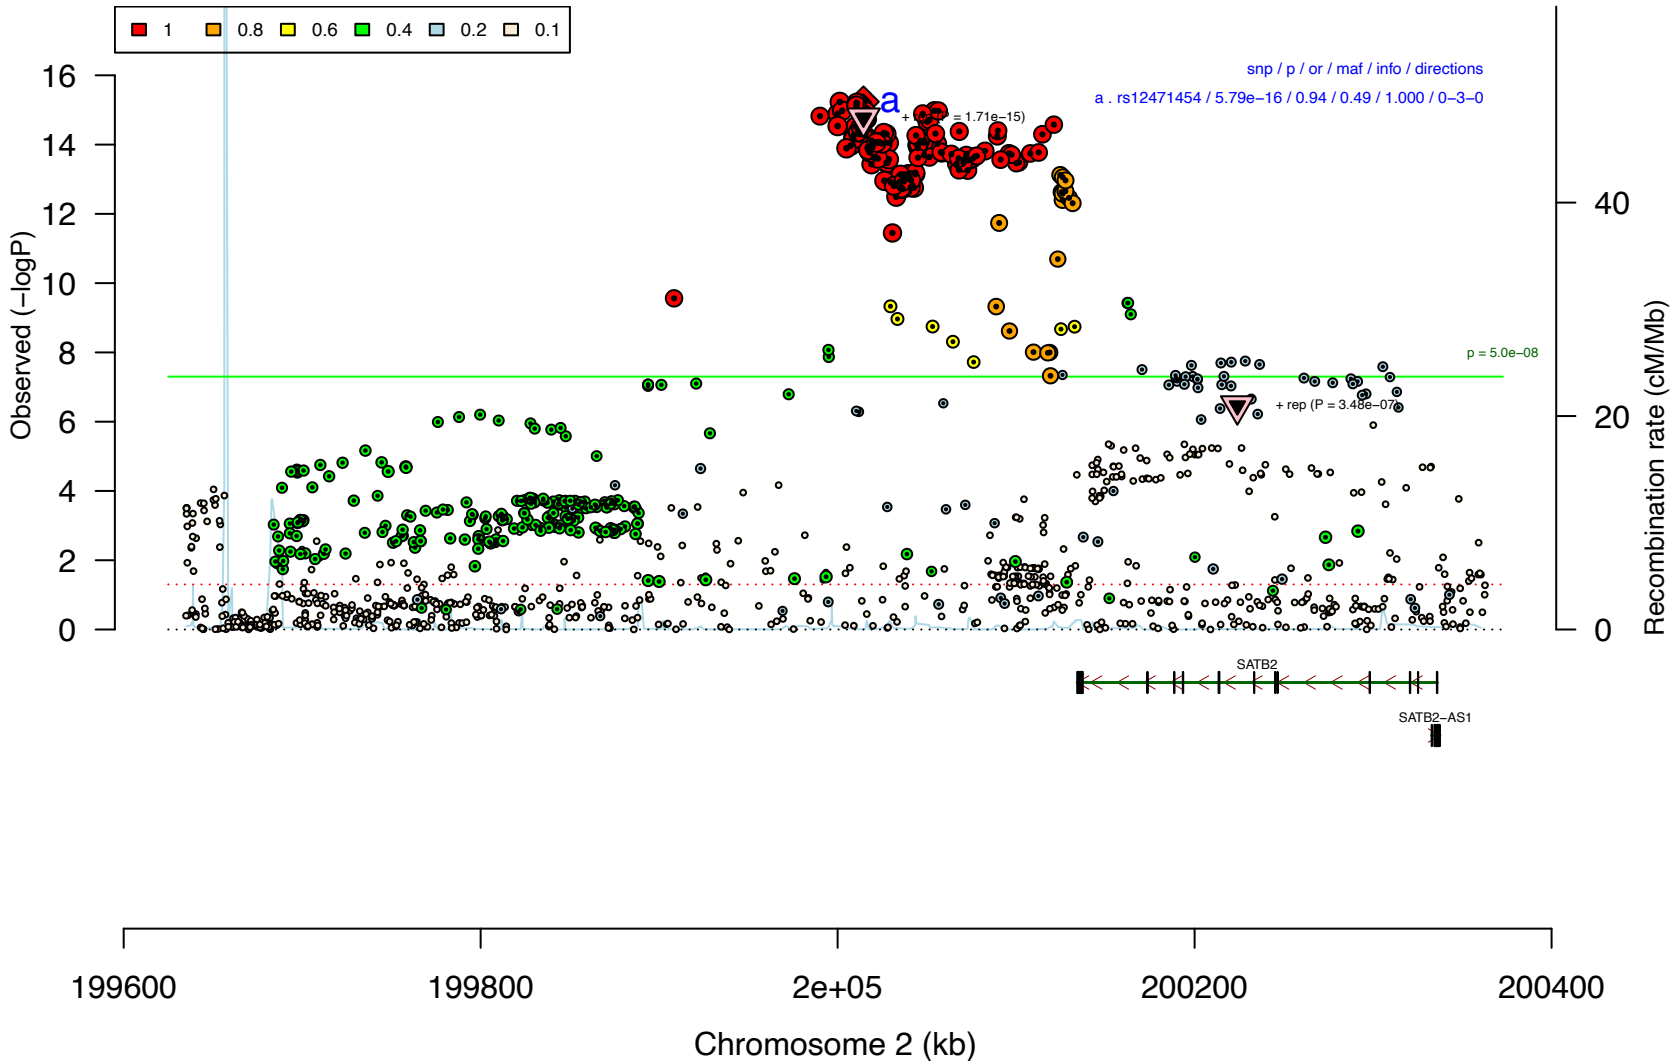

# PGC\_SCZ\_w3\_90\_0418b.33.chr1

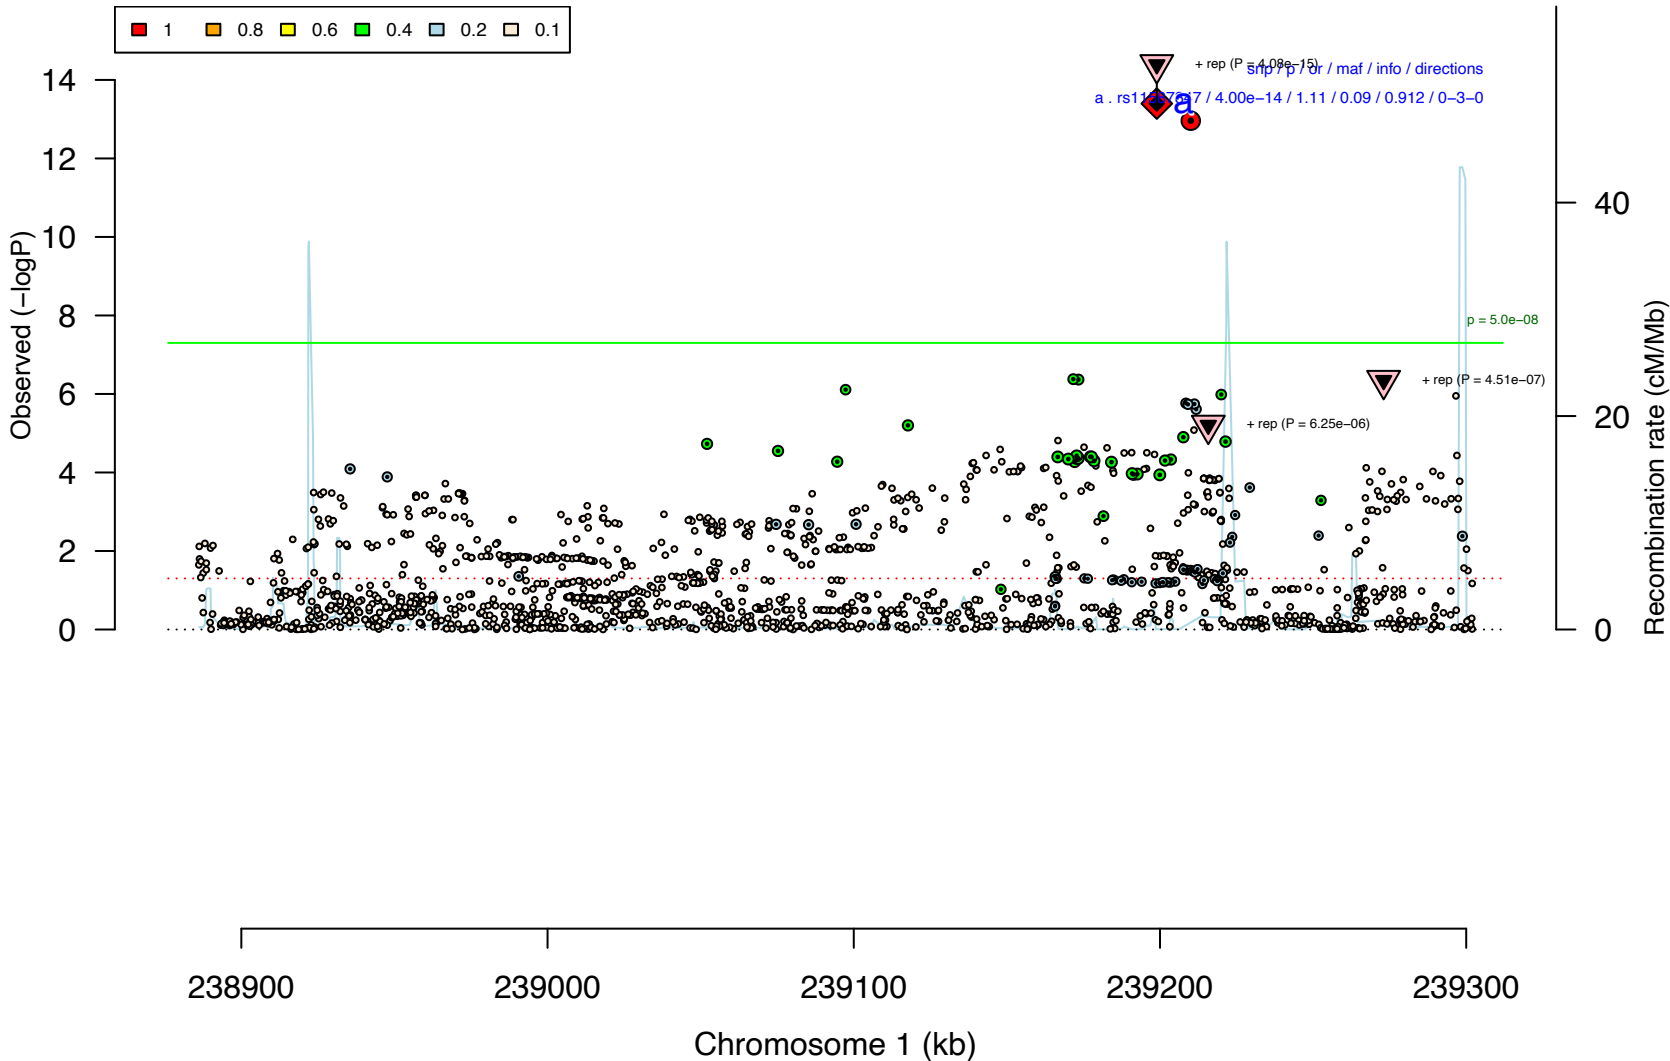

# PGC\_SCZ\_w3\_90\_0418b.34.chr12

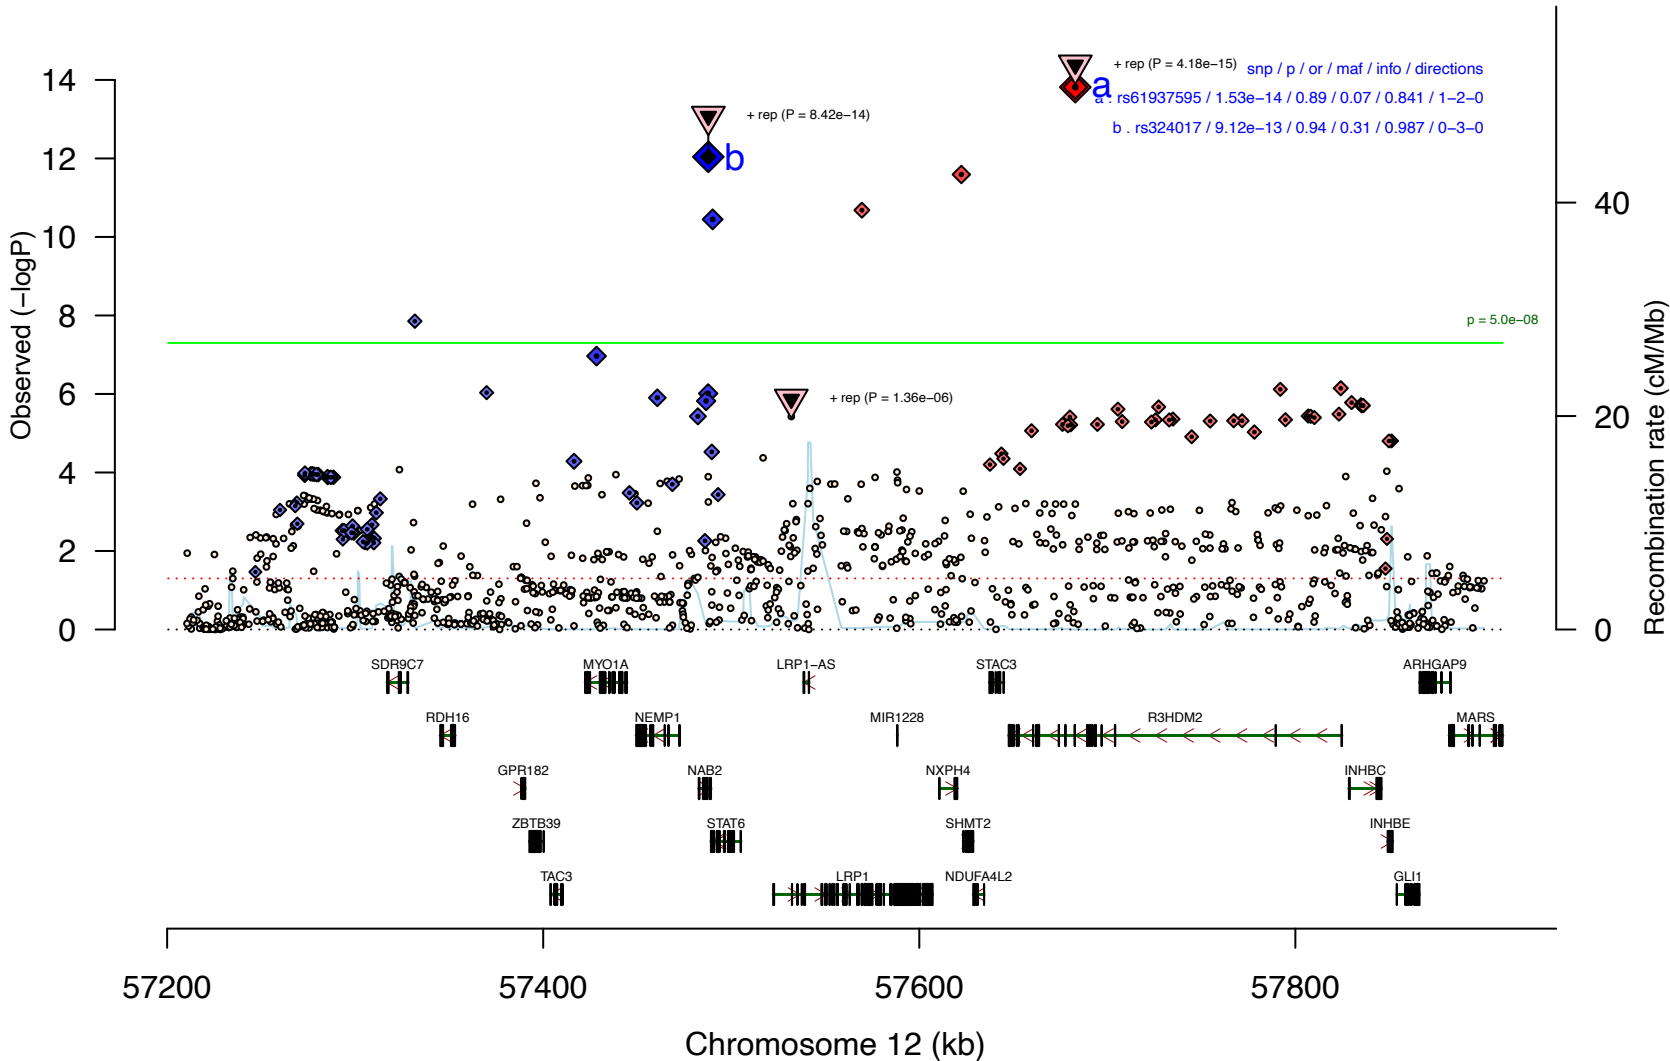

# PGC\_SCZ\_w3\_90\_0418b.35.chr15

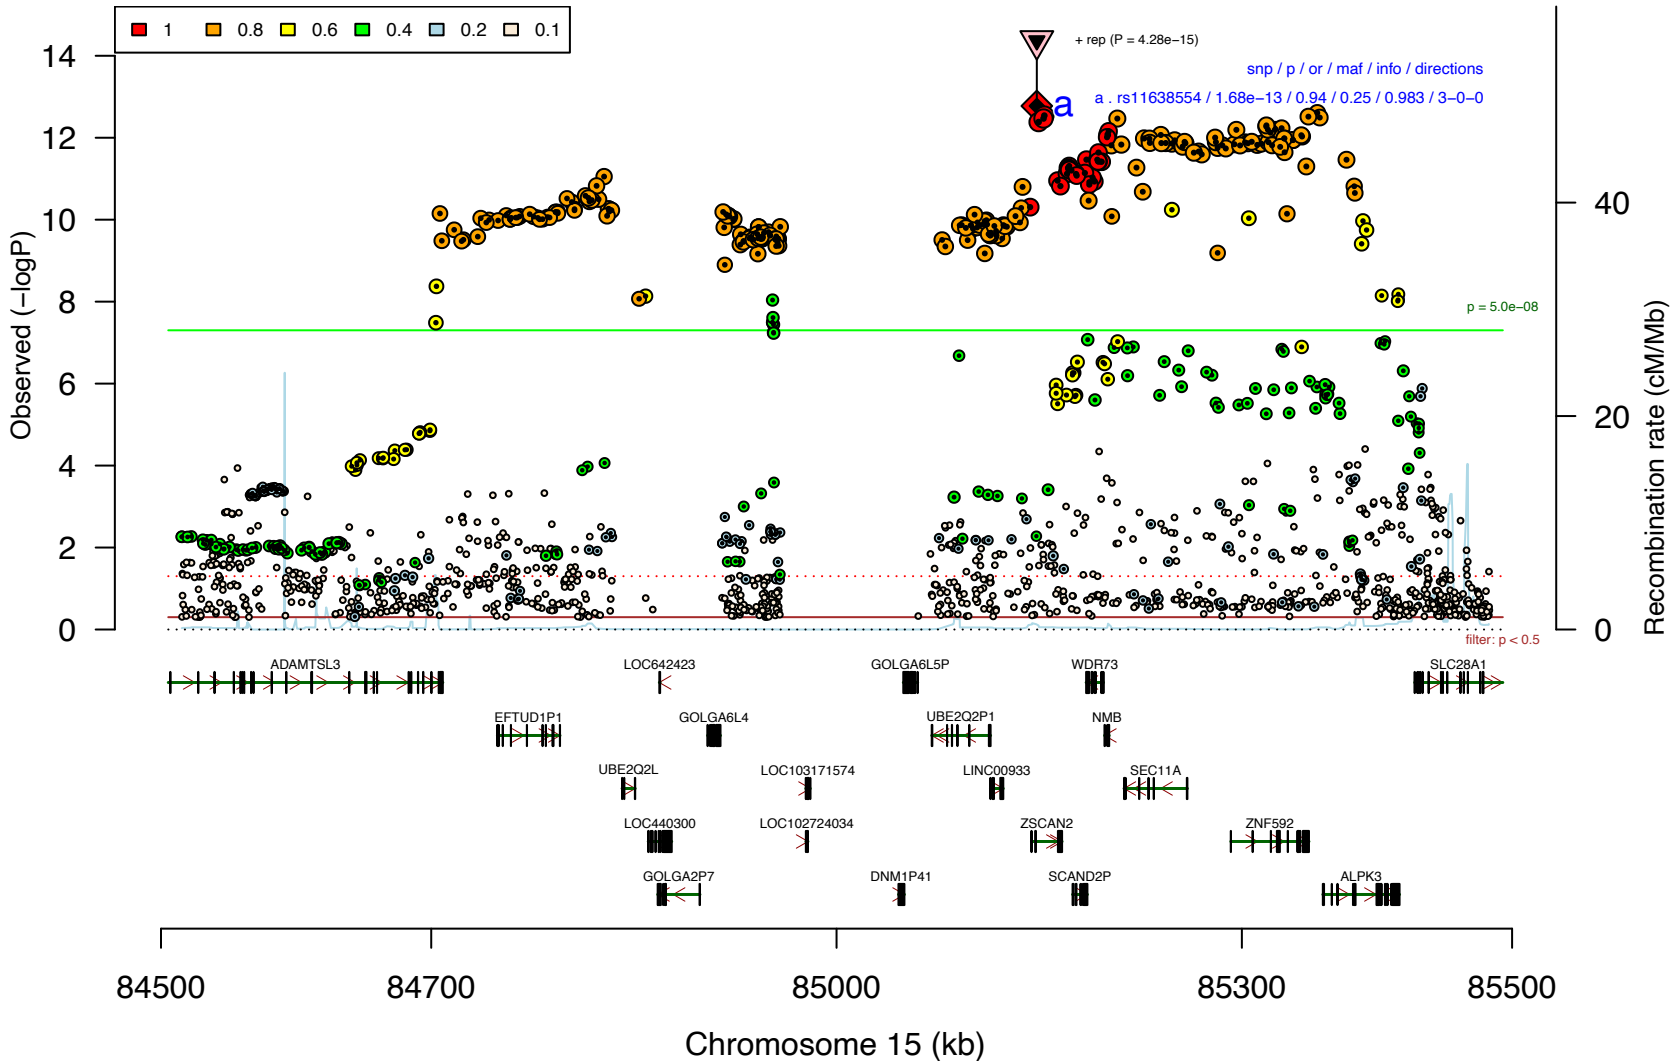

# PGC\_SCZ\_w3\_90\_0418b.36.chr14

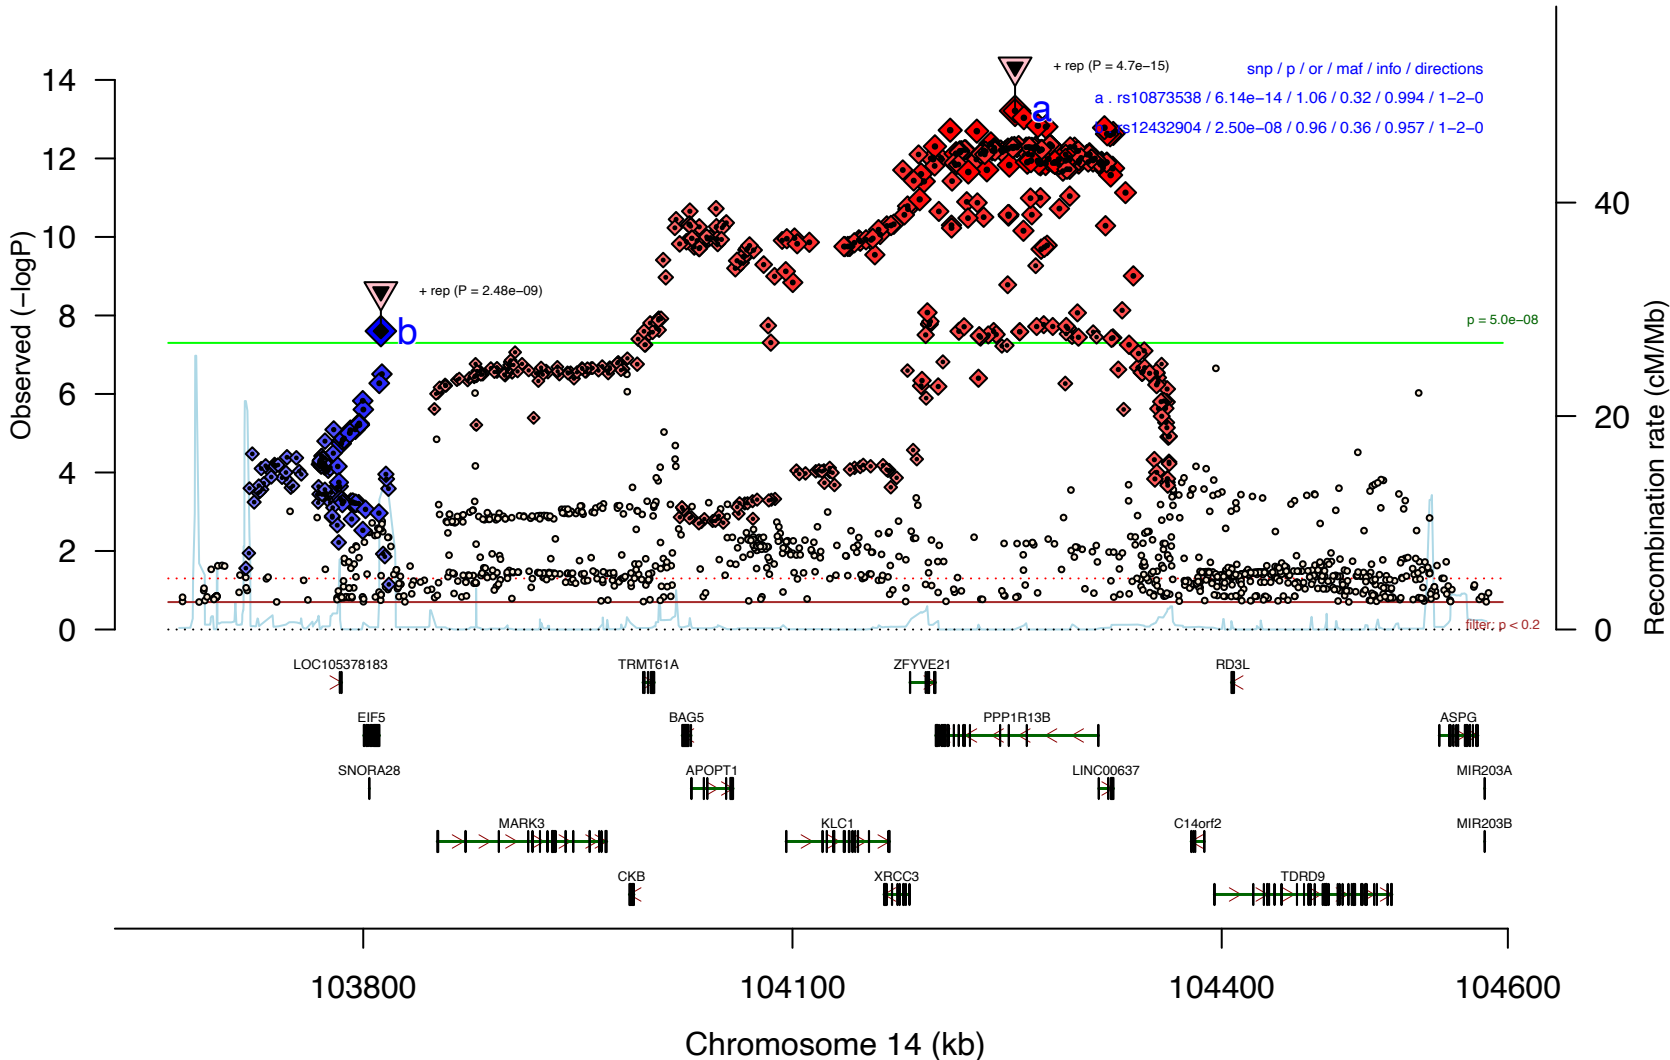



# PGC\_SCZ\_w3\_90\_0418b.37.chr22

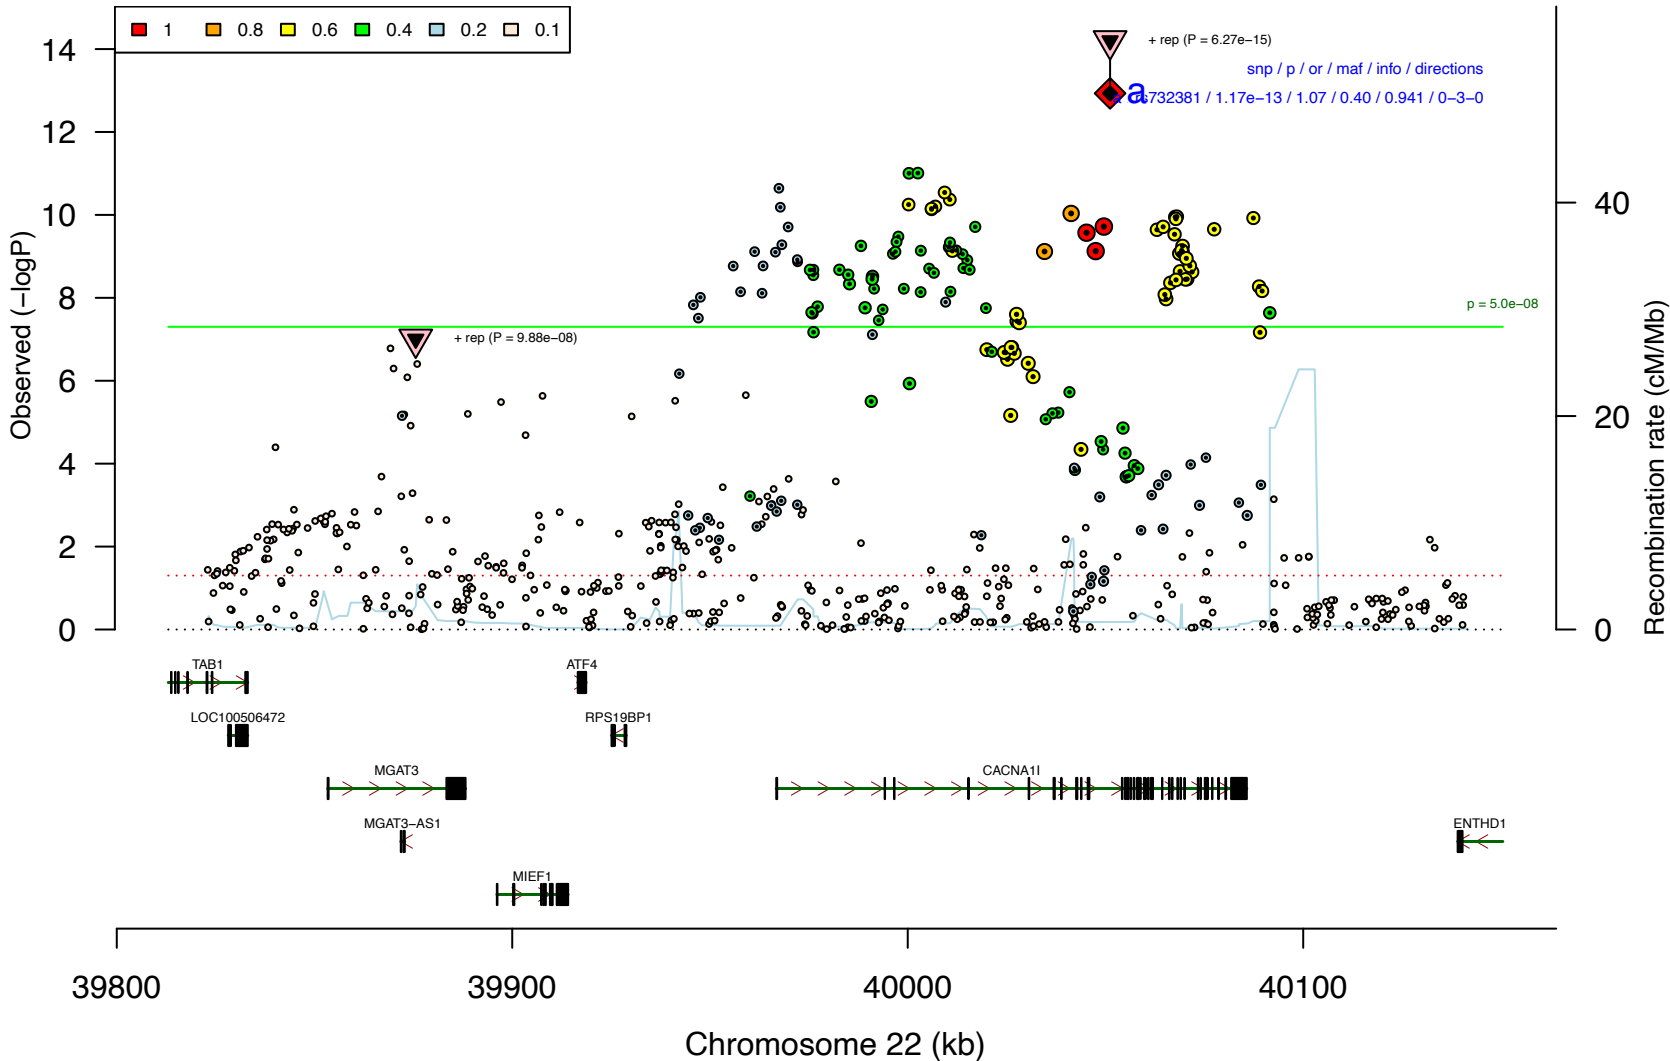

# PGC\_SCZ\_w3\_90\_0418b.38.chr7

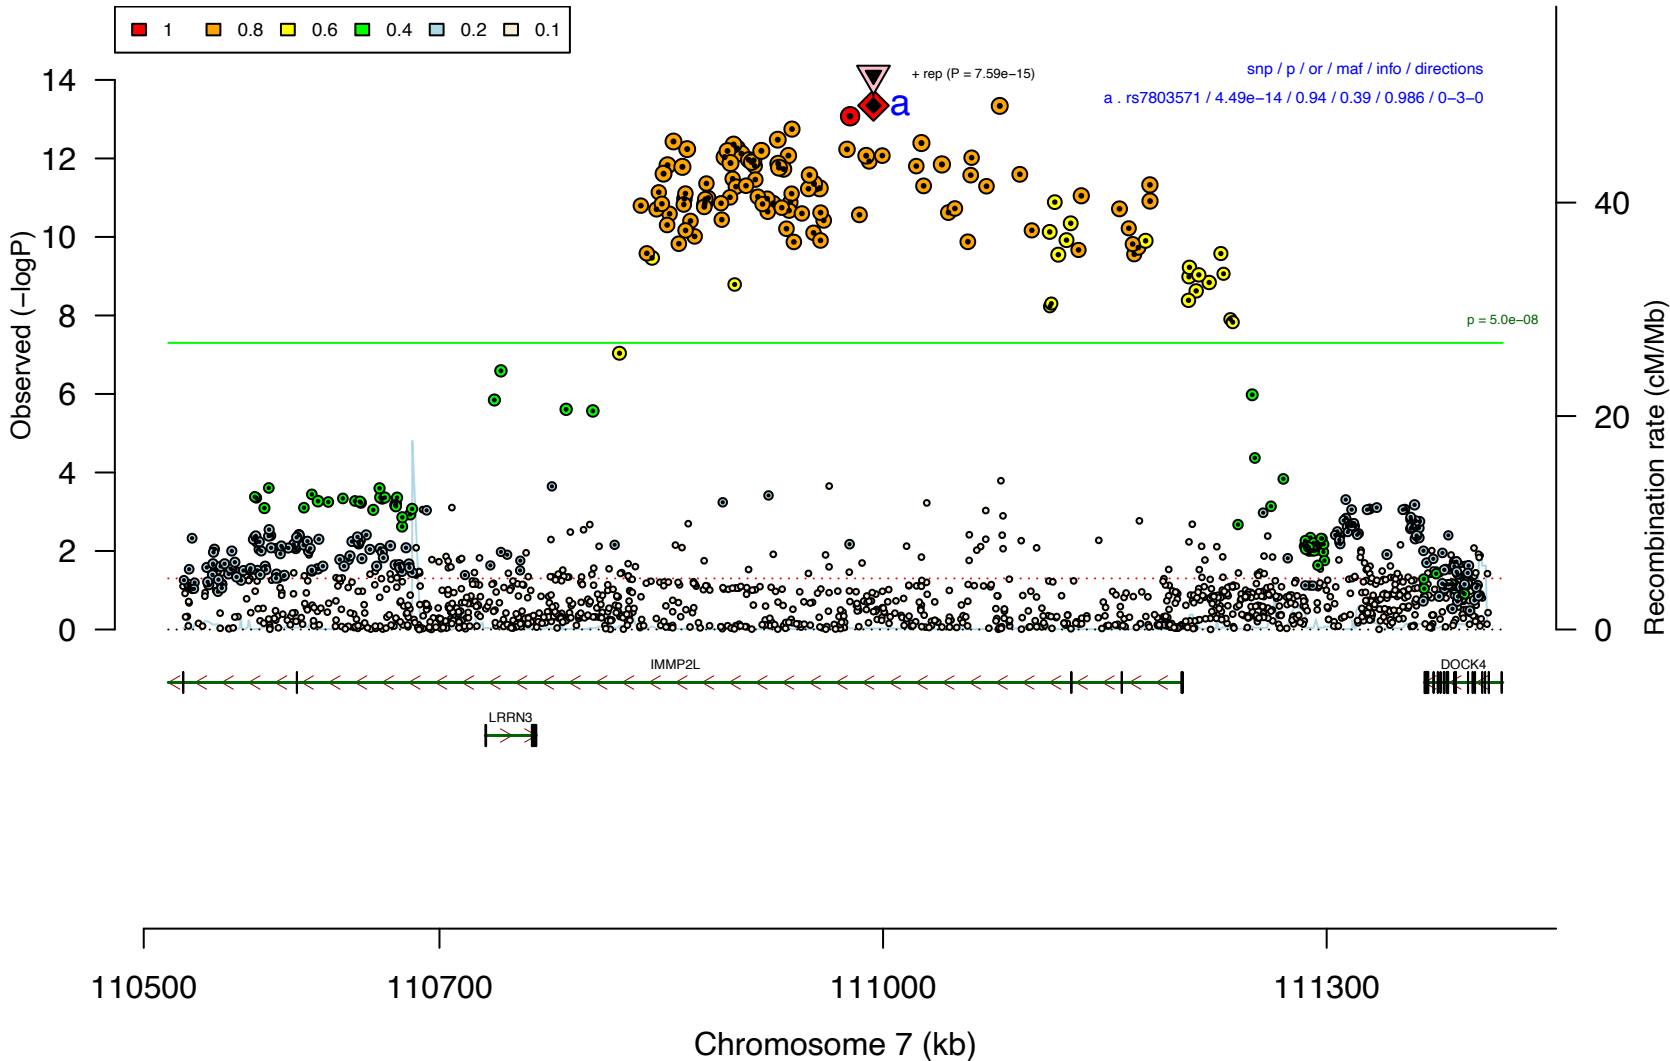

# PGC\_SCZ\_w3\_90\_0418b.39.chr3

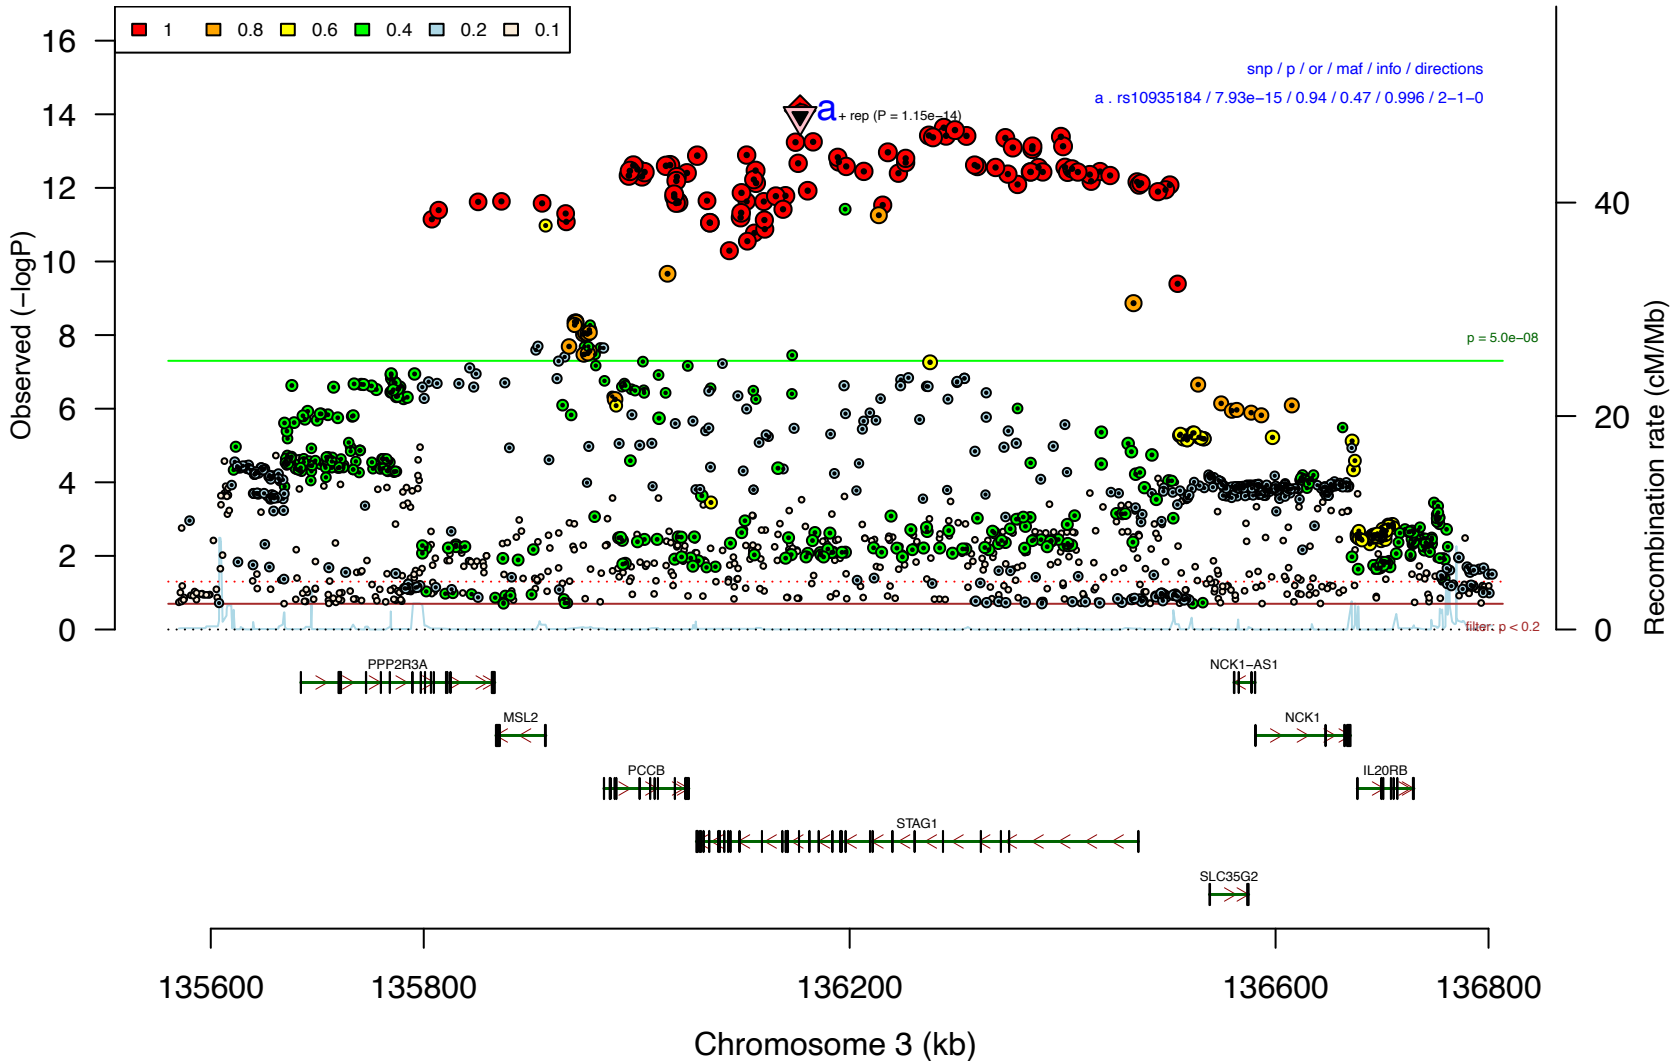

# PGC\_SCZ\_w3\_90\_0418b.40.chr5

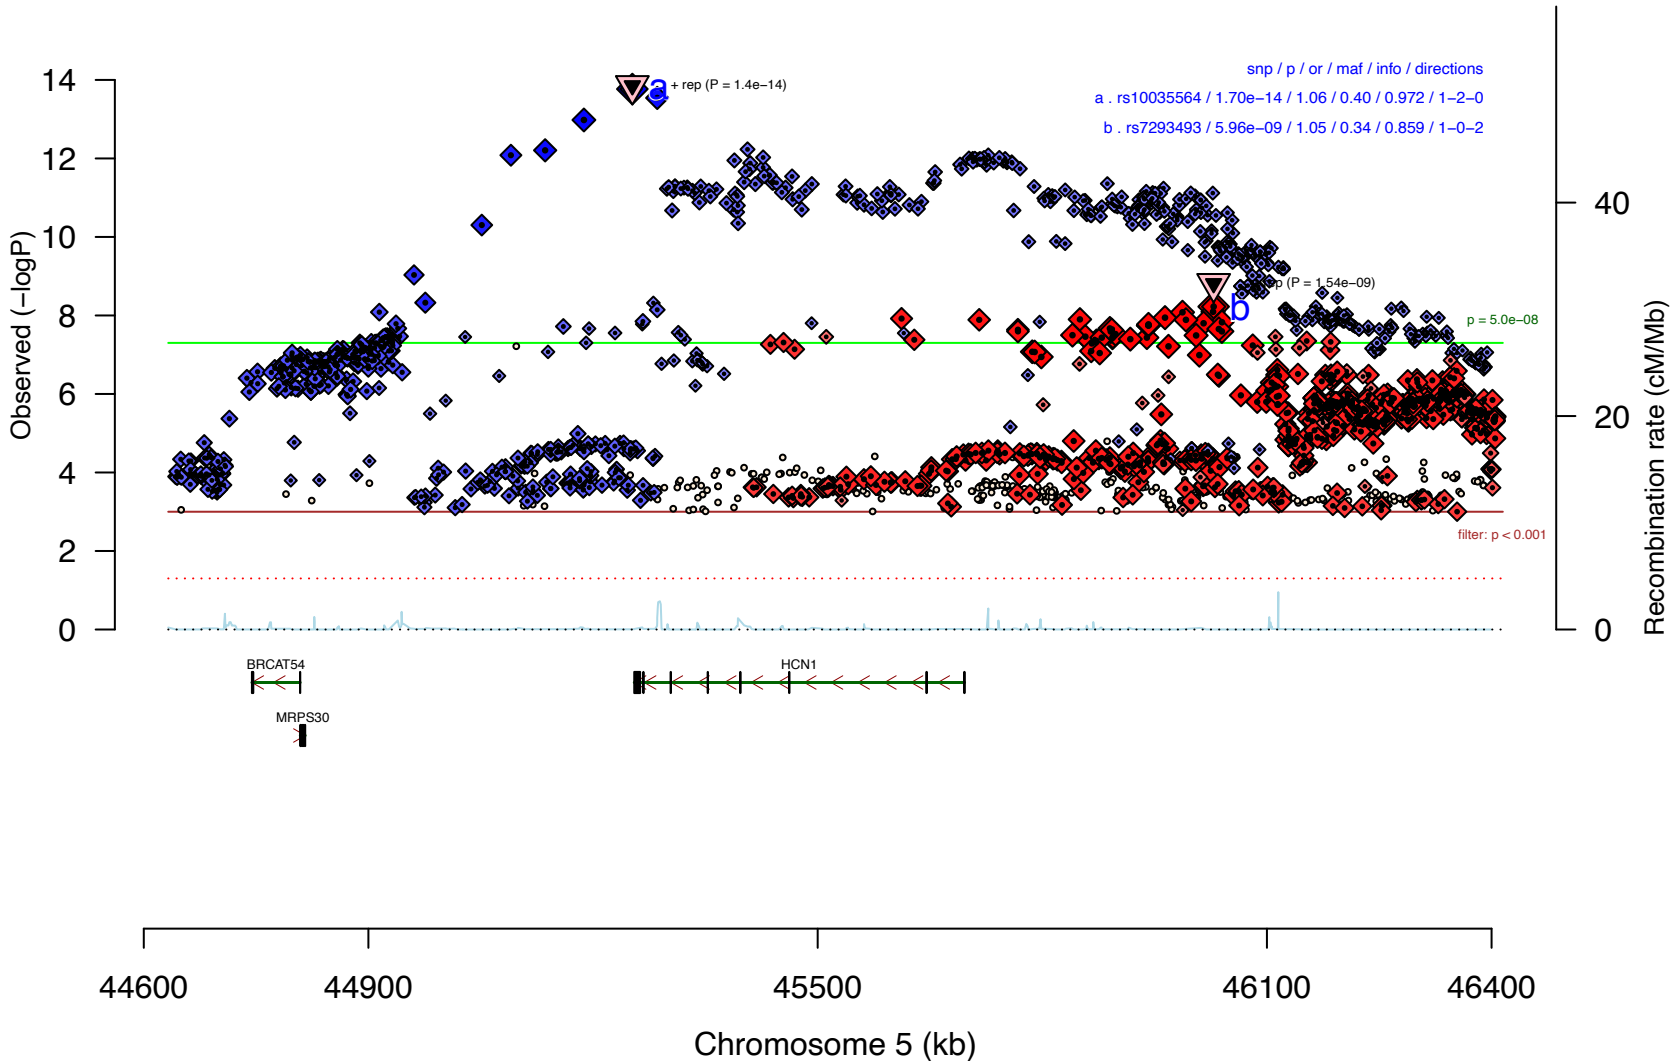

# PGC\_SCZ\_w3\_90\_0418b.41.chr19

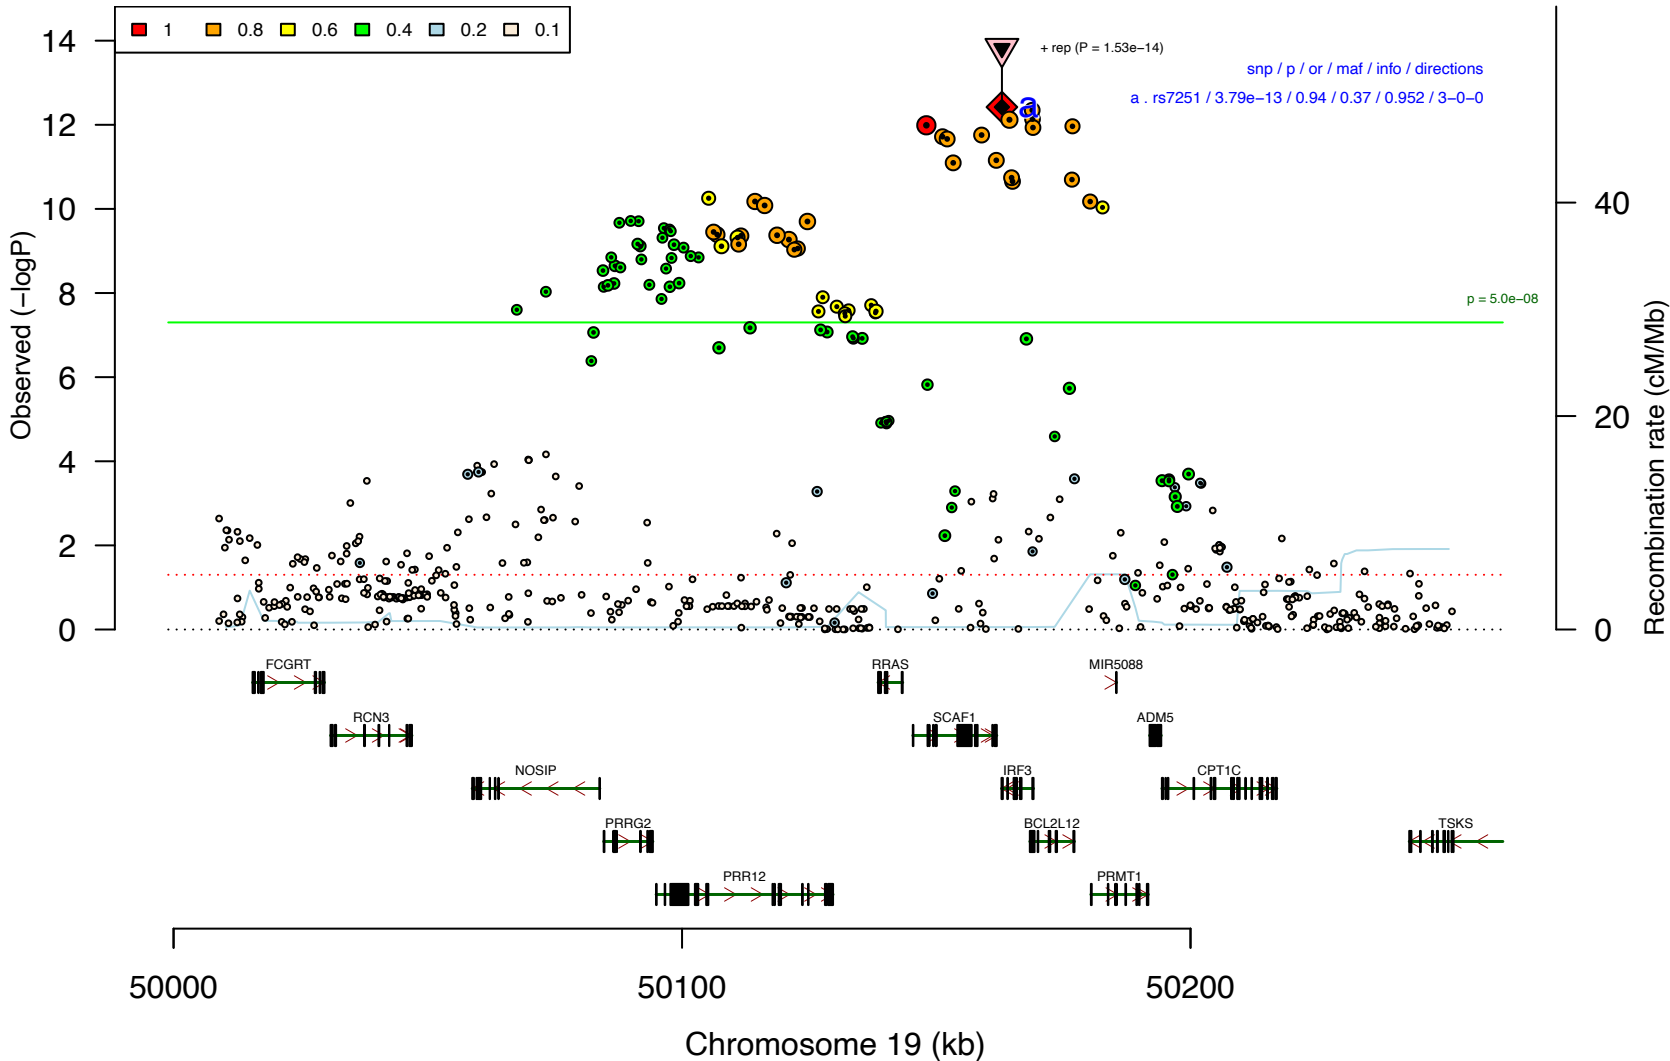

# PGC\_SCZ\_w3\_90\_0418b.42.chr2

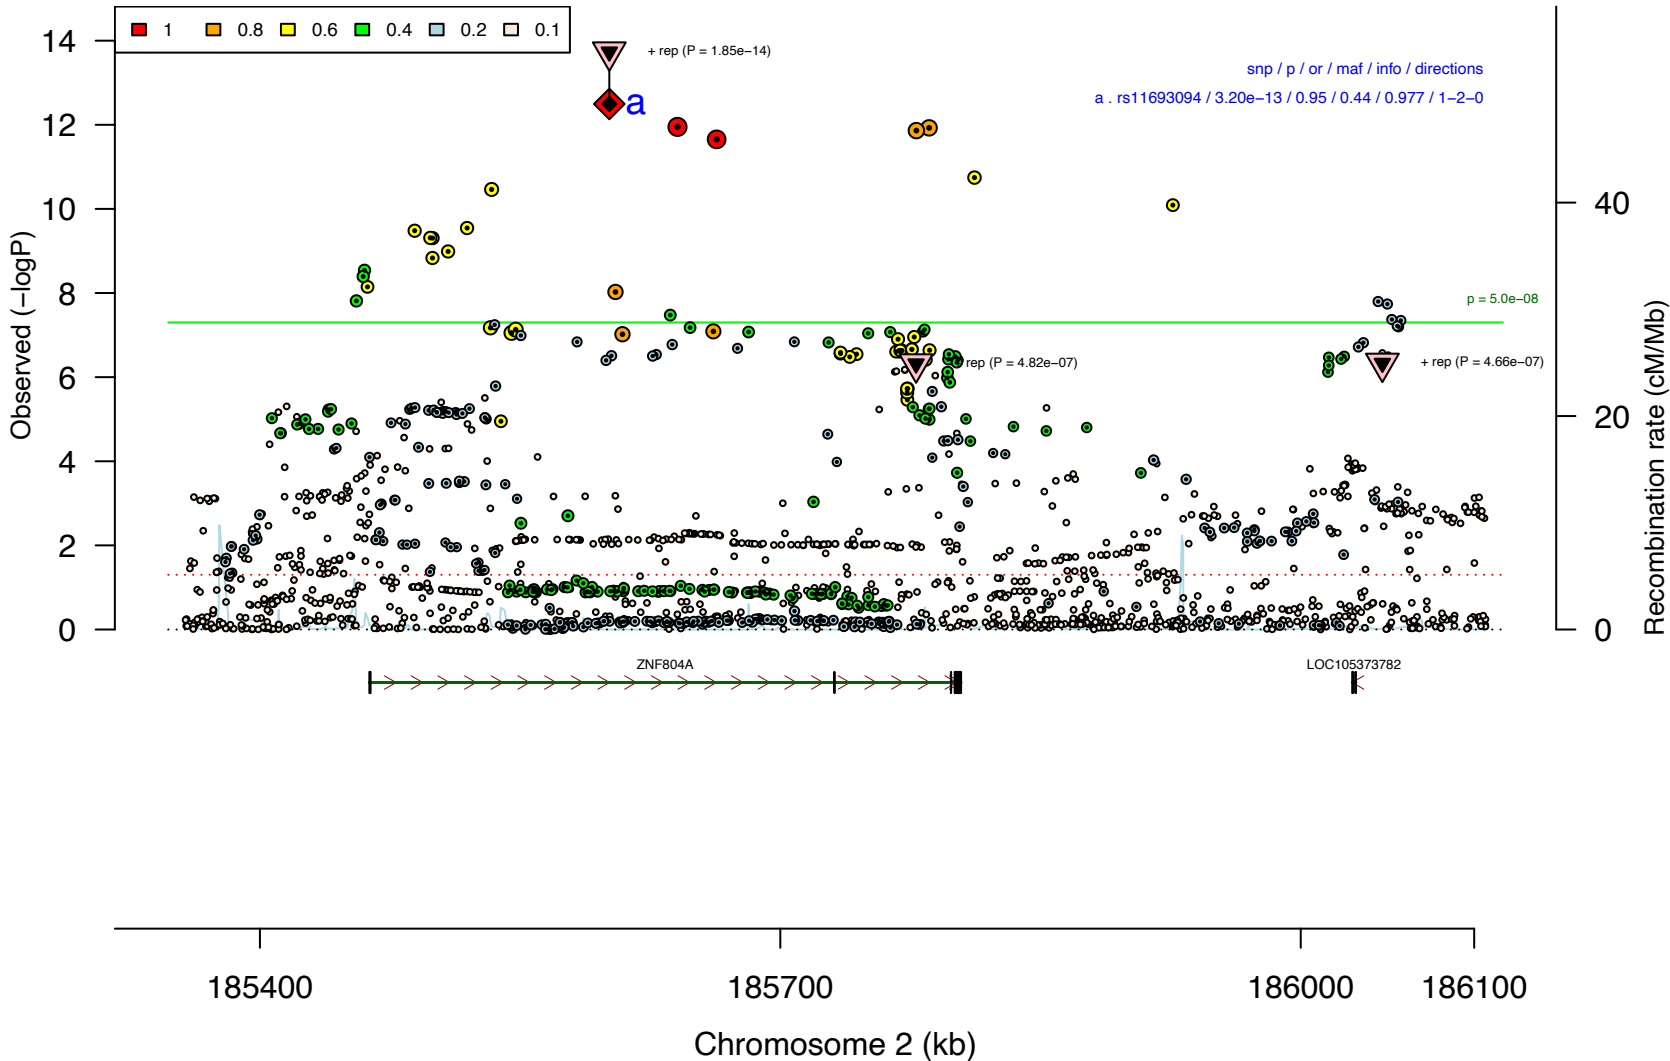

# PGC\_SCZ\_w3\_90\_0418b.43.chr11

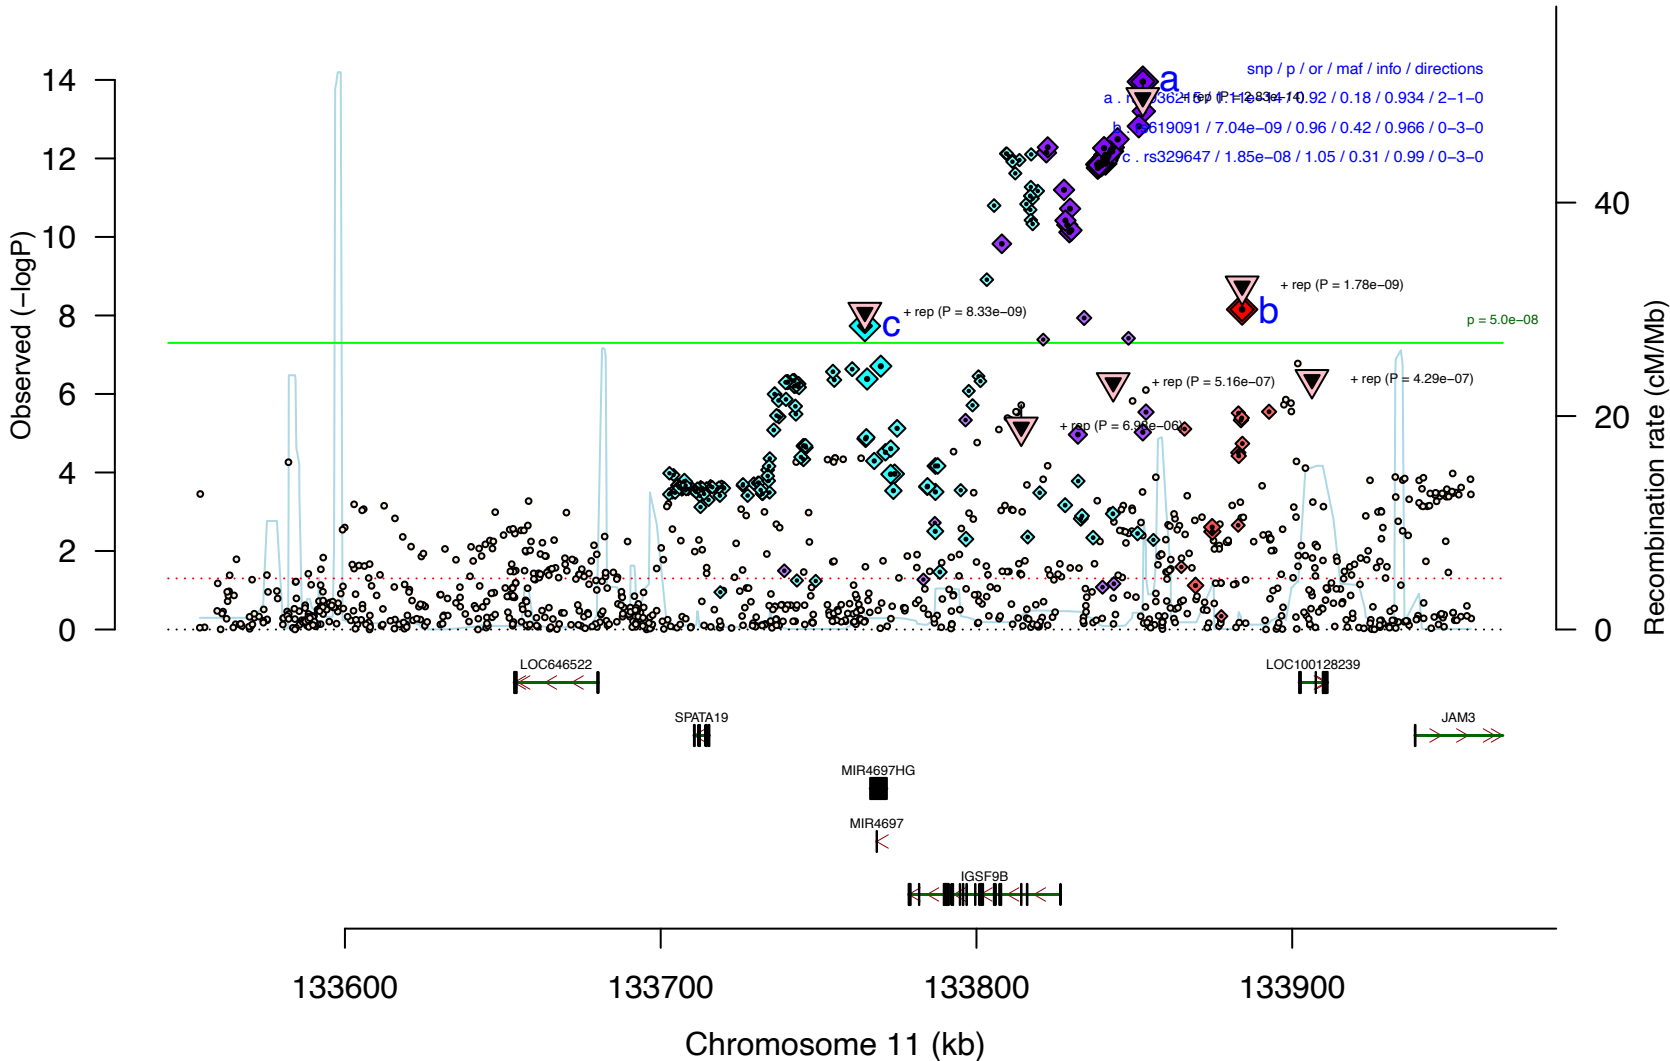

# PGC\_SCZ\_w3\_90\_0418b.44.chr2

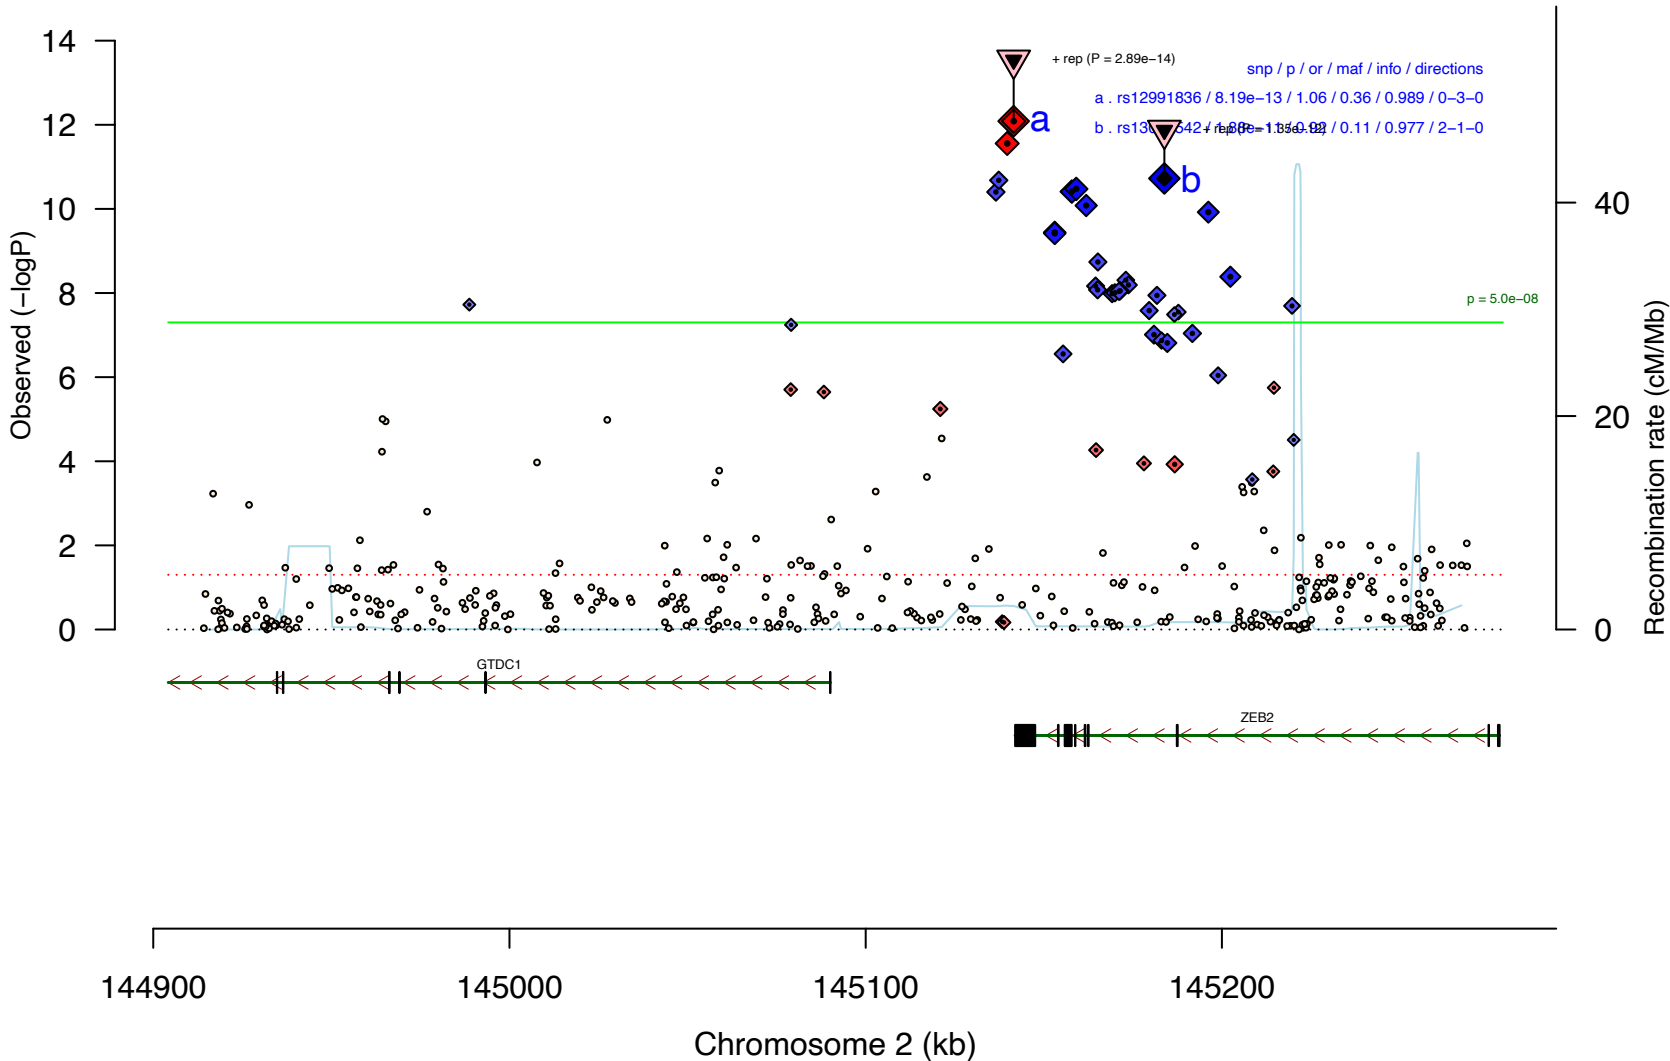



# PGC\_SCZ\_w3\_90\_0418b.45.chr11

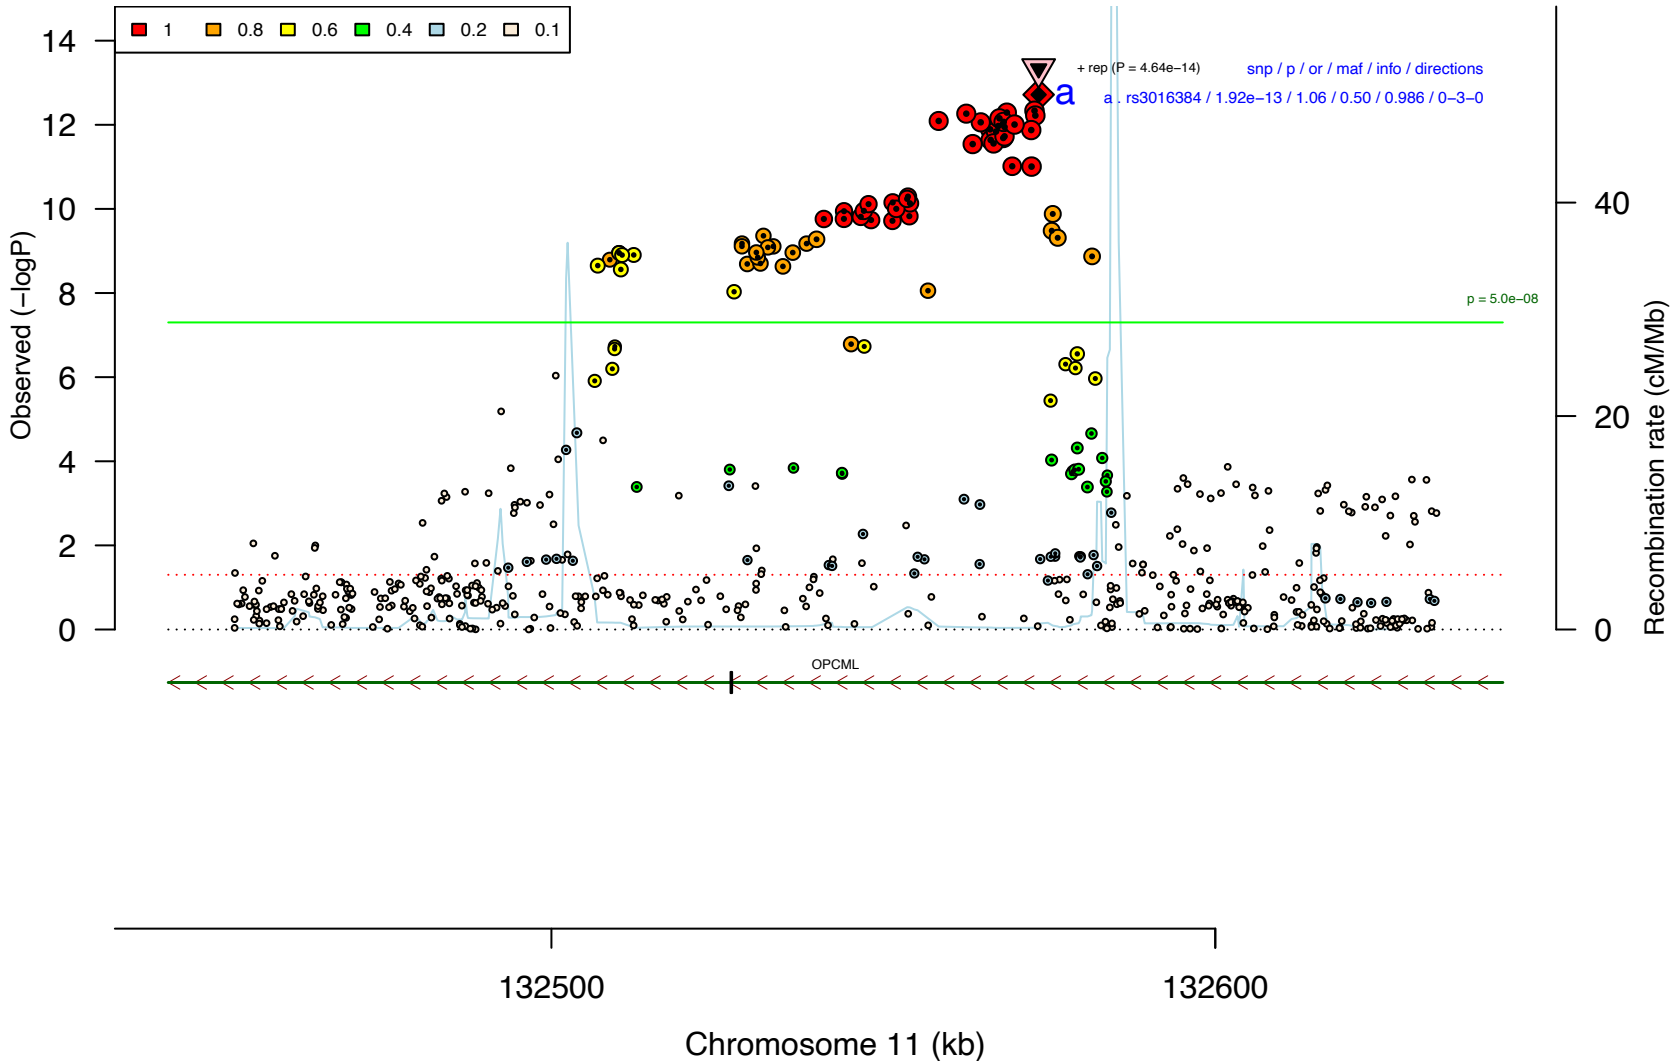

# PGC\_SCZ\_w3\_90\_0418b.46.chr1

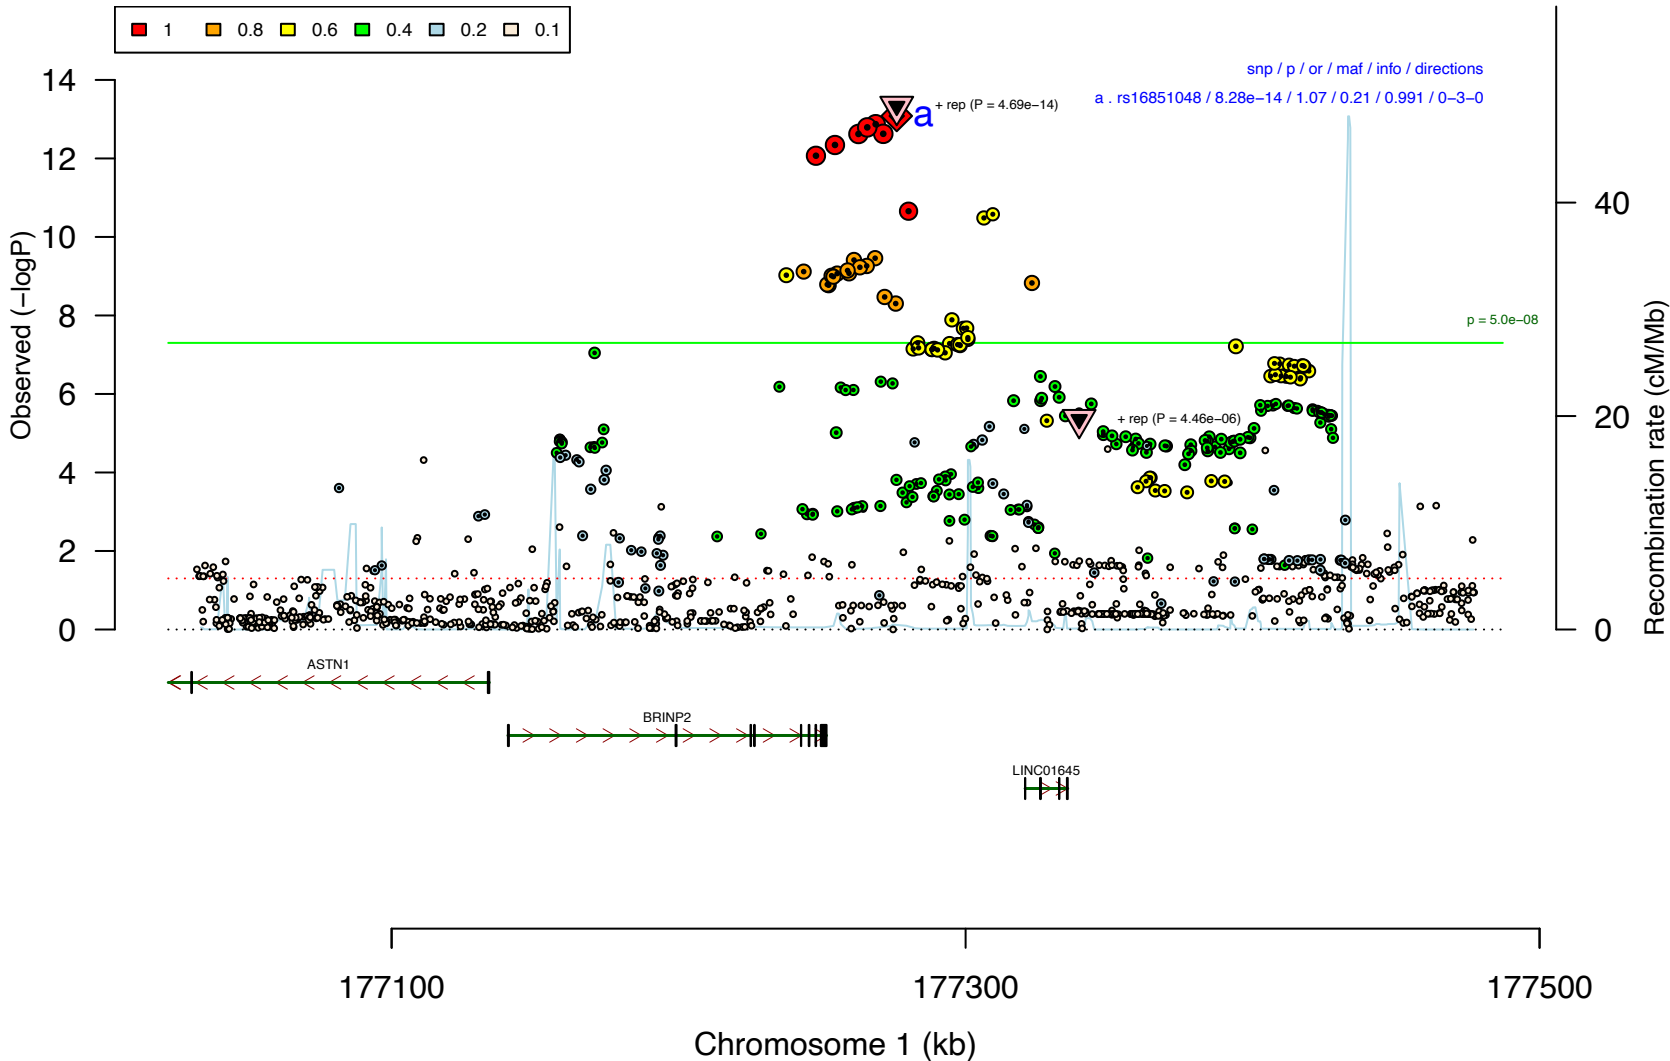

# PGC\_SCZ\_w3\_90\_0418b.47.chr10

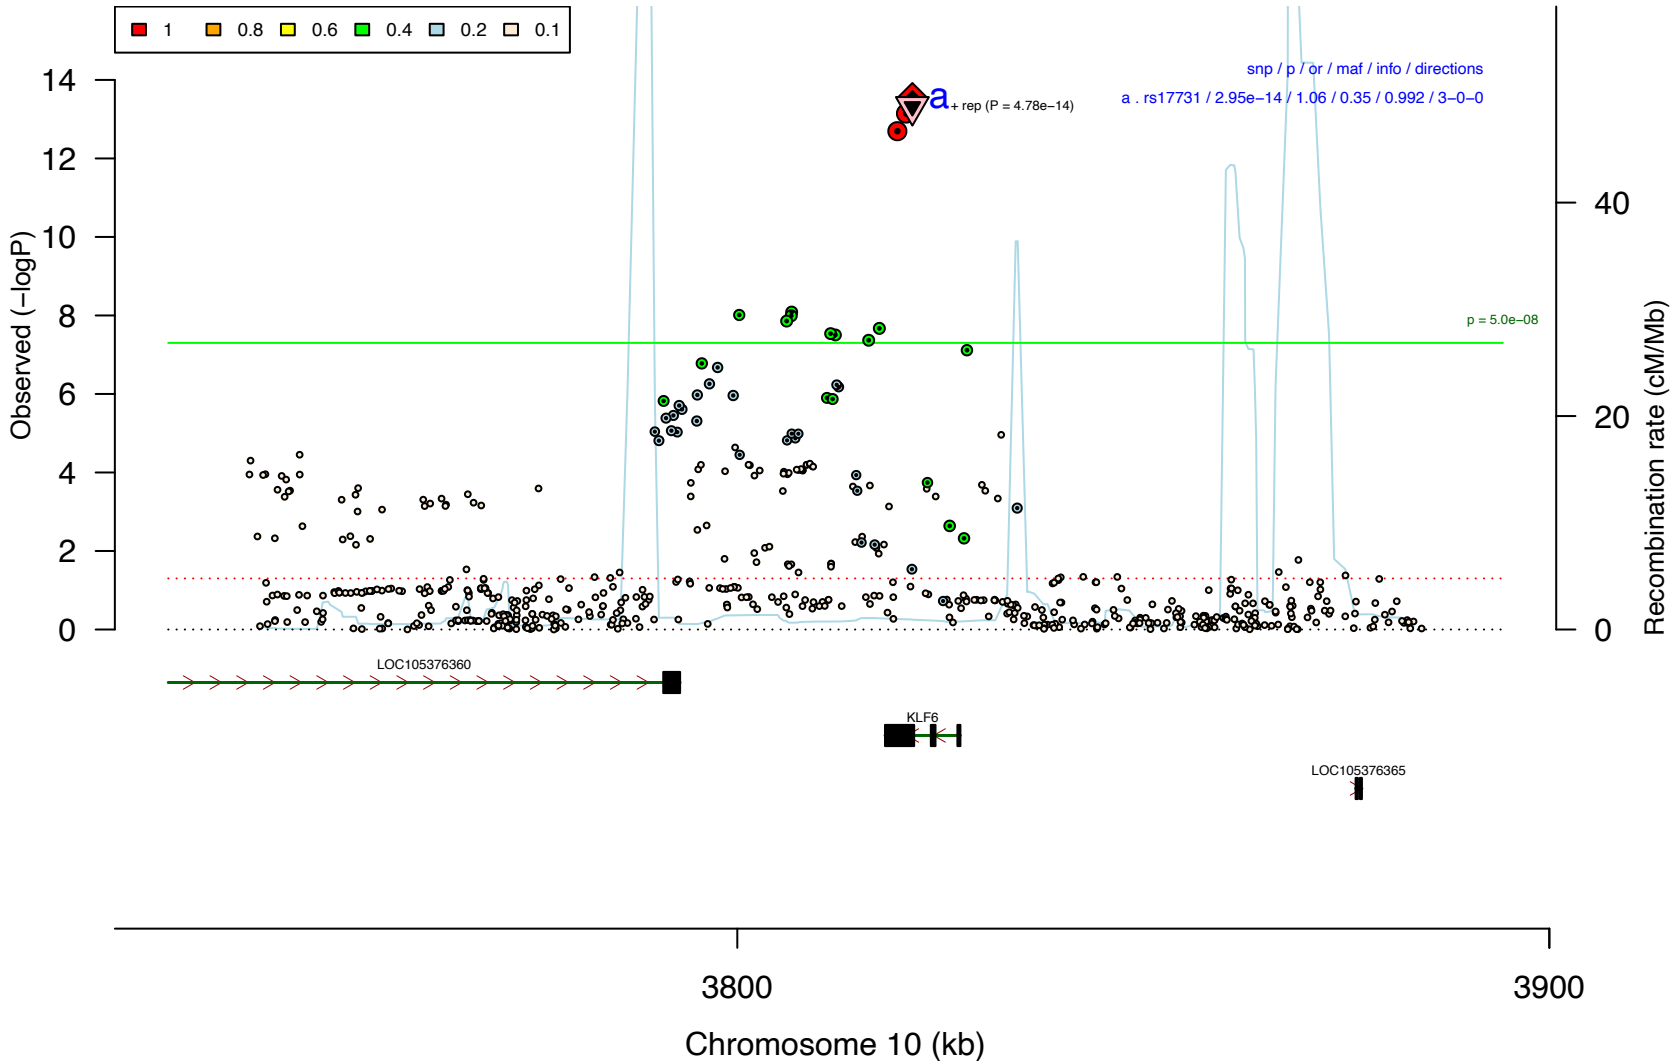

# PGC\_SCZ\_w3\_90\_0418b.48.chr5

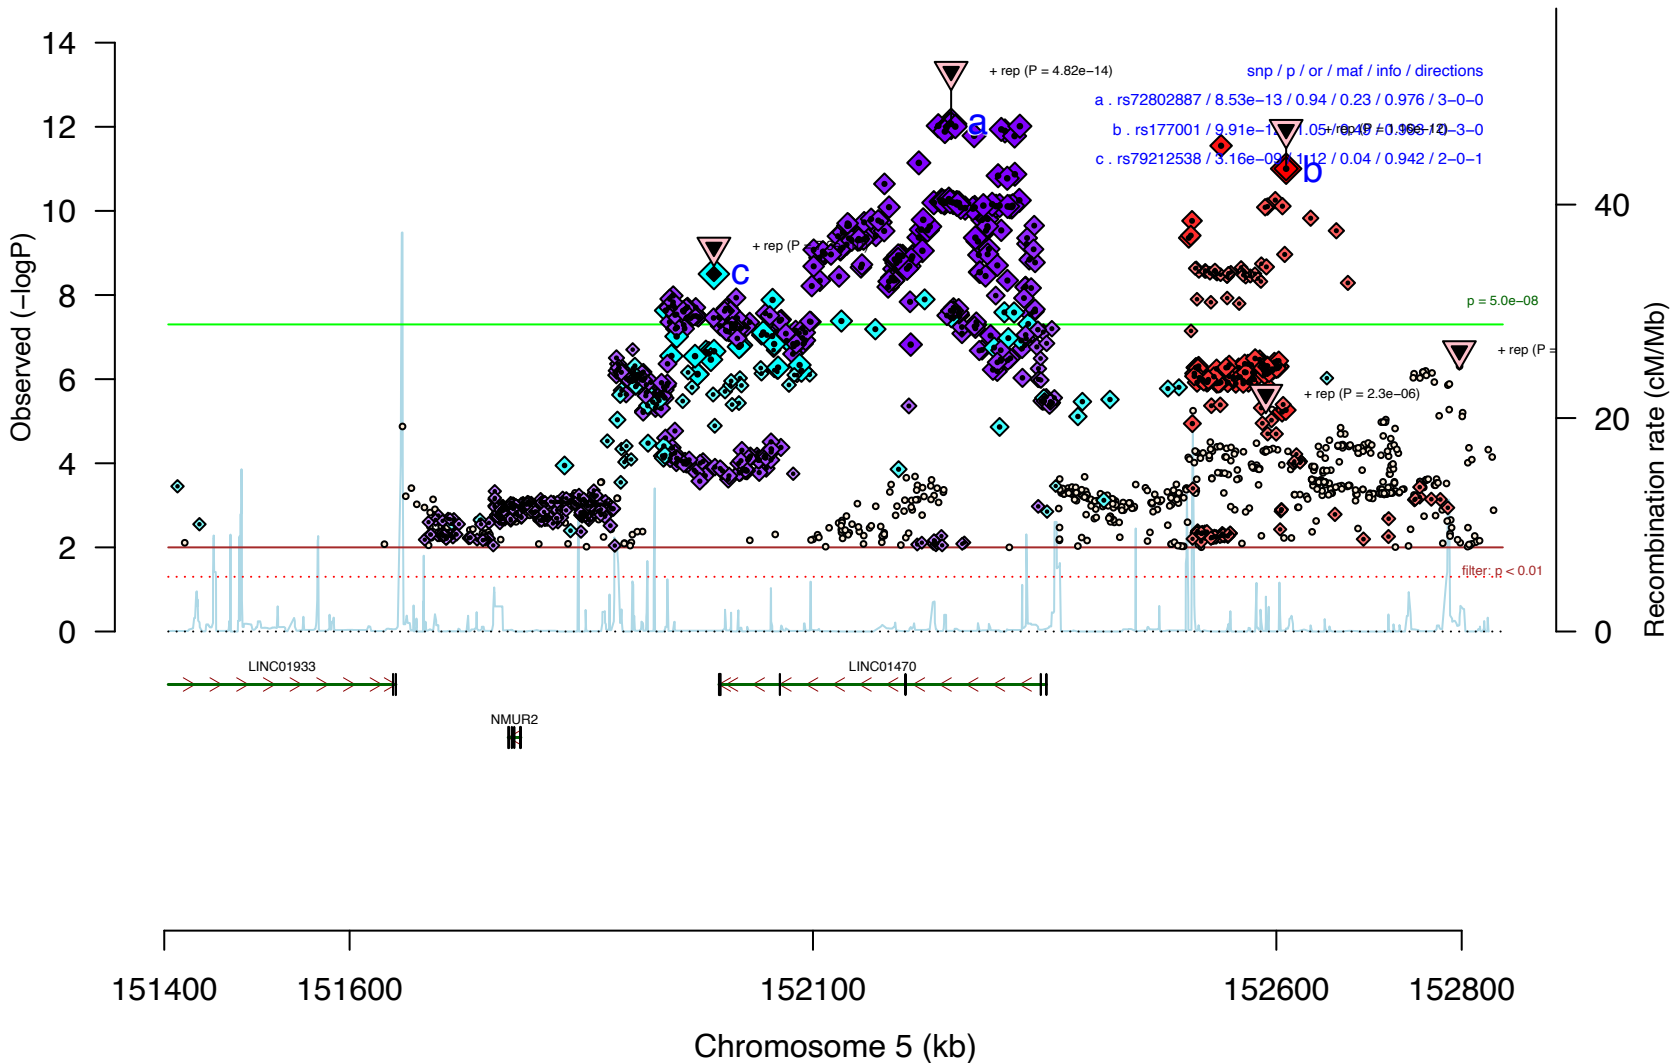

# PGC\_SCZ\_w3\_90\_0418b.49.chr8

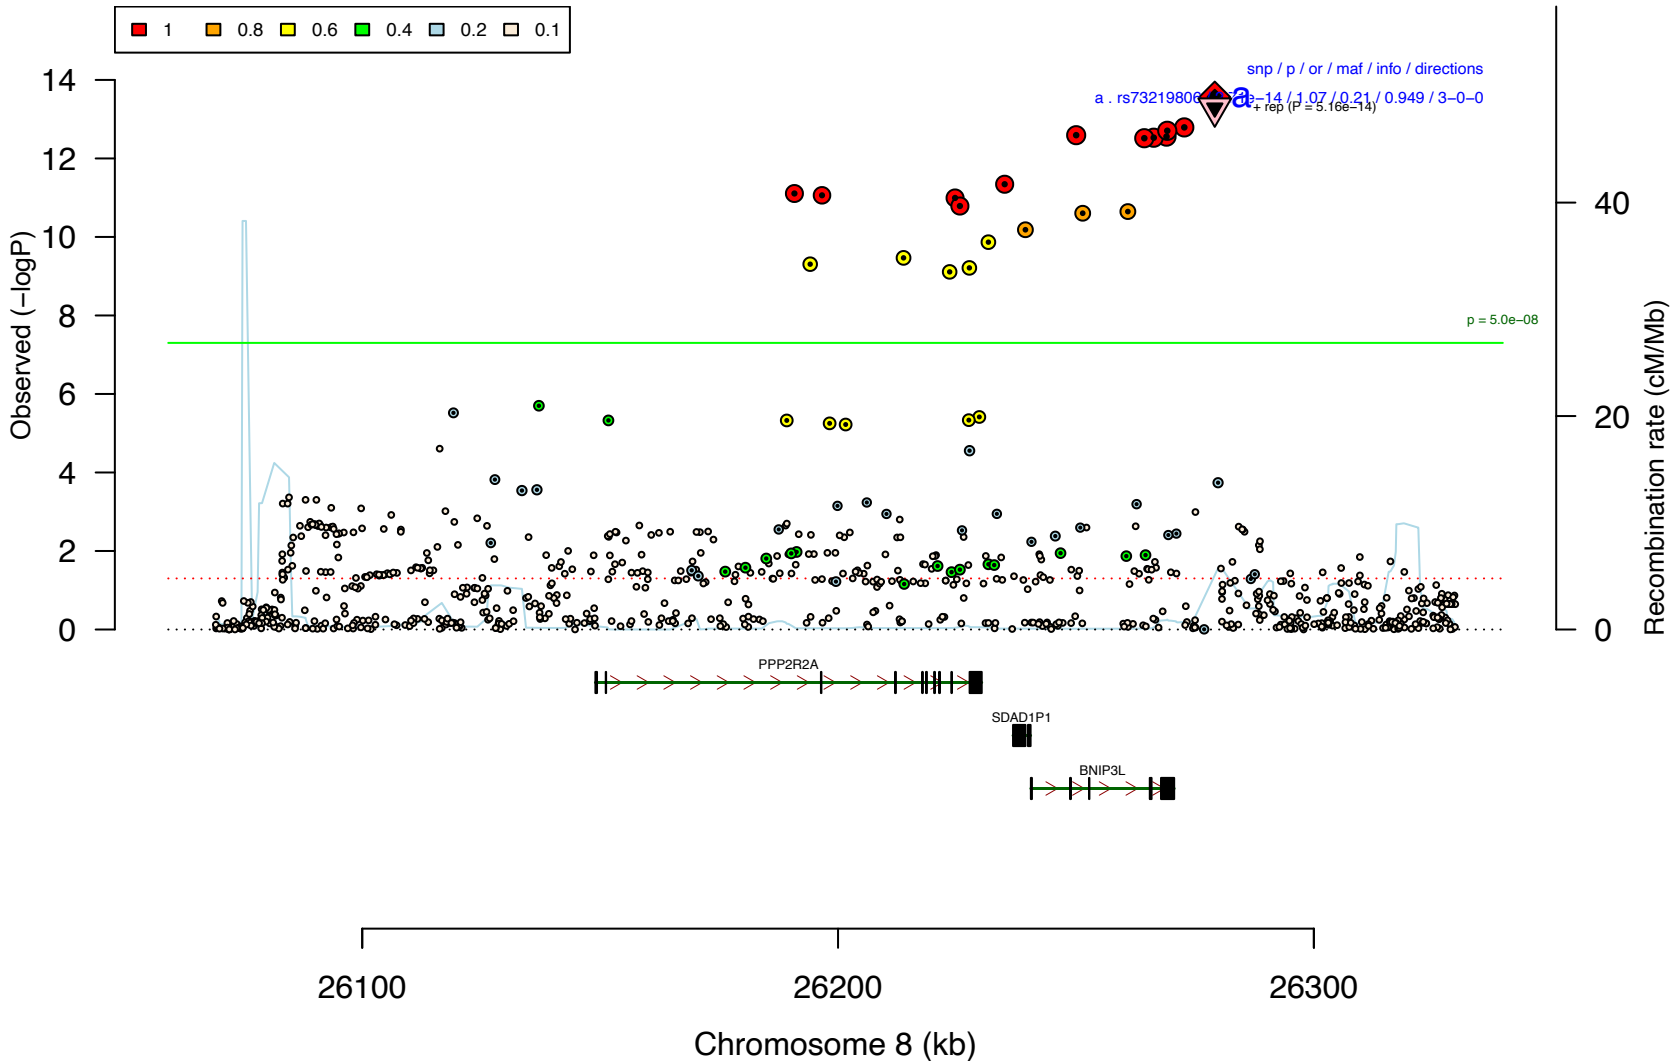

# PGC\_SCZ\_w3\_90\_0418b.50.chr18

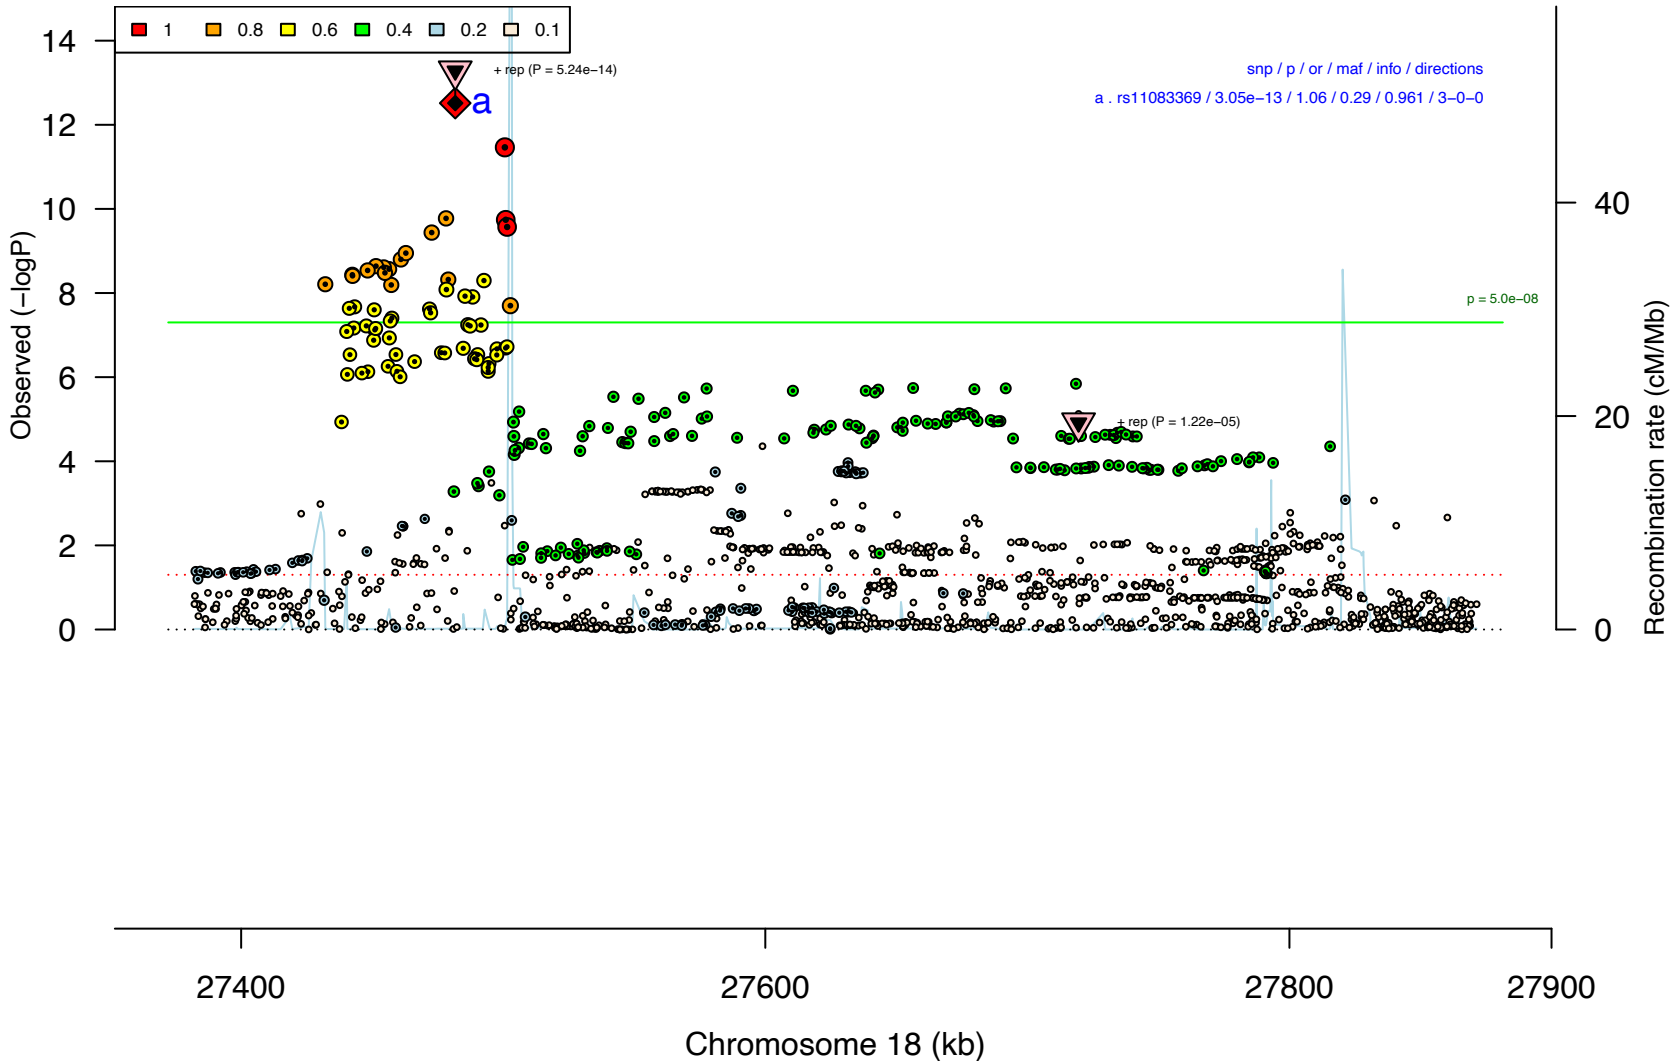

# PGC\_SCZ\_w3\_90\_0418b.51.chr15

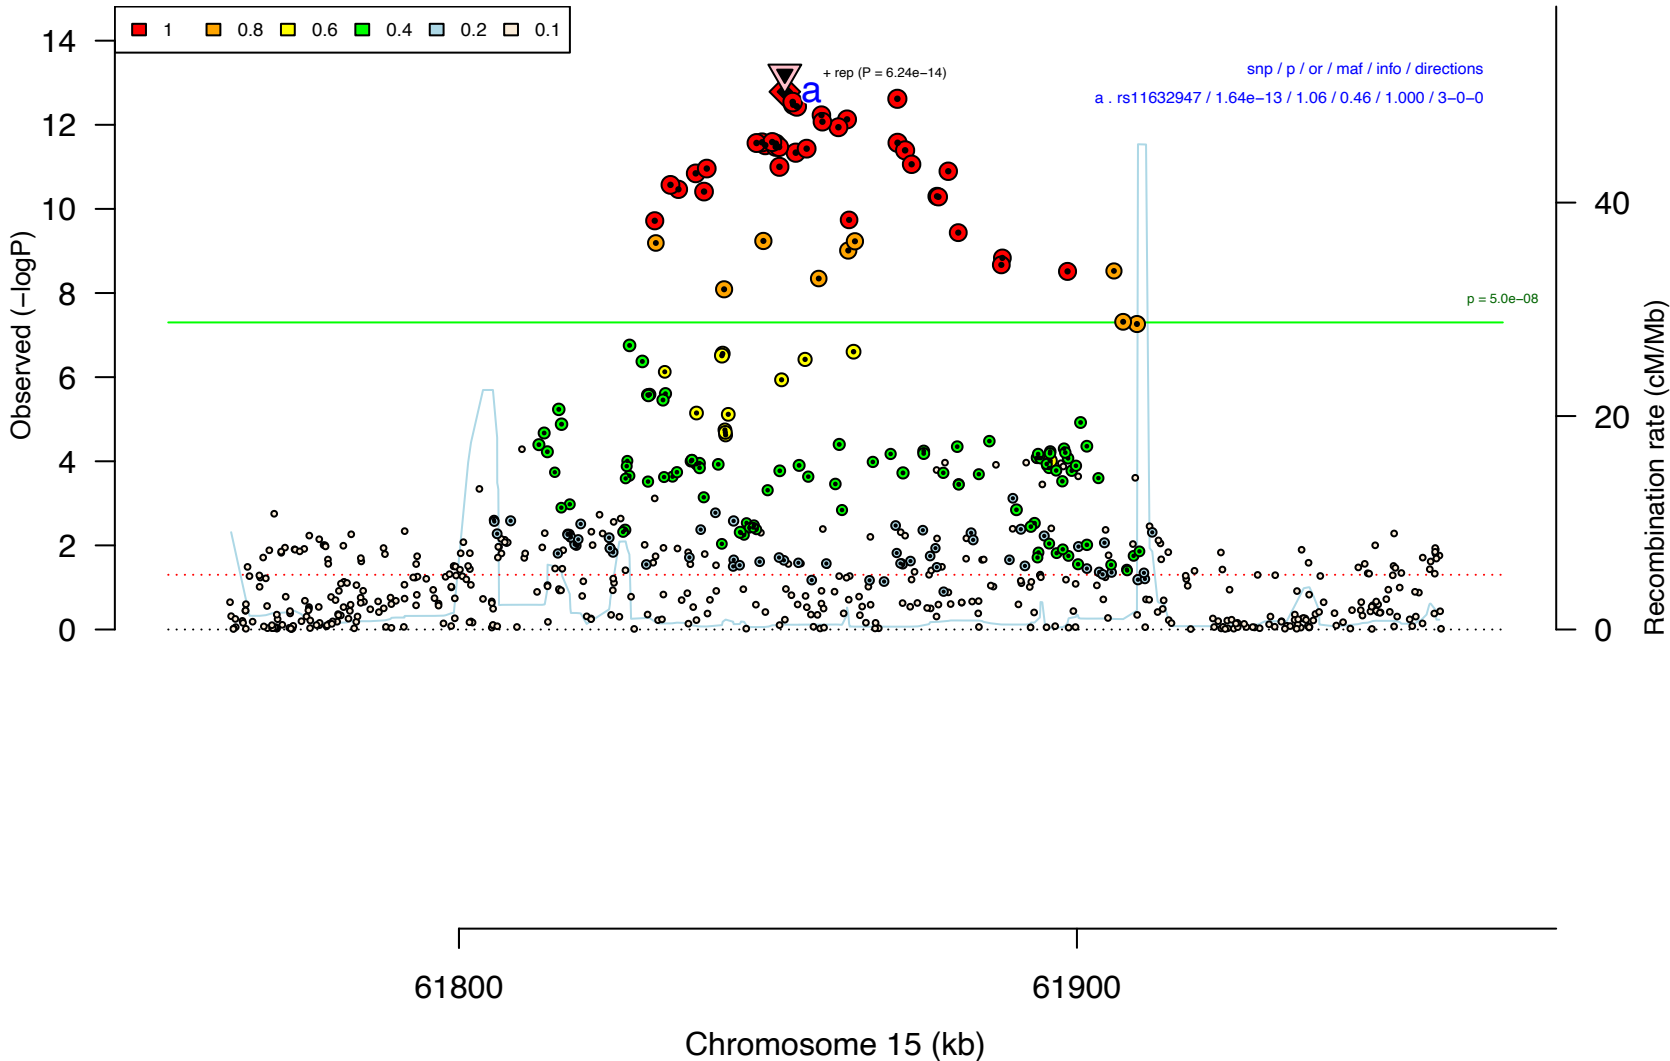

# PGC\_SCZ\_w3\_90\_0418b.52.chr13

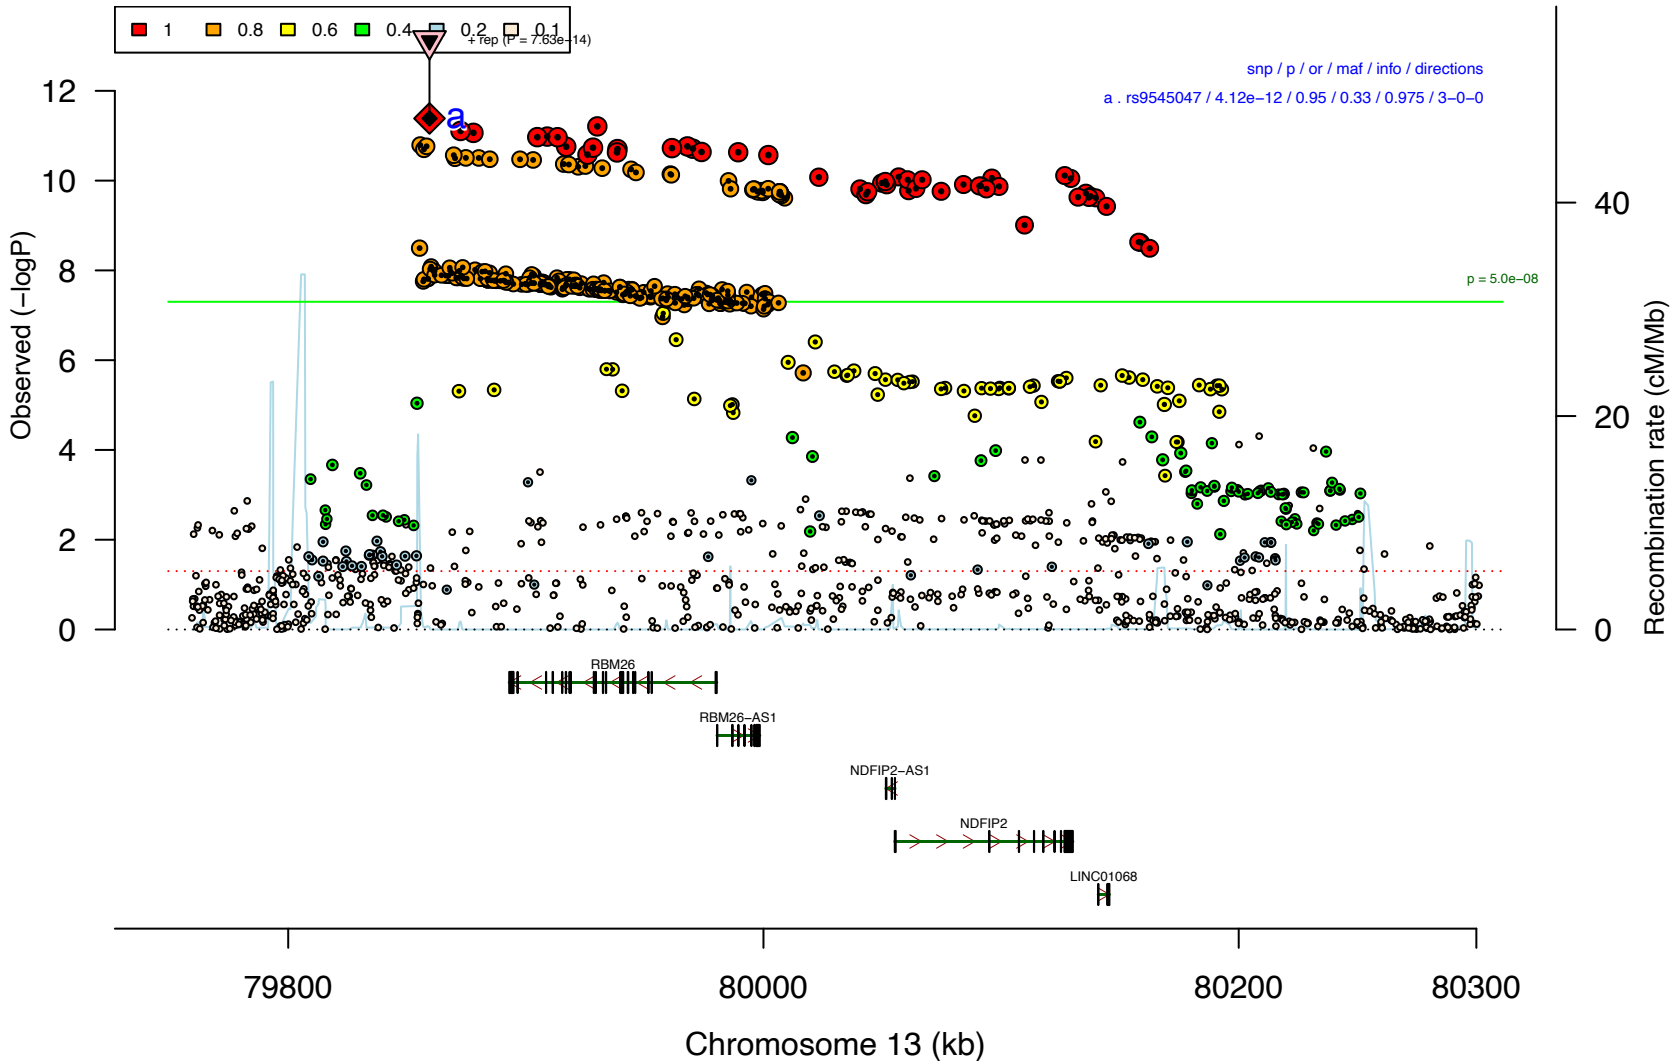



# PGC\_SCZ\_w3\_90\_0418b.53.chr7

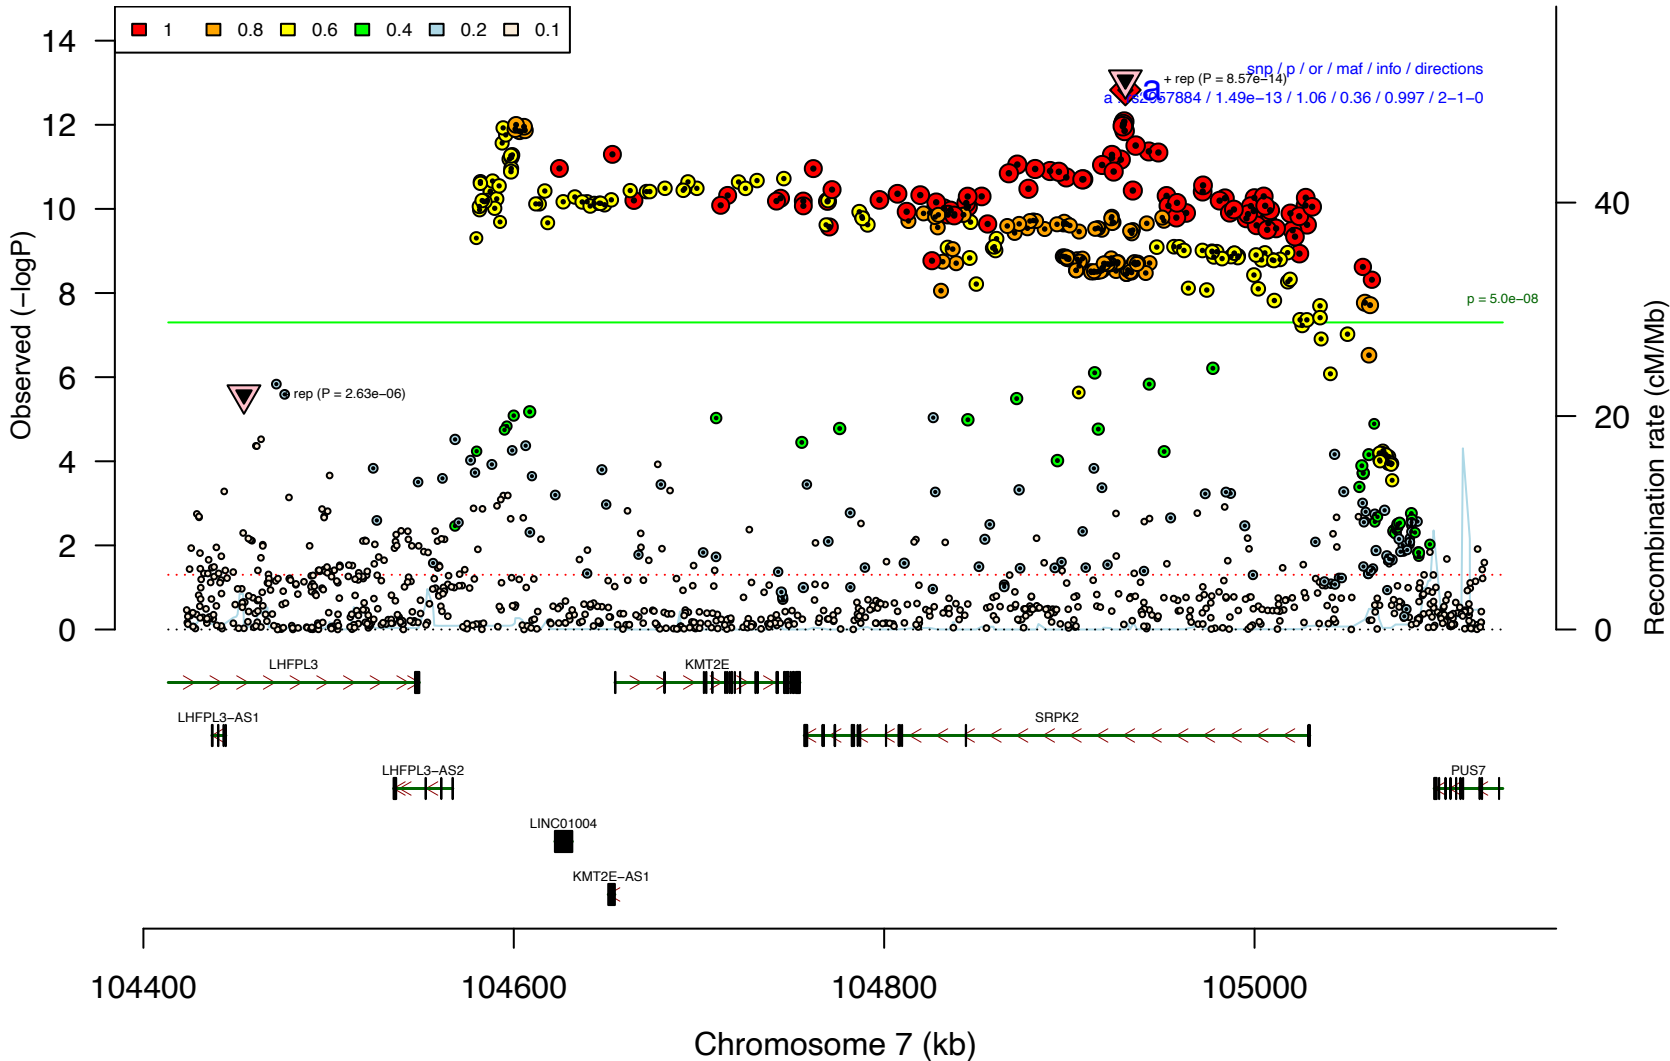

# PGC\_SCZ\_w3\_90\_0418b.54.chr22

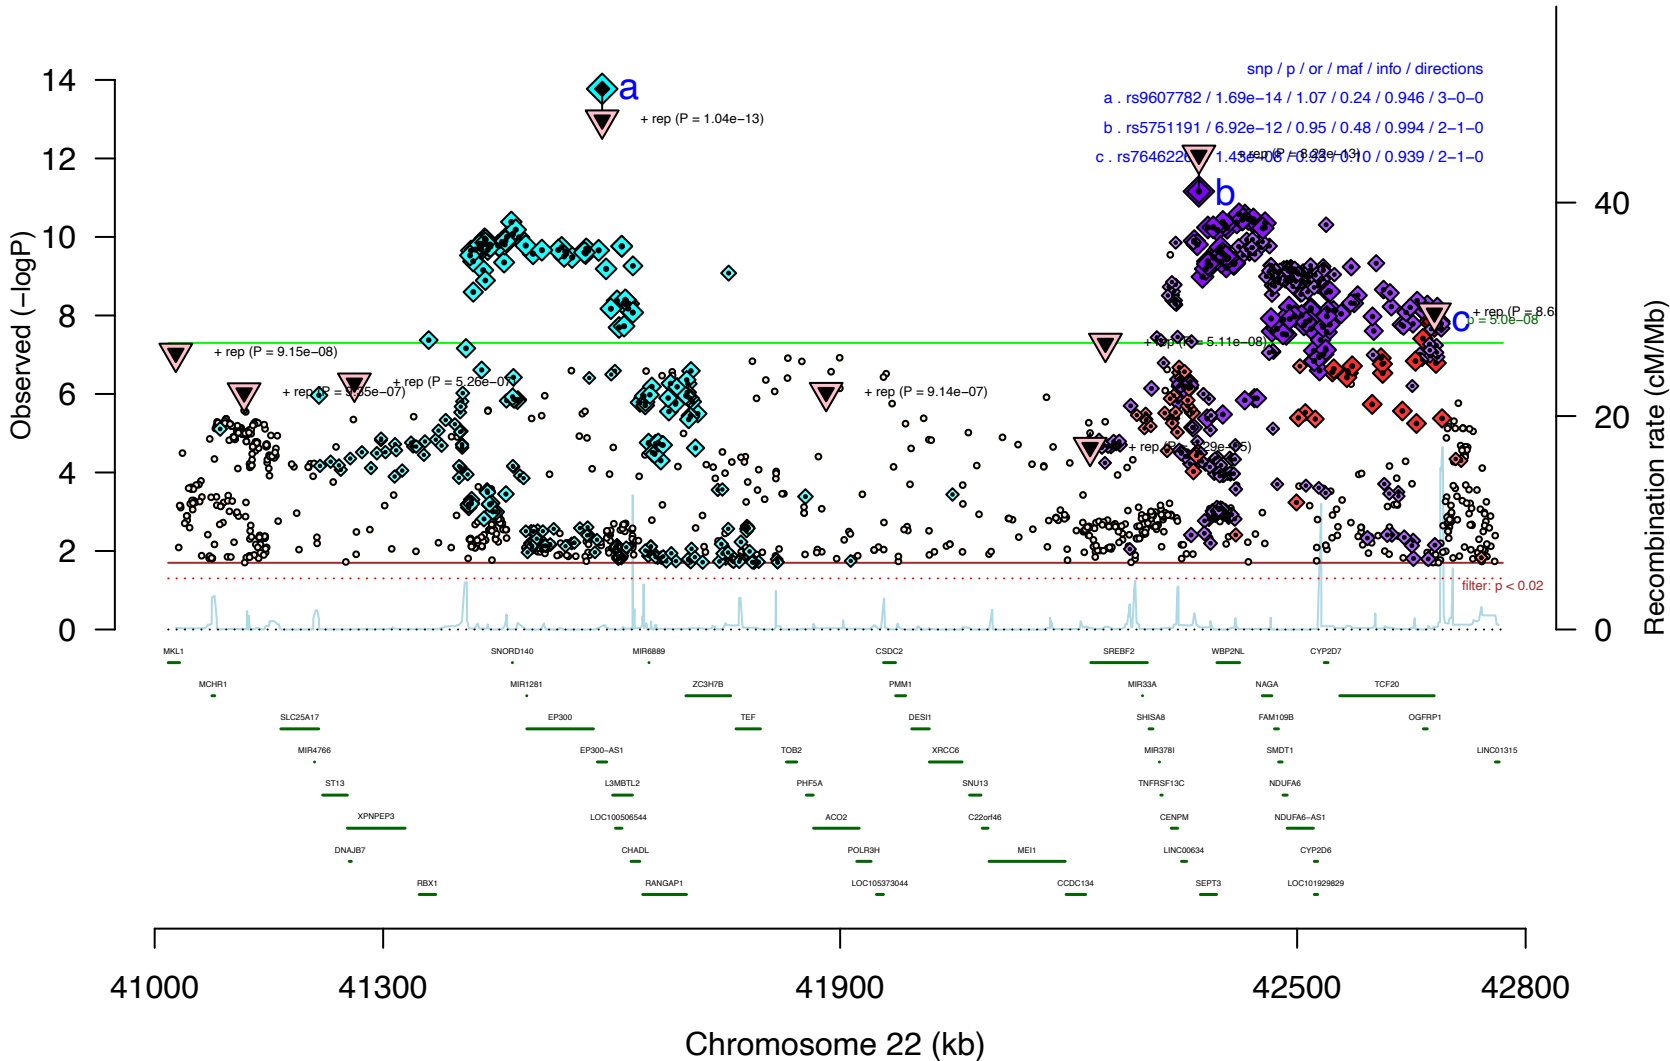

# PGC\_SCZ\_w3\_90\_0418b.55.chr18

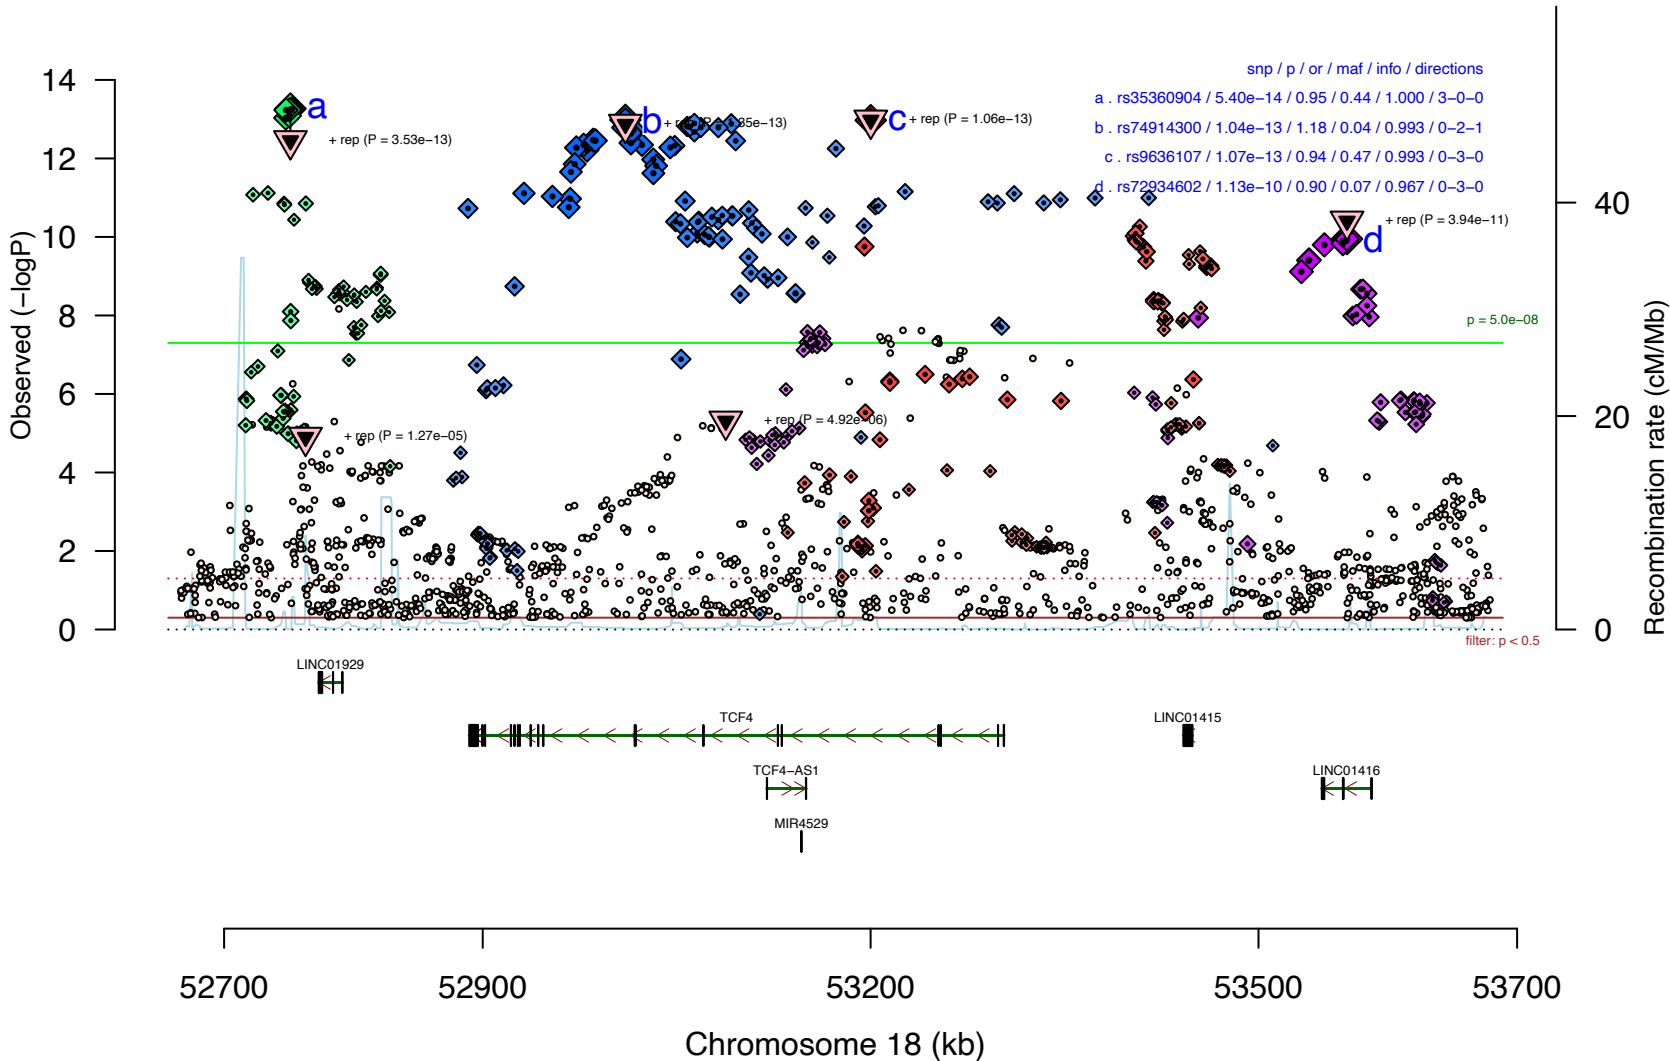

# PGC\_SCZ\_w3\_90\_0418b.56.chr14

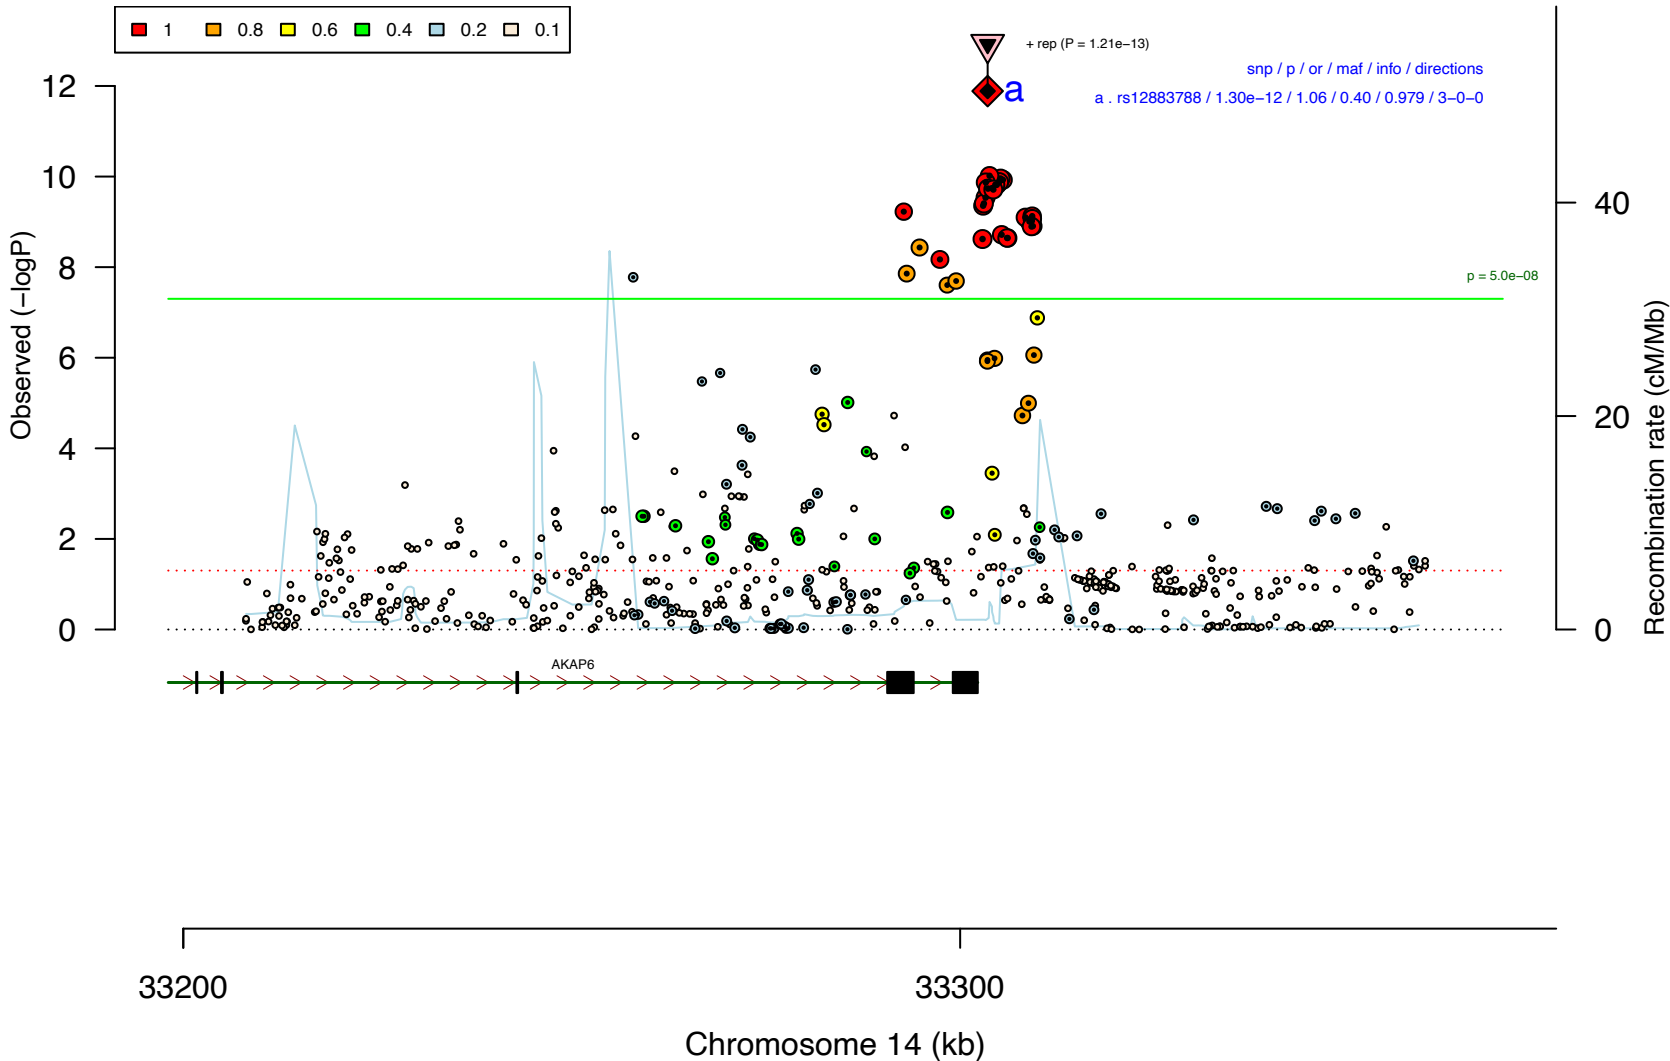

# PGC\_SCZ\_w3\_90\_0418b.57.chr2

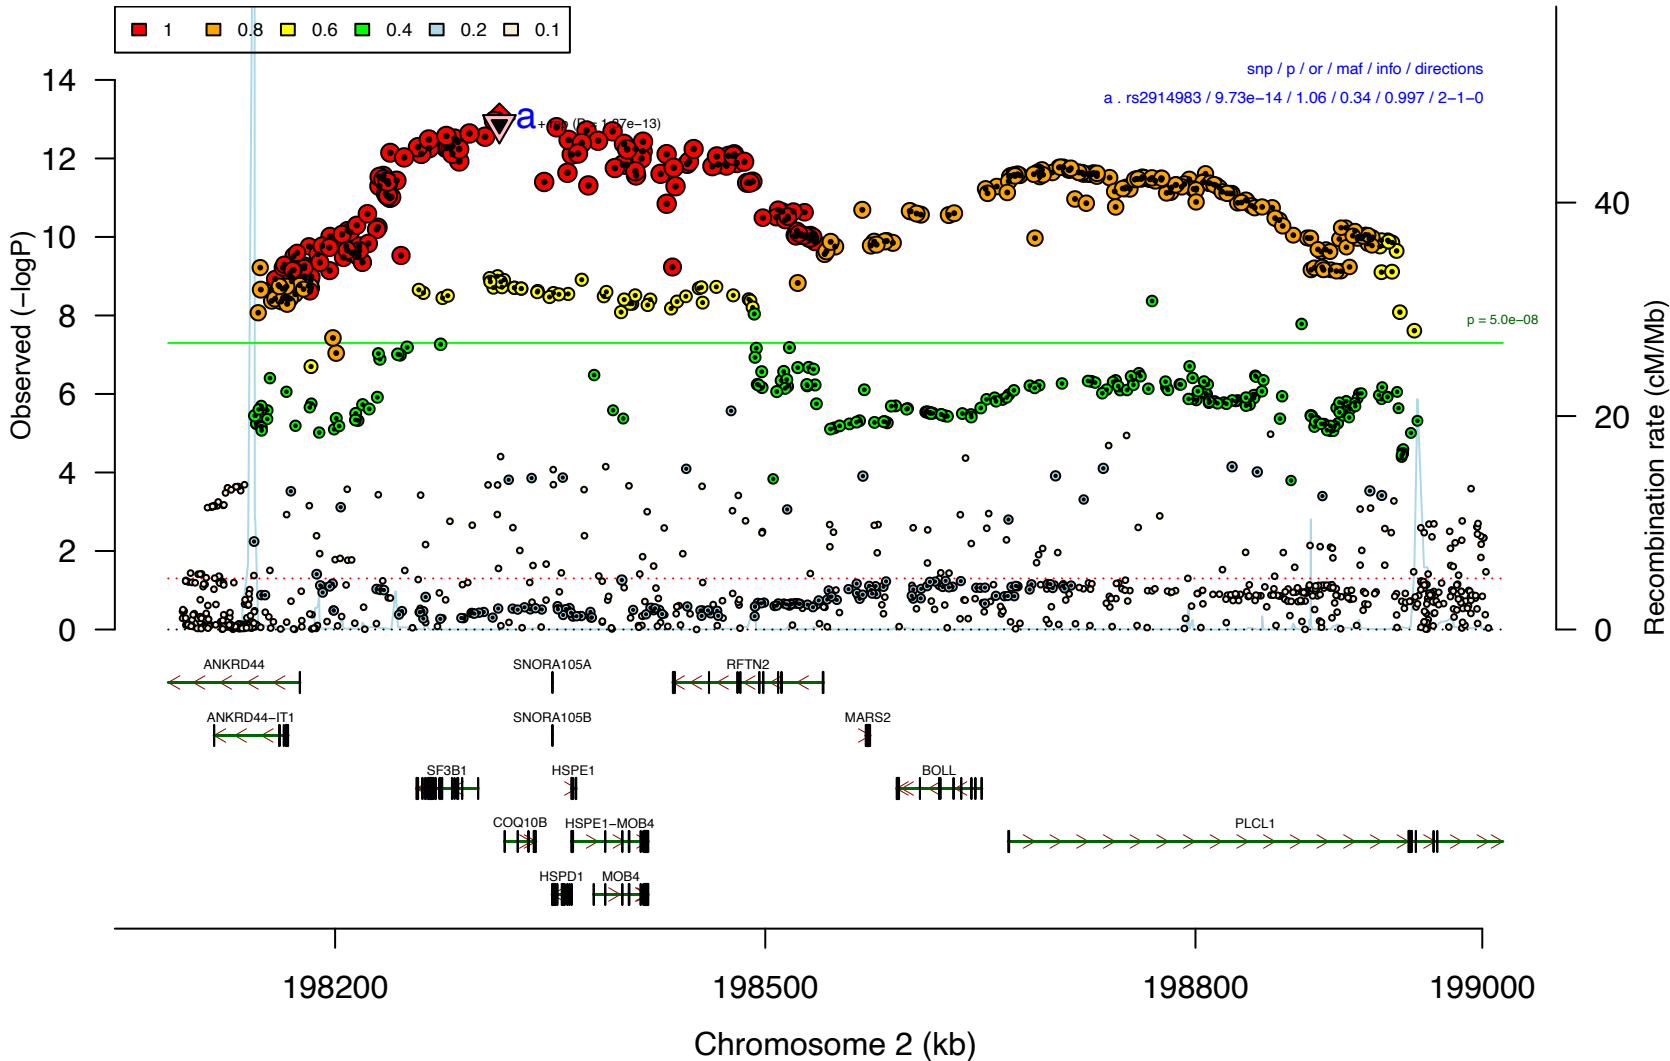

# PGC\_SCZ\_w3\_90\_0418b.58.chr16

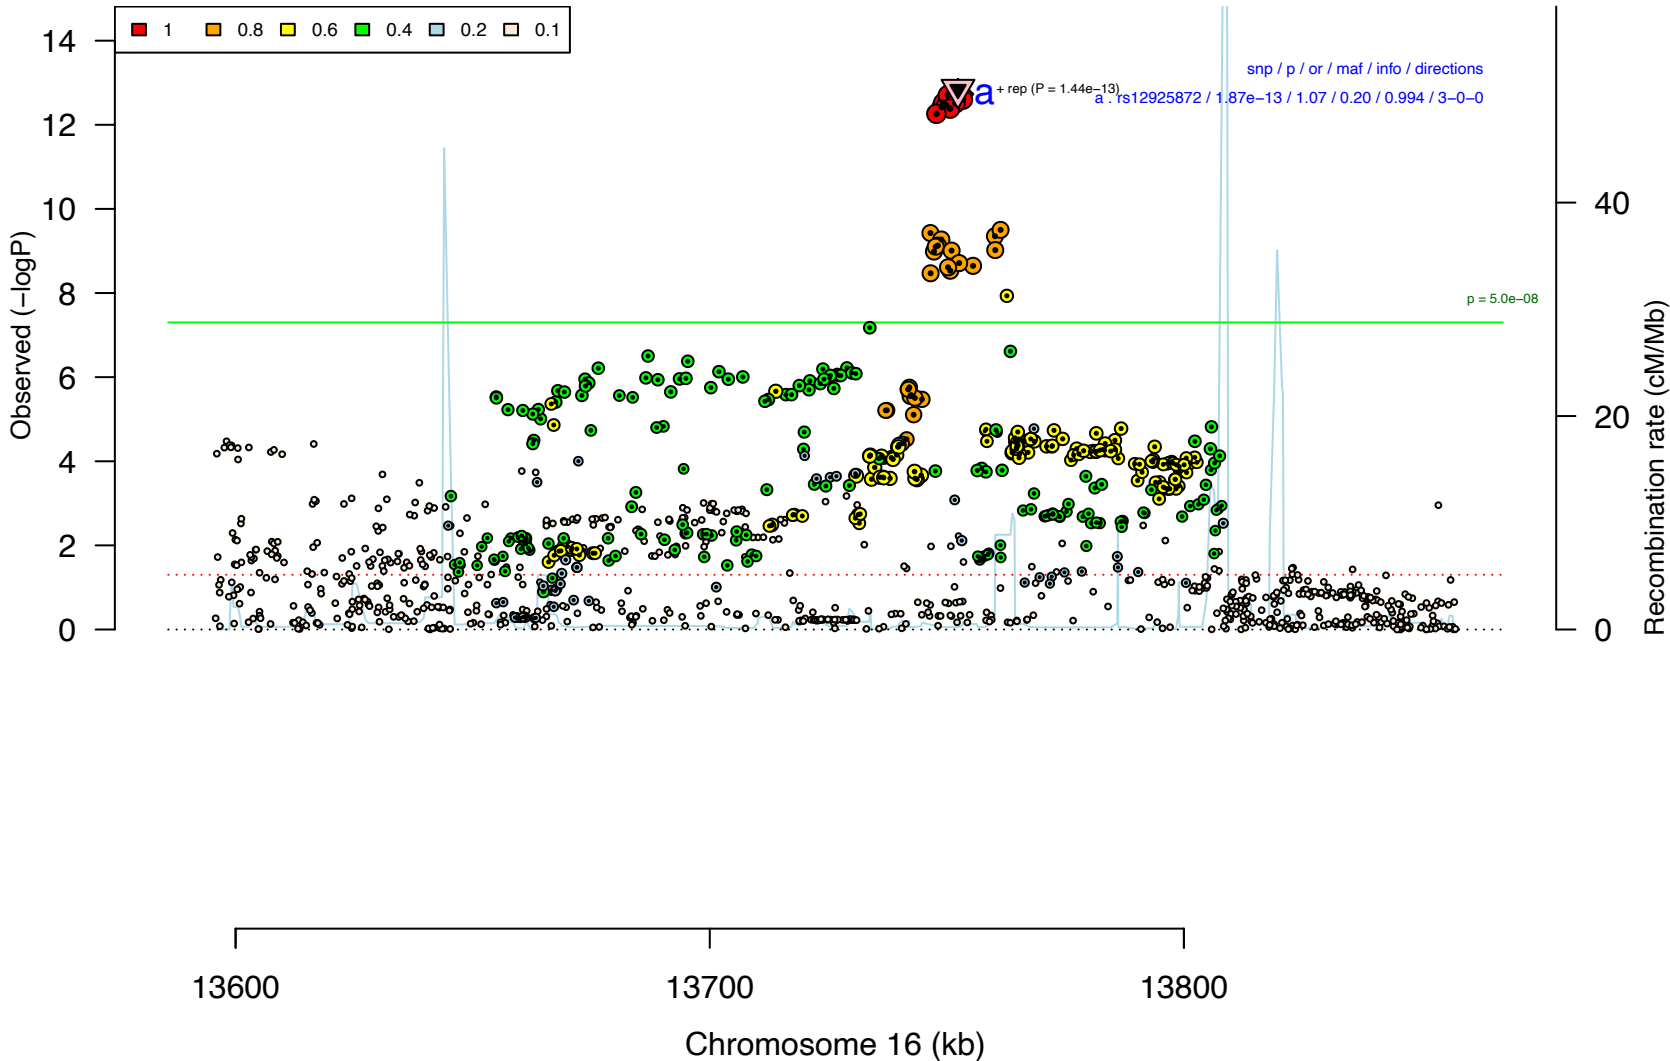

# PGC\_SCZ\_w3\_90\_0418b.59.chr2

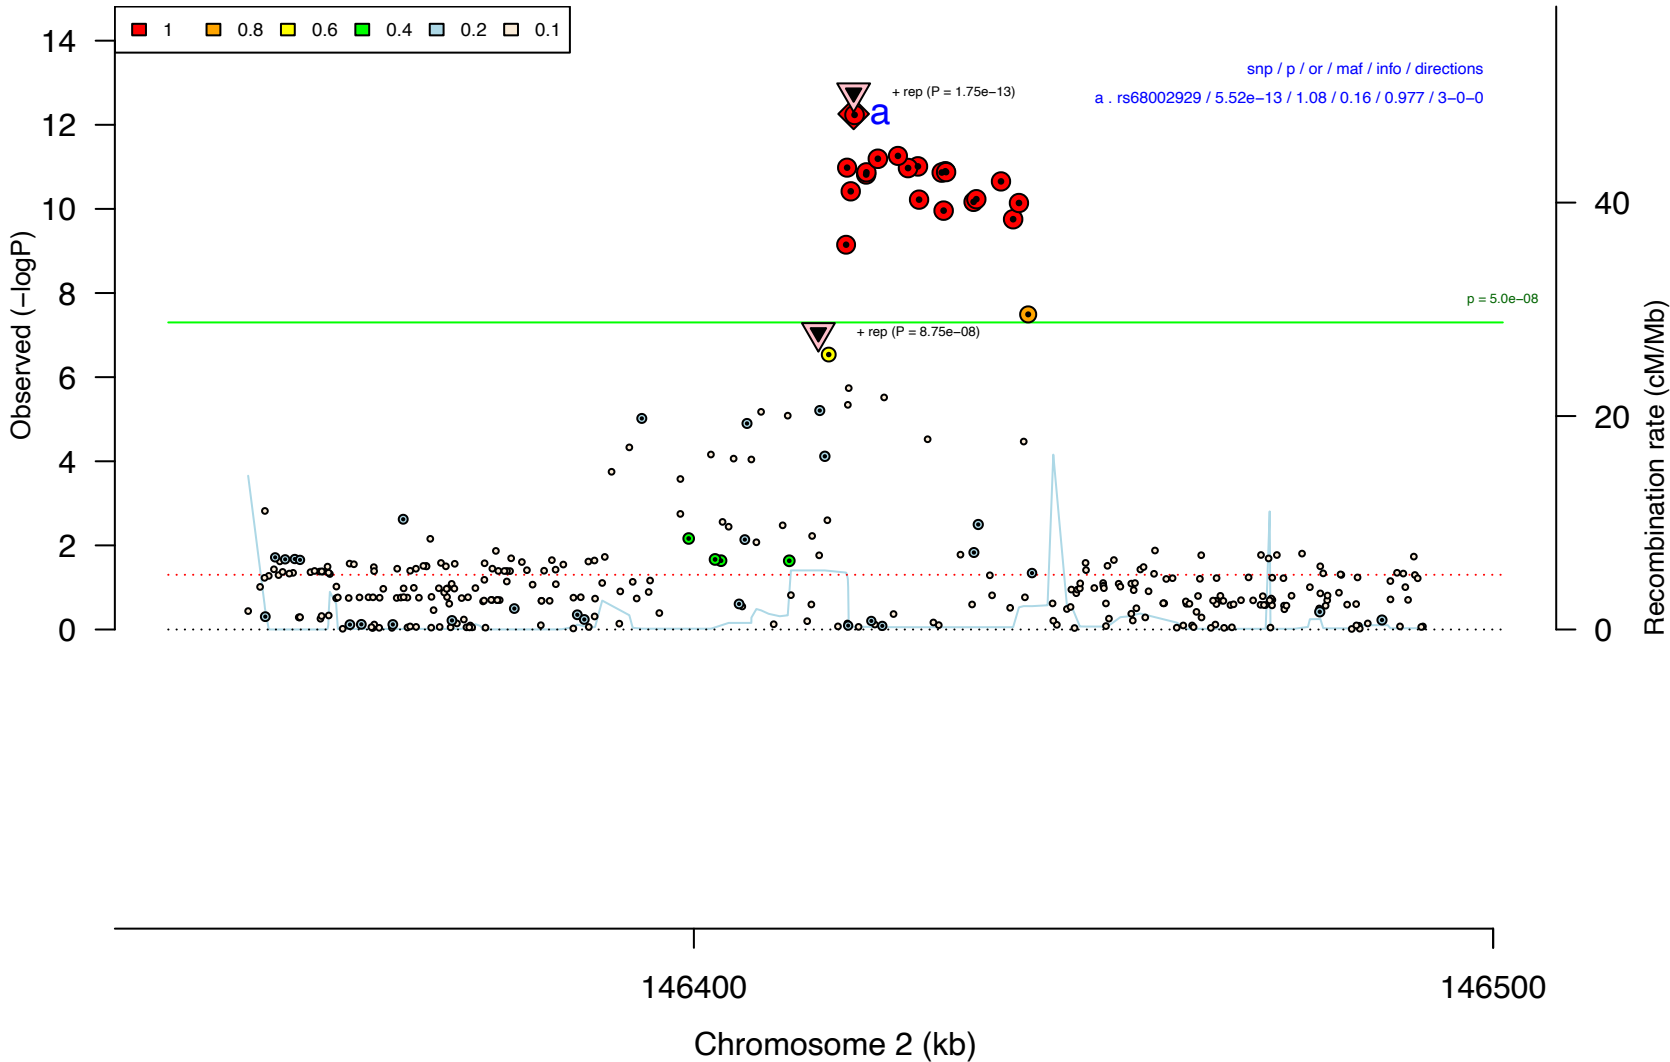

# PGC\_SCZ\_w3\_90\_0418b.60.chr11

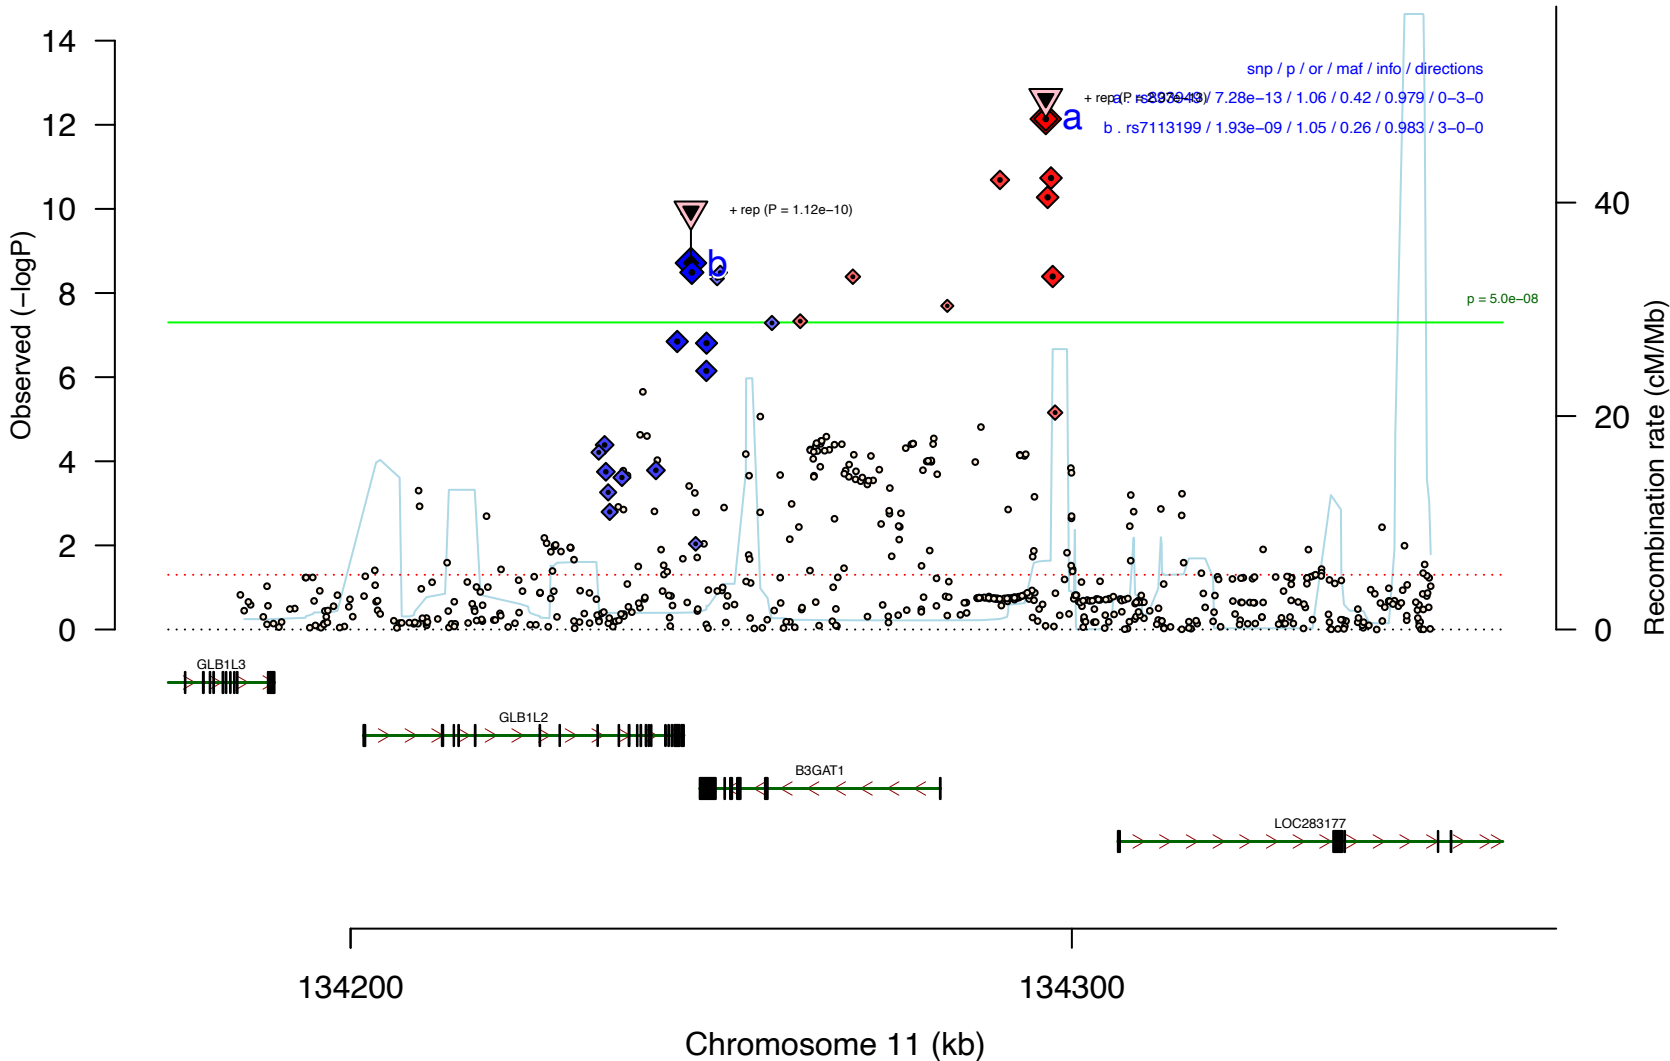



# PGC\_SCZ\_w3\_90\_0418b.61.chr7

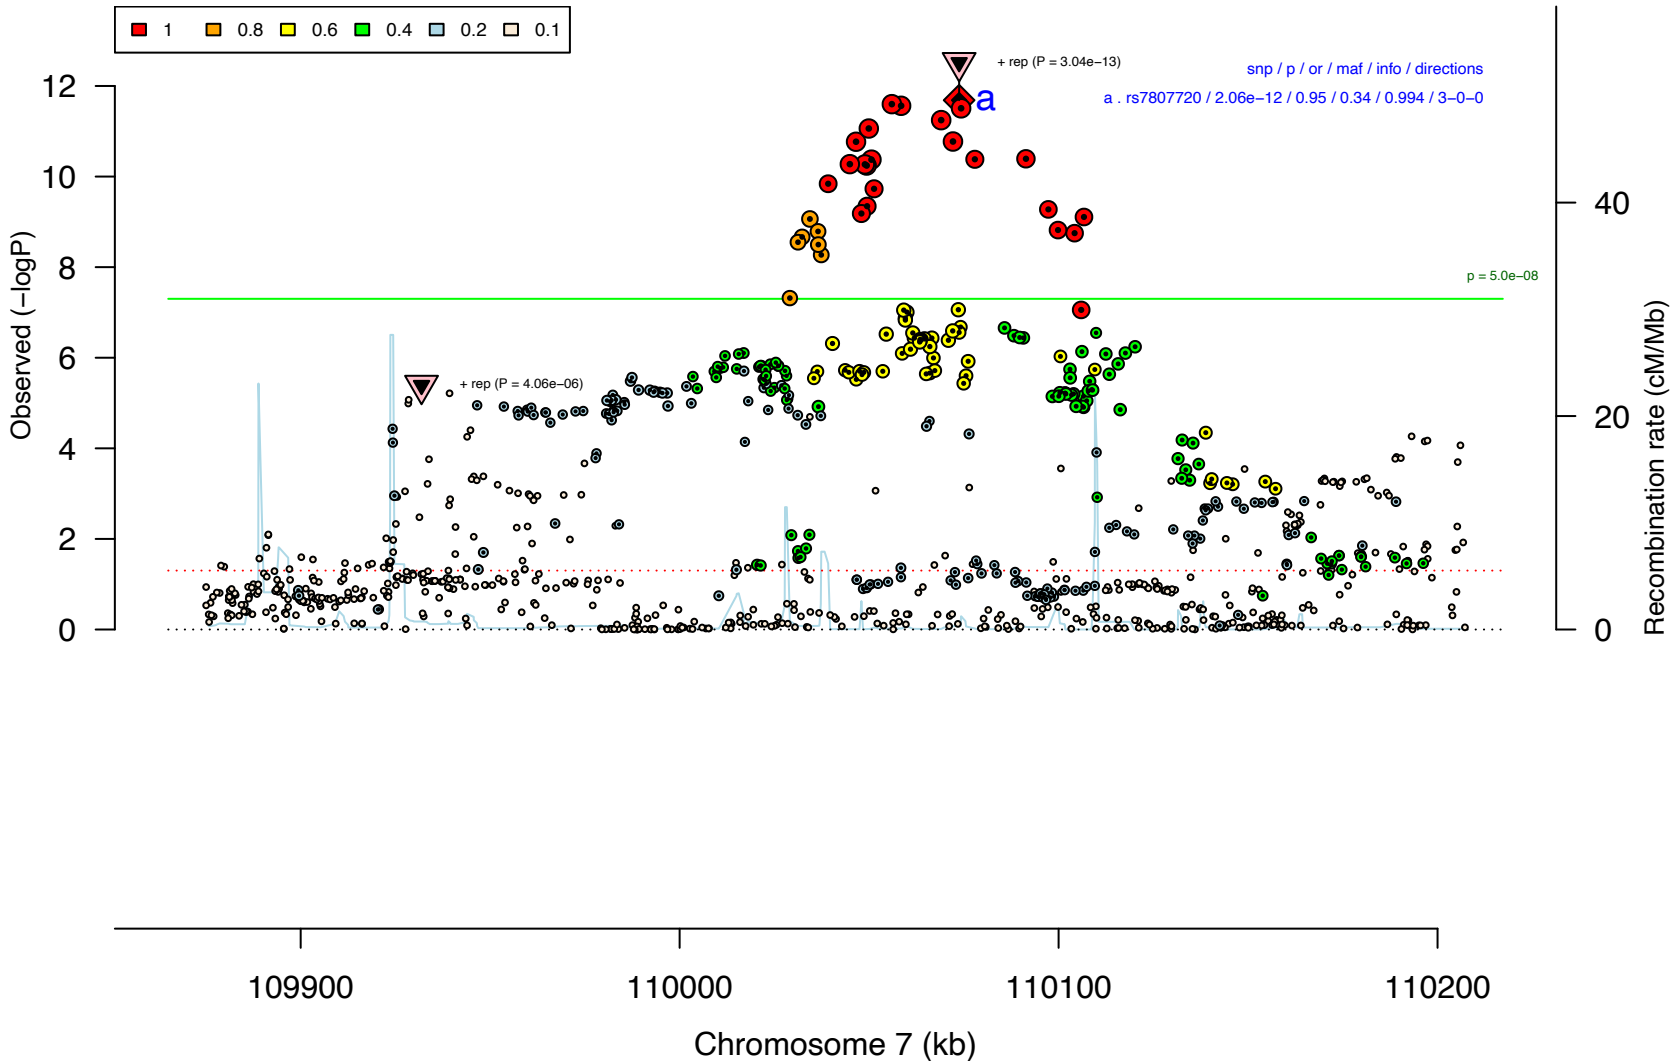

# PGC\_SCZ\_w3\_90\_0418b.62.chr11

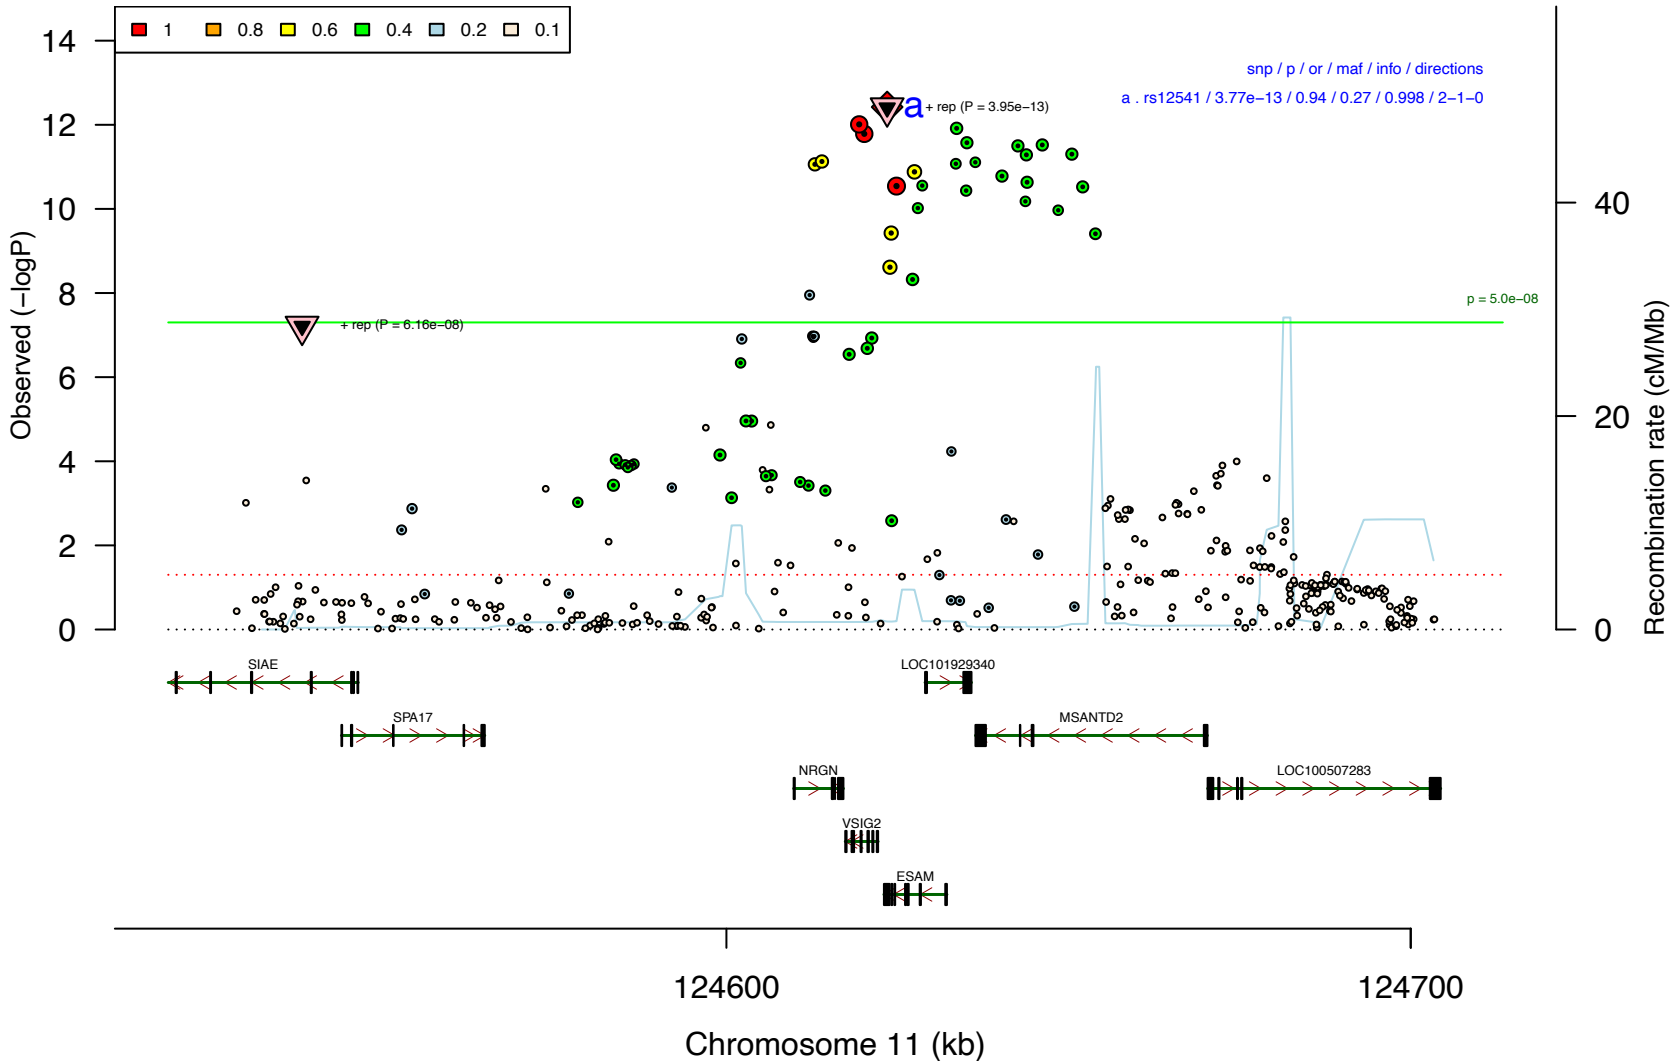

# PGC\_SCZ\_w3\_90\_0418b.63.chr1

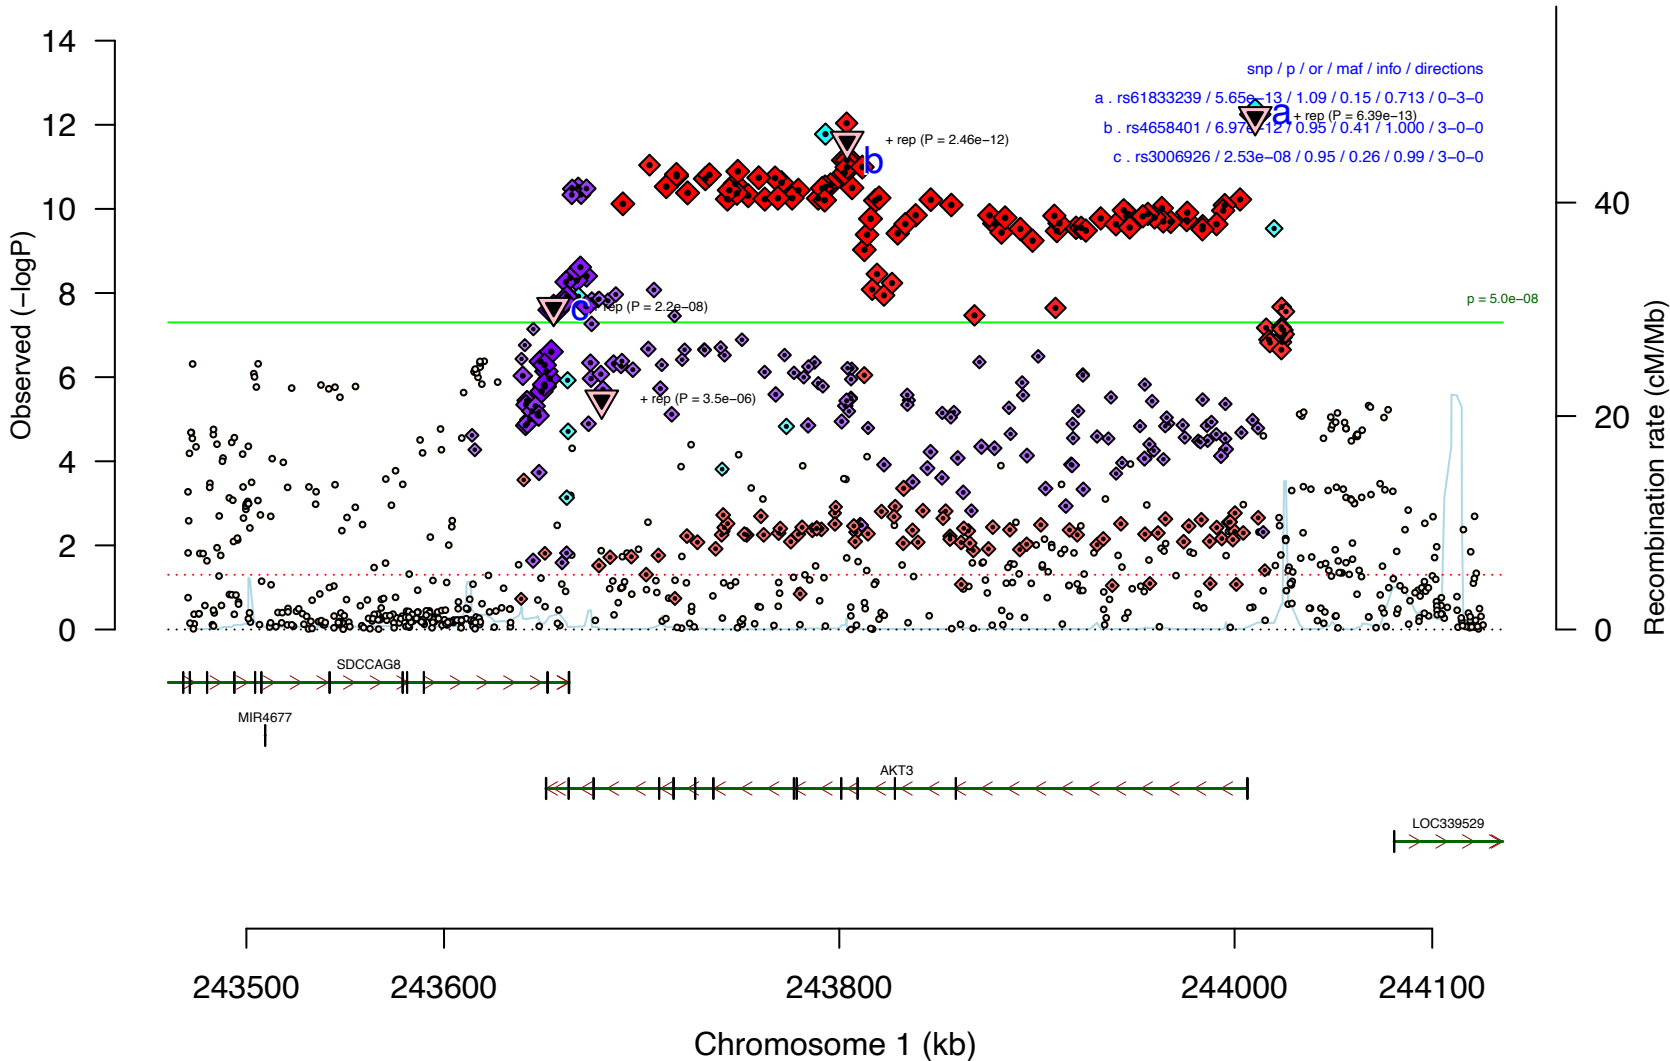

# PGC\_SCZ\_w3\_90\_0418b.64.chr18

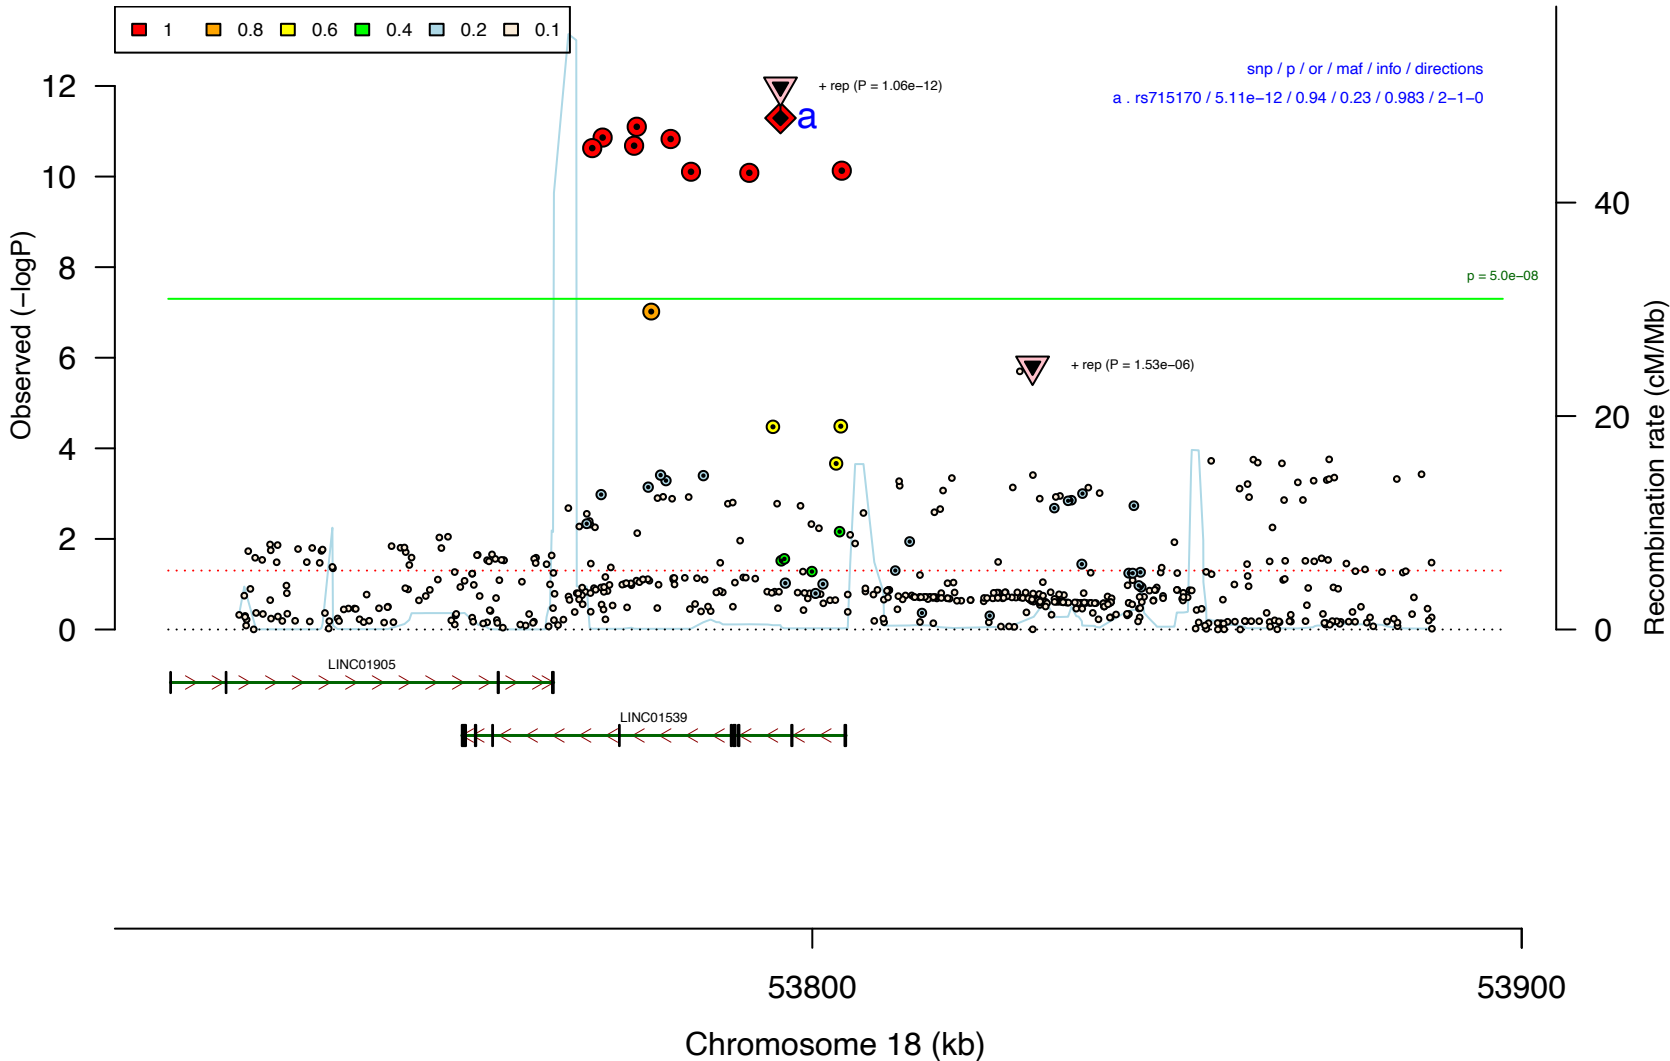

# PGC\_SCZ\_w3\_90\_0418b.65.chr2

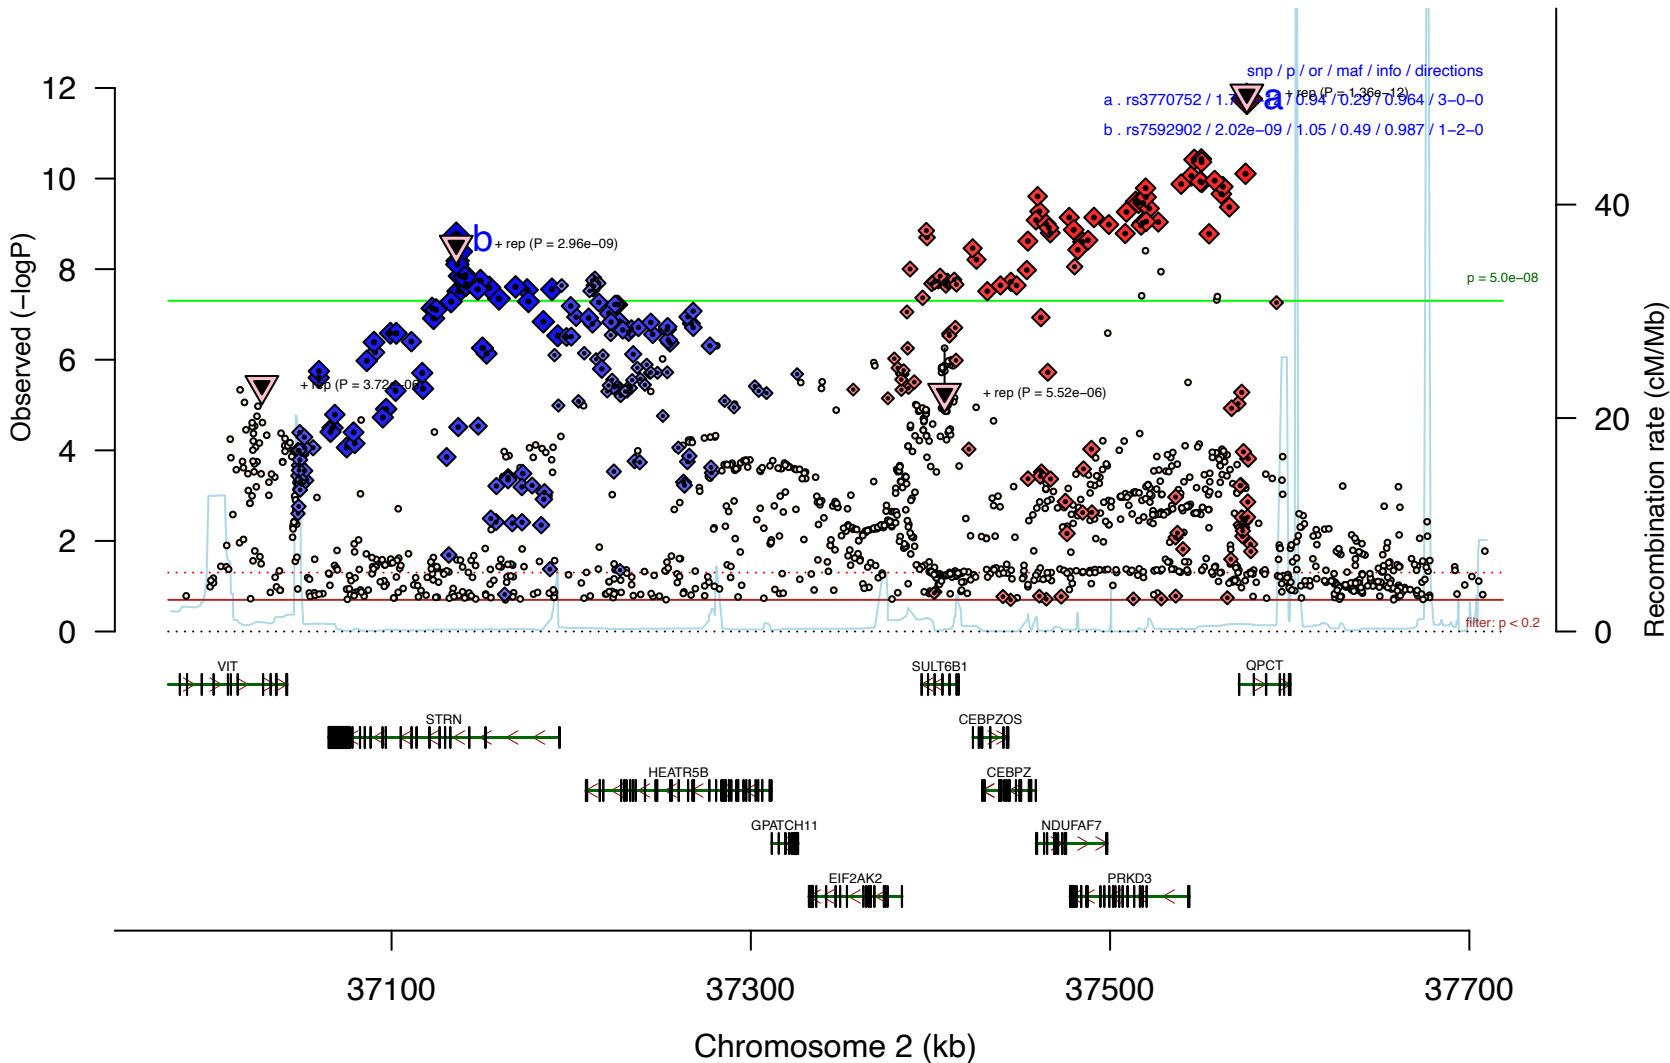

# PGC\_SCZ\_w3\_90\_0418b.66.chr8

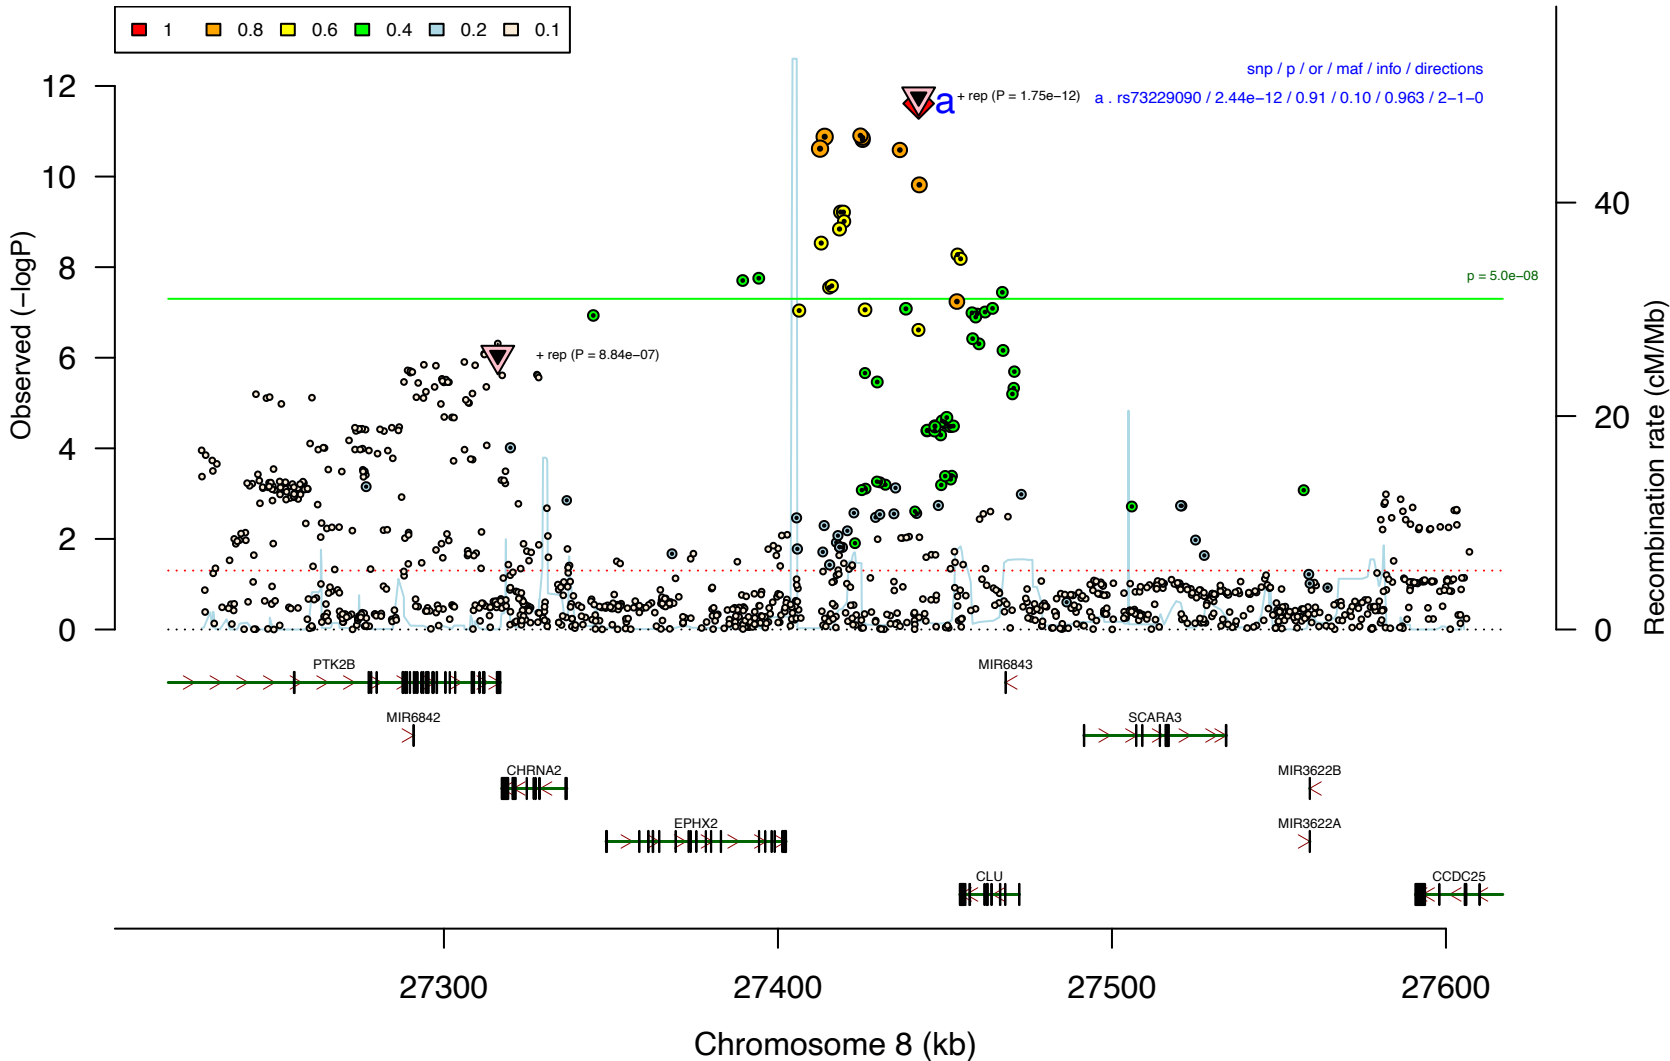

# PGC\_SCZ\_w3\_90\_0418b.67.chr1

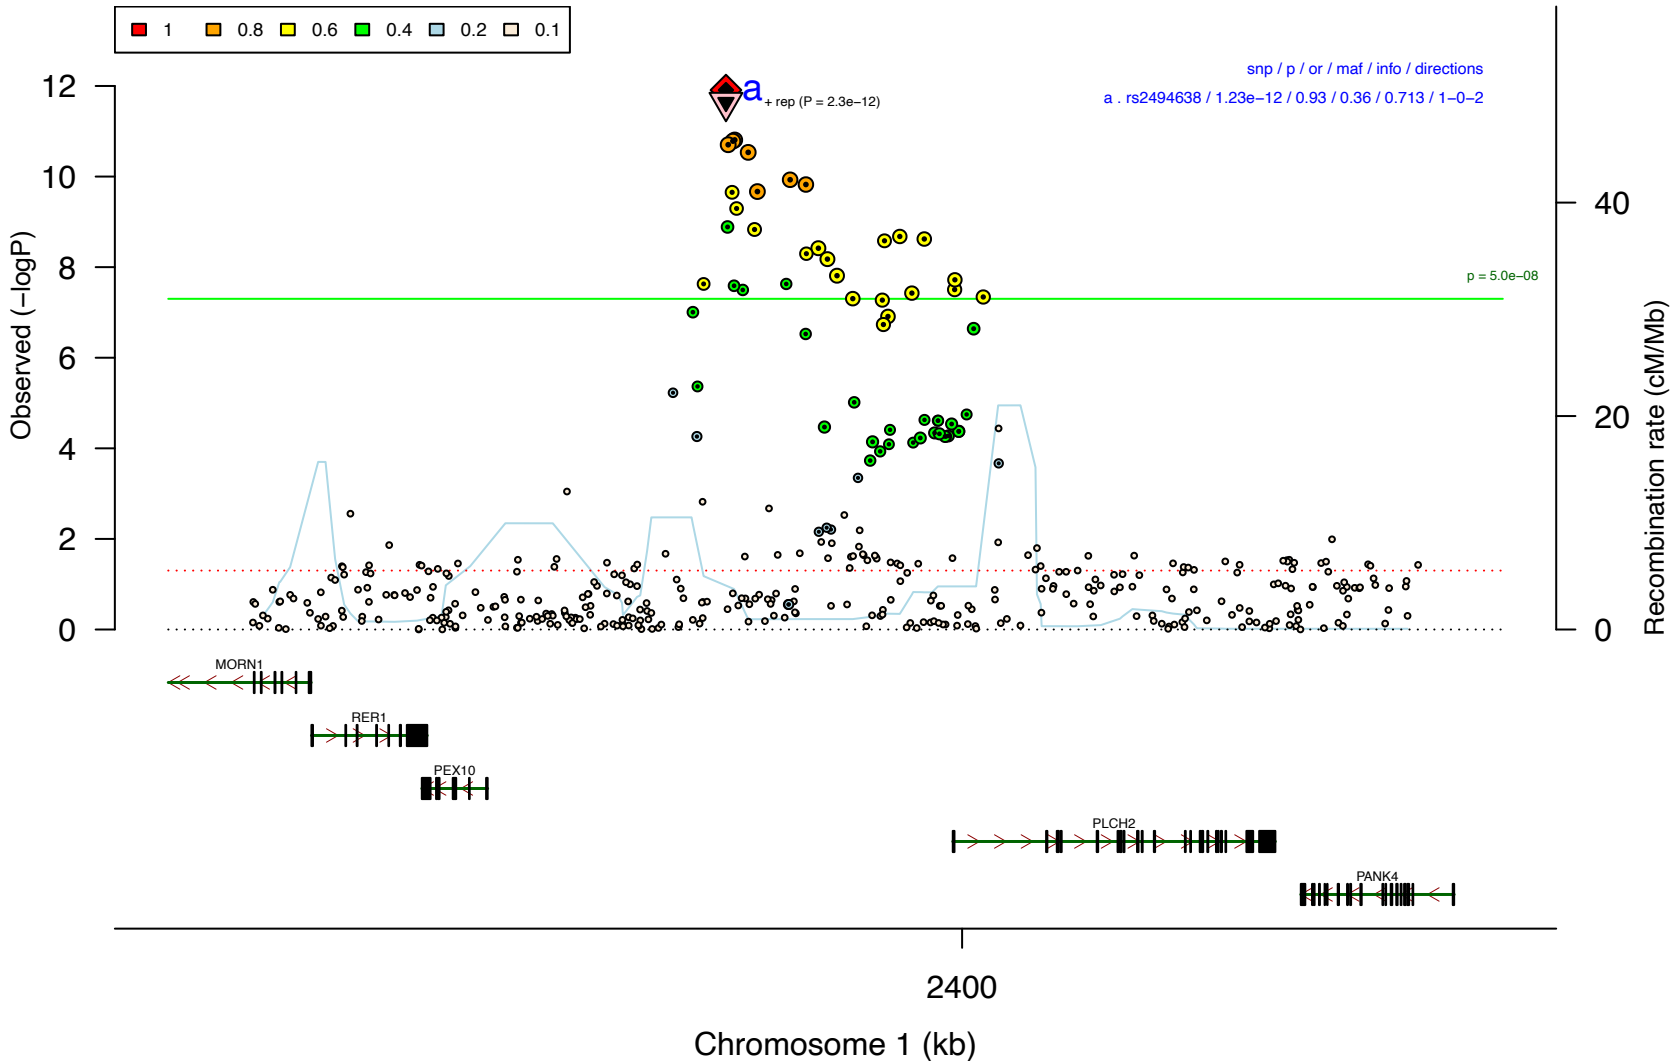

# PGC\_SCZ\_w3\_90\_0418b.68.chr9

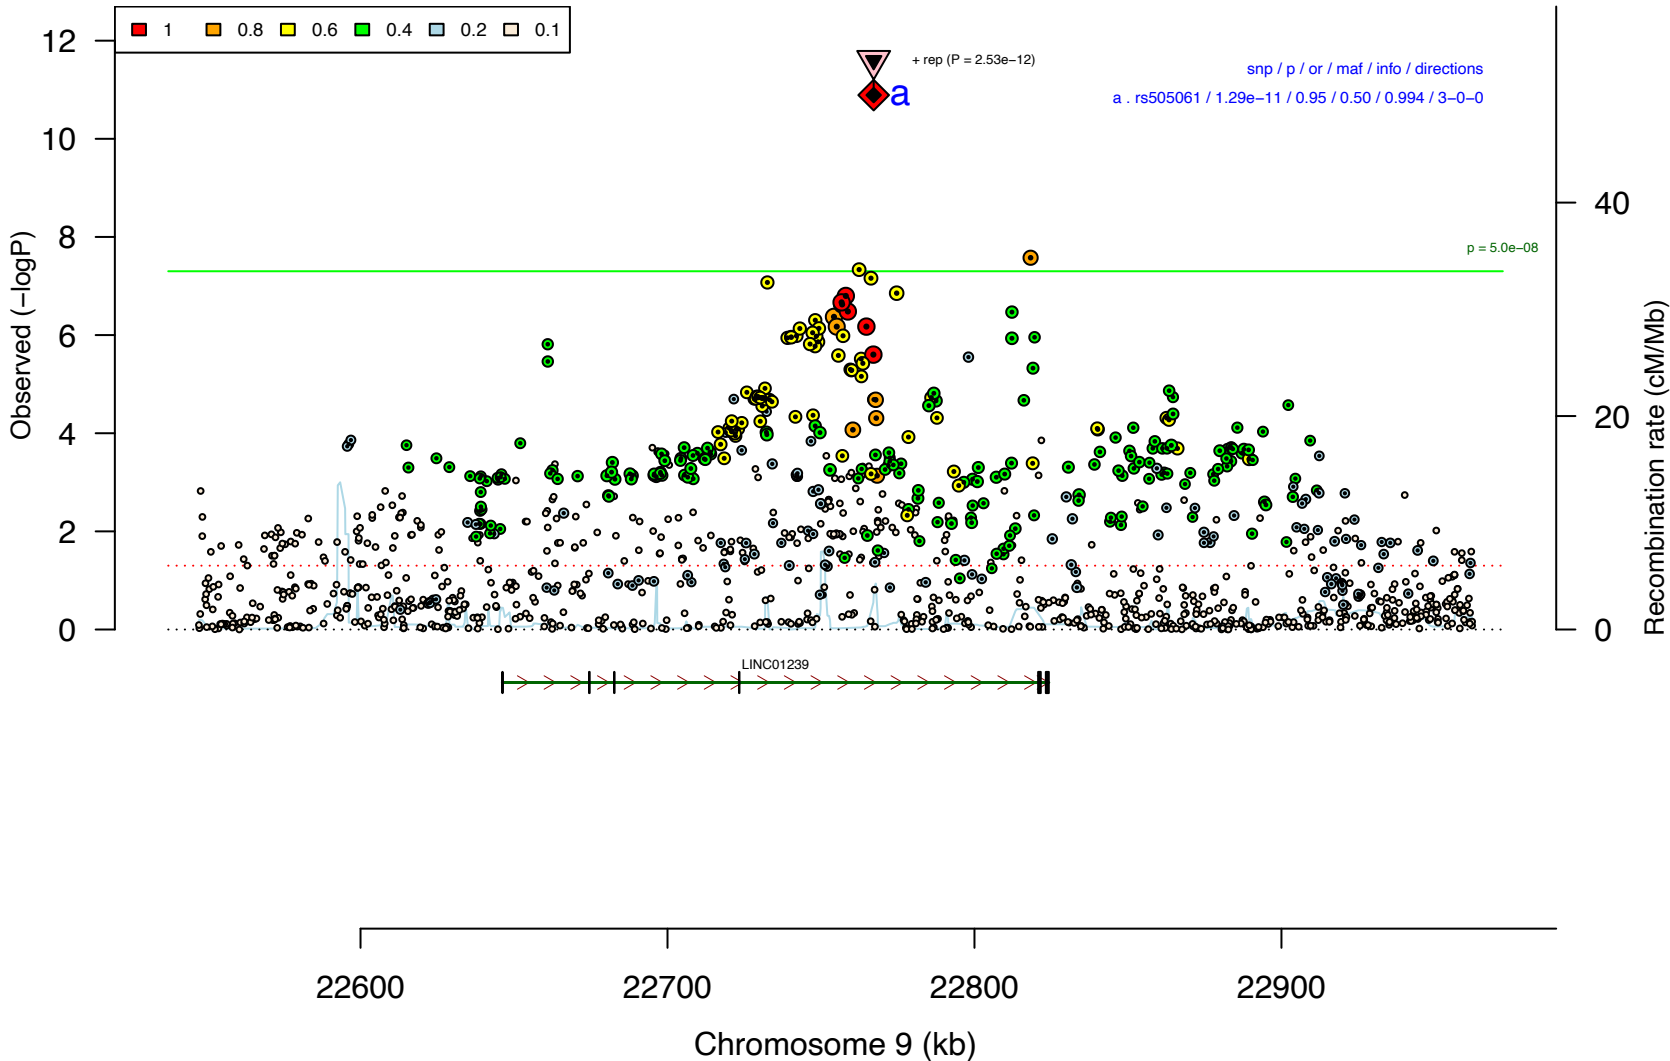



# PGC\_SCZ\_w3\_90\_0418b.69.chr6

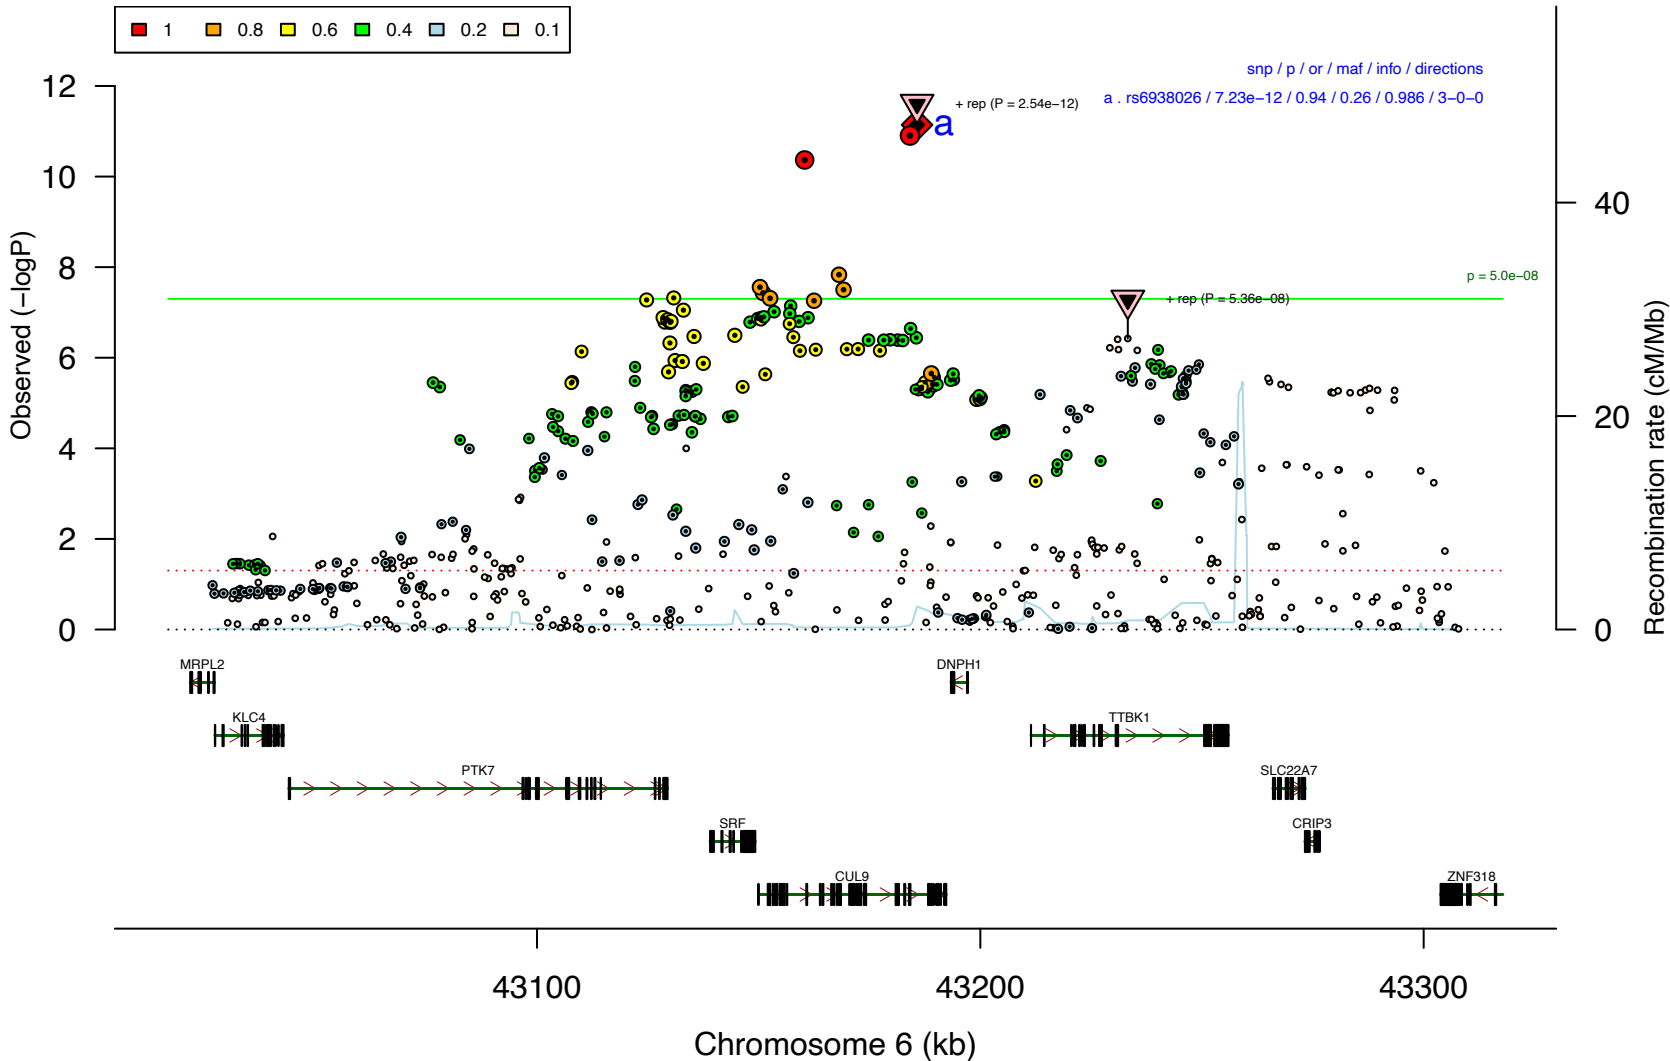

# PGC\_SCZ\_w3\_90\_0418b.70.chr17

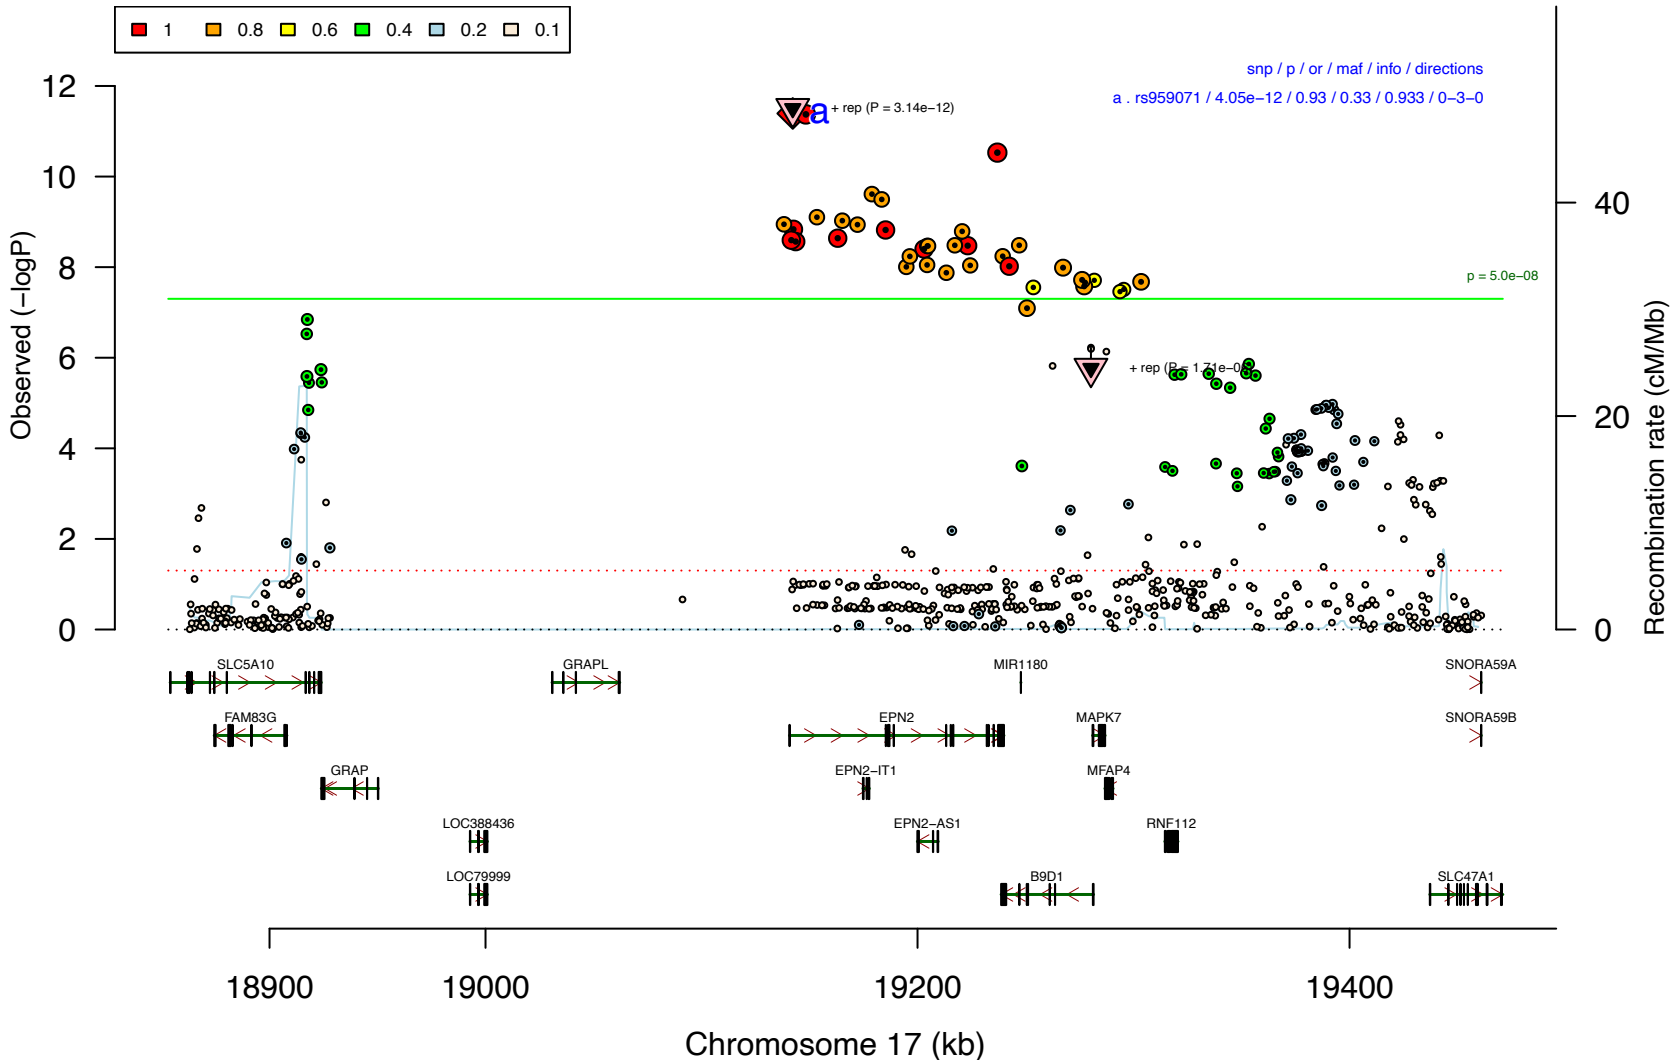

# PGC\_SCZ\_w3\_90\_0418b.71.chr11

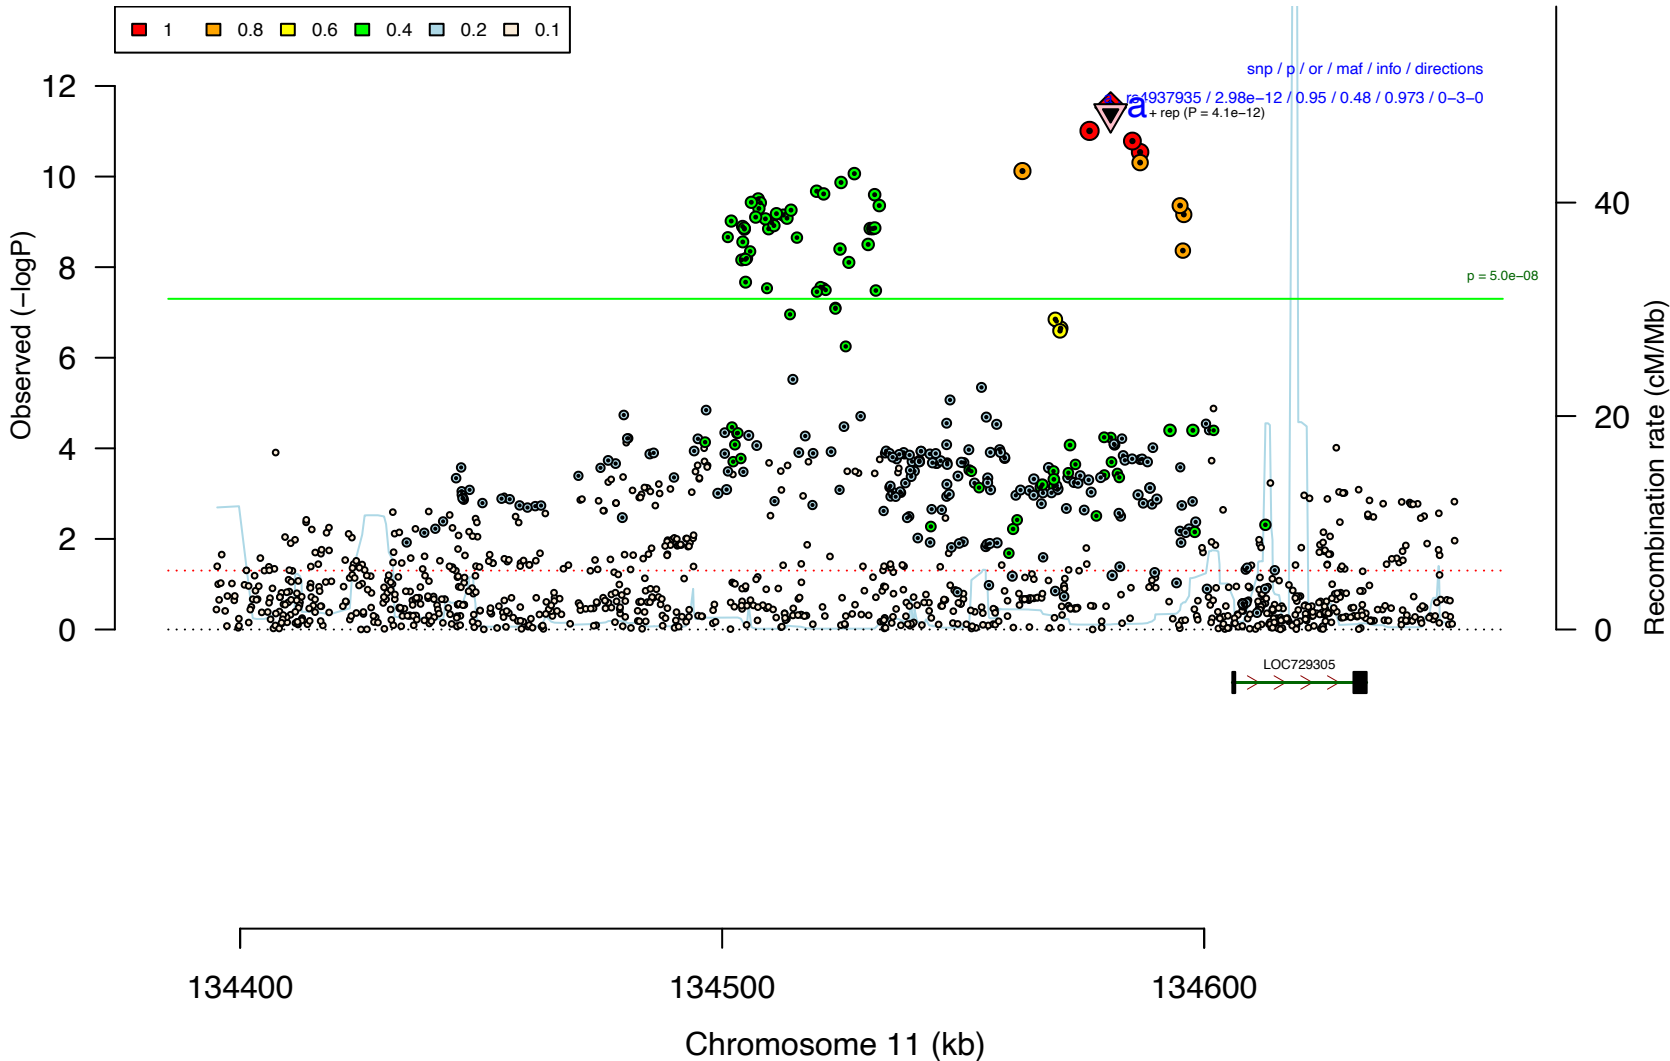

# PGC\_SCZ\_w3\_90\_0418b.72.chr7

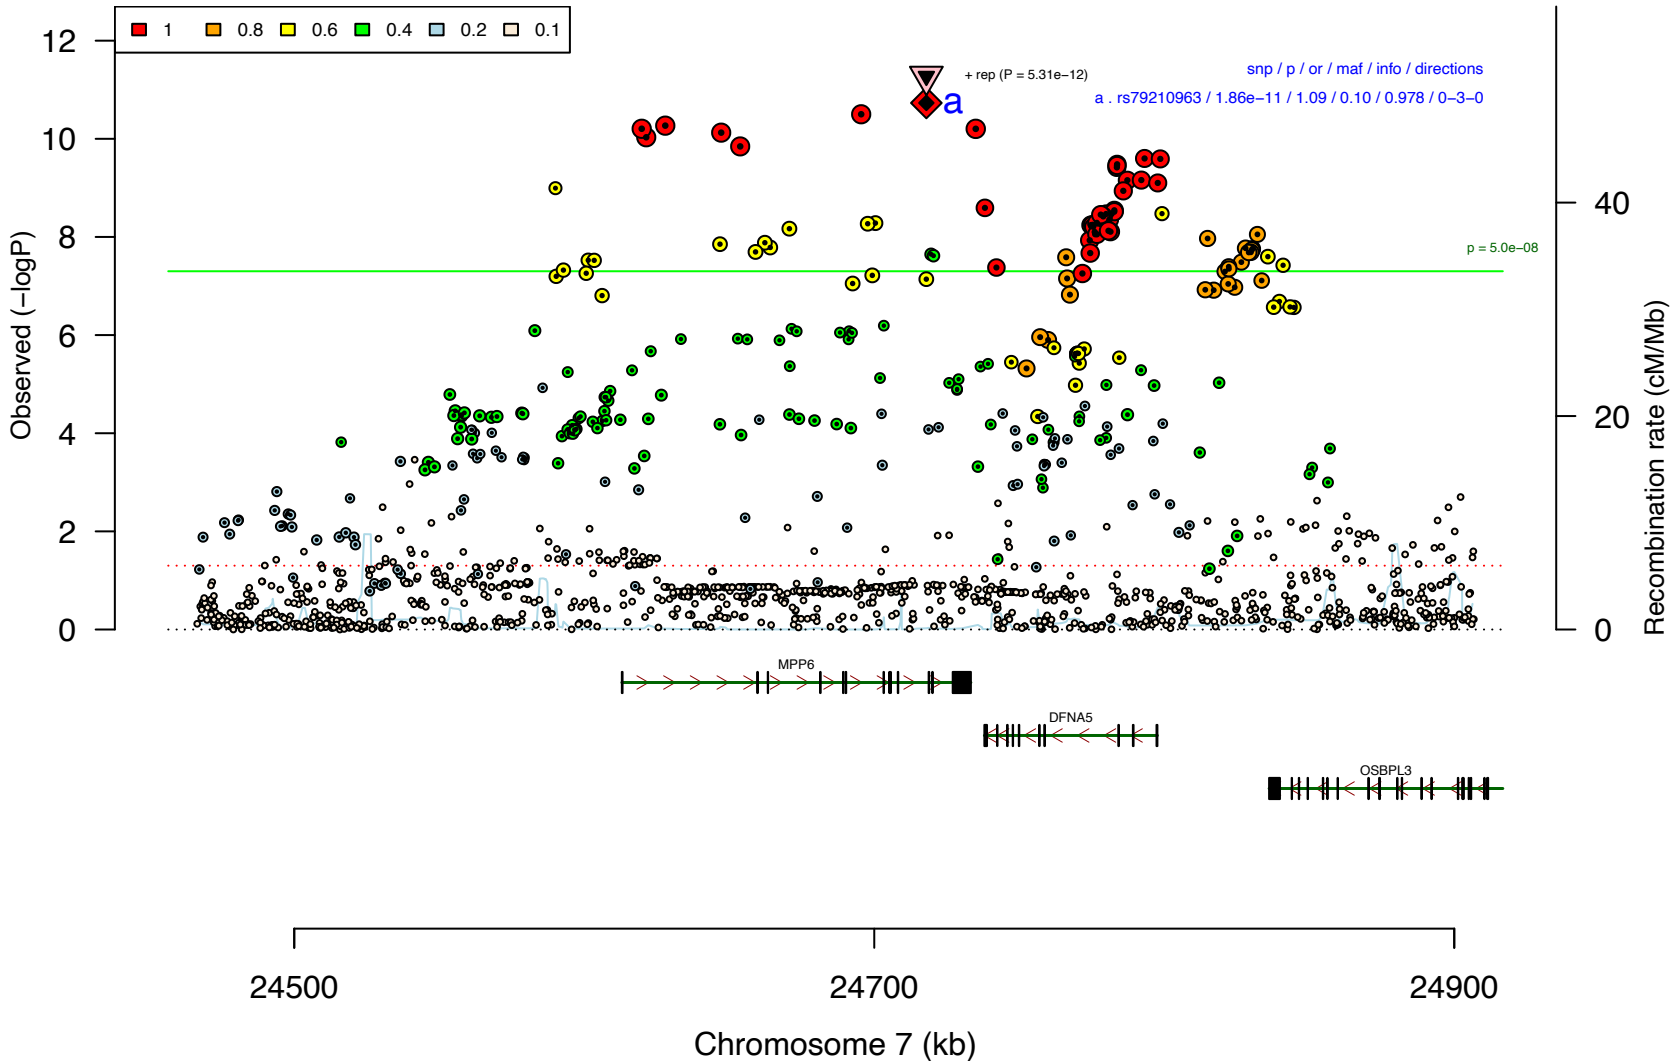

# PGC\_SCZ\_w3\_90\_0418b.73.chr11

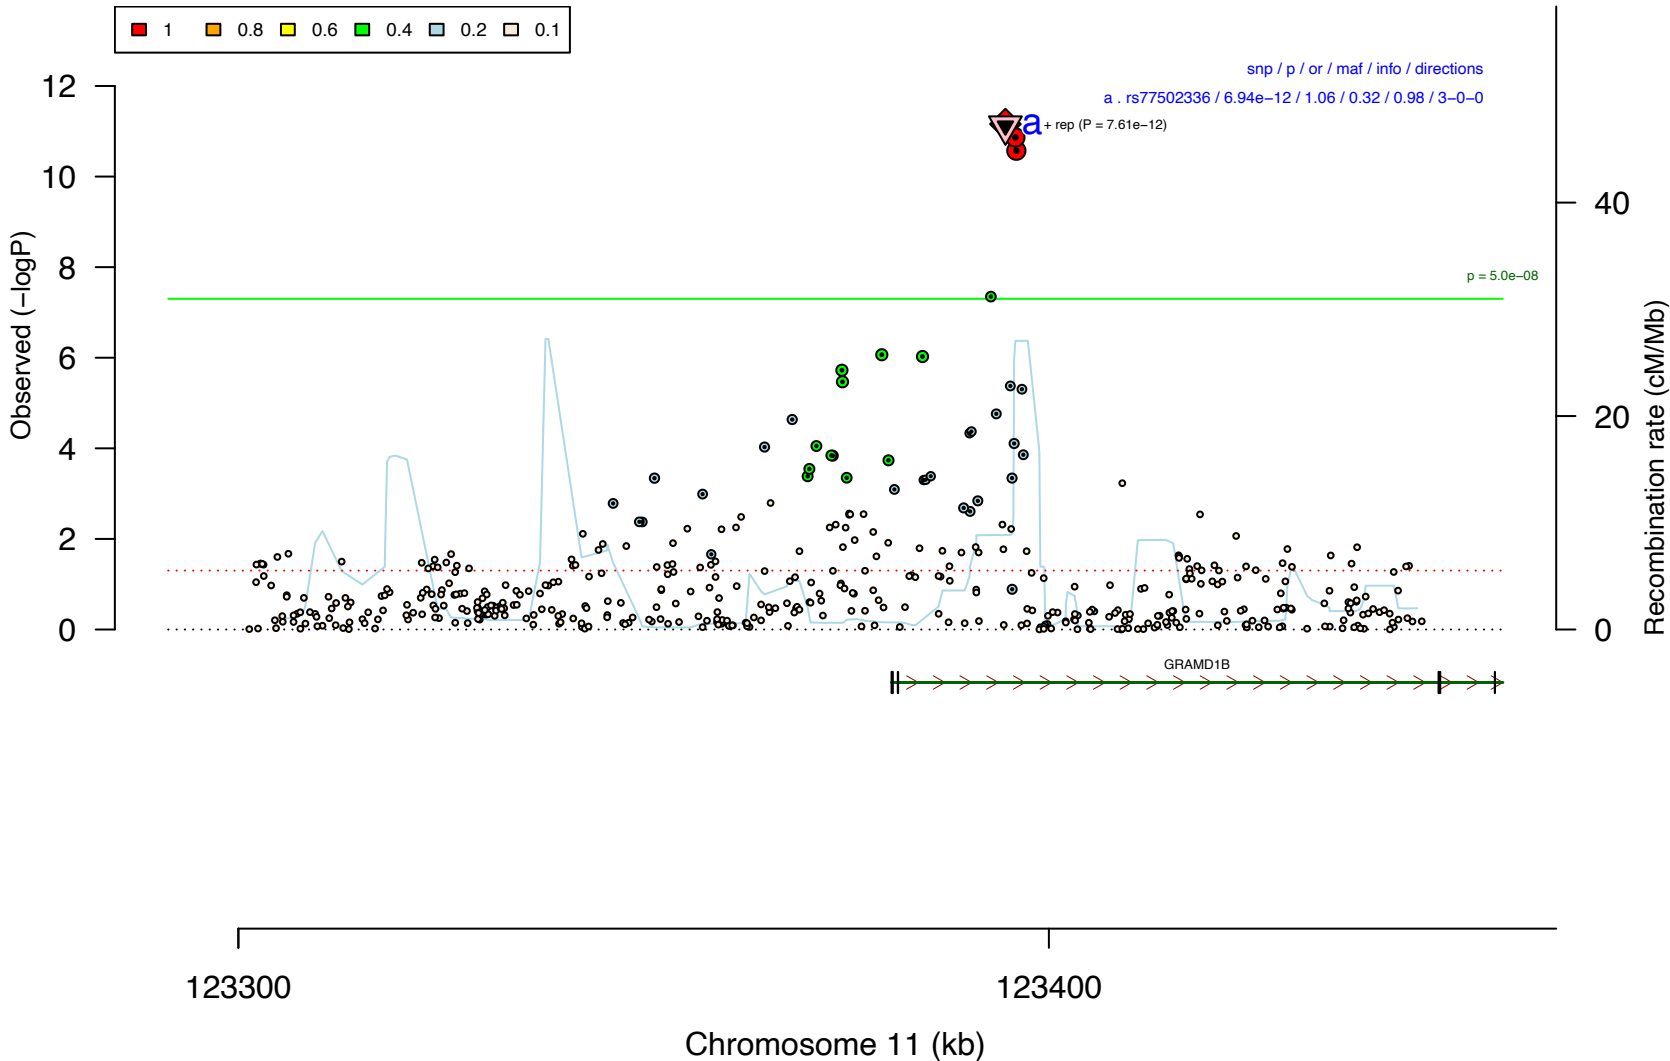

# PGC\_SCZ\_w3\_90\_0418b.74.chr3

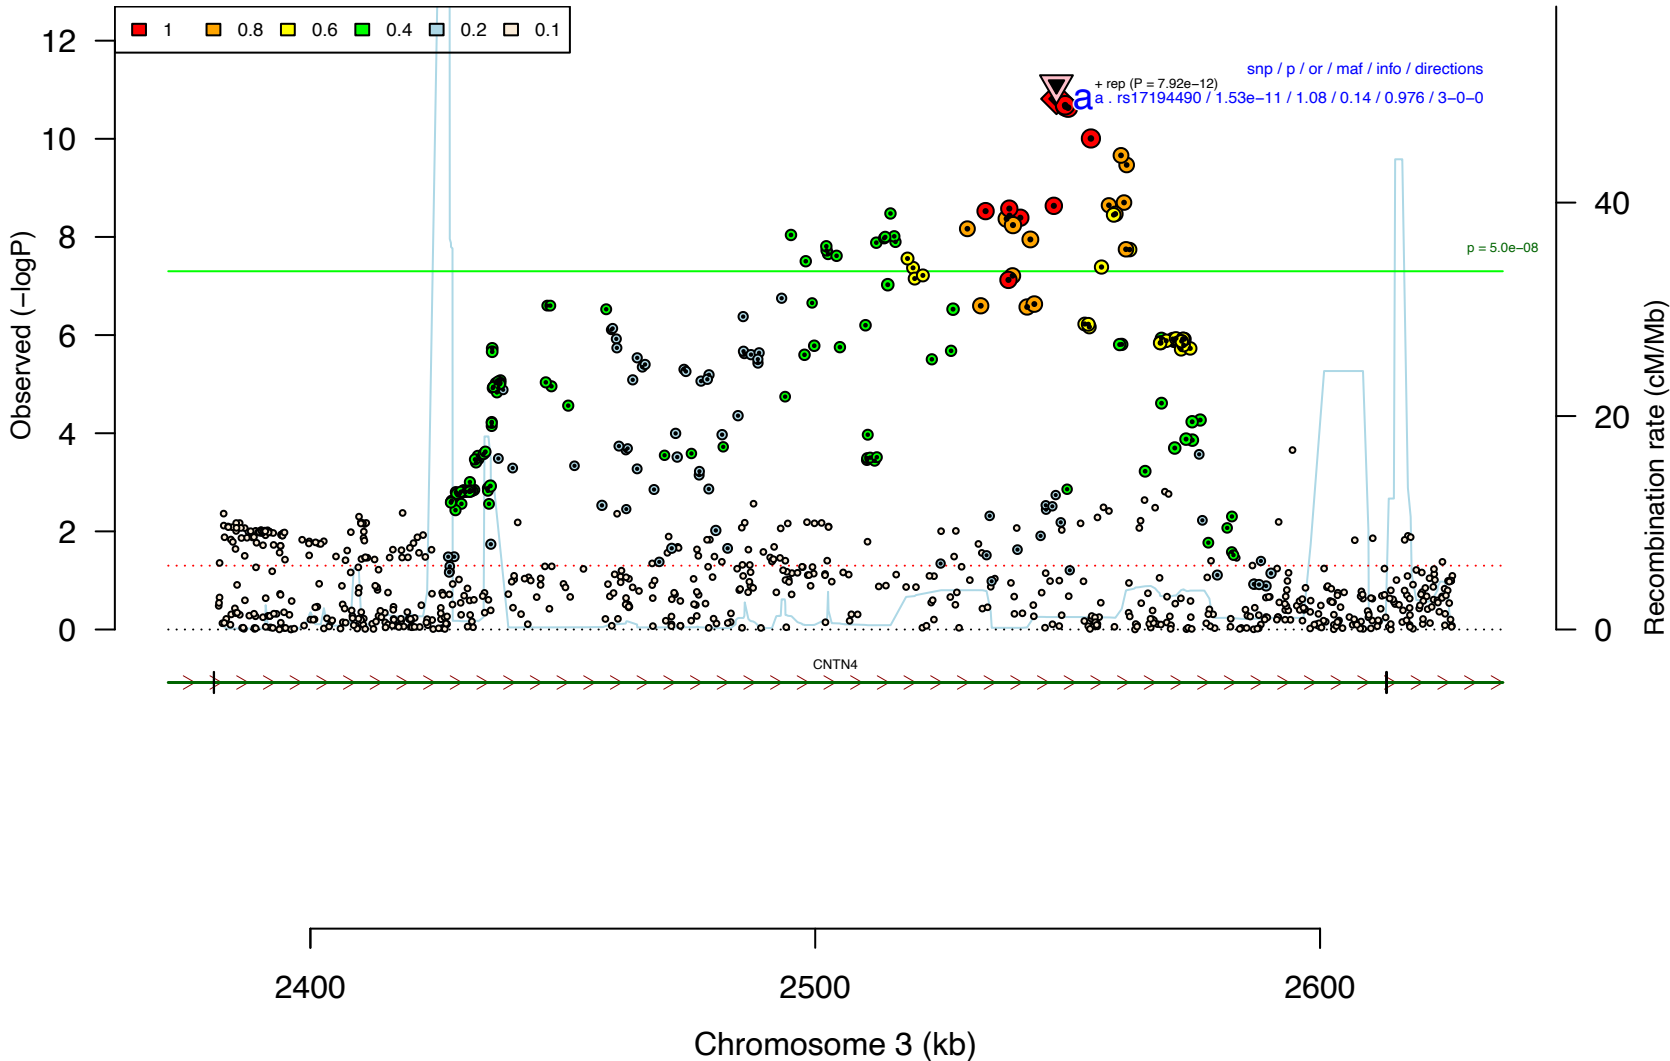

# PGC\_SCZ\_w3\_90\_0418b.75.chr4

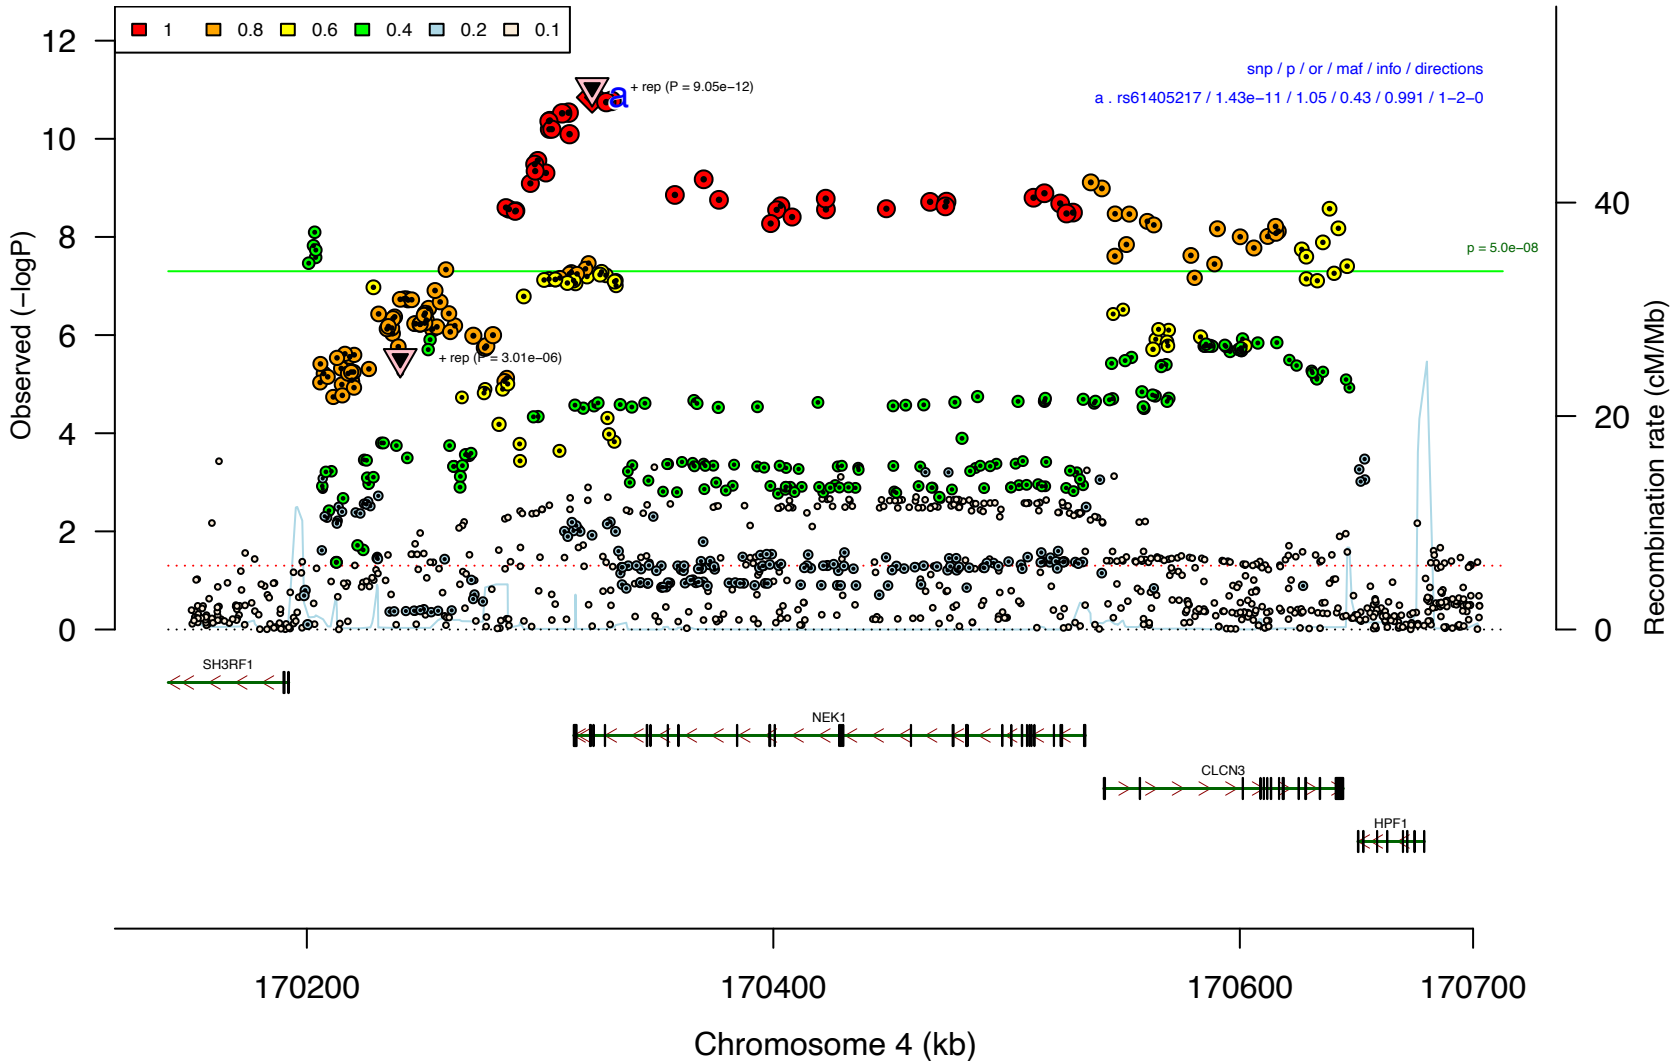

# PGC\_SCZ\_w3\_90\_0418b.76.chr16

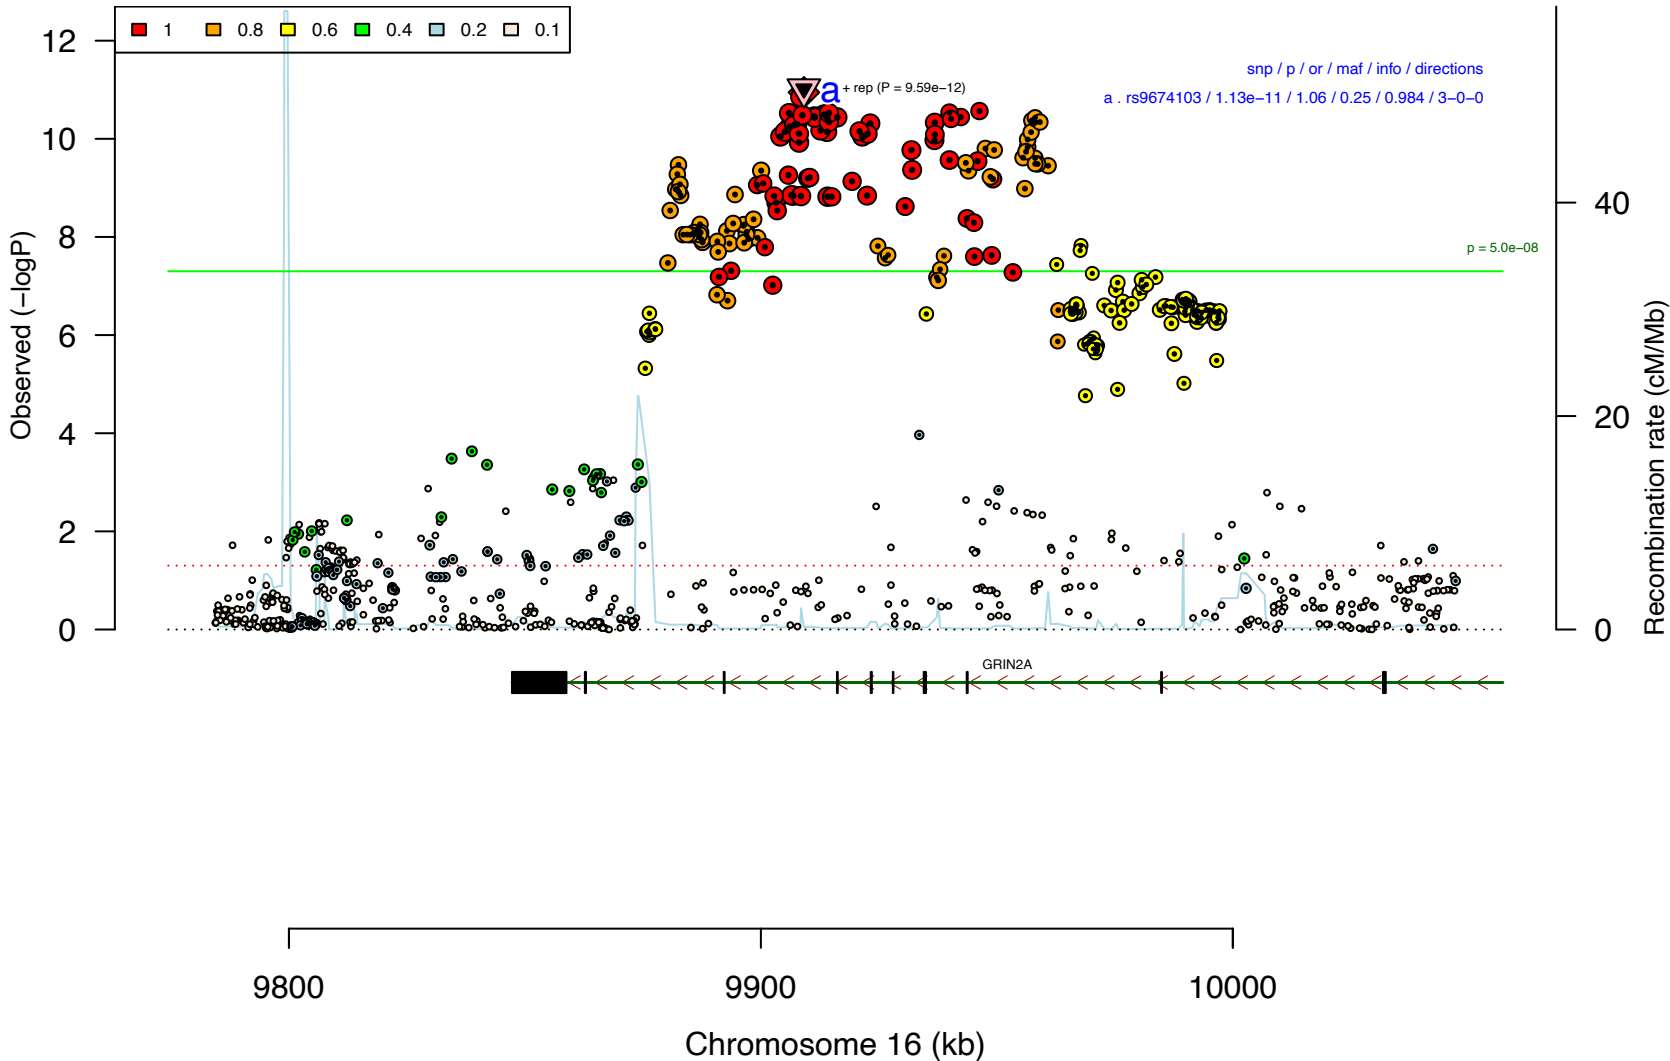



# PGC\_SCZ\_w3\_90\_0418b.77.chr15

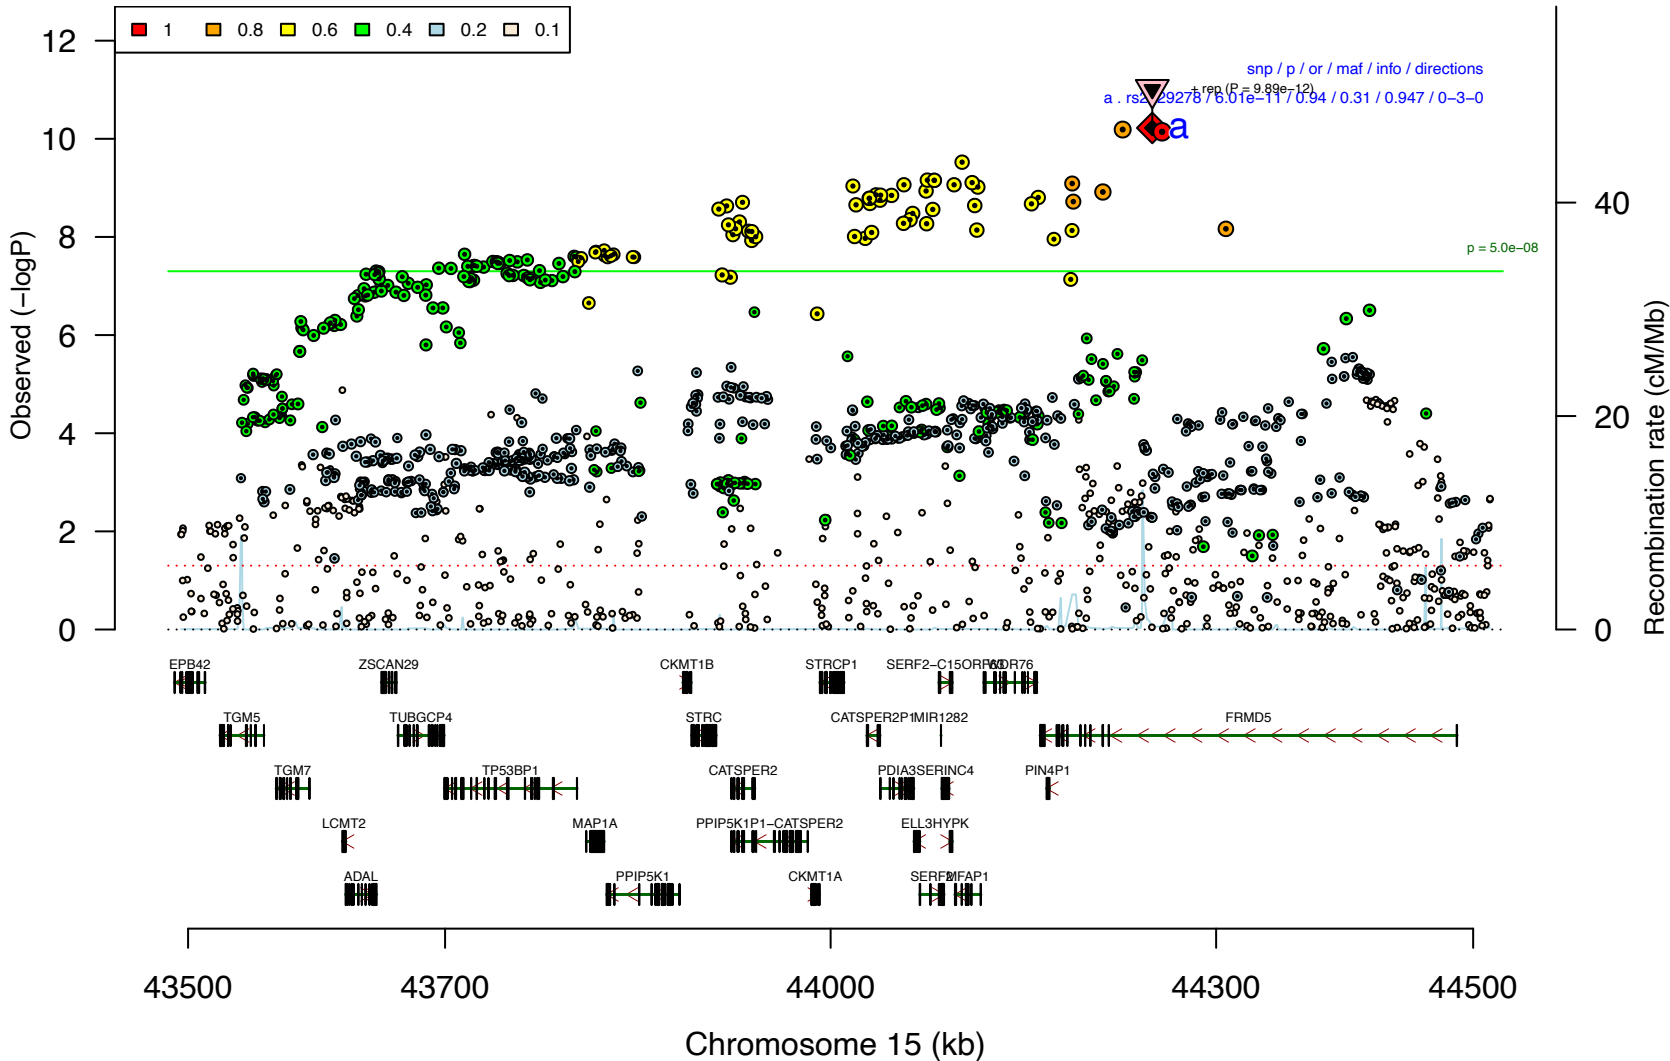

# PGC\_SCZ\_w3\_90\_0418b.78.chr8

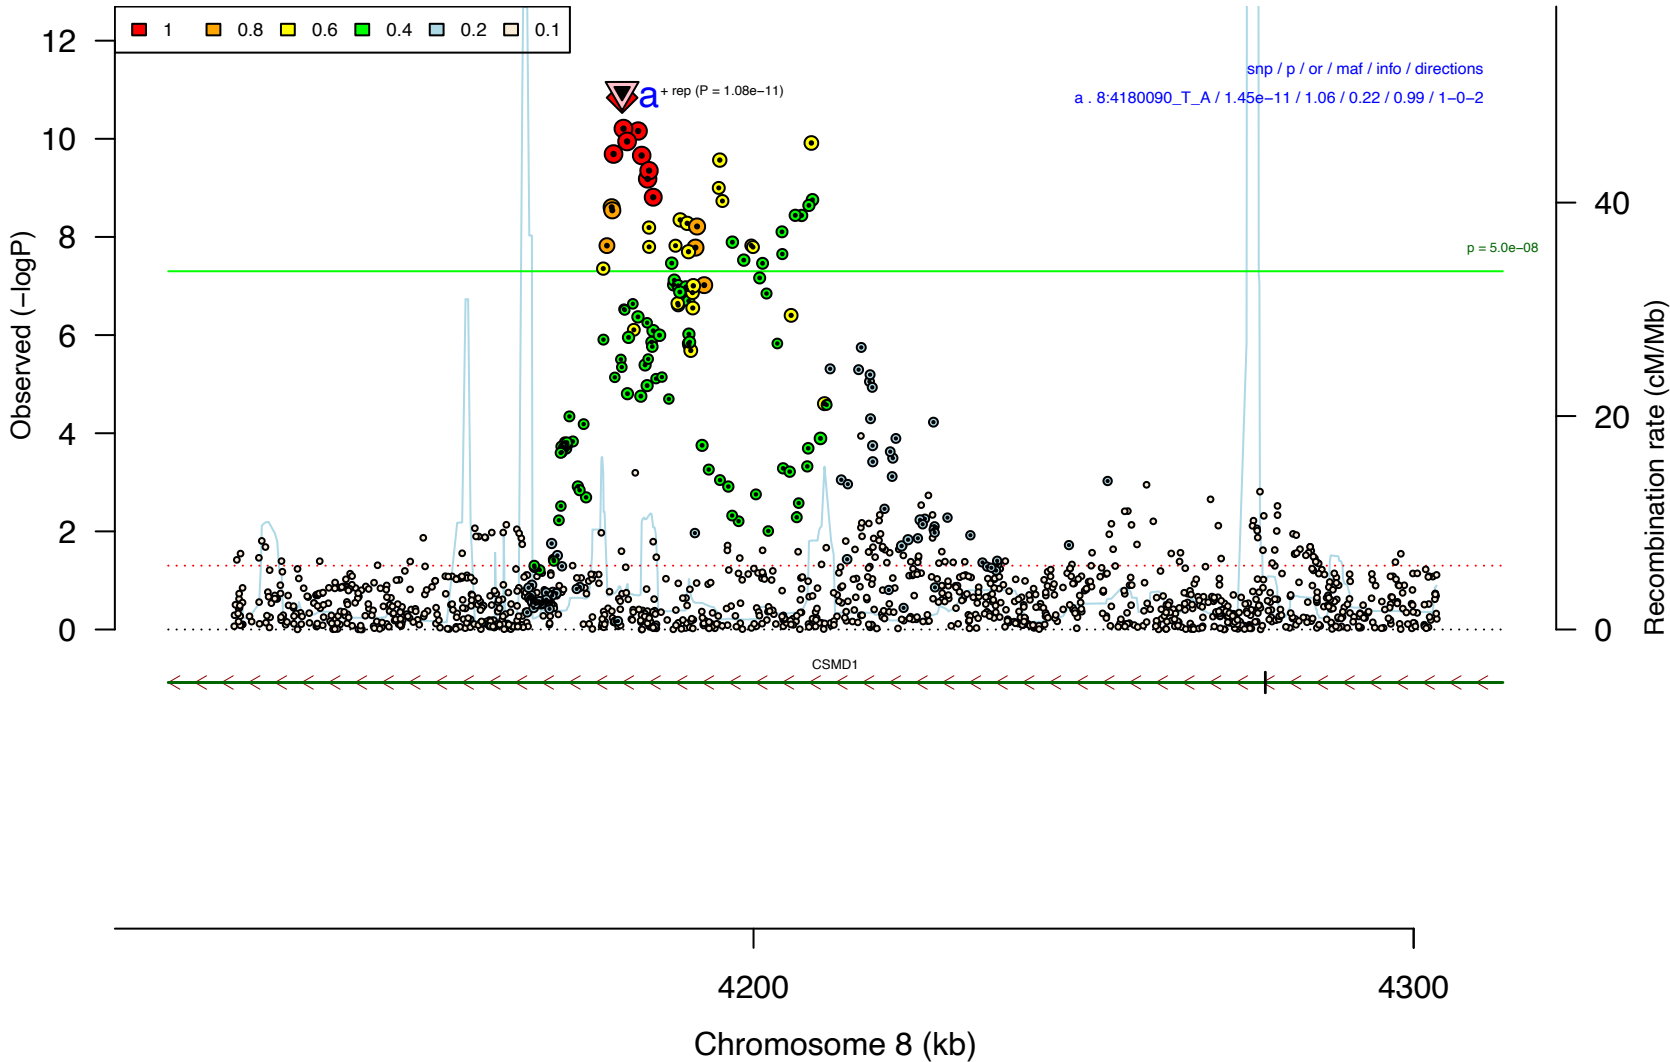

# PGC\_SCZ\_w3\_90\_0418b.79.chr8

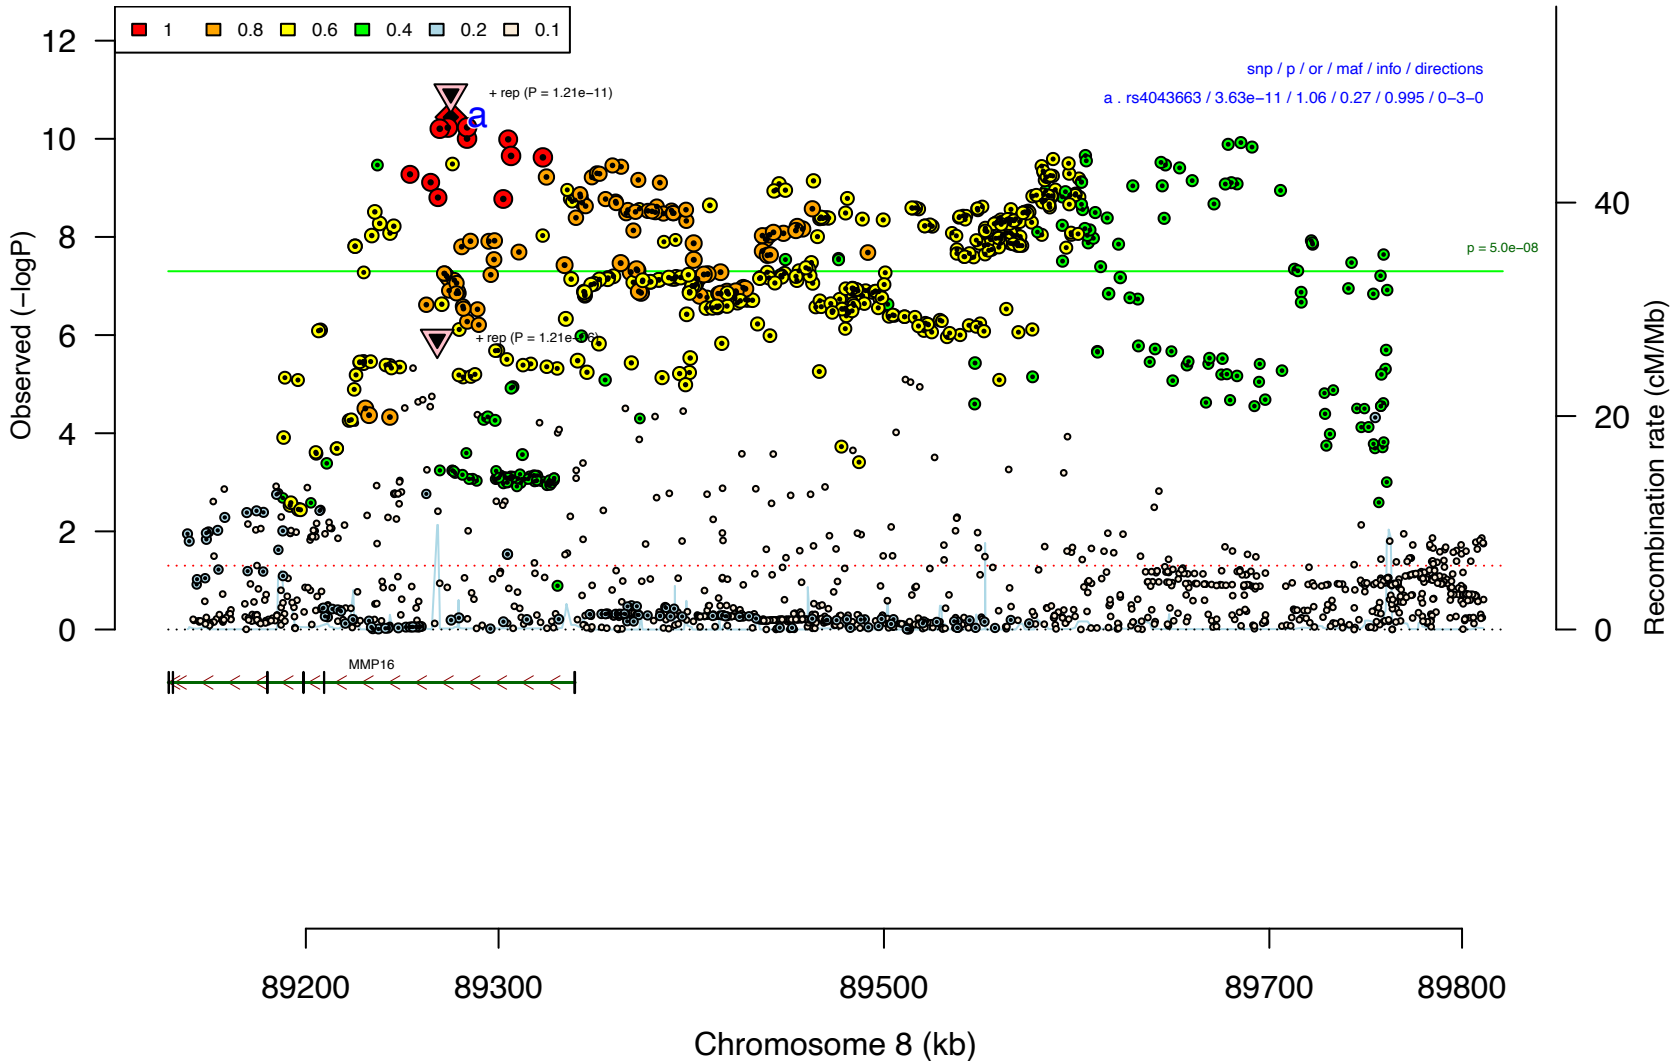

# PGC\_SCZ\_w3\_90\_0418b.80.chr5

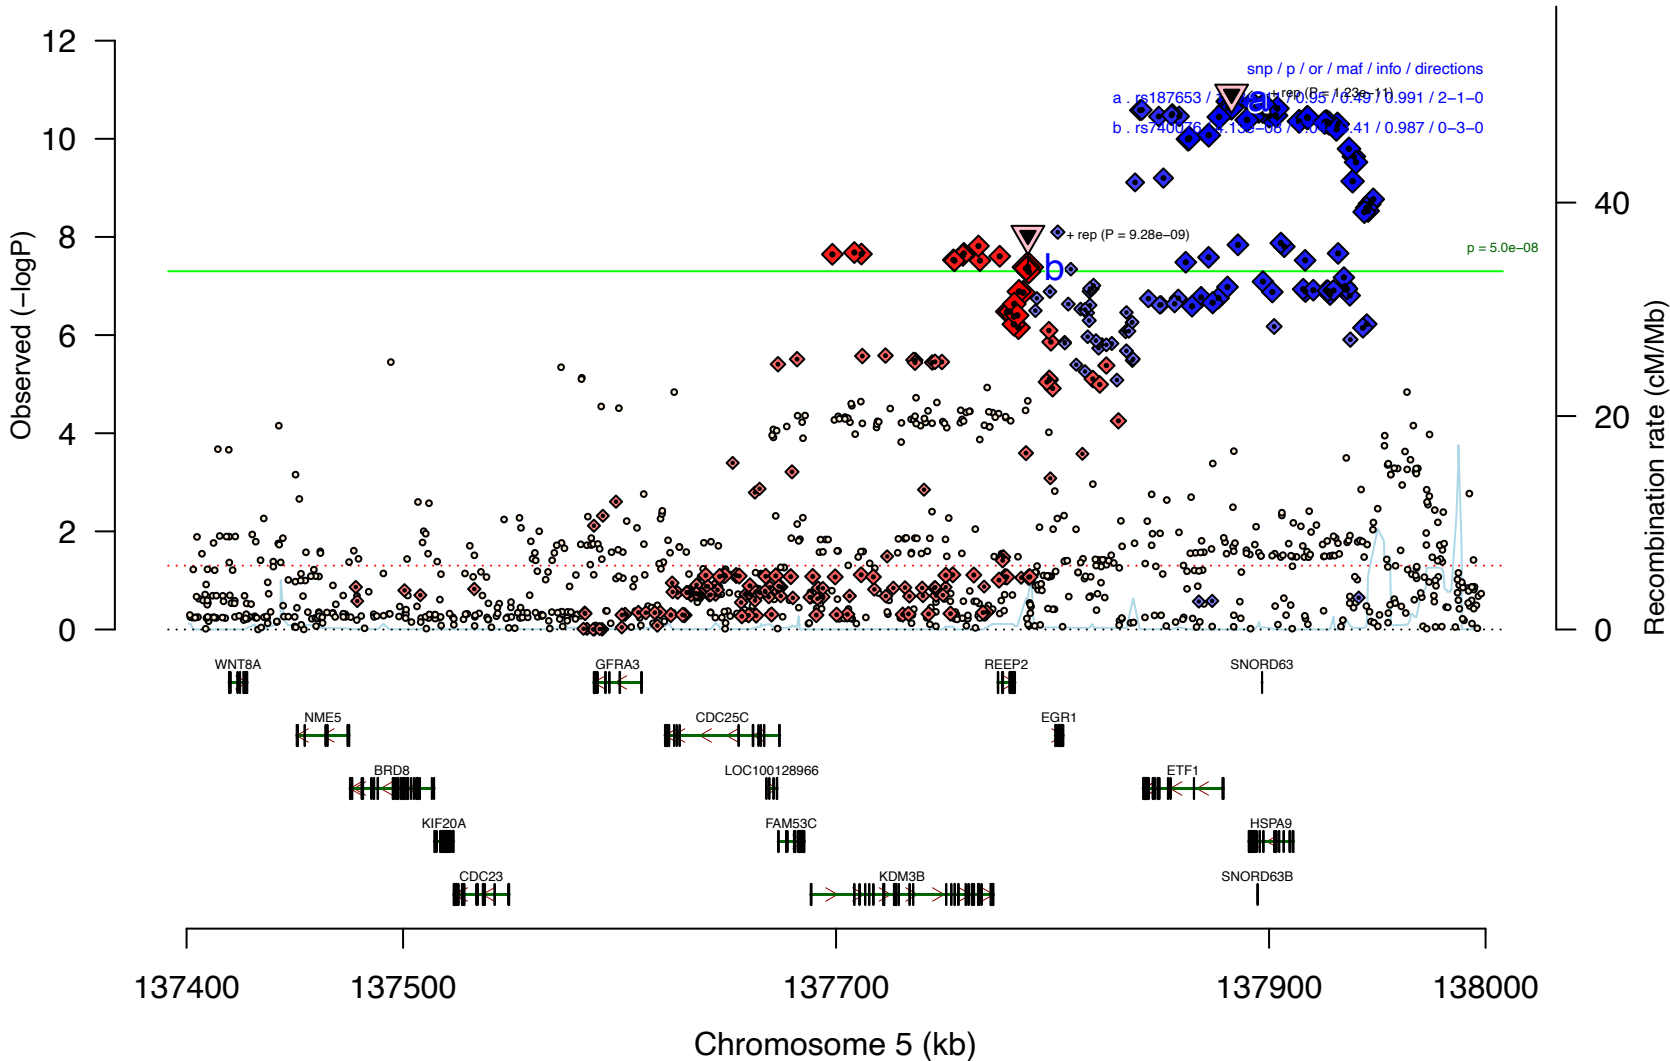

# PGC\_SCZ\_w3\_90\_0418b.81.chr3

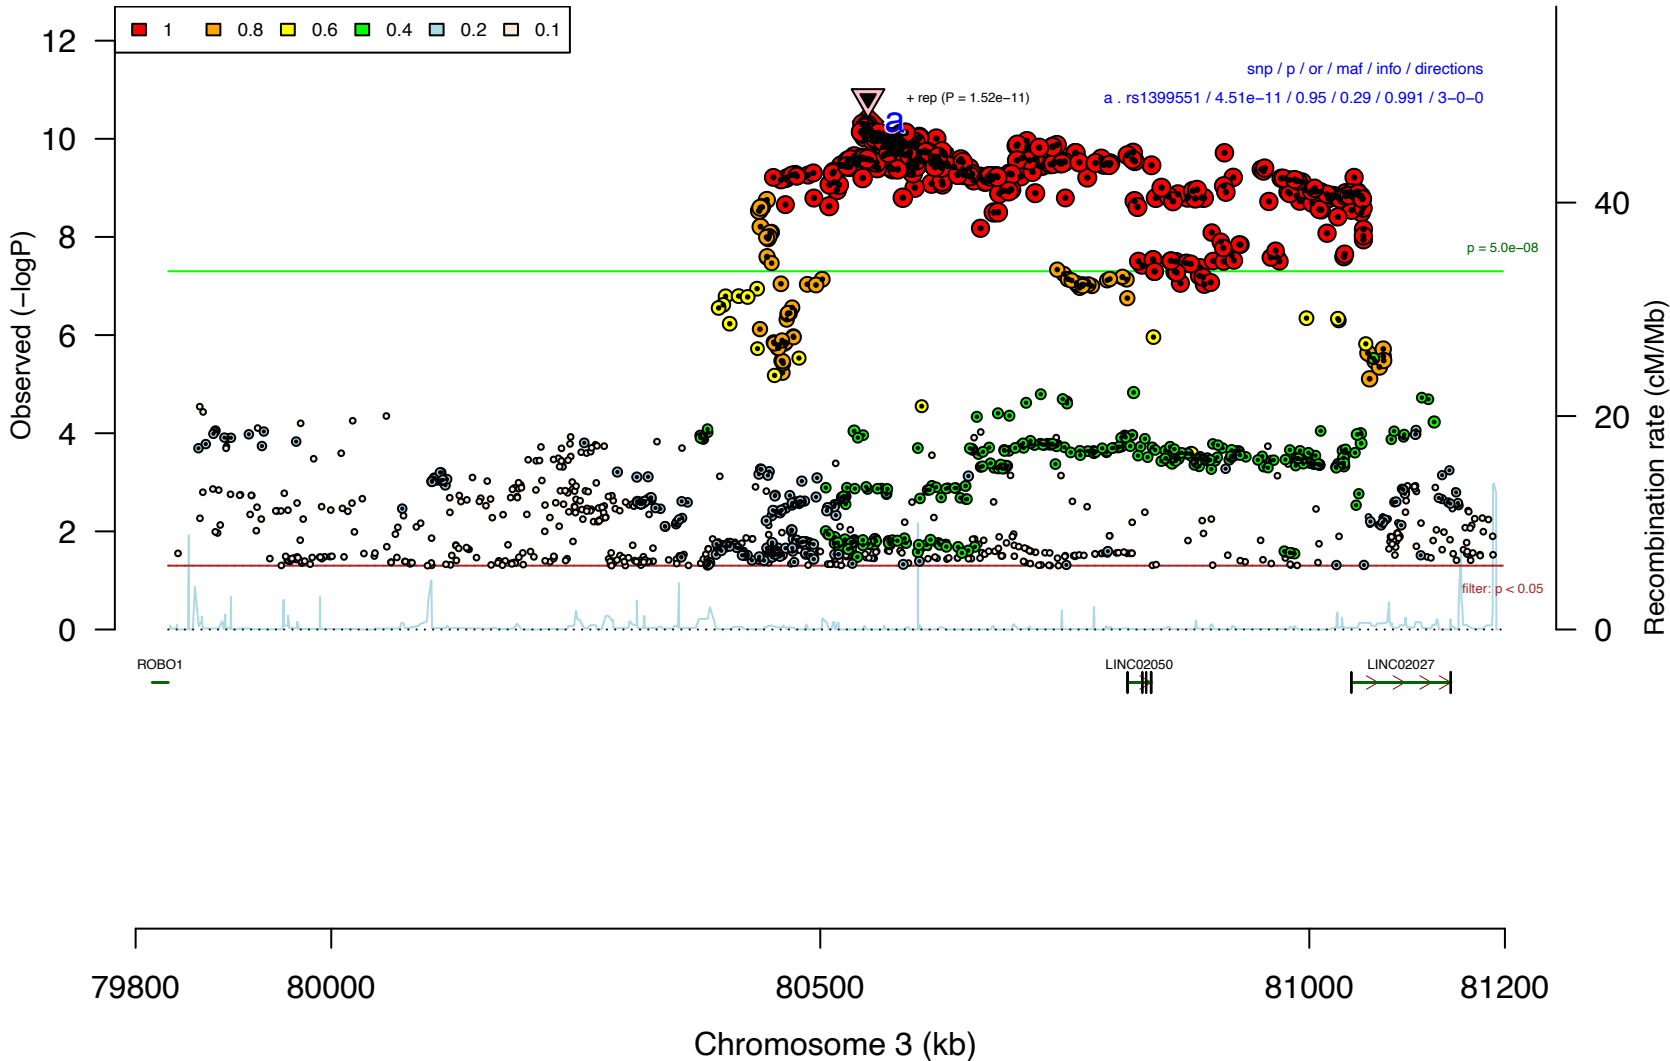

# PGC\_SCZ\_w3\_90\_0418b.82.chr15

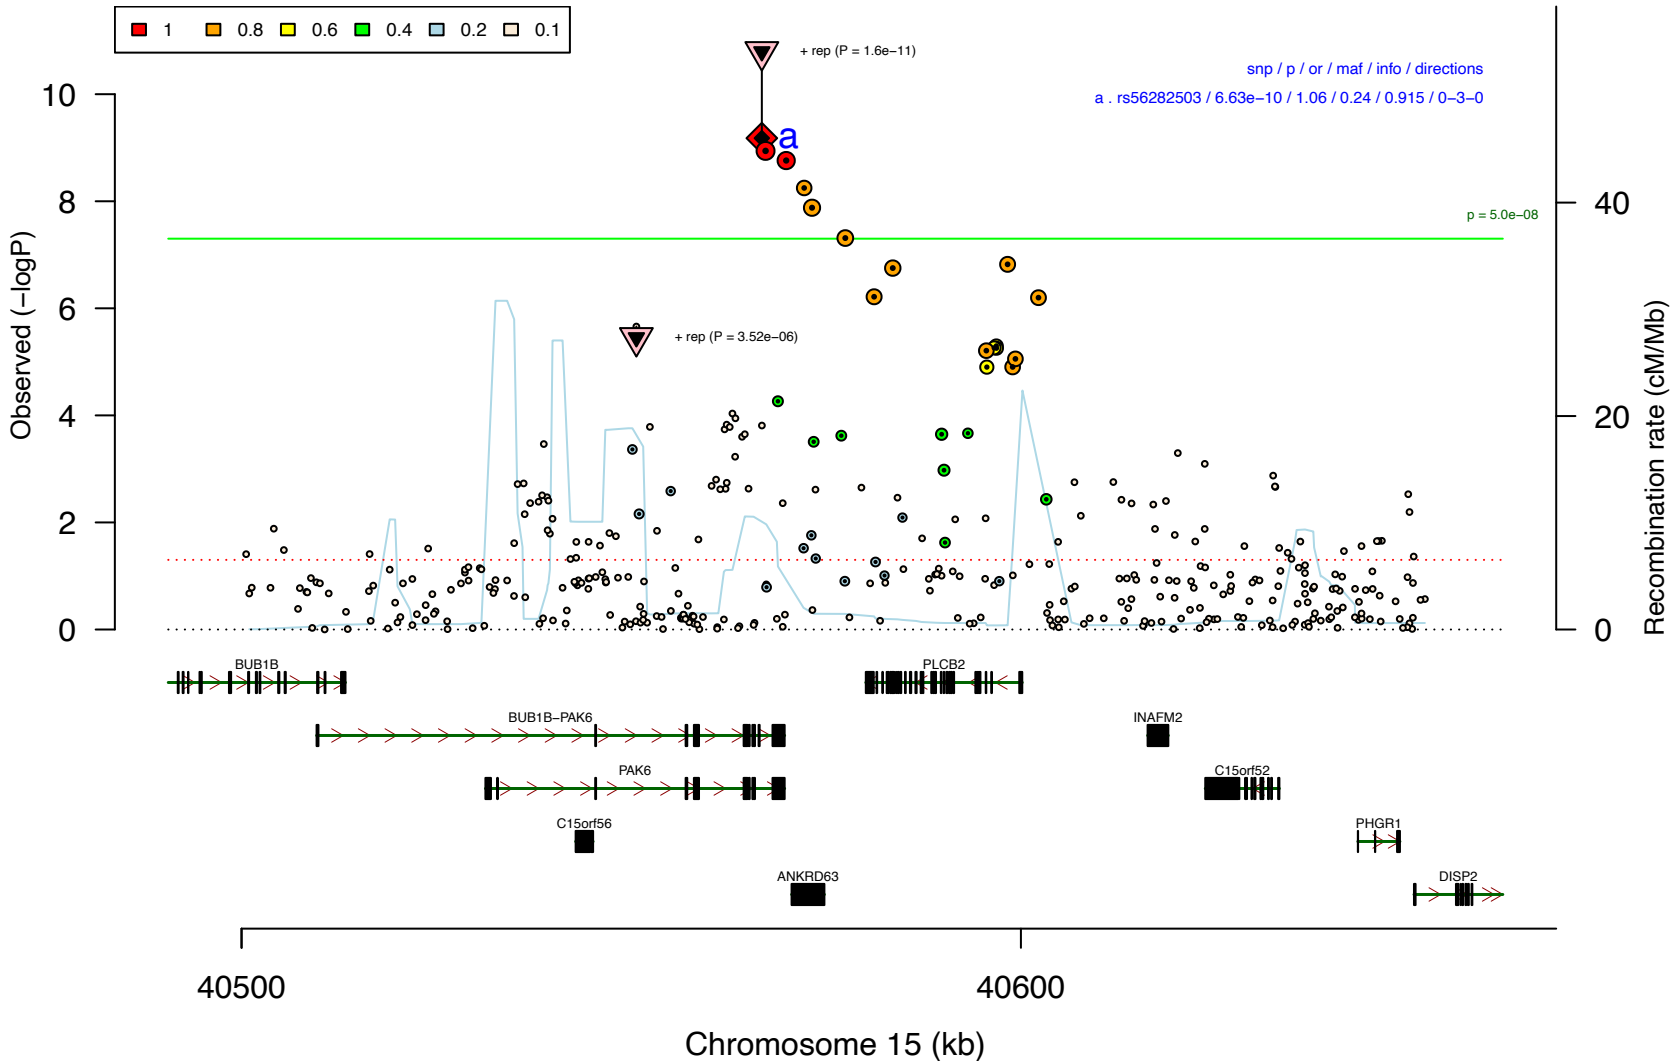

# PGC\_SCZ\_w3\_90\_0418b.83.chr8

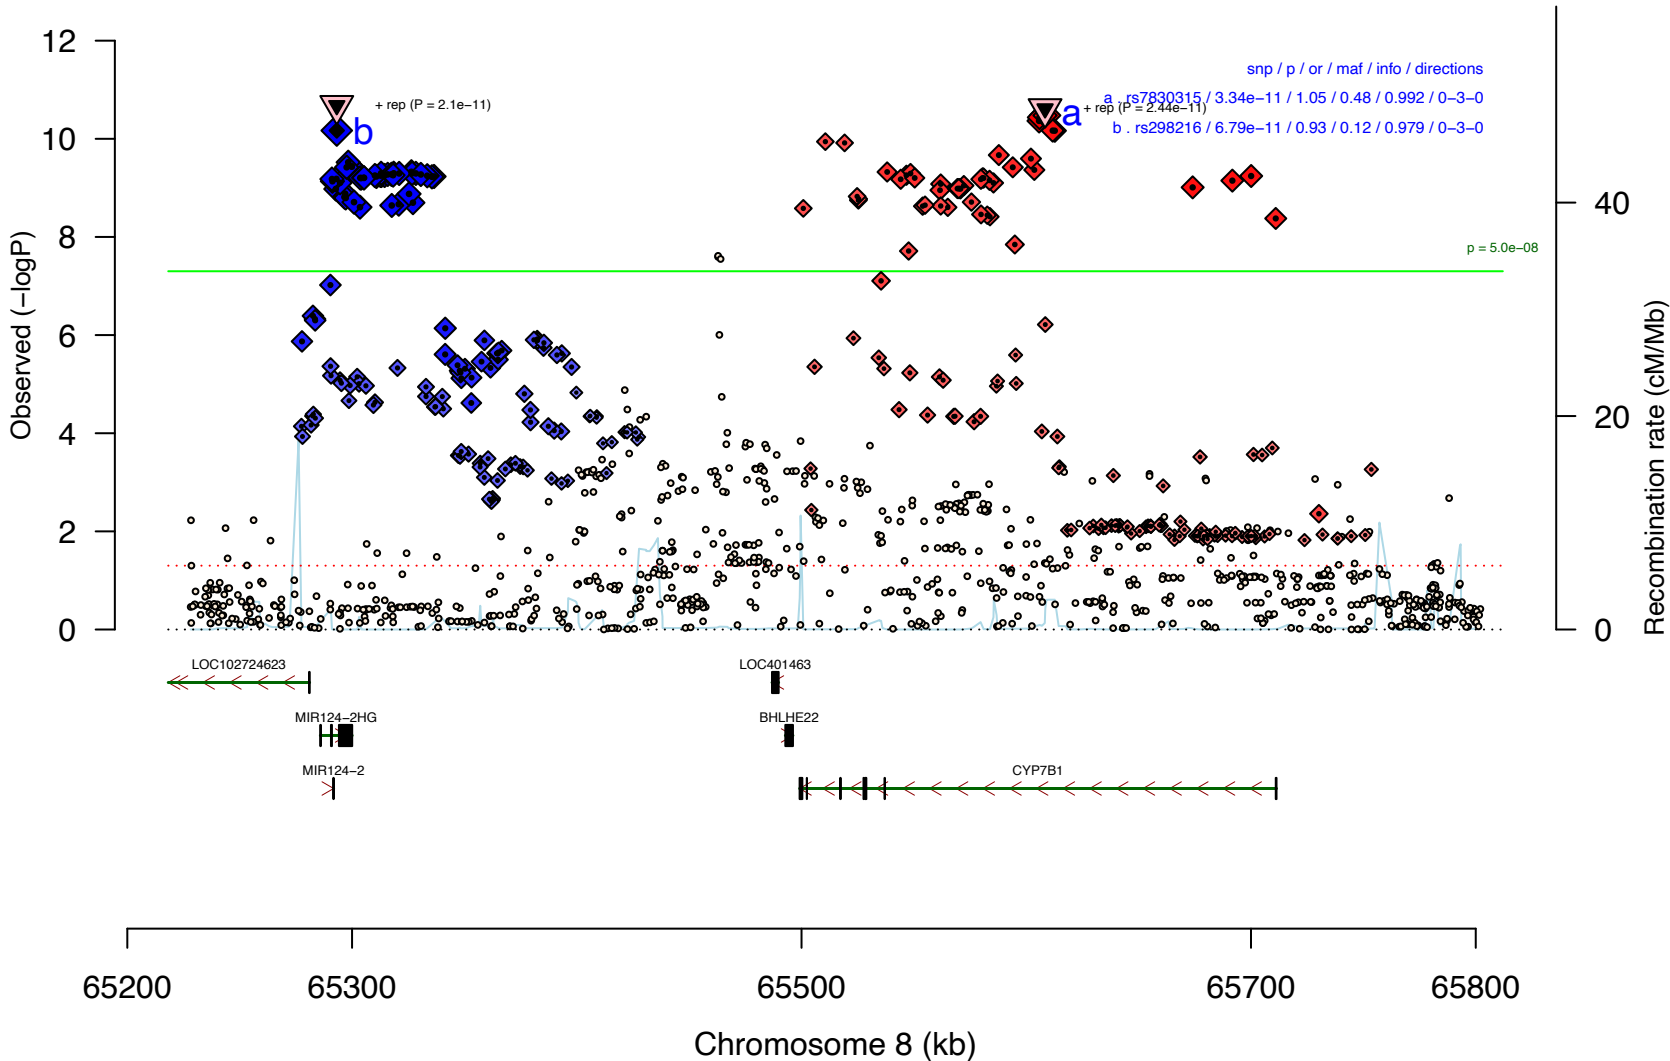

# PGC\_SCZ\_w3\_90\_0418b.84.chr3

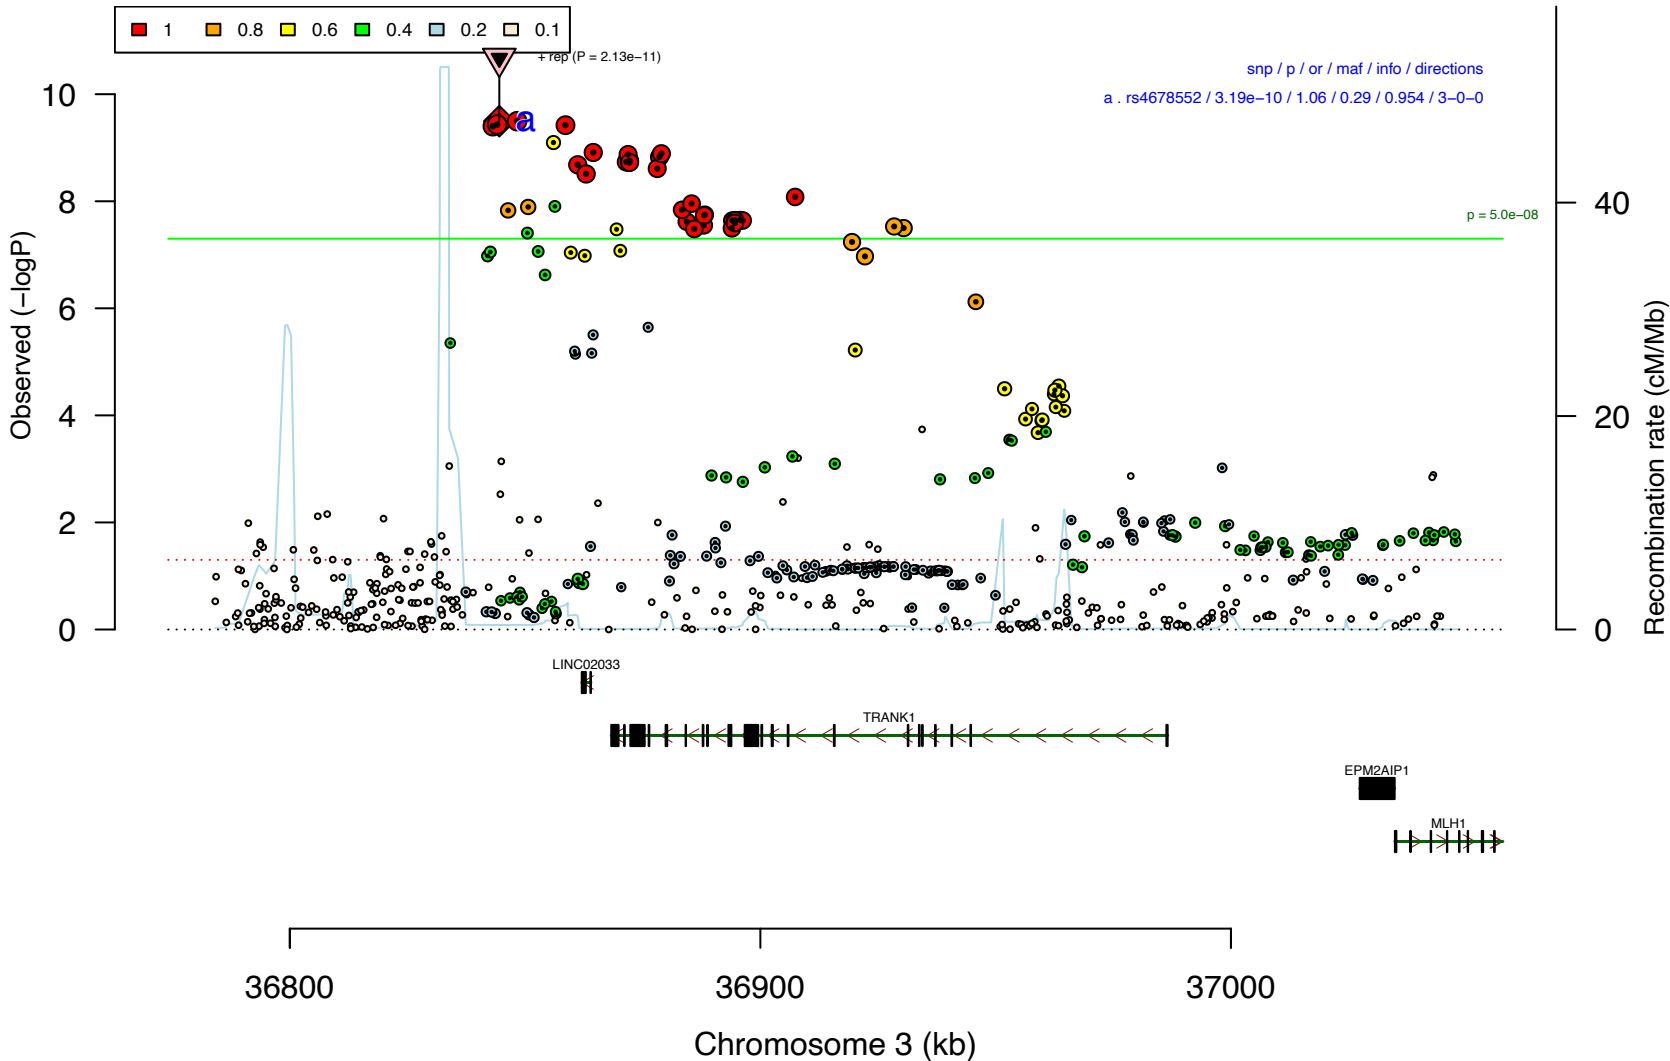



# PGC\_SCZ\_w3\_90\_0418b.85.chr13

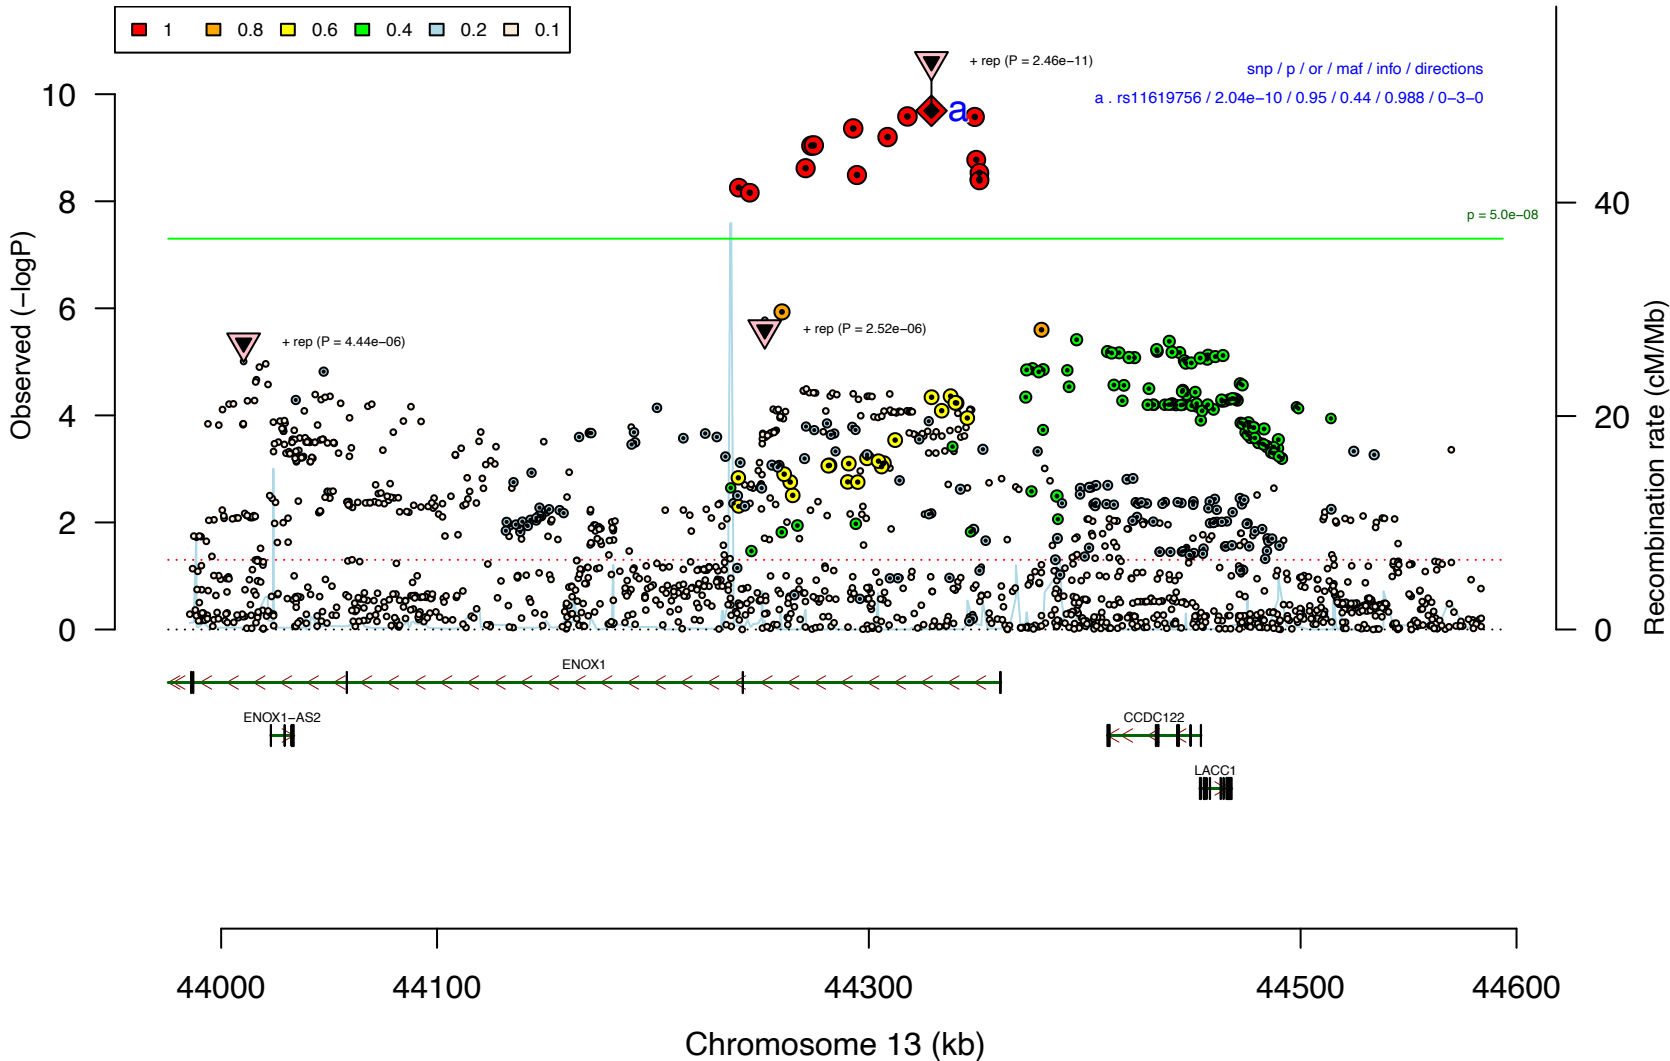

# PGC\_SCZ\_w3\_90\_0418b.86.chr7

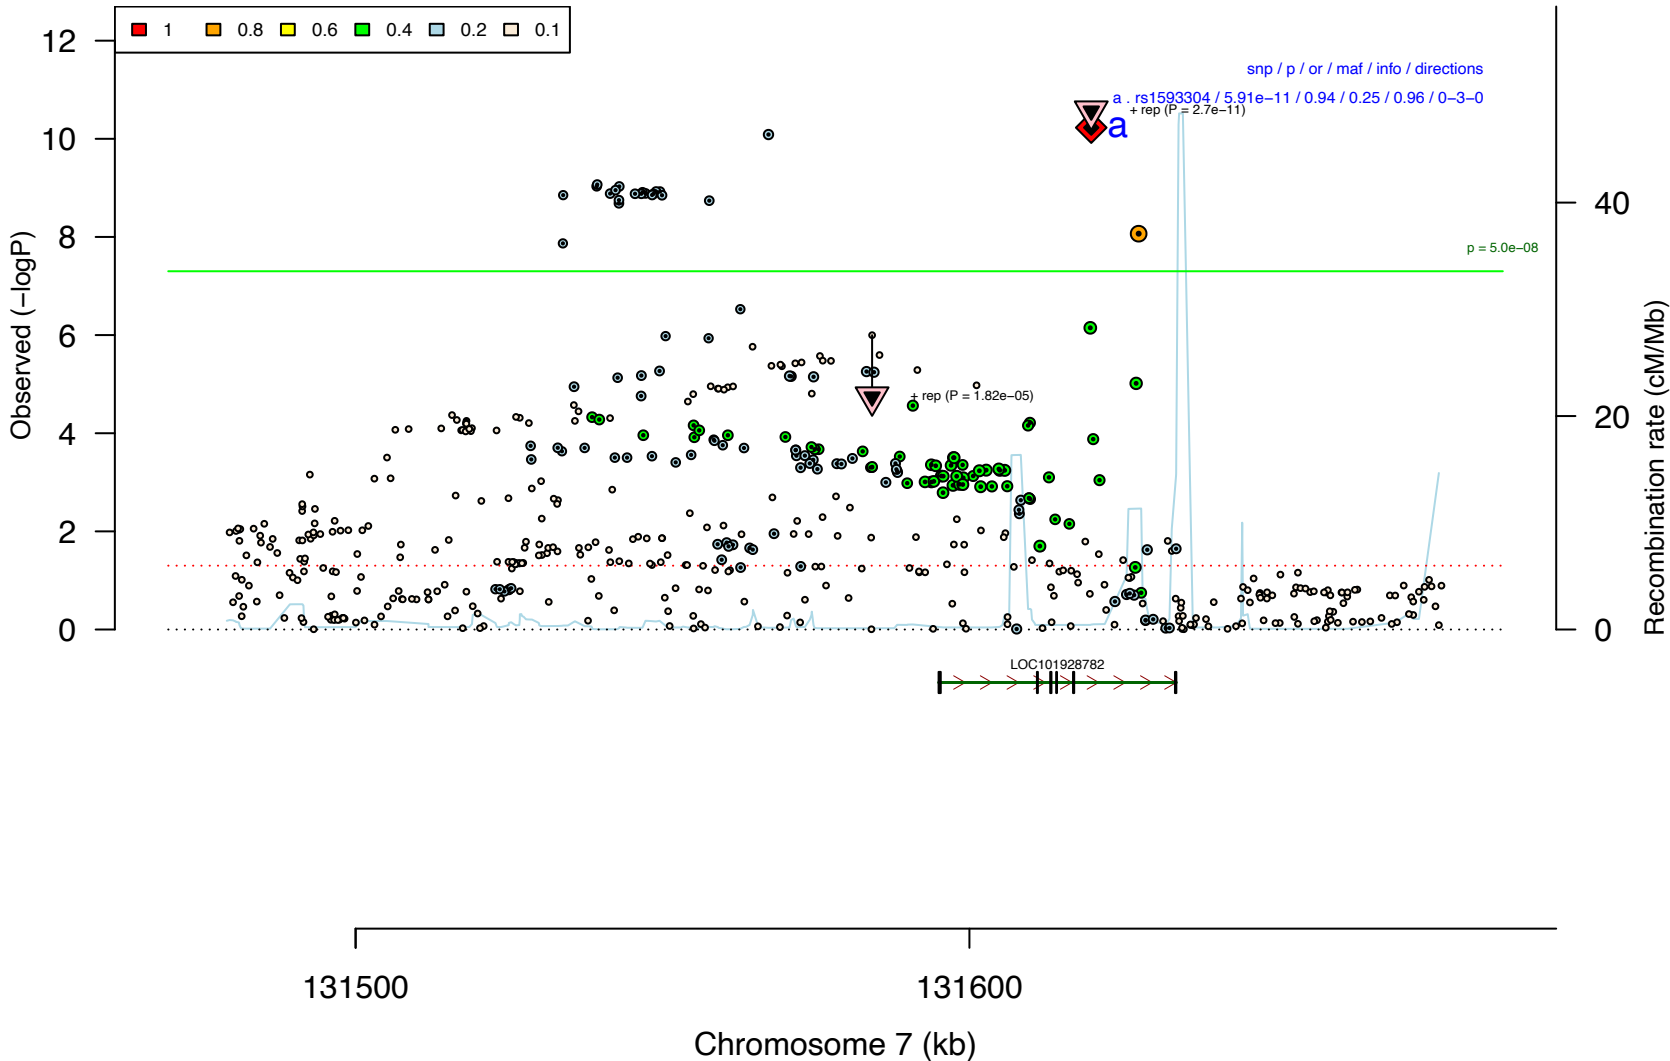

# PGC\_SCZ\_w3\_90\_0418b.87.chr17

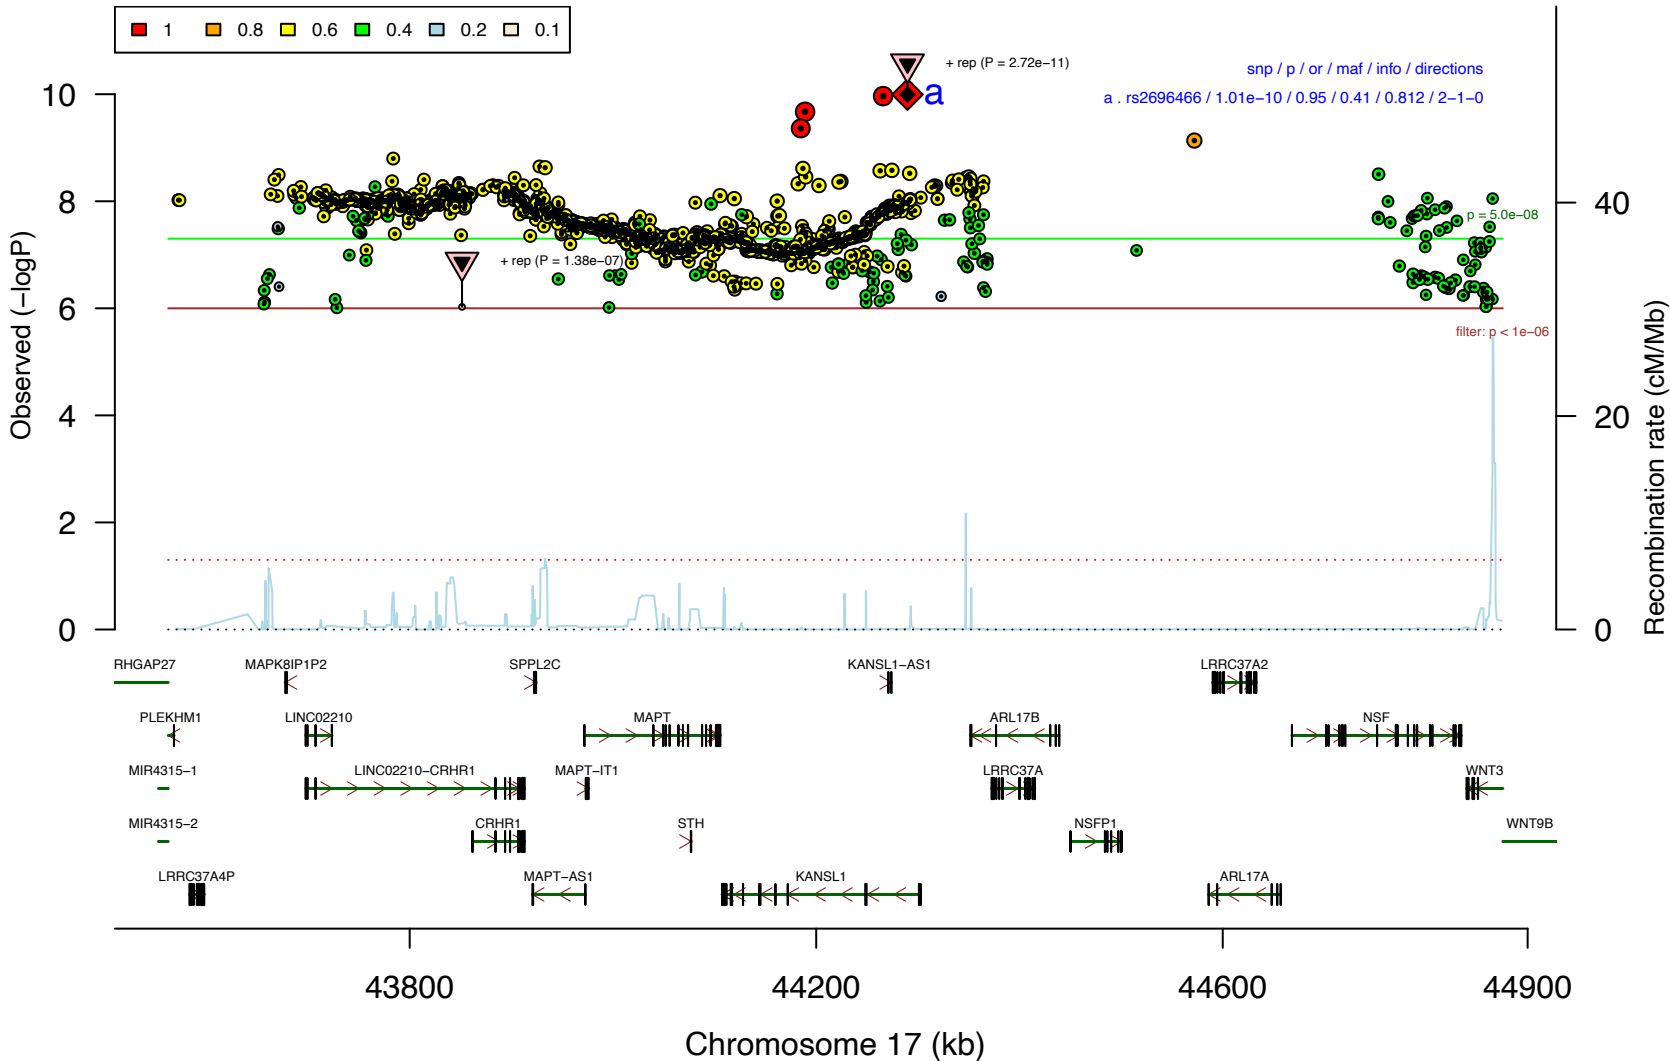

# PGC\_SCZ\_w3\_90\_0418b.88.chr3

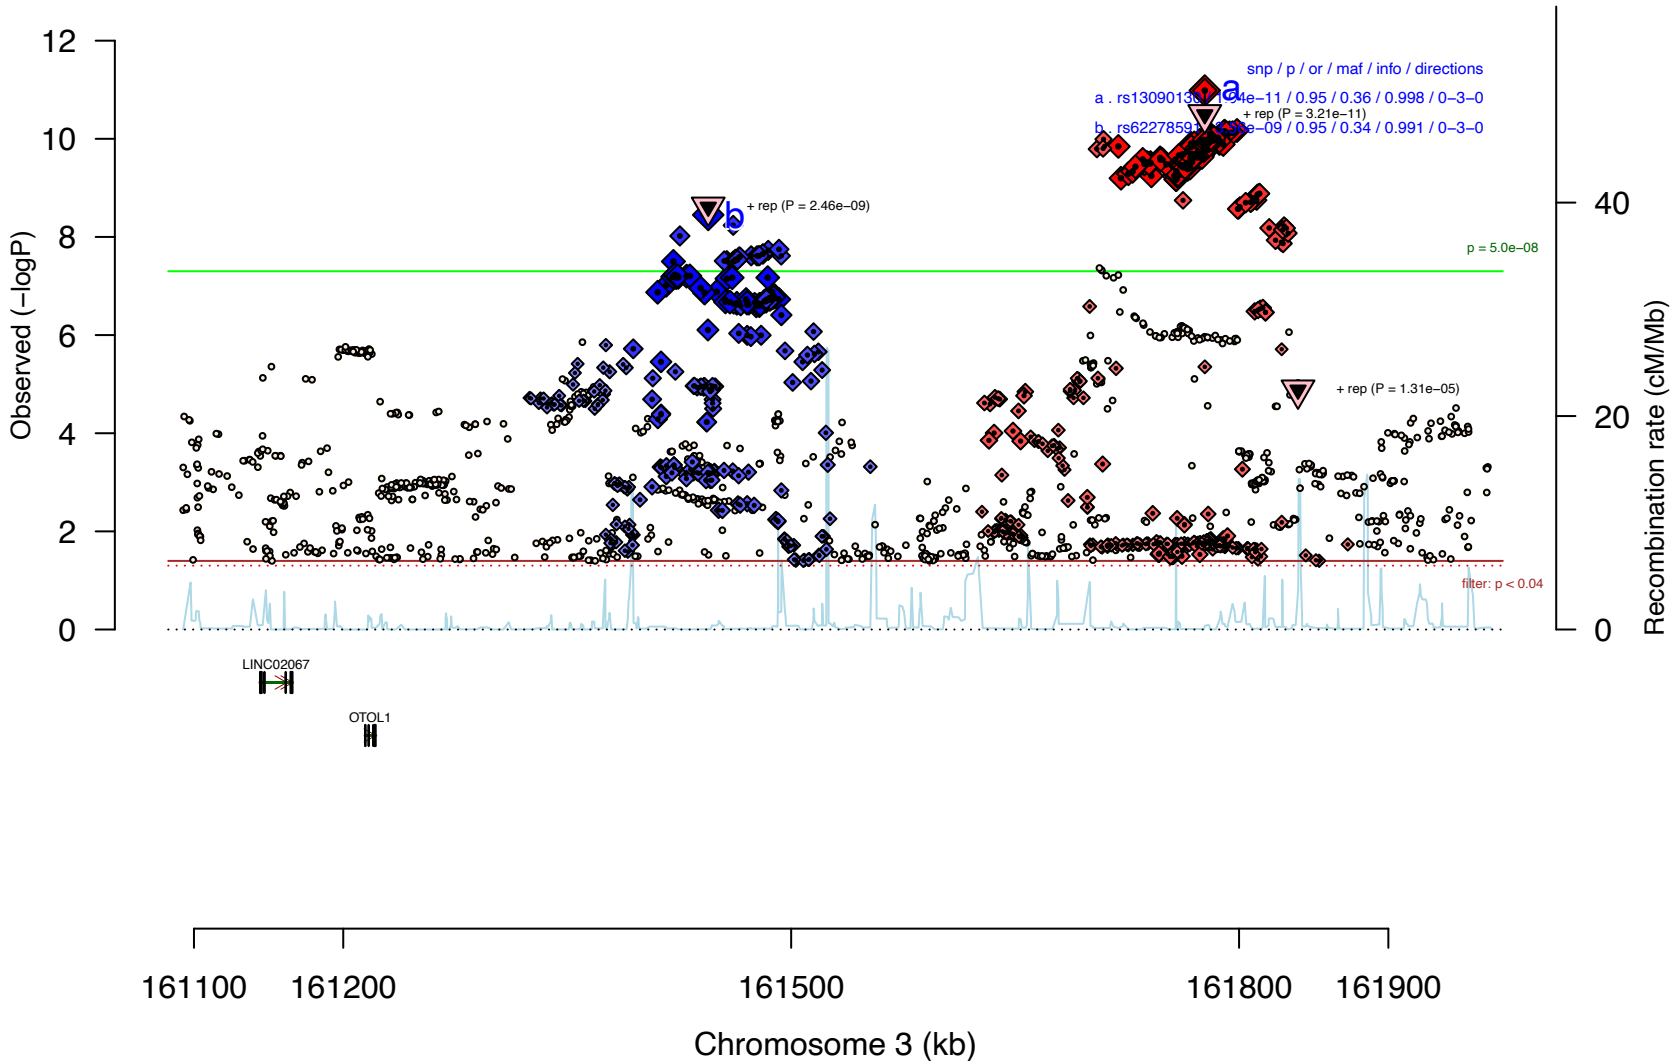

# PGC\_SCZ\_w3\_90\_0418b.89.chr11

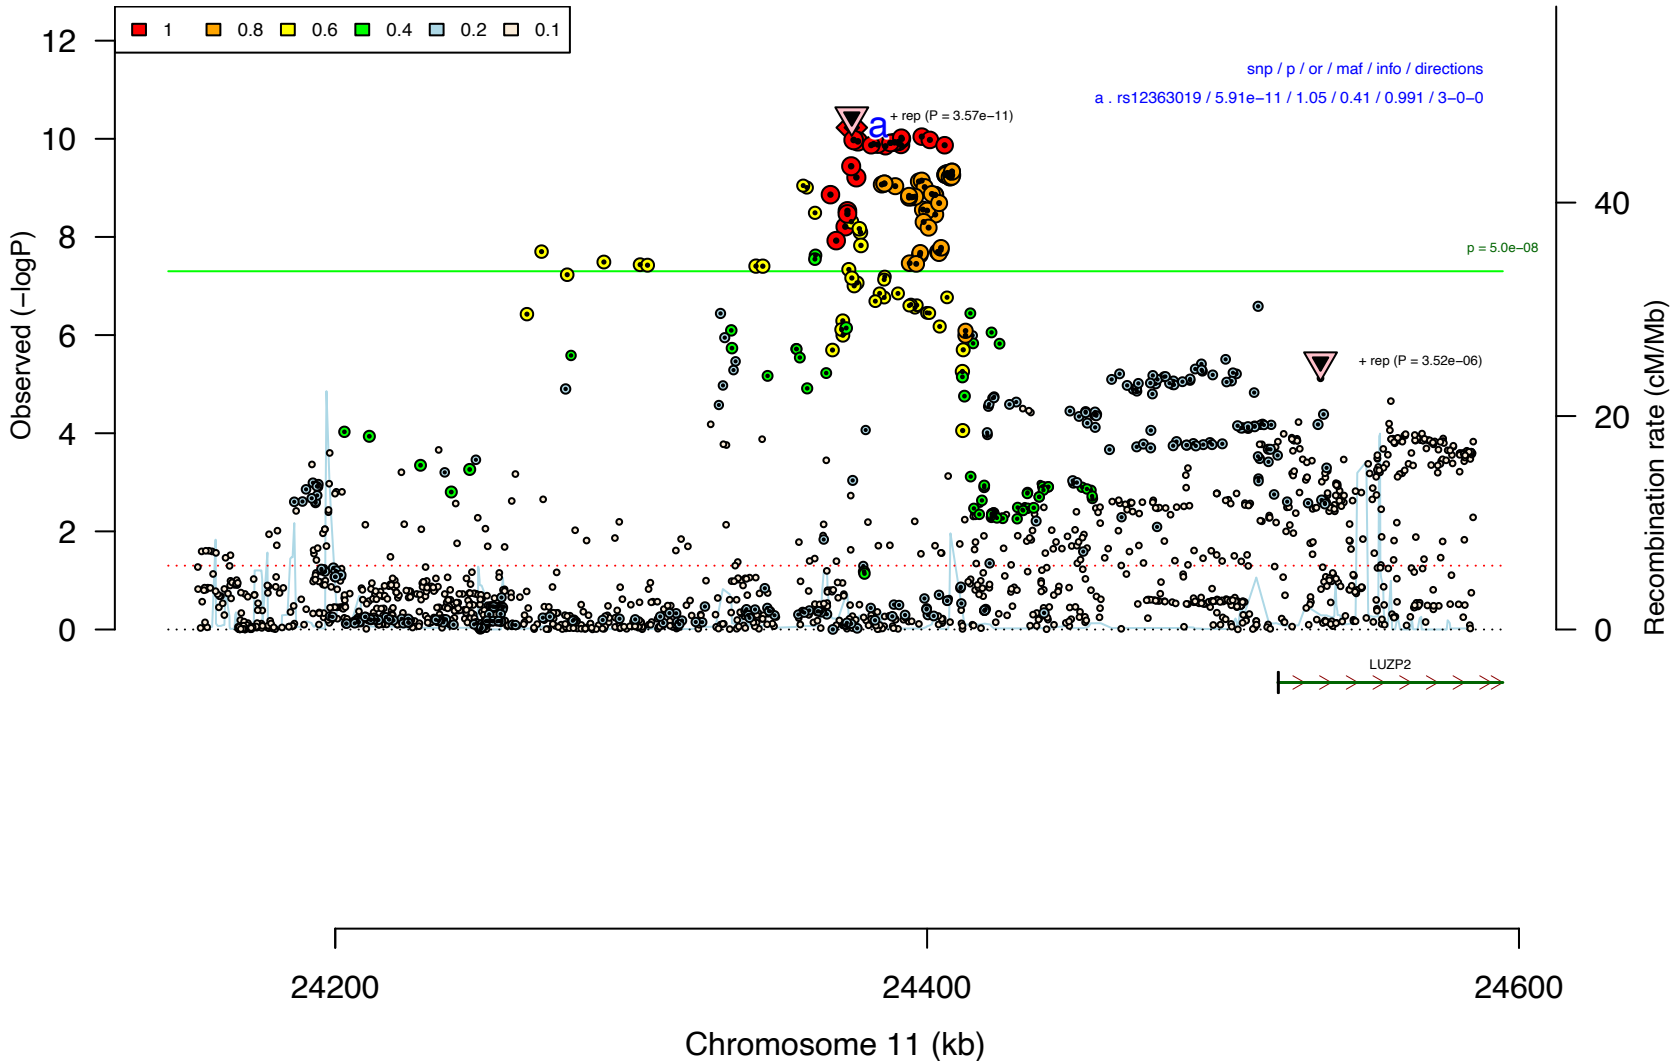

# PGC\_SCZ\_w3\_90\_0418b.90.chr12

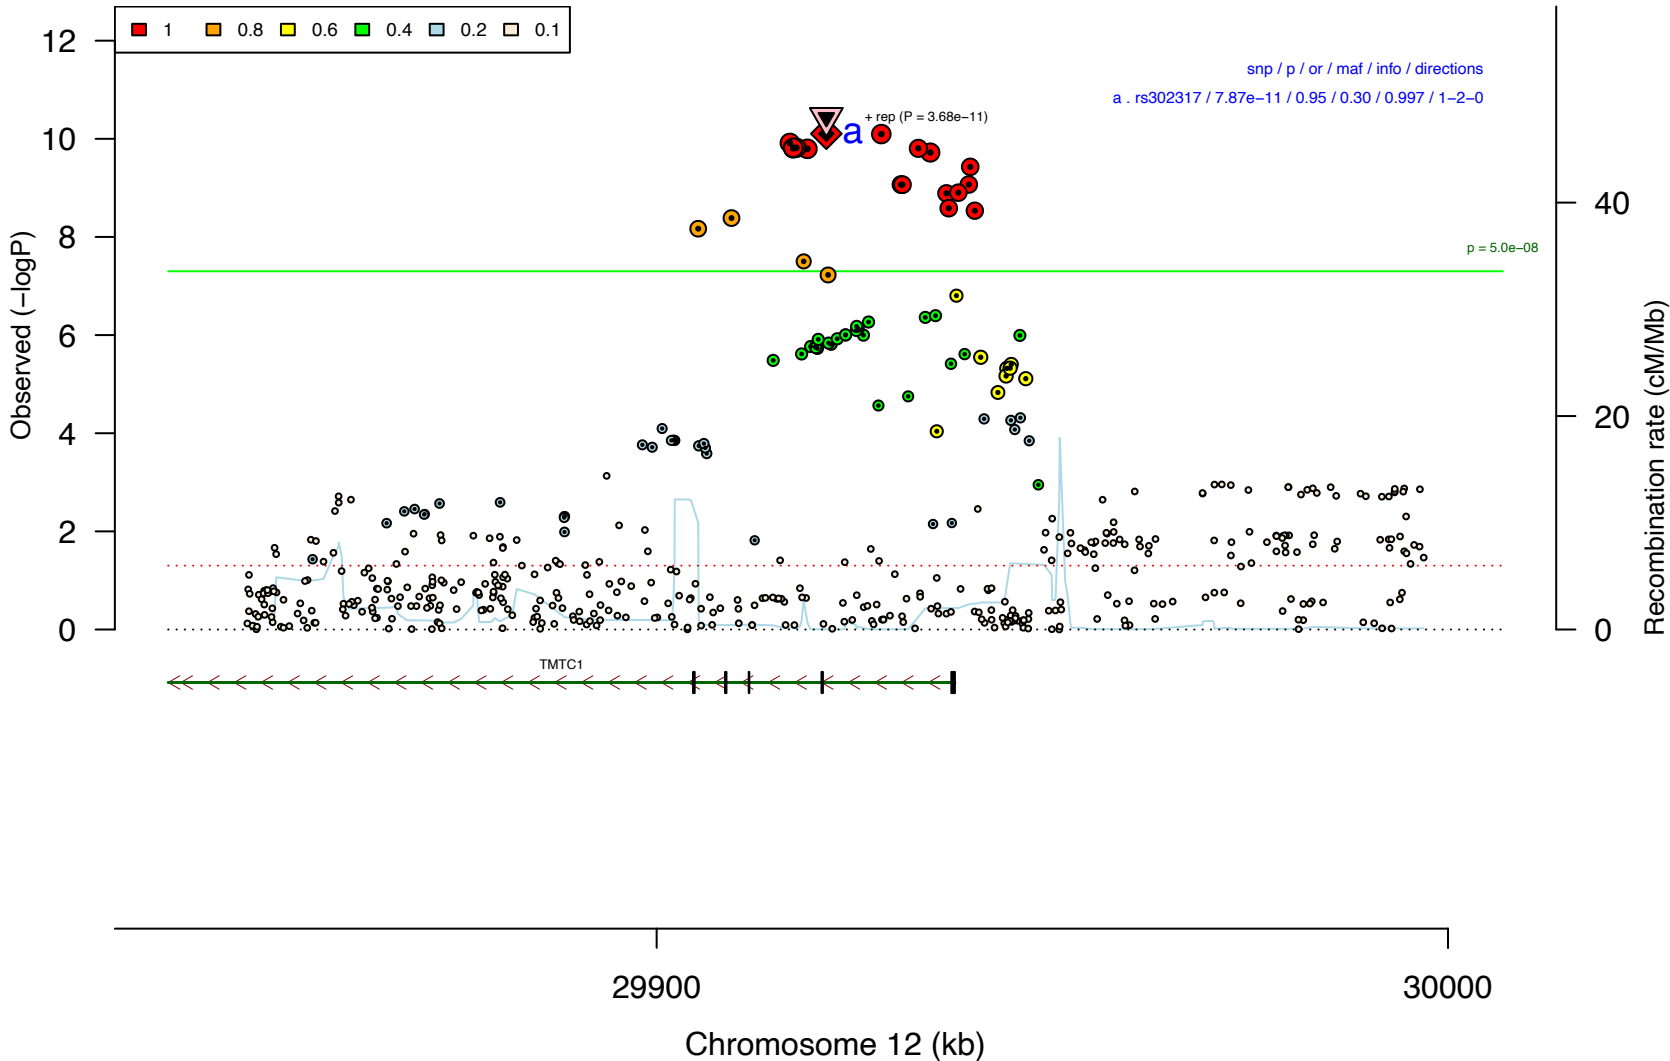

# PGC\_SCZ\_w3\_90\_0418b.91.chr17

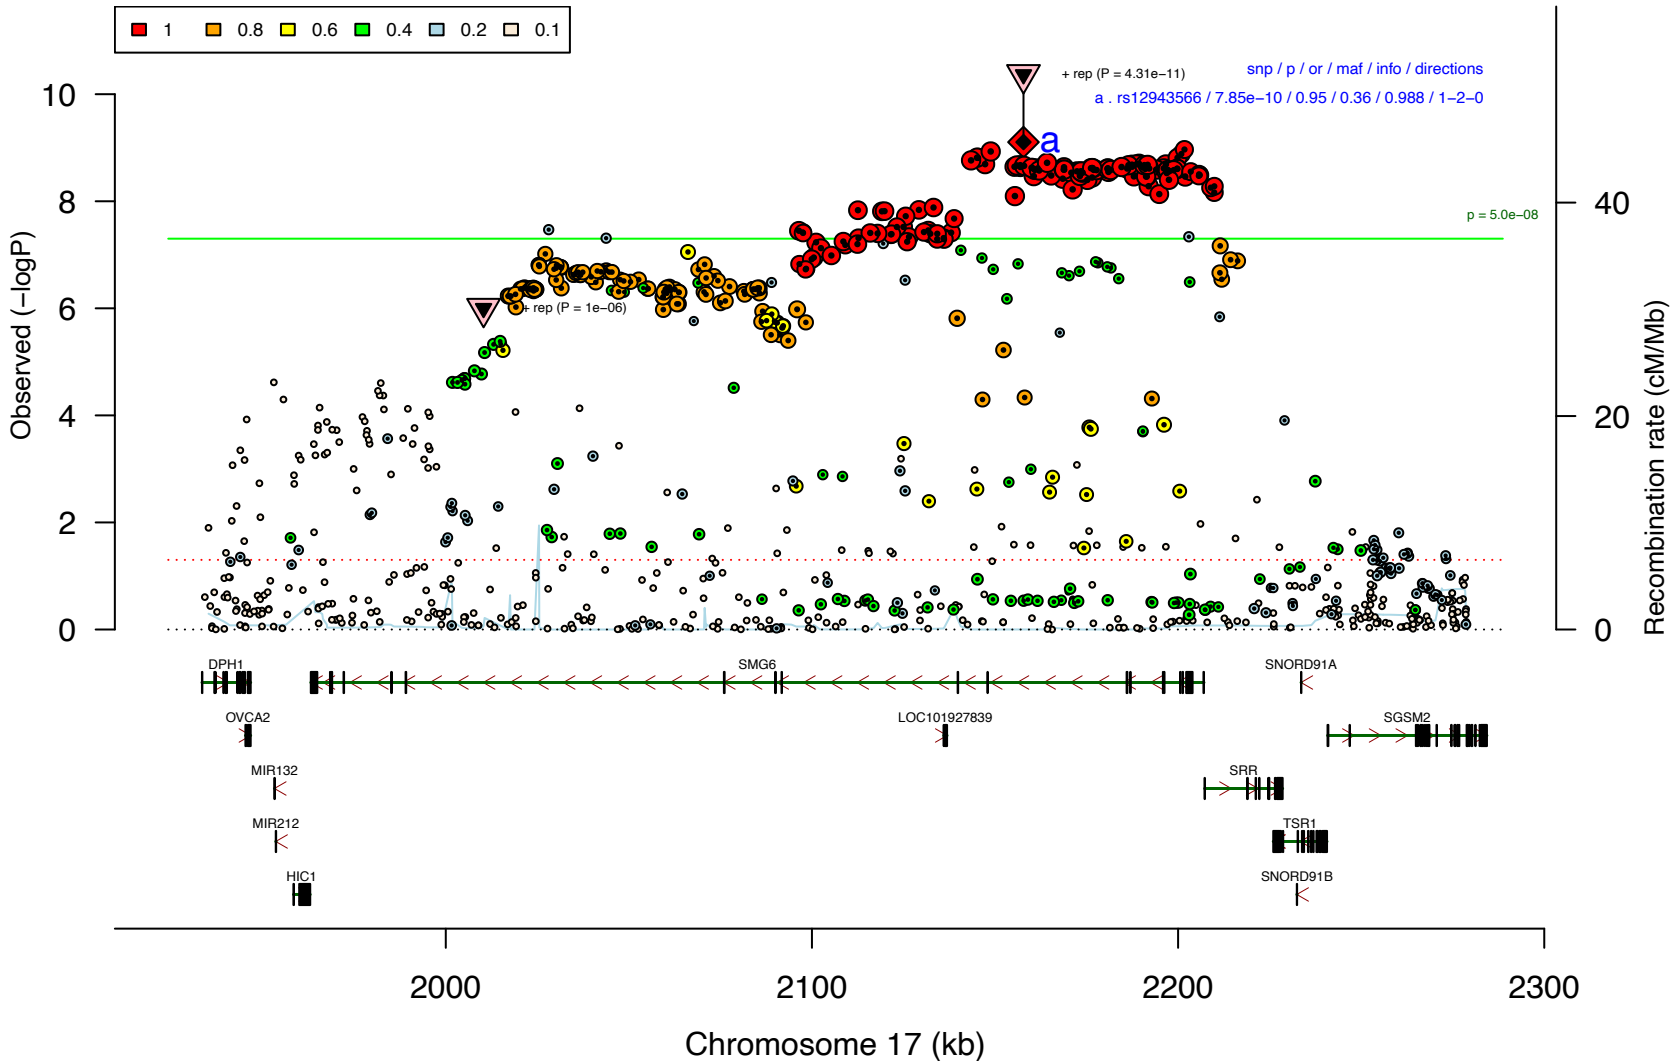

# PGC\_SCZ\_w3\_90\_0418b.92.chr11

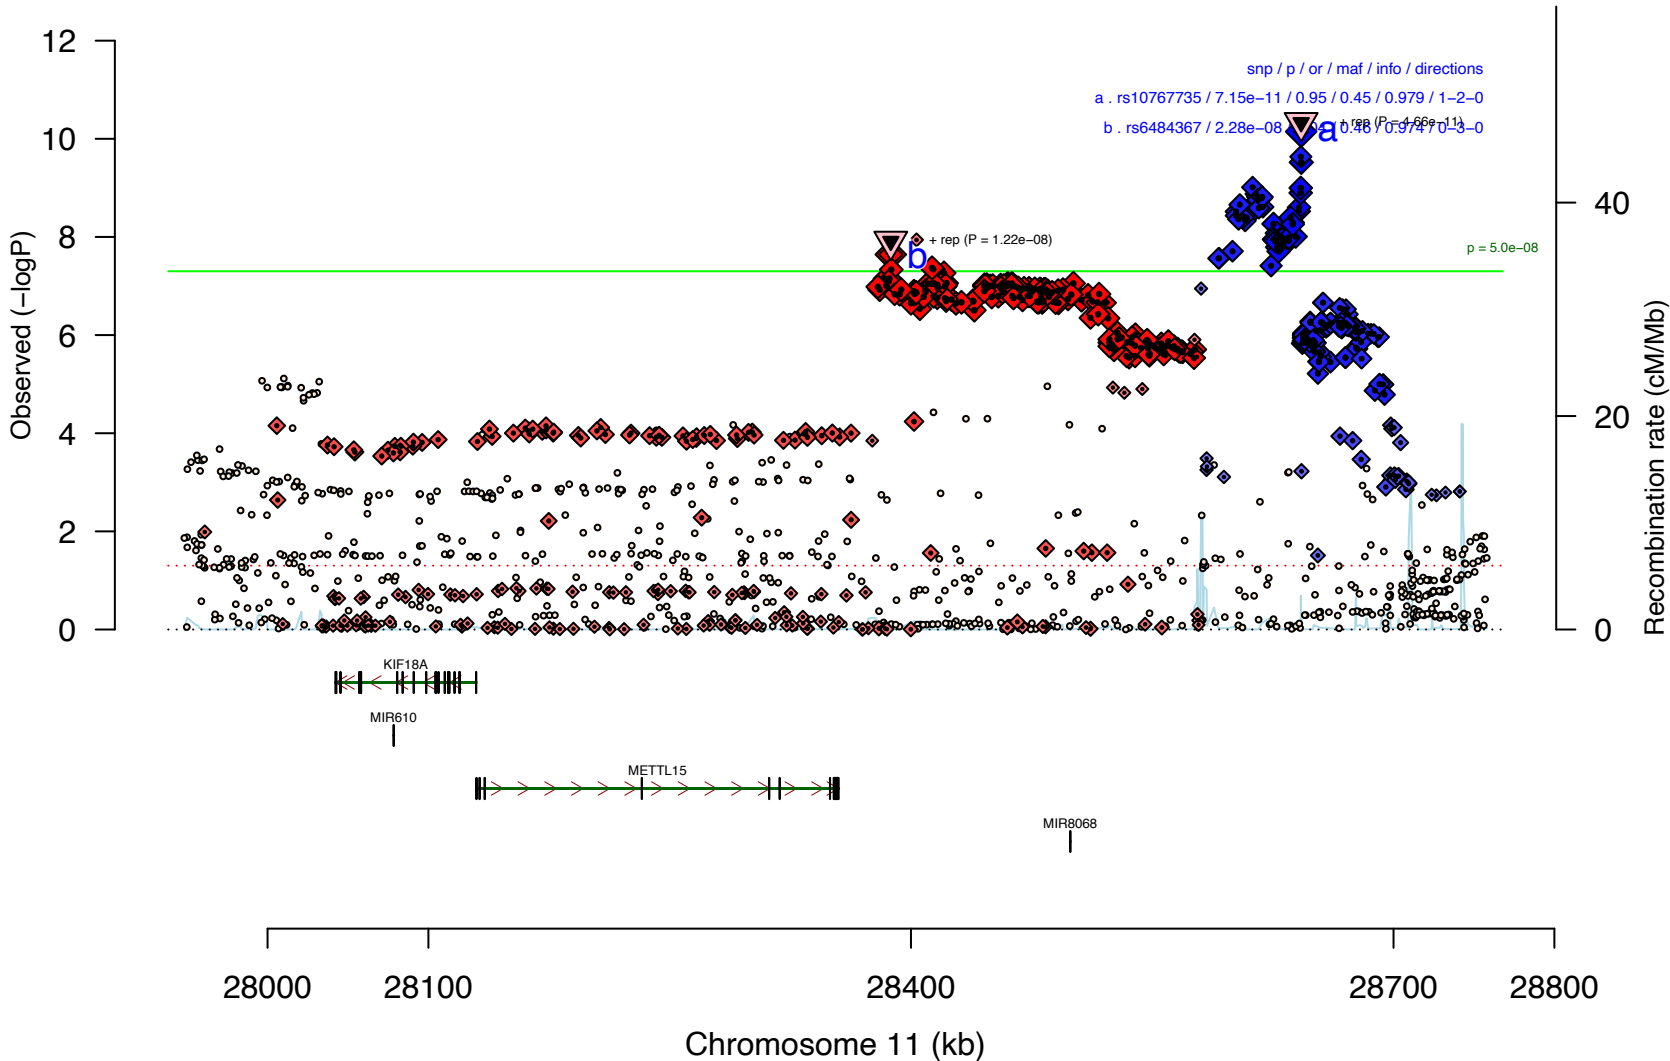



# PGC\_SCZ\_w3\_90\_0418b.93.chr6

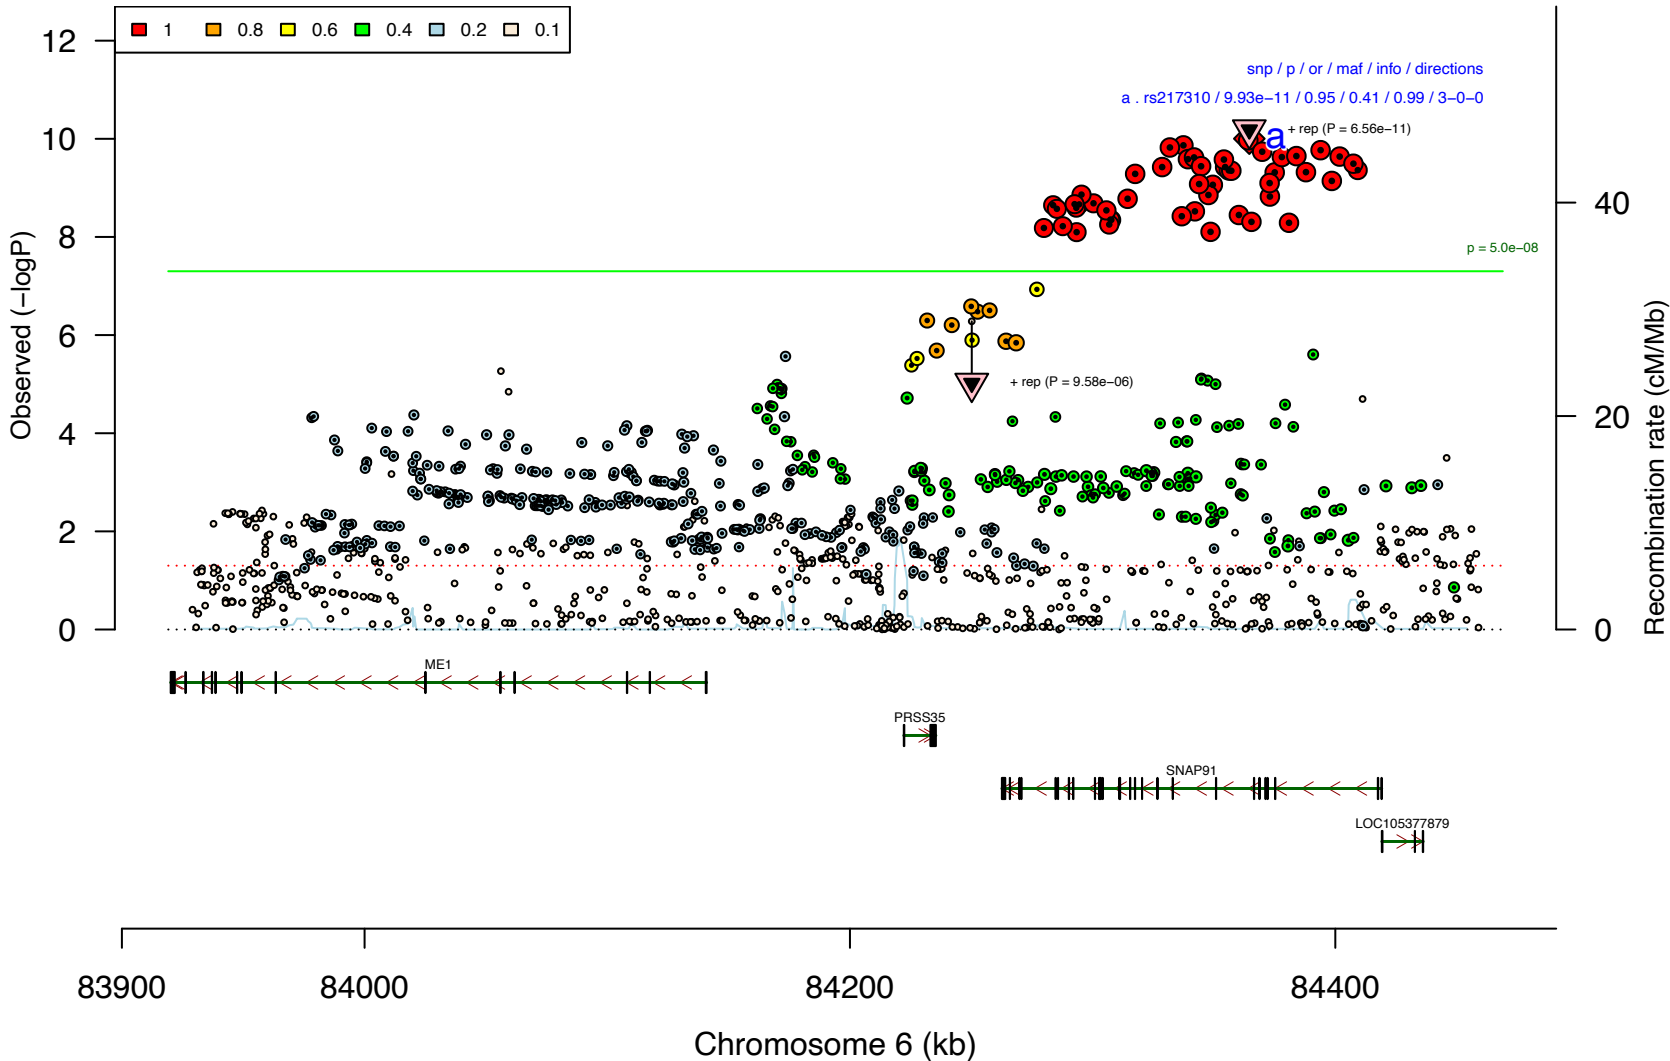

# PGC\_SCZ\_w3\_90\_0418b.94.chr3

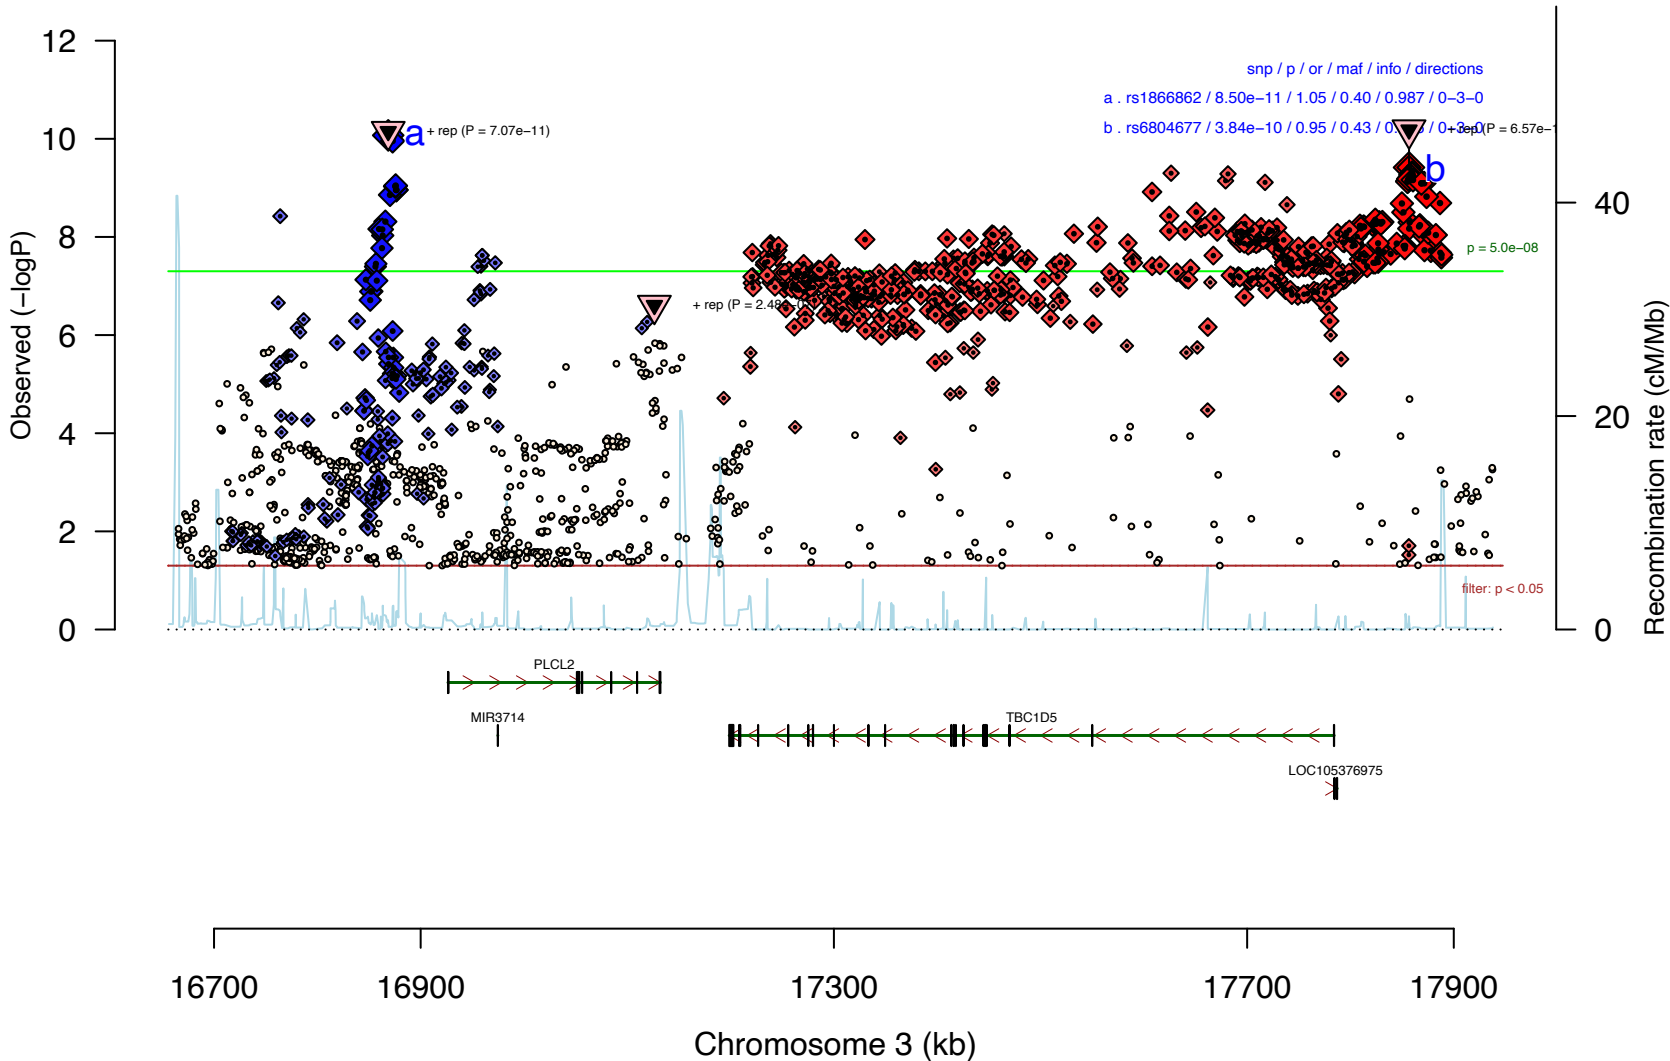

# PGC\_SCZ\_w3\_90\_0418b.95.chr15

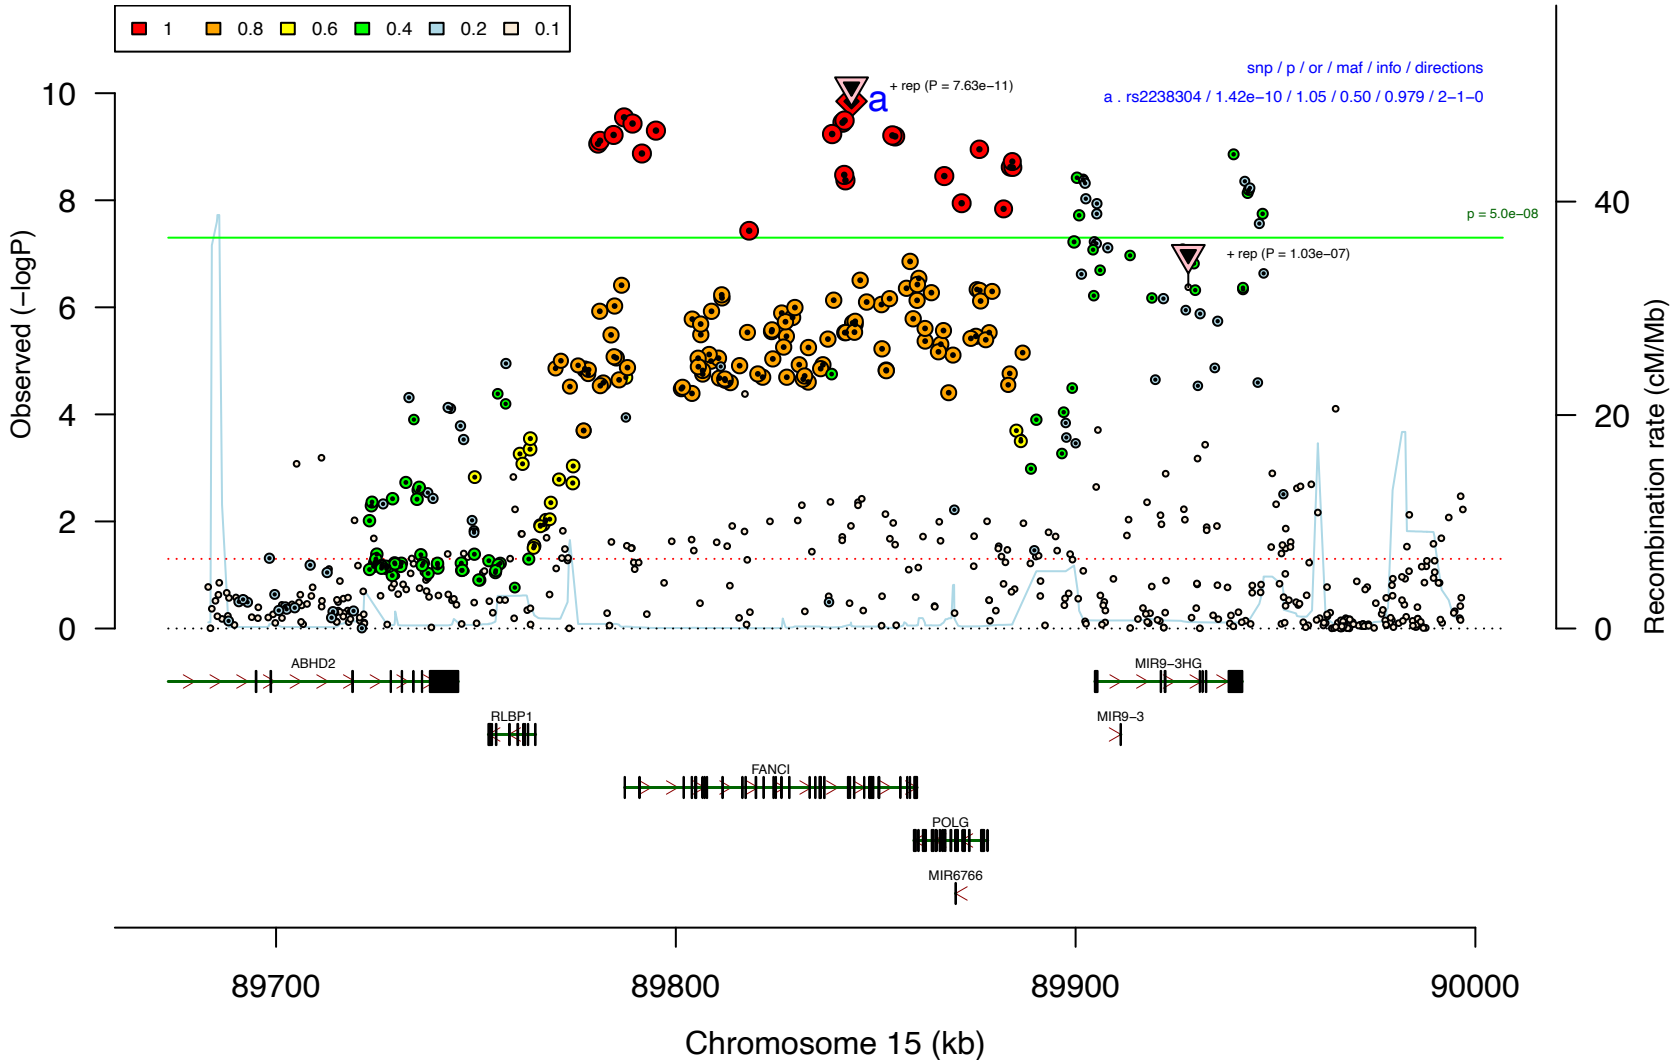

# PGC\_SCZ\_w3\_90\_0418b.96.chr5

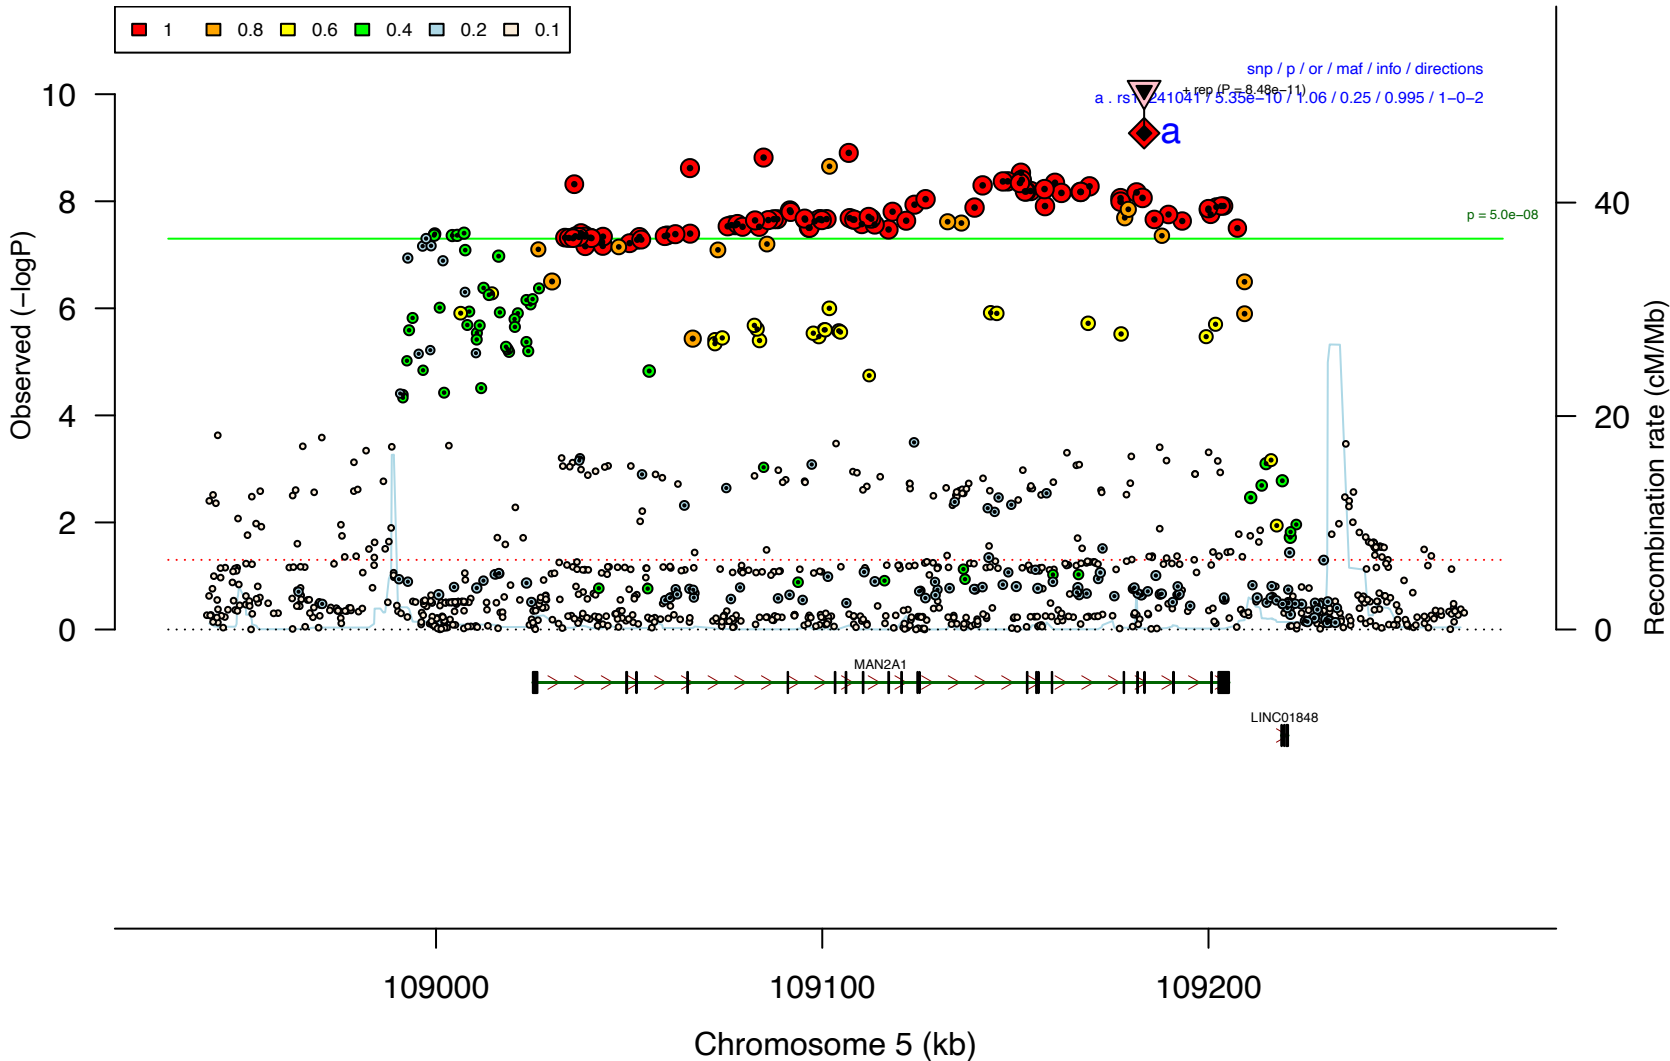

# PGC\_SCZ\_w3\_90\_0418b.97.chr13

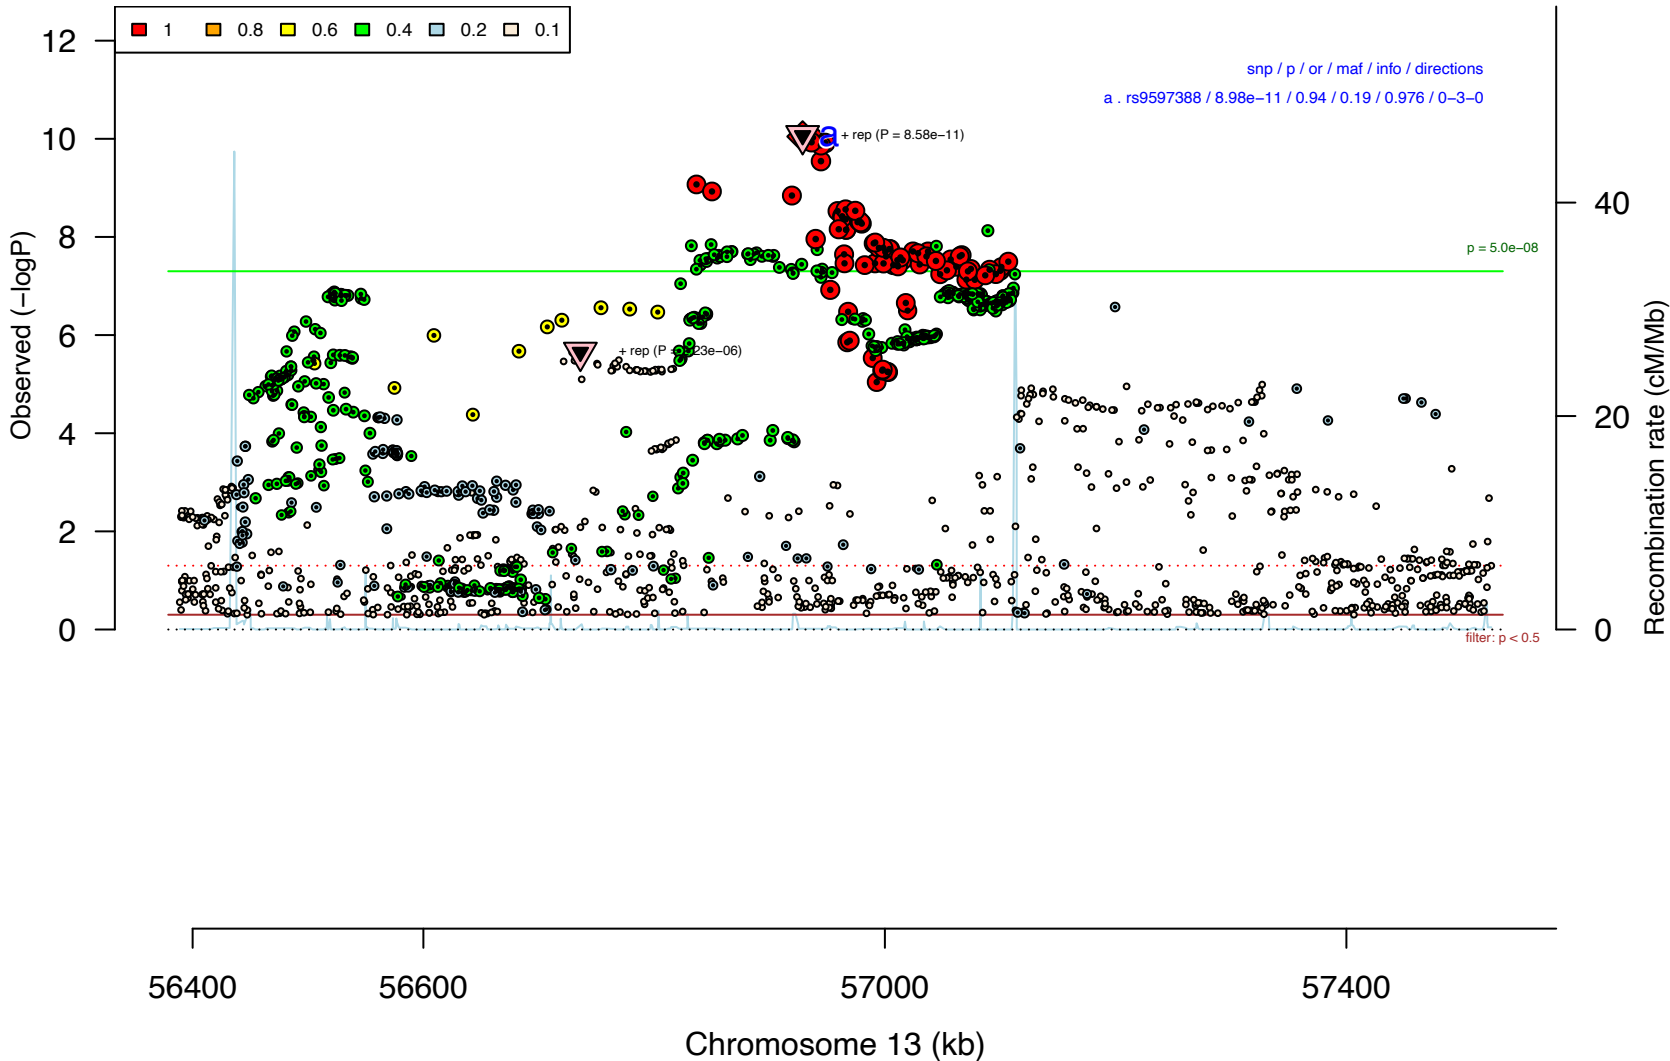

# PGC\_SCZ\_w3\_90\_0418b.98.chr5

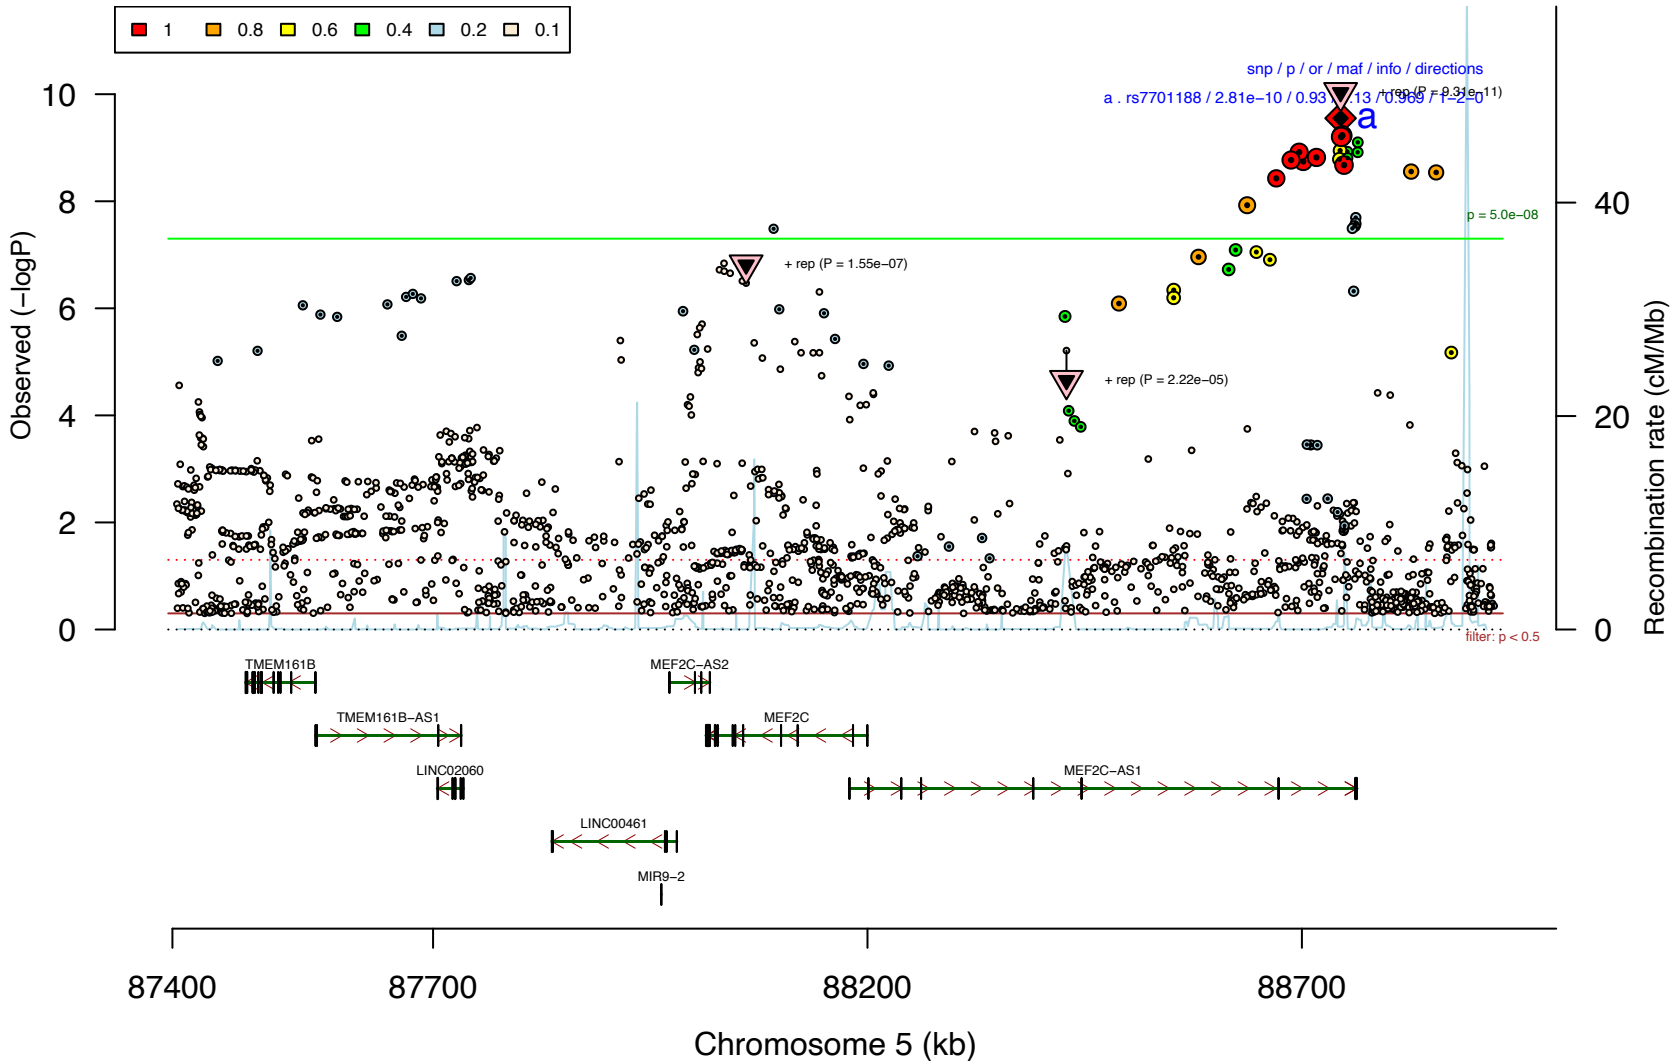

# PGC\_SCZ\_w3\_90\_0418b.99.chr17

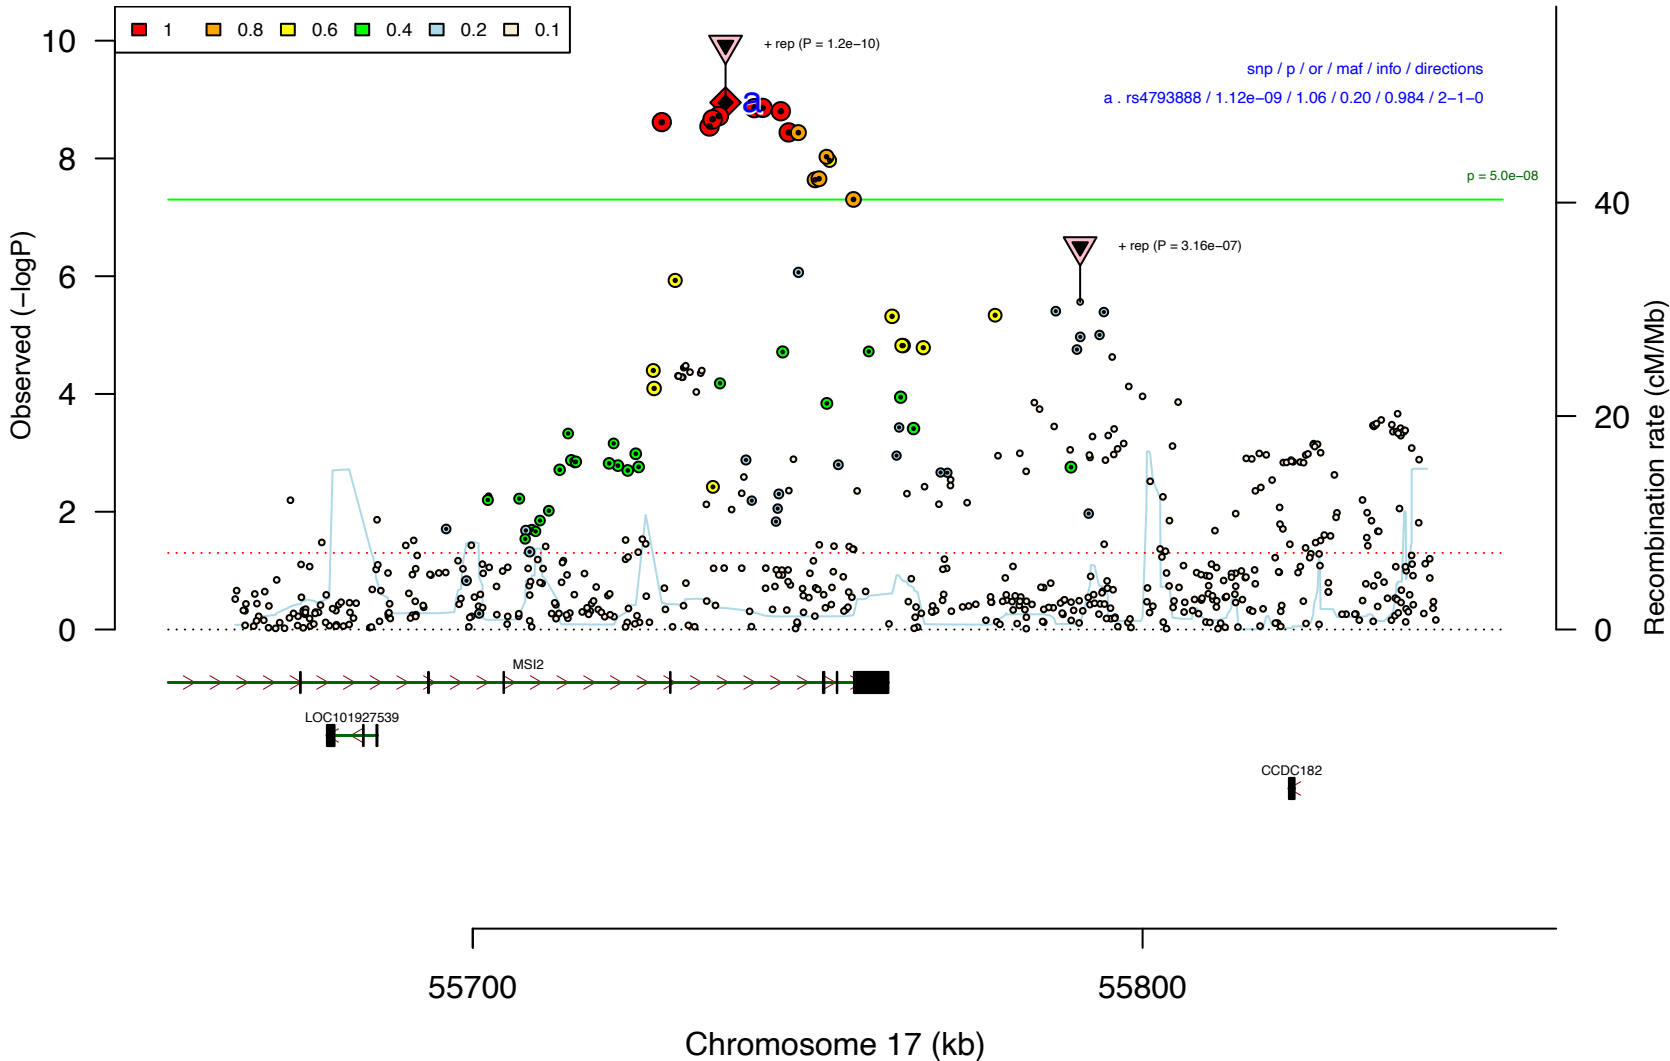

# PGC\_SCZ\_w3\_90\_0418b.100.chr2

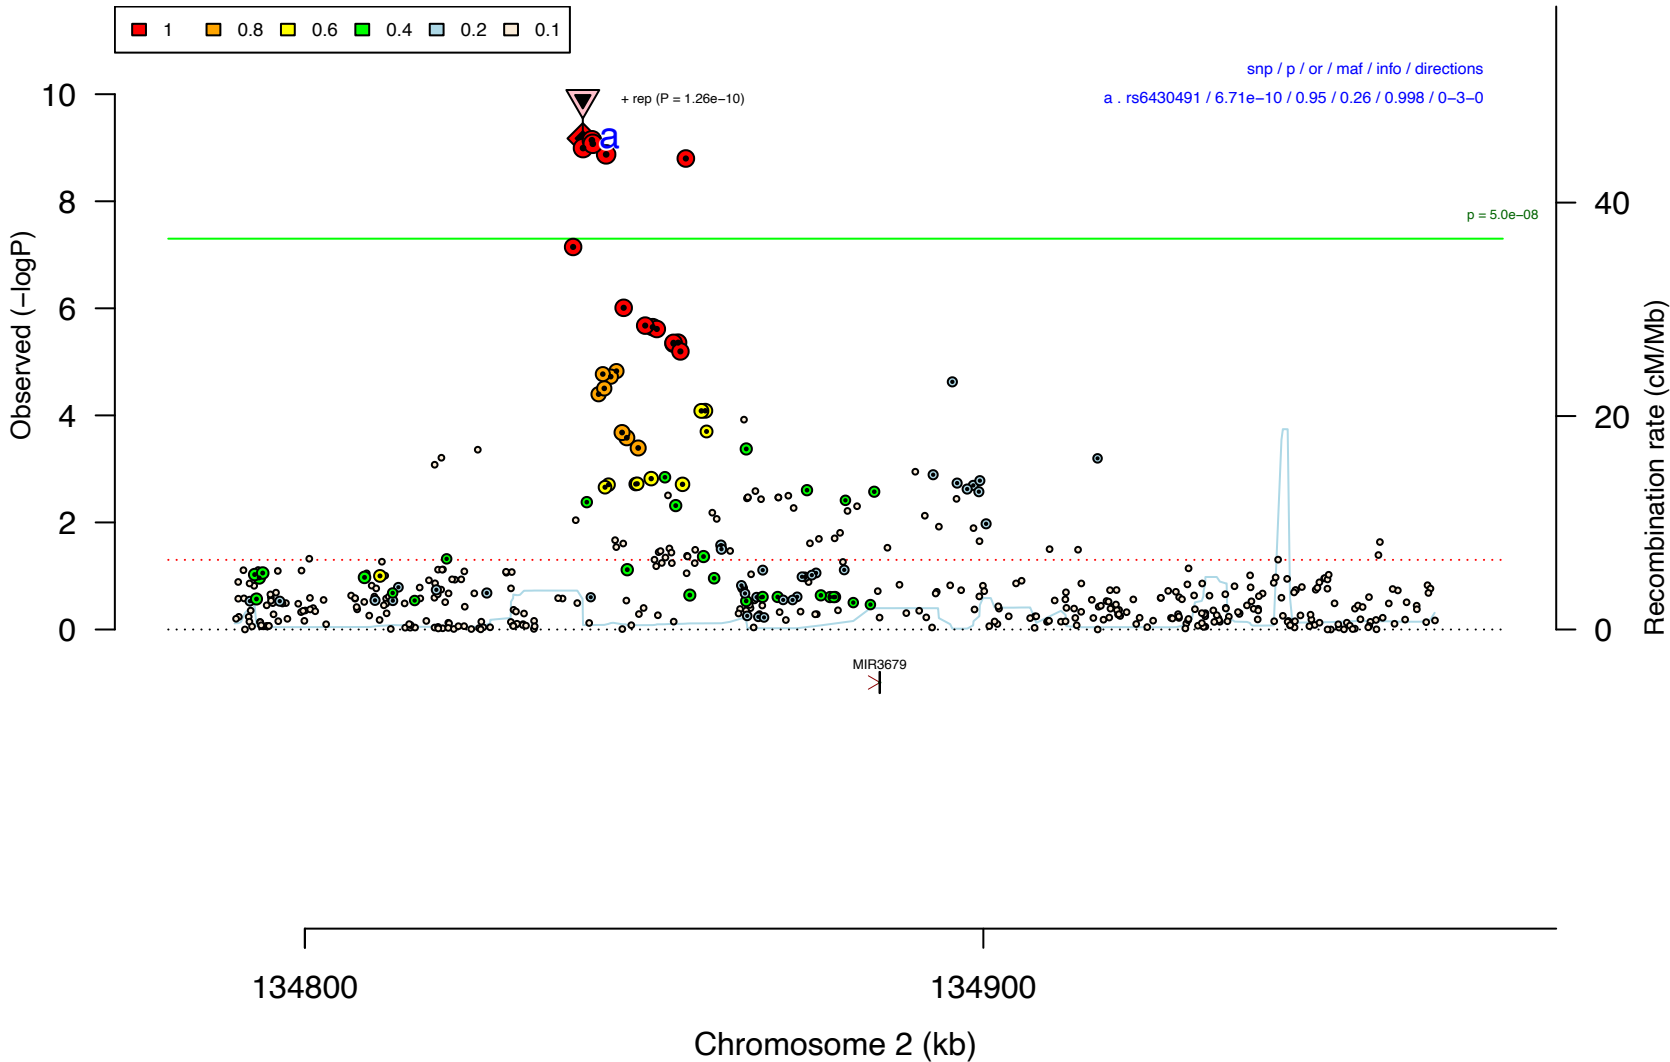



# PGC\_SCZ\_w3\_90\_0418b.101.chr4

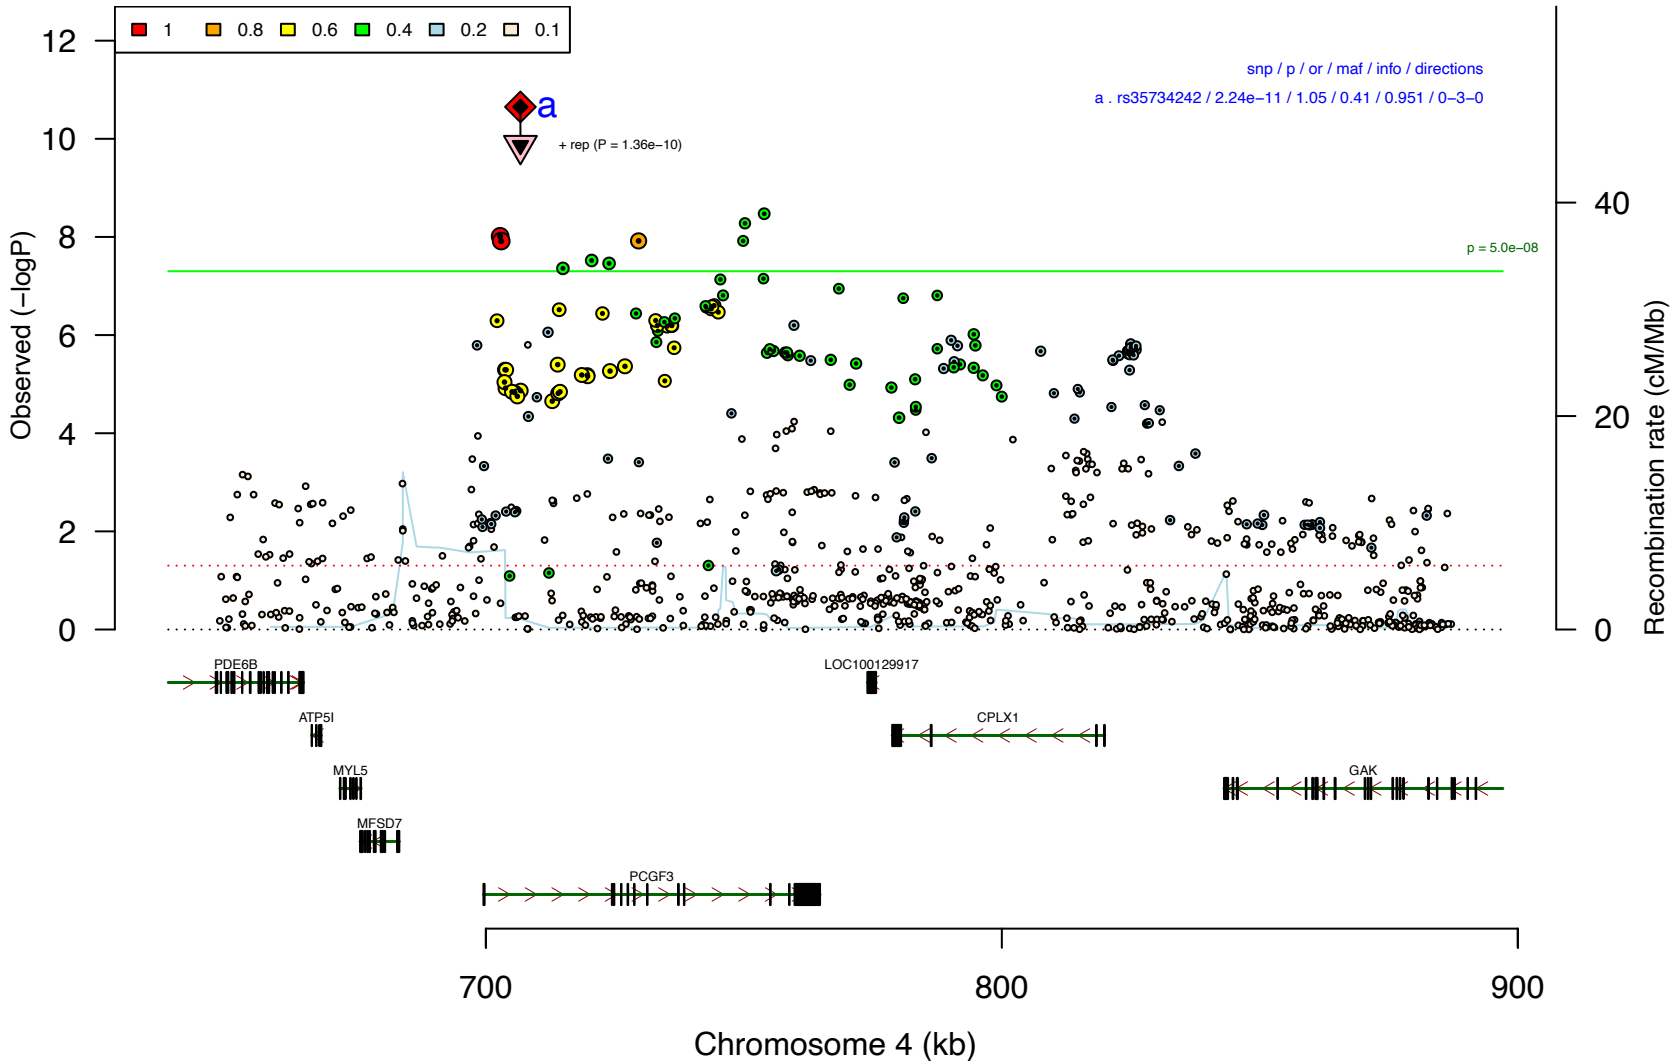

# PGC\_SCZ\_w3\_90\_0418b.102.chr20

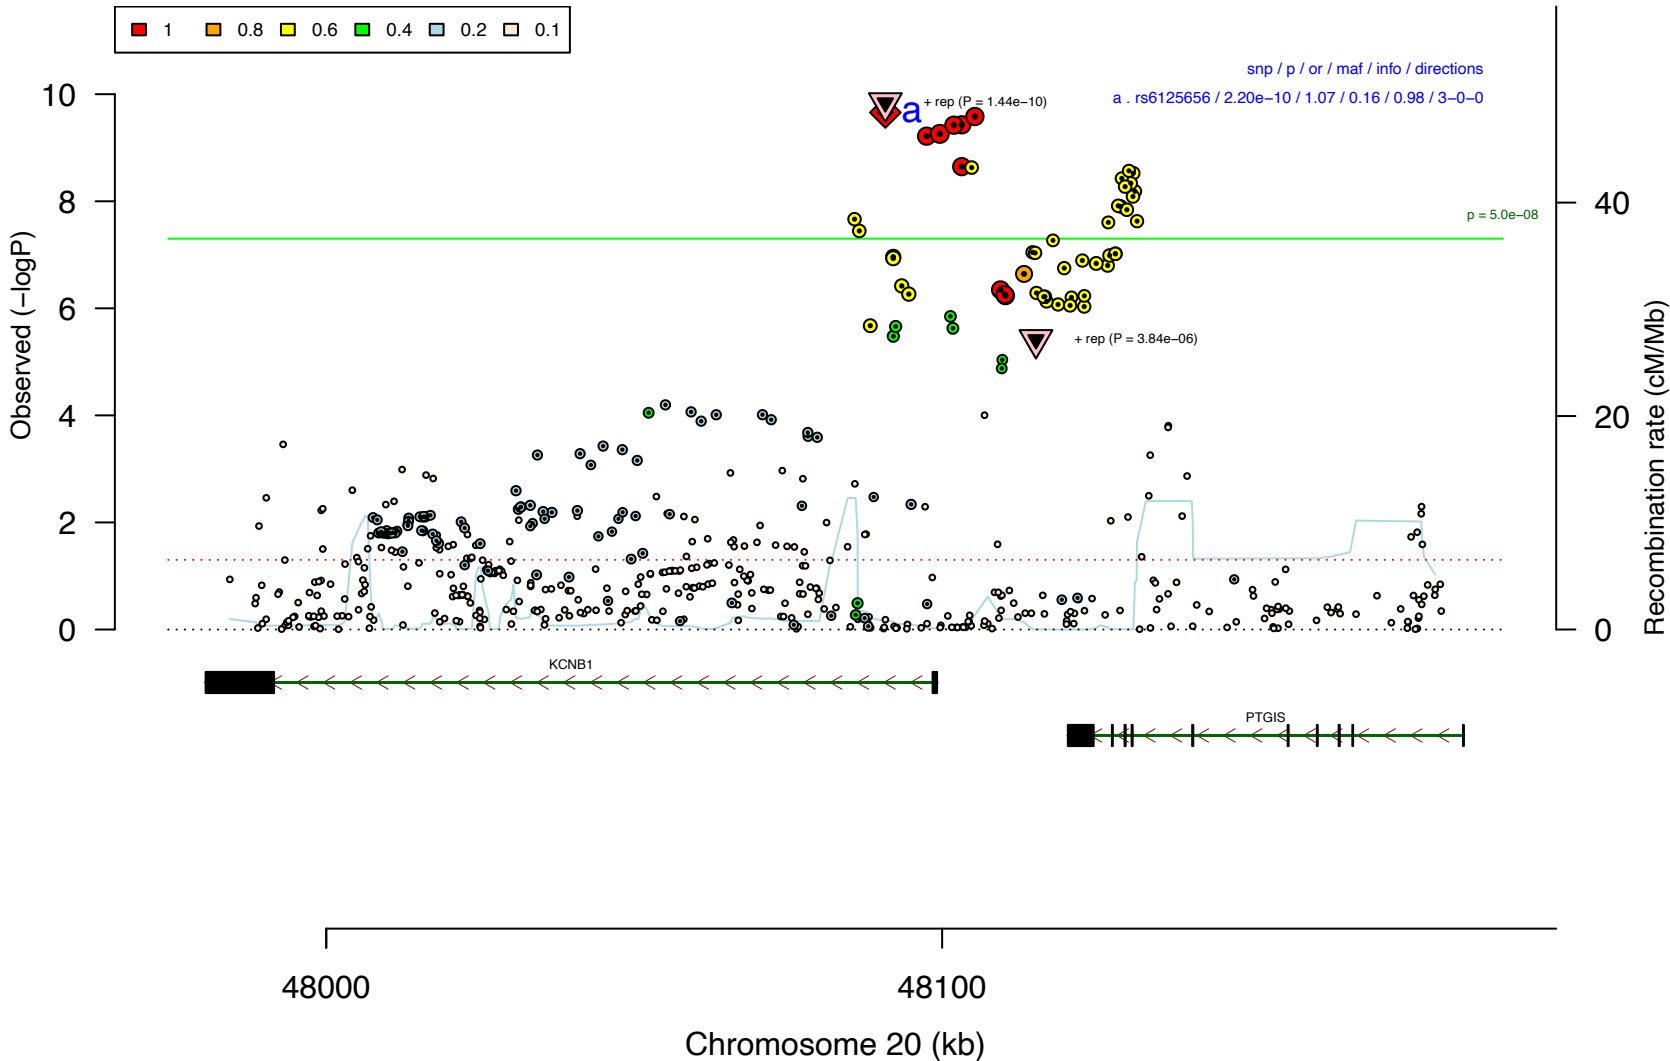

# PGC\_SCZ\_w3\_90\_0418b.103.chr1

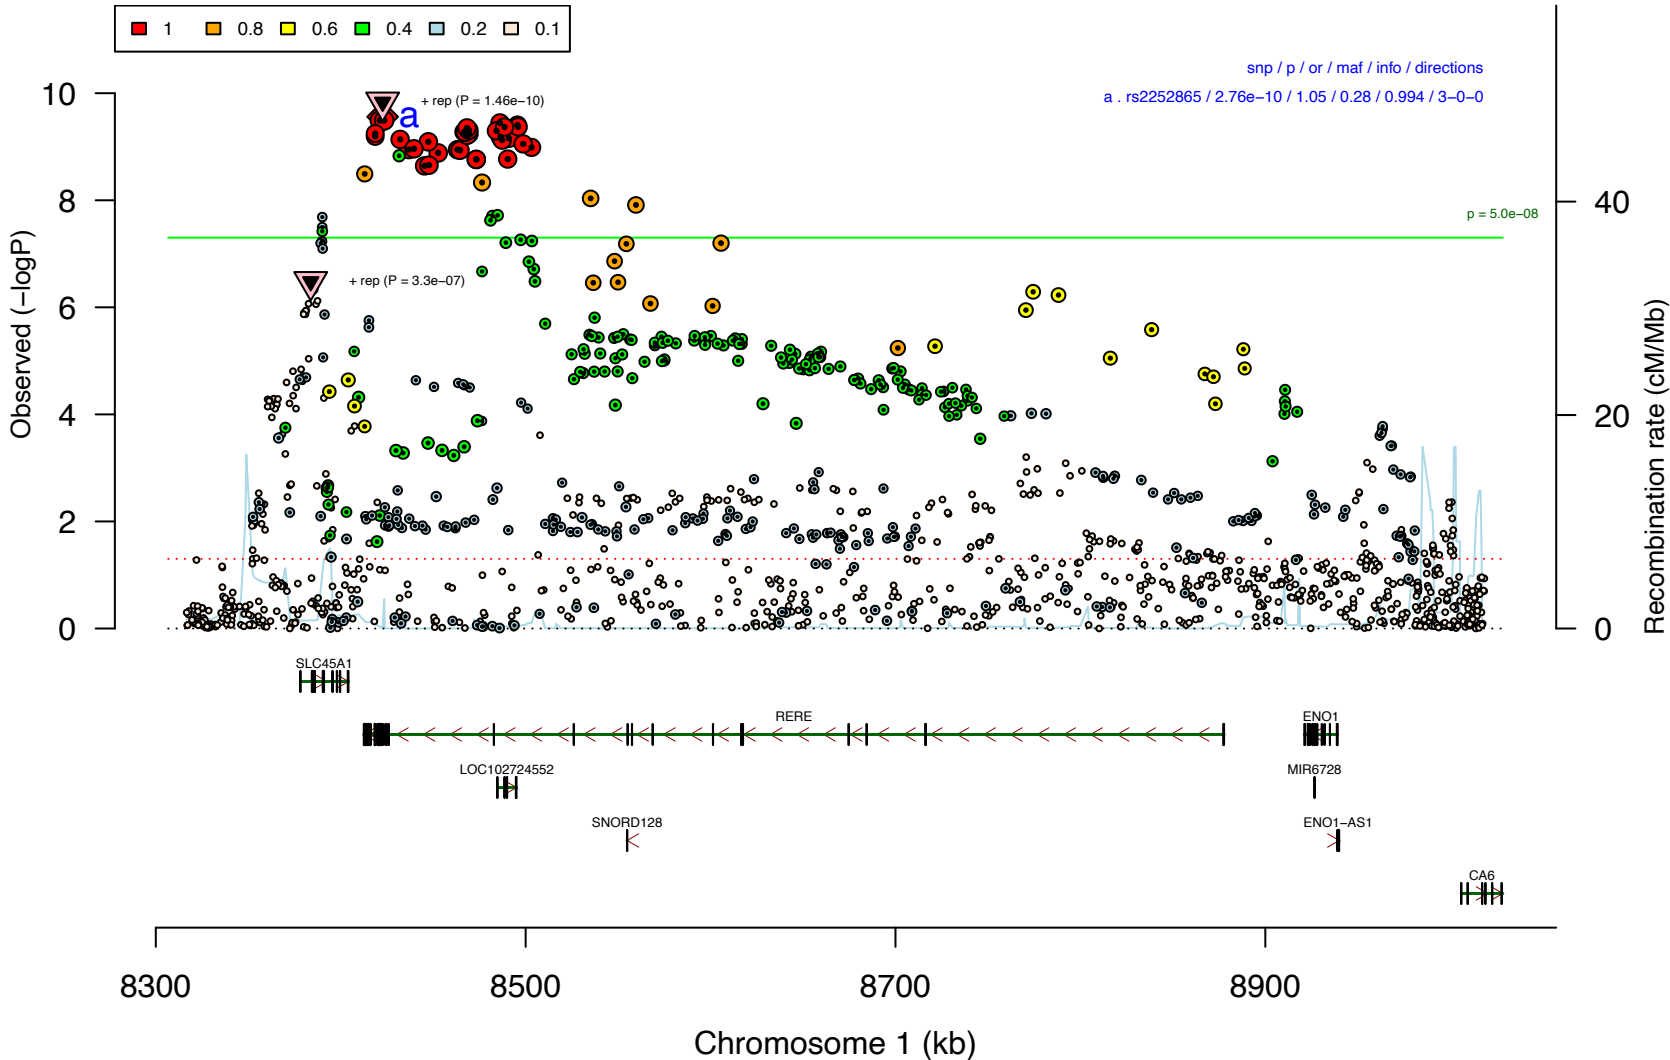

# PGC\_SCZ\_w3\_90\_0418b.104.chr14

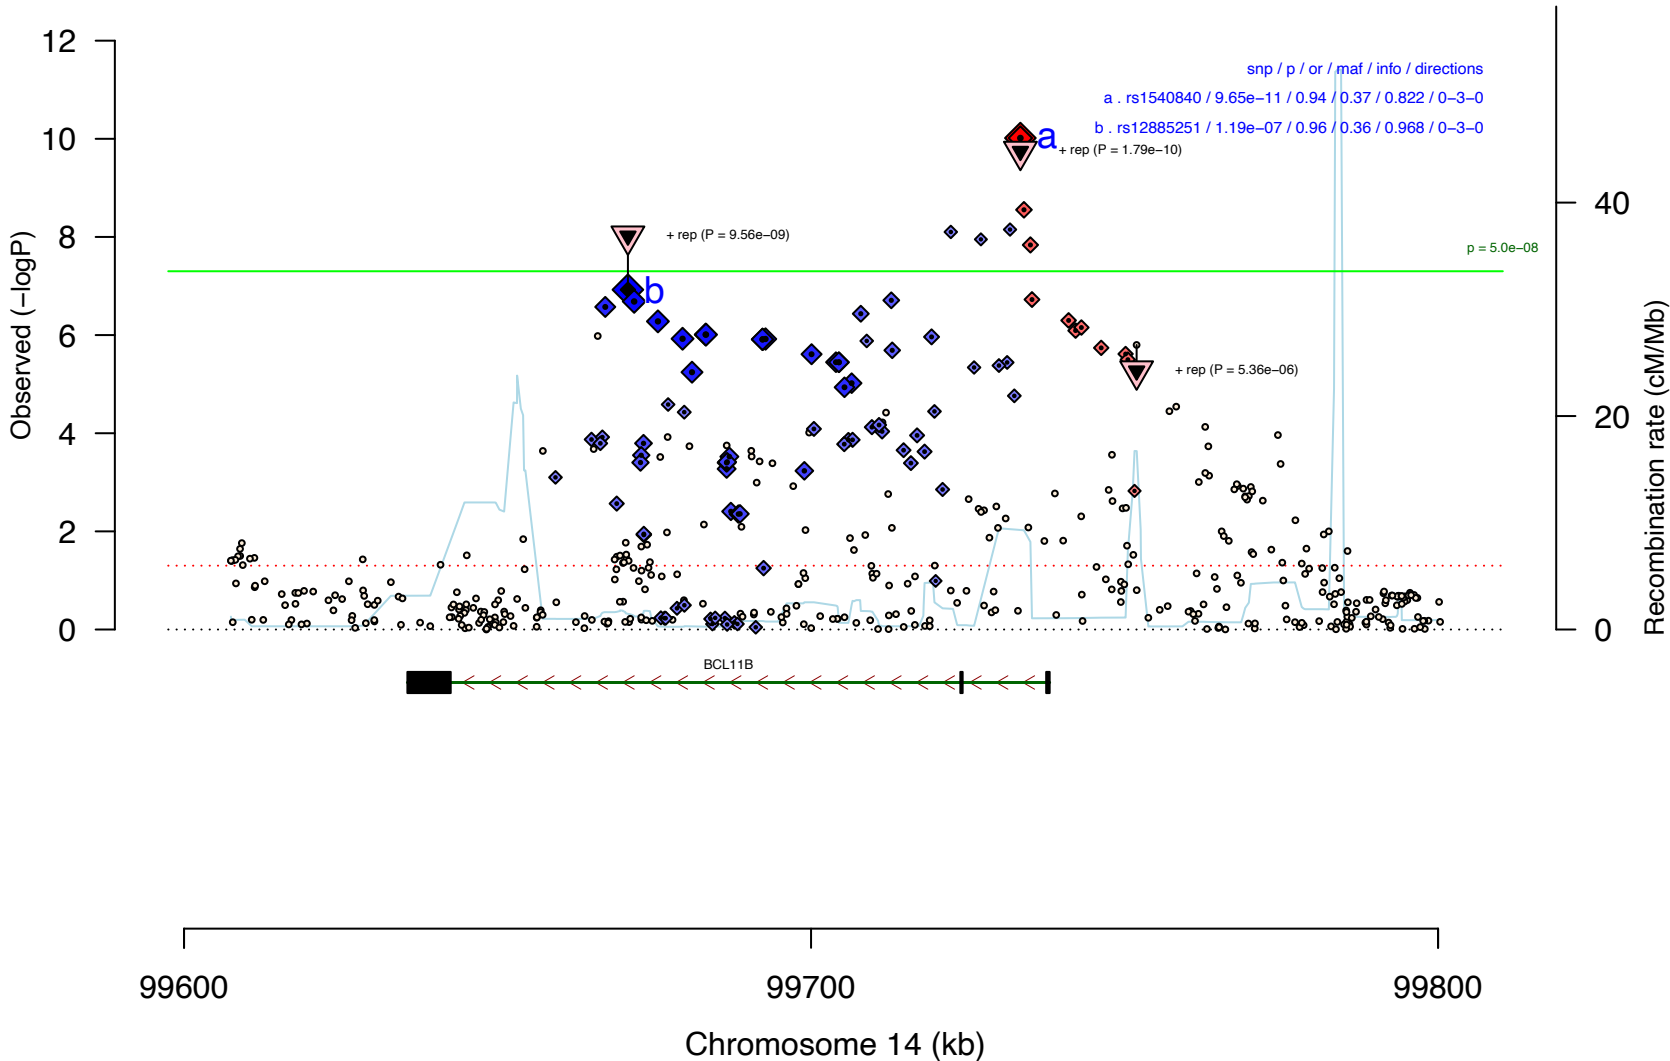

# PGC\_SCZ\_w3\_90\_0418b.105.chr2

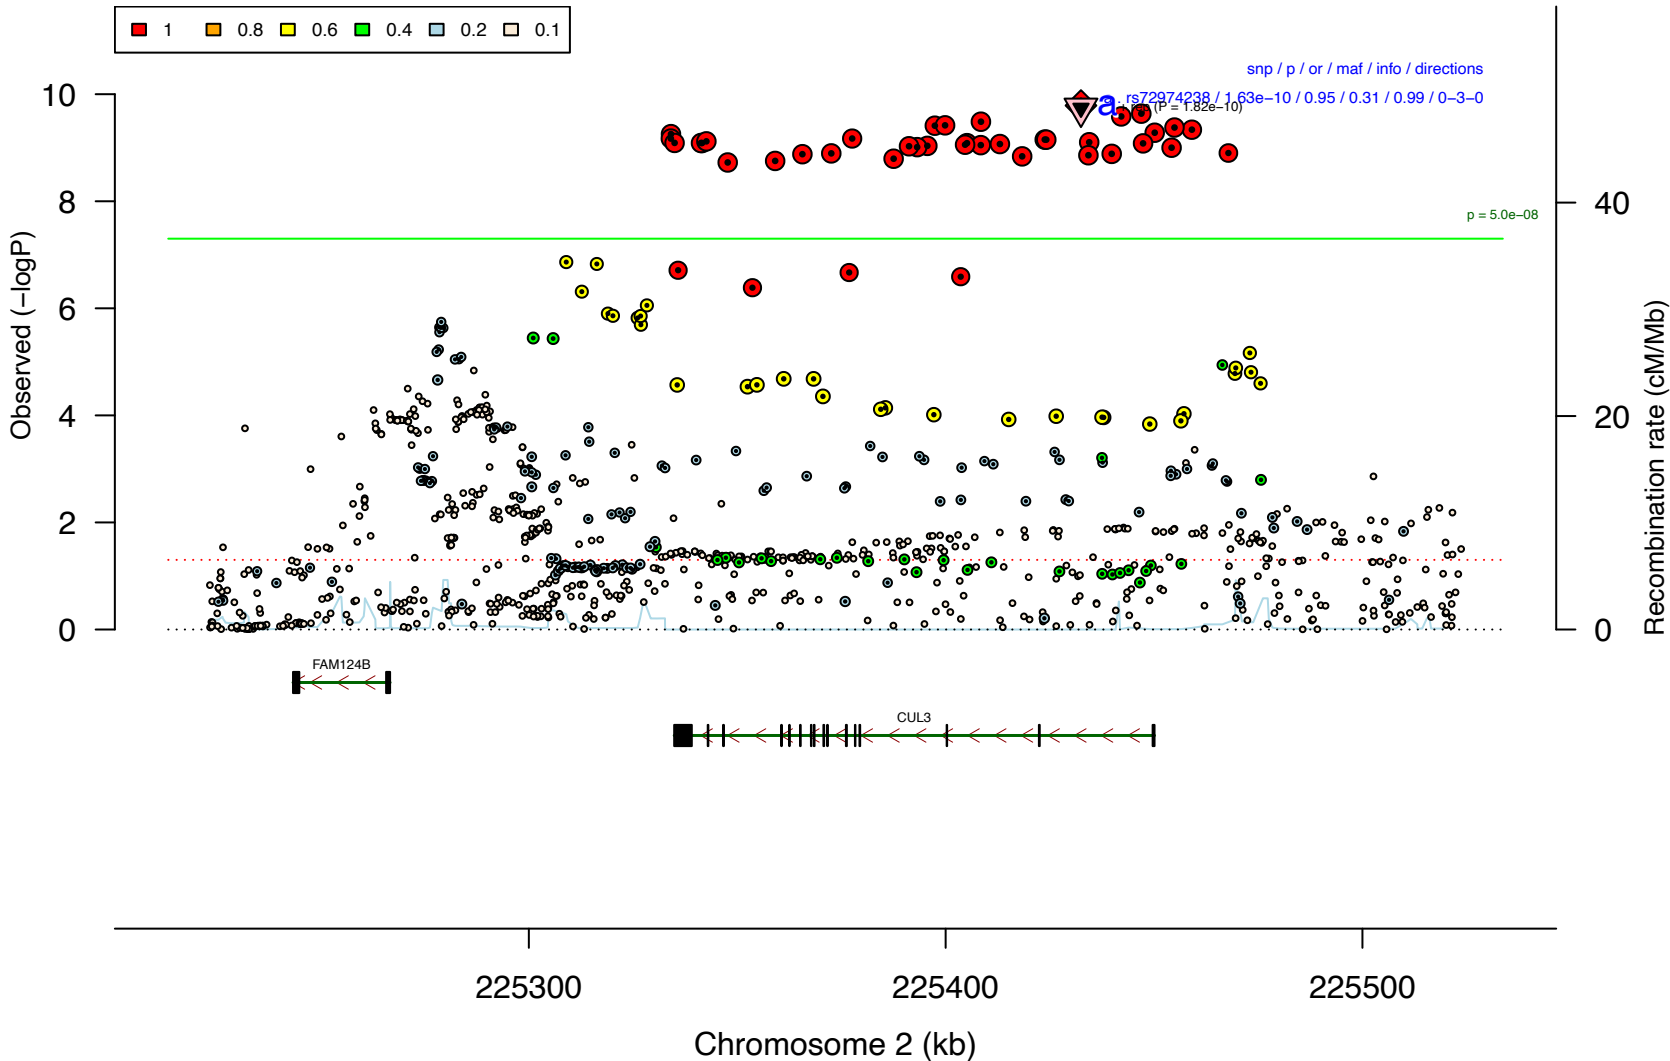

# PGC\_SCZ\_w3\_90\_0418b.106.chr6

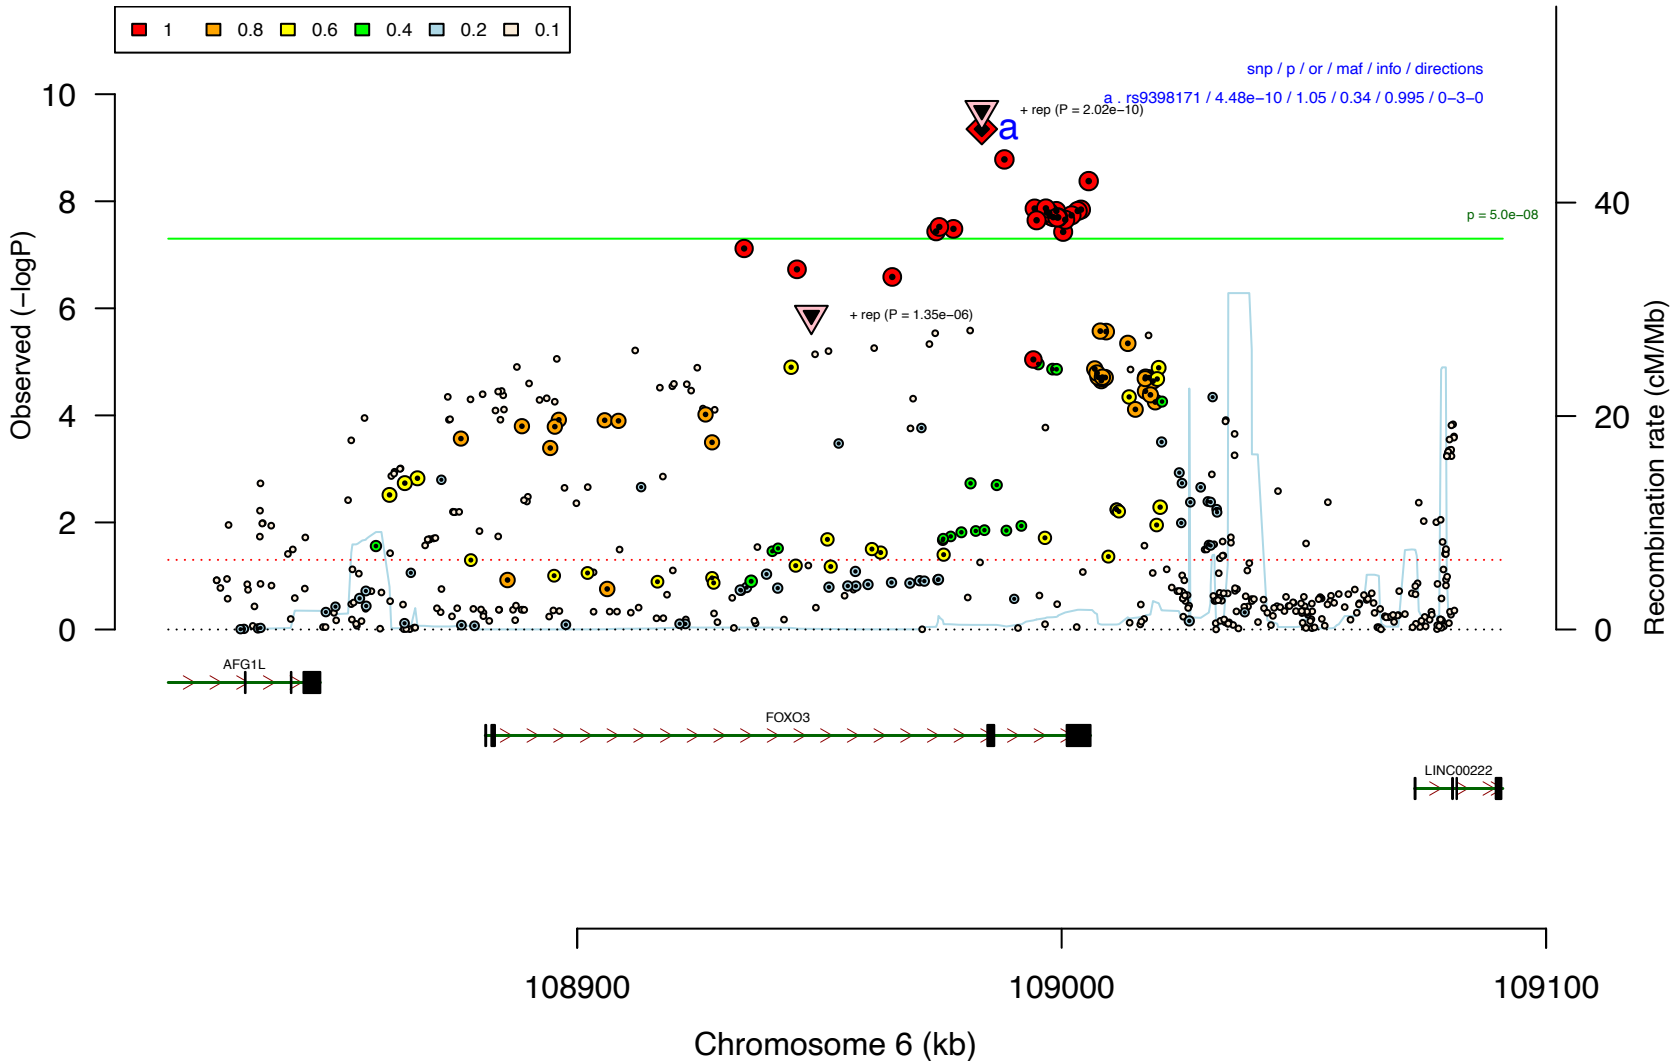

# PGC\_SCZ\_w3\_90\_0418b.107.chr1

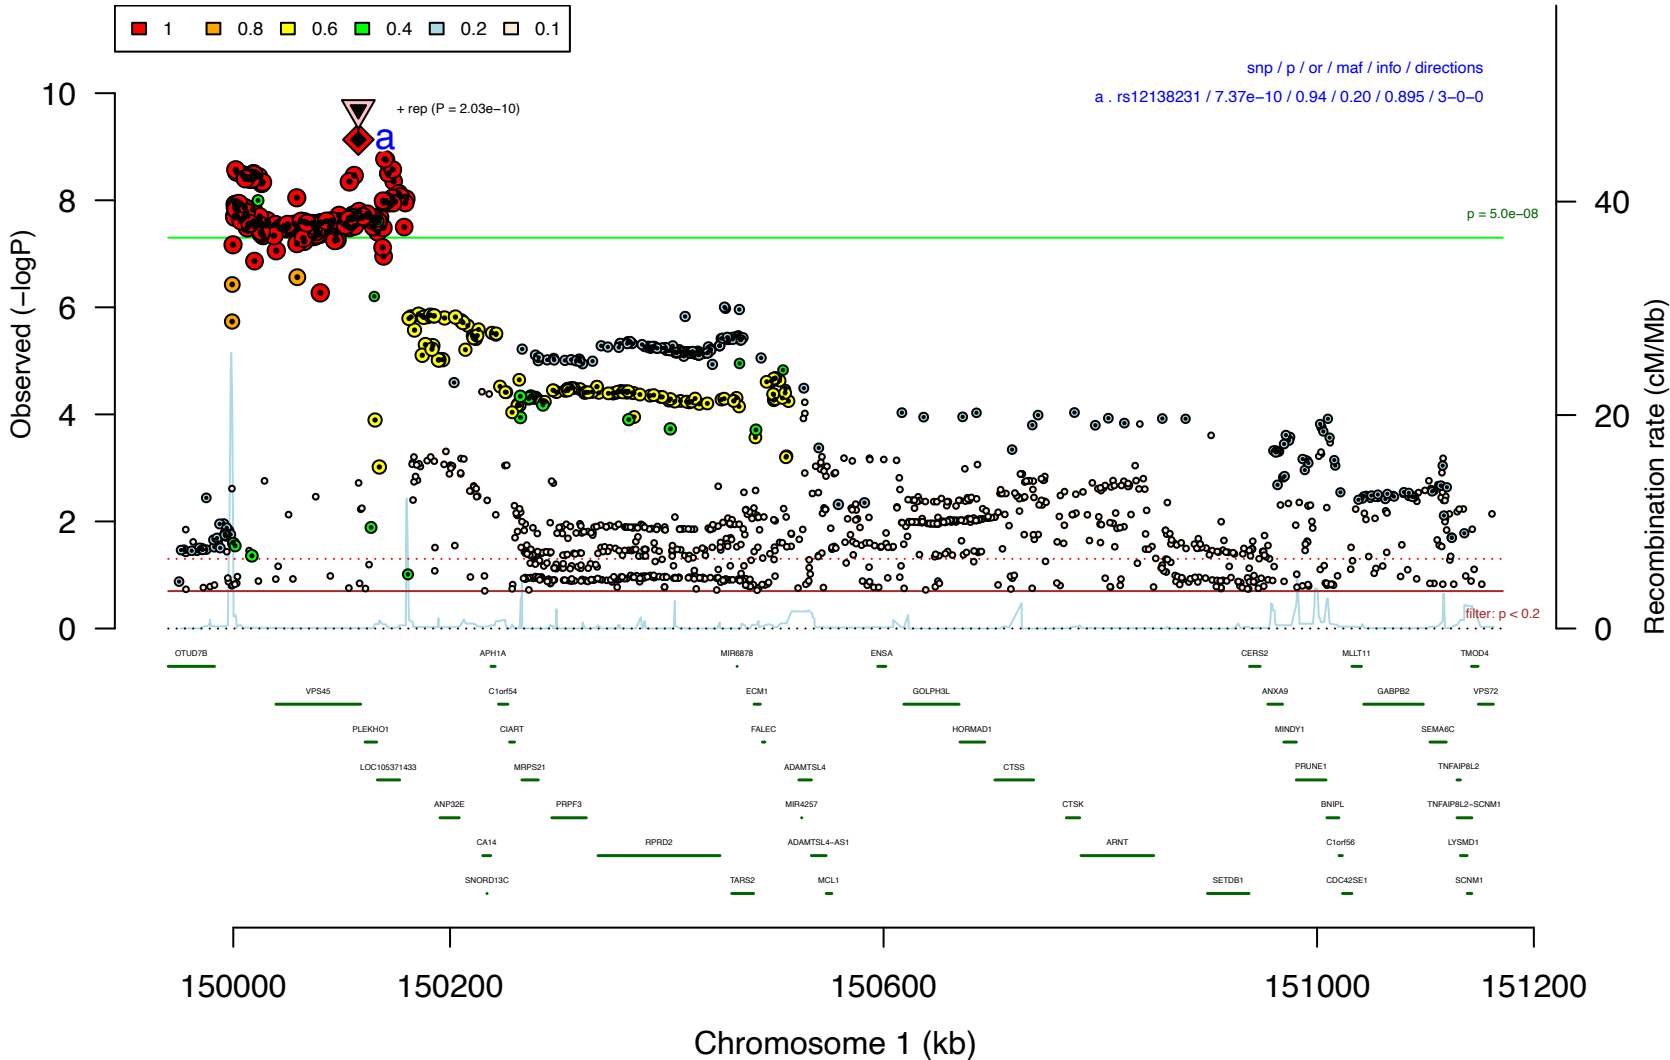

# PGC\_SCZ\_w3\_90\_0418b.108.chr8

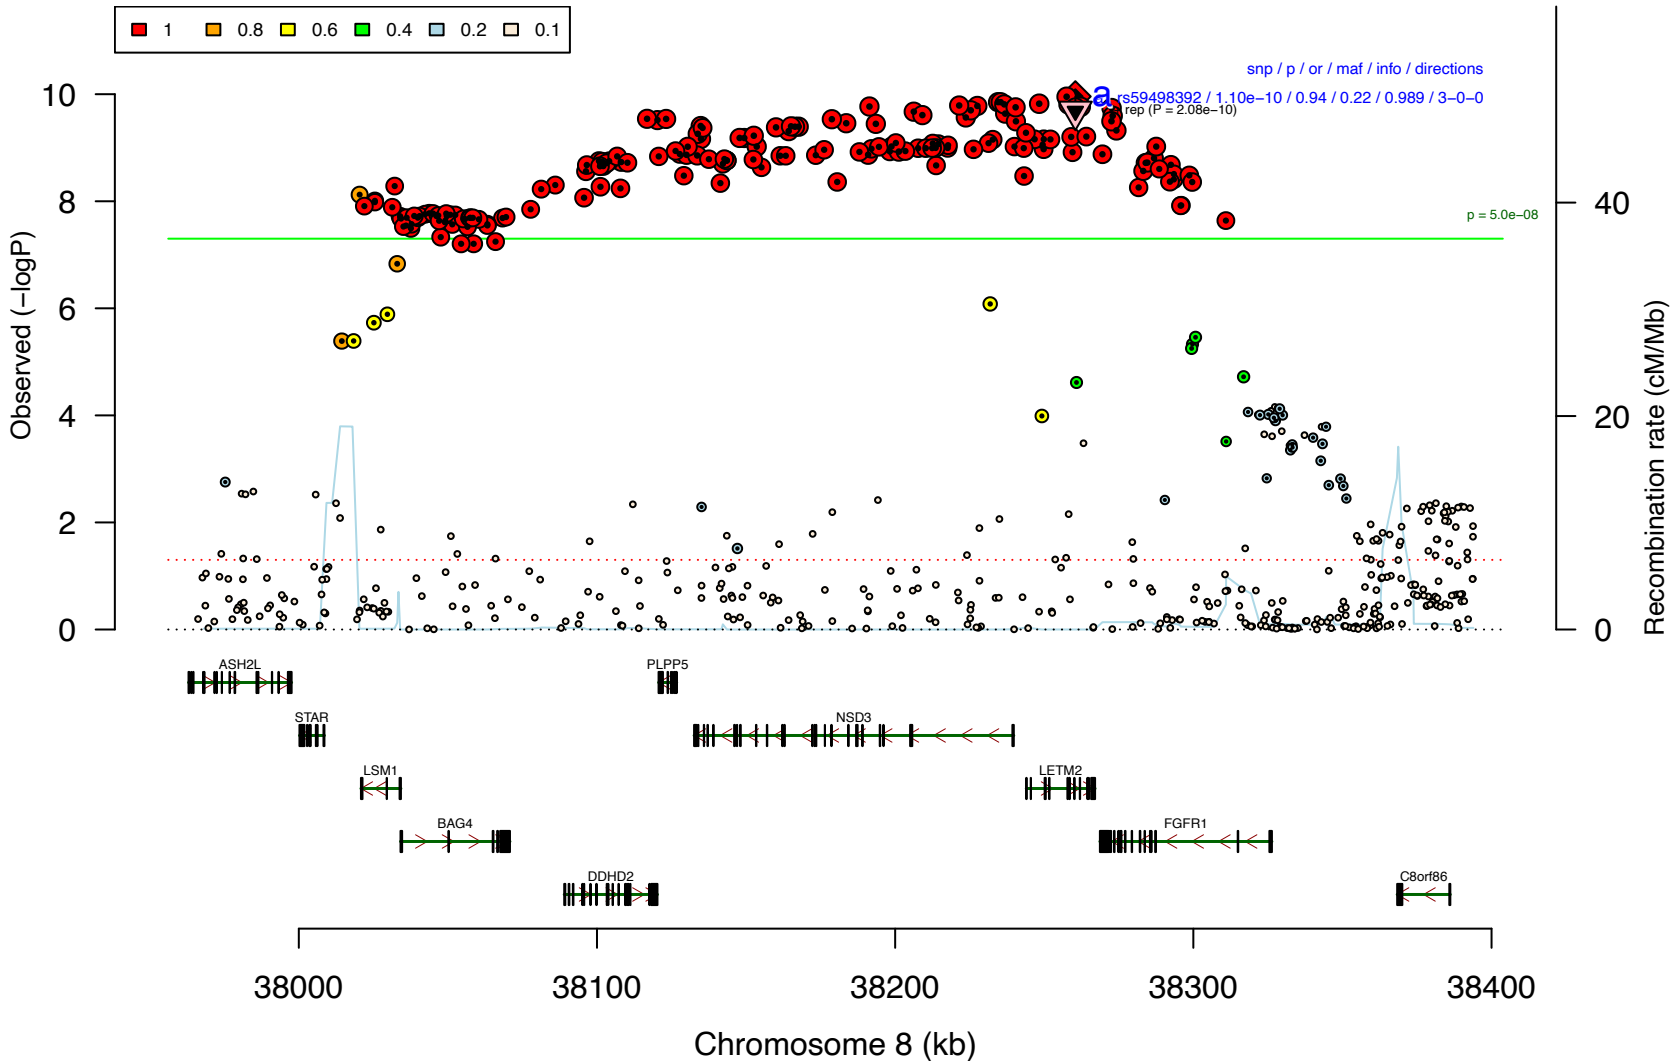



# PGC\_SCZ\_w3\_90\_0418b.109.chr6

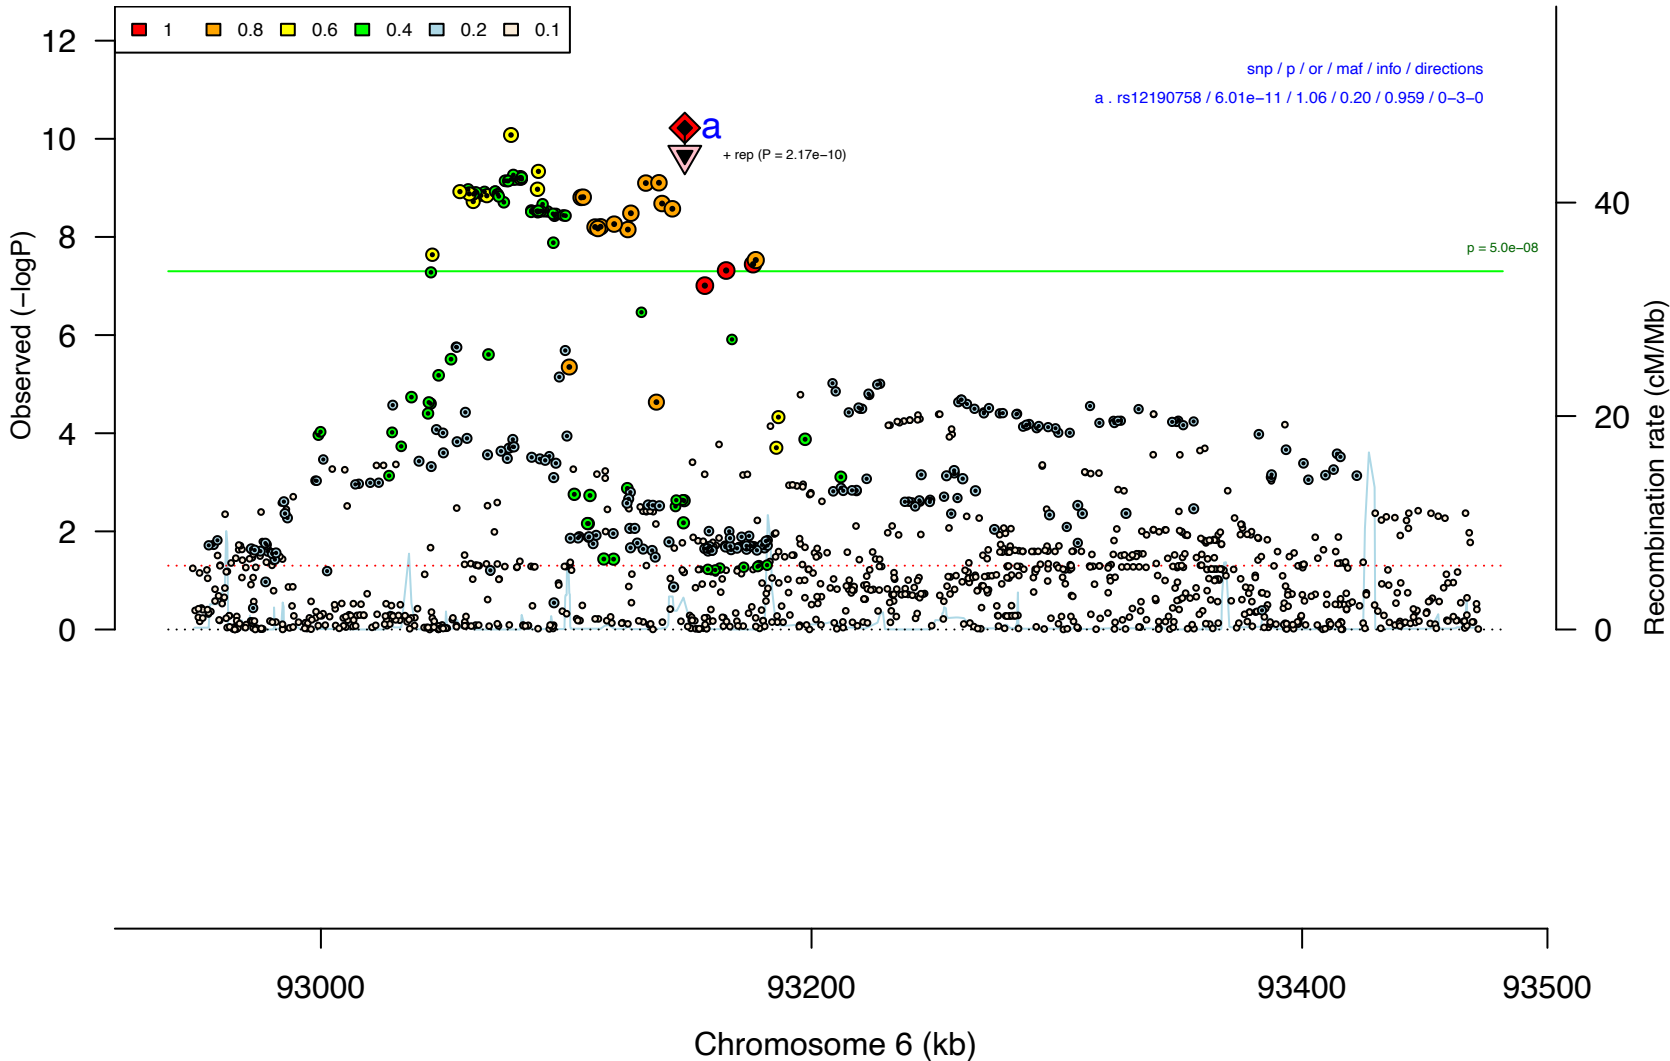

# PGC\_SCZ\_w3\_90\_0418b.110.chr12

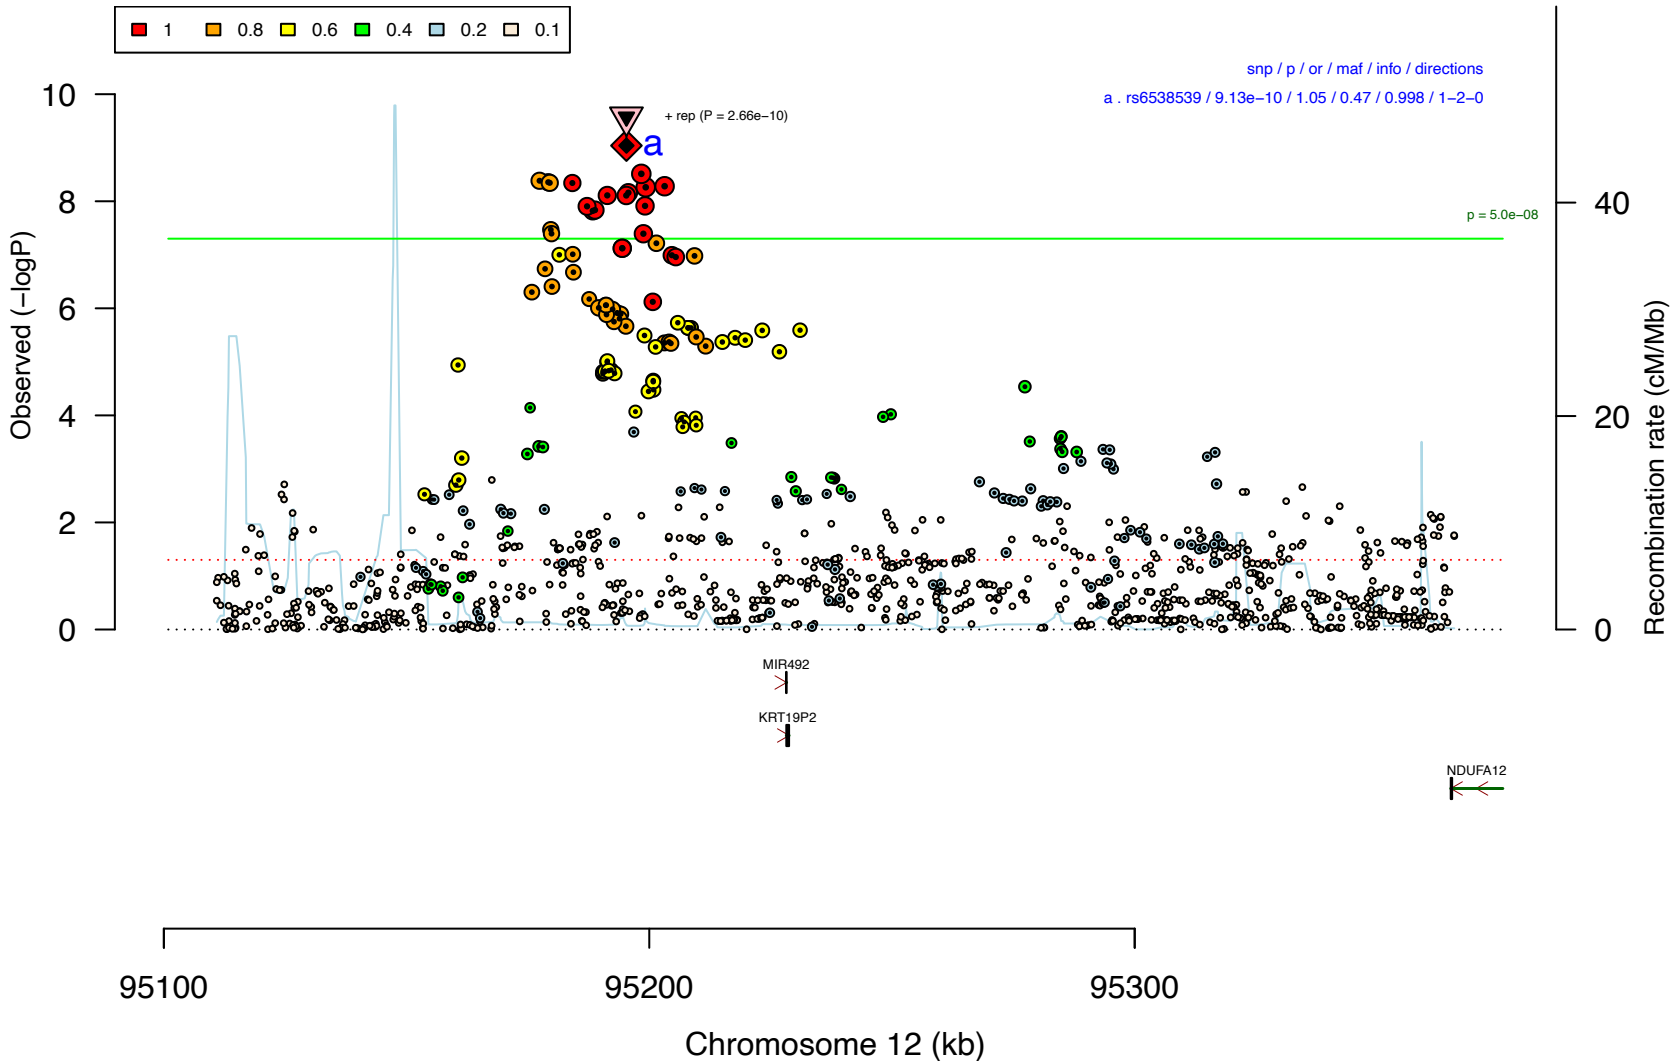

# PGC\_SCZ\_w3\_90\_0418b.111.chr4

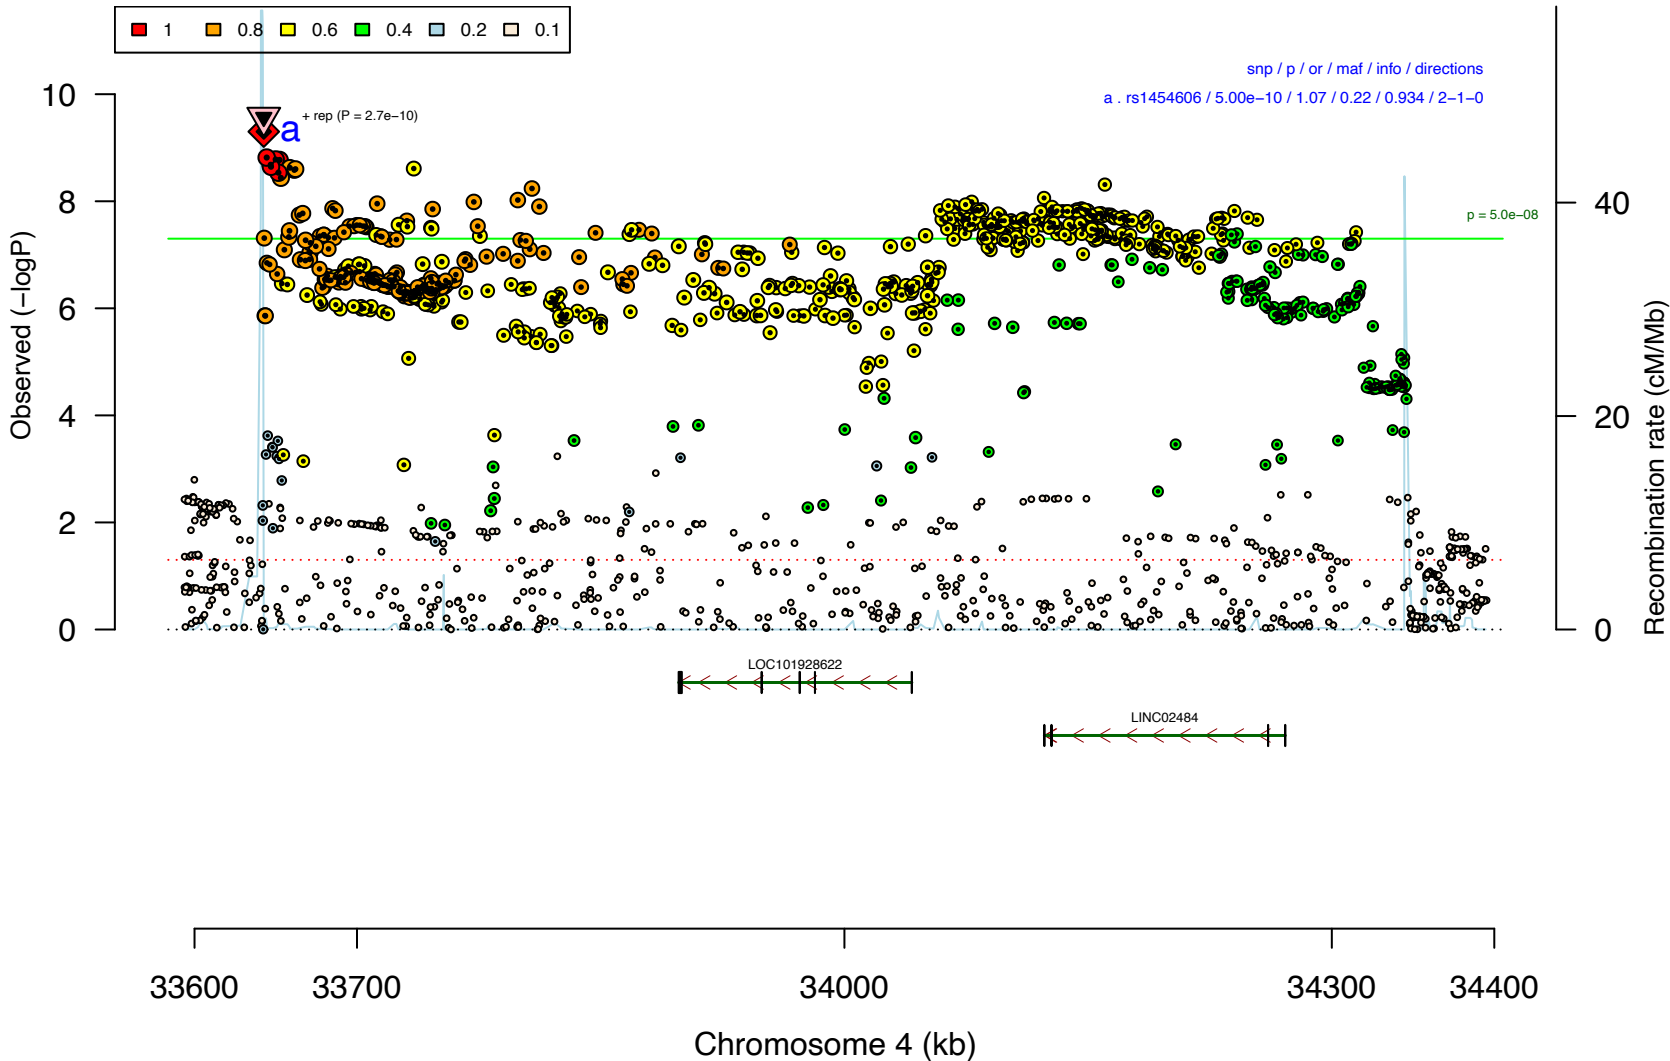

# PGC\_SCZ\_w3\_90\_0418b.112.chr16

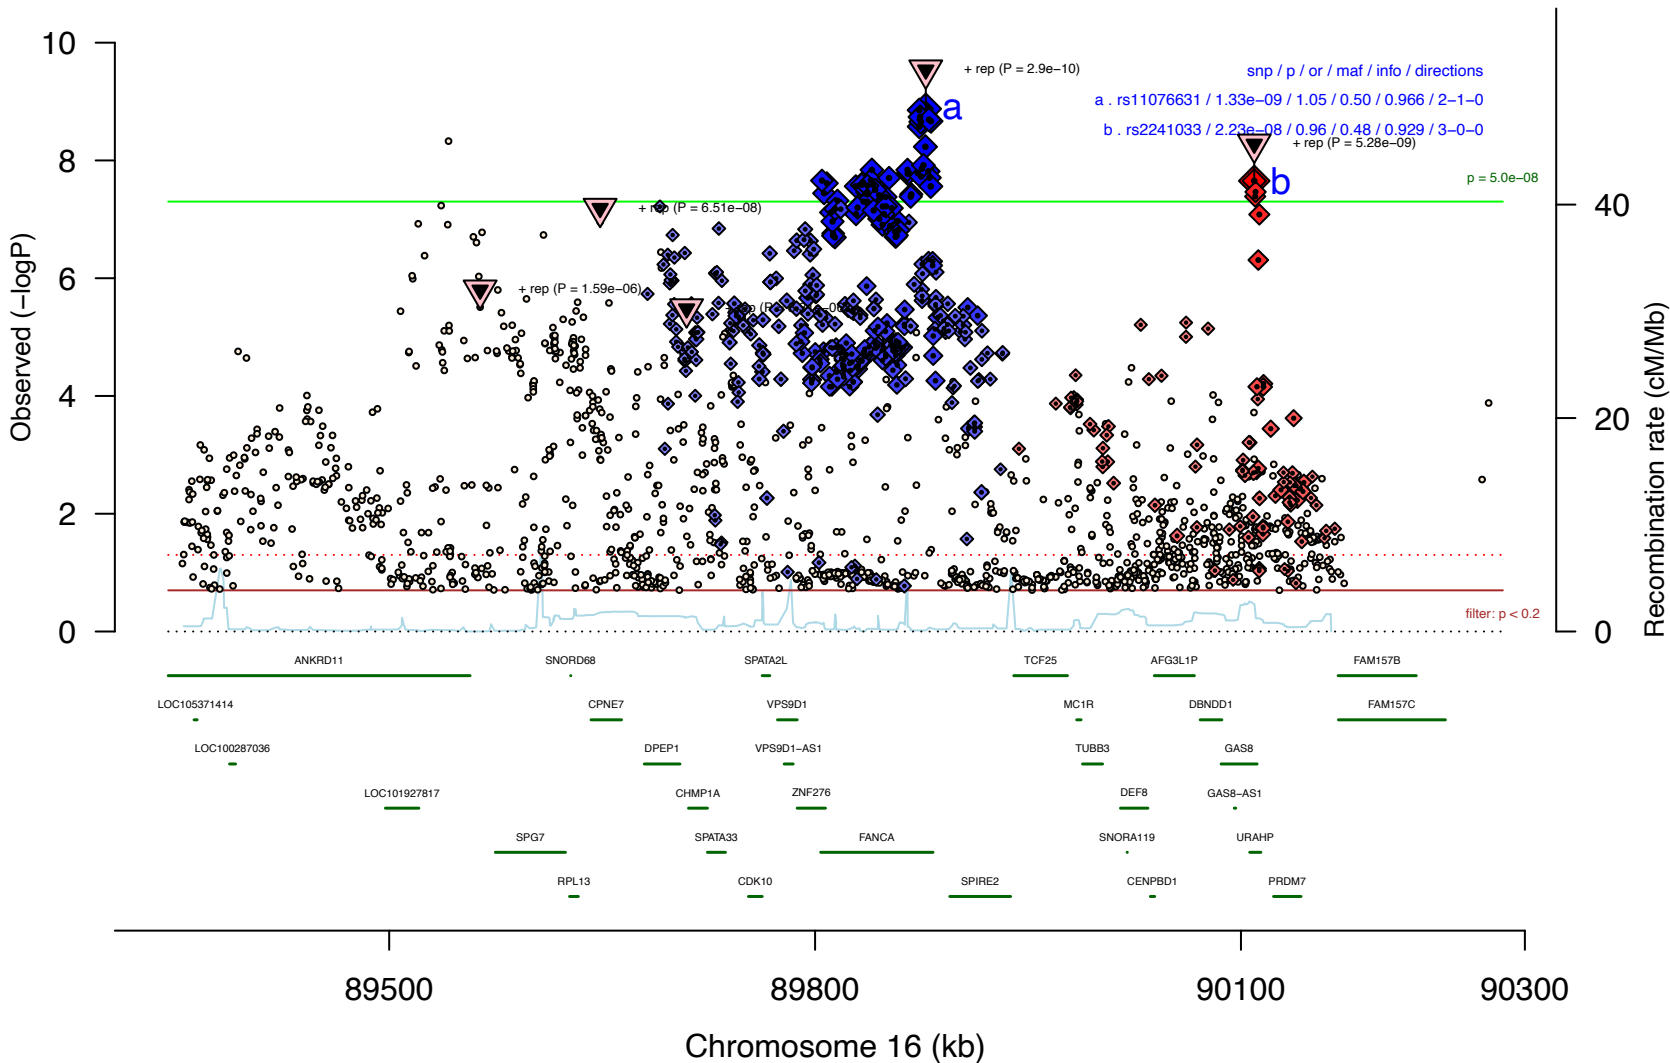

# PGC\_SCZ\_w3\_90\_0418b.113.chr11

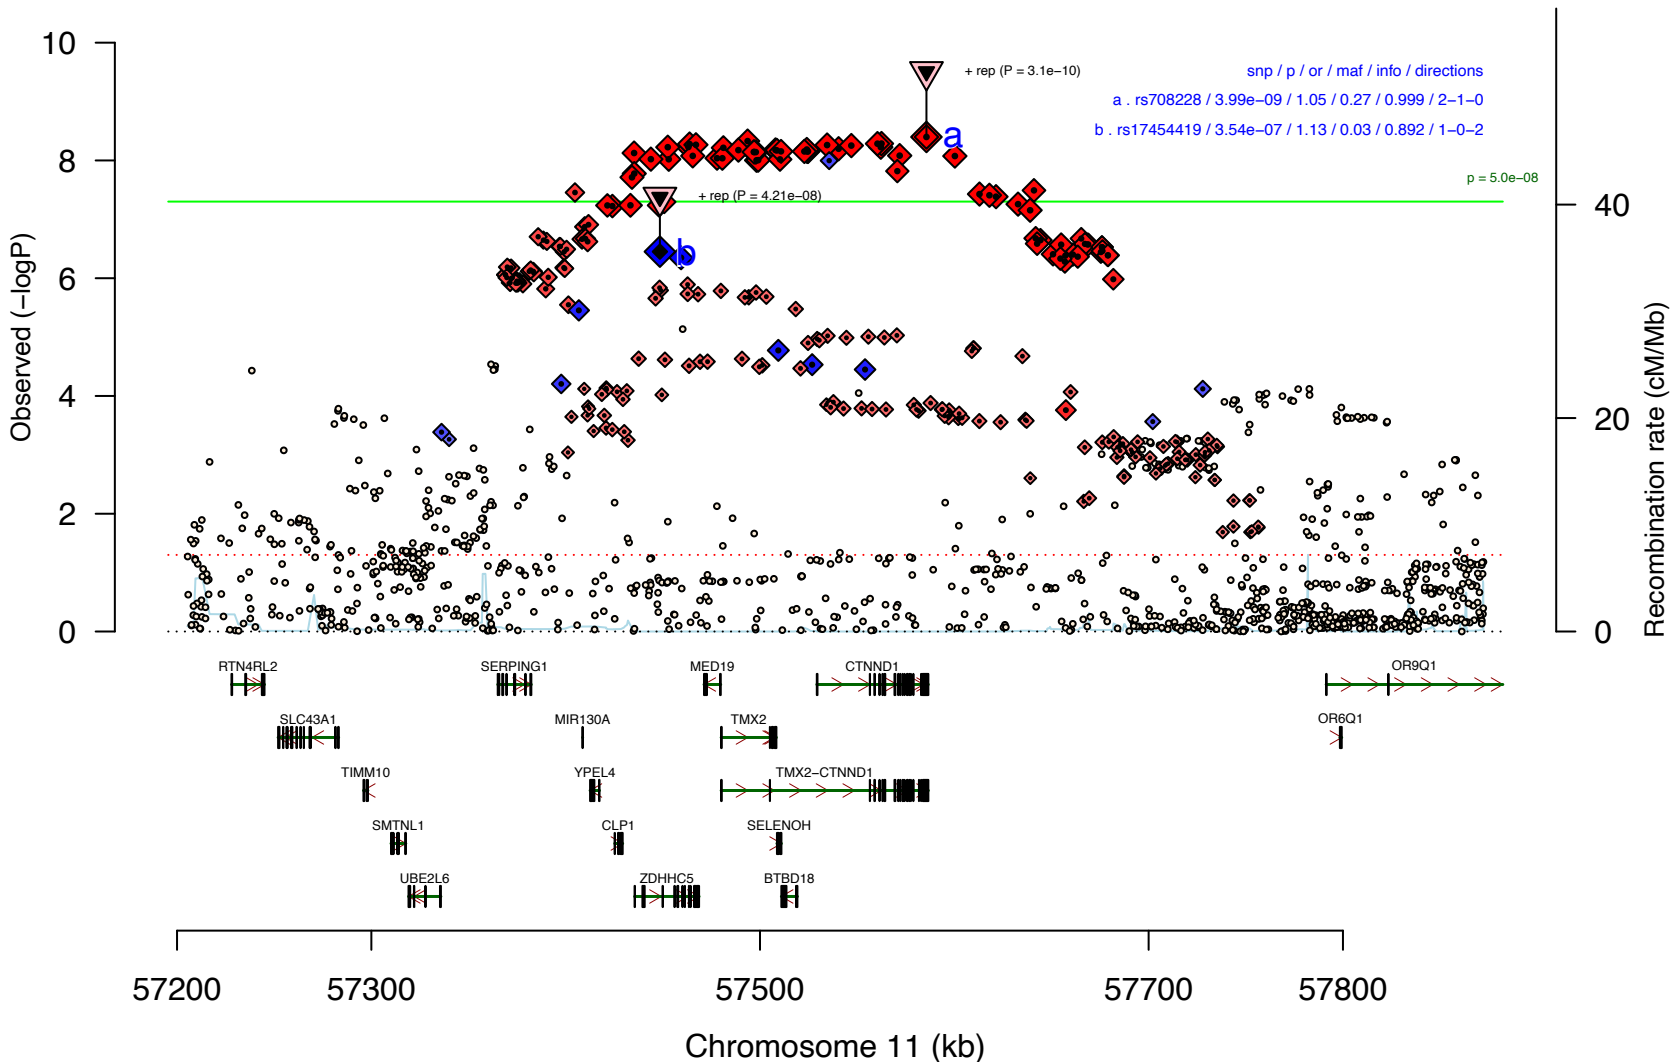

# PGC\_SCZ\_w3\_90\_0418b.114.chr12

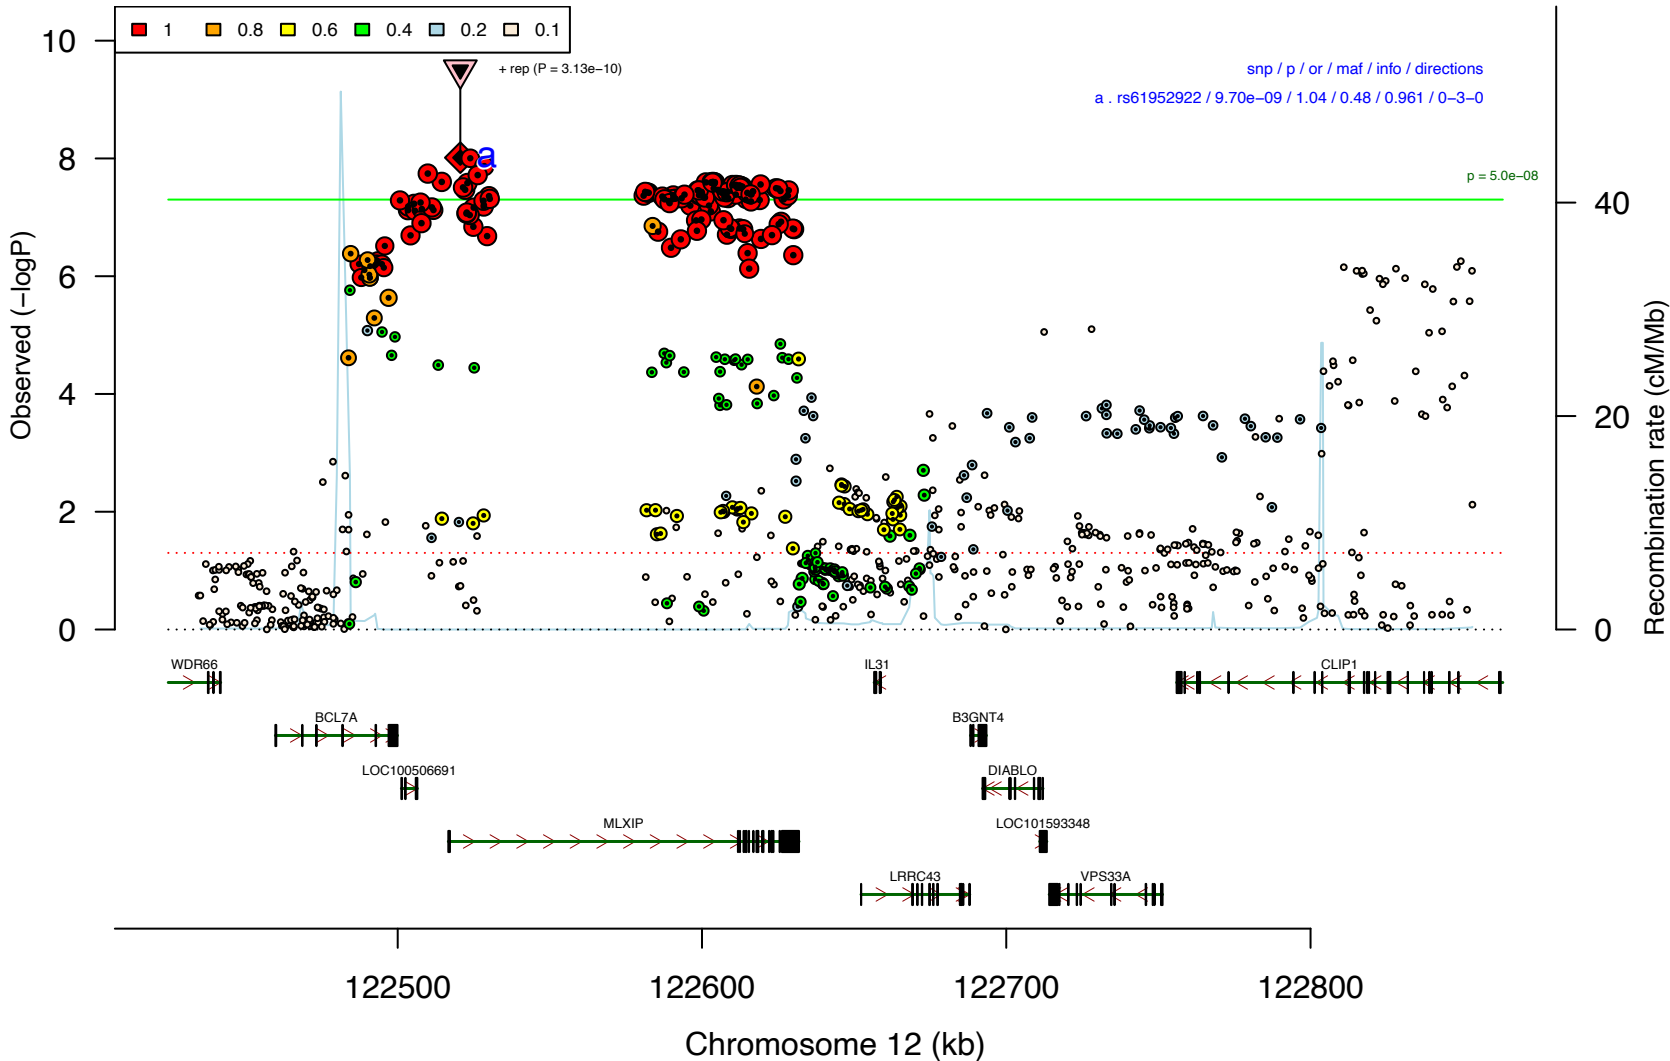

# PGC\_SCZ\_w3\_90\_0418b.115.chr17

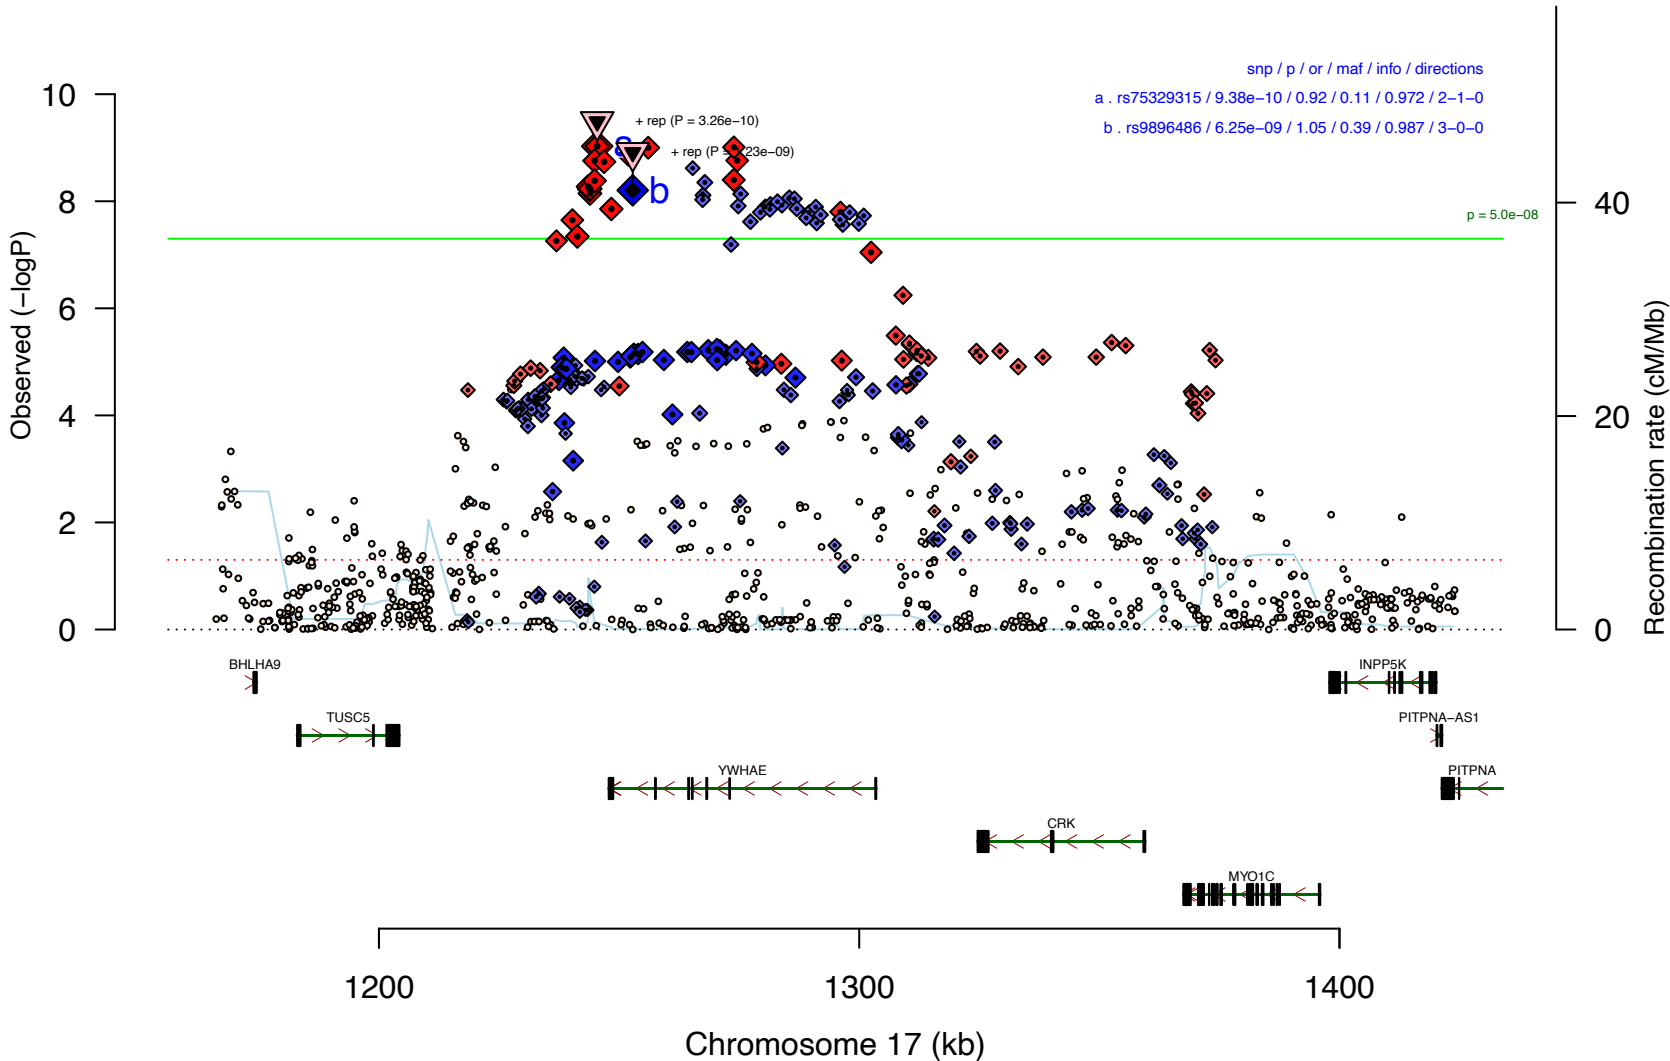

# PGC\_SCZ\_w3\_90\_0418b.116.chr13

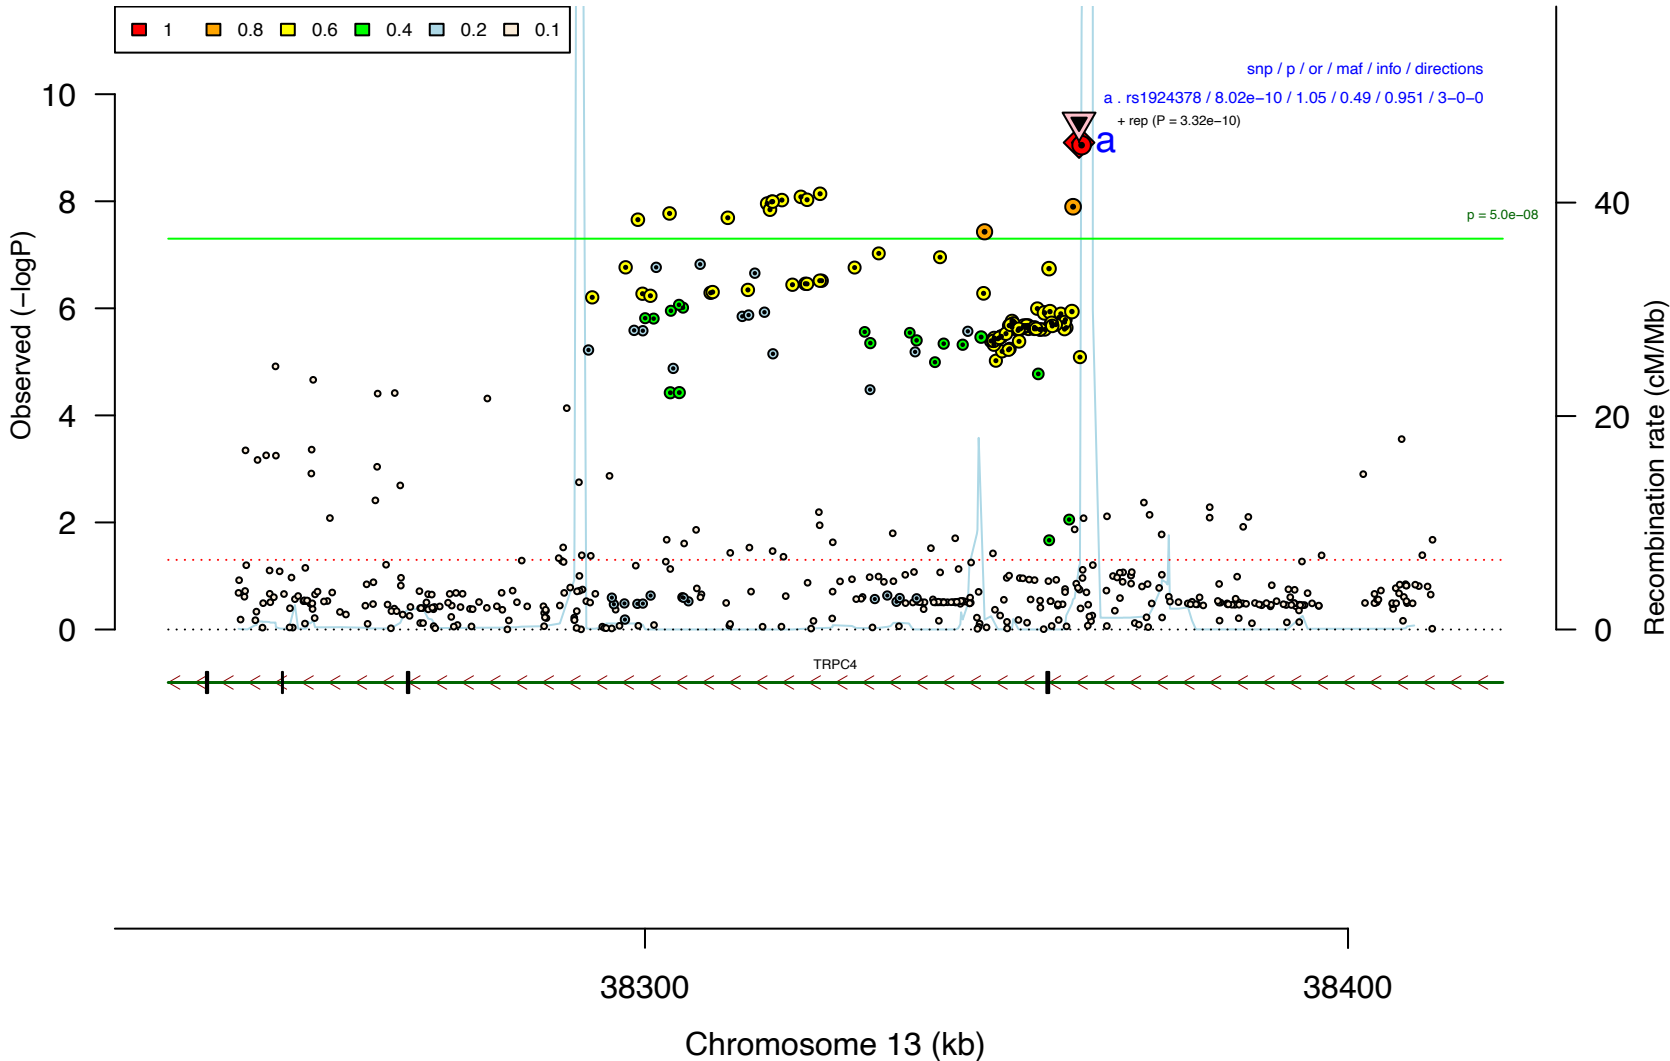



# PGC\_SCZ\_w3\_90\_0418b.117.chr8

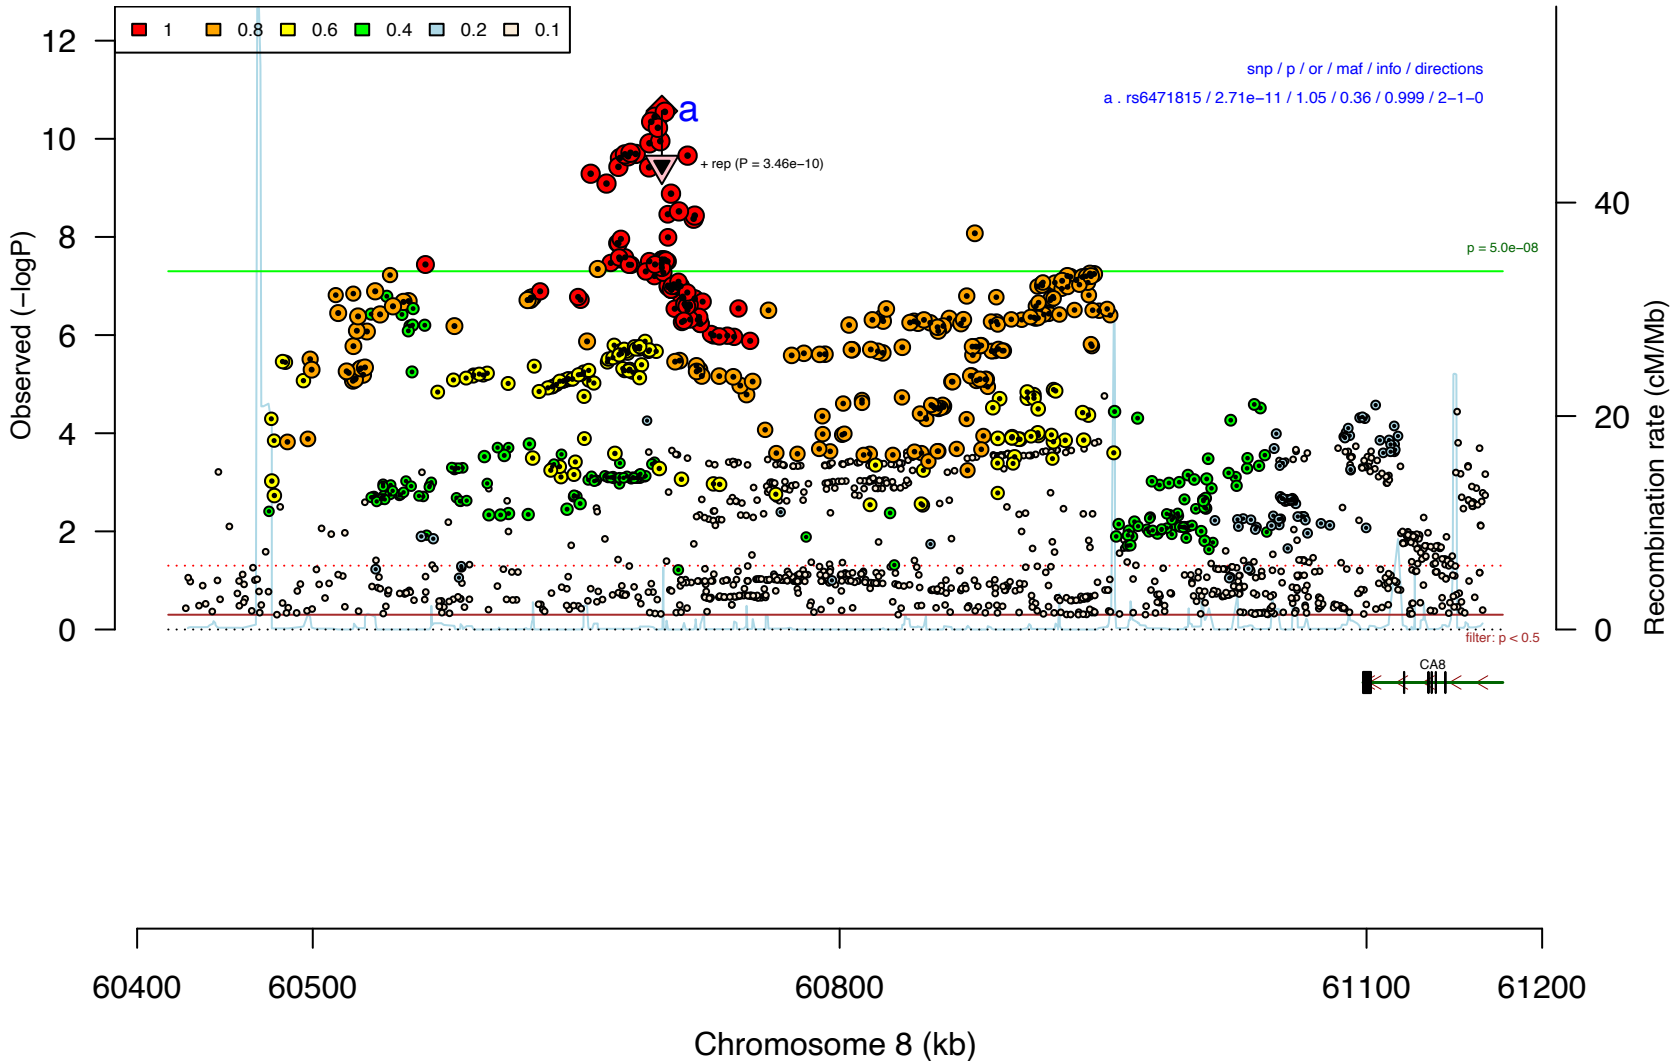

# PGC\_SCZ\_w3\_90\_0418b.118.chr19

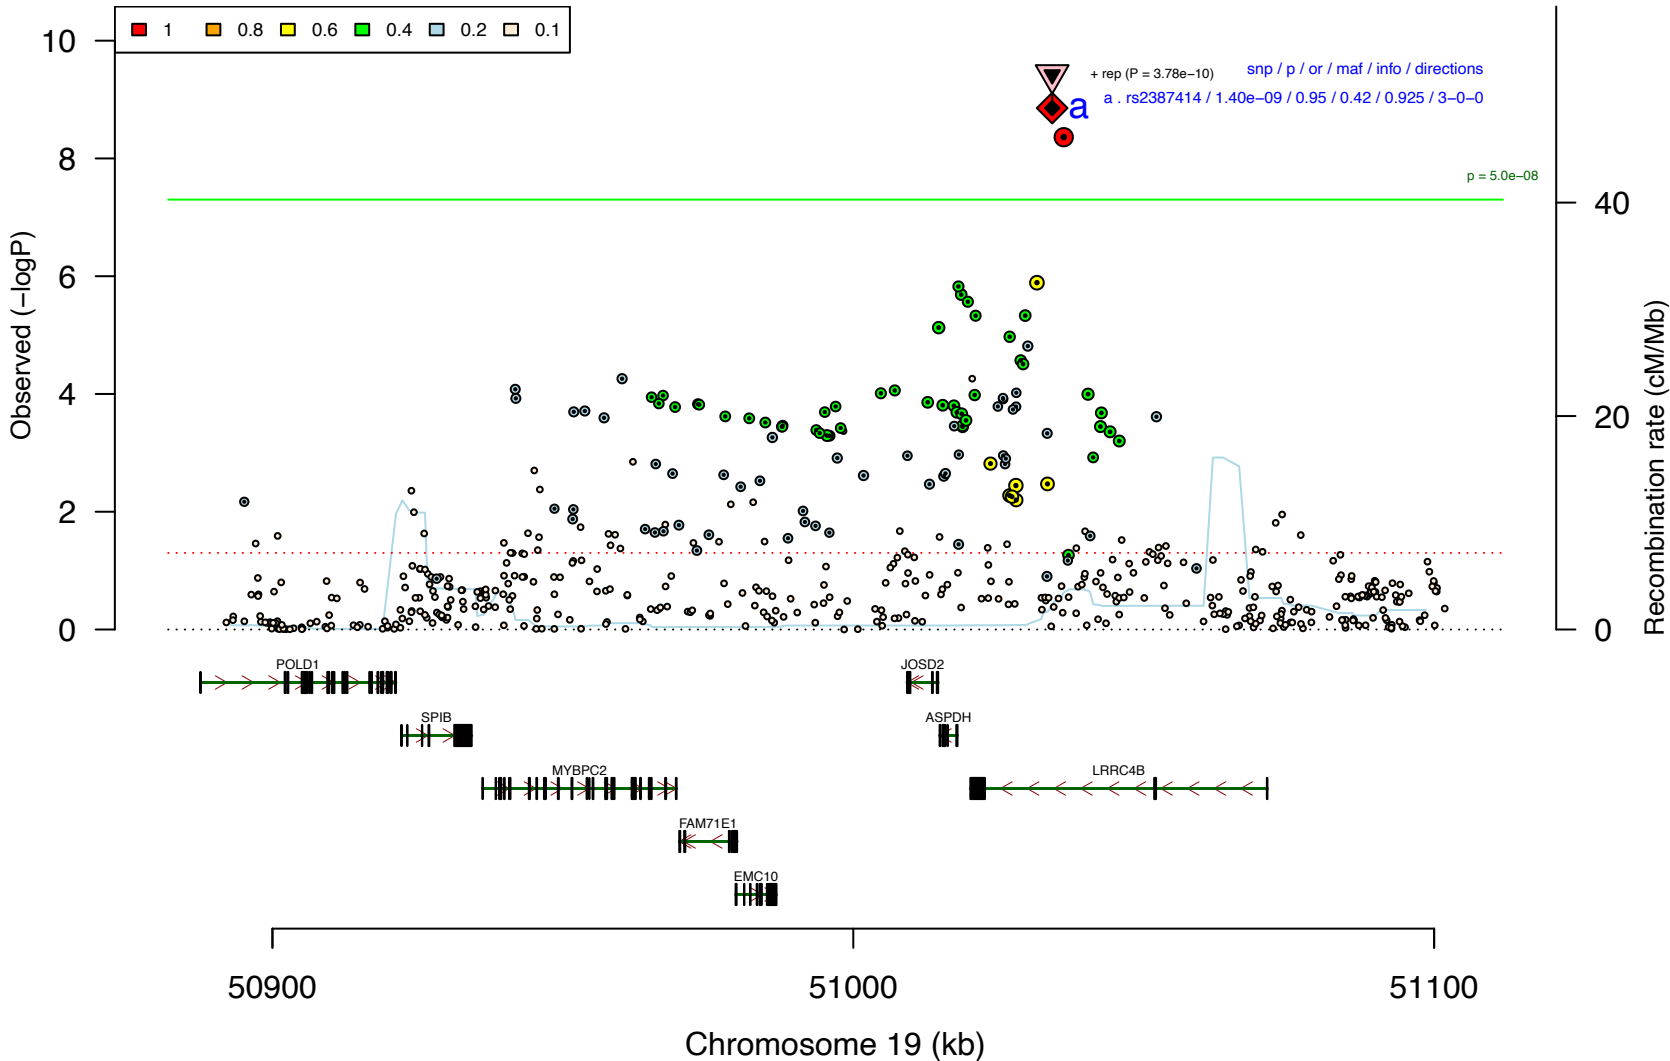

# PGC\_SCZ\_w3\_90\_0418b.119.chr1

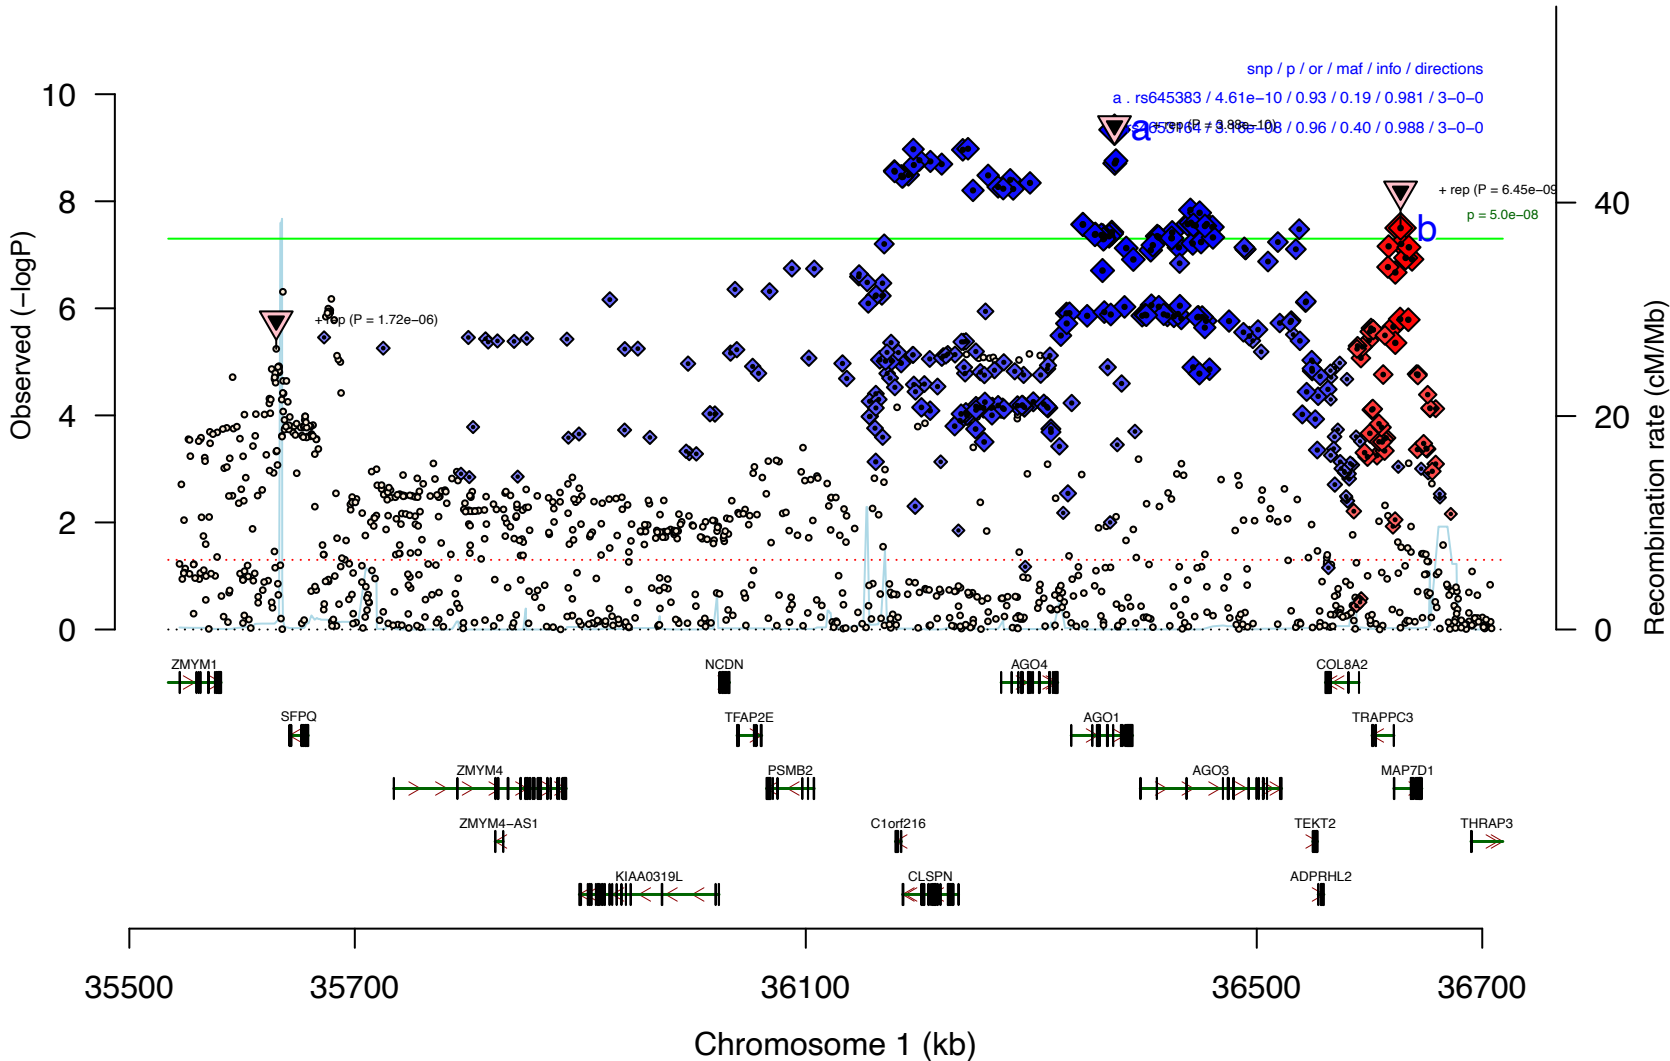

# PGC\_SCZ\_w3\_90\_0418b.120.chr8

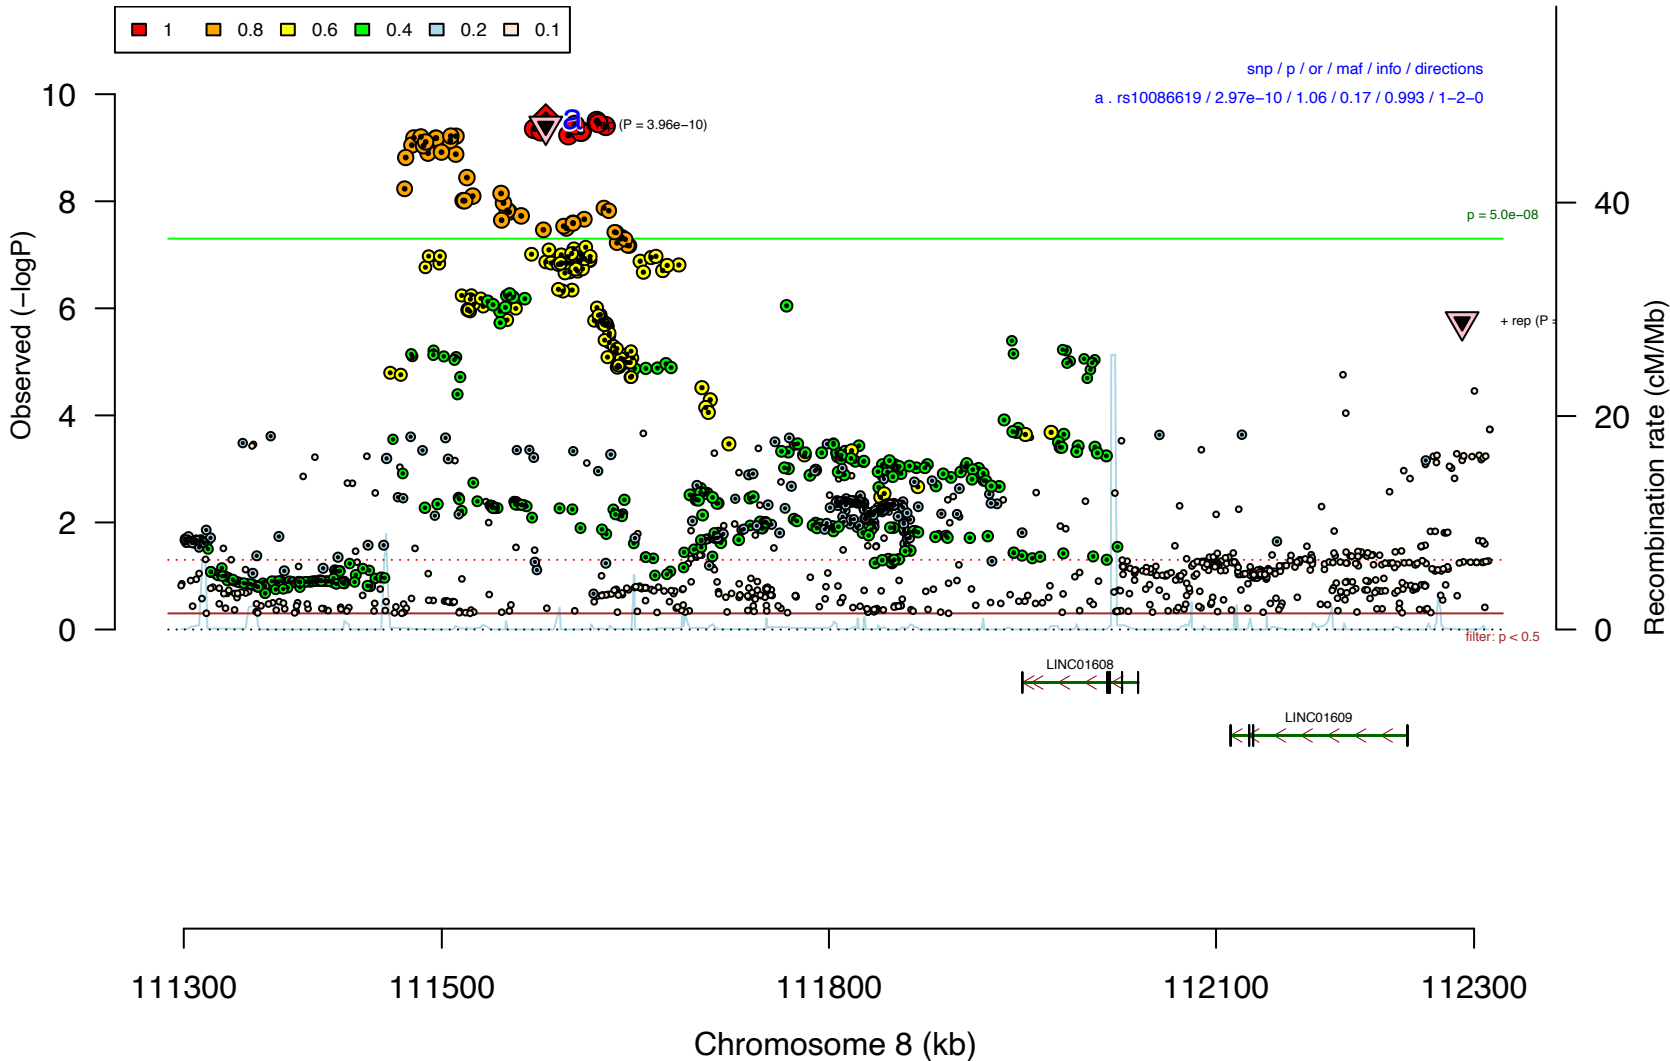

# PGC\_SCZ\_w3\_90\_0418b.121.chr1

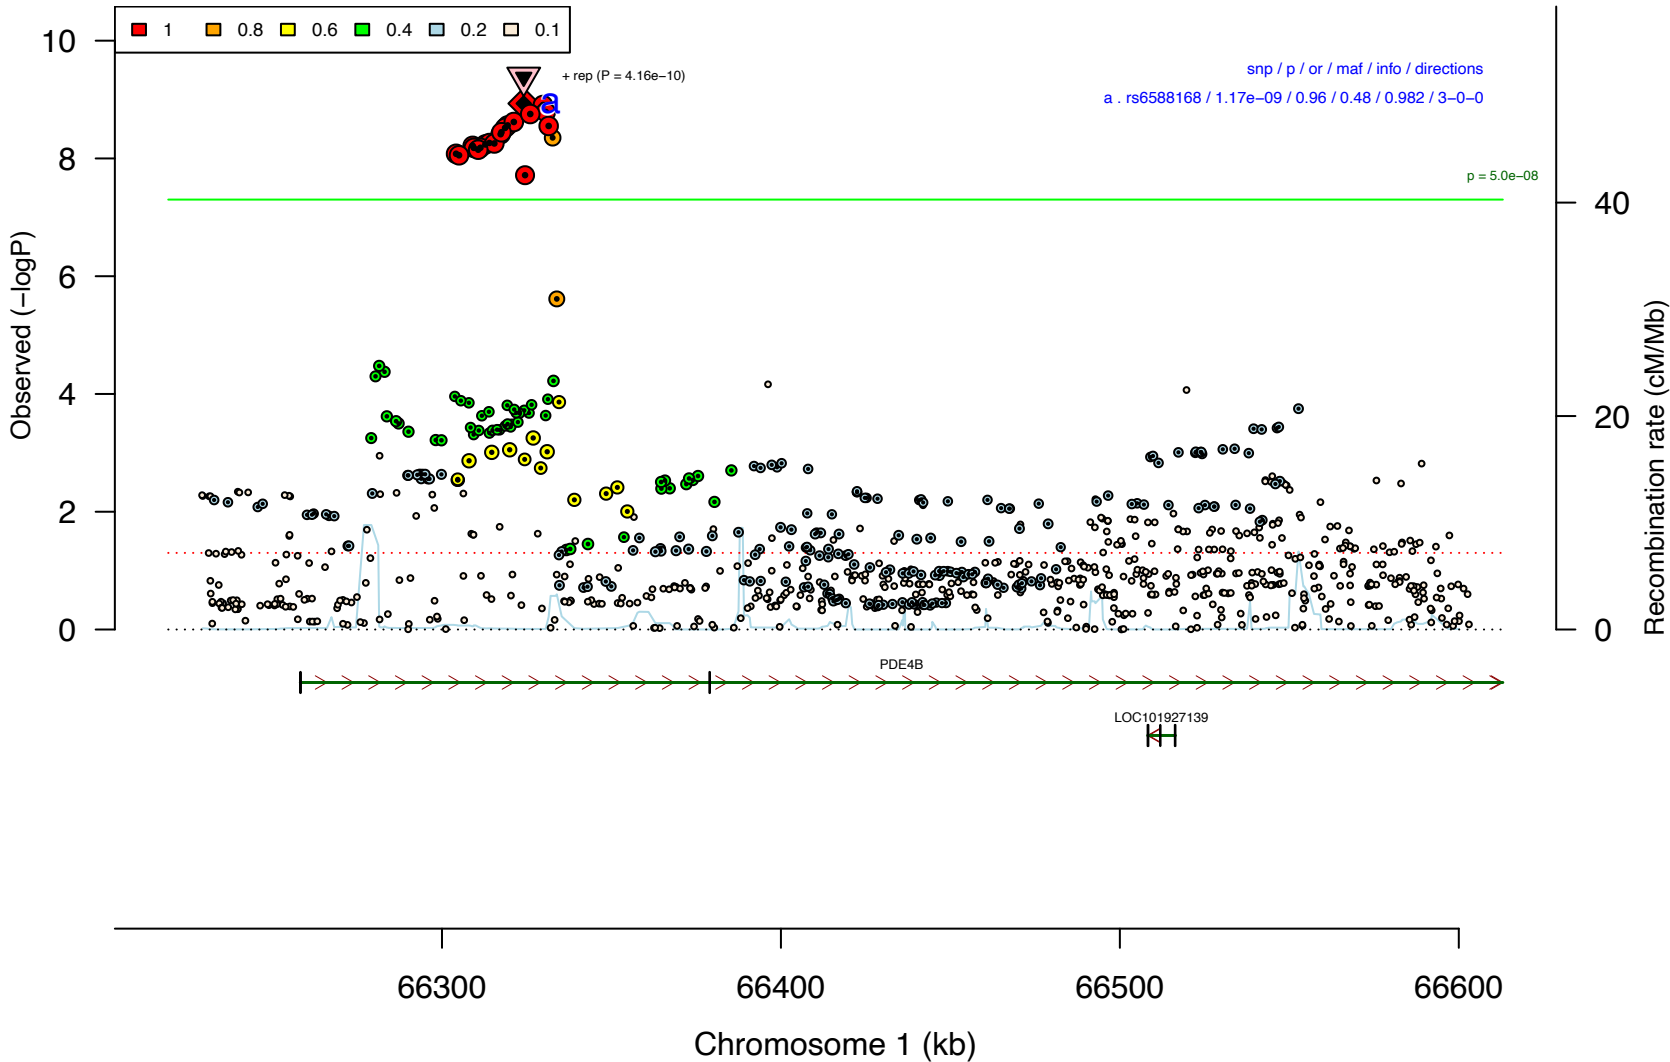

# PGC\_SCZ\_w3\_90\_0418b.122.chr14

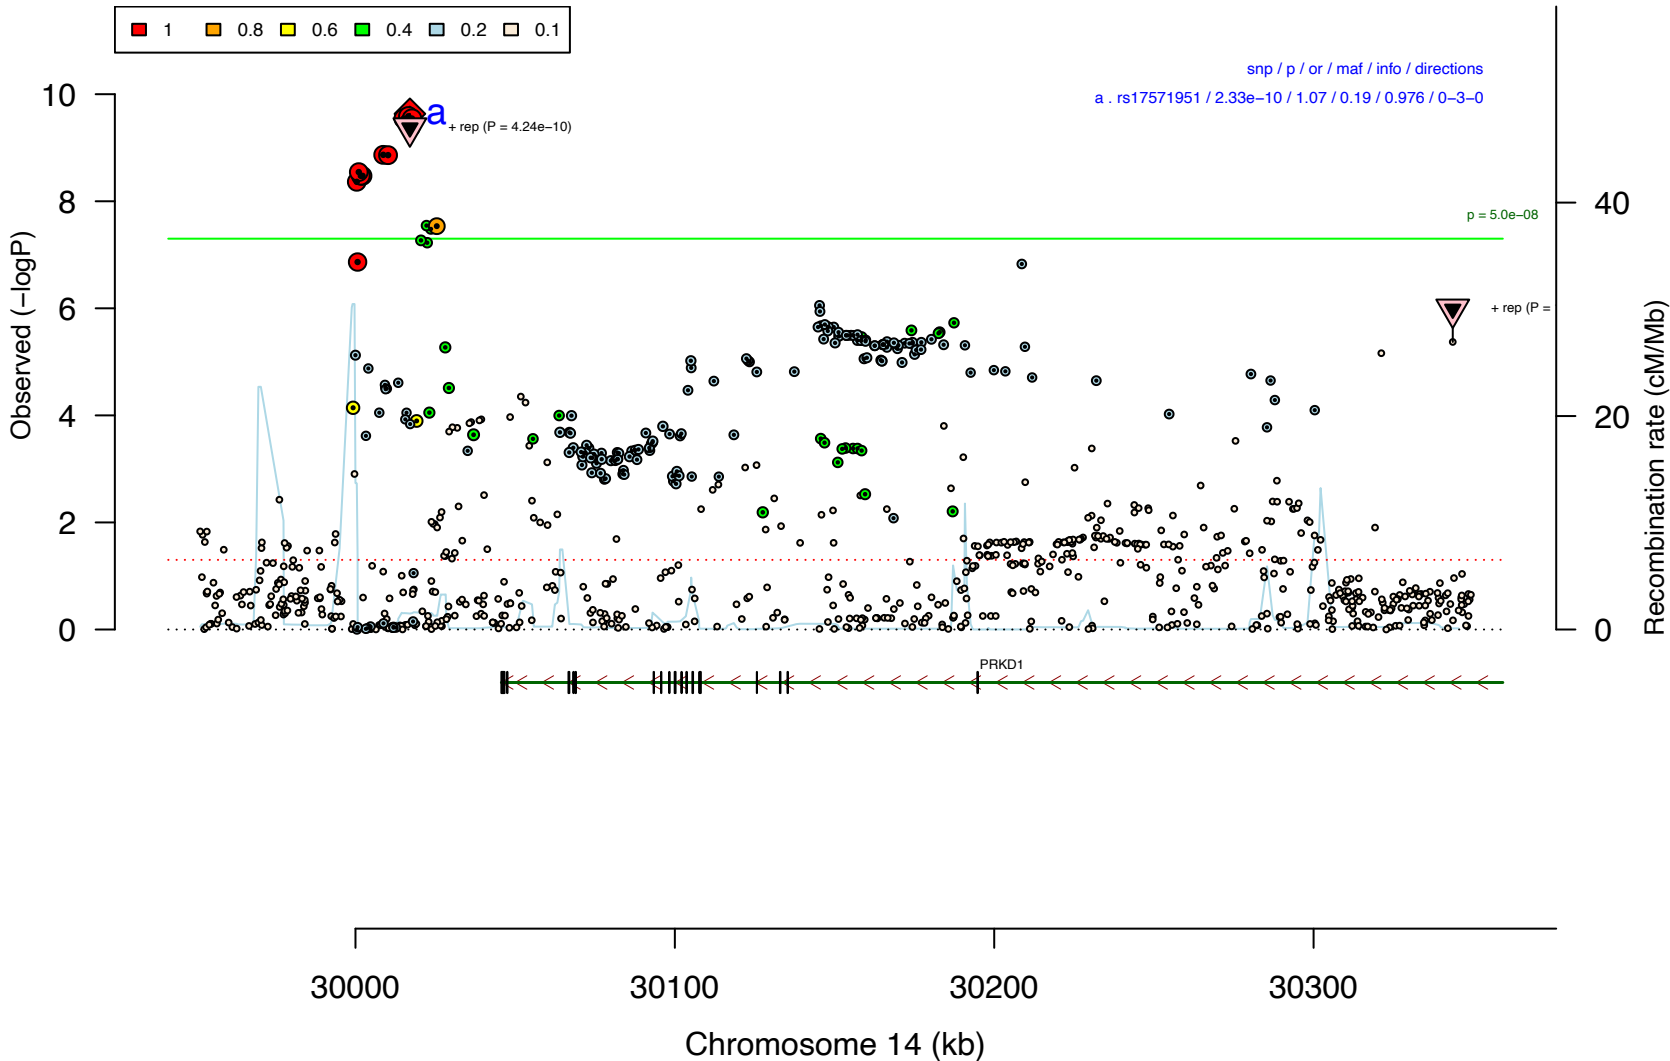

# PGC\_SCZ\_w3\_90\_0418b.123.chr5

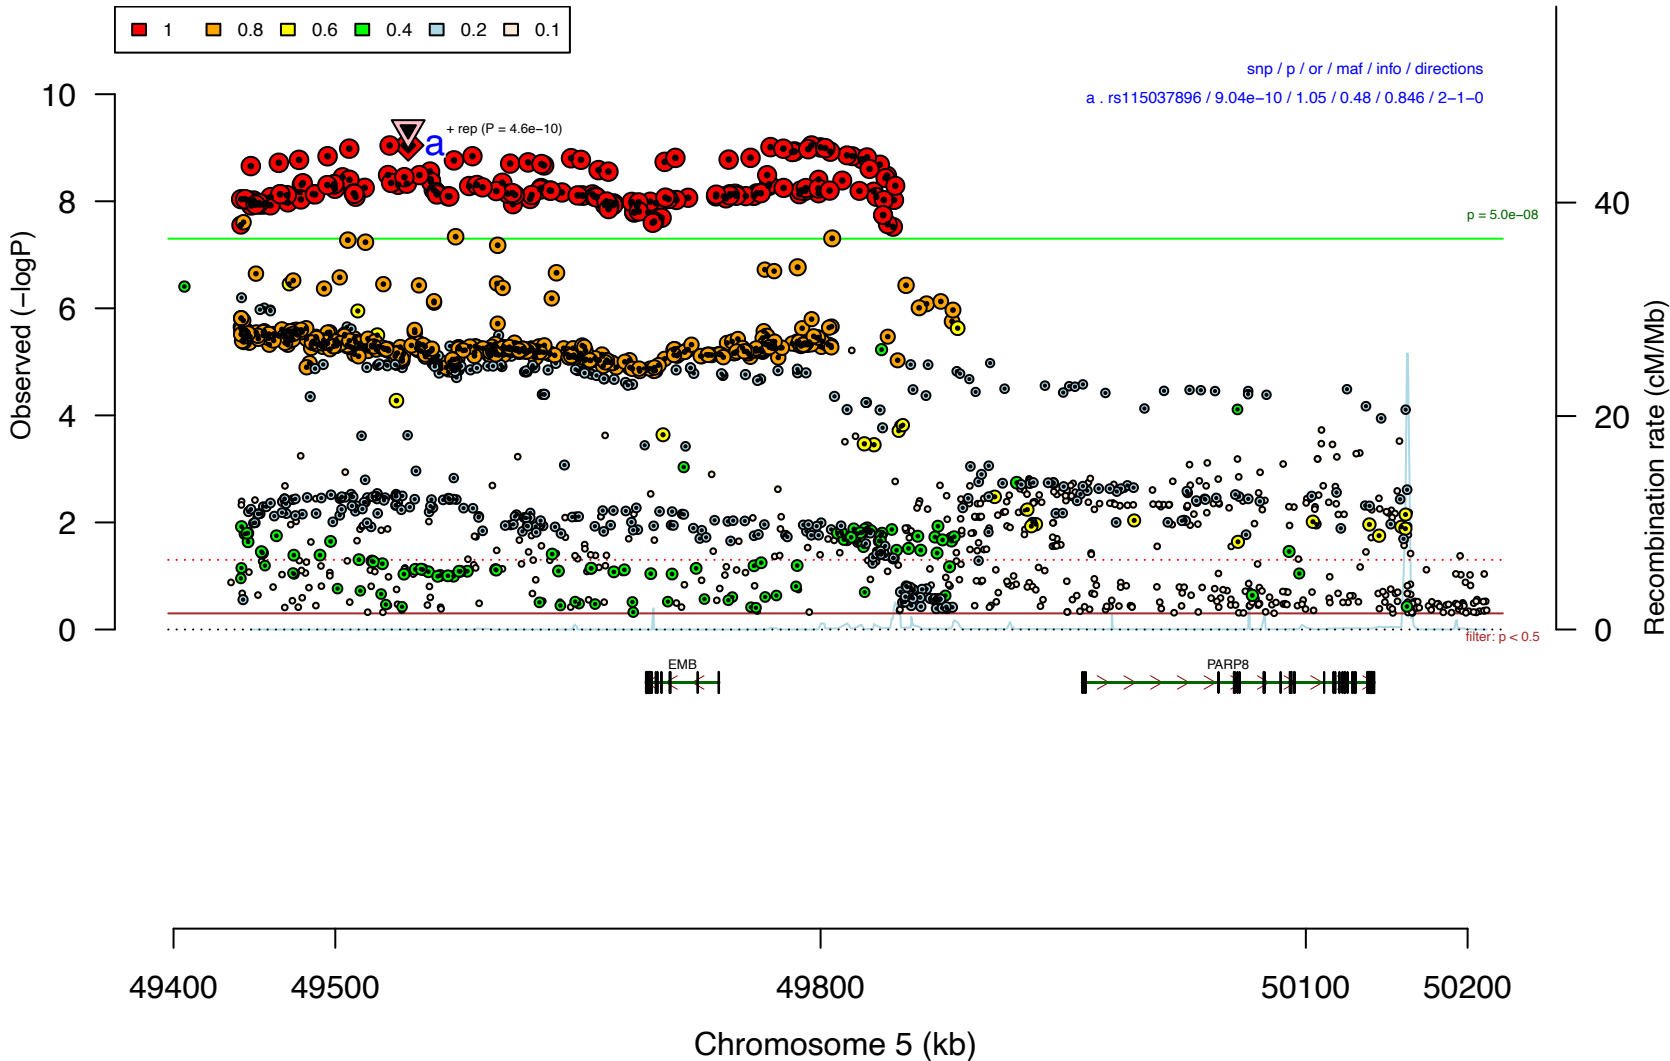

# PGC\_SCZ\_w3\_90\_0418b.124.chr1

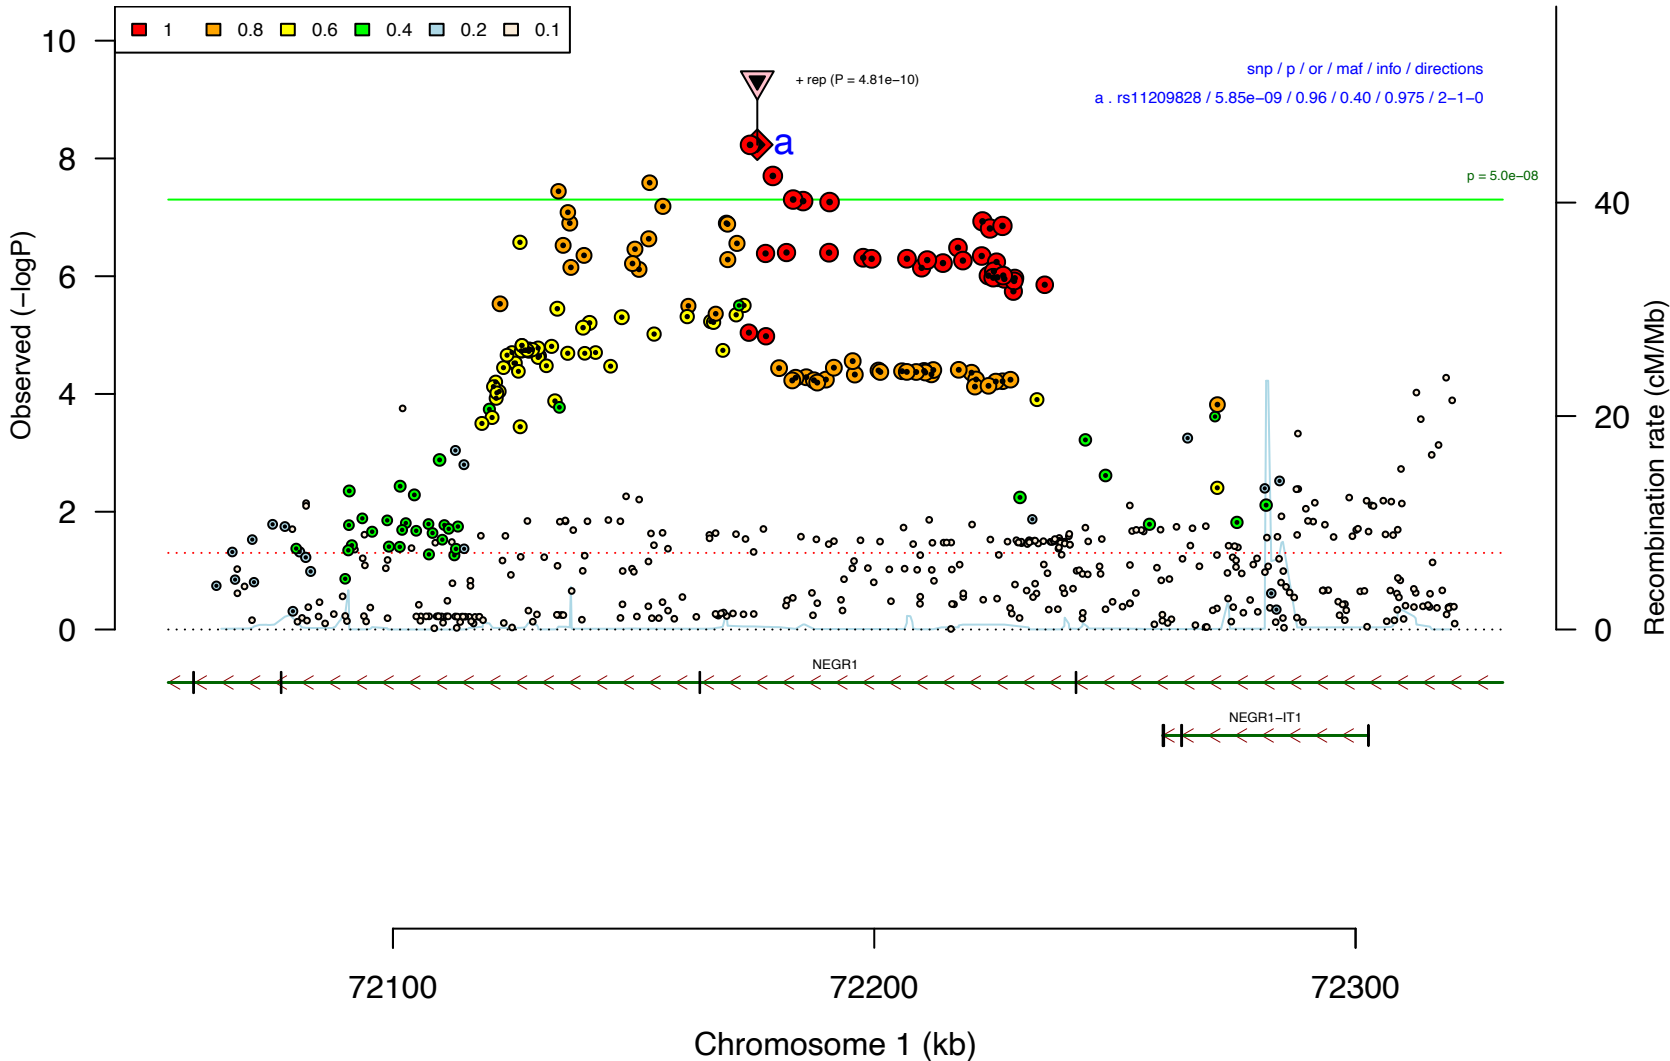



# PGC\_SCZ\_w3\_90\_0418b.125.chr17

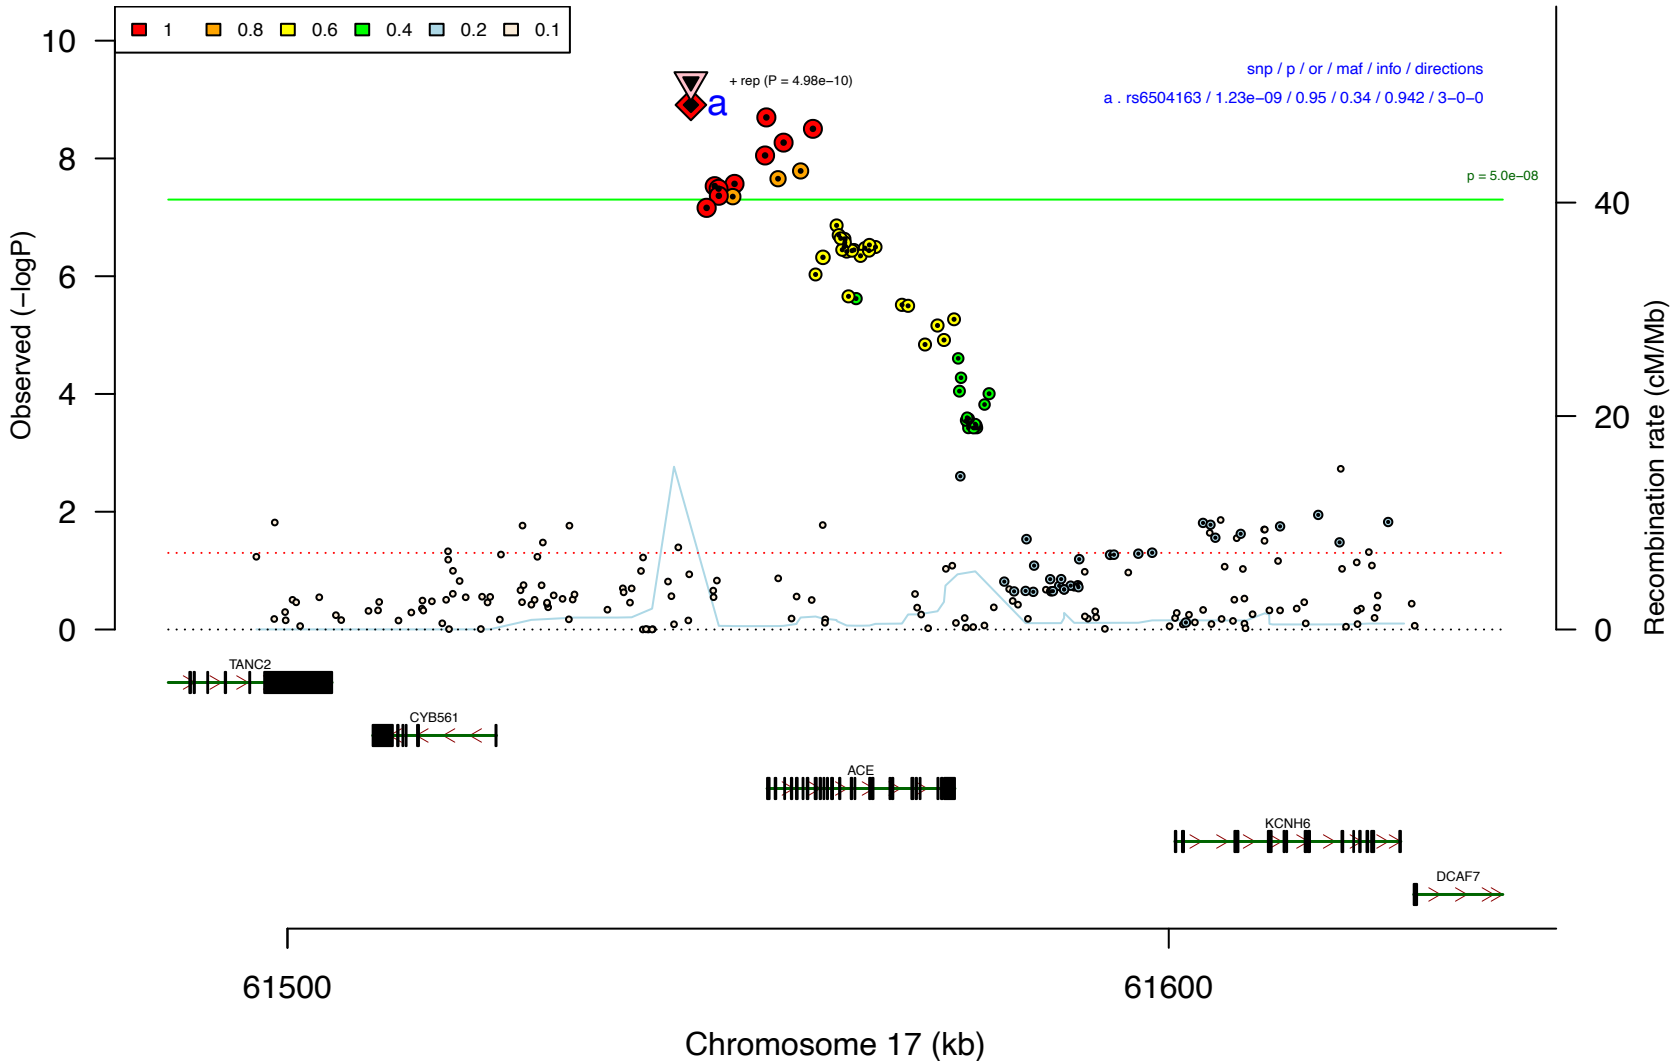

# PGC\_SCZ\_w3\_90\_0418b.126.chr5

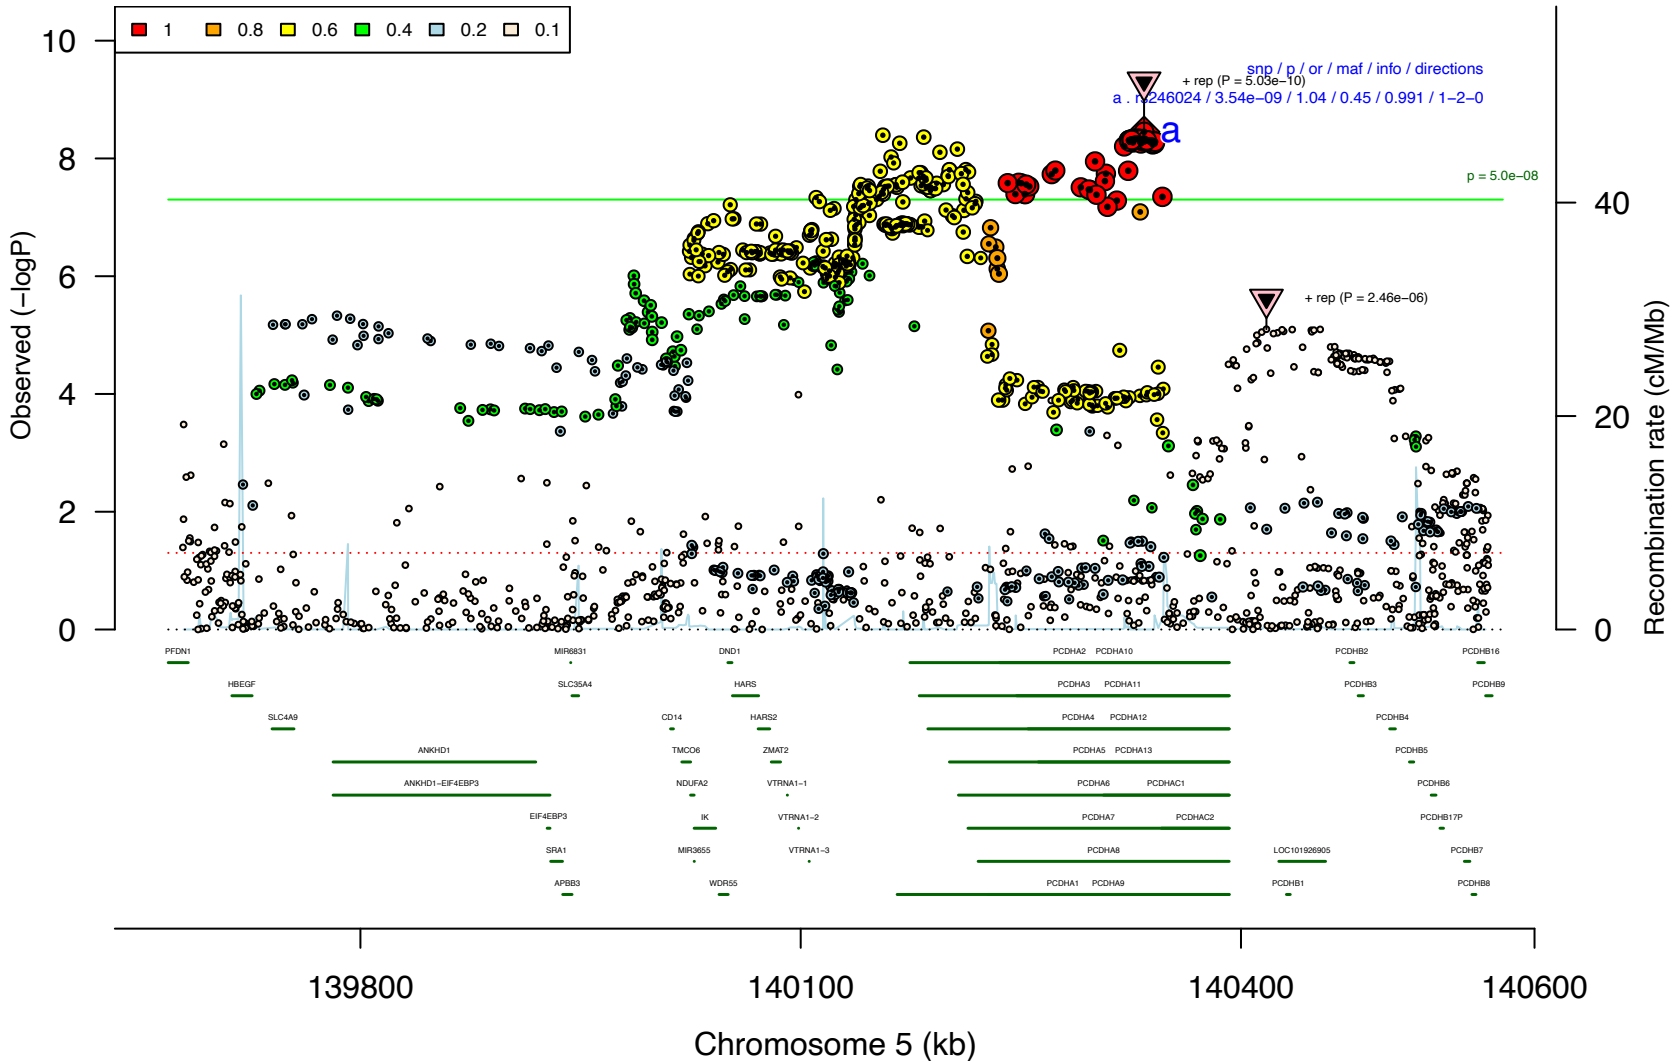

# PGC\_SCZ\_w3\_90\_0418b.127.chr3

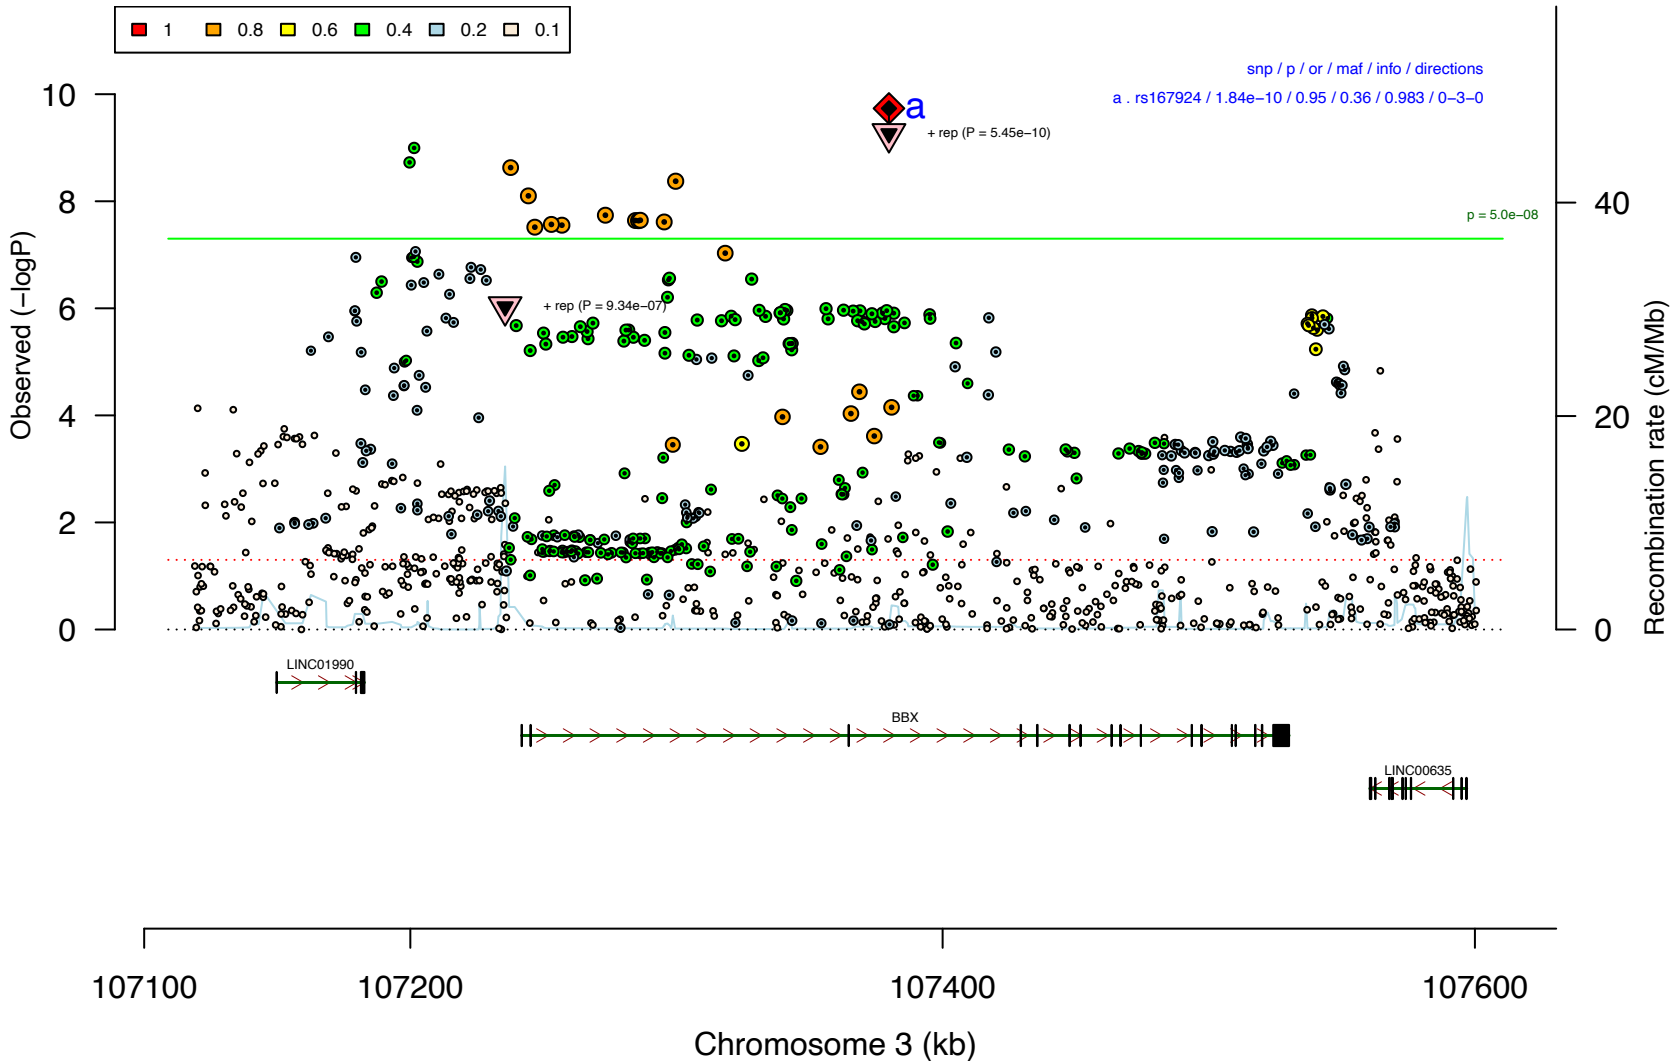

# PGC\_SCZ\_w3\_90\_0418b.128.chr19

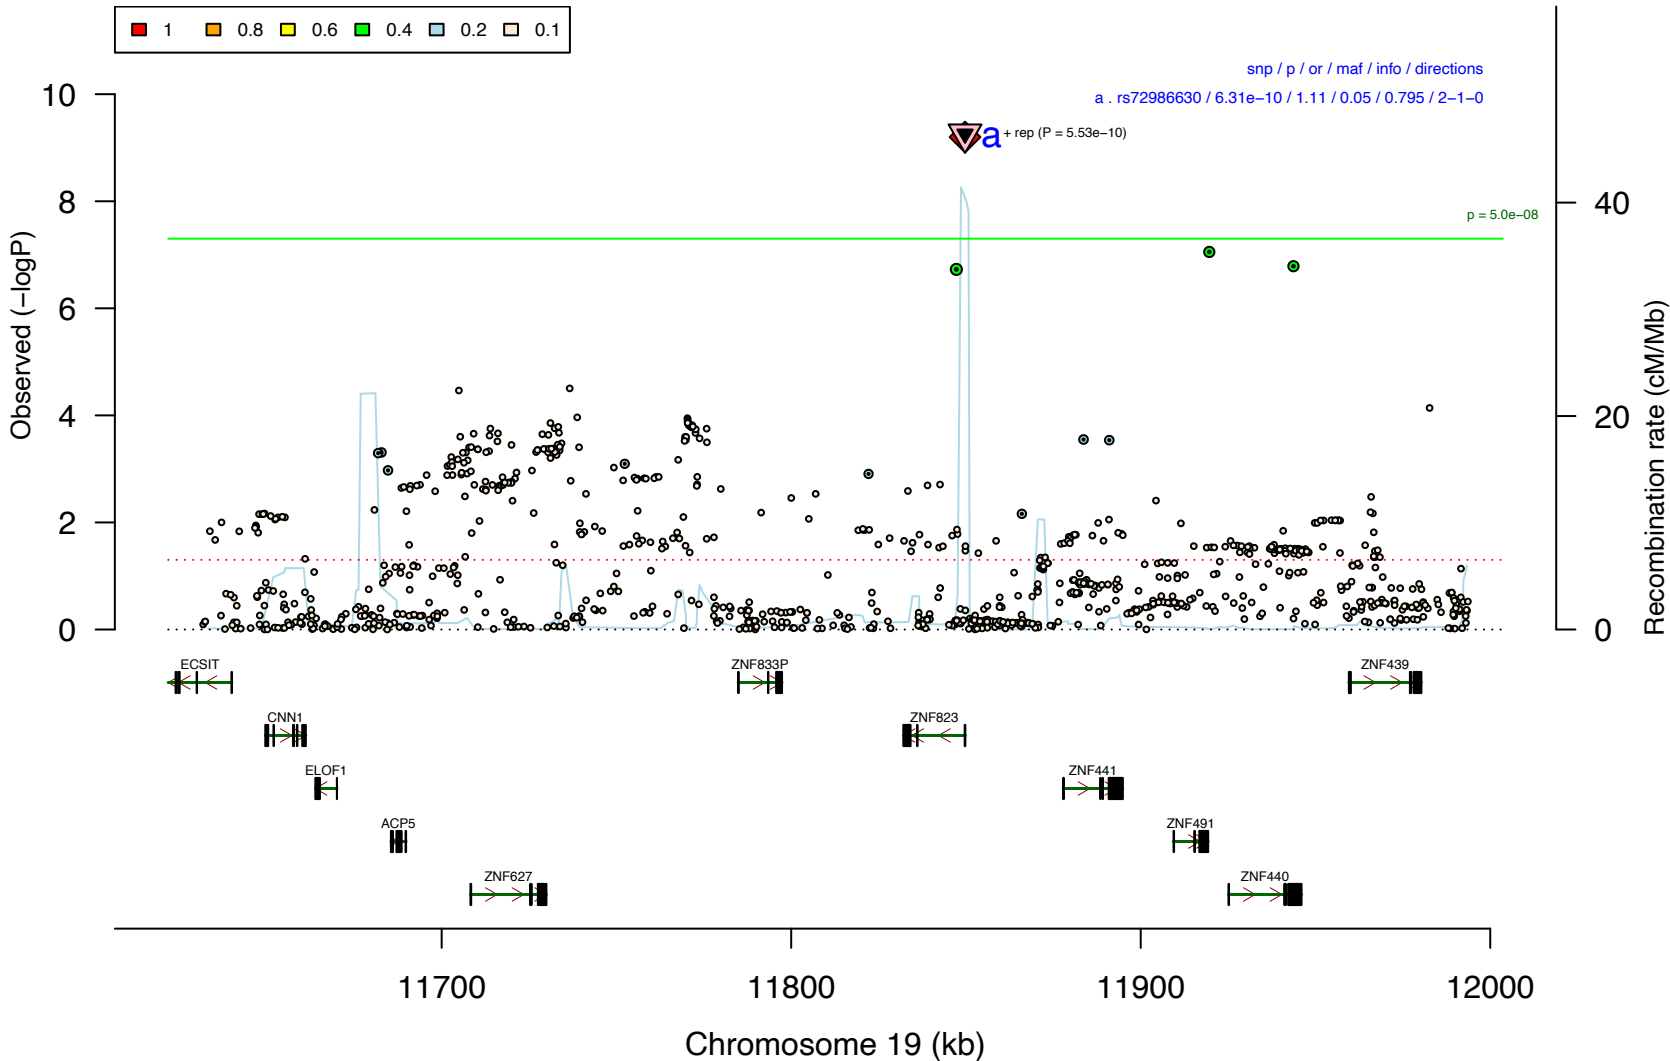

# PGC\_SCZ\_w3\_90\_0418b.129.chr4

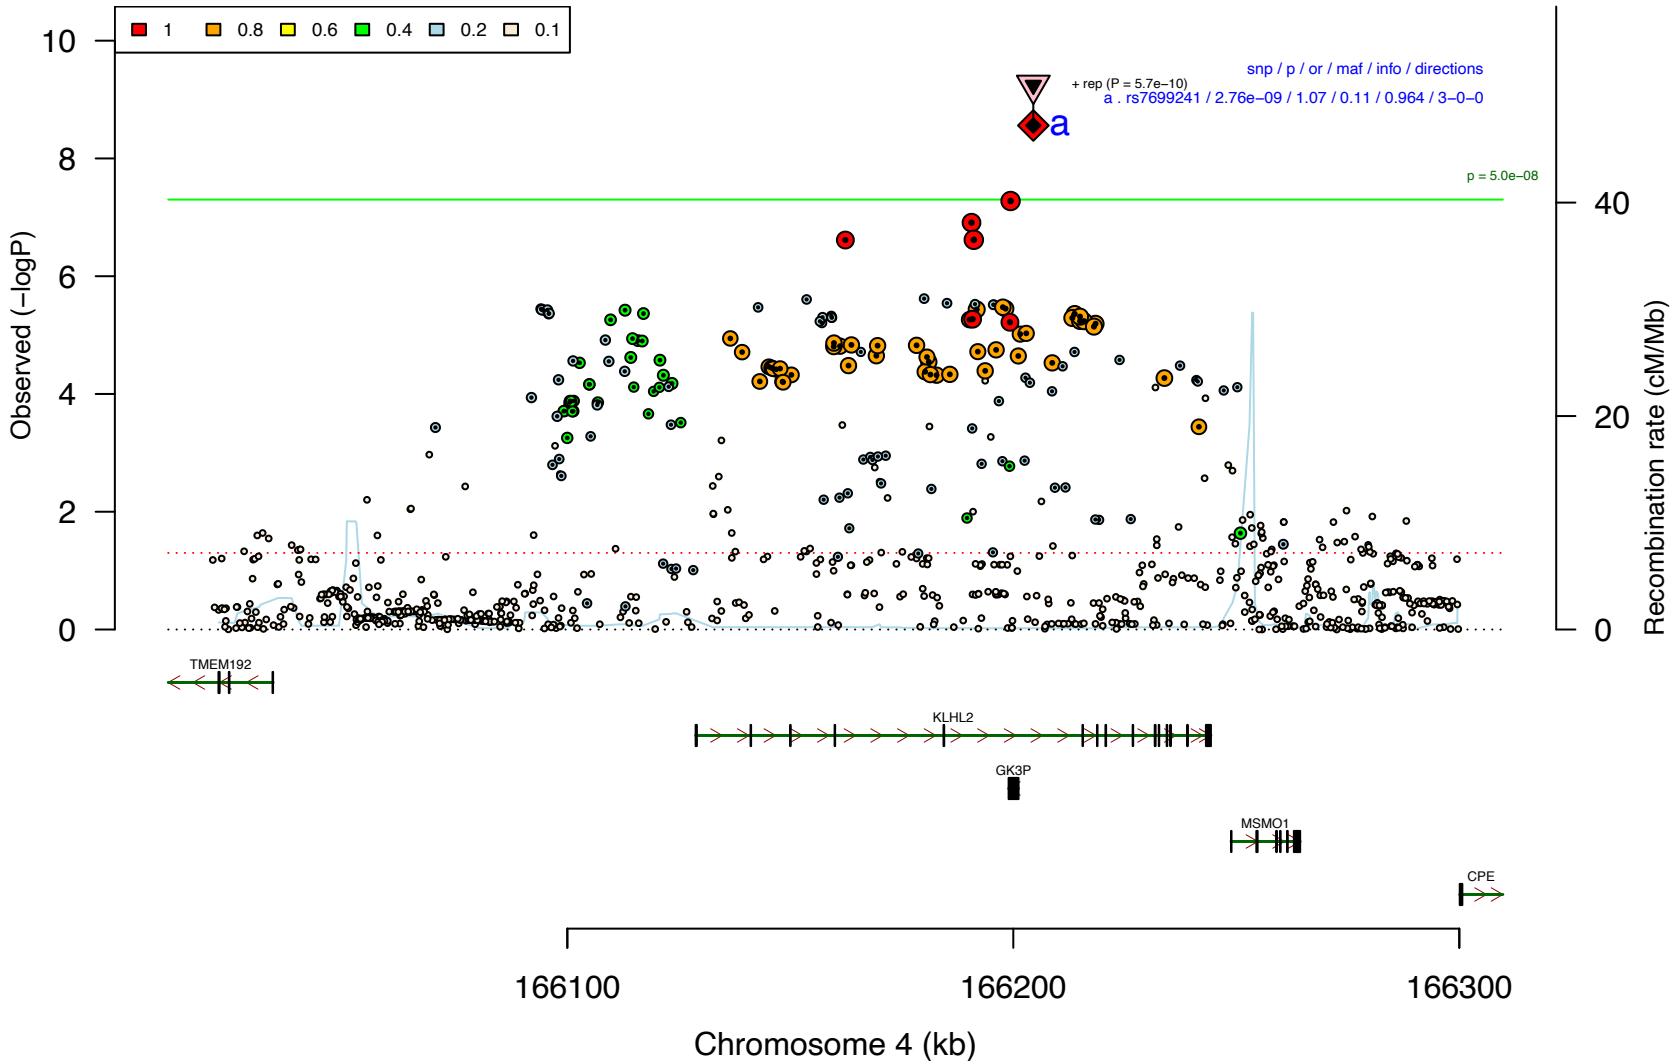

# PGC\_SCZ\_w3\_90\_0418b.130.chr2

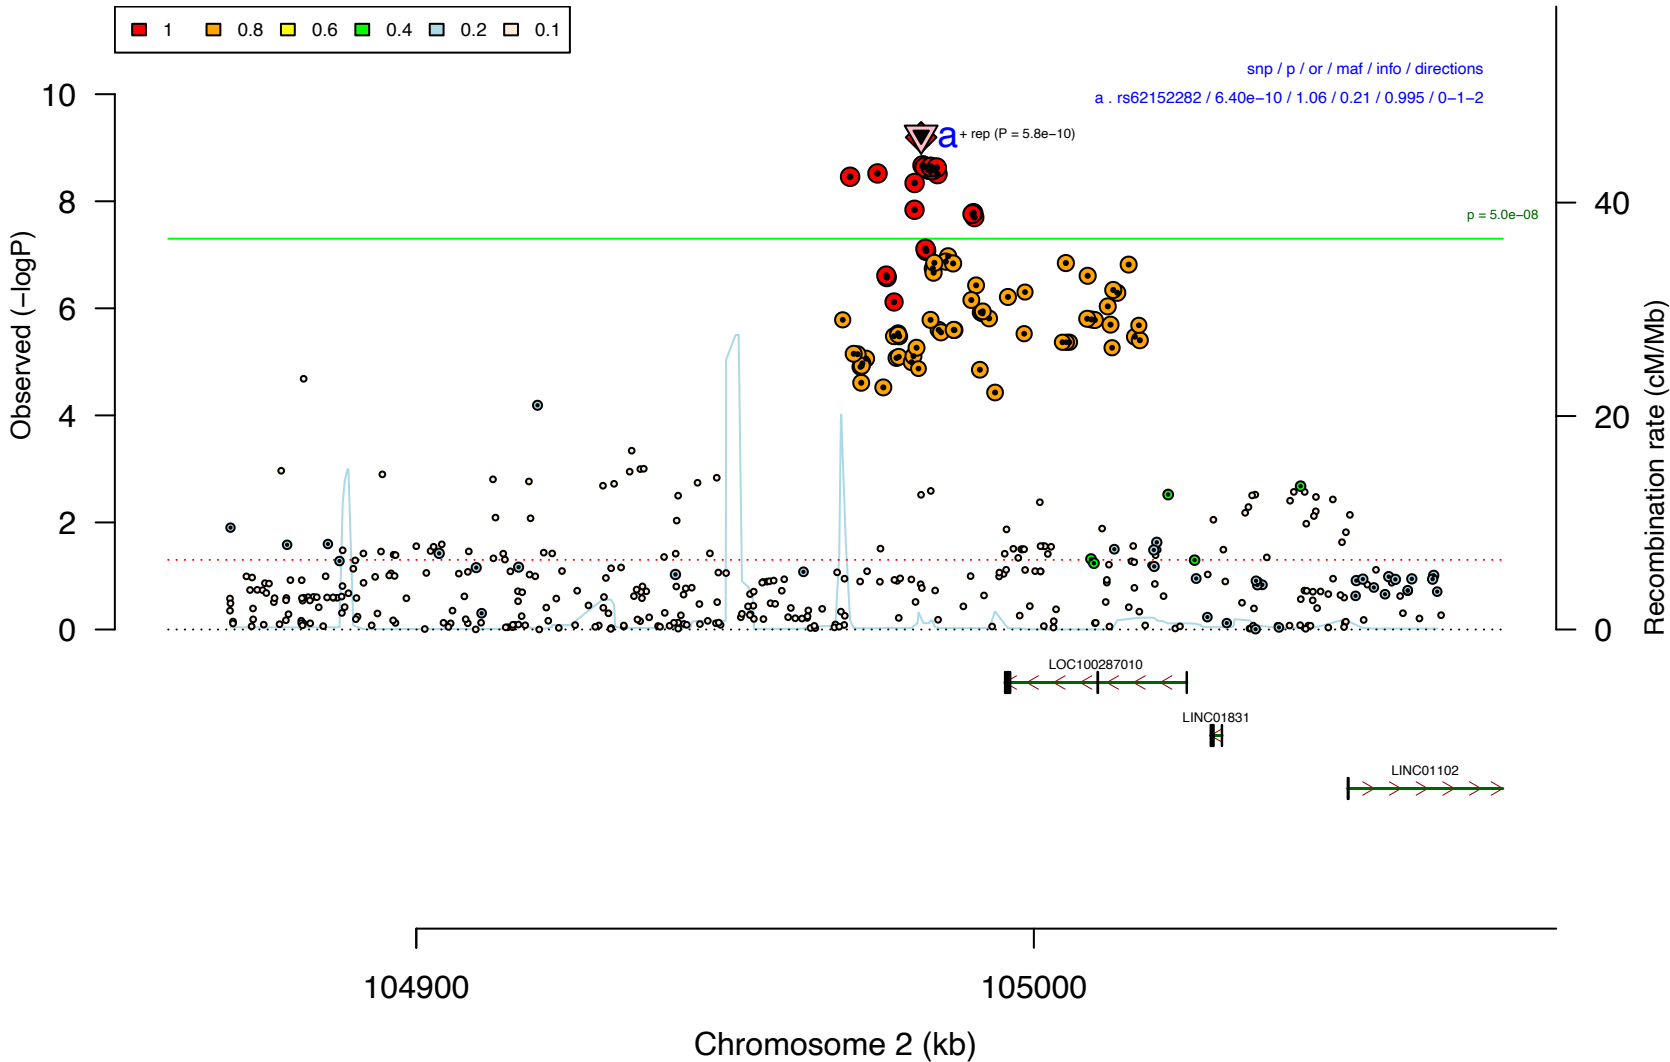

# PGC\_SCZ\_w3\_90\_0418b.131.chr5

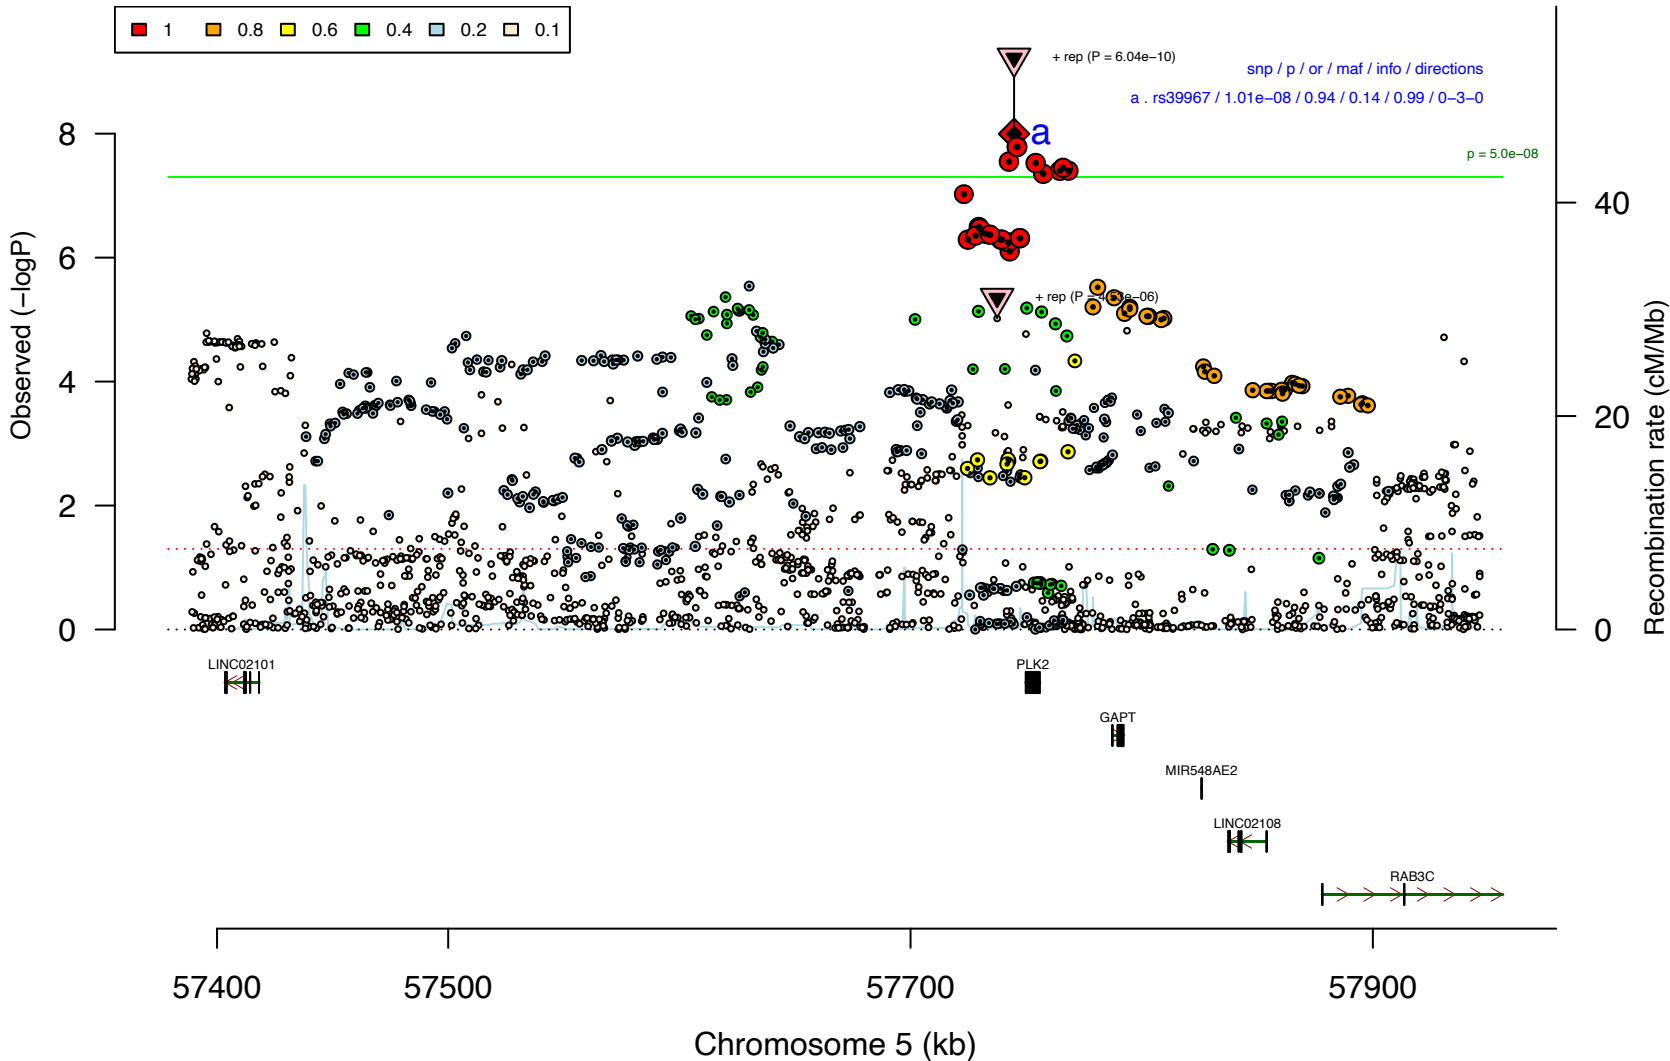

# PGC\_SCZ\_w3\_90\_0418b.132.chr5

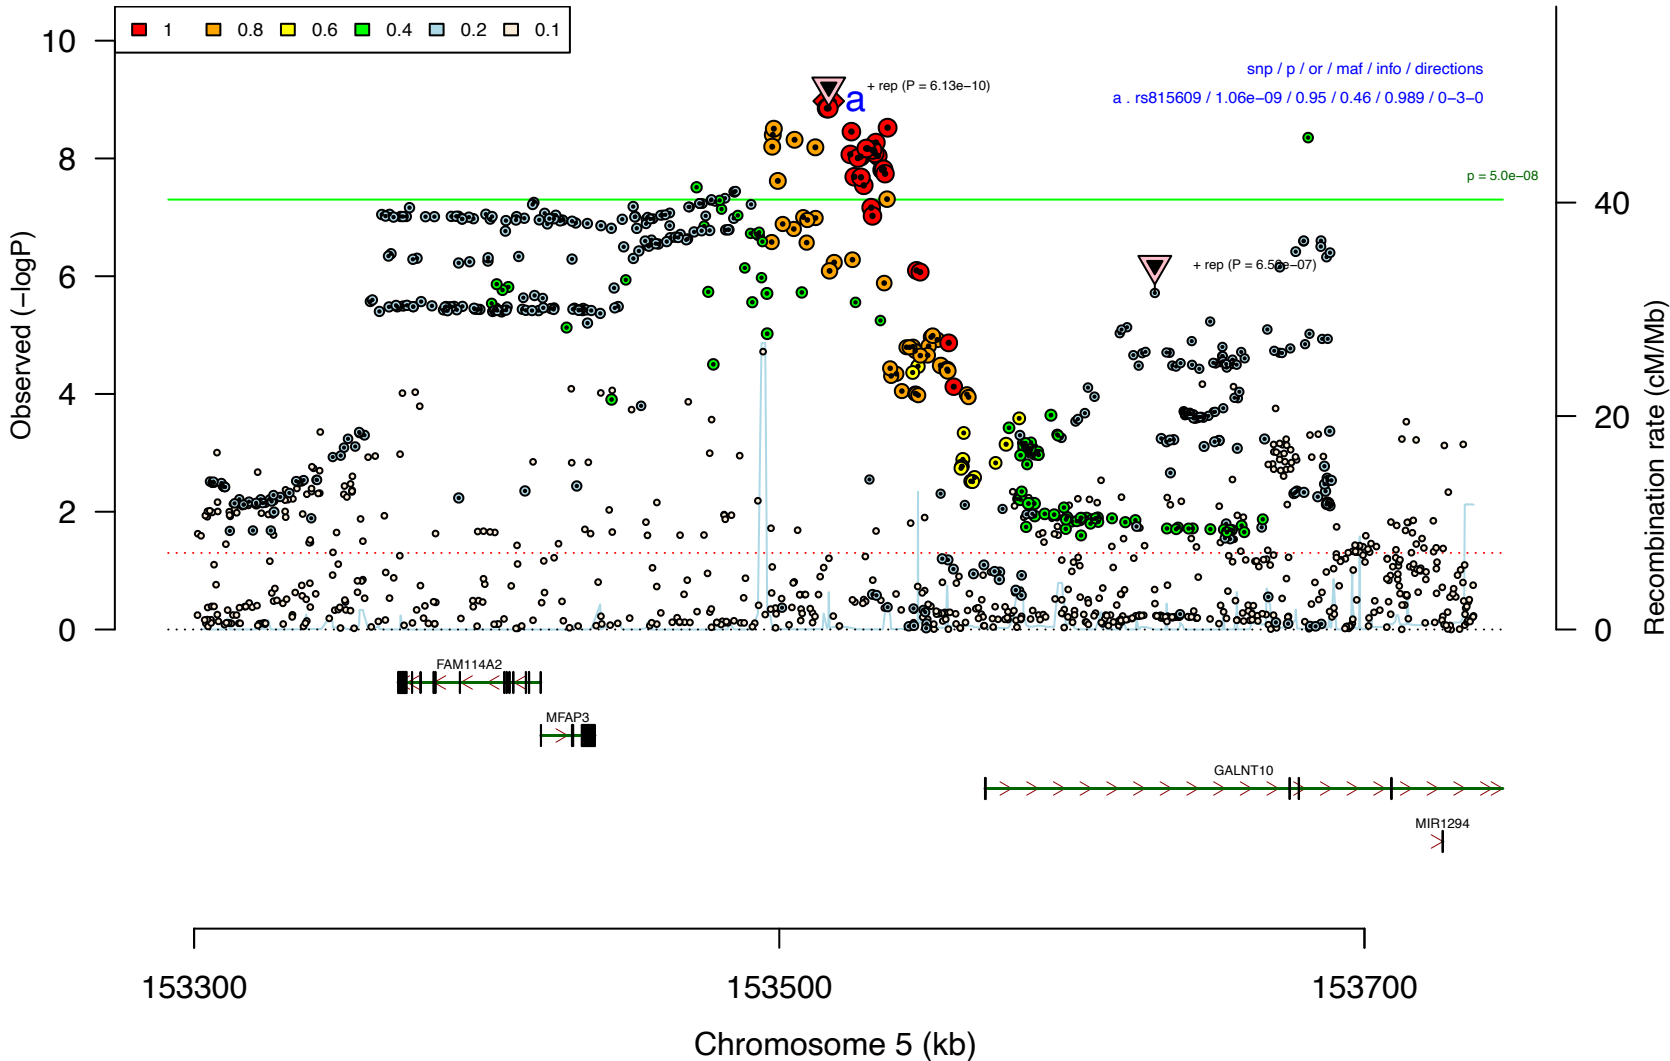



# PGC\_SCZ\_w3\_90\_0418b.133.chr10

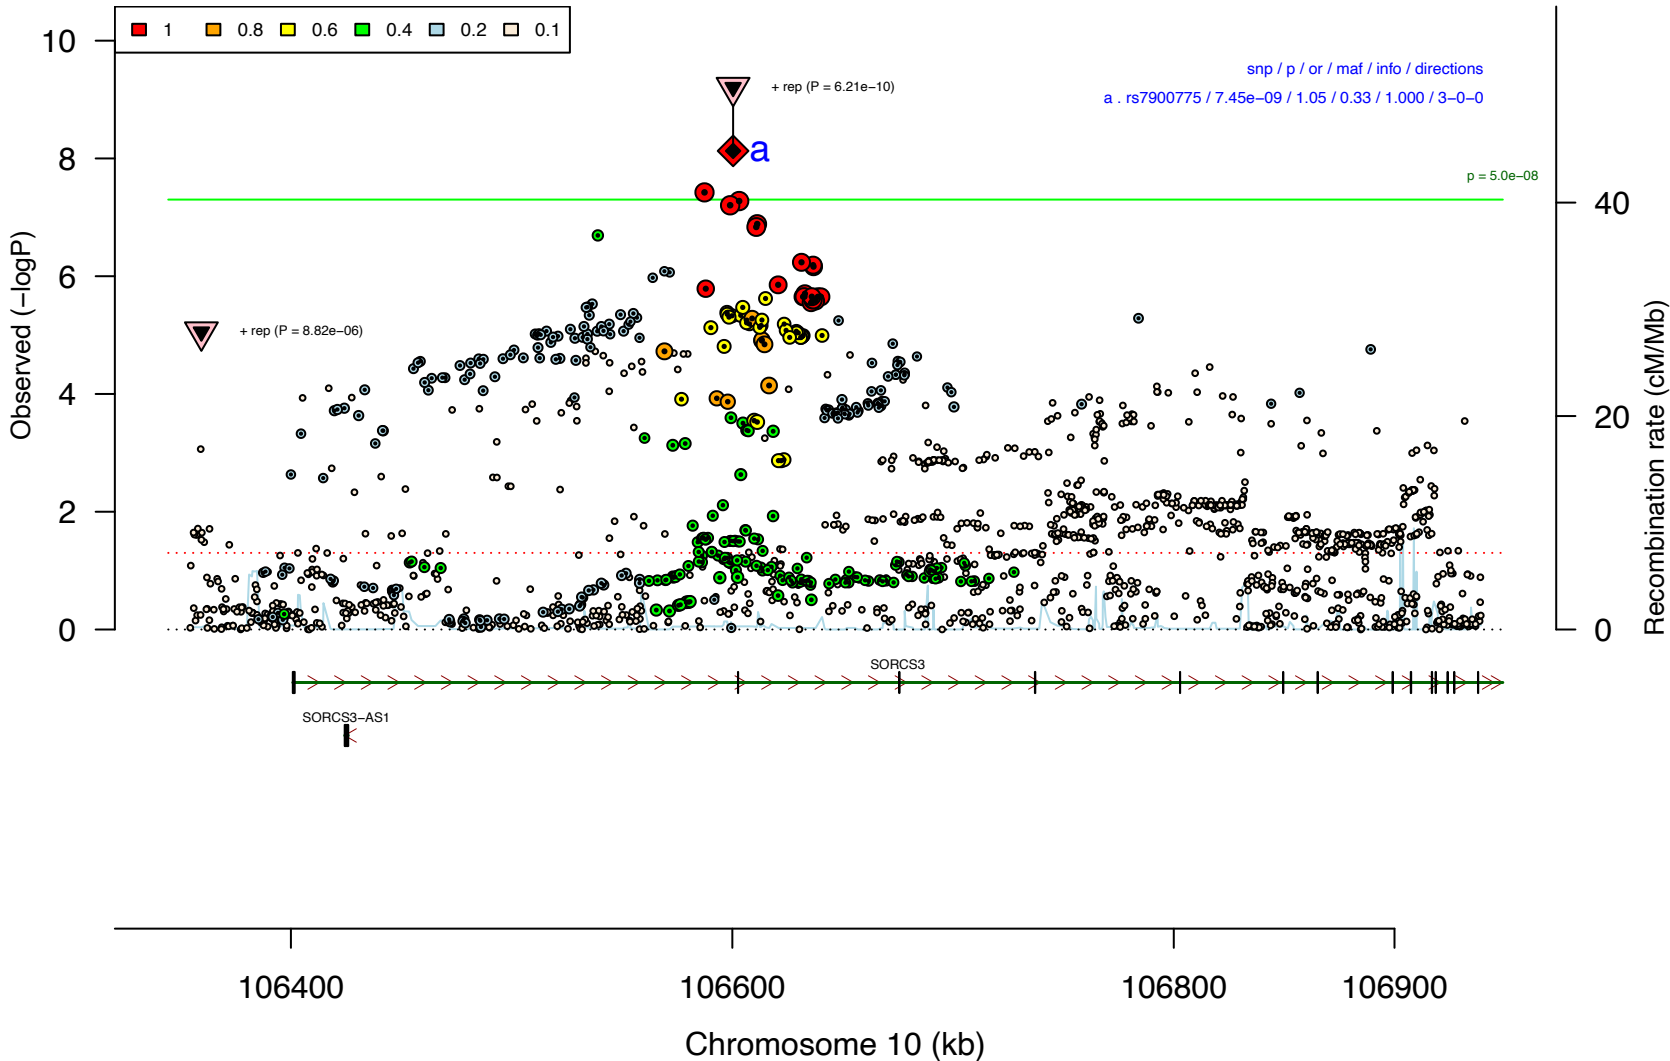

# PGC\_SCZ\_w3\_90\_0418b.134.chr1

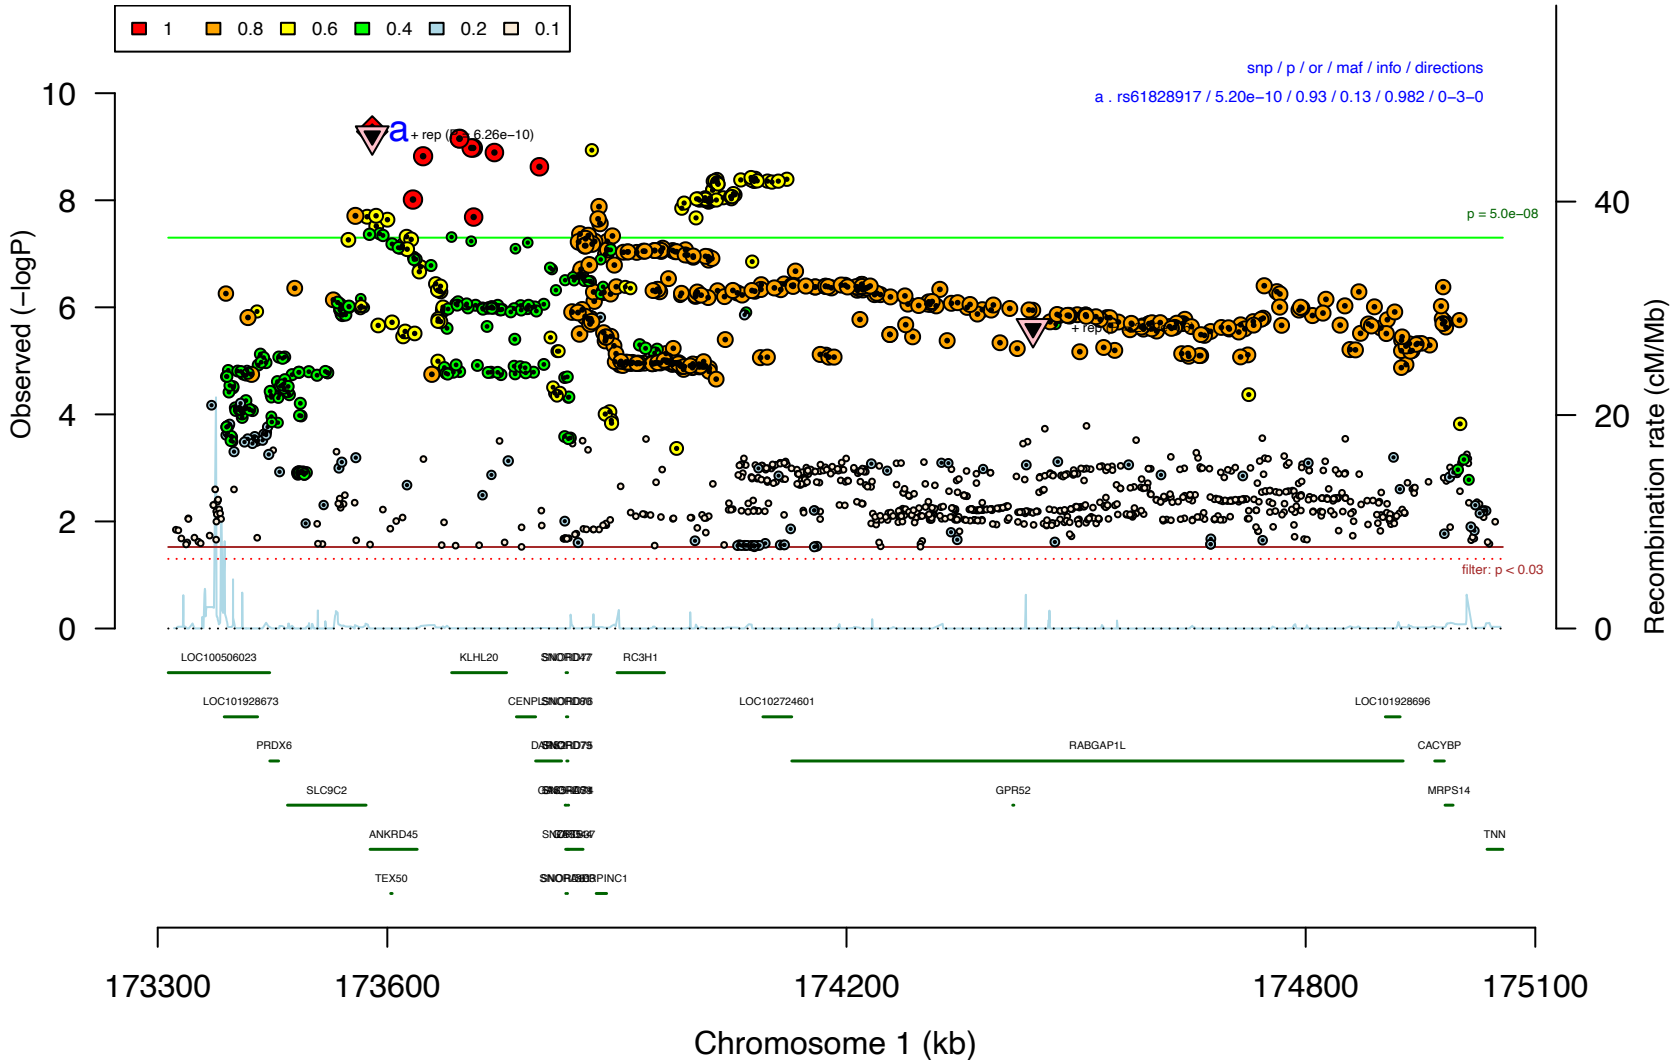

# PGC\_SCZ\_w3\_90\_0418b.135.chr7

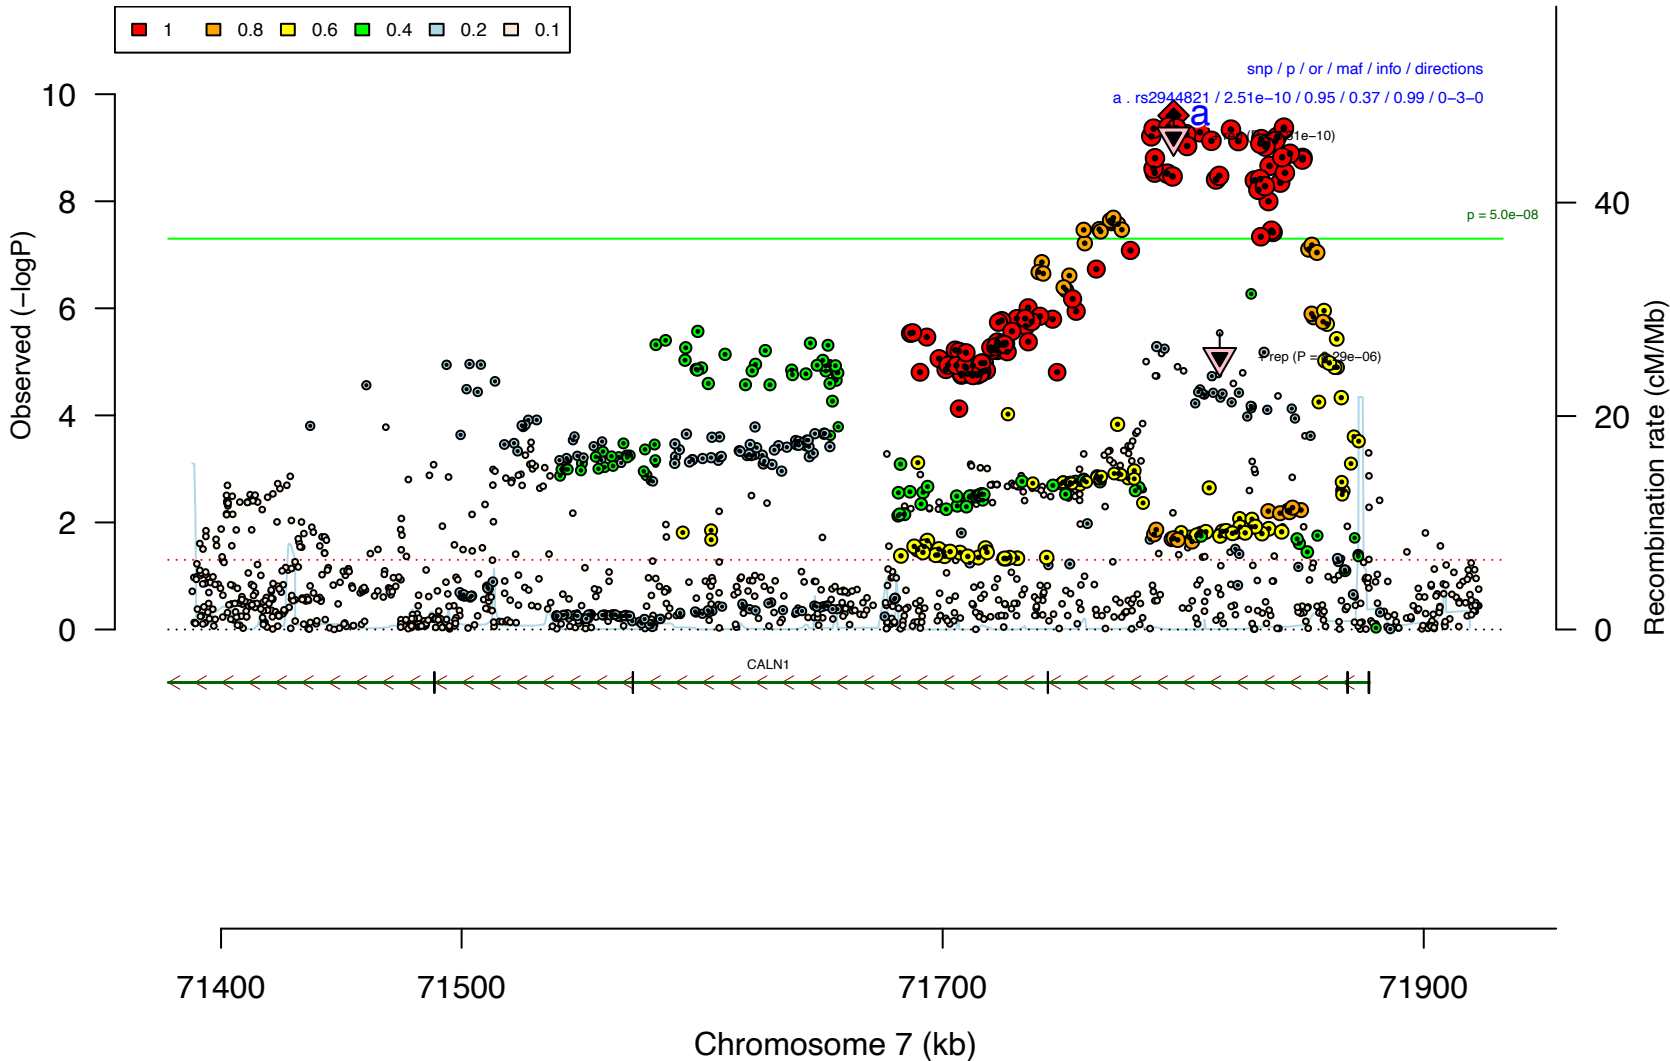

# PGC\_SCZ\_w3\_90\_0418b.136.chr7

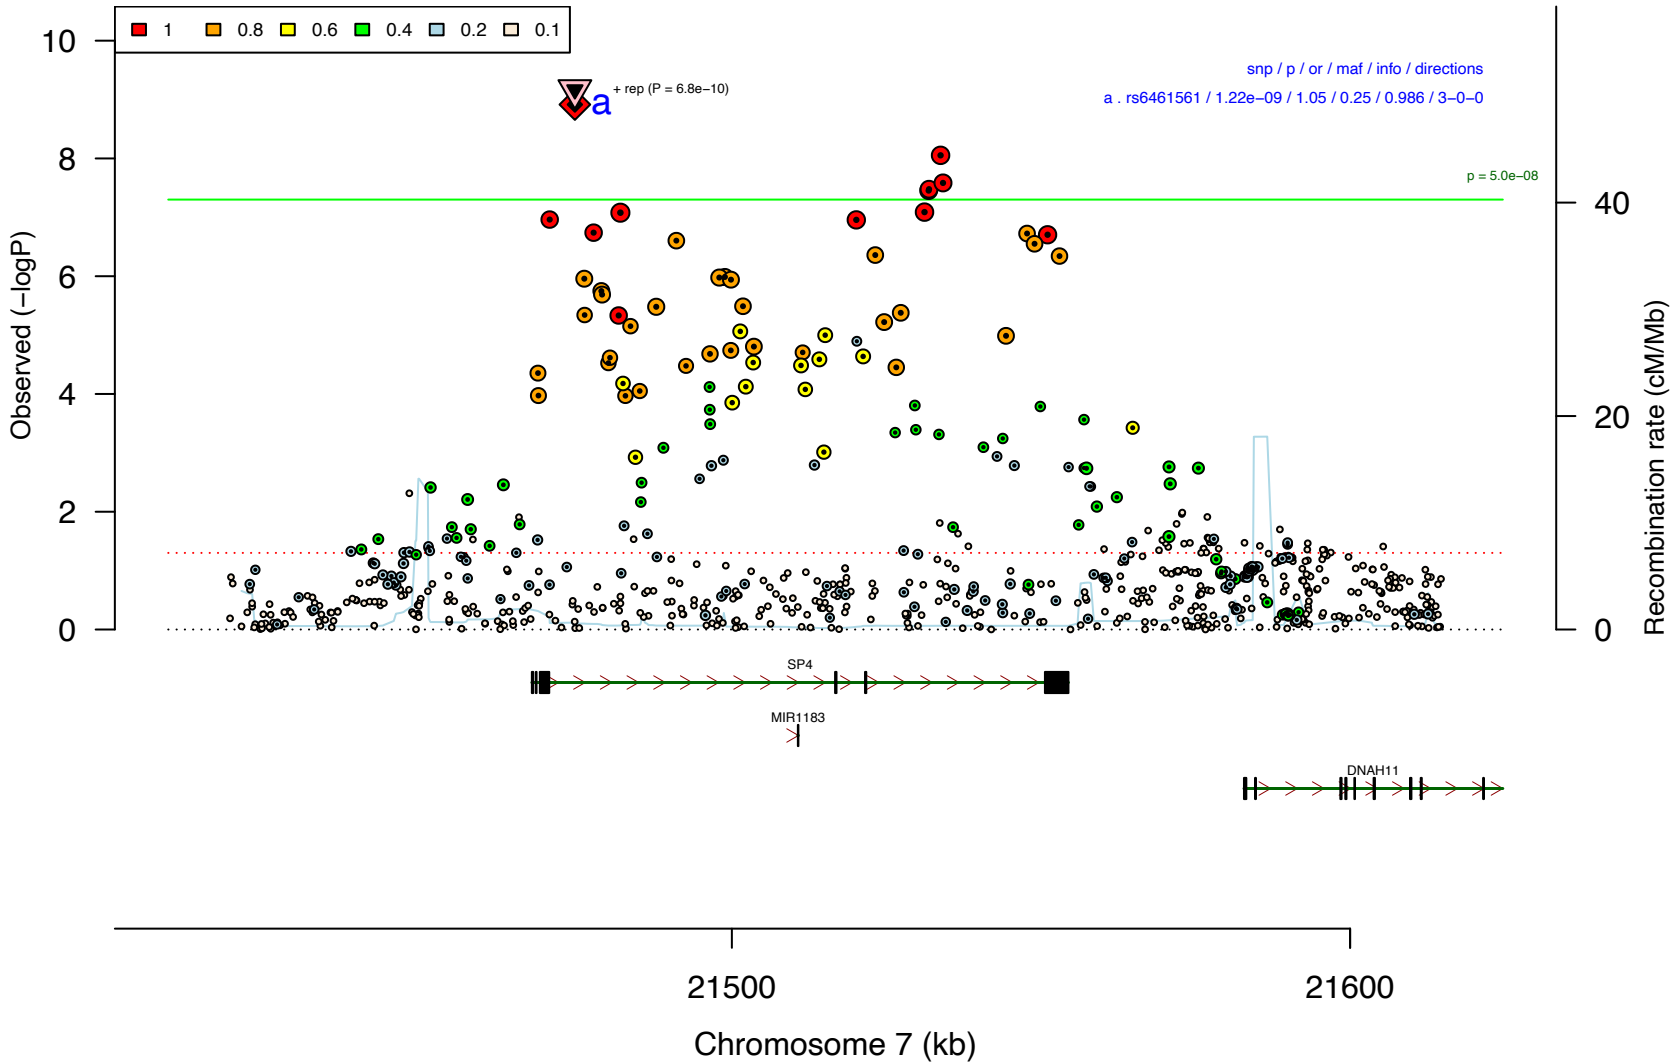

# PGC\_SCZ\_w3\_90\_0418b.137.chr10

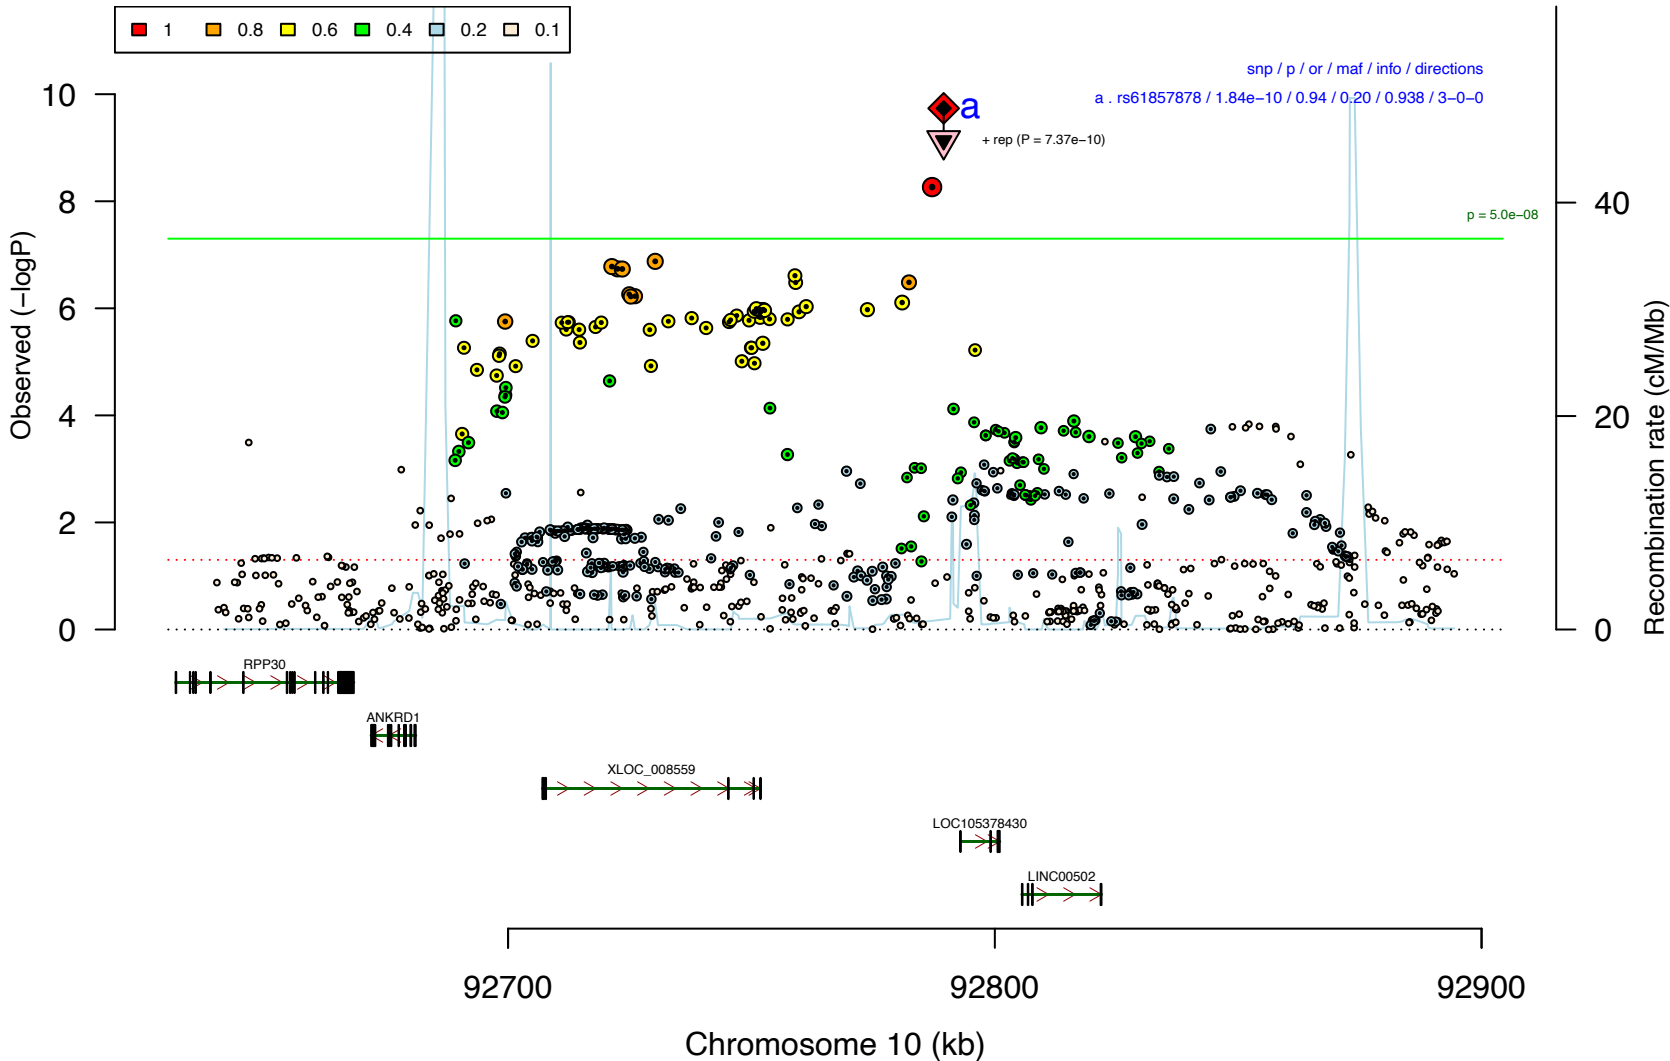

# PGC\_SCZ\_w3\_90\_0418b.138.chr7

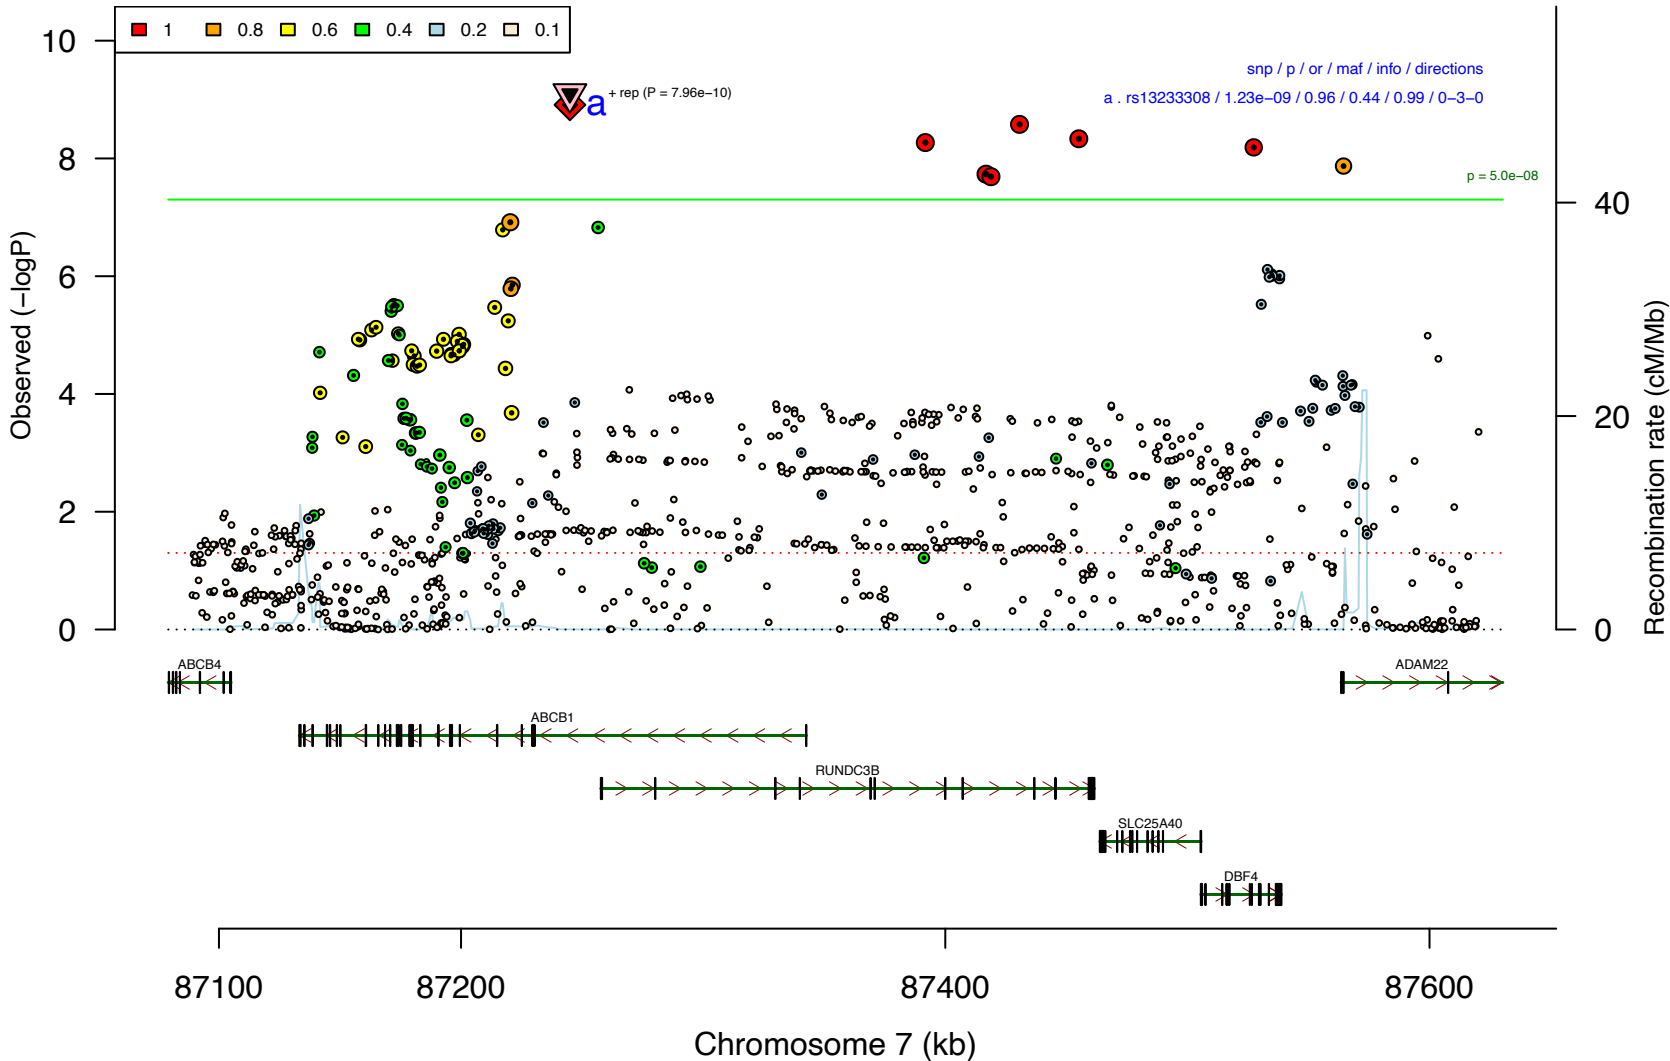

# PGC\_SCZ\_w3\_90\_0418b.139.chr21

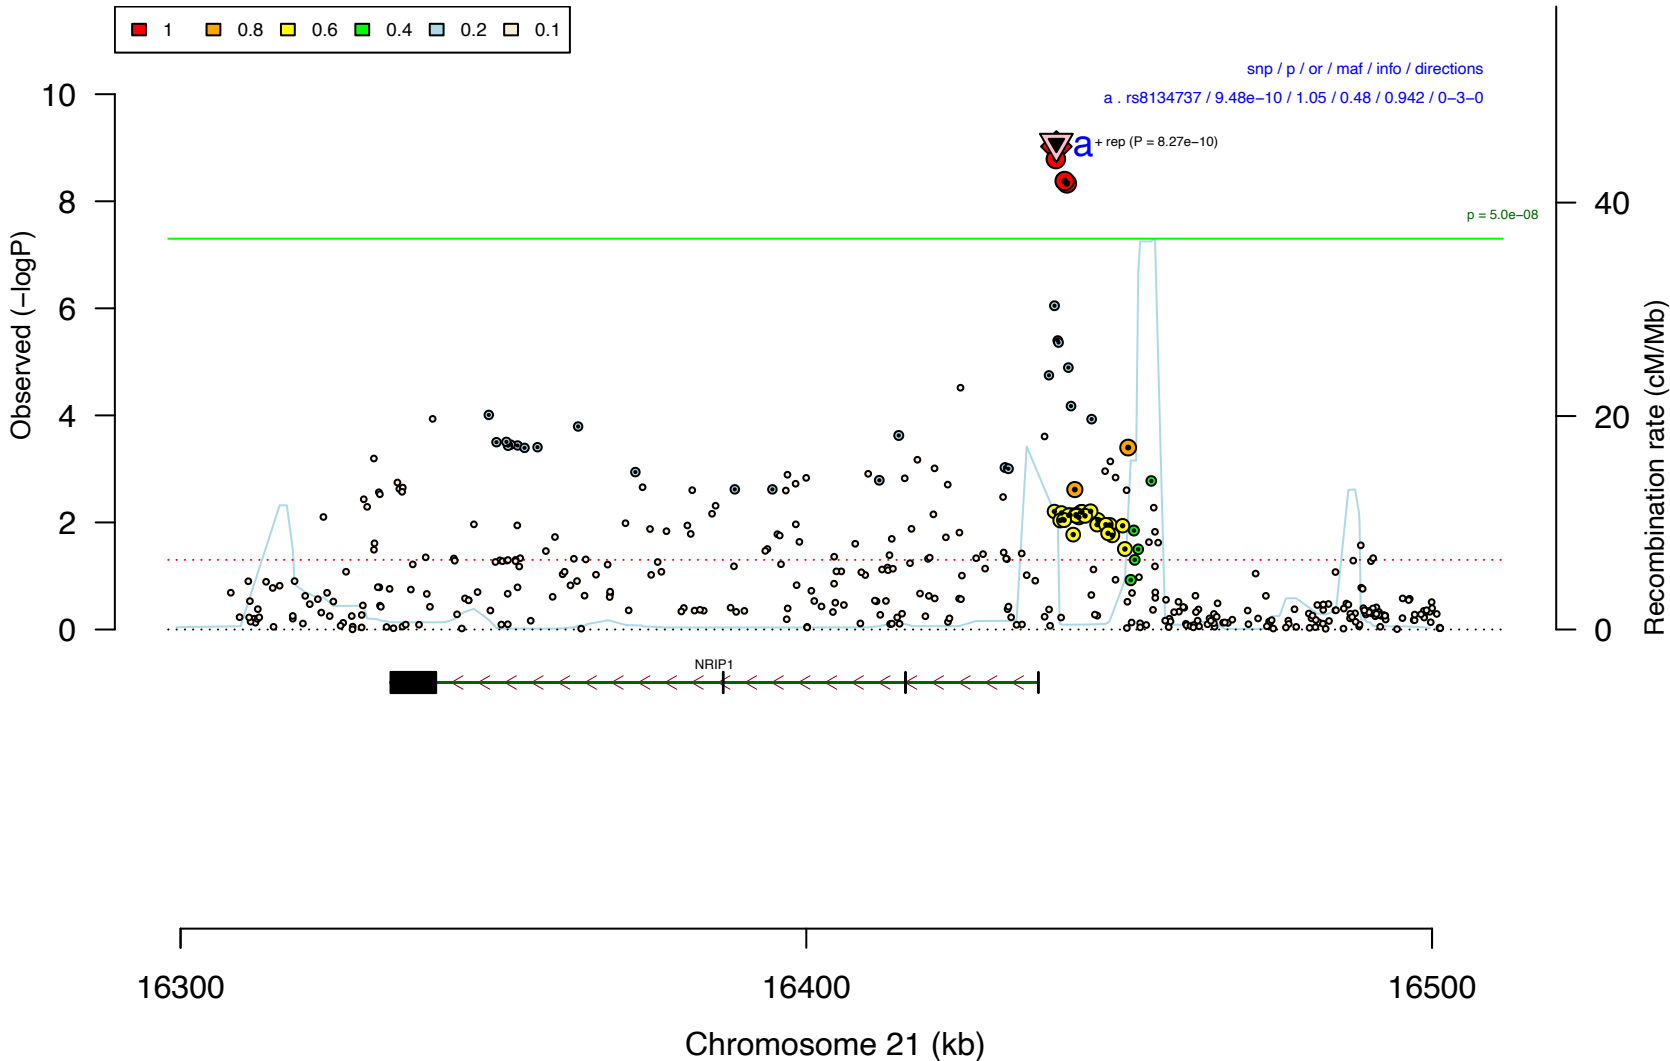

# PGC\_SCZ\_w3\_90\_0418b.140.chr12

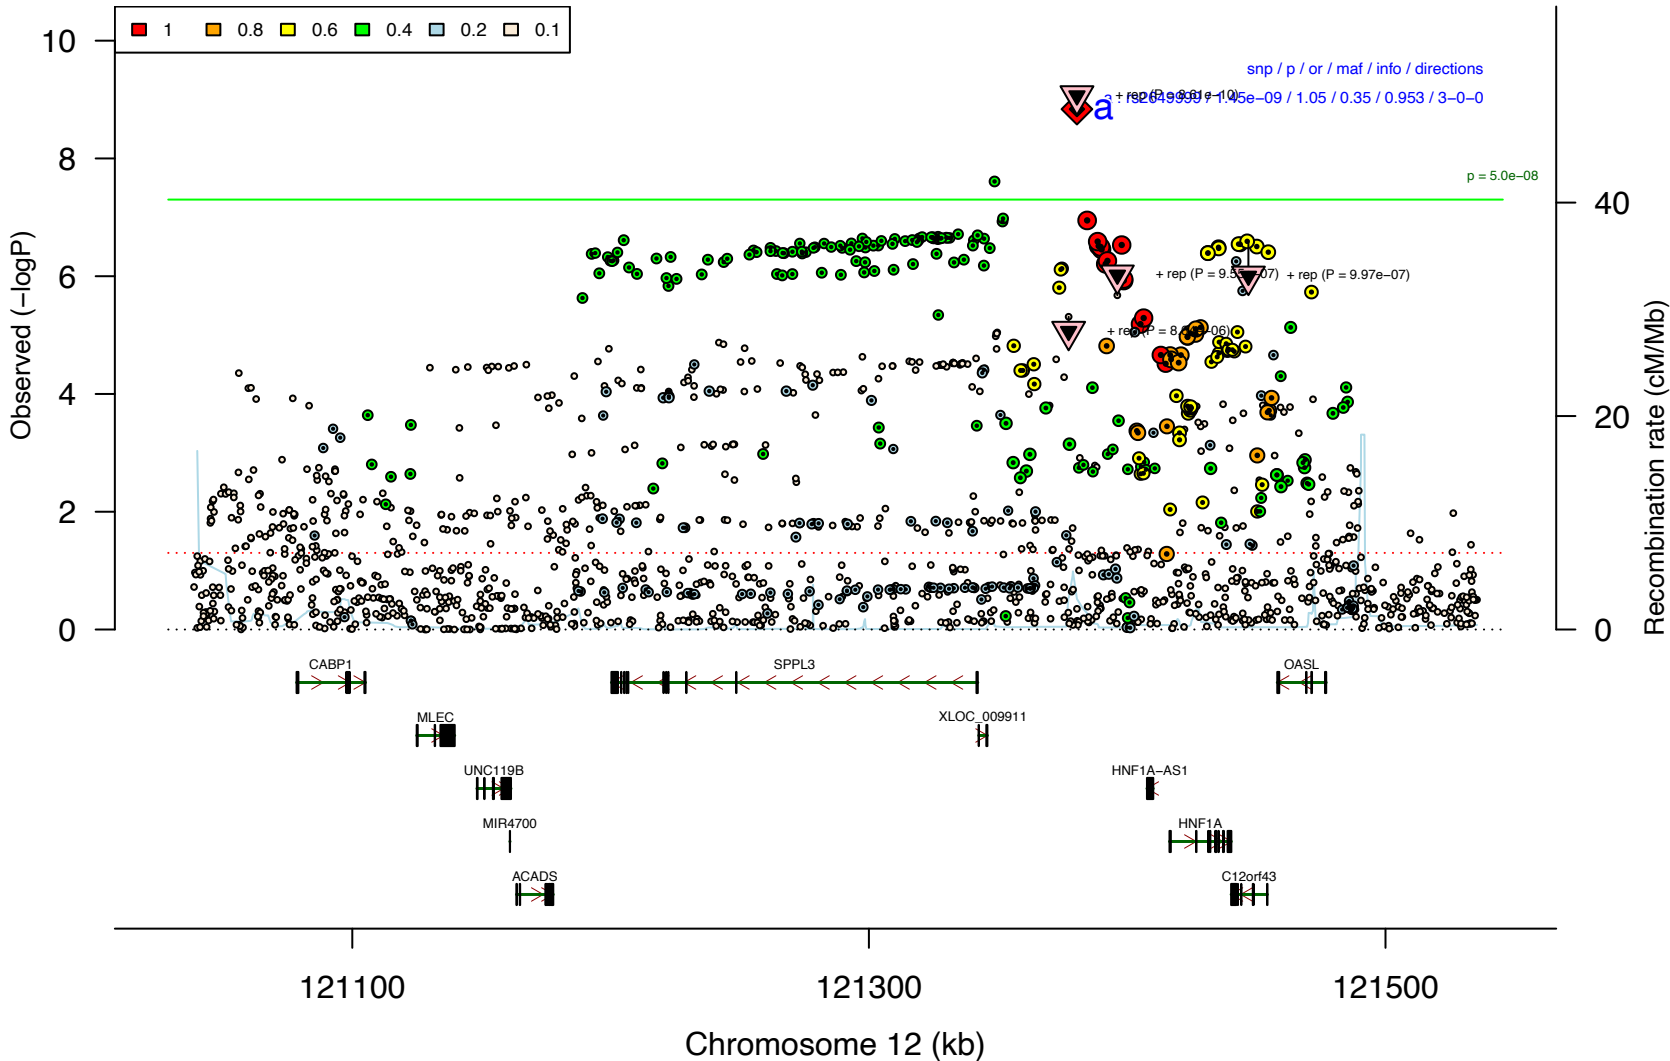



# PGC\_SCZ\_w3\_90\_0418b.141.chr16

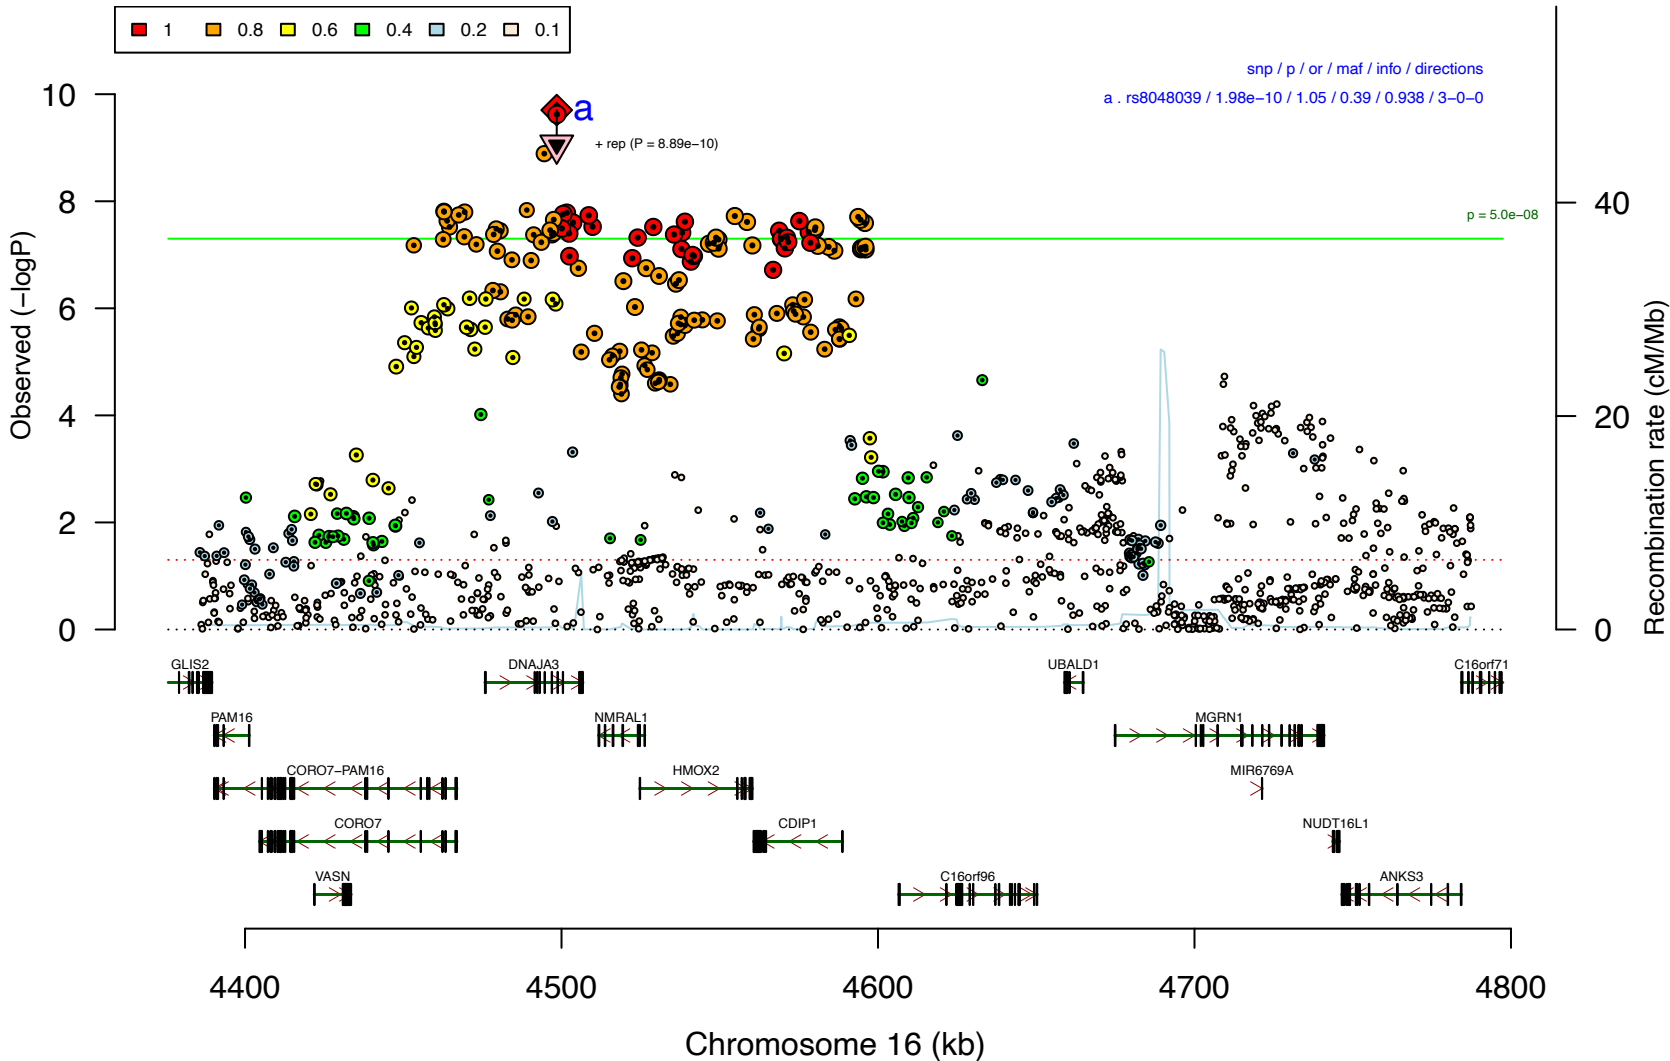

# PGC\_SCZ\_w3\_90\_0418b.142.chr14

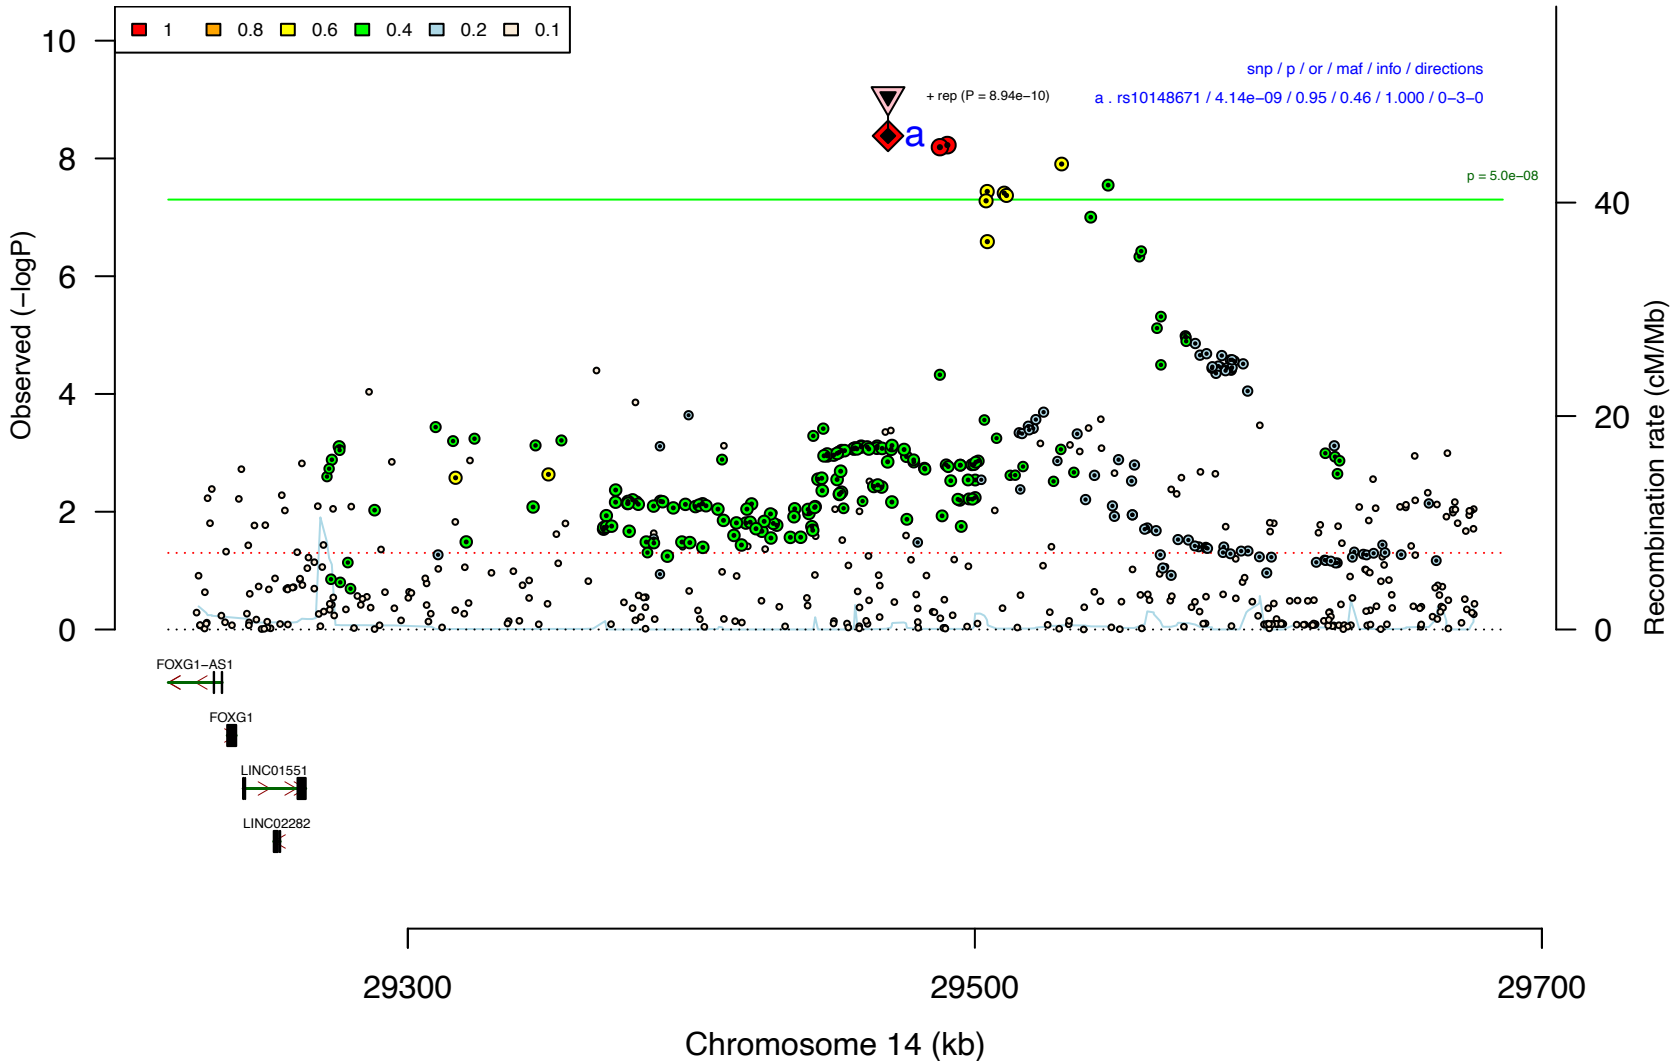

# PGC\_SCZ\_w3\_90\_0418b.143.chr4

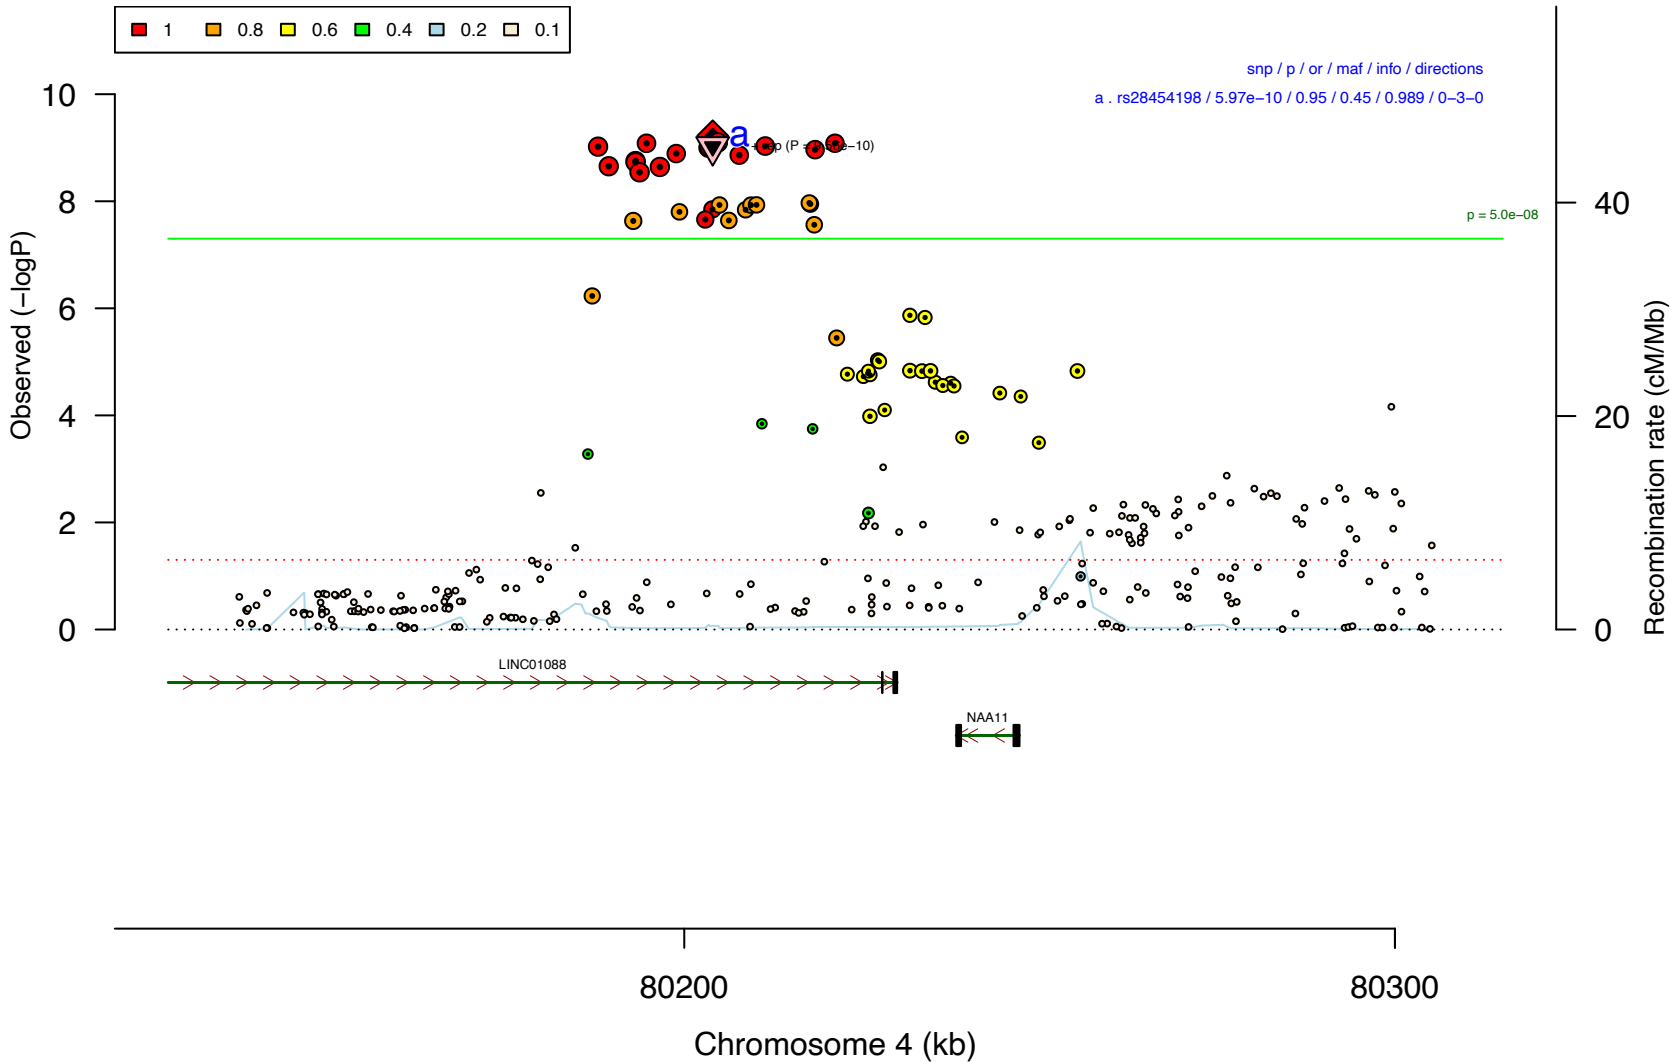

# PGC\_SCZ\_w3\_90\_0418b.144.chr13

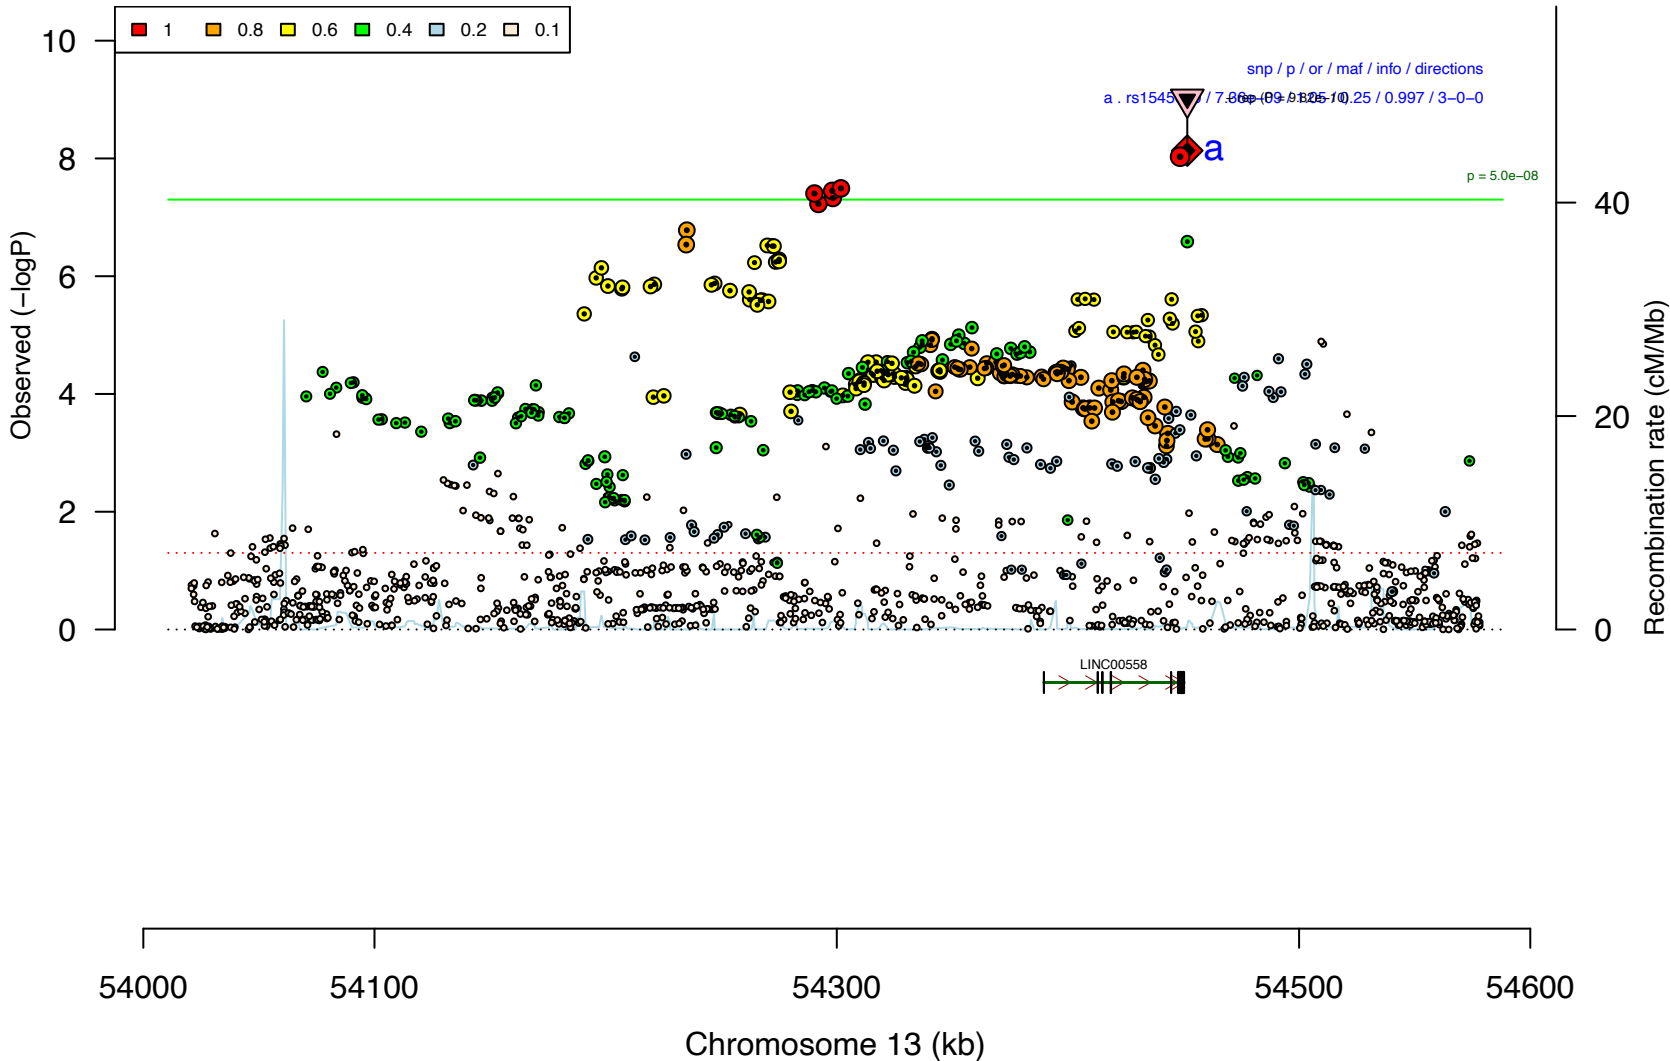

# PGC\_SCZ\_w3\_90\_0418b.145.chr1

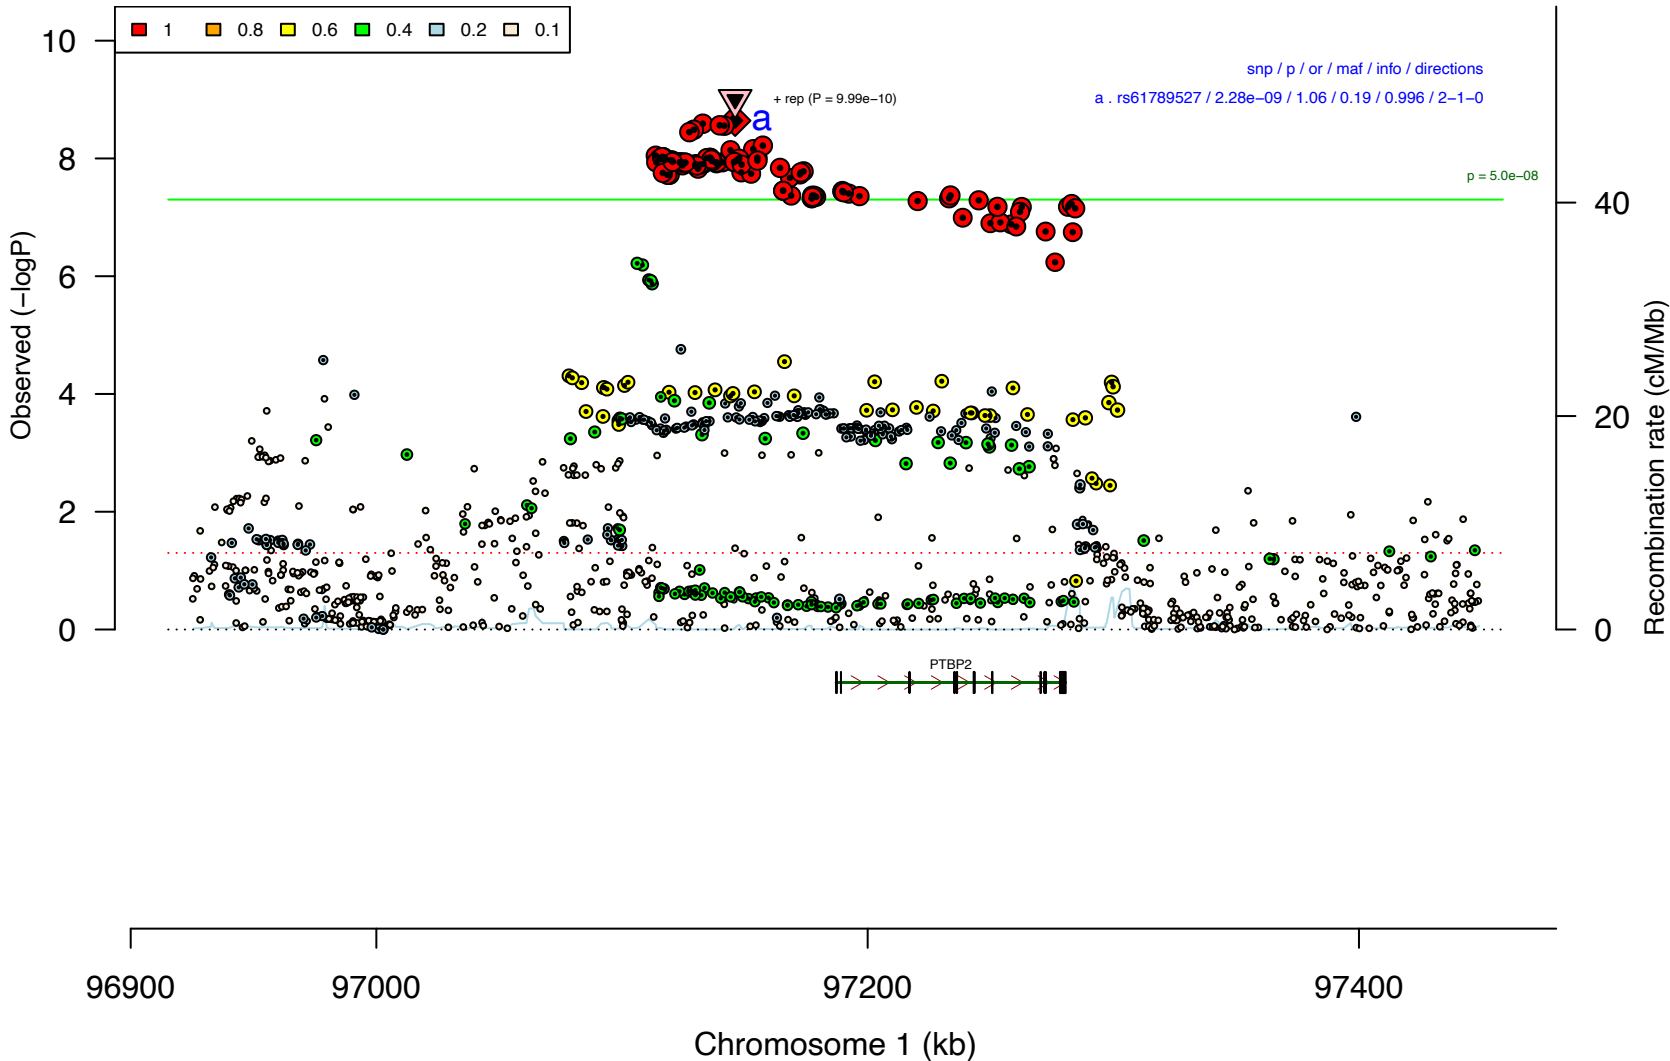

# PGC\_SCZ\_w3\_90\_0418b.146.chr5

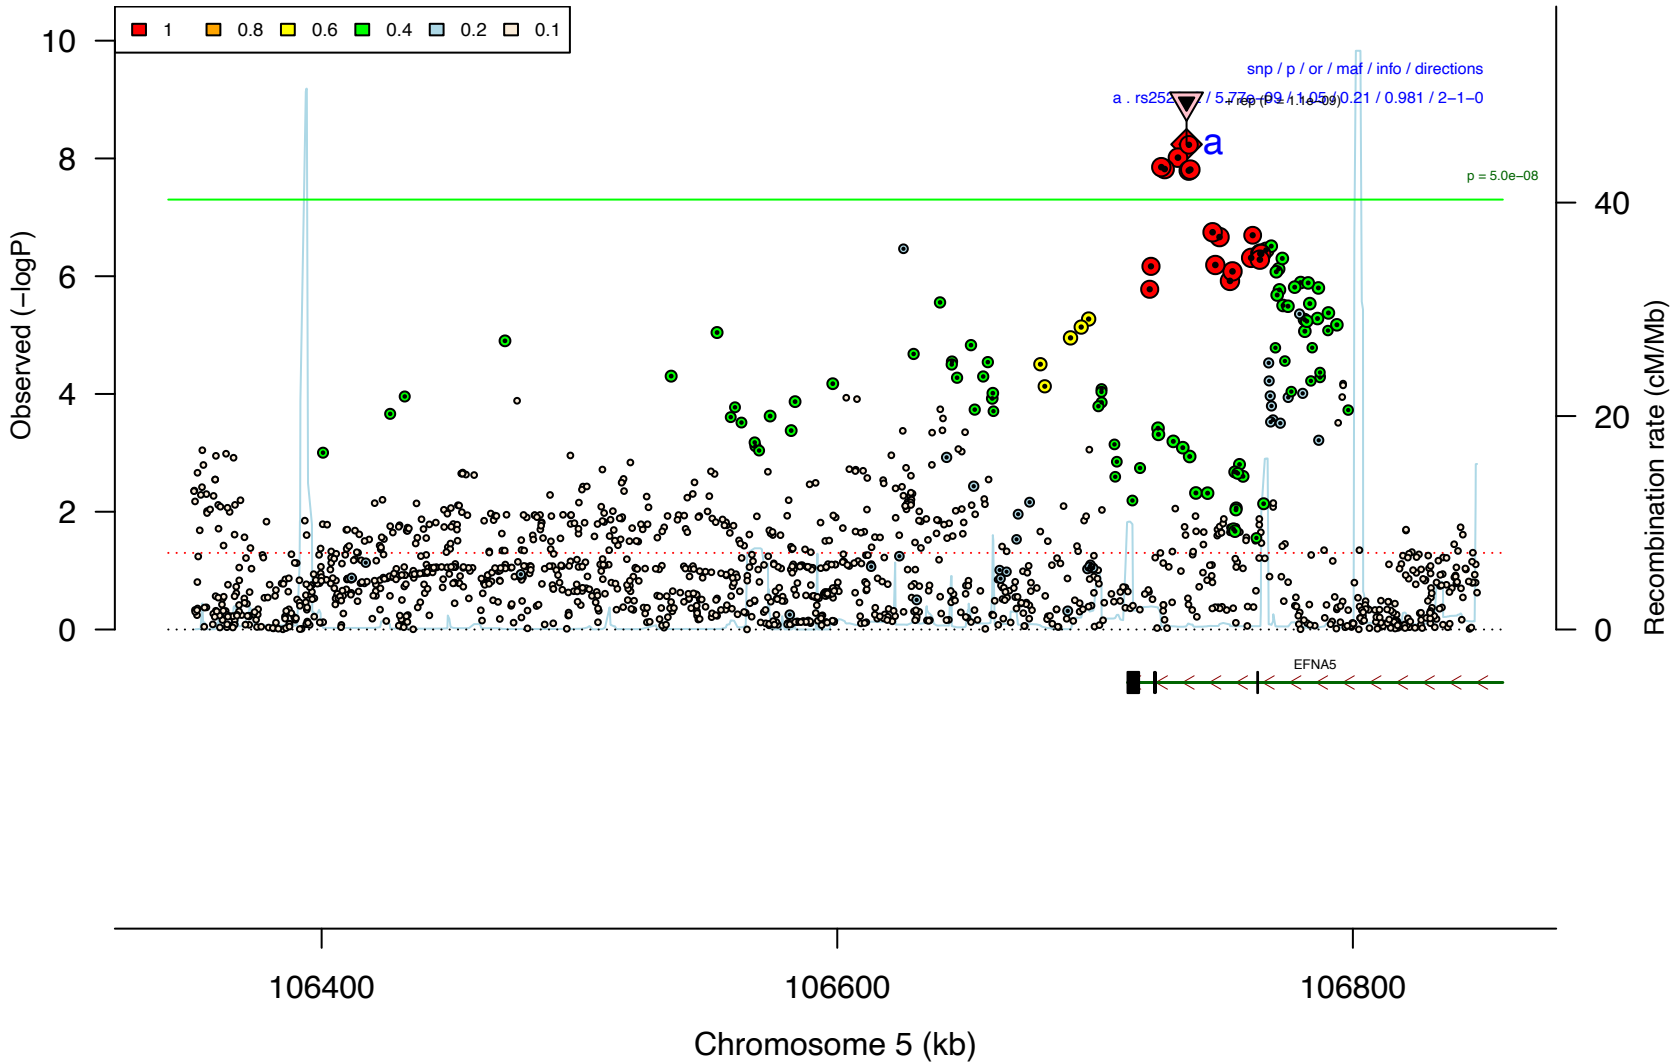

# PGC\_SCZ\_w3\_90\_0418b.147.chr6

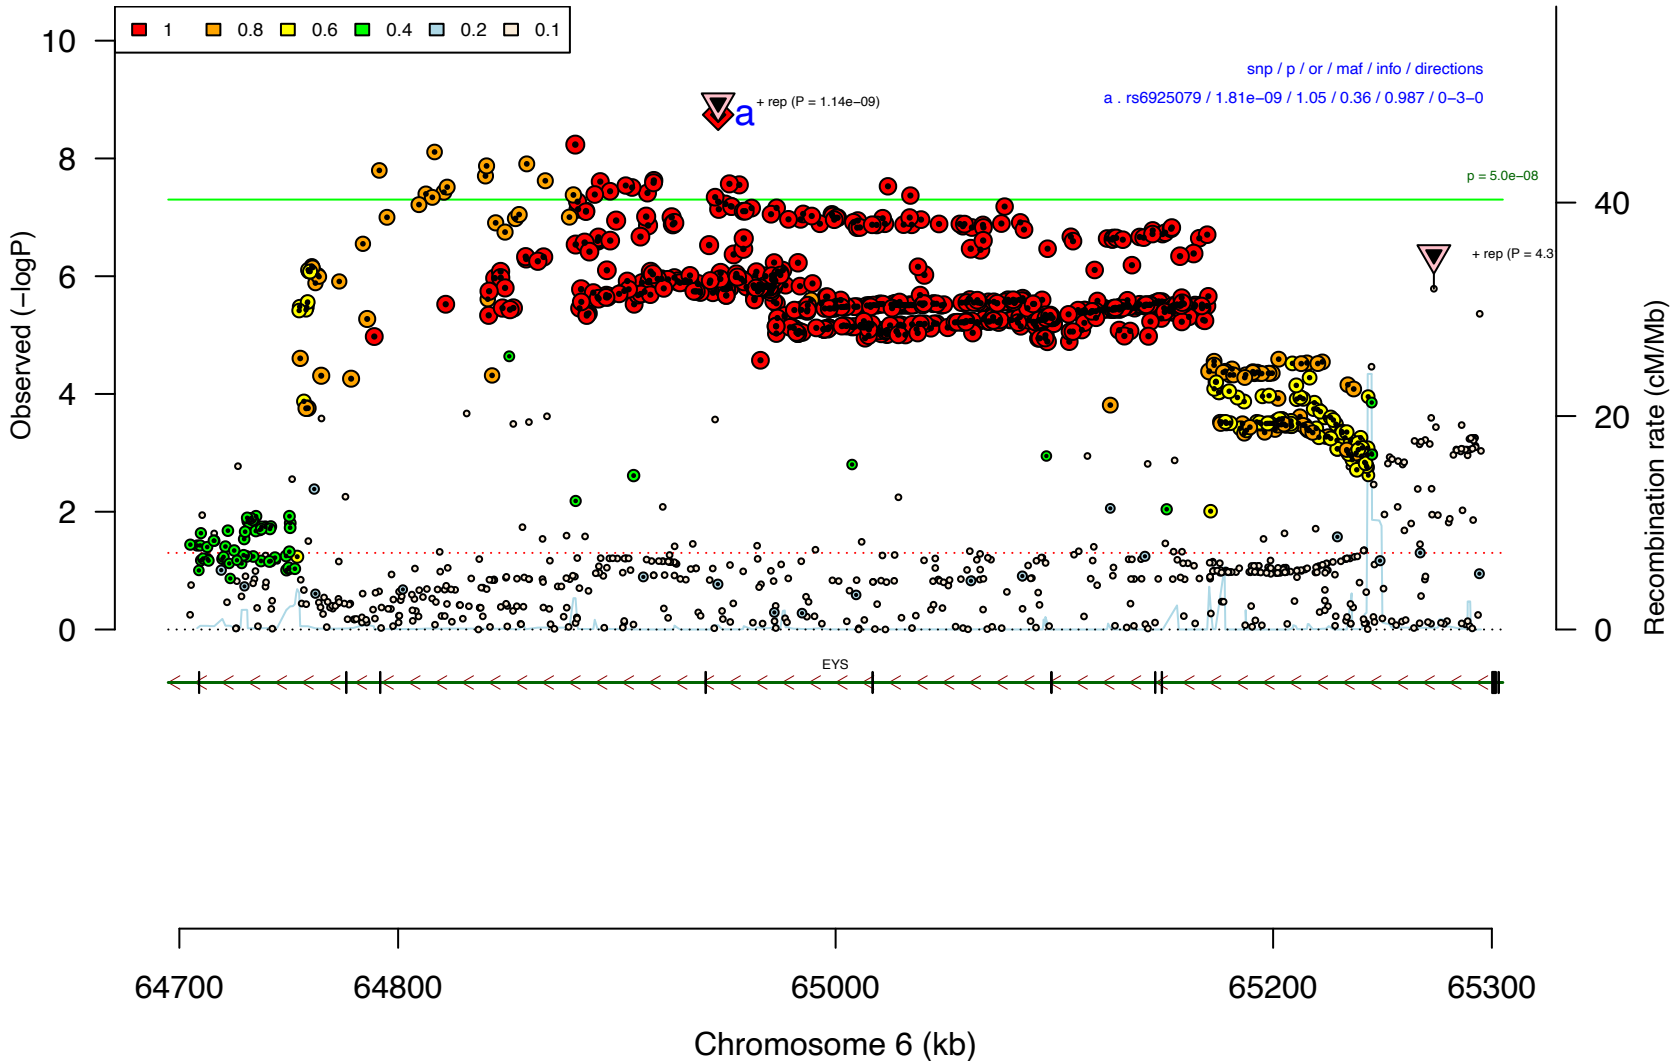

# PGC\_SCZ\_w3\_90\_0418b.148.chr15

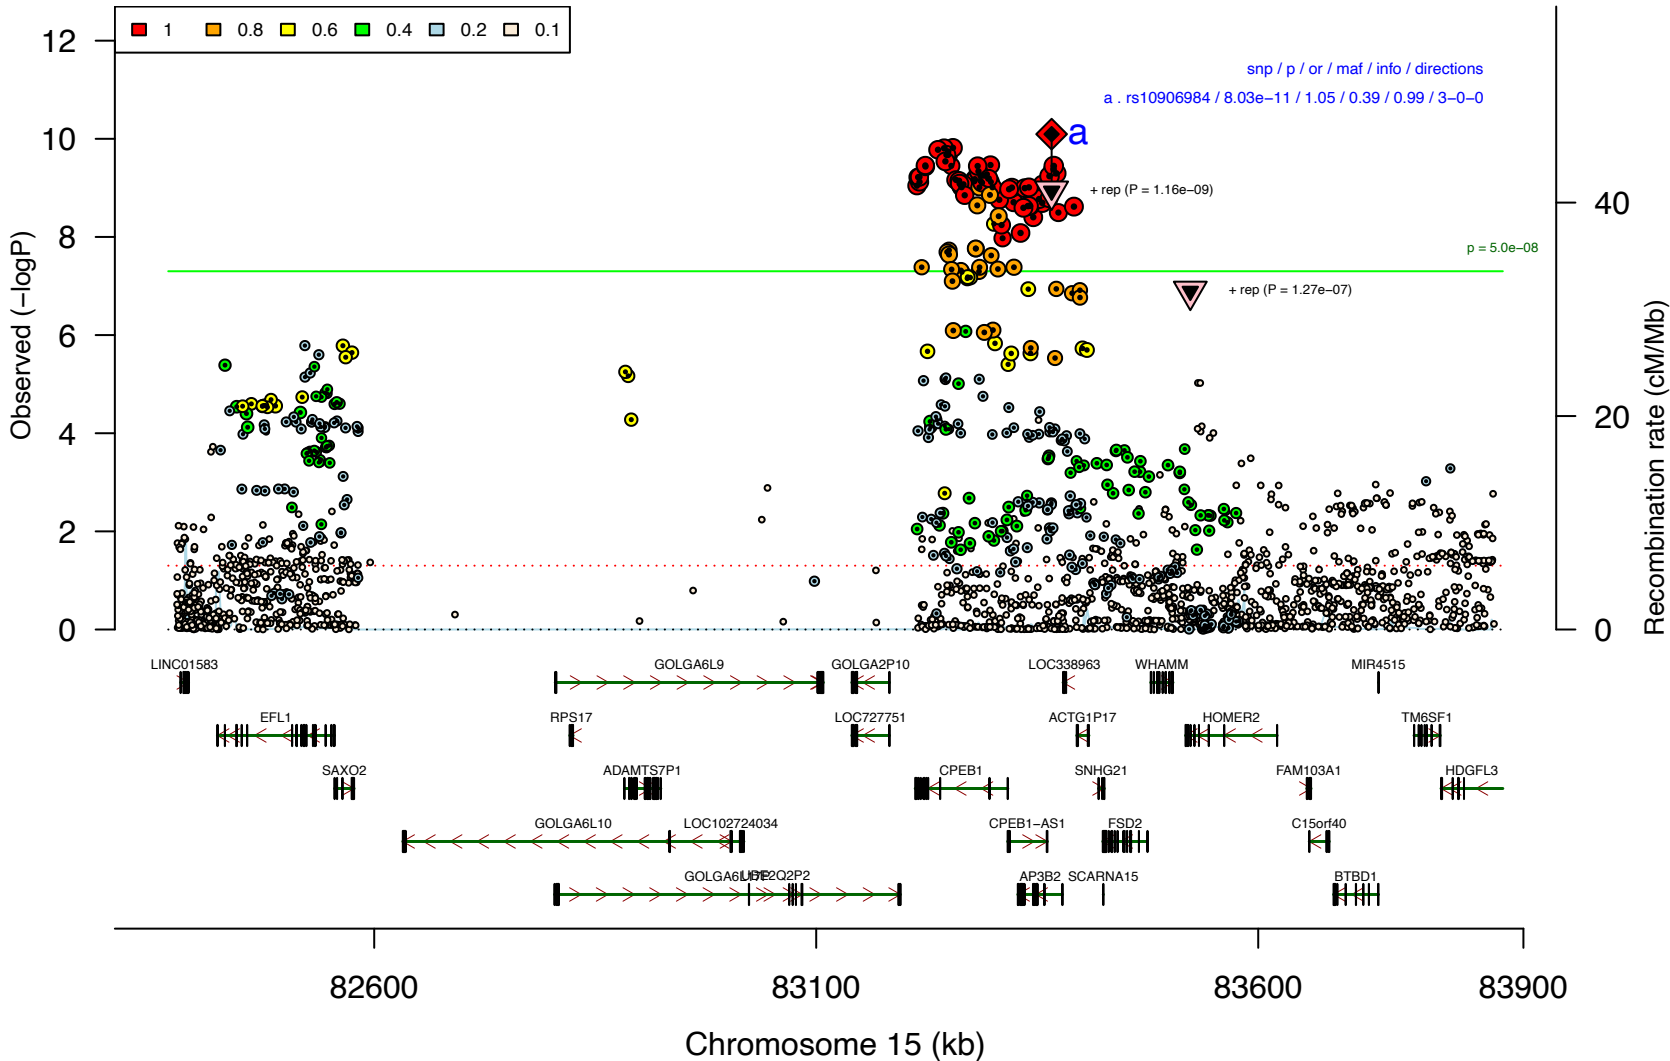



# PGC\_SCZ\_w3\_90\_0418b.149.chr9

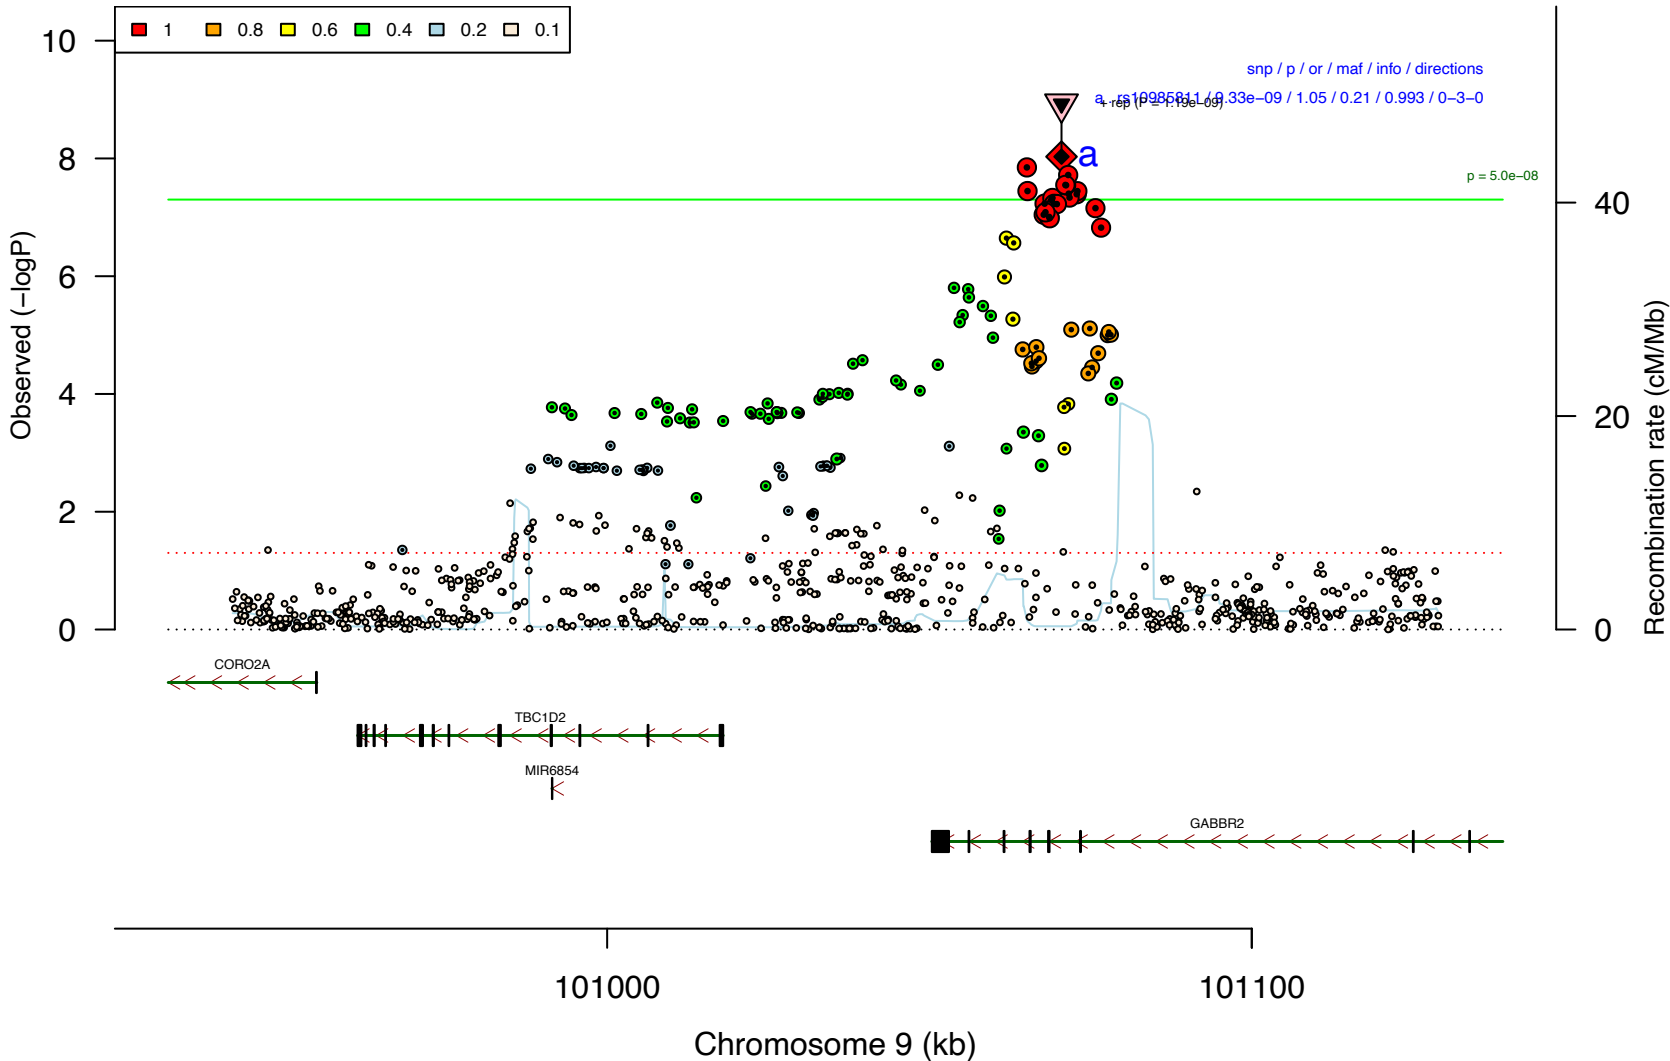

# PGC\_SCZ\_w3\_90\_0418b.150.chr6

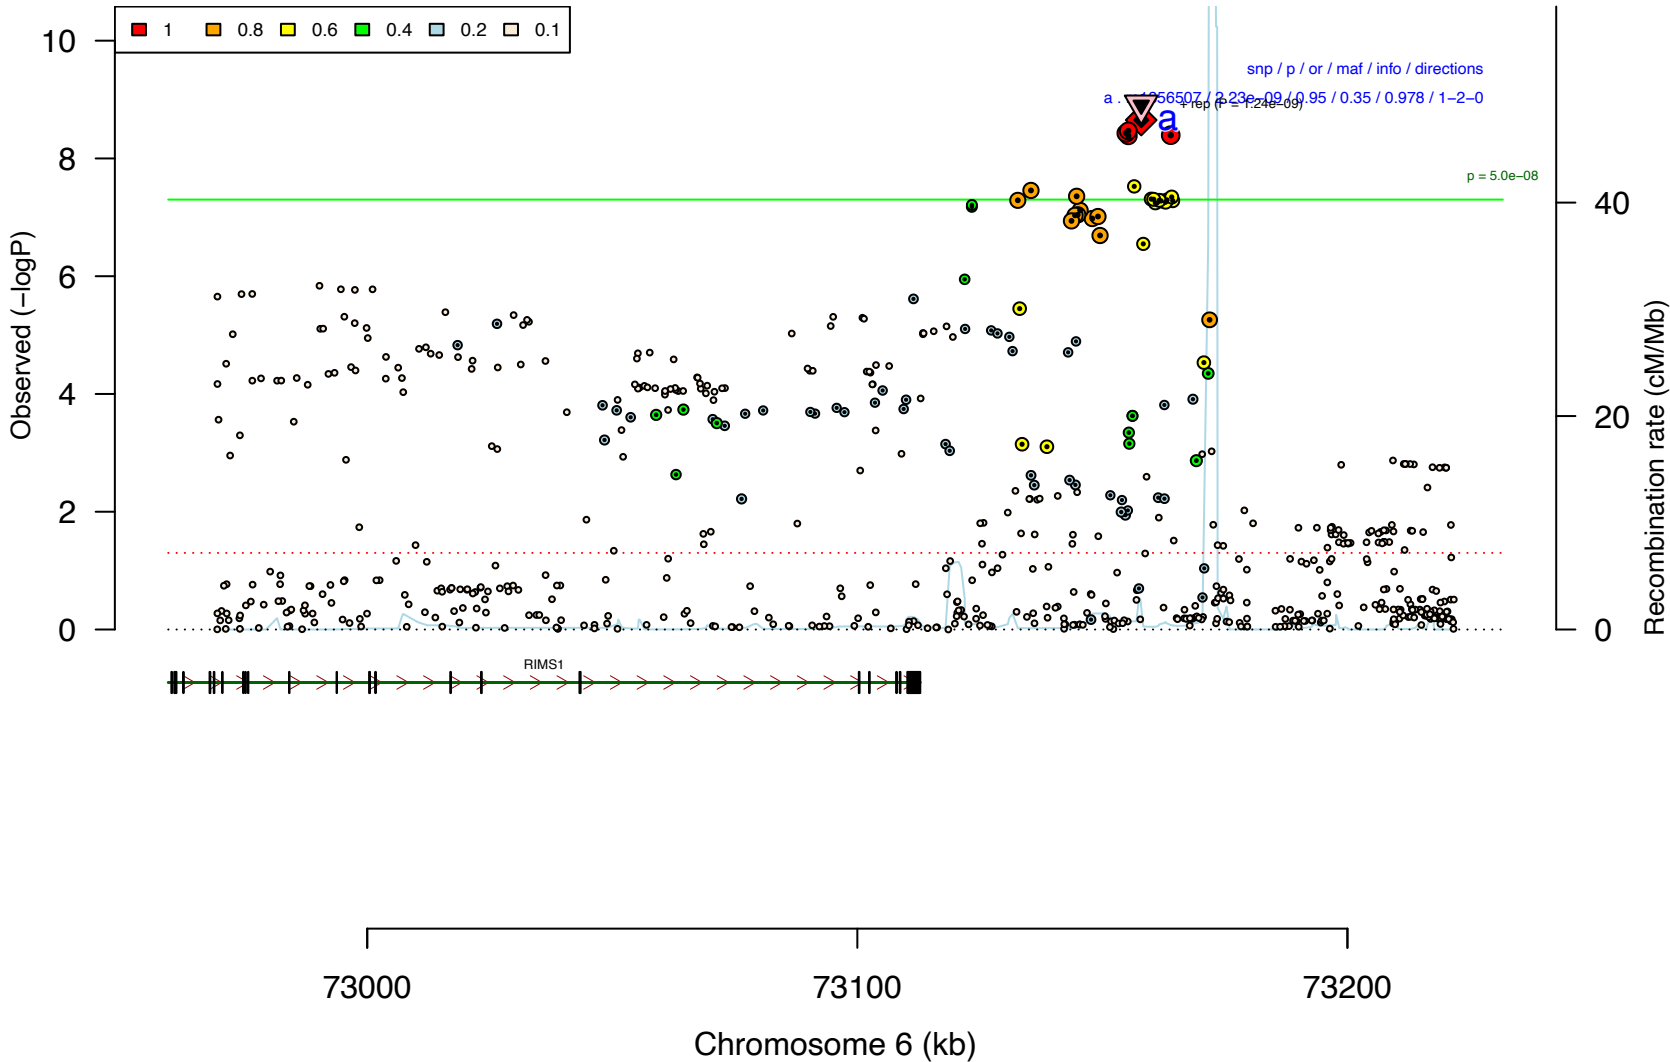

# PGC\_SCZ\_w3\_90\_0418b.151.chr10

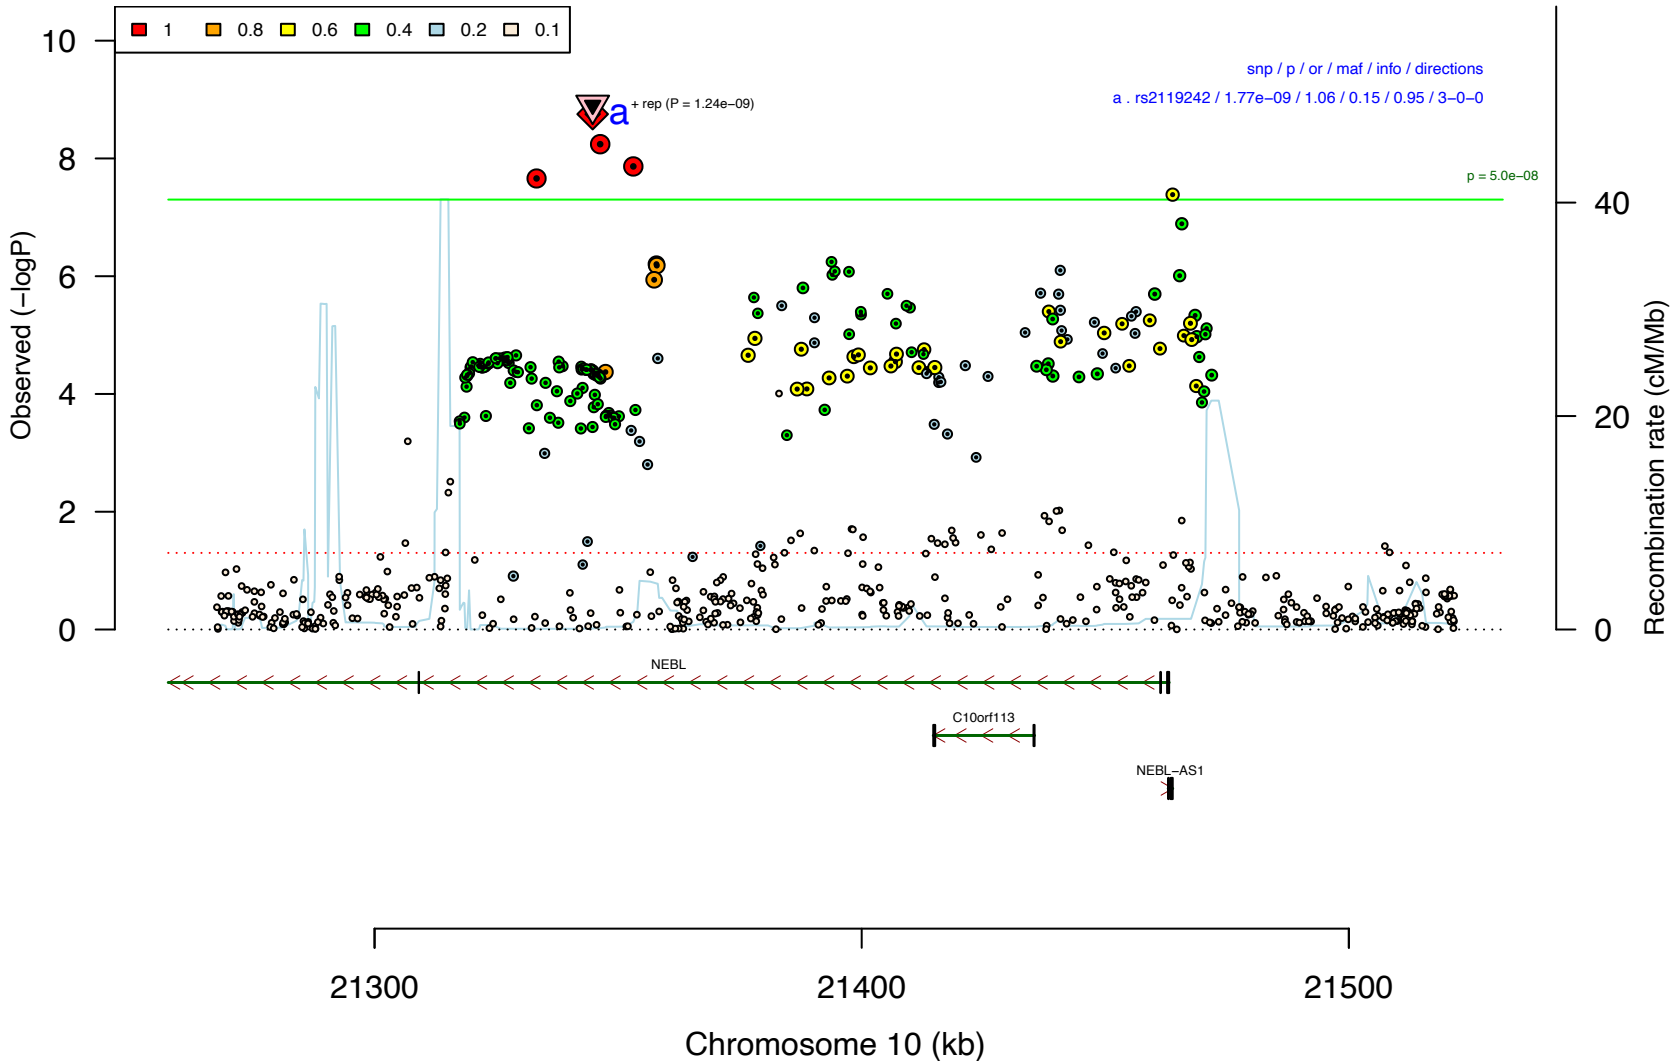

# PGC\_SCZ\_w3\_90\_0418b.152.chr7

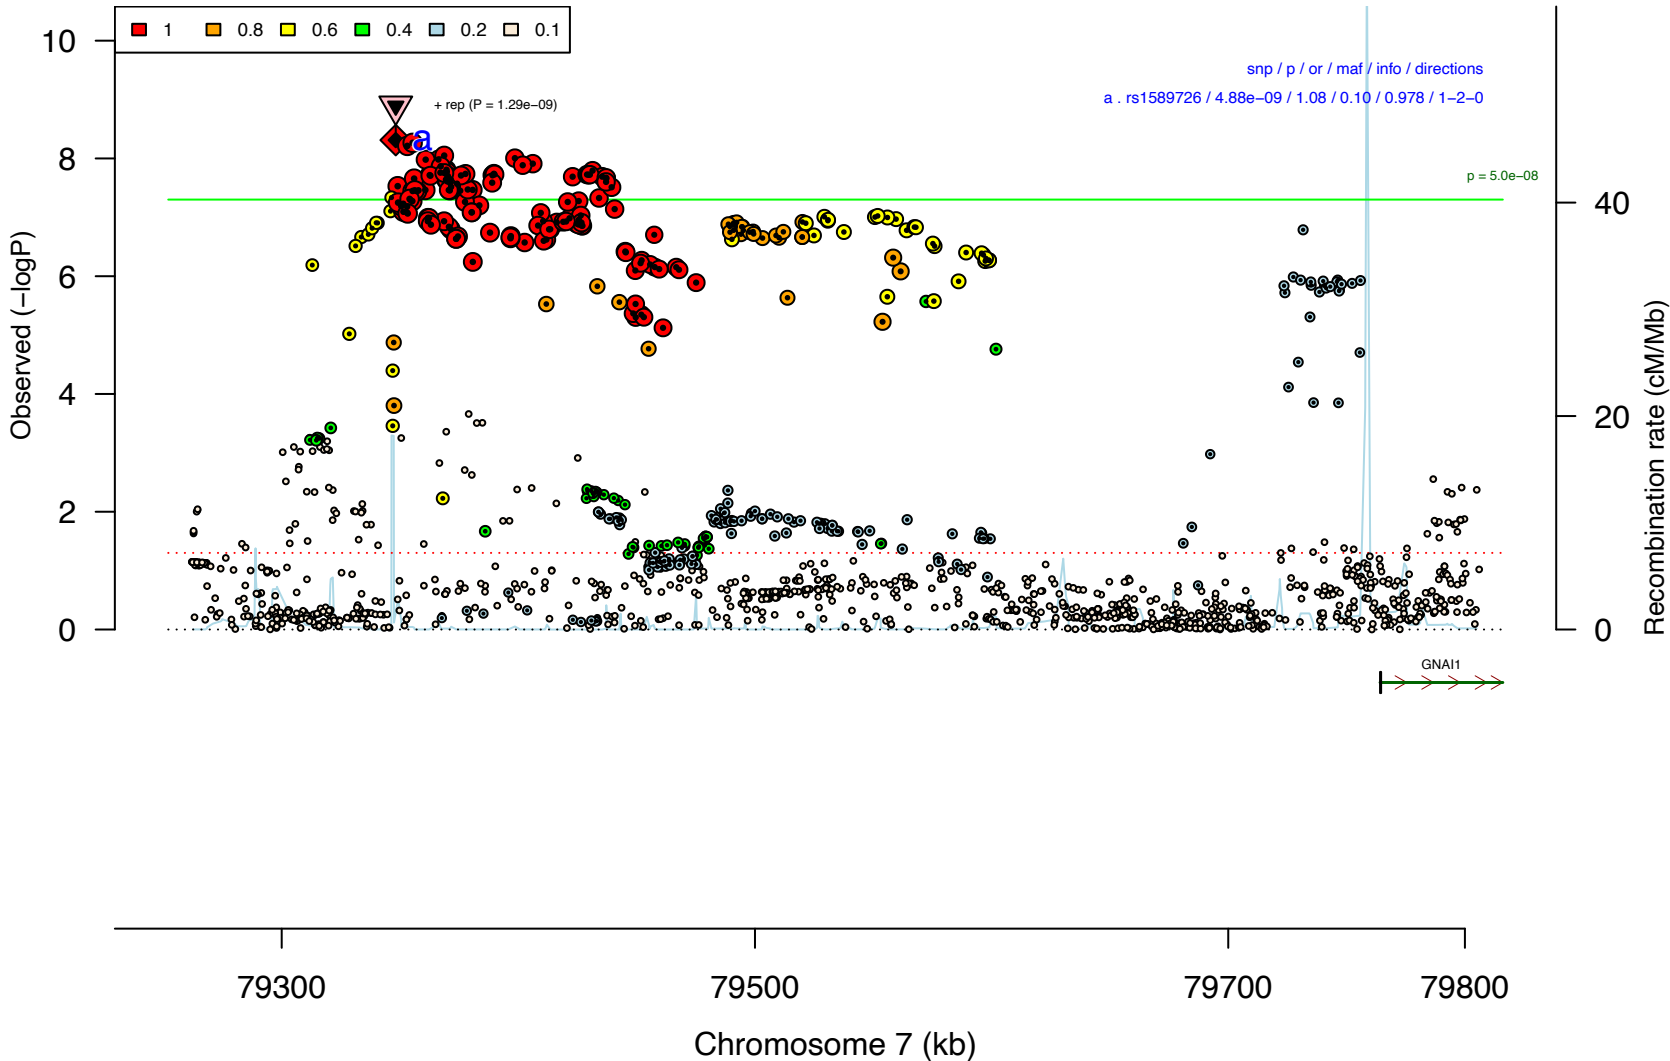

# PGC\_SCZ\_w3\_90\_0418b.153.chr12

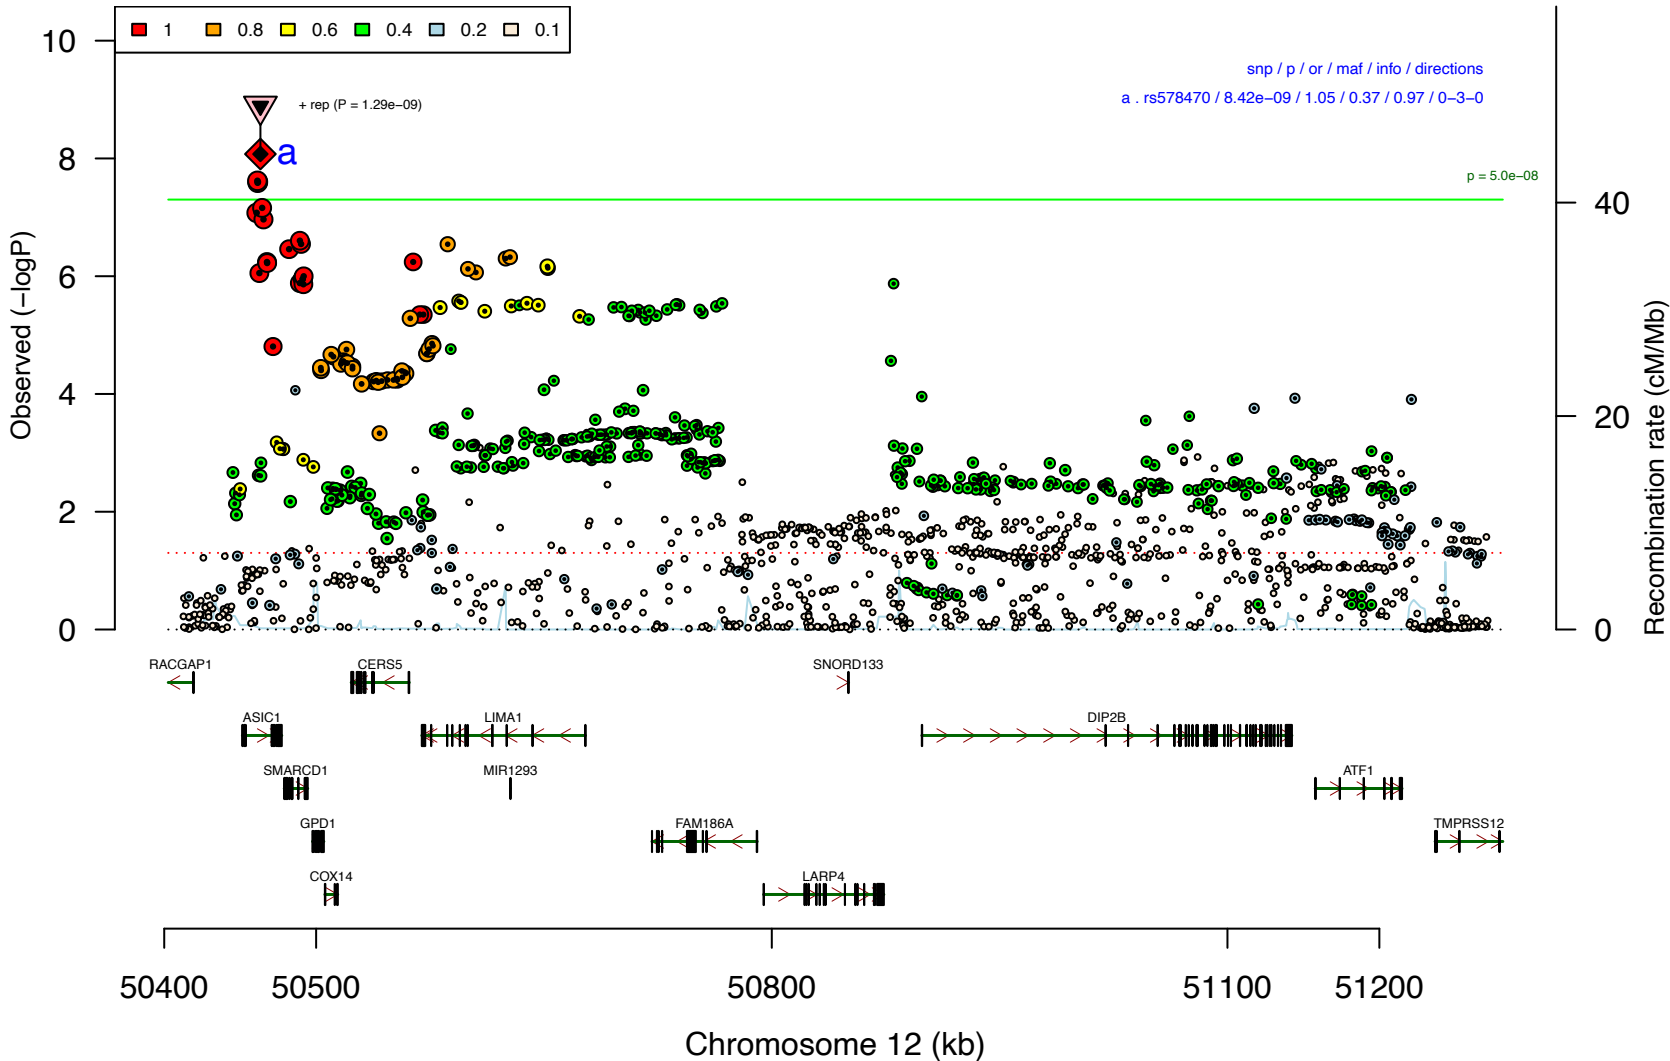

# PGC\_SCZ\_w3\_90\_0418b.154.chr5

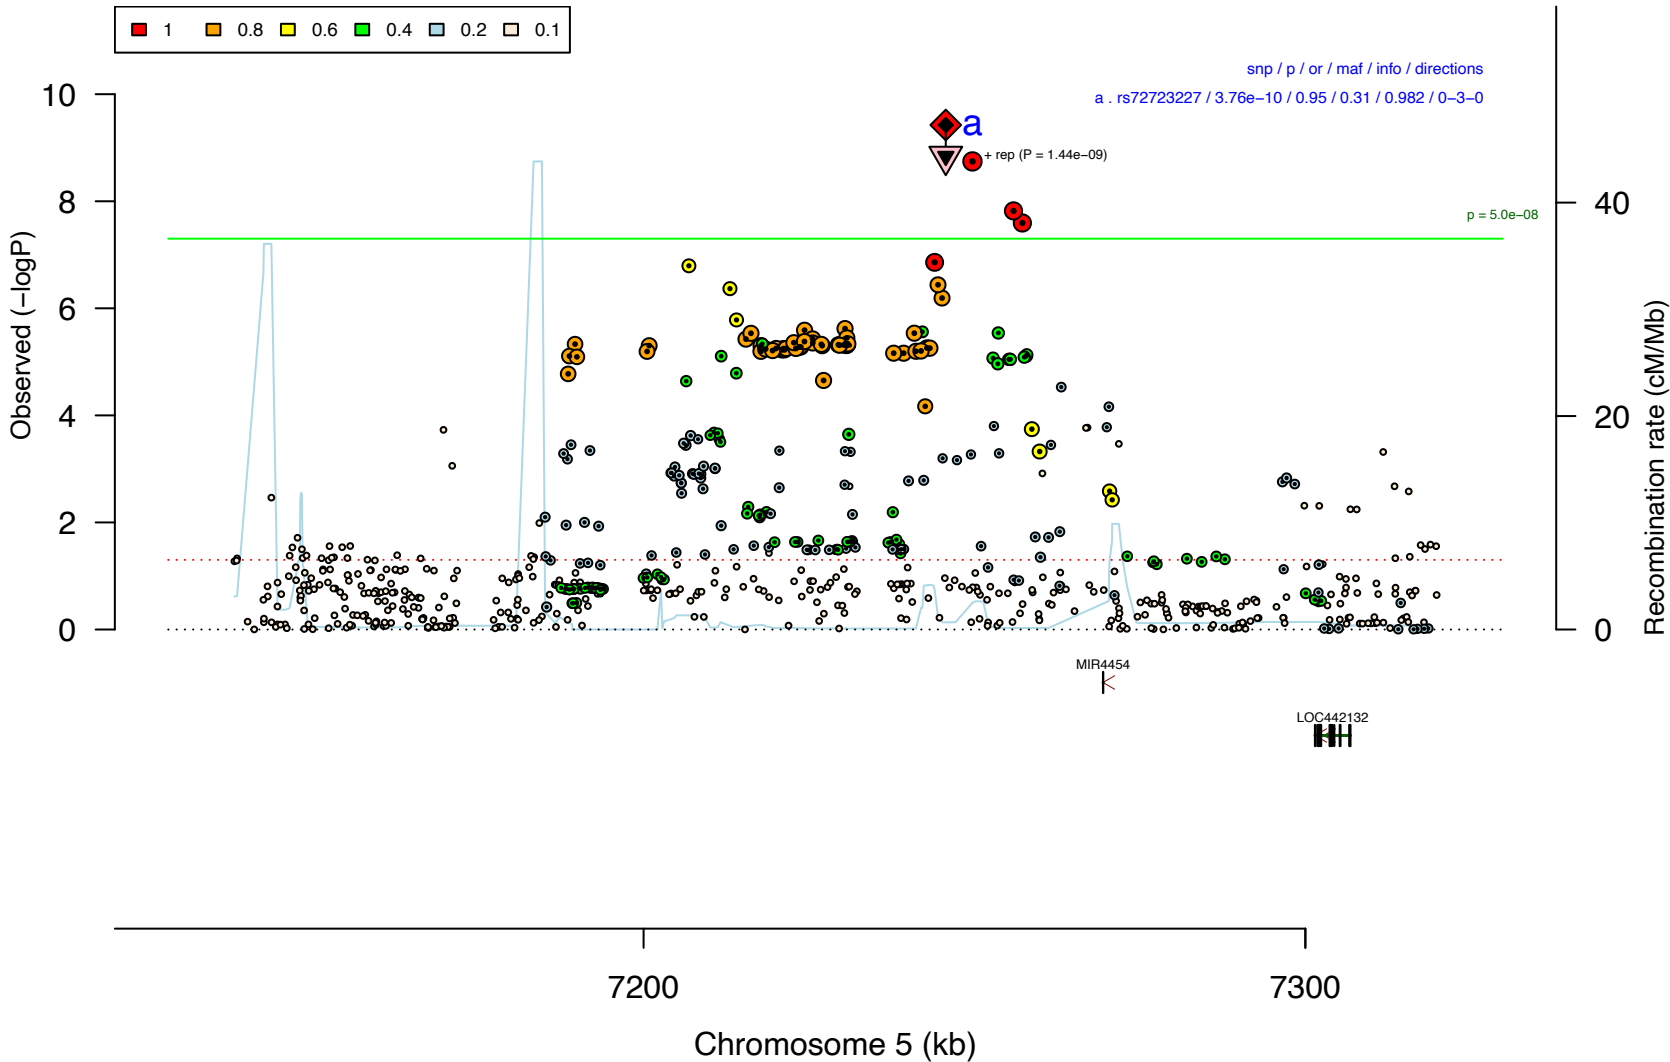

# PGC\_SCZ\_w3\_90\_0418b.155.chr2

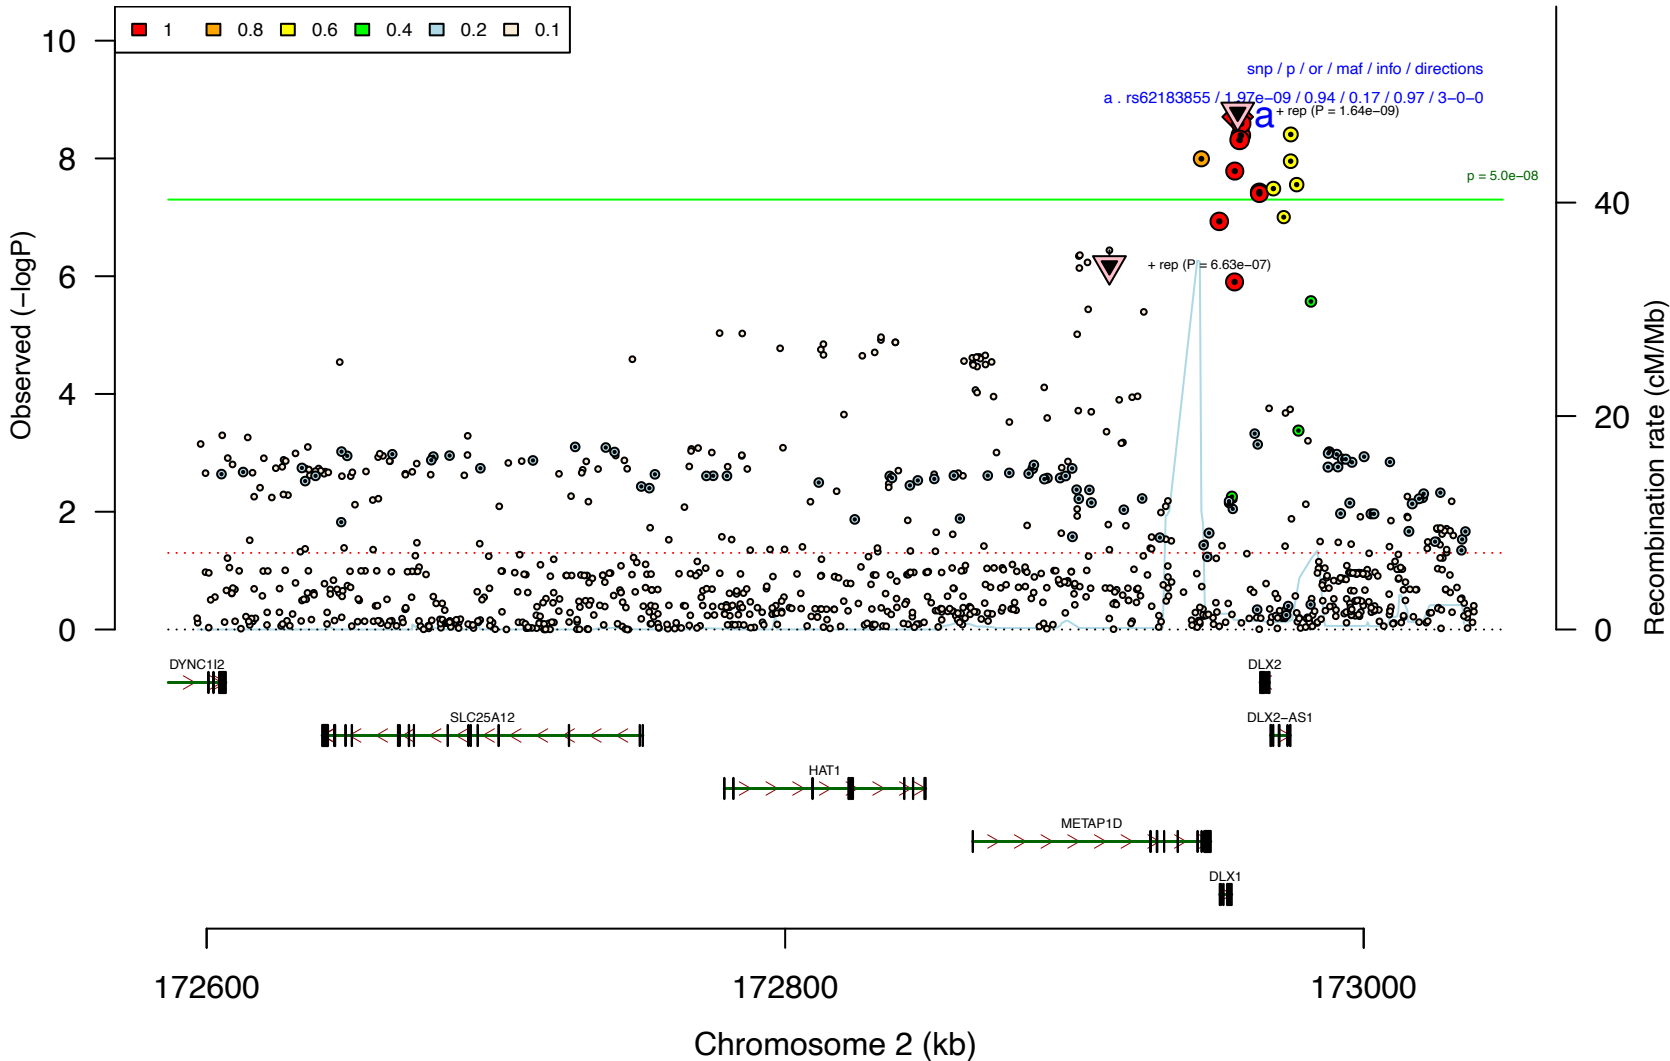

# PGC\_SCZ\_w3\_90\_0418b.156.chr6

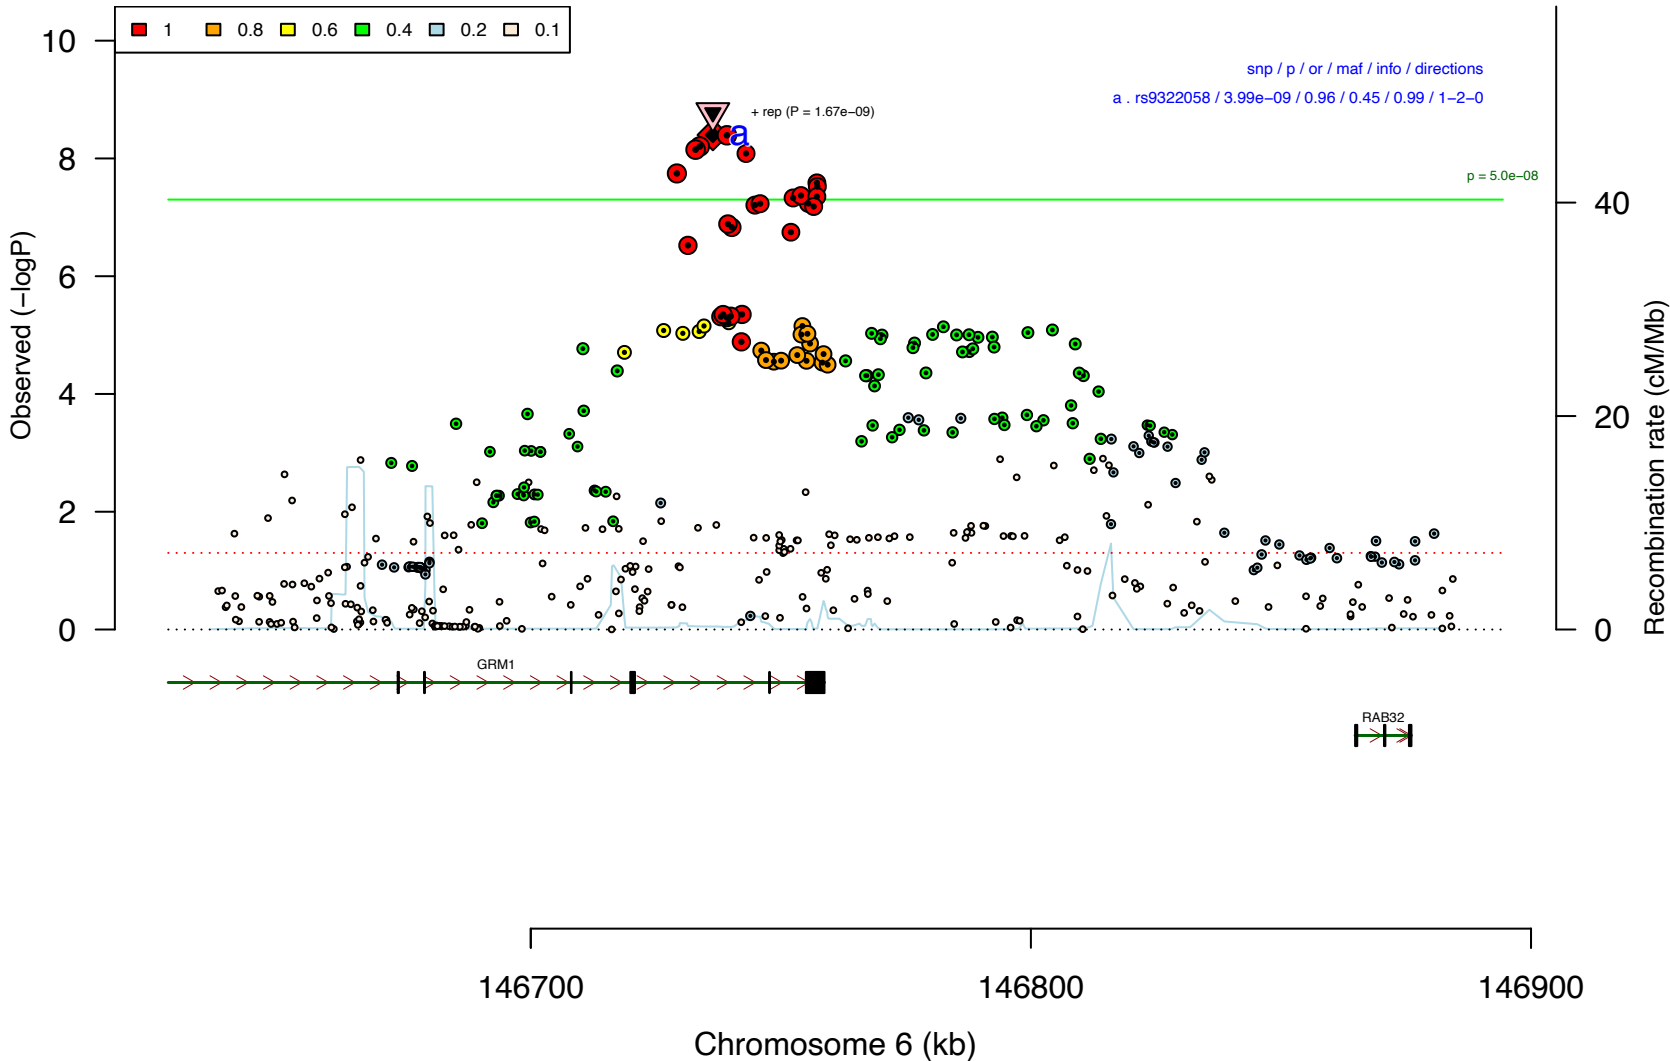



# PGC\_SCZ\_w3\_90\_0418b.157.chr12

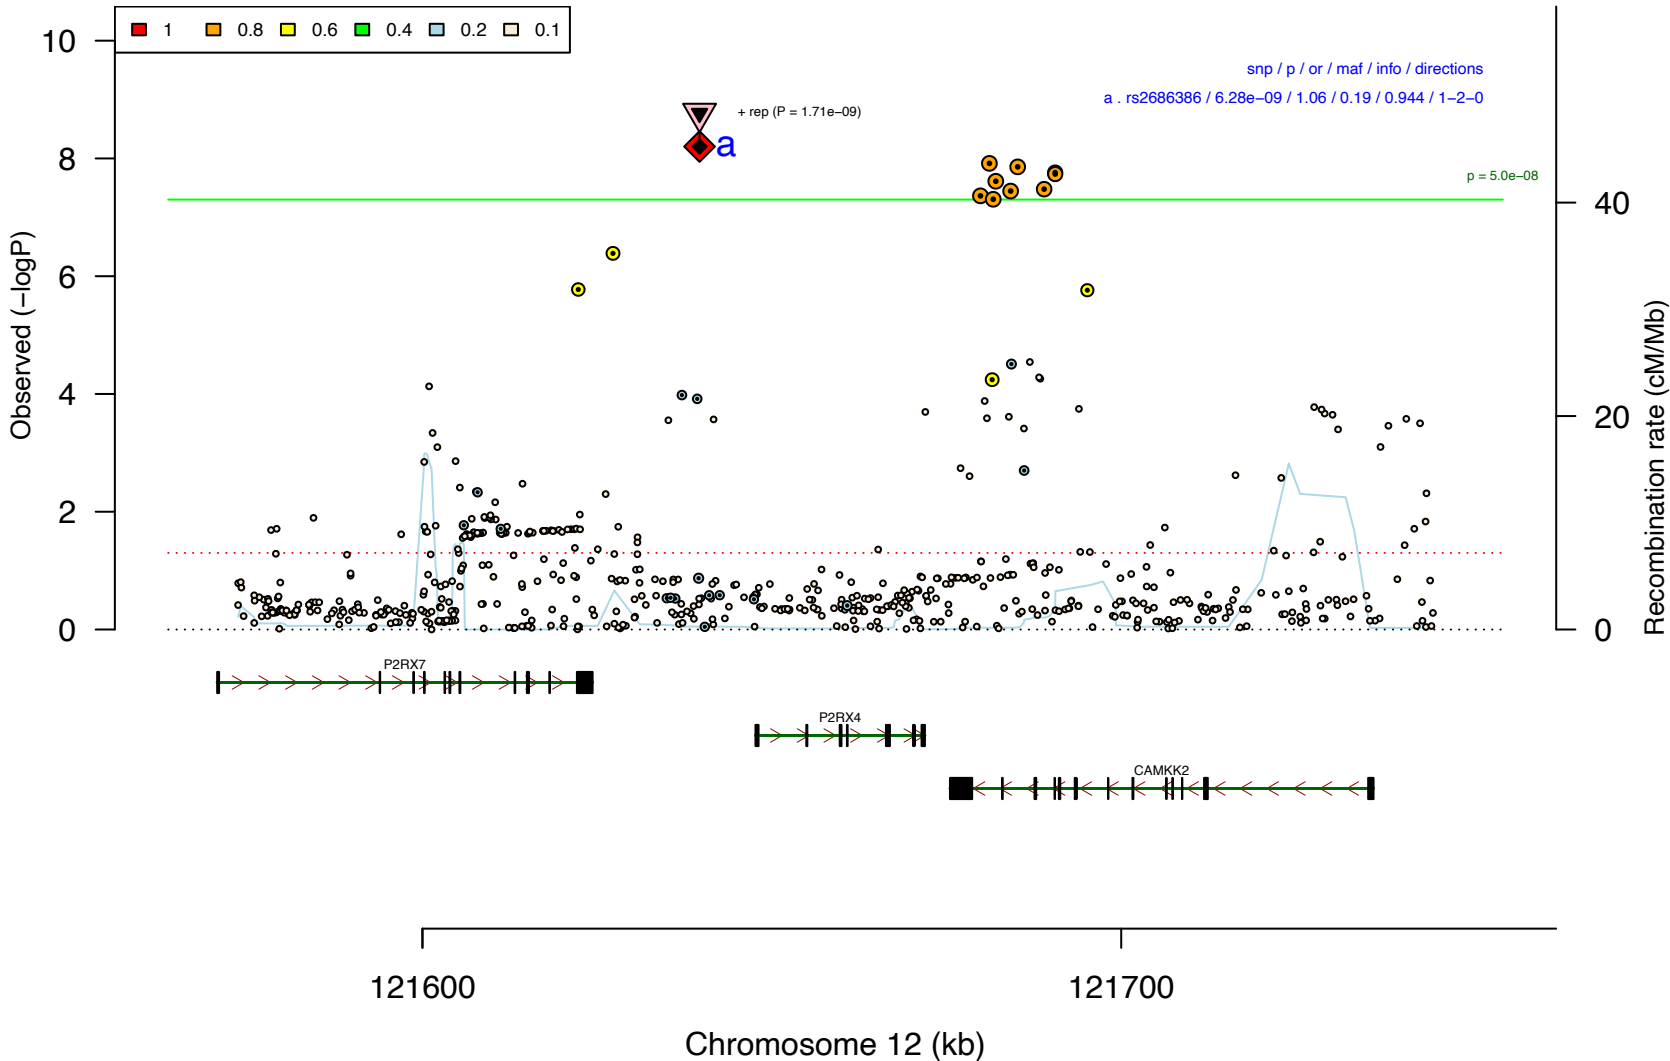

# PGC\_SCZ\_w3\_90\_0418b.158.chr11

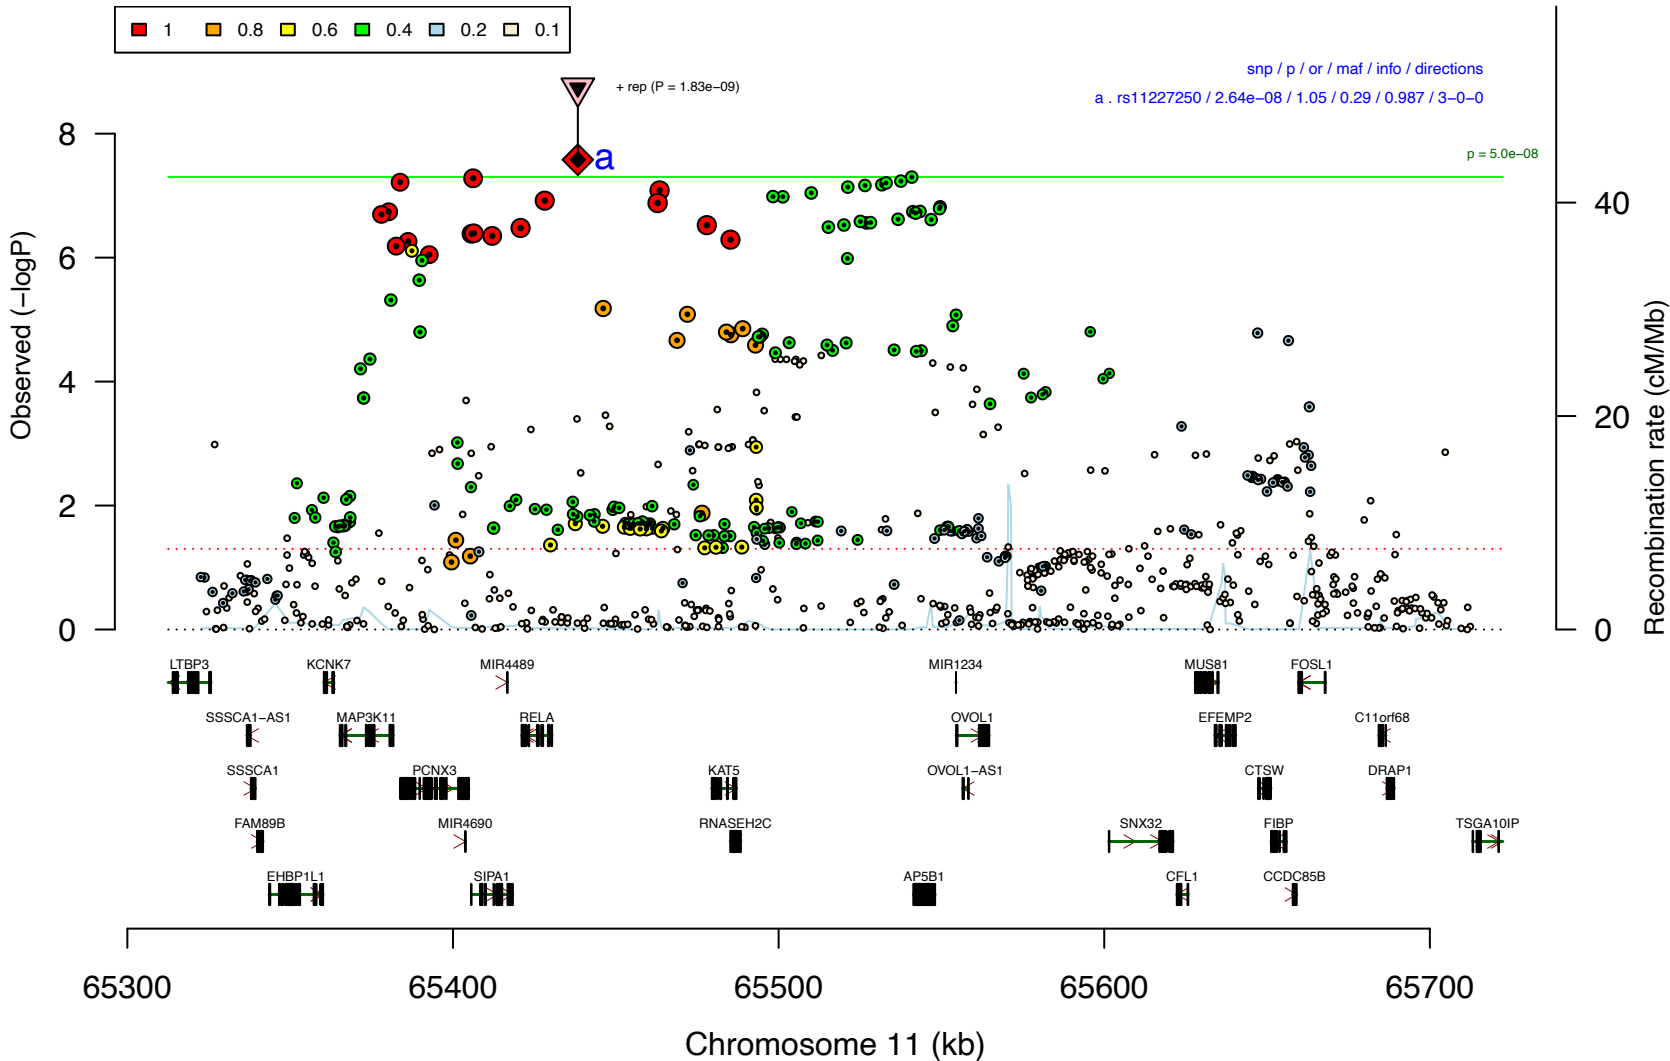

# PGC\_SCZ\_w3\_90\_0418b.159.chr9

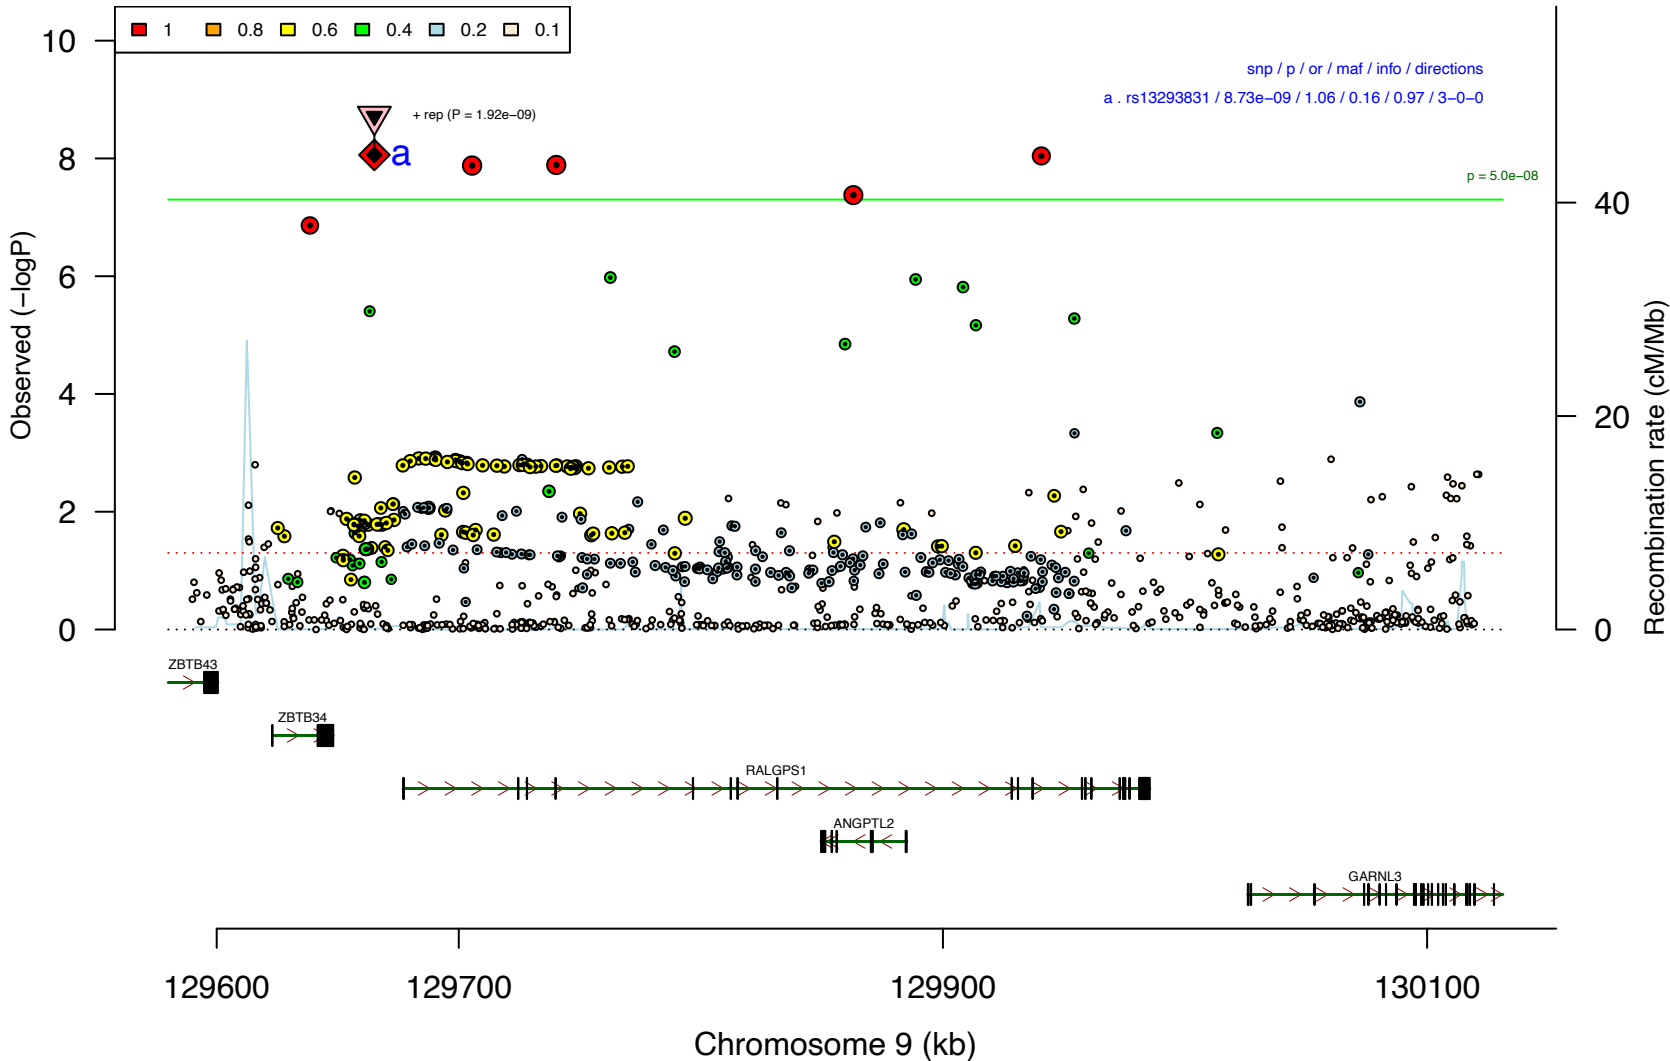

# PGC\_SCZ\_w3\_90\_0418b.160.chr18

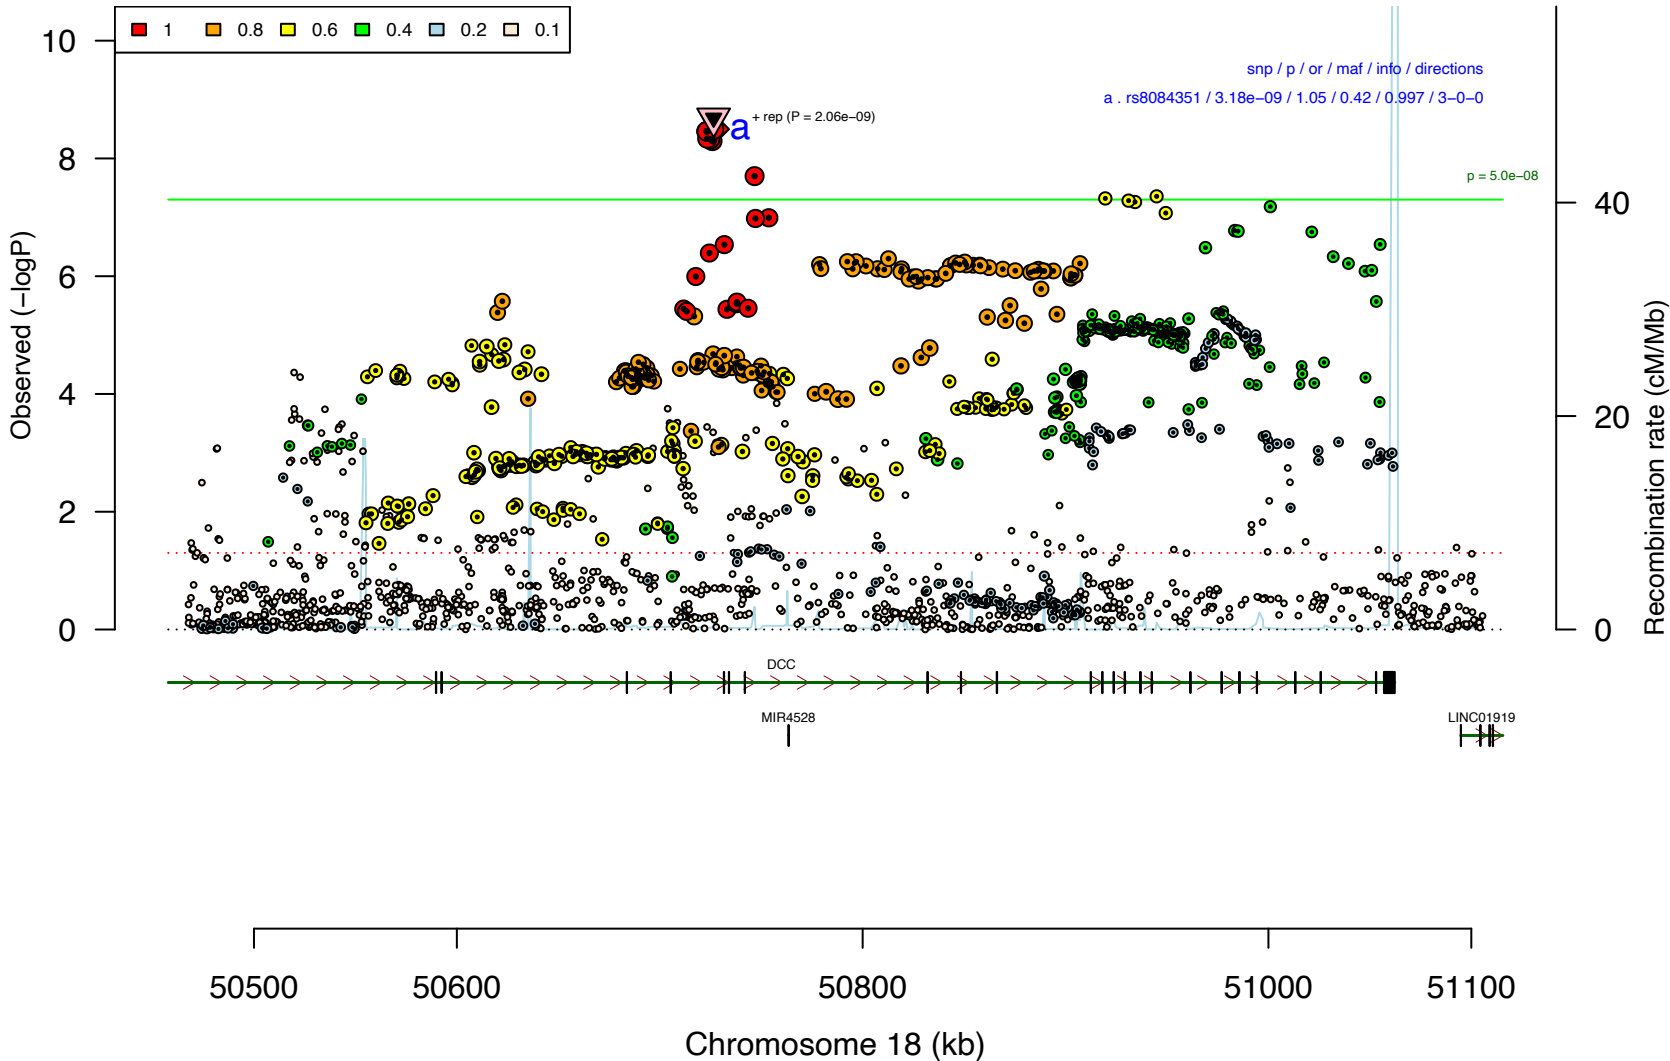

# PGC\_SCZ\_w3\_90\_0418b.161.chr4

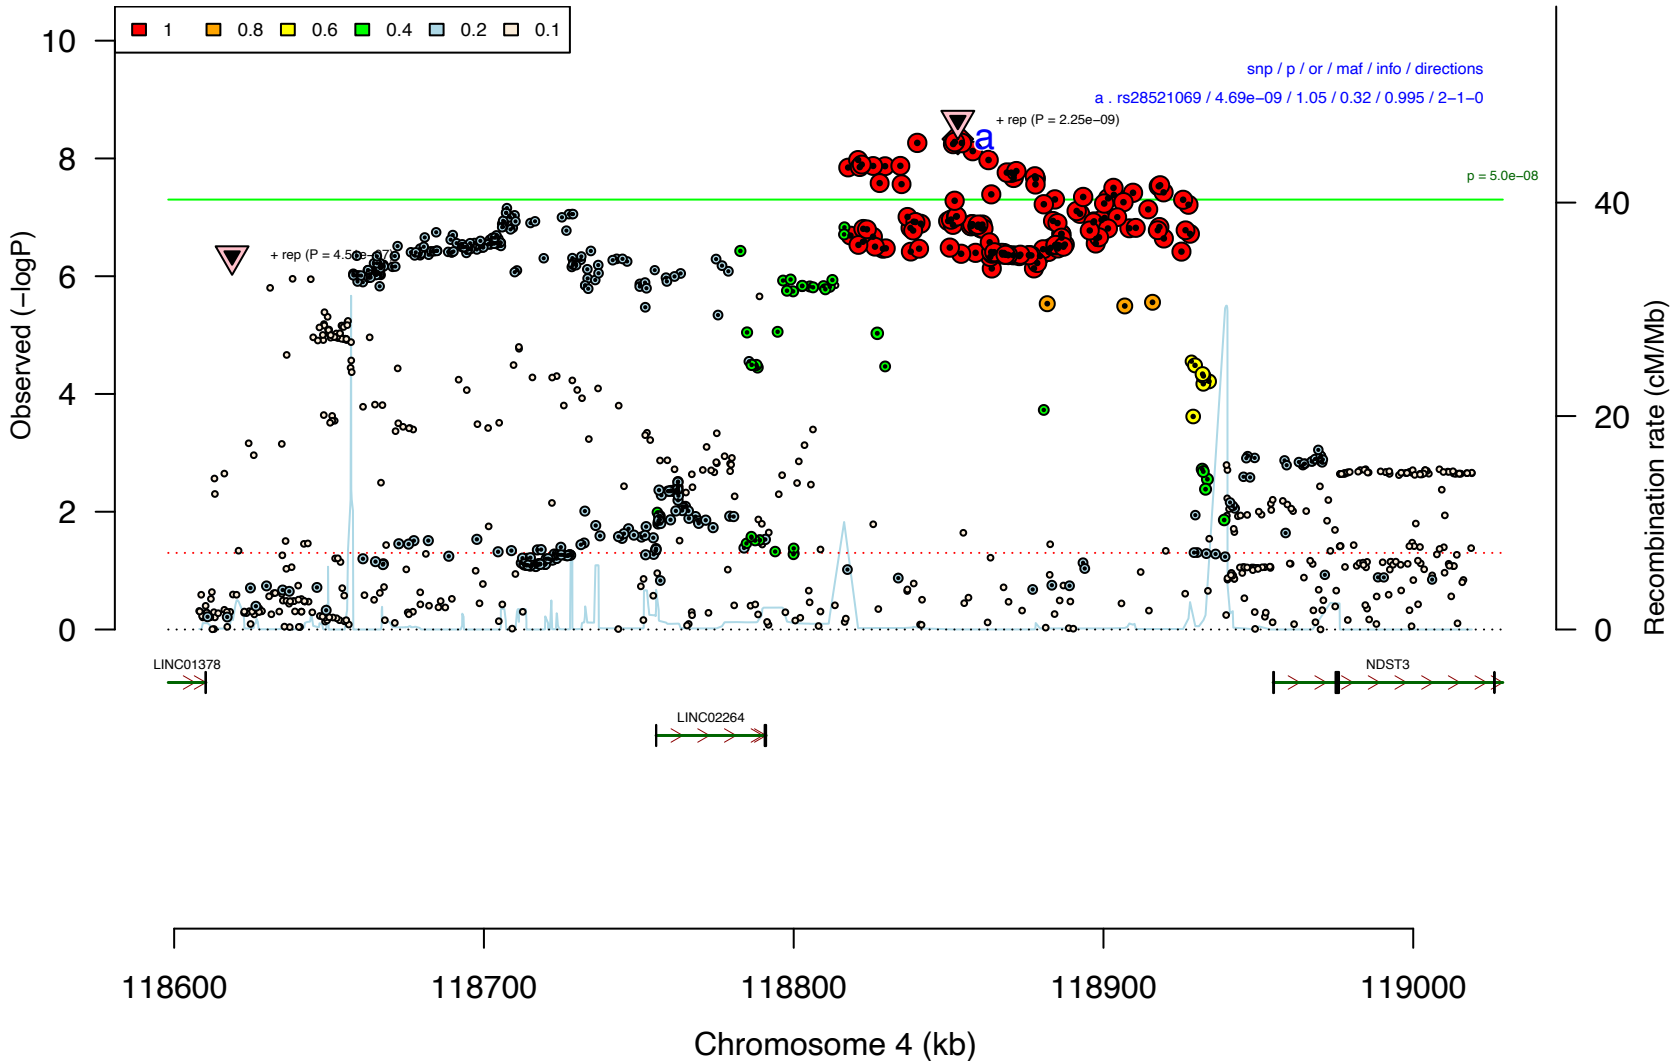

# PGC\_SCZ\_w3\_90\_0418b.162.chr11

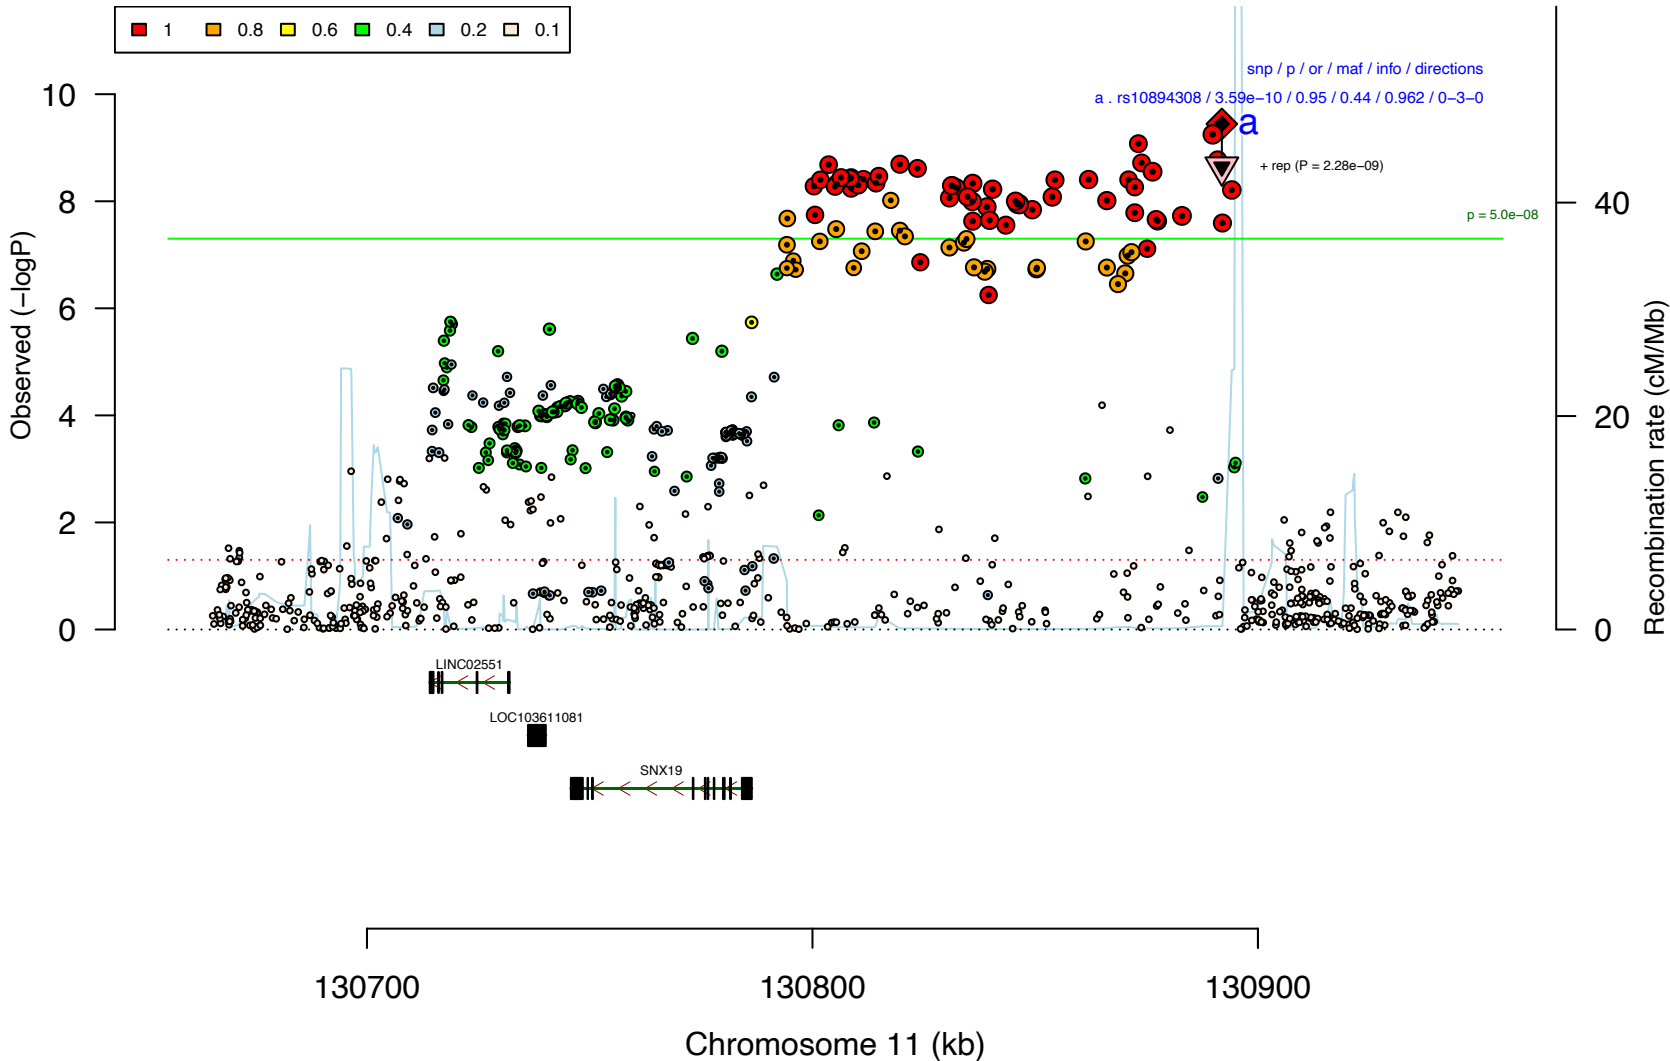

# PGC\_SCZ\_w3\_90\_0418b.163.chr13

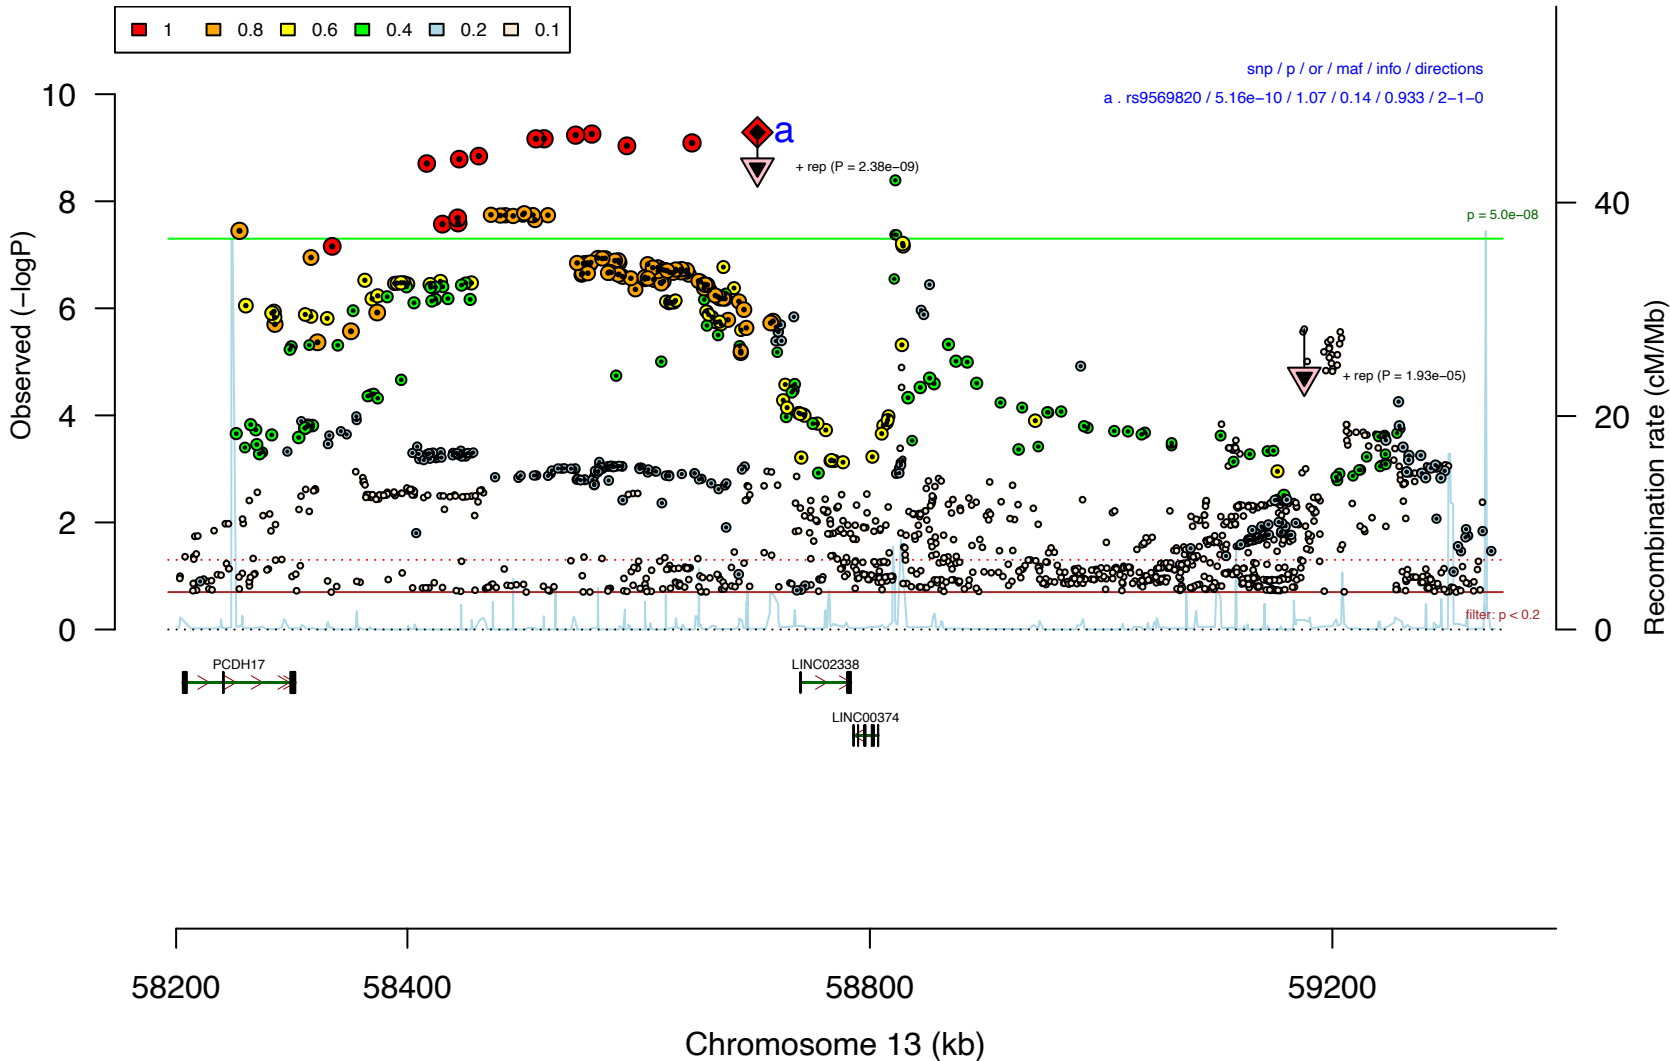

# PGC\_SCZ\_w3\_90\_0418b.164.chr1

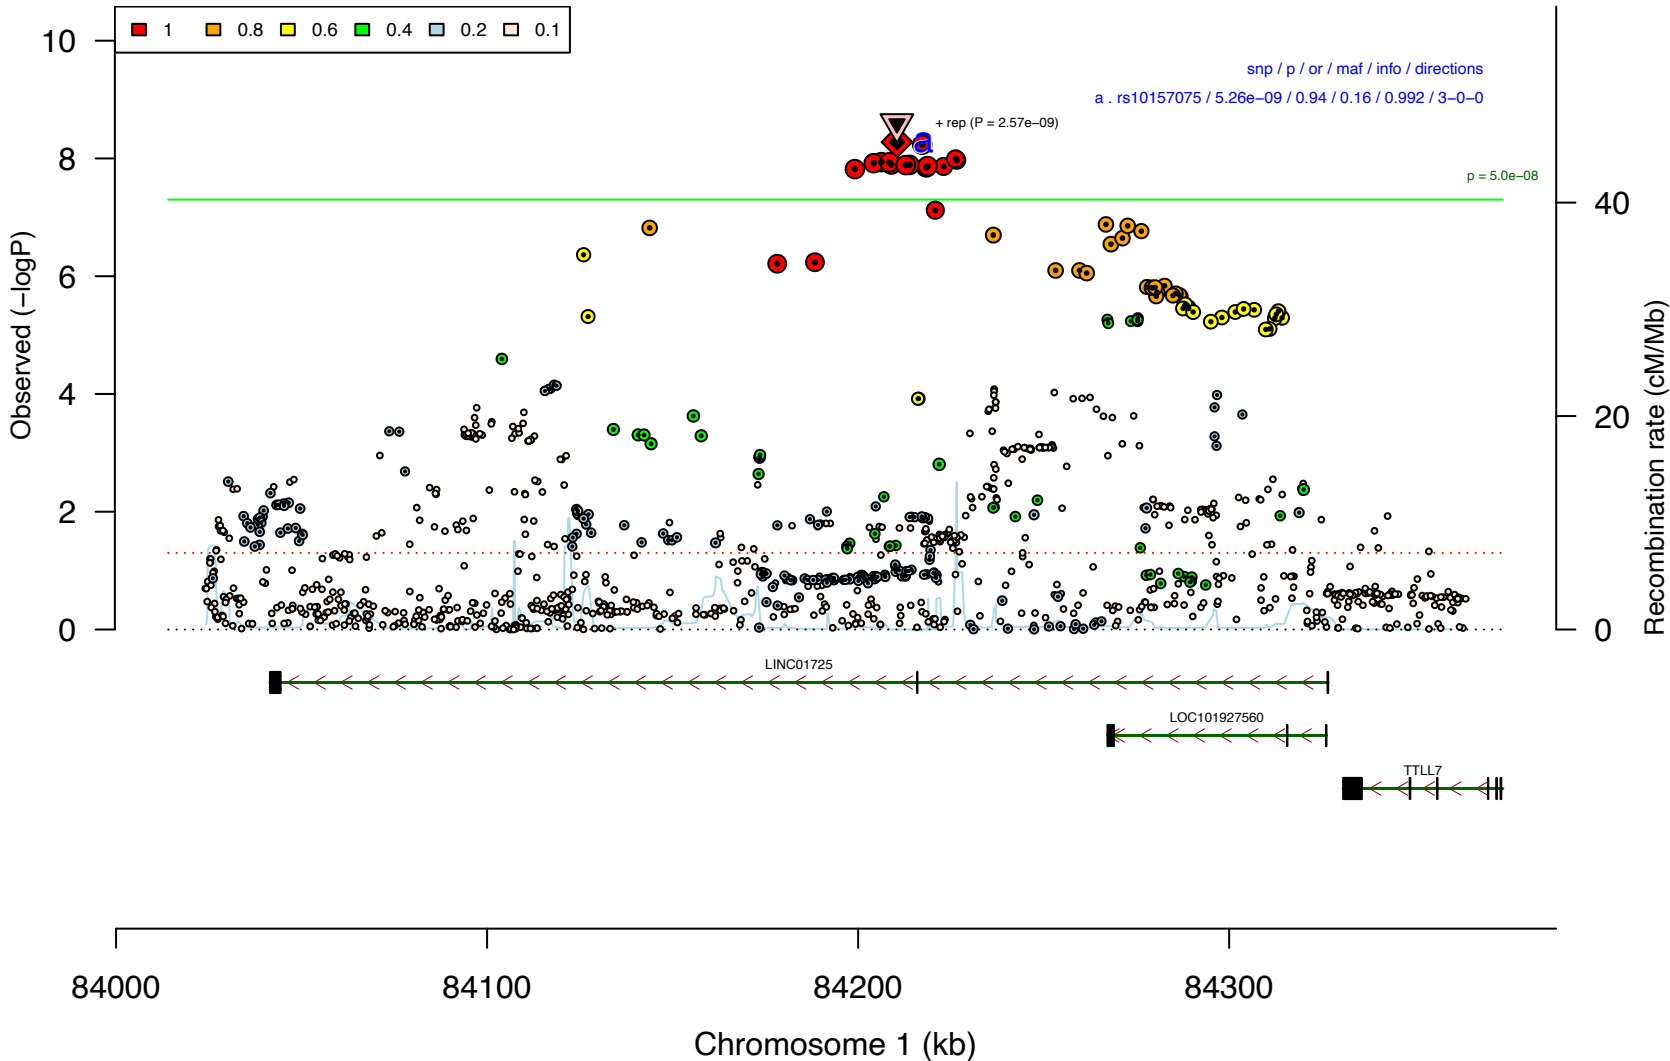



# PGC\_SCZ\_w3\_90\_0418b.165.chr2

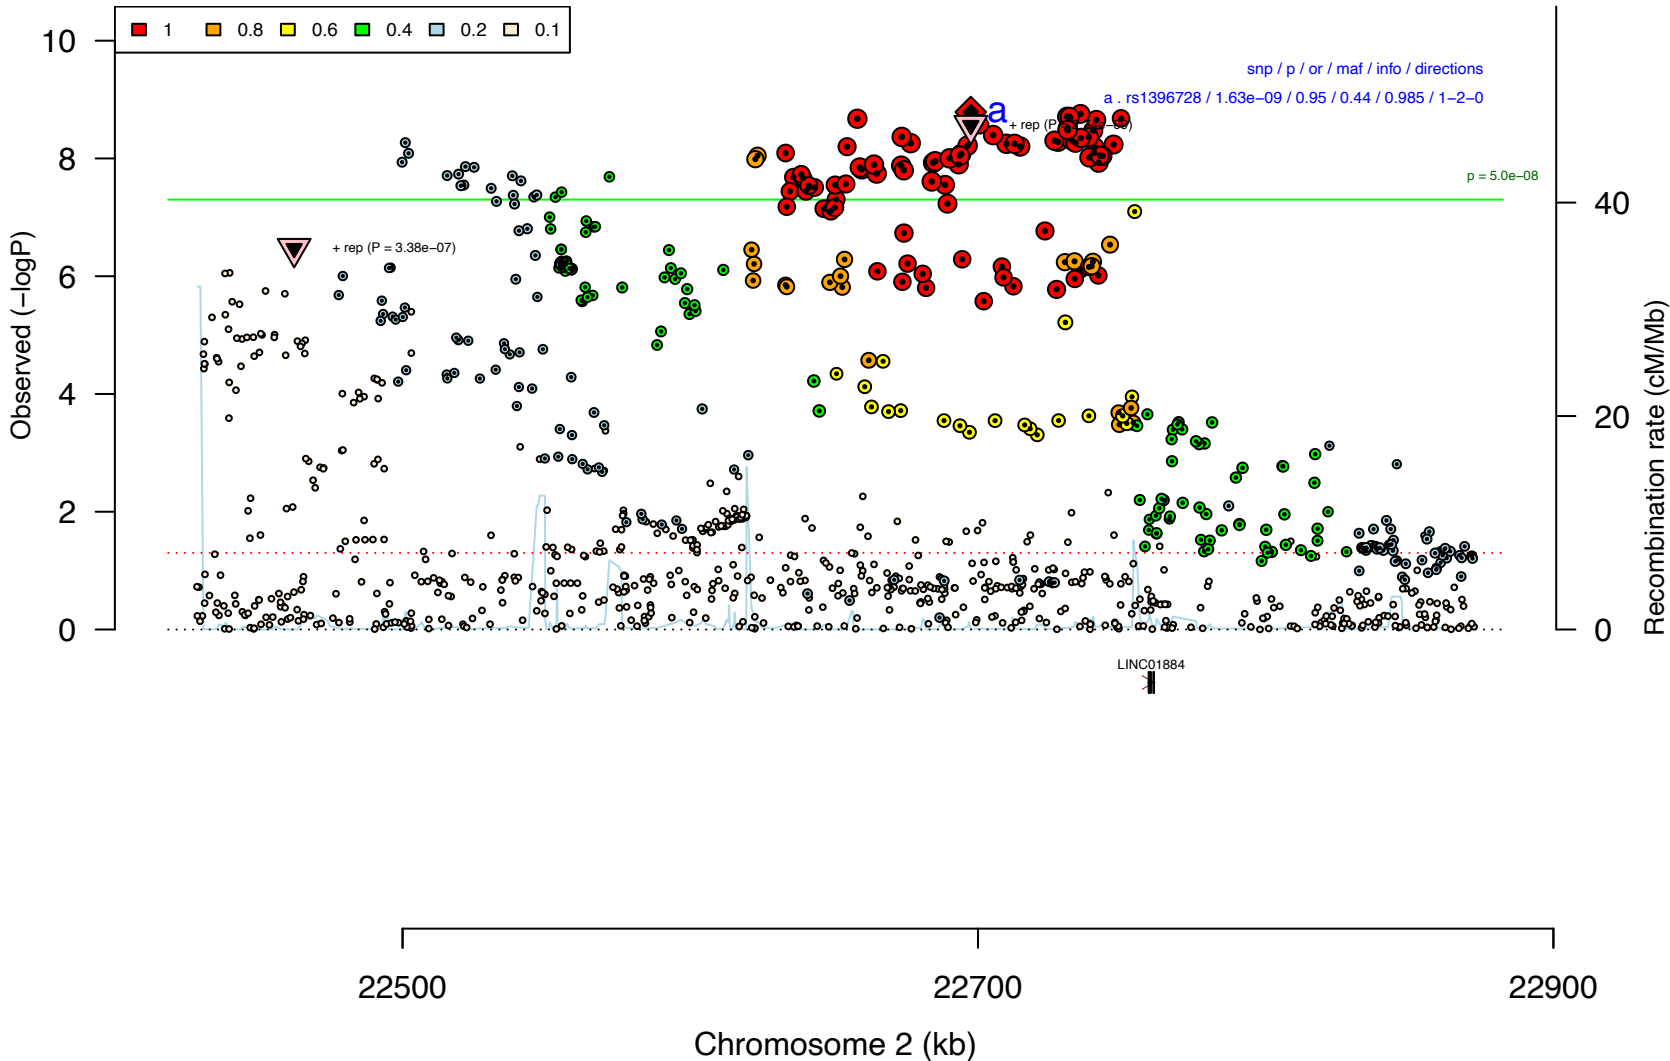

# PGC\_SCZ\_w3\_90\_0418b.166.chr16

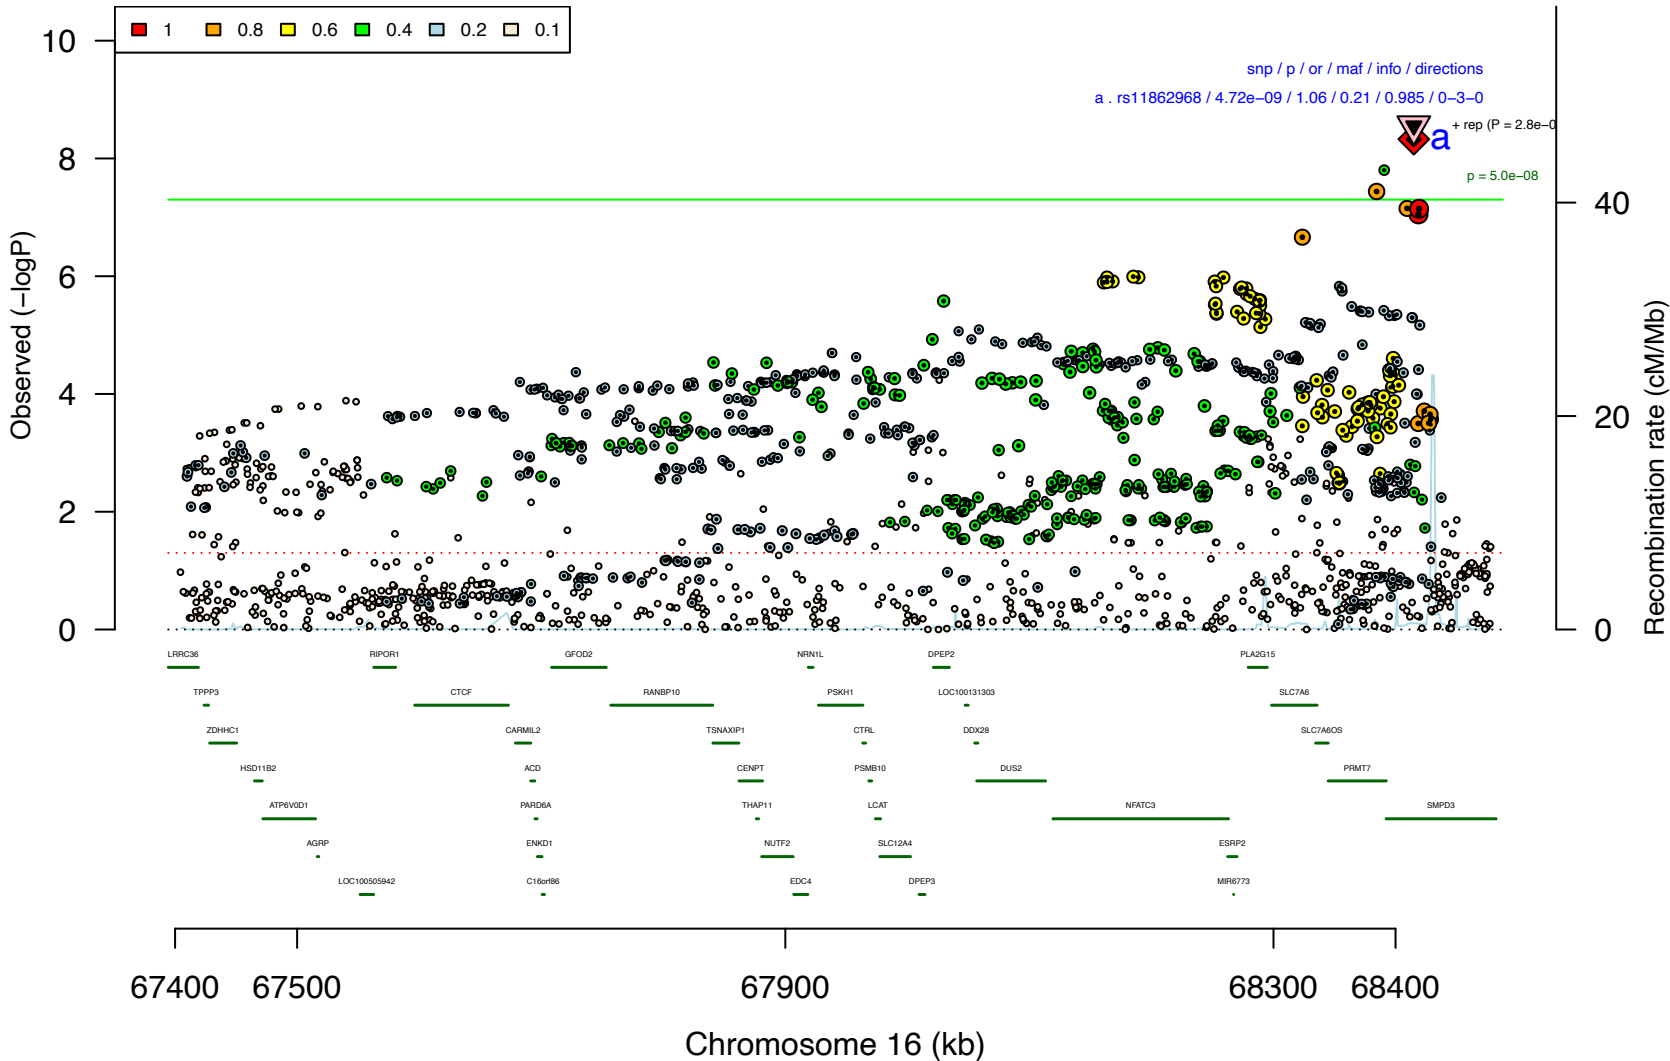

# PGC\_SCZ\_w3\_90\_0418b.167.chr4



snp / p / or / maf / info / directions

a . rs356183 / 5.15e-08 / 1.04 / 0.49 / 0.938 / 0-3-0

+ rep (P = 2.83e-09)

p = 5.0e-08

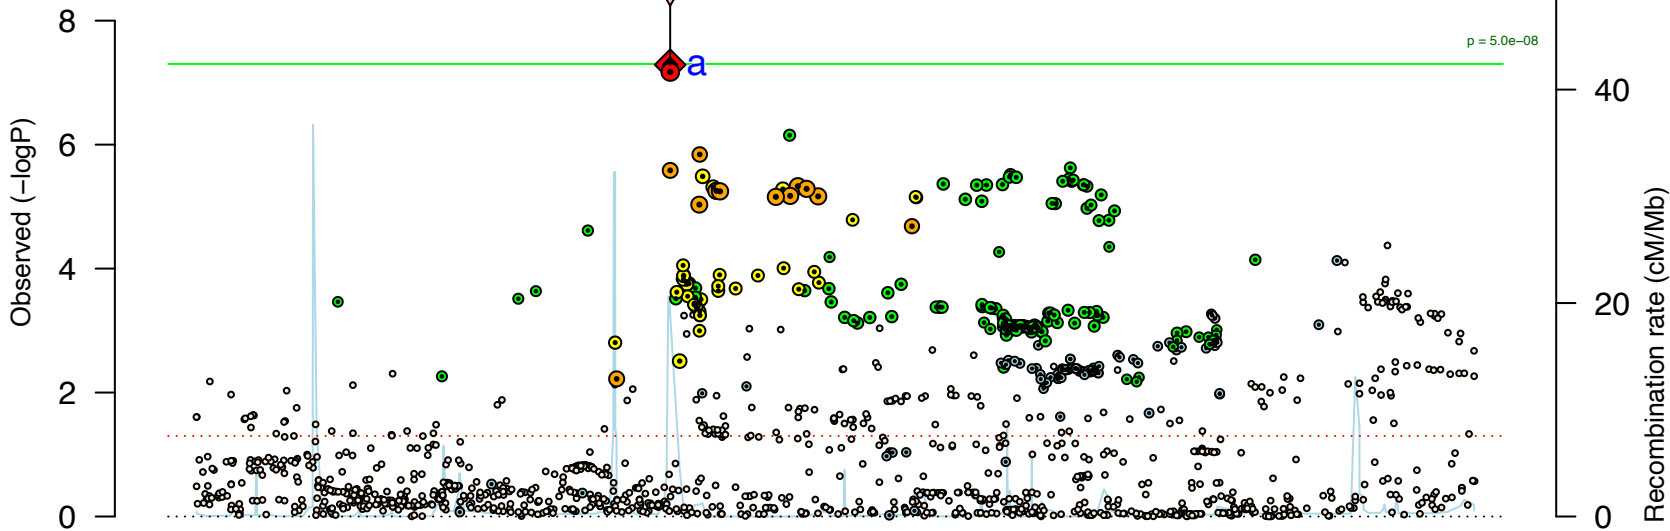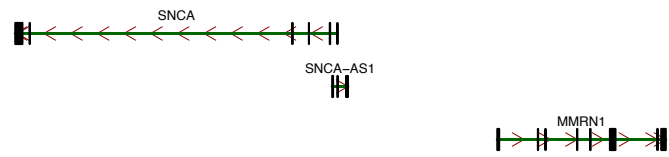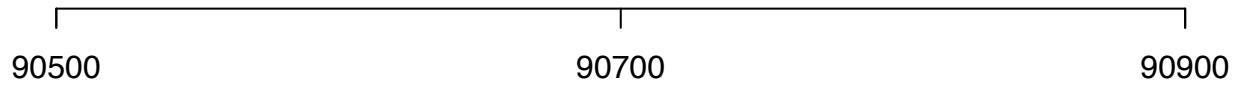

Chromosome 4 (kb)

# PGC\_SCZ\_w3\_90\_0418b.168.chr12

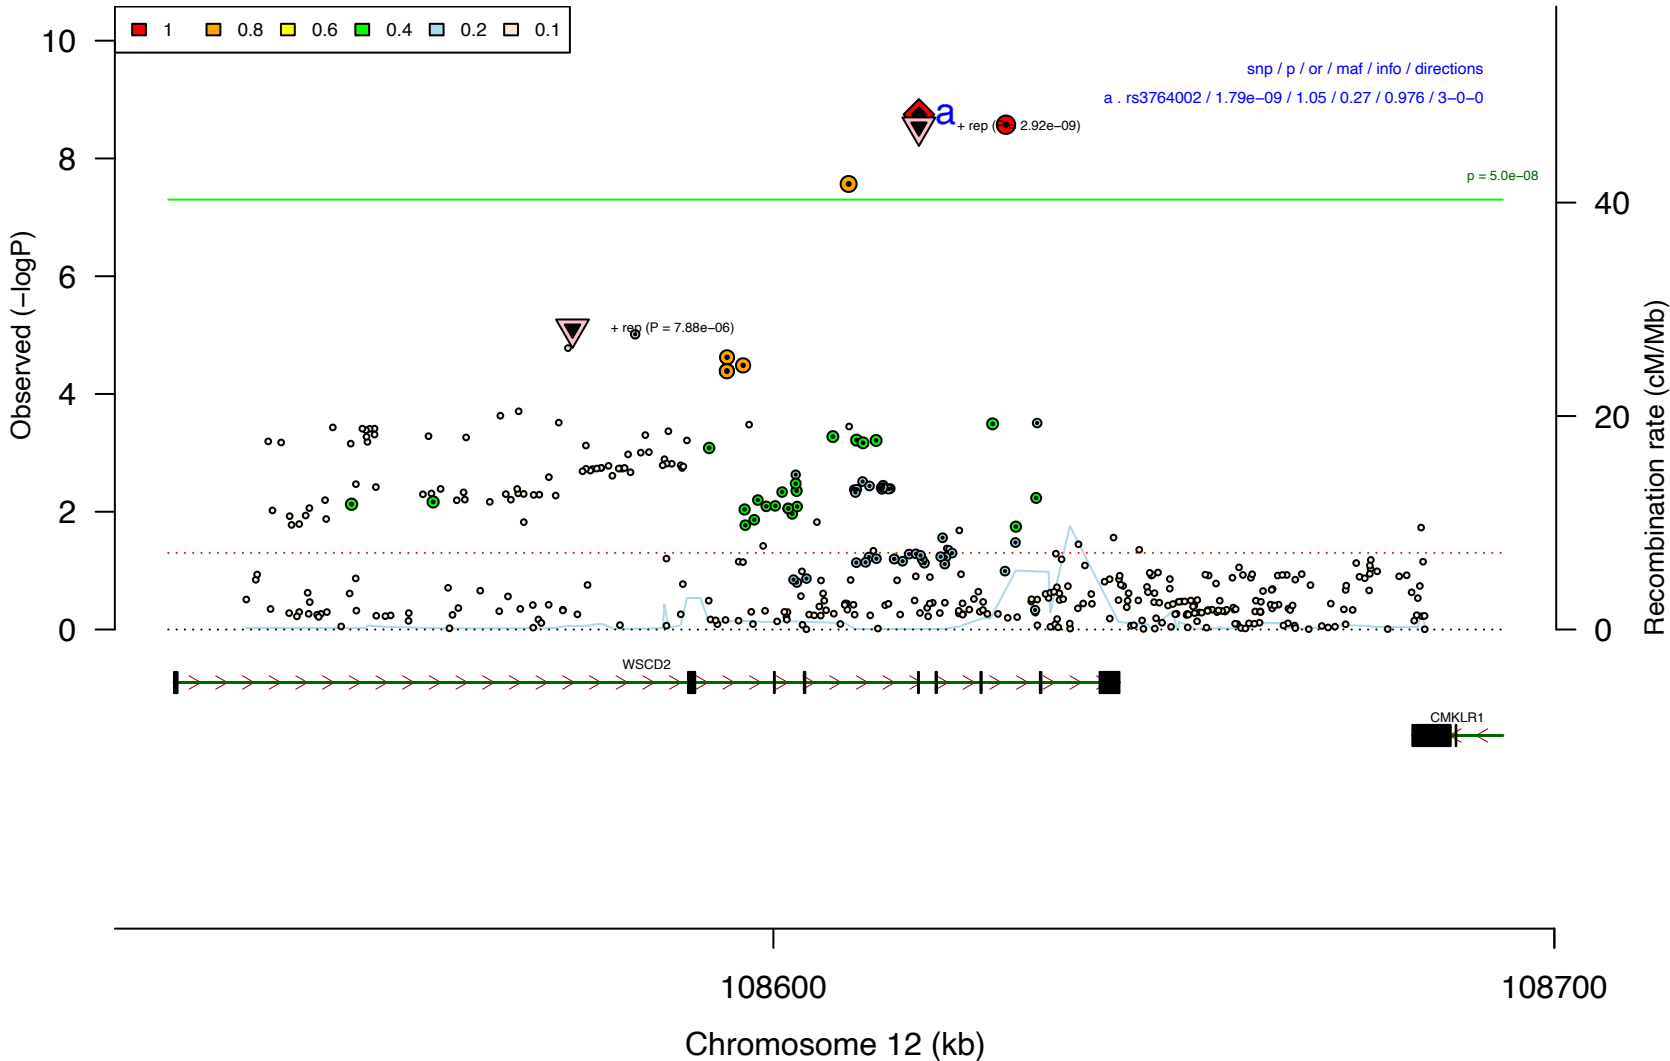

snp / p / or / maf / info / directions  
a . rs3764002 / 1.79e-09 / 1.05 / 0.27 / 0.976 / 3-0-0

WSCD2

CMKLR1

# PGC\_SCZ\_w3\_90\_0418b.169.chr7

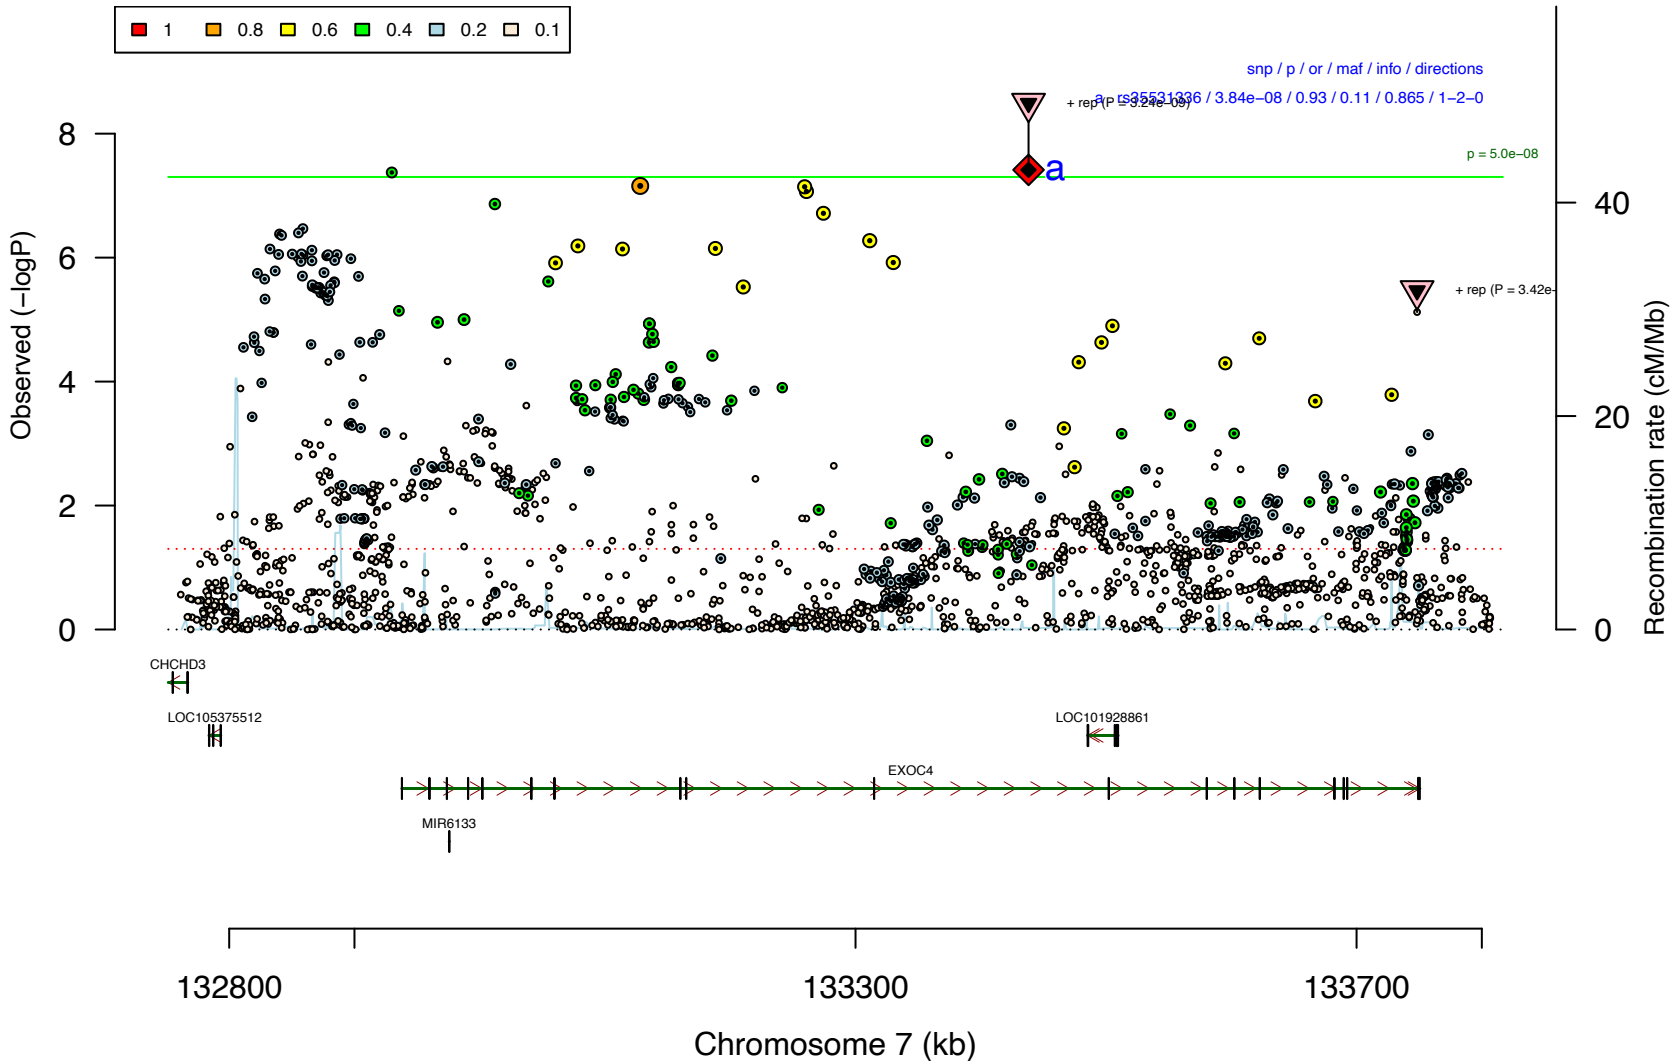

# PGC\_SCZ\_w3\_90\_0418b.170.chr12

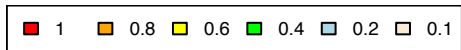

snp / p / or / maf / info / directions

a . rs1463209 / 2.53e-08 / 0.96 / 0.47 / 0.995 / 1-2-0

+ rep (P = 3.3e-09)

p = 5.0e-08

Observed (-logP)

Recombination rate (cM/Mb)

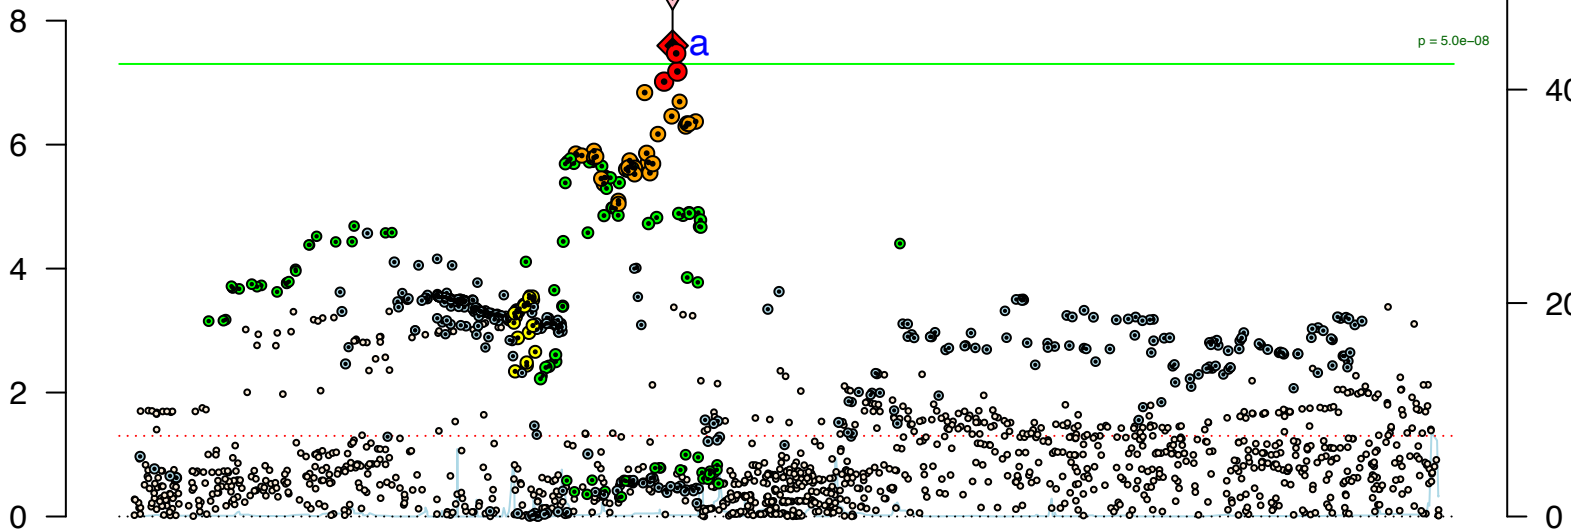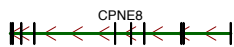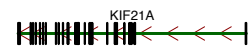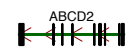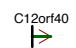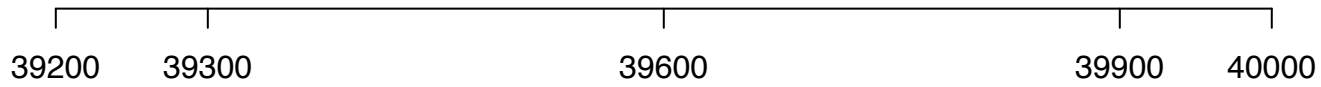

Chromosome 12 (kb)

# PGC\_SCZ\_w3\_90\_0418b.171.chr5

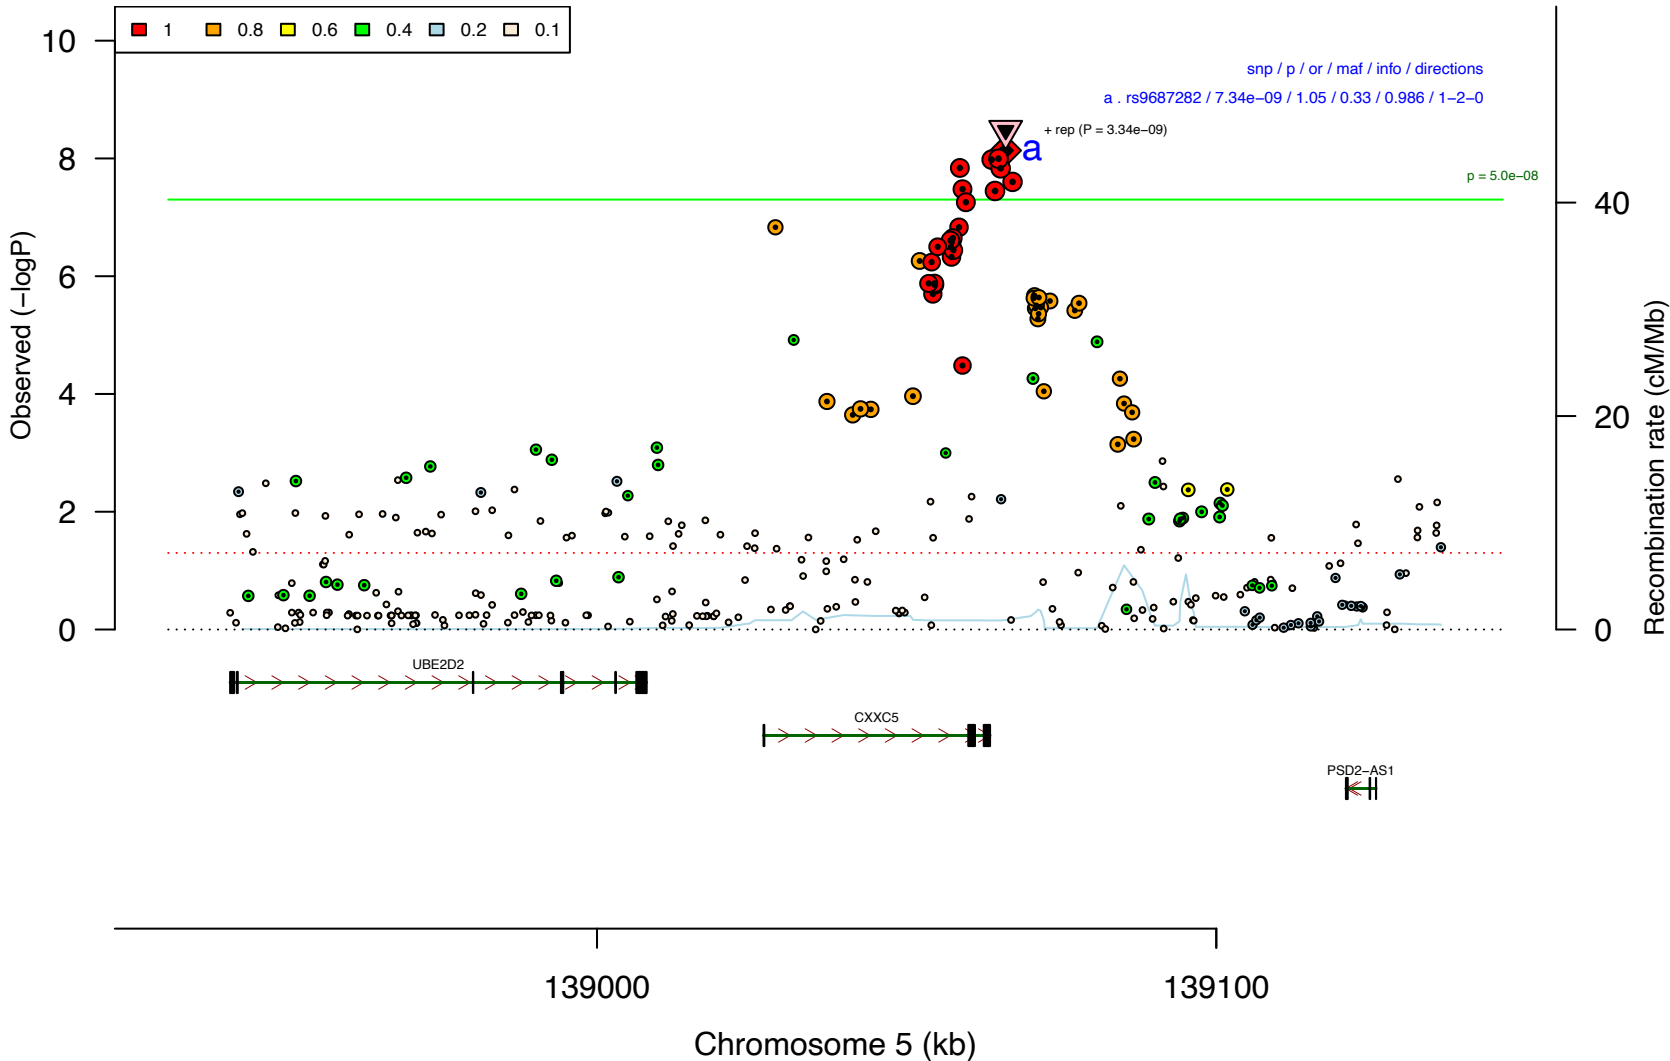

# PGC\_SCZ\_w3\_90\_0418b.172.chr14

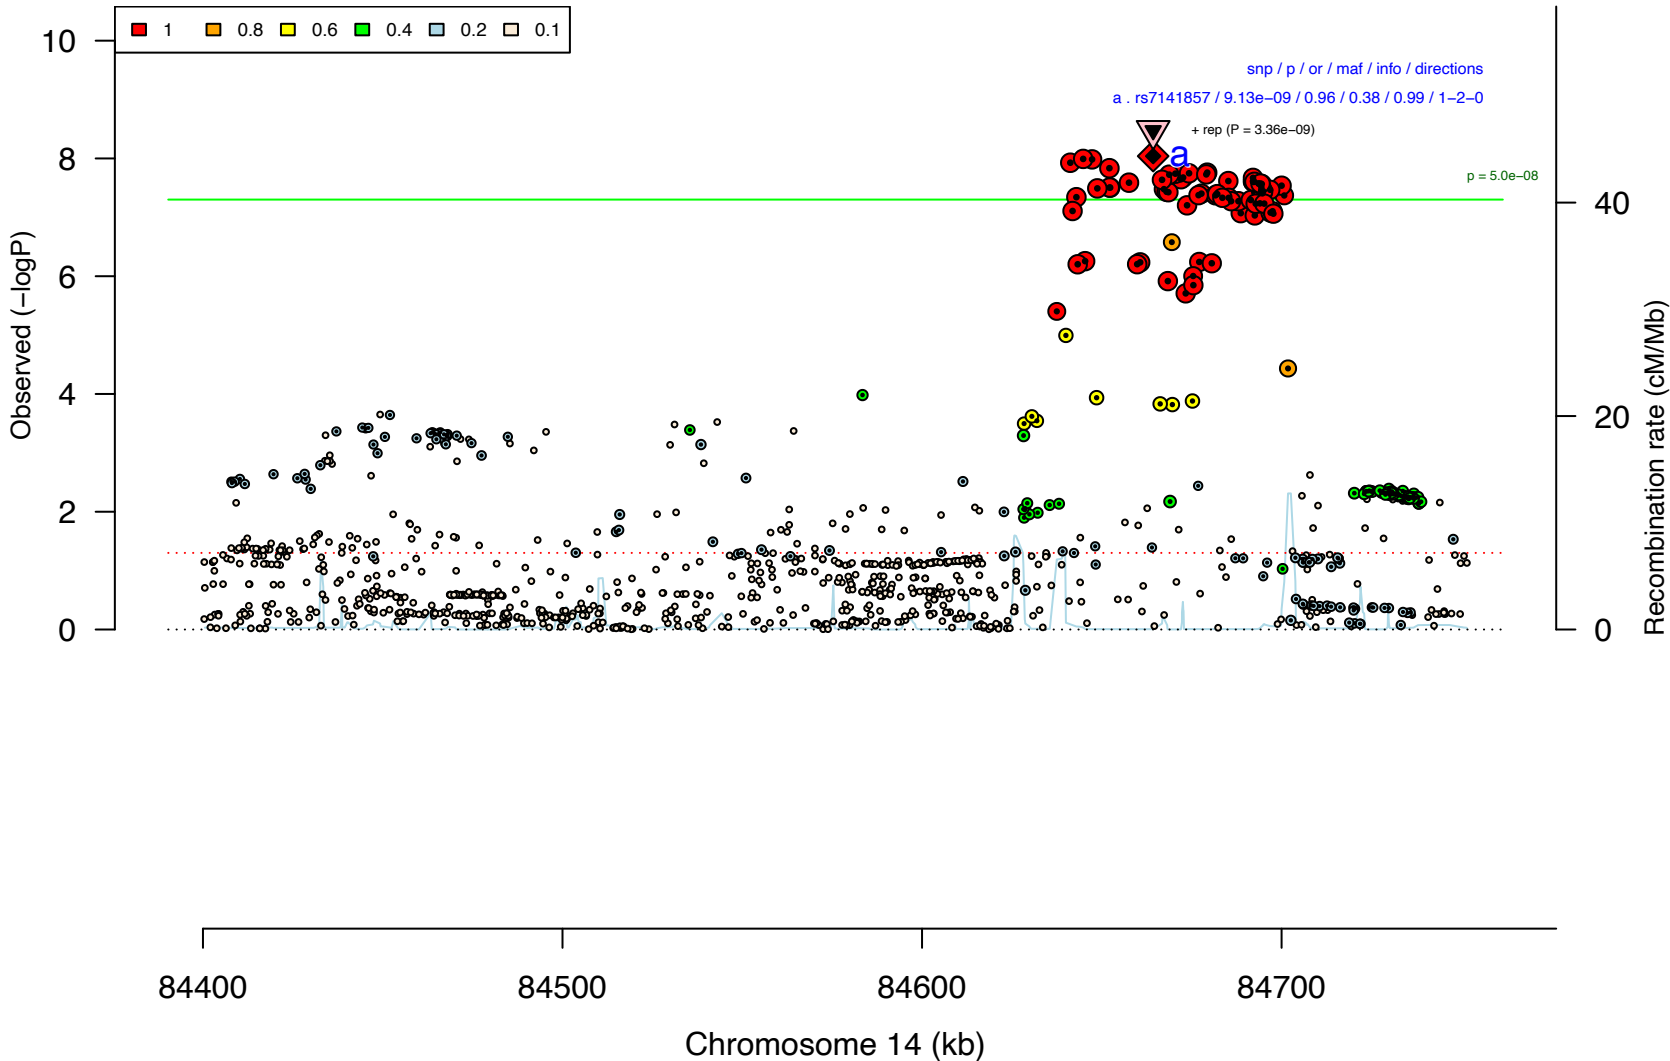



# PGC\_SCZ\_w3\_90\_0418b.173.chr3

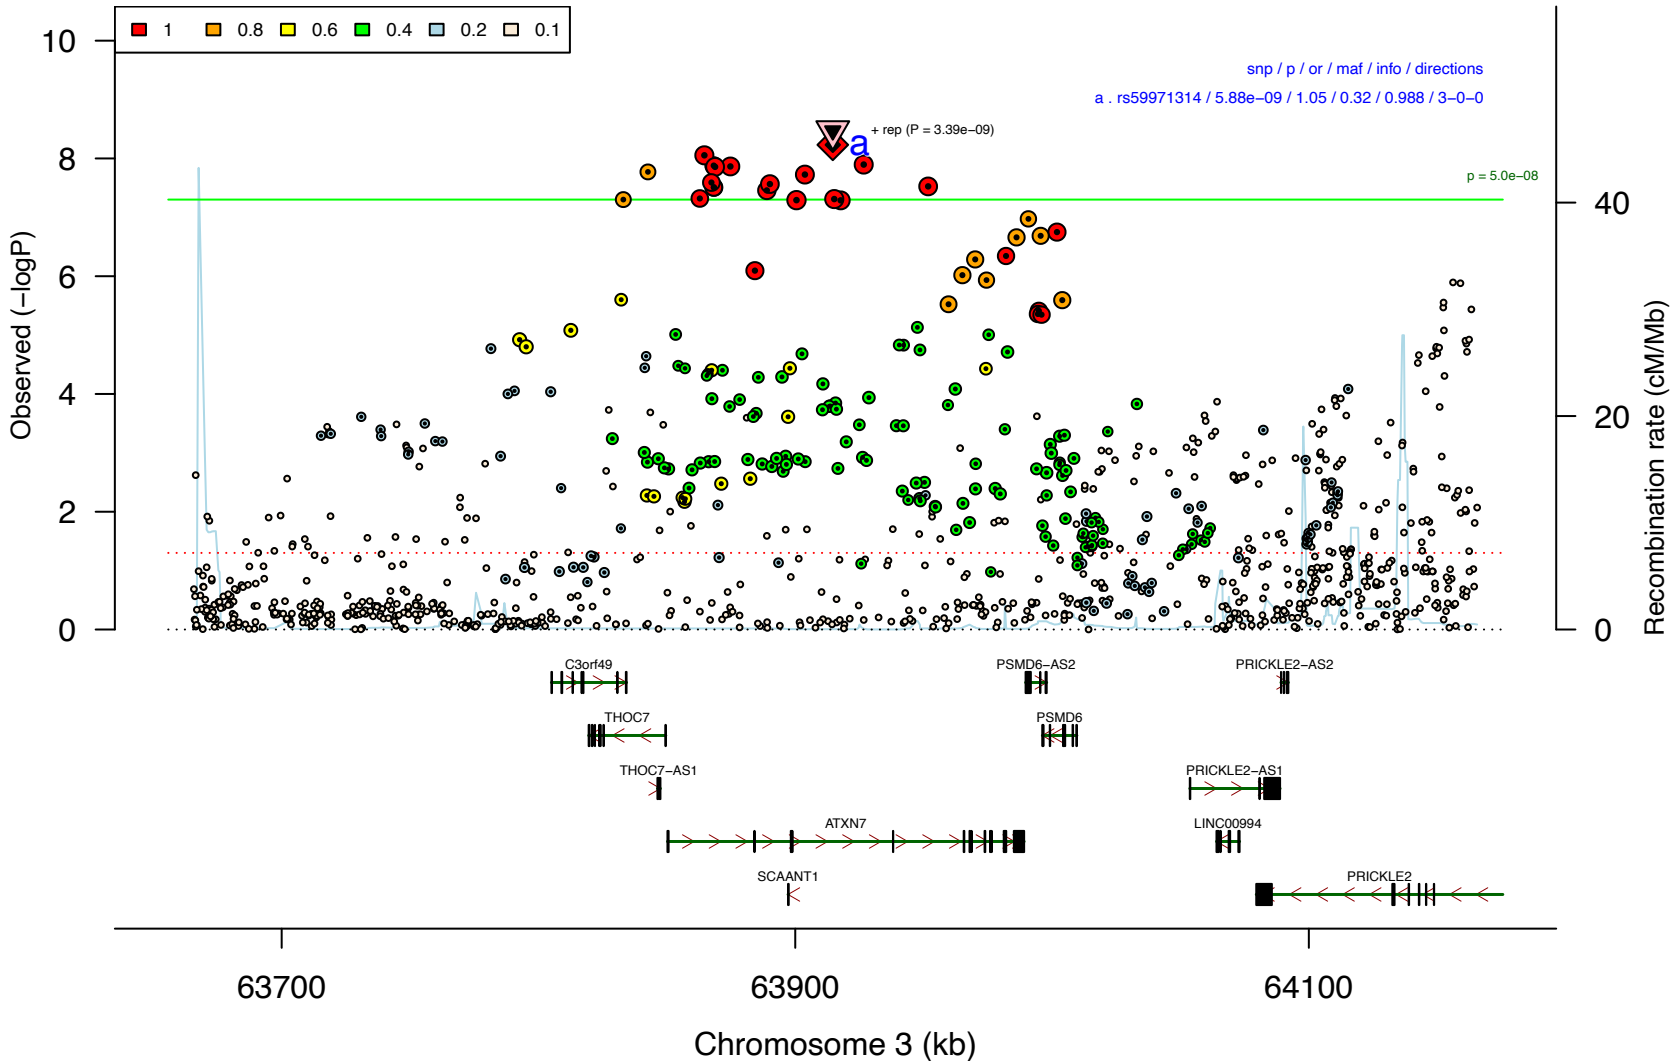

# PGC\_SCZ\_w3\_90\_0418b.174.chr4

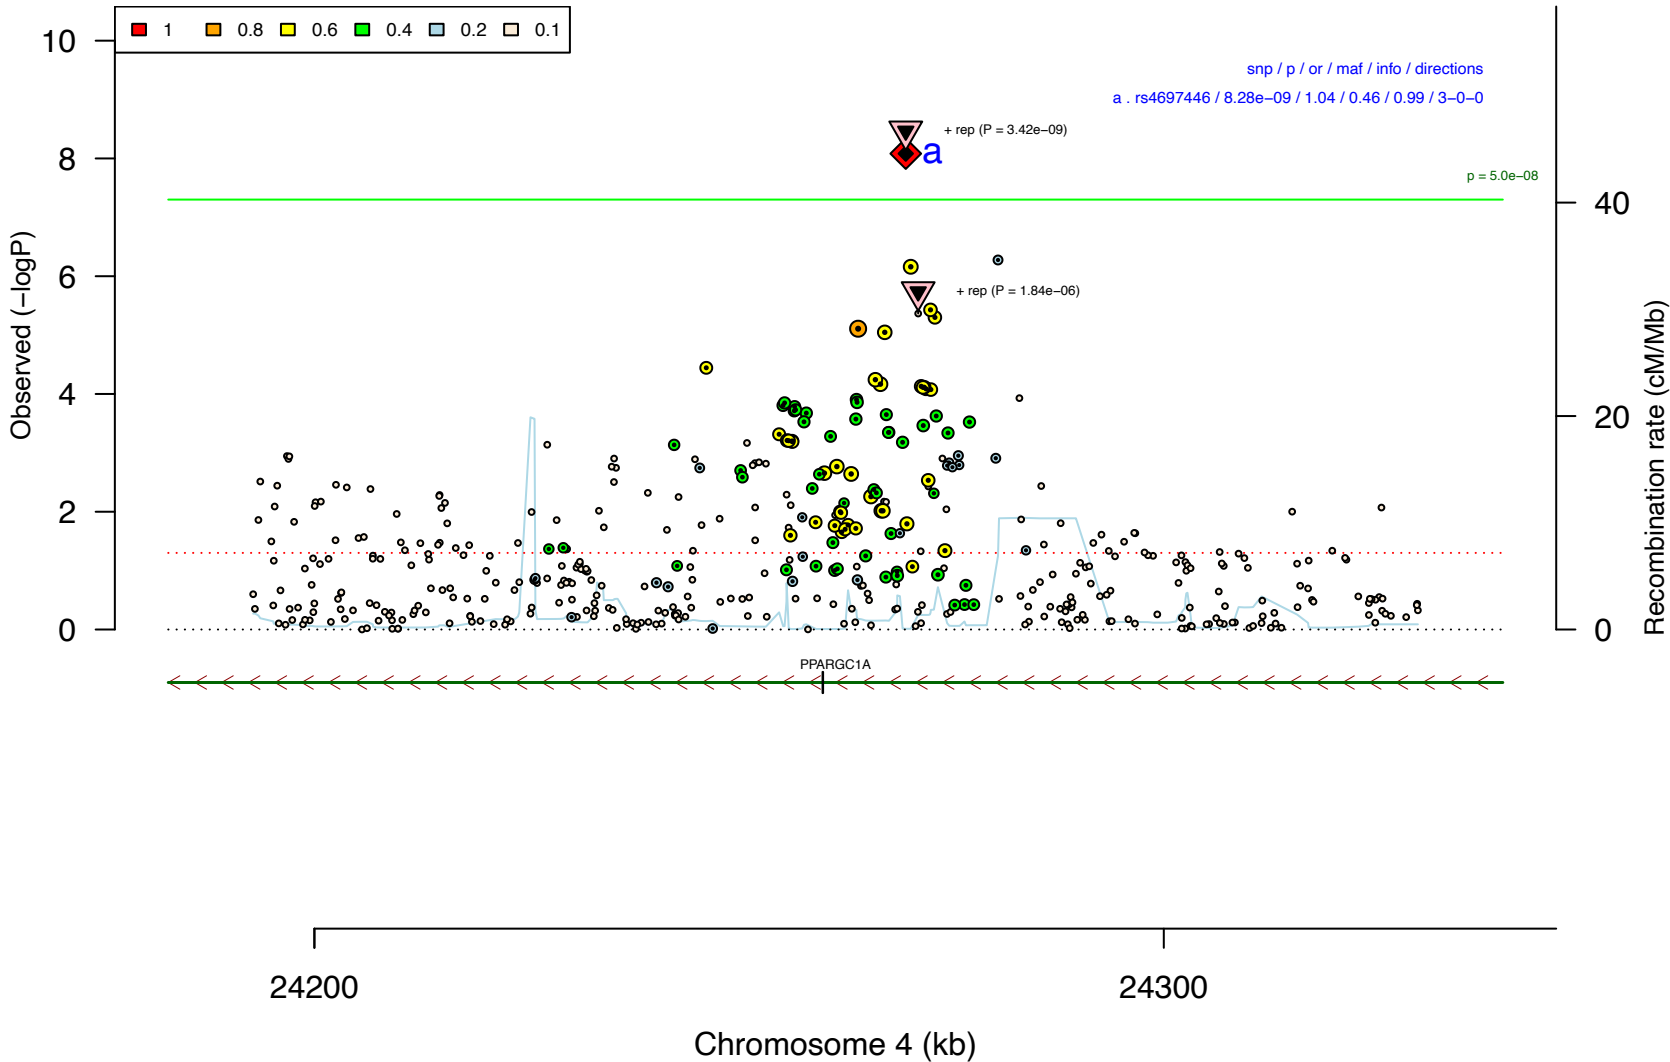

# PGC\_SCZ\_w3\_90\_0418b.175.chr2

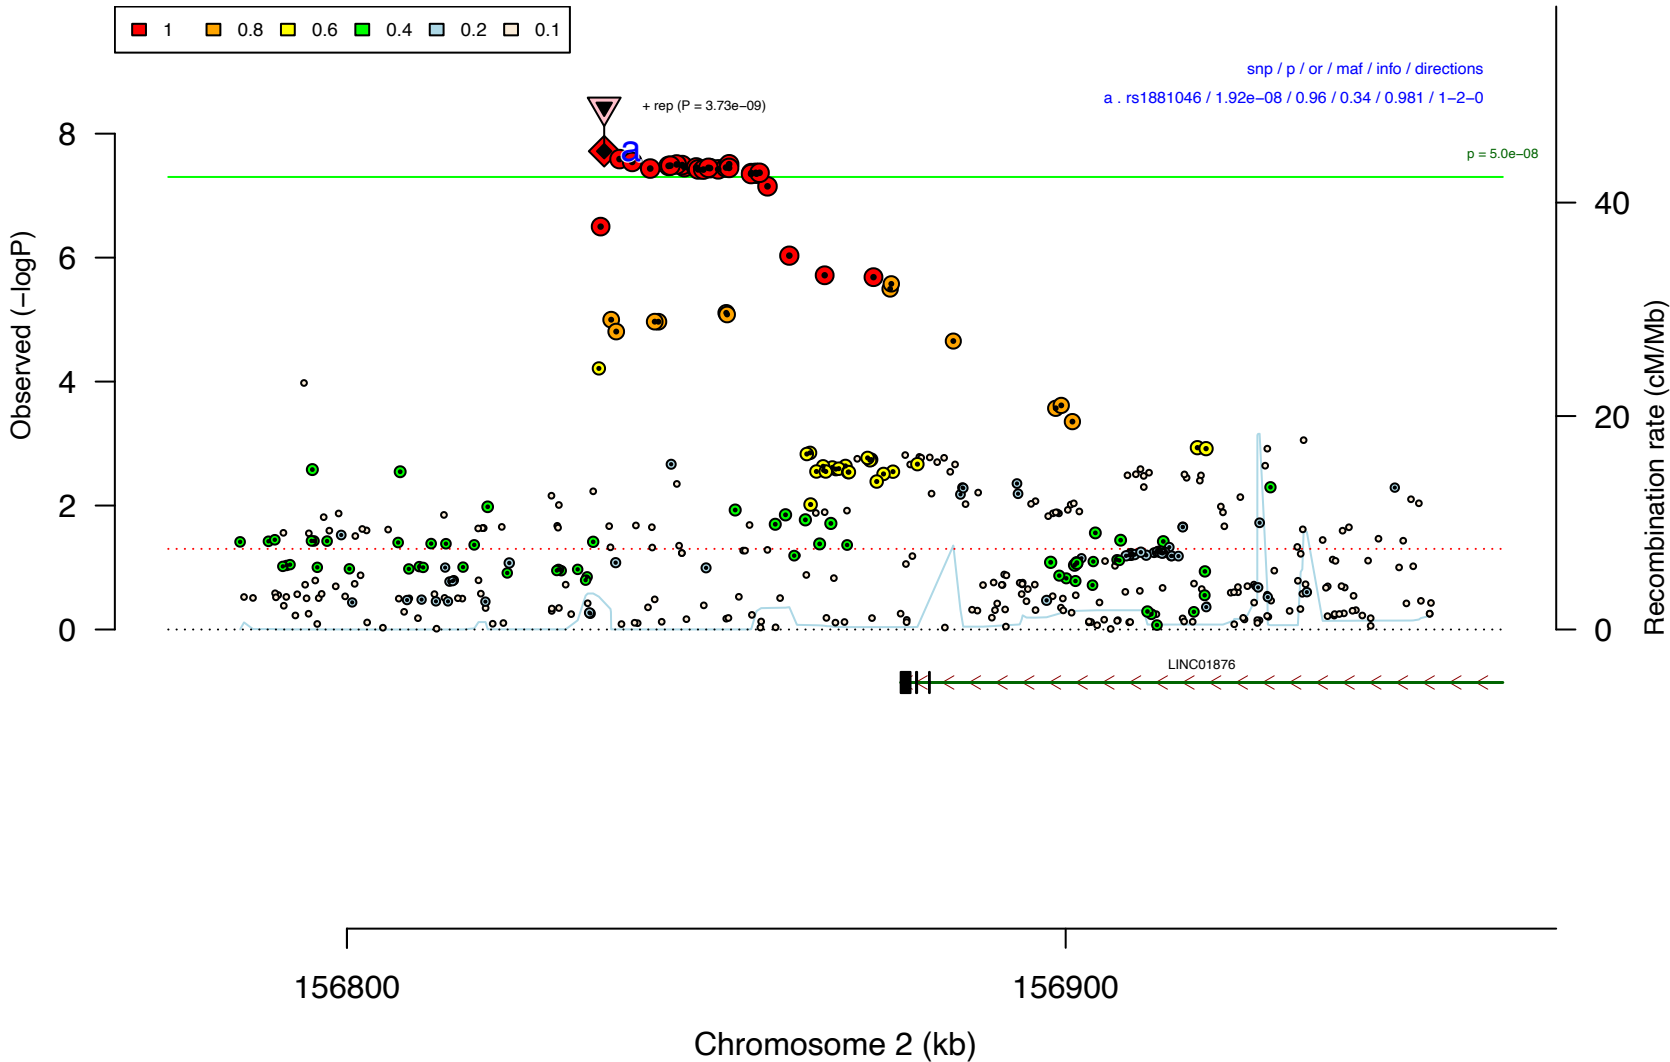

# PGC\_SCZ\_w3\_90\_0418b.176.chr8

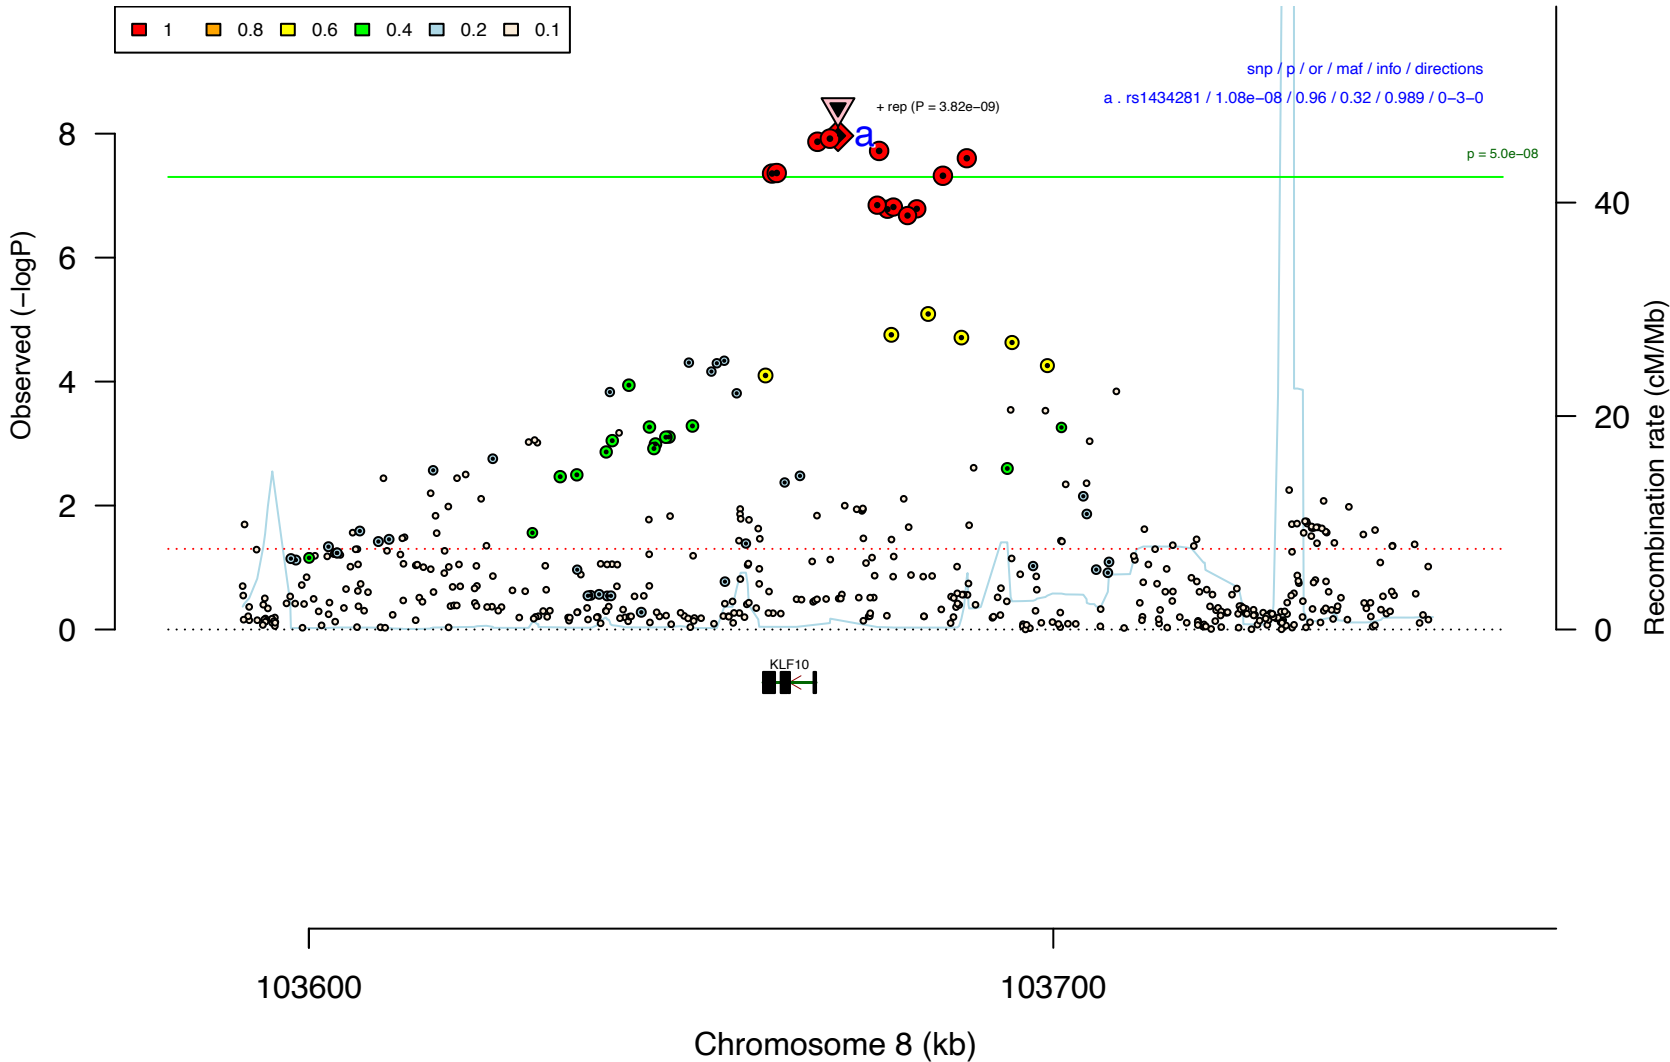

# PGC\_SCZ\_w3\_90\_0418b.177.chr1

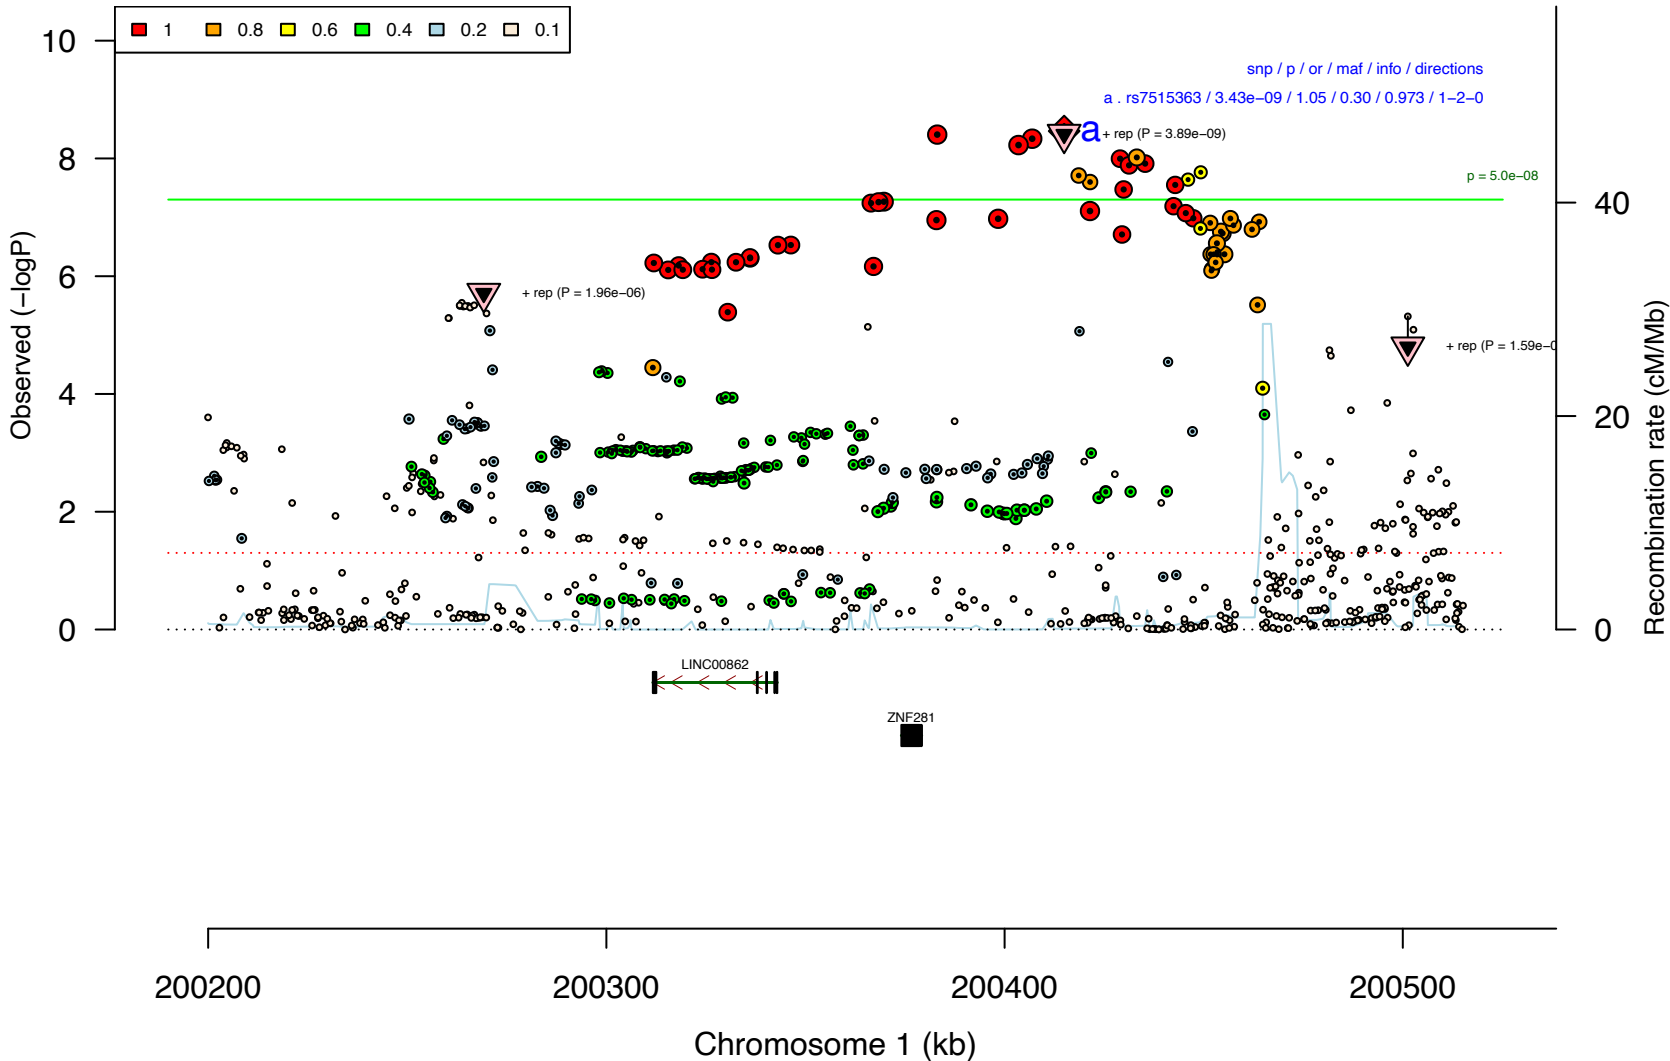

# PGC\_SCZ\_w3\_90\_0418b.178.chr19

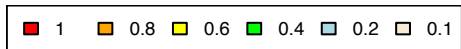

snp / p / or / maf / info / directions

a . rs3810450 / 1.37e-08 / 0.91 / 0.06 / 0.964 / 2-1-0

+ rep (P = 4.25e-09)  
a

p = 5.0e-08

Observed (-logP)

Recombination rate (cM/Mb)

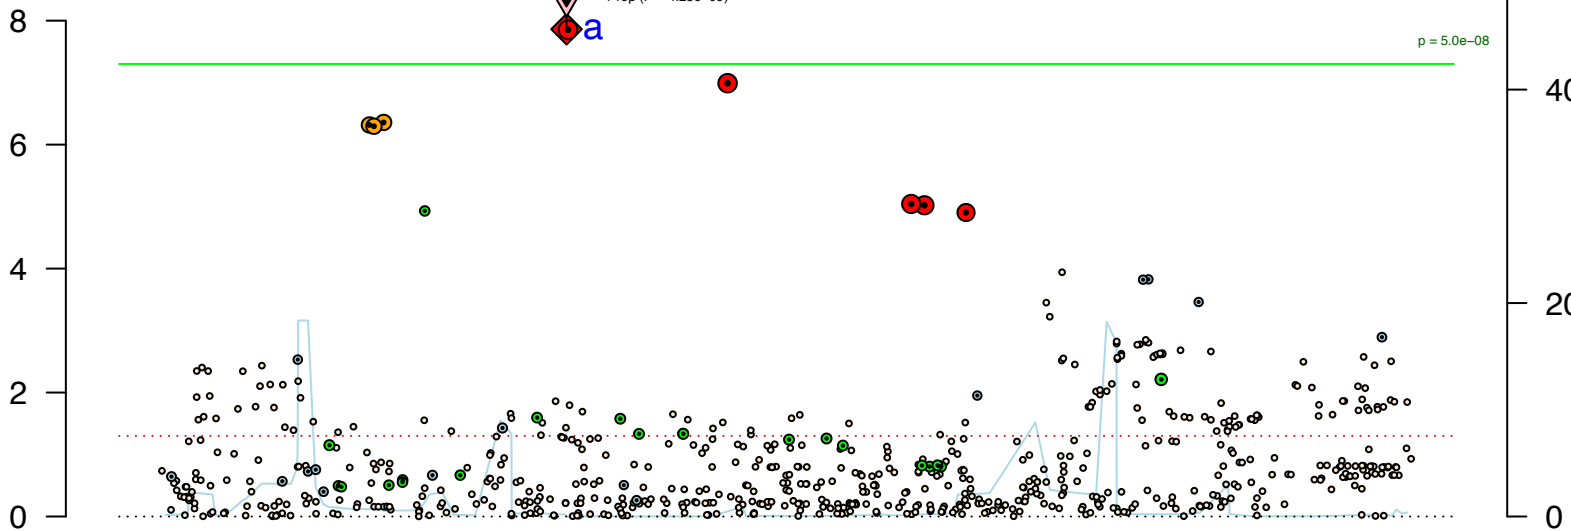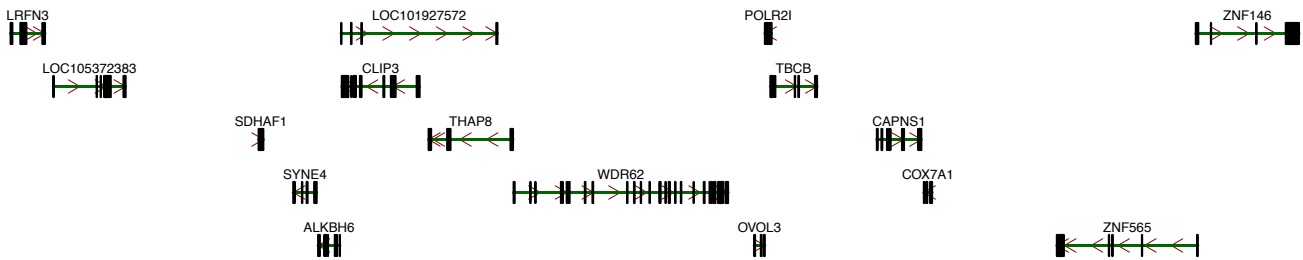

36500 36600 36700

Chromosome 19 (kb)

# PGC\_SCZ\_w3\_90\_0418b.179.chr8

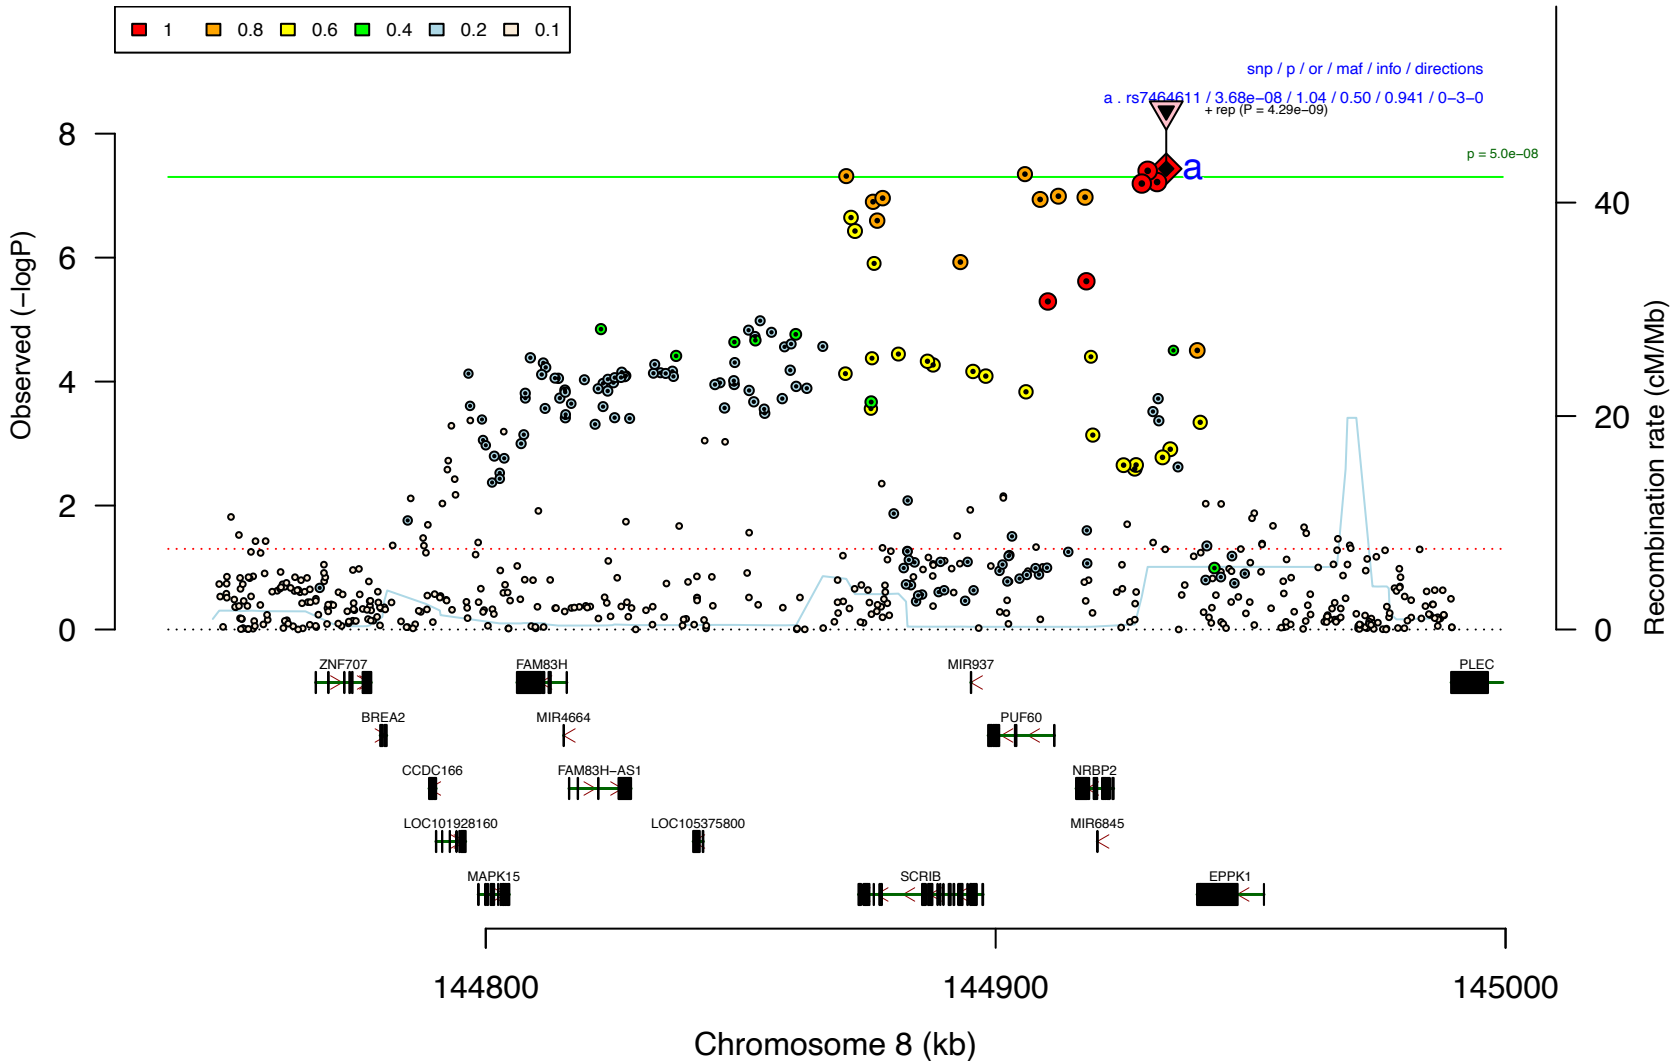

# PGC\_SCZ\_w3\_90\_0418b.180.chr2

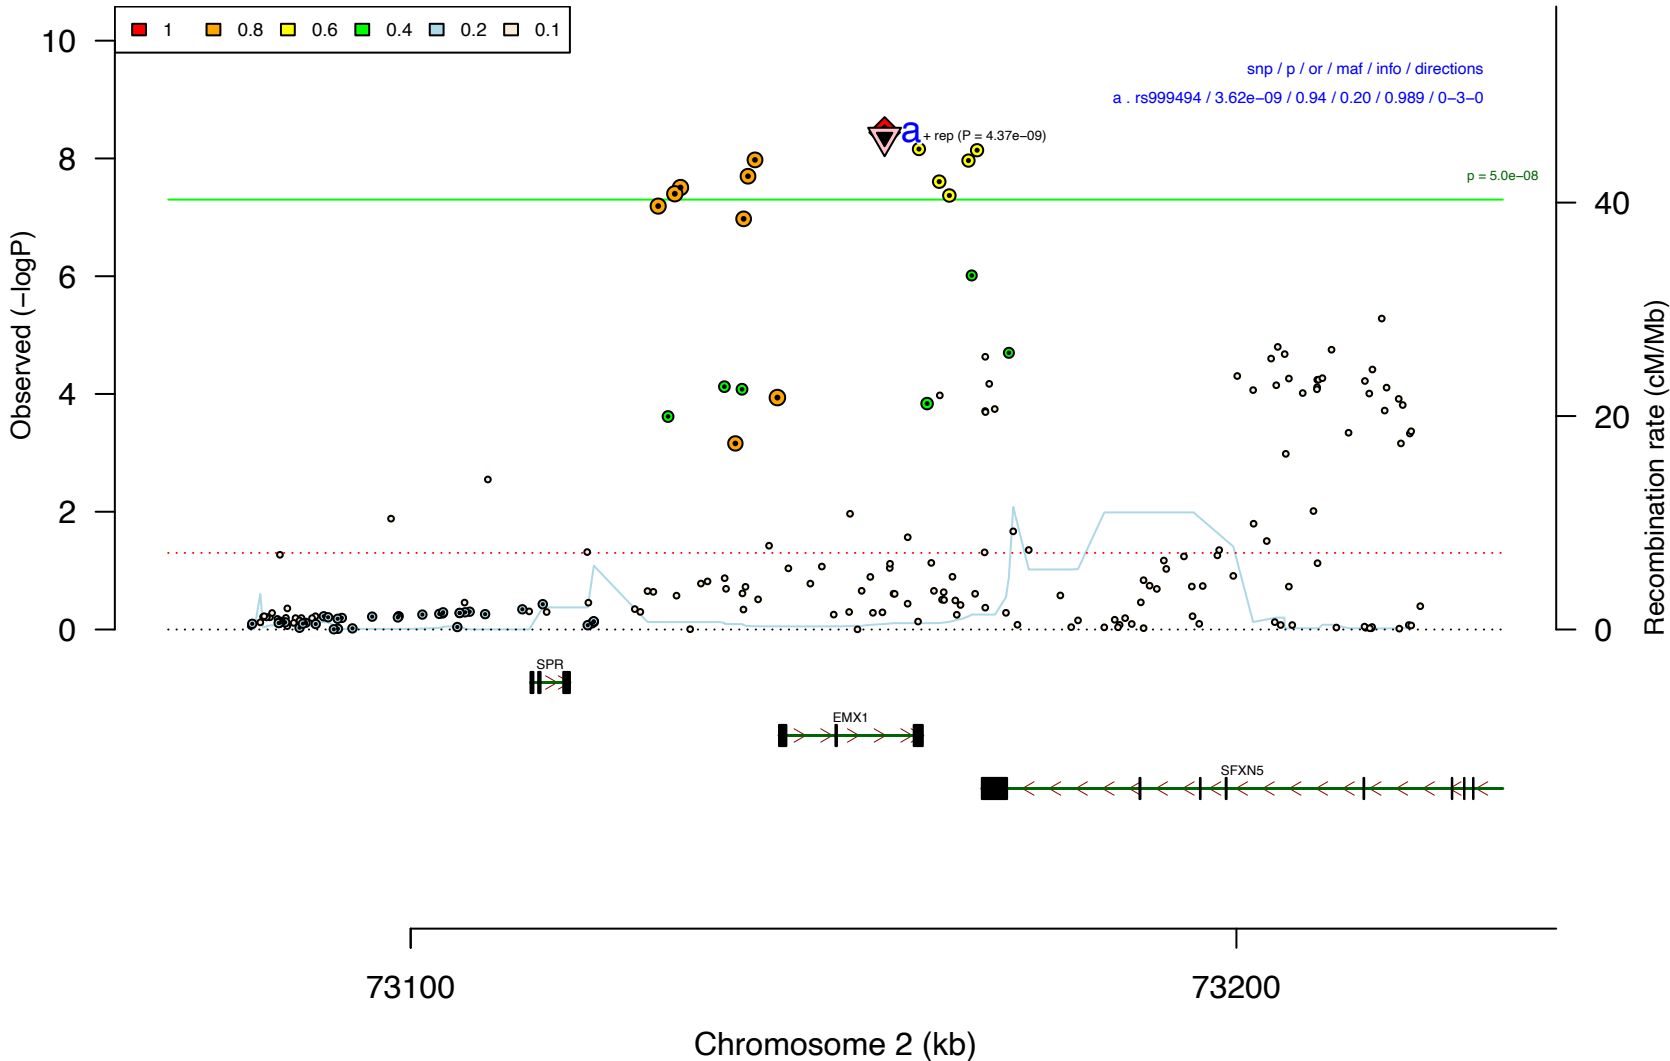



# PGC\_SCZ\_w3\_90\_0418b.181.chr15

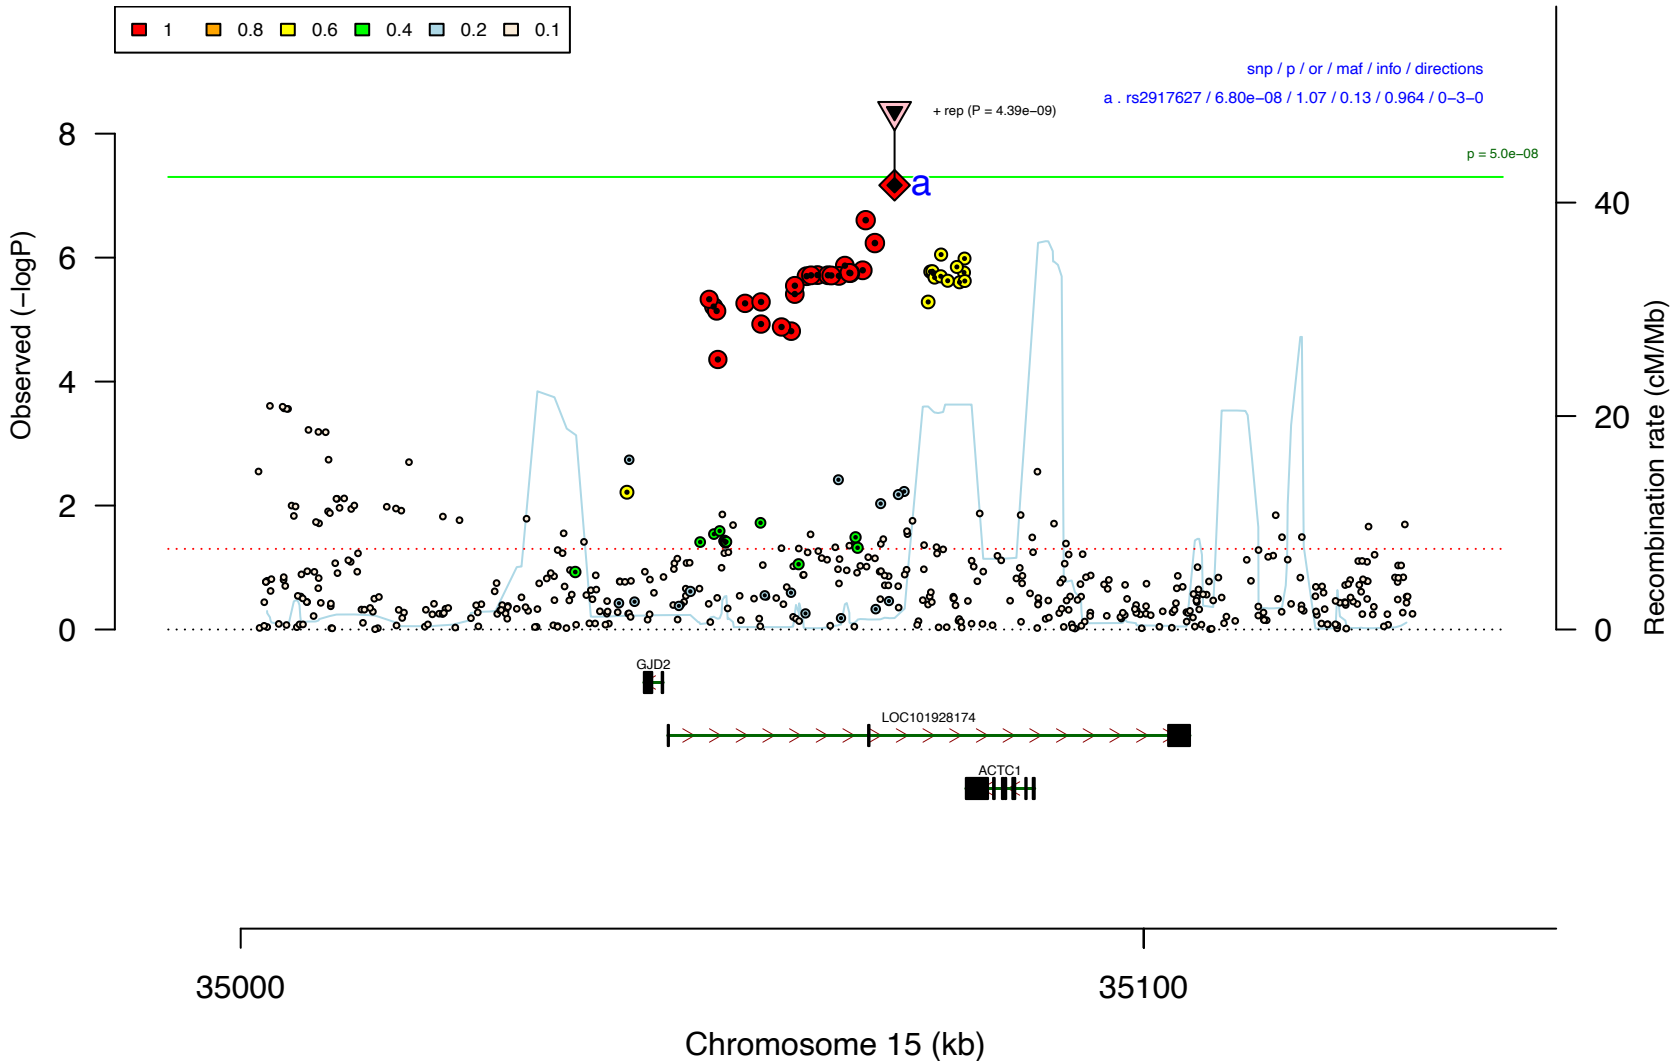

# PGC\_SCZ\_w3\_90\_0418b.182.chr15

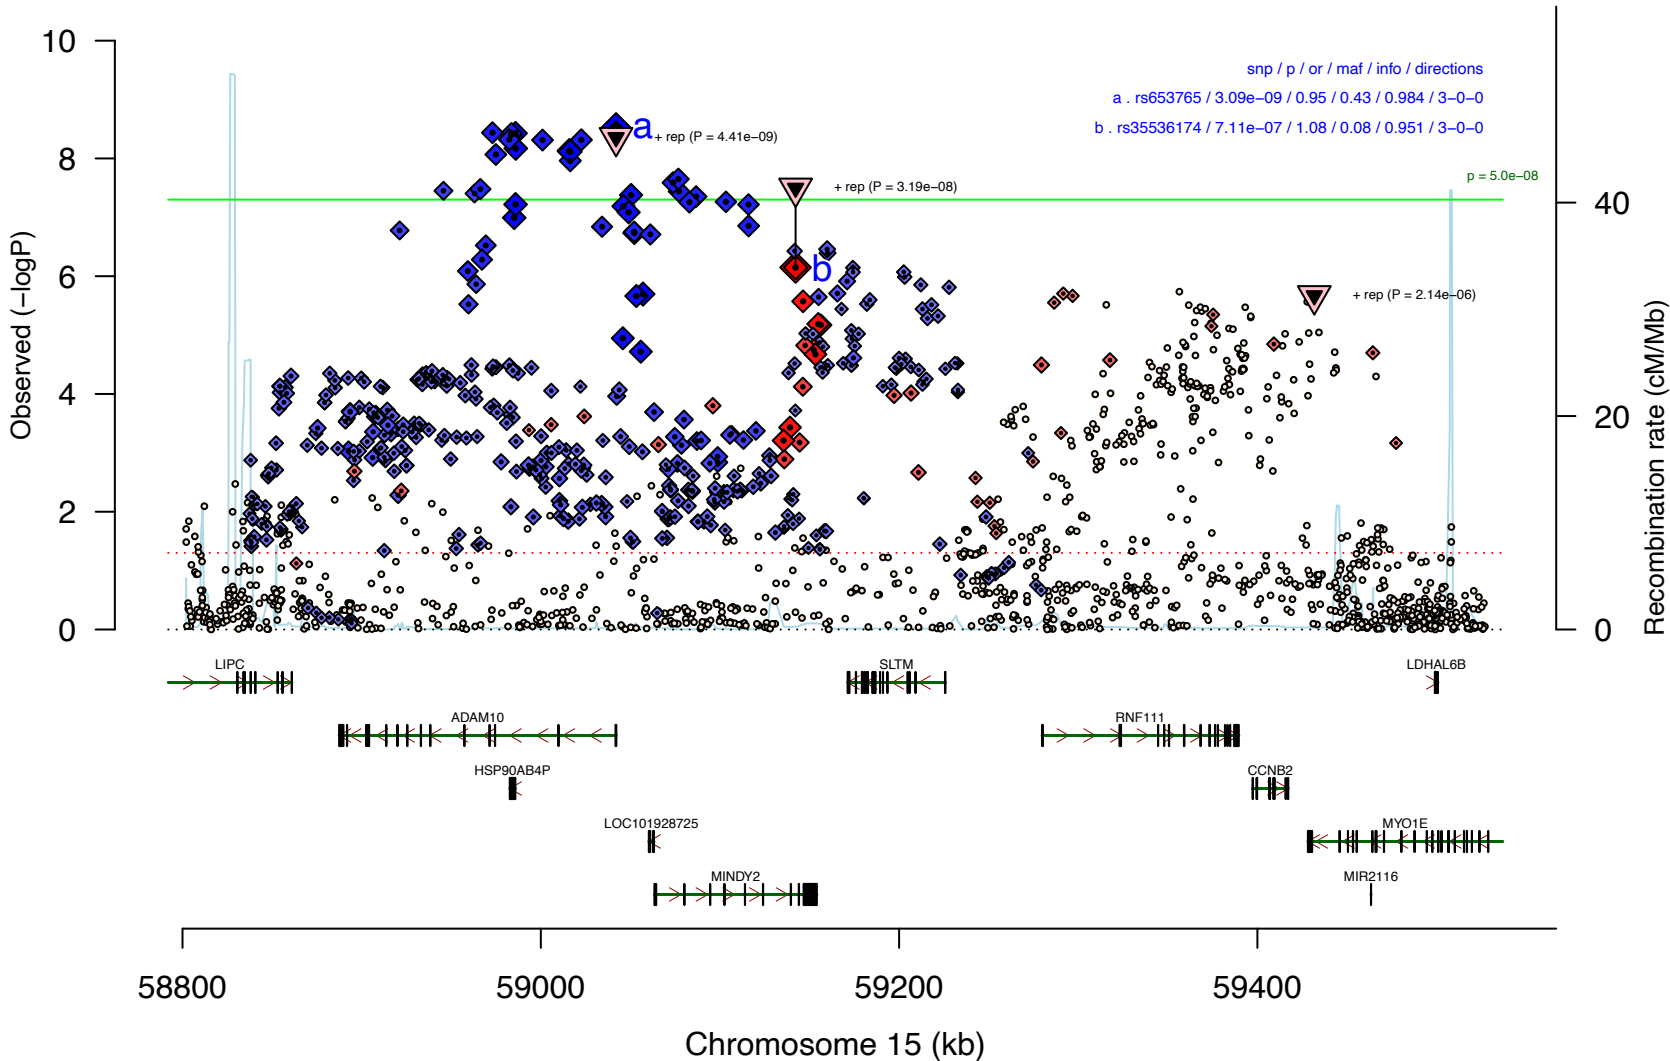

# PGC\_SCZ\_w3\_90\_0418b.183.chr9

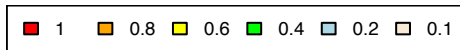

snp / p / or / maf / info / directions

a . rs2381411 / 2.42e-08 / 1.04 / 0.40 / 0.957 / 1-2-0

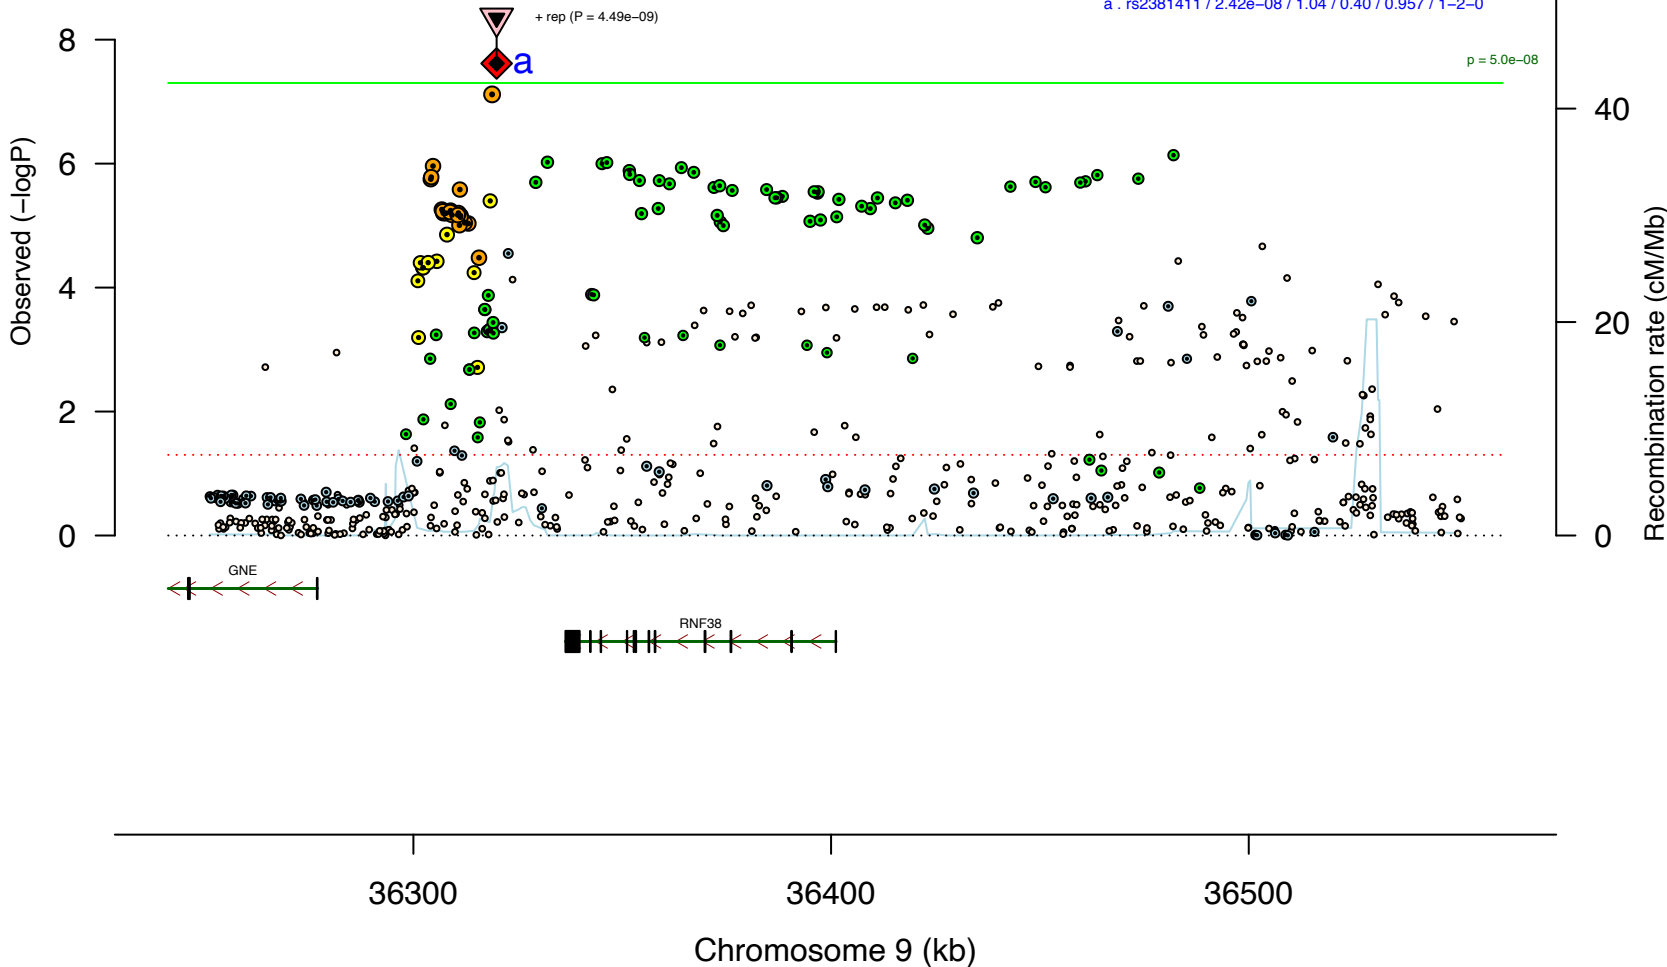

# PGC\_SCZ\_w3\_90\_0418b.184.chr9



snp / p / or / maf / info / directions

a . rs498591 / 1.36e-08 / 1.06 / 0.14 / 0.983 / 1-2-0

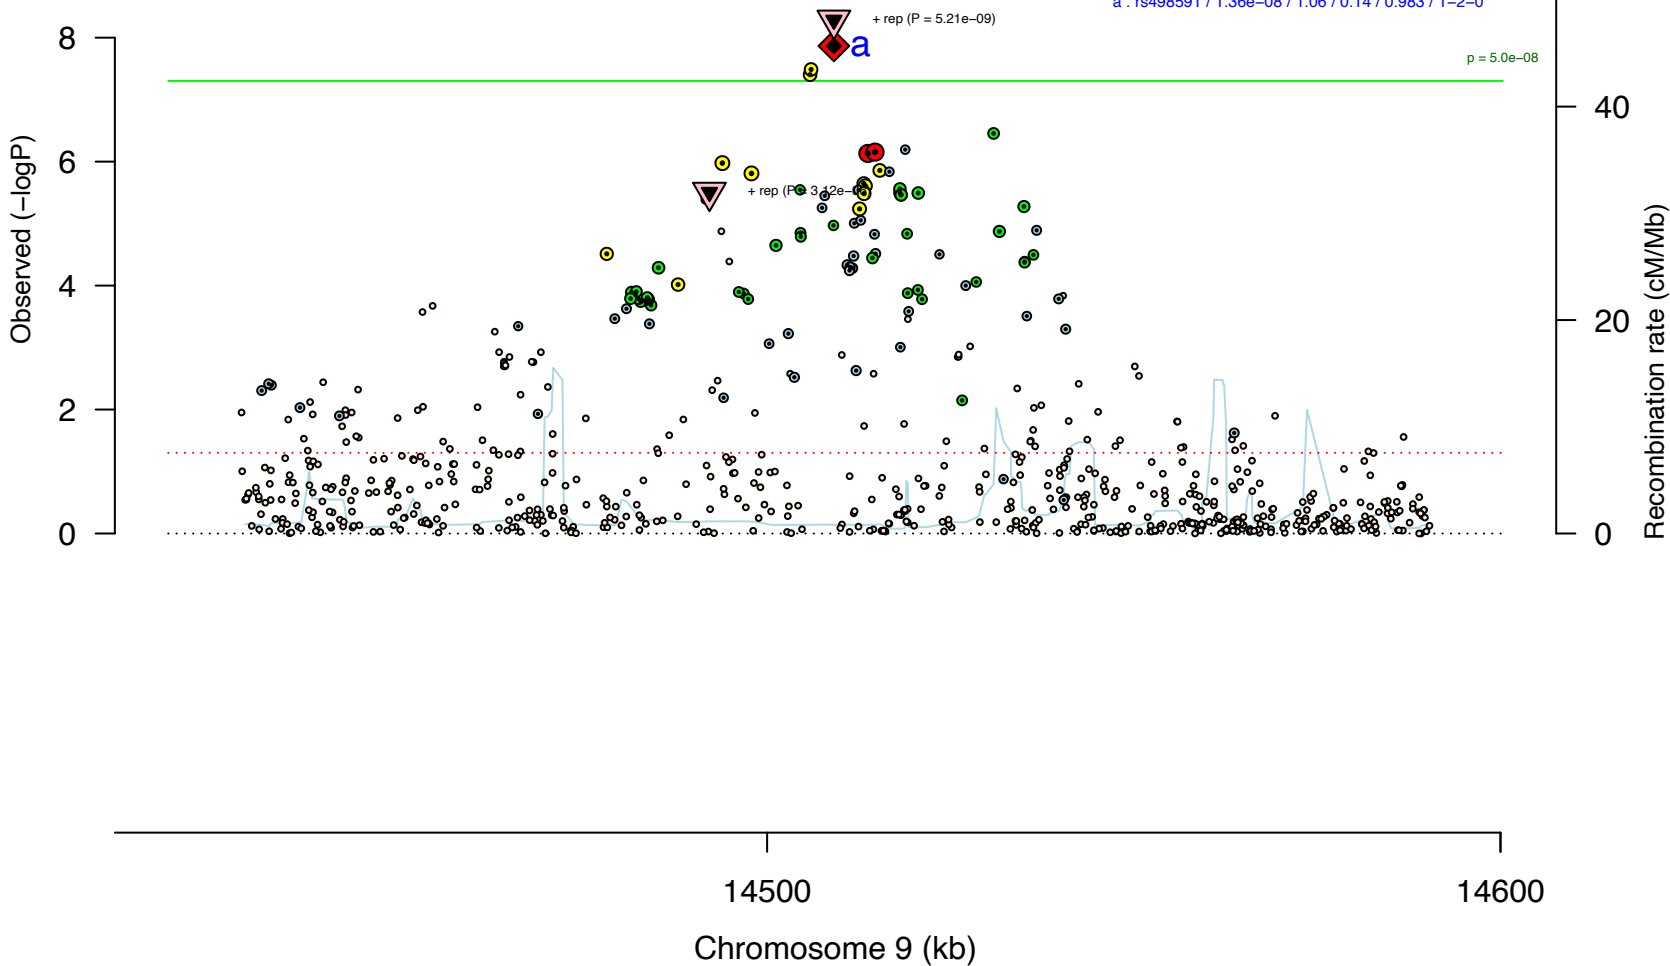

# PGC\_SCZ\_w3\_90\_0418b.185.chr19

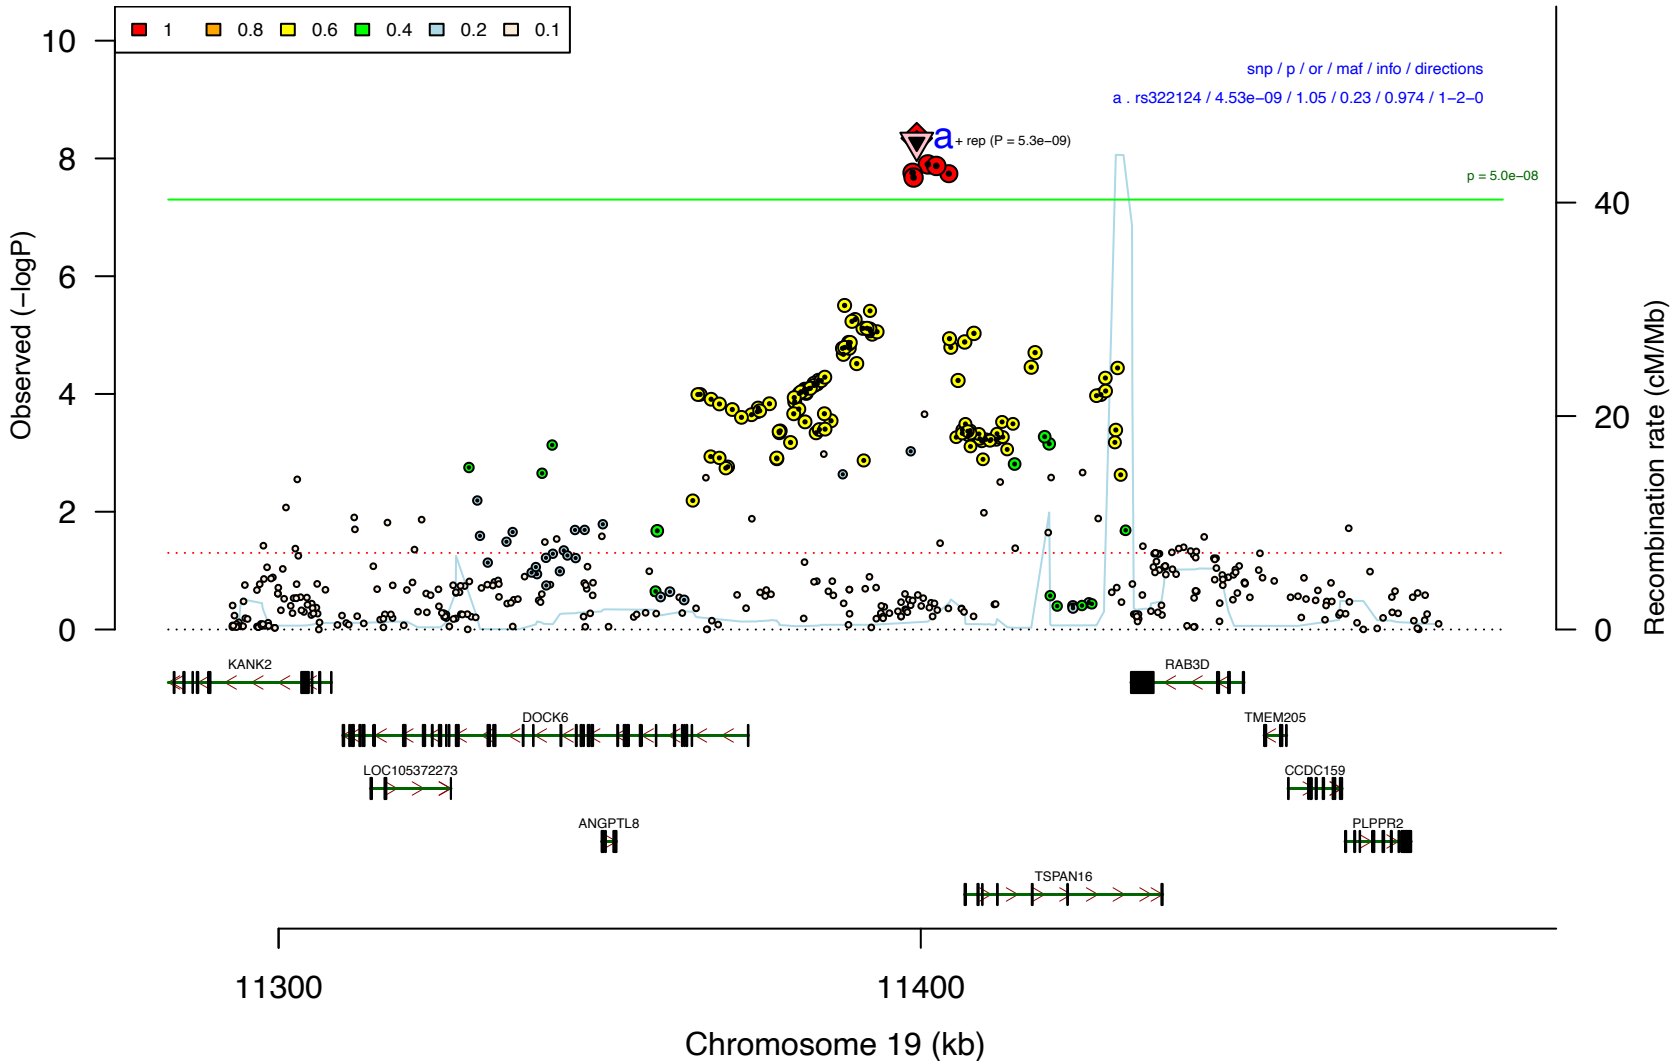

# PGC\_SCZ\_w3\_90\_0418b.186.chr19

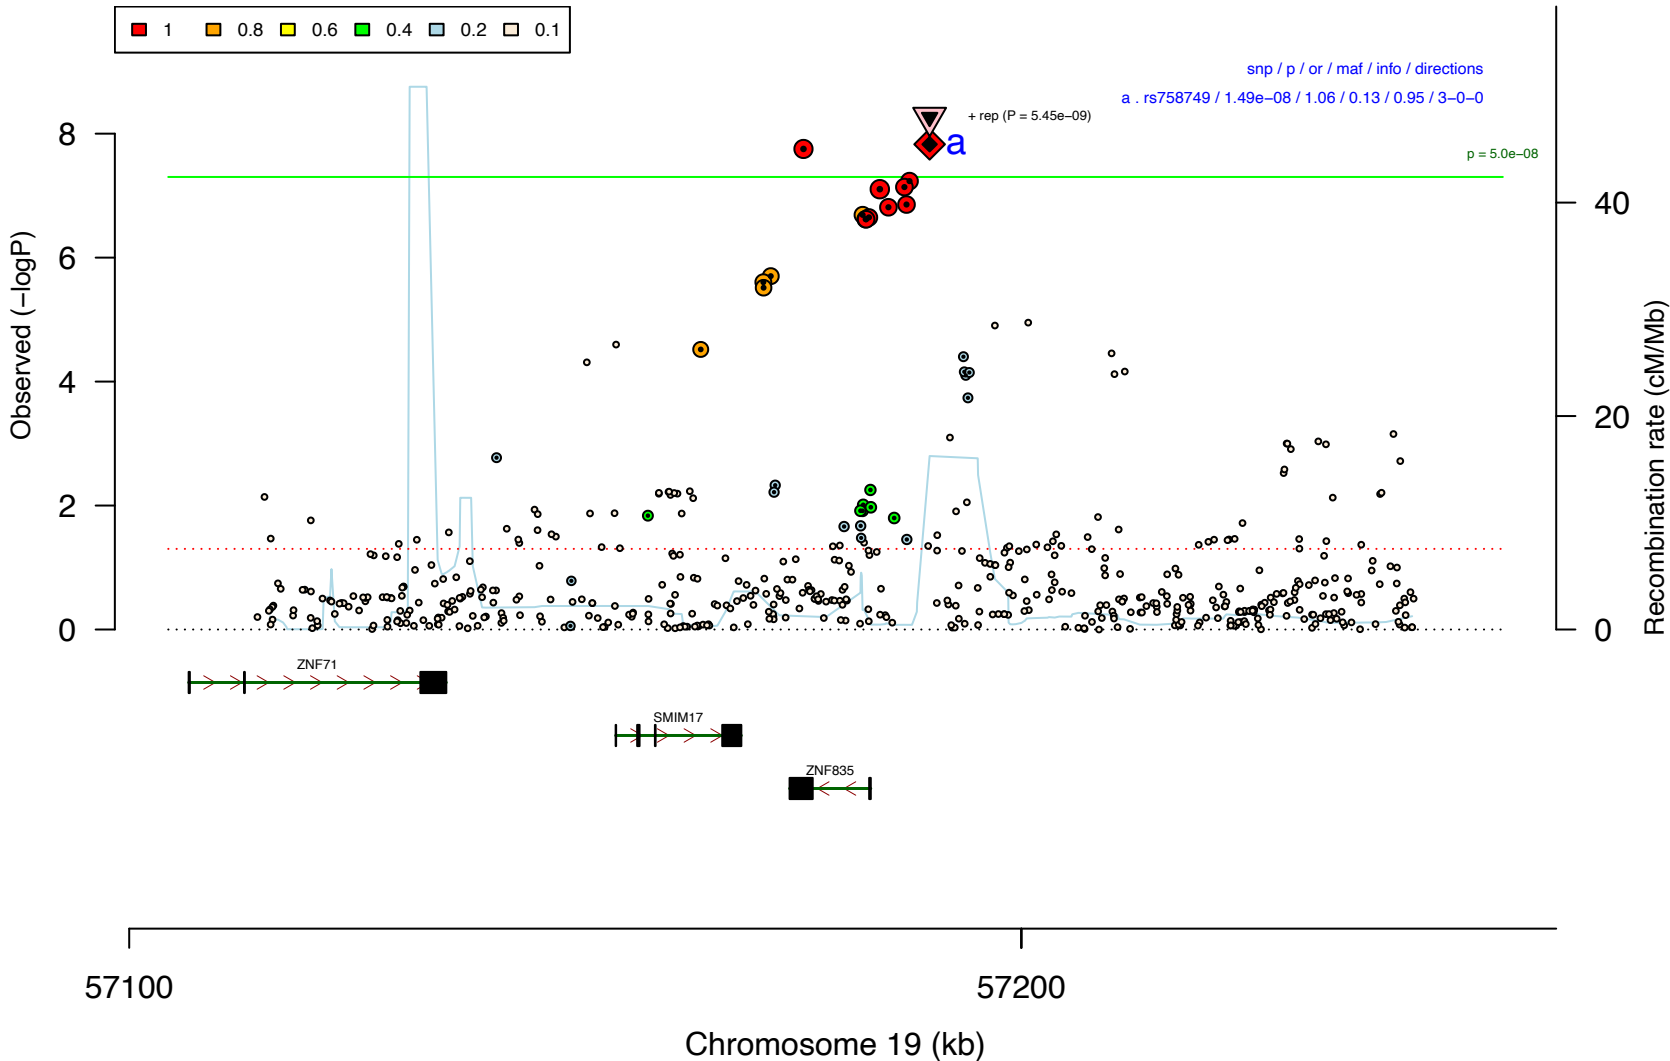

# PGC\_SCZ\_w3\_90\_0418b.187.chr2



snp / p / or / maf / info / directions  
 a . rs10173857 / 3.84e-08 / 0.95 / 0.25 / 0.948 / 0-3-0

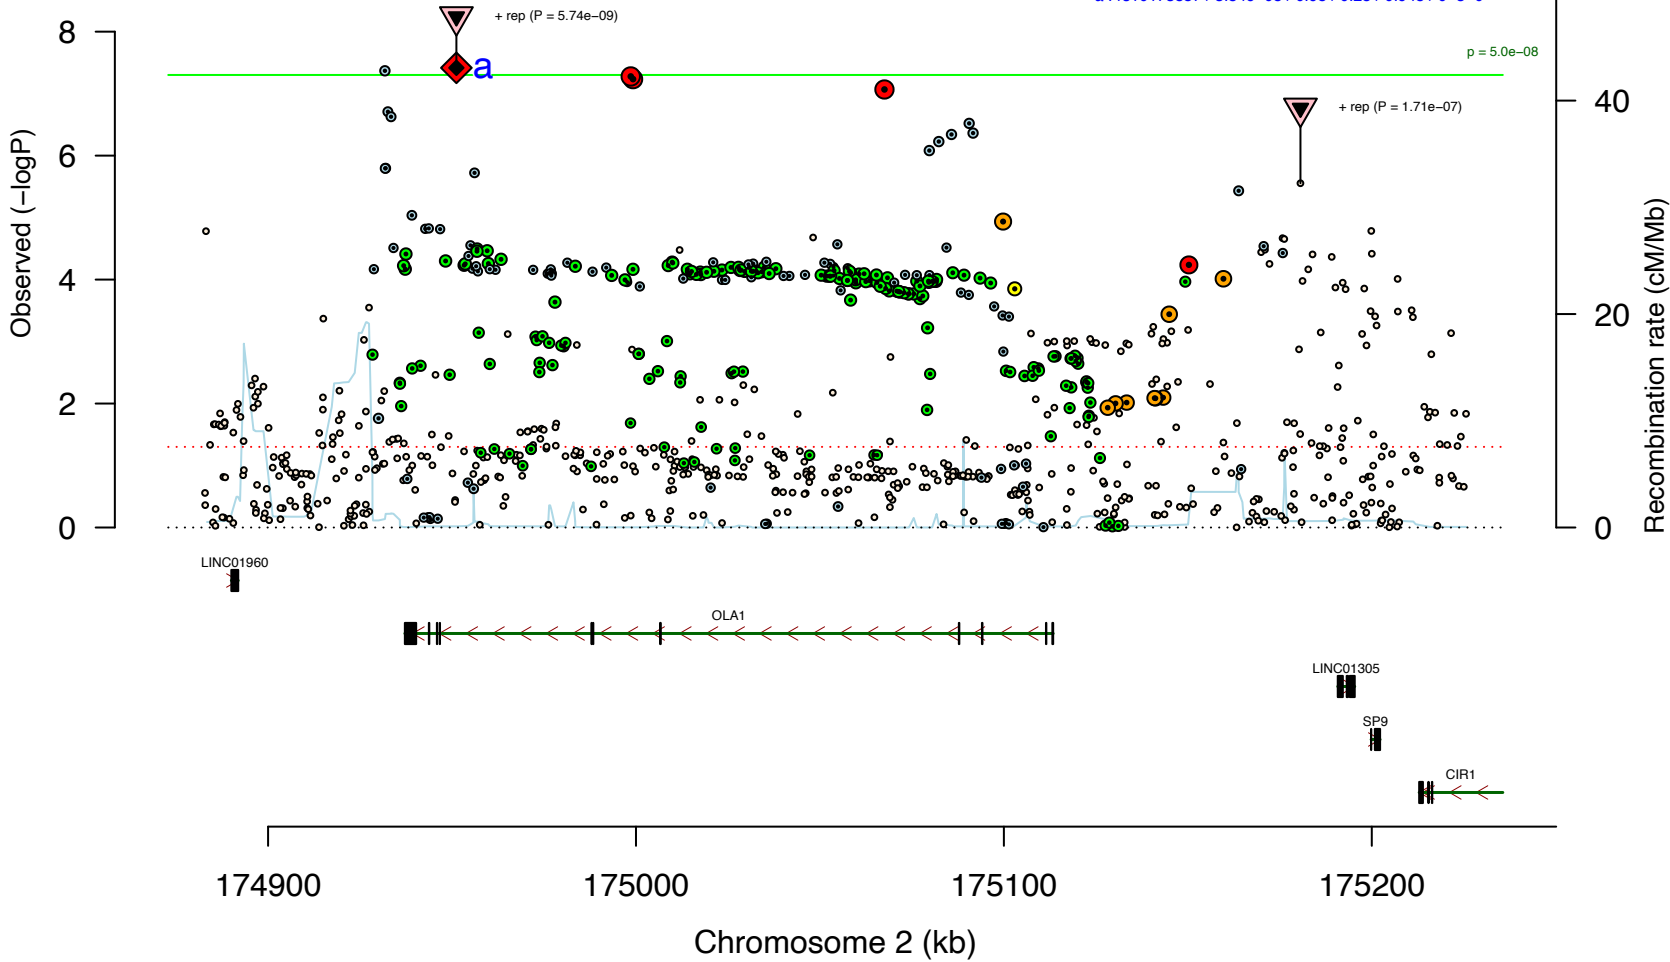

# PGC\_SCZ\_w3\_90\_0418b.188.chr12

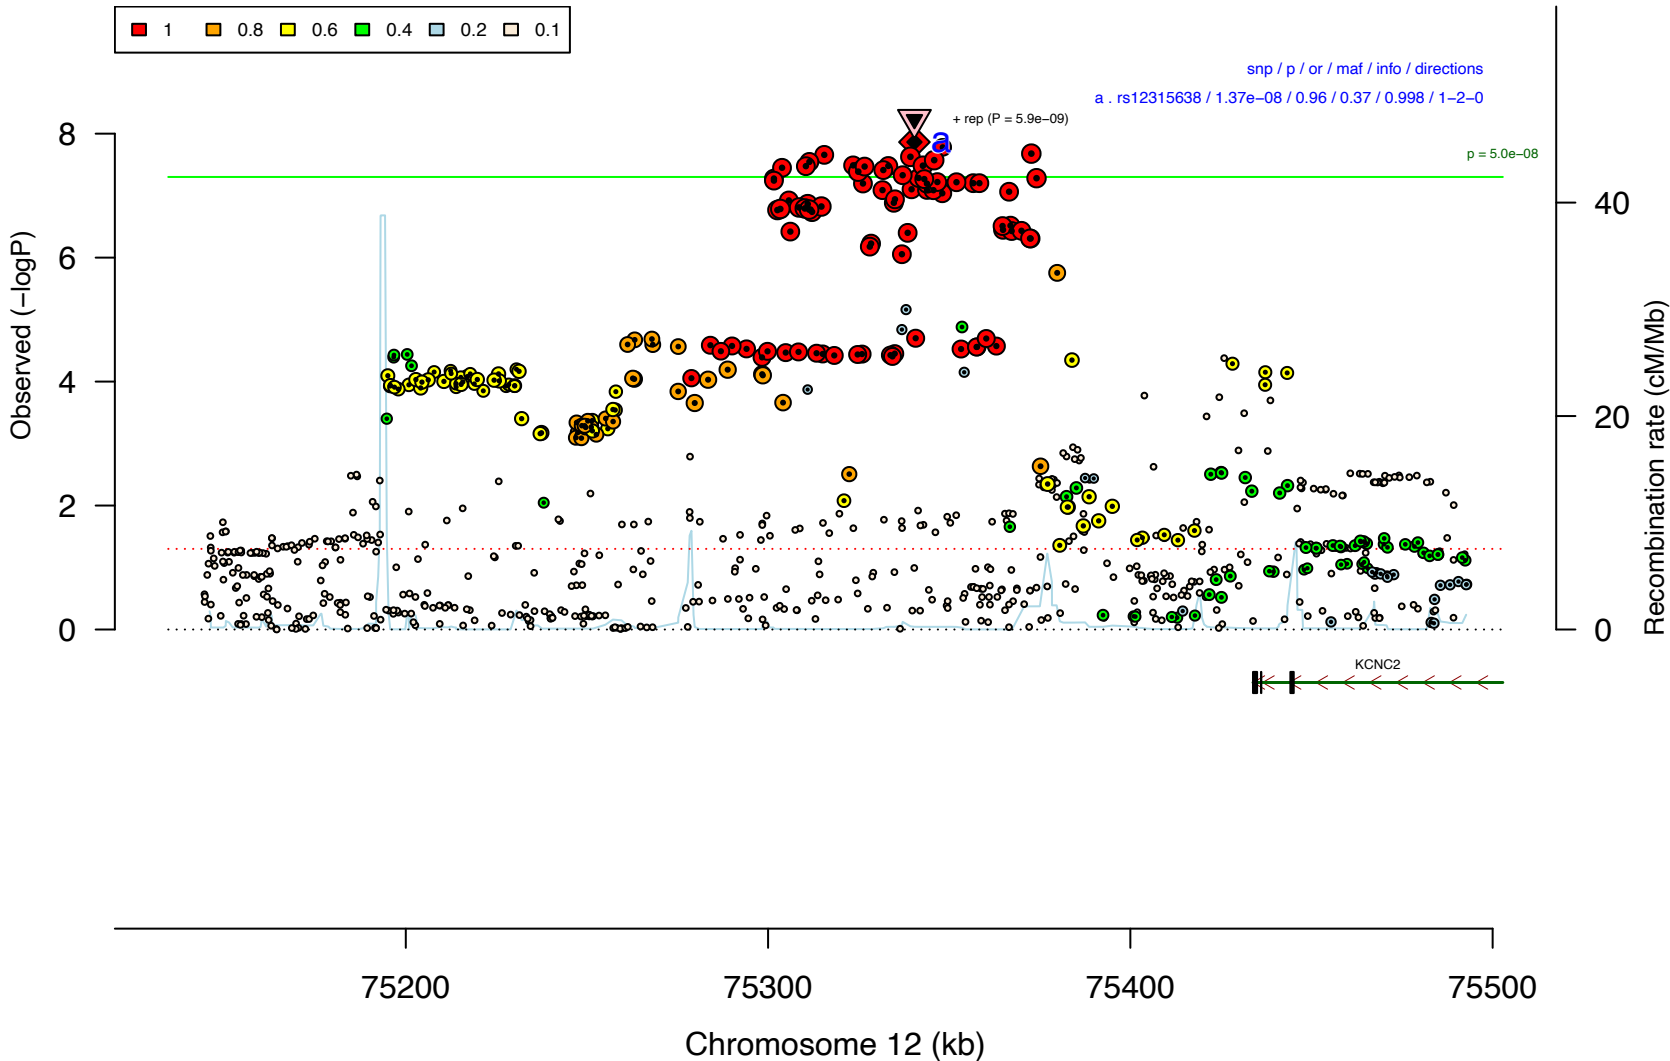



# PGC\_SCZ\_w3\_90\_0418b.189.chr1

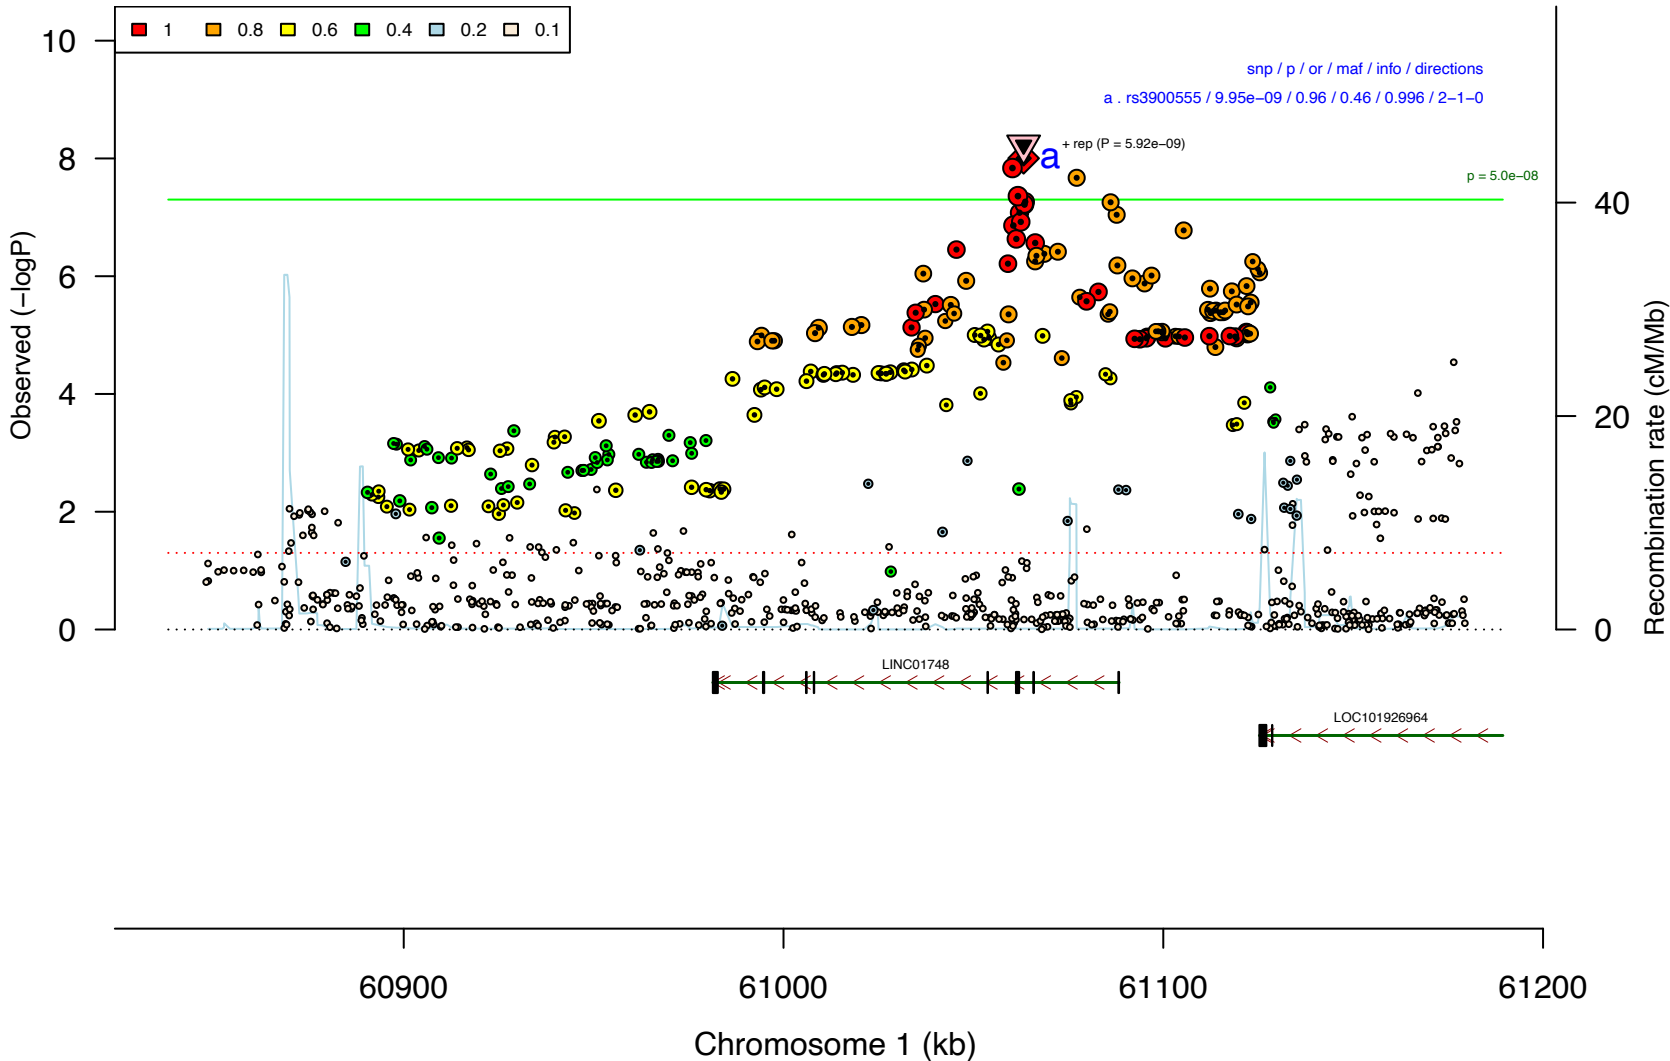

# PGC\_SCZ\_w3\_90\_0418b.190.chr2

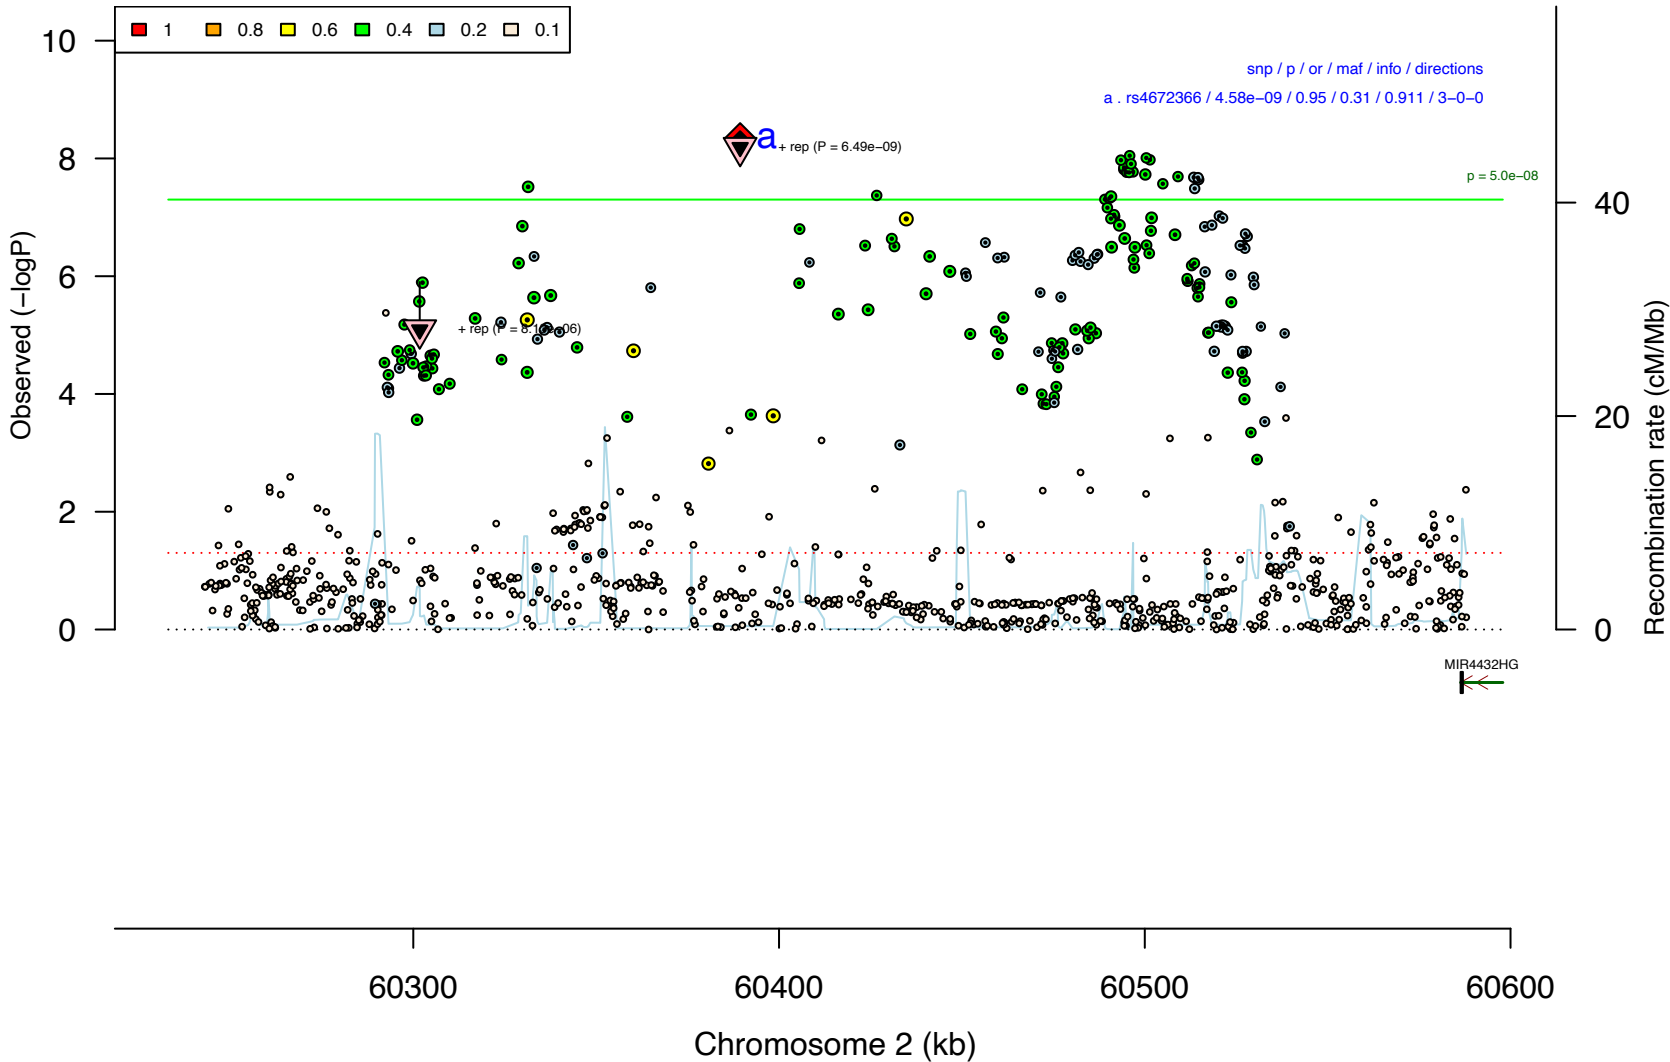

# PGC\_SCZ\_w3\_90\_0418b.191.chr1

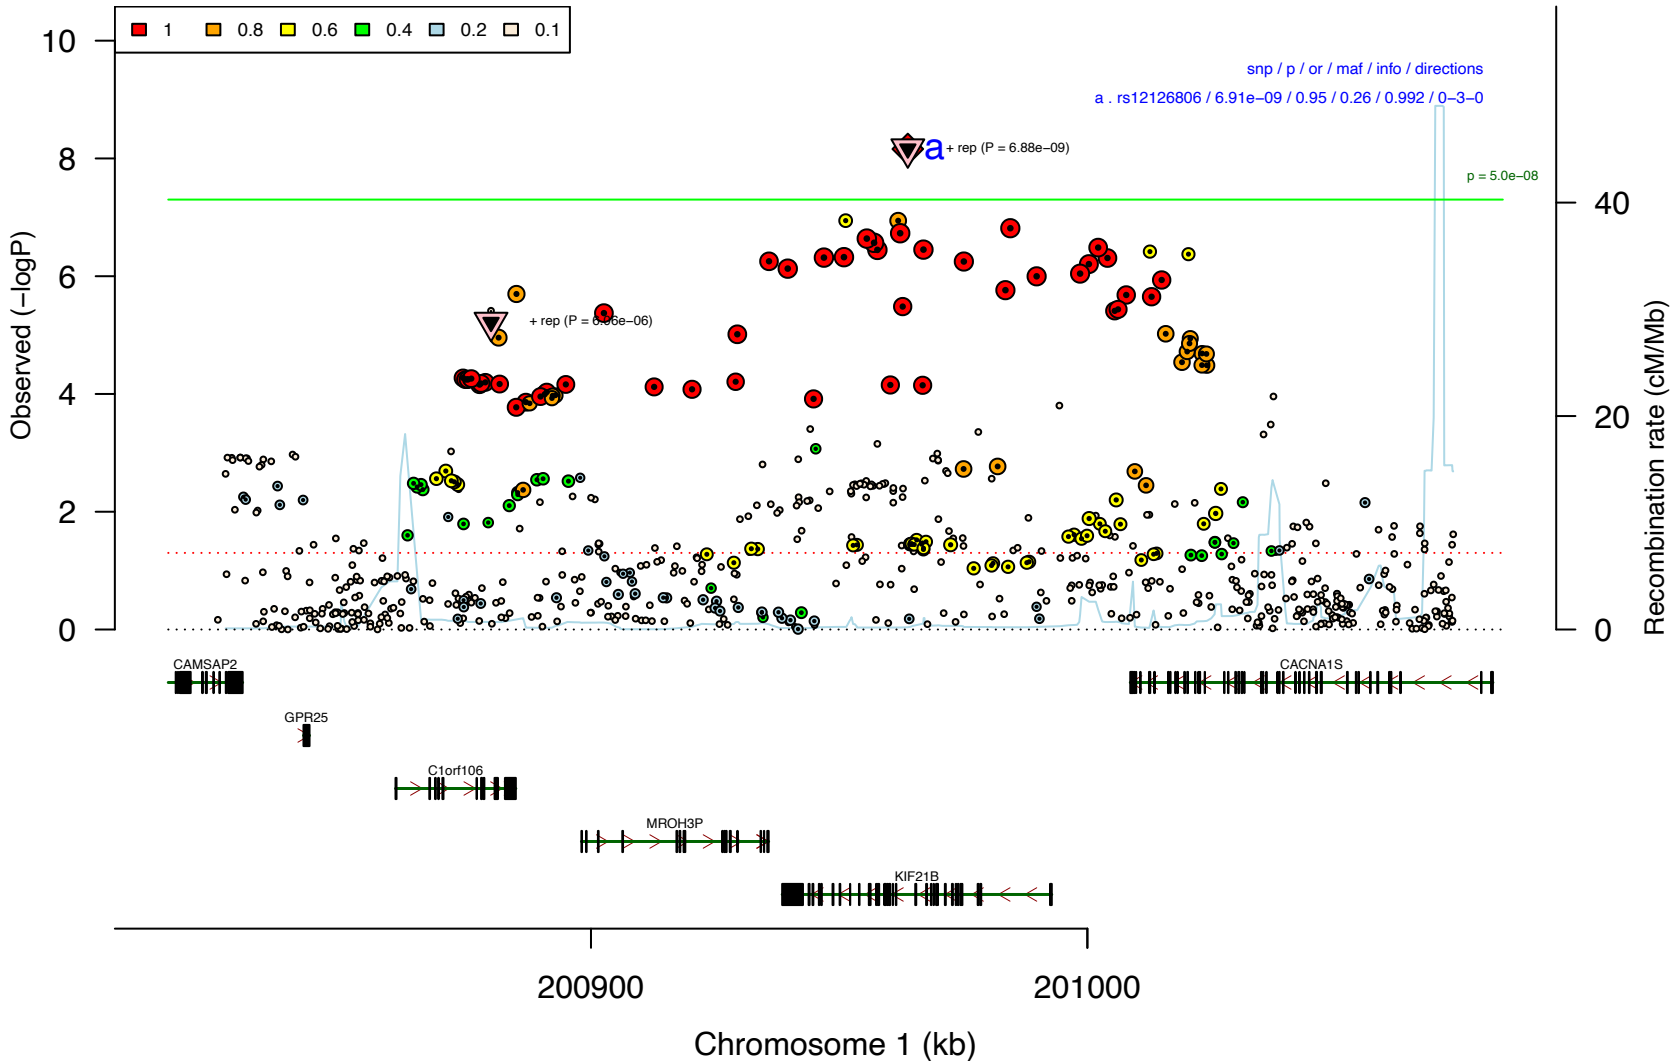

# PGC\_SCZ\_w3\_90\_0418b.192.chr13

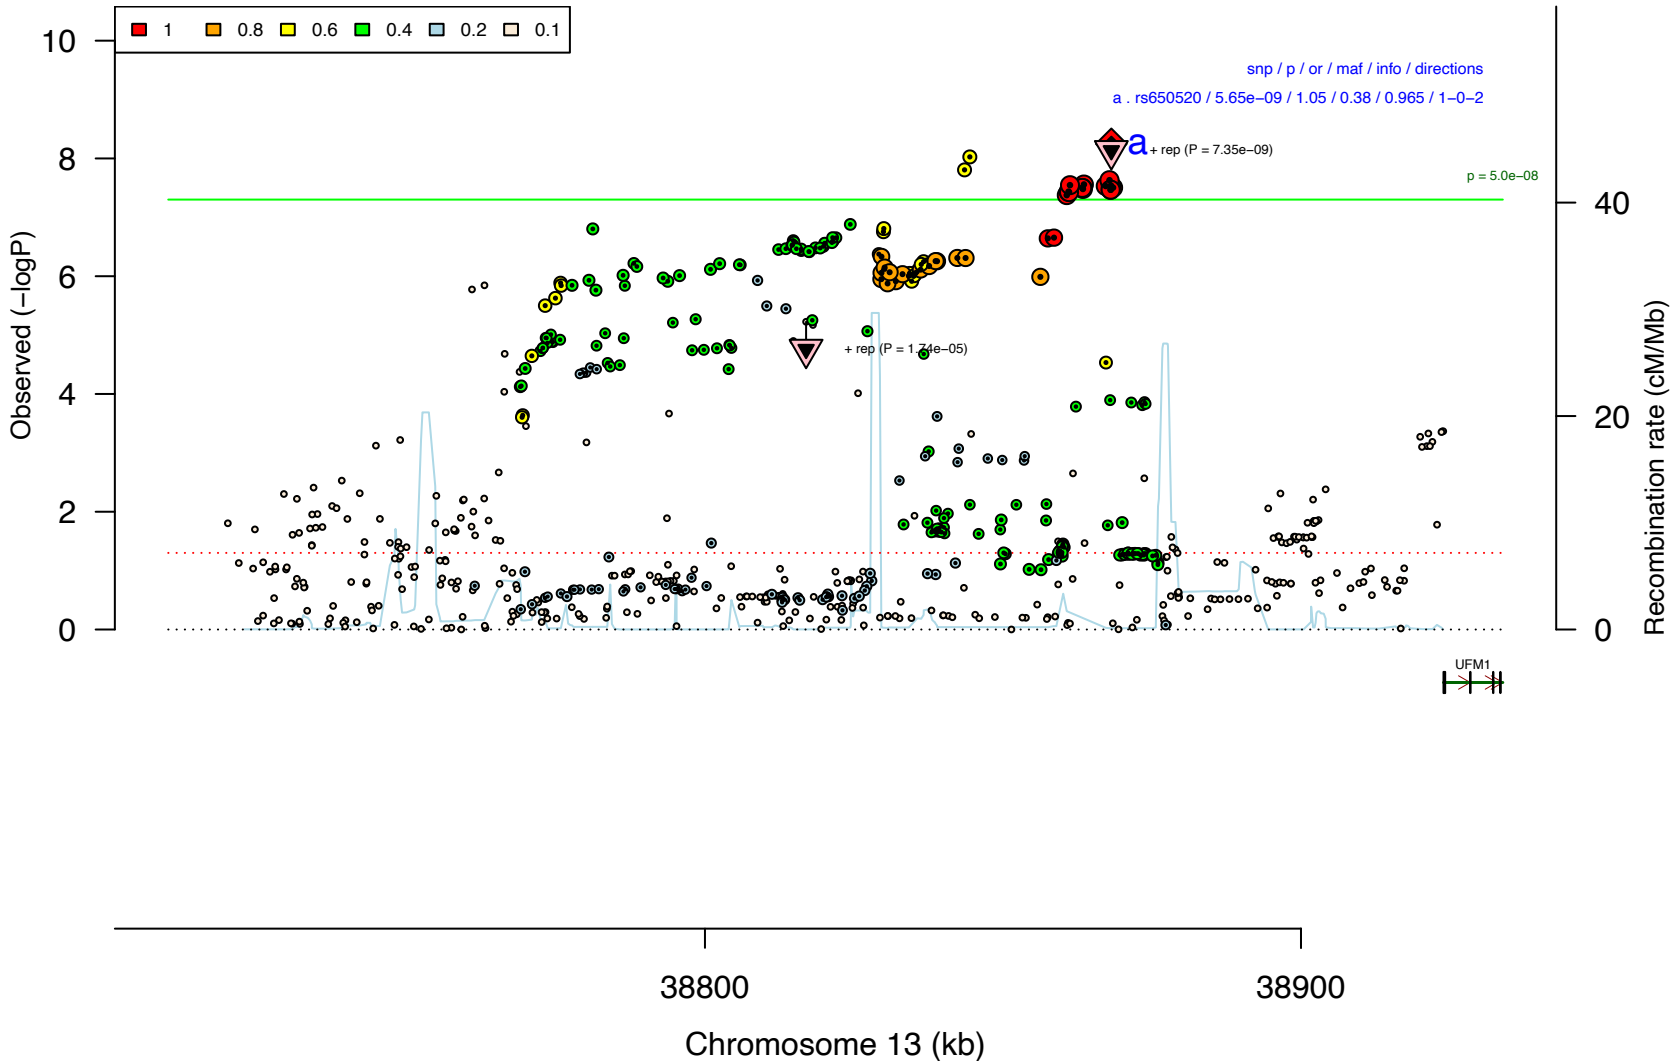

# PGC\_SCZ\_w3\_90\_0418b.193.chr8

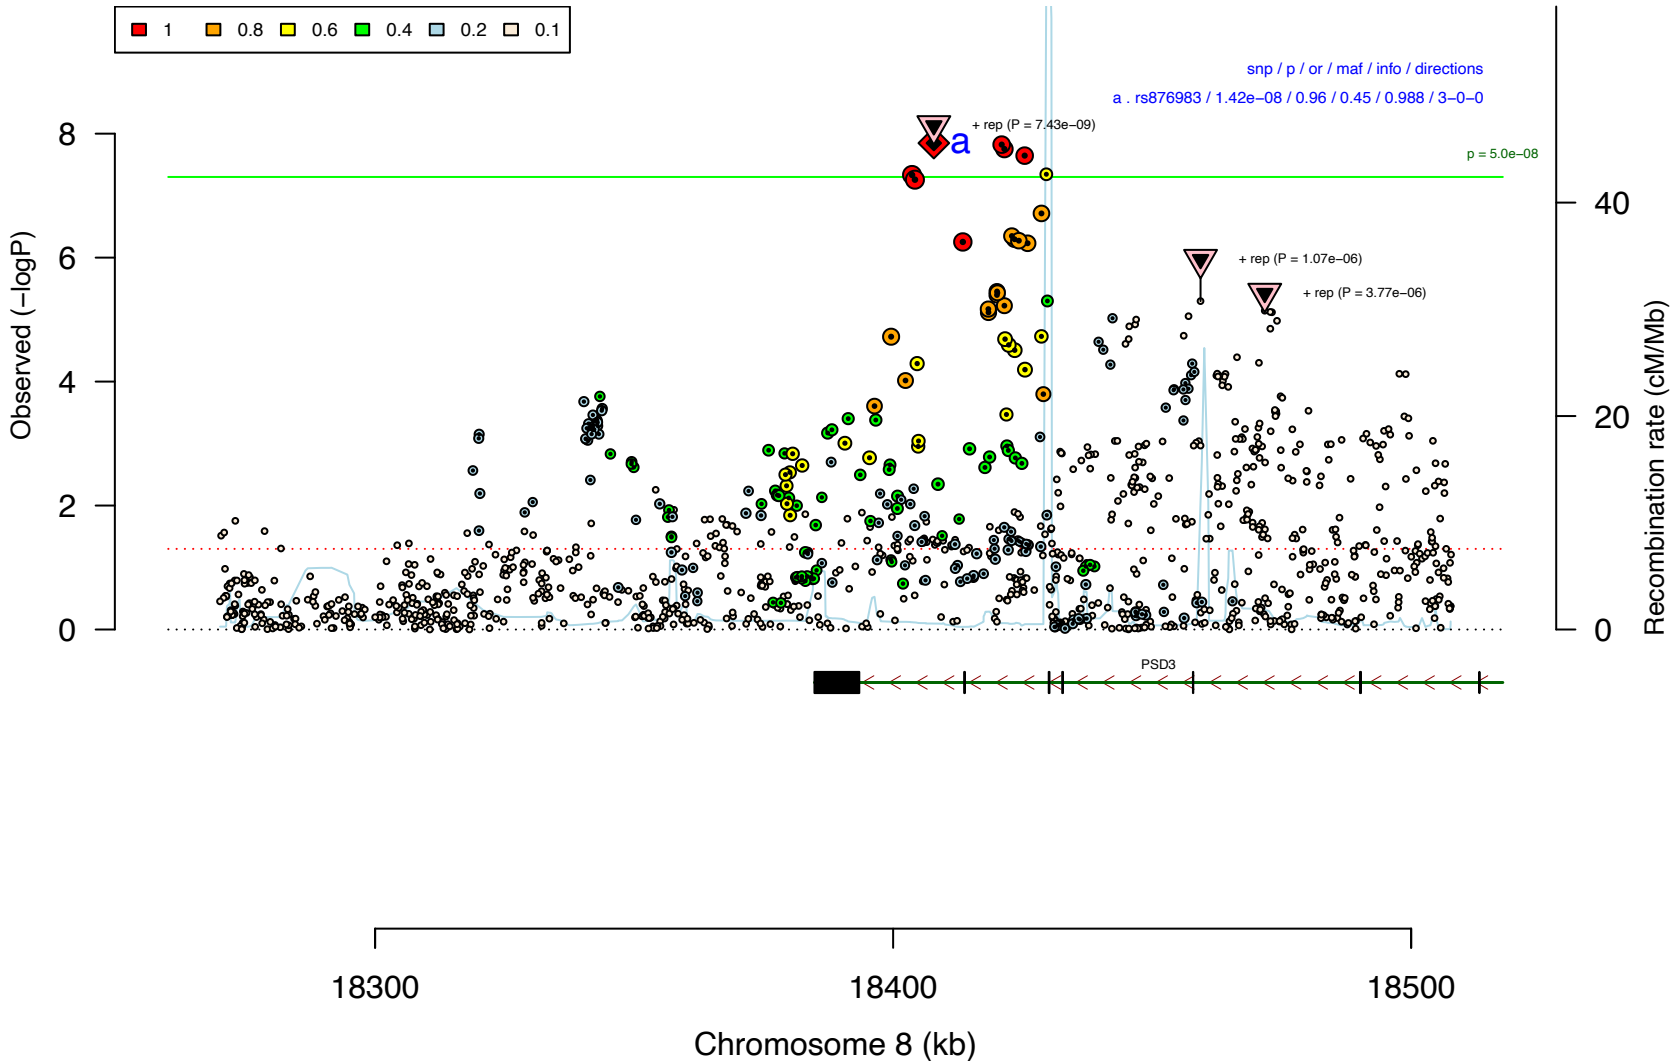

# PGC\_SCZ\_w3\_90\_0418b.194.chr14

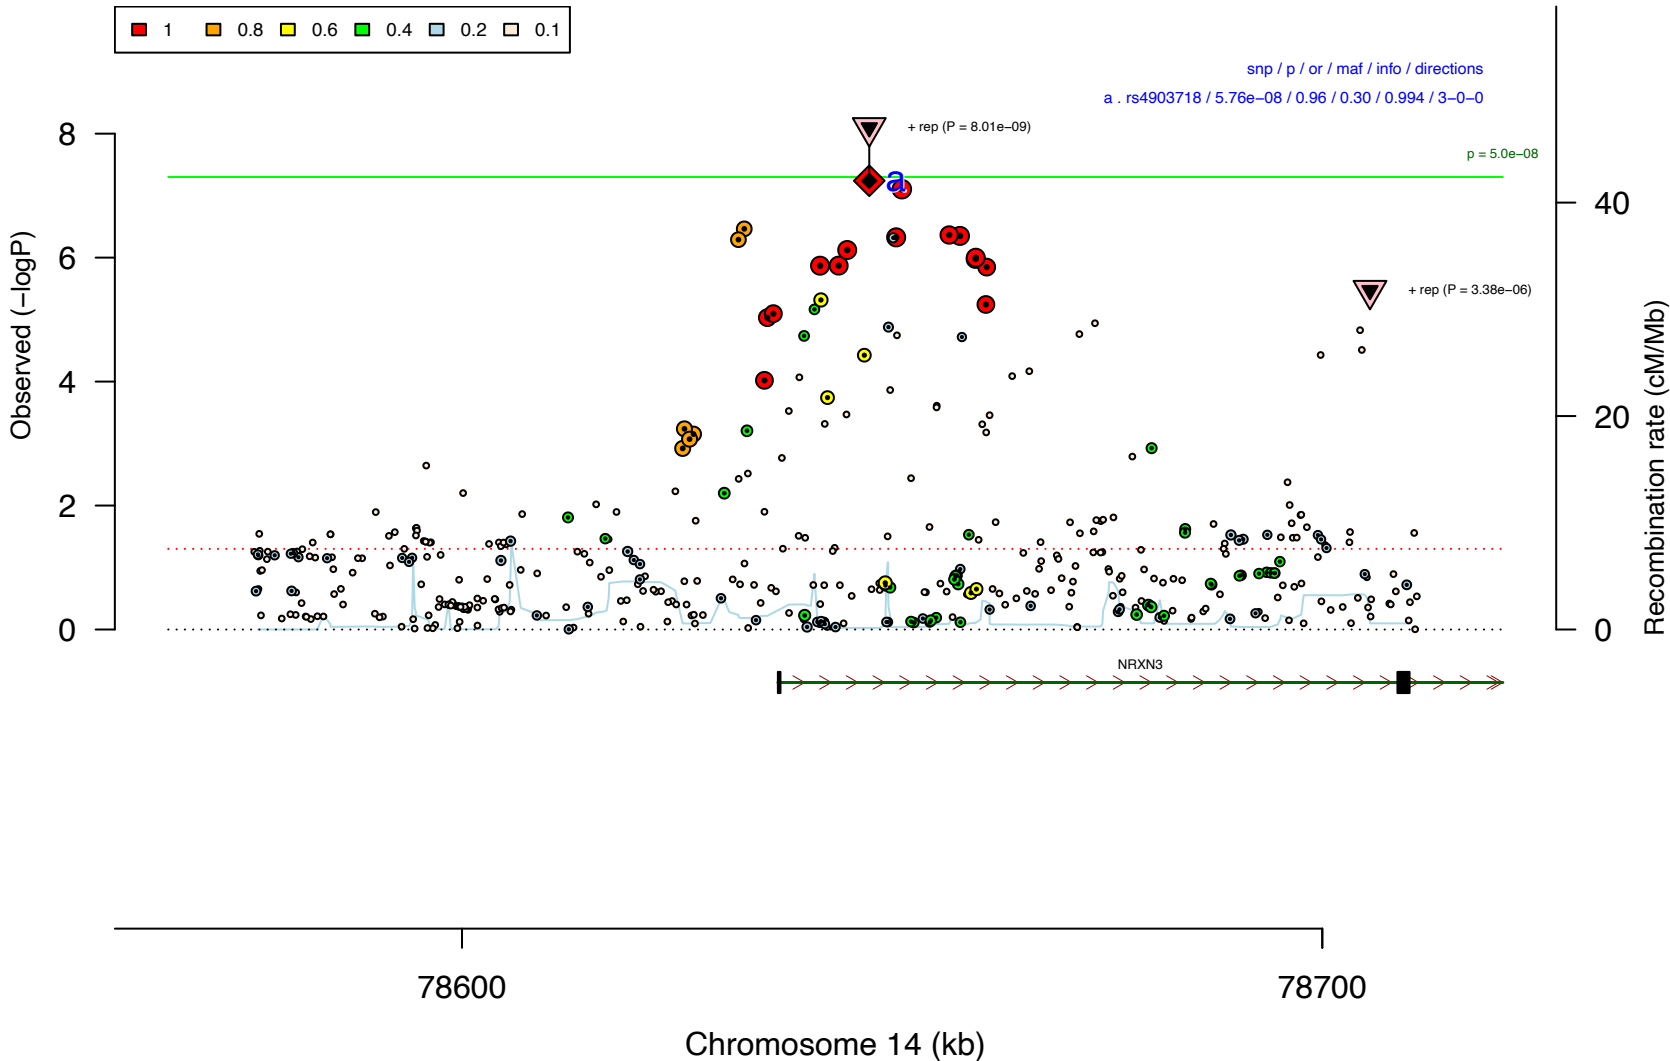

# PGC\_SCZ\_w3\_90\_0418b.195.chr12

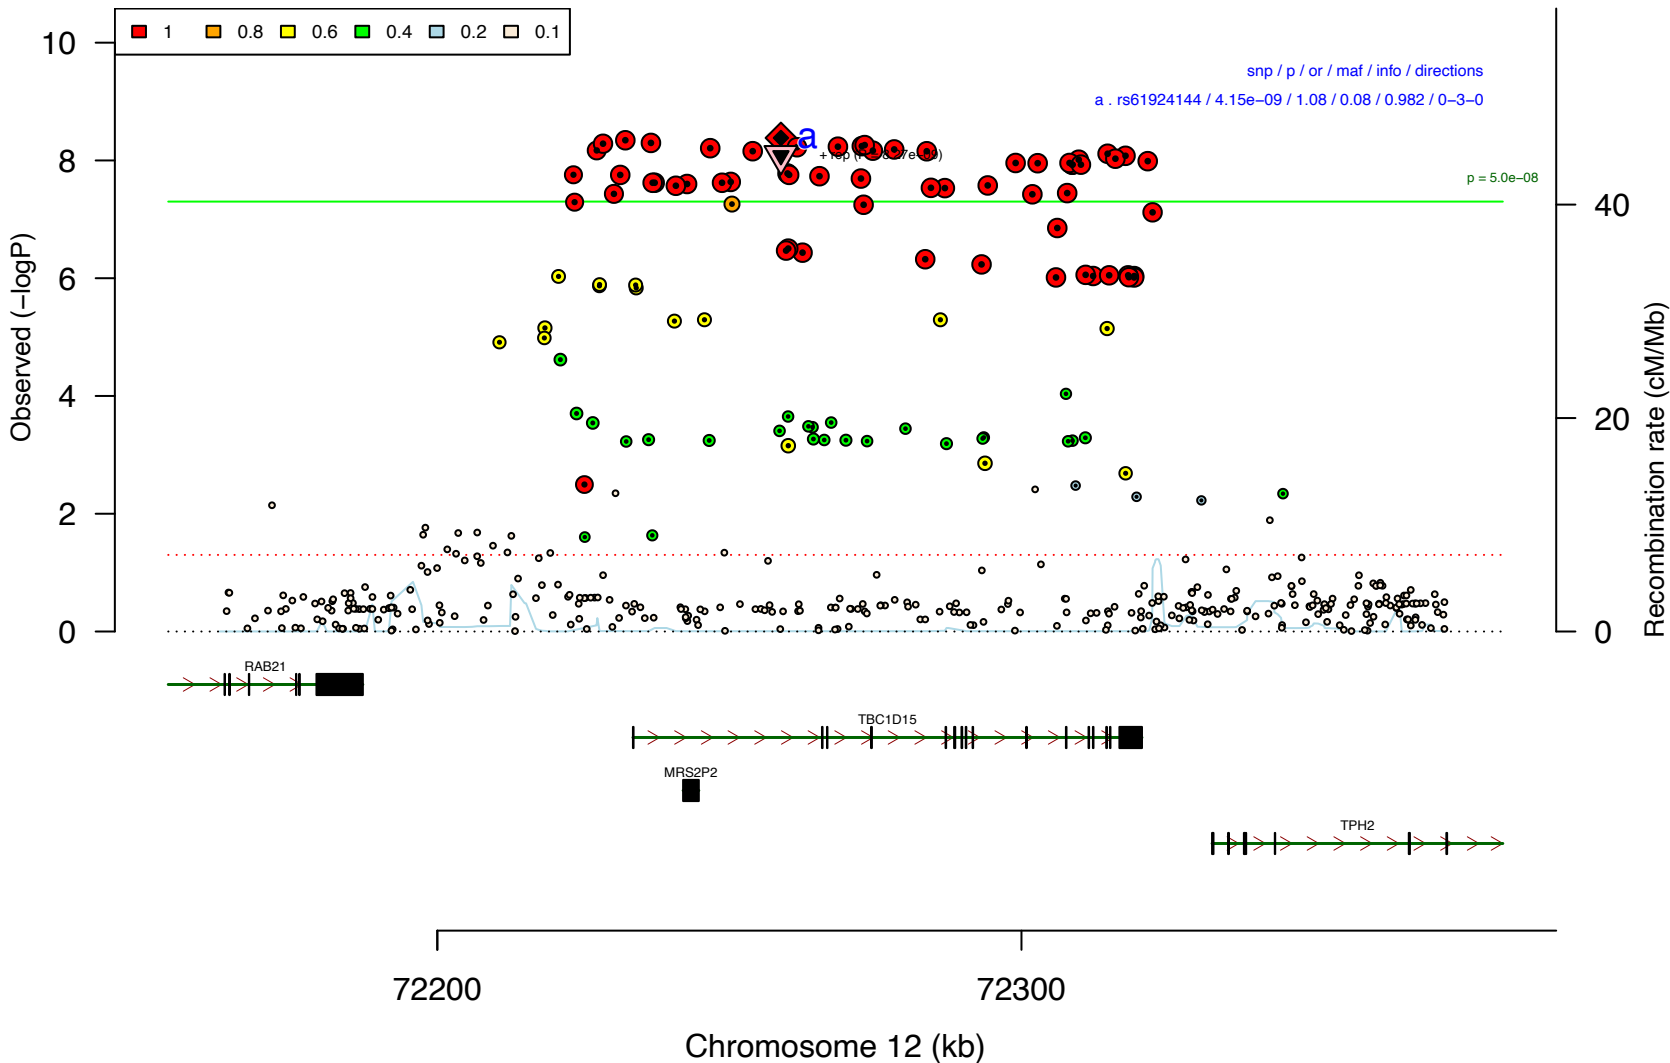

# PGC\_SCZ\_w3\_90\_0418b.196.chr21

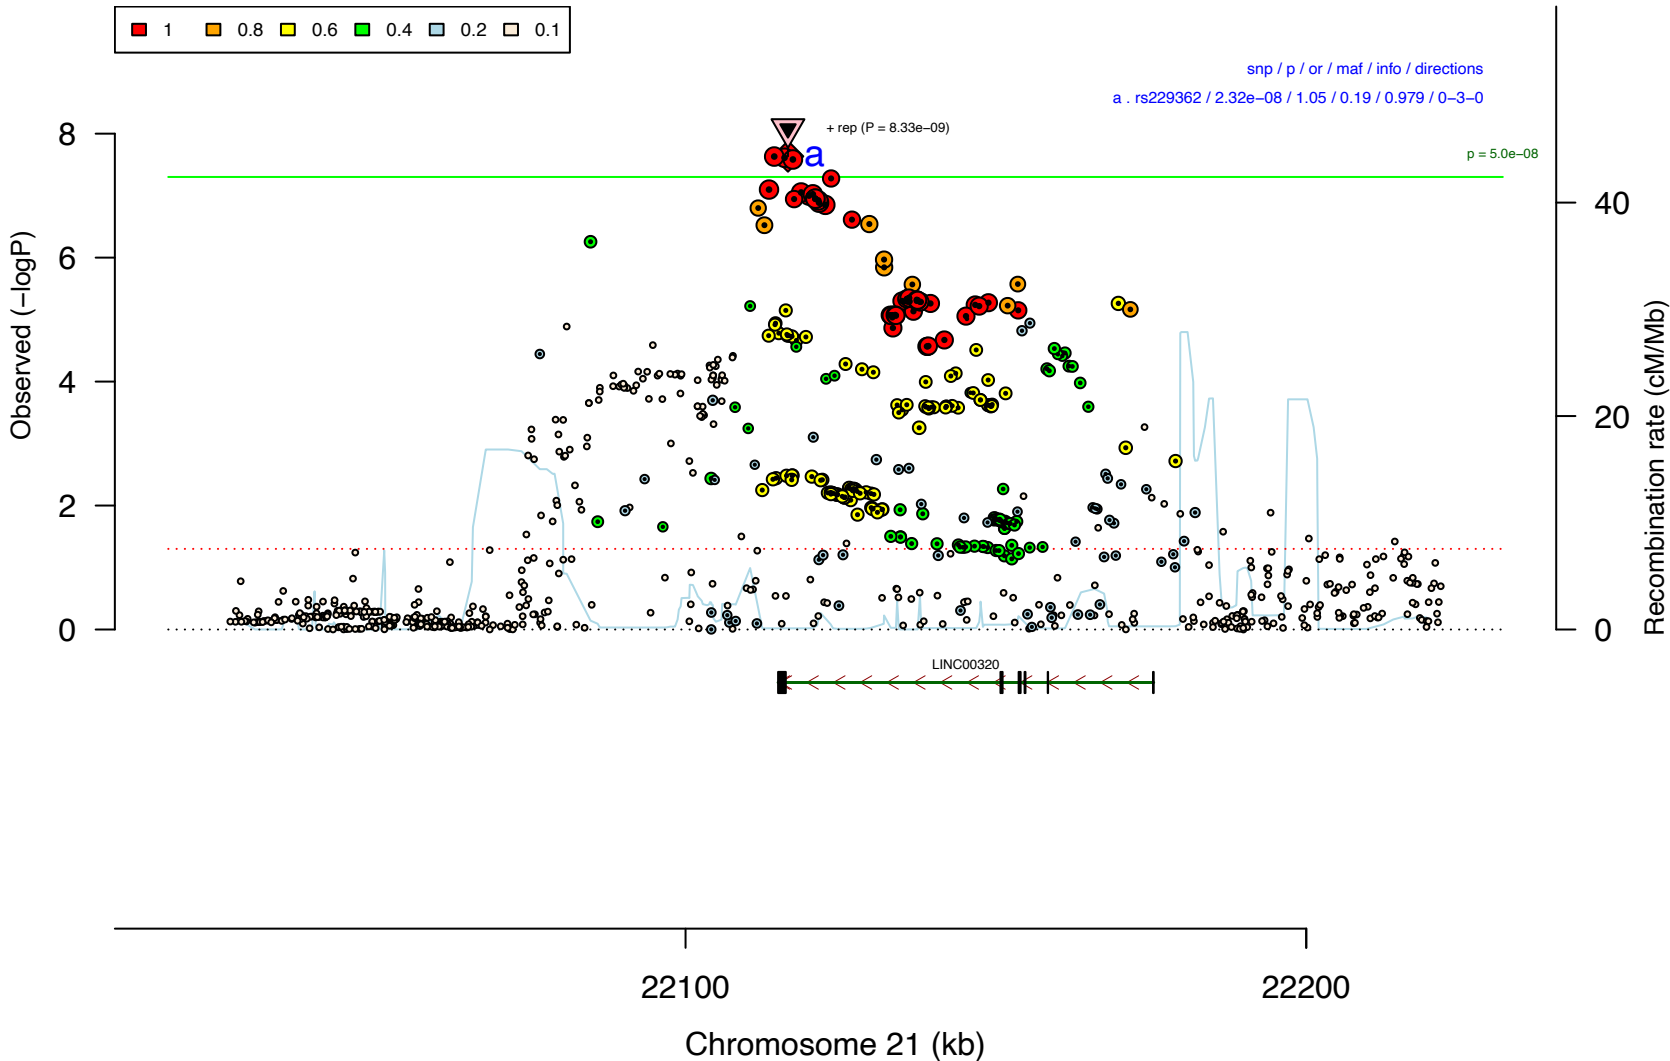



# PGC\_SCZ\_w3\_90\_0418b.197.chr5

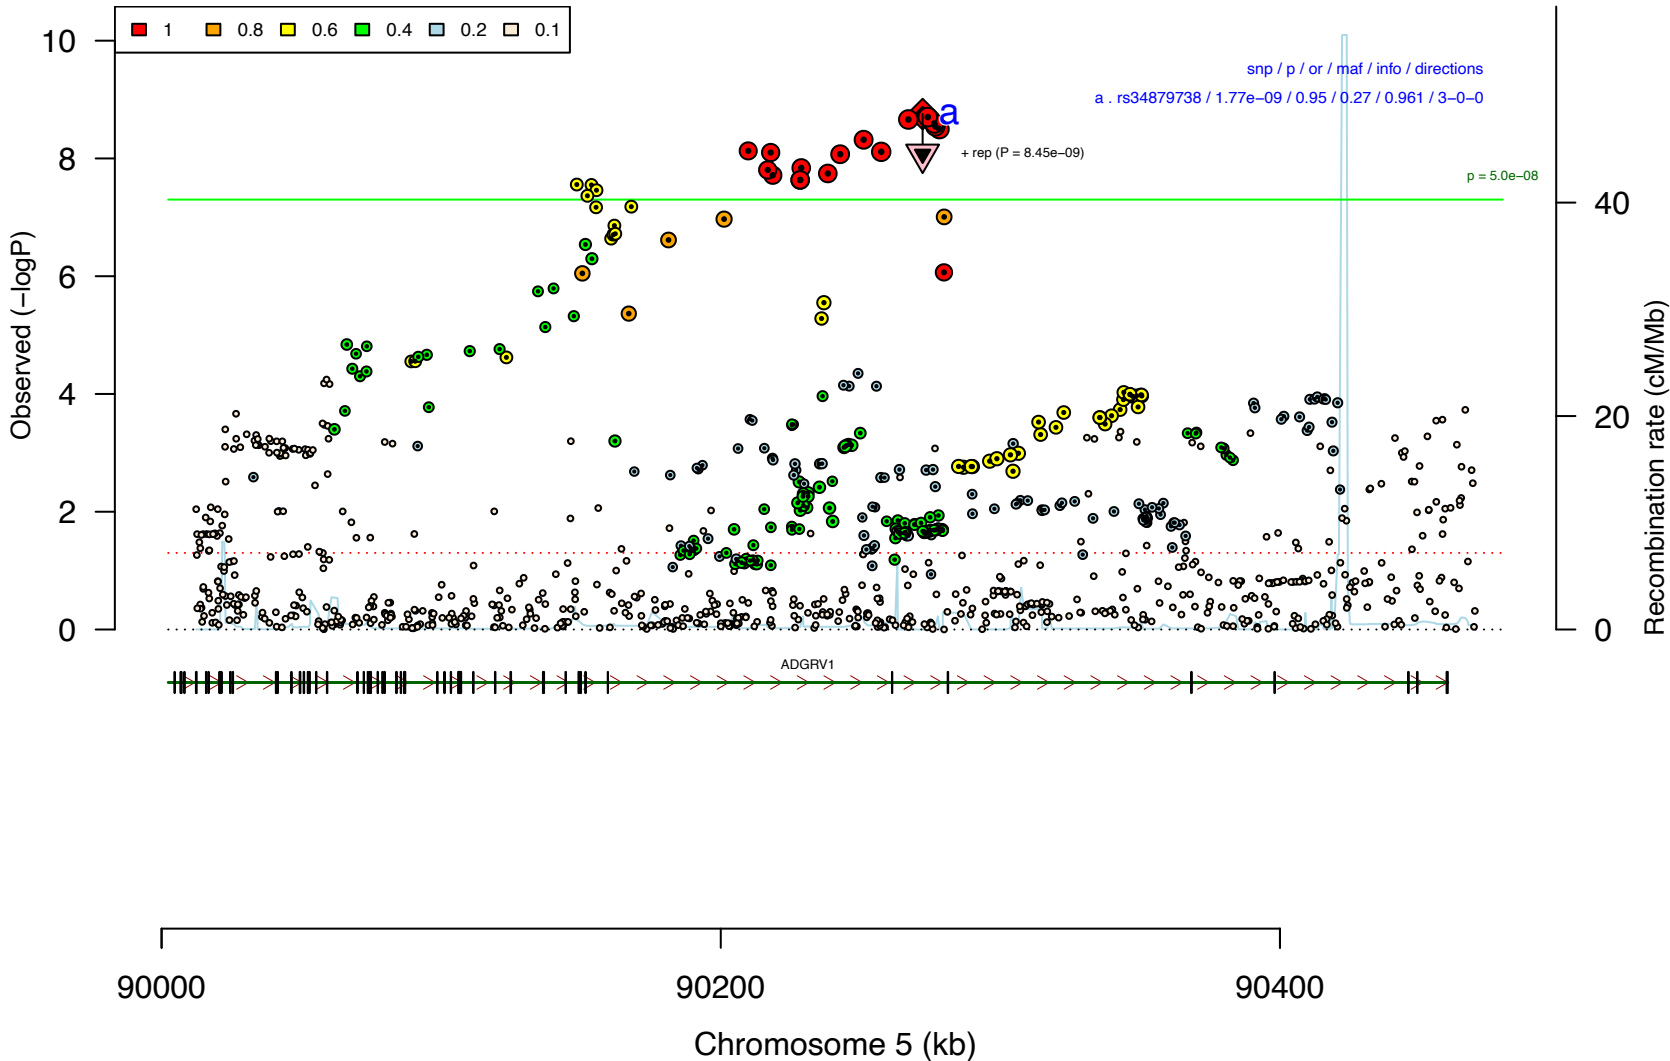

# PGC\_SCZ\_w3\_90\_0418b.198.chr7

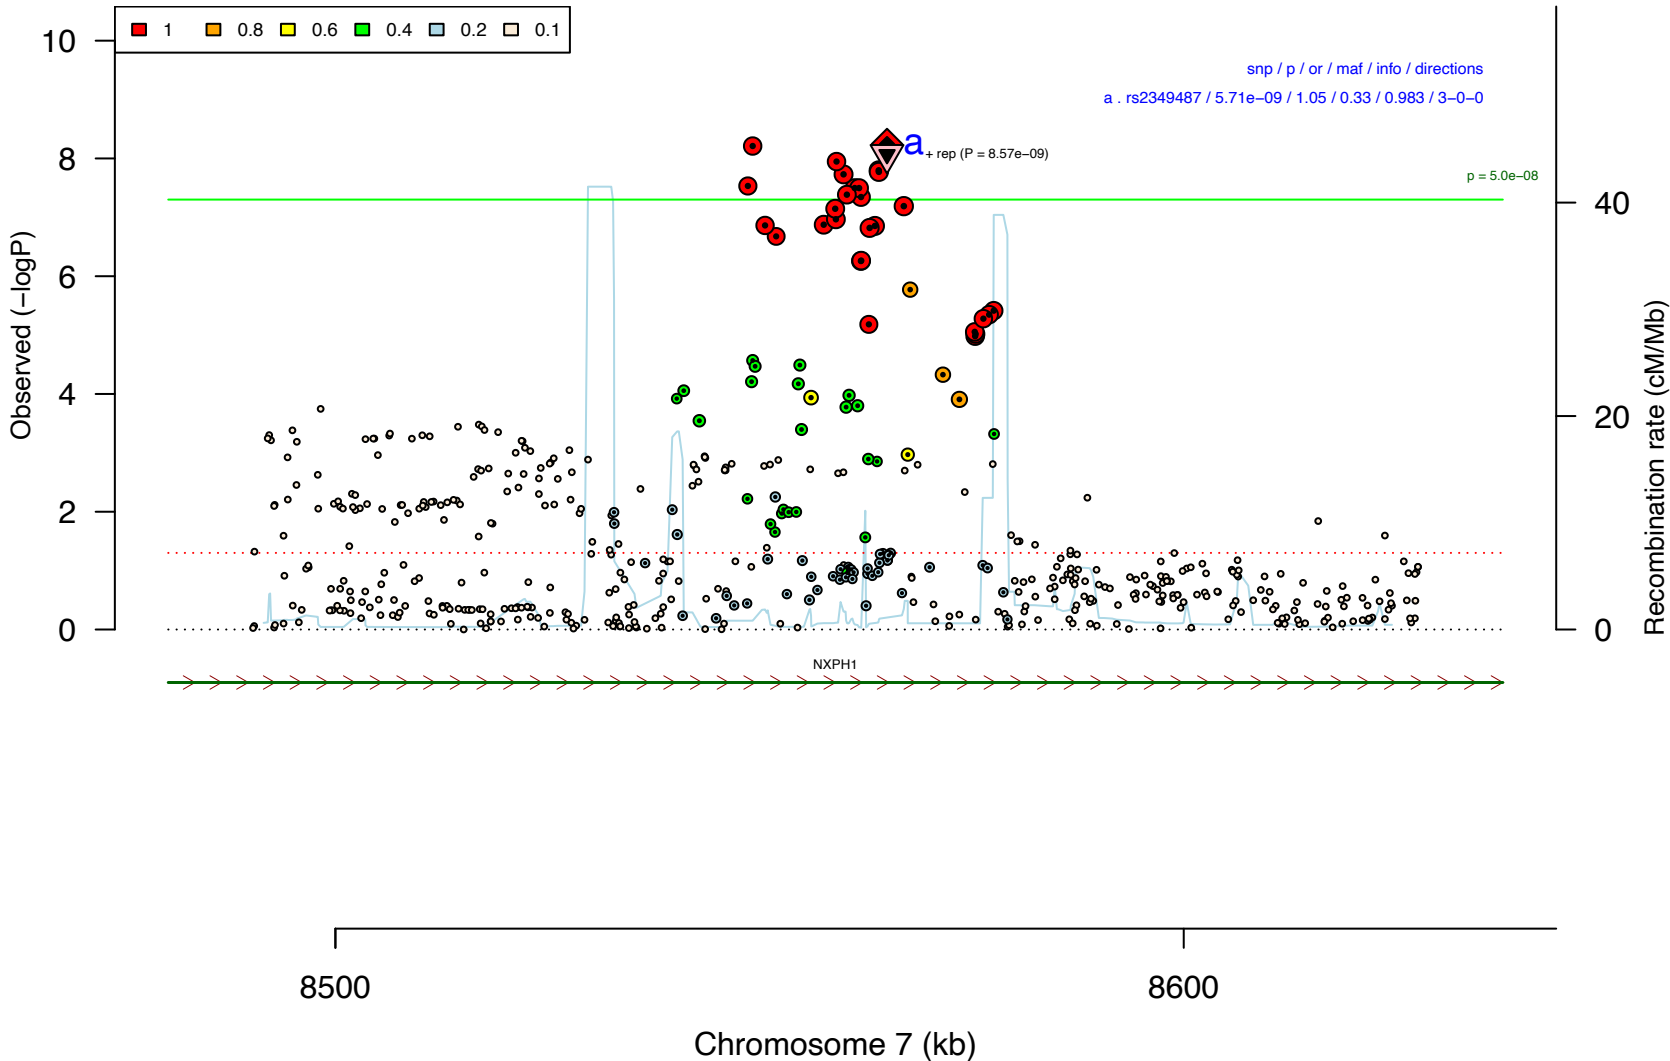

# PGC\_SCZ\_w3\_90\_0418b.199.chr5

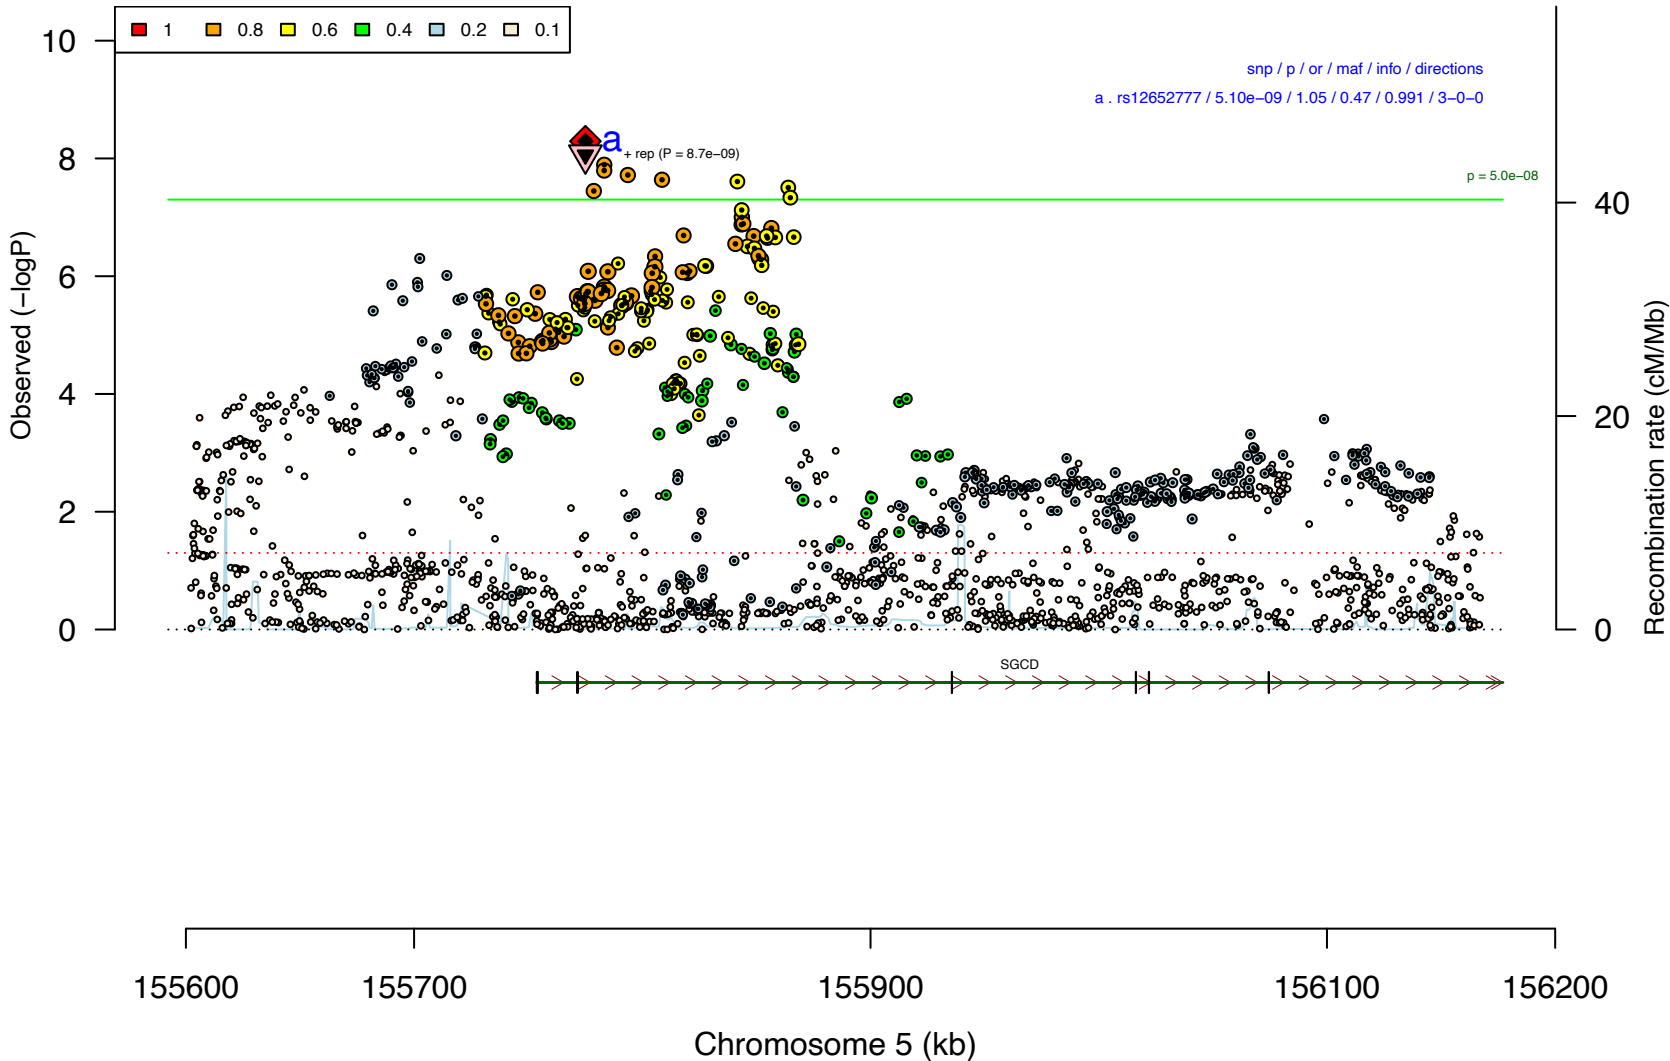

# PGC\_SCZ\_w3\_90\_0418b.200.chr2

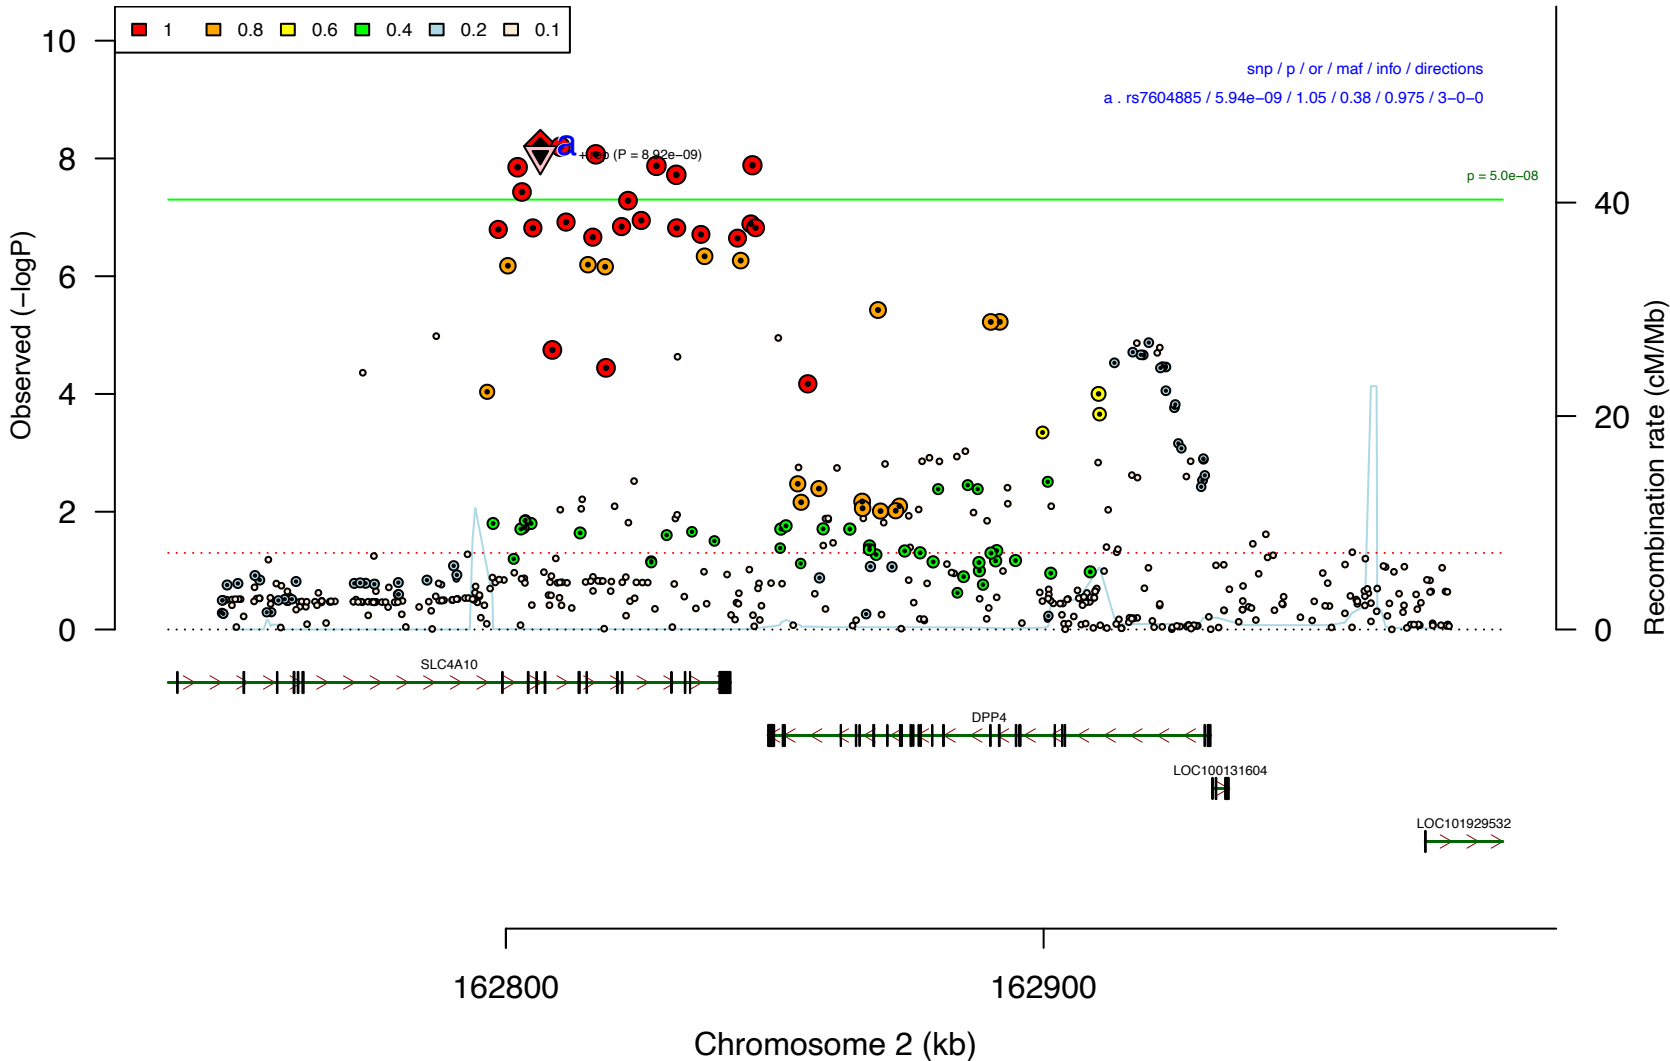

# PGC\_SCZ\_w3\_90\_0418b.201.chr13

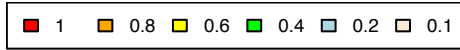

snp / p / or / maf / info / directions  
a . rs61973697 / 1.57e-08 / 1.06 / 0.21 / 0.991 / 3-0-0

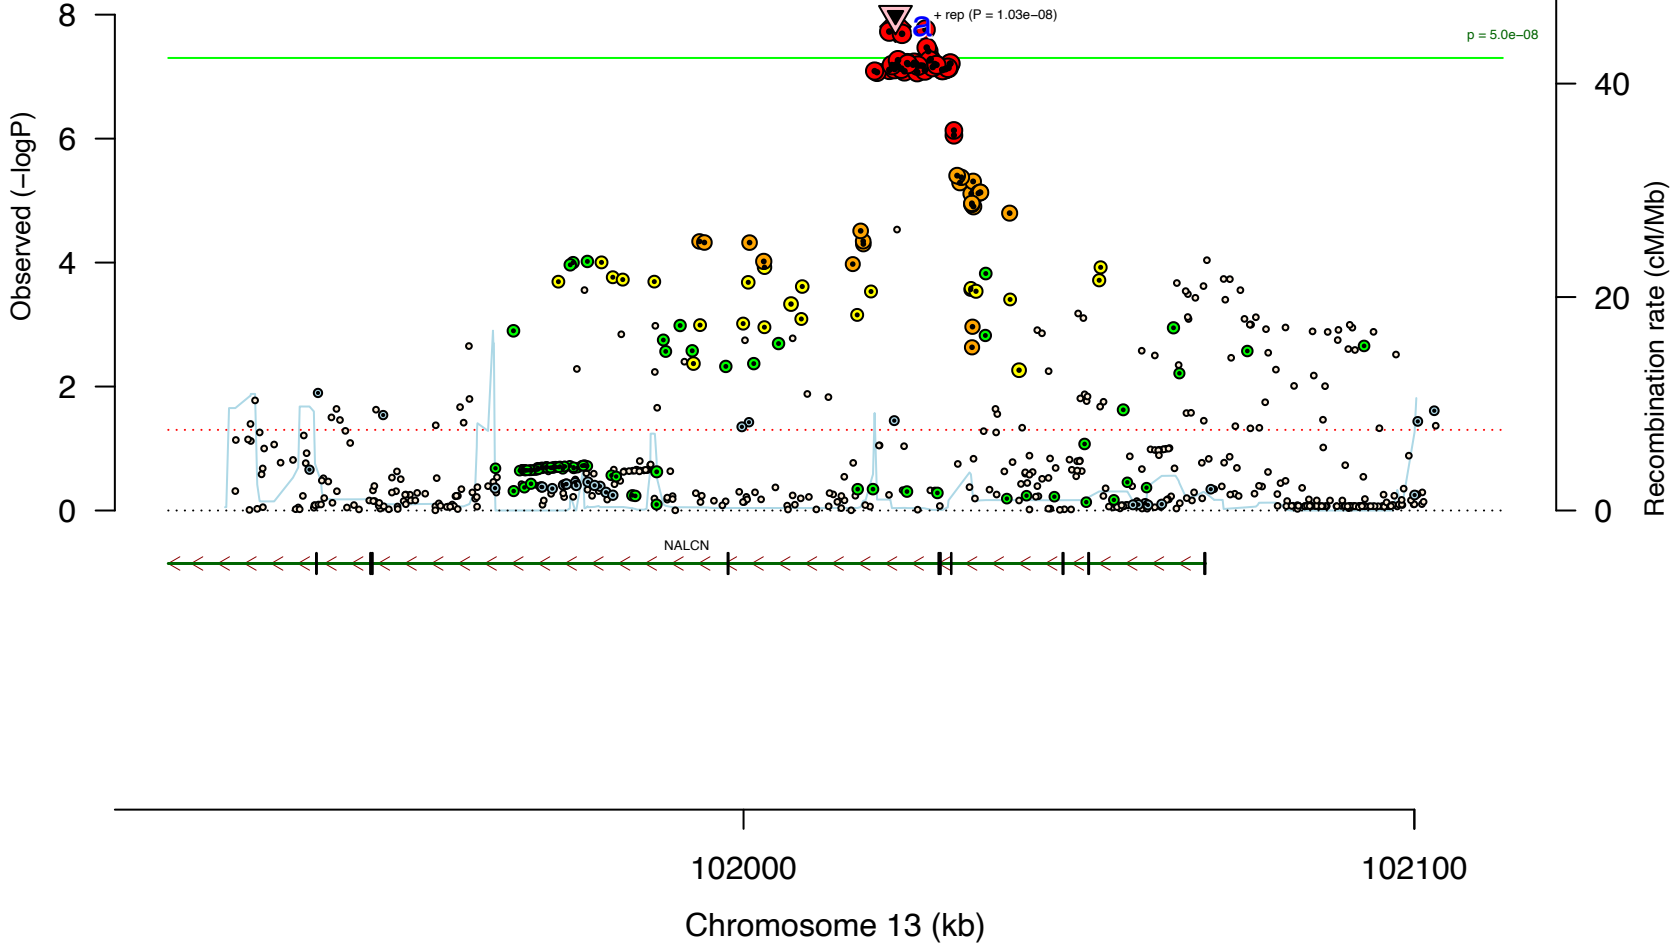

# PGC\_SCZ\_w3\_90\_0418b.202.chr2

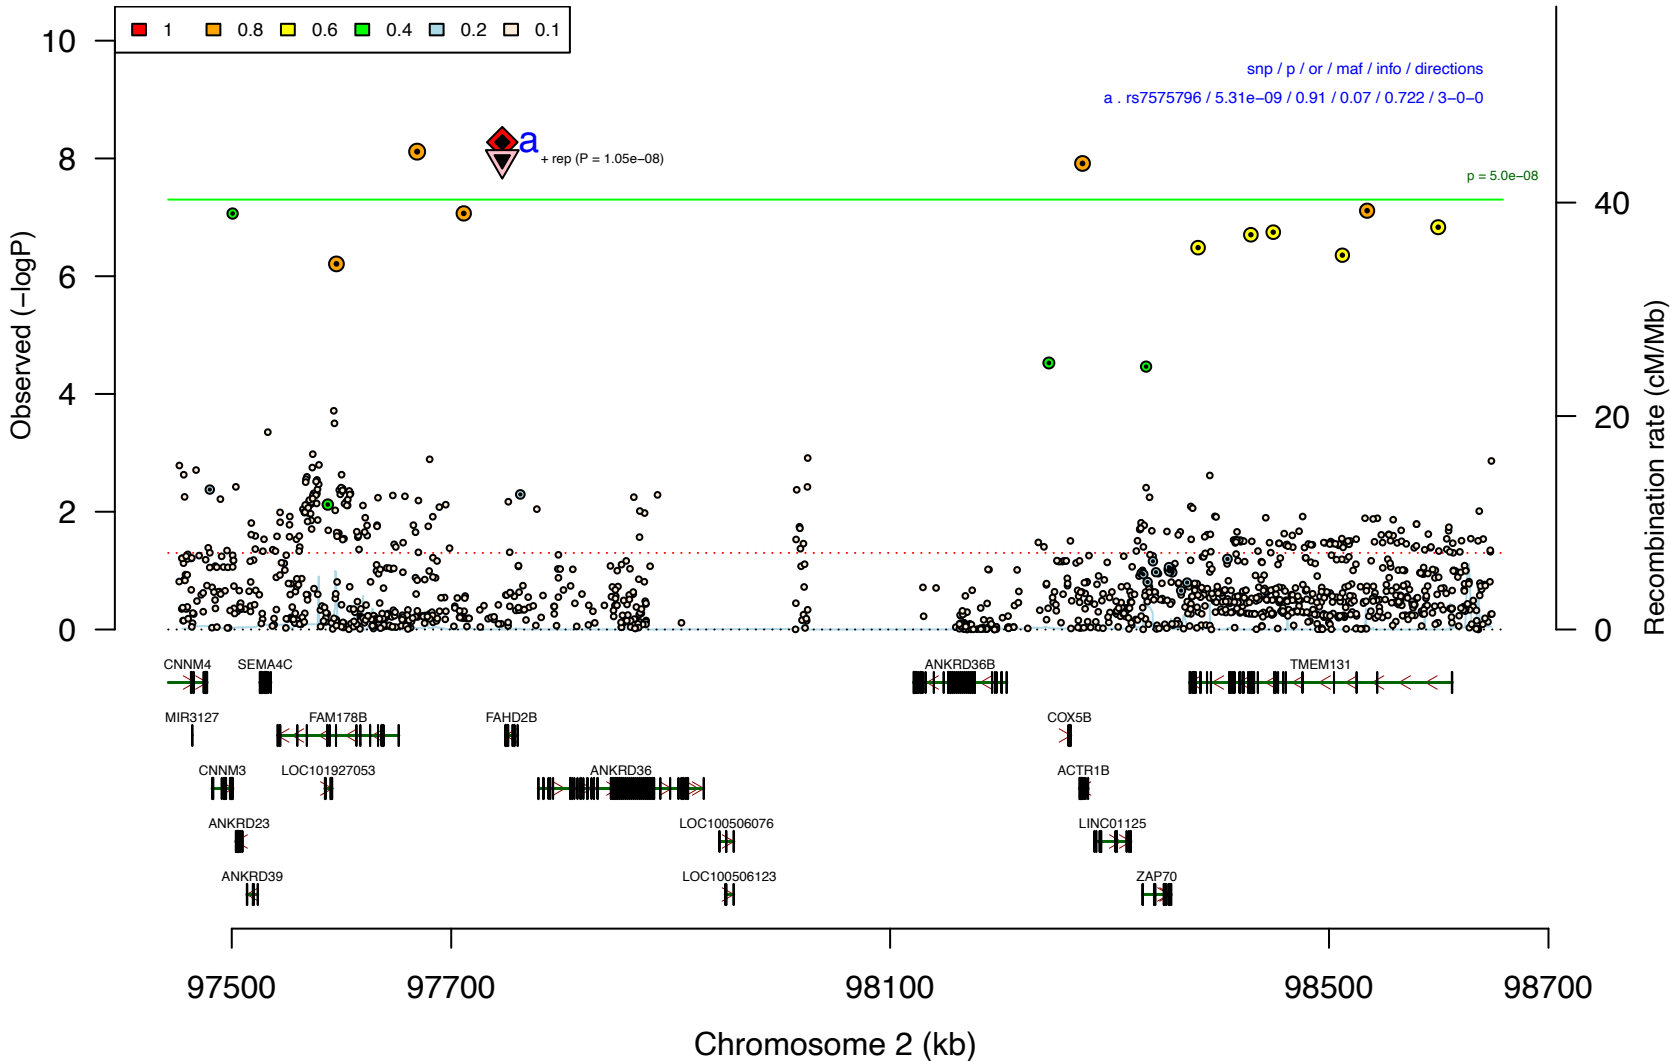

# PGC\_SCZ\_w3\_90\_0418b.203.chr1



snp / p / or / maf / info / directions  
a . rs10559 / 4.02e-08 / 1.05 / 0.30 / 0.997 / 1-2-0

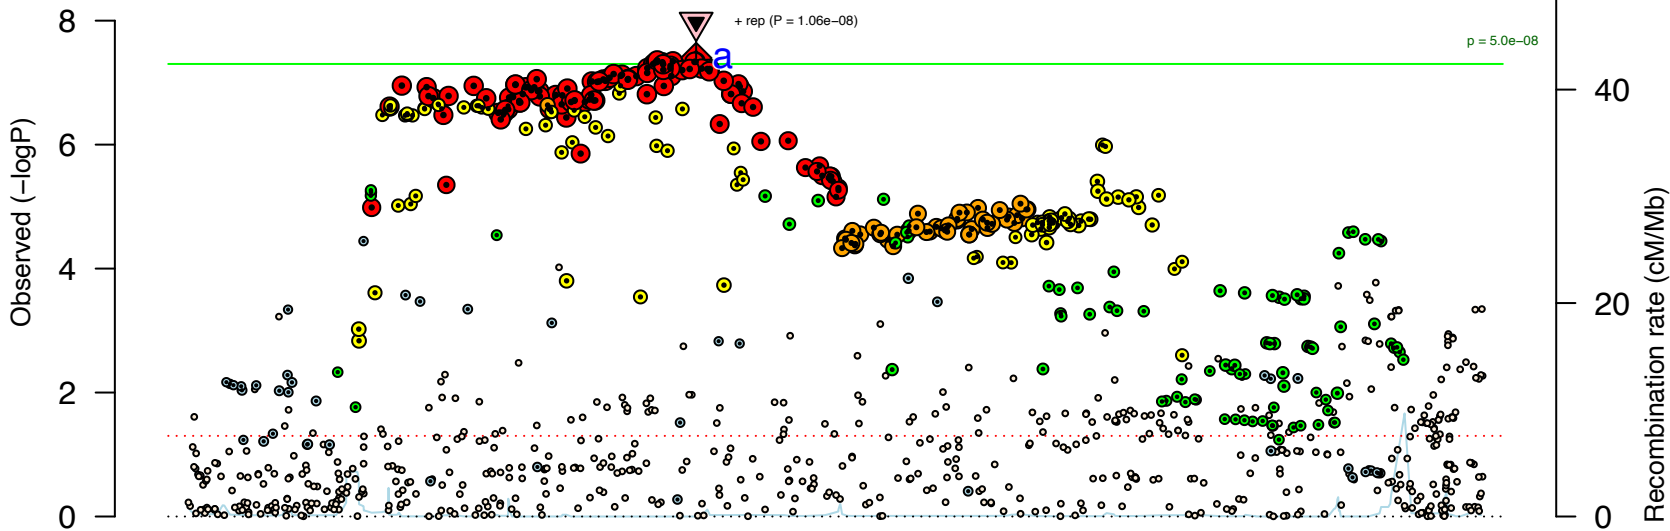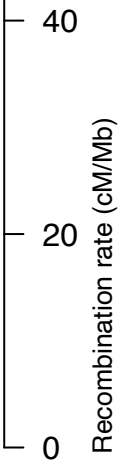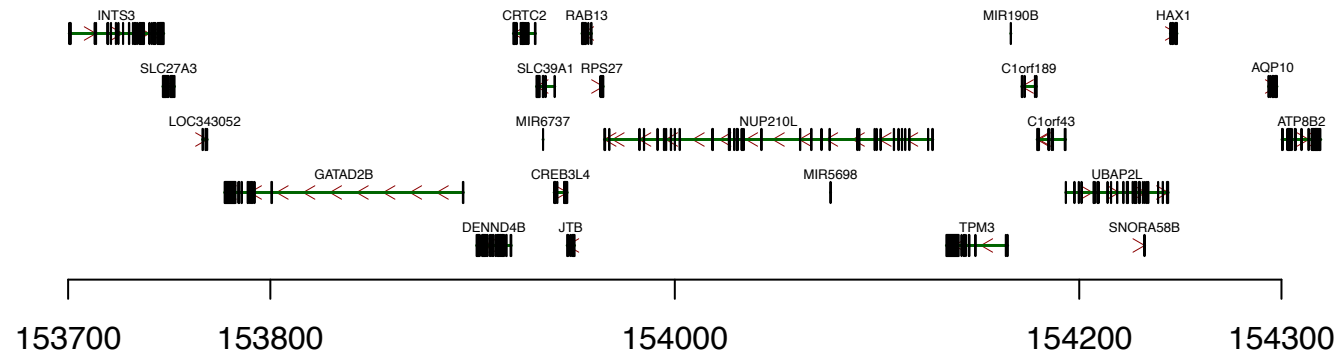

Chromosome 1 (kb)

# PGC\_SCZ\_w3\_90\_0418b.204.chr17



snp / p / or / maf / info / directions  
 a . rs11263770 / 1.74e-08 / 0.96 / 0.45 / 0.97 / 0-3-0

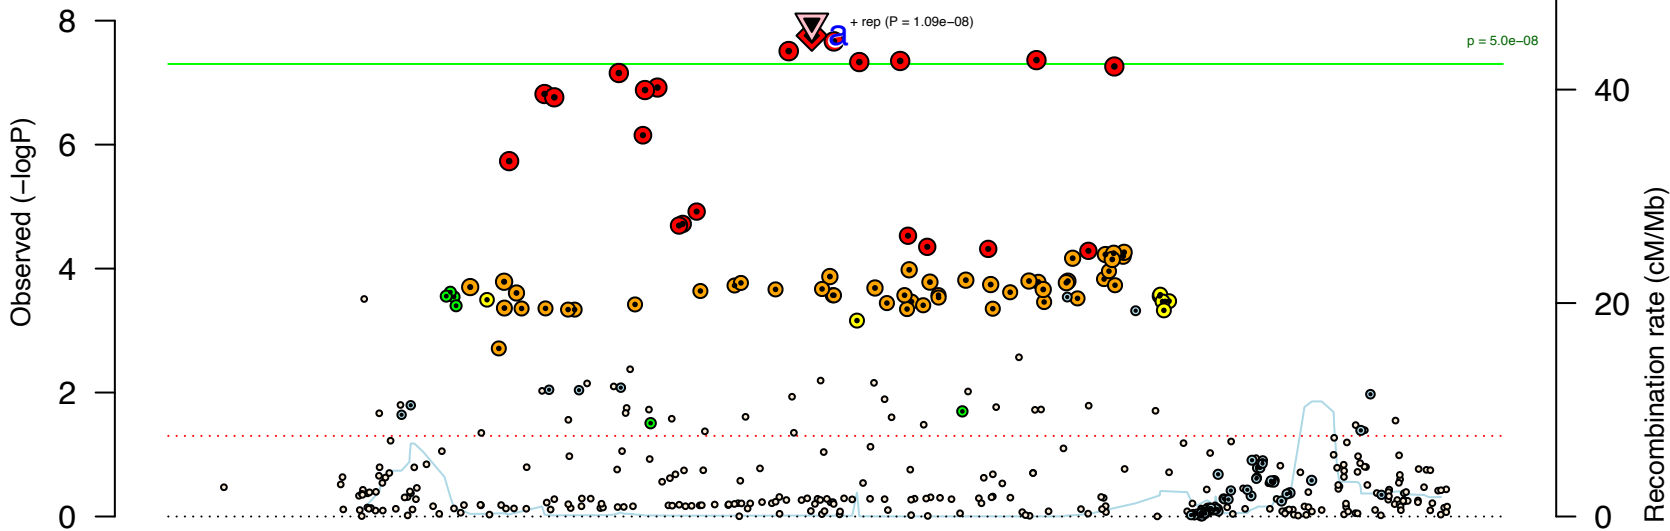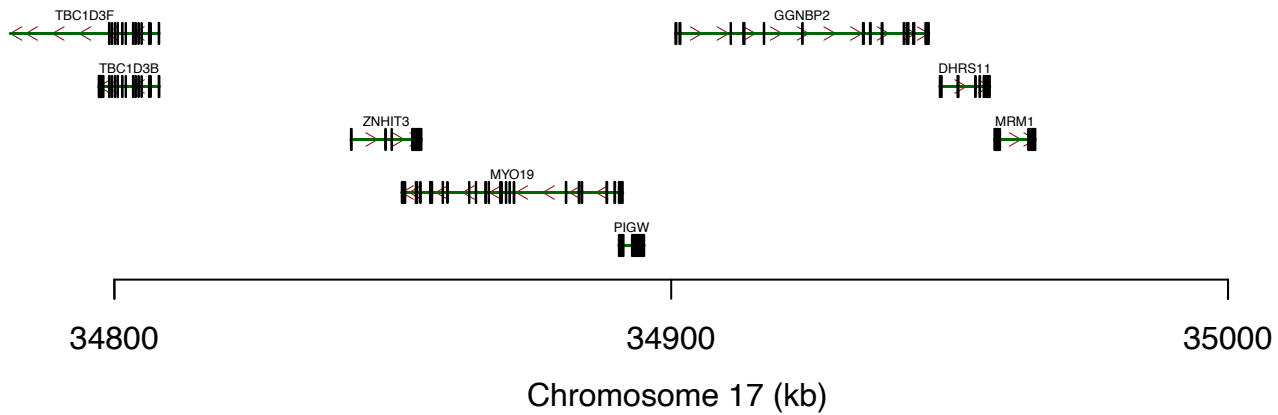



# PGC\_SCZ\_w3\_90\_0418b.205.chr2

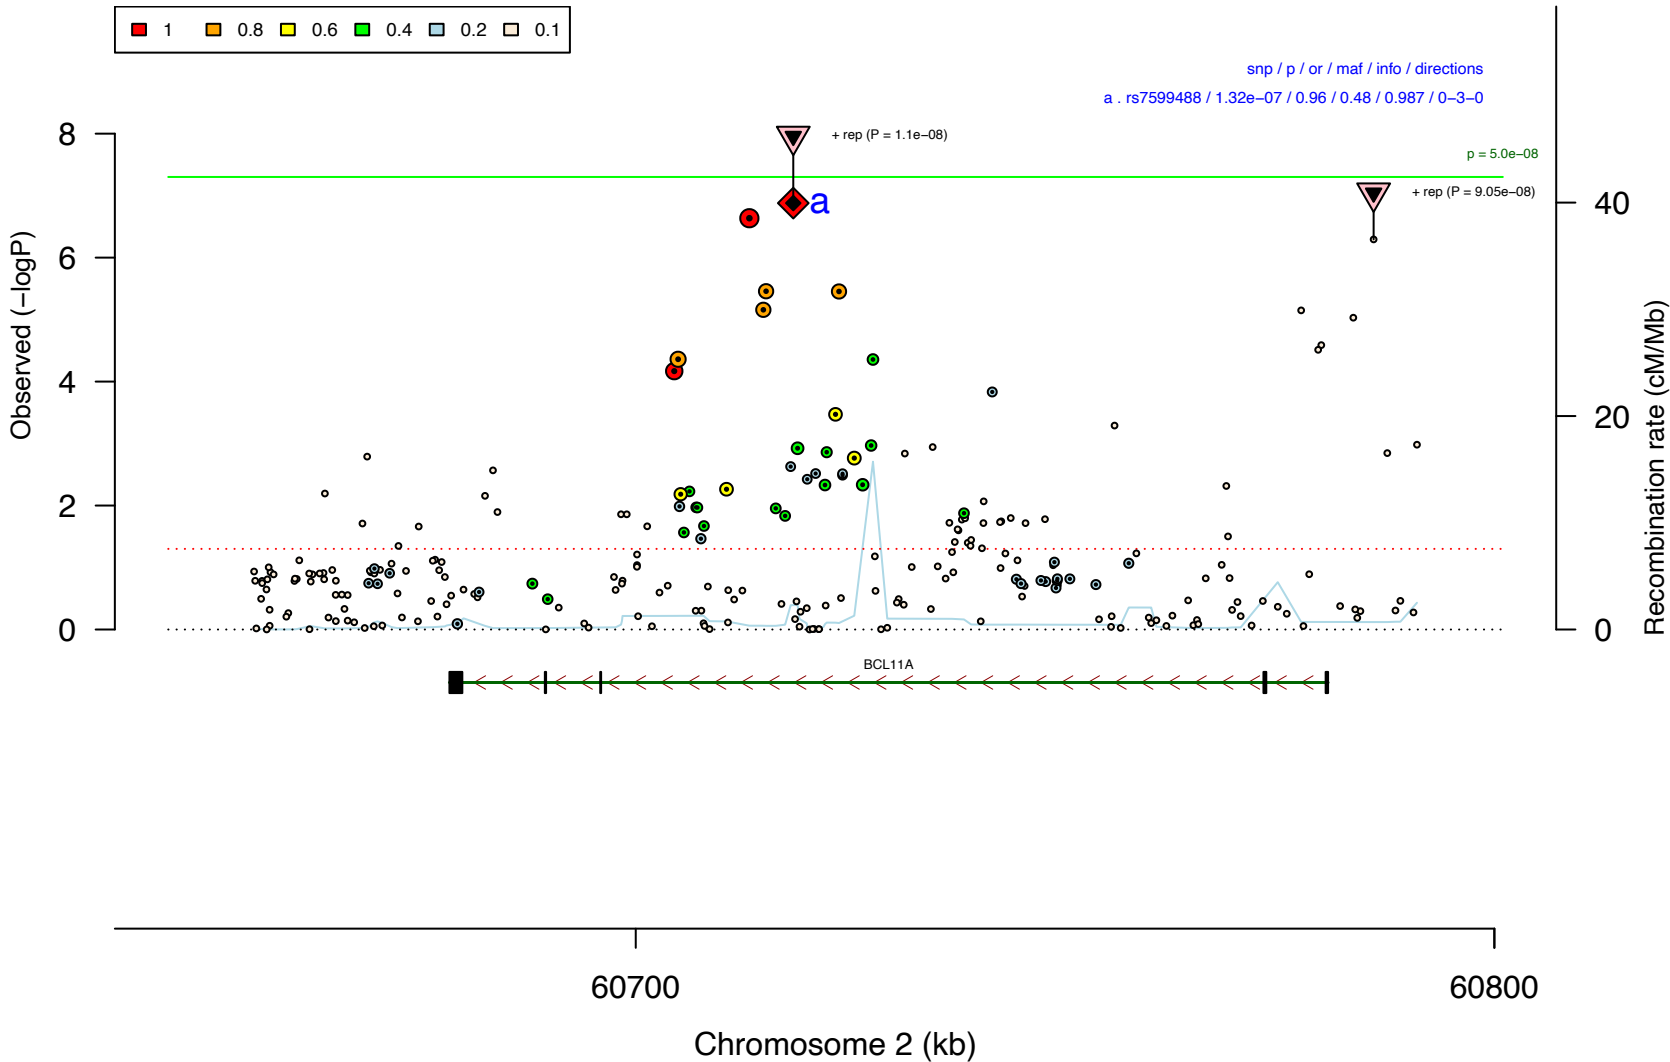

# PGC\_SCZ\_w3\_90\_0418b.206.chr8

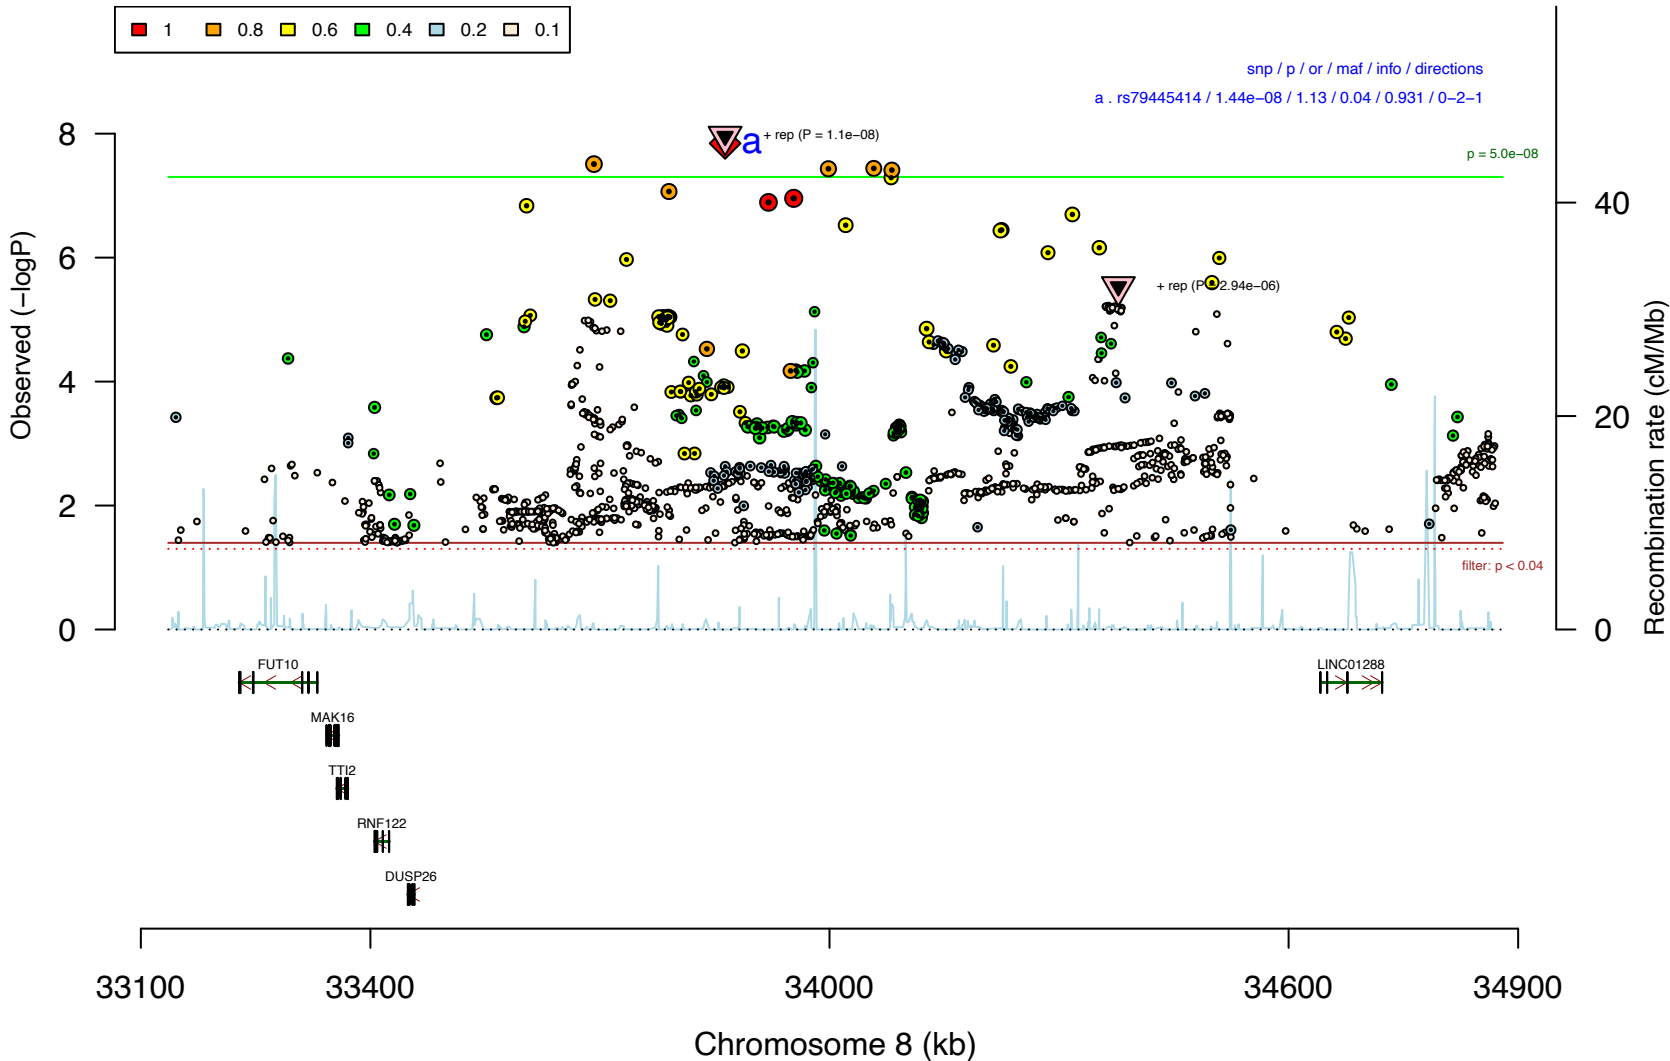

# PGC\_SCZ\_w3\_90\_0418b.207.chr22



snp / p / or / maf / info / directions

a . rs6010045 / 1.60e-08 / 0.96 / 0.33 / 0.954 / 0-3-0

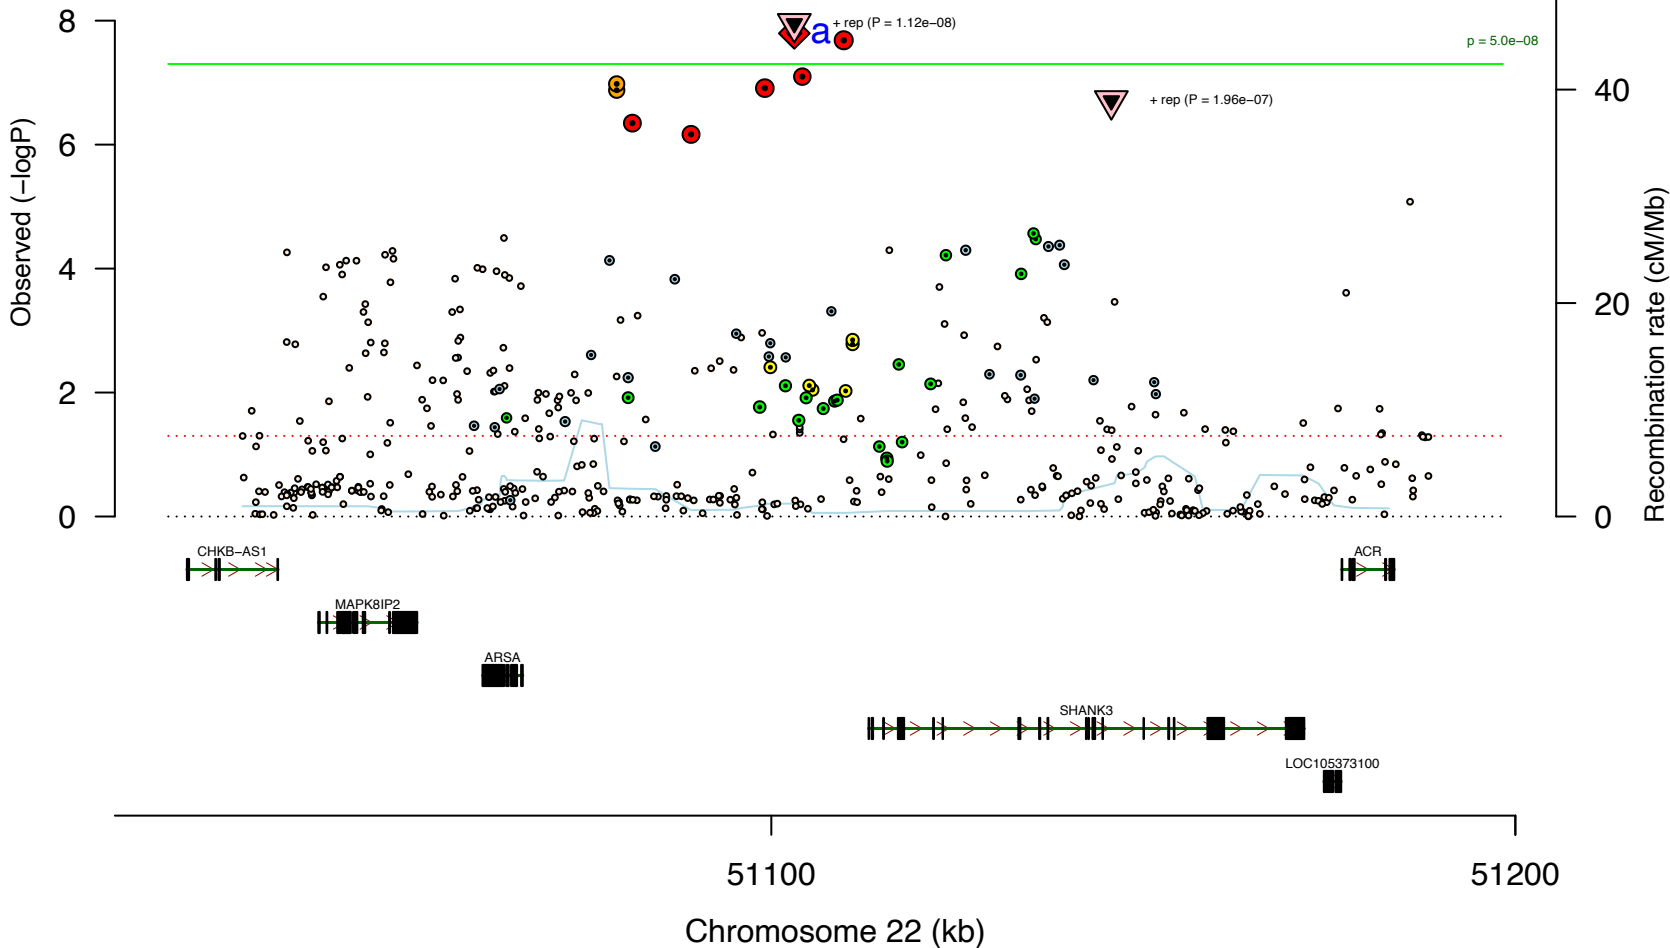

# PGC\_SCZ\_w3\_90\_0418b.208.chr5

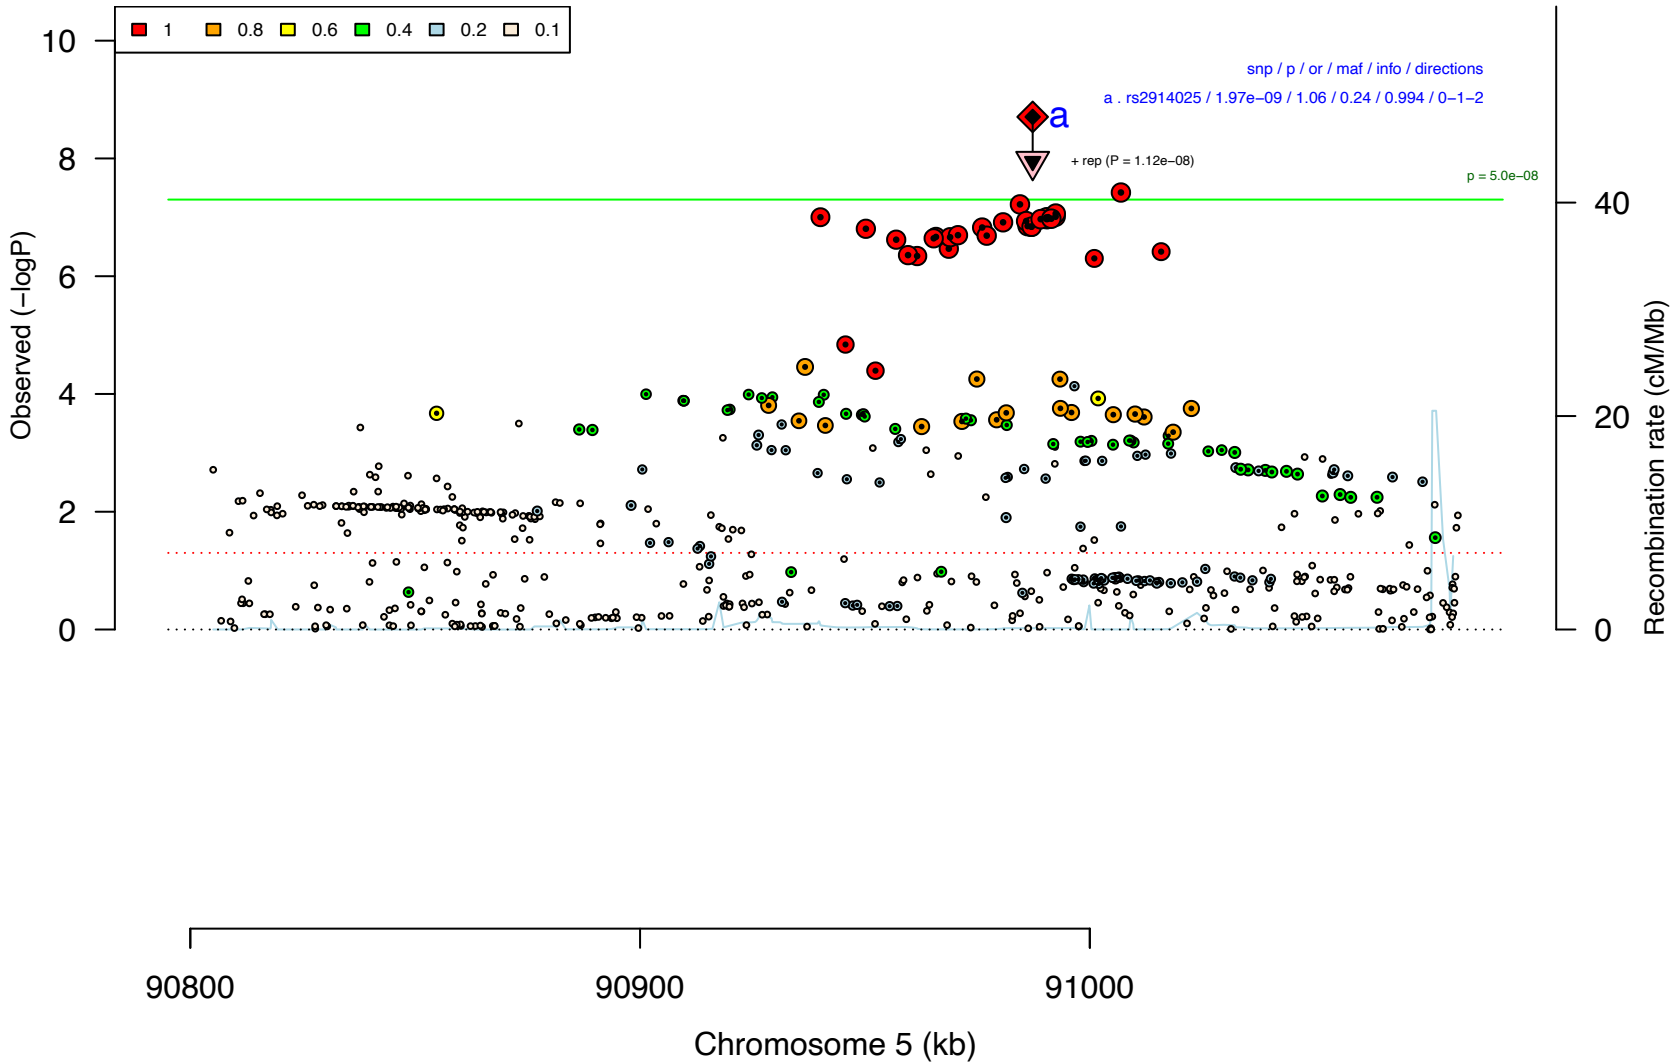

# PGC\_SCZ\_w3\_90\_0418b.209.chr6

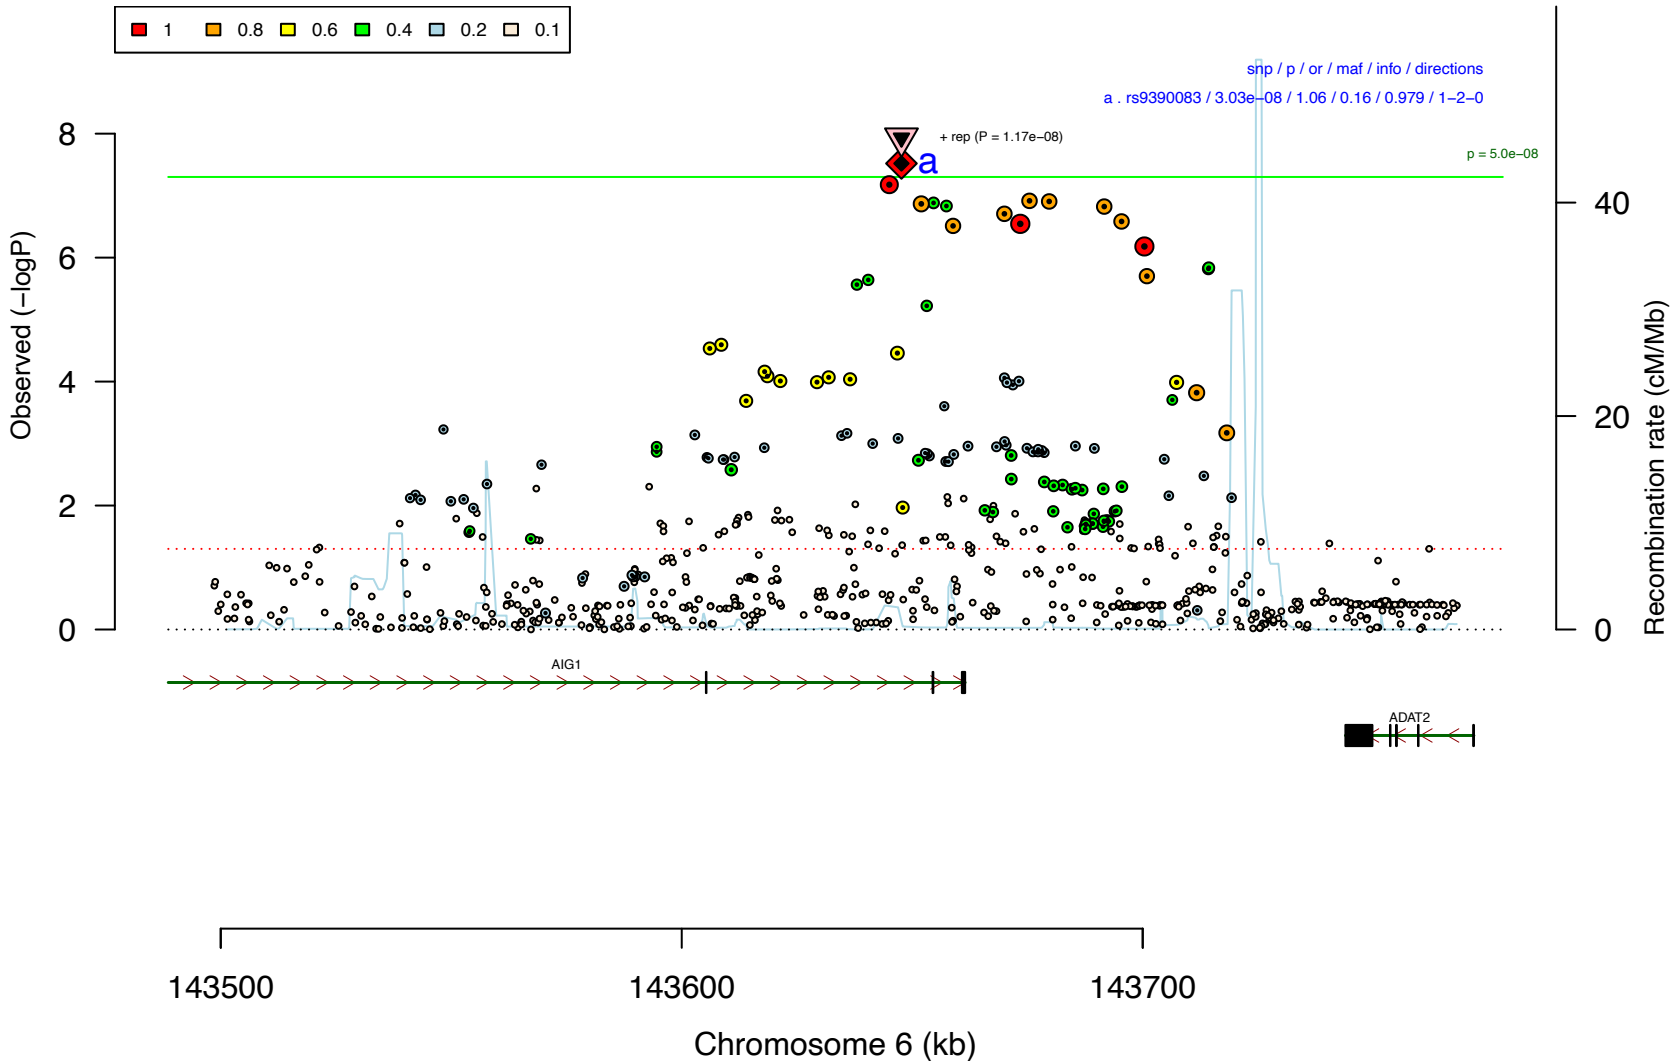

# PGC\_SCZ\_w3\_90\_0418b.210.chr9

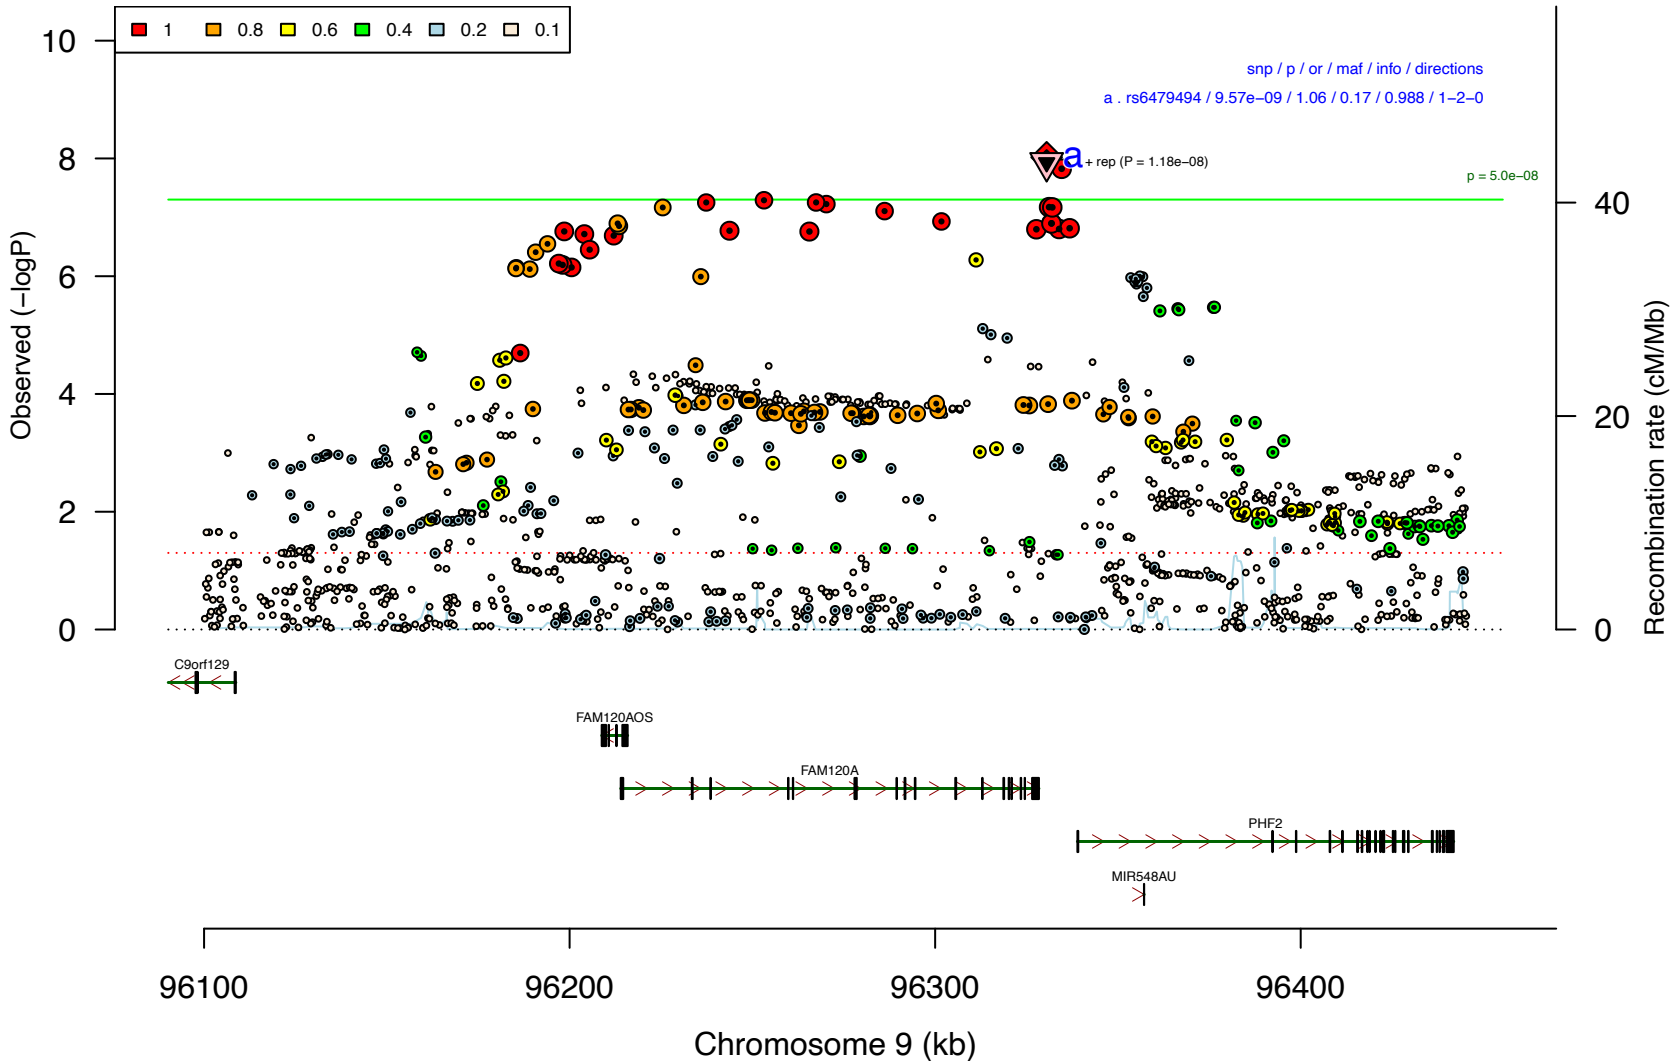

# PGC\_SCZ\_w3\_90\_0418b.211.chr2



snp / p / or / maf / info / directions

a . rs34181670 / 1.13e-08 / 0.95 / 0.31 / 0.992 / 3-0-0

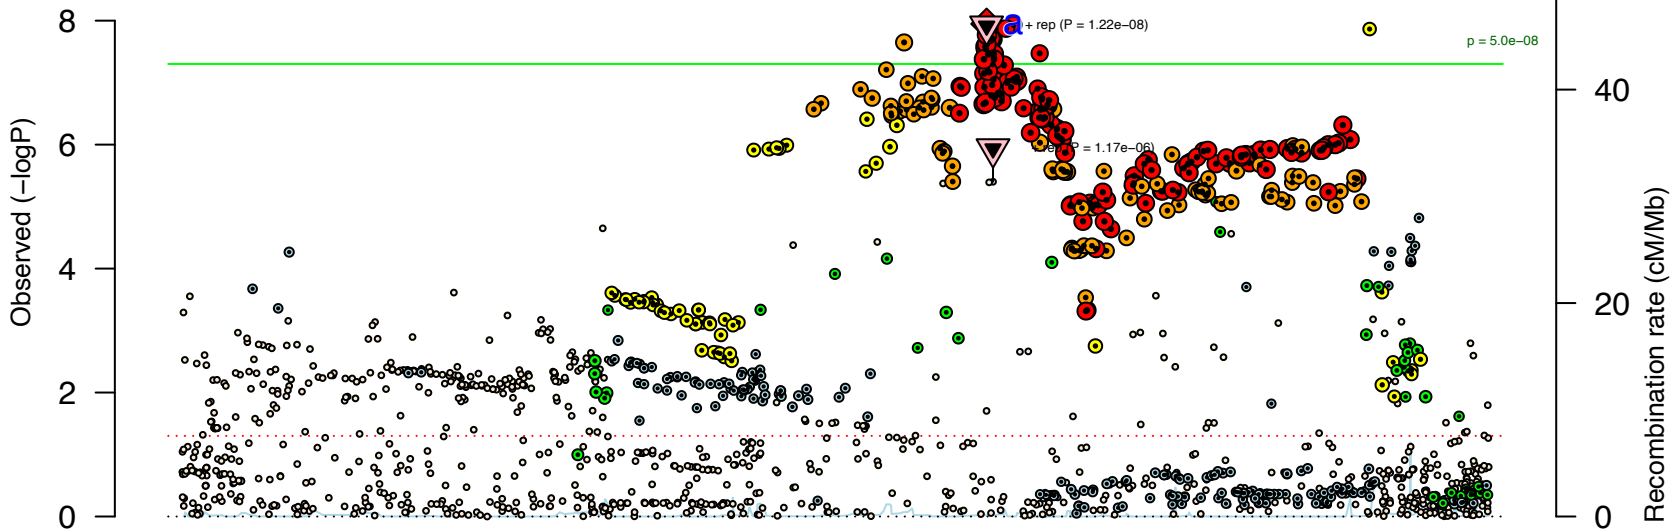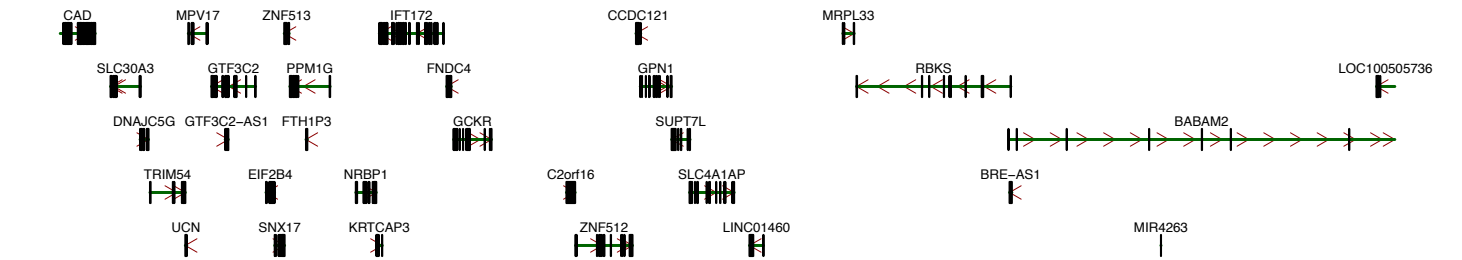

27600 27900 28200 28400

Chromosome 2 (kb)

# PGC\_SCZ\_w3\_90\_0418b.212.chr13

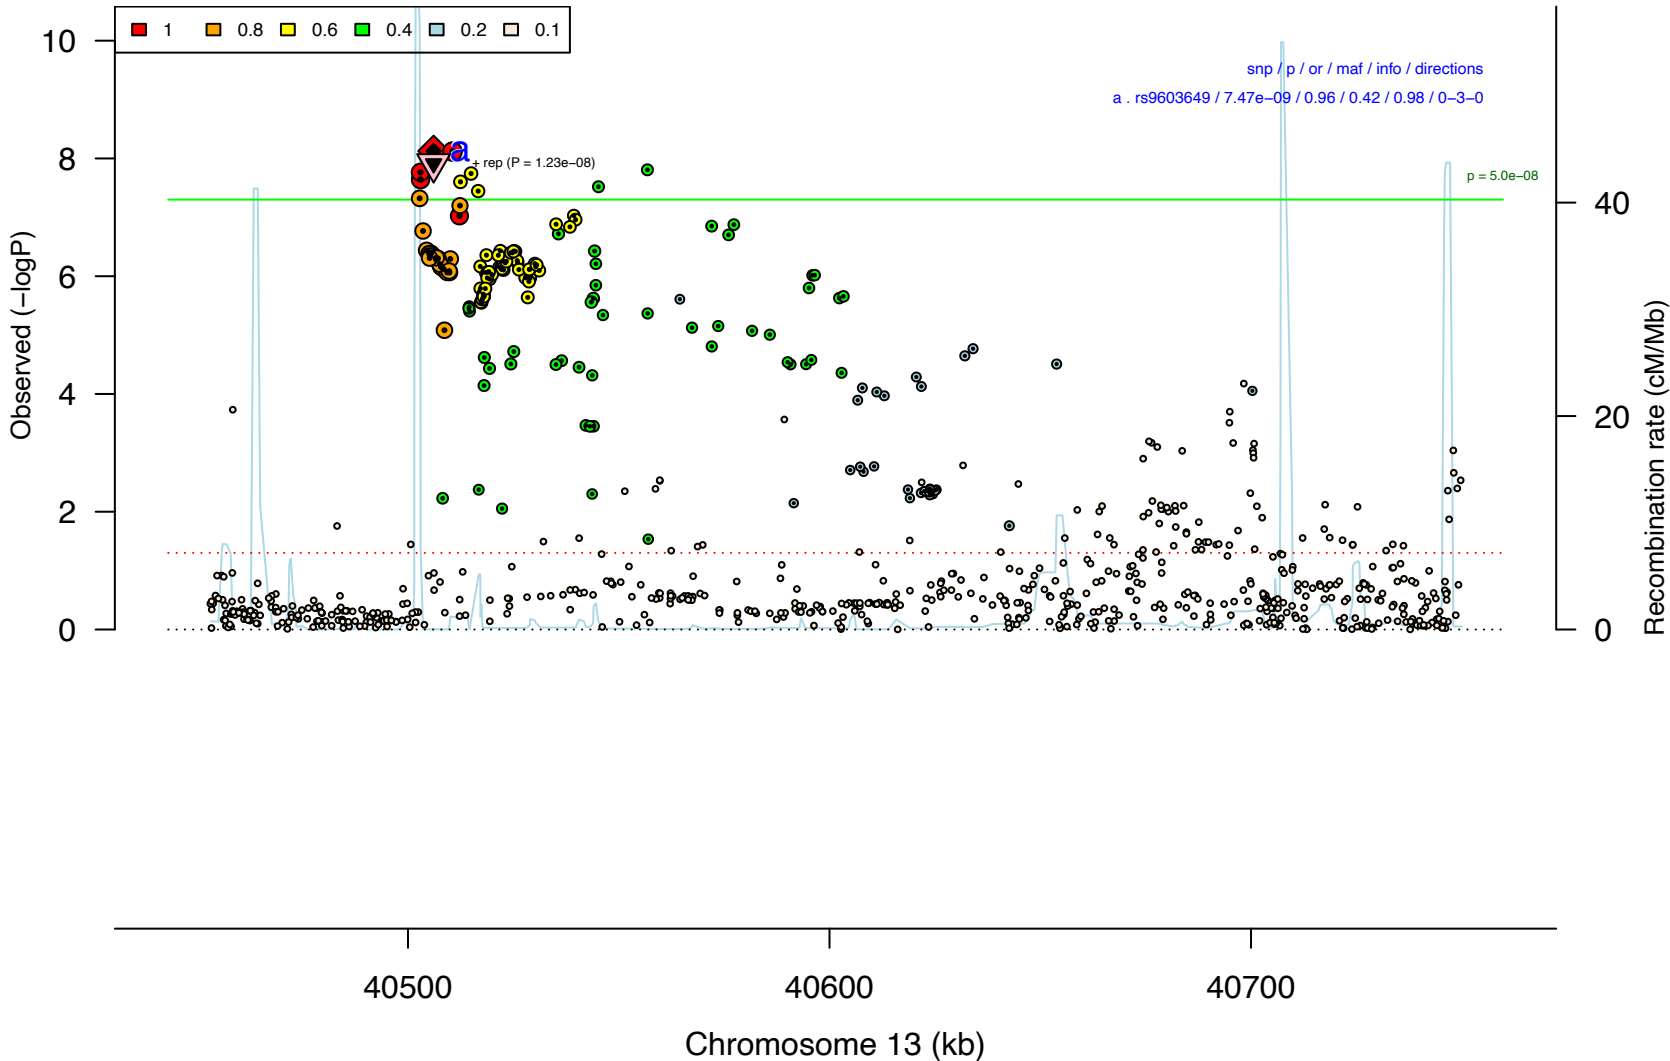



# PGC\_SCZ\_w3\_90\_0418b.213.chr2

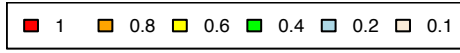

snp / p / or / maf / info / directions  
a . rs12476312 / 1.68e-08 / 0.96 / 0.38 / 0.998 / 0-3-0

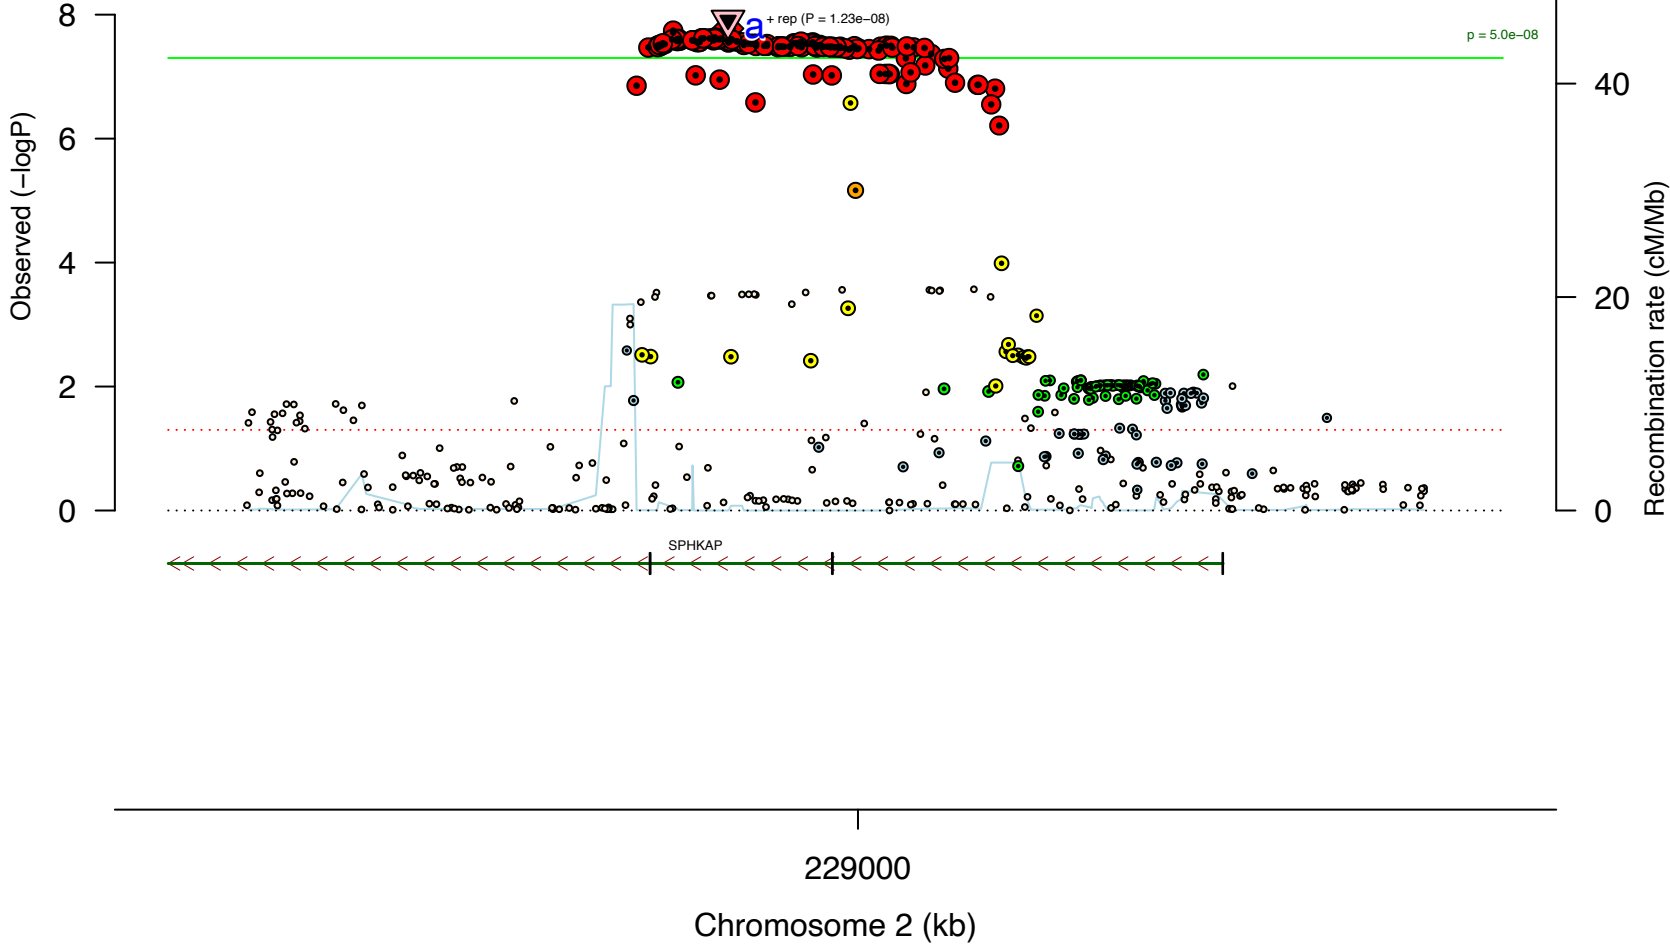

# PGC\_SCZ\_w3\_90\_0418b.214.chr19

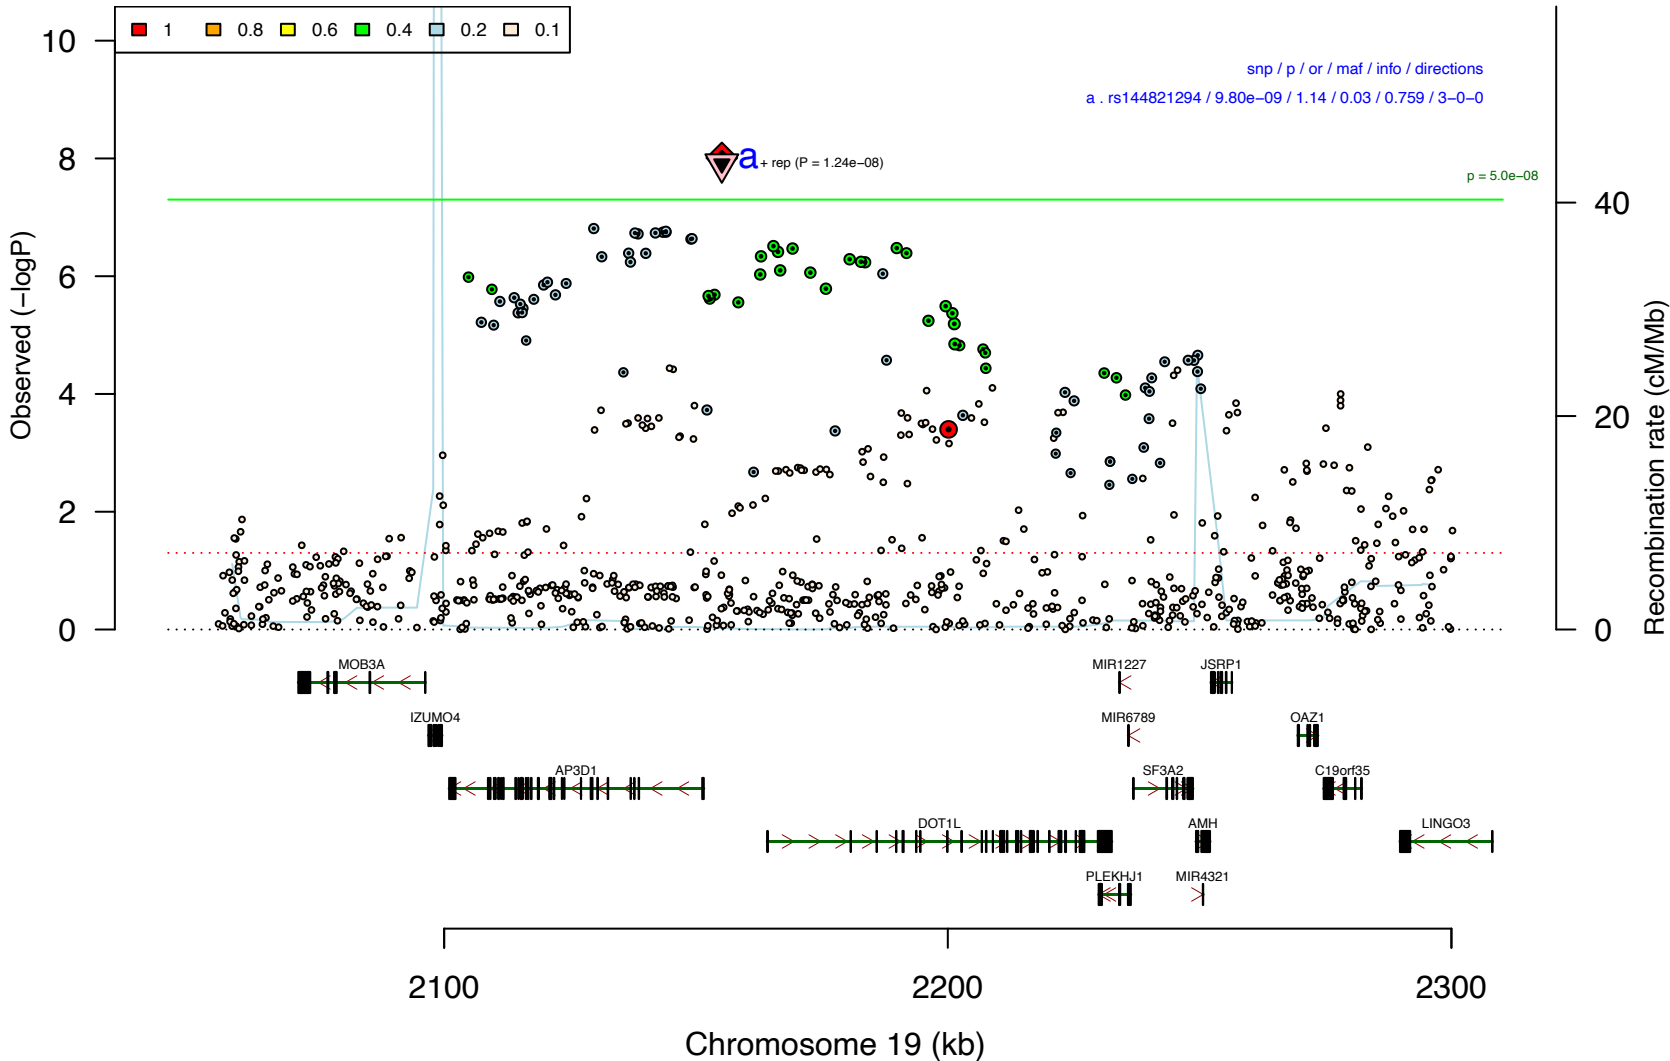

# PGC\_SCZ\_w3\_90\_0418b.215.chr1

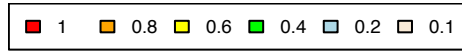

snp / p / or / maf / info / directions  
 a . rs41314284 / 6.39e-08 / 1.08 / 0.07 / 0.961 / 2-1-0

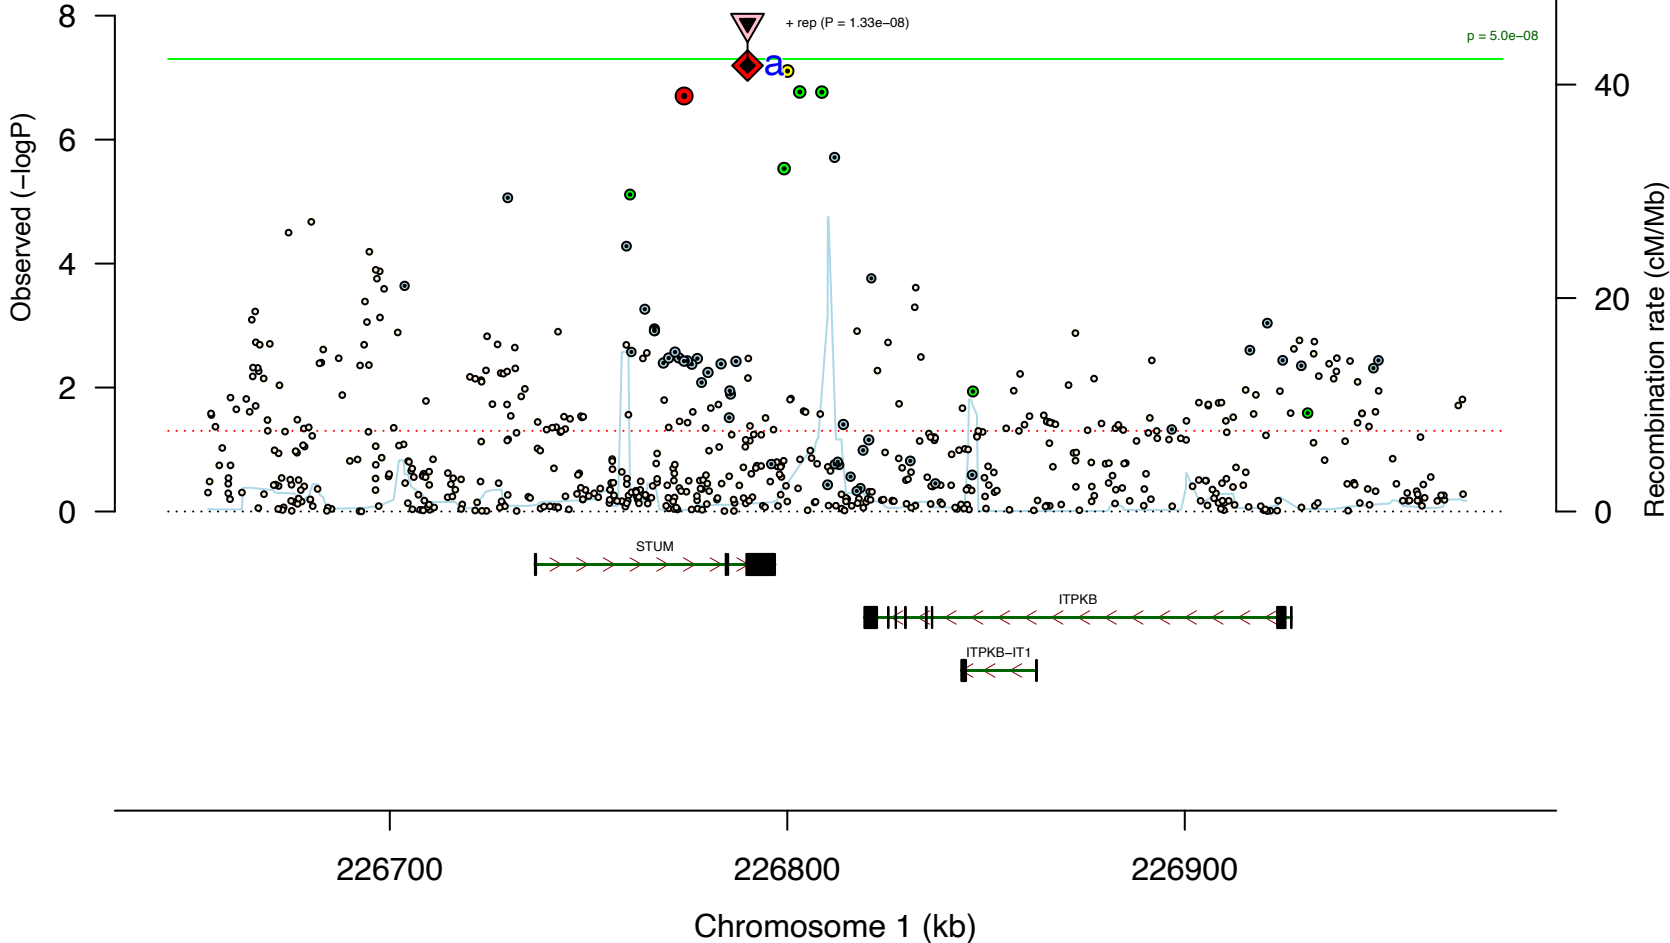

# PGC\_SCZ\_w3\_90\_0418b.216.chr2



snp / p / or / maf / info / directions  
a . rs2033996 / 4.33e-08 / 1.05 / 0.20 / 0.995 / 2-1-0

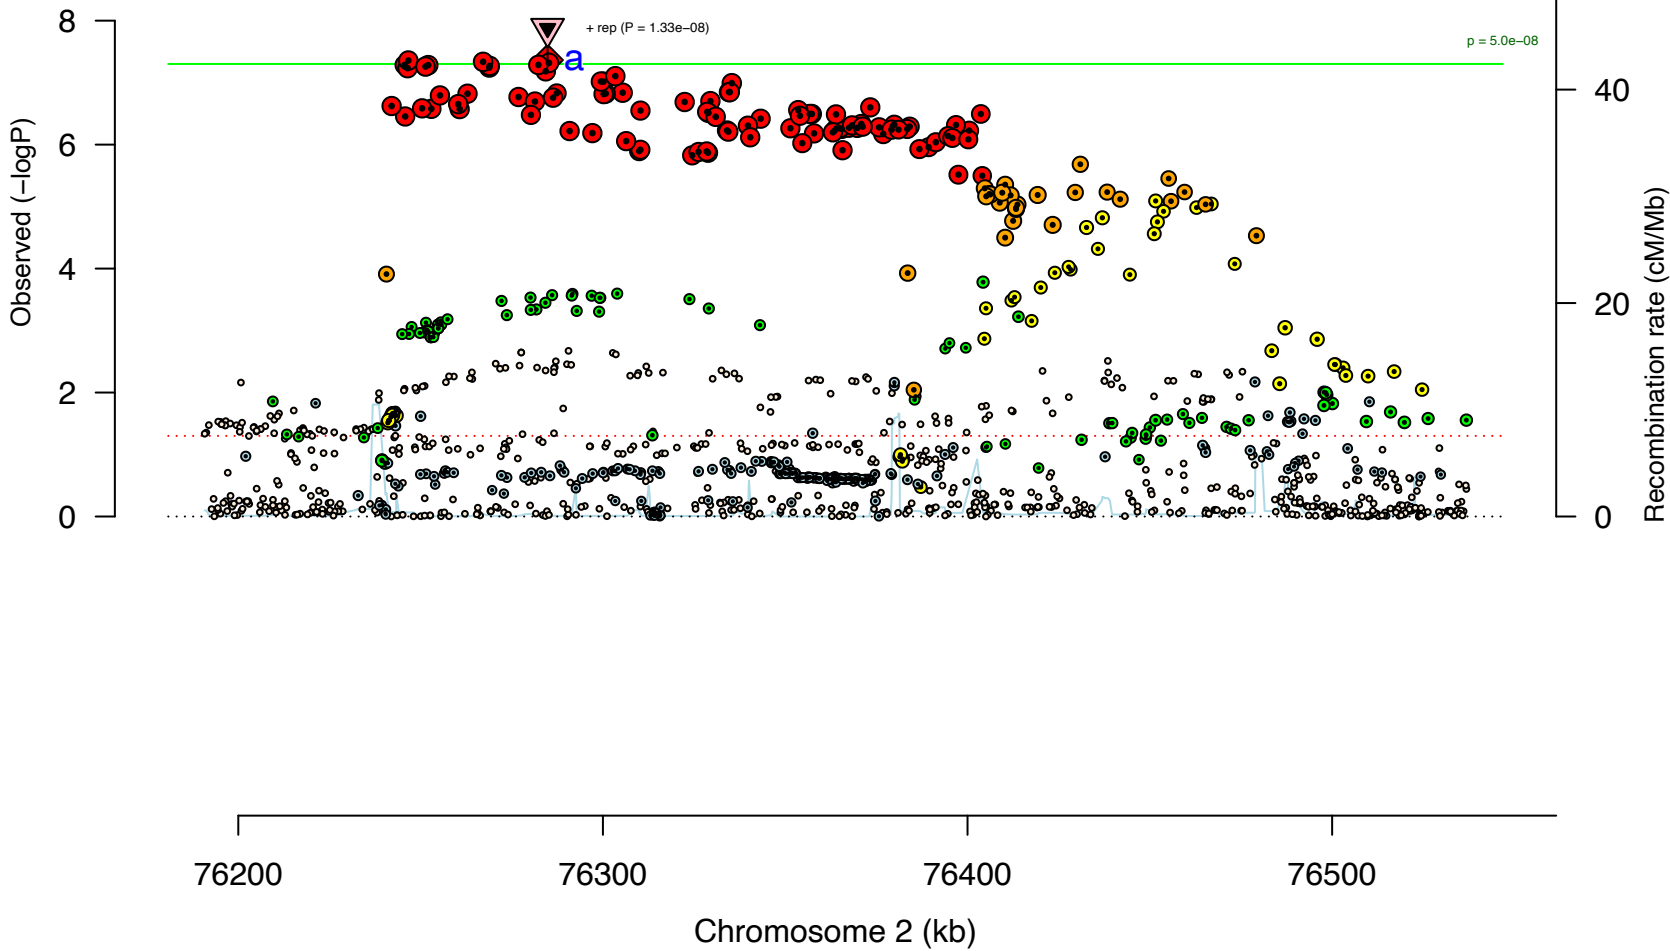

# PGC\_SCZ\_w3\_90\_0418b.217.chr12



snp / p / or / maf / info / directions

a . rs10777187 / 1.62e-08 / 1.05 / 0.26 / 0.948 / 3-0-0

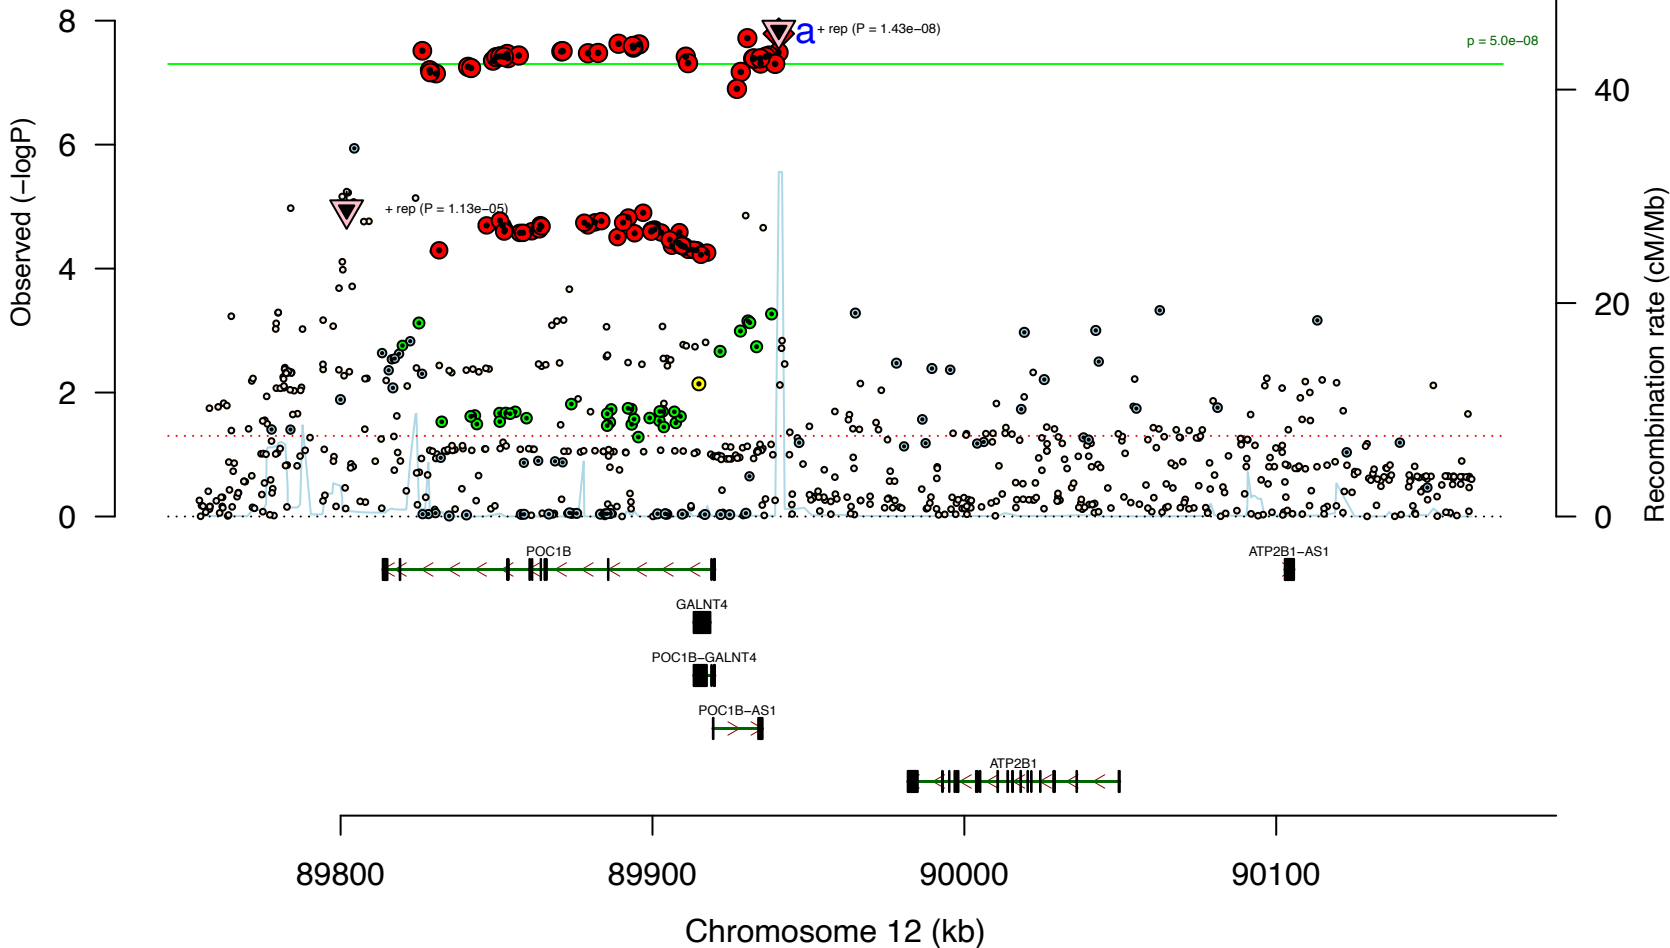

# PGC\_SCZ\_w3\_90\_0418b.218.chr12



snp / p / or / maf / info / directions

a . rs10861176 / 1.74e-08 / 0.96 / 0.30 / 0.994 / 2-1-0

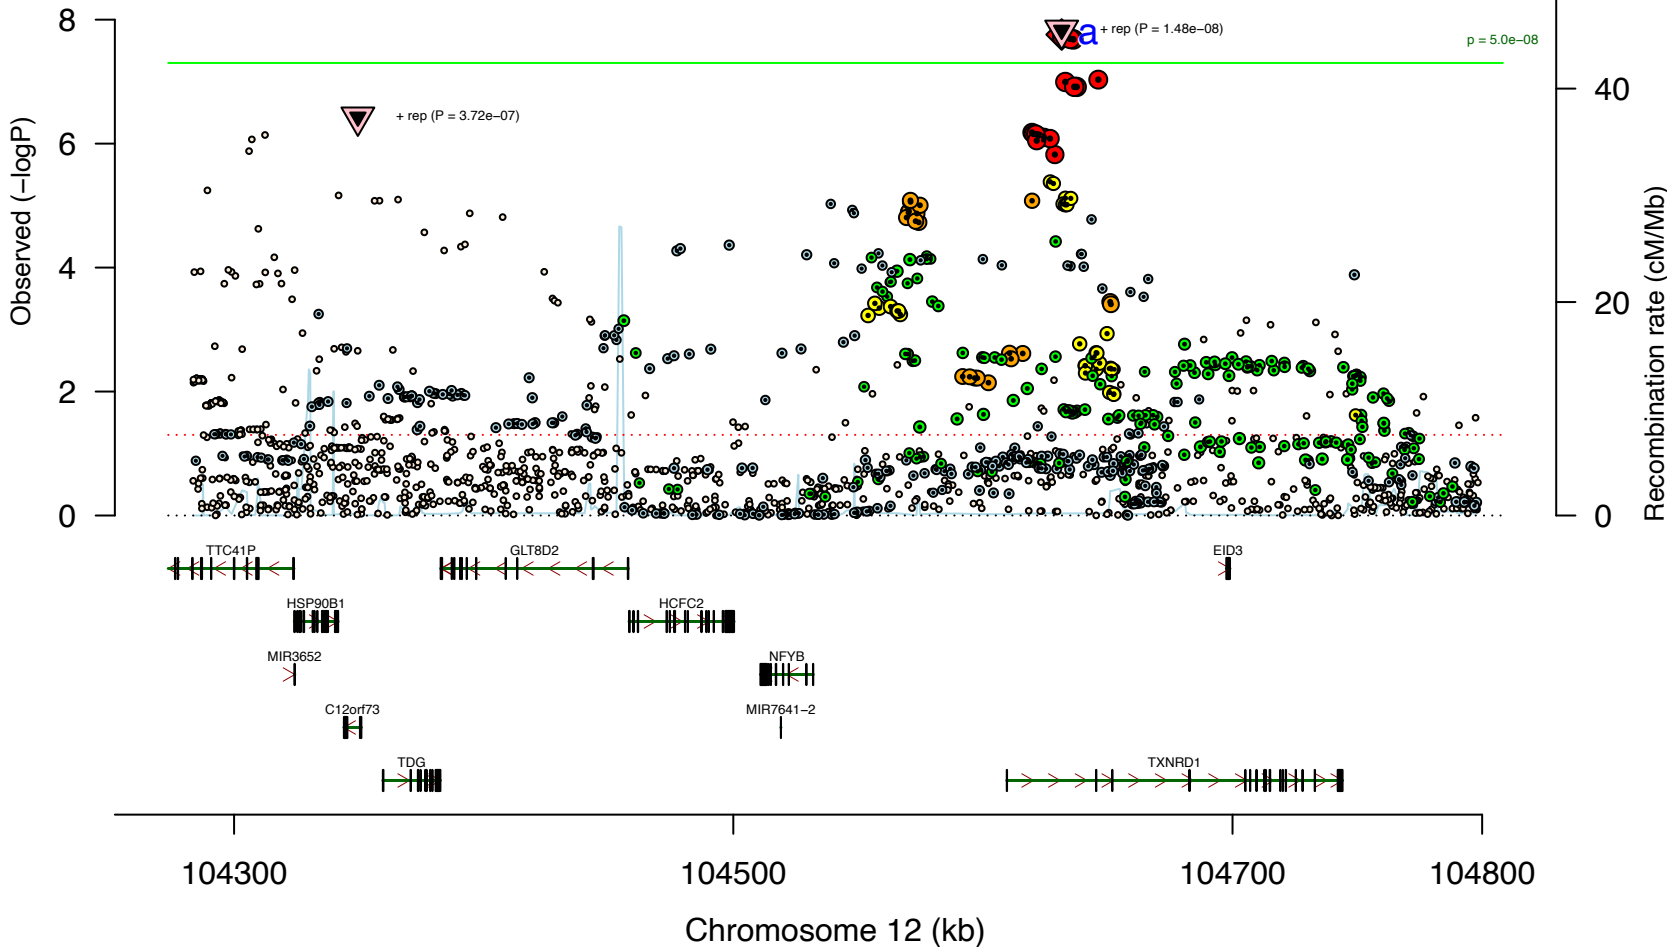

# PGC\_SCZ\_w3\_90\_0418b.219.chr7



snp / p / or / maf / info / directions  
a . rs10243922 / 6.58e-08 / 1.05 / 0.28 / 0.986 / 2-1-0

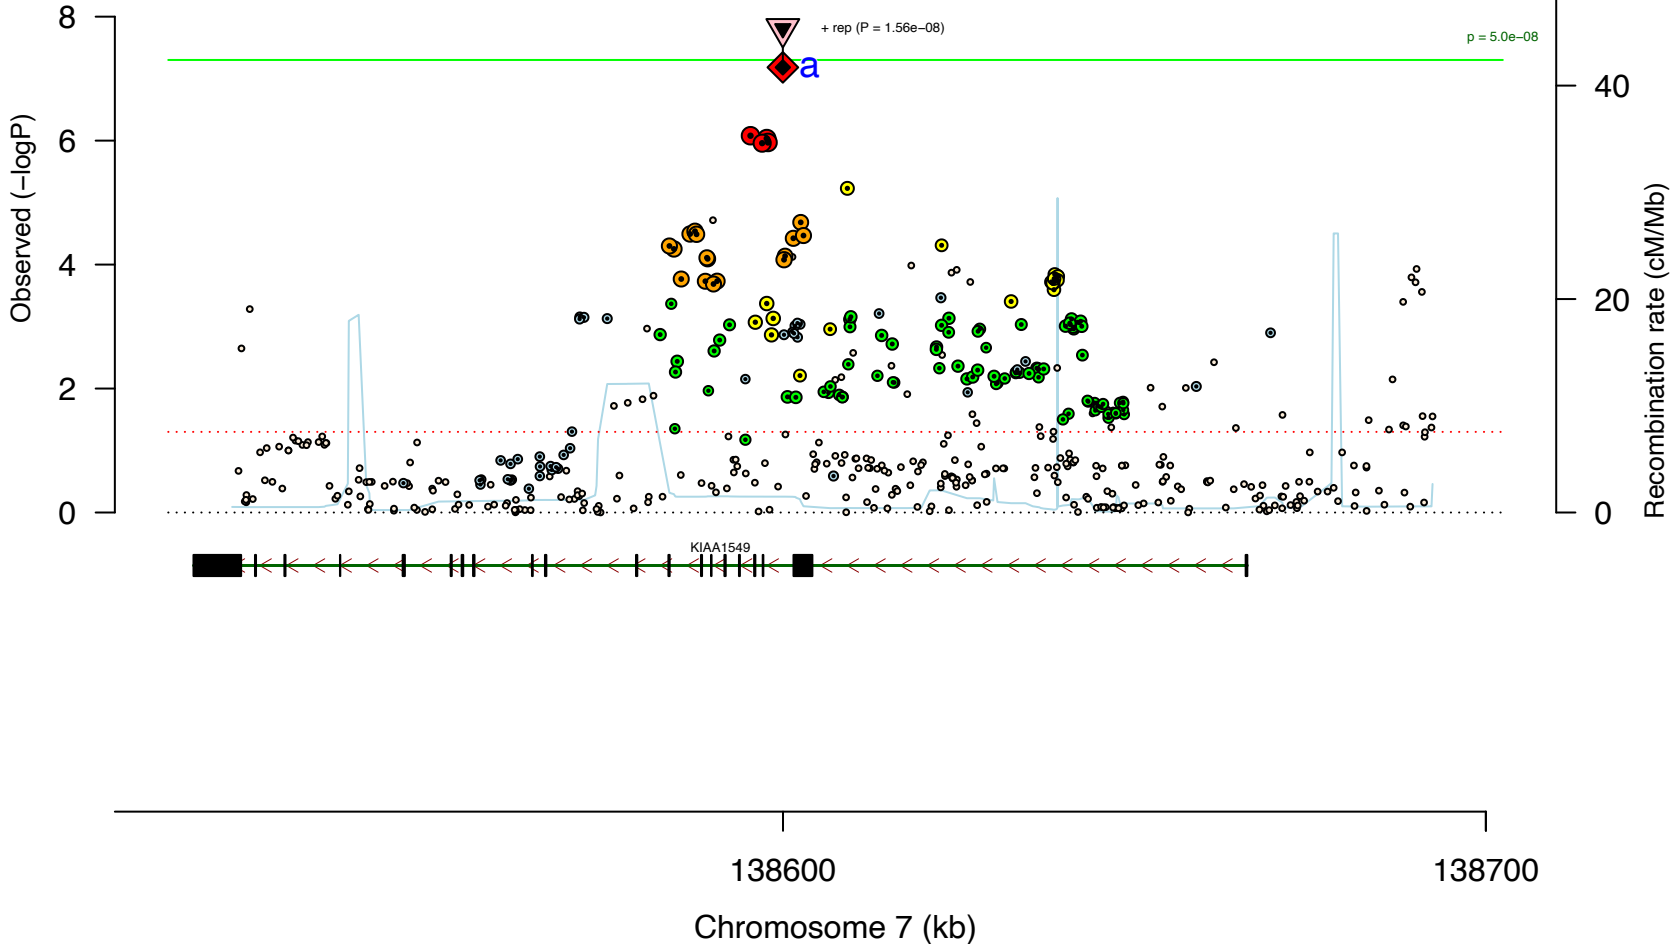

# PGC\_SCZ\_w3\_90\_0418b.220.chr2

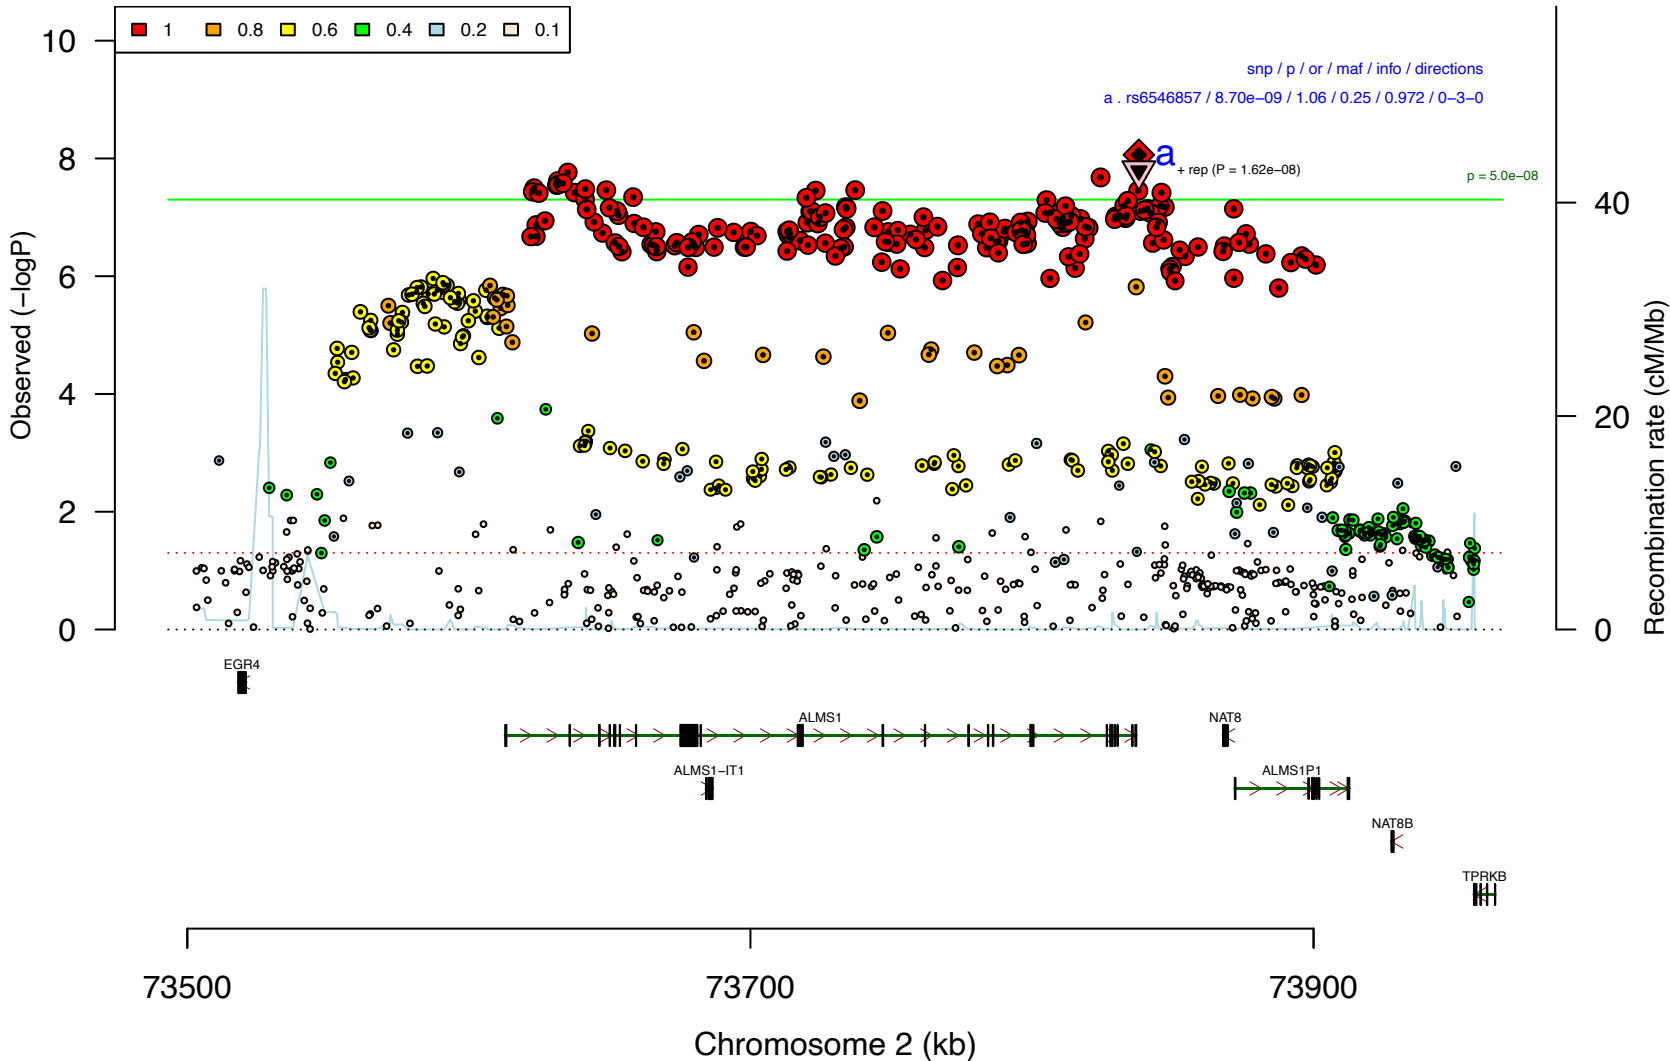



# PGC\_SCZ\_w3\_90\_0418b.221.chr12



snp / p / or / maf / info / directions

a . rs1464492 / 4.99e-08 / 1.04 / 0.49 / 0.991 / 0-3-0

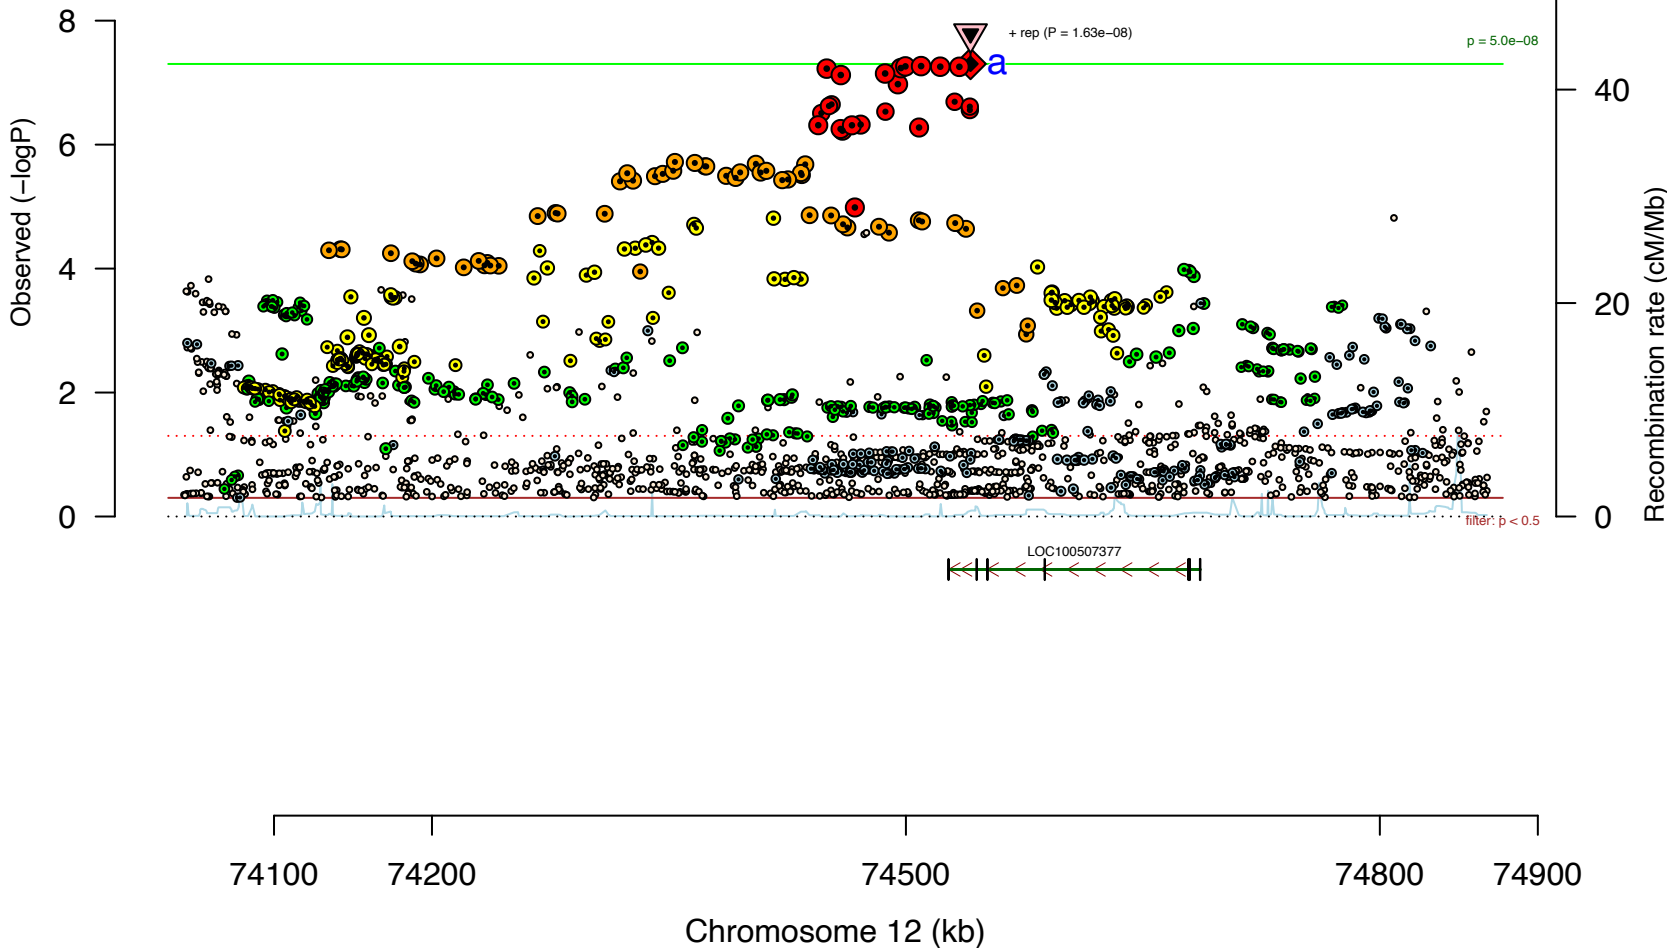

# PGC\_SCZ\_w3\_90\_0418b.222.chr6

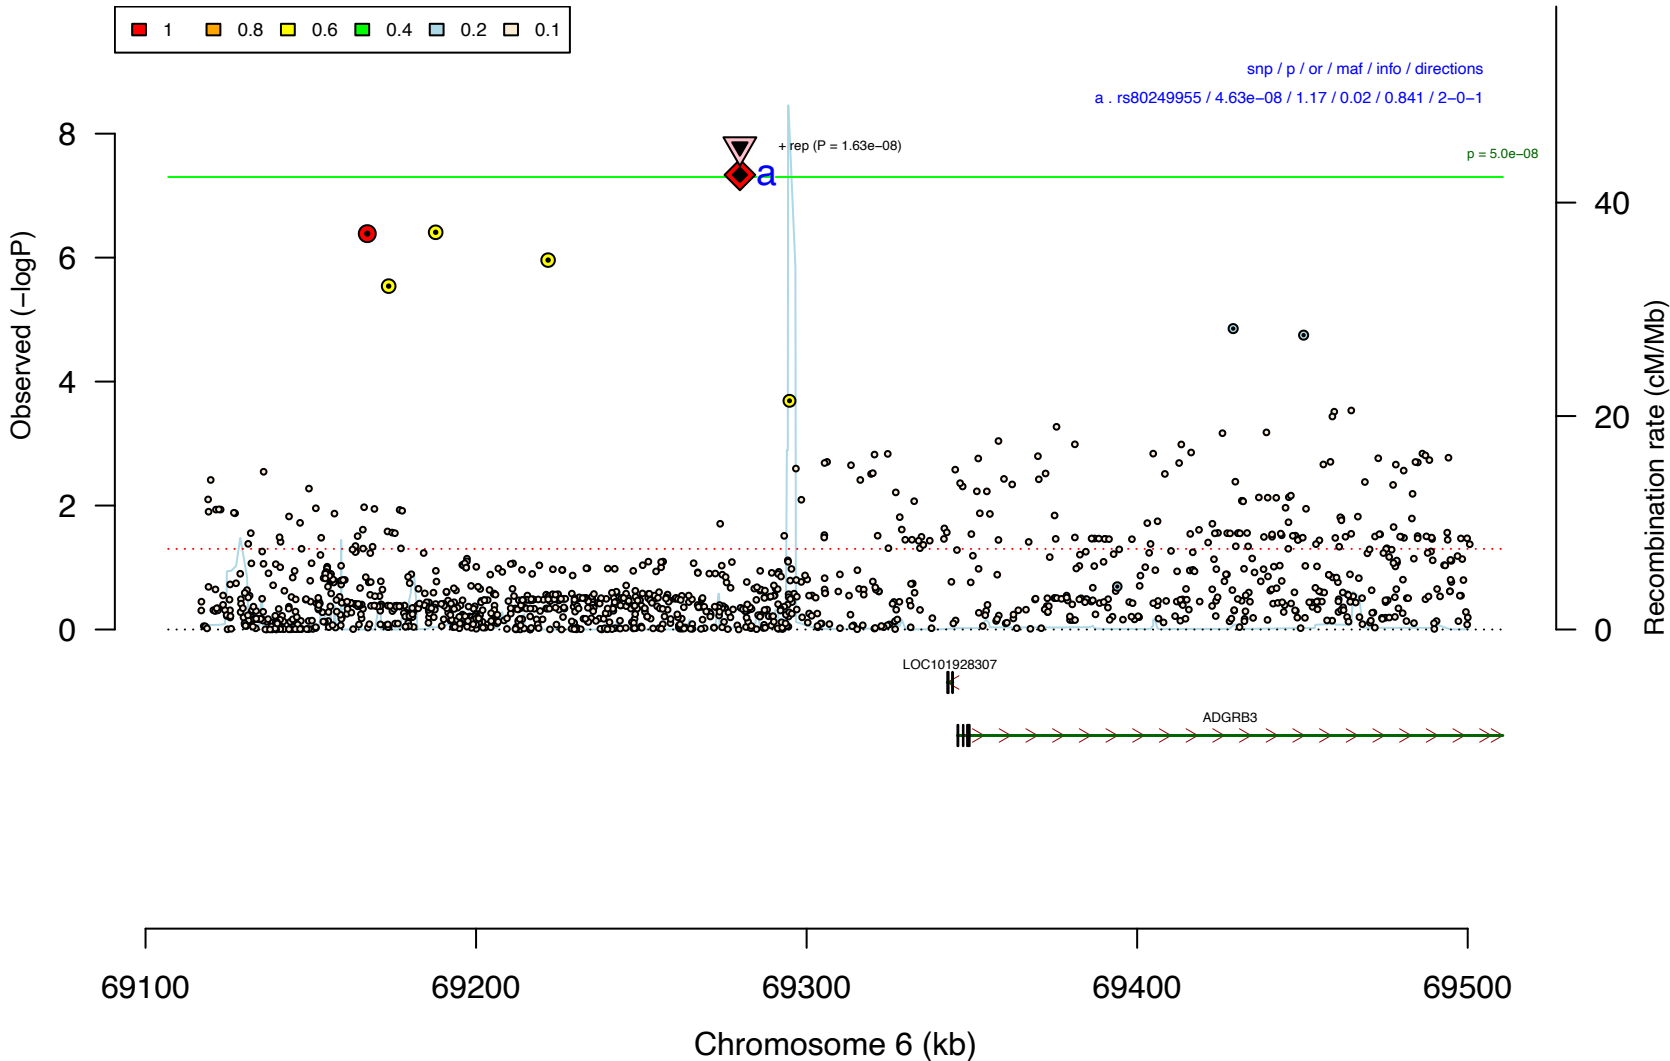

# PGC\_SCZ\_w3\_90\_0418b.223.chr4

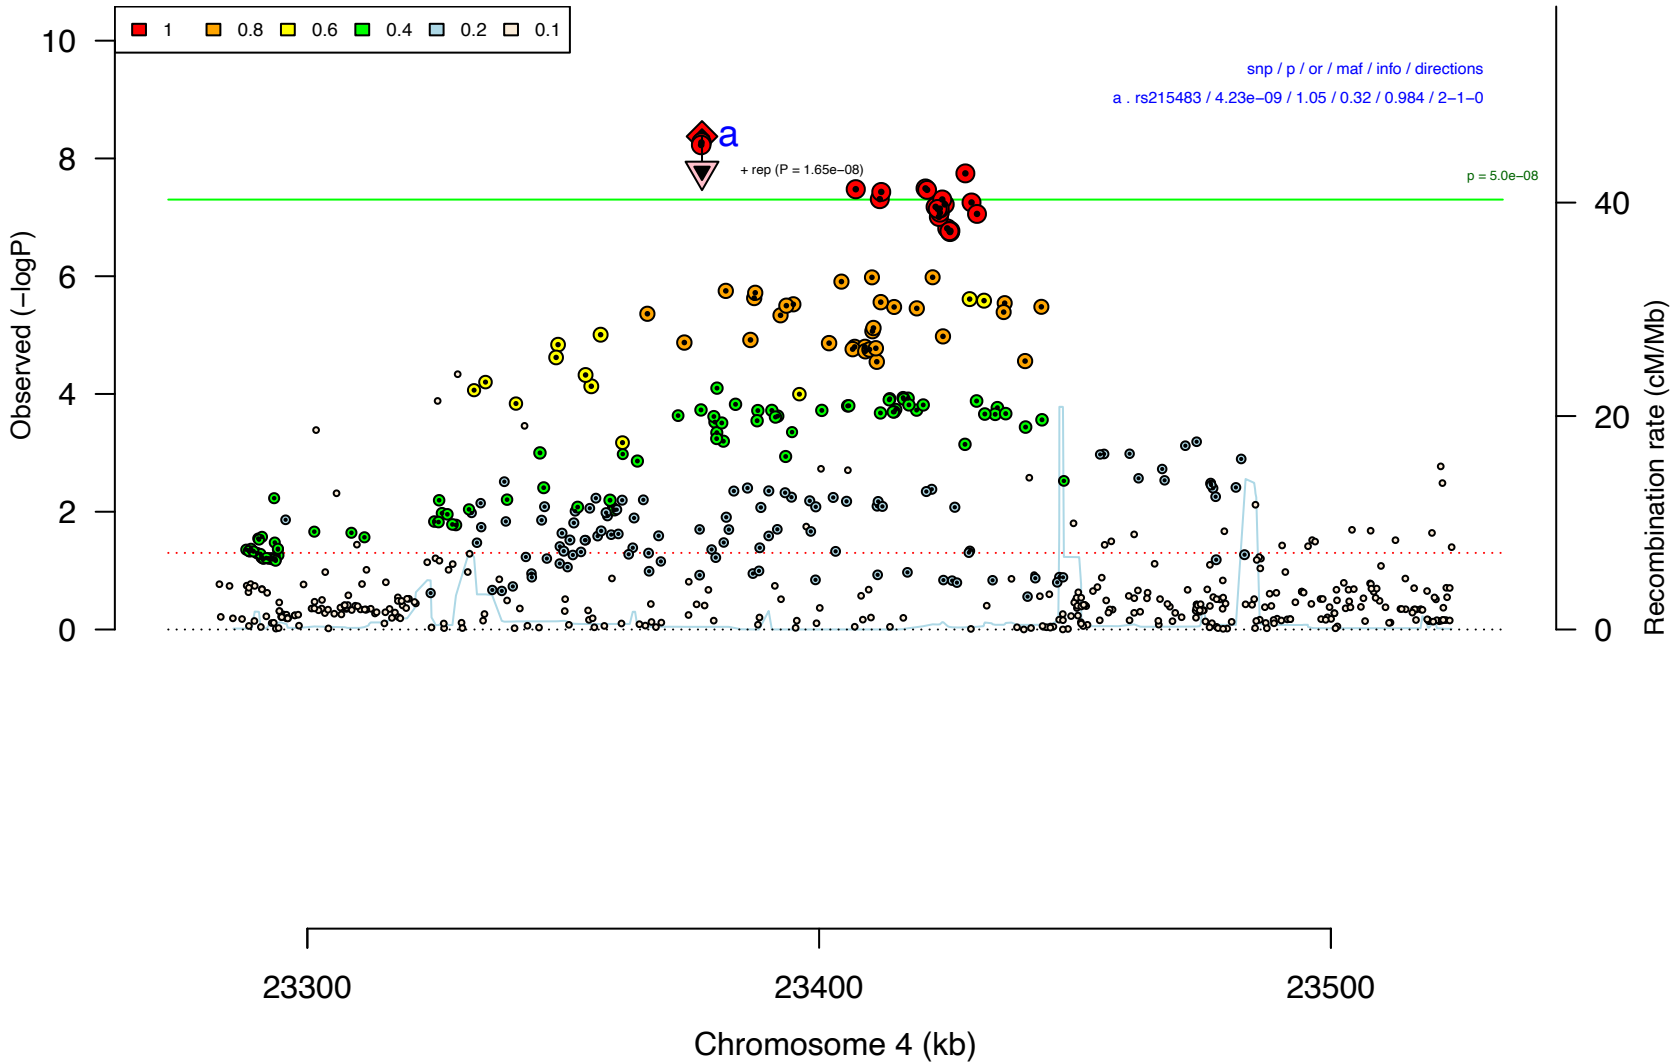

# PGC\_SCZ\_w3\_90\_0418b.224.chr16

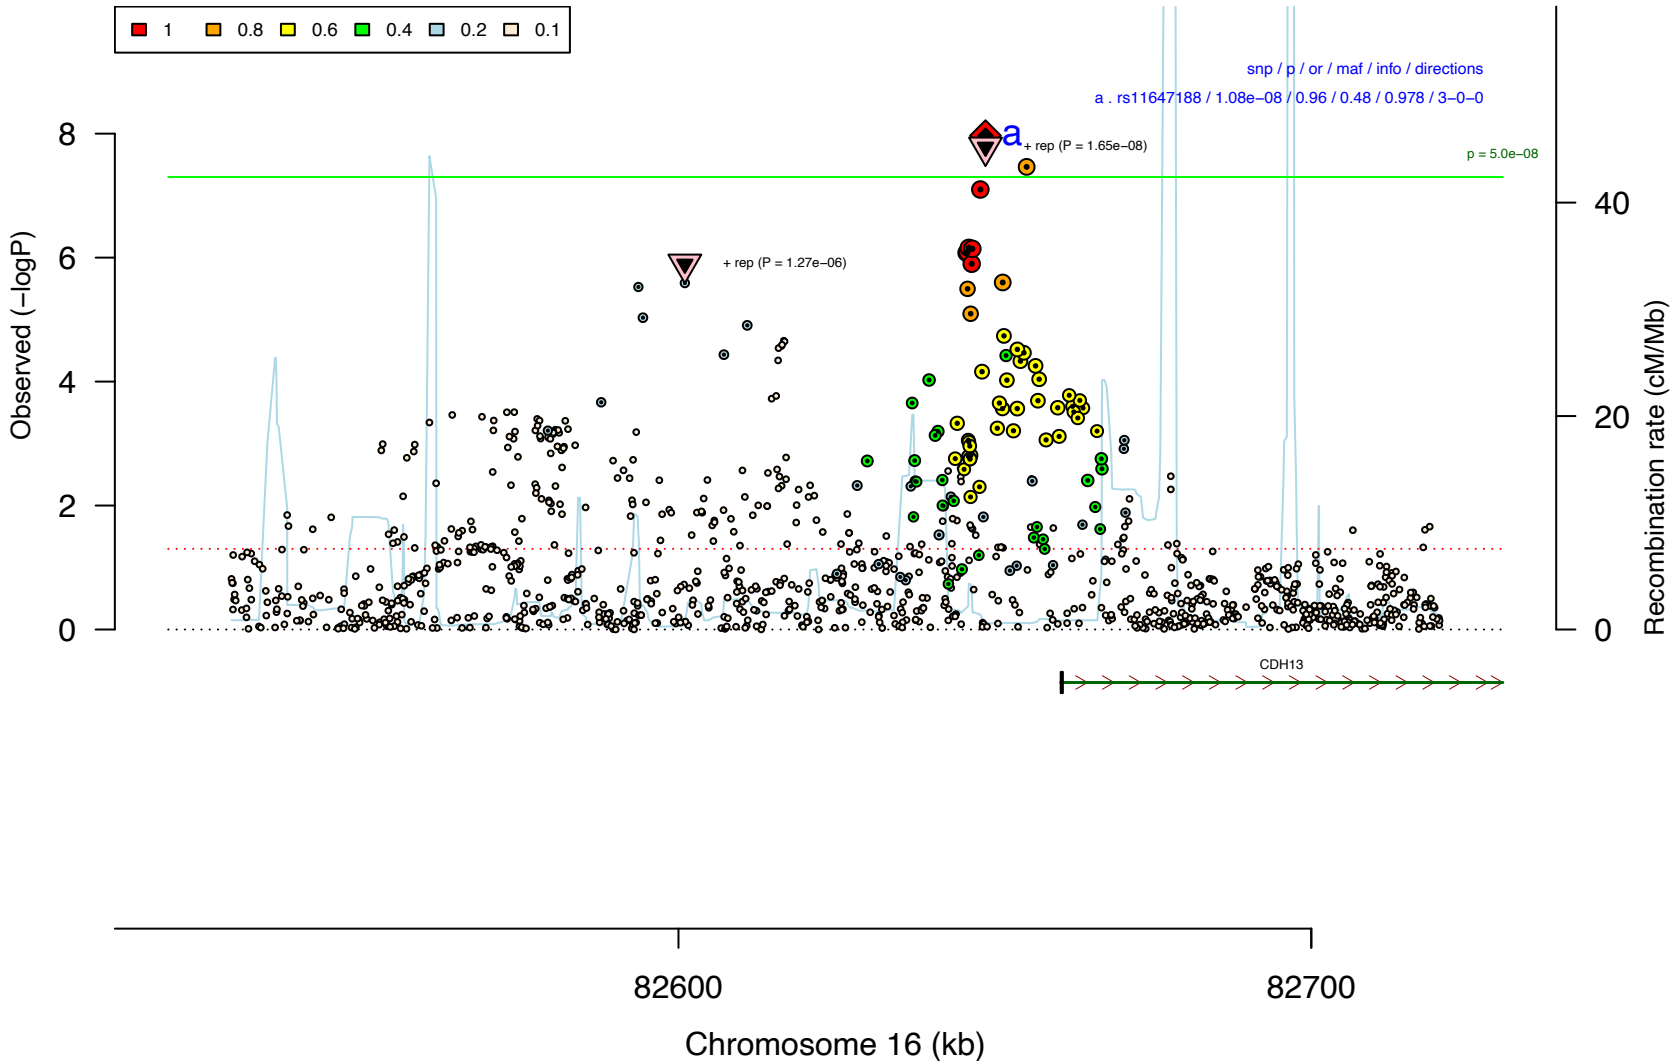

# PGC\_SCZ\_w3\_90\_0418b.226.chr1

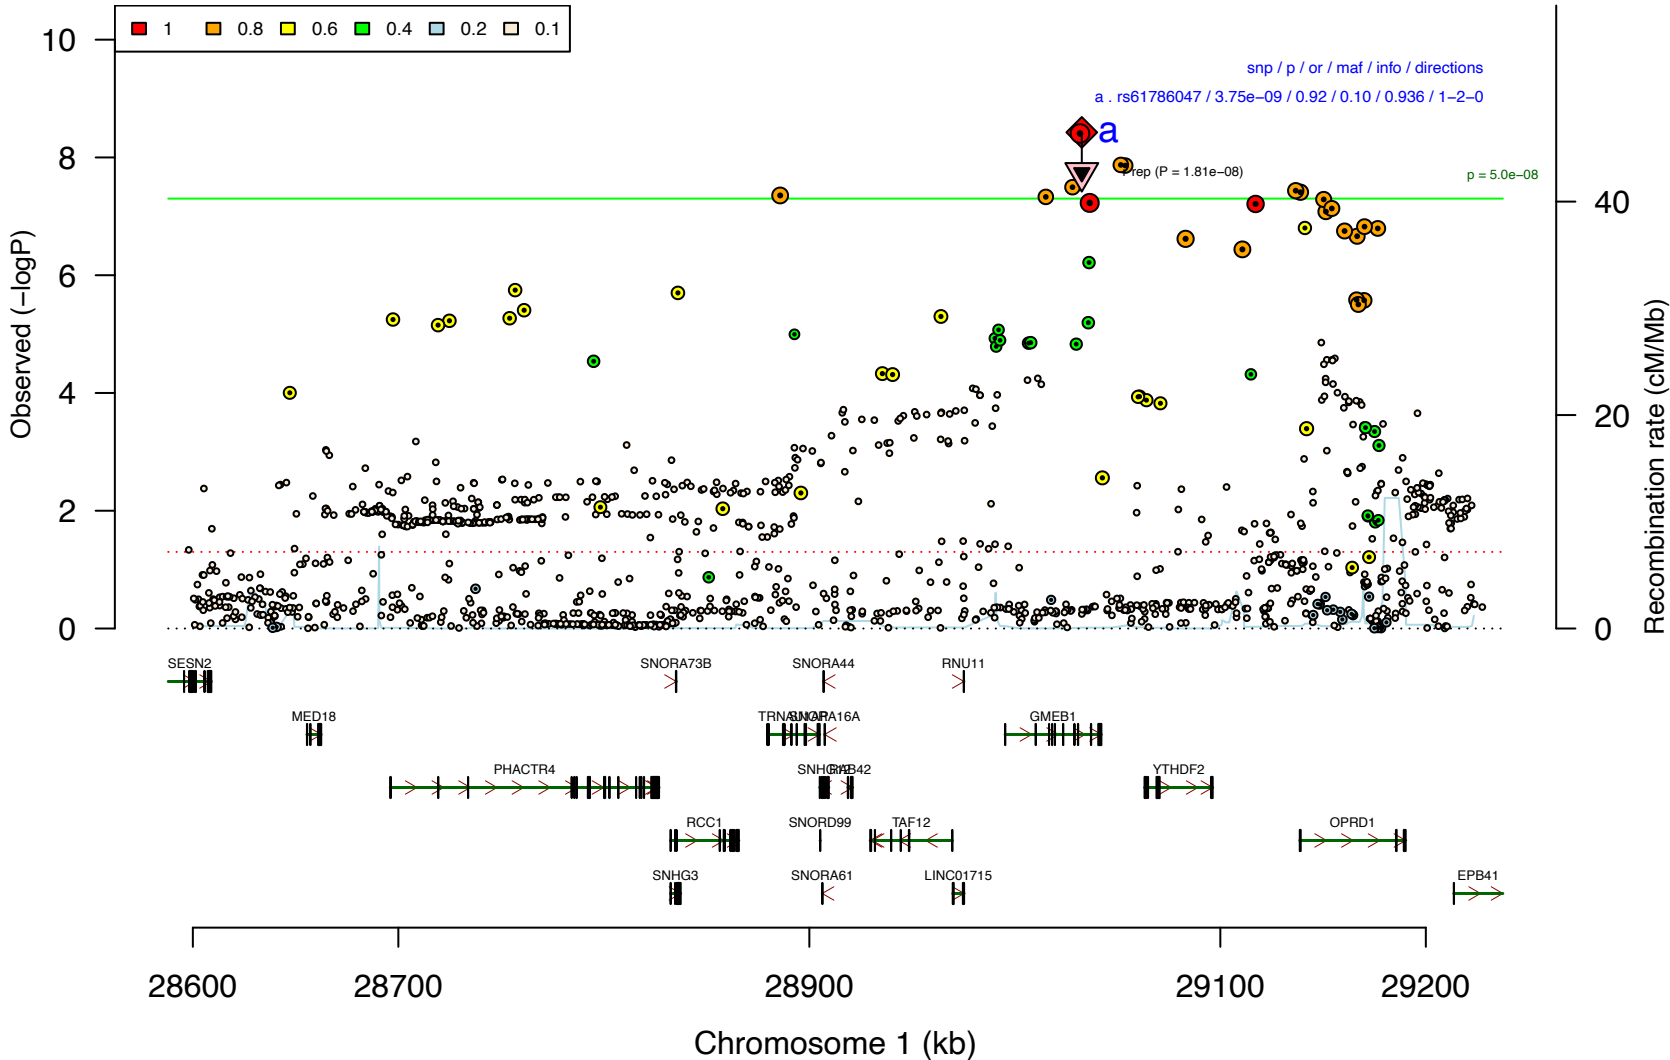

# PGC\_SCZ\_w3\_90\_0418b.227.chr1

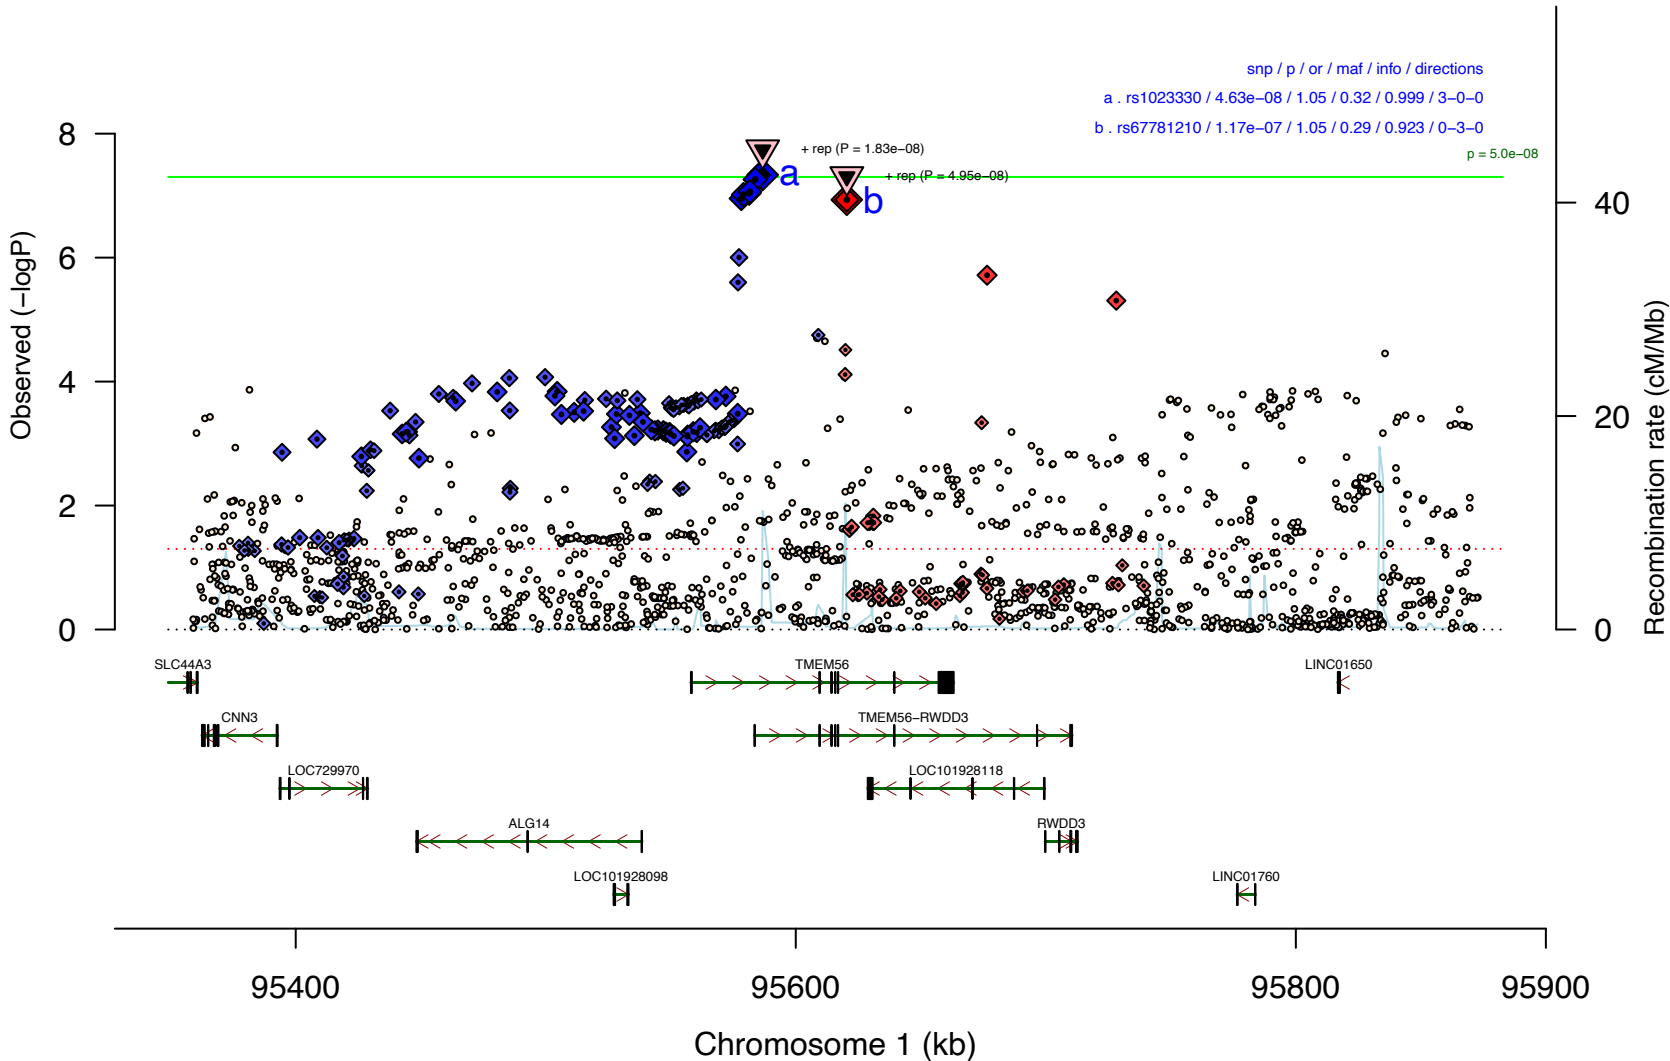

# PGC\_SCZ\_w3\_90\_0418b.228.chr18



snp / p / or / maf / info / directions

a . rs8096175 / 2.48e-07 / 1.05 / 0.17 / 0.979 / 3-0-0

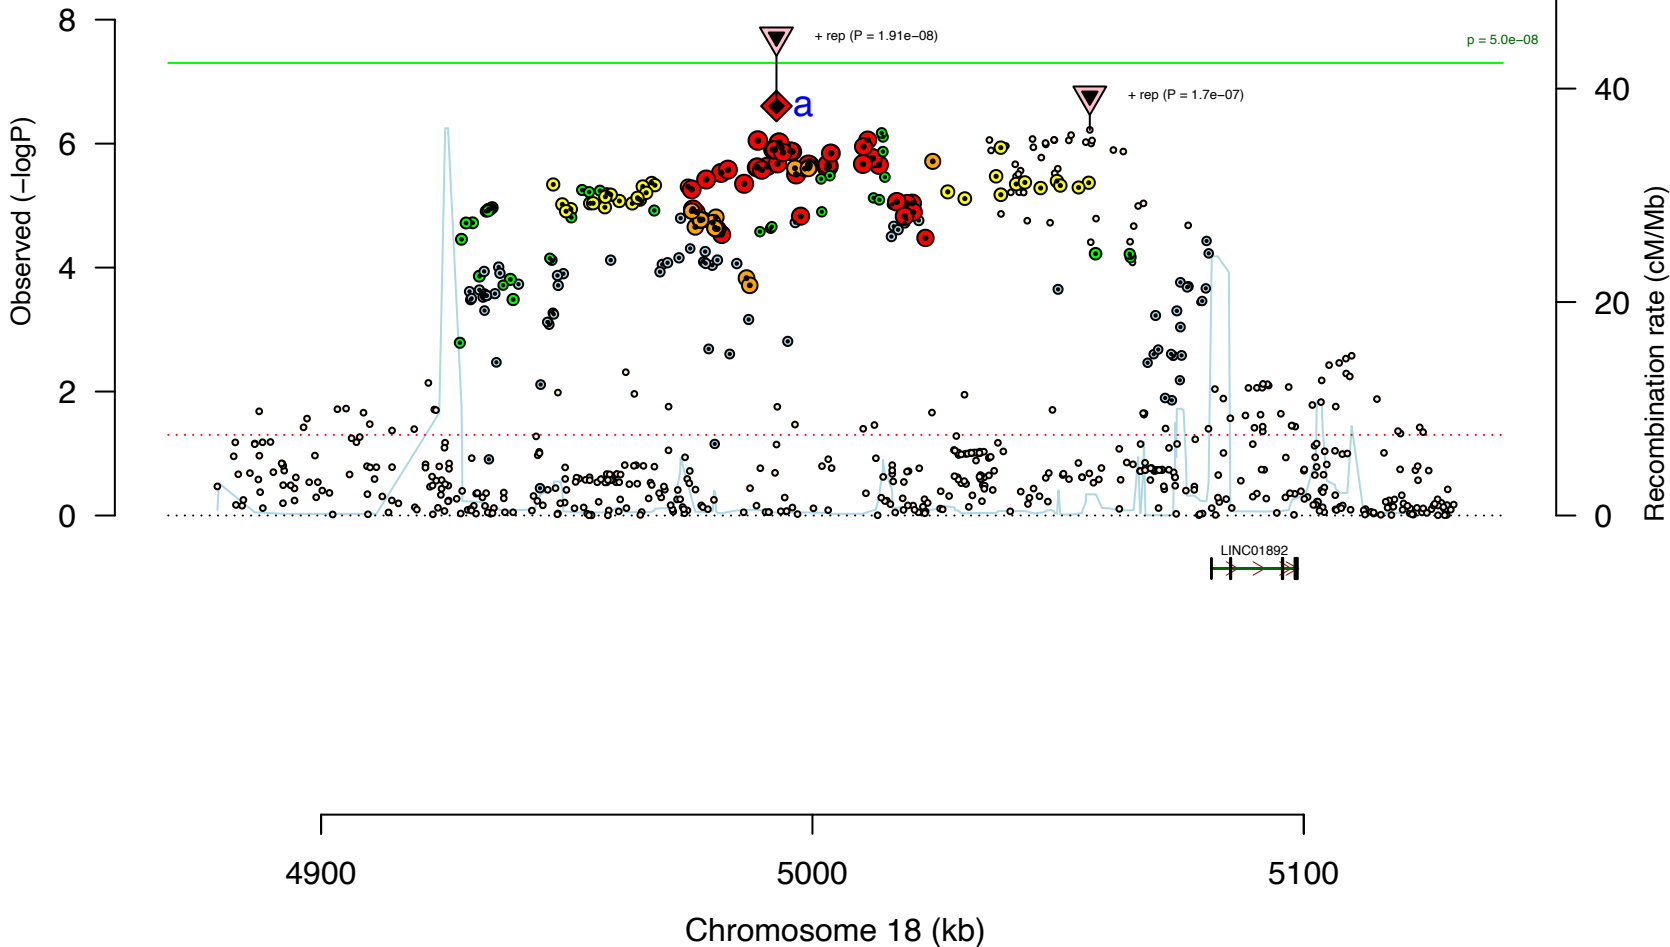

# PGC\_SCZ\_w3\_90\_0418b.229.chr9

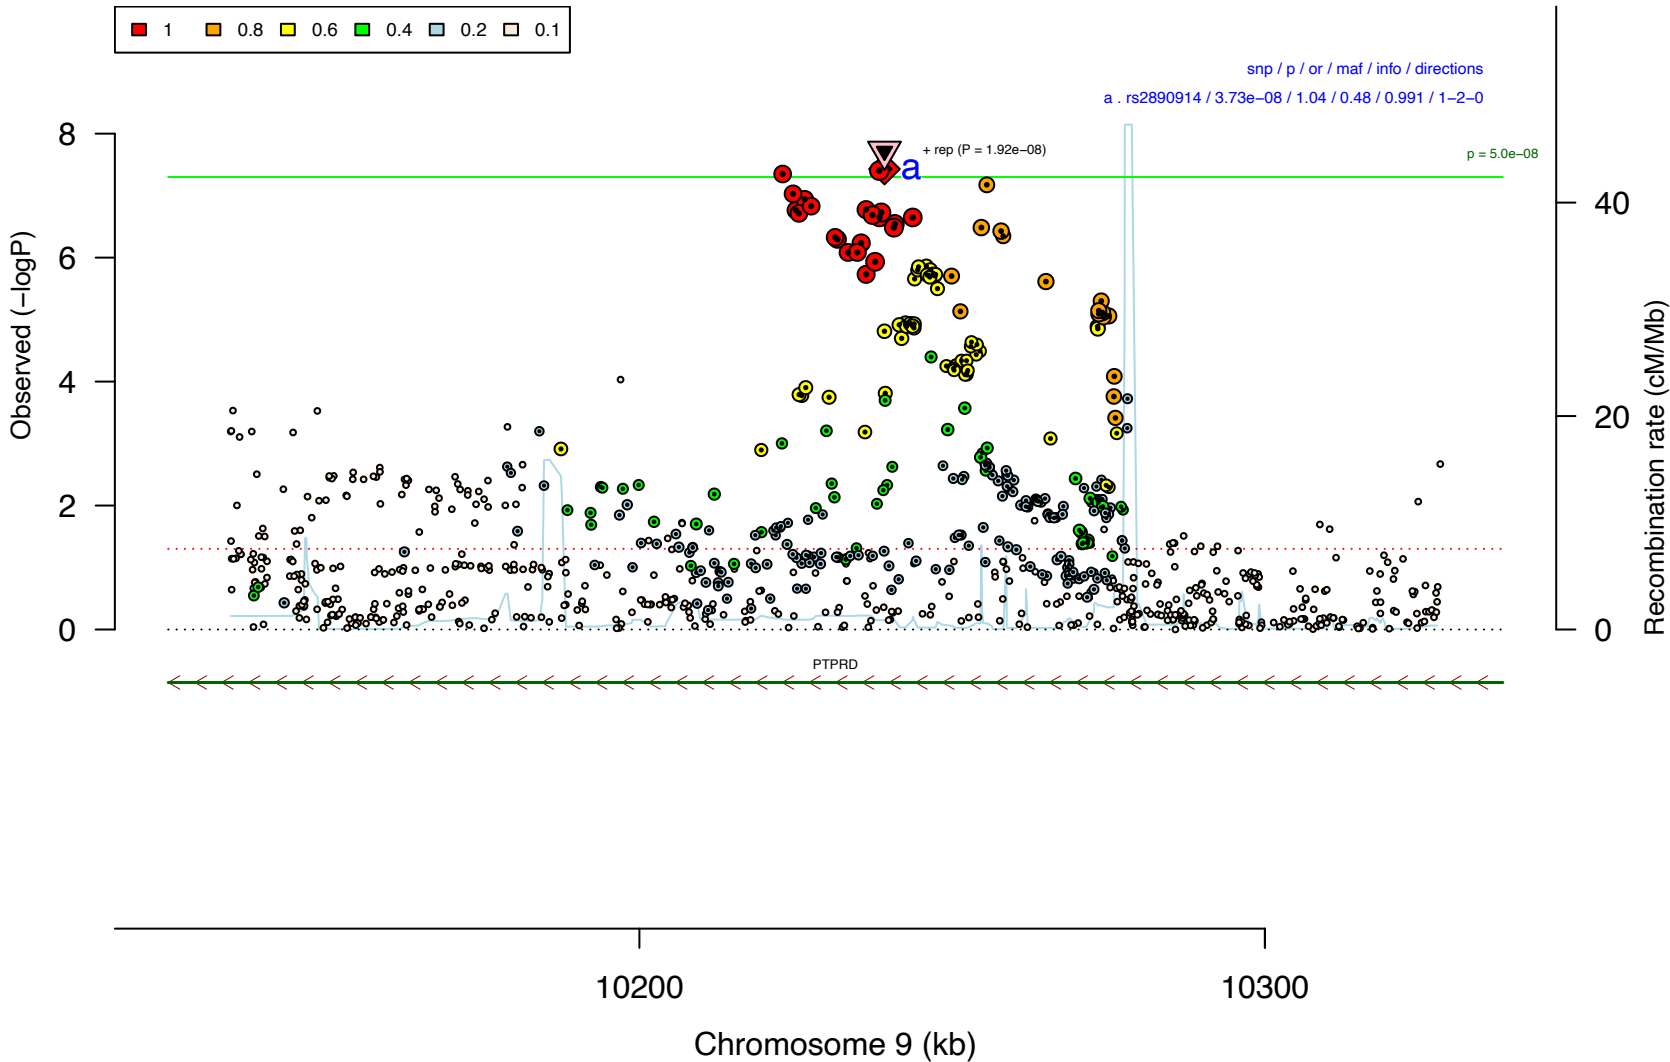



# PGC\_SCZ\_w3\_90\_0418b.230.chr13



snp / p / or / maf / info / directions  
a . rs12877581 / 2.44e-08 / 1.05 / 0.22 / 0.895 / 3-0-0

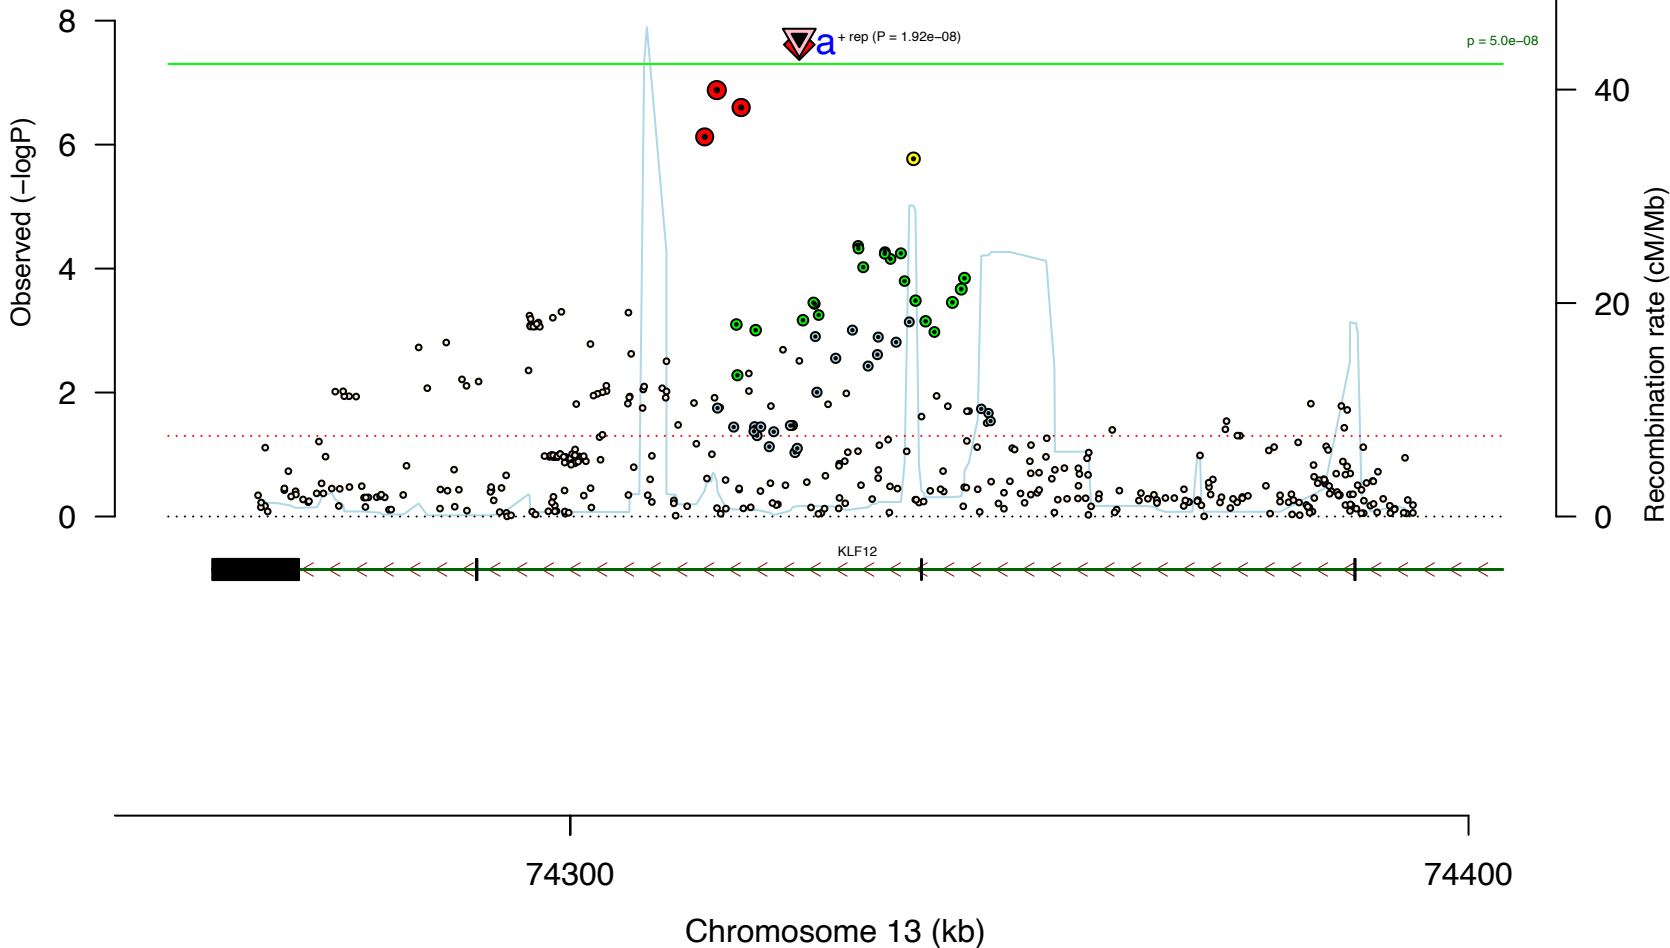

# PGC\_SCZ\_w3\_90\_0418b.231.chr9



snp / p / or / maf / info / directions  
 a . rs10781248 / 5.43e-08 / 1.04 / 0.46 / 0.953 / 2-1-0

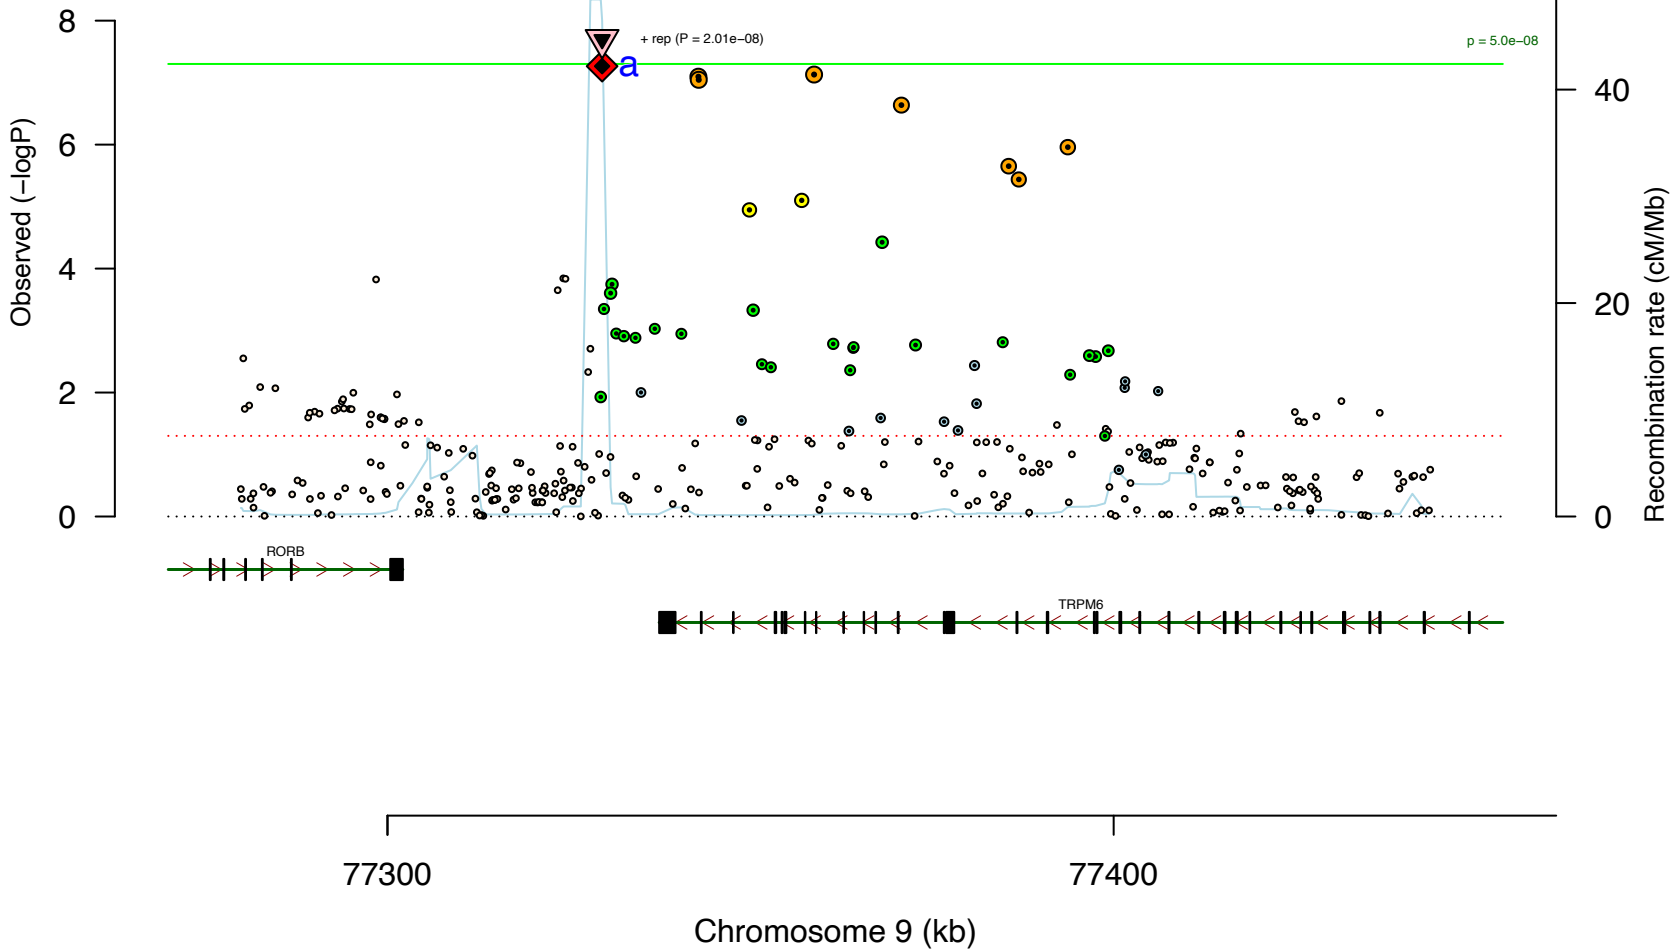

# PGC\_SCZ\_w3\_90\_0418b.232.chr3

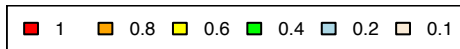

snp / p / or / maf / info / directions

a . rs62291002 / 6.74e-08 / 0.94 / 0.15 / 0.864 / 3-0-0

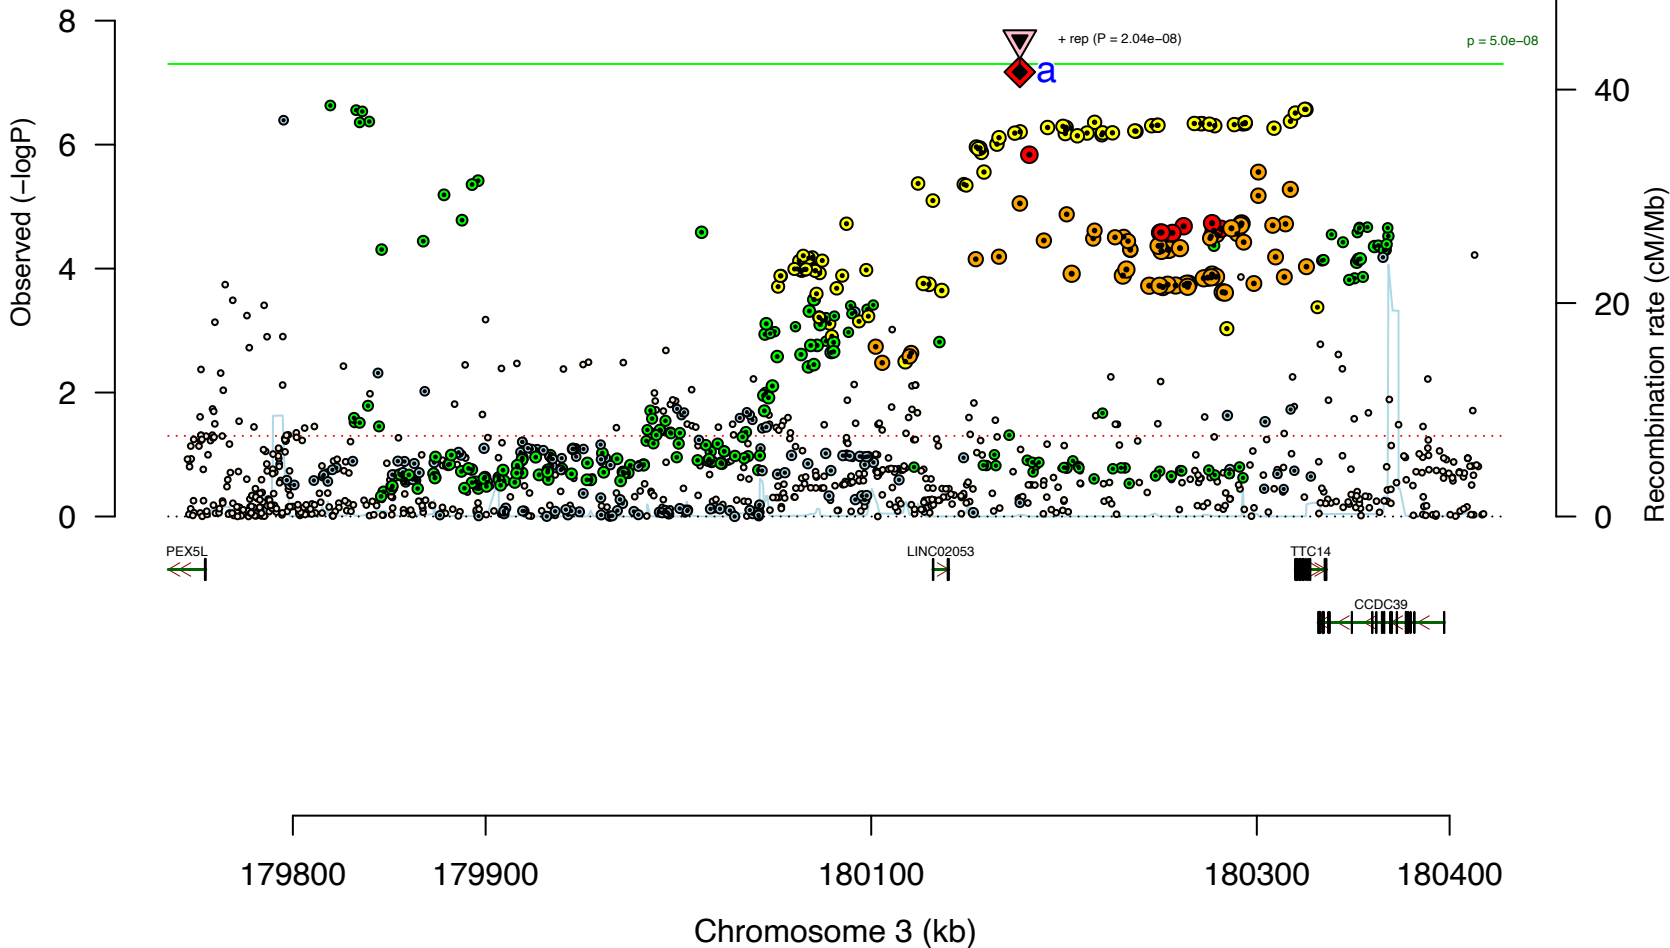

# PGC\_SCZ\_w3\_90\_0418b.233.chr14

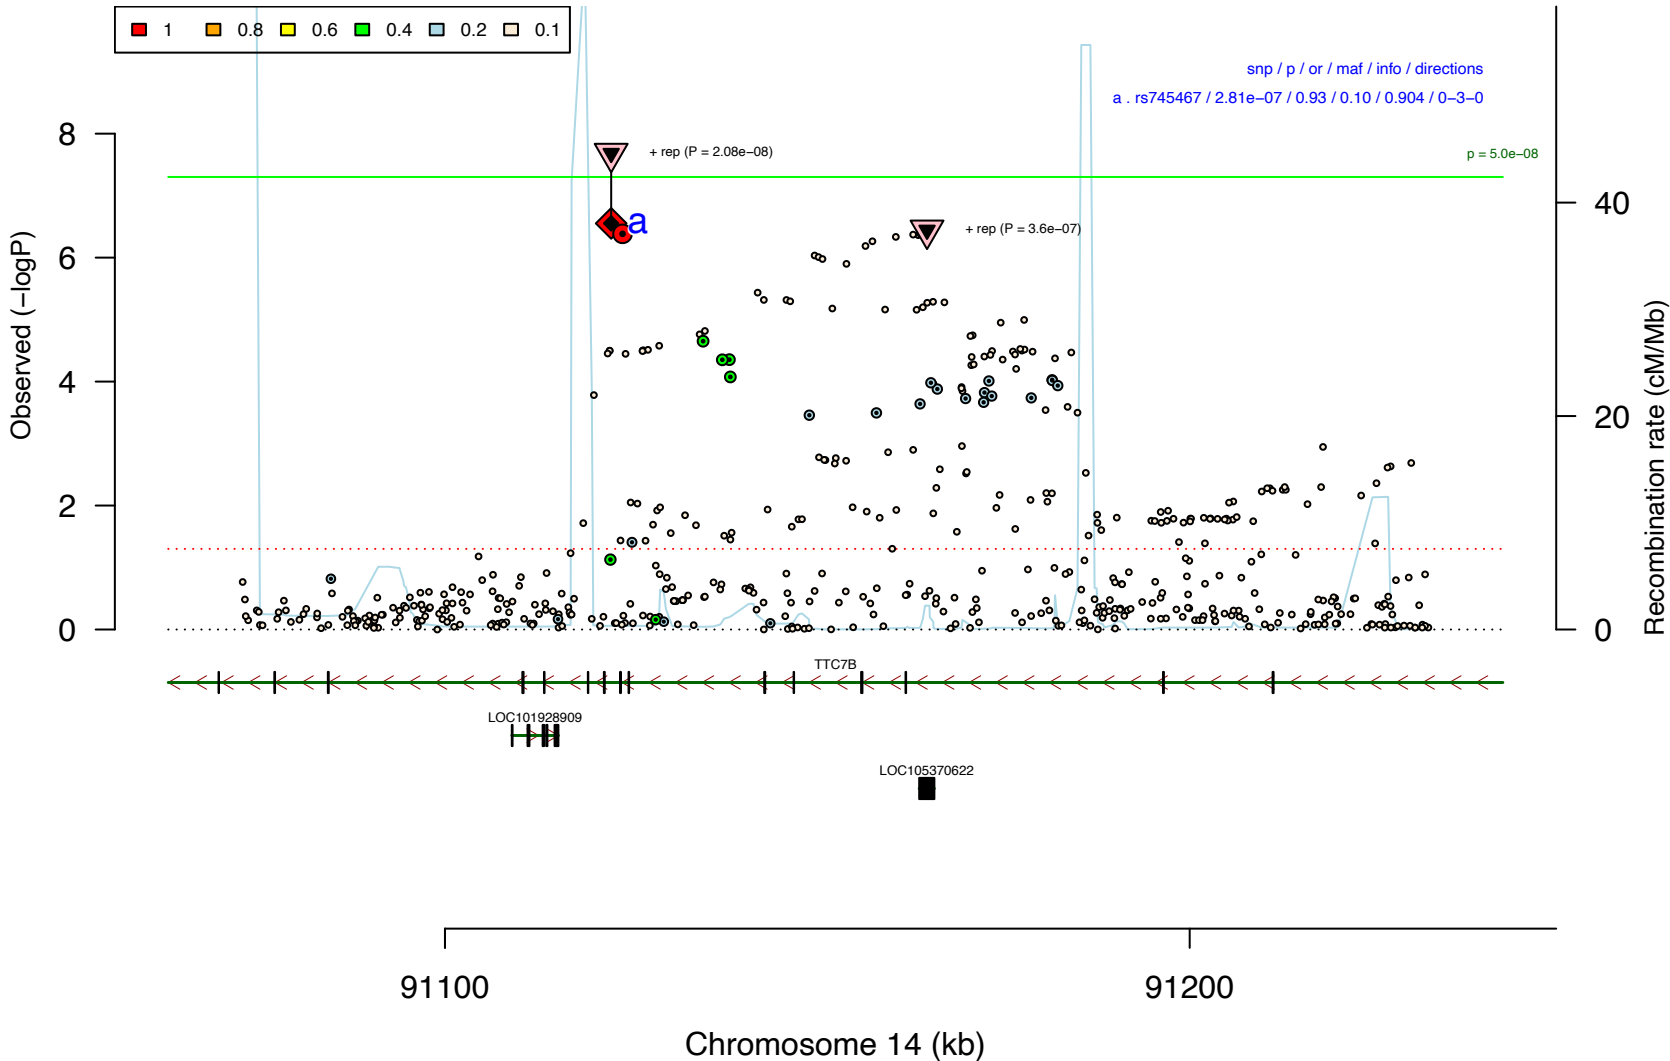

# PGC\_SCZ\_w3\_90\_0418b.234.chr11



snp / p / or / maf / info / directions

a . rs12282735 / 6.60e-08 / 0.96 / 0.40 / 0.984 / 0-3-0

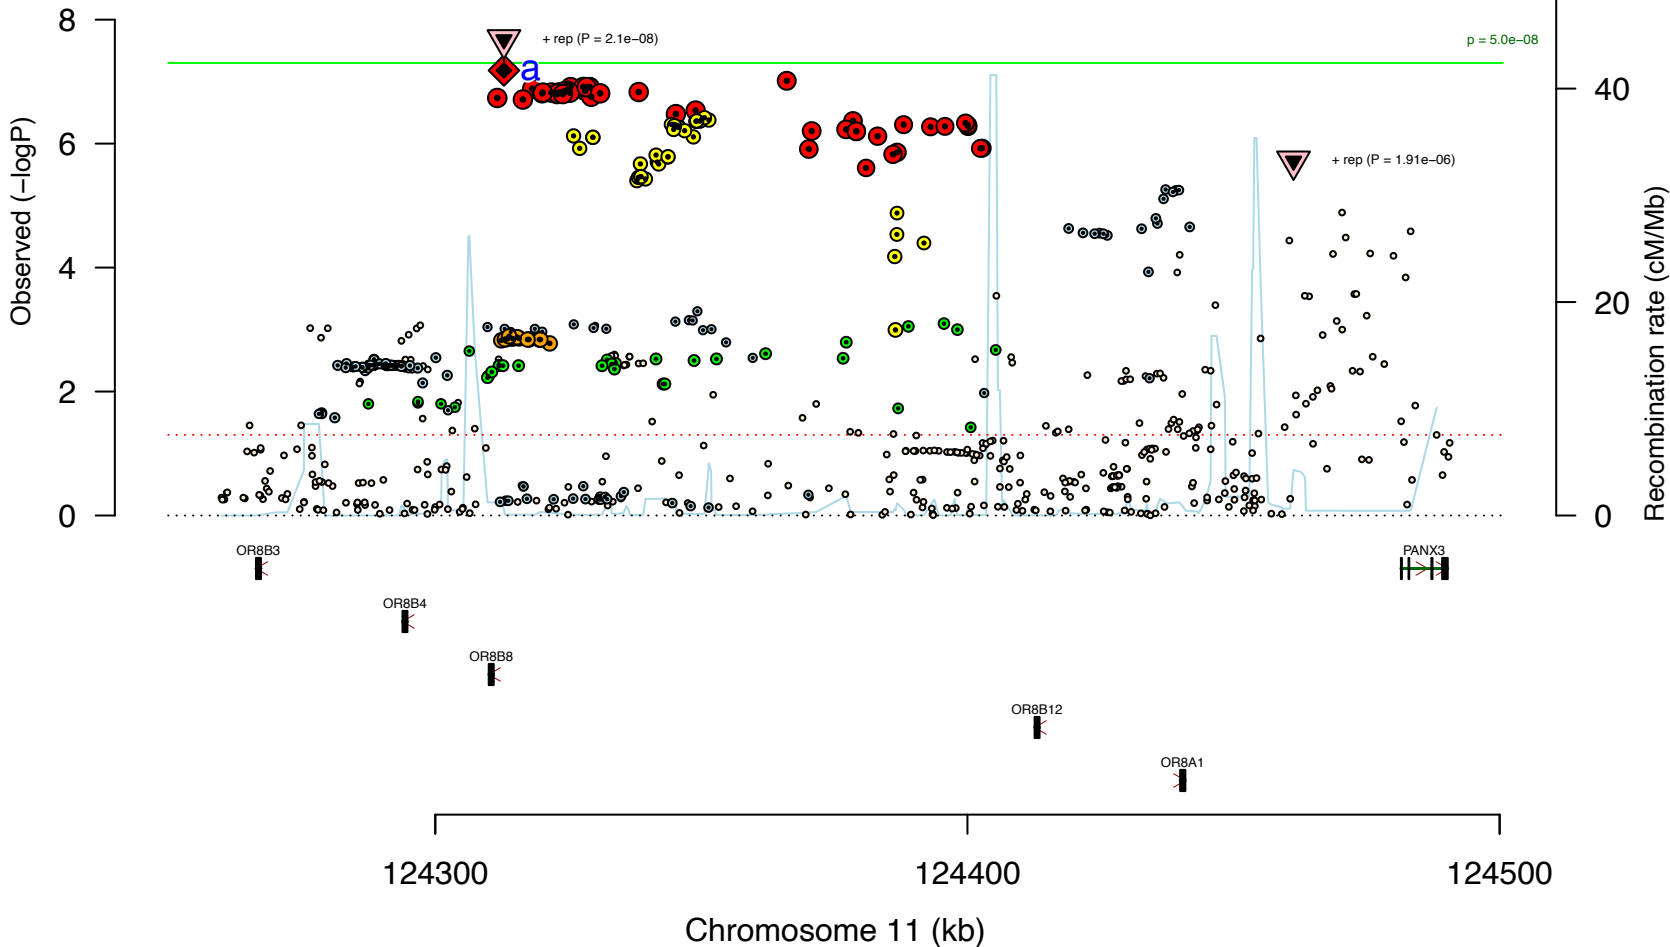

# PGC\_SCZ\_w3\_90\_0418b.235.chr4



snp / p / or / maf / info / directions  
a . rs59518103 / 4.51e-08 / 0.92 / 0.08 / 0.994 / 3-0-0

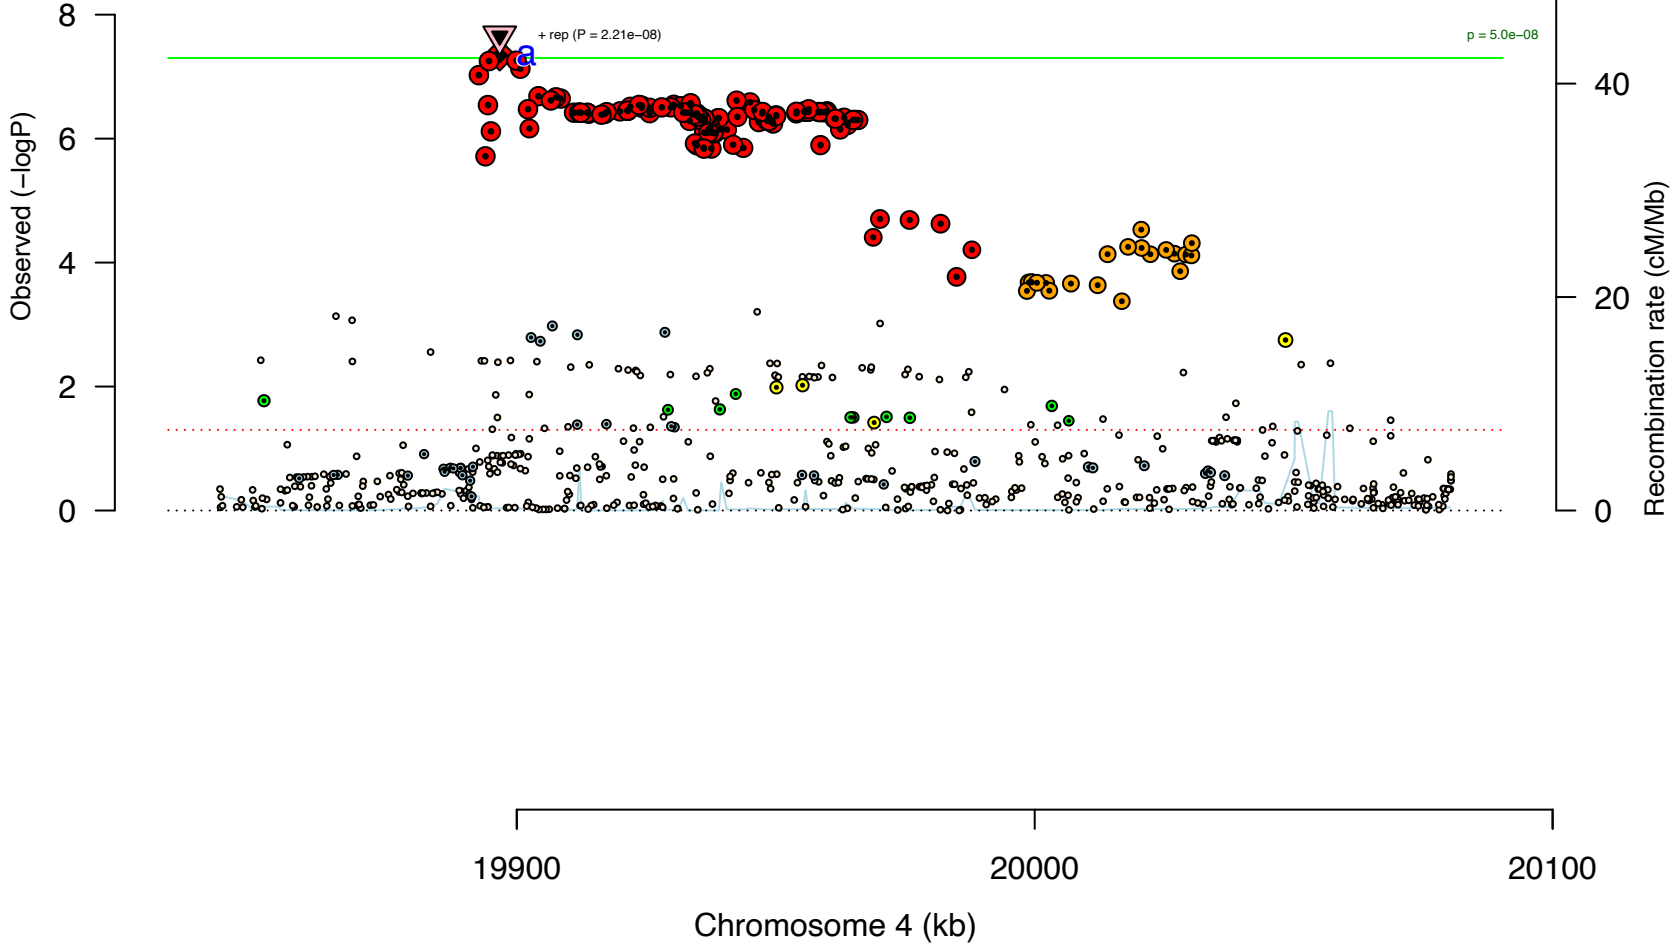

# PGC\_SCZ\_w3\_90\_0418b.236.chr7



snp / p / or / maf / info / directions  
 a . rs6946576 / 4.94e-08 / 1.05 / 0.43 / 0.827 / 0-3-0

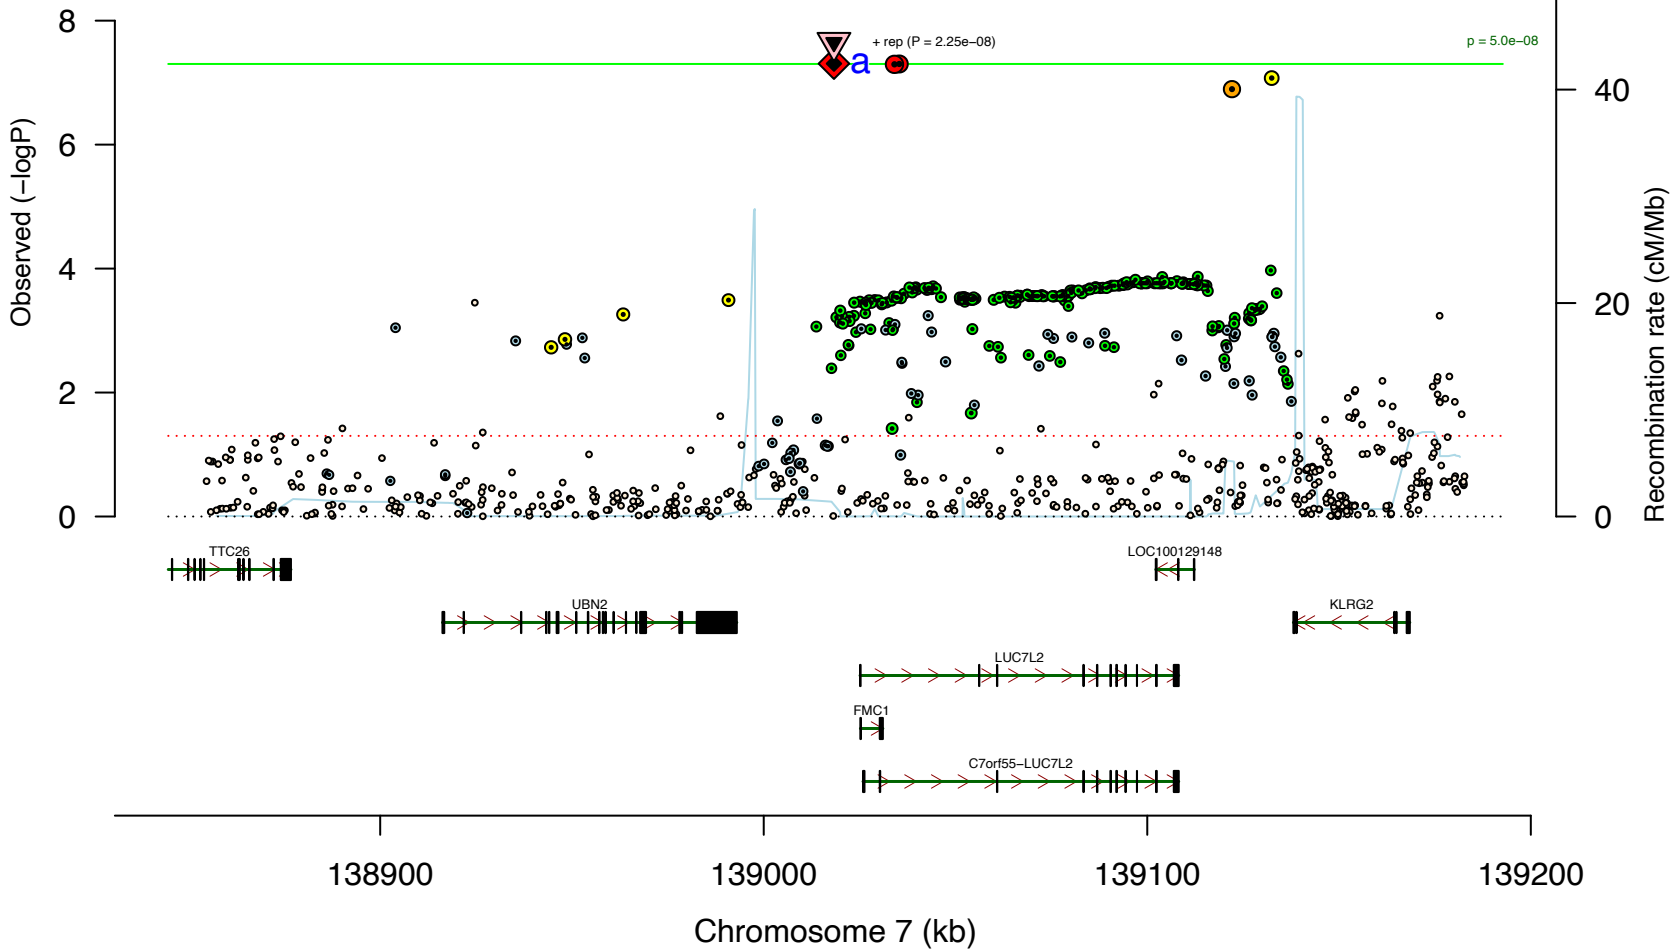

# PGC\_SCZ\_w3\_90\_0418b.237.chr10

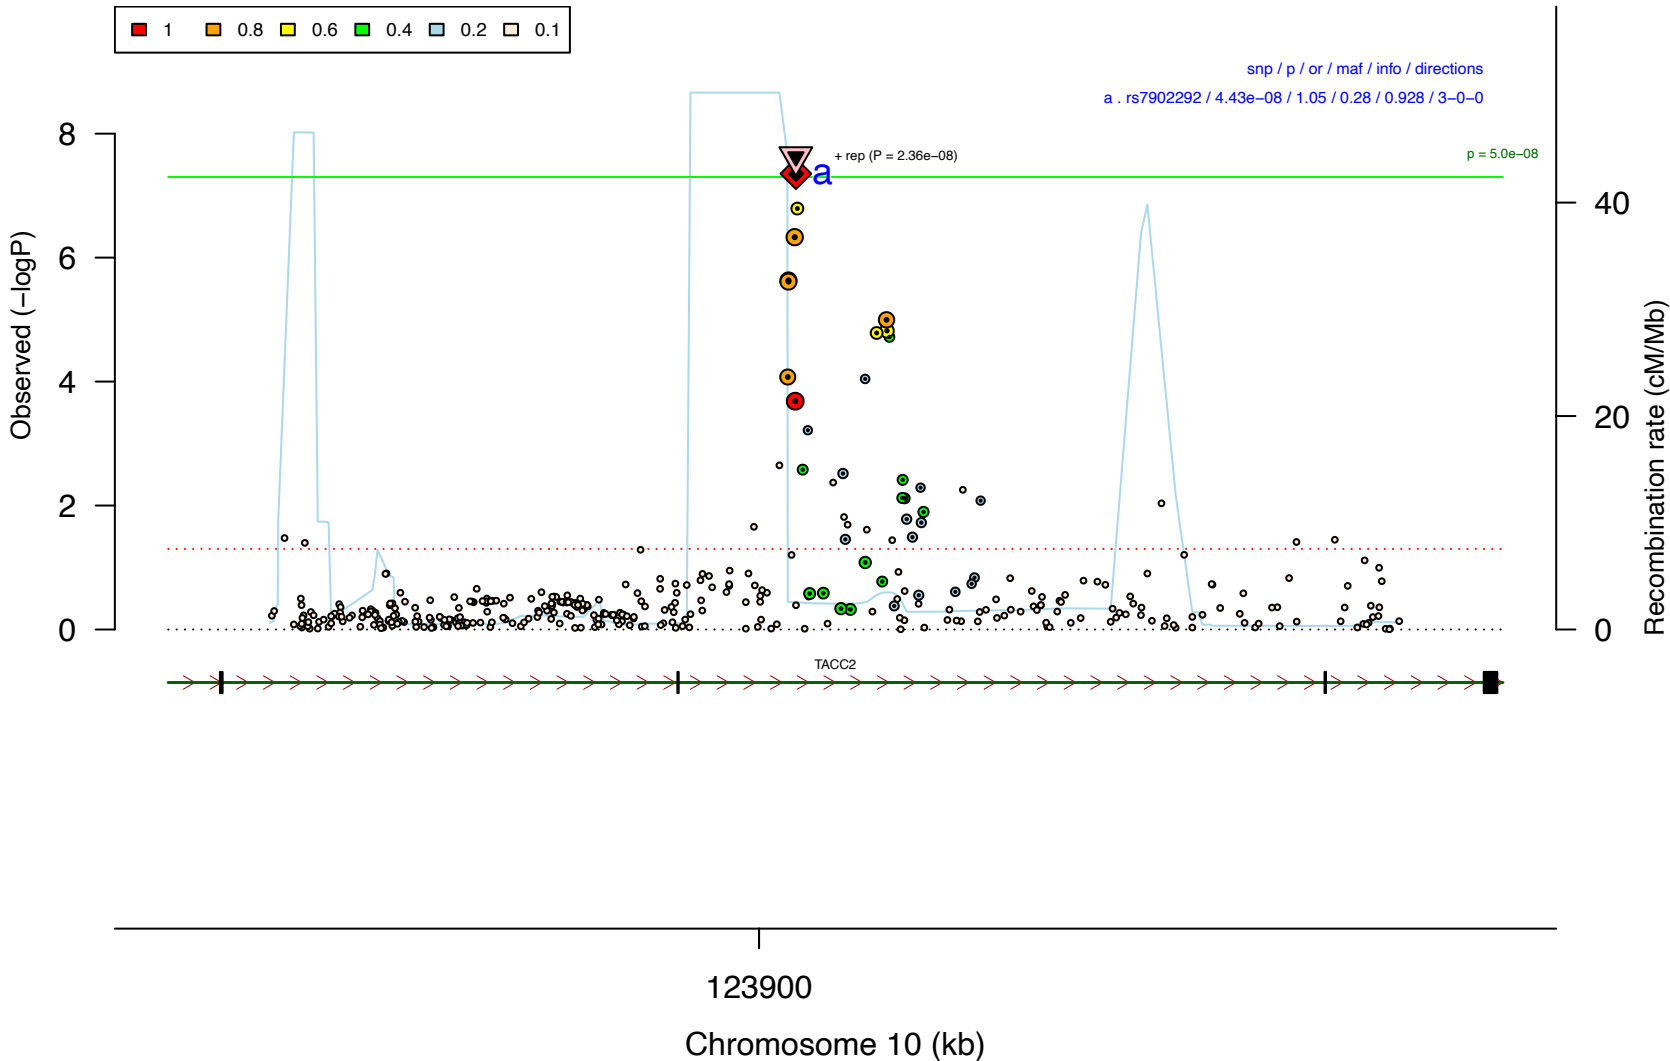



# PGC\_SCZ\_w3\_90\_0418b.238.chr16

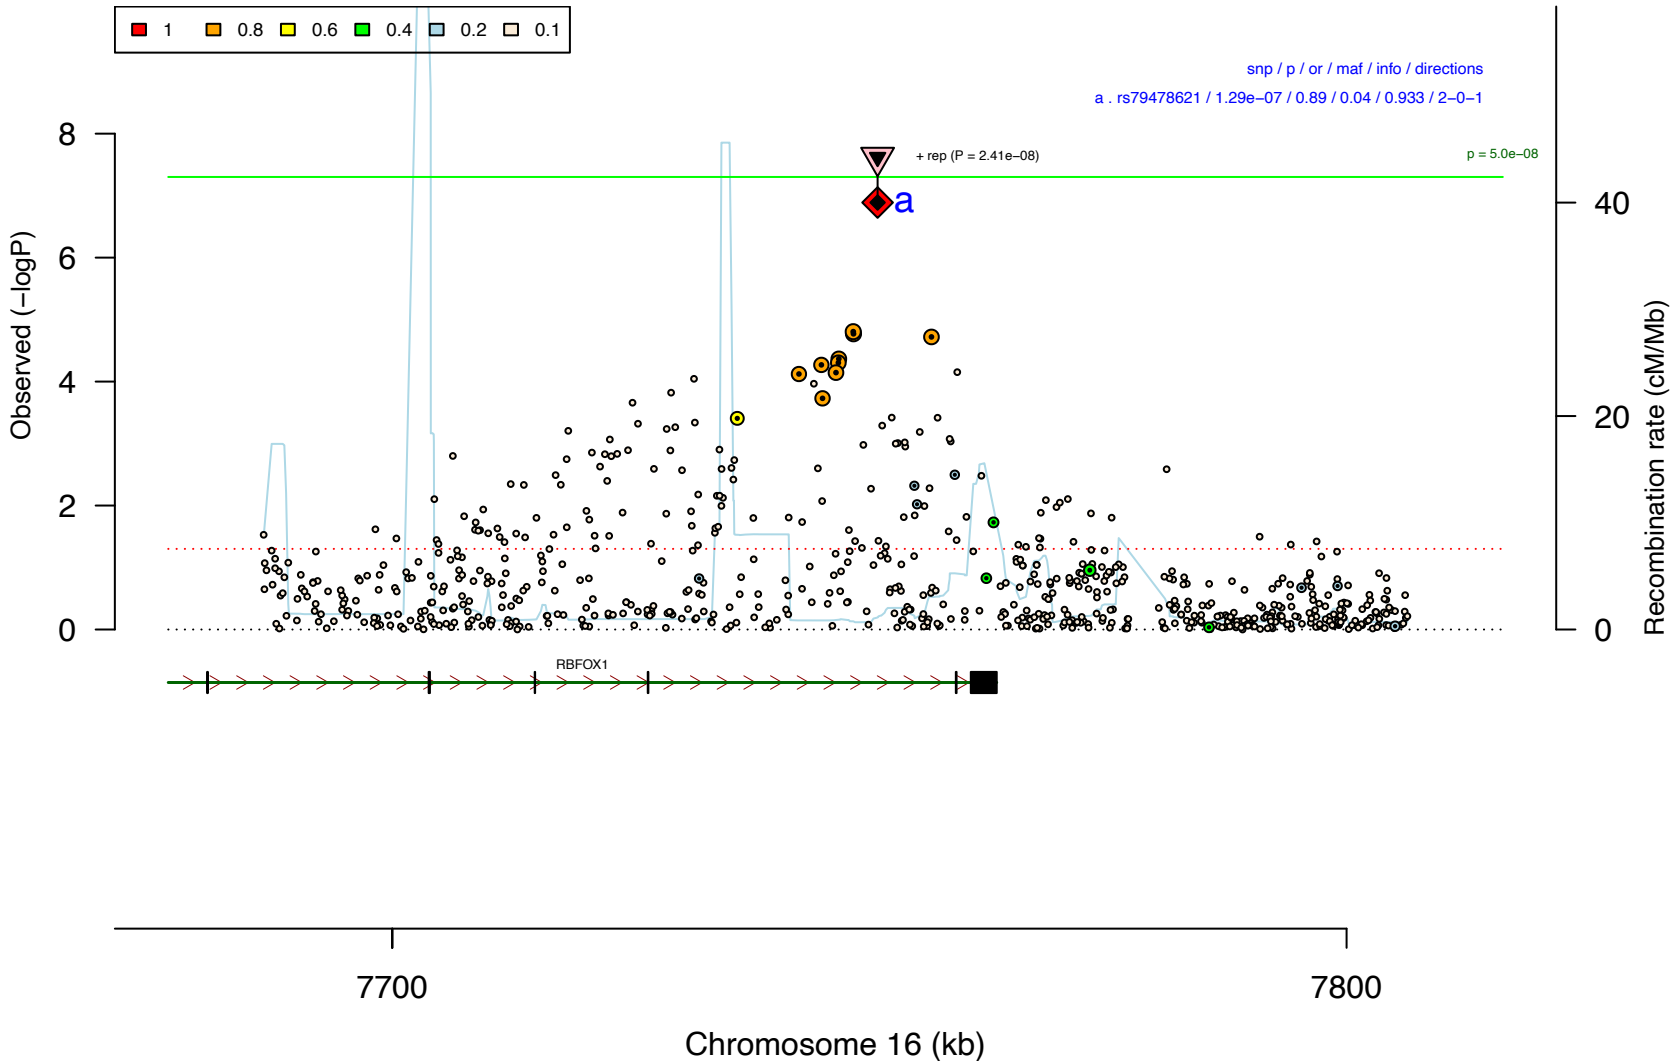

# PGC\_SCZ\_w3\_90\_0418b.239.chr6



snp / p / or / maf / info / directions  
a . rs9390172 / 6.75e-08 / 1.07 / 0.12 / 0.986 / 0-3-0

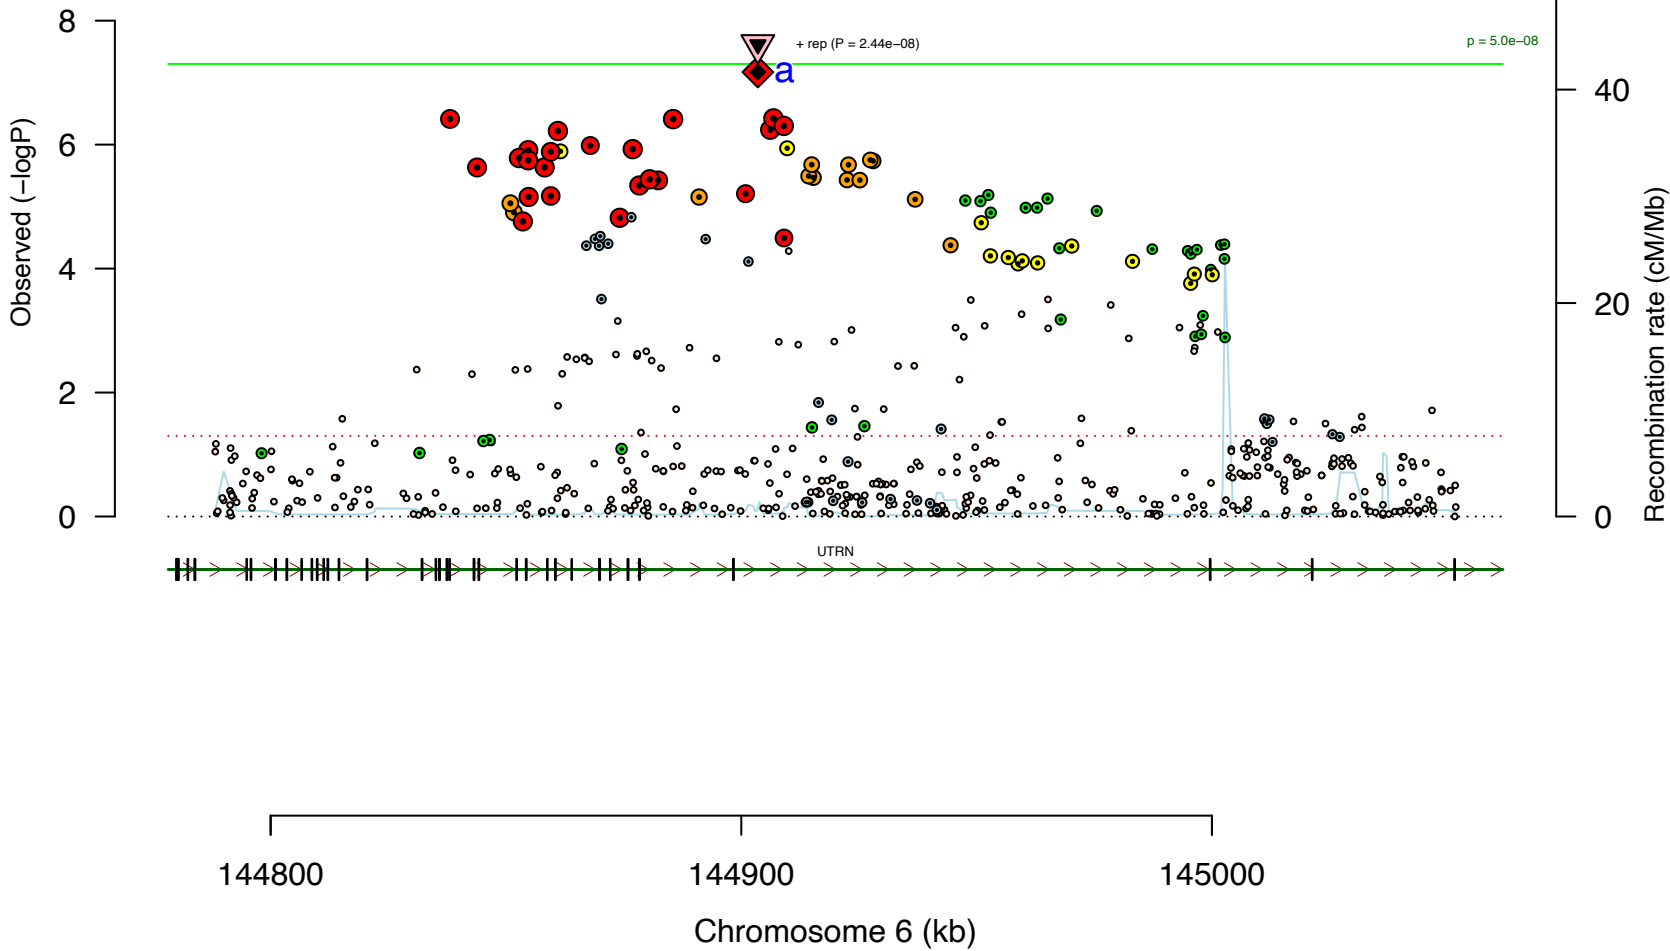

# PGC\_SCZ\_w3\_90\_0418b.240.chr7



snp / p / or / maf / info / directions  
a . rs2299409 / 8.56e-08 / 0.96 / 0.43 / 0.995 / 0-3-0

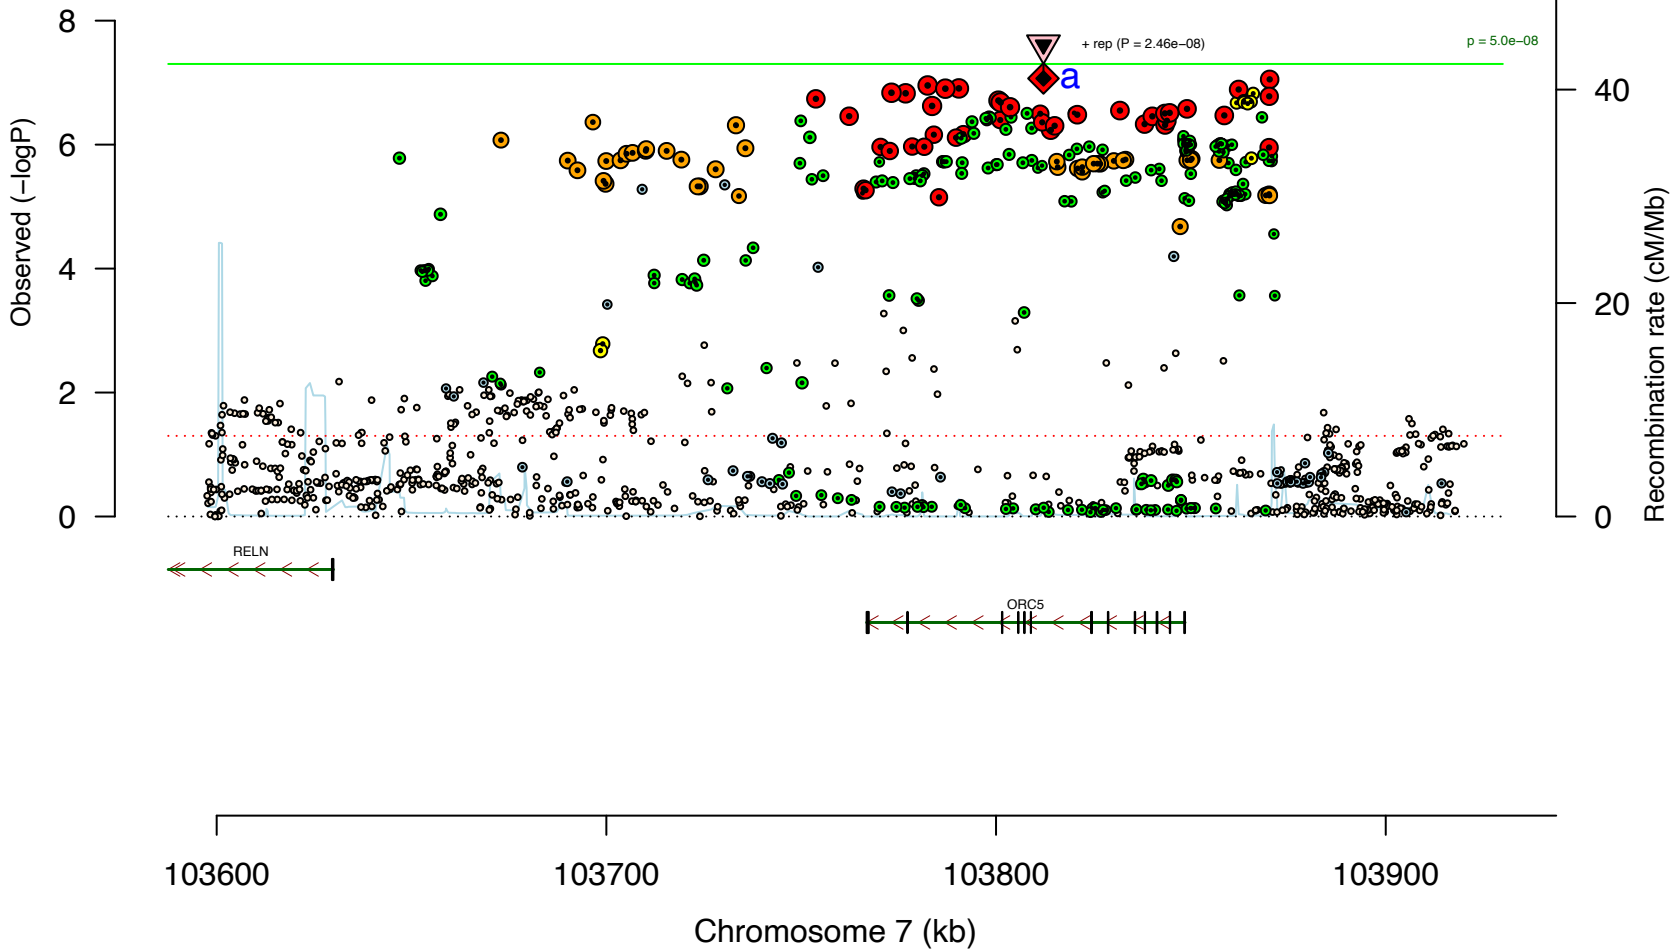

# PGC\_SCZ\_w3\_90\_0418b.241.chr12

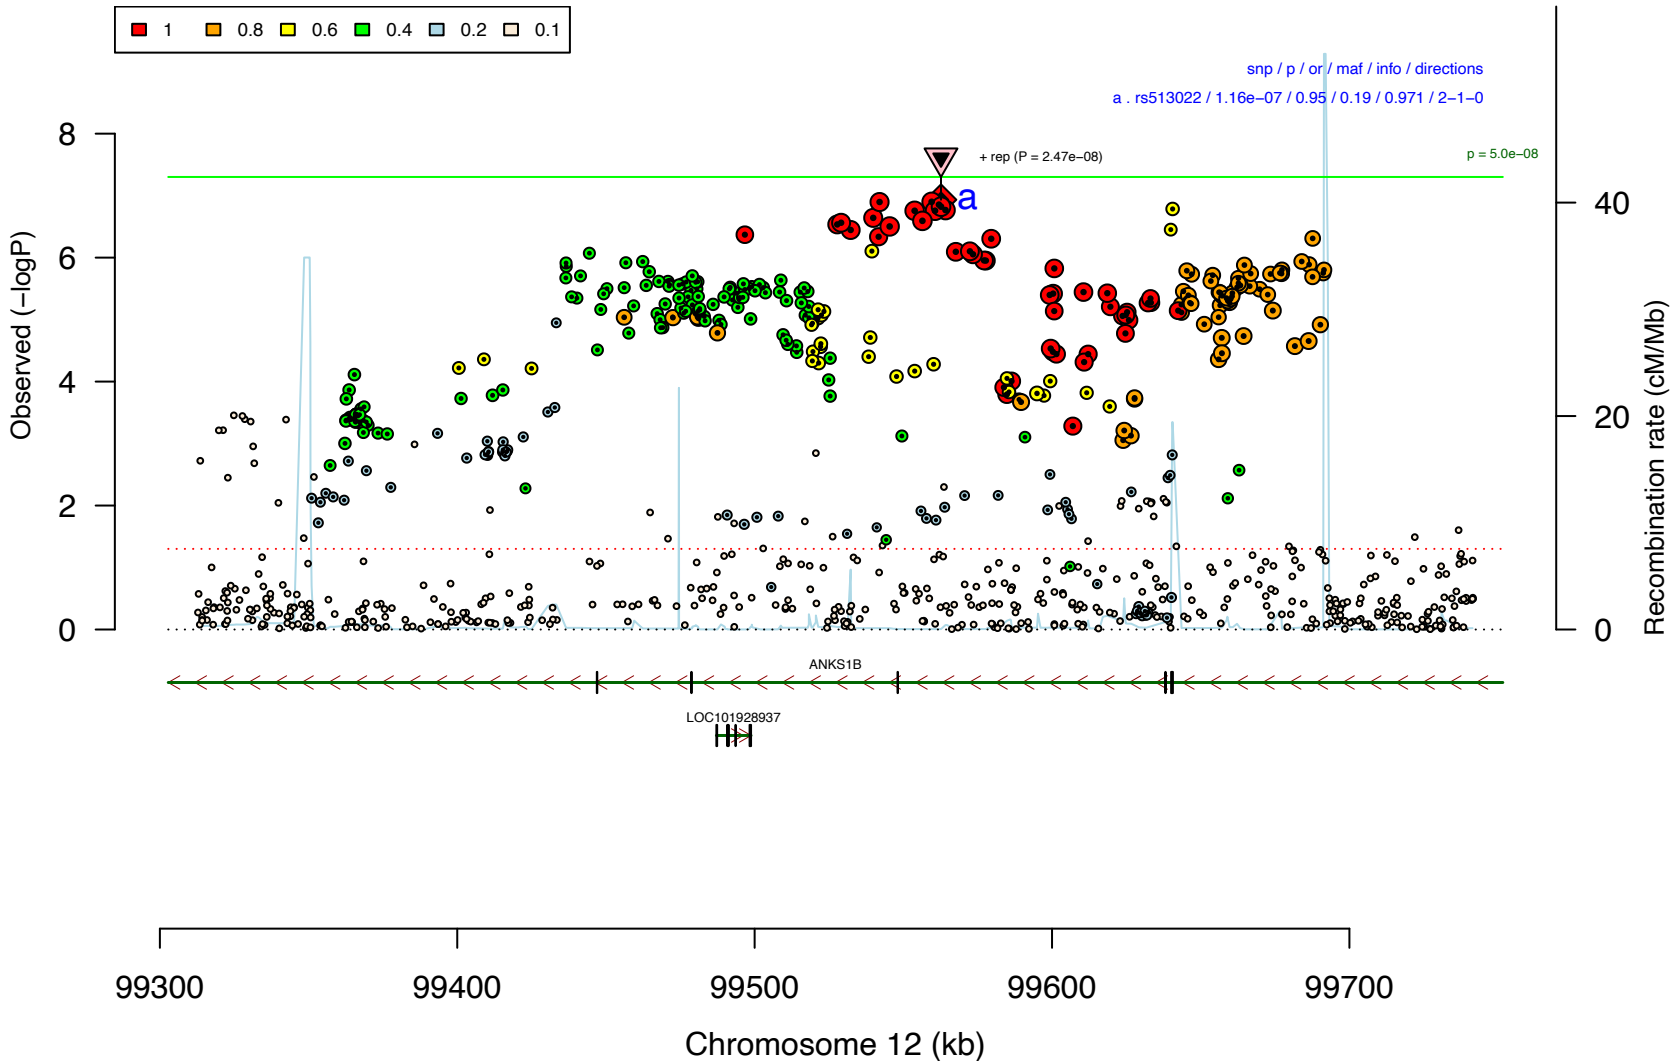

# PGC\_SCZ\_w3\_90\_0418b.242.chr12



snp / p / or / maf / info / directions

a . rs61928076 / 7.01e-08 / 1.15 / 0.03 / 0.727 / 2-0-1

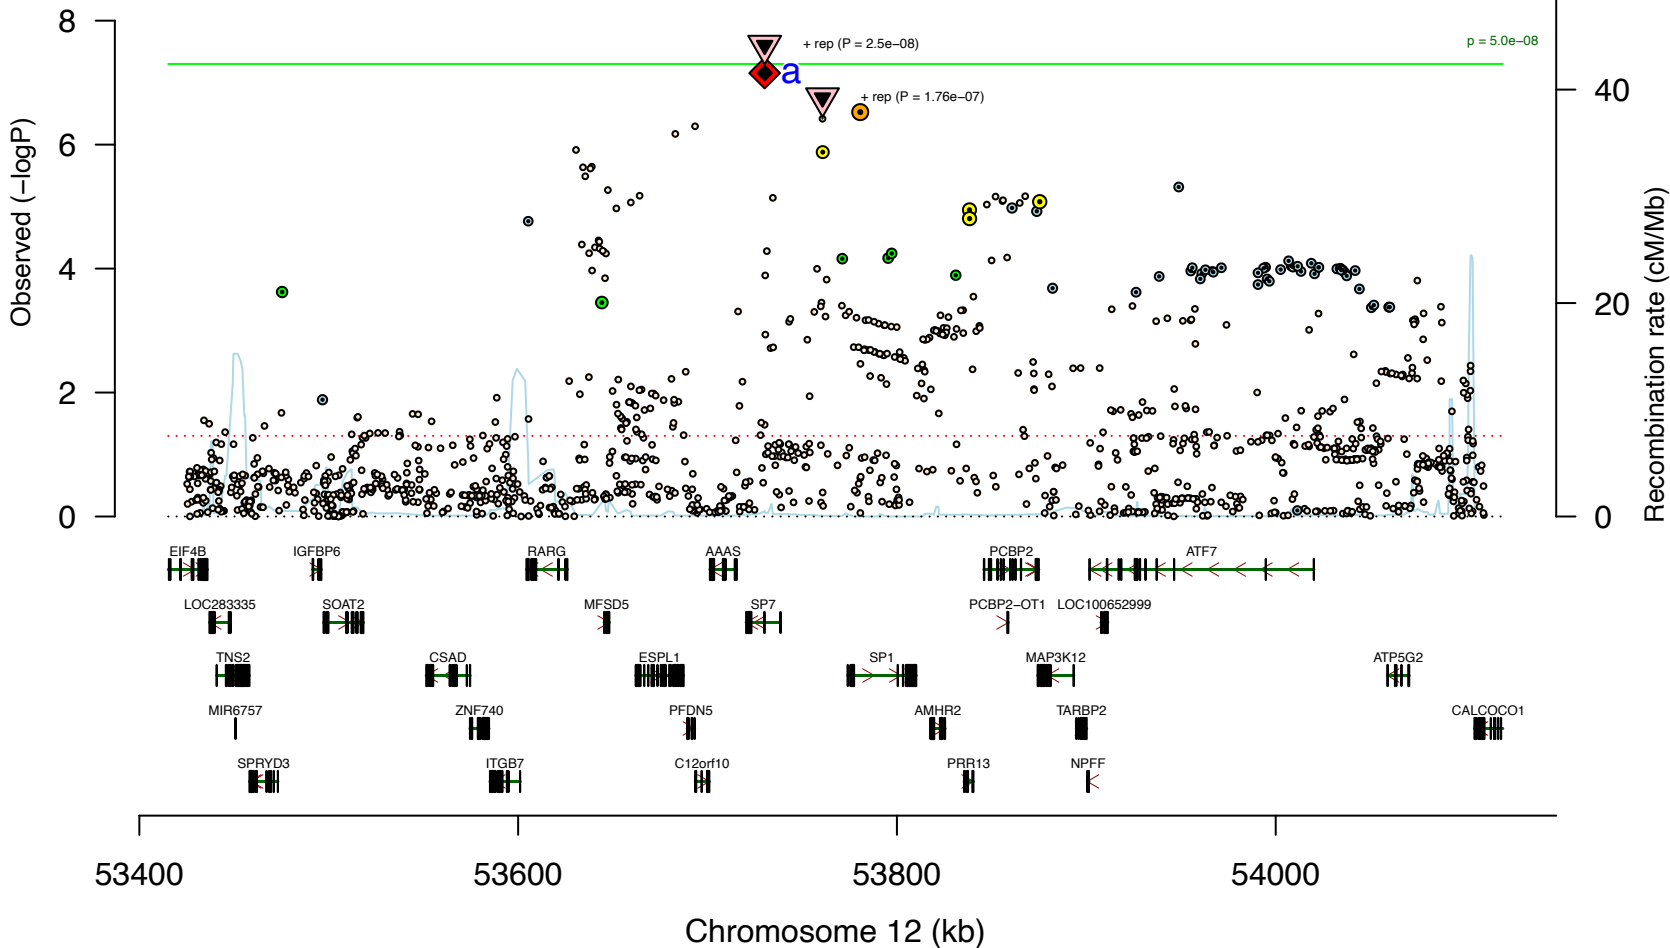

# PGC\_SCZ\_w3\_90\_0418b.243.chr18

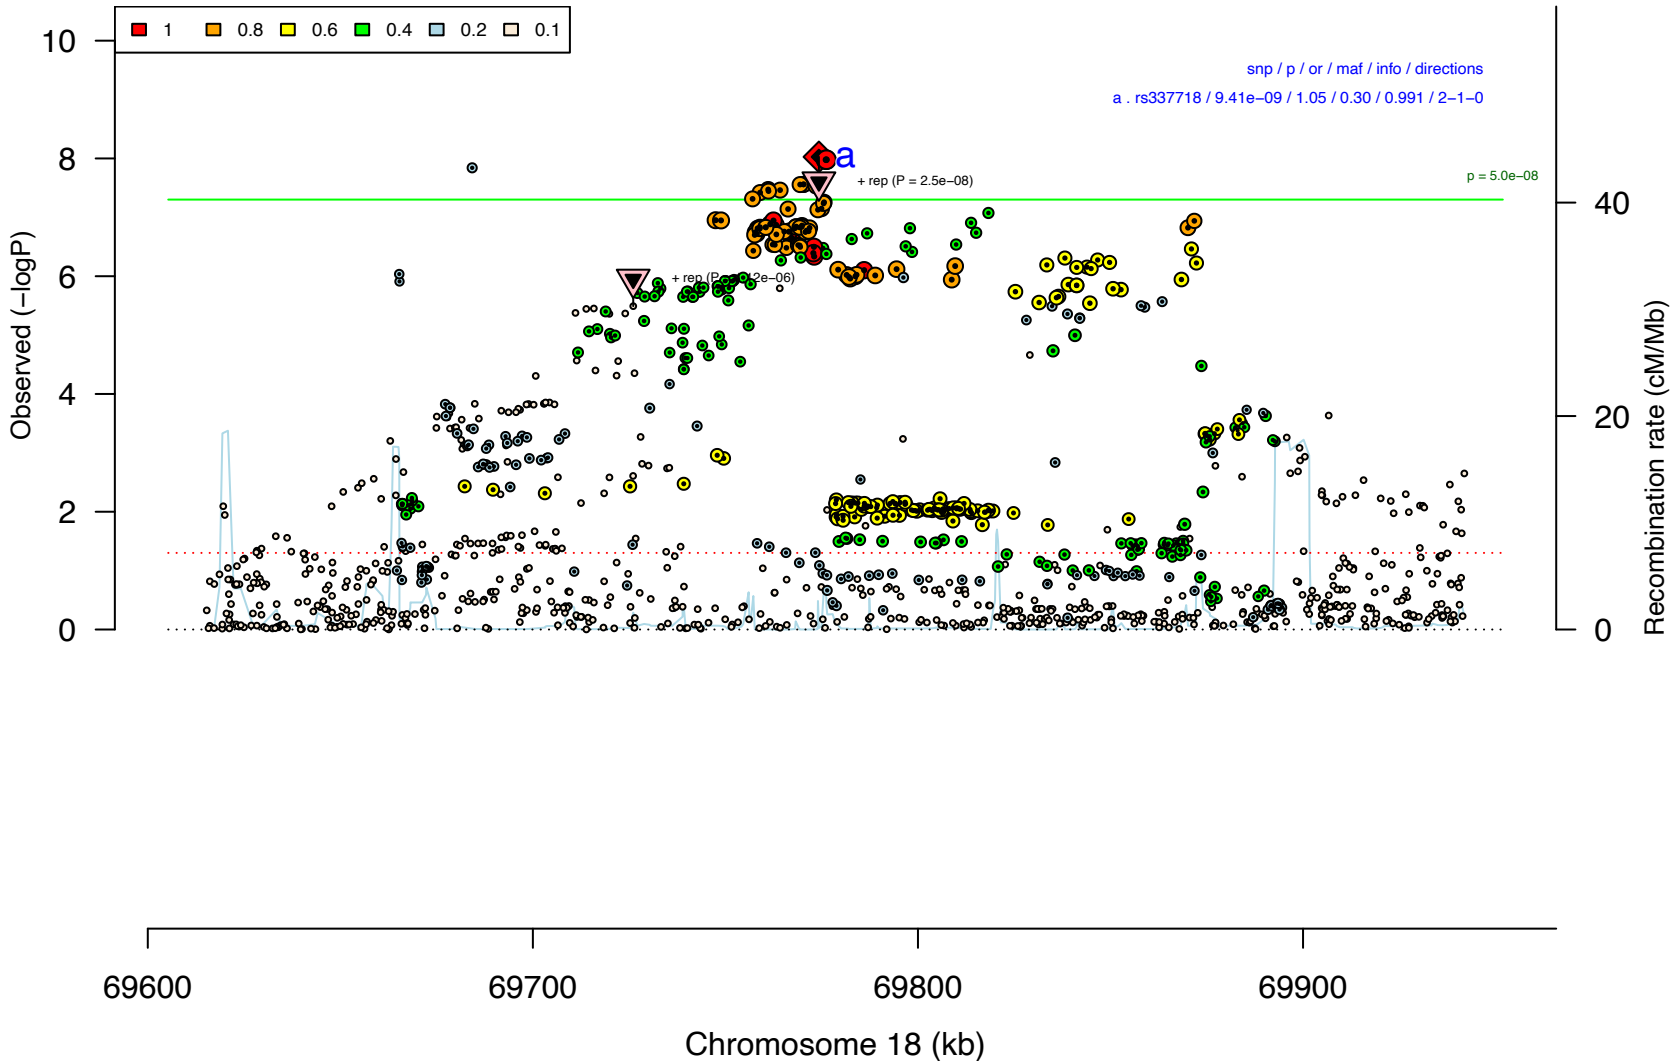

# PGC\_SCZ\_w3\_90\_0418b.244.chr6

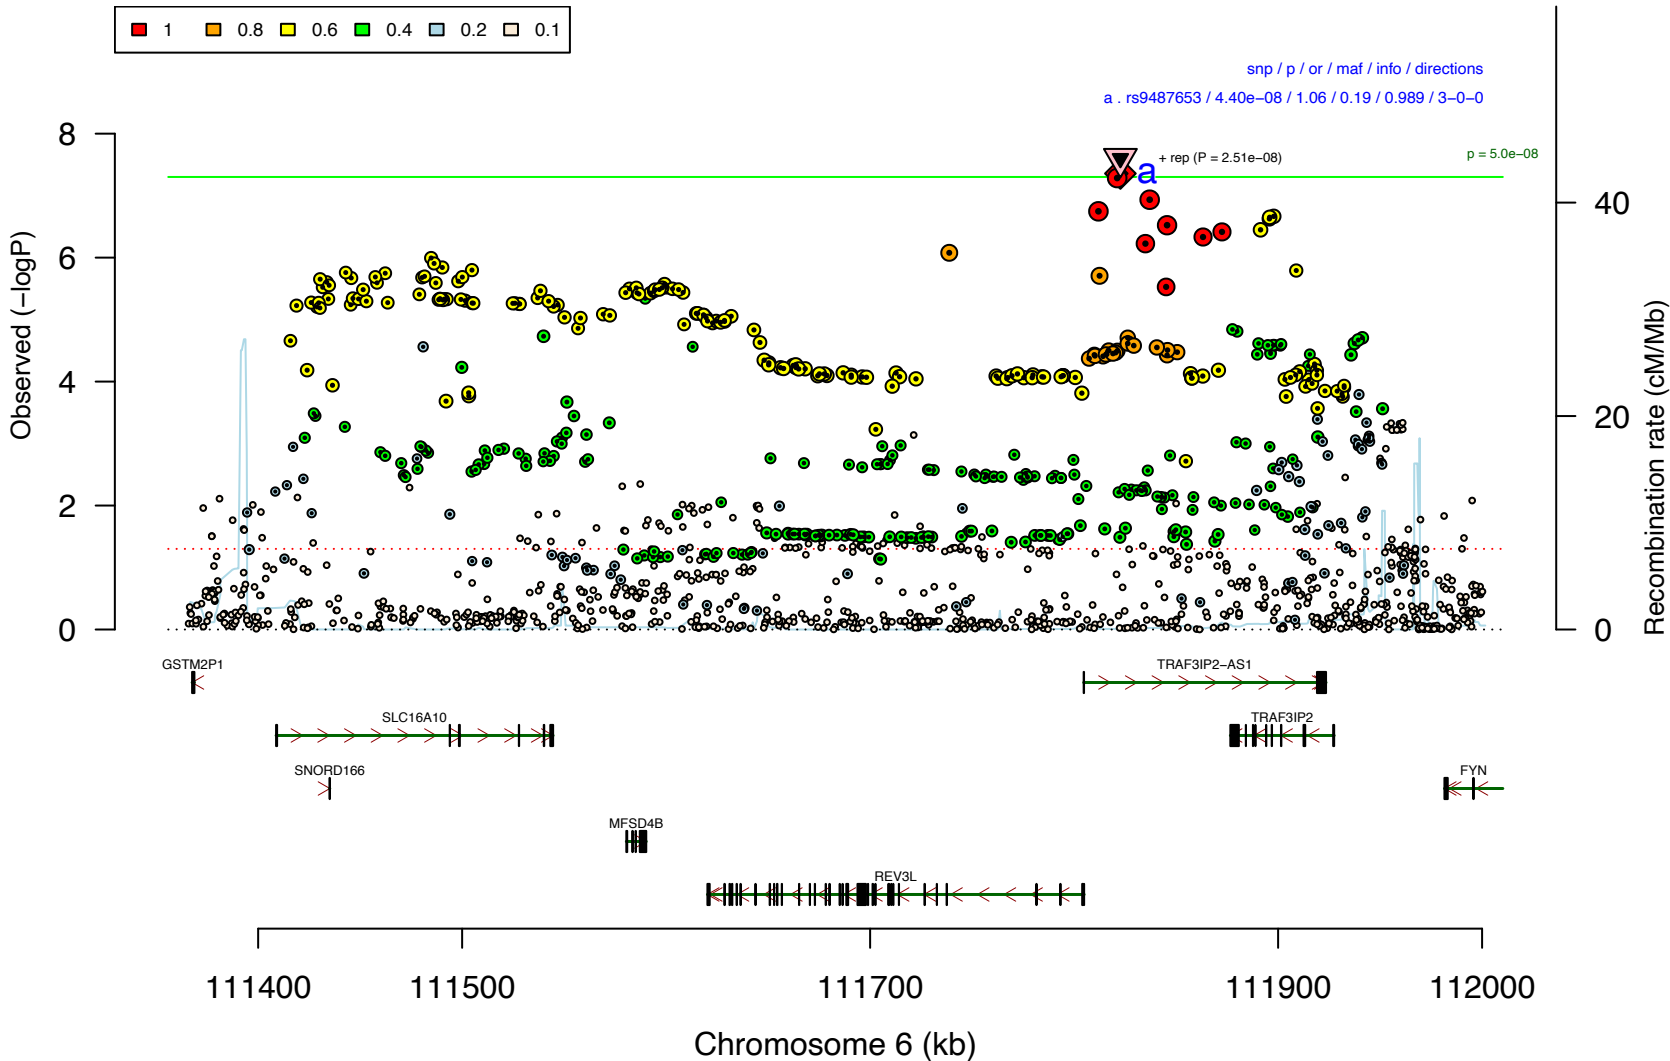

# PGC\_SCZ\_w3\_90\_0418b.245.chr9

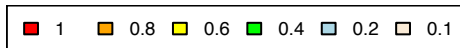

snp / p / or / maf / info / directions  
 a . rs6478858 / 2.33e-07 / 1.10 / 0.05 / 0.83 / 2-1-0

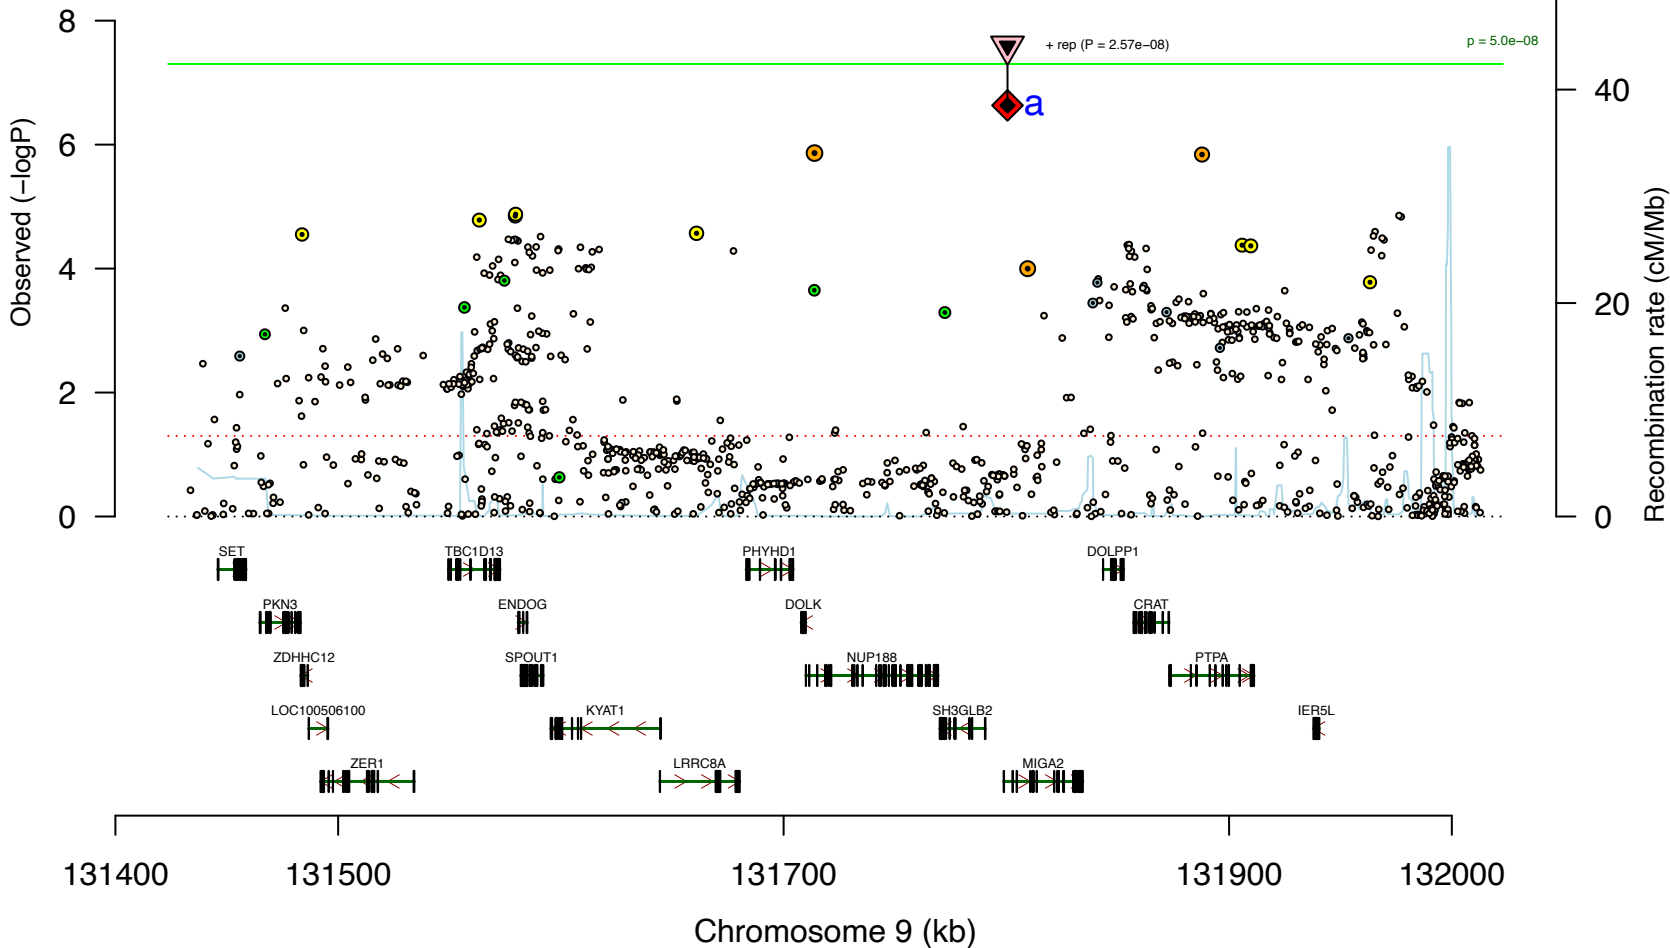



# PGC\_SCZ\_w3\_90\_0418b.246.chr3

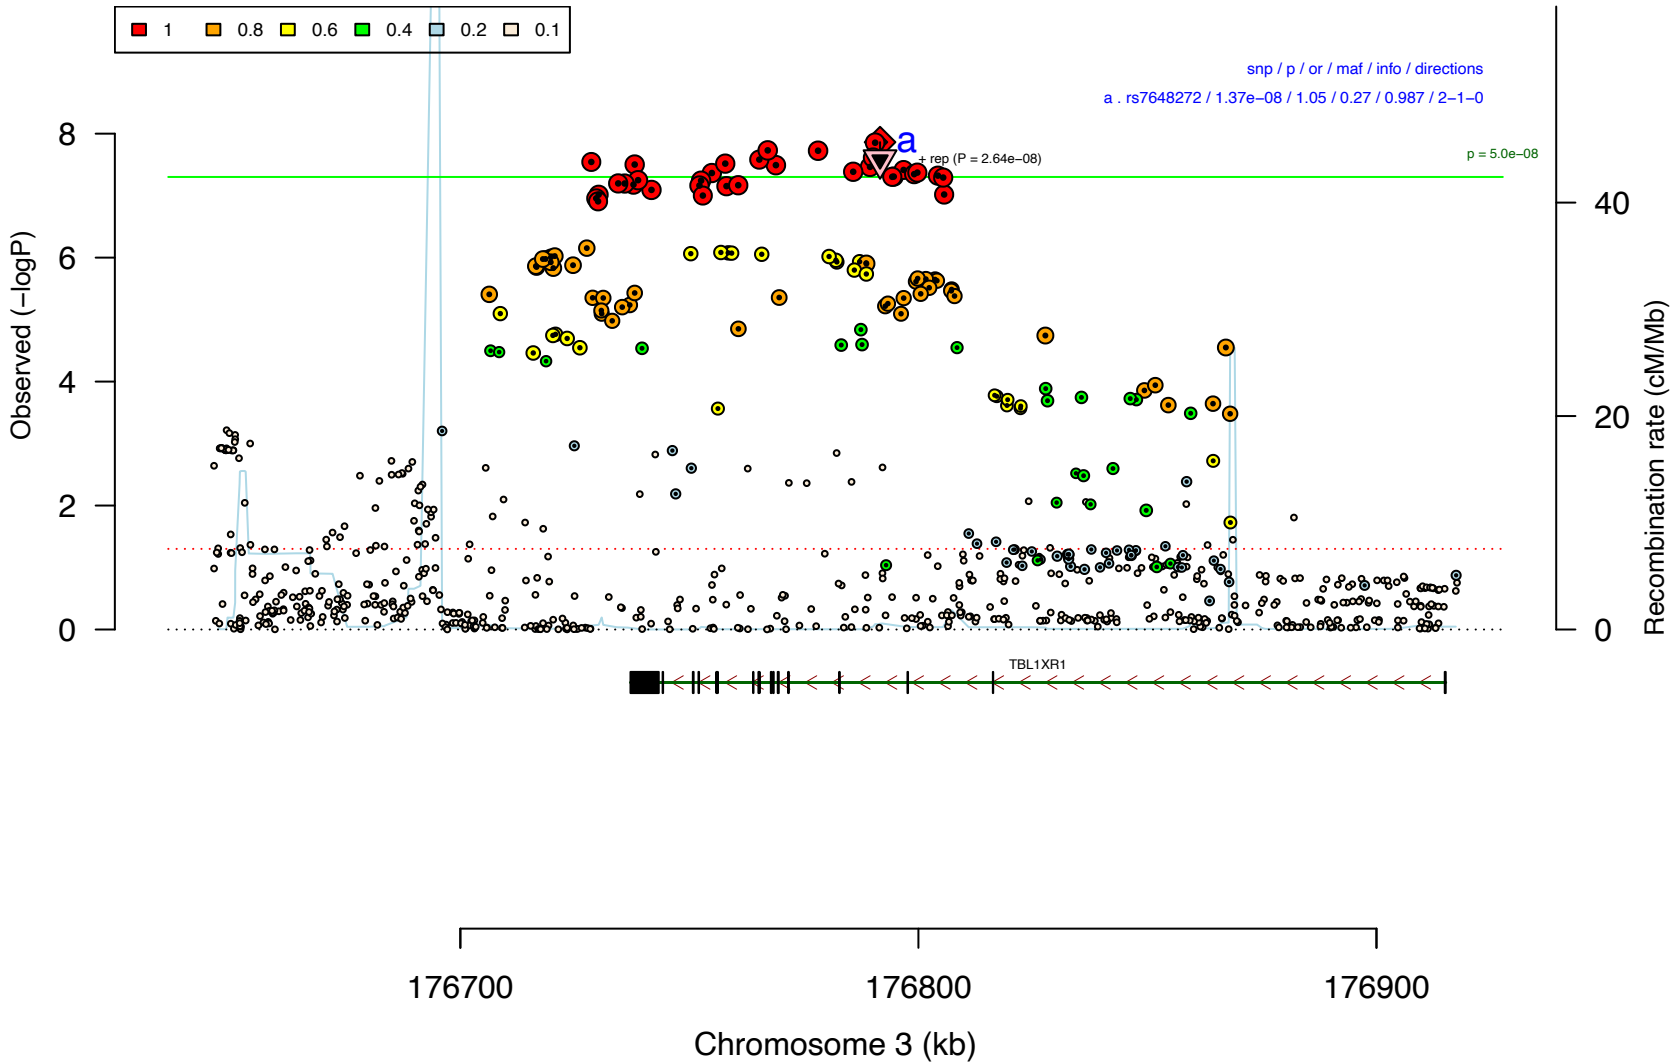

# PGC\_SCZ\_w3\_90\_0418b.247.chr4



snp / p / or / maf / info / directions  
a . rs13117857 / 5.13e-08 / 1.05 / 0.23 / 0.978 / 3-0-0

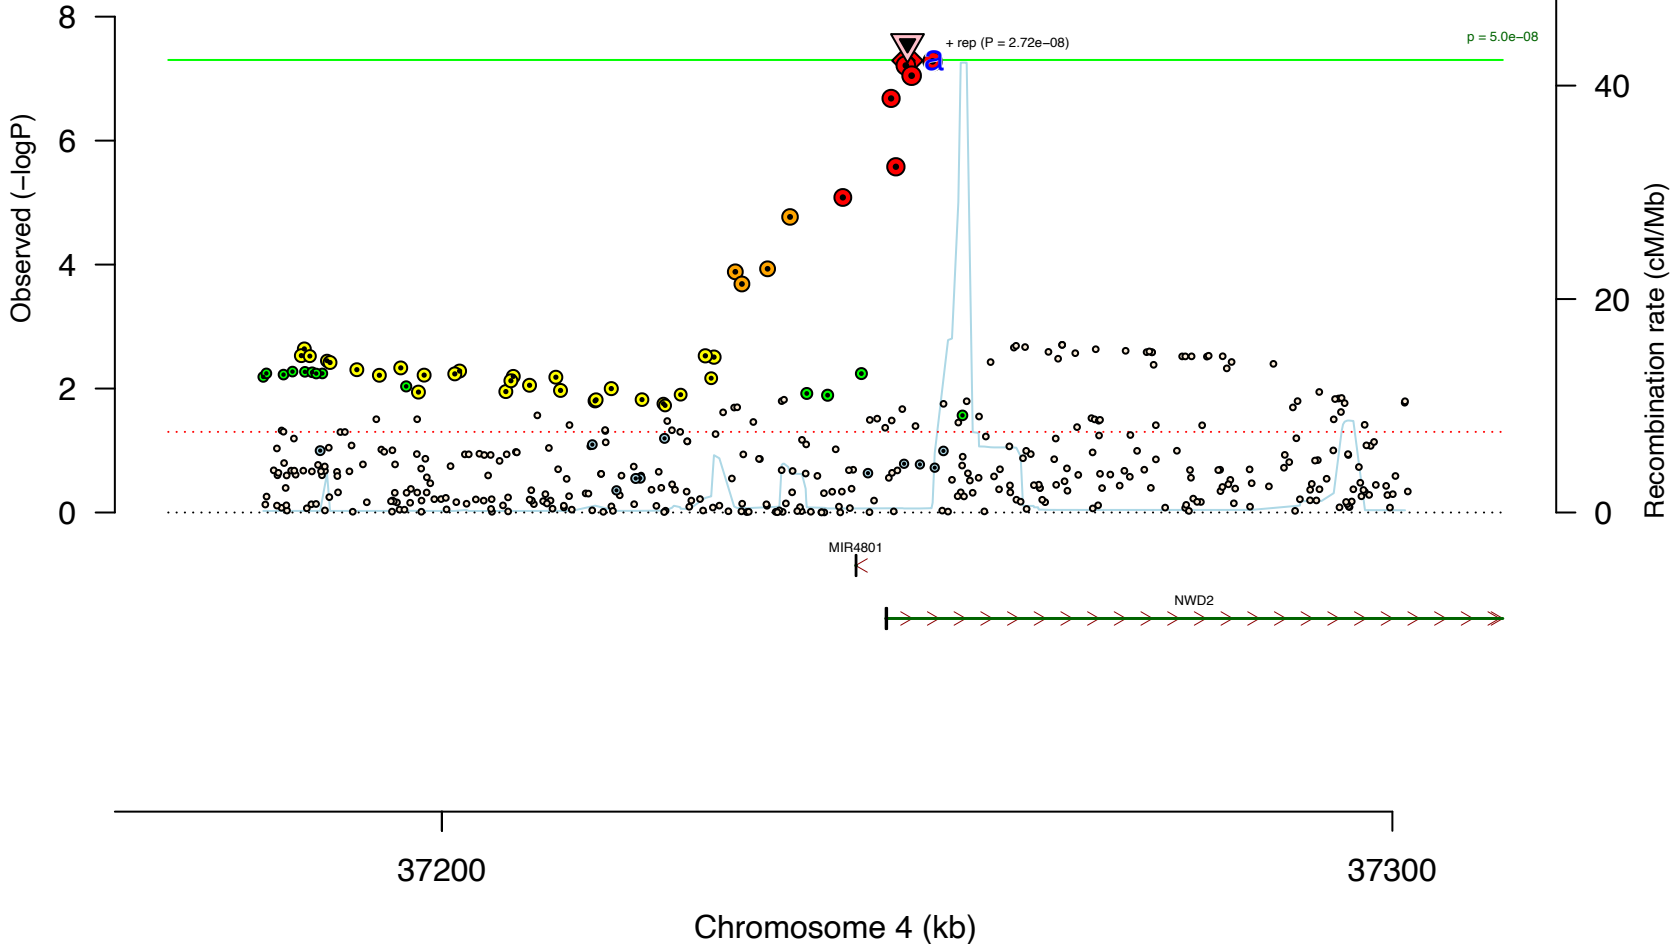

# PGC\_SCZ\_w3\_90\_0418b.248.chr6

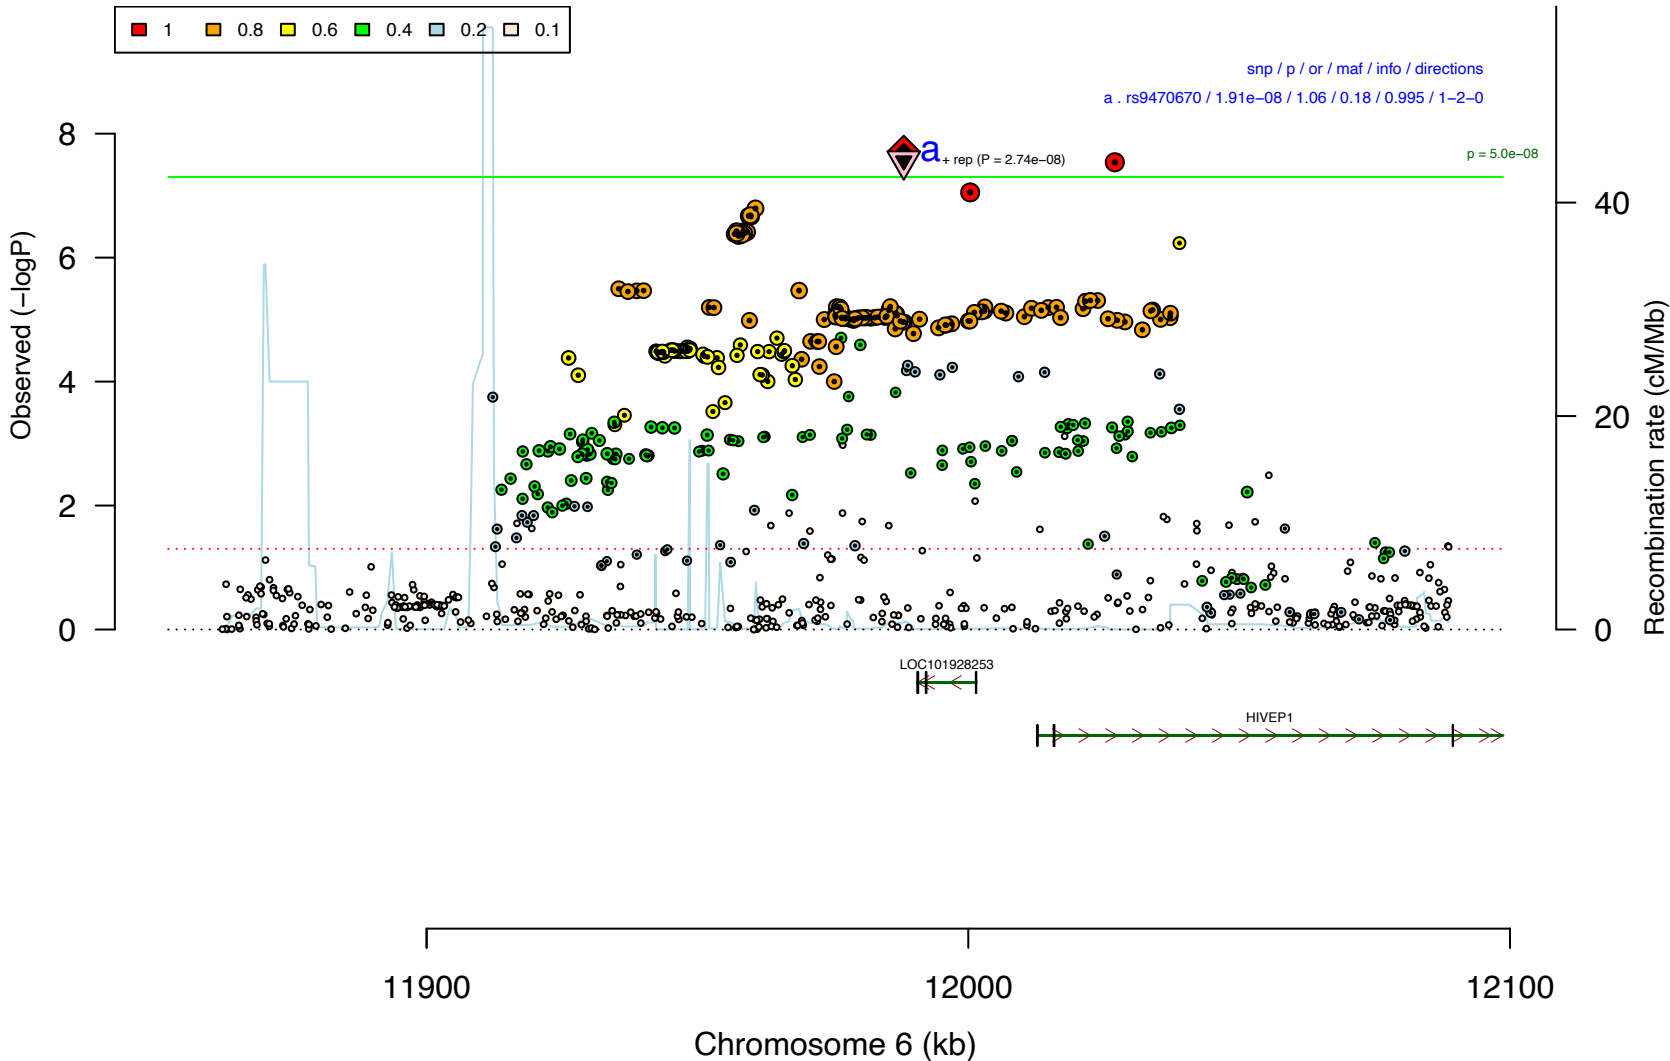

# PGC\_SCZ\_w3\_90\_0418b.249.chr6



snp / p / or / maf / info / directions  
a . rs117178087 / 3.35e-08 / 0.91 / 0.07 / 0.98 / 0-3-0

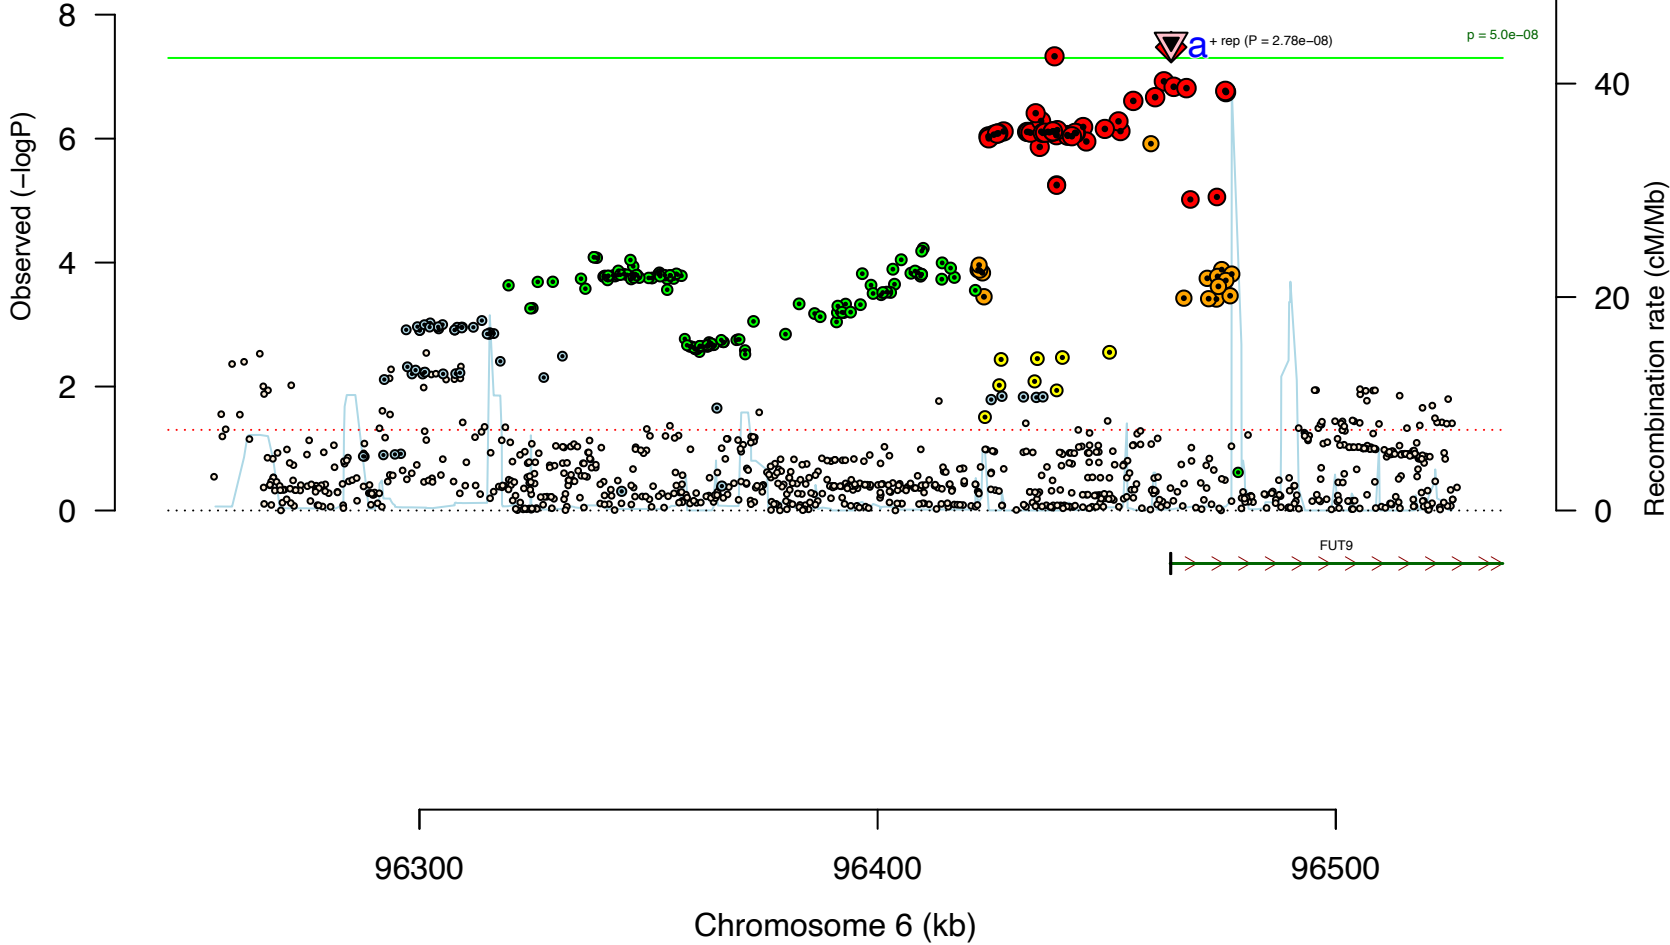

# PGC\_SCZ\_w3\_90\_0418b.250.chr10

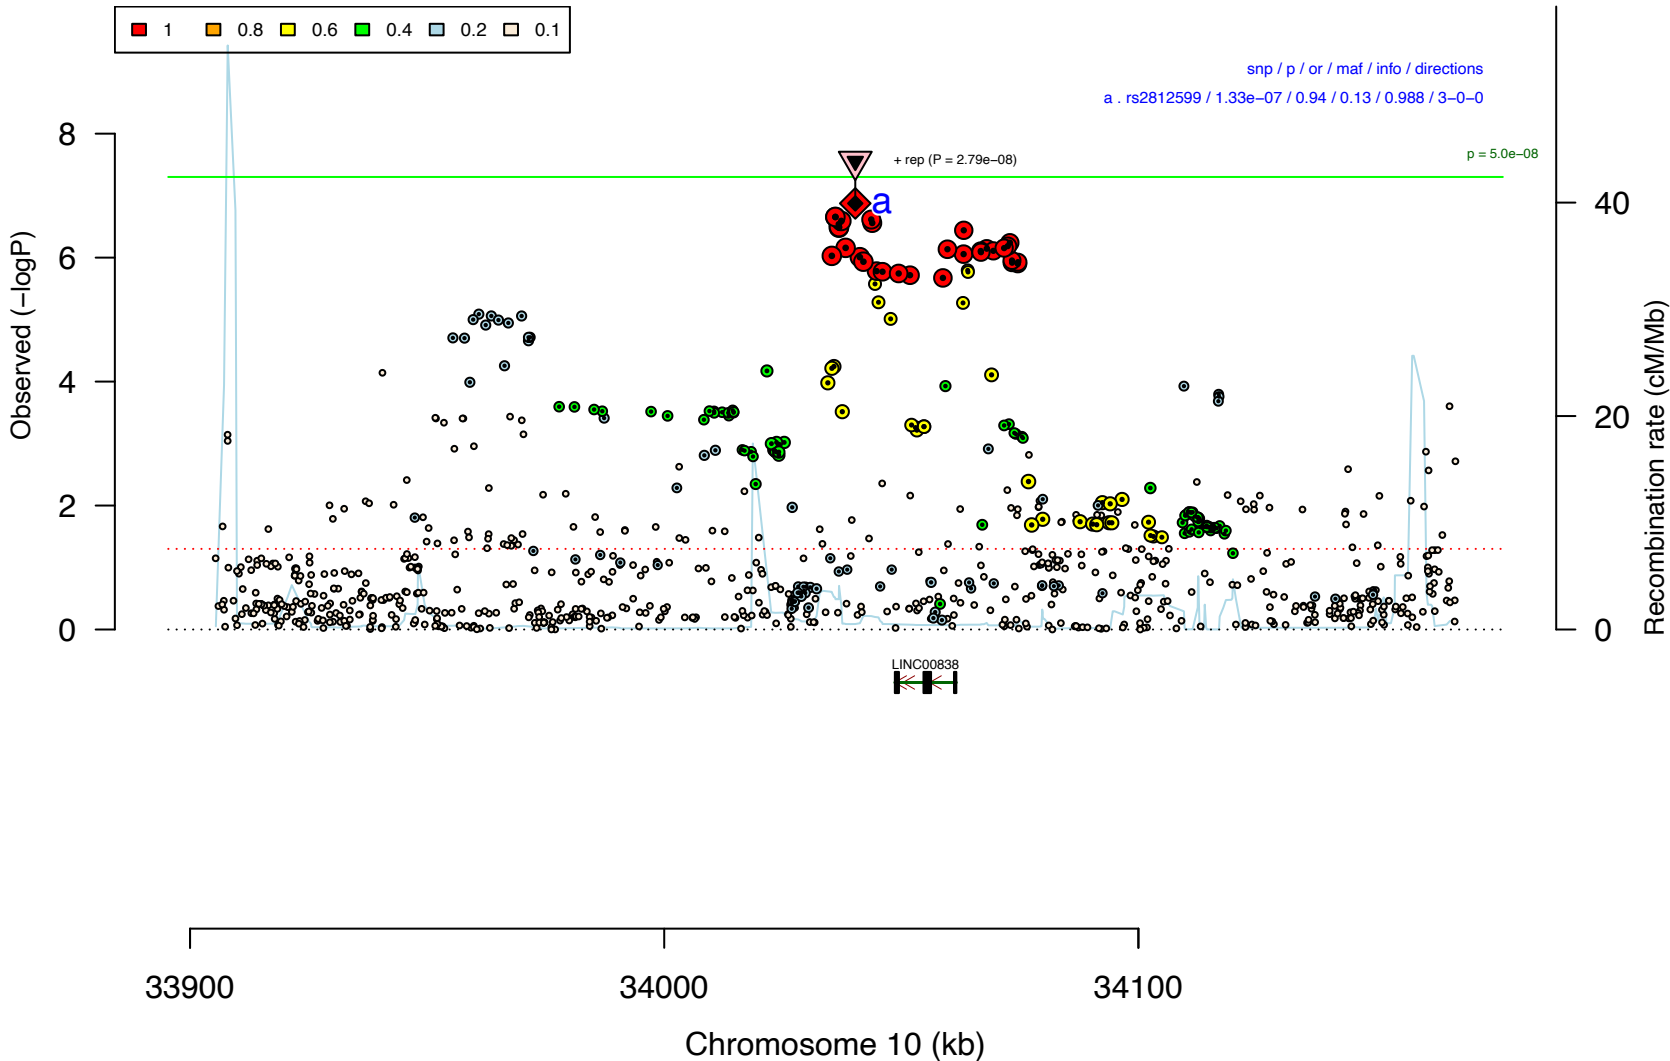

# PGC\_SCZ\_w3\_90\_0418b.251.chr6

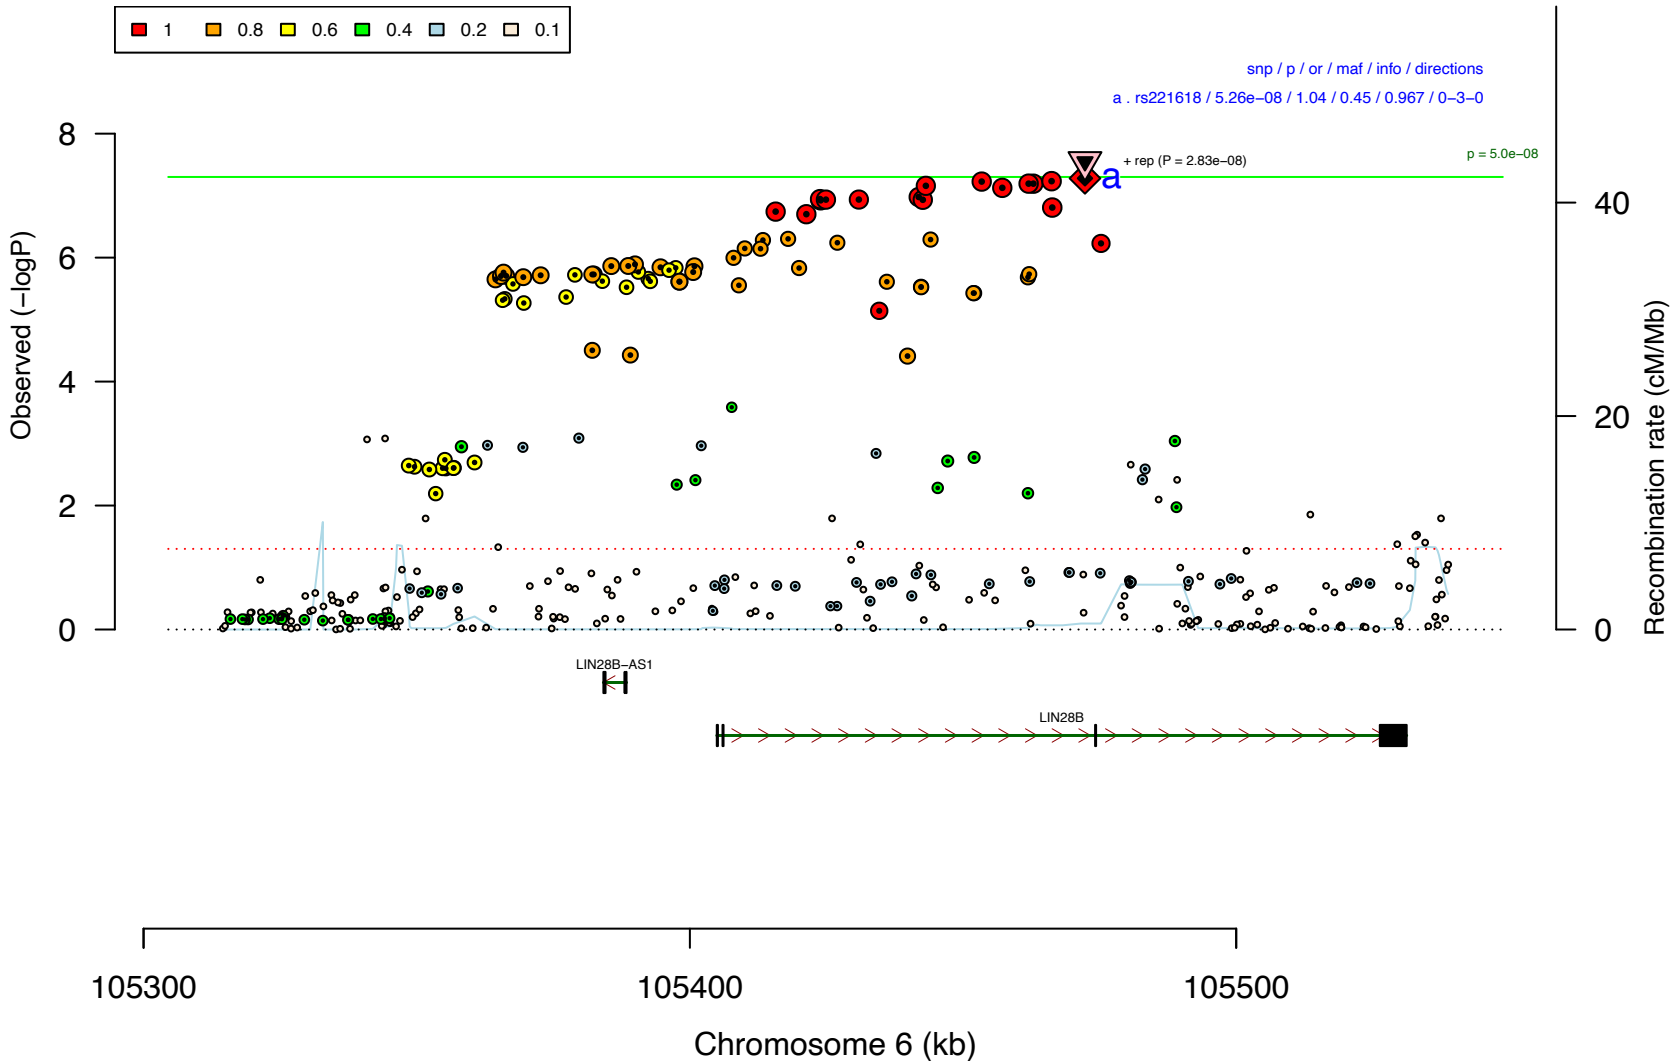

# PGC\_SCZ\_w3\_90\_0418b.252.chr8

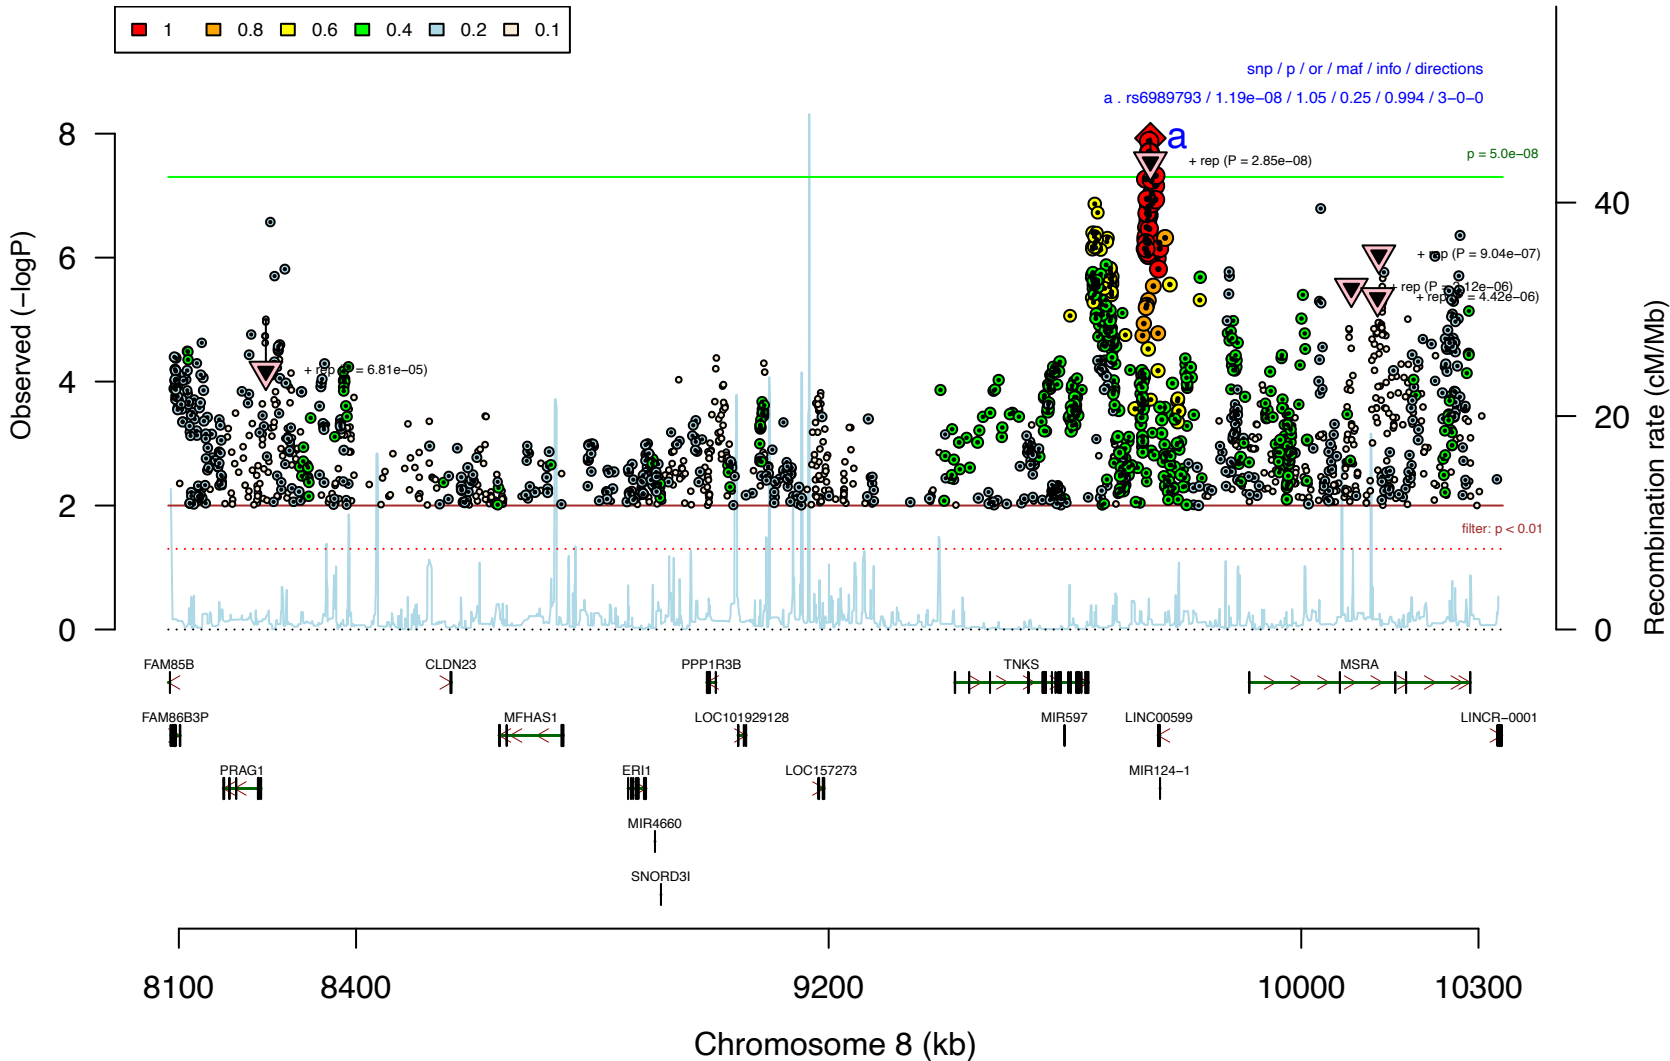

# PGC\_SCZ\_w3\_90\_0418b.253.chr7



snp / p / or / maf / info / directions  
a . rs62479287 / 1.76e-07 / 1.05 / 0.23 / 0.992 / 2-1-0

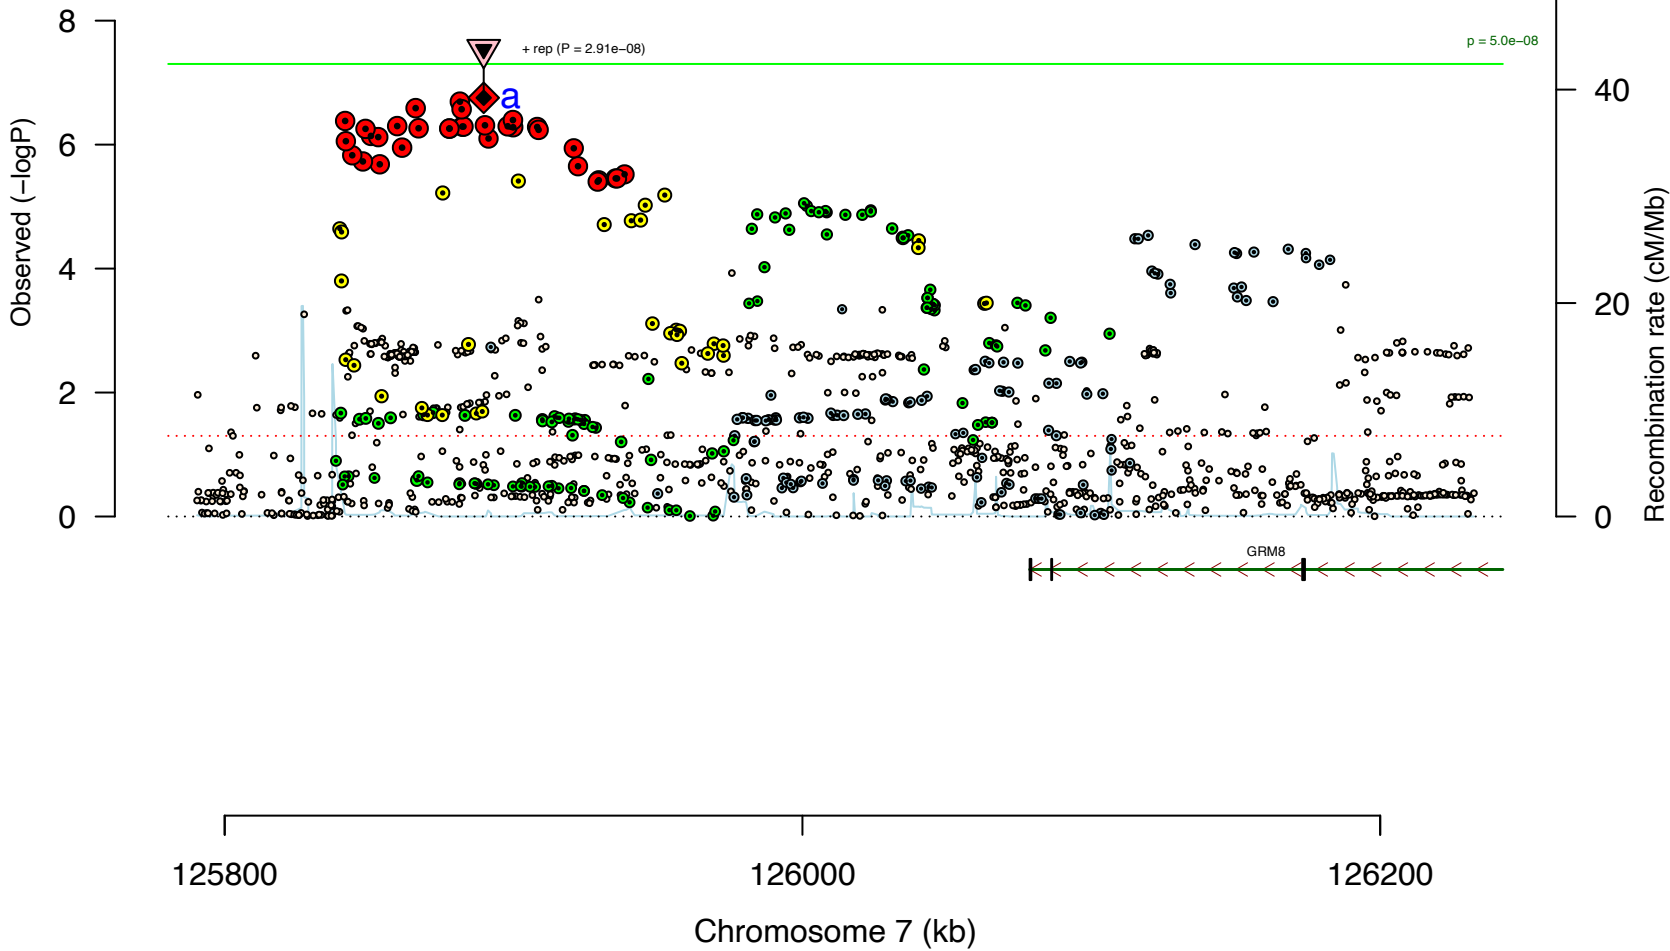



# PGC\_SCZ\_w3\_90\_0418b.254.chr11



snp / p / or / maf / info / directions  
a . rs12224032 / 9.24e-08 / 1.05 / 0.22 / 0.988 / 1-2-0

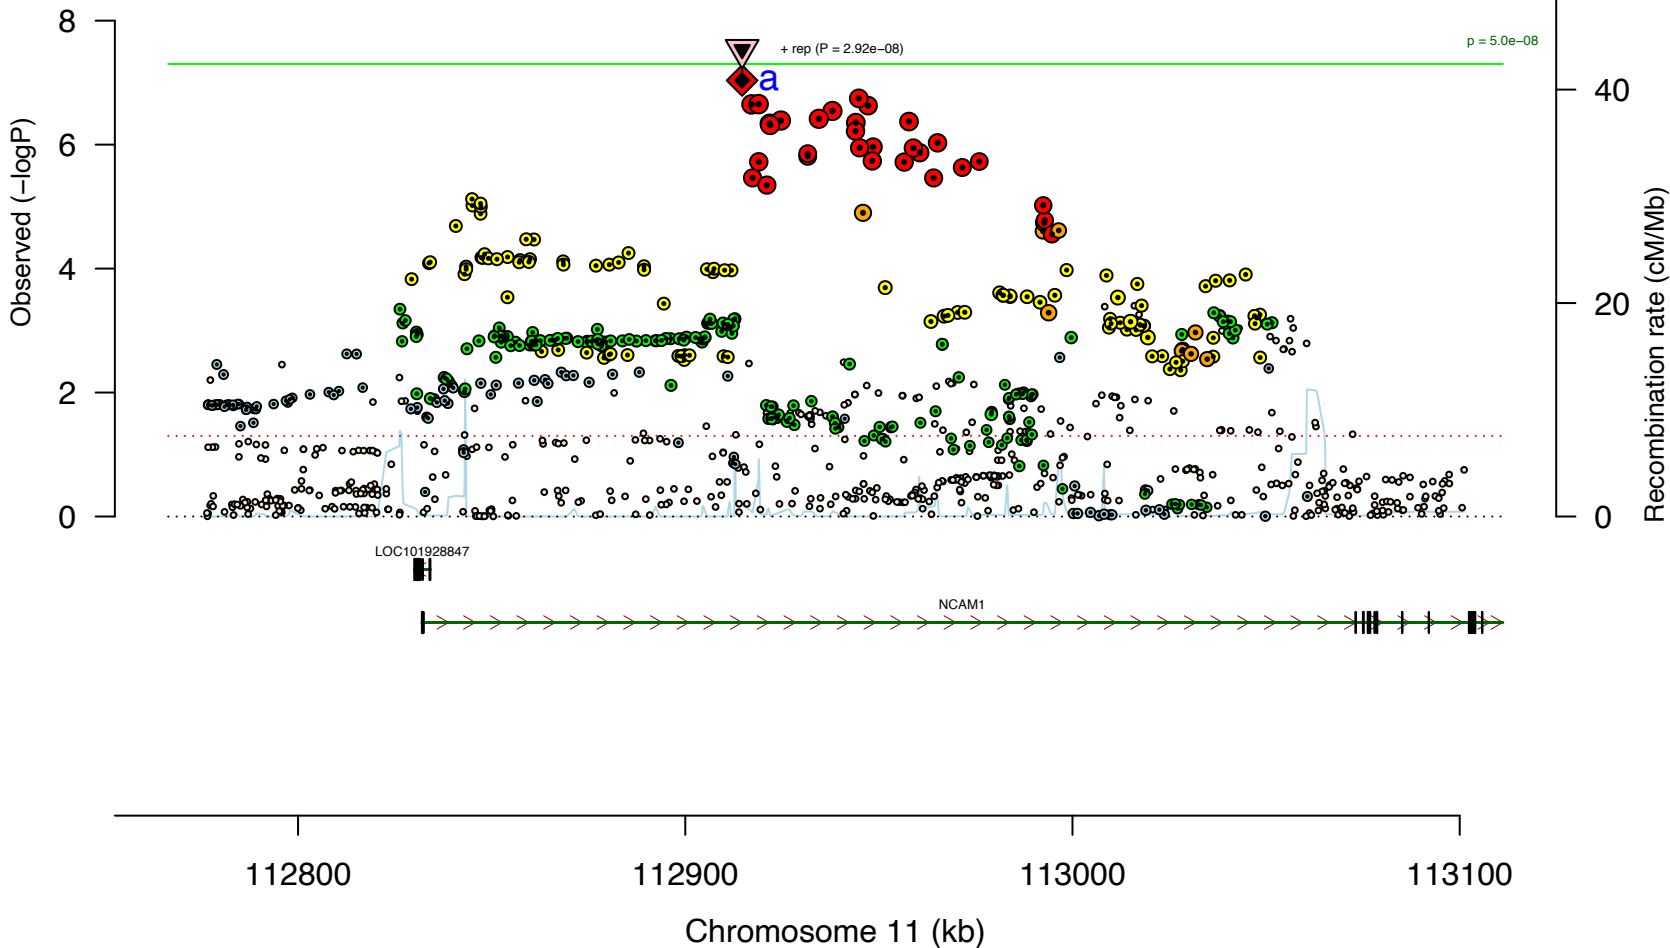

# PGC\_SCZ\_w3\_90\_0418b.255.chr16

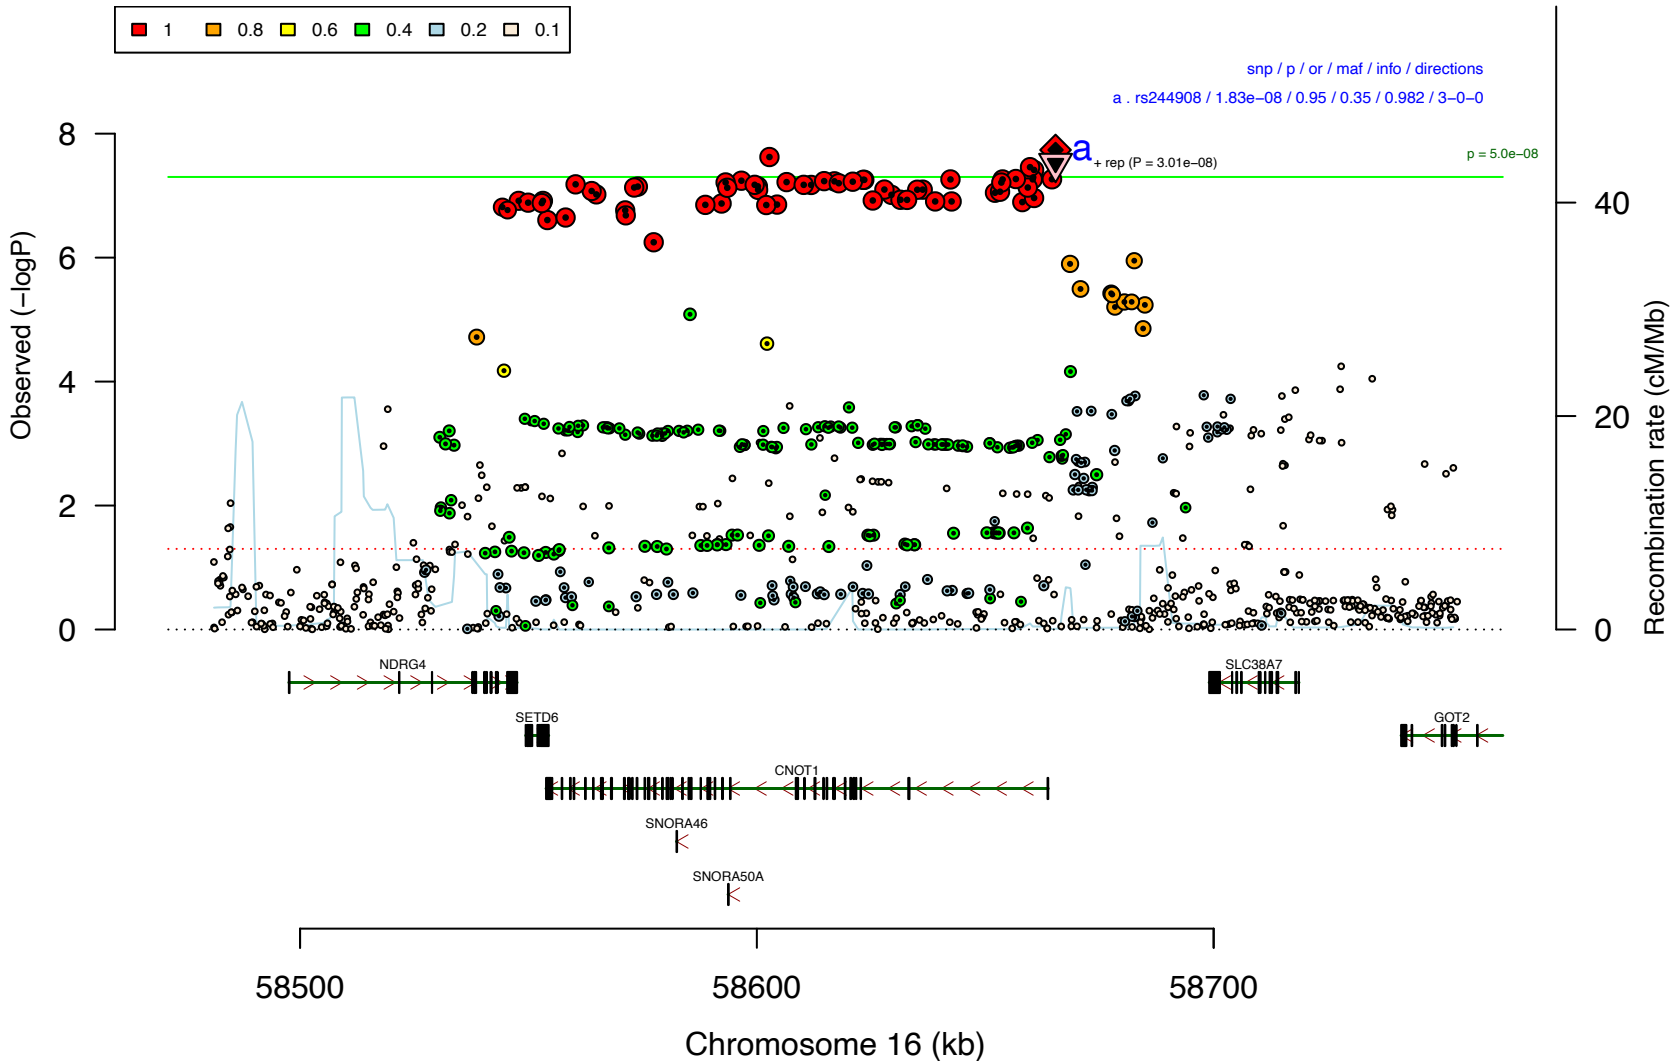

# PGC\_SCZ\_w3\_90\_0418b.256.chr2



snp / p / or / maf / info / directions  
a . rs345906 / 3.53e-08 / 1.05 / 0.43 / 0.939 / 0-3-0

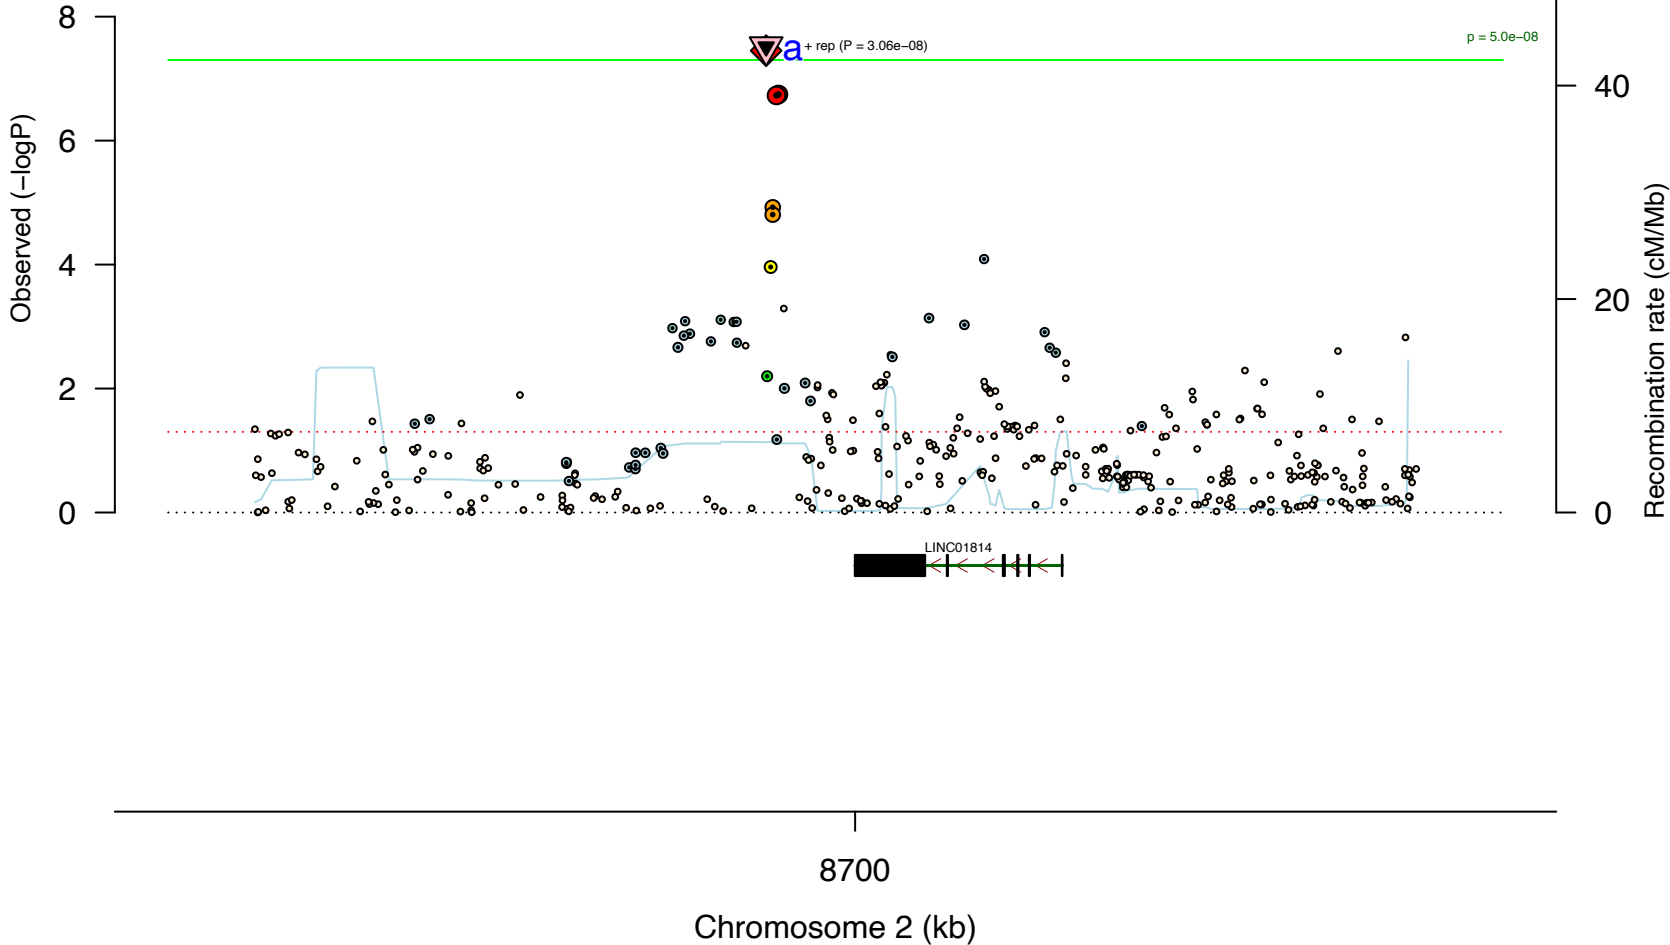

# PGC\_SCZ\_w3\_90\_0418b.257.chr7



snp / p / or / maf / info / directions  
a . rs7811528 / 1.50e-08 / 1.06 / 0.16 / 0.964 / 0-3-0

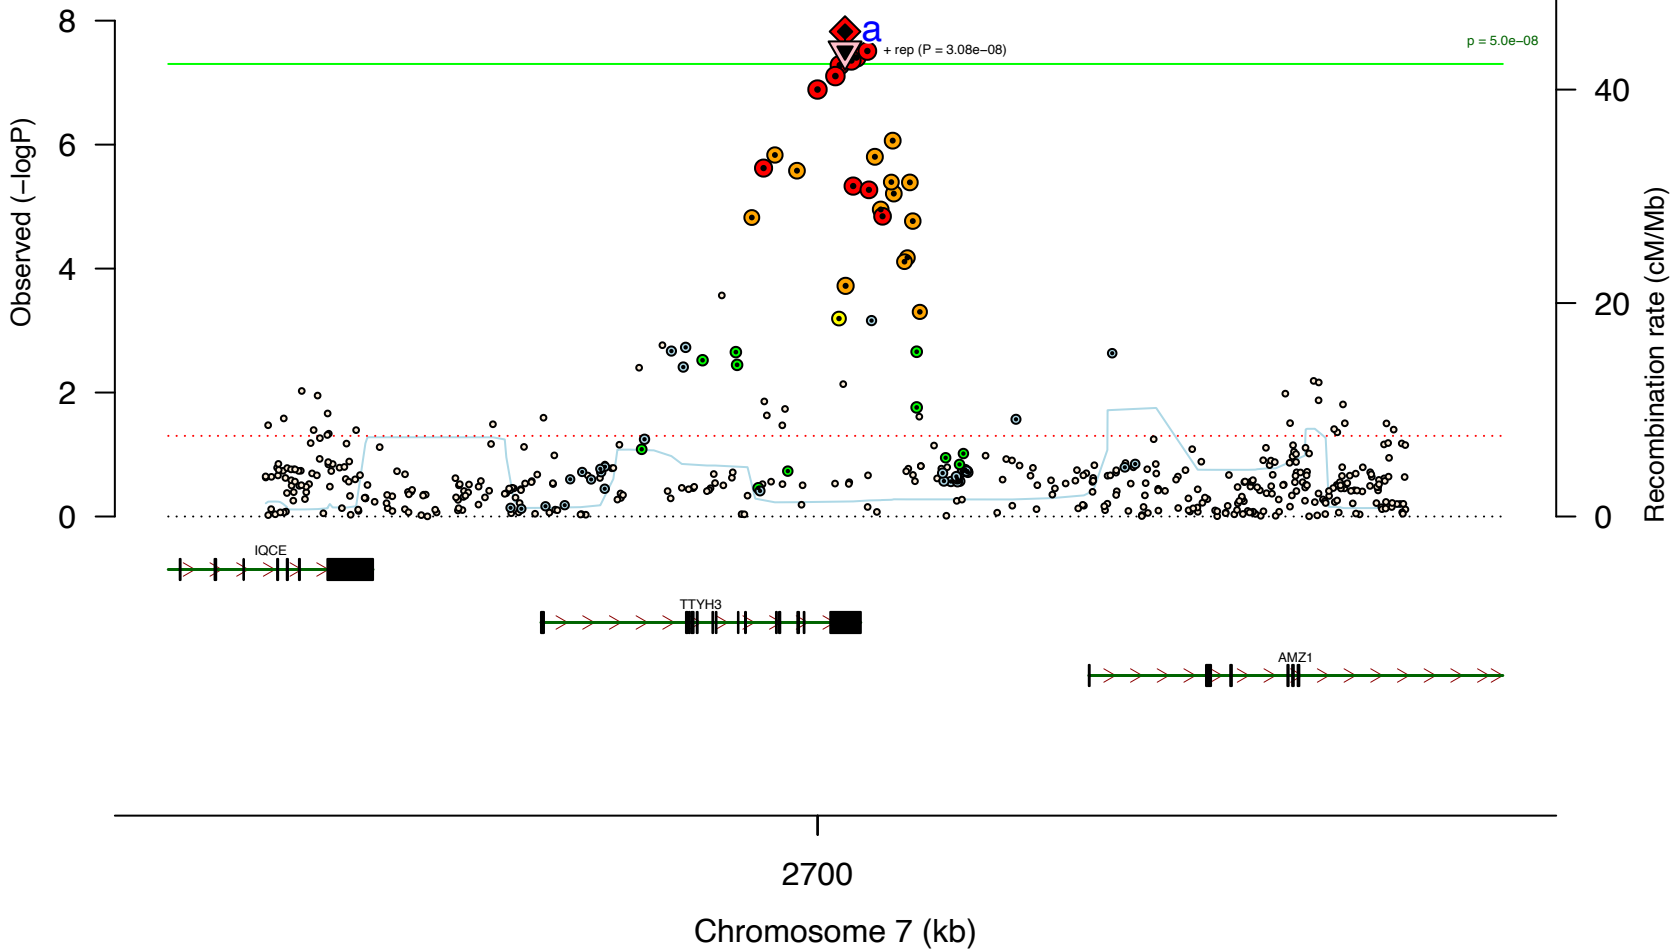

# PGC\_SCZ\_w3\_90\_0418b.258.chr3

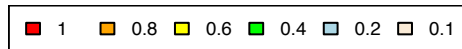

snp / p / or / maf / info / directions

a . rs11129383 / 3.98e-08 / 1.05 / 0.29 / 0.965 / 2-1-0

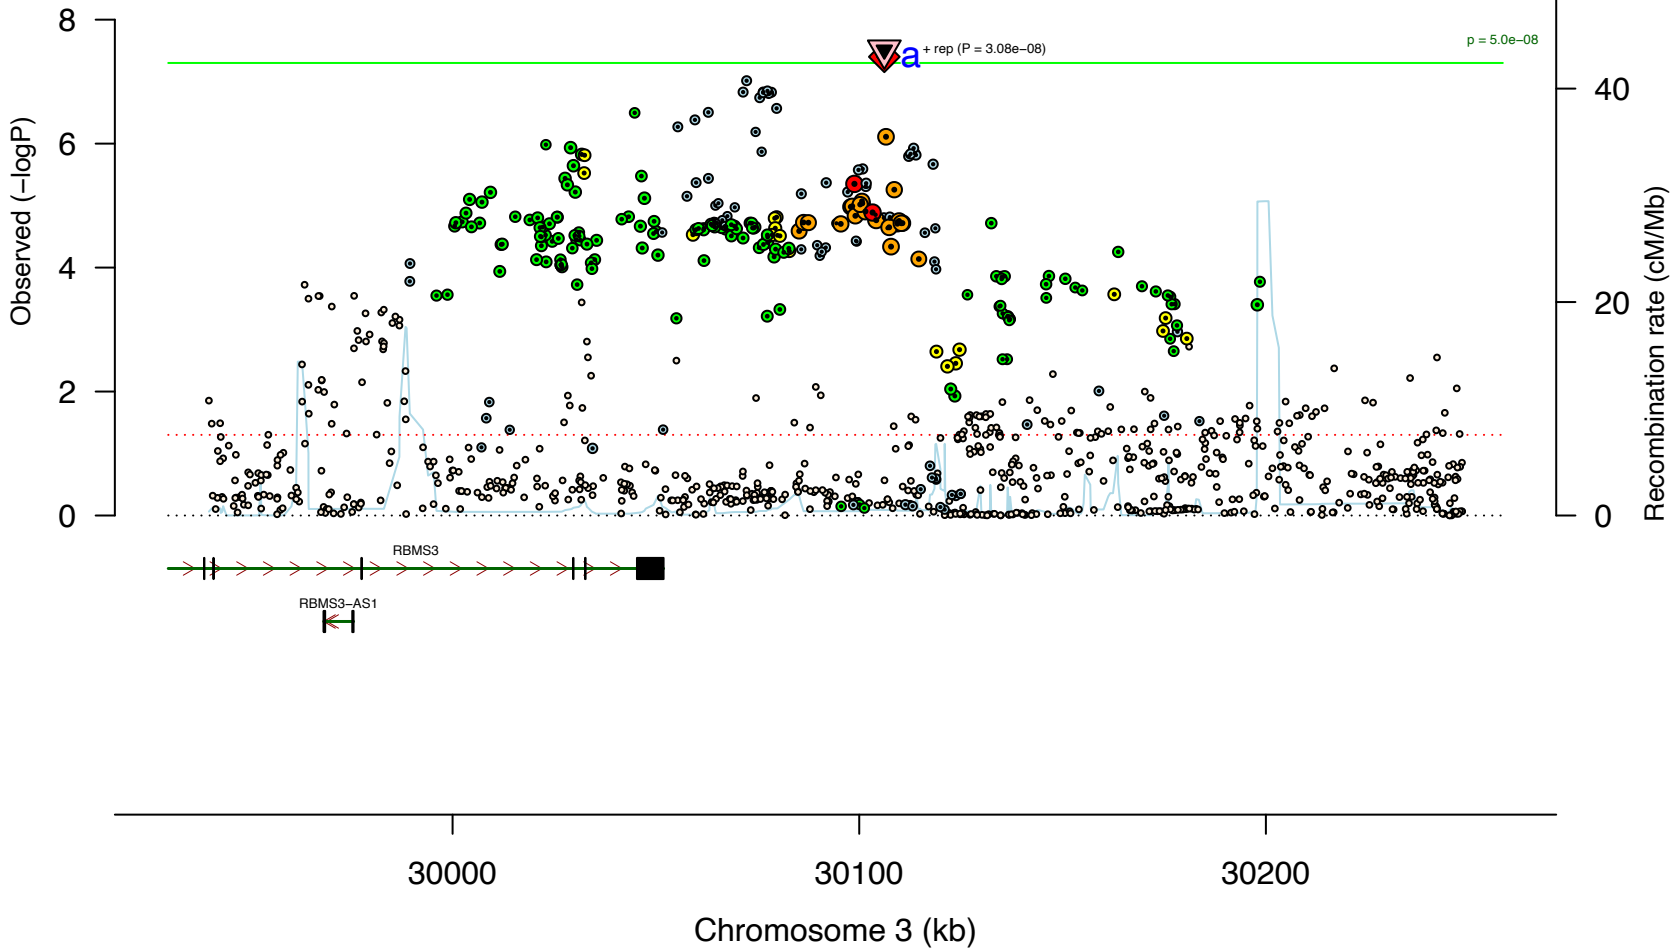

# PGC\_SCZ\_w3\_90\_0418b.259.chr17



snp / p / or / maf / info / directions  
 a . rs3909258 / 3.51e-08 / 1.04 / 0.47 / 0.982 / 0-3-0

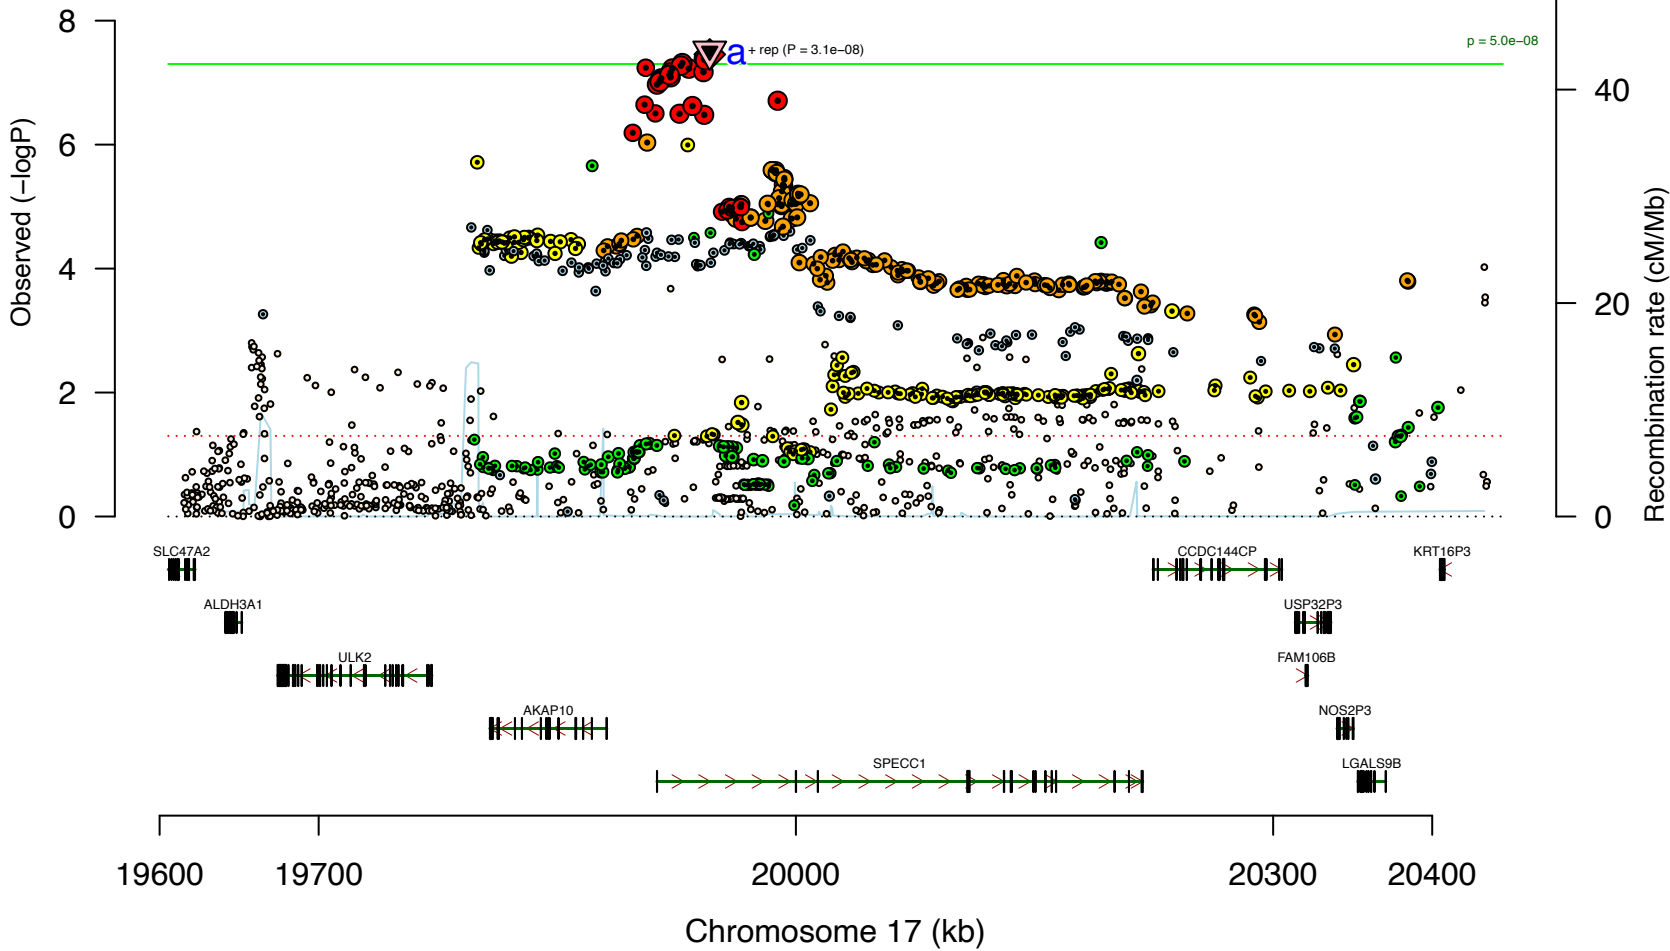

# PGC\_SCZ\_w3\_90\_0418b.260.chr6



snp / p / or / maf / info / directions  
 a . rs9341835 / 4.52e-07 / 1.04 / 0.47 / 0.958 / 1-2-0

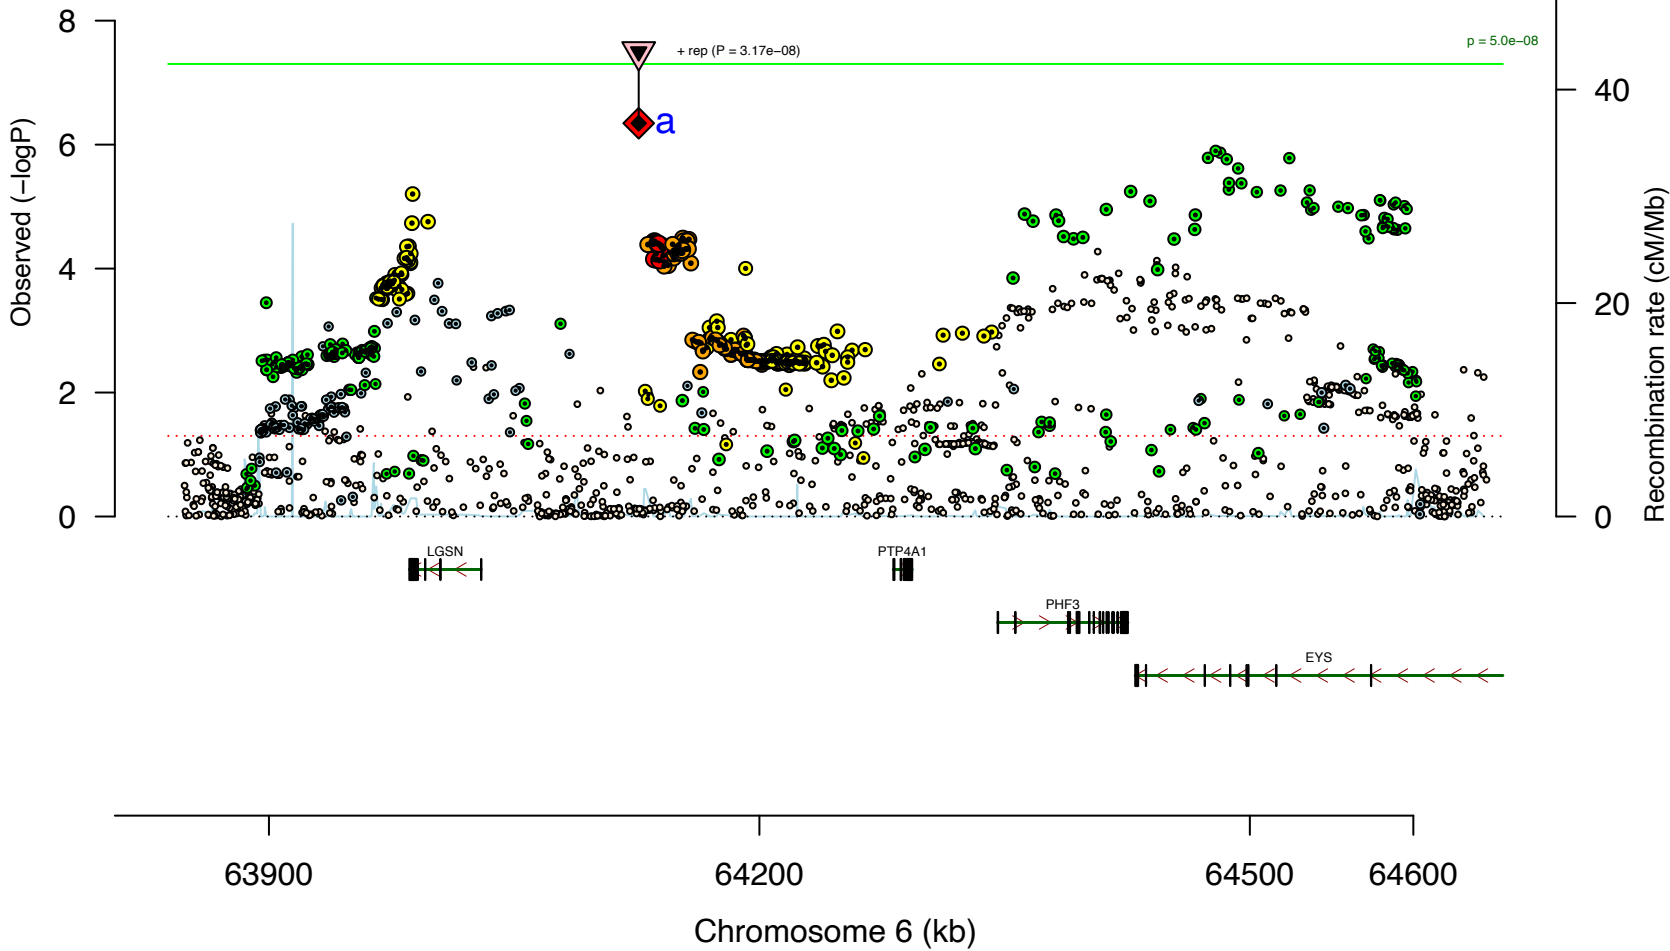

# PGC\_SCZ\_w3\_90\_0418b.261.chr4

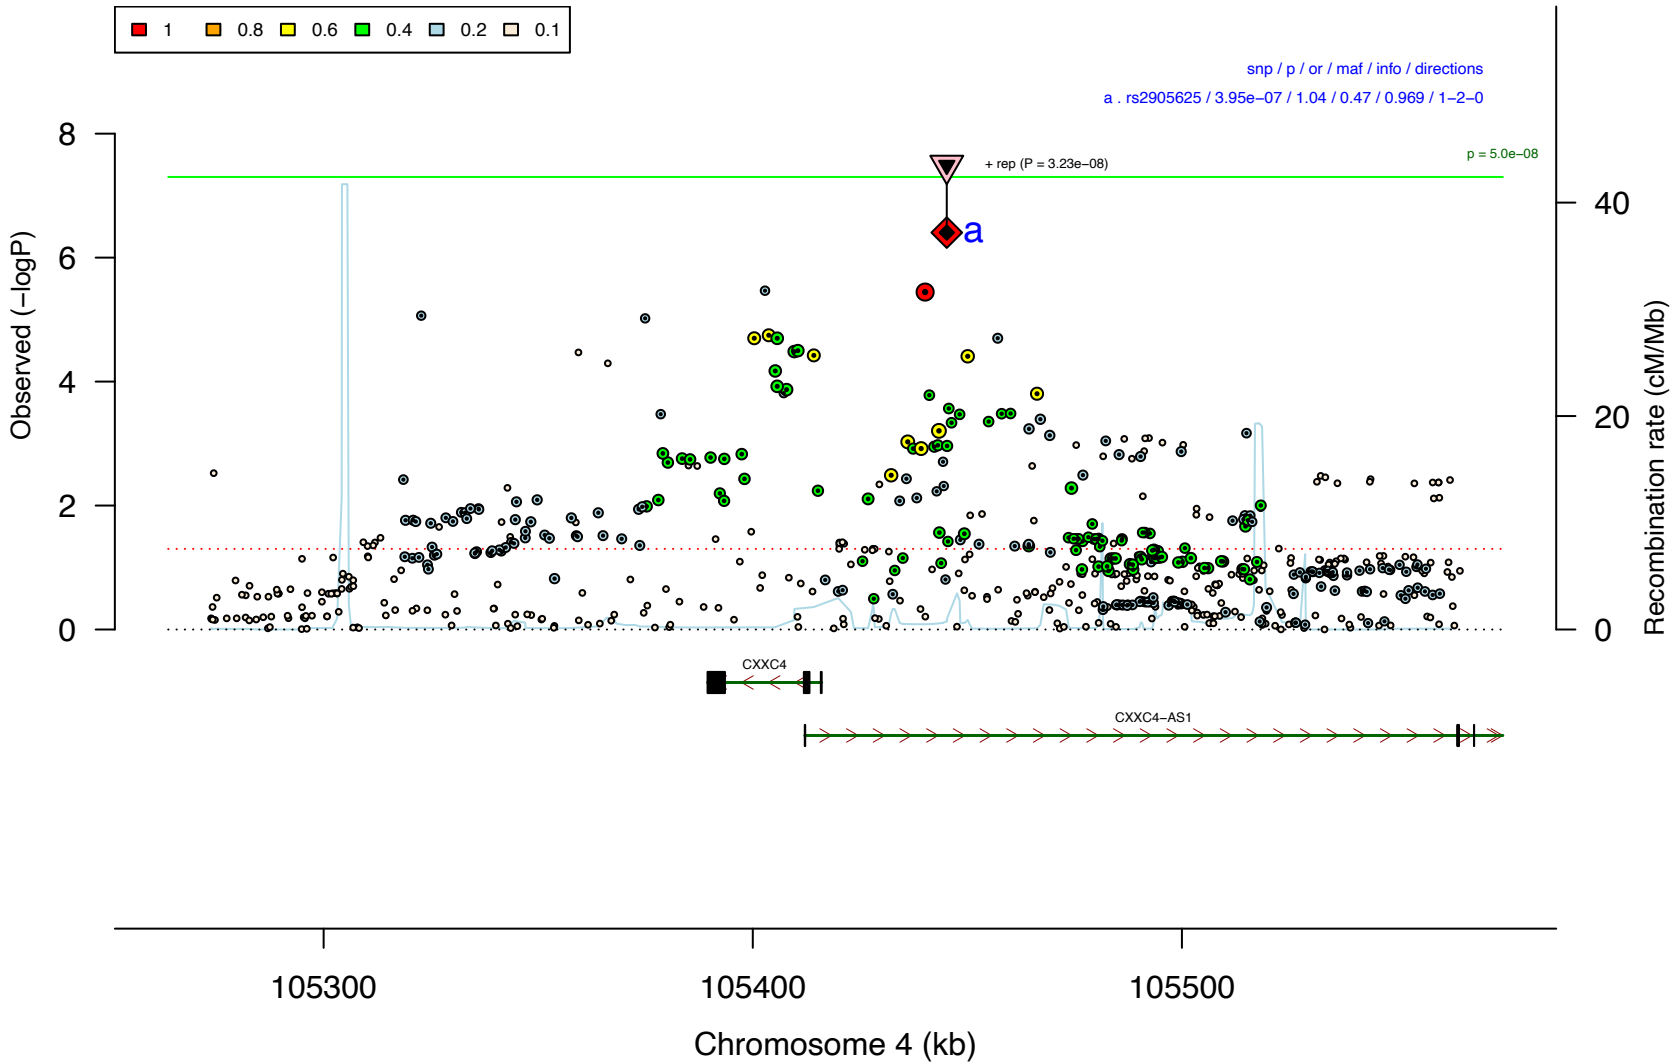



# PGC\_SCZ\_w3\_90\_0418b.262.chr11

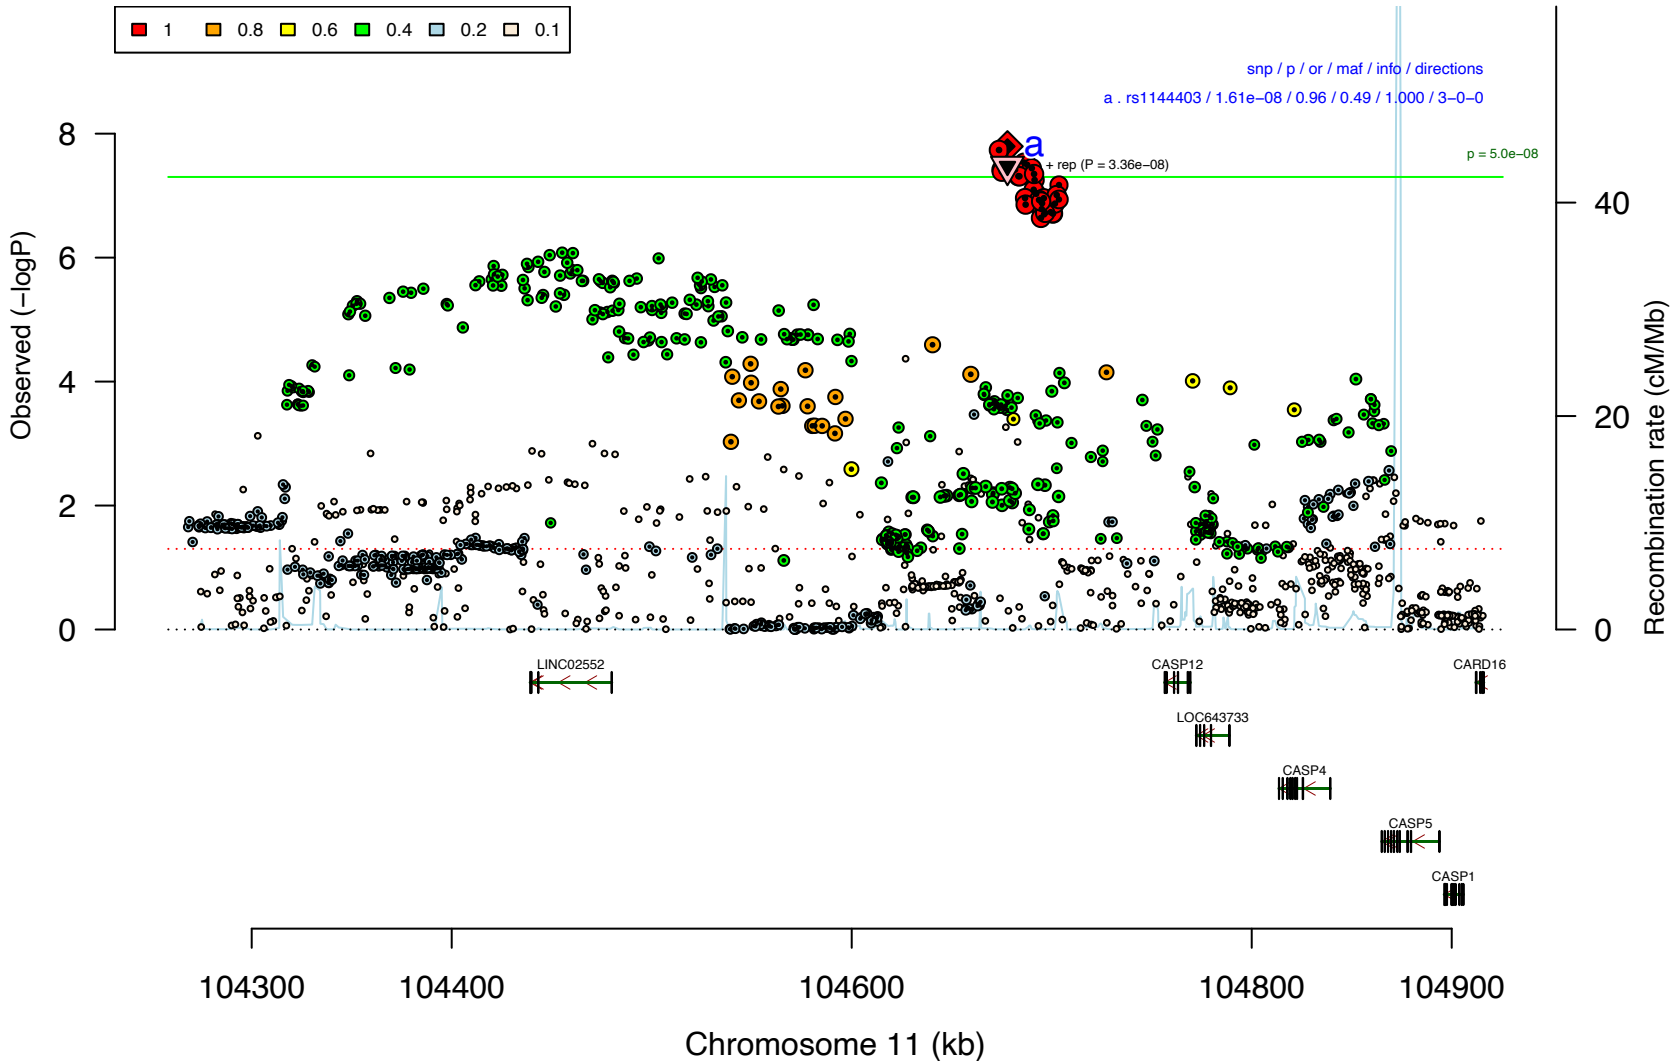

# PGC\_SCZ\_w3\_90\_0418b.263.chr6



snp / p / or / maf / info / directions  
a . rs7773962 / 5.28e-08 / 0.96 / 0.37 / 0.996 / 3-0-0

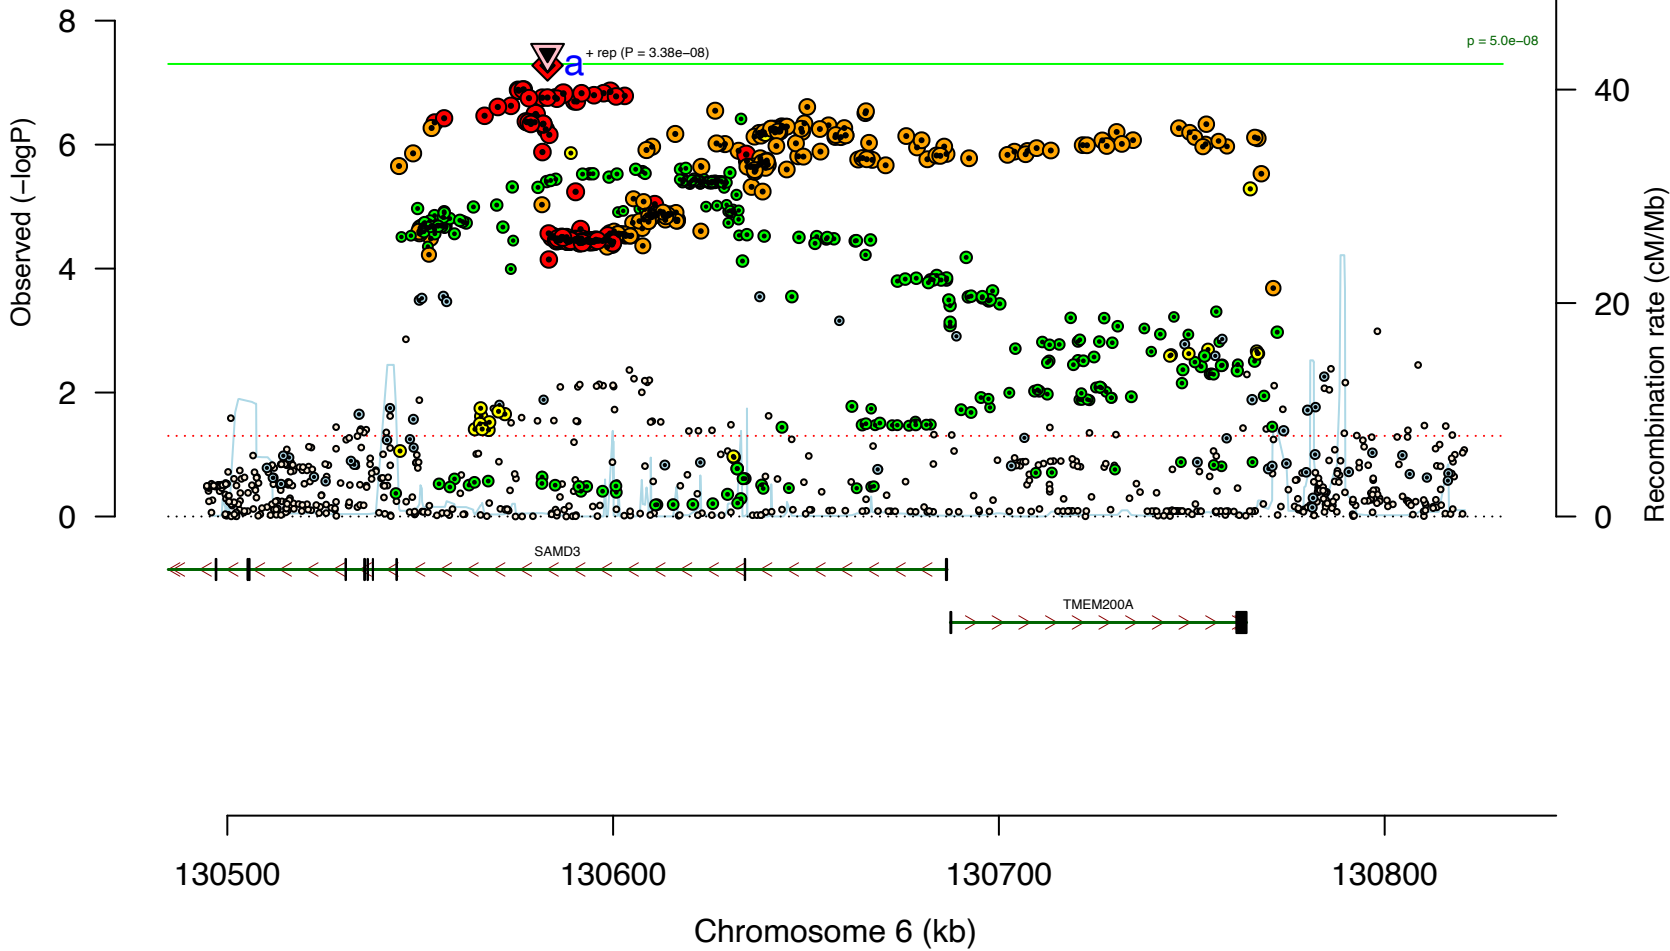

# PGC\_SCZ\_w3\_90\_0418b.264.chr10



snp / p / or / maf / info / directions  
a . rs10995239 / 7.49e-08 / 0.96 / 0.35 / 0.991 / 3-0-0

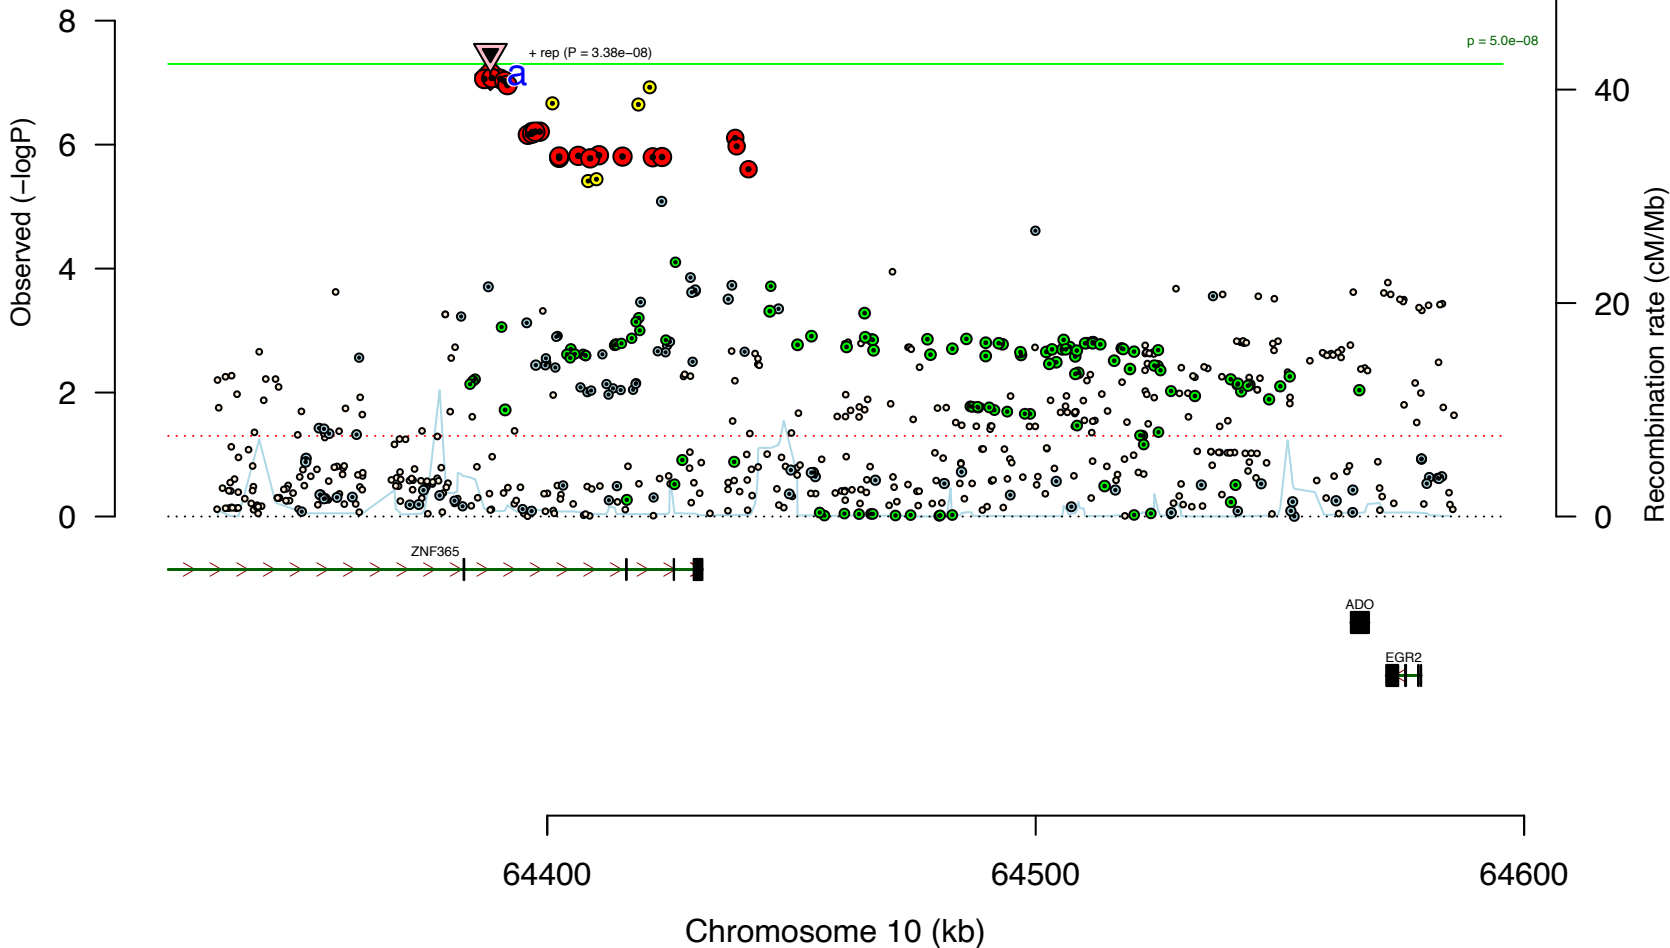

# PGC\_SCZ\_w3\_90\_0418b.265.chr1



snp / p / or / maf / info / directions  
 a . rs11122119 / 7.99e-08 / 1.04 / 0.32 / 0.982 / 2-1-0

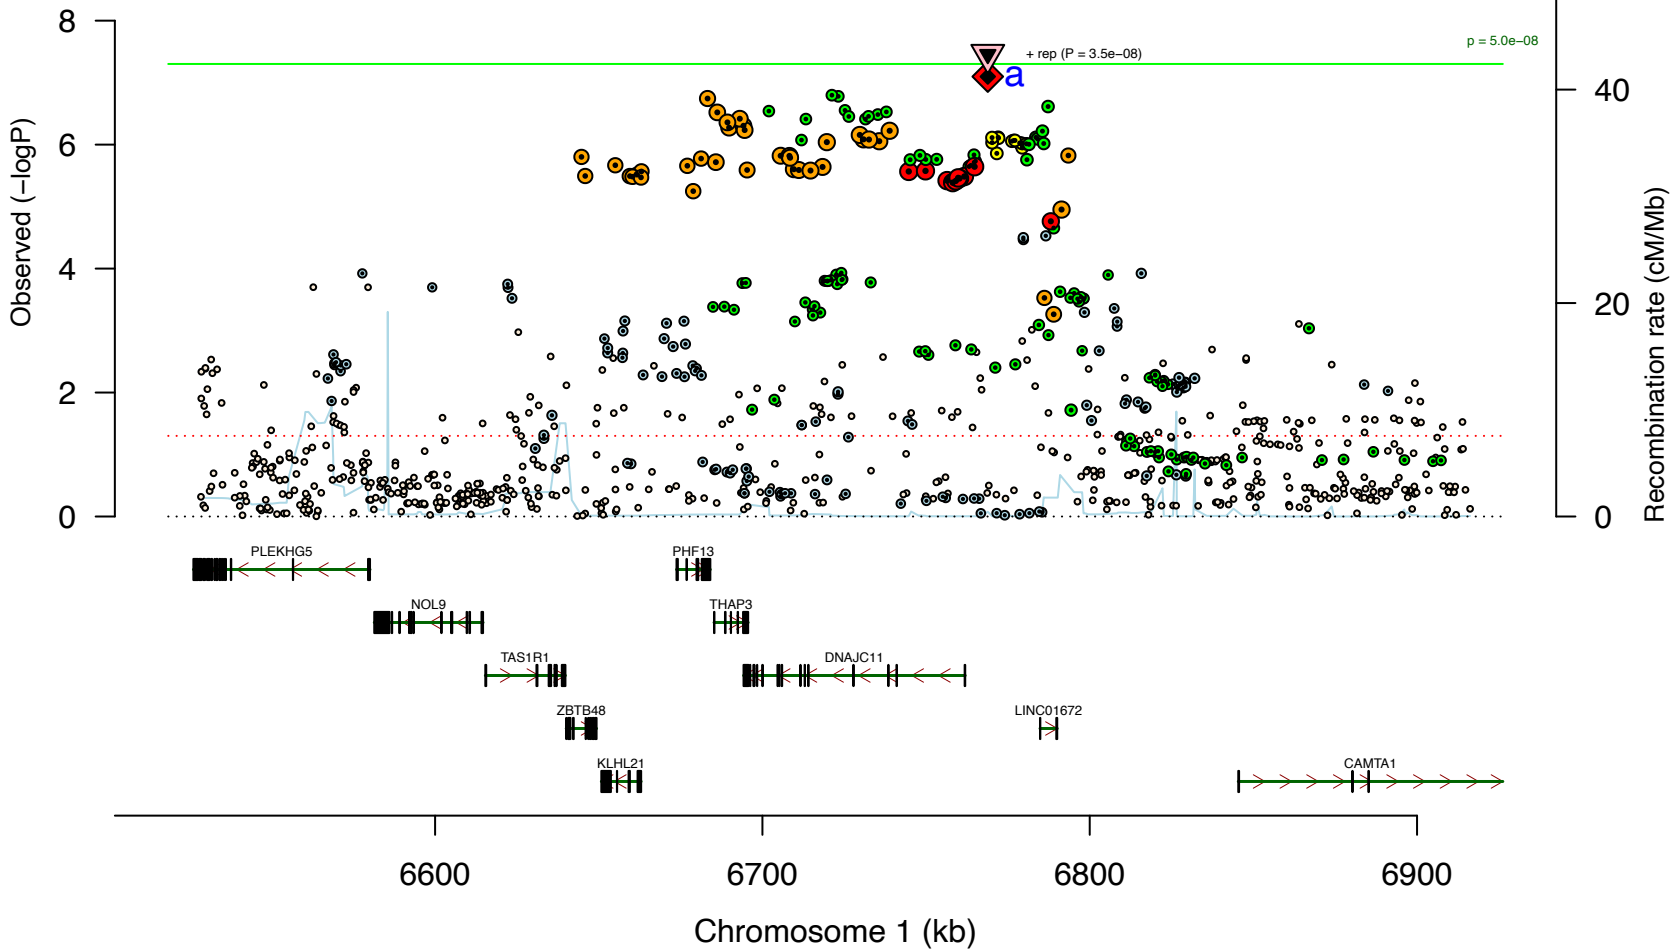

# PGC\_SCZ\_w3\_90\_0418b.266.chr12



snp / p / or / maf / info / directions  
a . rs11064369 / 4.92e-08 / 1.04 / 0.35 / 0.949 / 0-3-0

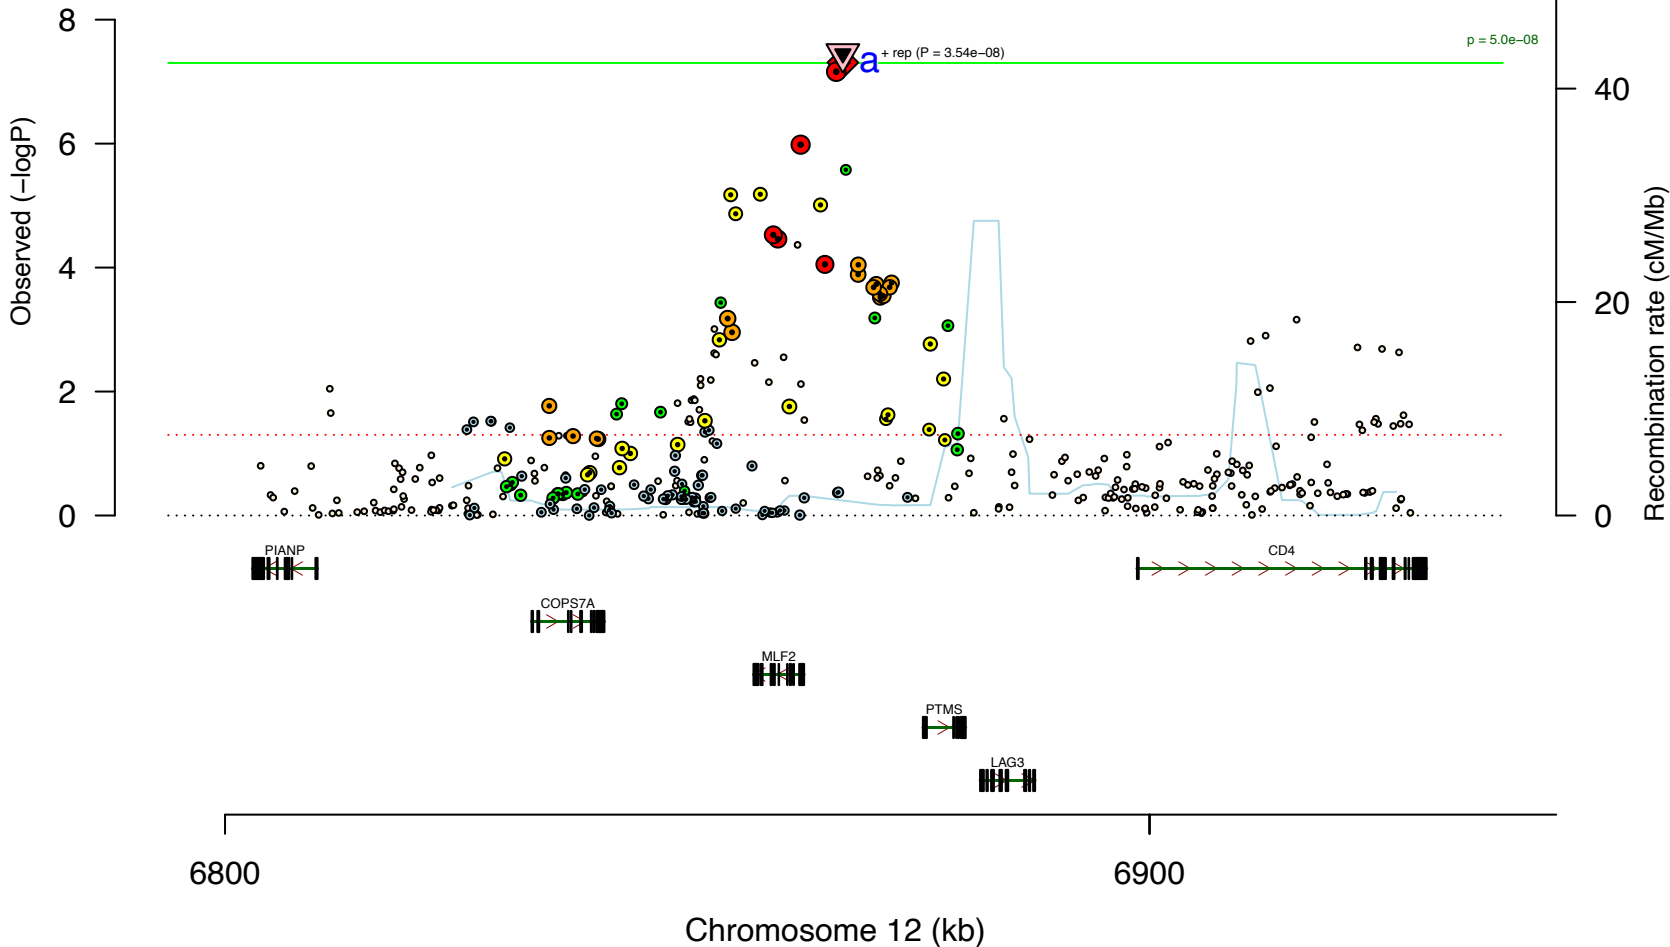

# PGC\_SCZ\_w3\_90\_0418b.267.chr9



snp / p / or / maf / info / directions  
 a . rs72761691 / 2.56e-08 / 1.06 / 0.14 / 0.922 / 1-2-0

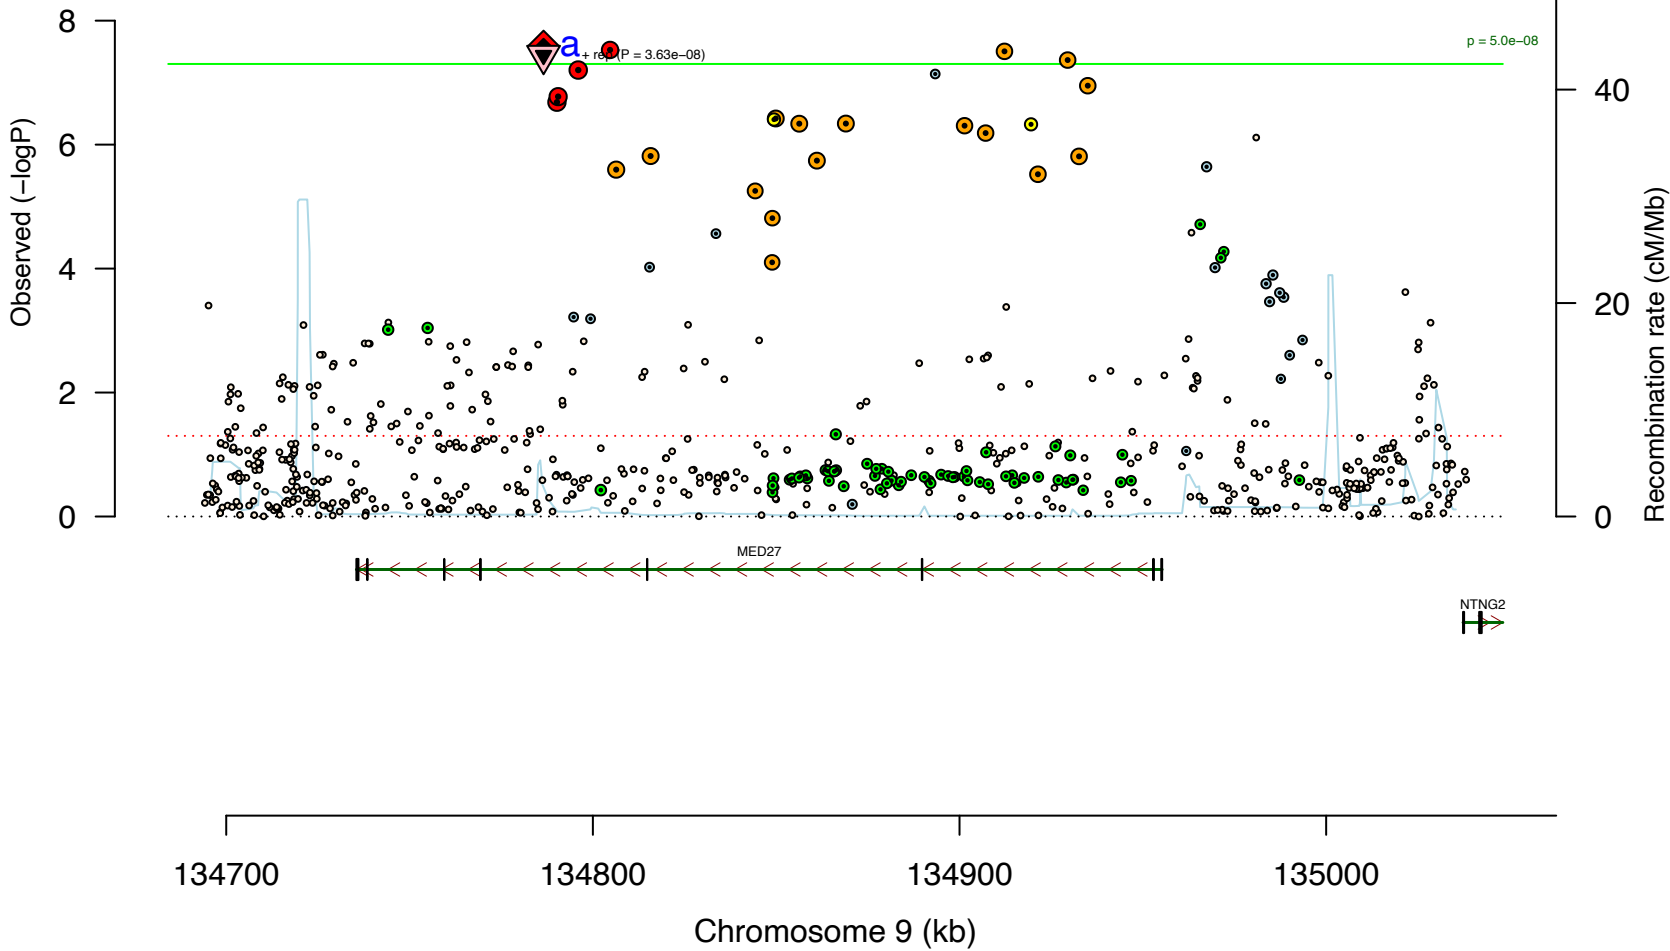

# PGC\_SCZ\_w3\_90\_0418b.268.chr4



snp / p / or / maf / info / directions  
a . rs7681616 / 2.70e-08 / 0.95 / 0.23 / 0.987 / 0-3-0

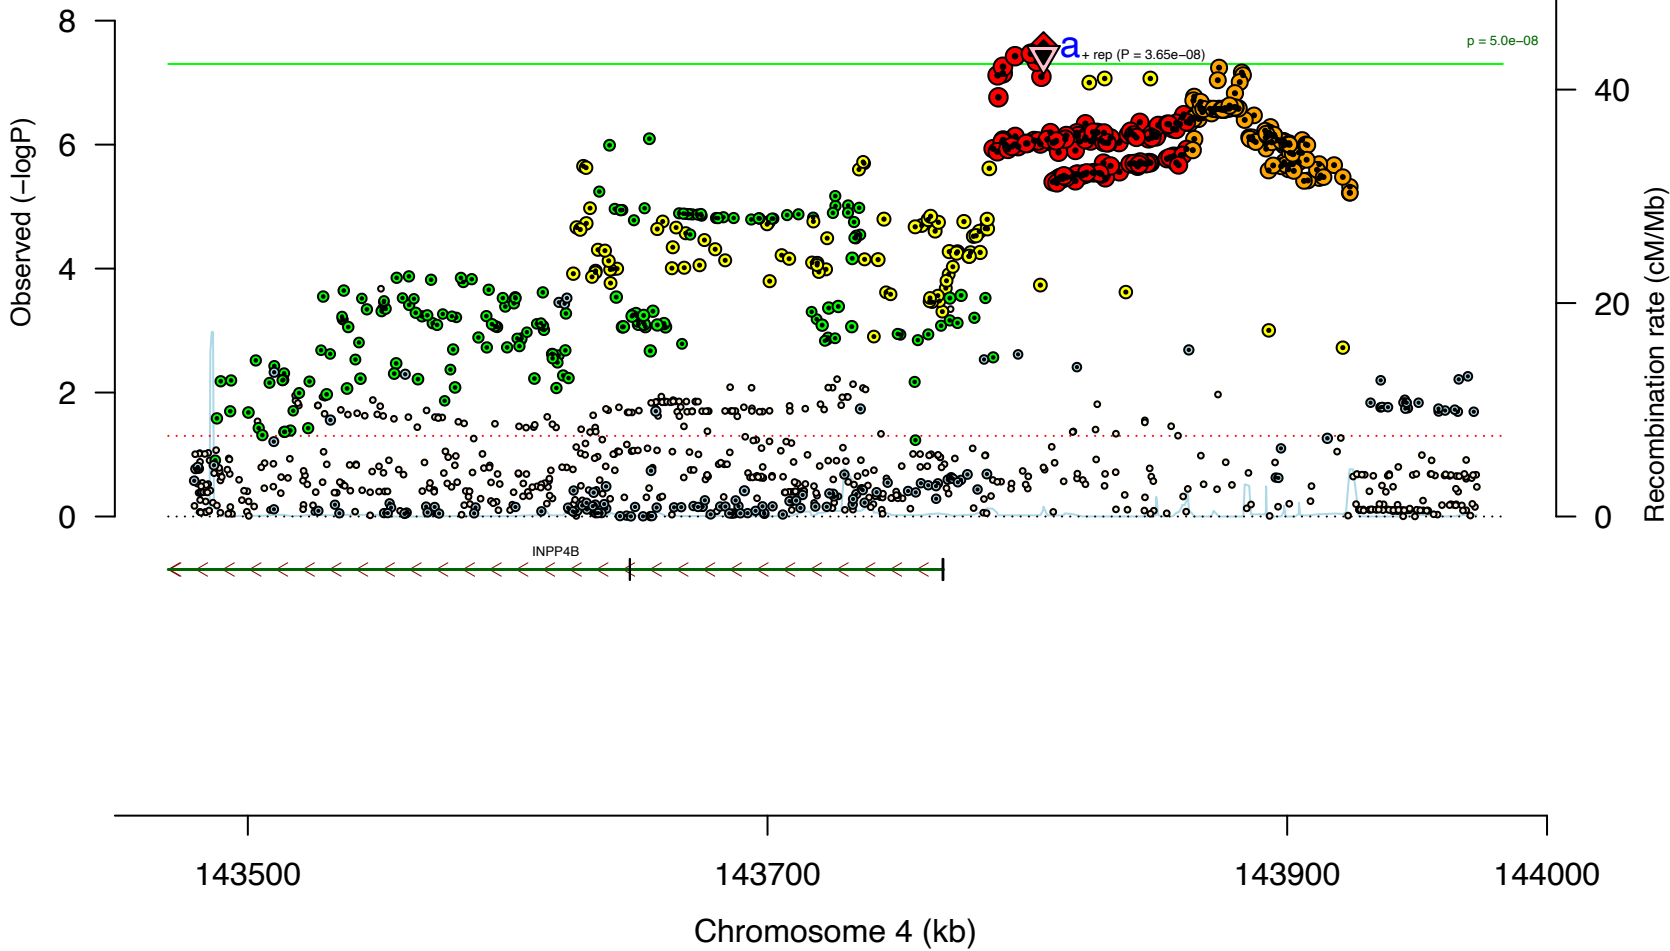

# PGC\_SCZ\_w3\_90\_0418b.269.chr7



snp / p / or / maf / info / directions  
a . rs12671608 / 4.44e-08 / 1.06 / 0.13 / 0.932 / 0-3-0

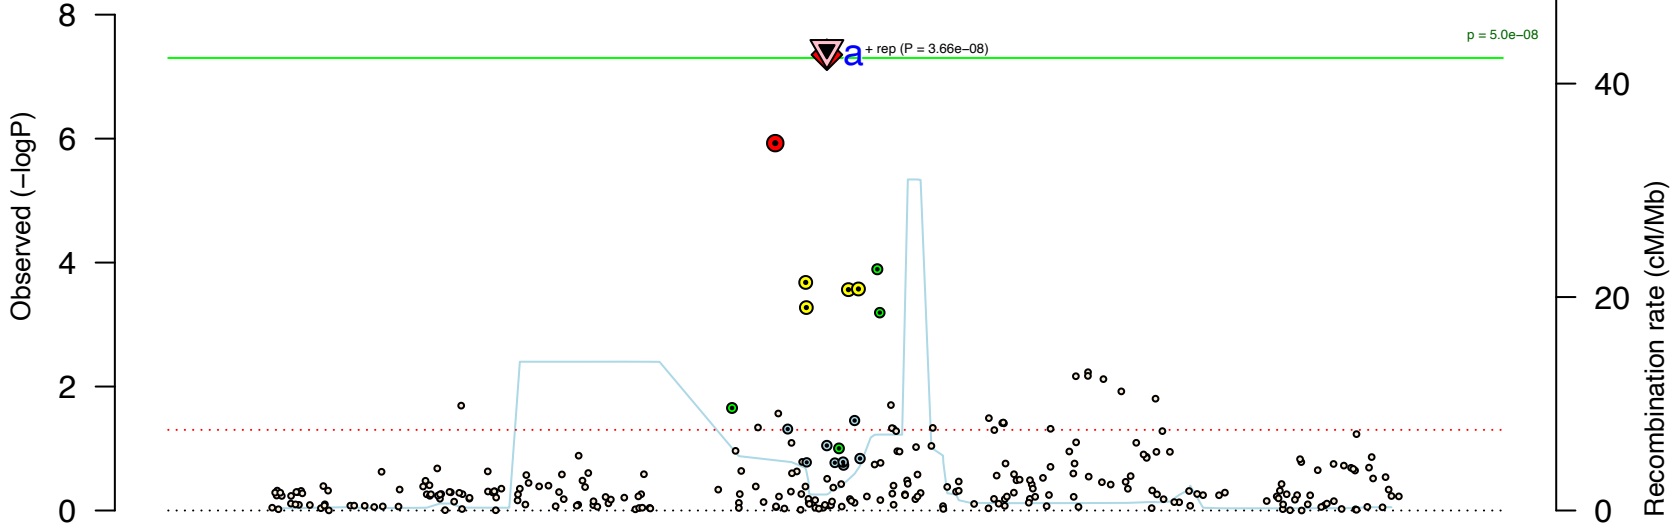

153500

Chromosome 7 (kb)



# PGC\_SCZ\_w3\_90\_0418b.270.chr11

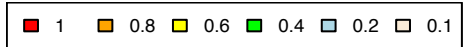

snp / p / or / maf / info / directions

a . rs4923457 / 9.58e-08 / 0.95 / 0.24 / 0.995 / 2-1-0

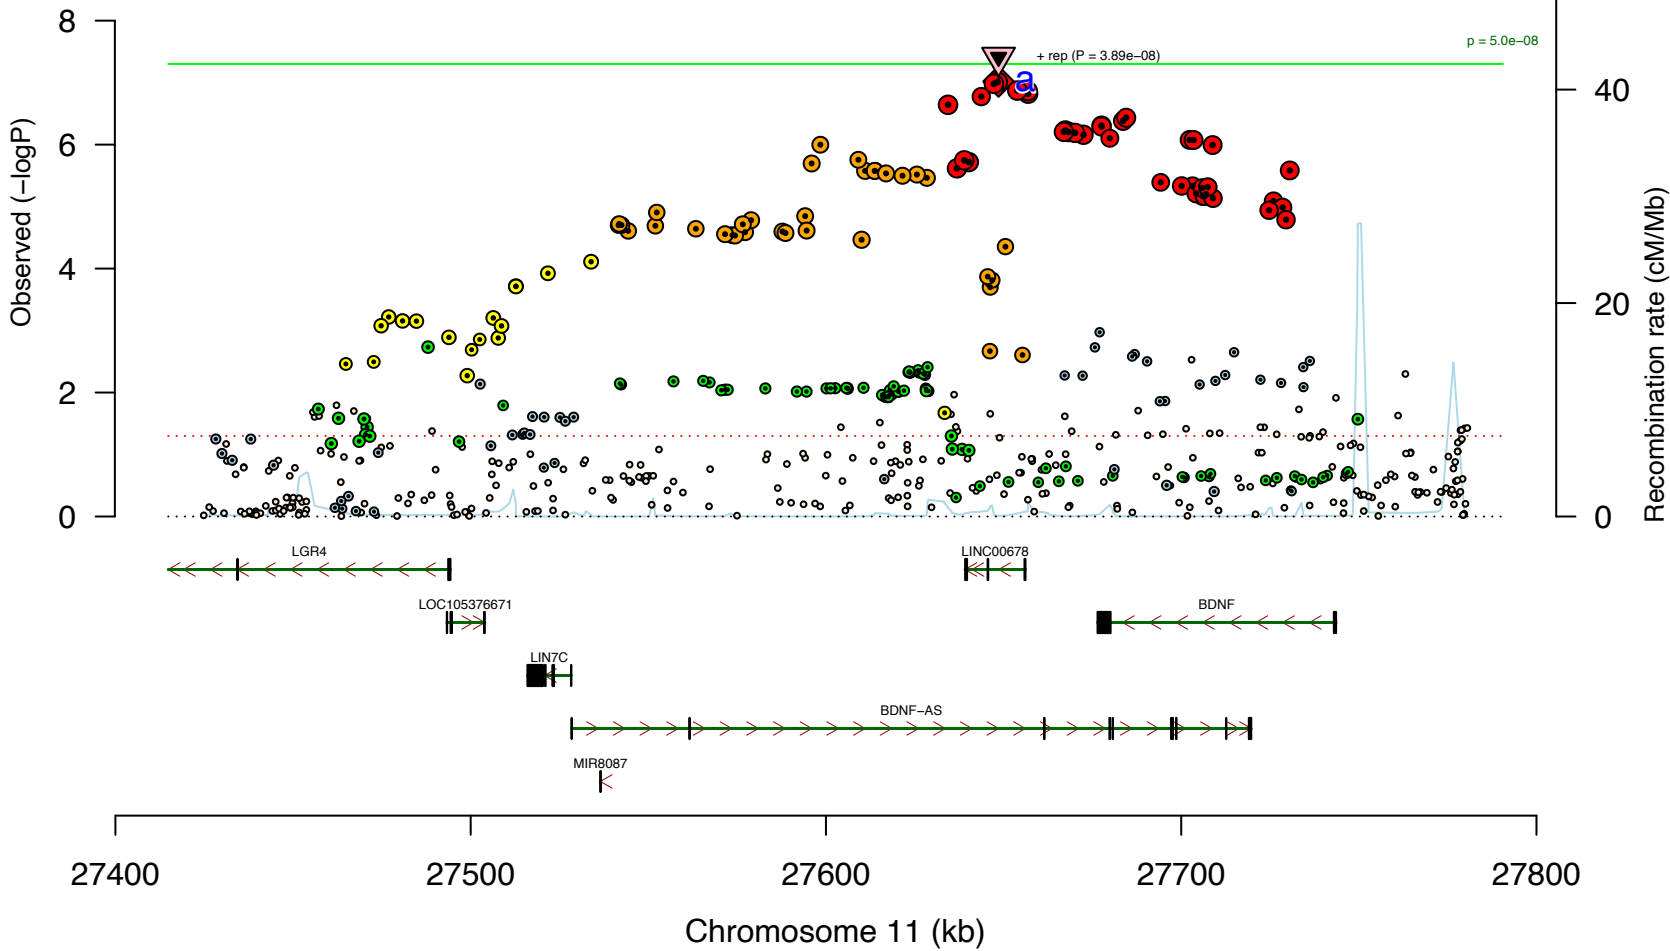

# PGC\_SCZ\_w3\_90\_0418b.271.chr9

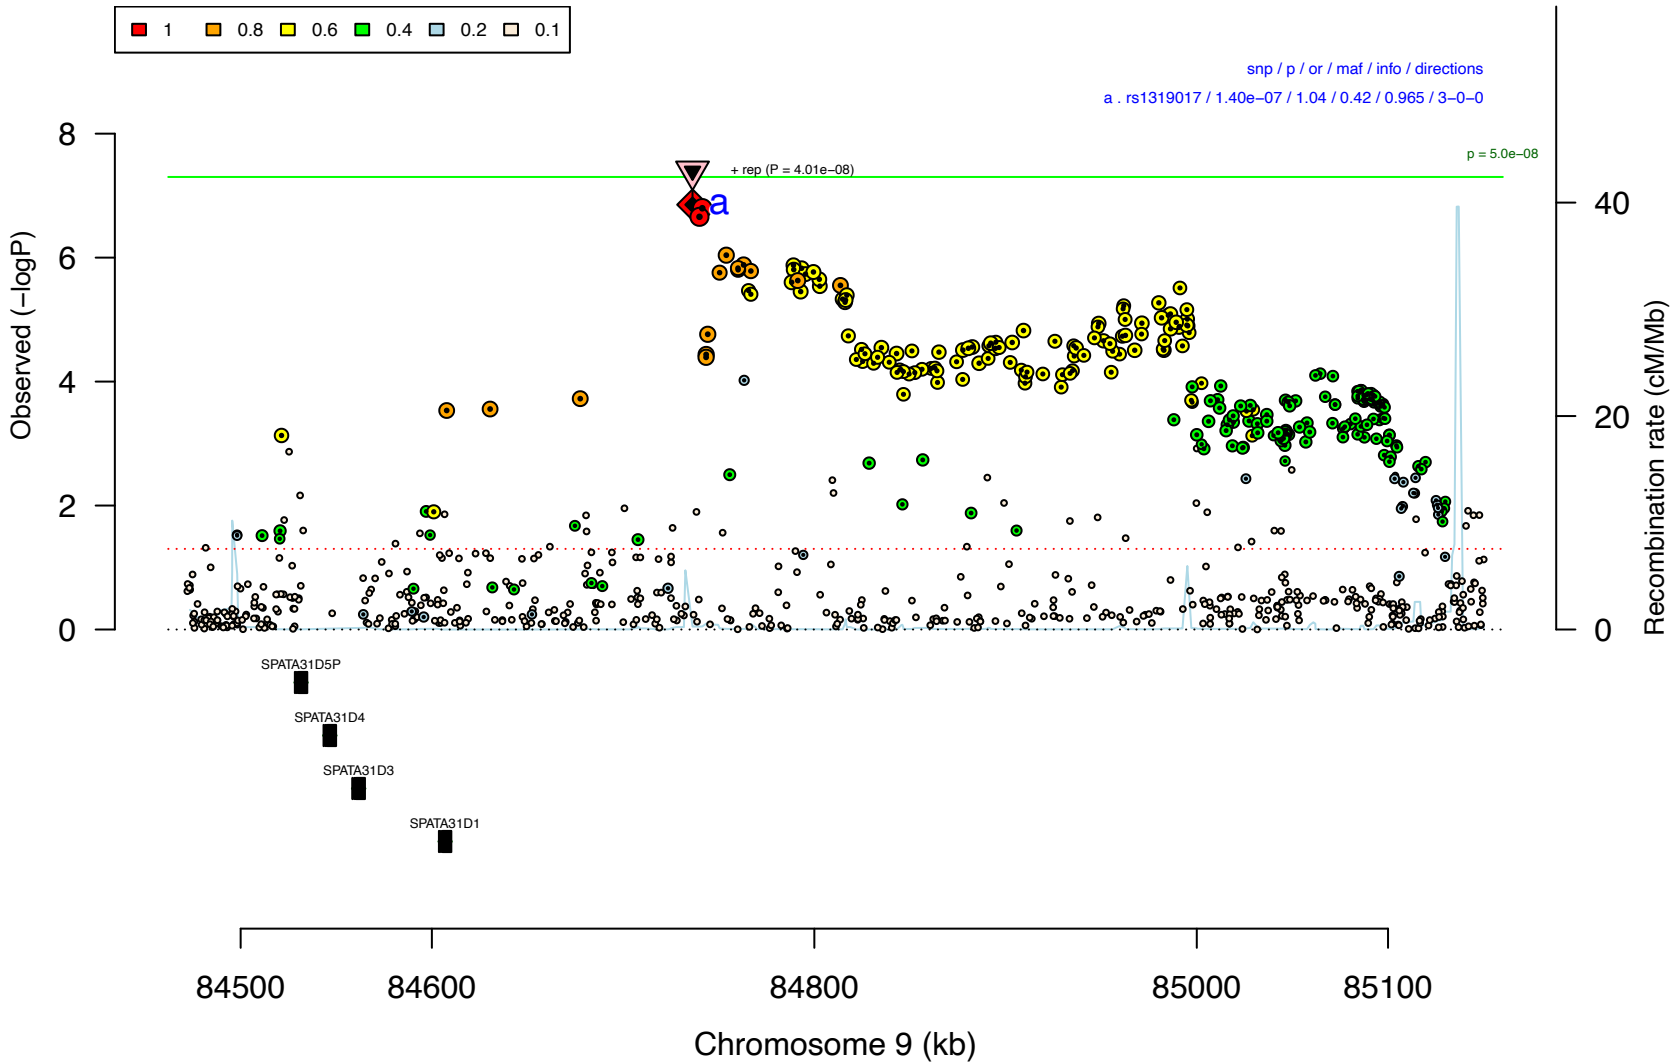

# PGC\_SCZ\_w3\_90\_0418b.272.chr2



snp / p / or / maf / info / directions  
a . rs11685270 / 5.94e-08 / 1.04 / 0.49 / 0.994 / 2-1-0

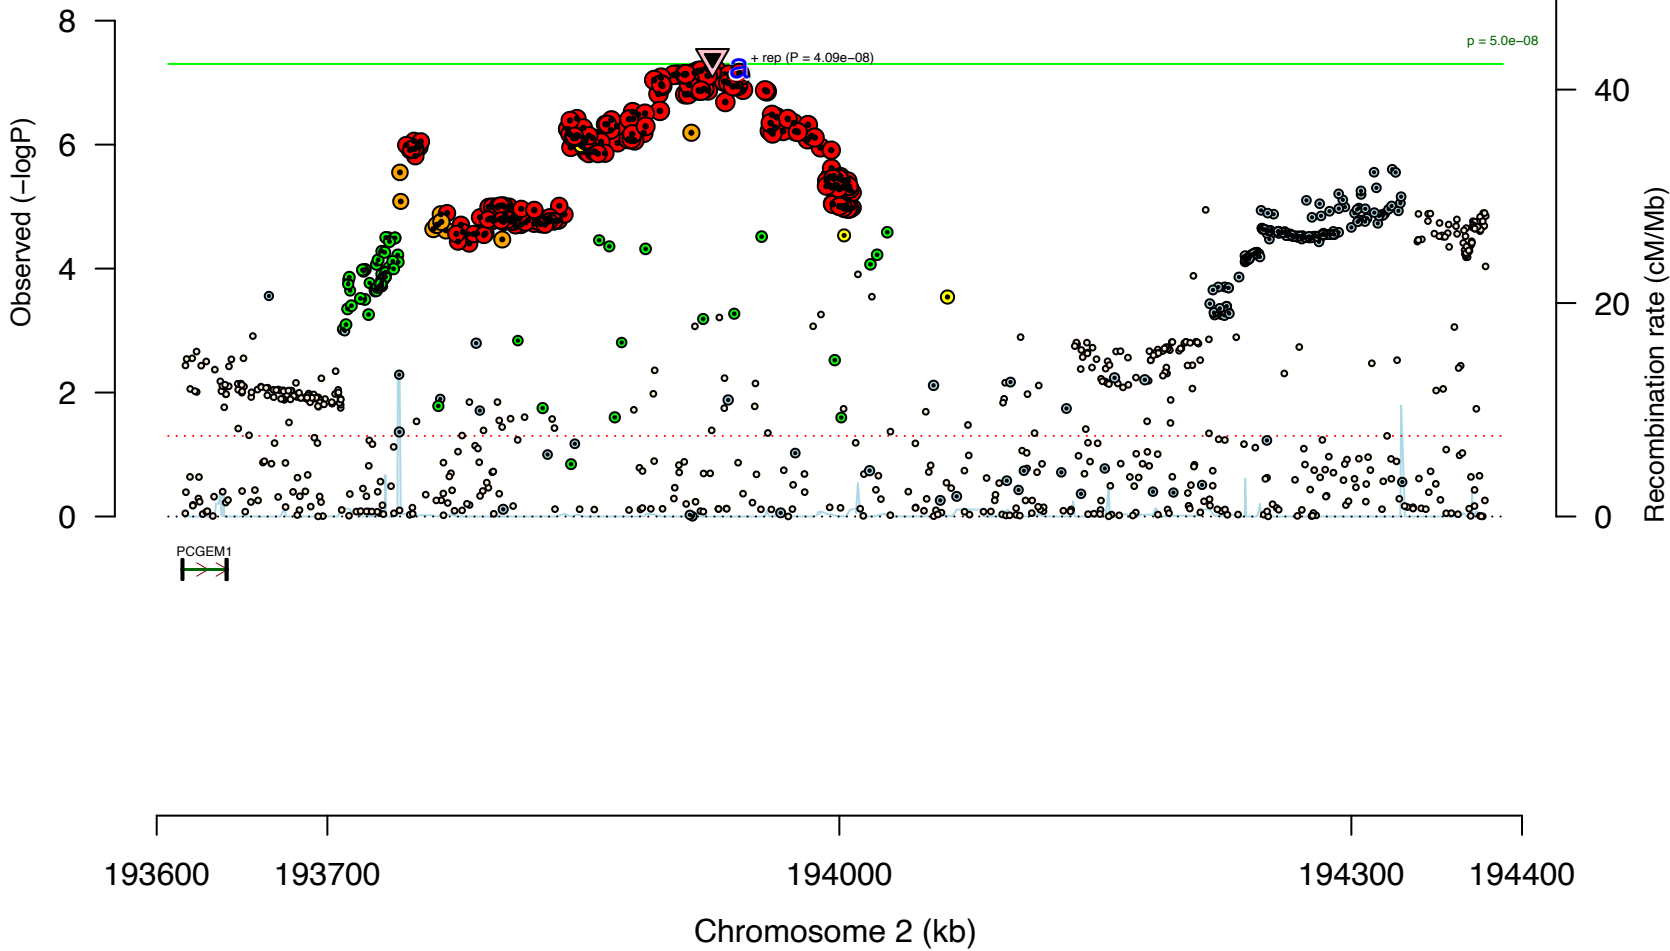

# PGC\_SCZ\_w3\_90\_0418b.273.chr2

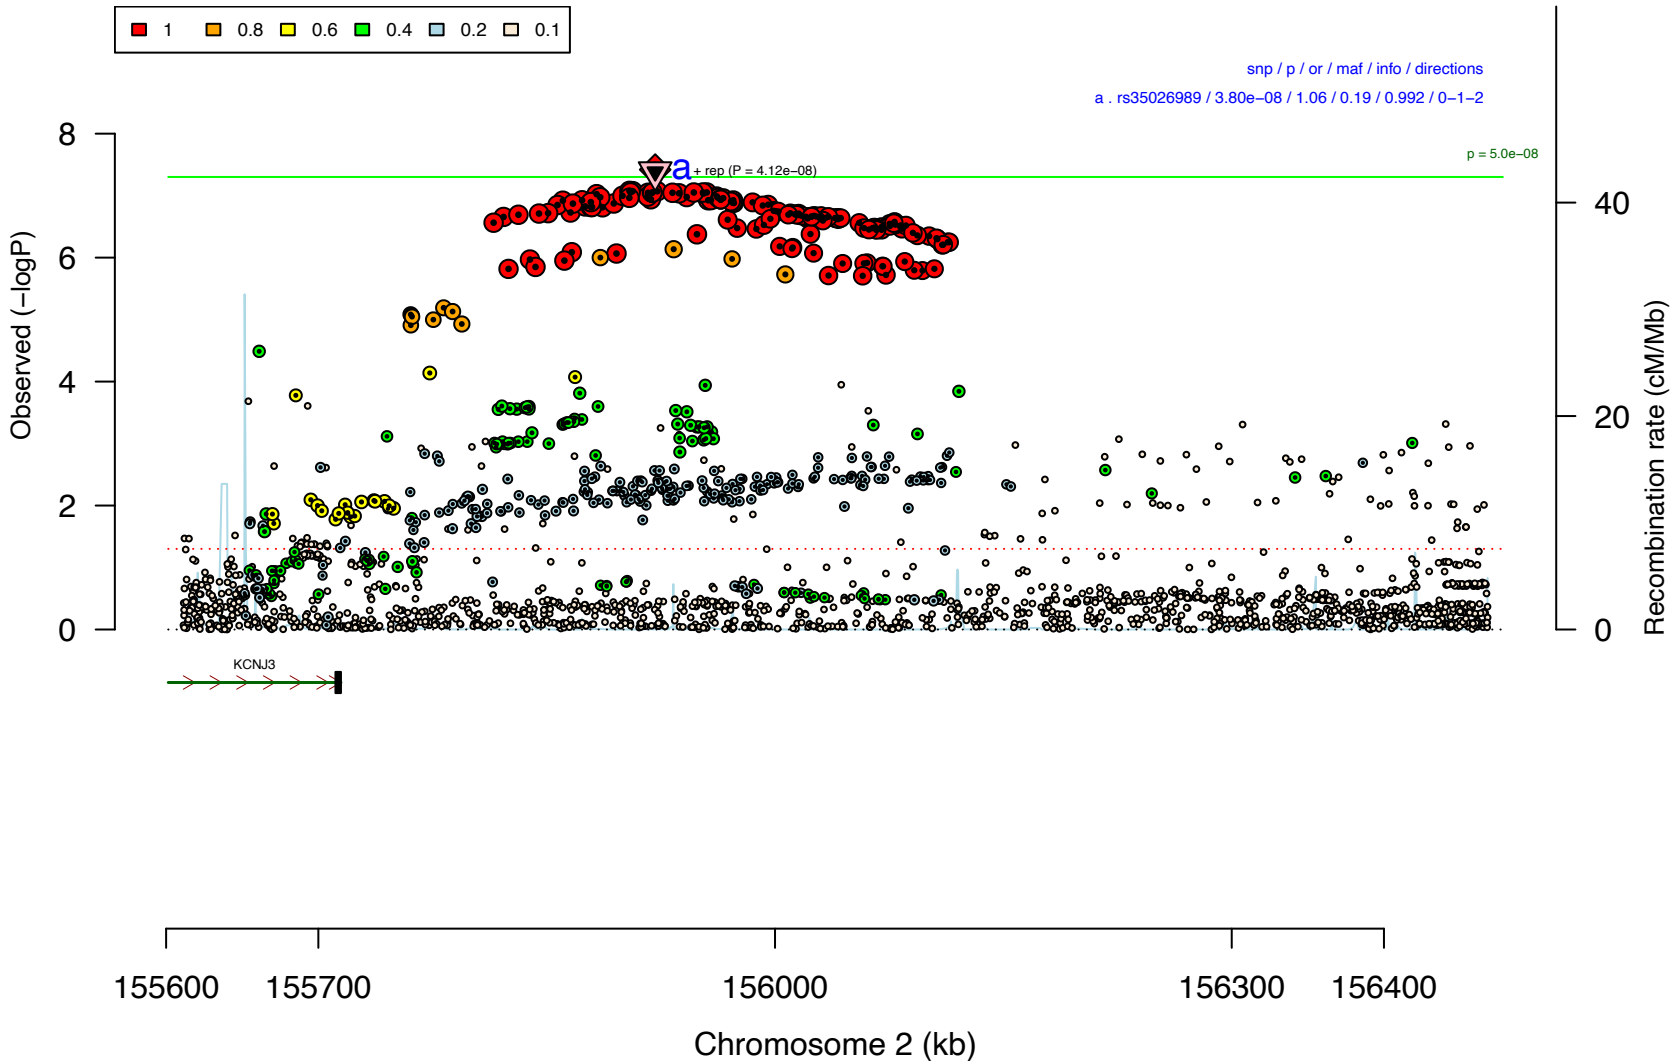

# PGC\_SCZ\_w3\_90\_0418b.274.chr1

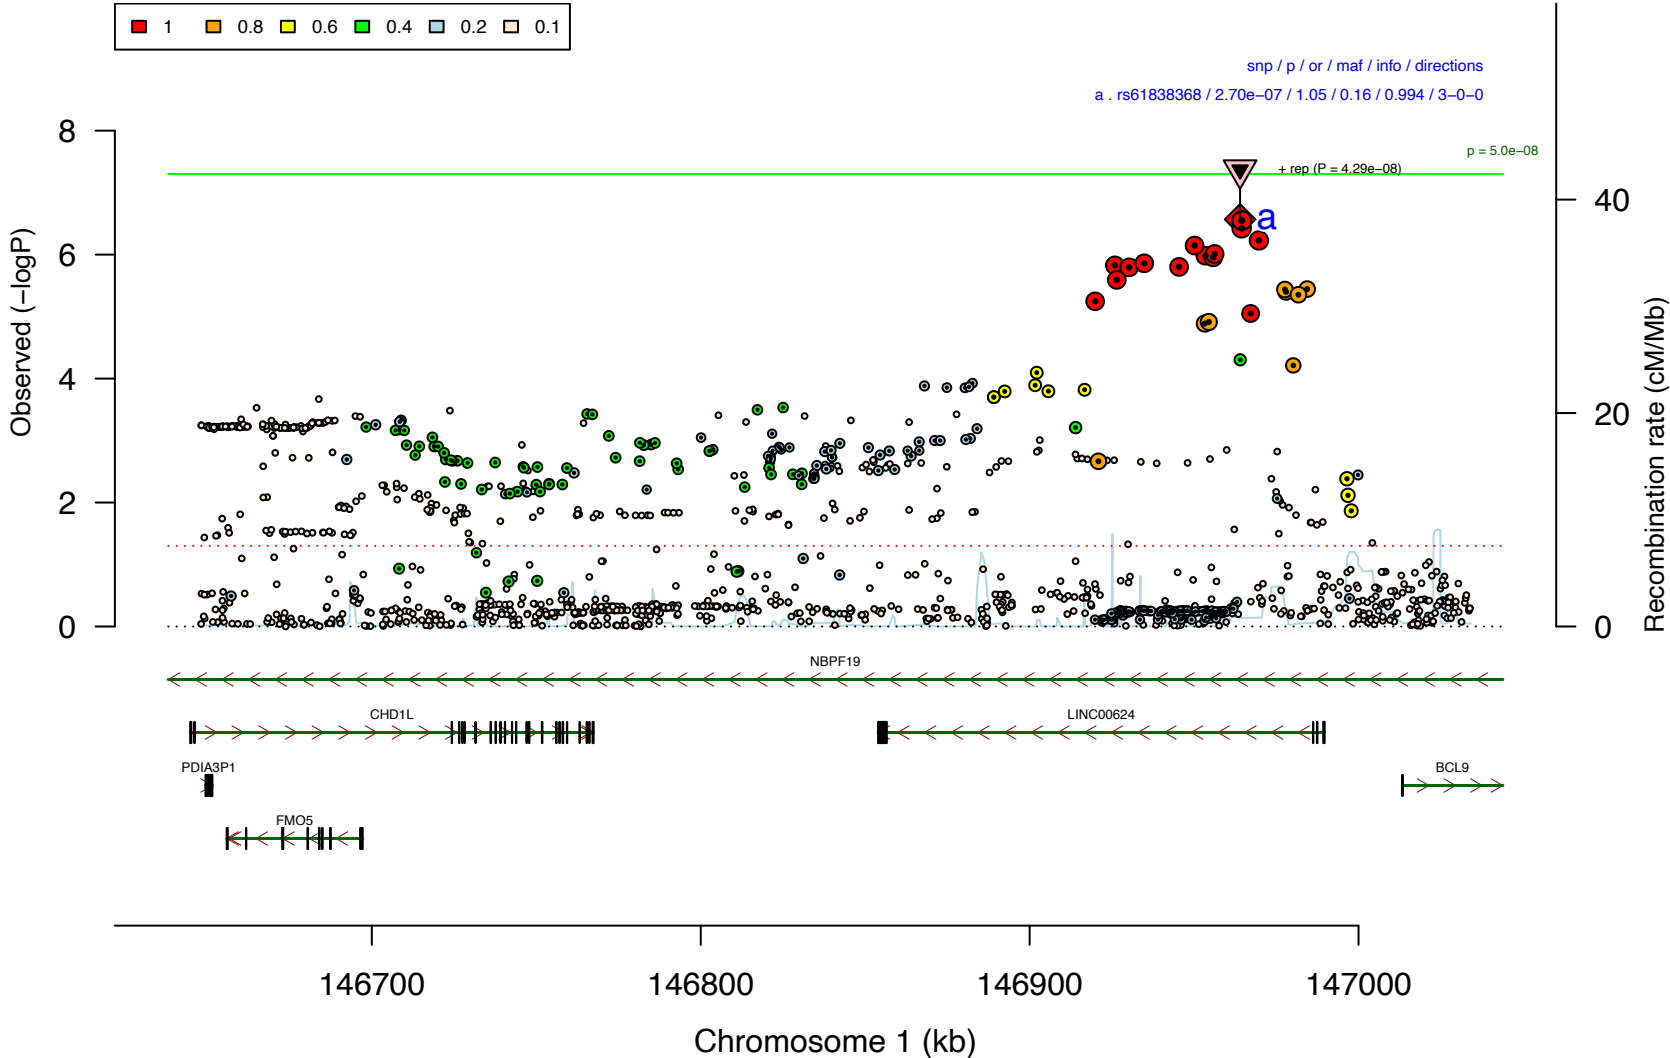

# PGC\_SCZ\_w3\_90\_0418b.275.chr14

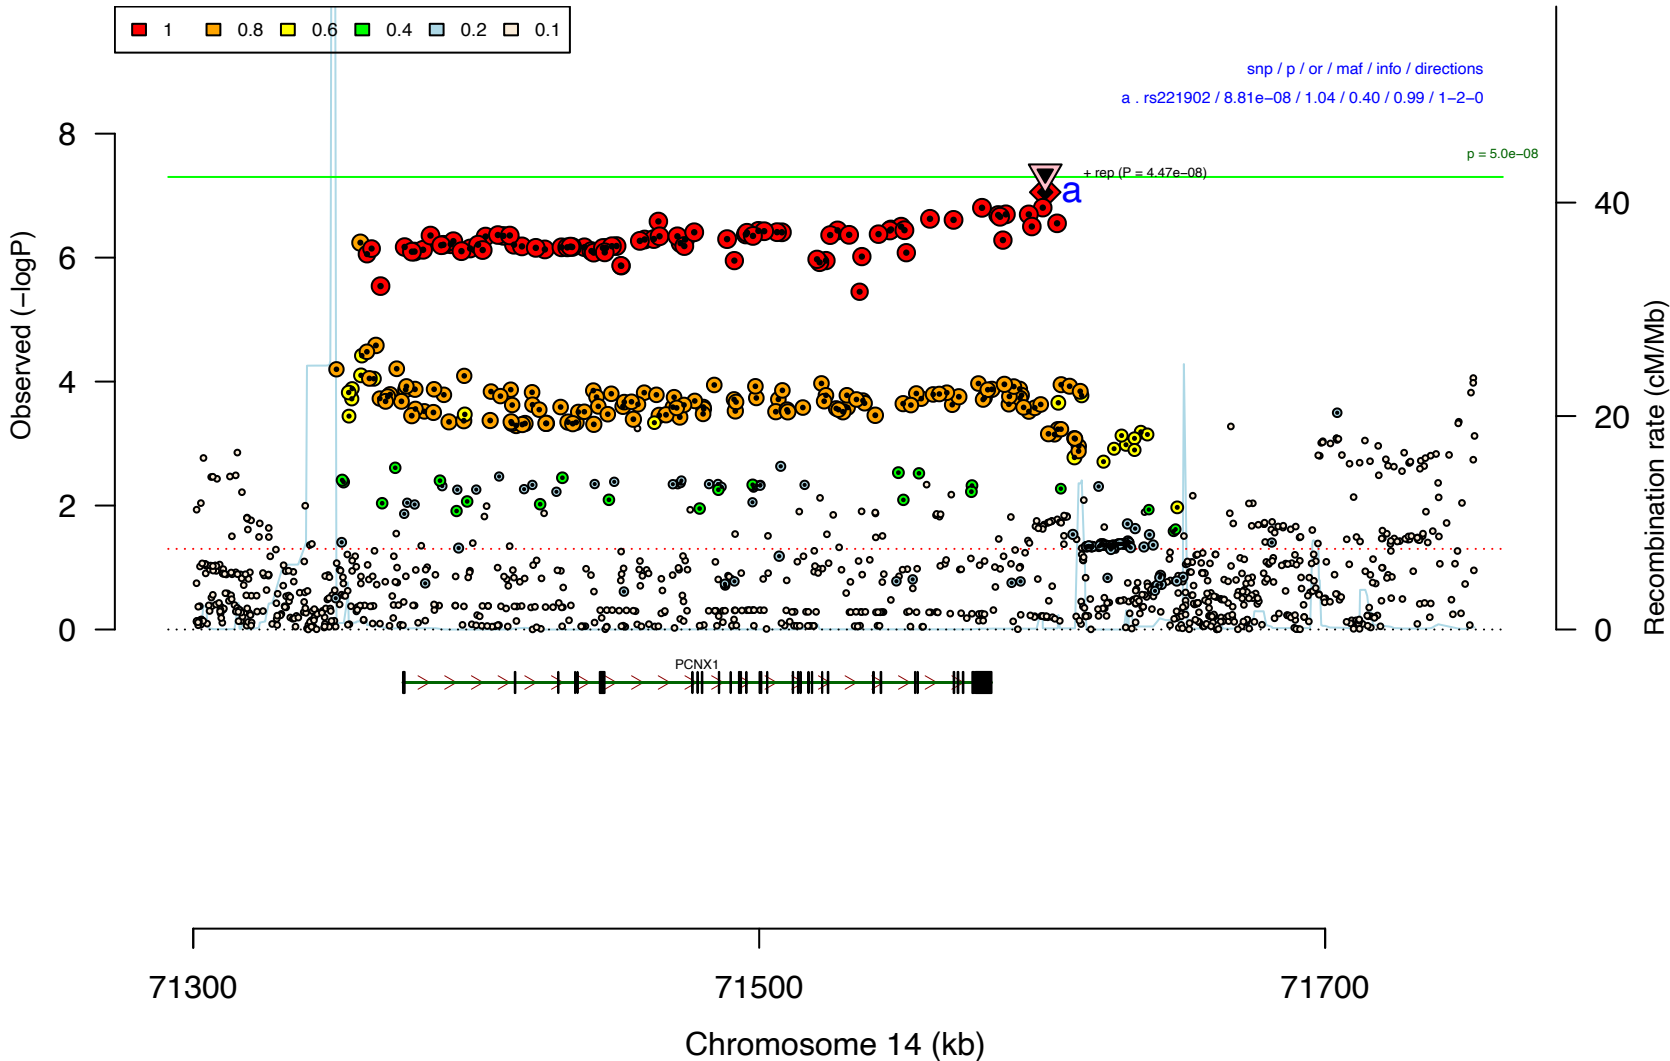

# PGC\_SCZ\_w3\_90\_0418b.276.chr22



snp / p / or / maf / info / directions

a . rs76365544 / 2.93e-07 / 0.84 / 0.02 / 0.801 / 0-1-2

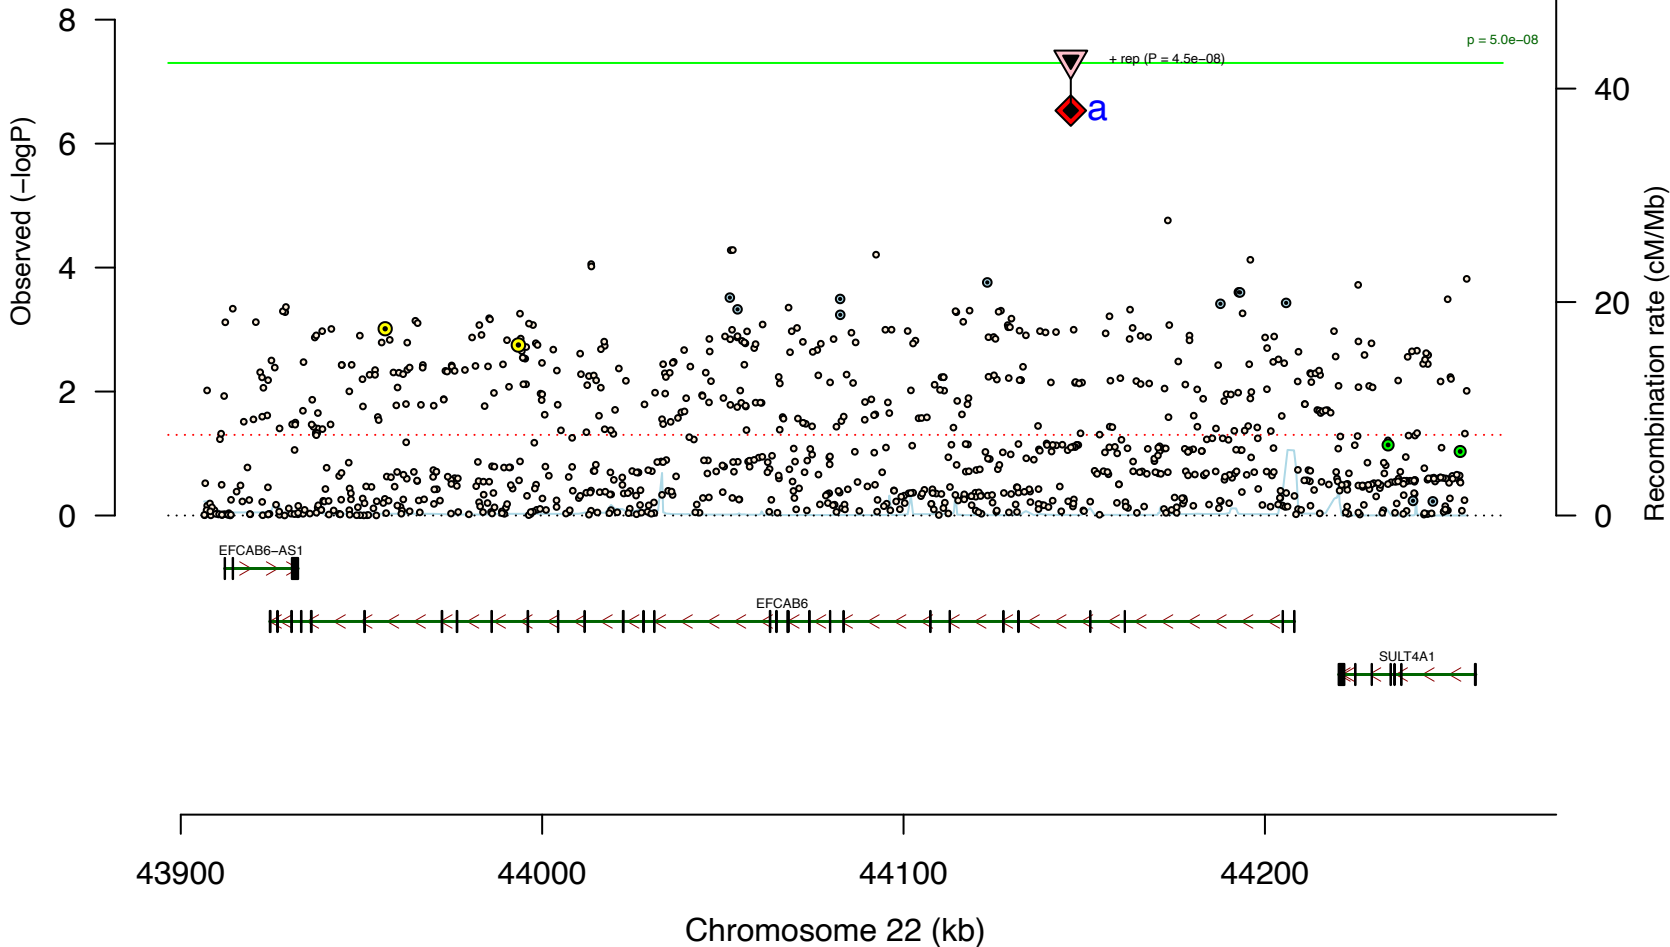

# PGC\_SCZ\_w3\_90\_0418b.277.chr17

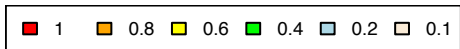

snp / p / or / maf / info / directions

a . rs2189336 / 1.34e-06 / 1.04 / 0.41 / 0.977 / 1-2-0

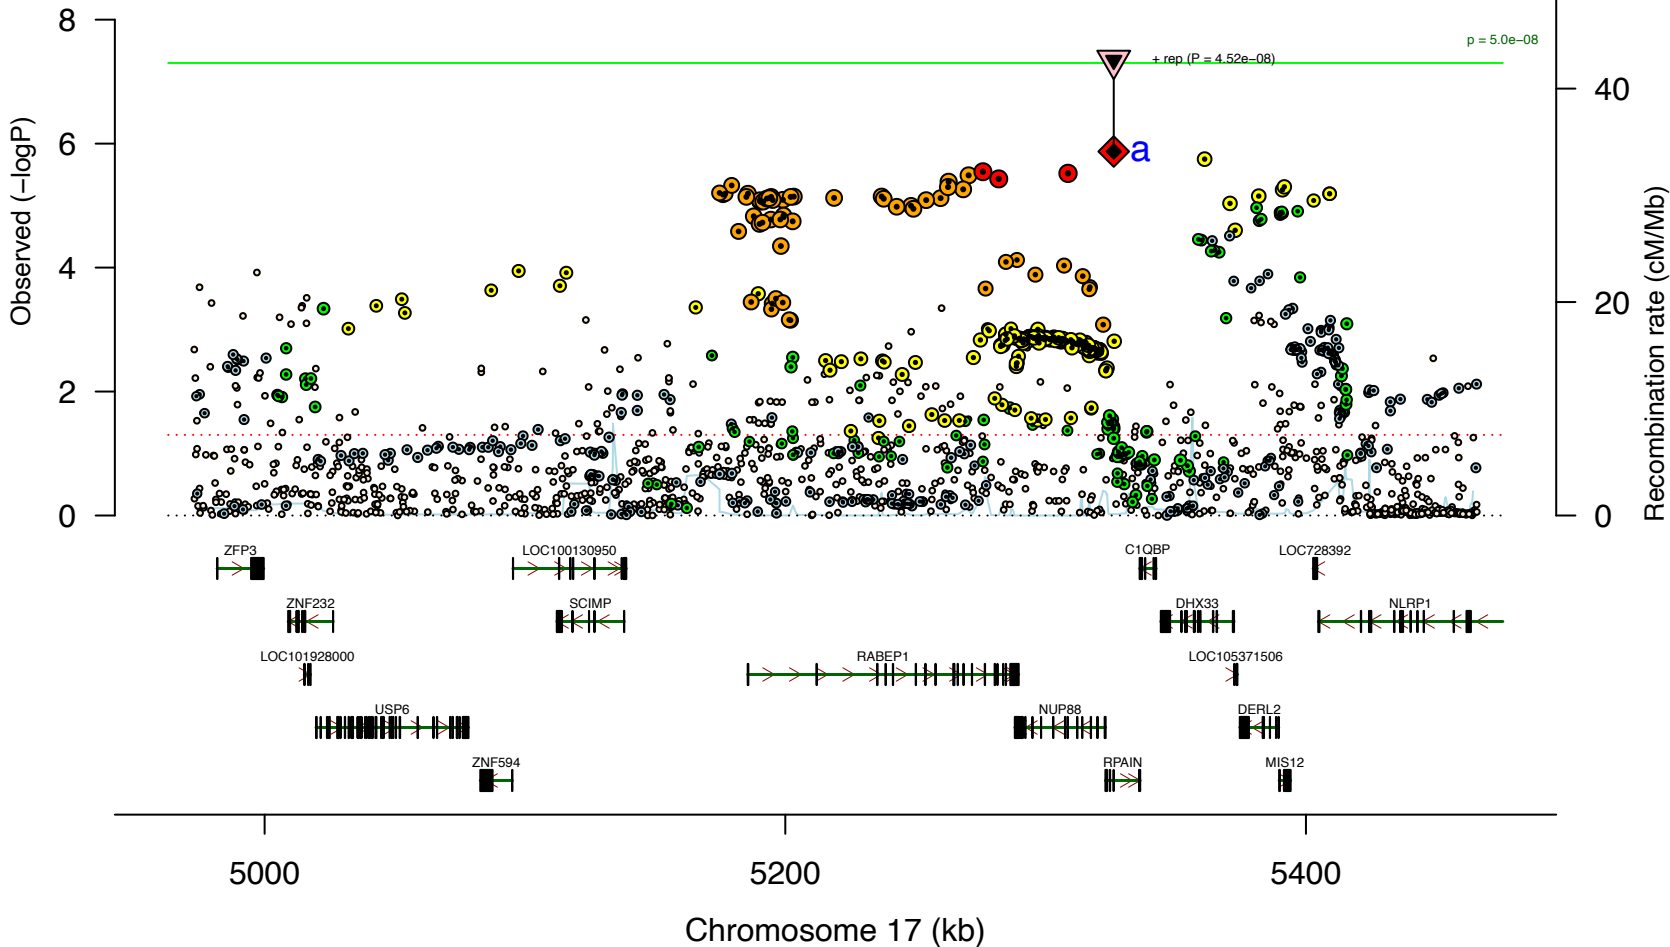



# PGC\_SCZ\_w3\_90\_0418b.278.chr3



snp / p / or / maf / info / directions  
a . rs77174383 / 9.50e-08 / 1.06 / 0.12 / 0.984 / 0-3-0

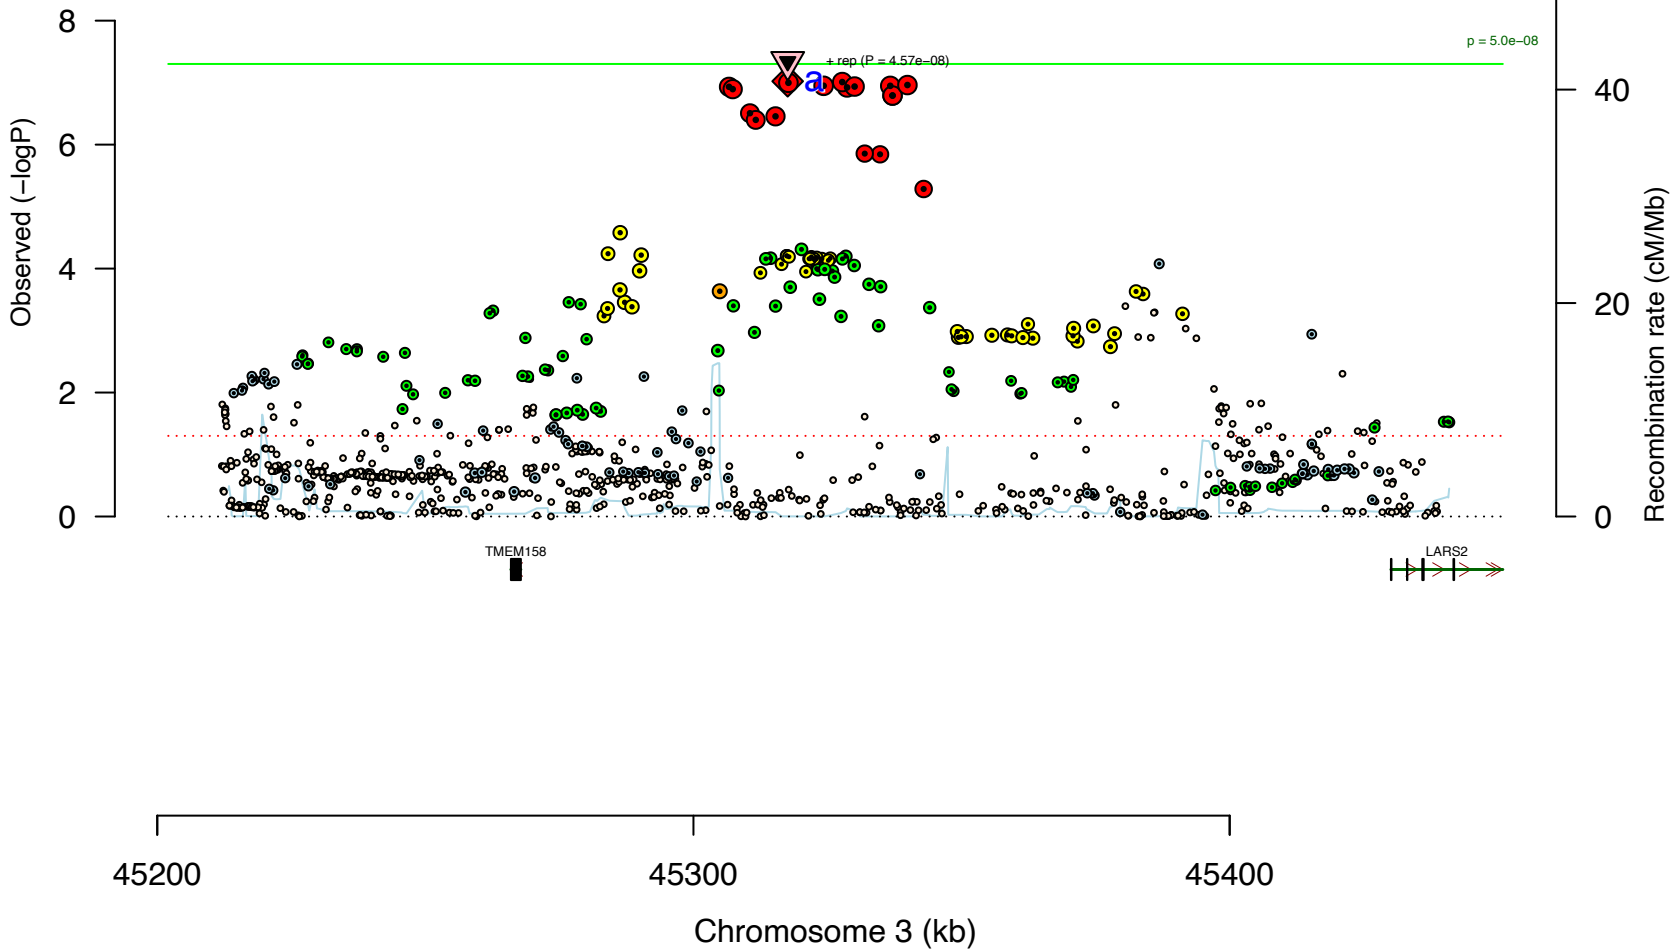

# PGC\_SCZ\_w3\_90\_0418b.279.chr4



snp / p / or / maf / info / directions  
a . rs982012 / 1.94e-07 / 0.96 / 0.37 / 0.982 / 3-0-0

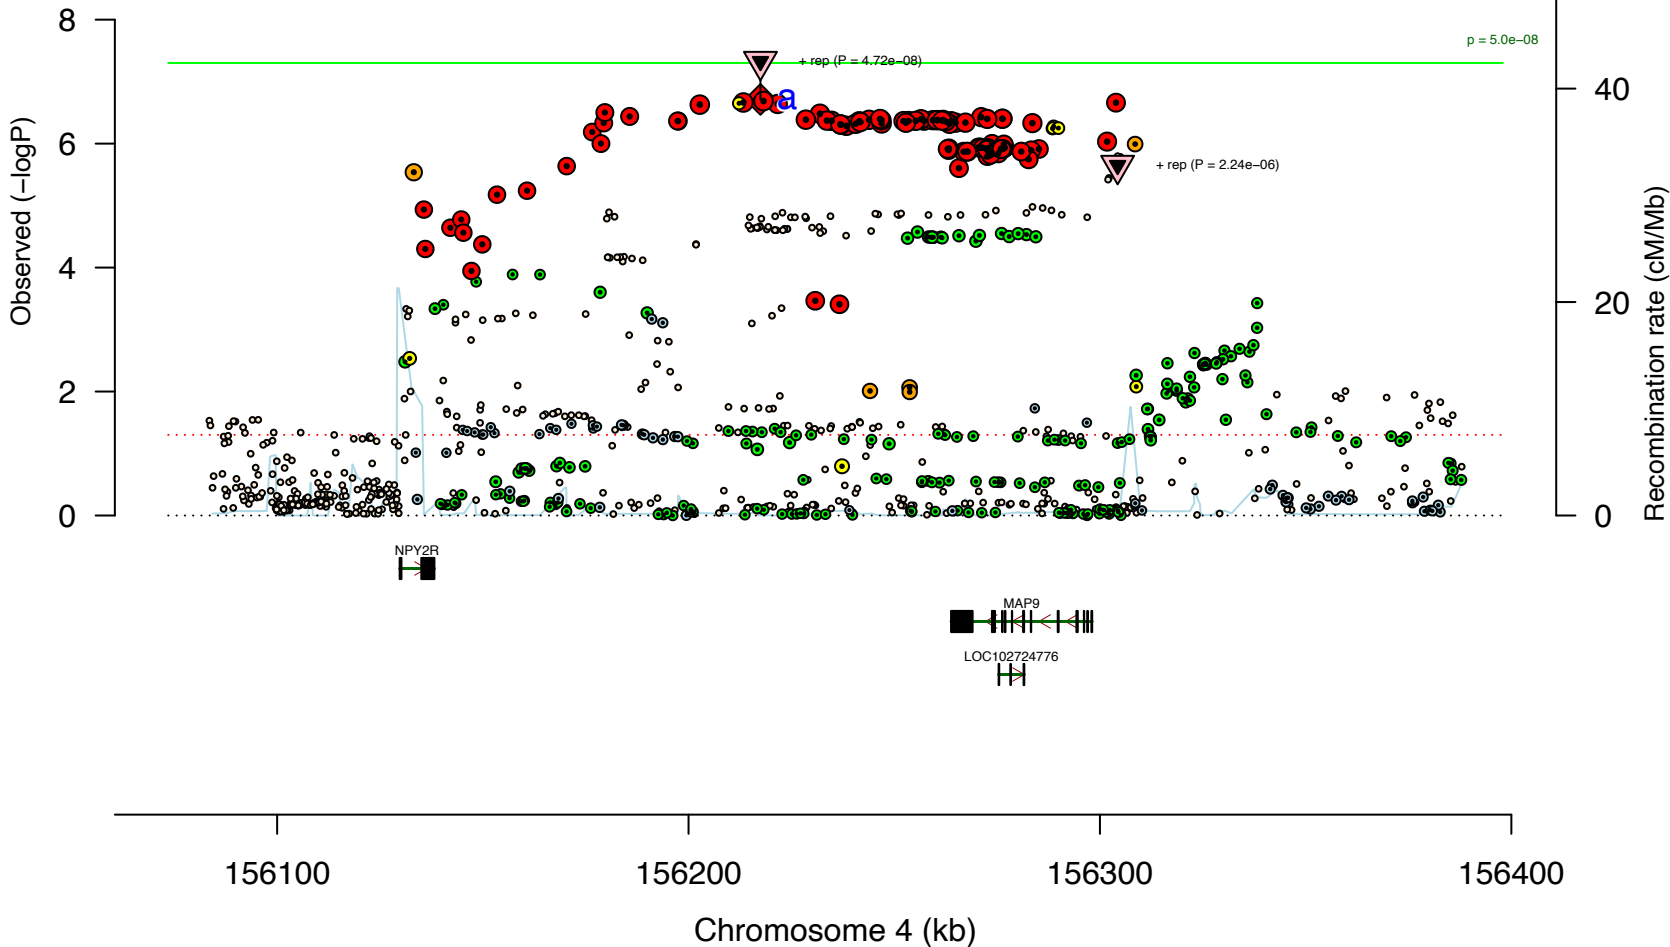

# PGC\_SCZ\_w3\_90\_0418b.280.chr7



snp / p / or / maf / info / directions  
a . rs3923569 / 6.13e-08 / 0.96 / 0.32 / 0.995 / 1-2-0

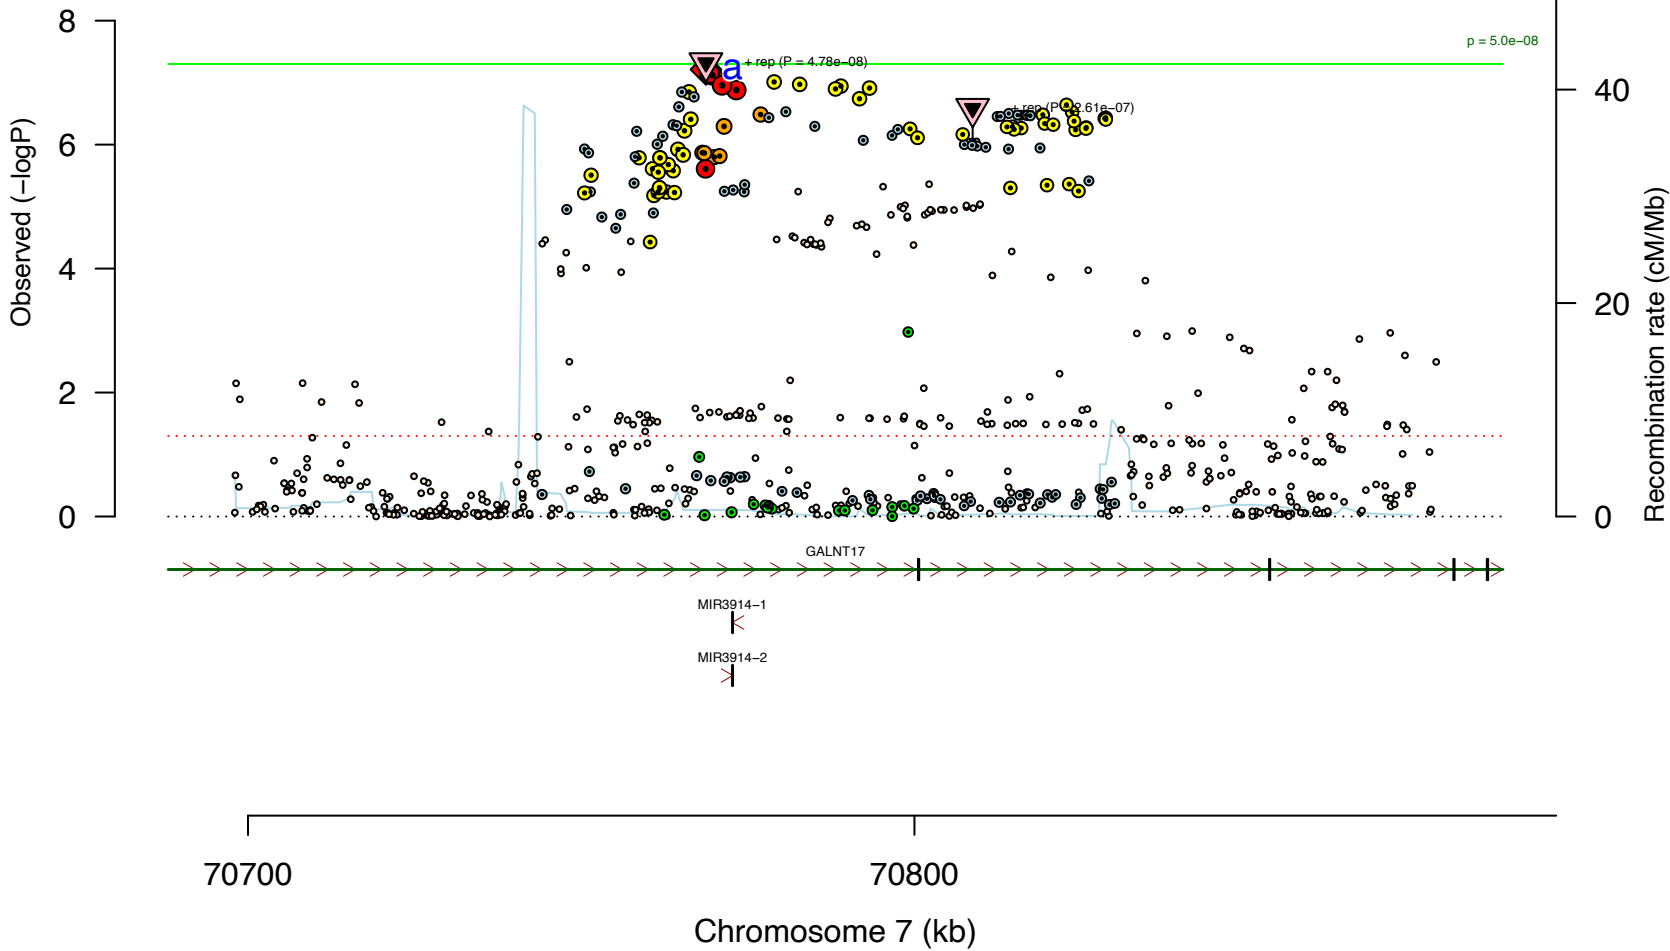

# PGC\_SCZ\_w3\_90\_0418b.281.chr17



snp / p / or / maf / info / directions

a . rs7225476 / 6.49e-07 / 0.96 / 0.46 / 0.994 / 3-0-0

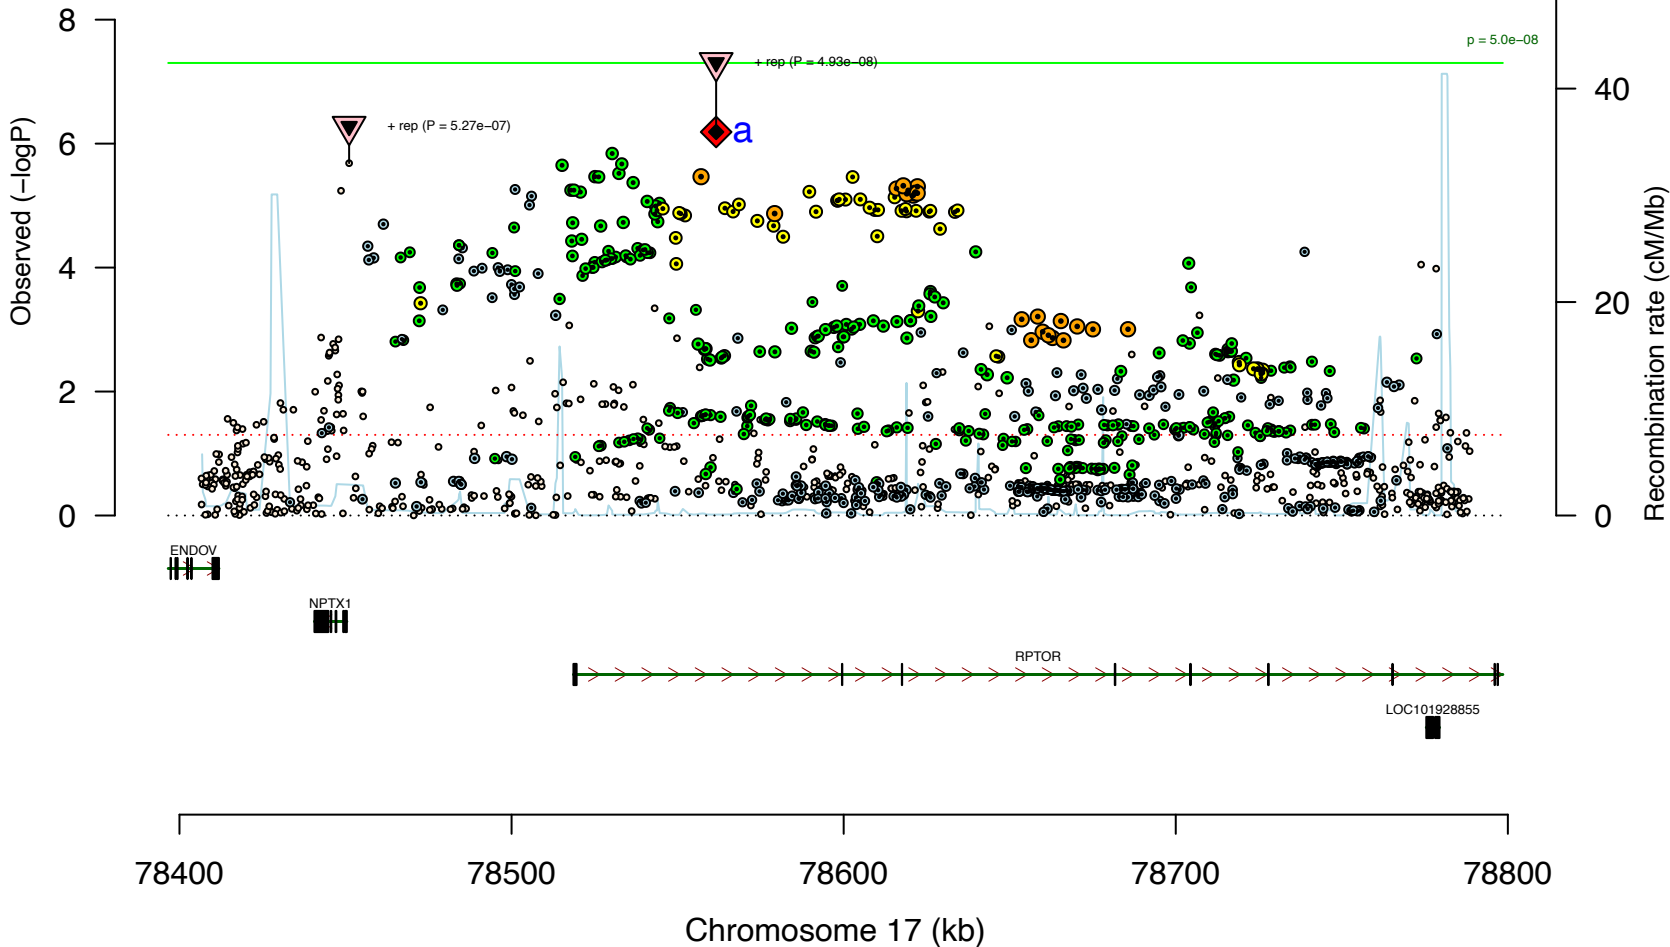

# PGC\_SCZ\_w3\_90\_0418b.282.chr12



snp / p / or / maf / info / directions  
a . rs10777341 / 1.18e-07 / 0.96 / 0.39 / 0.986 / 1-2-0

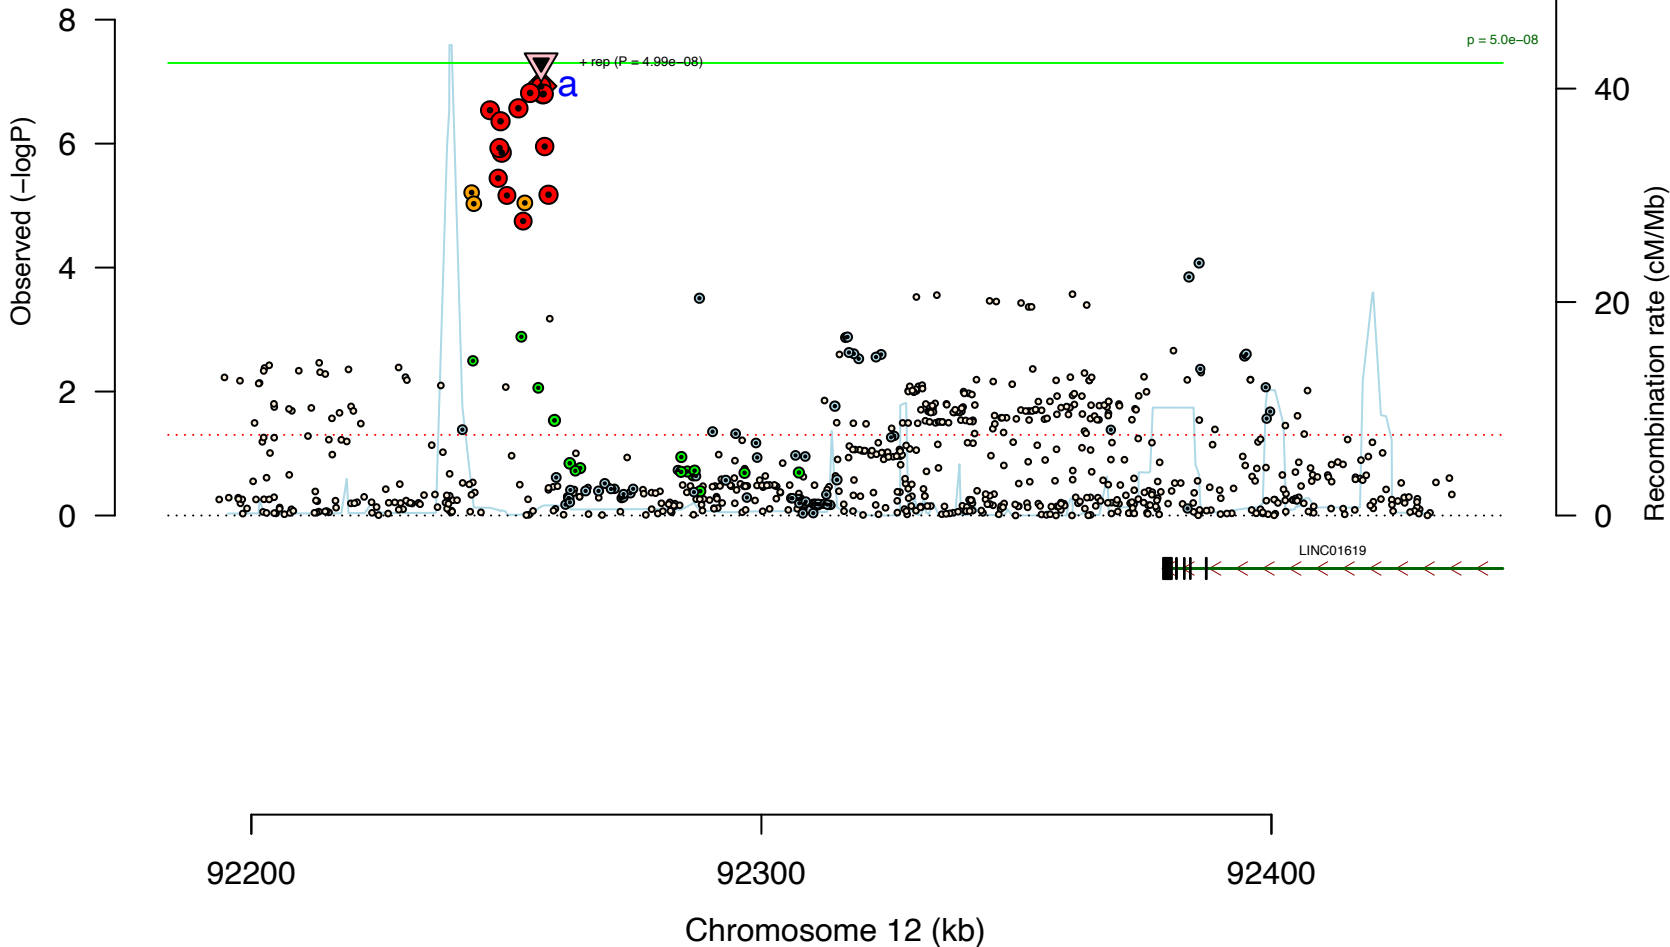

# PGC\_SCZ\_w3\_90\_0418b.283.chr5



snp / p / or / maf / info / directions  
a . rs12514660 / 2.01e-07 / 0.96 / 0.36 / 0.997 / 1-0-2

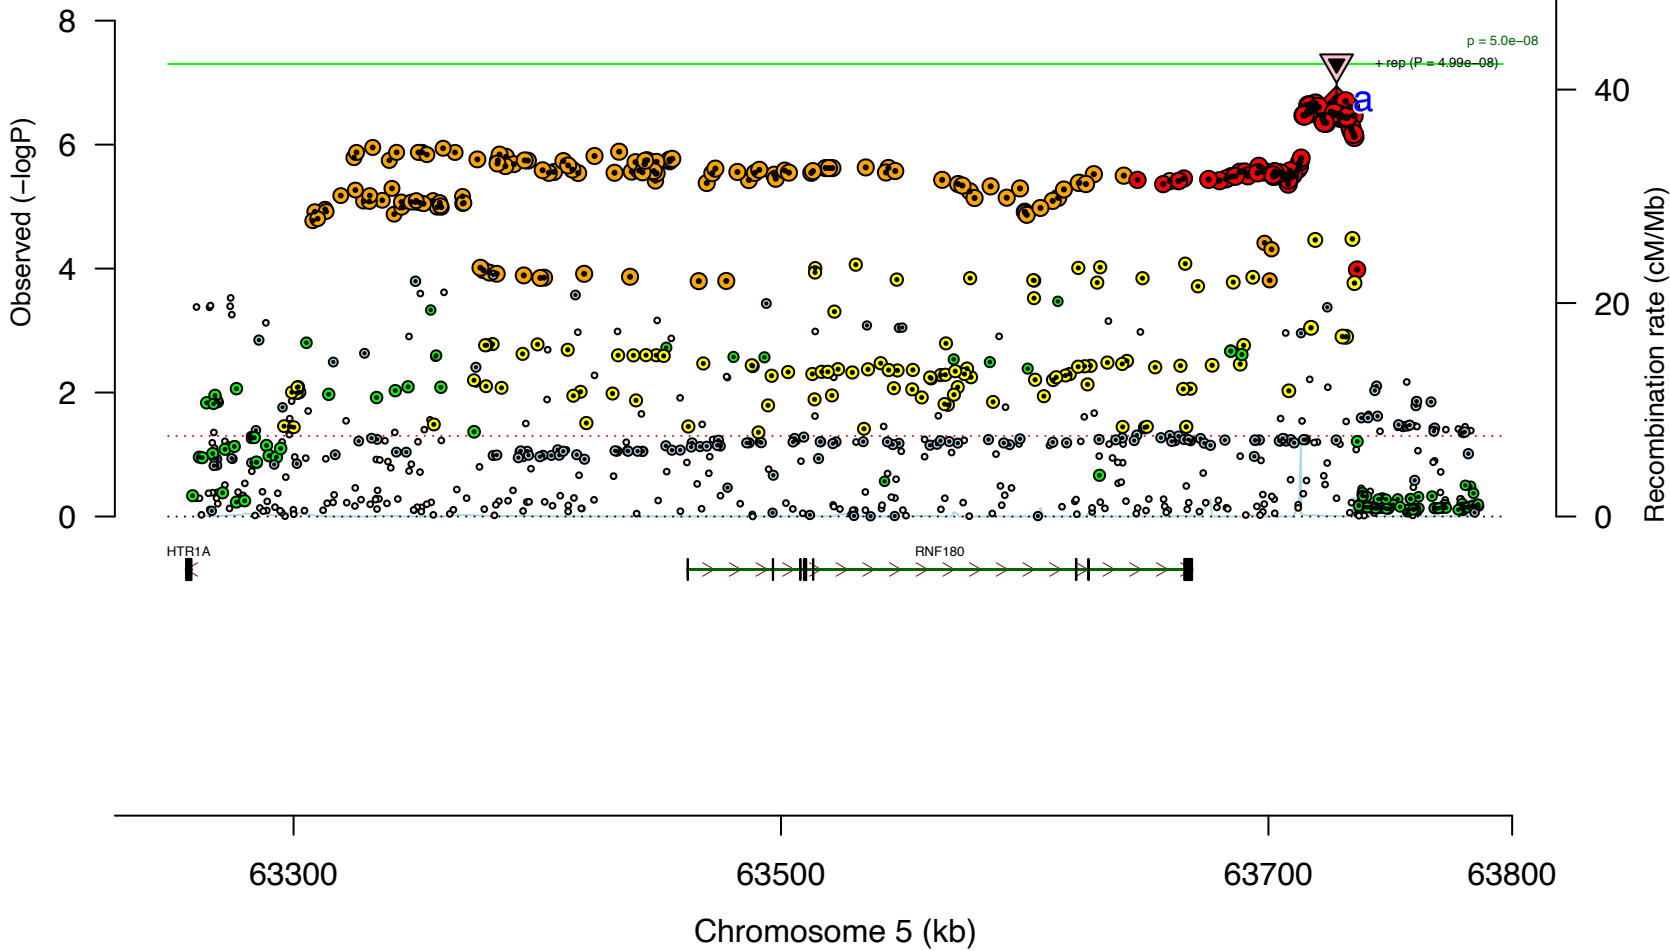

Supplement: NIHMS1824605-supplement-Figure_S1a.pdf [file NIHMS1824605-supplement-Figure_S1a.pdf]
