# Supplementary material
Source: PubMed Central journal article supplement (PMC9392466)

# scz\_w3\_HRC\_chrX\_deduped\_0618a.1.chr23

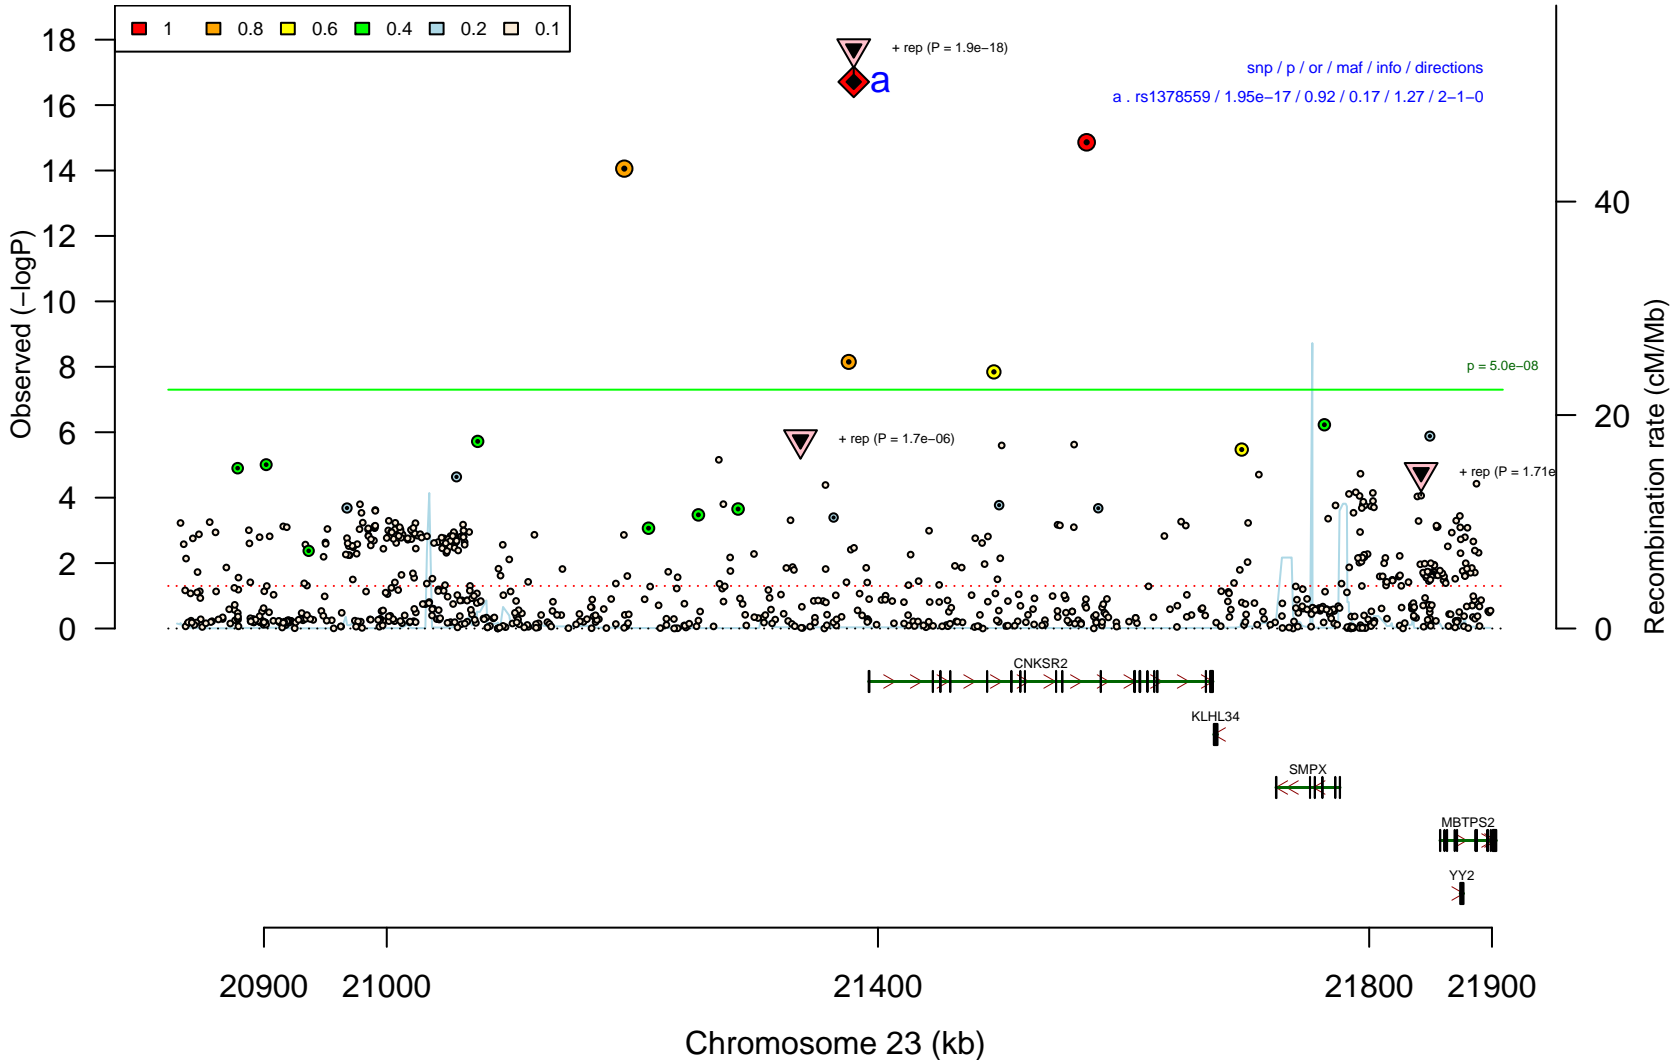

# scz\_w3\_HRC\_chrX\_deduped\_0618a.2.chr23

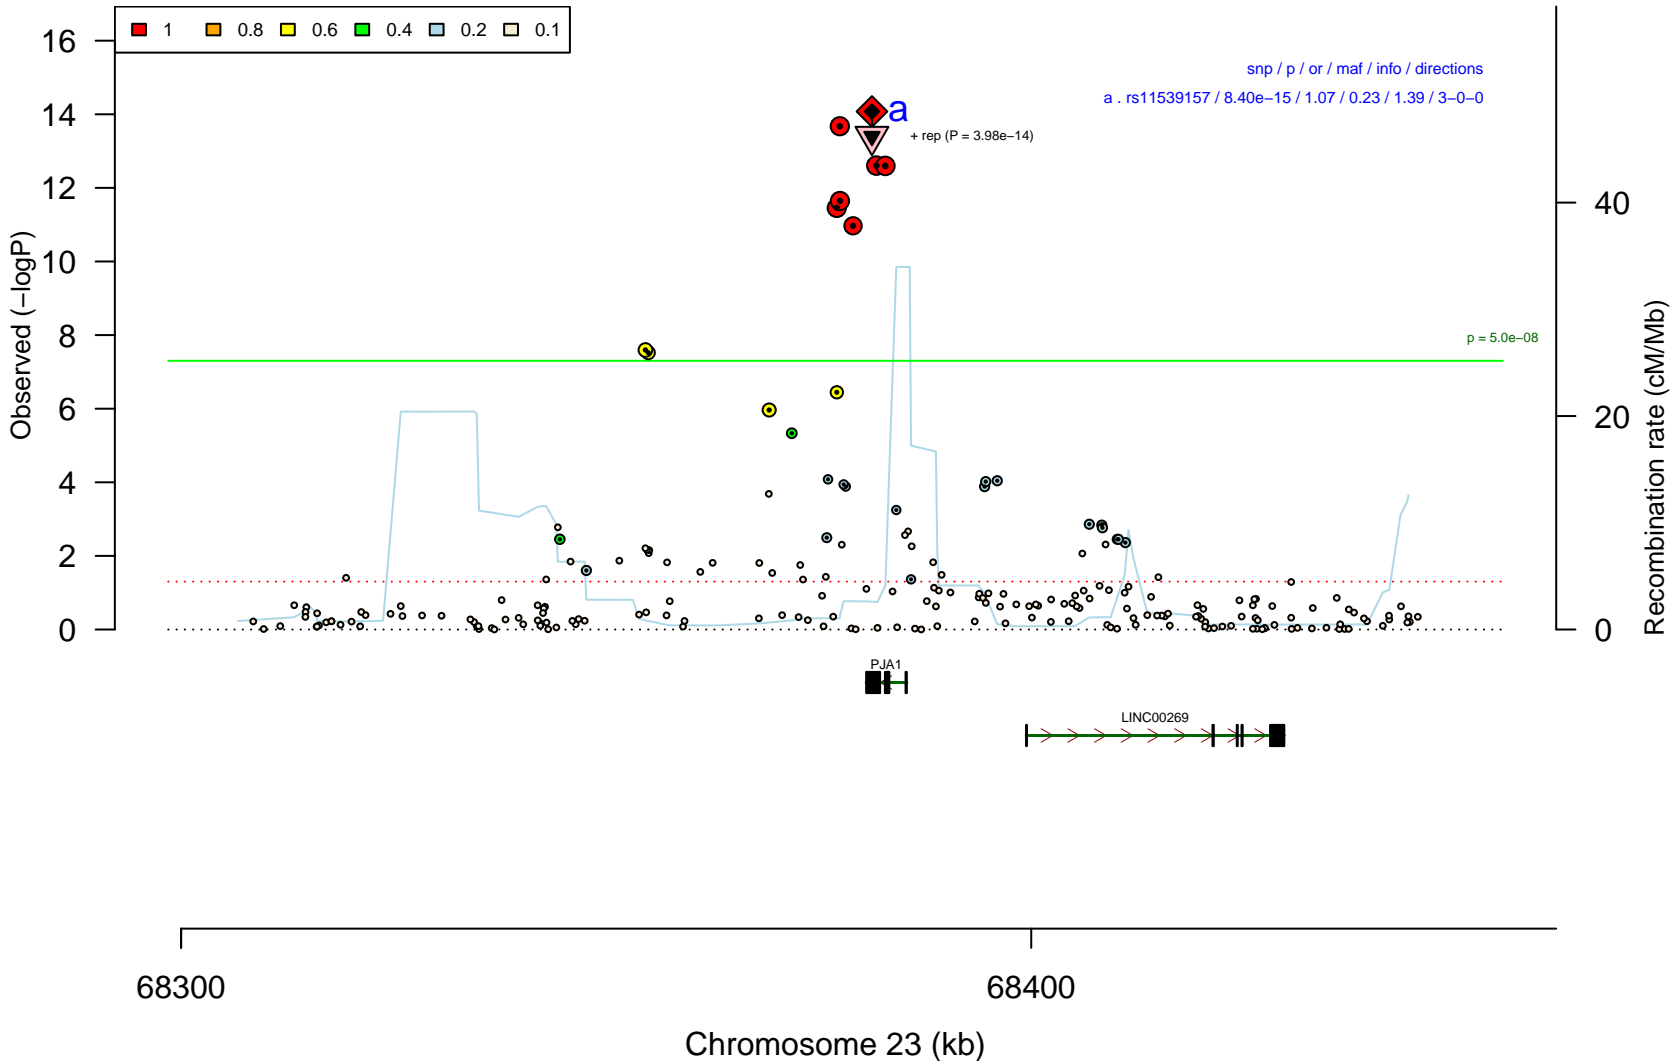

# scz\_w3\_HRC\_chrX\_deduped\_0618a.3.chr23

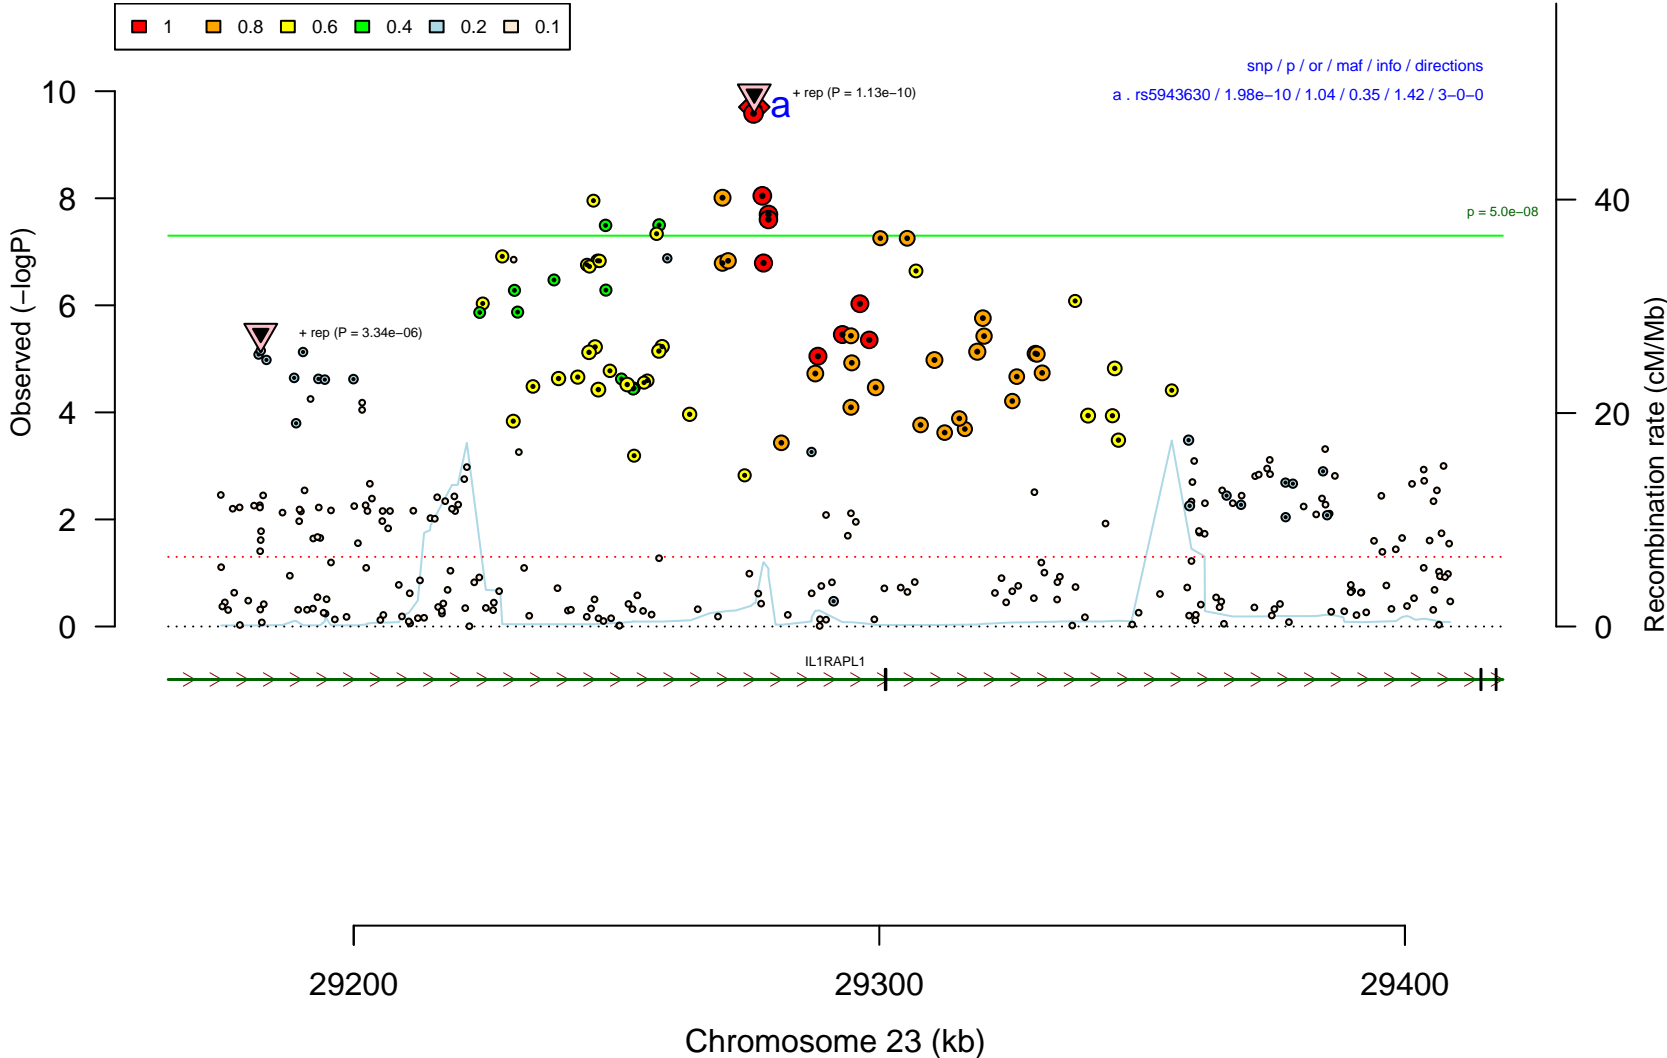

# scz\_w3\_HRC\_chrX\_deduped\_0618a.4.chr23

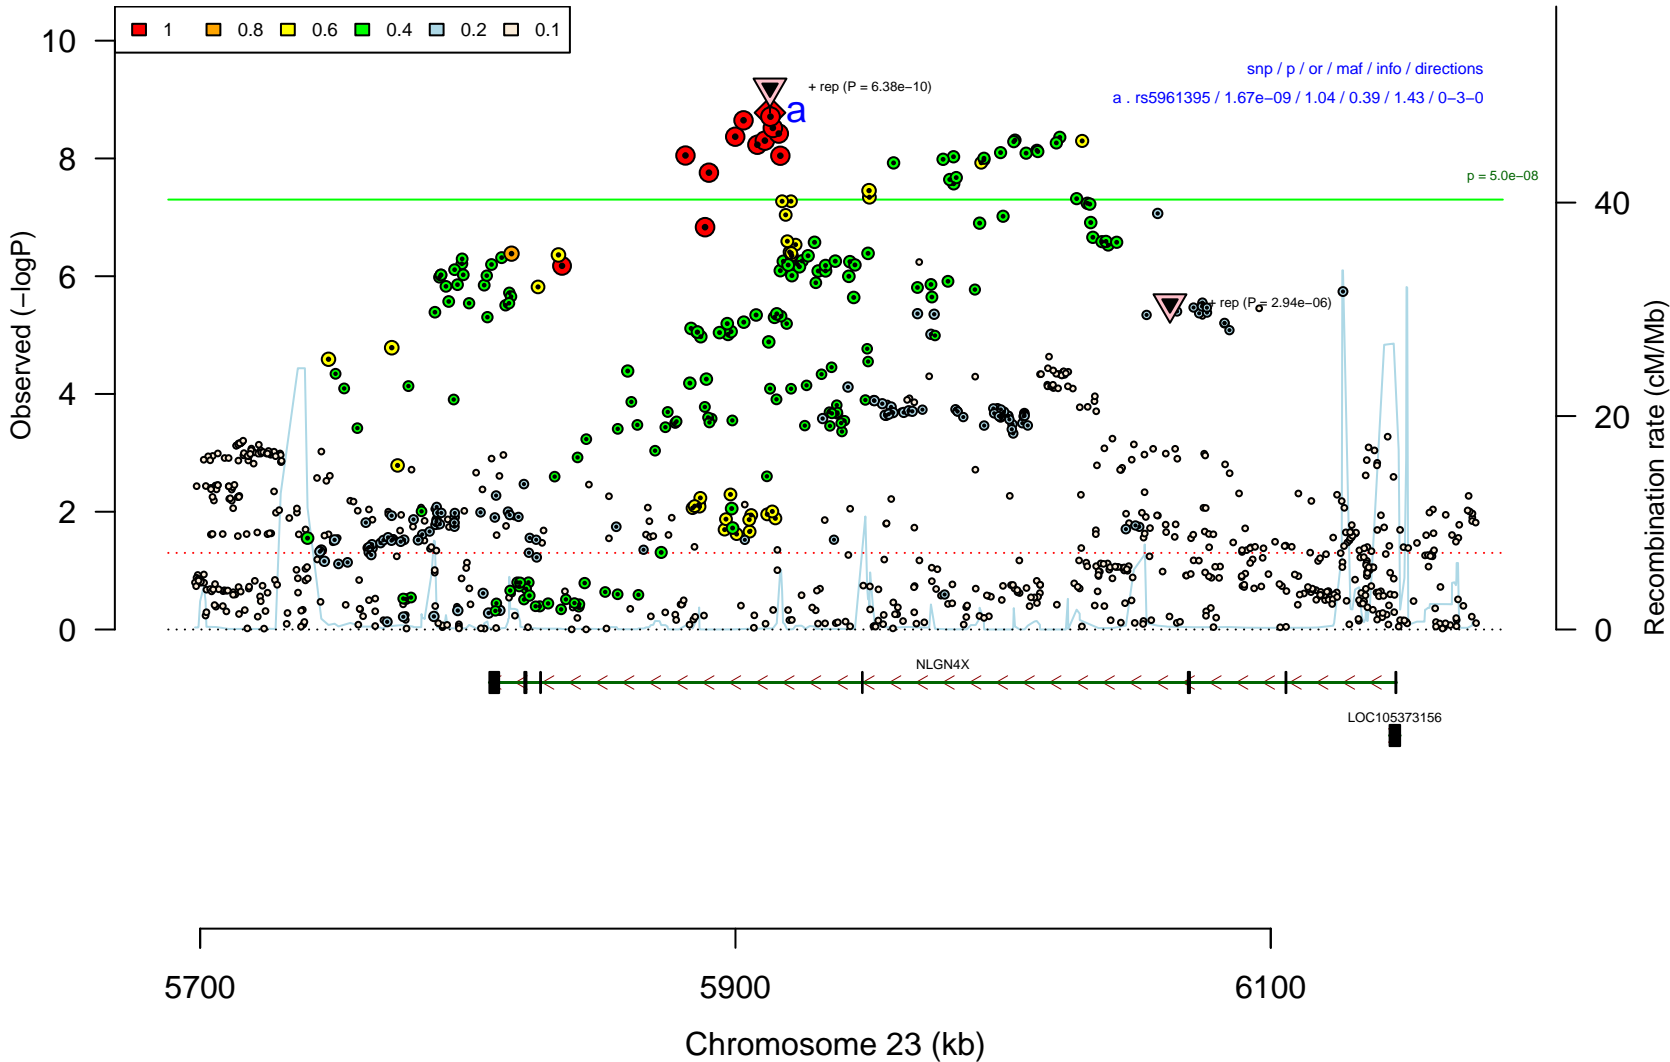

# scz\_w3\_HRC\_chrX\_deduped\_0618a.5.chr23

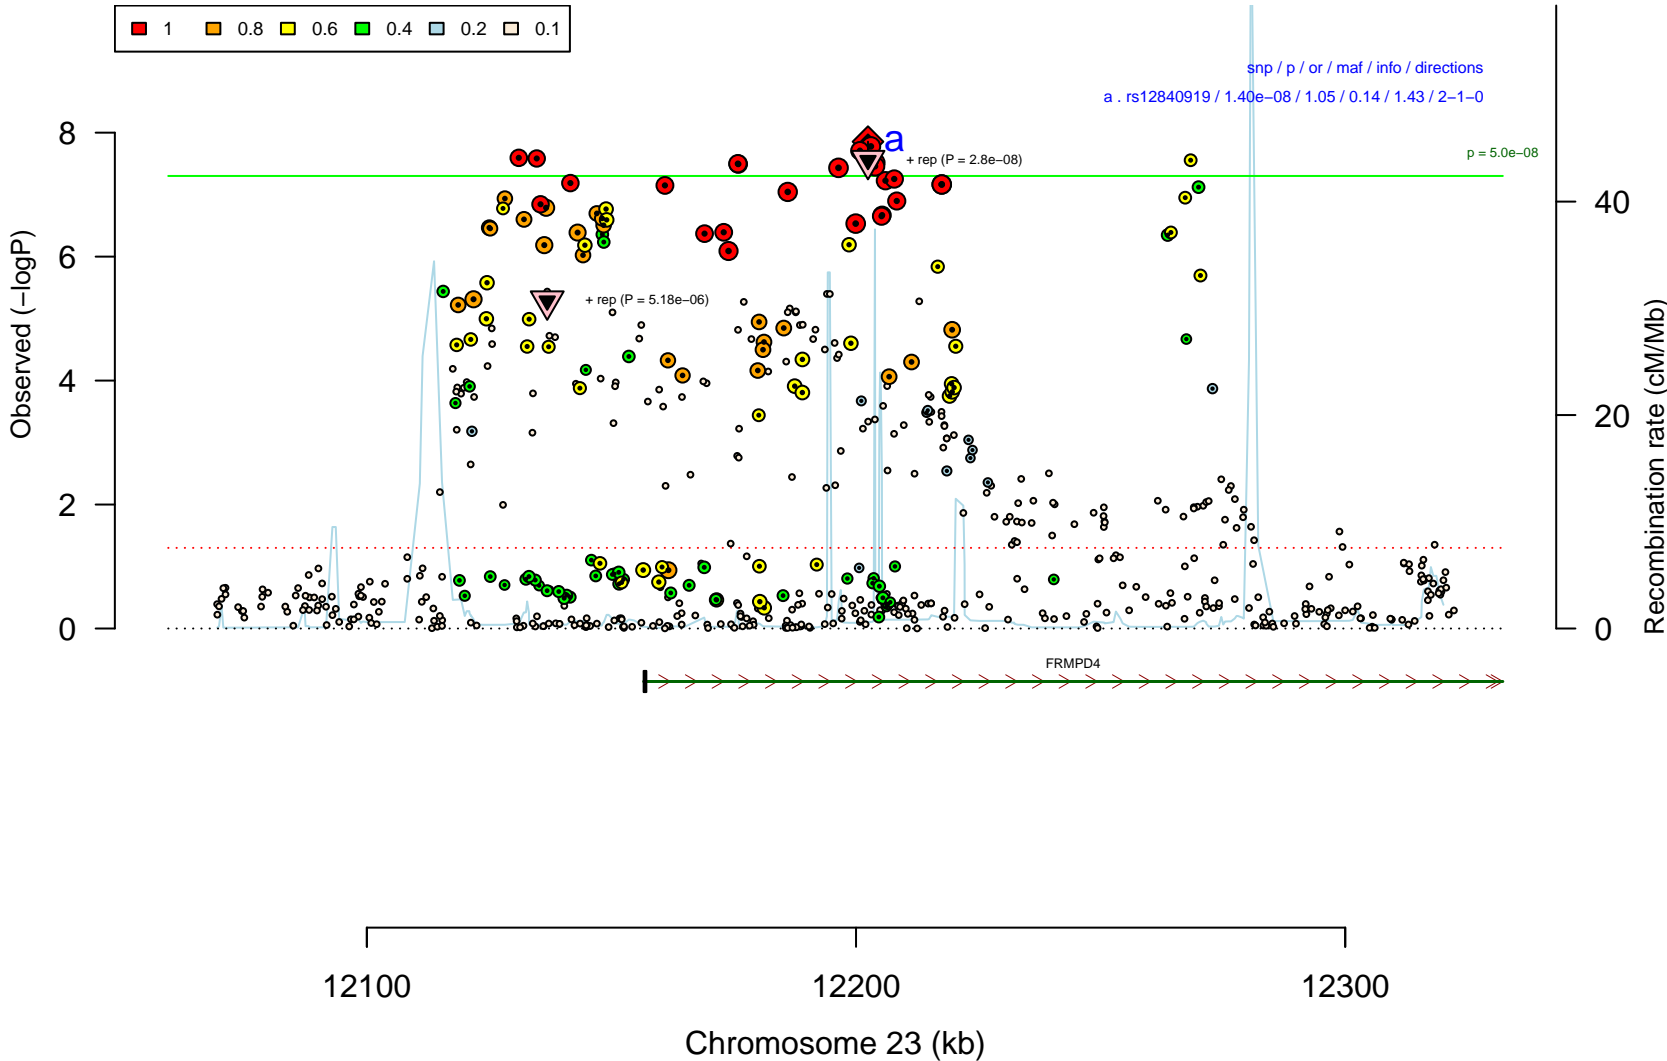

Supplement: NIHMS1824605-supplement-Figure_S1b.pdf [file NIHMS1824605-supplement-Figure_S1b.pdf]
